# Supplementary material for: Conserved organ-specific microbial assemblages in different populations of a terrestrial crab
Source: PubMed Central journal article supplement (PMC10291174; doi:10.3389/fmicb.2023.1113617), 2023-06-12
Supplement: Table_1.pdf [file Table_1.pdf]

**Table S1: Number of samples sequenced for 16S rRNA gene and ITS1 region.** Column one reported the sample id of each condition whereas column two reported the biological matrix sampled (MG, midgut; HG, hindgut; GO, gonads; GI, gills; L, litter; S, soil; W, water; WD, water debris). The sampling site was reported in column three together with the crab's number (reported in column four). Samples with the same crab's number within the same sample site are sample coming from the same specimen (experimental unit)—this information was not reported for environmental samples which, in this study, did not share a common experimental unit. The number of samples sequenced was reported in column five and six for 16S rRNA and ITS1 amplicons, respectively. The last column of the table identifies the technical replicates used for ITS1 validation.

| <b>sample.id</b> | <b>env</b> | <b>site</b> | <b>crab</b> | <b>16S</b> | <b>its</b> | <b>technical replicates (ITS only)</b> |
|------------------|------------|-------------|-------------|------------|------------|----------------------------------------|
| MG_SH_1          | MG         | SH          |             | 1          | 2          | 1                                      |
| MG_SH_2          | MG         | SH          |             | 2          | 1          | 2                                      |
| MG_SH_3          | MG         | SH          |             | 3          | 1          | 2 yes                                  |
| MG_SH_4          | MG         | SH          |             | 4          | 1          | 2                                      |
| MG_SH_5          | MG         | SH          |             | 5          | 1          | 1                                      |
| MG_SH_6          | MG         | SH          |             | 6          | 1          | 2                                      |
| MG_SH_7          | MG         | SH          |             | 7          | 1          | 2                                      |
| MG_SH_8          | MG         | SH          |             | 8          | 1          | 1                                      |
| MG_SH_9          | MG         | SH          |             | 9          | 1          | 2                                      |
| MG_SH_10         | MG         | SH          |             | 10         | 1          | 2                                      |
| MG_SH_11         | MG         | SH          |             | 11         | 1          | 3                                      |
| MG_SK_1          | MG         | SK          |             | 1          | 1          | 2                                      |
| MG_SK_2          | MG         | SK          |             | 2          | 1          | 2                                      |
| MG_SK_3          | MG         | SK          |             | 3          | 1          | 2                                      |
| MG_SK_4          | MG         | SK          |             | 4          | 1          | 1                                      |
| MG_SK_5          | MG         | SK          |             | 5          | 1          | 1                                      |
| MG_SK_6          | MG         | SK          |             | 6          | 1          | 3                                      |
| MG_SK_7          | MG         | SK          |             | 7          | 1          | 1                                      |
| MG_SK_8          | MG         | SK          |             | 8          | 1          | 1                                      |
| MG_SK_9          | MG         | SK          |             | 9          | 2          | 2                                      |
| MG_SK_10         | MG         | SK          |             | 10         | 1          | 2                                      |
| MG_SK_11         | MG         | SK          |             | 11         | 1          | 2 yes                                  |
| MG_TKP_1         | MG         | TKP         |             | 1          | 2          | 1                                      |
| MG_TKP_2         | MG         | TKP         |             | 2          | 1          | 2                                      |
| MG_TKP_3         | MG         | TKP         |             | 3          | 1          | 2                                      |
| MG_TKP_4         | MG         | TKP         |             | 4          | 1          | 3                                      |
| MG_TKP_5         | MG         | TKP         |             | 5          | 1          | 2                                      |
| MG_TKP_6         | MG         | TKP         |             | 6          | 1          | 1                                      |
| MG_TKP_7         | MG         | TKP         |             | 7          | 1          | 1                                      |
| MG_TKP_8         | MG         | TKP         |             | 8          | 1          | 2                                      |
| MG_TKP_9         | MG         | TKP         |             | 9          | 1          | 1                                      |
| MG_TKP_10        | MG         | TKP         |             | 10         | 1          | 2                                      |
| MG_TKP_11        | MG         | TKP         |             | 11         | 1          | 1                                      |
| HG_SH_1          | HG         | SH          |             | 1          | 2          | 2 yes                                  |
| HG_SH_2          | HG         | SH          |             | 2          | 1          | 1                                      |
| HG_SH_3          | HG         | SH          |             | 3          | 1          | 2                                      |
| HG_SH_4          | HG         | SH          |             | 4          | 1          | 2                                      |
| HG_SH_5          | HG         | SH          |             | 5          | 2          | 1                                      |
| HG_SH_6          | HG         | SH          |             | 6          | 1          | 1                                      |
| HG_SH_7          | HG         | SH          |             | 7          | 1          | 1                                      |
| HG_SH_8          | HG         | SH          |             | 8          | 1          | 1                                      |
| HG_SH_9          | HG         | SH          |             | 9          | 1          | 1                                      |
| HG_SH_10         | HG         | SH          |             | 10         | 1          | 1                                      |
| HG_SH_11         | HG         | SH          |             | 11         | 1          | 1                                      |
| HG_SK_1          | HG         | SK          |             | 1          | 1          | 2                                      |
| HG_SK_2          | HG         | SK          |             | 2          | 1          | 1                                      |
| HG_SK_3          | HG         | SK          |             | 3          | 1          | 1                                      |
| HG_SK_4          | HG         | SK          |             | 4          | 1          | 1                                      |
| HG_SK_5          | HG         | SK          |             | 5          | 1          | 2                                      |

|           |    |     |    |   |       |
|-----------|----|-----|----|---|-------|
| HG_SK_6   | HG | SK  | 6  | 1 | 2 yes |
| HG_SK_7   | HG | SK  | 7  | 1 | 1     |
| HG_SK_8   | HG | SK  | 8  | 1 | 1     |
| HG_SK_9   | HG | SK  | 9  | 1 | 2     |
| HG_SK_10  | HG | SK  | 10 | 1 | 1     |
| HG_SK_11  | HG | SK  | 11 | 1 | 1     |
| HG_TKP_1  | HG | TKP | 1  | 1 | 2     |
| HG_TKP_2  | HG | TKP | 2  | 1 | 1     |
| HG_TKP_3  | HG | TKP | 3  | 2 | 1     |
| HG_TKP_4  | HG | TKP | 4  | 1 | 1     |
| HG_TKP_5  | HG | TKP | 5  | 1 | 2     |
| HG_TKP_6  | HG | TKP | 6  | 1 | 2     |
| HG_TKP_7  | HG | TKP | 7  | 1 | 1     |
| HG_TKP_8  | HG | TKP | 8  | 1 | 2     |
| HG_TKP_9  | HG | TKP | 9  | 1 | 1     |
| HG_TKP_10 | HG | TKP | 10 | 1 | 2     |
| HG_TKP_11 | HG | TKP | 11 | 1 | 1     |
| GO_SH_1   | GO | SH  | 1  | 1 | 1     |
| GO_SH_2   | GO | SH  | 2  | 1 | 1     |
| GO_SH_3   | GO | SH  | 3  | 1 | 2     |
| GO_SH_4   | GO | SH  | 4  | 1 | 2     |
| GO_SH_5   | GO | SH  | 5  | 1 | 2     |
| GO_SH_6   | GO | SH  | 6  | 1 | 1     |
| GO_SH_7   | GO | SH  | 7  | 1 | 1     |
| GO_SH_8   | GO | SH  | 8  | 1 | 2 yes |
| GO_SH_9   | GO | SH  | 9  | 1 | 1     |
| GO_SH_10  | GO | SH  | 10 | 1 | 1     |
| GO_SH_11  | GO | SH  | 11 | 1 | 1     |
| GO_SK_1   | GO | SK  | 1  | 1 | 1     |
| GO_SK_2   | GO | SK  | 2  | 1 | 1     |
| GO_SK_3   | GO | SK  | 3  | 1 | 1     |
| GO_SK_4   | GO | SK  | 4  | 1 | 1     |
| GO_SK_5   | GO | SK  | 5  | 1 | 1     |
| GO_SK_6   | GO | SK  | 6  | 1 | 1     |
| GO_SK_7   | GO | SK  | 7  | 1 | 1     |
| GO_SK_8   | GO | SK  | 8  | 1 | 1     |
| GO_SK_9   | GO | SK  | 9  | 1 | 1     |
| GO_SK_10  | GO | SK  | 10 | 1 | 1     |
| GO_SK_11  | GO | SK  | 11 | 1 | 1     |
| GO_TKP_1  | GO | TKP | 1  | 1 | 2     |
| GO_TKP_2  | GO | TKP | 2  | 1 | 1     |
| GO_TKP_3  | GO | TKP | 3  | 1 | 1     |
| GO_TKP_4  | GO | TKP | 4  | 1 | 1     |
| GO_TKP_5  | GO | TKP | 5  | 1 | 1     |
| GO_TKP_6  | GO | TKP | 6  | 1 | 2     |
| GO_TKP_7  | GO | TKP | 7  | 1 | 2 yes |
| GO_TKP_8  | GO | TKP | 8  | 1 | 1     |
| GO_TKP_9  | GO | TKP | 9  | 1 | 1     |
| GO_TKP_10 | GO | TKP | 10 | 1 | 1     |
| GO_TKP_11 | GO | TKP | 11 | 1 | 2     |

|           |    |     |    |   |       |
|-----------|----|-----|----|---|-------|
| GI_SH_1   | GI | SH  | 1  | 1 | 1     |
| GI_SH_2   | GI | SH  | 2  | 2 | 1     |
| GI_SH_3   | GI | SH  | 3  | 1 | 1     |
| GI_SH_4   | GI | SH  | 4  | 2 | 2 yes |
| GI_SH_5   | GI | SH  | 5  | 1 | 1     |
| GI_SH_6   | GI | SH  | 6  | 1 | 1     |
| GI_SH_7   | GI | SH  | 7  | 1 | 1     |
| GI_SH_8   | GI | SH  | 8  | 1 | 1     |
| GI_SH_9   | GI | SH  | 9  | 1 | 2 yes |
| GI_SH_10  | GI | SH  | 10 | 1 | 1     |
| GI_SH_11  | GI | SH  | 11 | 1 | 1     |
| GI_SK_1   | GI | SK  | 1  | 2 | 1     |
| GI_SK_2   | GI | SK  | 2  | 2 | 1     |
| GI_SK_3   | GI | SK  | 3  | 2 | 1     |
| GI_SK_4   | GI | SK  | 4  | 2 | 1     |
| GI_SK_5   | GI | SK  | 5  | 2 | 1     |
| GI_SK_6   | GI | SK  | 6  | 2 | 1     |
| GI_SK_7   | GI | SK  | 7  | 2 | 1     |
| GI_SK_8   | GI | SK  | 8  | 2 | 1     |
| GI_SK_9   | GI | SK  | 9  | 2 | 1     |
| GI_SK_10  | GI | SK  | 10 | 2 | 1     |
| GI_SK_11  | GI | SK  | 11 | 1 | 1     |
| GI_TKP_1  | GI | TKP | 1  | 2 | 1     |
| GI_TKP_2  | GI | TKP | 2  | 1 | 1     |
| GI_TKP_3  | GI | TKP | 3  | 2 | 1     |
| GI_TKP_4  | GI | TKP | 4  | 2 | 1     |
| GI_TKP_5  | GI | TKP | 5  | 2 | 1     |
| GI_TKP_6  | GI | TKP | 6  | 1 | 1     |
| GI_TKP_7  | GI | TKP | 7  | 2 | 1     |
| GI_TKP_8  | GI | TKP | 8  | 2 | 1     |
| GI_TKP_9  | GI | TKP | 9  | 1 | 1     |
| GI_TKP_10 | GI | TKP | 10 | 1 | 1     |
| GI_TKP_11 | GI | TKP | 11 | 1 | 1     |
| L_SH_1    | L  | SH  |    | 1 | 1     |
| L_SH_2    | L  | SH  |    | 1 | 1     |
| L_SH_3    | L  | SH  |    | 1 | 1     |
| L_SH_4    | L  | SH  |    | 1 | 2     |
| L_SH_5    | L  | SH  |    | 1 | 1     |
| L_SK_1    | L  | SK  |    | 2 | 1     |
| L_SK_2    | L  | SK  |    | 2 | 1     |
| L_SK_3    | L  | SK  |    | 2 | 1     |
| L_SK_4    | L  | SK  |    | 1 | 1     |
| L_SK_5    | L  | SK  |    | 1 | 1     |
| L_TKP_1   | L  | TKP |    | 2 | 1     |
| L_TKP_2   | L  | TKP |    | 2 | 1     |
| L_TKP_3   | L  | TKP |    | 1 | 1     |
| L_TKP_4   | L  | TKP |    | 1 | 1     |
| L_TKP_5   | L  | TKP |    | 1 | 1     |
| S_SH_1    | S  | SH  |    | 2 | 1     |
| S_SH_2    | S  | SH  |    | 2 | 1     |

|          |    |     |   |   |
|----------|----|-----|---|---|
| S_SH_3   | S  | SH  | 2 | 1 |
| S_SH_4   | S  | SH  | 1 | 1 |
| S_SH_5   | S  | SH  | 2 | 1 |
| S_SK_1   | S  | SK  | 2 | 1 |
| S_SK_2   | S  | SK  | 2 | 1 |
| S_SK_3   | S  | SK  | 2 | 1 |
| S_SK_4   | S  | SK  | 2 | 1 |
| S_SK_5   | S  | SK  | 2 | 1 |
| S_TKP_1  | S  | TKP | 1 | 1 |
| S_TKP_2  | S  | TKP | 2 | 1 |
| S_TKP_3  | S  | TKP | 2 | 1 |
| S_TKP_4  | S  | TKP | 2 | 1 |
| S_TKP_5  | S  | TKP | 2 | 1 |
| W_SH_1   | W  | SH  | 2 | 1 |
| W_SH_2   | W  | SH  | 2 | 1 |
| W_SH_3   | W  | SH  | 2 | 1 |
| W_SH_4   | W  | SH  | 2 | 1 |
| W_SH_5   | W  | SH  | 2 | 1 |
| W_SK_1   | W  | SK  | 2 | 1 |
| W_SK_2   | W  | SK  | 2 | 1 |
| W_SK_3   | W  | SK  | 2 | 1 |
| W_SK_4   | W  | SK  | 2 | 1 |
| W_SK_5   | W  | SK  | 2 | 1 |
| W_TKP_1  | W  | TKP | 2 | 1 |
| W_TKP_2  | W  | TKP | 2 | 2 |
| W_TKP_3  | W  | TKP | 2 | 2 |
| W_TKP_4  | W  | TKP | 2 | 1 |
| W_TKP_5  | W  | TKP | 2 | 1 |
| WD_SH_1  | WD | SH  | 1 | 2 |
| WD_SH_2  | WD | SH  | 1 | 2 |
| WD_SH_3  | WD | SH  | 1 | 2 |
| WD_SH_4  | WD | SH  | 1 | 2 |
| WD_SH_5  | WD | SH  | 1 | 2 |
| WD_SK_1  | WD | SK  | 1 | 2 |
| WD_SK_2  | WD | SK  | 1 | 2 |
| WD_SK_3  | WD | SK  | 1 | 2 |
| WD_SK_4  | WD | SK  | 1 | 2 |
| WD_SK_5  | WD | SK  | 1 | 2 |
| WD_TKP_1 | WD | TKP | 1 | 1 |
| WD_TKP_2 | WD | TKP | 1 | 1 |
| WD_TKP_3 | WD | TKP | 1 | 1 |
| WD_TKP_4 | WD | TKP | 1 | 1 |
| WD_TKP_5 | WD | TKP | 1 | 1 |

**Table S2: Accuracy and correlation between replicates.** Sample IDs were reported in the first column whereas crab's organs were reported in the second one. The number of fungal ASVs detected in all organs (GI, gills; GO, gonads; HG and MG, hind- and midgut) was reported in the "N" column. Spearman's rank correlation coefficient was reported in the  $\rho$  column whereas accuracy was reported in the last column of the table. Other columns report values used to calculate the accuracy as explained in the "Fungal amplicon sequence variant evaluation" section.

| Sample ID | Organ | N  | $\rho$ | TP | TN | FP + FN | Accuracy |
|-----------|-------|----|--------|----|----|---------|----------|
| GI_SH_4   | GI    | 82 | 0.8    | 10 | 66 | 6       | 0.93     |
| GI_SH_9   | GI    | 82 | 0.67   | 5  | 71 | 6       | 0.93     |
| GO_SH_8   | GO    | 82 | 1      | 2  | 60 | 20      | 0.76     |
| GO_TKP_7  | GO    | 82 | 0.97   | 11 | 70 | 1       | 0.99     |
| HG_SH_1   | HG    | 82 | 1      | 5  | 71 | 6       | 0.93     |
| HG_SK_6   | HG    | 82 | 0.98   | 12 | 59 | 11      | 0.87     |
| MG_SH_3   | MG    | 82 | 0.87   | 6  | 70 | 6       | 0.93     |
| MG_SK_11  | MG    | 82 | 1      | 4  | 71 | 7       | 0.91     |

**Table S3: Microbial diversity of samples included in the study.** Microbial diversity was calculated considering counts from both 16S rRNA and ITS1 amplicon sequencing. Sample IDs were reported in the first column (called ID) whereas sample types and sampling sites were reported in the second and the third ones, respectively. The number of ASVs detected in each sample (also known as the “Richness”) was reported together with the number of singletons and doubletons detected (defined as the number of ASVs with a count of one and two across all samples, respectively). The last two columns of the table reported the inverse Simpson index and the Good’s coverage for all samples (for additional information on how these indices were computed see “Microbial diversity within and between sample types” section).

| ID        | Sample type | Site | Number of ASVs | Number of singletons | Number of doubletons | Inverse Simpson index | Good's coverage estimator |
|-----------|-------------|------|----------------|----------------------|----------------------|-----------------------|---------------------------|
| MG_SH_1   | MG          | SH   | 355            | 0                    | 5                    | 4.818706231           | 100                       |
| MG_SH_10  | MG          | SH   | 409            | 4                    | 7                    | 27.03786021           | 99.9856511                |
| MG_SH_11  | MG          | SH   | 283            | 2                    | 2                    | 11.66302146           | 99.99524545               |
| MG_SH_2   | MG          | SH   | 379            | 5                    | 6                    | 22.03412969           | 99.97415958               |
| MG_SH_3   | MG          | SH   | 601            | 3                    | 4                    | 22.3623928            | 99.99410868               |
| MG_SH_4   | MG          | SH   | 287            | 0                    | 0                    | 10.48148819           | 100                       |
| MG_SH_5   | MG          | SH   | 321            | 0                    | 2                    | 8.412803658           | 100                       |
| MG_SH_6   | MG          | SH   | 349            | 1                    | 0                    | 12.27959394           | 99.99906696               |
| MG_SH_7   | MG          | SH   | 252            | 2                    | 0                    | 13.75124693           | 99.99693438               |
| MG_SH_8   | MG          | SH   | 426            | 0                    | 0                    | 5.33375842            | 100                       |
| MG_SH_9   | MG          | SH   | 429            | 3                    | 4                    | 17.72186224           | 99.98739614               |
| MG_SK_1   | MG          | SK   | 186            | 0                    | 0                    | 21.1856249            | 100                       |
| MG_SK_10  | MG          | SK   | 363            | 5                    | 10                   | 30.44687129           | 99.96150112               |
| MG_SK_11  | MG          | SK   | 470            | 2                    | 4                    | 26.5393647            | 99.99489136               |
| MG_SK_2   | MG          | SK   | 275            | 1                    | 0                    | 5.671059412           | 99.99909447               |
| MG_SK_3   | MG          | SK   | 542            | 2                    | 5                    | 37.40671634           | 99.99453337               |
| MG_SK_4   | MG          | SK   | 394            | 0                    | 2                    | 18.0872314            | 100                       |
| MG_SK_5   | MG          | SK   | 411            | 0                    | 1                    | 13.90561351           | 100                       |
| MG_SK_6   | MG          | SK   | 658            | 5                    | 7                    | 35.39470196           | 99.98775102               |
| MG_SK_7   | MG          | SK   | 559            | 0                    | 0                    | 11.24145972           | 100                       |
| MG_SK_8   | MG          | SK   | 362            | 0                    | 6                    | 18.5515724            | 100                       |
| MG_SK_9   | MG          | SK   | 730            | 0                    | 1                    | 20.13511029           | 100                       |
| MG_TKP_1  | MG          | TKP  | 854            | 1                    | 9                    | 14.1473312            | 99.99852363               |
| MG_TKP_10 | MG          | TKP  | 782            | 1                    | 11                   | 19.68293752           | 99.99837438               |
| MG_TKP_11 | MG          | TKP  | 488            | 2                    | 8                    | 23.20893597           | 99.99816511               |
| MG_TKP_2  | MG          | TKP  | 592            | 1                    | 6                    | 19.83853392           | 99.99765465               |
| MG_TKP_3  | MG          | TKP  | 430            | 5                    | 7                    | 13.48972354           | 99.98552119               |
| MG_TKP_4  | MG          | TKP  | 384            | 0                    | 1                    | 15.5623347            | 100                       |
| MG_TKP_5  | MG          | TKP  | 833            | 3                    | 1                    | 30.64169241           | 99.9951857                |
| MG_TKP_6  | MG          | TKP  | 485            | 3                    | 7                    | 15.81227072           | 99.99198904               |
| MG_TKP_7  | MG          | TKP  | 393            | 0                    | 0                    | 19.85198873           | 100                       |
| MG_TKP_8  | MG          | TKP  | 238            | 1                    | 1                    | 3.918777089           | 99.99722703               |
| MG_TKP_9  | MG          | TKP  | 194            | 0                    | 0                    | 8.494027457           | 100                       |
| HG_SH_1   | HG          | SH   | 254            | 1                    | 0                    | 4.564213113           | 99.99955309               |
| HG_SH_10  | HG          | SH   | 460            | 2                    | 5                    | 16.23235827           | 99.99711357               |
| HG_SH_11  | HG          | SH   | 566            | 7                    | 7                    | 26.71816502           | 99.98352915               |
| HG_SH_2   | HG          | SH   | 464            | 5                    | 16                   | 12.97688791           | 99.99500114               |
| HG_SH_3   | HG          | SH   | 692            | 3                    | 6                    | 45.17913289           | 99.99498326               |
| HG_SH_4   | HG          | SH   | 330            | 0                    | 0                    | 10.13476703           | 100                       |
| HG_SH_5   | HG          | SH   | 618            | 0                    | 0                    | 265.8918303           | 100                       |
| HG_SH_6   | HG          | SH   | 295            | 0                    | 2                    | 15.28308989           | 100                       |
| HG_SH_7   | HG          | SH   | 371            | 1                    | 2                    | 7.779032915           | 99.99864594               |
| HG_SH_8   | HG          | SH   | 268            | 2                    | 8                    | 8.302922738           | 99.9981124                |
| HG_SH_9   | HG          | SH   | 623            | 7                    | 5                    | 13.16694071           | 99.98497681               |
| HG_SK_1   | HG          | SK   | 649            | 2                    | 5                    | 26.95881626           | 99.99739245               |
| HG_SK_10  | HG          | SK   | 570            | 4                    | 19                   | 15.22326085           | 99.99206771               |
| HG_SK_11  | HG          | SK   | 305            | 1                    | 0                    | 12.95790294           | 99.99808561               |
| HG_SK_2   | HG          | SK   | 524            | 0                    | 0                    | 16.04426432           | 100                       |
| HG_SK_3   | HG          | SK   | 731            | 6                    | 16                   | 38.1089613            | 99.99083768               |
| HG_SK_4   | HG          | SK   | 568            | 2                    | 0                    | 27.27063351           | 99.99739827               |
| HG_SK_5   | HG          | SK   | 540            | 3                    | 5                    | 30.7080746            | 99.99088424               |
| HG_SK_6   | HG          | SK   | 503            | 0                    | 5                    | 17.70261096           | 100                       |
| HG_SK_7   | HG          | SK   | 476            | 1                    | 9                    | 6.970532973           | 99.99903272               |
| HG_SK_8   | HG          | SK   | 235            | 0                    | 0                    | 10.43029724           | 100                       |
| HG_SK_9   | HG          | SK   | 372            | 0                    | 1                    | 11.1799848            | 100                       |
| HG_TKP_1  | HG          | TKP  | 293            | 0                    | 0                    | 9.567358711           | 100                       |
| HG_TKP_10 | HG          | TKP  | 813            | 2                    | 2                    | 28.87181711           | 99.99699725               |
| HG_TKP_11 | HG          | TKP  | 466            | 1                    | 0                    | 11.72743476           | 99.99934608               |
| HG_TKP_2  | HG          | TKP  | 626            | 2                    | 8                    | 18.55507036           | 99.9964843                |
| HG_TKP_3  | HG          | TKP  | 294            | 0                    | 0                    | 7.344452561           | 100                       |
| HG_TKP_4  | HG          | TKP  | 532            | 2                    | 0                    | 13.44776479           | 99.99791029               |
| HG_TKP_5  | HG          | TKP  | 613            | 0                    | 5                    | 13.90994856           | 100                       |
| HG_TKP_6  | HG          | TKP  | 837            | 2                    | 9                    | 37.32583202           | 99.99746098               |
| HG_TKP_7  | HG          | TKP  | 561            | 1                    | 9                    | 36.28835372           | 99.99877768               |
| HG_TKP_8  | HG          | TKP  | 902            | 5                    | 12                   | 39.82095153           | 99.99357096               |



|           |    |     |      |    |     |             |             |
|-----------|----|-----|------|----|-----|-------------|-------------|
| HG_TKP_9  | HG | TKP | 305  | 1  | 8   | 9.220143786 | 99.9987925  |
| GO_SH_1   | GO | SH  | 248  | 0  | 0   | 6.786578525 | 100         |
| GO_SH_10  | GO | SH  | 8    | 0  | 0   | 4.87960396  | 100         |
| GO_SH_11  | GO | SH  | 65   | 8  | 3   | 1.642661962 | 99.94636802 |
| GO_SH_2   | GO | SH  | 15   | 0  | 0   | 6.991360158 | 100         |
| GO_SH_3   | GO | SH  | 58   | 0  | 3   | 6.897210981 | 100         |
| GO_SH_4   | GO | SH  | 80   | 0  | 0   | 10.06046153 | 100         |
| GO_SH_5   | GO | SH  | 38   | 0  | 0   | 7.602746791 | 100         |
| GO_SH_6   | GO | SH  | 141  | 7  | 3   | 18.86112154 | 99.93577061 |
| GO_SH_7   | GO | SH  | 86   | 0  | 0   | 2.232154107 | 100         |
| GO_SH_8   | GO | SH  | 87   | 8  | 5   | 9.097225582 | 99.90433536 |
| GO_SH_9   | GO | SH  | 48   | 0  | 0   | 1.478507632 | 100         |
| GO_SK_1   | GO | SK  | 133  | 1  | 7   | 1.738520331 | 99.99510553 |
| GO_SK_10  | GO | SK  | 149  | 0  | 10  | 6.87797961  | 100         |
| GO_SK_11  | GO | SK  | 155  | 0  | 3   | 4.73212502  | 100         |
| GO_SK_2   | GO | SK  | 139  | 0  | 1   | 7.136700186 | 100         |
| GO_SK_3   | GO | SK  | 50   | 0  | 0   | 1.418786235 | 100         |
| GO_SK_4   | GO | SK  | 156  | 3  | 1   | 2.003806205 | 99.98317875 |
| GO_SK_5   | GO | SK  | 11   | 0  | 0   | 4.888260255 | 100         |
| GO_SK_6   | GO | SK  | 116  | 1  | 1   | 2.790798986 | 99.99403291 |
| GO_SK_7   | GO | SK  | 87   | 7  | 5   | 9.706186979 | 99.89617167 |
| GO_SK_8   | GO | SK  | 213  | 8  | 11  | 27.24675722 | 99.91806819 |
| GO_SK_9   | GO | SK  | 118  | 0  | 0   | 1.983700928 | 100         |
| GO_TKP_1  | GO | TKP | 148  | 0  | 0   | 3.327560388 | 100         |
| GO_TKP_10 | GO | TKP | 304  | 1  | 2   | 7.863097569 | 99.99650031 |
| GO_TKP_11 | GO | TKP | 15   | 0  | 0   | 6.285752779 | 100         |
| GO_TKP_2  | GO | TKP | 173  | 0  | 0   | 3.647923199 | 100         |
| GO_TKP_3  | GO | TKP | 116  | 1  | 6   | 1.356976999 | 99.99764343 |
| GO_TKP_4  | GO | TKP | 115  | 0  | 1   | 2.526557592 | 100         |
| GO_TKP_5  | GO | TKP | 135  | 0  | 0   | 1.585009434 | 100         |
| GO_TKP_6  | GO | TKP | 157  | 0  | 0   | 10.99292462 | 100         |
| GO_TKP_7  | GO | TKP | 188  | 0  | 0   | 2.145117077 | 100         |
| GO_TKP_8  | GO | TKP | 330  | 0  | 10  | 4.201787869 | 100         |
| GO_TKP_9  | GO | TKP | 82   | 0  | 0   | 1.170411259 | 100         |
| GI_SH_1   | GI | SH  | 318  | 12 | 15  | 44.45981897 | 99.95295381 |
| GI_SH_10  | GI | SH  | 5517 | 28 | 152 | 195.4047557 | 99.9907388  |
| GI_SH_11  | GI | SH  | 1599 | 4  | 29  | 206.9616715 | 99.99232945 |
| GI_SH_2   | GI | SH  | 70   | 4  | 5   | 6.711664078 | 99.98342664 |
| GI_SH_3   | GI | SH  | 1033 | 4  | 0   | 346.4219903 | 99.98545936 |
| GI_SH_4   | GI | SH  | 501  | 1  | 0   | 12.2802025  | 99.99920005 |
| GI_SH_5   | GI | SH  | 2520 | 8  | 39  | 537.8104584 | 99.98944162 |
| GI_SH_6   | GI | SH  | 2465 | 11 | 23  | 623.1416422 | 99.98455607 |
| GI_SH_7   | GI | SH  | 2709 | 13 | 44  | 546.6640852 | 99.98449673 |
| GI_SH_8   | GI | SH  | 2236 | 9  | 22  | 265.4986009 | 99.98800418 |
| GI_SH_9   | GI | SH  | 6004 | 26 | 43  | 323.564784  | 99.98895319 |
| GI_SK_1   | GI | SK  | 412  | 2  | 0   | 22.27594957 | 99.99649021 |
| GI_SK_10  | GI | SK  | 106  | 0  | 0   | 11.88147467 | 100         |
| GI_SK_11  | GI | SK  | 8110 | 30 | 189 | 316.8538822 | 99.99170301 |
| GI_SK_2   | GI | SK  | 100  | 0  | 6   | 4.87147279  | 100         |
| GI_SK_3   | GI | SK  | 196  | 0  | 0   | 13.28176627 | 100         |
| GI_SK_4   | GI | SK  | 339  | 1  | 15  | 13.59608544 | 99.99904286 |
| GI_SK_5   | GI | SK  | 106  | 0  | 0   | 7.602865069 | 100         |
| GI_SK_6   | GI | SK  | 141  | 0  | 0   | 11.77085152 | 100         |
| GI_SK_7   | GI | SK  | 116  | 0  | 0   | 9.129463368 | 100         |
| GI_SK_8   | GI | SK  | 690  | 2  | 0   | 11.75406376 | 99.99716438 |
| GI_SK_9   | GI | SK  | 76   | 5  | 4   | 7.406711538 | 99.98032117 |
| GI_TKP_1  | GI | TKP | 242  | 0  | 0   | 8.470114606 | 100         |
| GI_TKP_10 | GI | TKP | 157  | 0  | 1   | 16.21312176 | 100         |
| GI_TKP_11 | GI | TKP | 173  | 0  | 0   | 13.01292865 | 100         |
| GI_TKP_2  | GI | TKP | 190  | 0  | 0   | 11.51358029 | 100         |
| GI_TKP_3  | GI | TKP | 203  | 0  | 9   | 15.60133616 | 100         |
| GI_TKP_4  | GI | TKP | 296  | 0  | 0   | 14.22255956 | 100         |
| GI_TKP_5  | GI | TKP | 266  | 0  | 16  | 10.40935667 | 100         |
| GI_TKP_6  | GI | TKP | 166  | 0  | 0   | 14.78461487 | 100         |
| GI_TKP_7  | GI | TKP | 165  | 0  | 0   | 8.509072812 | 100         |
| GI_TKP_8  | GI | TKP | 517  | 2  | 5   | 21.44907895 | 99.99721016 |
| GI_TKP_9  | GI | TKP | 198  | 1  | 0   | 8.134201012 | 99.99848557 |

|          |    |     |      |    |     |             |             |
|----------|----|-----|------|----|-----|-------------|-------------|
| L_SH_1   | L  | SH  | 354  | 28 | 20  | 28.13404566 | 99.9384296  |
| L_SH_2   | L  | SH  | 315  | 15 | 26  | 45.45411645 | 99.97184144 |
| L_SH_3   | L  | SH  | 96   | 1  | 8   | 6.276289819 | 99.99339061 |
| L_SH_4   | L  | SH  | 140  | 17 | 6   | 10.21267203 | 99.88984315 |
| L_SH_5   | L  | SH  | 140  | 14 | 13  | 15.78586133 | 99.94473746 |
| L_SK_1   | L  | SK  | 1018 | 20 | 34  | 70.91582835 | 99.97752192 |
| L_SK_2   | L  | SK  | 881  | 17 | 40  | 61.73500358 | 99.96933552 |
| L_SK_3   | L  | SK  | 868  | 14 | 37  | 61.20524562 | 99.97282555 |
| L_SK_4   | L  | SK  | 310  | 19 | 28  | 32.12721063 | 99.9525447  |
| L_SK_5   | L  | SK  | 286  | 17 | 18  | 26.72637423 | 99.93327768 |
| L_TKP_1  | L  | TKP | 685  | 1  | 22  | 6.488833714 | 99.998274   |
| L_TKP_2  | L  | TKP | 502  | 16 | 27  | 50.23624715 | 99.96808149 |
| L_TKP_3  | L  | TKP | 106  | 10 | 10  | 21.10578315 | 99.98262904 |
| L_TKP_4  | L  | TKP | 58   | 4  | 5   | 8.130822914 | 99.9600368  |
| L_TKP_5  | L  | TKP | 182  | 3  | 10  | 5.890670047 | 99.9856369  |
| S_SH_1   | S  | SH  | 511  | 2  | 6   | 36.63341386 | 99.99281863 |
| S_SH_2   | S  | SH  | 1374 | 4  | 24  | 63.78773963 | 99.99127508 |
| S_SH_3   | S  | SH  | 1865 | 4  | 55  | 240.0080686 | 99.99351054 |
| S_SH_4   | S  | SH  | 131  | 2  | 3   | 19.81877493 | 99.98710576 |
| S_SH_5   | S  | SH  | 988  | 1  | 18  | 57.9784605  | 99.99822825 |
| S_SK_1   | S  | SK  | 950  | 5  | 16  | 34.71418707 | 99.98798354 |
| S_SK_2   | S  | SK  | 2002 | 12 | 35  | 18.94529601 | 99.98731726 |
| S_SK_3   | S  | SK  | 1743 | 7  | 35  | 308.760236  | 99.98849956 |
| S_SK_4   | S  | SK  | 1134 | 4  | 12  | 219.9309371 | 99.98974744 |
| S_SK_5   | S  | SK  | 1703 | 7  | 40  | 202.1880481 | 99.98821482 |
| S_TKP_1  | S  | TKP | 401  | 0  | 8   | 16.86696092 | 100         |
| S_TKP_2  | S  | TKP | 456  | 0  | 3   | 11.24043437 | 100         |
| S_TKP_3  | S  | TKP | 1259 | 3  | 25  | 28.43293575 | 99.99566746 |
| S_TKP_4  | S  | TKP | 983  | 0  | 2   | 9.856846746 | 100         |
| S_TKP_5  | S  | TKP | 1202 | 2  | 21  | 12.03280726 | 99.99717502 |
| W_SH_1   | W  | SH  | 799  | 0  | 7   | 127.2805405 | 100         |
| W_SH_2   | W  | SH  | 1205 | 0  | 7   | 151.0226808 | 100         |
| W_SH_3   | W  | SH  | 1210 | 6  | 0   | 158.1309967 | 99.98779476 |
| W_SH_4   | W  | SH  | 373  | 0  | 29  | 24.56079362 | 100         |
| W_SH_5   | W  | SH  | 680  | 0  | 30  | 75.90200743 | 100         |
| W_SK_1   | W  | SK  | 761  | 1  | 16  | 19.43223473 | 99.99784419 |
| W_SK_2   | W  | SK  | 592  | 0  | 0   | 22.84512791 | 100         |
| W_SK_3   | W  | SK  | 195  | 0  | 0   | 3.204749823 | 100         |
| W_SK_4   | W  | SK  | 3567 | 23 | 267 | 244.8521176 | 99.98340367 |
| W_SK_5   | W  | SK  | 484  | 0  | 0   | 25.76002911 | 100         |
| W_TKP_1  | W  | TKP | 741  | 0  | 3   | 16.6556518  | 100         |
| W_TKP_2  | W  | TKP | 1498 | 2  | 0   | 98.99462578 | 99.99725314 |
| W_TKP_3  | W  | TKP | 3390 | 8  | 208 | 45.38607668 | 99.99764277 |
| W_TKP_4  | W  | TKP | 573  | 0  | 1   | 63.13150886 | 100         |
| W_TKP_5  | W  | TKP | 1755 | 33 | 64  | 45.41702799 | 99.99296514 |
| WD_SH_1  | WD | SH  | 470  | 0  | 4   | 21.81797564 | 100         |
| WD_SH_2  | WD | SH  | 524  | 3  | 6   | 26.24533418 | 99.99210661 |
| WD_SH_3  | WD | SH  | 775  | 3  | 11  | 22.17023698 | 99.99359646 |
| WD_SH_4  | WD | SH  | 405  | 1  | 5   | 16.8986672  | 99.99730084 |
| WD_SH_5  | WD | SH  | 337  | 0  | 3   | 7.774626473 | 100         |
| WD_SK_1  | WD | SK  | 1739 | 5  | 130 | 79.2014175  | 99.99308103 |
| WD_SK_2  | WD | SK  | 1948 | 8  | 103 | 290.4342669 | 99.98775157 |
| WD_SK_3  | WD | SK  | 1157 | 0  | 5   | 31.33554017 | 100         |
| WD_SK_4  | WD | SK  | 3353 | 16 | 212 | 347.3035972 | 99.98717574 |
| WD_SK_5  | WD | SK  | 664  | 0  | 5   | 17.20298842 | 100         |
| WD_TKP_1 | WD | TKP | 2501 | 9  | 164 | 370.3107527 | 99.99000447 |
| WD_TKP_2 | WD | TKP | 3123 | 14 | 236 | 385.8381324 | 99.98890488 |
| WD_TKP_3 | WD | TKP | 3377 | 30 | 184 | 226.7327169 | 99.97729126 |
| WD_TKP_4 | WD | TKP | 1411 | 5  | 0   | 74.08000193 | 99.99072005 |
| WD_TKP_5 | WD | TKP | 1412 | 7  | 0   | 100.2788867 | 99.98763874 |

Table S4: Wilcoxon test on alpha diversity. Results of pairwise Wilcoxon test on crab's organs and environmental samples. P-values were corrected by using the "Benjamini-Hochberg" method also known as "False Discovery Rate" (FDR). Target, the target used for metabarcoding analyses; Type, the type of samples (if crab's organs and environmental samples or sampling sites); Group 1, the first group tested; Group 2, the second group tested; Q-value, the adjusted P-value.

| Target | Type         | Group 1 | Group 2 | Q-value | Sign |
|--------|--------------|---------|---------|---------|------|
| 16S    | Sample types | WD      | S       | 0.598   |      |
|        |              | GI      | S       | 0.008   | **   |
|        |              | W       | S       | 0.033   | *    |
|        |              | L       | S       | 0.004   | **   |
|        |              | HG      | S       | 0.000   | **   |
|        |              | MG      | S       | 0.000   | **   |
|        |              | GO      | S       | 0.000   | **   |
|        |              | GI      | WD      | 0.110   |      |
|        |              | W       | WD      | 0.152   |      |
|        |              | L       | WD      | 0.072   |      |
|        |              | HG      | WD      | 0.012   | *    |
|        |              | MG      | WD      | 0.012   | *    |
|        |              | GO      | WD      | 0.000   | **   |
|        |              | W       | GI      | 0.110   |      |
|        |              | L       | GI      | 0.464   |      |
|        |              | HG      | GI      | 0.776   |      |
|        |              | MG      | GI      | 0.776   |      |
|        |              | GO      | GI      | 0.000   | **   |
|        |              | L       | W       | 0.135   |      |
|        |              | HG      | W       | 0.001   | **   |
|        |              | MG      | W       | 0.000   | **   |
|        |              | GO      | W       | 0.000   | **   |
|        |              | HG      | L       | 0.100   |      |
|        |              | MG      | L       | 0.025   | *    |
|        |              | GO      | L       | 0.000   | **   |
|        |              | MG      | HG      | 0.788   |      |
|        |              | GO      | HG      | 0.000   | **   |
| GO     | MG           | 0.000   | **      |         |      |
| 16S    | Sites        | SK      | SH      | 0.930   |      |
|        |              | TKP     | SH      | 0.930   |      |
|        |              | TKP     | SK      | 0.930   |      |
| ITS    | Sample types | W       | S       | 0.789   |      |
|        |              | WD      | S       | 0.476   |      |
|        |              | L       | S       | 0.124   |      |
|        |              | MG      | S       | 0.002   | **   |
|        |              | HG      | S       | 0.002   | **   |

|       |     |    |          |
|-------|-----|----|----------|
|       | GI  | S  | 0.002 ** |
|       | GO  | S  | 0.002 ** |
|       | WD  | W  | 0.482    |
|       | L   | W  | 0.138    |
|       | MG  | W  | 0.006 ** |
|       | HG  | W  | 0.006 ** |
|       | GI  | W  | 0.003 ** |
|       | GO  | W  | 0.003 ** |
|       | L   | WD | 0.293    |
|       | MG  | WD | 0.002 ** |
|       | HG  | WD | 0.002 ** |
|       | GI  | WD | 0.002 ** |
|       | GO  | WD | 0.001 ** |
|       | MG  | L  | 0.124    |
|       | HG  | L  | 0.124    |
|       | GI  | L  | 0.062    |
|       | GO  | L  | 0.053    |
|       | HG  | MG | 0.974    |
|       | GI  | MG | 0.739    |
|       | GO  | MG | 0.713    |
|       | GI  | HG | 0.789    |
|       | GO  | HG | 0.696    |
|       | GO  | GI | 0.907    |
| Sites | SK  | SH | 0.539    |
|       | TKP | SH | 0.030 *  |
|       | TKP | SK | 0.049 *  |

---

**Table S5: Variance explained by crab, sample type, and sampling site with permutational multivariate analysis of variance (PERMANOVA).** The variance explained by each factor (also called R squared) was reported separately for 16S and ITS1 amplicons. The type columns reports if the PERMANOVA was computed on crab's samples (midgut, hindgut, gills, and gonads) or on environmental samples (litter, soil, water, and water debris). The crab was included in the model to account for variability across different animals collected. Asterisks were used to report significance based on p-values (\*, p-value < 0.05; \*\* p-value < 0.01). The proportion of variance unexplained by the factor considered was reported in the Residual column.

| Amplicon | Type                  | Crab    | Sample Type | Site    | Residual |
|----------|-----------------------|---------|-------------|---------|----------|
| 16S      | Crab's organs         | 0.203** | 0.260**     | 0.043** | 0.494    |
|          | Environmental samples | -       | 0.160**     | 0.088** | 0.752    |
| ITS      | Crab's organs         | 0.226   | 0.053**     | 0.055** | 0.666    |
|          | Environmental samples | -       | 0.174**     | 0.132** | 0.694    |

**Table S6: Analysis of variance (ANOVA) on euclidean distances around centroids.** The homogeneity of dispersion across groups was tested using ANOVA on euclidean distances from group centroids. P-values were reported in the table using asterisks to report statistical significance (\*, p-value < 0.05; \*\* p-value < 0.01).

| Amplicon | Type                  | Sample Type | Site   |
|----------|-----------------------|-------------|--------|
| 16S      | Crab's organs         | 0.672       | 0.012* |
|          | Environmental samples | 0.206       | 0.979  |
| ITS      | Crab's organs         | 0.067       | 0.024* |
|          | Environmental samples | 0.087       | 0.479  |

**Table S7: Results of the likelihood ratio test (LRT) on sequence variants in different sample types.**

All columns returned from the LRT were reported even if the “log2FoldChange” column is not representative of a given contrast in this type of test. Columns are: asv, the name of the ASV tested; baseMean, the mean overall abundance of the each ASV tested; log2FoldChange, the logarithm of the ratio between two levels of the factor considered (since in LRT no contrast is provided, this column is not directly associated with the actual hypothesis test); lfcSE, the standard error of the log2FoldChange; stat, the difference in deviance between the reduced model and the full model; pvalue, the pvalue obtained by comparing stat to a chi-squared distribution; padj, adjusted p-values using the Benjamini–Hochberg method.

| asv        | baseMean    | log2FoldChange | lfcSE       | stat        | pvalue      | padj        |
|------------|-------------|----------------|-------------|-------------|-------------|-------------|
| ASV_16s_1  | 4193.925376 | 0.291294328    | 0.700618258 | 122.634551  | 2.16E-23    | 4.03E-21    |
| ASV_16s_2  | 2974.042659 | 1.607565663    | 0.550839046 | 189.5774702 | 1.84E-37    | 2.23E-34    |
| ASV_16s_3  | 2070.721697 | 0.018198732    | 0.684138918 | 135.0956634 | 5.41E-26    | 1.19E-23    |
| ASV_16s_4  | 1782.252285 | 0.268915547    | 0.563220198 | 234.0417475 | 6.87E-47    | 1.66E-43    |
| ASV_16s_5  | 2000.777163 | 0.003280727    | 0.720204251 | 143.0129591 | 1.19E-27    | 4.79E-25    |
| ASV_16s_6  | 1323.431652 | 1.237259215    | 0.780931039 | 137.8100229 | 1.46E-26    | 3.93E-24    |
| ASV_16s_7  | 1167.835274 | 2.774387931    | 0.665632684 | 179.9703419 | 1.98E-35    | 1.59E-32    |
| ASV_16s_8  | 1085.69007  | -0.675968088   | 0.799376444 | 95.86037298 | 7.71E-18    | 8.11E-16    |
| ASV_16s_9  | 935.4725098 | 0.9077719      | 0.867358202 | 105.7160025 | 7.09E-20    | 1.07E-17    |
| ASV_16s_10 | 794.9096287 | 2.404929393    | 0.693879963 | 140.8050448 | 3.45E-27    | 1.04E-24    |
| ASV_16s_11 | 470.2334213 | 1.874036395    | 0.754795379 | 167.1691431 | 9.92E-33    | 6.00E-30    |
| ASV_16s_12 | 377.7578079 | 1.23638359     | 0.807675489 | 73.56362708 | 2.81E-13    | 2.00E-11    |
| ASV_16s_13 | 440.4518065 | 0.118524009    | 0.733370371 | 141.0183516 | 3.11E-27    | 1.04E-24    |
| ASV_16s_14 | 433.9113438 | 5.917177117    | 0.817305923 | 41.03165421 | 7.98E-07    | 1.95E-05    |
| ASV_16s_15 | 310.0818619 | 3.734246693    | 0.914789155 | 57.08347738 | 5.75E-10    | 2.32E-08    |
| ASV_16s_16 | 378.197037  | 13.42414978    | 1.265589317 | 39.0576093  | 1.91E-06    | 4.31E-05    |
| ASV_16s_17 | 479.0655672 | 2.404718759    | 0.94987472  | 75.94560532 | 9.21E-14    | 6.97E-12    |
| ASV_16s_18 | 343.9012014 | -0.4235691     | 0.862188286 | 111.0950016 | 5.44E-21    | 8.78E-19    |
| ASV_16s_19 | 312.6063985 | -5.018168812   | 0.95597808  | 65.28624478 | 1.32E-11    | 6.64E-10    |
| ASV_16s_20 | 356.6465872 | 2.463998378    | 1.033193824 | 70.28455046 | 1.29E-12    | 7.83E-11    |
| ASV_16s_21 | 297.9990391 | 2.069708084    | 0.920340511 | 87.7189494  | 3.64E-16    | 3.39E-14    |
| ASV_16s_22 | 338.083022  | -1.044090365   | 1.405334982 | 34.62703278 | NA          | NA          |
| ASV_16s_23 | 229.6771001 | 0.94216184     | 0.871603846 | 67.89718994 | 3.93E-12    | 2.16E-10    |
| ASV_16s_24 | 222.5022874 | 0.606809962    | 0.914264128 | 98.58186075 | 2.12E-18    | 2.44E-16    |
| ASV_16s_25 | 180.8966598 | 1.616592344    | 0.973085154 | 71.98224842 | 5.87E-13    | 3.74E-11    |
| ASV_16s_26 | 288.5115396 | 2.652946229    | 0.979885216 | 71.18018631 | 8.53E-13    | 5.29E-11    |
| ASV_16s_27 | 292.1742582 | -8.347071537   | 1.491711254 | 28.65794008 | 1.67E-04    | 0.002511345 |
| ASV_16s_28 | 269.6337811 | 0.644903033    | 1.882991064 | 39.746861   | 1.41E-06    | 3.31E-05    |
| ASV_16s_29 | 197.8823357 | 0.557676563    | 0.91310122  | 55.98127401 | 9.53E-10    | 3.66E-08    |
| ASV_16s_30 | 195.4341619 | -0.384343988   | 1.628639698 | 47.23127818 | 5.03E-08    | 1.45E-06    |
| ASV_16s_31 | 265.9280636 | -6.572505705   | 1.816483764 | 39.40184163 | 1.64E-06    | 3.78E-05    |
| ASV_16s_32 | 281.3461091 | 2.858447537    | 0.842539248 | 102.2033073 | 3.78E-19    | 5.09E-17    |
| ASV_16s_33 | 184.264651  | 1.306883617    | 0.959242501 | 76.41421672 | 7.40E-14    | 5.97E-12    |
| ASV_16s_34 | 240.7294395 | -0.570695193   | 0.911732757 | 96.52005594 | 5.64E-18    | 6.20E-16    |
| ASV_16s_35 | 149.5418473 | 4.192684173    | 0.815160795 | 88.25709475 | 2.82E-16    | 2.73E-14    |
| ASV_16s_36 | 67.4682983  | -12.96087257   | 3.54988791  | 8.175642694 | 0.31736114  | 1           |
| ASV_16s_37 | 173.8750968 | 4.281099471    | 1.142427188 | 39.26964351 | 1.74E-06    | 3.97E-05    |
| ASV_16s_38 | 248.7349105 | 12.68042642    | 1.471647987 | 22.85944806 | 0.001803368 | 0.02040165  |
| ASV_16s_39 | 275.3205525 | 2.144720981    | 0.979277728 | 85.25968652 | 1.16E-15    | 1.04E-13    |
| ASV_16s_40 | 187.8488015 | -2.811699731   | 1.258413702 | 50.07645311 | 1.40E-08    | 4.50E-07    |
| ASV_16s_41 | 207.852463  | -0.448069366   | 0.749085764 | 137.1285394 | 2.03E-26    | 4.91E-24    |
| ASV_16s_42 | 233.8042313 | 2.187597109    | 0.680072201 | 123.5806343 | 1.37E-23    | 2.77E-21    |
| ASV_16s_43 | 153.472643  | 4.193987517    | 0.773789611 | 56.5805242  | 7.24E-10    | 2.83E-08    |
| ASV_16s_44 | 217.788306  | -5.790611713   | 3.549643256 | 4.051361452 | NA          | NA          |
| ASV_16s_45 | 166.9370268 | 2.479680722    | 0.5830744   | 101.901205  | 4.37E-19    | 5.56E-17    |
| ASV_16s_46 | 151.0153322 | 6.031212634    | 1.068070647 | 48.73032324 | 2.56E-08    | 8.06E-07    |
| ASV_16s_47 | 117.0885388 | 1.355793902    | 0.884052983 | 59.95810809 | 1.54E-10    | 6.77E-09    |
| ASV_16s_48 | 222.9749782 | 7.425079606    | 1.161707537 | 76.23227515 | 8.06E-14    | 6.29E-12    |
| ASV_16s_49 | 220.2448575 | -3.491914225   | 1.251135679 | 45.28291075 | NA          | NA          |
| ASV_16s_50 | 133.8619021 | 7.347607908    | 1.043220841 | 51.60345035 | 6.99E-09    | 2.45E-07    |
| ASV_16s_51 | 140.7222212 | 2.927129385    | 0.679926219 | 66.96083269 | 6.06E-12    | 3.26E-10    |
| ASV_16s_52 | 159.0278817 | 1.966066687    | 1.151776554 | 46.66698083 | 6.48E-08    | 1.80E-06    |
| ASV_16s_53 | 165.531134  | -7.903593784   | 1.800053254 | 19.45861289 | 0.006865807 | 0.061563401 |
| ASV_16s_54 | 150.6245856 | 0.40706154     | 2.106616406 | 28.77836453 | 1.59E-04    | 0.002402654 |
| ASV_16s_55 | 42.10738035 | -0.336746521   | 3.550717738 | 7.540663116 | 0.374832165 | 1           |
| ASV_16s_56 | 163.1414911 | 8.689392718    | 1.236345508 | 34.51259801 | 1.38E-05    | 2.79E-04    |
| ASV_16s_57 | 148.3510771 | -3.986332352   | 1.519578076 | 32.68599169 | 3.03E-05    | 5.60E-04    |
| ASV_16s_58 | 159.7859853 | 1.635214469    | 0.838248011 | 72.22373256 | 5.24E-13    | 3.43E-11    |
| ASV_16s_59 | 73.35437056 | 0.177603944    | 2.37341622  | 6.91752804  | NA          | NA          |
| ASV_16s_60 | 98.18216444 | 1.602844453    | 0.950233449 | 62.83914621 | 4.08E-11    | 1.90E-09    |
| ASV_16s_61 | 99.9562784  | 3.392880625    | 0.931178446 | 61.66422693 | 7.02E-11    | 3.15E-09    |
| ASV_16s_62 | 80.58139714 | 4.290745369    | 1.445313243 | 24.17516775 | 0.001061316 | 0.012595328 |
| ASV_16s_63 | 114.5930605 | 1.484599422    | 0.778857506 | 64.38954146 | 1.99E-11    | 9.85E-10    |
| ASV_16s_64 | 85.74149799 | 3.408466288    | 1.16440725  | 33.1951178  | 2.43E-05    | 4.64E-04    |
| ASV_16s_65 | 115.813847  | -5.871187606   | 1.526312969 | 34.6244741  | 1.32E-05    | 2.68E-04    |
| ASV_16s_66 | 30.43471246 | -2.01565948    | 2.976732894 | 9.116256966 | 0.24441673  | 0.961181421 |



|             |             |              |             |             |             |    |             |
|-------------|-------------|--------------|-------------|-------------|-------------|----|-------------|
| ASV_16s_67  | 65.7103055  | -6.102988615 | 2.498662071 | 8.533780635 | NA          | NA |             |
| ASV_16s_68  | 133.4604682 | 11.24303777  | 1.05876325  | 45.59858409 | 1.05E-07    |    | 2.85E-06    |
| ASV_16s_69  | 27.83351883 | -7.484669527 | 3.550697117 | 7.842848058 | 0.346655308 |    | 1           |
| ASV_16s_70  | 128.2235943 | 2.593552636  | 1.356723396 | 39.46351692 | 1.59E-06    |    | 3.71E-05    |
| ASV_16s_71  | 29.89637842 | -6.990308832 | 3.550389835 | 7.305537665 | 0.397775538 |    | 1           |
| ASV_16s_72  | 81.76448706 | -1.632456789 | 1.587601029 | 23.61995465 | 0.001328445 |    | 0.015612394 |
| ASV_16s_73  | 111.5017579 | 0.427251229  | 1.06343681  | 50.64262612 | 1.08E-08    |    | 3.58E-07    |
| ASV_16s_74  | 107.167734  | 1.504323746  | 0.870345407 | 25.86568759 | 5.32E-04    |    | 0.007159013 |
| ASV_16s_75  | 16.93858428 | -27.53545452 | 3.551437631 | 3.304981645 | 0.855429351 |    | 1           |
| ASV_16s_76  | 97.21177708 | 4.135766     | 1.594041111 | 20.09555013 | 0.005366953 |    | 0.051561082 |
| ASV_16s_77  | 114.7470113 | -0.407345545 | 1.643281124 | 45.96074245 | 8.90E-08    |    | 2.45E-06    |
| ASV_16s_78  | 82.02671683 | 10.04949116  | 1.52362038  | 22.34341696 | 0.002216132 |    | 0.024498889 |
| ASV_16s_79  | 109.1089527 | -3.60429205  | 0.930052398 | 68.35340932 | 3.18E-12    |    | 1.79E-10    |
| ASV_16s_80  | 28.29874765 | -4.686865151 | 3.550725889 | 7.352250232 | 0.393147481 |    | 1           |
| ASV_16s_81  | 91.58333077 | 0.393333527  | 1.044968485 | 41.47656938 | 6.56E-07    |    | 1.65E-05    |
| ASV_16s_82  | 93.43312519 | 8.260628265  | 2.18499804  | 13.0435773  | 0.07105373  |    | 0.41279216  |
| ASV_16s_83  | 37.38652435 | 17.080293    | 3.551437934 | 3.510370922 | 0.834125788 |    | 1           |
| ASV_16s_84  | 77.20334925 | 2.991057798  | 0.958560047 | 56.94799322 | 6.12E-10    |    | 2.43E-08    |
| ASV_16s_85  | 111.5353199 | 2.063086655  | 0.883793264 | 72.62811075 | 4.34E-13    |    | 2.92E-11    |
| ASV_16s_86  | 90.4001389  | -1.434955437 | 1.254803013 | 48.82969657 | 2.45E-08    |    | 7.80E-07    |
| ASV_16s_87  | 79.42747318 | 1.778052407  | 1.067305748 | 28.9369814  | 1.49E-04    |    | 0.002276439 |
| ASV_16s_88  | 72.1037424  | 6.773978863  | 1.303647779 | 33.88489881 | 1.81E-05    |    | 3.54E-04    |
| ASV_16s_89  | 30.40980122 | 20.05977569  | 3.551437771 | 3.555424529 | 0.82932059  |    | 1           |
| ASV_16s_90  | 109.8628954 | 3.836448697  | 1.096335304 | 59.31736556 | 2.07E-10    |    | 8.62E-09    |
| ASV_16s_91  | 21.1111176  | -27.47572807 | 3.551437607 | 3.440301482 | NA          | NA |             |
| ASV_16s_92  | 20.48298897 | -4.191057005 | 3.550721815 | 7.120495645 | 0.416442758 |    | 1           |
| ASV_16s_93  | 93.99801464 | 1.140688173  | 1.890473831 | 30.42683389 | 7.93E-05    |    | 0.001332869 |
| ASV_16s_94  | 107.5379097 | 1.739502028  | 1.189663464 | 68.90567438 | 2.46E-12    |    | 1.45E-10    |
| ASV_16s_95  | 22.17799641 | 7.194320456  | 3.550315442 | 7.399417172 | 0.388509366 |    | 1           |
| ASV_16s_96  | 67.39989913 | 0.823300349  | 0.865712128 | 25.90532598 | 5.24E-04    |    | 0.00712245  |
| ASV_16s_97  | 68.57268716 | -2.279235056 | 0.958524828 | 62.54720151 | 4.67E-11    |    | 2.13E-09    |
| ASV_16s_98  | 94.0539742  | 4.70179665   | 1.104496552 | 59.83161134 | 1.63E-10    |    | 7.05E-09    |
| ASV_16s_99  | 29.26373194 | -4.360649179 | 3.549673578 | 5.662552722 | 0.579656174 |    | 1           |
| ASV_16s_100 | 30.26480261 | 20.09050601  | 3.551287035 | 3.487630521 | 0.836533903 |    | 1           |
| ASV_16s_101 | 77.95981565 | 1.791002212  | 1.126587995 | 47.42442672 | 4.61E-08    |    | 1.35E-06    |
| ASV_16s_102 | 20.57948985 | -3.65798922  | 3.550719407 | 7.325390684 | 0.3958044   |    | 1           |
| ASV_16s_103 | 67.12996012 | -10.99818157 | 2.783950994 | 5.432688392 | 0.607314851 |    | 1           |
| ASV_16s_104 | 17.30994291 | -27.0599505  | 3.551437629 | 3.318306439 | 0.854078916 |    | 1           |
| ASV_16s_105 | 16.39034989 | -26.98326386 | 3.551437644 | 5.164107672 | 0.639944121 |    | 1           |
| ASV_16s_106 | 61.28641363 | 7.033517492  | 1.267062552 | 34.92481249 | 1.16E-05    |    | 2.37E-04    |
| ASV_16s_107 | 61.05185033 | 7.104062059  | 1.090280822 | 32.10803379 | 3.88E-05    |    | 7.01E-04    |
| ASV_16s_108 | 104.8974794 | -9.597065212 | 1.775222365 | 17.06667699 | 0.016971259 |    | 0.132113882 |
| ASV_16s_109 | 58.08696383 | 7.352397312  | 1.567213815 | 22.003465   | 0.002536922 |    | 0.027791351 |
| ASV_16s_110 | 85.33703806 | 2.957816653  | 1.043287938 | 59.20674382 | 2.17E-10    |    | 8.92E-09    |
| ASV_16s_111 | 17.12773712 | -9.27547804  | 3.550526627 | 6.717388523 | 0.45888636  |    | 1           |
| ASV_16s_112 | 63.70541371 | -3.180971597 | 1.150315376 | 19.98158193 | 0.005609603 |    | 0.053258234 |
| ASV_16s_113 | 56.5305513  | -2.742606687 | 0.958298679 | 45.21595635 | 1.24E-07    |    | 3.34E-06    |
| ASV_16s_114 | 80.69741301 | 2.412936081  | 1.228585978 | 44.11270184 | 2.03E-07    |    | 5.35E-06    |
| ASV_16s_115 | 102.850309  | 29.99526575  | 3.549019801 | 3.222633773 | 0.863671408 |    | 1           |
| ASV_16s_116 | 68.98098302 | 8.209652475  | 1.056094592 | 19.185953   | 0.007624352 |    | 0.0661597   |
| ASV_16s_117 | 80.88724665 | 2.770854003  | 1.076244891 | 43.22544231 | 3.02E-07    |    | 7.85E-06    |
| ASV_16s_118 | 15.654311   | -1.488475869 | 3.54952693  | 5.36021814  | 0.616093278 |    | 1           |
| ASV_16s_119 | 44.44723289 | -1.018499291 | 0.901732082 | 51.61702892 | 6.95E-09    |    | 2.45E-07    |
| ASV_16s_120 | 43.98575402 | 1.502818912  | 1.195349907 | 33.88376239 | 1.81E-05    |    | 3.54E-04    |
| ASV_16s_121 | 57.22749602 | 2.914659975  | 0.970591873 | 19.70285304 | 0.006248574 |    | 0.057420468 |
| ASV_16s_122 | 21.76350293 | 19.86681196  | 3.551437872 | 3.350438811 | 0.850803669 |    | 1           |
| ASV_16s_123 | 69.24052707 | 1.160676674  | 2.050061117 | 25.64714441 | 5.82E-04    |    | 0.007702826 |
| ASV_16s_124 | 73.01152389 | 4.724358818  | 1.397373848 | 42.40485116 | 4.35E-07    |    | 1.11E-05    |
| ASV_16s_125 | 16.00069785 | 6.051928199  | 3.548569425 | 3.671930407 | 0.816693536 |    | 1           |
| ASV_16s_126 | 50.38351944 | -2.432512986 | 1.734187275 | 2.995195182 | 0.88544636  |    | 1           |
| ASV_16s_127 | 59.19475968 | 1.645639128  | 1.441499609 | 31.48780338 | 5.05E-05    |    | 8.93E-04    |
| ASV_16s_128 | 70.4946555  | 0.183566143  | 1.423285797 | 42.4676526  | 4.23E-07    |    | 1.09E-05    |
| ASV_16s_129 | 18.02817827 | -1.175289816 | 3.548574077 | 6.532800054 | 0.47908661  |    | 1           |
| ASV_16s_130 | 59.39612014 | 20.37481652  | 3.549342419 | 3.847568926 | 0.797157651 |    | 1           |
| ASV_16s_131 | 49.33553492 | 2.79829905   | 1.149224315 | 24.53326732 | 9.18E-04    |    | 0.011164744 |
| ASV_16s_132 | 64.10944263 | -2.600862223 | 1.128431232 | 48.63465091 | 2.68E-08    |    | 8.30E-07    |
| ASV_16s_133 | 16.24804818 | -8.865835837 | 3.550189354 | 7.002773409 | 0.428591148 |    | 1           |

|             |             |              |             |             |             |             |
|-------------|-------------|--------------|-------------|-------------|-------------|-------------|
| ASV_16s_134 | 40.20439879 | 1.121563661  | 1.053096194 | 50.52808561 | 1.14E-08    | 3.72E-07    |
| ASV_16s_135 | 14.98079097 | -5.990677459 | 3.550797991 | 5.84197687  | 0.558317525 | 1           |
| ASV_16s_136 | 69.38222663 | -6.803384219 | 2.192018115 | 9.238048315 | 0.236014052 | 0.949152858 |
| ASV_16s_137 | 19.32280795 | 23.89709886  | 3.550720051 | 2.470084991 | 0.929332798 | 1           |
| ASV_16s_138 | 59.76363759 | -6.335974482 | 2.690689045 | 6.603667367 | 0.471277376 | 1           |
| ASV_16s_139 | 16.51971401 | -15.24604755 | 3.548805158 | 5.473425765 | 0.602391134 | 1           |
| ASV_16s_140 | 18.60105252 | 10.47189019  | 3.550867719 | 3.368306634 | NA          | NA          |
| ASV_16s_141 | 35.70302087 | -1.864715176 | 1.108654854 | 10.49105352 | 0.162411081 | 0.72839759  |
| ASV_16s_142 | 65.07565608 | -5.885500734 | 3.546123185 | 2.499073219 | NA          | NA          |
| ASV_16s_143 | 43.81454322 | -16.21985506 | 2.320694943 | 11.56931859 | 0.115641561 | 0.574017711 |
| ASV_16s_144 | 18.25429078 | 19.76708533  | 3.551437939 | 3.242667542 | NA          | NA          |
| ASV_16s_145 | 54.23435003 | 0.330125657  | 1.384971132 | 20.22922299 | 0.005095275 | 0.049540807 |
| ASV_16s_146 | 56.83395646 | 0.901023934  | 1.96461295  | 25.3178077  | 6.66E-04    | 0.008535888 |
| ASV_16s_147 | 83.79446315 | -10.77989346 | 3.149453316 | 5.256508548 | NA          | NA          |
| ASV_16s_148 | 16.98805889 | 28.3110158   | 3.5513614   | 2.684486003 | NA          | NA          |
| ASV_16s_149 | 20.24915135 | 10.3910371   | 3.550847318 | 3.437127332 | 0.841839335 | 1           |
| ASV_16s_150 | 59.13065404 | 3.42229588   | 0.91632392  | 52.60611001 | 4.43E-09    | 1.63E-07    |
| ASV_16s_151 | 46.30363044 | 3.438297314  | 0.836999092 | 104.4722701 | 1.28E-19    | 1.83E-17    |
| ASV_16s_152 | 41.41355643 | 11.20840314  | 1.366248535 | 30.0600654  | 9.26E-05    | 0.00150428  |
| ASV_16s_153 | 12.22631124 | 6.319774065  | 3.550542113 | 6.156089548 | 0.521646567 | 1           |
| ASV_16s_154 | 25.75854943 | -8.35618173  | 3.074072753 | 2.170907373 | 0.949778358 | 1           |
| ASV_16s_155 | 12.04089214 | -25.98833559 | 3.551437943 | 5.007086886 | 0.659098336 | 1           |
| ASV_16s_156 | 40.30740792 | 7.986927331  | 1.194749033 | 36.11115818 | 6.91E-06    | 1.44E-04    |
| ASV_16s_157 | 16.73684108 | 19.71184106  | 3.551437973 | 3.283142685 | 0.857632695 | 1           |
| ASV_16s_158 | 12.42601391 | -9.852224567 | 3.550681139 | 5.559294393 | 0.592041814 | 1           |
| ASV_16s_159 | 34.68604283 | 2.094278941  | 1.19950027  | 20.6412088  | 0.004339108 | 0.043053195 |
| ASV_16s_160 | 39.43771886 | -0.2975863   | 1.386069125 | 22.74483796 | 0.001888011 | 0.021259883 |
| ASV_16s_161 | 26.47551578 | -5.553902368 | 3.547624464 | 3.923121185 | NA          | NA          |
| ASV_16s_162 | 33.78882528 | 1.017921732  | 0.899794225 | 41.30148255 | 7.09E-07    | 1.75E-05    |
| ASV_16s_163 | 37.64887174 | 0.338221871  | 1.028496769 | 59.628229   | 1.79E-10    | 7.61E-09    |
| ASV_16s_164 | 59.77740441 | -30          | 3.546714059 | 3.427728718 | NA          | NA          |
| ASV_16s_165 | 33.62520054 | 0.205233165  | 0.917896989 | 15.85310867 | 0.026492791 | 0.192609753 |
| ASV_16s_166 | 46.4942745  | 2.623011321  | 2.654305835 | 8.103787567 | 0.323531107 | 1           |
| ASV_16s_167 | 42.07164078 | -14.95867274 | 2.899519023 | 3.153008013 | 0.870496092 | 1           |
| ASV_16s_168 | 11.32953876 | -2.78830189  | 3.550719903 | 6.52332543  | 0.480135647 | 1           |
| ASV_16s_169 | 34.42785375 | 0.507576509  | 0.864642446 | 21.94939182 | 0.00259195  | 0.028266263 |
| ASV_16s_170 | 13.42438182 | -3.882120265 | 3.004893901 | 7.232533304 | 0.405076942 | 1           |
| ASV_16s_171 | 40.42797346 | 1.826365728  | 1.005028708 | 37.17088366 | 4.35E-06    | 9.41E-05    |
| ASV_16s_172 | 31.75492066 | -2.921117029 | 0.941711931 | 19.9400719  | 0.005700591 | 0.053700901 |
| ASV_16s_173 | 56.29704818 | 2.23076722   | 1.142934352 | 68.60819078 | 2.82E-12    | 1.63E-10    |
| ASV_16s_174 | 40.69965498 | 0.294192241  | 0.884597297 | 40.16566213 | 1.17E-06    | 2.80E-05    |
| ASV_16s_175 | 45.30437603 | -0.648464089 | 1.857443335 | 26.01242962 | 5.01E-04    | 0.006854021 |
| ASV_16s_176 | 41.67030513 | 0.456443486  | 1.31214324  | 48.05988569 | 3.47E-08    | 1.04E-06    |
| ASV_16s_177 | 24.62237513 | 0.643805955  | 1.237504738 | 32.76002098 | 2.93E-05    | 5.46E-04    |
| ASV_16s_178 | 13.03940901 | -5.290153819 | 3.550800379 | 5.501561754 | 0.5989955   | 1           |
| ASV_16s_179 | 32.44382764 | 7.017102783  | 1.375754431 | 24.6397367  | 8.79E-04    | 0.010745517 |
| ASV_16s_180 | 42.10314304 | 0.576170615  | 0.825166298 | 146.556634  | 2.14E-28    | 1.04E-25    |
| ASV_16s_181 | 28.87140255 | 4.451151254  | 1.067288666 | 54.96218276 | 1.52E-09    | 5.74E-08    |
| ASV_16s_182 | 35.56931226 | -5.357922732 | 1.513928116 | 15.09701897 | 0.034775679 | 0.239863019 |
| ASV_16s_183 | 32.63558012 | 7.638178247  | 1.307264465 | 30.45040791 | 7.85E-05    | 0.00132886  |
| ASV_16s_184 | 29.27878925 | 0.315560116  | 1.359724182 | 21.54815606 | 0.003038156 | 0.031704204 |
| ASV_16s_185 | 44.10798651 | 3.463684991  | 1.181502456 | 52.2585466  | 5.19E-09    | 1.88E-07    |
| ASV_16s_186 | 12.99480393 | 19.56241586  | 3.551438104 | 3.03430212  | NA          | NA          |
| ASV_16s_187 | 23.10411114 | 0.158584457  | 2.591395327 | 7.20675875  | 0.407674548 | 1           |
| ASV_16s_188 | 41.445297   | 0.060435951  | 1.145804199 | 63.36774433 | 3.20E-11    | 1.52E-09    |
| ASV_16s_189 | 30.8376768  | 1.349909204  | 0.951811115 | 29.20322062 | 1.33E-04    | 0.002061674 |
| ASV_16s_190 | 33.56021782 | -0.572443995 | 1.112180902 | 31.08253105 | 6.00E-05    | 0.001038126 |
| ASV_16s_191 | 39.90985332 | 0.588309597  | 0.918583031 | 116.092927  | 4.98E-22    | 8.61E-20    |
| ASV_16s_192 | 41.46110906 | 2.367881257  | 2.001788159 | 22.65928231 | 0.00195371  | 0.021897837 |
| ASV_16s_193 | 39.7192056  | 0.35246178   | 1.213788948 | 65.57447437 | 1.15E-11    | 5.94E-10    |
| ASV_16s_194 | 37.51525162 | 0.333151015  | 1.352907032 | 44.22998179 | 1.93E-07    | 5.13E-06    |
| ASV_16s_195 | 10.72050292 | -30          | 3.551334269 | 4.773536185 | 0.687577063 | 1           |
| ASV_16s_196 | 35.10486366 | -1.656964965 | 1.640385232 | 27.58376961 | 2.62E-04    | 0.003791469 |
| ASV_16s_197 | 30.56258361 | 1.410629299  | 1.563505458 | 14.94490663 | 0.036712142 | 0.250366464 |
| ASV_16s_198 | 5.132284278 | -3.533973363 | 3.550076079 | 2.244194251 | NA          | NA          |
| ASV_16s_199 | 10.17874876 | -10.81284307 | 3.550051128 | 5.427860679 | 0.607898895 | 1           |
| ASV_16s_200 | 5.773688431 | -26.22912934 | 3.55143786  | 2.643648199 | 0.915897537 | 1           |

|             |             |              |             |             |             |    |             |
|-------------|-------------|--------------|-------------|-------------|-------------|----|-------------|
| ASV_16s_201 | 45.68375894 | 5.413508261  | 3.546370151 | 5.235116653 | NA          | NA |             |
| ASV_16s_202 | 12.29239621 | 29.81065883  | 3.54970579  | 2.445777225 | NA          | NA |             |
| ASV_16s_203 | 49.68670093 | -1.461863335 | 3.548422697 | 7.082588043 | 0.420331829 |    | 1           |
| ASV_16s_204 | 34.25480931 | -0.885361983 | 0.799880009 | 83.59296878 | 2.54E-15    |    | 2.20E-13    |
| ASV_16s_205 | 21.81317141 | -0.210872244 | 1.636147024 | 10.48991749 | 0.162467864 |    | 0.72839759  |
| ASV_16s_206 | 12.65776699 | -4.659345046 | 3.549783588 | 2.207430426 | 0.947473154 |    | 1           |
| ASV_16s_207 | 9.111474397 | -0.378610242 | 3.546471772 | 2.322884407 | NA          | NA |             |
| ASV_16s_208 | 44.74386522 | 1.38717141   | 2.013803538 | 20.20040766 | 0.00515269  |    | 0.049898653 |
| ASV_16s_209 | 35.09547128 | 6.90716263   | 1.187737169 | 25.83936257 | 5.38E-04    |    | 0.007196899 |
| ASV_16s_210 | 28.18227711 | 10.61170869  | 1.860546199 | 13.93345558 | 0.052377647 |    | 0.329366973 |
| ASV_16s_211 | 24.89727646 | 1.485271632  | 1.388293017 | 28.81158454 | 1.57E-04    |    | 0.002384318 |
| ASV_16s_212 | 8.684936791 | -4.407797532 | 3.550738822 | 5.48901063  | 0.600509726 |    | 1           |
| ASV_16s_213 | 26.15478048 | 10.35977063  | 2.067556479 | 9.426863175 | 0.223443799 |    | 0.915325611 |
| ASV_16s_214 | 30.07483766 | 8.585827035  | 1.622754158 | 19.22311744 | 0.007516396 |    | 0.065693843 |
| ASV_16s_215 | 4.684129143 | -25.9460162  | 3.550202514 | 2.218631628 | NA          | NA |             |
| ASV_16s_216 | 30.19104513 | 0.669066925  | 1.119960399 | 11.69925579 | 0.110892939 |    | 0.556995447 |
| ASV_16s_217 | 34.44209178 | -3.008386164 | 2.052368121 | 14.71541878 | 0.03982535  |    | 0.263434898 |
| ASV_16s_218 | 26.00221413 | -18.81370175 | 2.65572355  | 3.360385901 | NA          | NA |             |
| ASV_16s_219 | 33.94433757 | -6.213482963 | 2.905430373 | 6.681090467 | 0.462822256 |    | 1           |
| ASV_16s_220 | 27.75613586 | 3.675686786  | 1.330005876 | 19.95718589 | 0.005662907 |    | 0.053554286 |
| ASV_16s_221 | 8.262487342 | -29.91446599 | 3.549864035 | 2.077743574 | NA          | NA |             |
| ASV_16s_222 | 37.5829011  | 0.675823081  | 1.658777993 | 30.10760245 | 9.07E-05    |    | 0.001484328 |
| ASV_16s_223 | 8.372561022 | -25.70755465 | 3.551437882 | 4.829171951 | 0.680801033 |    | 1           |
| ASV_16s_224 | 8.673531746 | -8.083820157 | 3.5506244   | 5.931128817 | 0.547813784 |    | 1           |
| ASV_16s_225 | 25.29713947 | 1.570000465  | 1.212327594 | 27.2107635  | 3.05E-04    |    | 0.004374777 |
| ASV_16s_226 | 25.55412277 | 15.09026357  | 3.551236643 | 1.051835011 | 0.993948471 |    | 1           |
| ASV_16s_227 | 18.75297662 | -4.771263439 | 2.052817677 | 8.203617143 | 0.314982189 |    | 1           |
| ASV_16s_228 | 21.17820207 | 1.280858303  | 1.637347522 | 13.06094582 | NA          | NA |             |
| ASV_16s_229 | 25.78881927 | 9.557681555  | 1.40729075  | 21.70924155 | 0.002850697 |    | 0.030133107 |
| ASV_16s_230 | 33.06348801 | 3.751146401  | 1.867223583 | 27.73305614 | 2.46E-04    |    | 0.0036062   |
| ASV_16s_231 | 22.50898518 | 3.739633495  | 1.994264627 | 11.01967059 | 0.137763298 |    | 0.651415906 |
| ASV_16s_232 | 31.30061029 | 22.18532714  | 3.304046271 | 4.396773078 | 0.733109222 |    | 1           |
| ASV_16s_233 | 32.56774451 | 0.600795688  | 1.919549158 | 25.3288253  | 6.63E-04    |    | 0.008535888 |
| ASV_16s_234 | 31.46662278 | 3.353307509  | 1.174136021 | 32.88325568 | 2.78E-05    |    | 5.22E-04    |
| ASV_16s_235 | 23.38862075 | 2.857475879  | 1.746107861 | 12.02795304 | 0.099643357 |    | 0.523289732 |
| ASV_16s_236 | 22.10967401 | -2.385134238 | 1.210356597 | 19.16492214 | 0.007686103 |    | 0.066457344 |
| ASV_16s_237 | 24.27839976 | 1.209914179  | 0.998223009 | 37.482546   | 3.80E-06    |    | 8.29E-05    |
| ASV_16s_238 | 7.668340337 | -24.57153654 | 3.55058036  | 2.518100689 | NA          | NA |             |
| ASV_16s_239 | 22.92013053 | 11.12404494  | 1.925630285 | 12.09919698 | 0.097343552 |    | 0.519090802 |
| ASV_16s_240 | 6.439634604 | 2.94581071   | 2.70522641  | 1.96517617  | 0.961742593 |    | 1           |
| ASV_16s_241 | 27.01603834 | 0.233267238  | 1.303711719 | 19.90524323 | 0.005778033 |    | 0.053990899 |
| ASV_16s_242 | 7.07450506  | 6.749540786  | 3.550713495 | 2.187078901 | NA          | NA |             |
| ASV_16s_243 | 23.72369    | 11.42591723  | 1.577151661 | 16.71522142 | 0.019327711 |    | 0.148547265 |
| ASV_16s_244 | 27.82924367 | 8.195041176  | 1.137894376 | 5.746509377 | 0.569640243 |    | 1           |
| ASV_16s_245 | 28.59358054 | 1.702968825  | 1.188083434 | 36.43351236 | 6.00E-06    |    | 1.26E-04    |
| ASV_16s_246 | 23.35142737 | 0.964350518  | 1.239377245 | 34.22973987 | 1.56E-05    |    | 3.12E-04    |
| ASV_16s_247 | 28.36043204 | 1.284096482  | 1.171455594 | 36.98920014 | 4.71E-06    |    | 1.01E-04    |
| ASV_16s_248 | 30.52121576 | -10.38362608 | 3.202697069 | 7.046662814 | 0.424037583 |    | 1           |
| ASV_16s_249 | 22.50592515 | 10.47245167  | 1.659101498 | 16.61476261 | 0.020056469 |    | 0.153660479 |
| ASV_16s_250 | 4.014660339 | -29.8037477  | 3.550365977 | 1.11213081  | NA          | NA |             |
| ASV_16s_251 | 36.60095503 | -7.474509775 | 3.23663759  | 7.373349886 | NA          | NA |             |
| ASV_16s_252 | 6.876566873 | 0.525387166  | 3.550729129 | 4.73816473  | 0.691880545 |    | 1           |
| ASV_16s_253 | 26.89487212 | 0.055000607  | 1.810454988 | 9.079403275 | 0.247005397 |    | 0.964516234 |
| ASV_16s_254 | 20.61832406 | 9.421804413  | 3.545213187 | 4.316463351 | 0.742690388 |    | 1           |
| ASV_16s_255 | 22.04270368 | 9.411529863  | 1.513650575 | 15.75678343 | 0.027433725 |    | 0.198259845 |
| ASV_16s_256 | 15.68102448 | -3.759727135 | 3.54631868  | 3.638411243 | NA          | NA |             |
| ASV_16s_257 | 31.78737728 | 1.446098828  | 1.473171845 | 33.76451109 | 1.91E-05    |    | 3.69E-04    |
| ASV_16s_258 | 5.95717331  | -25.48355584 | 3.551437917 | 4.139738549 | NA          | NA |             |
| ASV_16s_259 | 24.20847681 | -30          | 3.182252952 | 6.39383653  | 0.494587275 |    | 1           |
| ASV_16s_260 | 27.56407663 | 1.768086862  | 1.012931692 | 32.26159053 | 3.63E-05    |    | 6.61E-04    |
| ASV_16s_261 | 20.71026954 | 0.403452806  | 1.195157562 | 30.23279658 | 8.61E-05    |    | 0.001417389 |
| ASV_16s_262 | 22.3485473  | 0.351735575  | 1.079513077 | 32.99624106 | 2.65E-05    |    | 5.02E-04    |
| ASV_16s_263 | 25.99904857 | 3.792516448  | 0.917897437 | 37.60295923 | 3.60E-06    |    | 7.93E-05    |
| ASV_16s_264 | 24.93432567 | 20.01764209  | 3.549562353 | 3.889635019 | 0.792397999 |    | 1           |
| ASV_16s_265 | 6.43235831  | 2.227437387  | 3.550687285 | 1.911760068 | NA          | NA |             |
| ASV_16s_266 | 40.45744883 | -11.4418624  | 3.548502954 | 3.531048056 | NA          | NA |             |
| ASV_16s_267 | 19.03954258 | 2.288818442  | 1.170657421 | 25.02618136 | 7.51E-04    |    | 0.009501403 |

|             |             |              |             |             |             |             |
|-------------|-------------|--------------|-------------|-------------|-------------|-------------|
| ASV_16s_268 | 20.28924897 | 12.13931468  | 2.129412758 | 8.594180933 | 0.28311938  | 1           |
| ASV_16s_269 | 21.08931631 | 11.22363917  | 1.427237365 | 19.62955898 | 0.00642794  | 0.058327015 |
| ASV_16s_270 | 23.16078378 | 1.686322277  | 1.18101615  | 22.41261661 | 0.002155854 | 0.023941842 |
| ASV_16s_271 | 16.85754406 | 6.770892017  | 1.828207339 | 17.72898637 | 0.01325447  | 0.109146503 |
| ASV_16s_272 | 31.69344354 | 9.044439355  | 2.395222284 | 6.77646912  | 0.452519144 | 1           |
| ASV_16s_273 | 17.14367868 | -3.453550232 | 1.27548411  | 11.80603276 | 0.107120742 | 0.548286079 |
| ASV_16s_274 | 24.3592624  | -3.111828205 | 1.092736702 | 14.48013834 | 0.043271631 | 0.278580897 |
| ASV_16s_275 | 28.87633068 | 2.490759515  | 3.009535153 | 6.143868662 | 0.523054735 | 1           |
| ASV_16s_276 | 30.43094628 | 19.41849134  | 3.550576922 | 3.637918377 | 0.820408781 | 1           |
| ASV_16s_277 | 27.67737665 | 1.04878785   | 2.024153606 | 21.77915086 | 0.002772888 | 0.029443688 |
| ASV_16s_278 | 22.57640392 | 8.422595848  | 1.405394878 | 17.13574722 | 0.016541519 | 0.129989756 |
| ASV_16s_279 | 22.23659684 | 0.740191864  | 1.203796221 | 29.77368767 | 1.04E-04    | 0.001664081 |
| ASV_16s_280 | 19.73118973 | 11.100338    | 1.709505002 | 15.6317617  | 0.028702017 | 0.205584565 |
| ASV_16s_281 | 25.03773257 | 0.335677534  | 2.034593084 | 21.00972307 | 0.003755786 | 0.038366068 |
| ASV_16s_282 | 19.0752775  | 10.11921265  | 1.87384793  | 14.24376243 | 0.047011814 | 0.298728613 |
| ASV_16s_283 | 19.25917513 | 5.762173421  | 1.964448957 | 12.03666243 | 0.099359632 | 0.523289732 |
| ASV_16s_284 | 5.10934035  | -6.941052731 | 3.550864262 | 3.187065043 | 0.867174716 | 1           |
| ASV_16s_285 | 5.975942346 | -25.52097972 | 3.551437849 | 2.66479261  | NA          | NA          |
| ASV_16s_286 | 27.4925237  | 4.915373353  | 1.68065053  | 29.52433825 | 1.16E-04    | 0.001824488 |
| ASV_16s_287 | 9.486350968 | 10.25650294  | 3.546952936 | 1.498575935 | 0.98235892  | 1           |
| ASV_16s_288 | 22.81457032 | -24.51603591 | 2.695013056 | 7.046588925 | 0.424045225 | 1           |
| ASV_16s_289 | 5.641543492 | 0.249847566  | 3.543779383 | 1.136312752 | 0.992320134 | 1           |
| ASV_16s_290 | 24.81468016 | 0.944541063  | 1.754325159 | 29.50395556 | 1.17E-04    | 0.001828345 |
| ASV_16s_291 | 20.72176177 | 1.954258225  | 1.112124274 | 28.46305673 | 1.81E-04    | 0.002708055 |
| ASV_16s_292 | 19.01901864 | 9.946837852  | 1.851200773 | 13.03455144 | 0.071271013 | 0.41279216  |
| ASV_16s_293 | 18.73630152 | 9.112003374  | 2.089684724 | 11.16861304 | 0.131431436 | 0.628844875 |
| ASV_16s_294 | 6.271207975 | -25.04579481 | 3.551438052 | 4.504124996 | NA          | NA          |
| ASV_16s_295 | 16.09333476 | -0.35382509  | 1.443847907 | 11.65657284 | 0.112433439 | 0.562399495 |
| ASV_16s_296 | 18.63233563 | 7.641441729  | 3.54958264  | 3.280815903 | NA          | NA          |
| ASV_16s_297 | 22.23196216 | 1.940725551  | 1.63947159  | 17.38146035 | 0.015095307 | 0.121819129 |
| ASV_16s_298 | 19.18367442 | -14.75926615 | 2.585983118 | 4.962331482 | 0.664560244 | 1           |
| ASV_16s_299 | 14.72755253 | 4.42627486   | 2.101458086 | 9.783222928 | 0.201194471 | 0.847116199 |
| ASV_16s_300 | 15.49020873 | 2.001664744  | 1.237642456 | 25.40365641 | 6.43E-04    | 0.00839082  |
| ASV_16s_301 | 18.01751492 | 10.04917253  | 2.616912869 | 7.374542126 | 0.390951039 | 1           |
| ASV_16s_302 | 23.52904506 | 2.877266461  | 1.480964802 | 20.49321926 | 0.004597291 | 0.045428746 |
| ASV_16s_303 | 4.716171858 | -2.885981606 | 3.549684513 | 2.209936114 | 0.947313025 | 1           |
| ASV_16s_304 | 23.38892395 | 0.063223924  | 1.794224622 | 26.9212841  | 3.44E-04    | 0.004874964 |
| ASV_16s_305 | 5.839496027 | -24.70017553 | 3.550582176 | 2.36772595  | NA          | NA          |
| ASV_16s_306 | 7.516250495 | 19.23357019  | 3.551438507 | 2.698561503 | NA          | NA          |
| ASV_16s_307 | 17.83571883 | 9.888398785  | 2.819154309 | 5.985317423 | 0.54146481  | 1           |
| ASV_16s_308 | 19.6851738  | 1.352421971  | 1.344741076 | 19.9214413  | 0.005741891 | 0.053880303 |
| ASV_16s_309 | 20.97531836 | 2.404636659  | 1.000800112 | 30.52924463 | 7.59E-05    | 0.001294276 |
| ASV_16s_310 | 24.53889445 | 3.914849856  | 1.616168779 | 16.76325561 | 0.018988216 | 0.146402771 |
| ASV_16s_311 | 19.32431695 | 6.497278121  | 1.857252297 | 6.254110161 | 0.510411435 | 1           |
| ASV_16s_312 | 14.77427917 | 2.12212128   | 1.20288299  | 8.681449822 | 0.276342782 | 1           |
| ASV_16s_313 | 17.93802202 | -5.183414789 | 1.378339875 | 10.83221602 | 0.146106969 | 0.676918169 |
| ASV_16s_314 | 22.32176216 | 1.389344915  | 1.206924086 | 25.38567059 | 6.48E-04    | 0.00839082  |
| ASV_16s_315 | 19.42310182 | -6.726940584 | 2.920285026 | 5.668739433 | 0.578916359 | 1           |
| ASV_16s_316 | 17.53190121 | 10.41951871  | 1.456080894 | 19.07201945 | 0.007964701 | 0.068377804 |
| ASV_16s_317 | 17.37682729 | -7.530606769 | 1.599027916 | 12.57078878 | 0.083282683 | 0.459287872 |
| ASV_16s_318 | 13.91204105 | -2.480859337 | 1.853050117 | 11.1182955  | 0.133541618 | 0.636075028 |
| ASV_16s_319 | 15.97977493 | 1.830529624  | 1.360510174 | 17.19858245 | 0.016159597 | 0.128270111 |
| ASV_16s_320 | 26.54115123 | 0.545748624  | 1.379336592 | 41.32055902 | 7.03E-07    | 1.75E-05    |
| ASV_16s_321 | 5.529265397 | -24.97842477 | 3.551438102 | 4.338241665 | NA          | NA          |
| ASV_16s_322 | 16.56250705 | 5.770606275  | 1.413559036 | 14.59475104 | 0.041559534 | 0.272671087 |
| ASV_16s_323 | 24.83251295 | -16.19746737 | 3.546054004 | 3.035900781 | NA          | NA          |
| ASV_16s_324 | 25.92971262 | 1.723813931  | 1.369371715 | 33.46440056 | 2.17E-05    | 4.17E-04    |
| ASV_16s_325 | 16.27887758 | 8.330103734  | 2.237067902 | 10.44252633 | 0.164851729 | 0.736358    |
| ASV_16s_326 | 16.48200848 | 9.643078898  | 1.951955428 | 12.05987663 | 0.098606908 | 0.521238697 |
| ASV_16s_327 | 16.13459979 | 4.261761379  | 1.649251485 | 17.71925273 | 0.013302972 | 0.109174562 |
| ASV_16s_328 | 16.86410302 | 10.13241632  | 2.492812335 | 7.096995934 | 0.418851105 | 1           |
| ASV_16s_329 | 16.33832279 | 10.98286518  | 1.598308448 | 17.13126584 | 0.016569083 | 0.129989756 |
| ASV_16s_330 | 15.54768242 | -7.642058589 | 1.706629942 | 12.37981628 | 0.088740117 | 0.482786118 |
| ASV_16s_331 | 15.25603727 | 12.24959955  | 2.858038361 | 5.485783232 | 0.600899232 | 1           |
| ASV_16s_332 | 12.84522967 | 3.492259086  | 1.244786423 | 20.46883758 | 0.004641232 | 0.045624643 |
| ASV_16s_333 | 9.316204579 | -9.383317506 | 3.552157344 | 2.920925584 | NA          | NA          |
| ASV_16s_334 | 21.55433712 | 0.734753302  | 2.544269264 | 12.97751614 | 0.072658105 | 0.418822075 |

|             |             |              |             |             |             |             |
|-------------|-------------|--------------|-------------|-------------|-------------|-------------|
| ASV_16s_335 | 17.54935312 | 10.87970427  | 1.599416841 | 15.44678728 | 0.030680177 | 0.216550173 |
| ASV_16s_336 | 17.56330152 | 11.16171804  | 1.449990989 | 19.25217912 | 0.007433005 | 0.06520038  |
| ASV_16s_337 | 5.498203989 | -11.85705101 | 3.549483421 | 4.614042538 | 0.706944673 | 1           |
| ASV_16s_338 | 13.54444631 | 1.682300661  | 3.546138321 | 4.876534272 | NA          | NA          |
| ASV_16s_339 | 16.14809307 | 8.244248133  | 1.681057549 | 10.25404205 | 0.174628408 | 0.76652072  |
| ASV_16s_340 | 0.083053082 | 0.077649298  | 3.551802732 | 0.234135117 | 0.999956904 | NA          |
| ASV_16s_341 | 16.07680311 | 5.429199526  | 1.575839111 | 15.27076721 | 0.032681026 | 0.22735852  |
| ASV_16s_342 | 15.79505586 | 12.54980023  | 1.881201753 | 14.65276417 | 0.040717189 | 0.267870421 |
| ASV_16s_343 | 11.88581964 | 3.934491504  | 1.770368194 | 9.9749554   | 0.189997171 | 0.814129472 |
| ASV_16s_344 | 4.064490224 | -24.17720378 | 3.551438079 | 3.541177967 | 0.830844909 | 1           |
| ASV_16s_345 | 4.839660653 | -2.528738358 | 3.545224531 | 2.7257547   | NA          | NA          |
| ASV_16s_346 | 23.61182147 | -0.337461831 | 1.512728684 | 27.39527994 | 2.83E-04    | 0.004076185 |
| ASV_16s_347 | 19.2788076  | -0.373226793 | 1.601664085 | 24.29091289 | 0.001012649 | 0.012136745 |
| ASV_16s_348 | 23.14090424 | 8.440996273  | 3.549741169 | 5.104246184 | 0.647243147 | 1           |
| ASV_16s_349 | 14.89225233 | 9.27588759   | 2.066708236 | 8.931287005 | 0.257627096 | 0.998771776 |
| ASV_16s_350 | 15.91163246 | 11.0251403   | 1.696587977 | 13.44614849 | 0.061955918 | 0.378775951 |
| ASV_16s_351 | 15.06932072 | 0.843244515  | 1.316518035 | 33.95928706 | 1.75E-05    | 3.48E-04    |
| ASV_16s_352 | 15.08045428 | 0.736094832  | 1.369512761 | 26.02615729 | 4.98E-04    | 0.006854021 |
| ASV_16s_353 | 25.27355743 | 1.952541113  | 1.560882293 | 24.43674159 | 9.54E-04    | 0.0115534   |
| ASV_16s_354 | 10.7318184  | 17.5617619   | 3.549937607 | 3.288534518 | NA          | NA          |
| ASV_16s_355 | 15.66708211 | -0.274387707 | 1.190170175 | 15.95296888 | 0.025549534 | 0.187440675 |
| ASV_16s_356 | 13.96301121 | 12.38859157  | 2.55276886  | 7.893526967 | 0.342076238 | 1           |
| ASV_16s_357 | 5.97511732  | -13.87202563 | 3.552157344 | 2.648456255 | NA          | NA          |
| ASV_16s_358 | 4.241949823 | -25.00175574 | 3.551437987 | 2.454240268 | NA          | NA          |
| ASV_16s_359 | 20.1790243  | 4.707424482  | 1.550232206 | 23.6079566  | 0.001334889 | 0.015612394 |
| ASV_16s_360 | 14.36318065 | 4.229169967  | 2.050121225 | 9.945878751 | 0.191661275 | 0.816922443 |
| ASV_16s_361 | 14.80359611 | 3.599508876  | 1.490067071 | 11.43596195 | 0.120700743 | 0.59514562  |
| ASV_16s_362 | 14.53048685 | 11.50819152  | 2.504876108 | 6.726038355 | 0.457951116 | 1           |
| ASV_16s_363 | 21.91421123 | 4.058300549  | 1.580915324 | 18.34574993 | 0.010503718 | 0.088052868 |
| ASV_16s_364 | 4.344341501 | -4.991615617 | 3.550775583 | 4.366271525 | 0.736754795 | 1           |
| ASV_16s_365 | 18.58222355 | 1.287135627  | 0.851319559 | 63.45949846 | 3.07E-11    | 1.48E-09    |
| ASV_16s_366 | 14.94507369 | 10.12604322  | 1.415844873 | 21.47404283 | 0.003128377 | 0.032366672 |
| ASV_16s_367 | 16.64406498 | 1.788117837  | 1.380776226 | 30.87454748 | 6.56E-05    | 0.001125935 |
| ASV_16s_368 | 14.83676979 | 0.703841755  | 2.15463177  | 9.903760095 | 0.194093221 | 0.82294166  |
| ASV_16s_369 | 19.59901871 | 1.363550676  | 1.909172888 | 20.46135045 | 0.004654807 | 0.045624643 |
| ASV_16s_370 | 11.85613838 | -2.837080608 | 1.973403342 | 12.09028639 | 0.097628573 | 0.519090802 |
| ASV_16s_371 | 18.74278265 | -2.253561759 | 1.571820958 | 15.59897053 | 0.029043701 | 0.207418288 |
| ASV_16s_372 | 18.67913459 | 0.906228974  | 1.08982959  | 48.60033045 | 2.72E-08    | 8.33E-07    |
| ASV_16s_373 | 14.44461047 | 10.13850557  | 2.063874684 | 9.108492678 | 0.244960321 | 0.961181421 |
| ASV_16s_374 | 19.69797258 | 1.196153114  | 2.196903283 | 14.68082664 | 0.040315463 | 0.265950235 |
| ASV_16s_375 | 25.94051919 | 7.55165111   | 1.639168348 | 19.7649315  | 0.006100445 | 0.056370909 |
| ASV_16s_376 | 12.12501692 | 1.200076149  | 1.5993543   | 7.64864839  | 0.364592352 | 1           |
| ASV_16s_377 | 14.09914824 | 12.2068011   | 2.249628963 | 10.21684672 | 0.176614395 | 0.771147377 |
| ASV_16s_378 | 16.98744485 | 2.505602917  | 1.202891113 | 17.0814515  | 0.01687845  | 0.13181525  |
| ASV_16s_379 | 9.556543226 | 18.18890085  | 3.551439046 | 2.887744759 | NA          | NA          |
| ASV_16s_380 | 4.454001216 | -24.21607951 | 3.550584542 | 2.218255323 | NA          | NA          |
| ASV_16s_381 | 13.68199403 | 12.07425544  | 2.194960637 | 10.88617807 | 0.143661515 | 0.673682217 |
| ASV_16s_382 | 14.37591841 | -2.604921791 | 0.981802967 | 17.73331153 | 0.013232972 | 0.109146503 |
| ASV_16s_383 | 15.28898399 | -6.09148861  | 1.692622575 | 20.08392019 | 0.005391241 | 0.051589704 |
| ASV_16s_384 | 15.74365924 | -6.23437293  | 1.751490021 | 12.14246858 | 0.095969985 | 0.515173686 |
| ASV_16s_385 | 13.88060309 | -0.891466523 | 1.620696352 | 14.75058176 | 0.039332852 | 0.262951231 |
| ASV_16s_386 | 9.227217469 | -7.240457069 | 2.052971335 | 6.427086172 | 0.490856371 | 1           |
| ASV_16s_387 | 25.1128971  | 29.9621421   | 3.549051403 | 2.495645651 | NA          | NA          |
| ASV_16s_388 | 13.52732866 | 10.05513636  | 2.475246824 | 6.856619302 | 0.443959888 | 1           |
| ASV_16s_389 | 11.5167151  | -21.68526524 | 3.55019716  | 2.556525204 | NA          | NA          |
| ASV_16s_390 | 0.795672241 | 2.147404639  | 3.548677439 | 1.33134918  | NA          | NA          |
| ASV_16s_391 | 13.33652294 | -17.85762943 | 3.552157344 | 2.051969965 | 0.956907982 | 1           |
| ASV_16s_392 | 13.91213088 | 10.34480103  | 1.58928558  | 14.97276662 | 0.036350086 | 0.249301861 |
| ASV_16s_393 | 9.744631222 | 1.098551897  | 1.937627264 | 9.66086775  | NA          | NA          |
| ASV_16s_394 | 15.74249038 | 3.612486689  | 1.086021911 | 21.67069983 | 0.002894498 | 0.030335844 |
| ASV_16s_395 | 21.08172104 | -9.190928098 | 3.552157344 | 2.064505207 | 0.956183963 | 1           |
| ASV_16s_396 | 13.61558417 | 1.433267006  | 1.268595526 | 17.61846129 | 0.013815293 | 0.112996031 |
| ASV_16s_397 | 17.72982954 | -7.510351387 | 2.885037497 | 5.331564145 | 0.6195703   | 1           |
| ASV_16s_398 | 12.5264141  | -10.39821831 | 3.549052196 | 4.539290562 | 0.715981008 | 1           |
| ASV_16s_399 | 17.39441148 | -0.070630852 | 1.694267138 | 23.02820737 | 0.001685434 | 0.019338555 |
| ASV_16s_400 | 13.93005389 | 1.908666356  | 1.03369029  | 31.86291286 | 4.31E-05    | 7.67E-04    |
| ASV_16s_401 | 17.06742194 | 4.79562401   | 1.585172628 | 12.77784444 | 0.077709755 | 0.437523994 |

|             |             |              |             |             |             |             |
|-------------|-------------|--------------|-------------|-------------|-------------|-------------|
| ASV_16s_402 | 14.51712651 | -0.5351074   | 1.015106097 | 50.79736686 | 1.01E-08    | 3.43E-07    |
| ASV_16s_403 | 17.53378781 | 0.235423032  | 1.906356853 | 14.74387173 | 0.039426393 | 0.262951231 |
| ASV_16s_404 | 18.98792327 | -4.927780822 | 2.523761739 | 8.269994188 | 0.309389324 | 1           |
| ASV_16s_405 | 15.257897   | -28.65749968 | 2.036778105 | 10.86290423 | 0.144711875 | 0.673745093 |
| ASV_16s_406 | 4.6687653   | 17.30307237  | 3.551442105 | 3.950351832 | 0.785477845 | 1           |
| ASV_16s_407 | 13.37746795 | 5.506883854  | 2.112008005 | 11.05002622 | 0.136451738 | 0.647744428 |
| ASV_16s_408 | 11.16507021 | 3.606974831  | 1.825304805 | 9.198943392 | 0.238686629 | 0.955141038 |
| ASV_16s_409 | 3.888379732 | -25.16722707 | 3.55143803  | 2.400774264 | NA          | NA          |
| ASV_16s_410 | 12.51974938 | -12.2412324  | 3.548496558 | 4.54557786  | 0.715222208 | 1           |
| ASV_16s_411 | 16.78493886 | 1.549573446  | 1.021184367 | 47.1684994  | 5.18E-08    | 1.47E-06    |
| ASV_16s_412 | 18.49027987 | 17.44308981  | 3.550586118 | 5.028542595 | NA          | NA          |
| ASV_16s_413 | 5.316396925 | -8.838182159 | 3.549163    | 1.762579153 | NA          | NA          |
| ASV_16s_414 | 2.425180764 | -24.52889019 | 3.551438342 | 2.110828484 | 0.953452241 | 1           |
| ASV_16s_415 | 9.159035743 | 7.554368164  | 3.544805908 | 2.224719804 | NA          | NA          |
| ASV_16s_416 | 13.29296421 | -4.302065405 | 1.177259724 | 19.34635763 | 0.007168849 | 0.063570108 |
| ASV_16s_417 | 16.36696613 | -3.731886928 | 2.049005958 | 12.65960414 | 0.080849372 | 0.448936538 |
| ASV_16s_418 | 13.52343031 | -2.386343977 | 1.402874425 | 21.69861637 | 0.002862707 | 0.030133107 |
| ASV_16s_419 | 12.53995036 | 7.755320908  | 3.548945898 | 2.026220433 | 0.95837487  | 1           |
| ASV_16s_420 | 15.23729054 | 2.431641034  | 1.100663892 | 31.90697127 | 4.23E-05    | 7.58E-04    |
| ASV_16s_421 | 16.29632777 | -1.62979713  | 3.104478282 | 6.379314212 | 0.496221069 | 1           |
| ASV_16s_422 | 4.777513167 | -1.281670279 | 3.550723785 | 5.158970497 | 0.640570269 | 1           |
| ASV_16s_423 | 5.797844272 | 19.07418766  | 3.551438786 | 2.53930047  | 0.92410874  | 1           |
| ASV_16s_424 | 8.130705533 | -30          | 3.550111564 | 3.021405499 | 0.883015008 | 1           |
| ASV_16s_425 | 3.52008502  | -25.06728581 | 3.551438118 | 2.998996863 | NA          | NA          |
| ASV_16s_426 | 13.63591998 | -9.342507349 | 1.756983597 | 9.121167214 | 0.244073446 | 0.961181421 |
| ASV_16s_427 | 13.70340478 | -30          | 2.377092017 | 8.723847048 | 0.273095431 | 1           |
| ASV_16s_428 | 13.17320143 | 1.779902196  | 1.313887036 | 11.96120158 | 0.101842017 | 0.529097687 |
| ASV_16s_429 | 14.81319852 | 6.409951628  | 2.939324474 | 4.507357248 | 0.719831157 | 1           |
| ASV_16s_430 | 11.67602901 | 10.66352502  | 1.780460468 | 11.73106838 | 0.109756949 | 0.554325566 |
| ASV_16s_431 | 3.642259576 | -24.98993267 | 3.551026057 | 2.20456042  | NA          | NA          |
| ASV_16s_432 | 10.17217161 | 4.49159693   | 2.153358845 | 2.966416511 | 0.888091493 | 1           |
| ASV_16s_433 | 15.64609129 | -3.015271585 | 1.508394958 | 21.4130506  | 0.003204574 | 0.033013932 |
| ASV_16s_434 | 15.99489498 | -7.798409925 | 2.425651192 | 11.771688   | 0.108321462 | 0.549782513 |
| ASV_16s_435 | 12.36268082 | -0.555240991 | 1.284888455 | 27.03124618 | 3.29E-04    | 0.004685228 |
| ASV_16s_436 | 12.13190726 | 4.378903861  | 1.696705673 | 9.130891257 | 0.243394746 | 0.961181421 |
| ASV_16s_437 | 15.58621612 | 0.355342405  | 2.44354731  | 8.463683431 | 0.293485737 | 1           |
| ASV_16s_438 | 14.63335087 | 1.300814729  | 1.06258284  | 52.66263379 | 4.32E-09    | 1.61E-07    |
| ASV_16s_439 | 13.47531248 | 4.363664956  | 1.019270904 | 26.50686041 | 4.09E-04    | 0.005752761 |
| ASV_16s_440 | 12.77374947 | -1.761468343 | 1.475163107 | 14.54440695 | 0.042303658 | 0.274867208 |
| ASV_16s_441 | 17.09499838 | 1.211169095  | 1.108750362 | 48.12504309 | 3.37E-08    | 1.02E-06    |
| ASV_16s_442 | 5.189409391 | -3.077313721 | 3.54788833  | 1.673970465 | 0.975669068 | 1           |
| ASV_16s_443 | 7.523802453 | -24.76758301 | 3.550935172 | 2.576386837 | 0.921236071 | 1           |
| ASV_16s_444 | 15.95081663 | 1.280149055  | 2.556479921 | 11.78997366 | 0.107680703 | 0.549323381 |
| ASV_16s_445 | 16.68797226 | 4.546633762  | 1.858962235 | 21.81611197 | 0.002732589 | 0.029272552 |
| ASV_16s_446 | 15.74554775 | -3.951527998 | 2.253115463 | 6.900919066 | 0.439268622 | 1           |
| ASV_16s_447 | 14.97293264 | -14.61731015 | 3.016279239 | 2.379456383 | 0.935897383 | 1           |
| ASV_16s_448 | 11.99222637 | 1.460288517  | 1.931333998 | 9.326446957 | 0.230060362 | 0.934523719 |
| ASV_16s_449 | 9.046860128 | -3.171227255 | 3.37971464  | 3.106861859 | 0.87494373  | 1           |
| ASV_16s_450 | 11.46941476 | -2.936544655 | 1.901854278 | 6.166642018 | 0.520431944 | 1           |
| ASV_16s_451 | 8.830292102 | 8.739784666  | 3.547050108 | 2.889145177 | 0.895064276 | 1           |
| ASV_16s_452 | 4.559947053 | 1.343936108  | 3.550449057 | 3.642720413 | 0.819885653 | 1           |
| ASV_16s_453 | 11.45186475 | -21.53275367 | 3.552157344 | 1.93365287  | 0.963421011 | 1           |
| ASV_16s_454 | 5.13666717  | 22.66437848  | 3.550046693 | 2.647329875 | 0.915600597 | 1           |
| ASV_16s_455 | 12.54390376 | -4.384018633 | 2.160079656 | 10.41491929 | 0.166254054 | 0.739891661 |
| ASV_16s_456 | 12.3470056  | -29.83172293 | 1.857769052 | 9.964085982 | 0.190617836 | 0.815345903 |
| ASV_16s_457 | 11.38207101 | 0.355580656  | 2.421771749 | 3.789567152 | 0.803671099 | 1           |
| ASV_16s_458 | 11.91962225 | 0.880186398  | 1.530104887 | 18.90902352 | 0.008477161 | 0.072520167 |
| ASV_16s_459 | 8.28793767  | -7.498155876 | 3.546874461 | 2.900384456 | NA          | NA          |
| ASV_16s_460 | 1.948836631 | -24.23936706 | 3.551438545 | 1.976558813 | NA          | NA          |
| ASV_16s_461 | 11.89960565 | -8.847359181 | 3.549011045 | 2.053314906 | 0.95683061  | 1           |
| ASV_16s_462 | 15.04885776 | 5.215340871  | 1.137282763 | 24.9013085  | 7.90E-04    | 0.009858455 |
| ASV_16s_463 | 7.21423863  | -29.99779181 | 3.550662938 | 2.381450502 | 0.935756353 | 1           |
| ASV_16s_464 | 3.564367705 | -23.78750672 | 3.550587041 | 2.095301501 | NA          | NA          |
| ASV_16s_465 | 4.150575424 | -6.961656964 | 2.516096861 | 1.651721913 | 0.976587758 | 1           |
| ASV_16s_466 | 13.99224033 | 1.266746876  | 2.247173963 | 11.11381908 | 0.133730768 | 0.636075028 |
| ASV_16s_467 | 11.37929198 | -8.536580648 | 1.732567671 | 15.92159399 | 0.025842423 | 0.189016632 |
| ASV_16s_468 | 3.785230934 | -0.900288035 | 3.548371803 | 5.263230549 | 0.627874289 | 1           |

|             |             |              |             |             |             |             |
|-------------|-------------|--------------|-------------|-------------|-------------|-------------|
| ASV_16s_469 | 13.54711023 | 21.03668342  | 3.550607272 | 3.842948969 | 0.797678586 | 1           |
| ASV_16s_470 | 14.62874614 | 2.202296703  | 2.83904739  | 8.377284537 | 0.300503288 | 1           |
| ASV_16s_471 | 8.103676688 | 0.93046372   | 2.532853163 | 5.442080346 | 0.60617896  | 1           |
| ASV_16s_472 | 10.86092841 | 9.801822817  | 2.438344426 | 6.634757083 | 0.467872456 | 1           |
| ASV_16s_473 | 11.45679476 | 8.540581596  | 1.698144926 | 12.64049878 | 0.081367315 | 0.450778647 |
| ASV_16s_474 | 13.5667232  | -0.034673394 | 1.337267162 | 29.80275412 | 1.03E-04    | 0.001654688 |
| ASV_16s_475 | 11.00748661 | 9.786703541  | 1.478603512 | 16.54466892 | 0.020580324 | 0.157176542 |
| ASV_16s_476 | 12.98854273 | 0.877118384  | 1.411399302 | 20.93751866 | 0.003863734 | 0.039302944 |
| ASV_16s_477 | 7.989452003 | -0.958808896 | 2.498347451 | 5.239750973 | NA          | NA          |
| ASV_16s_478 | 11.39213787 | 7.393104717  | 1.943744262 | 10.452799   | 0.164332488 | 0.735395476 |
| ASV_16s_479 | 11.64602864 | 7.622383759  | 1.300089799 | 24.83864235 | 8.10E-04    | 0.010061742 |
| ASV_16s_480 | 6.213895416 | -20.15241128 | 3.551456506 | 3.172023425 | 0.868645658 | 1           |
| ASV_16s_481 | 12.4137296  | 6.173600802  | 1.53531185  | 9.199437717 | 0.238652695 | 0.955141038 |
| ASV_16s_482 | 10.84433079 | 3.335028992  | 1.215133917 | 23.27330168 | 0.001527453 | 0.017693605 |
| ASV_16s_483 | 12.46094884 | -30          | 2.742850797 | 7.261233708 | 0.402196601 | 1           |
| ASV_16s_484 | 12.19837264 | -2.408663408 | 1.702884349 | 11.78721364 | 0.107777202 | 0.549323381 |
| ASV_16s_485 | 11.9280937  | 3.246668671  | 1.757584622 | 10.49145728 | 0.162390904 | 0.72839759  |
| ASV_16s_486 | 11.59002926 | 0.820365064  | 1.433739303 | 23.32932228 | 0.001493427 | 0.017382628 |
| ASV_16s_487 | 15.50769899 | 0.477713997  | 2.18155799  | 19.34276553 | 0.007178756 | 0.063570108 |
| ASV_16s_488 | 10.55049016 | -11.67905295 | 3.54853585  | 4.299108775 | 0.744753124 | 1           |
| ASV_16s_489 | 3.449152873 | -23.95244417 | 3.550587458 | 2.077171058 | NA          | NA          |
| ASV_16s_490 | 16.30525758 | 0.87949389   | 1.64990677  | 16.22066726 | 0.023175029 | 0.174244548 |
| ASV_16s_491 | 4.505639111 | -23.18267357 | 3.551439733 | 3.189756663 | 0.866910832 | 1           |
| ASV_16s_492 | 10.64531039 | 10.11815225  | 1.861927093 | 10.87774576 | 0.144041306 | 0.673682217 |
| ASV_16s_493 | 13.92022473 | 0.258765376  | 2.14517148  | 16.85655308 | 0.018344942 | 0.141894906 |
| ASV_16s_494 | 10.16015974 | 9.208290615  | 2.46312072  | 5.209110117 | 0.634461321 | 1           |
| ASV_16s_495 | 10.57565226 | -0.977238368 | 1.556266093 | 6.237369935 | 0.512322583 | 1           |
| ASV_16s_496 | 3.377690509 | -25.25119744 | 3.550587824 | 2.065614827 | NA          | NA          |
| ASV_16s_497 | 15.06961833 | 0.901258642  | 1.967827425 | 23.00678493 | 0.001699977 | 0.019413411 |
| ASV_16s_498 | 11.25262256 | -2.94222615  | 1.914530199 | 12.95172855 | 0.073293287 | 0.421479922 |
| ASV_16s_499 | 11.74657816 | 3.508325182  | 1.052654977 | 21.8203757  | 0.002727977 | 0.029272552 |
| ASV_16s_500 | 17.23614904 | 1.693961109  | 1.478875858 | 40.22968385 | 1.14E-06    | 2.75E-05    |
| ASV_16s_501 | 5.647688761 | -30          | 3.55033691  | 3.050814425 | 0.880262008 | 1           |
| ASV_16s_502 | 11.48956678 | -2.699874712 | 1.545157274 | 14.95261002 | 0.036611696 | 0.250366464 |
| ASV_16s_503 | 13.81419205 | -0.603765882 | 3.549158979 | 4.985175428 | 0.661772436 | 1           |
| ASV_16s_504 | 11.1922574  | 10.61087356  | 1.523902862 | 13.35598528 | 0.063895482 | 0.385763    |
| ASV_16s_505 | 15.99558254 | -11.653244   | 3.552157344 | 2.569166025 | NA          | NA          |
| ASV_16s_506 | 12.29094013 | -0.556146245 | 1.984699747 | 9.359099956 | 0.227891787 | 0.928831678 |
| ASV_16s_507 | 11.63328739 | 1.606291685  | 1.811079721 | 17.29164941 | 0.015609336 | 0.124720138 |
| ASV_16s_508 | 12.74307262 | -1.024619134 | 1.866083787 | 9.635237296 | 0.210203555 | 0.87128452  |
| ASV_16s_509 | 9.56299137  | 9.625756168  | 2.128400668 | 8.369315753 | 0.30115674  | 1           |
| ASV_16s_510 | 6.526215591 | -10.24862431 | 3.547449423 | 2.278888322 | 0.9428075   | 1           |
| ASV_16s_511 | 9.541074082 | -8.102789299 | 1.966602896 | 3.543391114 | 0.830608404 | 1           |
| ASV_16s_512 | 17.42618514 | 28.32555168  | 3.549045479 | 2.594650633 | 0.919802762 | 1           |
| ASV_16s_513 | 13.35447994 | 6.327943614  | 1.548774797 | 8.114561816 | 0.322600508 | 1           |
| ASV_16s_514 | 4.190592927 | 18.86646021  | 3.551439244 | 2.340125153 | NA          | NA          |
| ASV_16s_515 | 10.26521261 | -0.99762808  | 1.50612914  | 9.753969462 | 0.202949779 | 0.853023291 |
| ASV_16s_516 | 10.23762763 | 4.552752402  | 2.14510876  | 7.478086289 | 0.380852223 | 1           |
| ASV_16s_517 | 14.32596939 | -4.716171203 | 2.508014793 | 7.802069572 | 0.350370511 | 1           |
| ASV_16s_518 | 4.793469515 | 1.439191893  | 3.55071622  | 3.954304884 | NA          | NA          |
| ASV_16s_519 | 11.6408213  | -6.730568429 | 1.776643494 | 17.50529378 | 0.014412992 | 0.117487724 |
| ASV_16s_520 | 12.7229443  | -0.511117266 | 1.369555184 | 19.69751878 | 0.006261464 | 0.057420468 |
| ASV_16s_521 | 7.721643584 | -1.180703241 | 2.792185558 | 4.362067091 | 0.73725669  | 1           |
| ASV_16s_522 | 10.52215335 | -8.385076116 | 3.547133363 | 1.945521416 | NA          | NA          |
| ASV_16s_523 | 10.34194229 | 9.866296094  | 2.782417378 | 4.920916592 | 0.669613675 | 1           |
| ASV_16s_524 | 10.58614376 | 0.23057469   | 1.585503919 | 20.86348243 | 0.003977545 | 0.040123484 |
| ASV_16s_525 | 9.3458789   | -2.751702221 | 2.051520324 | 10.60252398 | 0.156920938 | 0.712768465 |
| ASV_16s_526 | 13.34488719 | 0.739290383  | 2.357444038 | 13.20471311 | 0.067274923 | 0.39919752  |
| ASV_16s_527 | 10.12817354 | 9.288158157  | 2.118433476 | 8.466537858 | 0.293255994 | 1           |
| ASV_16s_528 | 10.40582722 | 8.437193812  | 1.602138956 | 14.72016635 | 0.03975852  | 0.263434898 |
| ASV_16s_529 | 9.405334884 | 11.30277169  | 3.17407048  | 4.802760781 | 0.684018691 | 1           |
| ASV_16s_530 | 7.183632215 | -13.17250722 | 3.547133314 | 2.124929911 | NA          | NA          |
| ASV_16s_531 | 12.21283747 | 2.907655693  | 1.375032888 | 11.30100193 | 0.126017724 | 0.611400623 |
| ASV_16s_532 | 10.74545406 | 10.87041932  | 1.993050884 | 7.84486956  | 0.346471846 | 1           |
| ASV_16s_533 | 10.94307556 | -0.308375447 | 1.483910691 | 18.79486116 | 0.008854833 | 0.074956474 |
| ASV_16s_534 | 13.05115847 | 3.204492444  | 3.548081521 | 5.242495831 | 0.630396967 | 1           |
| ASV_16s_535 | 10.66036665 | 6.600721437  | 2.432260316 | 9.086624197 | 0.246496494 | 0.964516234 |

|             |             |              |             |             |             |             |
|-------------|-------------|--------------|-------------|-------------|-------------|-------------|
| ASV_16s_536 | 10.96796508 | 5.265243807  | 1.580983412 | 12.91844467 | 0.07412058  | 0.425227307 |
| ASV_16s_537 | 11.94992753 | -4.453283382 | 1.696311451 | 13.04172191 | 0.071098346 | 0.41279216  |
| ASV_16s_538 | 3.461260515 | 0.813007335  | 3.550773739 | 3.276854904 | 0.858264754 | 1           |
| ASV_16s_539 | 2.638046981 | -4.221725846 | 3.550772733 | 3.689506512 | 0.814764616 | 1           |
| ASV_16s_540 | 9.097990444 | 10.36717073  | 2.780840977 | 4.861280456 | 0.676887269 | 1           |
| ASV_16s_541 | 12.41651058 | 2.773615763  | 1.65767846  | 9.624915064 | 0.210844059 | 0.87128452  |
| ASV_16s_542 | 10.75268898 | 0.082467167  | 1.711622069 | 12.54927803 | 0.083881888 | 0.461541025 |
| ASV_16s_543 | 10.03567051 | -30          | 3.548310742 | 1.506219905 | NA          | NA          |
| ASV_16s_544 | 13.28262137 | 4.56631752   | 3.420545241 | 5.725661849 | 0.572122442 | 1           |
| ASV_16s_545 | 8.737169487 | 11.43805159  | 3.54628115  | 3.785572767 | 0.804117484 | 1           |
| ASV_16s_546 | 10.15751446 | -5.049889816 | 2.020362765 | 8.138330488 | 0.320554346 | 1           |
| ASV_16s_547 | 3.874811642 | -10.13612062 | 3.552157344 | 2.382724381 | 0.93566618  | 1           |
| ASV_16s_548 | 2.526885372 | -7.064293425 | 3.551355802 | 2.678133387 | 0.913097198 | 1           |
| ASV_16s_549 | 10.83817305 | -26.78380727 | 2.000802595 | 10.16324365 | 0.179509809 | 0.780239225 |
| ASV_16s_550 | 9.003654509 | -2.317926602 | 1.780172902 | 13.87420022 | 0.053464599 | 0.334416596 |
| ASV_16s_551 | 9.156442794 | 24.61013682  | 3.252568676 | 3.994867005 | 0.780368441 | 1           |
| ASV_16s_552 | 11.2032653  | 8.79514589   | 1.81914929  | 10.86473494 | 0.144629014 | 0.673745093 |
| ASV_16s_553 | 12.77622383 | -0.105053741 | 3.549157083 | 4.895788061 | 0.672679087 | 1           |
| ASV_16s_554 | 12.77552491 | -0.14302098  | 3.549181731 | 4.761803447 | 0.689004961 | 1           |
| ASV_16s_555 | 9.127156626 | 5.8526163    | 3.11665172  | 4.975480582 | 0.662955587 | 1           |
| ASV_16s_556 | 10.12376308 | -0.512904085 | 1.494374878 | 26.25311248 | 4.54E-04    | 0.006314261 |
| ASV_16s_557 | 9.090086589 | -5.955721689 | 1.701922202 | 6.180646404 | 0.518821866 | 1           |
| ASV_16s_558 | 11.05556592 | -5.569931273 | 2.099235218 | 11.38021202 | 0.122872764 | 0.602176034 |
| ASV_16s_559 | 11.7542897  | -0.726517918 | 1.845019241 | 5.370453239 | 0.614852097 | 1           |
| ASV_16s_560 | 12.26674735 | 0.663039191  | 2.261691606 | 12.68345441 | 0.080206984 | 0.44639335  |
| ASV_16s_561 | 8.899978176 | 9.675533883  | 3.260052643 | 3.620528908 | 0.82229922  | 1           |
| ASV_16s_562 | 9.971773569 | 6.832254394  | 1.636235655 | 13.40538068 | 0.062826117 | 0.383128535 |
| ASV_16s_563 | 11.06456176 | 0.830932868  | 2.055721357 | 13.36146588 | 0.063776015 | 0.385763    |
| ASV_16s_564 | 6.492751064 | -5.389555911 | 2.15974097  | 3.219485348 | 0.863982913 | 1           |
| ASV_16s_565 | 11.90715681 | -0.191471504 | 2.104107349 | 17.46304034 | 0.014642427 | 0.118559581 |
| ASV_16s_566 | 2.94451079  | -23.48255728 | 3.550589674 | 1.989897442 | NA          | NA          |
| ASV_16s_567 | 3.317885173 | -12.65725705 | 3.549484695 | 3.384004064 | 0.847354601 | 1           |
| ASV_16s_568 | 5.702994188 | -15.1746007  | 3.552157344 | 2.61984609  | 0.917805484 | 1           |
| ASV_16s_569 | 9.977249346 | 7.693295386  | 2.058819084 | 7.208948844 | 0.407453426 | 1           |
| ASV_16s_570 | 11.72376072 | -4.224801368 | 2.748171393 | 4.924393152 | 0.669189519 | 1           |
| ASV_16s_571 | 8.206328897 | 1.60133605   | 1.851975059 | 10.65919558 | 0.154191042 | 0.703006614 |
| ASV_16s_572 | 2.886204455 | -23.50663126 | 3.550590023 | 1.978856108 | NA          | NA          |
| ASV_16s_573 | 10.14529494 | 10.67439293  | 2.093976612 | 6.661962924 | 0.464903568 | 1           |
| ASV_16s_574 | 8.804476382 | 8.724673897  | 3.545620726 | 3.322670112 | 0.853635674 | 1           |
| ASV_16s_575 | 11.8114345  | 1.439899141  | 2.574239483 | 10.6897256  | 0.152737318 | 0.700762408 |
| ASV_16s_576 | 8.328100125 | 0.471012789  | 1.116708304 | 26.44027219 | 4.20E-04    | 0.00587893  |
| ASV_16s_577 | 9.069464996 | 1.965169271  | 1.992226161 | 8.068016921 | 0.32663449  | 1           |
| ASV_16s_578 | 3.744135251 | -7.355992744 | 3.550322884 | 1.672421913 | 0.975733675 | 1           |
| ASV_16s_579 | 10.16824752 | -3.229868709 | 1.204499379 | 11.2348727  | 0.128697055 | 0.623151142 |
| ASV_16s_580 | 8.994001988 | 10.78930144  | 1.902408385 | 7.82893392  | 0.34791991  | 1           |
| ASV_16s_581 | 6.455068043 | -10.4485621  | 3.546729272 | 2.244767638 | NA          | NA          |
| ASV_16s_582 | 10.61907559 | 9.444456258  | 3.112424311 | 1.596731081 | 0.978770672 | 1           |
| ASV_16s_583 | 8.805621358 | 8.601118008  | 2.94580874  | 4.324514894 | 0.741732427 | 1           |
| ASV_16s_584 | 8.691701254 | 8.746391403  | 3.200073789 | 4.059636284 | 0.772883427 | 1           |
| ASV_16s_585 | 10.02736943 | -0.849112242 | 1.757526837 | 16.99543124 | 0.017425667 | 0.135216471 |
| ASV_16s_586 | 7.516574818 | 2.151947457  | 1.411192864 | 15.71774153 | 0.027824001 | 0.199886966 |
| ASV_16s_587 | 10.10502349 | -30          | 2.274090804 | 10.26405519 | 0.174096994 | 0.766343316 |
| ASV_16s_588 | 10.84371994 | -3.629315813 | 1.353742492 | 13.18916565 | 0.06763136  | 0.40033135  |
| ASV_16s_589 | 3.223210789 | -1.43161667  | 3.550723068 | 4.509742076 | NA          | NA          |
| ASV_16s_590 | 11.29184846 | 0.065411119  | 3.031249209 | 5.679250235 | 0.577660085 | 1           |
| ASV_16s_591 | 12.53388463 | 5.307337232  | 1.256608928 | 6.380746509 | 0.496059818 | 1           |
| ASV_16s_592 | 6.050567893 | 23.9945398   | 3.548675055 | 1.923911397 | NA          | NA          |
| ASV_16s_593 | 14.2266873  | 14.38175804  | 3.549150663 | 3.853713846 | 0.796464207 | 1           |
| ASV_16s_594 | 11.65567406 | 5.750261285  | 3.545349957 | 1.997745674 | NA          | NA          |
| ASV_16s_595 | 1.489271936 | -23.75038644 | 3.551438862 | 1.811453293 | NA          | NA          |
| ASV_16s_596 | 5.822759335 | 2.529682619  | 3.224108439 | 3.302261877 | 0.855704428 | 1           |
| ASV_16s_597 | 7.974252993 | -4.764920393 | 2.225531989 | 4.315249465 | 0.742834762 | 1           |
| ASV_16s_598 | 9.952098    | -9.297027474 | 1.964914742 | 9.162797808 | 0.241178258 | 0.960445384 |
| ASV_16s_599 | 10.75362802 | -1.087549737 | 1.618090098 | 24.35538208 | 9.86E-04    | 0.011882115 |
| ASV_16s_600 | 9.77893936  | -30          | 3.098152432 | 4.505930818 | 0.720002986 | 1           |
| ASV_16s_601 | 2.756405467 | -23.44336815 | 3.550590707 | 1.953470381 | NA          | NA          |
| ASV_16s_603 | 8.008250564 | 0.75937592   | 1.426393414 | 23.7879291  | 0.001241359 | 0.014660153 |



|             |             |              |             |             |             |             |
|-------------|-------------|--------------|-------------|-------------|-------------|-------------|
| ASV_16s_604 | 11.744279   | 0.037327298  | 2.787775668 | 6.61701888  | 0.469813543 | 1           |
| ASV_16s_605 | 8.782062147 | 6.148069732  | 3.546362787 | 3.358602204 | 0.849967411 | 1           |
| ASV_16s_606 | 8.648020998 | -11.80920324 | 3.548504754 | 4.161549215 | 0.760993484 | 1           |
| ASV_16s_607 | 7.083978972 | 3.806557958  | 1.971333147 | 4.846149913 | 0.678731808 | 1           |
| ASV_16s_608 | 8.438373609 | 5.459021268  | 2.397688591 | 6.261371829 | 0.509583402 | 1           |
| ASV_16s_609 | 12.39854817 | 0.848242022  | 1.788456937 | 6.708950717 | 0.459799676 | 1           |
| ASV_16s_610 | 8.172248848 | -6.908257134 | 3.54926238  | 4.515508074 | NA          | NA          |
| ASV_16s_611 | 8.639741234 | 4.767700406  | 3.475845499 | 3.816880626 | 0.800611152 | 1           |
| ASV_16s_612 | 11.72855361 | -29.26582508 | 3.549059199 | 2.527590542 | 0.925005179 | 1           |
| ASV_16s_613 | 7.426209065 | -1.434935373 | 1.529345163 | 16.2510052  | 0.022919508 | 0.172860213 |
| ASV_16s_614 | 11.72816137 | 15.45068781  | 2.453053958 | 2.435295999 | 0.931890026 | 1           |
| ASV_16s_615 | 10.55633882 | 4.118153818  | 1.101423674 | 17.47173321 | 0.014594941 | 0.118559581 |
| ASV_16s_616 | 11.10971927 | 0.445739896  | 2.075671902 | 21.86840708 | 0.002676543 | 0.02905789  |
| ASV_16s_617 | 7.587329699 | 8.700745278  | 3.542908851 | 1.937514283 | 0.963217641 | 1           |
| ASV_16s_618 | 12.63749697 | 30           | 3.548301231 | 2.631506056 | NA          | NA          |
| ASV_16s_619 | 5.487797643 | -5.733903768 | 3.550577038 | 0.911481023 | 0.99613295  | 1           |
| ASV_16s_620 | 8.787979025 | 7.007377812  | 1.763478458 | 7.899073391 | 0.341577662 | 1           |
| ASV_16s_621 | 14.49184437 | 21.19611102  | 3.549361557 | 3.495662514 | NA          | NA          |
| ASV_16s_622 | 11.0177377  | 18.80627217  | 2.119363149 | 5.027900631 | 0.656558238 | 1           |
| ASV_16s_623 | 8.61082247  | -11.87828532 | 3.548524706 | 3.860573393 | 0.79568937  | 1           |
| ASV_16s_624 | 9.799849936 | -27.05278005 | 3.151741909 | 4.778483775 | 0.686974811 | 1           |
| ASV_16s_625 | 7.317649712 | 0.820470148  | 2.995194073 | 3.729742666 | 0.810326272 | 1           |
| ASV_16s_626 | 2.128968799 | -24.54390982 | 3.551438457 | 2.030821681 | NA          | NA          |
| ASV_16s_627 | 9.34776423  | -0.37540706  | 1.615951889 | 10.6169337  | 0.156222928 | 0.710931784 |
| ASV_16s_628 | 8.893582    | -0.061744846 | 1.942222101 | 7.934275975 | 0.338425082 | 1           |
| ASV_16s_629 | 8.227717691 | 6.150133651  | 3.114138177 | 4.59258929  | 0.709541186 | 1           |
| ASV_16s_630 | 11.4676028  | 0.783736945  | 2.501639586 | 11.592129   | 0.114795173 | 0.571850026 |
| ASV_16s_631 | 10.34169247 | -0.184296288 | 1.564253542 | 19.11928447 | 0.007821768 | 0.067389681 |
| ASV_16s_632 | 2.953230532 | 14.58867364  | 3.551477683 | 2.690073079 | 0.91211779  | 1           |
| ASV_16s_633 | 8.74294219  | -7.135163913 | 2.396012971 | 3.618580842 | 0.82251061  | 1           |
| ASV_16s_634 | 6.899010295 | 6.382651045  | 2.317099869 | 4.315221344 | 0.742838106 | 1           |
| ASV_16s_635 | 7.425126643 | 0.152101524  | 1.722443955 | 9.191405754 | 0.23920453  | 0.95563394  |
| ASV_16s_636 | 7.809602662 | -9.641528941 | 3.54920884  | 4.173930127 | 0.759540338 | 1           |
| ASV_16s_637 | 7.623558961 | -3.538545417 | 1.812719576 | 8.510316396 | 0.289749203 | 1           |
| ASV_16s_638 | 7.985914865 | 10.30333038  | 2.151509671 | 7.20751678  | 0.407598005 | 1           |
| ASV_16s_639 | 11.98607304 | -9.12714136  | 3.548451767 | 2.791680262 | 0.903581627 | 1           |
| ASV_16s_640 | 4.115695192 | -10.78660876 | 3.550291668 | 3.605206161 | 0.823959803 | 1           |
| ASV_16s_641 | 10.42925262 | 0.353363905  | 1.798780139 | 12.9893646  | 0.072367945 | 0.418145095 |
| ASV_16s_642 | 9.019611105 | 1.030957283  | 1.464523942 | 25.86909728 | 5.32E-04    | 0.007159013 |
| ASV_16s_643 | 10.07567891 | 0.924046285  | 1.238573002 | 32.62068455 | 3.11E-05    | 5.71E-04    |
| ASV_16s_644 | 2.074705495 | -23.85803647 | 3.551438485 | 2.014966756 | NA          | NA          |
| ASV_16s_645 | 12.30396647 | 0.603470972  | 3.550161135 | 2.82452978  | NA          | NA          |
| ASV_16s_646 | 5.673622561 | 19.06523206  | 3.551438811 | 2.526008823 | NA          | NA          |
| ASV_16s_647 | 8.813075025 | 1.855029041  | 1.057733804 | 25.01710961 | 7.54E-04    | 0.009501403 |
| ASV_16s_648 | 7.476224507 | -29.33895984 | 2.266253633 | 4.50302563  | 0.720352906 | 1           |
| ASV_16s_649 | 11.00379248 | 1.468969551  | 2.520779285 | 10.21374247 | 0.176780997 | 0.771147377 |
| ASV_16s_650 | 9.598591462 | -1.016134324 | 2.716522621 | 4.58365275  | 0.710622066 | 1           |
| ASV_16s_651 | 1.780670069 | 1.983910371  | 3.546756177 | 1.038864734 | 0.994176995 | NA          |
| ASV_16s_652 | 11.15137017 | 2.574354445  | 2.263690527 | 11.72694916 | 0.109903458 | 0.554325566 |
| ASV_16s_653 | 8.533086378 | 1.617942672  | 1.281683208 | 3.037557531 | 0.881506241 | 1           |
| ASV_16s_654 | 8.052186232 | 8.523723109  | 2.681802467 | 5.10786603  | 0.64680162  | 1           |
| ASV_16s_655 | 11.56854256 | -25.39817815 | 3.549013803 | 2.130921286 | NA          | NA          |
| ASV_16s_656 | 7.442818409 | 2.113614631  | 2.127942082 | 6.745499931 | 0.455850674 | 1           |
| ASV_16s_657 | 8.250915076 | 0.284522156  | 2.717870466 | 5.575183398 | 0.590131502 | 1           |
| ASV_16s_658 | 8.310706384 | -2.120225227 | 1.212264631 | 7.1778065   | 0.410604653 | 1           |
| ASV_16s_659 | 6.136834255 | -0.221790377 | 3.546242071 | 1.409357414 | 0.985282931 | 1           |
| ASV_16s_660 | 7.980295855 | 3.188975374  | 1.702121588 | 11.36543873 | 0.123454049 | 0.603802533 |
| ASV_16s_661 | 9.20112292  | -30          | 2.612832541 | 4.903883346 | 0.671691629 | 1           |
| ASV_16s_662 | 5.029768176 | -24.30782988 | 3.551177299 | 2.196665646 | 0.948158203 | 1           |
| ASV_16s_663 | 7.802683653 | 7.345897196  | 3.546440017 | 3.430866597 | 0.842492857 | 1           |
| ASV_16s_664 | 8.410723855 | -1.484613948 | 2.11104608  | 8.758538683 | 0.270460042 | 1           |
| ASV_16s_665 | 6.995922085 | 2.251480952  | 1.555611661 | 12.13182759 | 0.096306143 | 0.515834453 |
| ASV_16s_666 | 2.549310453 | -23.47811506 | 3.550592036 | 1.910381093 | NA          | NA          |
| ASV_16s_667 | 2.406029839 | -24.05783283 | 3.551438348 | 2.105939051 | 0.953744738 | 1           |
| ASV_16s_668 | 10.46942837 | 0.863739526  | 1.980650544 | 10.55507538 | 0.159238215 | 0.72059013  |
| ASV_16s_669 | 2.539101544 | -23.64506164 | 3.550592102 | 1.908167547 | NA          | NA          |
| ASV_16s_670 | 7.632537991 | 22.90547313  | 3.549076105 | 3.11121767  | 0.87452654  | 1           |

|             |             |              |             |             |             |             |
|-------------|-------------|--------------|-------------|-------------|-------------|-------------|
| ASV_16s_671 | 8.04865488  | 9.128486156  | 1.669088691 | 12.72924621 | 0.078986555 | 0.443680855 |
| ASV_16s_672 | 2.55890732  | -23.9132068  | 3.551439092 | 3.421282634 | 0.843491461 | 1           |
| ASV_16s_673 | 8.52399902  | -1.433436957 | 2.011398182 | 10.12175519 | 0.181778076 | 0.788682297 |
| ASV_16s_674 | 9.772877195 | -0.371146498 | 1.559990104 | 14.76818675 | 0.039088416 | 0.262425576 |
| ASV_16s_675 | 10.404345   | 0.215876992  | 2.181580458 | 14.89823887 | 0.037326183 | 0.253127981 |
| ASV_16s_676 | 6.600146416 | -0.269784578 | 1.981982248 | 6.413093584 | 0.492424799 | 1           |
| ASV_16s_677 | 11.1313252  | 27.48046659  | 2.891101279 | 2.122526129 | 0.952748483 | 1           |
| ASV_16s_678 | 10.72288791 | 1.244330417  | 2.879430181 | 7.342291734 | 0.394131239 | 1           |
| ASV_16s_679 | 9.239380763 | 3.156875784  | 1.428267338 | 14.25689773 | 0.046796337 | 0.298141923 |
| ASV_16s_680 | 2.647753607 | -1.585309297 | 3.550738748 | 3.903817408 | 0.790786782 | 1           |
| ASV_16s_681 | 6.787095064 | -6.590389458 | 1.904990686 | 3.743712931 | 0.808778056 | 1           |
| ASV_16s_682 | 7.95535587  | -4.370717395 | 1.7609383   | 9.666290314 | 0.208286252 | 0.864941709 |
| ASV_16s_683 | 9.473911786 | -0.906362189 | 2.741952054 | 3.878574944 | 0.793652241 | 1           |
| ASV_16s_684 | 11.00858752 | 0.421884966  | 2.715125956 | 5.421532951 | 0.608664575 | 1           |
| ASV_16s_685 | 8.875584609 | 0.26883004   | 1.231113301 | 30.23931401 | 8.58E-05    | 0.001417389 |
| ASV_16s_686 | 11.90038087 | -8.155903303 | 3.552157344 | 2.380062773 | NA          | NA          |
| ASV_16s_687 | 2.531589164 | -30          | 3.550316075 | 2.822704939 | NA          | NA          |
| ASV_16s_688 | 8.64891721  | 6.795900925  | 1.71768762  | 5.941395923 | 0.54660873  | 1           |
| ASV_16s_689 | 7.596302342 | -13.26463653 | 3.546499613 | 2.739924894 | NA          | NA          |
| ASV_16s_690 | 2.063788553 | -2.185283719 | 3.035523071 | 2.294625486 | 0.94175255  | 1           |
| ASV_16s_691 | 9.442478404 | 23.56502344  | 3.344654751 | 2.831357998 | 0.90015237  | 1           |
| ASV_16s_692 | 8.290980623 | 7.452314216  | 1.760767897 | 6.445602987 | 0.488784568 | 1           |
| ASV_16s_693 | 7.361945226 | 10.4964844   | 3.228801437 | 3.688459397 | 0.814879704 | 1           |
| ASV_16s_694 | 2.070726949 | -3.19159367  | 3.55074429  | 2.619659483 | NA          | NA          |
| ASV_16s_695 | 8.23102138  | -1.340205666 | 1.624980852 | 8.210676798 | 0.314383882 | 1           |
| ASV_16s_696 | 4.055998984 | 0.186652871  | 2.711835817 | 4.22348783  | 0.753706217 | 1           |
| ASV_16s_697 | 5.066538841 | -30          | 3.550640582 | 2.219290704 | 0.94671297  | 1           |
| ASV_16s_698 | 10.11801847 | 0.682784214  | 2.294301313 | 12.84534635 | 0.07596736  | 0.43074494  |
| ASV_16s_699 | 8.951644153 | -1.423153162 | 1.499484434 | 21.85404495 | 0.002691822 | 0.029093313 |
| ASV_16s_700 | 9.386148511 | -0.036821223 | 1.993360931 | 13.52248464 | 0.060356182 | 0.370868823 |
| ASV_16s_701 | 6.44865683  | -2.4650542   | 2.127954666 | 6.940011603 | 0.435152483 | 1           |
| ASV_16s_702 | 8.78338679  | 6.486505817  | 1.752390899 | 11.48378757 | 0.11886441  | 0.588488215 |
| ASV_16s_703 | 7.42443443  | 11.25470245  | 3.503202848 | 3.741480101 | 0.809025749 | 1           |
| ASV_16s_704 | 7.297336668 | 2.500538513  | 1.656379473 | 6.90654583  | 0.438674793 | 1           |
| ASV_16s_705 | 9.665414691 | 29.95812224  | 1.793041531 | 7.500596085 | 0.378679474 | 1           |
| ASV_16s_706 | 7.557386041 | 3.214721528  | 1.66879007  | 13.09053151 | 0.06993309  | 0.411813304 |
| ASV_16s_707 | 8.216672436 | 2.408776682  | 1.399456172 | 10.36911042 | 0.168603265 | 0.74623127  |
| ASV_16s_708 | 8.231361352 | 1.821857467  | 1.470756405 | 16.10203936 | 0.02420029  | 0.180273546 |
| ASV_16s_709 | 11.72580229 | -25.64295709 | 3.549013571 | 2.14181103  | NA          | NA          |
| ASV_16s_710 | 9.823884964 | 0.151265232  | 2.097980849 | 15.48235345 | 0.030290133 | 0.214721581 |
| ASV_16s_711 | 7.022671031 | 6.307721063  | 3.547371663 | 3.66460662  | 0.817495497 | 1           |
| ASV_16s_712 | 9.883974673 | 5.607884251  | 1.482428637 | 9.162450334 | 0.24120231  | 0.960445384 |
| ASV_16s_713 | 7.378638677 | -0.029766728 | 1.459350075 | 11.47708248 | 0.119120372 | 0.588551877 |
| ASV_16s_714 | 2.018832361 | -23.89417711 | 3.551438696 | 2.769123955 | NA          | NA          |
| ASV_16s_715 | 9.830044929 | 0.09166916   | 1.825255005 | 21.80238973 | 0.002747483 | 0.029302452 |
| ASV_16s_716 | 10.36431624 | 6.239991414  | 2.362695551 | 12.60371762 | 0.082372902 | 0.455307754 |
| ASV_16s_717 | 7.212883182 | 10.29951738  | 3.546736328 | 3.620904933 | 0.822258408 | 1           |
| ASV_16s_718 | 7.255862724 | 5.896757344  | 2.870969453 | 4.857673807 | 0.677326988 | 1           |
| ASV_16s_719 | 7.72940262  | 9.001210673  | 1.933215527 | 8.982507347 | 0.25391439  | 0.988306654 |
| ASV_16s_720 | 9.746094755 | 0.160305408  | 1.931027107 | 19.6629612  | 0.00634559  | 0.057972352 |
| ASV_16s_721 | 12.51051886 | -1.086619167 | 3.122295795 | 4.91475607  | 0.670365258 | 1           |
| ASV_16s_722 | 7.470443993 | 8.213645527  | 1.972068472 | 6.523690083 | 0.480095251 | 1           |
| ASV_16s_723 | 13.75398784 | 30           | 3.548332504 | 2.823771022 | NA          | NA          |
| ASV_16s_724 | 9.752831129 | 1.51943791   | 2.185923246 | 12.48696493 | 0.085639714 | 0.469080875 |
| ASV_16s_725 | 9.480790813 | 30           | 1.870679068 | 6.846093107 | 0.445078755 | 1           |
| ASV_16s_726 | 2.068314091 | -22.9416683  | 3.551440059 | 2.47205039  | NA          | NA          |
| ASV_16s_727 | 1.99150582  | -26.48620775 | 3.550874281 | 2.535773003 | NA          | NA          |
| ASV_16s_728 | 7.267991201 | 0.035813843  | 1.502295232 | 18.2923462  | 0.010718365 | 0.089172374 |
| ASV_16s_729 | 15.48700549 | 18.95409804  | 3.550579124 | 2.787893427 | NA          | NA          |
| ASV_16s_730 | 10.99411496 | 3.347442099  | 3.546753452 | 3.619851102 | 0.82237278  | 1           |
| ASV_16s_731 | 2.216964405 | -5.303120793 | 3.550846121 | 3.019449381 | 0.883197191 | 1           |
| ASV_16s_732 | 10.93925767 | -23.04434141 | 3.551050613 | 2.426429271 | NA          | NA          |
| ASV_16s_733 | 6.289684858 | 1.338765321  | 1.980125619 | 7.545422522 | 0.374376876 | 1           |
| ASV_16s_734 | 6.980240036 | -0.020742985 | 3.546483904 | 3.839082219 | 0.798114313 | 1           |
| ASV_16s_735 | 8.257749944 | -24.71203193 | 2.655148032 | 4.121128    | 0.765724951 | 1           |
| ASV_16s_736 | 8.473593388 | -30          | 2.726176481 | 5.578218926 | 0.589766722 | 1           |
| ASV_16s_737 | 2.20946408  | -24.3345658  | 3.551438423 | 2.053599511 | NA          | NA          |

|             |             |              |             |             |             |             |
|-------------|-------------|--------------|-------------|-------------|-------------|-------------|
| ASV_16s_738 | 7.028330977 | 9.247854817  | 1.643095164 | 13.3079851  | 0.064950594 | 0.389708047 |
| ASV_16s_739 | 7.374333612 | 5.207921161  | 1.998285881 | 11.02576317 | 0.137499185 | 0.651415906 |
| ASV_16s_740 | 2.599770463 | 0.158773527  | 3.550573501 | 4.70969946  | 0.695340757 | 1           |
| ASV_16s_741 | 6.545913831 | -9.814699057 | 3.549178717 | 2.950622444 | NA          | NA          |
| ASV_16s_742 | 7.989183149 | -0.831595812 | 1.864152628 | 5.731181065 | 0.571464977 | 1           |
| ASV_16s_743 | 2.227915683 | 0.062933626  | 3.550546149 | 5.569847881 | 0.590772811 | 1           |
| ASV_16s_744 | 7.557517944 | 10.12632247  | 2.330677355 | 5.800987218 | 0.563169919 | 1           |
| ASV_16s_745 | 8.649694819 | 0.214523893  | 1.990957892 | 10.55982085 | 0.159005151 | 0.72059013  |
| ASV_16s_746 | 9.651640803 | 5.370712411  | 1.41804487  | 8.500771375 | 0.290511099 | 1           |
| ASV_16s_747 | 9.658550734 | -0.757086334 | 3.545902182 | 3.304214451 | 0.855506964 | 1           |
| ASV_16s_748 | 5.409327655 | -3.528962862 | 2.978100471 | 3.770925104 | 0.805751953 | 1           |
| ASV_16s_749 | 7.900356484 | -4.987500742 | 1.916492992 | 12.36203861 | 0.089264184 | 0.483506725 |
| ASV_16s_750 | 8.266816086 | -0.475251677 | 1.423067736 | 24.96062348 | 7.71E-04    | 0.009672623 |
| ASV_16s_751 | 6.917942373 | 9.500297172  | 2.698035266 | 4.877383936 | 0.674923685 | 1           |
| ASV_16s_752 | 10.13255893 | 0.662250612  | 2.204846735 | 11.70335354 | 0.110746031 | 0.556995447 |
| ASV_16s_753 | 7.307534927 | -9.172960794 | 2.079794784 | 5.05363799  | 0.65341748  | 1           |
| ASV_16s_754 | 6.753446477 | -3.755074326 | 3.048726976 | 3.840814032 | 0.797919194 | 1           |
| ASV_16s_755 | 8.256471848 | -30          | 3.549158083 | 2.546176212 | 0.923579998 | 1           |
| ASV_16s_756 | 9.682697311 | -10.73604582 | 3.552157344 | 2.625473906 | 0.917356211 | 1           |
| ASV_16s_757 | 8.347409443 | 6.467505717  | 3.439973213 | 2.257752833 | 0.944208802 | 1           |
| ASV_16s_758 | 2.817903795 | -13.32336681 | 3.552157344 | 2.187248067 | NA          | NA          |
| ASV_16s_759 | 6.730987134 | 9.204578387  | 3.547781326 | 3.783576181 | 0.804340502 | 1           |
| ASV_16s_760 | 2.269321167 | -12.11942661 | 3.549705926 | 1.334220674 | NA          | NA          |
| ASV_16s_761 | 7.545431634 | 6.173706317  | 2.022832708 | 5.159594794 | 0.640494174 | 1           |
| ASV_16s_762 | 6.798727747 | 11.05550806  | 3.134077993 | 4.462663664 | 0.725208411 | 1           |
| ASV_16s_763 | 7.527178395 | 9.713268561  | 2.071396682 | 7.579620168 | 0.371116253 | 1           |
| ASV_16s_764 | 7.133733793 | 11.69493139  | 2.176187839 | 8.086418571 | 0.325035357 | 1           |
| ASV_16s_765 | 4.340676148 | -12.81059345 | 3.552157344 | 2.452347549 | 0.930642393 | 1           |
| ASV_16s_766 | 7.393326078 | 10.04278477  | 2.05944484  | 7.322570613 | 0.396084018 | 1           |
| ASV_16s_767 | 2.499091644 | 8.877219927  | 3.550185423 | 3.294707051 | 0.856467512 | 1           |
| ASV_16s_768 | 3.162518315 | -6.196139412 | 3.549969116 | 1.353423479 | 0.986955342 | 1           |
| ASV_16s_769 | 8.846079992 | -1.115976525 | 2.204955158 | 13.36431333 | 0.063714027 | 0.385763    |
| ASV_16s_770 | 2.905995575 | 15.12454334  | 3.551442881 | 1.597853755 | NA          | NA          |
| ASV_16s_771 | 7.913258026 | 0.223732279  | 1.649672843 | 20.69973563 | 0.004240928 | 0.042252206 |
| ASV_16s_772 | 10.15273518 | -1.696733786 | 1.989843212 | 6.997458151 | NA          | NA          |
| ASV_16s_773 | 6.340908796 | -3.43447537  | 3.545175917 | 2.233323787 | NA          | NA          |
| ASV_16s_774 | 7.532570395 | -8.010337915 | 2.265955351 | 5.379516016 | 0.613753445 | 1           |
| ASV_16s_775 | 7.520879604 | 3.067836132  | 1.727622381 | 7.007405655 | 0.42810919  | 1           |
| ASV_16s_776 | 5.678694978 | 17.05486808  | 3.549009076 | 2.031158724 | 0.958095674 | 1           |
| ASV_16s_777 | 6.089185755 | 0.464414287  | 1.763609129 | 6.595812352 | 0.472139694 | 1           |
| ASV_16s_778 | 7.561917036 | 0.675311517  | 2.19734492  | 10.28288219 | 0.173101503 | 0.764742224 |
| ASV_16s_779 | 7.911441718 | -30          | 3.089867517 | 4.226262416 | 0.753378777 | 1           |
| ASV_16s_780 | 7.319558056 | -6.758976671 | 2.345492922 | 6.033516582 | 0.53584129  | 1           |
| ASV_16s_781 | 6.469899501 | -9.418942465 | 3.549256313 | 3.728364735 | 0.810478779 | 1           |
| ASV_16s_782 | 7.321402994 | 4.805579274  | 1.872811674 | 7.261142716 | 0.402205713 | 1           |
| ASV_16s_783 | 6.051723659 | 3.718441404  | 3.54683261  | 3.656971295 | 0.818330432 | 1           |
| ASV_16s_784 | 8.592446521 | -7.522958136 | 3.438334497 | 1.955523299 | 0.962260945 | 1           |
| ASV_16s_785 | 2.898041792 | -10.73418869 | 3.547981015 | 2.341042353 | 0.938583829 | 1           |
| ASV_16s_786 | 9.217750938 | -1.13799684  | 1.872644448 | 16.18167609 | 0.023507393 | 0.175652465 |
| ASV_16s_787 | 2.180331309 | -23.11922972 | 3.550595007 | 1.824135056 | NA          | NA          |
| ASV_16s_788 | 9.055347105 | 0.211361524  | 2.029775702 | 14.54790503 | 0.042251555 | 0.274867208 |
| ASV_16s_789 | 10.83661805 | 8.766326326  | 2.560412607 | 8.229214529 | 0.312816737 | 1           |
| ASV_16s_790 | 6.597370885 | -6.923178808 | 3.09391458  | 4.32392096  | 0.741803113 | 1           |
| ASV_16s_791 | 6.572893223 | 1.500030276  | 2.43623955  | 3.509548332 | 0.834213101 | 1           |
| ASV_16s_792 | 7.58427634  | -9.27673168  | 1.976437428 | 5.862205816 | 0.555928042 | 1           |
| ASV_16s_793 | 7.054095513 | 8.103115211  | 1.787672606 | 9.2687877   | 0.233929966 | 0.948650667 |
| ASV_16s_794 | 7.868304194 | 0.434083822  | 1.737281448 | 8.653713817 | 0.27848304  | 1           |
| ASV_16s_795 | 4.191416442 | -14.01575632 | 3.552157344 | 2.43087425  | 0.932211738 | 1           |
| ASV_16s_796 | 6.464163728 | -9.007928472 | 3.549233082 | 3.726279771 | 0.810709471 | 1           |
| ASV_16s_797 | 9.106190942 | -5.725721772 | 2.573590251 | 4.257032567 | 0.749741967 | 1           |
| ASV_16s_798 | 6.419939638 | 1.850492872  | 1.960576608 | 5.14318131  | 0.64249505  | 1           |
| ASV_16s_799 | 2.054316759 | -24.46701064 | 3.551438493 | 2.008890747 | NA          | NA          |
| ASV_16s_800 | 1.9541754   | -2.758935206 | 3.549977724 | 1.858899105 | NA          | NA          |
| ASV_16s_801 | 6.150507822 | 5.884248975  | 2.728087583 | 5.842288869 | 0.558280644 | 1           |
| ASV_16s_802 | 9.32676077  | -0.011165674 | 1.86094145  | 12.71009114 | 0.079495008 | 0.444115414 |
| ASV_16s_803 | 1.156754137 | -23.16211601 | 3.551439253 | 1.656390076 | NA          | NA          |
| ASV_16s_804 | 10.54539313 | 1.707118463  | 2.271072723 | 10.67420177 | 0.15347503  | 0.702387612 |

|             |             |              |             |             |             |             |  |
|-------------|-------------|--------------|-------------|-------------|-------------|-------------|--|
| ASV_16s_805 | 10.40164406 | -13.88850478 | 3.552157344 | 2.638230724 | NA          | NA          |  |
| ASV_16s_806 | 6.69900918  | 1.792973423  | 1.187026235 | 24.7687593  | 8.34E-04    | 0.010299594 |  |
| ASV_16s_807 | 6.158000482 | 1.437485148  | 1.873754512 | 11.1810314  | 0.130915135 | 0.627614935 |  |
| ASV_16s_808 | 8.060842564 | 1.113052761  | 2.577435081 | 5.489876536 | 0.600405232 | 1           |  |
| ASV_16s_809 | 8.803434548 | 4.246158253  | 2.322729093 | 5.194259466 | 0.636270129 | 1           |  |
| ASV_16s_810 | 9.292203426 | -5.629899105 | 2.359412039 | 7.647682232 | 0.36468313  | 1           |  |
| ASV_16s_811 | 6.522648171 | -2.305174831 | 2.615413941 | 5.982674416 | 0.54177383  | 1           |  |
| ASV_16s_812 | 7.528660595 | 0.037222135  | 2.239745474 | 8.157791342 | 0.318885995 | 1           |  |
| ASV_16s_813 | 9.152161697 | 0.220232753  | 3.42395386  | 2.935533934 | 0.890901111 | 1           |  |
| ASV_16s_814 | 7.571297572 | 0.896469107  | 1.63770533  | 14.90740492 | 0.037204826 | 0.253013718 |  |
| ASV_16s_815 | 6.629283373 | 6.091360895  | 1.790179321 | 9.330580527 | 0.22978493  | 0.934523719 |  |
| ASV_16s_816 | 8.877567398 | -0.764904681 | 1.321631759 | 29.06173062 | 1.41E-04    | 0.002174031 |  |
| ASV_16s_817 | 2.371376954 | 0.335326478  | 3.550589244 | 4.584290302 | 0.710544968 | 1           |  |
| ASV_16s_818 | 8.218611127 | 0.229219628  | 1.940994677 | 11.87422739 | 0.104771573 | 0.539685062 |  |
| ASV_16s_819 | 7.56796102  | -28.2860914  | 2.818213626 | 4.335700974 | 0.740400525 | 1           |  |
| ASV_16s_820 | 6.272731556 | -9.312030392 | 3.54920621  | 3.971207036 | 0.78308777  | 1           |  |
| ASV_16s_821 | 6.605205702 | 9.155252948  | 2.307016564 | 6.320002555 | 0.502920235 | 1           |  |
| ASV_16s_822 | 8.062838986 | -0.655987929 | 2.026104242 | 11.96234746 | 0.101803912 | 0.529097687 |  |
| ASV_16s_823 | 7.347422803 | -5.733954496 | 2.106084384 | 11.21899513 | 0.129347722 | 0.623806443 |  |
| ASV_16s_824 | 8.13357986  | 3.514453023  | 1.970737248 | 8.30814052  | 0.306208148 | 1           |  |
| ASV_16s_825 | 7.226474006 | 1.681727887  | 2.293017771 | 9.717967948 | 0.205127236 | 0.854755659 |  |
| ASV_16s_826 | 7.798077435 | -19.41140685 | 2.811748478 | 3.041640117 | 0.881123632 | 1           |  |
| ASV_16s_827 | 5.2407506   | 2.490604204  | 2.000797027 | 7.009562812 | 0.42788486  | 1           |  |
| ASV_16s_828 | 3.401155861 | 18.7323211   | 3.551439625 | 2.212024428 | 0.947179375 | 1           |  |
| ASV_16s_829 | 6.323558764 | -11.27434674 | 3.548594475 | 3.576456202 | 0.827062234 | 1           |  |
| ASV_16s_830 | 6.446493821 | 4.992450502  | 2.358238705 | 5.413839522 | 0.609595764 | 1           |  |
| ASV_16s_831 | 10.16814639 | 1.054601353  | 2.192785407 | 16.48719258 | 0.021019545 | 0.15952451  |  |
| ASV_16s_832 | 8.301201449 | 2.808475086  | 2.446944027 | 7.265270713 | 0.401792481 | 1           |  |
| ASV_16s_833 | 9.018986603 | -20.15296822 | 3.552157344 | 2.586292458 | 0.920460213 | 1           |  |
| ASV_16s_834 | 7.318998066 | 3.616353414  | 1.739320098 | 5.707006291 | 0.574346441 | 1           |  |
| ASV_16s_835 | 6.585610762 | 0.897365695  | 1.702256289 | 17.36288477 | 0.01520028  | 0.122258733 |  |
| ASV_16s_836 | 7.491671895 | -0.209842675 | 1.811188487 | 13.82334577 | 0.054414017 | 0.337785474 |  |
| ASV_16s_837 | 8.04787955  | -1.268667451 | 1.61616323  | 14.32690434 | 0.045663299 | 0.29169089  |  |
| ASV_16s_838 | 7.274975047 | 4.057342214  | 1.30359108  | 17.23580409 | 0.015937339 | 0.126922031 |  |
| ASV_16s_839 | 8.899811189 | -0.233800269 | 2.184239613 | 9.03802976  | 0.249937189 | 0.974392809 |  |
| ASV_16s_840 | 2.148054303 | -25.23551196 | 3.549519716 | 1.522236736 | NA          | NA          |  |
| ASV_16s_841 | 7.242992851 | -1.814364395 | 1.760312409 | 14.11594197 | 0.049157222 | 0.310730118 |  |
| ASV_16s_842 | 4.18096654  | -13.02706928 | 3.552157344 | 1.924255562 | 0.963913346 | 1           |  |
| ASV_16s_843 | 7.831452216 | 20.28619943  | 3.550150675 | 2.650073403 | 0.915379006 | 1           |  |
| ASV_16s_844 | 5.572892839 | 9.195935635  | 1.979582372 | 7.468800415 | 0.381750904 | 1           |  |
| ASV_16s_845 | 7.213943639 | 0.825276769  | 1.232825814 | 10.81576469 | 0.146859612 | 0.678525039 |  |
| ASV_16s_846 | 8.907088315 | 0.496071319  | 2.130113765 | 14.86692249 | 0.037743606 | 0.255243772 |  |
| ASV_16s_847 | 6.661919363 | 10.32910373  | 2.066807863 | 6.893585818 | 0.440043237 | 1           |  |
| ASV_16s_848 | 6.176079842 | 1.026054554  | 1.774775907 | 14.56377961 | 0.042015858 | 0.274867208 |  |
| ASV_16s_849 | 6.728779745 | 4.824926871  | 1.594650743 | 15.96086439 | 0.025476324 | 0.187440675 |  |
| ASV_16s_850 | 9.523855445 | -24.13046595 | 3.552157344 | 2.04561264  | NA          | NA          |  |
| ASV_16s_851 | 2.44221579  | -22.6062625  | 3.551440886 | 2.523748591 | 0.92529818  | 1           |  |
| ASV_16s_852 | 6.065102904 | 9.878983381  | 3.547617596 | 3.570919628 | 0.82765767  | 1           |  |
| ASV_16s_853 | 6.312406884 | 10.05009518  | 1.921636351 | 7.688841235 | 0.360829379 | 1           |  |
| ASV_16s_854 | 5.236932172 | 1.999277753  | 2.620210798 | 3.927513374 | 0.788087615 | 1           |  |
| ASV_16s_855 | 1.905925034 | 0.022790624  | 3.550551302 | 3.950248804 | 0.785489636 | NA          |  |
| ASV_16s_856 | 7.915138344 | 2.399151616  | 1.292584537 | 15.3611152  | 0.031639195 | 0.222024614 |  |
| ASV_16s_857 | 7.60758716  | -0.24772998  | 1.943269339 | 8.31530068  | 0.305613717 | 1           |  |
| ASV_16s_858 | 4.228024027 | -26.9302288  | 3.54951909  | 1.919195271 | 0.964176933 | 1           |  |
| ASV_16s_859 | 7.858176449 | -0.707432085 | 2.154316006 | 13.07712071 | 0.070251505 | 0.411813304 |  |
| ASV_16s_860 | 6.432275104 | 1.535383128  | 1.716795943 | 15.72530571 | 0.027747981 | 0.199886966 |  |
| ASV_16s_861 | 6.828487562 | 5.132489942  | 1.781409294 | 13.36095623 | 0.063787116 | 0.385763    |  |
| ASV_16s_862 | 6.502266545 | -7.50049607  | 3.549809216 | 1.567634883 | 0.979875342 | 1           |  |
| ASV_16s_863 | 5.085694052 | 2.587460135  | 2.030711328 | 6.424202547 | 0.491179398 | 1           |  |
| ASV_16s_864 | 9.495540923 | 1.281208119  | 1.77718229  | 21.50895683 | 0.003085555 | 0.032060639 |  |
| ASV_16s_865 | 5.96938298  | 10.20607147  | 3.547023157 | 3.32122808  | 0.853782203 | 1           |  |
| ASV_16s_866 | 7.561042161 | 8.401092092  | 3.335210276 | 2.685240613 | 0.912514803 | 1           |  |
| ASV_16s_867 | 1.872448315 | -23.68016496 | 3.551439001 | 2.909727109 | 0.893225694 | NA          |  |
| ASV_16s_868 | 5.078092921 | 4.9779859    | 3.539620524 | 2.942591121 | 0.890261725 | 1           |  |
| ASV_16s_869 | 0.192405096 | 0.845470819  | 3.551280309 | 0.607431288 | 0.998950359 | NA          |  |
| ASV_16s_870 | 6.97607776  | -0.584523598 | 2.434616413 | 7.99137245  | 0.333355288 | 1           |  |
| ASV_16s_871 | 6.266489946 | -7.17817832  | 3.5498633   | 2.180799335 | 0.949159352 | 1           |  |

|             |             |              |             |             |             |             |
|-------------|-------------|--------------|-------------|-------------|-------------|-------------|
| ASV_16s_872 | 6.448017677 | -2.861269835 | 1.657435363 | 9.151552939 | 0.241957589 | 0.961181421 |
| ASV_16s_873 | 5.658458627 | 1.771471245  | 2.307839494 | 4.078873254 | 0.770649266 | 1           |
| ASV_16s_874 | 2.553258962 | 18.55014555  | 3.551440275 | 2.036131443 | NA          | NA          |
| ASV_16s_875 | 6.040227477 | 11.36525034  | 2.854992982 | 4.985839122 | 0.661691439 | 1           |
| ASV_16s_876 | 6.657553935 | -2.820094063 | 1.844221852 | 12.70561515 | 0.079614246 | 0.444115414 |
| ASV_16s_877 | 6.614447267 | 5.336329995  | 2.670250371 | 5.141134866 | 0.642744553 | 1           |
| ASV_16s_878 | 5.463874804 | 2.400751806  | 2.455729712 | 5.104409803 | 0.647223189 | 1           |
| ASV_16s_879 | 5.147333572 | 7.340693879  | 3.018685509 | 1.924703616 | 0.963889955 | 1           |
| ASV_16s_880 | 6.490245006 | 1.235097631  | 1.653180065 | 11.3255225  | 0.125036709 | 0.607859181 |
| ASV_16s_881 | 4.594359869 | -0.316542065 | 2.576858022 | 4.306588679 | 0.743864428 | 1           |
| ASV_16s_882 | 3.879635984 | -24.11029627 | 3.550982472 | 2.142926116 | 0.951507774 | 1           |
| ASV_16s_883 | 1.510310243 | 0.737892815  | 3.547600617 | 1.885193761 | 0.965920335 | NA          |
| ASV_16s_884 | 3.144769695 | -21.52548059 | 3.551443663 | 2.416829169 | 0.933228631 | 1           |
| ASV_16s_885 | 3.127991831 | -20.49702339 | 3.551445857 | 2.246466783 | 0.944949762 | 1           |
| ASV_16s_886 | 6.323343046 | 10.0519848   | 3.233437314 | 3.20715843  | 0.865199924 | 1           |
| ASV_16s_887 | 7.051548957 | -2.442108906 | 1.621523937 | 12.09192068 | 0.097576241 | 0.519090802 |
| ASV_16s_888 | 6.205416982 | 6.403432192  | 1.320736947 | 15.47847706 | 0.030332417 | 0.214721581 |
| ASV_16s_889 | 7.184168543 | 2.487999562  | 2.285654166 | 3.047933586 | 0.880532841 | 1           |
| ASV_16s_890 | 3.964233076 | -9.362523121 | 3.547782358 | 2.401585181 | 0.93432372  | 1           |
| ASV_16s_891 | 4.790505106 | 9.445167209  | 3.500409713 | 2.11139343  | 0.953418381 | 1           |
| ASV_16s_892 | 6.081862552 | 9.337974144  | 2.130431898 | 7.317095145 | 0.396627282 | 1           |
| ASV_16s_893 | 6.187277466 | 0.911807238  | 2.457508594 | 3.680533847 | 0.815750096 | 1           |
| ASV_16s_894 | 1.923650165 | -22.42596876 | 3.55059769  | 1.755050619 | NA          | NA          |
| ASV_16s_895 | 6.348645447 | 0.187393501  | 3.549390143 | 2.93893908  | 0.8905928   | 1           |
| ASV_16s_896 | 8.04171169  | -9.670303324 | 3.15222446  | 2.668657089 | 0.913870938 | 1           |
| ASV_16s_897 | 7.095862008 | -1.027546126 | 1.43340613  | 18.41861497 | 0.010217497 | 0.086190103 |
| ASV_16s_898 | 5.702194277 | 10.00111164  | 3.54713891  | 3.322921057 | 0.85361017  | 1           |
| ASV_16s_899 | 6.36492535  | 9.364702384  | 1.722685237 | 9.747268502 | 0.203353626 | 0.853239389 |
| ASV_16s_900 | 4.186693314 | -1.495440718 | 1.931301095 | 3.407907861 | 0.844881359 | 1           |
| ASV_16s_901 | 1.910524425 | -22.93626362 | 3.550597884 | 1.751274046 | NA          | NA          |
| ASV_16s_902 | 1.827556076 | -5.272139995 | 3.550890622 | 2.929546719 | 0.891442315 | NA          |
| ASV_16s_903 | 6.46169703  | -1.971306897 | 1.963363919 | 9.201027536 | 0.238543587 | 0.955141038 |
| ASV_16s_904 | 5.641780332 | 9.097456999  | 1.960142046 | 8.199911555 | 0.315296568 | 1           |
| ASV_16s_905 | 6.483088545 | 8.726133541  | 2.488995516 | 3.421797437 | 0.843437877 | 1           |
| ASV_16s_906 | 7.422203017 | 8.83164328   | 3.380409101 | 2.272168046 | 0.943254994 | 1           |
| ASV_16s_907 | 6.68980692  | 9.2945253    | 1.546921457 | 12.0708043  | 0.098254342 | 0.520511512 |
| ASV_16s_908 | 6.333084597 | -2.180202736 | 1.665309958 | 4.200417882 | 0.756425528 | 1           |
| ASV_16s_909 | 1.893023437 | -22.83617857 | 3.550598077 | 1.746198872 | NA          | NA          |
| ASV_16s_910 | 5.761384371 | 11.5151877   | 2.881585478 | 4.551398847 | 0.714519473 | 1           |
| ASV_16s_911 | 6.644282758 | 5.180511836  | 2.135138883 | 7.355766586 | 0.39280049  | 1           |
| ASV_16s_912 | 7.16023489  | 4.427304384  | 1.222553047 | 10.23909522 | 0.175424201 | 0.767996367 |
| ASV_16s_913 | 9.237644882 | 25.61232665  | 3.549059977 | 2.32498507  | NA          | NA          |
| ASV_16s_914 | 5.546542811 | -11.52631601 | 2.786432882 | 3.859041198 | 0.795862511 | 1           |
| ASV_16s_915 | 6.024549762 | 1.28461639   | 1.64994926  | 19.98167199 | 0.005609407 | 0.053258234 |
| ASV_16s_916 | 1.075114593 | -23.45933392 | 3.550811101 | 0.161352125 | NA          | NA          |
| ASV_16s_917 | 6.211492996 | 9.388788362  | 2.247726258 | 5.44388992  | 0.605960155 | 1           |
| ASV_16s_918 | 3.990678498 | 17.60096803  | 3.551441076 | 2.351444388 | NA          | NA          |
| ASV_16s_919 | 5.492041426 | -0.545771105 | 1.905592052 | 12.17037226 | 0.095093463 | 0.511602833 |
| ASV_16s_920 | 3.984476978 | 17.59967657  | 3.551441081 | 2.350490013 | NA          | NA          |
| ASV_16s_921 | 5.260455533 | 1.466711271  | 1.994935199 | 13.08349509 | 0.070099993 | 0.411813304 |
| ASV_16s_922 | 5.732749724 | 6.38398463   | 3.451424781 | 3.049862235 | 0.880351553 | 1           |
| ASV_16s_923 | 5.812215144 | 8.62879715   | 2.291495253 | 6.170360067 | 0.520004273 | 1           |
| ASV_16s_924 | 6.261204841 | -1.447282608 | 2.049186537 | 10.25136859 | 0.174770524 | 0.76652072  |
| ASV_16s_925 | 6.395063966 | -1.342254159 | 2.363485943 | 7.668155197 | 0.36276278  | 1           |
| ASV_16s_926 | 8.821840869 | -17.08187859 | 3.552157344 | 2.034093112 | NA          | NA          |
| ASV_16s_927 | 6.142304395 | 4.59610835   | 2.019853013 | 6.024939679 | 0.536840308 | 1           |
| ASV_16s_928 | 5.672318208 | 8.885506635  | 3.156453871 | 3.185215501 | 0.867355926 | 1           |
| ASV_16s_929 | 5.971898072 | 2.63124015   | 1.780837839 | 8.023689977 | 0.330509581 | 1           |
| ASV_16s_930 | 5.820617885 | -11.23492819 | 3.54862086  | 3.253001435 | 0.860653019 | 1           |
| ASV_16s_931 | 7.429177549 | 0.653224003  | 1.512529153 | 22.25909669 | 0.002291805 | 0.025220268 |
| ASV_16s_932 | 5.221790025 | 0.158822435  | 1.711520855 | 6.4510513   | 0.488175785 | 1           |
| ASV_16s_933 | 7.225788231 | 6.025688716  | 1.68938856  | 4.111853453 | 0.766807742 | 1           |
| ASV_16s_934 | 7.139471912 | -4.399451986 | 3.549632594 | 2.713720874 | 0.910163134 | 1           |
| ASV_16s_935 | 6.109287874 | -1.645119911 | 1.439748375 | 15.31960072 | 0.032113977 | 0.224057459 |
| ASV_16s_936 | 6.378984336 | -11.20587989 | 2.597490284 | 4.669185763 | 0.700260256 | 1           |
| ASV_16s_937 | 7.196255917 | -0.361040903 | 2.094381715 | 7.89348712  | 0.342079822 | 1           |
| ASV_16s_938 | 4.851407722 | 3.38111848   | 1.854743857 | 7.099415937 | 0.418602706 | 1           |

|              |             |              |             |             |             |             |
|--------------|-------------|--------------|-------------|-------------|-------------|-------------|
| ASV_16s_939  | 7.39707626  | -0.040933383 | 1.899225259 | 10.66606617 | 0.153862861 | 0.702833938 |
| ASV_16s_940  | 3.130414518 | 0.840051764  | 2.616375045 | 4.644772106 | 0.70322141  | 1           |
| ASV_16s_941  | 3.341985078 | 0.026354757  | 1.668822718 | 8.587600006 | 0.283635456 | 1           |
| ASV_16s_942  | 6.547847483 | -30          | 2.713193743 | 5.172056102 | 0.638975422 | 1           |
| ASV_16s_943  | 5.842140408 | 7.89132023   | 2.084598101 | 6.305288052 | 0.504588708 | 1           |
| ASV_16s_944  | 6.653009525 | 4.138559561  | 1.574029658 | 12.7995162  | 0.07714644  | 0.435364875 |
| ASV_16s_945  | 6.944456214 | -1.451224035 | 1.228391666 | 25.1614901  | 7.10E-04    | 0.009051527 |
| ASV_16s_946  | 7.140503078 | -10.8798067  | 3.552157344 | 2.23876231  | 0.945452649 | 1           |
| ASV_16s_947  | 5.673233951 | 3.319466709  | 1.348035099 | 14.47297206 | 0.043380834 | 0.278580897 |
| ASV_16s_948  | 7.869787666 | 2.977158868  | 2.618269256 | 6.263651382 | 0.509323593 | 1           |
| ASV_16s_949  | 6.659654521 | 2.009076977  | 1.306255424 | 29.88026842 | 9.99E-05    | 0.001612118 |
| ASV_16s_950  | 7.099033906 | -15.90505576 | 3.552157344 | 1.642458771 | 0.976964211 | 1           |
| ASV_16s_951  | 3.650122034 | 0.951801937  | 1.911497103 | 12.80953314 | 0.076887323 | 0.434916377 |
| ASV_16s_952  | 6.170836367 | -25.29750039 | 3.549027954 | 1.85027126  | 0.967660689 | 1           |
| ASV_16s_953  | 6.345714955 | -3.057246539 | 1.876147272 | 5.522845731 | 0.596429692 | 1           |
| ASV_16s_955  | 6.750666946 | 5.972929835  | 2.040431396 | 7.047676183 | 0.423932786 | 1           |
| ASV_16s_956  | 8.157782192 | 16.79501277  | 3.549589391 | 2.749666364 | NA          | NA          |
| ASV_16s_957  | 5.953056762 | 11.40543771  | 2.436324308 | 6.816145882 | 0.448270629 | 1           |
| ASV_16s_958  | 7.549090923 | 1.587449503  | 2.793207504 | 7.461154644 | 0.382491894 | 1           |
| ASV_16s_959  | 5.478597611 | 11.14650469  | 2.486876866 | 5.840628289 | 0.558476946 | 1           |
| ASV_16s_960  | 5.398614241 | -10.8661727  | 3.548714294 | 3.359541798 | 0.849871051 | 1           |
| ASV_16s_961  | 5.99605441  | -0.473288911 | 1.551699311 | 20.74758343 | 0.004162265 | 0.041639853 |
| ASV_16s_962  | 2.948014095 | 0.071026746  | 3.549214159 | 0.734139912 | NA          | NA          |
| ASV_16s_963  | 4.991405681 | 11.20979852  | 3.547304364 | 2.817682787 | 0.901340263 | 1           |
| ASV_16s_964  | 6.008850721 | -1.04502423  | 2.018449539 | 6.28643726  | 0.506729907 | 1           |
| ASV_16s_965  | 6.017548282 | -3.033327658 | 1.457476687 | 8.965426894 | 0.2551478   | 0.99151336  |
| ASV_16s_966  | 6.675993884 | 0.355442566  | 2.24685195  | 14.38549926 | 0.044734603 | 0.286514478 |
| ASV_16s_967  | 5.534306532 | 7.057225524  | 3.432530016 | 3.13417513  | 0.872318634 | 1           |
| ASV_16s_968  | 5.293473143 | 1.634274201  | 2.331385318 | 2.076983299 | 0.955456809 | 1           |
| ASV_16s_969  | 1.758392653 | 10.07435599  | 3.549346474 | 2.215756517 | NA          | NA          |
| ASV_16s_970  | 6.035121442 | -3.364921746 | 2.33052323  | 3.829255657 | 0.799220475 | 1           |
| ASV_16s_971  | 6.168963171 | 1.236140631  | 1.880892946 | 14.51824176 | 0.042695282 | 0.275640743 |
| ASV_16s_972  | 1.391218765 | -23.82285913 | 3.551438957 | 1.76962132  | NA          | NA          |
| ASV_16s_973  | 7.344307188 | 3.694139508  | 3.550744318 | 5.271780654 | 0.626834421 | 1           |
| ASV_16s_974  | 7.582279539 | 8.245603344  | 2.583883835 | 6.480239096 | 0.484920777 | 1           |
| ASV_16s_975  | 5.977306919 | 7.786811856  | 2.257053939 | 5.263246827 | 0.627872309 | 1           |
| ASV_16s_976  | 5.296712848 | -9.062204678 | 3.549195009 | 3.858342925 | 0.795941404 | 1           |
| ASV_16s_977  | 5.725796651 | 5.639921497  | 2.548018281 | 6.764689555 | 0.453784754 | 1           |
| ASV_16s_978  | 5.523781212 | -3.100260336 | 2.555944336 | 5.821958679 | 0.560685544 | 1           |
| ASV_16s_979  | 5.424166328 | 7.517072781  | 2.349201865 | 4.225179037 | 0.753506641 | 1           |
| ASV_16s_980  | 5.732642816 | -11.60165786 | 3.54852357  | 3.349477881 | 0.850901997 | 1           |
| ASV_16s_981  | 8.631597448 | -5.337052575 | 3.549580358 | 3.772743695 | 0.805549235 | 1           |
| ASV_16s_982  | 0.142133901 | 0.077675893  | 3.551026924 | 0.675411997 | NA          | NA          |
| ASV_16s_983  | 3.379643345 | -9.052486779 | 3.552157344 | 2.298767997 | 0.941473219 | 1           |
| ASV_16s_984  | 5.164413529 | 9.300614705  | 3.547799906 | 3.103010016 | 0.875312191 | 1           |
| ASV_16s_985  | 5.227324958 | 9.796627442  | 2.564560157 | 4.25346006  | 0.750164722 | 1           |
| ASV_16s_986  | 7.418812393 | 4.37515022   | 1.855108671 | 12.89742615 | 0.074647374 | 0.426229462 |
| ASV_16s_987  | 1.885646463 | 0.086907721  | 3.550563621 | 3.846723055 | 0.797253057 | NA          |
| ASV_16s_988  | 5.927612321 | 6.870629659  | 2.926587059 | 3.168665146 | 0.868973202 | 1           |
| ASV_16s_989  | 5.545611587 | 4.628864604  | 2.273251111 | 5.755843343 | 0.568529983 | 1           |
| ASV_16s_990  | 5.065883571 | 1.280716145  | 1.375556607 | 25.38947098 | 6.47E-04    | 0.00839082  |
| ASV_16s_991  | 3.950465792 | 0.436430719  | 3.357323225 | 1.428389369 | NA          | NA          |
| ASV_16s_992  | 6.907812423 | -9.996792022 | 3.550022633 | 5.157209255 | 0.640784951 | 1           |
| ASV_16s_993  | 6.898556008 | -0.629619001 | 2.285630098 | 13.31763844 | 0.064737127 | 0.389708047 |
| ASV_16s_994  | 4.965170226 | -26.87758078 | 3.550588882 | 3.083438437 | 0.877177655 | 1           |
| ASV_16s_995  | 5.562713001 | 9.433086685  | 2.241654302 | 5.729767039 | 0.571633398 | 1           |
| ASV_16s_996  | 4.638599509 | -0.622427369 | 2.309222856 | 8.555111847 | 0.28619358  | 1           |
| ASV_16s_997  | 6.605578018 | 0.479352444  | 1.349451726 | 19.89621231 | 0.005798279 | 0.053990899 |
| ASV_16s_998  | 6.69764454  | 0.862974151  | 2.927379219 | 4.553377439 | 0.714280563 | 1           |
| ASV_16s_999  | 1.413782429 | -23.37197269 | 3.551439478 | 1.911190319 | NA          | NA          |
| ASV_16s_1000 | 6.506426829 | 11.17035516  | 2.972396548 | 4.159481851 | 0.761235955 | 1           |
| ASV_16s_1001 | 5.290945157 | 5.175090236  | 2.58678699  | 5.843608874 | 0.558124619 | 1           |
| ASV_16s_1002 | 6.830749714 | 5.746954247  | 2.678883639 | 4.901597686 | 0.671970441 | 1           |
| ASV_16s_1003 | 6.753348173 | -9.785230209 | 3.548281462 | 1.204883736 | NA          | NA          |
| ASV_16s_1004 | 1.852625339 | -23.46071875 | 3.55143944  | 2.364469171 | 0.936952361 | NA          |
| ASV_16s_1005 | 5.159266943 | 10.15977023  | 2.68847876  | 4.21512939  | 0.754692124 | 1           |
| ASV_16s_1006 | 5.991130928 | -1.014713767 | 2.504664571 | 5.866297414 | 0.555445165 | 1           |

|              |             |              |             |             |             |             |
|--------------|-------------|--------------|-------------|-------------|-------------|-------------|
| ASV_16s_1007 | 5.437638534 | 3.880658796  | 1.49824789  | 9.952839894 | 0.19126178  | 0.816657443 |
| ASV_16s_1008 | 6.055081    | -3.338371839 | 1.984293877 | 8.370587857 | 0.301052355 | 1           |
| ASV_16s_1009 | 7.331716069 | 8.466747209  | 2.94611638  | 4.784008352 | 0.686302244 | 1           |
| ASV_16s_1010 | 7.182763334 | 2.556666669  | 3.54815317  | 4.419906493 | 0.730339181 | 1           |
| ASV_16s_1011 | 2.183111953 | 18.45128564  | 3.551440722 | 1.940023522 | NA          | NA          |
| ASV_16s_1012 | 1.044958918 | -23.31348735 | 3.551439437 | 0.3001291   | NA          | NA          |
| ASV_16s_1013 | 5.267171438 | 4.771857256  | 2.028403159 | 10.92615323 | 0.141872776 | 0.668237336 |
| ASV_16s_1014 | 6.005194662 | -29.99430068 | 2.53812185  | 4.99146247  | 0.661005162 | 1           |
| ASV_16s_1015 | 6.621518506 | -5.603990282 | 2.429770497 | 6.236784852 | 0.512389437 | 1           |
| ASV_16s_1016 | 3.155242562 | 18.68787749  | 3.551439775 | 2.165985717 | 0.950084857 | 1           |
| ASV_16s_1017 | 7.016884834 | 1.372895112  | 2.99418381  | 5.560534175 | 0.591892701 | 1           |
| ASV_16s_1018 | 6.505449344 | 0.334850498  | 2.535772554 | 4.868444076 | 0.676013823 | 1           |
| ASV_16s_1019 | 5.317488516 | 0.350168764  | 2.419542214 | 4.486822461 | 0.722303486 | 1           |
| ASV_16s_1020 | 4.798590617 | 6.830835994  | 1.907906202 | 3.241396324 | 0.86180945  | 1           |
| ASV_16s_1021 | 5.676085724 | -0.309901504 | 1.853426101 | 12.40246282 | 0.08807653  | 0.481339231 |
| ASV_16s_1022 | 5.35815965  | -0.727380639 | 3.552157344 | 1.572549585 | NA          | NA          |
| ASV_16s_1023 | 5.568399754 | -5.729873582 | 2.065844644 | 9.738197502 | 0.203901358 | 0.854057419 |
| ASV_16s_1024 | 6.598030896 | 1.004711694  | 1.818704884 | 15.79780333 | 0.02702924  | 0.195921527 |
| ASV_16s_1025 | 5.384992167 | 9.359560188  | 1.901439192 | 7.708624671 | 0.358986868 | 1           |
| ASV_16s_1026 | 5.708267185 | -1.16639138  | 2.23168923  | 6.548607141 | 0.477339035 | 1           |
| ASV_16s_1027 | 5.041687546 | -3.681075058 | 1.93409041  | 3.006999939 | 0.884353925 | 1           |
| ASV_16s_1028 | 5.977854805 | -30          | 3.074424668 | 3.868467925 | 0.794796652 | 1           |
| ASV_16s_1029 | 5.929303469 | -30          | 3.549881479 | 2.872763475 | 0.896517815 | 1           |
| ASV_16s_1030 | 6.076602146 | 2.261842158  | 1.821317975 | 8.249040234 | 0.311147005 | 1           |
| ASV_16s_1031 | 6.154137779 | -0.045197013 | 2.634367582 | 6.782579204 | 0.451863438 | 1           |
| ASV_16s_1032 | 6.458052747 | -5.384289643 | 2.718128693 | 3.951107678 | 0.785391337 | 1           |
| ASV_16s_1033 | 4.296241309 | -0.086283212 | 1.581130409 | 17.35155941 | 0.015264623 | 0.122369709 |
| ASV_16s_1034 | 4.780311545 | 3.77095424   | 2.210830976 | 5.063172165 | 0.652254112 | 1           |
| ASV_16s_1035 | 4.964209005 | 7.880436322  | 3.546550845 | 2.649731905 | 0.915406603 | 1           |
| ASV_16s_1036 | 4.987732125 | 7.02615669   | 2.084102067 | 5.998921897 | 0.539875241 | 1           |
| ASV_16s_1037 | 6.146566171 | 9.711488687  | 3.01050135  | 3.427648586 | 0.842828404 | 1           |
| ASV_16s_1038 | 5.84119282  | -2.892234978 | 2.265424483 | 4.287417417 | 0.7461411   | 1           |
| ASV_16s_1039 | 6.353804559 | 2.135599295  | 1.584021336 | 7.923539719 | 0.339384405 | 1           |
| ASV_16s_1040 | 4.790197402 | -7.948864029 | 3.438422276 | 0.792419272 | NA          | NA          |
| ASV_16s_1041 | 6.710862704 | -24.27435797 | 3.55072921  | 3.248388067 | NA          | NA          |
| ASV_16s_1042 | 4.411654897 | 18.27324814  | 3.550727716 | 3.43803966  | NA          | NA          |
| ASV_16s_1043 | 5.040848331 | 11.43082462  | 2.907592204 | 3.811791533 | 0.801182281 | 1           |
| ASV_16s_1044 | 5.709022671 | -9.233345288 | 2.790507758 | 4.626789389 | 0.705400794 | 1           |
| ASV_16s_1045 | 2.361056313 | -2.292963017 | 3.550785813 | 3.031655483 | 0.882058472 | 1           |
| ASV_16s_1046 | 5.354460687 | -9.794283156 | 2.748555692 | 4.2086689   | 0.755453636 | 1           |
| ASV_16s_1047 | 5.04215385  | 9.205170924  | 2.347854552 | 4.814625829 | 0.68257338  | 1           |
| ASV_16s_1048 | 1.623216553 | -22.8583552  | 3.550601981 | 1.661400376 | NA          | NA          |
| ASV_16s_1049 | 6.517930784 | -0.152797758 | 2.035577339 | 7.288443212 | 0.399477744 | 1           |
| ASV_16s_1050 | 5.298407147 | 0.85459373   | 1.78047436  | 13.86259337 | 0.053679934 | 0.334416596 |
| ASV_16s_1051 | 5.634778026 | -1.050018176 | 2.401586573 | 5.974655817 | 0.542711775 | 1           |
| ASV_16s_1052 | 1.929775982 | -20.59844958 | 3.551451388 | 1.649923475 | NA          | NA          |
| ASV_16s_1053 | 4.794252809 | 8.493108175  | 3.54795809  | 3.356901345 | 0.850141785 | 1           |
| ASV_16s_1054 | 5.23579184  | 9.778187633  | 2.145555466 | 5.610444647 | 0.585897739 | 1           |
| ASV_16s_1055 | 3.224058898 | -8.585403065 | 3.552157344 | 2.269855623 | 0.943408558 | 1           |
| ASV_16s_1056 | 5.950044078 | -30          | 2.768704733 | 4.368682026 | 0.736466977 | 1           |
| ASV_16s_1057 | 6.382396156 | -1.131261965 | 2.141973232 | 5.401269744 | 0.611117758 | 1           |
| ASV_16s_1058 | 1.098985236 | 0.648344977  | 3.549944945 | 1.8820086   | 0.966081179 | NA          |
| ASV_16s_1059 | 4.831353497 | -8.92189799  | 3.549204672 | 3.706045257 | 0.812944034 | 1           |
| ASV_16s_1060 | 3.229251287 | 0.267284547  | 3.550111682 | 1.7328647   | 0.973137983 | 1           |
| ASV_16s_1061 | 6.27382758  | 1.634574115  | 2.83430483  | 4.653409068 | 0.702174131 | 1           |
| ASV_16s_1062 | 5.138164359 | 9.434487444  | 2.274275151 | 4.644918057 | 0.703203716 | 1           |
| ASV_16s_1063 | 7.222276023 | -10.34211365 | 3.552157344 | 2.455239237 | NA          | NA          |
| ASV_16s_1064 | 7.458500861 | 2.199486042  | 2.05865039  | 10.18409391 | 0.178378867 | 0.776718052 |
| ASV_16s_1065 | 4.898386433 | 11.40317303  | 3.545686358 | 2.840056149 | 0.89939356  | 1           |
| ASV_16s_1066 | 5.039491843 | 11.0556903   | 2.281435543 | 6.52822099  | 0.479593462 | 1           |
| ASV_16s_1067 | 5.578040465 | 0.66159333   | 1.611612203 | 9.696693964 | 0.206422915 | 0.858676764 |
| ASV_16s_1068 | 5.393561137 | 4.738225664  | 1.795853373 | 13.30431929 | 0.065031826 | 0.389708047 |
| ASV_16s_1069 | 5.034934169 | 11.79291834  | 2.505223855 | 5.360197558 | 0.616095774 | 1           |
| ASV_16s_1070 | 0.990675338 | -23.34095722 | 3.551439542 | 0.267403087 | NA          | NA          |
| ASV_16s_1071 | 3.158699854 | -30          | 3.55092242  | 1.786168643 | 0.970722581 | 1           |
| ASV_16s_1072 | 1.336444431 | -8.729459128 | 3.552157344 | 1.486056287 | NA          | NA          |
| ASV_16s_1073 | 5.154998435 | -11.31280811 | 3.548624352 | 2.955698257 | 0.889070023 | 1           |

|              |             |              |             |             |             |             |
|--------------|-------------|--------------|-------------|-------------|-------------|-------------|
| ASV_16s_1074 | 3.222371539 | -12.16199669 | 3.552157344 | 2.269504073 | 0.943431885 | 1           |
| ASV_16s_1075 | 6.563946465 | 5.237716624  | 2.475796906 | 5.611854175 | 0.585728665 | 1           |
| ASV_16s_1076 | 1.404623167 | -0.086807762 | 3.550535993 | 3.547543908 | 0.830164331 | NA          |
| ASV_16s_1077 | 5.520651196 | 6.286339445  | 2.537673157 | 6.566872757 | 0.475323719 | 1           |
| ASV_16s_1078 | 6.1750294   | 3.090058525  | 1.544897921 | 11.92742942 | 0.102970791 | 0.532675821 |
| ASV_16s_1079 | 6.156538867 | -1.926283038 | 1.975748573 | 15.32485765 | 0.032053488 | 0.224057459 |
| ASV_16s_1080 | 2.669224202 | -0.298938872 | 3.550794276 | 2.456885482 | 0.930308488 | 1           |
| ASV_16s_1081 | 6.735723368 | -3.902430049 | 2.65171688  | 3.563917926 | 0.82840973  | 1           |
| ASV_16s_1082 | 4.440655465 | 11.02136239  | 3.546416387 | 2.92374162  | 0.891965964 | 1           |
| ASV_16s_1083 | 4.548129719 | 2.252598072  | 1.684295253 | 10.02901301 | 0.18693528  | 0.803223968 |
| ASV_16s_1084 | 4.771600152 | 9.49429901   | 3.547386053 | 3.216076732 | 0.864319856 | 1           |
| ASV_16s_1085 | 4.632138724 | -1.470586989 | 2.200667668 | 3.724882197 | 0.81086406  | 1           |
| ASV_16s_1086 | 5.497238653 | -0.158592791 | 2.070973925 | 13.98981334 | 0.05136283  | 0.323826592 |
| ASV_16s_1087 | 5.699756523 | -1.596270122 | 1.607228785 | 10.68776199 | 0.152830463 | 0.700762408 |
| ASV_16s_1088 | 5.765546019 | -30          | 3.074991525 | 3.810823937 | 0.801290819 | 1           |
| ASV_16s_1089 | 6.024106199 | 0.669008358  | 2.610340084 | 6.430919922 | 0.49042707  | 1           |
| ASV_16s_1090 | 6.037873301 | -22.34581356 | 3.096513385 | 2.329441455 | 0.939383752 | 1           |
| ASV_16s_1091 | 5.556249065 | -0.303861932 | 1.98327809  | 8.333691045 | 0.304090847 | 1           |
| ASV_16s_1092 | 5.755418659 | -0.247759617 | 1.868494888 | 14.76764098 | 0.039095972 | 0.262425576 |
| ASV_16s_1093 | 4.141684354 | -12.76670968 | 3.546432236 | 2.674770195 | 0.913372168 | 1           |
| ASV_16s_1094 | 6.544647017 | -30          | 3.546830441 | 1.347840528 | NA          | NA          |
| ASV_16s_1095 | 1.131207928 | -24.17382148 | 3.55143929  | 0.348768865 | 0.999833682 | NA          |
| ASV_16s_1096 | 4.461560605 | 3.136760499  | 3.014349318 | 0.46898423  | 0.99955231  | 1           |
| ASV_16s_1097 | 5.736108005 | -1.323475227 | 2.368416374 | 1.400079975 | 0.985568815 | 1           |
| ASV_16s_1098 | 5.407700252 | -10.88311346 | 2.385553568 | 6.275748949 | 0.507945795 | 1           |
| ASV_16s_1099 | 5.471649111 | 0.150597074  | 2.372279973 | 11.1875731  | 0.130643872 | 0.627557169 |
| ASV_16s_1100 | 4.642550707 | -8.797779019 | 3.549233657 | 3.548260177 | 0.830087699 | 1           |
| ASV_16s_1101 | 4.680282591 | 1.669367544  | 3.072086452 | 5.733050481 | 0.57124234  | 1           |
| ASV_16s_1102 | 6.557607611 | 4.440419485  | 3.550809939 | 5.047553912 | 0.654159896 | 1           |
| ASV_16s_1103 | 5.669380985 | -30          | 3.075798894 | 3.774020168 | 0.805406911 | 1           |
| ASV_16s_1104 | 5.974157641 | 3.08807074   | 2.123690383 | 9.245261095 | 0.235523714 | 0.949152858 |
| ASV_16s_1105 | 6.061226327 | 1.976117317  | 2.764246476 | 6.686879827 | 0.462193288 | 1           |
| ASV_16s_1106 | 5.529594324 | -0.11667365  | 1.971249238 | 10.83333543 | 0.146055878 | 0.676918169 |
| ASV_16s_1107 | 6.897293812 | 0.407941341  | 2.521791004 | 12.30198534 | 0.091055131 | 0.492063551 |
| ASV_16s_1108 | 5.39899236  | -1.489348374 | 1.668788827 | 13.28760467 | 0.06540339  | 0.390254648 |
| ASV_16s_1109 | 3.283705151 | 17.43116726  | 3.551441835 | 2.231680171 | NA          | NA          |
| ASV_16s_1110 | 5.69490969  | -29.9951614  | 2.56448068  | 4.836926389 | 0.679856017 | 1           |
| ASV_16s_1111 | 4.503886588 | 10.76004332  | 3.546387103 | 2.816928093 | 0.901405637 | 1           |
| ASV_16s_1112 | 1.45312089  | -23.69576517 | 3.551438897 | 1.796324309 | NA          | NA          |
| ASV_16s_1113 | 1.978345874 | 18.38247994  | 3.551441035 | 1.879600786 | 0.966202487 | NA          |
| ASV_16s_1114 | 4.622392989 | 11.20509865  | 3.546398303 | 2.997032659 | 0.885276599 | 1           |
| ASV_16s_1115 | 3.447418515 | -8.015625696 | 2.802805332 | 2.773209637 | 0.90515984  | 1           |
| ASV_16s_1116 | 1.536730902 | -23.23197169 | 3.54971275  | 1.366204043 | NA          | NA          |
| ASV_16s_1117 | 5.390152602 | -3.219241454 | 2.65295249  | 2.310995344 | 0.940644755 | 1           |
| ASV_16s_1118 | 6.545716189 | 7.561101648  | 2.400877317 | 6.425776477 | 0.491003072 | 1           |
| ASV_16s_1119 | 0.937996401 | -0.170447516 | 3.550534443 | 1.586909725 | 0.979147433 | NA          |
| ASV_16s_1120 | 4.732955037 | 8.297772547  | 2.082277322 | 5.963527349 | 0.5440145   | 1           |
| ASV_16s_1121 | 4.834509209 | -10.8878677  | 3.548602418 | 3.332956386 | 0.852588911 | 1           |
| ASV_16s_1122 | 4.436149756 | -10.51765838 | 3.548674563 | 3.342793046 | 0.85158538  | 1           |
| ASV_16s_1123 | 5.41617599  | -0.925506445 | 2.643502919 | 5.894713439 | 0.552095647 | 1           |
| ASV_16s_1124 | 4.387885128 | 9.58043549   | 3.547568331 | 3.100659312 | 0.875536842 | 1           |
| ASV_16s_1125 | 6.887104106 | 4.713950315  | 1.320905223 | 11.65932429 | 0.112333567 | 0.562399495 |
| ASV_16s_1126 | 5.227365146 | 1.736054051  | 1.781369143 | 6.220015112 | 0.51430725  | 1           |
| ASV_16s_1127 | 4.886309381 | 4.158590275  | 2.38584585  | 8.201704038 | 0.315144466 | 1           |
| ASV_16s_1128 | 1.721493236 | -23.0312413  | 3.551439919 | 2.282637027 | 0.942557098 | NA          |
| ASV_16s_1129 | 5.002699144 | 3.941274082  | 2.041871451 | 10.41901548 | 0.166045347 | 0.739891661 |
| ASV_16s_1130 | 6.157808888 | 1.682869365  | 3.131449223 | 5.408135356 | 0.610286356 | 1           |
| ASV_16s_1131 | 1.863481776 | -11.97510717 | 3.552157344 | 1.933462386 | NA          | NA          |
| ASV_16s_1132 | 4.684155607 | -1.971183082 | 1.840645312 | 5.723333835 | 0.572399831 | 1           |
| ASV_16s_1133 | 7.085437305 | -9.431959589 | 3.552157344 | 2.453154282 | NA          | NA          |
| ASV_16s_1134 | 4.835982099 | 30           | 3.547830358 | 1.943222283 | NA          | NA          |
| ASV_16s_1135 | 6.574175146 | 5.51144254   | 2.032333931 | 4.053134828 | 0.77363738  | 1           |
| ASV_16s_1136 | 4.261402737 | 1.325990669  | 1.743796523 | 5.869323238 | 0.55508816  | 1           |
| ASV_16s_1137 | 4.470261502 | -8.963306366 | 3.549242062 | 3.360845953 | 0.849737268 | 1           |
| ASV_16s_1138 | 4.435205183 | 11.37381229  | 3.509698068 | 2.771834712 | 0.905276854 | 1           |
| ASV_16s_1139 | 0.469266533 | 2.454787886  | 3.548576241 | 0.316609992 | 0.999879971 | NA          |
| ASV_16s_1140 | 5.596513099 | 0.587945705  | 2.733368354 | 4.509774064 | 0.719539994 | 1           |



|              |             |              |             |             |             |             |   |
|--------------|-------------|--------------|-------------|-------------|-------------|-------------|---|
| ASV_16s_1141 | 7.127076268 | 1.189540228  | 3.549015726 | 3.34591423  | NA          | NA          |   |
| ASV_16s_1142 | 4.549279303 | 10.82568976  | 3.546902433 | 3.05958163  | 0.879436255 |             | 1 |
| ASV_16s_1143 | 1.380988119 | 7.472514573  | 3.550174136 | 1.166693062 | NA          | NA          |   |
| ASV_16s_1144 | 5.303662426 | -5.774286859 | 2.93731732  | 3.051983382 | 0.880152041 |             | 1 |
| ASV_16s_1145 | 5.333624076 | -30          | 3.071095742 | 3.702191927 | 0.813368681 |             | 1 |
| ASV_16s_1146 | 6.134237265 | -0.547163571 | 2.376138805 | 8.791383174 | 0.267982985 |             | 1 |
| ASV_16s_1147 | 4.325911938 | -8.773343253 | 3.549263435 | 3.322908872 | 0.853611408 |             | 1 |
| ASV_16s_1148 | 5.384030059 | 0.859711237  | 1.466126467 | 11.22305752 | 0.129180971 | 0.623806443 |   |
| ASV_16s_1149 | 4.534201037 | 9.460832844  | 2.796131547 | 4.199157652 | 0.756573905 |             | 1 |
| ASV_16s_1150 | 4.694690525 | 3.82937437   | 2.22798243  | 8.421430908 | 0.296902216 |             | 1 |
| ASV_16s_1151 | 2.875623283 | -23.10909781 | 3.551450767 | 1.893690068 | 0.965489217 |             | 1 |
| ASV_16s_1152 | 3.063317005 | 15.28594128  | 3.550849539 | 2.505632297 | 0.926672351 |             | 1 |
| ASV_16s_1153 | 4.556440143 | -7.635830741 | 2.567028076 | 4.990234201 | 0.661155061 |             | 1 |
| ASV_16s_1154 | 5.539737845 | 9.31544546   | 3.547670967 | 4.002698176 | NA          | NA          |   |
| ASV_16s_1155 | 2.891944262 | -29.92610756 | 3.55132116  | 1.616534681 | 0.977998916 |             | 1 |
| ASV_16s_1156 | 5.882895265 | -0.675905948 | 2.876047005 | 6.797310919 | 0.450284665 |             | 1 |
| ASV_16s_1157 | 4.823180754 | 2.642038926  | 2.523299523 | 7.375222675 | 0.390884107 |             | 1 |
| ASV_16s_1158 | 5.843730599 | -26.10289679 | 3.551524097 | 1.788447241 | 0.970616686 |             | 1 |
| ASV_16s_1159 | 2.361322095 | -1.992825666 | 3.550903792 | 2.085263033 | 0.954970772 |             | 1 |
| ASV_16s_1160 | 5.460051772 | 7.924455477  | 3.163047677 | 1.16822465  | 0.99164021  |             | 1 |
| ASV_16s_1161 | 4.39198037  | 4.895793123  | 3.443987781 | 2.875858211 | 0.896243892 |             | 1 |
| ASV_16s_1162 | 4.75903059  | 8.701230502  | 2.634128619 | 4.30073615  | 0.744559819 |             | 1 |
| ASV_16s_1163 | 3.664112814 | 9.99392652   | 3.408634774 | 1.510679006 | 0.981937649 |             | 1 |
| ASV_16s_1164 | 5.8684545   | 1.180752194  | 1.433325413 | 18.85110617 | 0.008666784 | 0.073622048 |   |
| ASV_16s_1165 | 5.126488131 | -7.685593584 | 2.340465358 | 5.737923711 | 0.570662088 |             | 1 |
| ASV_16s_1166 | 3.842174422 | 1.368281301  | 2.33537964  | 7.523925403 | 0.376436209 |             | 1 |
| ASV_16s_1167 | 4.137908444 | 17.85217453  | 3.549887513 | 1.933585183 | 0.963424571 |             | 1 |
| ASV_16s_1168 | 4.804485355 | 9.389310459  | 3.203677332 | 2.884996951 | 0.895433173 |             | 1 |
| ASV_16s_1169 | 4.524725735 | 9.074222176  | 2.34997486  | 4.680907113 | 0.698837641 |             | 1 |
| ASV_16s_1170 | 1.347732491 | -7.203115471 | 3.552157344 | 1.734710167 | NA          | NA          |   |
| ASV_16s_1171 | 6.223751923 | 0.08863382   | 2.854288053 | 4.838017278 | 0.679723063 |             | 1 |
| ASV_16s_1172 | 4.030585829 | 8.299331456  | 2.499822662 | 4.635666713 | 0.704325114 |             | 1 |
| ASV_16s_1173 | 4.883834396 | -0.008922889 | 2.443438409 | 8.928357526 | 0.257840711 | 0.998771776 |   |
| ASV_16s_1174 | 1.426330448 | -22.16507969 | 3.550605707 | 1.590103461 | NA          | NA          |   |
| ASV_16s_1175 | 2.586218586 | -14.17969863 | 3.552157344 | 2.134562747 | NA          | NA          |   |
| ASV_16s_1176 | 4.554909266 | 2.018791743  | 2.168349391 | 7.62416792  | 0.366897168 |             | 1 |
| ASV_16s_1177 | 4.674113971 | 3.262500677  | 2.544761952 | 6.271138719 | 0.508470658 |             | 1 |
| ASV_16s_1178 | 4.481838061 | 0.294482345  | 3.549455291 | 2.170385916 | 0.949810879 |             | 1 |
| ASV_16s_1179 | 2.971787688 | -5.692293999 | 3.550705199 | 1.58690103  | 0.979147765 |             | 1 |
| ASV_16s_1180 | 4.618487923 | 12.35444764  | 3.543181176 | 2.542397662 | 0.923870784 |             | 1 |
| ASV_16s_1181 | 4.407895247 | 0.242313986  | 3.549583233 | 1.605011629 | 0.978449938 |             | 1 |
| ASV_16s_1182 | 1.131138657 | -23.4582937  | 3.551439294 | 0.348724742 | 0.999833753 | NA          |   |
| ASV_16s_1183 | 4.439392138 | -10.68730835 | 3.548646912 | 3.171617847 | 0.868685232 |             | 1 |
| ASV_16s_1184 | 5.55563816  | -4.884584072 | 2.416181714 | 5.35366388  | 0.616888319 |             | 1 |
| ASV_16s_1185 | 3.762474569 | 1.435467246  | 2.514188385 | 3.345867123 | 0.851271261 |             | 1 |
| ASV_16s_1186 | 5.109756562 | -0.874101175 | 2.410342456 | 3.031019602 | 0.882117906 |             | 1 |
| ASV_16s_1187 | 4.127478723 | 10.3051878   | 2.706214794 | 3.419541863 | 0.843672605 |             | 1 |
| ASV_16s_1188 | 5.540355818 | 7.060874108  | 3.440750965 | 2.596111294 | 0.919687605 |             | 1 |
| ASV_16s_1189 | 5.306088812 | -0.033796177 | 1.573455781 | 19.19245329 | 0.007605363 | 0.0661597   |   |
| ASV_16s_1190 | 4.647929063 | 0.166621451  | 2.868032048 | 2.955434223 | 0.889094083 |             | 1 |
| ASV_16s_1191 | 3.837403669 | 13.78418079  | 3.551334612 | 1.903482677 | 0.964988583 |             | 1 |
| ASV_16s_1192 | 0.873965641 | -23.00779993 | 3.551439811 | 0.190520935 | NA          | NA          |   |
| ASV_16s_1193 | 4.164910462 | -5.305248132 | 3.54819454  | 3.307555607 | 0.855168844 |             | 1 |
| ASV_16s_1194 | 4.445634716 | -10.77115659 | 3.548635007 | 3.066696806 | 0.87876441  |             | 1 |
| ASV_16s_1195 | 0.75679169  | -23.13964176 | 3.551440174 | 0.102268053 | NA          | NA          |   |
| ASV_16s_1196 | 4.568170803 | 9.160299555  | 3.514936713 | 2.378023676 | 0.935998612 |             | 1 |
| ASV_16s_1197 | 5.111084906 | -0.93497885  | 2.691747216 | 5.130869421 | 0.643996226 |             | 1 |
| ASV_16s_1198 | 3.55911435  | 5.240828346  | 3.546393593 | 2.333849461 | NA          | NA          |   |
| ASV_16s_1199 | 5.106790871 | 1.475535348  | 2.526260207 | 7.881162576 | 0.343189516 |             | 1 |
| ASV_16s_1200 | 2.743559833 | -8.147227351 | 3.552157344 | 2.170806614 | 0.949784643 |             | 1 |
| ASV_16s_1201 | 5.507076499 | 6.12996835   | 3.457283413 | 2.922252299 | 0.892100134 |             | 1 |
| ASV_16s_1202 | 3.323988999 | 17.70831132  | 3.548073777 | 1.383044084 | NA          | NA          |   |
| ASV_16s_1203 | 4.650671751 | -3.972446262 | 1.951340092 | 3.361165845 | 0.849704446 |             | 1 |
| ASV_16s_1204 | 4.456476164 | 3.553625445  | 1.904139174 | 11.34727832 | 0.124171911 | 0.606089103 |   |
| ASV_16s_1205 | 3.951166541 | 1.42393384   | 1.690111654 | 8.007420704 | 0.331940007 |             | 1 |
| ASV_16s_1206 | 4.512376947 | -11.00647623 | 3.548602169 | 2.98119403  | 0.886736468 |             | 1 |
| ASV_16s_1207 | 4.315697597 | 0.084615242  | 1.642370453 | 16.42634597 | 0.021494205 | 0.162617091 |   |

|              |             |              |             |              |             |             |   |
|--------------|-------------|--------------|-------------|--------------|-------------|-------------|---|
| ASV_16s_1208 | 4.33209772  | -15.9273108  | 3.546268769 | 0.56497125   | 0.999172102 |             | 1 |
| ASV_16s_1209 | 1.353107612 | -30          | 3.549945037 | 0.743025474  | 0.997982868 | NA          |   |
| ASV_16s_1210 | 2.884994393 | -20.8359173  | 3.551088751 | 0.972266026  | NA          | NA          |   |
| ASV_16s_1211 | 5.285459798 | 1.32378079   | 2.54211714  | 5.936627631  | 0.547168265 |             | 1 |
| ASV_16s_1212 | 1.310676709 | -12.94327835 | 3.552157344 | 0.450096445  | NA          | NA          |   |
| ASV_16s_1213 | 2.017467885 | -22.40407306 | 3.551442595 | 2.193478672  | 0.948360117 |             | 1 |
| ASV_16s_1214 | 4.643971681 | -7.610135674 | 3.15440121  | 2.883107057  | 0.895601053 |             | 1 |
| ASV_16s_1215 | 3.072600199 | 0.482804747  | 2.710068355 | 8.71308399   | 0.273917038 |             | 1 |
| ASV_16s_1216 | 4.675755975 | 0.470070745  | 1.980242976 | 10.03428759  | 0.186638734 | 0.803223968 |   |
| ASV_16s_1217 | 7.510305074 | 4.017799161  | 2.393219762 | 5.02612438   | 0.656775007 |             | 1 |
| ASV_16s_1218 | 2.94882304  | 17.37754164  | 3.551442286 | 0.90740224   | NA          | NA          |   |
| ASV_16s_1219 | 1.314596497 | -23.71381683 | 3.551439043 | 0.440944816  | NA          | NA          |   |
| ASV_16s_1220 | 5.073817736 | -0.799691991 | 3.244195578 | 4.344606912  | 0.739339297 |             | 1 |
| ASV_16s_1221 | 4.706551195 | 4.433734303  | 1.982300215 | 6.733925944  | 0.457099193 |             | 1 |
| ASV_16s_1222 | 4.722837229 | 6.486726581  | 2.103960648 | 4.373319604  | 0.735913103 |             | 1 |
| ASV_16s_1223 | 4.904602921 | -0.931750711 | 2.651627154 | 5.572067772  | 0.590505967 |             | 1 |
| ASV_16s_1224 | 4.779902632 | -1.207356779 | 2.132544974 | 5.516512277  | 0.597192931 |             | 1 |
| ASV_16s_1225 | 4.615204652 | 6.298077923  | 2.73097503  | 5.62986106   | 0.583569878 |             | 1 |
| ASV_16s_1226 | 4.651049045 | -0.924698502 | 1.476975669 | 10.90763351  | 0.142699057 | 0.670824112 |   |
| ASV_16s_1227 | 4.630564983 | -1.163238464 | 1.846084003 | 7.952056023  | 0.336840557 |             | 1 |
| ASV_16s_1228 | 4.41363814  | 2.118691068  | 1.80201358  | 3.162308852  | 0.869592283 |             | 1 |
| ASV_16s_1229 | 1.309055521 | -23.46443124 | 3.551439043 | 0.43835296   | NA          | NA          |   |
| ASV_16s_1230 | 4.307900419 | -0.402134046 | 1.731377932 | 6.745333261  | 0.45586864  |             | 1 |
| ASV_16s_1231 | 5.764257052 | 1.155994292  | 3.1517146   | 5.647507097  | 0.581456461 |             | 1 |
| ASV_16s_1232 | 5.288845413 | 2.850863249  | 2.070547347 | 12.87255181  | 0.075275203 | 0.428802981 |   |
| ASV_16s_1233 | 4.966173787 | -30          | 3.071683706 | 3.564003066  | 0.828400591 |             | 1 |
| ASV_16s_1234 | 4.536647345 | -25.63516333 | 3.549044772 | 0.43665074   | 0.999646977 |             | 1 |
| ASV_16s_1235 | 5.045835355 | -1.393034889 | 2.375497598 | 8.389919862  | 0.299469323 |             | 1 |
| ASV_16s_1236 | 0.735617207 | -22.6144539  | 3.551440244 | 0.084871541  | NA          | NA          |   |
| ASV_16s_1237 | 3.561905312 | 3.09255865   | 2.817913115 | 4.846311719  | 0.678712085 |             | 1 |
| ASV_16s_1238 | 5.453213741 | -0.8094731   | 2.502278309 | 5.741064089  | 0.570288262 |             | 1 |
| ASV_16s_1239 | 5.107373993 | -0.187929009 | 2.988744801 | 4.687690205  | 0.698014118 |             | 1 |
| ASV_16s_1240 | 3.902852476 | -8.817641135 | 3.549206484 | 3.237317075  | NA          | NA          |   |
| ASV_16s_1241 | 5.436801829 | 1.294838827  | 2.002306513 | 13.52826629  | 0.060236578 | 0.370868823 |   |
| ASV_16s_1242 | 6.121516416 | 15.66660944  | 3.55064495  | 2.911193353  | 0.893094192 |             | 1 |
| ASV_16s_1243 | 5.775523854 | 8.240985346  | 2.94753527  | 3.230453477  | 0.862896558 |             | 1 |
| ASV_16s_1244 | 4.416728275 | -10.76703876 | 3.548568069 | 3.023231077  | 0.882844878 |             | 1 |
| ASV_16s_1245 | 5.701686204 | 3.035387551  | 1.561999832 | 10.02572512  | 0.18712033  | 0.803223968 |   |
| ASV_16s_1246 | 4.192725668 | 7.339601488  | 3.546255652 | 2.418565375  | 0.933103337 |             | 1 |
| ASV_16s_1247 | 6.721019742 | 0.286296478  | 3.210710686 | 5.045572055  | 0.654401738 |             | 1 |
| ASV_16s_1248 | 5.467937256 | 0.397119173  | 2.370604051 | 11.85111947  | 0.105562416 | 0.542604265 |   |
| ASV_16s_1249 | 4.580364189 | 6.244278786  | 3.042291454 | 4.221165821  | 0.753980182 |             | 1 |
| ASV_16s_1250 | 2.630803841 | -8.670911685 | 3.552157344 | 0.877545329  | 0.996569713 |             | 1 |
| ASV_16s_1251 | 4.417195572 | 1.092882421  | 2.058077014 | 11.33110281  | 0.124814389 | 0.607859181 |   |
| ASV_16s_1252 | 4.737518012 | 1.174488068  | 1.928884962 | 12.72029448  | 0.079223802 | 0.443983392 |   |
| ASV_16s_1253 | 1.344659175 | -22.12696583 | 3.55060762  | 0.263708056  | NA          | NA          |   |
| ASV_16s_1254 | 4.611384261 | 1.611232978  | 2.373661939 | 7.926860042  | 0.339087519 |             | 1 |
| ASV_16s_1255 | 4.807933681 | -14.96906057 | 3.335480755 | -0.368637884 | 1           |             | 1 |
| ASV_16s_1256 | 1.894212938 | 18.35658391  | 3.551441189 | 0.594665272  | 0.999020772 | NA          |   |
| ASV_16s_1257 | 3.602529989 | 0.668502191  | 2.094024905 | 7.155603326  | 0.412860462 |             | 1 |
| ASV_16s_1258 | 4.272059761 | 4.033896139  | 2.84857153  | 5.672054546  | 0.578520045 |             | 1 |
| ASV_16s_1259 | 4.622296935 | -0.866026931 | 2.534962889 | 5.736084263  | 0.570881088 |             | 1 |
| ASV_16s_1260 | 2.923369746 | 13.10297259  | 3.551503915 | 1.711550074  | 0.974070675 |             | 1 |
| ASV_16s_1261 | 4.0461733   | 7.601110796  | 2.140554462 | 2.930947539  | 0.891315792 |             | 1 |
| ASV_16s_1262 | 5.327943872 | 17.92190399  | 3.550589526 | 2.723460252  | 0.909352407 |             | 1 |
| ASV_16s_1263 | 3.147953226 | -2.305842674 | 2.771825082 | 3.056057229  | 0.879768483 |             | 1 |
| ASV_16s_1264 | 4.973635198 | 0.517449856  | 2.419025322 | 9.242358407  | 0.235720947 | 0.949152858 |   |
| ASV_16s_1265 | 3.977410939 | -8.63296503  | 3.549218604 | 3.428843791  | 0.842703807 |             | 1 |
| ASV_16s_1266 | 4.368781141 | 10.70692764  | 3.385949784 | 3.293935701  | 0.856545339 |             | 1 |
| ASV_16s_1267 | 5.079707117 | -18.34452606 | 3.048145761 | 0.741065242  | 0.997999931 |             | 1 |
| ASV_16s_1268 | 0.718363925 | -22.93278364 | 3.551440312 | 0.070322625  | NA          | NA          |   |
| ASV_16s_1269 | 4.277343627 | 8.950716739  | 2.413058857 | 3.147241017  | 0.871055266 |             | 1 |
| ASV_16s_1270 | 4.375809089 | -0.331825991 | 2.172834801 | 2.78677329   | 0.904002033 |             | 1 |
| ASV_16s_1271 | 5.303728595 | 0.397313308  | 2.245047111 | 1.430806179  | 0.984608961 |             | 1 |
| ASV_16s_1272 | 5.364265276 | -4.218047728 | 3.065373527 | 2.63671159   | 0.916455675 |             | 1 |
| ASV_16s_1273 | 4.329727977 | -11.08868373 | 3.548682563 | 2.662355311  | 0.914383709 |             | 1 |
| ASV_16s_1274 | 5.137993208 | 18.07171506  | 3.551439903 | 1.242740204  | 0.989909291 |             | 1 |

|              |             |              |             |             |             |             |   |
|--------------|-------------|--------------|-------------|-------------|-------------|-------------|---|
| ASV_16s_1275 | 6.102792989 | -15.69458112 | 3.547037838 | 2.004198259 | NA          | NA          |   |
| ASV_16s_1276 | 4.499598286 | 7.530995966  | 2.418847909 | 5.261604514 | 0.628072074 |             | 1 |
| ASV_16s_1277 | 5.486696924 | 0.934064917  | 1.79870049  | 15.21728403 | 0.033312845 | 0.231008289 |   |
| ASV_16s_1278 | 5.197560815 | -18.07545609 | 3.552157344 | 0.78276043  | 0.997615934 |             | 1 |
| ASV_16s_1279 | 4.839902392 | -0.832984811 | 2.864115597 | 5.508670841 | 0.59813821  |             | 1 |
| ASV_16s_1280 | 4.446189569 | 3.957012504  | 1.727871352 | 11.91338224 | 0.103443564 | 0.533980528 |   |
| ASV_16s_1281 | 5.309035066 | -0.691068597 | 3.549042799 | 4.952355394 | 0.665777629 |             | 1 |
| ASV_16s_1282 | 4.057018813 | 9.080297515  | 3.545983551 | 2.193955491 | 0.948329934 |             | 1 |
| ASV_16s_1283 | 4.564268921 | 4.395186022  | 3.544450851 | 0.749835186 | 0.997922842 |             | 1 |
| ASV_16s_1284 | 1.467495718 | -21.56874253 | 3.551444859 | 1.780904797 | 0.970966383 | NA          |   |
| ASV_16s_1285 | 3.664827684 | -5.496451923 | 3.492134612 | 1.689402401 | 0.975019793 |             | 1 |
| ASV_16s_1286 | 5.427145887 | 0.542322449  | 2.211802274 | 13.04021157 | 0.071134684 | 0.41279216  |   |
| ASV_16s_1287 | 1.044857247 | -23.51996907 | 3.551439436 | 0.300043153 | NA          | NA          |   |
| ASV_16s_1288 | 4.286781214 | -1.815956451 | 1.74027734  | 7.576440803 | 0.371418598 |             | 1 |
| ASV_16s_1289 | 4.943843134 | -0.536842557 | 1.931175071 | 11.98204926 | 0.101150736 | 0.527771404 |   |
| ASV_16s_1290 | 4.11974995  | -2.116815453 | 3.54677478  | 2.60012386  | 0.919370857 |             | 1 |
| ASV_16s_1291 | 5.321188787 | -26.1368967  | 3.55059611  | 3.214292484 | 0.864496102 |             | 1 |
| ASV_16s_1292 | 3.062272025 | -11.58566131 | 3.549205353 | 2.138149459 | NA          | NA          |   |
| ASV_16s_1293 | 5.399380832 | 1.179034726  | 3.061937967 | 5.37795106  | 0.613943135 |             | 1 |
| ASV_16s_1294 | 4.654988709 | -1.19236308  | 2.982946034 | 5.38518849  | 0.613065967 |             | 1 |
| ASV_16s_1295 | 5.015042243 | -1.330217559 | 1.579775761 | 18.31525837 | 0.010625763 | 0.0887068   |   |
| ASV_16s_1296 | 3.985060325 | 10.45462807  | 2.400878426 | 5.657405946 | 0.580271835 |             | 1 |
| ASV_16s_1297 | 2.598214245 | -13.83924539 | 3.550995472 | 0.735370485 | 0.998048961 |             | 1 |
| ASV_16s_1298 | 4.195492631 | 8.148050354  | 2.602920727 | 4.860762561 | 0.676950412 |             | 1 |
| ASV_16s_1299 | 5.526288686 | 8.3216501    | 3.425991647 | 2.311616481 | 0.940602512 |             | 1 |
| ASV_16s_1300 | 4.278608157 | -21.74650801 | 2.622653866 | 1.581970133 | 0.979335427 |             | 1 |
| ASV_16s_1301 | 5.13313156  | 1.662363196  | 1.99787224  | 9.412462137 | 0.224383192 | 0.917621126 |   |
| ASV_16s_1302 | 3.417707002 | 1.550825814  | 3.361806356 | 1.93884576  | 0.963147371 |             | 1 |
| ASV_16s_1303 | 3.595962037 | 3.282009553  | 1.71794116  | 6.84035852  | 0.445688974 |             | 1 |
| ASV_16s_1304 | 1.241178568 | -23.76756897 | 3.551439133 | 0.405674522 | NA          | NA          |   |
| ASV_16s_1305 | 4.408954417 | 6.19261046   | 3.02822131  | 4.335464503 | 0.740428693 |             | 1 |
| ASV_16s_1306 | 5.331018984 | 2.639058966  | 2.489069665 | 8.761003033 | 0.270273579 |             | 1 |
| ASV_16s_1307 | 4.044797792 | -23.83738354 | 3.551439595 | 1.205916056 | 0.990790043 |             | 1 |
| ASV_16s_1308 | 0.807920618 | -23.22487909 | 3.55144     | 0.142334906 | NA          | NA          |   |
| ASV_16s_1309 | 4.446939026 | -1.204461757 | 2.267972997 | 6.582014734 | 0.47365637  |             | 1 |
| ASV_16s_1310 | 5.349520369 | -5.280752809 | 3.411697385 | 3.288010275 | 0.857142682 |             | 1 |
| ASV_16s_1311 | 4.08798256  | 6.450749254  | 2.739286348 | 4.917294941 | 0.670055521 |             | 1 |
| ASV_16s_1312 | 4.595254823 | -7.604816201 | 3.552157344 | 1.059090076 | 0.993818191 |             | 1 |
| ASV_16s_1313 | 3.890352261 | 10.89212077  | 3.546408582 | 2.689852245 | 0.91213595  |             | 1 |
| ASV_16s_1314 | 3.867793646 | -9.919540942 | 2.143689559 | 3.92837318  | 0.78798951  |             | 1 |
| ASV_16s_1315 | 3.468595066 | -3.199789055 | 1.740342394 | 5.995909381 | 0.540227074 |             | 1 |
| ASV_16s_1316 | 3.875644303 | -8.379915107 | 3.549270286 | 3.255393595 | 0.860414195 |             | 1 |
| ASV_16s_1317 | 4.678138627 | -0.799680255 | 3.23879174  | 4.265760194 | 0.748708625 |             | 1 |
| ASV_16s_1318 | 2.762146493 | 18.41075176  | 3.55144035  | 2.229217892 | 0.946072328 |             | 1 |
| ASV_16s_1319 | 4.850432071 | 0.663974202  | 1.846780868 | 15.96068594 | 0.025477977 | 0.187440675 |   |
| ASV_16s_1320 | 4.362927732 | 0.638050289  | 2.612511406 | 6.941323892 | 0.435014697 |             | 1 |
| ASV_16s_1321 | 3.752024203 | 10.16384435  | 3.546638444 | 2.639222645 | 0.916253829 |             | 1 |
| ASV_16s_1322 | 3.700607279 | 11.2274698   | 3.545845796 | 2.460455925 | NA          | NA          |   |
| ASV_16s_1323 | 4.846859969 | 0.378626227  | 3.438488022 | 1.544201211 | 0.980739841 |             | 1 |
| ASV_16s_1324 | 4.666646047 | -0.709276674 | 2.273938667 | 6.960058758 | 0.433050361 |             | 1 |
| ASV_16s_1325 | 5.283144264 | 0.560088625  | 2.560322525 | 11.1564208  | 0.131940061 | 0.630033311 |   |
| ASV_16s_1326 | 5.825335384 | 0.832505252  | 2.693818842 | 7.26576283  | 0.401743235 |             | 1 |
| ASV_16s_1327 | 3.94953102  | 5.363112149  | 2.811129187 | 4.243906164 | 0.751294636 |             | 1 |
| ASV_16s_1328 | 3.550122396 | -0.773077612 | 2.692537699 | 5.078867989 | 0.65033905  |             | 1 |
| ASV_16s_1329 | 4.902095987 | 0.432985147  | 2.627753663 | 5.095322278 | 0.648331699 |             | 1 |
| ASV_16s_1330 | 1.010221095 | -23.33051732 | 3.551439503 | 0.279361167 | NA          | NA          |   |
| ASV_16s_1331 | 4.538899564 | -0.243889879 | 1.609471537 | 15.54646038 | 0.029598845 | 0.210761189 |   |
| ASV_16s_1332 | 5.451861983 | 0.567103406  | 2.161134428 | 10.87551694 | 0.144141837 | 0.673682217 |   |
| ASV_16s_1333 | 5.598282418 | 0.453387403  | 2.433581958 | 12.08581903 | 0.097771749 | 0.519090802 |   |
| ASV_16s_1334 | 4.637092401 | -0.797775607 | 3.547526202 | 3.541104941 | 0.830852711 |             | 1 |
| ASV_16s_1335 | 4.081273836 | 9.51647867   | 2.566709181 | 3.842131647 | 0.797770708 |             | 1 |
| ASV_16s_1336 | 4.621020659 | 6.95973726   | 3.465980811 | 2.110963575 | NA          | NA          |   |
| ASV_16s_1337 | 4.82777791  | 0.402493064  | 3.03615238  | 7.64592793  | 0.364848    |             | 1 |
| ASV_16s_1338 | 3.921201883 | -10.80373934 | 3.548735762 | 2.593928381 | 0.919859675 |             | 1 |
| ASV_16s_1339 | 4.222128791 | 0.223627051  | 2.575327711 | 4.218267601 | 0.75432205  |             | 1 |
| ASV_16s_1340 | 4.772597171 | 1.322947554  | 3.548622215 | 2.599467973 | 0.919422672 |             | 1 |
| ASV_16s_1341 | 3.736185728 | 9.771522101  | 3.547299778 | 2.957425331 | 0.888912593 |             | 1 |

|              |             |              |             |             |             |             |   |
|--------------|-------------|--------------|-------------|-------------|-------------|-------------|---|
| ASV_16s_1342 | 4.696890479 | 0.614447006  | 2.952512356 | 3.998286152 | 0.77997479  |             | 1 |
| ASV_16s_1343 | 3.247195743 | -29.46325202 | 3.549076035 | 1.60528985  | NA          | NA          |   |
| ASV_16s_1344 | 2.436068259 | -29.78115867 | 3.551260737 | 0.512808404 | 0.999398218 |             | 1 |
| ASV_16s_1345 | 3.790670633 | 6.654436748  | 3.548472725 | 2.367846495 | 0.93671539  |             | 1 |
| ASV_16s_1346 | 5.223379847 | 3.243233036  | 3.548640658 | 4.082220767 | 0.770259991 |             | 1 |
| ASV_16s_1347 | 4.473295888 | -0.832313649 | 2.944388639 | 4.24976842  | 0.750601435 |             | 1 |
| ASV_16s_1348 | 4.872007178 | 1.656292598  | 3.546102857 | 3.286904222 | 0.857254081 |             | 1 |
| ASV_16s_1349 | 5.131220765 | -8.938989817 | 3.550065113 | 4.259050199 | 0.749503151 |             | 1 |
| ASV_16s_1350 | 5.097120287 | -9.169140297 | 2.594514381 | 3.619388941 | 0.822422293 |             | 1 |
| ASV_16s_1351 | 1.187097151 | -29.94811685 | 3.550509642 | 1.238975184 | NA          | NA          |   |
| ASV_16s_1352 | 2.494174046 | 0.747791707  | 2.431965435 | 4.4423302   | 0.727650104 |             | 1 |
| ASV_16s_1353 | 3.947787497 | 5.035941882  | 3.546836707 | 2.323891887 | 0.939764541 |             | 1 |
| ASV_16s_1354 | 3.778801908 | 5.770752915  | 3.356270731 | 3.142066681 | 0.871556168 |             | 1 |
| ASV_16s_1355 | 3.992941382 | -10.21613561 | 3.547828271 | 1.707977944 | 0.974225135 |             | 1 |
| ASV_16s_1356 | 4.887905784 | 5.037872988  | 2.126760219 | 1.54960859  | 0.980542345 |             | 1 |
| ASV_16s_1357 | 4.010354804 | 3.155259287  | 2.04497024  | 9.507060931 | 0.218270278 | 0.898694462 |   |
| ASV_16s_1358 | 4.543073762 | 5.834452028  | 3.520318863 | 2.289158409 | 0.942120155 |             | 1 |
| ASV_16s_1359 | 4.063273181 | 0.640493213  | 1.621619178 | 13.64360774 | 0.057895584 | 0.358478795 |   |
| ASV_16s_1360 | 4.814866673 | -0.11770338  | 2.043279276 | 5.912507459 | 0.550001853 |             | 1 |
| ASV_16s_1361 | 4.500361411 | -0.799578236 | 3.227623466 | 4.295955364 | 0.745127622 |             | 1 |
| ASV_16s_1362 | 4.309718719 | -0.389060194 | 2.111366111 | 9.121361747 | 0.244059854 | 0.961181421 |   |
| ASV_16s_1363 | 4.85671536  | 0.595505188  | 1.499000075 | 10.26598807 | 0.17399457  | 0.766343316 |   |
| ASV_16s_1364 | 4.429585935 | -0.818682915 | 2.860534141 | 5.417759297 | 0.609121292 |             | 1 |
| ASV_16s_1365 | 2.897863877 | 0.696192853  | 2.903865976 | 3.530771345 | 0.831955551 |             | 1 |
| ASV_16s_1366 | 3.267884514 | -1.789479867 | 2.96670415  | 2.77982613  | 0.904595832 |             | 1 |
| ASV_16s_1367 | 4.043127482 | -10.91012046 | 3.548641543 | 2.764014775 | 0.905941148 |             | 1 |
| ASV_16s_1368 | 4.63031326  | 6.363988444  | 2.772172036 | 4.819592419 | 0.681968288 |             | 1 |
| ASV_16s_1369 | 4.406218934 | -30          | 3.54883869  | 2.289369806 | 0.942105963 |             | 1 |
| ASV_16s_1370 | 5.095515807 | 0.637785344  | 2.69636385  | 4.796693493 | 0.684757627 |             | 1 |
| ASV_16s_1371 | 3.606082034 | 10.42590648  | 3.061036221 | 3.369748195 | 0.84882292  |             | 1 |
| ASV_16s_1372 | 4.864657131 | -1.001289169 | 2.3607189   | 3.960167251 | 0.784353781 |             | 1 |
| ASV_16s_1373 | 3.759603842 | 4.172048998  | 2.67401496  | 5.603906184 | 0.586682201 |             | 1 |
| ASV_16s_1374 | 3.553190959 | -13.22293918 | 3.545803706 | 1.207891392 | NA          | NA          |   |
| ASV_16s_1375 | 2.854495282 | 12.08670713  | 3.55145155  | 1.829667985 | NA          | NA          |   |
| ASV_16s_1376 | 1.188224384 | -0.626388604 | 3.344704029 | 2.319462833 | 0.940067573 | NA          |   |
| ASV_16s_1377 | 5.200166487 | -0.310148833 | 3.523685428 | 3.983119864 | 0.781719611 |             | 1 |
| ASV_16s_1378 | 7.32214615  | -30          | 3.548354094 | 2.559515866 | NA          | NA          |   |
| ASV_16s_1379 | 3.726978912 | -10.05923119 | 3.548901196 | 3.082948819 | 0.877224178 |             | 1 |
| ASV_16s_1380 | 4.786510704 | 5.735554562  | 1.970981147 | 1.011697343 | 0.994637629 |             | 1 |
| ASV_16s_1381 | 4.990576421 | 0.778428098  | 3.551112958 | 0.958304829 | NA          | NA          |   |
| ASV_16s_1382 | 1.225069097 | -22.455864   | 3.550610888 | 0.212360949 | NA          | NA          |   |
| ASV_16s_1383 | 1.854554527 | -1.024432496 | 3.545697123 | 2.535840352 | 0.924374157 | NA          |   |
| ASV_16s_1384 | 5.697450196 | 2.110099036  | 2.884162562 | 4.94003674  | 0.667280796 |             | 1 |
| ASV_16s_1385 | 4.30869925  | -1.758740041 | 2.06549823  | 11.38718348 | 0.122599292 | 0.602054536 |   |
| ASV_16s_1386 | 4.225212036 | -1.263067308 | 2.29481468  | 6.490752429 | 0.483750983 |             | 1 |
| ASV_16s_1387 | 3.680489615 | 1.938614391  | 1.816175827 | 7.416566637 | 0.386831738 |             | 1 |
| ASV_16s_1388 | 3.573806807 | 0.757216126  | 2.453317938 | 6.028610543 | 0.536412645 |             | 1 |
| ASV_16s_1389 | 3.86907836  | 10.76836116  | 2.413271355 | 5.282807244 | 0.6254937   |             | 1 |
| ASV_16s_1390 | 6.126420968 | 1.170528377  | 3.549032116 | 5.087337646 | NA          | NA          |   |
| ASV_16s_1391 | 3.719387186 | -8.55769254  | 3.549227125 | 3.306157189 | 0.855310397 |             | 1 |
| ASV_16s_1392 | 5.653764347 | 7.871813527  | 3.5500381   | 2.880988266 | 0.895789129 |             | 1 |
| ASV_16s_1393 | 4.578839864 | 0.199689972  | 2.270250311 | 6.69338758  | 0.461486819 |             | 1 |
| ASV_16s_1394 | 1.375749592 | -22.97347496 | 3.551440032 | 1.993551603 | NA          | NA          |   |
| ASV_16s_1395 | 3.659057266 | -8.634972822 | 3.549271261 | 3.073683604 | 0.87810322  |             | 1 |
| ASV_16s_1396 | 4.833405344 | 0.039600978  | 2.52572132  | 7.785317812 | 0.351904628 |             | 1 |
| ASV_16s_1397 | 4.837378718 | -10.49961645 | 3.550028068 | 4.712986867 | 0.694941292 |             | 1 |
| ASV_16s_1398 | 5.637990279 | -10.4802239  | 3.023929125 | 3.2125572   | 0.864667428 |             | 1 |
| ASV_16s_1399 | 4.946156701 | 5.440266727  | 2.961026288 | 0.937312114 | 0.9957774   |             | 1 |
| ASV_16s_1400 | 0.712260172 | -0.170410889 | 3.550543468 | 1.446770879 | 0.984095456 | NA          |   |
| ASV_16s_1401 | 3.636346088 | 8.198516466  | 3.545982073 | 2.01813019  | 0.958830086 |             | 1 |
| ASV_16s_1402 | 3.992290982 | -29.90087814 | 2.27516566  | 4.441750262 | 0.727719699 |             | 1 |
| ASV_16s_1403 | 2.542728314 | -18.5838525  | 3.55153106  | 0.841646136 | 0.996995348 |             | 1 |
| ASV_16s_1404 | 2.338696099 | -12.17083732 | 3.552157344 | 0.805311922 | 0.997389365 |             | 1 |
| ASV_16s_1405 | 5.09183762  | 0.22049179   | 3.541690472 | 2.419824926 | 0.933012369 |             | 1 |
| ASV_16s_1406 | 3.872920482 | 9.450739556  | 3.54473058  | 1.803084573 | 0.969931261 |             | 1 |
| ASV_16s_1407 | 4.055816338 | 0.046967418  | 2.231344029 | 4.119540239 | 0.765910396 |             | 1 |
| ASV_16s_1408 | 3.661462311 | -8.397445674 | 3.549202425 | 3.438855792 | 0.841658746 |             | 1 |

|              |             |              |             |              |             |             |
|--------------|-------------|--------------|-------------|--------------|-------------|-------------|
| ASV_16s_1409 | 3.701138233 | 2.509997781  | 3.542883579 | 3.309462755  | 0.854975714 | 1           |
| ASV_16s_1410 | 3.201645217 | 0.813824287  | 1.836443577 | 7.131913834  | 0.41527561  | 1           |
| ASV_16s_1411 | 4.103524918 | 1.30007028   | 2.688198737 | 3.675703669  | 0.816279946 | 1           |
| ASV_16s_1412 | 3.481860057 | -2.687050078 | 2.65816865  | 3.382193696  | 0.847541343 | 1           |
| ASV_16s_1413 | 3.870947701 | -0.300146083 | 2.501714912 | 7.816258786  | 0.349074675 | 1           |
| ASV_16s_1414 | 5.003319724 | 1.258648312  | 3.548849346 | 2.308370777  | 0.940823081 | 1           |
| ASV_16s_1415 | 4.719071366 | 0.463680031  | 2.889470604 | 3.398736661  | 0.84583192  | 1           |
| ASV_16s_1416 | 2.315609451 | -7.903122567 | 3.552157344 | 0.799222532  | 0.99745188  | 1           |
| ASV_16s_1417 | 4.691850828 | 1.170831233  | 3.23924863  | 2.286736803  | 0.942282604 | 1           |
| ASV_16s_1418 | 5.085600391 | 11.24800097  | 3.550124546 | 4.240824734  | 0.751658863 | 1           |
| ASV_16s_1419 | 4.214914293 | 0.16412411   | 2.791245178 | 5.147188364  | 0.642006528 | 1           |
| ASV_16s_1420 | 4.723015367 | 1.421621799  | 3.30491829  | 3.9297566    | 0.787831637 | 1           |
| ASV_16s_1421 | 5.70347487  | -6.055176545 | 3.550380368 | 0.531430623  | NA          | NA          |
| ASV_16s_1422 | 4.467176189 | -1.801678047 | 2.654187003 | 4.348312796  | 0.738897495 | 1           |
| ASV_16s_1423 | 4.570368187 | -1.203696606 | 2.481459167 | 3.298953624  | 0.856038765 | 1           |
| ASV_16s_1424 | 4.675762421 | -0.670242073 | 2.76304844  | 4.173217995  | 0.759623969 | 1           |
| ASV_16s_1425 | 3.279462952 | -6.676863917 | 3.546707696 | 2.445649026  | NA          | NA          |
| ASV_16s_1426 | 1.464293859 | -14.7709842  | 3.552157344 | 0.518062132  | NA          | NA          |
| ASV_16s_1427 | 3.992689793 | 2.176998413  | 2.87497814  | 4.220805681  | 0.754022669 | 1           |
| ASV_16s_1428 | 1.173292356 | -12.53040087 | 3.552157344 | -0.177014967 | NA          | NA          |
| ASV_16s_1429 | 3.041946398 | 0.626556391  | 2.188533196 | 9.109073272  | 0.24491964  | 0.961181421 |
| ASV_16s_1430 | 1.896762953 | -20.94312789 | 3.551449084 | 1.733452882  | 0.973111977 | NA          |
| ASV_16s_1431 | 2.307060675 | -12.13459899 | 3.552157344 | 0.796953362  | 0.997474921 | 1           |
| ASV_16s_1432 | 3.762512774 | 0.722259941  | 2.497931354 | 6.933270684  | NA          | NA          |
| ASV_16s_1433 | 0.803766532 | 8.077838946  | 3.550189668 | 0.168156681  | NA          | NA          |
| ASV_16s_1434 | 3.488306025 | 8.254092416  | 3.548145422 | 2.225987565  | 0.94628123  | 1           |
| ASV_16s_1435 | 2.51989934  | -1.023795771 | 3.506708076 | 1.470139315  | 0.983325467 | 1           |
| ASV_16s_1436 | 4.24065004  | -0.824086939 | 2.911515412 | 4.531122671  | 0.71696641  | 1           |
| ASV_16s_1437 | 2.460708256 | 11.13122368  | 3.551539345 | 1.646328646  | 0.976807371 | 1           |
| ASV_16s_1438 | 4.372817382 | -5.58142894  | 2.232076642 | 5.112356444  | 0.646253931 | 1           |
| ASV_16s_1439 | 3.455572033 | -10.16574205 | 3.548867236 | 2.851021436  | 0.898433389 | 1           |
| ASV_16s_1440 | 4.458346544 | 7.85616209   | 3.218077436 | -0.215349749 | 1           | 1           |
| ASV_16s_1441 | 3.860220926 | 0.010144565  | 2.186693418 | 9.919471628  | 0.193183059 | 0.820519624 |
| ASV_16s_1442 | 3.351228242 | -8.413225832 | 3.549404506 | 2.721545754  | 0.909512035 | 1           |
| ASV_16s_1443 | 4.22876925  | -2.919924306 | 2.00501874  | 5.005906804  | 0.659242355 | 1           |
| ASV_16s_1444 | 0.980337225 | -21.8313463  | 3.550647271 | 0.116799055  | NA          | NA          |
| ASV_16s_1445 | 4.341878576 | 0.511058164  | 2.217170178 | 12.25151753  | 0.092585099 | 0.499217205 |
| ASV_16s_1446 | 1.155065148 | -21.74464097 | 3.550613105 | 0.17992776   | NA          | NA          |
| ASV_16s_1447 | 4.271286221 | -0.943889344 | 2.563845228 | 5.046713704  | 0.654262425 | 1           |
| ASV_16s_1448 | 4.532623605 | 1.838355274  | 3.549415339 | 2.206499013  | 0.947532612 | 1           |
| ASV_16s_1449 | 6.326880204 | 1.47573765   | 3.55073055  | 4.010418869  | 0.778576577 | 1           |
| ASV_16s_1450 | 3.667190759 | -10.82198654 | 3.54860458  | 2.765656519  | 0.905801858 | 1           |
| ASV_16s_1451 | 4.127034759 | -0.457988413 | 2.060160501 | 5.795492569  | 0.563821438 | 1           |
| ASV_16s_1452 | 4.657922073 | -10.87301566 | 3.548946665 | 3.909895172  | 0.790095321 | 1           |
| ASV_16s_1453 | 1.079240177 | -19.71809929 | 3.551467753 | 0.902499738  | NA          | NA          |
| ASV_16s_1454 | 3.149106087 | 1.126966023  | 2.094470568 | 8.210625004  | 0.314388269 | 1           |
| ASV_16s_1455 | 1.149231486 | -22.29612424 | 3.550613279 | 0.177137099  | NA          | NA          |
| ASV_16s_1456 | 3.534716261 | -0.006787987 | 1.964438156 | 11.92976004  | 0.102892538 | 0.532675821 |
| ASV_16s_1457 | 3.408768536 | -7.6236063   | 3.54759164  | 2.730036339  | 0.908803128 | 1           |
| ASV_16s_1458 | 4.709552832 | -0.544966322 | 3.549576078 | 3.44479894   | 0.84103727  | 1           |
| ASV_16s_1459 | 4.825401207 | -9.374504998 | 3.550033947 | 4.5528329    | 0.714346317 | 1           |
| ASV_16s_1460 | 4.866396824 | 13.34823794  | 3.547233784 | 0.330963288  | NA          | NA          |
| ASV_16s_1461 | 3.858932346 | -0.725049765 | 2.151189698 | 5.010362661  | 0.658698557 | 1           |
| ASV_16s_1462 | 4.647011409 | -9.237214009 | 3.550040467 | 4.353372348  | 0.738294115 | 1           |
| ASV_16s_1463 | 3.190969863 | 3.550662901  | 2.642572723 | 4.352242232  | 0.738428907 | 1           |
| ASV_16s_1464 | 6.257498109 | 21.02132318  | 3.549842324 | 1.875058082  | NA          | NA          |
| ASV_16s_1465 | 2.387007084 | -22.75188091 | 3.552157344 | 0.131248915  | 0.999994085 | 1           |
| ASV_16s_1466 | 0.900539948 | -23.2737596  | 3.551439745 | 0.208860835  | NA          | NA          |
| ASV_16s_1467 | 3.545452439 | -1.184251609 | 3.168599379 | 2.374750459  | 0.936229585 | 1           |
| ASV_16s_1468 | 1.079255011 | 0.008336939  | 3.550550898 | 3.992549232  | 0.780635193 | NA          |
| ASV_16s_1469 | 3.501267318 | 3.716529666  | 2.71210998  | 5.194358907  | 0.636258015 | 1           |
| ASV_16s_1470 | 2.024001987 | 0.334423523  | 3.548507194 | 3.890742454  | 0.792272304 | 1           |
| ASV_16s_1471 | 3.441724273 | 7.165511782  | 3.546705612 | 1.938976381  | NA          | NA          |
| ASV_16s_1472 | 4.211941402 | -27.21679088 | 3.551507455 | 1.432430092  | 0.984557191 | 1           |
| ASV_16s_1473 | 5.345848071 | 14.89002249  | 3.550699165 | 2.553637525  | 0.92300424  | 1           |
| ASV_16s_1474 | 4.1859548   | 1.090148046  | 3.547402411 | 3.028641834  | 0.882340039 | 1           |
| ASV_16s_1475 | 4.199357528 | 2.532593815  | 2.37366286  | 3.832066445  | 0.798904238 | 1           |

|              |             |              |             |              |             |             |   |
|--------------|-------------|--------------|-------------|--------------|-------------|-------------|---|
| ASV_16s_1476 | 2.044117553 | -13.18356776 | 3.552157344 | 0.722700412  | NA          | NA          |   |
| ASV_16s_1477 | 3.900838973 | -0.298076301 | 1.654439297 | 20.89936623  | 0.003921983 | 0.039728538 |   |
| ASV_16s_1478 | 5.236553016 | -10.14776198 | 3.547776278 | 2.416801247  | NA          | NA          |   |
| ASV_16s_1479 | 4.293119049 | -0.940598697 | 2.587198457 | 5.681058573  | 0.577444027 |             | 1 |
| ASV_16s_1480 | 4.79518725  | 2.533650061  | 2.868637658 | 2.569237827  | 0.921793777 |             | 1 |
| ASV_16s_1481 | 0.980076508 | -23.19816103 | 3.551439564 | 0.26076293   | 0.999937815 | NA          |   |
| ASV_16s_1482 | 3.307000712 | -8.408131375 | 3.549240959 | 3.111595395  | 0.874490337 |             | 1 |
| ASV_16s_1483 | 5.161194837 | -2.062776618 | 3.552157344 | 0.488648555  | NA          | NA          |   |
| ASV_16s_1484 | 3.526177574 | -29.09668944 | 3.549162639 | 0.426460072  | NA          | NA          |   |
| ASV_16s_1485 | 0.601512151 | -22.71239573 | 3.551440855 | -0.038473204 | NA          | NA          |   |
| ASV_16s_1486 | 1.0624821   | -23.49946851 | 3.551439405 | 0.310282014  | NA          | NA          |   |
| ASV_16s_1487 | 3.547689452 | -0.87198405  | 3.330984185 | 4.4179121    | 0.730578162 |             | 1 |
| ASV_16s_1488 | 4.766591915 | 2.201902805  | 2.745010612 | 6.140084313  | 0.523491118 |             | 1 |
| ASV_16s_1489 | 2.184782219 | -7.938192065 | 3.552157344 | 0.763531616  | 0.997798559 |             | 1 |
| ASV_16s_1490 | 3.327461804 | 8.987745286  | 3.545683711 | 1.720470453  | 0.973682636 |             | 1 |
| ASV_16s_1491 | 3.81393269  | -1.383854809 | 1.965320205 | 4.789075624  | 0.685685275 |             | 1 |
| ASV_16s_1492 | 3.736550903 | 0.911143865  | 2.983608423 | 1.056918051  | NA          | NA          |   |
| ASV_16s_1493 | 3.688423964 | 2.699127947  | 3.54758755  | 1.585091831  | 0.979216736 |             | 1 |
| ASV_16s_1494 | 4.812223967 | 0.758056816  | 2.624638189 | 7.058020483  | 0.422863916 |             | 1 |
| ASV_16s_1495 | 0.993129093 | -23.30258556 | 3.551439537 | 0.268876608  | NA          | NA          |   |
| ASV_16s_1496 | 4.161708138 | -30          | 3.549883935 | 2.46849877   | NA          | NA          |   |
| ASV_16s_1497 | 2.19845647  | -14.03181514 | 3.552157344 | 0.767360791  | 0.997762955 |             | 1 |
| ASV_16s_1498 | 1.112481114 | 0.215538438  | 3.550591857 | 3.513165517  | 0.833829045 | NA          |   |
| ASV_16s_1499 | 3.85031462  | -0.666310913 | 2.269213564 | 7.610870032  | 0.368153233 |             | 1 |
| ASV_16s_1500 | 3.750913076 | -0.283693039 | 2.639228164 | 7.258883135  | 0.40243202  |             | 1 |
| ASV_16s_1501 | 3.037856766 | 17.56135324  | 3.549904188 | 0.416498215  | 0.999698454 |             | 1 |
| ASV_16s_1502 | 3.55566744  | 3.209054572  | 2.293193752 | 8.446360077  | 0.294882919 |             | 1 |
| ASV_16s_1503 | 2.635620627 | 0.151878026  | 3.545109    | 0.873497444  | NA          | NA          |   |
| ASV_16s_1504 | 4.600615557 | -8.606630146 | 3.550074843 | 3.97896924   | 0.782196538 |             | 1 |
| ASV_16s_1505 | 3.35521519  | -8.263157635 | 3.549298184 | 2.997398394  | 0.885242797 |             | 1 |
| ASV_16s_1506 | 3.422559485 | 8.921119493  | 2.467063561 | 3.858331495  | 0.795942696 |             | 1 |
| ASV_16s_1507 | 3.335889319 | -1.582746348 | 3.544737102 | 2.981715322  | 0.886688544 |             | 1 |
| ASV_16s_1508 | 4.211474897 | 0.362837544  | 1.696668874 | 19.42272304  | 0.006961325 | 0.062189545 |   |
| ASV_16s_1509 | 1.105479018 | -22.27457423 | 3.55061489  | 0.155743654  | NA          | NA          |   |
| ASV_16s_1510 | 0.986621039 | -23.27358413 | 3.551439551 | 0.264843155  | NA          | NA          |   |
| ASV_16s_1511 | 4.162407237 | -0.145497881 | 2.146347486 | 9.726119774  | 0.204632524 | 0.854755659 |   |
| ASV_16s_1512 | 4.599729853 | 4.005555203  | 2.765507645 | 2.767208591  | 0.90567009  |             | 1 |
| ASV_16s_1513 | 4.392774268 | -23.70691226 | 3.550598678 | 3.002676233  | NA          | NA          |   |
| ASV_16s_1514 | 5.118579568 | 0.916396992  | 1.860921876 | 12.36177426  | 0.089271998 | 0.483506725 |   |
| ASV_16s_1515 | 1.427709893 | 18.1739564   | 3.551442323 | 0.421239953  | NA          | NA          |   |
| ASV_16s_1516 | 3.328130509 | 10.22381922  | 3.049213469 | 3.217220239  | 0.864206855 |             | 1 |
| ASV_16s_1517 | 3.539962035 | 10.98861274  | 3.546438714 | 2.557343931  | 0.922717466 |             | 1 |
| ASV_16s_1518 | 4.86599273  | 0.192333068  | 3.191344427 | 3.521949566  | 0.83289517  |             | 1 |
| ASV_16s_1519 | 3.192486849 | 2.098264332  | 3.480633365 | 1.559634965  | 0.980172991 |             | 1 |
| ASV_16s_1520 | 3.906383213 | 4.266299017  | 2.329623361 | 2.7801894    | 0.904564823 |             | 1 |
| ASV_16s_1521 | 0.747994569 | -22.92706321 | 3.551440192 | 0.095065155  | 0.99999806  | NA          |   |
| ASV_16s_1522 | 2.929041532 | 1.059909136  | 2.774390091 | 2.979219335  | 0.886917932 |             | 1 |
| ASV_16s_1523 | 3.218632455 | 10.54097499  | 3.546425391 | 2.425025593  | NA          | NA          |   |
| ASV_16s_1524 | 3.528366307 | 10.37462928  | 3.546604124 | 2.541204515  | 0.923962495 |             | 1 |
| ASV_16s_1525 | 3.584333669 | 7.528665123  | 2.802011895 | 3.039772286  | 0.881298743 |             | 1 |
| ASV_16s_1526 | 3.882158396 | -0.847889866 | 2.828422684 | 5.473430836  | 0.602390521 |             | 1 |
| ASV_16s_1527 | 3.733435227 | -1.021359561 | 2.30807273  | 6.660397578  | 0.465074118 |             | 1 |
| ASV_16s_1528 | 2.382731617 | 18.50580716  | 3.551440466 | 0.735402169  | NA          | NA          |   |
| ASV_16s_1529 | 3.287109419 | -2.911482464 | 2.147933731 | 5.454964885  | 0.604621372 |             | 1 |
| ASV_16s_1530 | 4.215961447 | -0.274383002 | 2.476811985 | 8.873234163  | 0.26188595  |             | 1 |
| ASV_16s_1531 | 3.252230077 | -0.114695471 | 2.695627859 | 4.008171877  | 0.778835686 |             | 1 |
| ASV_16s_1532 | 3.320879323 | -8.502806379 | 3.549235779 | 3.070086794  | 0.878443783 |             | 1 |
| ASV_16s_1533 | 3.706652085 | -4.649861733 | 2.712400173 | 2.379689228  | 0.935880923 |             | 1 |
| ASV_16s_1534 | 5.774641211 | -0.563821326 | 3.099490599 | 3.788309556  | 0.80381167  |             | 1 |
| ASV_16s_1535 | 3.058189299 | 0.890451178  | 2.311684861 | 3.042400441  | 0.881052321 |             | 1 |
| ASV_16s_1536 | 3.928961979 | -0.365181793 | 1.97423383  | 7.579722541  | 0.371106521 |             | 1 |
| ASV_16s_1537 | 3.728101776 | -6.106174132 | 2.642172738 | 4.335119013  | 0.740469846 |             | 1 |
| ASV_16s_1538 | 3.958766467 | -30          | 3.549888417 | 2.432849911  | 0.932068088 |             | 1 |
| ASV_16s_1539 | 3.814956807 | -0.988931453 | 2.370812487 | 4.532118563  | 0.716846285 |             | 1 |
| ASV_16s_1540 | 4.310546163 | 0.480316016  | 2.777132862 | 4.317484932  | 0.742568875 |             | 1 |
| ASV_16s_1541 | 3.183674579 | 1.385833323  | 2.41661139  | 7.774018659  | 0.352941998 |             | 1 |
| ASV_16s_1542 | 3.527525473 | 3.74484267   | 1.955334918 | 6.187263257  | 0.518061877 |             | 1 |

|              |             |              |             |              |             |             |   |
|--------------|-------------|--------------|-------------|--------------|-------------|-------------|---|
| ASV_16s_1543 | 3.167808745 | -3.267924004 | 3.086951236 | 3.181936837  | 0.867676922 |             | 1 |
| ASV_16s_1544 | 5.894878214 | -9.33417602  | 3.547533396 | 3.328707587  | NA          | NA          |   |
| ASV_16s_1545 | 3.527490501 | -13.85513277 | 3.547032343 | 0.185529978  | 0.99998055  |             | 1 |
| ASV_16s_1546 | 0.969700098 | -23.75653671 | 3.551439611 | 0.254224602  | NA          | NA          |   |
| ASV_16s_1547 | 0.584258869 | -22.60157136 | 3.551440954 | -0.056302768 | NA          | NA          |   |
| ASV_16s_1548 | 2.920911569 | -2.64493161  | 3.549219565 | 1.309616328  | 0.98818028  |             | 1 |
| ASV_16s_1549 | 3.779939319 | -1.058253846 | 2.074466644 | 5.709920968  | 0.5739988   |             | 1 |
| ASV_16s_1550 | 3.717338639 | -3.172481447 | 1.746344189 | 4.079456124  | 0.770581496 |             | 1 |
| ASV_16s_1551 | 2.329785081 | -19.52053325 | 3.552157344 | 0.156226658  | 0.999989222 |             | 1 |
| ASV_16s_1552 | 3.359224576 | 4.45579866   | 3.547345102 | 2.839216227  | 0.899466943 |             | 1 |
| ASV_16s_1553 | 3.453615249 | -1.366589192 | 2.644212749 | 1.38408784   | 0.98605366  |             | 1 |
| ASV_16s_1554 | 4.345255744 | 0.336522151  | 2.39082714  | 9.893070759  | 0.194714476 | 0.824132425 |   |
| ASV_16s_1555 | 2.030918863 | 8.215891054  | 3.547625945 | 0.721300443  | 0.998166667 |             | 1 |
| ASV_16s_1556 | 5.107902    | -9.830408116 | 3.552157344 | 0.957906968  | NA          | NA          |   |
| ASV_16s_1557 | 3.914940386 | 0.564176698  | 2.139724418 | 9.145878643  | 0.242351604 | 0.961181421 |   |
| ASV_16s_1558 | 3.466056137 | 0.113473127  | 3.549450996 | 1.566367446  | 0.979922674 |             | 1 |
| ASV_16s_1559 | 4.161451635 | 1.942119157  | 3.549479266 | 1.942672378  | 0.962945008 |             | 1 |
| ASV_16s_1560 | 3.503463263 | 5.787593236  | 3.016353511 | 3.462811431  | 0.839148618 |             | 1 |
| ASV_16s_1561 | 2.450829459 | -9.767417107 | 3.54754792  | 1.325807386  | NA          | NA          |   |
| ASV_16s_1562 | 3.945566978 | -24.66810438 | 3.549933196 | 0.688143244  | NA          | NA          |   |
| ASV_16s_1563 | 3.222851783 | 2.300434048  | 3.547569142 | 3.056574827  | 0.879719715 |             | 1 |
| ASV_16s_1564 | 1.066101797 | -22.08497199 | 3.550616356 | 0.135754802  | NA          | NA          |   |
| ASV_16s_1565 | 3.455688532 | 8.803628768  | 3.29242036  | 3.305578256  | 0.855368984 |             | 1 |
| ASV_16s_1566 | 1.769210852 | -1.869268601 | 3.546623275 | 1.924051865  | 0.963923977 | NA          |   |
| ASV_16s_1567 | 2.923288534 | 1.394856703  | 3.545421612 | 1.309125389  | NA          | NA          |   |
| ASV_16s_1568 | 3.264405943 | -0.112752979 | 2.983431768 | 5.863380078  | 0.555789445 |             | 1 |
| ASV_16s_1569 | 4.039156514 | -0.082893058 | 2.810735183 | 7.679827706  | 0.361670962 |             | 1 |
| ASV_16s_1570 | 2.942329477 | 9.109470987  | 2.812160868 | 2.599016573  | NA          | NA          |   |
| ASV_16s_1571 | 3.247803996 | 7.769321439  | 3.548078786 | 2.489116204  | 0.927914393 |             | 1 |
| ASV_16s_1572 | 5.108070266 | 1.051534168  | 2.66281336  | 6.550011606  | 0.47718392  |             | 1 |
| ASV_16s_1573 | 4.044852428 | 0.245800991  | 3.539081544 | 4.405968708  | 0.732008635 |             | 1 |
| ASV_16s_1574 | 1.058809719 | -22.21584453 | 3.550616598 | 0.131972644  | NA          | NA          |   |
| ASV_16s_1575 | 3.209180397 | -8.394297338 | 3.549263815 | 2.986036759  | 0.886290933 |             | 1 |
| ASV_16s_1576 | 3.874753107 | 2.959178708  | 2.178383304 | 3.262118498  | 0.859741986 |             | 1 |
| ASV_16s_1577 | 1.367277728 | 18.14325984  | 3.551442522 | 0.39471712   | NA          | NA          |   |
| ASV_16s_1578 | 4.553379808 | 0.987096337  | 3.411332132 | 3.383122666  | 0.847445528 |             | 1 |
| ASV_16s_1579 | 3.017393311 | 9.635587576  | 3.54677666  | 2.241839859  | 0.945252057 |             | 1 |
| ASV_16s_1580 | 5.097782151 | 16.20526359  | 3.017141312 | 4.08216512   | 0.770266463 |             | 1 |
| ASV_16s_1581 | 4.460929066 | 3.054450505  | 3.54880673  | 3.255831974  | 0.860370412 |             | 1 |
| ASV_16s_1582 | 3.320014505 | 0.149707133  | 3.401921796 | 4.361632224  | 0.737308592 |             | 1 |
| ASV_16s_1583 | 3.649406761 | 0.18006746   | 1.898444554 | 5.771000117  | 0.566728563 |             | 1 |
| ASV_16s_1584 | 4.486683773 | 0.034142193  | 1.989358109 | 16.51684863  | 0.020791821 | 0.158292451 |   |
| ASV_16s_1585 | 3.050013103 | -8.280827686 | 3.549304304 | 2.832957912  | 0.900012986 |             | 1 |
| ASV_16s_1586 | 3.380234801 | 0.84945649   | 2.274637934 | 6.155139249  | 0.521756009 |             | 1 |
| ASV_16s_1587 | 4.090698063 | 0.412781727  | 2.339199832 | 12.38730828  | 0.088520091 | 0.482673737 |   |
| ASV_16s_1588 | 3.418179221 | -0.966050352 | 2.720699191 | 4.776241012  | 0.687247823 |             | 1 |
| ASV_16s_1589 | 2.051316294 | -20.75429796 | 3.551434521 | 0.599524062  | 0.99899436  |             | 1 |
| ASV_16s_1590 | 3.089706191 | -0.26007109  | 2.141850438 | 8.712613431  | 0.273953001 |             | 1 |
| ASV_16s_1591 | 2.460635625 | 1.867724943  | 3.547899133 | 2.190280079  | NA          | NA          |   |
| ASV_16s_1592 | 0.824340414 | -23.12865109 | 3.551439951 | 0.154638807  | NA          | NA          |   |
| ASV_16s_1593 | 0.871434999 | -9.76624357  | 3.552157344 | -0.017087604 | NA          | NA          |   |
| ASV_16s_1594 | 1.039850317 | -22.05358522 | 3.550617329 | 0.12201542   | NA          | NA          |   |
| ASV_16s_1595 | 3.921295679 | -1.485607514 | 1.555755828 | 8.77945489   | 0.268880566 |             | 1 |
| ASV_16s_1596 | 2.018270865 | -21.05224221 | 3.552157344 | 0.600704281  | 0.998987873 |             | 1 |
| ASV_16s_1597 | 2.835189058 | -7.106203793 | 2.677250153 | 3.127642784  | 0.872948424 |             | 1 |
| ASV_16s_1598 | 0.87909333  | -22.04806479 | 3.550655441 | 0.056743097  | NA          | NA          |   |
| ASV_16s_1599 | 4.963314275 | 0.175018768  | 2.564001913 | 6.686862057  | 0.462195217 |             | 1 |
| ASV_16s_1600 | 3.110698811 | -8.319739045 | 3.549243269 | 3.005744666  | 0.884470295 |             | 1 |
| ASV_16s_1601 | 3.530075259 | 3.823759986  | 2.540637663 | 6.492736884  | 0.483530335 |             | 1 |
| ASV_16s_1602 | 1.03547507  | -21.82907936 | 3.550617699 | 0.119690301  | NA          | NA          |   |
| ASV_16s_1603 | 3.135599463 | 0.390736972  | 3.549555395 | 1.658563059  | 0.976307456 |             | 1 |
| ASV_16s_1604 | 3.136222814 | 3.413991151  | 2.834189491 | 5.34028534   | 0.618511686 |             | 1 |
| ASV_16s_1605 | 2.730946242 | 0.924756407  | 2.409929475 | 7.859412332  | 0.345153998 |             | 1 |
| ASV_16s_1606 | 3.257797393 | -15.05557661 | 3.54739728  | 1.195560175  | NA          | NA          |   |
| ASV_16s_1607 | 3.142847866 | -1.041604187 | 2.948169863 | 4.200005941  | 0.756474031 |             | 1 |
| ASV_16s_1608 | 3.382997    | -10.54880871 | 3.548648615 | 2.704548656  | 0.910923615 |             | 1 |
| ASV_16s_1609 | 3.650466667 | -12.72244414 | 2.662497623 | 6.529323512  | 0.4794714   |             | 1 |

|              |             |              |             |              |             |             |
|--------------|-------------|--------------|-------------|--------------|-------------|-------------|
| ASV_16s_1610 | 4.856430768 | -29.71616192 | 3.549038768 | 0.458537101  | 0.999584586 | 1           |
| ASV_16s_1611 | 3.717936262 | 0.302120227  | 2.541437789 | 6.416747501  | 0.492014998 | 1           |
| ASV_16s_1612 | 3.628909376 | -0.432102169 | 1.940911973 | 8.062187841  | 0.327142215 | 1           |
| ASV_16s_1613 | 4.040067003 | 0.132670012  | 3.082779315 | 3.413785623  | 0.844271077 | 1           |
| ASV_16s_1614 | 3.453826876 | -0.262892949 | 3.546337492 | 2.328645577  | 0.939438437 | 1           |
| ASV_16s_1615 | 3.215100384 | 0.473491336  | 3.549266153 | 0.828926945  | NA          | NA          |
| ASV_16s_1616 | 3.134072148 | 2.850594104  | 3.5445344   | 3.556442413  | NA          | NA          |
| ASV_16s_1617 | 3.52651237  | 0.412759834  | 2.790962181 | 6.028965607  | 0.536371286 | 1           |
| ASV_16s_1618 | 2.294361132 | -9.539007651 | 3.54936541  | 1.041276059  | 0.994134934 | 1           |
| ASV_16s_1619 | 3.334716531 | 1.471245559  | 1.618965263 | 13.11707836  | 0.069306662 | 0.409247386 |
| ASV_16s_1620 | 3.624170685 | -0.771323346 | 2.856993973 | 5.133143197  | 0.643718968 | 1           |
| ASV_16s_1621 | 3.538421941 | 0.206615076  | 2.416677303 | 7.893227934  | 0.342103133 | 1           |
| ASV_16s_1622 | 4.288532721 | -1.142605754 | 3.545011815 | 3.88340644   | NA          | NA          |
| ASV_16s_1623 | 4.218504883 | 1.053613757  | 3.156010926 | 5.072306234  | 0.65113963  | 1           |
| ASV_16s_1624 | 3.381168545 | 0.972023908  | 2.333996747 | 7.408153763  | 0.387654134 | 1           |
| ASV_16s_1625 | 3.626420112 | -0.995553236 | 2.942786556 | 3.750339767  | 0.808042383 | 1           |
| ASV_16s_1626 | 1.019432498 | -22.11252333 | 3.550618323 | 0.111086529  | NA          | NA          |
| ASV_16s_1627 | 3.910177752 | 4.074147085  | 1.461213828 | 11.77383453  | 0.108246069 | 0.549782513 |
| ASV_16s_1628 | 4.132745335 | 0.751387149  | 2.331346206 | 8.11224104   | 0.322800797 | 1           |
| ASV_16s_1629 | 3.728249006 | -0.799652341 | 3.220657512 | 4.043131257  | 0.774796343 | 1           |
| ASV_16s_1630 | 2.669334057 | 10.66807947  | 3.547251015 | -0.230978176 | 1           | 1           |
| ASV_16s_1631 | 3.354161196 | -1.259840296 | 2.538488239 | 7.020605806  | 0.426737548 | 1           |
| ASV_16s_1632 | 3.36164722  | -0.831309263 | 3.10629307  | 4.675702046  | 0.699469449 | 1           |
| ASV_16s_1633 | 4.324404523 | 2.2199204    | 3.548530923 | 3.549378378  | 0.829968044 | 1           |
| ASV_16s_1634 | 3.352255428 | -1.037956764 | 2.078118772 | 7.8908092    | 0.342320727 | 1           |
| ASV_16s_1635 | 3.296866376 | 1.620973547  | 2.738821417 | 4.697366472  | 0.69683902  | 1           |
| ASV_16s_1636 | 3.748281753 | -1.264487206 | 3.426657916 | 1.643910589  | 0.976905443 | 1           |
| ASV_16s_1637 | 4.526814824 | -0.791128231 | 2.171270929 | 11.42009013  | 0.12131565  | 0.596961766 |
| ASV_16s_1638 | 2.93555208  | -8.236789017 | 3.549296537 | 2.79650767   | 0.90316724  | 1           |
| ASV_16s_1639 | 2.908059559 | -1.296010039 | 2.083700411 | 3.724730137  | NA          | NA          |
| ASV_16s_1640 | 3.110517026 | 1.965993977  | 2.326558177 | 7.543704407  | 0.374541191 | 1           |
| ASV_16s_1641 | 0.542694144 | -22.50464482 | 3.551441217 | -0.101507112 | NA          | NA          |
| ASV_16s_1642 | 3.061848231 | -9.170189217 | 3.548914738 | 2.542958489  | 0.923827658 | 1           |
| ASV_16s_1643 | 4.256572956 | 1.065335207  | 1.517086152 | 20.14625868  | 0.005262282 | 0.050756909 |
| ASV_16s_1644 | 3.092876482 | 2.633834753  | 3.038723896 | 5.005931558  | 0.659239334 | 1           |
| ASV_16s_1645 | 3.684365721 | -0.345329034 | 3.290699781 | 5.114564766  | 0.645984595 | 1           |
| ASV_16s_1646 | 3.082771323 | -28.85792356 | 3.549453633 | 0.776229535  | 0.997679038 | 1           |
| ASV_16s_1647 | 1.077015502 | -23.3674372  | 3.549373743 | 0.772278455  | NA          | NA          |
| ASV_16s_1648 | 0.891993866 | -22.08453613 | 3.551442646 | 1.467912831  | 0.983399772 | NA          |
| ASV_16s_1649 | 3.217981037 | -3.778667865 | 2.412768976 | 5.806449876  | 0.562522438 | 1           |
| ASV_16s_1650 | 4.852856246 | 15.73891626  | 3.55062507  | 2.785193675  | NA          | NA          |
| ASV_16s_1651 | 1.003389927 | -22.04696301 | 3.55061892  | 0.102346603  | NA          | NA          |
| ASV_16s_1652 | 0.939437394 | -18.99863607 | 3.551490439 | 0.607441583  | NA          | NA          |
| ASV_16s_1653 | 1.814055163 | -7.109142884 | 3.552157344 | 0.64943104   | NA          | NA          |
| ASV_16s_1654 | 3.181449044 | 2.029094079  | 2.750978972 | 4.460024719  | 0.725525474 | 1           |
| ASV_16s_1655 | 4.127385819 | 1.877274255  | 3.548400408 | 3.381552308  | 0.847607484 | 1           |
| ASV_16s_1656 | 3.617599535 | 4.948894878  | 2.078941417 | 4.466437638  | 0.724754891 | 1           |
| ASV_16s_1657 | 3.711879167 | 0.133494211  | 3.278009714 | 2.125063228  | 0.952595106 | 1           |
| ASV_16s_1658 | 3.514818749 | 19.6453447   | 3.546534041 | -0.365723838 | 1           | 1           |
| ASV_16s_1659 | 3.110523246 | -0.503427078 | 1.824571512 | 5.417760206  | 0.609121182 | 1           |
| ASV_16s_1660 | 3.088657853 | 3.379140133  | 3.303412084 | 2.879995792  | 0.895877175 | 1           |
| ASV_16s_1661 | 3.467538919 | -0.591162324 | 2.006568788 | 5.430238283  | 0.607611245 | 1           |
| ASV_16s_1662 | 1.83351747  | -2.030951004 | 3.355539701 | 2.970771906  | NA          | NA          |
| ASV_16s_1663 | 3.643204064 | -20.72117904 | 3.550881976 | 1.615166225  | 0.978052765 | 1           |
| ASV_16s_1664 | 3.136783338 | -9.69652616  | 3.28953421  | 3.012946658  | 0.883801981 | 1           |
| ASV_16s_1665 | 2.796834776 | 1.792230232  | 3.545885686 | 3.810192651  | 0.801361623 | 1           |
| ASV_16s_1666 | 3.3768773   | 1.390588237  | 3.546595902 | 3.645738186  | 0.819556661 | 1           |
| ASV_16s_1667 | 3.509255987 | -0.922739052 | 3.547273544 | 3.035648285  | 0.881684997 | 1           |
| ASV_16s_1668 | 3.115037843 | 3.373908408  | 3.336839276 | 3.045146279  | 0.880794643 | 1           |
| ASV_16s_1669 | 2.375392149 | 13.43904849  | 3.551446424 | 1.639166928  | NA          | NA          |
| ASV_16s_1670 | 2.513549382 | 2.036980454  | 3.547415976 | 2.575333352  | NA          | NA          |
| ASV_16s_1671 | 2.114699381 | 0.906528065  | 3.549484558 | 0.923202635  | 0.995974117 | 1           |
| ASV_16s_1672 | 3.039983268 | 1.783616877  | 2.998230993 | 5.297512566  | 0.623706302 | 1           |
| ASV_16s_1673 | 1.981769512 | -30          | 3.550600713 | 0.89030542   | 0.996409471 | NA          |
| ASV_16s_1674 | 1.308080946 | -6.604955124 | 3.552157344 | 0.448831921  | 0.99961311  | NA          |
| ASV_16s_1675 | 2.902312878 | -6.583895369 | 3.550595344 | 2.554080873  | 0.922969964 | 1           |
| ASV_16s_1676 | 2.914768536 | 8.136762278  | 3.548206739 | 1.915090167  | 0.964389981 | 1           |



|              |             |              |             |             |             |             |  |
|--------------|-------------|--------------|-------------|-------------|-------------|-------------|--|
| ASV_16s_1677 | 4.905227832 | -25.82623111 | 3.548089572 | 0.21129989  | NA          | NA          |  |
| ASV_16s_1678 | 3.800890169 | 0.348476027  | 2.547724173 | 10.03798949 | 0.186430841 | 0.803223968 |  |
| ASV_16s_1679 | 2.949098886 | -8.227121184 | 3.549271376 | 2.896828462 | 0.894379533 | 1           |  |
| ASV_16s_1680 | 1.889551253 | -12.12697742 | 3.552157344 | 0.674440405 | 0.998524509 | NA          |  |
| ASV_16s_1681 | 3.547978628 | 0.025250374  | 2.870107108 | 6.511374966 | 0.481460466 | 1           |  |
| ASV_16s_1682 | 3.20813071  | -0.811795184 | 2.04563794  | 9.080731265 | 0.246911743 | 0.964516234 |  |
| ASV_16s_1683 | 3.21434747  | 2.569561955  | 1.998891215 | 9.114561016 | 0.244535385 | 0.961181421 |  |
| ASV_16s_1684 | 2.920811689 | -22.06630643 | 3.550598587 | 2.493078036 | 0.927617393 | 1           |  |
| ASV_16s_1685 | 2.922621152 | 2.425526399  | 3.545526434 | 3.794472386 | 0.803122534 | 1           |  |
| ASV_16s_1686 | 3.053433336 | -8.379193178 | 3.549471607 | 1.862877815 | 0.967038322 | 1           |  |
| ASV_16s_1687 | 0.920904787 | -14.20330122 | 3.552157344 | 0.233639418 | NA          | NA          |  |
| ASV_16s_1688 | 3.544093114 | -0.967998265 | 2.576148763 | 5.222937989 | 0.632777571 | 1           |  |
| ASV_16s_1689 | 3.255607603 | -0.935943346 | 2.24087103  | 6.965255797 | 0.432506371 | 1           |  |
| ASV_16s_1690 | 3.722669139 | 0.368344696  | 2.695723959 | 0.807985293 | 0.997361604 | 1           |  |
| ASV_16s_1691 | 1.951070612 | -5.32997065  | 3.550653705 | 1.413087984 | 0.985167016 | NA          |  |
| ASV_16s_1692 | 0.977138446 | -22.0367925  | 3.550620222 | 0.087737487 | NA          | NA          |  |
| ASV_16s_1693 | 3.333123083 | 0.216615431  | 2.509134058 | 8.198266306 | 0.315436222 | 1           |  |
| ASV_16s_1694 | 3.246083147 | -8.850922996 | 3.546551793 | 1.059062865 | 0.993818683 | 1           |  |
| ASV_16s_1695 | 2.825701992 | 8.885421403  | 3.464099192 | 1.655850863 | 0.976418815 | 1           |  |
| ASV_16s_1696 | 3.935479471 | 1.8348278    | 3.549429756 | 2.077739863 | 0.955412515 | 1           |  |
| ASV_16s_1697 | 0.605261919 | -22.62012481 | 3.551440836 | -0.03468763 | NA          | NA          |  |
| ASV_16s_1698 | 3.154351821 | 6.470753862  | 2.639432294 | 4.733766365 | 0.692415392 | 1           |  |
| ASV_16s_1699 | 4.334864086 | 11.72231555  | 3.544459944 | 1.52161693  | 0.981551832 | 1           |  |
| ASV_16s_1700 | 3.398199784 | -10.25163423 | 3.547539092 | 1.476019866 | 0.983128257 | 1           |  |
| ASV_16s_1701 | 4.081512069 | 1.049088884  | 2.908882546 | 3.949667989 | 0.785556105 | 1           |  |
| ASV_16s_1702 | 0.974221615 | -22.0250425  | 3.55062033  | 0.086090488 | NA          | NA          |  |
| ASV_16s_1703 | 0.810168823 | -22.71865389 | 3.551440361 | 0.912465412 | NA          | NA          |  |
| ASV_16s_1704 | 3.492141287 | 5.922758527  | 2.734844716 | 4.706054273 | 0.69578365  | 1           |  |
| ASV_16s_1705 | 3.129998031 | 1.434912205  | 2.734821496 | 5.189529218 | 0.63684638  | 1           |  |
| ASV_16s_1706 | 4.115382216 | -7.492687163 | 3.184707692 | 4.557502463 | 0.713782402 | 1           |  |
| ASV_16s_1707 | 2.986346246 | 1.073346862  | 3.05003897  | 4.719999701 | 0.694089003 | 1           |  |
| ASV_16s_1708 | 3.510018994 | -0.928168026 | 3.26640254  | 3.470359488 | 0.838354931 | 1           |  |
| ASV_16s_1709 | 2.32857394  | 3.062209313  | 3.546082276 | 1.481126609 | NA          | NA          |  |
| ASV_16s_1710 | 1.872416602 | -16.06376256 | 3.552157344 | 0.305314732 | 0.999893839 | NA          |  |
| ASV_16s_1711 | 3.368321417 | -1.653438858 | 3.390513348 | 2.725142505 | 0.909212037 | 1           |  |
| ASV_16s_1712 | 4.299745187 | 0.761933481  | 3.546881173 | 5.007040411 | NA          | NA          |  |
| ASV_16s_1713 | 0.945746138 | -0.014677687 | 3.550557508 | 3.094942213 | 0.876082536 | NA          |  |
| ASV_16s_1714 | 4.699112297 | -4.678781134 | 3.552157344 | 0.932101978 | NA          | NA          |  |
| ASV_16s_1715 | 2.045118652 | -21.94012476 | 3.552042038 | 0.394351631 | 0.999748806 | 1           |  |
| ASV_16s_1716 | 3.031967472 | 6.881219377  | 3.548103827 | 1.49002975  | 0.982652823 | 1           |  |
| ASV_16s_1717 | 5.741871329 | -8.700935797 | 3.547551004 | 3.066395654 | NA          | NA          |  |
| ASV_16s_1718 | 3.531468873 | 0.600870957  | 2.766036868 | 6.156651118 | 0.521581898 | 1           |  |
| ASV_16s_1719 | 0.966929537 | -21.96392304 | 3.550620658 | 0.081950836 | NA          | NA          |  |
| ASV_16s_1720 | 2.960304812 | -8.143968448 | 3.549502455 | 2.620659603 | 0.917740612 | 1           |  |
| ASV_16s_1721 | 3.397222409 | -1.608967231 | 3.549265157 | 3.635056082 | 0.820720372 | 1           |  |
| ASV_16s_1722 | 3.62585119  | 2.242529081  | 2.415510354 | 5.341758429 | 0.618332905 | 1           |  |
| ASV_16s_1723 | 3.536268359 | -0.797537556 | 3.547585967 | 3.306500194 | 0.855275682 | 1           |  |
| ASV_16s_1724 | 2.712738168 | -0.273100228 | 2.489772728 | 2.704363586 | 0.910938929 | 1           |  |
| ASV_16s_1725 | 3.423111969 | -0.584080032 | 1.530979916 | 10.5321138  | 0.160370043 | 0.723009076 |  |
| ASV_16s_1726 | 2.649279137 | 0.425391979  | 1.491795686 | 4.965582007 | 0.664163571 | 1           |  |
| ASV_16s_1727 | 3.577115847 | -30          | 3.549887972 | 2.303454277 | 0.9411564   | 1           |  |
| ASV_16s_1728 | 3.495222743 | -30          | 3.549892196 | 2.298111132 | 0.941517557 | 1           |  |
| ASV_16s_1729 | 4.292298025 | 29.47610553  | 3.548243848 | 0.188524126 | NA          | NA          |  |
| ASV_16s_1730 | 3.527479958 | -0.866680194 | 3.255844928 | 3.590570541 | 0.825541332 | 1           |  |
| ASV_16s_1731 | 3.100822137 | -29.38043068 | 3.549231358 | 1.786623778 | 0.970701446 | 1           |  |
| ASV_16s_1732 | 2.998733242 | -0.629902612 | 2.779579194 | 4.872544401 | 0.67551384  | 1           |  |
| ASV_16s_1733 | 3.643668883 | 2.492279928  | 3.546677572 | 1.549045674 | NA          | NA          |  |
| ASV_16s_1734 | 3.10052032  | 1.154889867  | 2.62137315  | 7.61013322  | 0.368222913 | 1           |  |
| ASV_16s_1735 | 0.024511954 | 0.028553451  | 3.551938175 | 0.112869894 | 0.999996487 | NA          |  |
| ASV_16s_1736 | 3.4616759   | -0.303884994 | 2.305648533 | 10.54003805 | 0.159978667 | 0.722590209 |  |
| ASV_16s_1737 | 3.224124574 | -1.175714329 | 2.485201225 | 4.708460686 | 0.695491275 | 1           |  |
| ASV_16s_1738 | 3.965736055 | 0.560208893  | 3.549217564 | 3.710034383 | 0.812504121 | 1           |  |
| ASV_16s_1739 | 3.10251543  | 1.002640256  | 3.545181356 | 3.568208811 | 0.827948967 | 1           |  |
| ASV_16s_1740 | 3.513811507 | -0.931499842 | 2.936168538 | 4.009524814 | 0.778679683 | 1           |  |
| ASV_16s_1741 | 3.404222405 | -2.124242287 | 1.983343249 | 6.073898448 | 0.531147636 | 1           |  |
| ASV_16s_1742 | 4.864011091 | 1.809599933  | 2.777479721 | 3.229924954 | 0.862948982 | 1           |  |
| ASV_16s_1743 | 3.876264832 | 0.603832413  | 2.236403832 | 9.468211063 | 0.220764242 | 0.907419746 |  |

|              |             |              |             |              |             |             |   |
|--------------|-------------|--------------|-------------|--------------|-------------|-------------|---|
| ASV_16s_1744 | 0.816736388 | -6.609873296 | 3.550662441 | 0.081803711  | NA          | NA          |   |
| ASV_16s_1745 | 3.207149803 | -2.683571888 | 2.78184082  | 3.675198948  | 0.816335285 |             | 1 |
| ASV_16s_1746 | 2.84162373  | -1.844463013 | 2.57369732  | 1.823849837  | 0.968943525 |             | 1 |
| ASV_16s_1747 | 4.032277695 | 0.94405686   | 2.920982895 | 4.392201226  | 0.733656151 |             | 1 |
| ASV_16s_1748 | 4.988421885 | -1.539874456 | 3.550121793 | 2.47407762   | NA          | NA          |   |
| ASV_16s_1749 | 4.792341706 | 2.810029894  | 3.546034922 | 1.496657302  | NA          | NA          |   |
| ASV_16s_1750 | 2.624509661 | 3.907603442  | 2.42457108  | 3.073234523  | 0.878145762 |             | 1 |
| ASV_16s_1751 | 3.695963383 | 0.399954452  | 3.550019464 | 1.292225203  | 0.988646172 |             | 1 |
| ASV_16s_1752 | 2.896477934 | 10.26731069  | 3.547186786 | 2.574768458  | 0.921362488 |             | 1 |
| ASV_16s_1753 | 3.778268227 | 0.959480472  | 2.65930351  | 6.765645041  | 0.453682023 |             | 1 |
| ASV_16s_1754 | 3.677565325 | 0.94394031   | 3.549383407 | 1.970897879  | 0.961433511 |             | 1 |
| ASV_16s_1755 | 3.250497826 | -0.34702614  | 2.194015321 | 10.03823178  | 0.186417241 | 0.803223968 |   |
| ASV_16s_1756 | 3.196170883 | 0.57786087   | 2.762936983 | 7.482192699  | 0.380455247 |             | 1 |
| ASV_16s_1757 | 2.977450045 | 3.04365458   | 2.671121952 | 5.795525295  | 0.563817557 |             | 1 |
| ASV_16s_1758 | 3.534421235 | 1.7530131    | 3.100459703 | 4.19031896   | 0.757614047 |             | 1 |
| ASV_16s_1759 | 1.466206787 | -21.05855265 | 3.551447436 | 1.633981201  | 0.977305628 | NA          |   |
| ASV_16s_1760 | 2.844985884 | -8.162738042 | 3.549331308 | 2.851031774  | 0.898432481 |             | 1 |
| ASV_16s_1761 | 2.556103828 | 2.339331534  | 3.545735971 | 3.545906169  | NA          | NA          |   |
| ASV_16s_1762 | 3.713368712 | -0.958489891 | 2.555649185 | 6.086338391  | 0.529705068 |             | 1 |
| ASV_16s_1763 | 3.83304434  | -0.230054788 | 3.545925044 | 3.043135465  | 0.880983367 |             | 1 |
| ASV_16s_1764 | 3.961132076 | 17.8957096   | 3.550749769 | 0.864177485  | 0.996732514 |             | 1 |
| ASV_16s_1765 | 3.503678087 | -0.153467657 | 3.269362267 | 5.041217517  | 0.654933123 |             | 1 |
| ASV_16s_1766 | 3.016820671 | -26.76910157 | 3.551452209 | 2.027501325  | 0.958302549 |             | 1 |
| ASV_16s_1767 | 4.028944097 | 0.730618391  | 3.53947439  | 3.62865848   | 0.821416213 |             | 1 |
| ASV_16s_1768 | 0.5066191   | -22.36090992 | 3.551441481 | -0.143629019 | NA          | NA          |   |
| ASV_16s_1769 | 2.818472073 | -8.254586985 | 3.549399798 | 2.517504847  | 0.925773174 |             | 1 |
| ASV_16s_1770 | 3.813941063 | -0.455886972 | 2.705320564 | 7.610724096  | 0.368167033 |             | 1 |
| ASV_16s_1771 | 3.36877222  | 1.790898493  | 1.638568286 | 14.54140646  | 0.042348397 | 0.274867208 |   |
| ASV_16s_1772 | 0.940678056 | -21.8418254  | 3.550621882 | 0.06678551   | NA          | NA          |   |
| ASV_16s_1773 | 3.21480407  | -1.088425802 | 2.350514622 | 5.245740216  | 0.630002158 |             | 1 |
| ASV_16s_1774 | 3.116404765 | -10.10079543 | 3.548000013 | 2.784127112  | 0.904228405 |             | 1 |
| ASV_16s_1775 | 3.957676927 | 0.492983644  | 3.180390176 | 6.566916396  | 0.475318909 |             | 1 |
| ASV_16s_1776 | 3.901084335 | -2.568622744 | 3.549836177 | 2.330300499  | 0.9393247   |             | 1 |
| ASV_16s_1777 | 3.389581816 | -0.868606931 | 2.922715305 | 4.088725313  | 0.769503171 |             | 1 |
| ASV_16s_1778 | 3.687960349 | -14.34322222 | 3.552157344 | 1.138641592  | 0.992271737 |             | 1 |
| ASV_16s_1779 | 3.382874231 | -0.799620584 | 3.227379874 | 3.760664818  | 0.806894536 |             | 1 |
| ASV_16s_1780 | 2.887652179 | -1.153953635 | 2.662120399 | 2.825545615  | 0.900658025 |             | 1 |
| ASV_16s_1781 | 3.55571428  | 0.088519718  | 3.547950837 | 4.206322239  | 0.755730128 |             | 1 |
| ASV_16s_1782 | 1.832600491 | -14.42871048 | 3.552157344 | 0.655658437  | 0.998653724 | NA          |   |
| ASV_16s_1783 | 2.638678153 | 1.668108878  | 2.041034394 | 5.450223729  | 0.605194426 |             | 1 |
| ASV_16s_1784 | 2.288621409 | -4.861808499 | 3.547673584 | 1.477582053  | 0.983075635 |             | 1 |
| ASV_16s_1785 | 0.933385978 | -22.02889104 | 3.550622242 | 0.06249786   | NA          | NA          |   |
| ASV_16s_1786 | 3.31942007  | -0.312053931 | 2.946142421 | 6.693772031  | 0.461445102 |             | 1 |
| ASV_16s_1787 | 2.644146801 | 3.597655964  | 3.450990232 | 3.026488872  | 0.882541024 |             | 1 |
| ASV_16s_1788 | 3.122446258 | -1.667357569 | 3.549516886 | 0.925473644  | NA          | NA          |   |
| ASV_16s_1789 | 2.915596272 | 0.466088635  | 3.549339006 | 0.830034619  | NA          | NA          |   |
| ASV_16s_1790 | 4.140114494 | 0.849802127  | 3.539515216 | 3.568110403  | 0.827959539 |             | 1 |
| ASV_16s_1791 | 3.281106736 | -0.770741927 | 2.903189219 | 4.058760383  | 0.772985035 |             | 1 |
| ASV_16s_1792 | 2.608211631 | 2.659945643  | 2.21060922  | 3.860070928  | 0.795746154 |             | 1 |
| ASV_16s_1793 | 3.561691329 | 1.187328951  | 3.158605645 | 2.782812918  | 0.904340742 |             | 1 |
| ASV_16s_1794 | 1.803347638 | -13.17741935 | 3.552157344 | 0.645788045  | 0.998718491 | NA          |   |
| ASV_16s_1795 | 2.794417213 | 3.270376139  | 2.945433876 | 2.483527624  | 0.928332335 |             | 1 |
| ASV_16s_1796 | 3.342271241 | 0.147412726  | 1.987879973 | 12.52364089  | 0.08460112  | 0.464442884 |   |
| ASV_16s_1797 | 3.422608772 | -0.799429352 | 3.212314641 | 4.027022628  | 0.776659719 |             | 1 |
| ASV_16s_1798 | 2.697332784 | 9.177376196  | 3.547820525 | 2.667774773  | 0.913942817 |             | 1 |
| ASV_16s_1799 | 2.955765159 | 2.335634825  | 2.458916036 | 6.135161137  | 0.52405905  |             | 1 |
| ASV_16s_1800 | 3.177089065 | 0.077790943  | 1.528215636 | 12.01602586  | 0.100033079 | 0.524199319 |   |
| ASV_16s_1801 | 3.617435833 | 0.857243871  | 3.546105483 | 4.308967502  | NA          | NA          |   |
| ASV_16s_1802 | 4.02123382  | -17.80127936 | 3.552157344 | 0.349830364  | NA          | NA          |   |
| ASV_16s_1803 | 2.867521918 | -1.210944932 | 3.545776127 | 2.840273916  | NA          | NA          |   |
| ASV_16s_1804 | 0.551361388 | -0.170366648 | 3.550554409 | 1.316534049  | 0.987991752 | NA          |   |
| ASV_16s_1805 | 2.957964509 | -1.302239537 | 2.682794928 | 2.763493719  | 0.905985337 |             | 1 |
| ASV_16s_1806 | 3.637527635 | 4.768761641  | 2.589082726 | 2.216474052  | 0.946894017 |             | 1 |
| ASV_16s_1807 | 2.02022543  | -9.227482324 | 3.549548128 | 1.041485873  | NA          | NA          |   |
| ASV_16s_1808 | 3.654398767 | 0.249792669  | 3.547962689 | 2.249539187  | 0.944748556 |             | 1 |
| ASV_16s_1809 | 0.861890025 | -12.60327427 | 3.552157344 | 0.193034624  | NA          | NA          |   |
| ASV_16s_1810 | 2.696808915 | 10.12862261  | 3.546820834 | 2.229025094  | 0.946084808 |             | 1 |

|              |             |              |             |             |             |             |   |
|--------------|-------------|--------------|-------------|-------------|-------------|-------------|---|
| ASV_16s_1811 | 3.120131456 | 1.009121769  | 2.4390043   | 7.149291109 | 0.413503155 |             | 1 |
| ASV_16s_1812 | 3.688918363 | 1.282527019  | 1.467010402 | 14.53320492 | 0.042470912 | 0.274925339 |   |
| ASV_16s_1813 | 3.202476399 | -0.248168951 | 2.698394864 | 2.983403151 | 0.886533318 |             | 1 |
| ASV_16s_1814 | 0.96609018  | -14.23281284 | 3.552157344 | 0.262978878 | 0.999936    | NA          |   |
| ASV_16s_1815 | 1.137685563 | -11.95778404 | 3.552157344 | 0.363234851 | NA          | NA          |   |
| ASV_16s_1816 | 4.302286435 | 0.383869715  | 2.776569201 | 6.222472831 | 0.514025983 |             | 1 |
| ASV_16s_1817 | 2.627914063 | 0.317907865  | 2.363587882 | 6.464642386 | 0.486658775 |             | 1 |
| ASV_16s_1818 | 2.514419946 | -23.43824656 | 3.551440881 | 0.913880921 | 0.996100767 |             | 1 |
| ASV_16s_1819 | 3.628142876 | 0.315939287  | 3.550607018 | 2.415052018 | 0.933356759 |             | 1 |
| ASV_16s_1820 | 3.269803479 | 1.325632593  | 3.035138154 | 5.090869498 | 0.64887489  |             | 1 |
| ASV_16s_1821 | 2.455528155 | 2.394790337  | 3.54465248  | 2.184532505 | NA          | NA          |   |
| ASV_16s_1822 | 2.930633718 | 0.562843805  | 2.399545943 | 2.367732463 | 0.936723398 |             | 1 |
| ASV_16s_1823 | 2.999543341 | 2.671080905  | 1.713806484 | 8.832331475 | 0.264919236 |             | 1 |
| ASV_16s_1824 | 3.852423282 | -0.306134198 | 3.546326858 | 2.641410059 | NA          | NA          |   |
| ASV_16s_1825 | 3.521336815 | 17.70977872  | 3.550590497 | 0.698189882 | 0.998349606 |             | 1 |
| ASV_16s_1826 | 2.773116807 | -10.03182574 | 3.549120307 | 2.016330454 | 0.958930984 |             | 1 |
| ASV_16s_1827 | 3.287414514 | -30          | 3.549887725 | 2.18008027  | 0.949204483 |             | 1 |
| ASV_16s_1828 | 3.087868541 | -0.456017932 | 1.738125214 | 13.05028003 | 0.070892763 | 0.41279216  |   |
| ASV_16s_1829 | 0.863540044 | 0.291659516  | 3.54987334  | 3.073328891 | 0.878136823 | NA          |   |
| ASV_16s_1830 | 2.667320705 | 1.876520748  | 3.364480883 | 4.010713731 | 0.77854257  |             | 1 |
| ASV_16s_1831 | 3.046302213 | -0.279203556 | 2.808853945 | 6.227038866 | 0.513503617 |             | 1 |
| ASV_16s_1832 | 3.610862048 | 11.20348403  | 3.547752913 | 2.399937391 | 0.934441555 |             | 1 |
| ASV_16s_1833 | 3.107712227 | 1.056358551  | 2.263342504 | 3.630617076 | 0.821203274 |             | 1 |
| ASV_16s_1834 | 3.582638657 | 1.334087036  | 2.321451409 | 8.479772654 | NA          | NA          |   |
| ASV_16s_1835 | 2.844171275 | 0.362661812  | 2.23030337  | 4.488144528 | 0.722144399 |             | 1 |
| ASV_16s_1836 | 3.617527194 | 0.694121679  | 3.550572771 | 2.347881773 | 0.938109748 |             | 1 |
| ASV_16s_1837 | 3.078854588 | -0.712598092 | 1.757941673 | 12.8451667  | 0.075971949 | 0.43074494  |   |
| ASV_16s_1838 | 3.278898375 | -0.797372622 | 3.547618343 | 3.260988976 | 0.859854975 |             | 1 |
| ASV_16s_1839 | 3.211845197 | -2.525321729 | 3.546013531 | 2.818089804 | 0.901304998 |             | 1 |
| ASV_16s_1840 | 3.320603043 | -0.416051009 | 1.285252604 | 22.48059676 | 0.002098194 | 0.023408884 |   |
| ASV_16s_1841 | 1.556913205 | 2.609734851  | 3.54677309  | 0.631525204 | 0.998808343 | NA          |   |
| ASV_16s_1842 | 3.103458015 | -0.762430982 | 2.577494852 | 5.925949148 | 0.548422093 |             | 1 |
| ASV_16s_1843 | 3.579961337 | 0.363516111  | 3.549507302 | 1.861268903 | 0.967118122 |             | 1 |
| ASV_16s_1844 | 2.758323075 | -23.31467702 | 3.550601058 | 2.443782928 | 0.931270442 |             | 1 |
| ASV_16s_1845 | 1.035010067 | 0.074133582  | 3.550571908 | 3.176629298 | 0.868195916 | NA          |   |
| ASV_16s_1846 | 2.635144989 | 1.530564969  | 3.54509188  | 3.326282507 | 0.853268374 |             | 1 |
| ASV_16s_1847 | 3.337908081 | -0.931010157 | 2.898601127 | 4.33083615  | 0.740979911 |             | 1 |
| ASV_16s_1848 | 2.555132868 | 3.212761955  | 3.421321183 | 3.437366219 | 0.84181438  |             | 1 |
| ASV_16s_1849 | 3.182976273 | -0.504519755 | 1.883722886 | 10.95712912 | 0.140499991 | 0.663061361 |   |
| ASV_16s_1850 | 1.625343904 | -0.882970272 | 3.549012773 | 1.276326322 | 0.989062041 | NA          |   |
| ASV_16s_1851 | 2.060081615 | -0.551162587 | 2.858701858 | 2.181014477 | 0.949145845 |             | 1 |
| ASV_16s_1852 | 1.771907617 | -15.2880032  | 3.552157344 | 0.634965663 | 0.998787069 | NA          |   |
| ASV_16s_1853 | 2.554280756 | -23.19881969 | 3.550599611 | 2.29459978  | NA          | NA          |   |
| ASV_16s_1854 | 2.197444457 | 2.005249777  | 3.547380366 | 2.42494105  | NA          | NA          |   |
| ASV_16s_1855 | 2.295548308 | 0.776710059  | 3.546902942 | 3.889431448 | NA          | NA          |   |
| ASV_16s_1856 | 4.006735631 | 12.46014303  | 3.549464249 | 1.259572745 | 0.989489951 |             | 1 |
| ASV_16s_1857 | 3.213848232 | -0.661730779 | 2.316638236 | 6.967673441 | 0.432253445 |             | 1 |
| ASV_16s_1858 | 2.829191059 | 2.203726839  | 2.171210015 | 2.817852808 | 0.901325532 |             | 1 |
| ASV_16s_1859 | 1.780693941 | 18.31734711  | 3.551441409 | 0.556709022 | NA          | NA          |   |
| ASV_16s_1860 | 2.932022451 | -10.76764655 | 3.54874444  | 2.068490917 | NA          | NA          |   |
| ASV_16s_1861 | 2.002516319 | 21.08422275  | 3.551444139 | 0.954457964 | NA          | NA          |   |
| ASV_16s_1862 | 2.736117481 | -11.67916082 | 3.549207898 | 2.003814968 | NA          | NA          |   |
| ASV_16s_1863 | 4.118032274 | 0.415900965  | 3.175061593 | 4.471413884 | 0.724156736 |             | 1 |
| ASV_16s_1864 | 2.676856197 | 2.061874268  | 3.360306977 | 4.168328764 | 0.760197992 |             | 1 |
| ASV_16s_1865 | 3.222061961 | -0.984861314 | 2.553982621 | 5.955109073 | 0.545000743 |             | 1 |
| ASV_16s_1866 | 1.98525163  | -29.21509813 | 3.549698006 | 0.986415083 | 0.995044713 | NA          |   |
| ASV_16s_1867 | 3.465630011 | 0.107525132  | 2.815343598 | 3.884194808 | 0.793015183 |             | 1 |
| ASV_16s_1868 | 2.43552595  | 2.068114711  | 2.835819909 | 3.399858027 | 0.845715805 |             | 1 |
| ASV_16s_1869 | 3.986317535 | 0.132411852  | 3.143076528 | 3.866220346 | 0.795050915 |             | 1 |
| ASV_16s_1870 | 3.37986528  | -0.108812996 | 3.548996505 | 2.348885458 | 0.938040022 |             | 1 |
| ASV_16s_1871 | 0.894008757 | -21.95743469 | 3.550624343 | 0.038750695 | NA          | NA          |   |
| ASV_16s_1872 | 3.356751376 | 0.021590474  | 3.550492506 | 4.735768368 | 0.692171953 |             | 1 |
| ASV_16s_1873 | 3.309053447 | -0.83729577  | 3.261801937 | 3.403753726 | 0.845312173 |             | 1 |
| ASV_16s_1874 | 2.864876299 | -1.028040086 | 2.601207913 | 5.085632892 | 0.649513728 |             | 1 |
| ASV_16s_1875 | 1.881785572 | 0.007303809  | 3.550367618 | 2.057260452 | 0.956603202 | NA          |   |
| ASV_16s_1876 | 3.190735623 | 3.916661305  | 2.813945525 | 1.847777022 | NA          | NA          |   |
| ASV_16s_1877 | 2.520220326 | 1.818733439  | 2.523443112 | 2.525297932 | 0.925180088 |             | 1 |

|              |             |              |             |                |                |             |
|--------------|-------------|--------------|-------------|----------------|----------------|-------------|
| ASV_16s_1878 | 2.27995683  | 0.669397116  | 3.387224352 | 0.837728949    | 0.997039581    | 1           |
| ASV_16s_1879 | 3.350086733 | 1.67367413   | 3.548389913 | 2.810425932    | 0.901968081    | 1           |
| ASV_16s_1880 | 3.648012464 | 0.914025238  | 3.549290358 | 2.94075028     | 0.890428659    | 1           |
| ASV_16s_1881 | 3.340357622 | 0.099465047  | 3.201822045 | 5.886184356    | 0.553100257    | 1           |
| ASV_16s_1882 | 3.73533064  | 0.363503361  | 3.550424812 | 1.168707452    | 0.991629644    | 1           |
| ASV_16s_1883 | 3.10769563  | 1.233918304  | 2.533180128 | 7.269535109    | 0.401365874    | 1           |
| ASV_16s_1884 | 1.73308522  | -15.3774852  | 3.552157344 | 0.621372967    | 0.998869659 NA |             |
| ASV_16s_1885 | 3.328824619 | -14.5201006  | 3.552157344 | 1.075713158    | 0.993513       | 1           |
| ASV_16s_1886 | 3.717139502 | 17.8380718   | 3.550749179 | 0.82419068     | 0.99718917     | 1           |
| ASV_16s_1887 | 3.177995757 | -0.796866714 | 3.547730685 | 3.276420631    | 0.858308369    | 1           |
| ASV_16s_1888 | 2.296931765 | -7.219023389 | 3.547958104 | 1.841420295    | 0.968093679    | 1           |
| ASV_16s_1889 | 3.287565507 | -1.058658515 | 2.476007431 | 5.047707277    | 0.654141181    | 1           |
| ASV_16s_1890 | 3.626741823 | 0.017740352  | 3.413259316 | 2.300943243    | 0.941326268    | 1           |
| ASV_16s_1891 | 3.806943968 | 2.107595656  | 3.549209125 | 3.871945155    | 0.794403118    | 1           |
| ASV_16s_1892 | 3.074588679 | 1.753512484  | 3.54288905  | 2.630436986 NA | NA             |             |
| ASV_16s_1893 | 4.187067226 | -3.249739392 | 3.544135332 | 1.949801689 NA | NA             |             |
| ASV_16s_1894 | 3.22621357  | -0.151287546 | 2.651048287 | 4.22749486     | 0.753233305    | 1           |
| ASV_16s_1895 | 3.565169077 | -9.03586608  | 3.550052565 | 3.906851158    | 0.790441709    | 1           |
| ASV_16s_1896 | 3.20506174  | -0.797314082 | 3.547630911 | 3.248590993    | 0.86109294     | 1           |
| ASV_16s_1897 | 3.453327007 | 0.213790902  | 2.592194892 | 7.929897364    | 0.338816097    | 1           |
| ASV_16s_1898 | 2.823482019 | 0.026549197  | 3.416931272 | 3.292257872    | 0.856714575    | 1           |
| ASV_16s_1899 | 3.815686105 | 0.459224479  | 2.493088518 | 6.48806307     | 0.484050088    | 1           |
| ASV_16s_1900 | 3.508364054 | 0.267219342  | 3.029910797 | 6.035670627    | 0.535590507    | 1           |
| ASV_16s_1901 | 3.111075004 | -0.005958633 | 2.39250265  | 5.064453145    | 0.652097811    | 1           |
| ASV_16s_1902 | 2.678567433 | 0.775117487  | 2.627108623 | 4.247333537    | 0.750889399    | 1           |
| ASV_16s_1903 | 3.824876644 | 0.624417364  | 2.577455348 | 10.80452982    | 0.14737552     | 0.679611685 |
| ASV_16s_1904 | 2.946879013 | -24.91151077 | 3.54992328  | 2.051153626    | 0.956954907    | 1           |
| ASV_16s_1905 | 1.236246179 | 0.248851309  | 3.545223136 | 1.155734289    | 0.99191065 NA  |             |
| ASV_16s_1906 | 3.227141421 | -0.933206862 | 2.744195091 | 4.41233526     | 0.731246248    | 1           |
| ASV_16s_1907 | 3.302388586 | -0.343116099 | 2.201302681 | 7.213530906    | 0.406991041    | 1           |
| ASV_16s_1908 | 2.142411494 | 0.180811789  | 3.544055798 | 0.53081337 NA  | NA             |             |
| ASV_16s_1909 | 3.730656152 | 0.965638041  | 2.727335617 | 5.10240239     | 0.647468048    | 1           |
| ASV_16s_1910 | 0.877966186 | -21.92830916 | 3.550625245 | 0.028775286 NA | NA             |             |
| ASV_16s_1911 | 2.82050767  | -24.78061431 | 3.54996488  | 2.176439306    | 0.949432678    | 1           |
| ASV_16s_1912 | 1.709405287 | 13.86727606  | 3.551469233 | 0.690159265    | 0.998410211 NA |             |
| ASV_16s_1913 | 1.966970779 | -1.249494007 | 2.973383308 | 2.939438579    | 0.890547543 NA |             |
| ASV_16s_1914 | 2.992722403 | -11.30877611 | 3.552157344 | 0.701626239 NA | NA             |             |
| ASV_16s_1915 | 3.798560045 | 0.242539099  | 3.546949886 | 1.615373833 NA | NA             |             |
| ASV_16s_1916 | 2.48412345  | -7.868199643 | 3.549402537 | 2.454573193 NA | NA             |             |
| ASV_16s_1917 | 3.231234306 | -0.841009623 | 2.87999326  | 4.387152977    | 0.73425987     | 1           |
| ASV_16s_1918 | 3.644263124 | 1.102934006  | 3.549419041 | 2.389408763    | 0.935191983    | 1           |
| ASV_16s_1919 | 3.389334272 | 1.645039489  | 3.549325738 | 2.663704715    | 0.914274028    | 1           |
| ASV_16s_1920 | 3.149648556 | -0.799379975 | 3.199012571 | 3.978803503    | 0.782215576    | 1           |
| ASV_16s_1921 | 3.048648798 | -12.67881318 | 3.545590351 | 1.257015134    | 0.989554349    | 1           |
| ASV_16s_1922 | 1.976489585 | 2.308087355  | 2.907447781 | 3.940044315    | 0.786656687 NA |             |
| ASV_16s_1923 | 2.666087387 | -7.734299959 | 3.54930408  | 2.796499765    | 0.903167919    | 1           |
| ASV_16s_1924 | 3.105749837 | 0.674946613  | 3.172187916 | 5.687934684    | 0.576622695    | 1           |
| ASV_16s_1925 | 3.178739721 | -0.741537747 | 2.857679921 | 4.998391952    | 0.660159478    | 1           |
| ASV_16s_1926 | 0.771855245 | -22.827651   | 3.551440118 | 0.114277869 NA | NA             |             |
| ASV_16s_1927 | 1.024556534 | 0.113771211  | 3.550580366 | 3.029318295    | 0.882276861 NA |             |
| ASV_16s_1928 | 2.925779193 | -0.519792668 | 2.766496966 | 6.149265106    | 0.522432725    | 1           |
| ASV_16s_1929 | 3.430963884 | 1.261098939  | 3.546553822 | 2.908559836    | 0.893330332    | 1           |
| ASV_16s_1930 | 3.209756879 | 0.108866604  | 2.902004969 | 3.755614739    | 0.807456204    | 1           |
| ASV_16s_1931 | 2.623553248 | -9.569717589 | 3.549686354 | 1.837305907    | 0.96829384     | 1           |
| ASV_16s_1932 | 2.933950878 | -0.488937095 | 2.826742359 | 4.905668796    | 0.67147383     | 1           |
| ASV_16s_1933 | 2.776113592 | -1.380232111 | 2.453196416 | 4.987607073    | 0.661475677    | 1           |
| ASV_16s_1934 | 4.913472018 | -26.85240569 | 3.549041464 | 0.46696457 NA  | NA             |             |
| ASV_16s_1935 | 3.624905428 | -0.24468315  | 1.983710279 | 7.302189922    | 0.398108534    | 1           |
| ASV_16s_1936 | 2.521919725 | -1.378164631 | 3.309315351 | 2.548554282    | 0.923396716    | 1           |
| ASV_16s_1937 | 2.922768197 | -8.264619913 | 3.545167391 | 0.907337548    | 0.996188108    | 1           |
| ASV_16s_1938 | 3.200156623 | 1.015871177  | 1.847246523 | 13.89145691    | 0.05314592     | 0.333332311 |
| ASV_16s_1939 | 1.592364312 | -0.409031668 | 3.546674614 | 2.854961931    | 0.898087368 NA |             |
| ASV_16s_1940 | 2.605710832 | -22.90684729 | 3.550604766 | 2.398030474    | 0.934577789    | 1           |
| ASV_16s_1941 | 2.740681448 | 2.158550277  | 3.544282175 | 3.080908563    | 0.877417967    | 1           |
| ASV_16s_1942 | 2.993195849 | -1.172576494 | 3.376665415 | 3.909788361    | 0.790107477    | 1           |
| ASV_16s_1943 | 3.009606646 | -0.533169089 | 1.763368748 | 12.03022705    | 0.099569207    | 0.523289732 |
| ASV_16s_1944 | 3.413046178 | 0.32150857   | 3.549617047 | 4.139896844    | 0.763530449    | 1           |

|              |             |              |             |              |             |             |   |
|--------------|-------------|--------------|-------------|--------------|-------------|-------------|---|
| ASV_16s_1945 | 2.407435533 | -8.944847947 | 3.548428505 | 1.885674904  | NA          | NA          |   |
| ASV_16s_1946 | 2.399232197 | 1.131787869  | 2.895155863 | 2.468397279  | NA          | NA          |   |
| ASV_16s_1947 | 0.810921032 | -10.36831065 | 3.549640517 | 0.015573538  | NA          | NA          |   |
| ASV_16s_1948 | 2.925906747 | -1.285553065 | 2.236671643 | 4.220118196  | 0.754103768 |             | 1 |
| ASV_16s_1949 | 5.612297025 | 18.25550779  | 3.550586821 | 0.976825604  | NA          | NA          |   |
| ASV_16s_1950 | 0.85025629  | -21.8898321  | 3.550626906 | 0.011108681  | NA          | NA          |   |
| ASV_16s_1951 | 2.65947829  | 0.149075664  | 3.547678617 | 4.704544172  | 0.695967114 |             | 1 |
| ASV_16s_1952 | 3.075639029 | -0.799353407 | 3.193085454 | 3.983626911  | 0.781661331 |             | 1 |
| ASV_16s_1953 | 2.840879841 | -1.775130032 | 2.027601022 | 5.635049161  | 0.582948295 |             | 1 |
| ASV_16s_1954 | 3.32243562  | 0.23359886   | 3.066445222 | 4.261320874  | 0.749234334 |             | 1 |
| ASV_16s_1955 | 0.479561093 | -0.17033493  | 3.550561657 | 1.245639537  | 0.989837814 | NA          |   |
| ASV_16s_1956 | 2.923737031 | -1.931635426 | 2.005224618 | 5.45362865   | 0.604782869 |             | 1 |
| ASV_16s_1957 | 2.082309719 | -7.553541463 | 3.5498997   | 1.758528682  | NA          | NA          |   |
| ASV_16s_1958 | 0.455643494 | -22.53353524 | 3.551441932 | -0.208542514 | NA          | NA          |   |
| ASV_16s_1959 | 2.746115682 | -8.220366276 | 3.549233296 | 2.82710545   | 0.900522436 |             | 1 |
| ASV_16s_1960 | 2.612454859 | -5.228690275 | 3.552157344 | 0.206910939  | NA          | NA          |   |
| ASV_16s_1961 | 2.115707639 | -0.196240308 | 3.545910469 | 3.051293286  | NA          | NA          |   |
| ASV_16s_1962 | 2.626415573 | -0.953216256 | 3.546400795 | 2.022641201  | 0.958576598 |             | 1 |
| ASV_16s_1963 | 3.593405906 | -0.077473102 | 2.654341519 | 5.613810026  | 0.585494081 |             | 1 |
| ASV_16s_1964 | 3.746030623 | 0.861049379  | 3.549217006 | 3.432103445  | 0.842363824 |             | 1 |
| ASV_16s_1965 | 2.563674097 | 1.450606707  | 3.543324838 | 2.502886001  | 0.92687959  |             | 1 |
| ASV_16s_1966 | 3.059778883 | -0.712393745 | 2.704463069 | 6.399286164  | 0.493974844 |             | 1 |
| ASV_16s_1967 | 2.606685785 | 1.742833341  | 2.699607952 | 2.731248695  | 0.908701699 |             | 1 |
| ASV_16s_1968 | 1.673092274 | -29.18975494 | 3.551421433 | 0.345832153  | 0.999838349 | NA          |   |
| ASV_16s_1969 | 2.661318838 | 8.907923603  | 3.547112142 | 1.569290105  | NA          | NA          |   |
| ASV_16s_1970 | 2.877993467 | 1.604542634  | 2.147699181 | 5.123986252  | 0.644835588 |             | 1 |
| ASV_16s_1971 | 3.060975131 | -0.960087333 | 2.903383316 | 4.094735224  | 0.768803415 |             | 1 |
| ASV_16s_1972 | 3.1823341   | -2.425124765 | 3.139609646 | 3.132762113  | 0.872454969 |             | 1 |
| ASV_16s_1973 | 3.620658128 | -0.12691314  | 2.677420572 | 5.155104473  | NA          | NA          |   |
| ASV_16s_1974 | 2.645314966 | -5.085468281 | 3.549633594 | 1.564661427  | NA          | NA          |   |
| ASV_16s_1975 | 2.901021449 | 0.534880525  | 2.836747967 | 6.367635479  | 0.497536817 |             | 1 |
| ASV_16s_1976 | 3.313019198 | 1.059585626  | 3.548141735 | 3.061601328  | 0.8792457   |             | 1 |
| ASV_16s_1977 | 3.055016544 | -0.799514079 | 3.204129548 | 3.873362729  | 0.794242627 |             | 1 |
| ASV_16s_1978 | 3.200008683 | 0.722135841  | 3.549727821 | 2.812092678  | 0.901824041 |             | 1 |
| ASV_16s_1979 | 2.48228087  | 26.61412248  | 3.547200208 | -0.373152063 | NA          | NA          |   |
| ASV_16s_1980 | 3.341014341 | 0.547071234  | 2.773905175 | 7.614859683  | 0.367776085 |             | 1 |
| ASV_16s_1981 | 3.062546514 | -0.797298834 | 3.547638502 | 3.202902001  | 0.865619182 |             | 1 |
| ASV_16s_1982 | 2.936991509 | -0.95059363  | 2.749604885 | 4.448957458  | 0.726854622 |             | 1 |
| ASV_16s_1983 | 2.938587276 | -5.560450675 | 3.5493775   | 2.898301468  | 0.894248038 |             | 1 |
| ASV_16s_1984 | 2.96633596  | -18.87667604 | 3.551799395 | 0.6788169    | 0.998493256 |             | 1 |
| ASV_16s_1985 | 0.938179404 | 0.162661309  | 3.550576173 | 4.129531482  | 0.76474293  | NA          |   |
| ASV_16s_1986 | 2.566667379 | 1.224443206  | 3.311070398 | 4.533328626  | 0.716700317 |             | 1 |
| ASV_16s_1987 | 2.693223961 | 1.052011728  | 3.544913894 | 3.350440959  | 0.850803449 |             | 1 |
| ASV_16s_1988 | 2.811484241 | 1.438867552  | 3.545346821 | 3.821759438  | 0.800063199 |             | 1 |
| ASV_16s_1989 | 2.901914112 | -24.35691845 | 3.088953161 | 2.853135565  | 0.898247808 |             | 1 |
| ASV_16s_1990 | 2.893260284 | -0.157341639 | 1.81520518  | 8.4535637    | 0.294301324 |             | 1 |
| ASV_16s_1991 | 2.783950015 | -0.683258557 | 3.40845228  | 3.171200756  | 0.868725925 |             | 1 |
| ASV_16s_1992 | 2.680843878 | -0.511111631 | 1.976030953 | 10.82947324  | 0.146232219 | 0.676918169 |   |
| ASV_16s_1993 | 3.089803453 | -0.917832663 | 3.236596429 | 3.526659301  | 0.832393745 |             | 1 |
| ASV_16s_1994 | 2.506849193 | -1.464351237 | 2.913709201 | 3.239168846  | 0.862031    |             | 1 |
| ASV_16s_1995 | 4.799871256 | -25.10235396 | 3.549040847 | 0.453014117  | NA          | NA          |   |
| ASV_16s_1996 | 2.154446108 | 11.37524592  | 3.043804779 | 0.878059628  | NA          | NA          |   |
| ASV_16s_1997 | 3.056509959 | -0.799429813 | 3.200539153 | 3.92053768   | 0.788883123 |             | 1 |
| ASV_16s_1998 | 3.001886544 | -0.865304843 | 3.268213003 | 3.222824611  | 0.863652518 |             | 1 |
| ASV_16s_1999 | 2.942900381 | -0.797129293 | 3.547689582 | 3.198923178  | 0.866010643 |             | 1 |
| ASV_16s_2000 | 0.832755303 | -21.6817845  | 3.55062803  | -3.48E-04    | NA          | NA          |   |
| ASV_16s_2001 | 3.062711674 | -0.821752975 | 3.546781216 | 2.68334528   | 0.912670289 |             | 1 |
| ASV_16s_2002 | 3.000700607 | -0.651434958 | 2.352117774 | 5.53661897   | 0.594770682 |             | 1 |
| ASV_16s_2003 | 3.170439147 | 0.389342708  | 1.896268466 | 5.428701693  | 0.607797144 |             | 1 |
| ASV_16s_2004 | 2.270742887 | -2.892581151 | 2.925337767 | 3.509963346  | 0.834169052 |             | 1 |
| ASV_16s_2005 | 3.306743241 | 0.370892019  | 3.550399638 | 1.559284247  | 0.98018598  |             | 1 |
| ASV_16s_2006 | 3.174703112 | -3.309932653 | 2.739486515 | 2.852445931  | 0.898308361 |             | 1 |
| ASV_16s_2007 | 3.531515535 | 0.407035592  | 2.826123279 | 8.006468463  | 0.332023865 |             | 1 |
| ASV_16s_2008 | 3.30757133  | 0.368326258  | 3.547276231 | 2.125315295  | 0.952579853 |             | 1 |
| ASV_16s_2009 | 3.240677521 | 0.361096385  | 1.945468387 | 11.19166521  | 0.130474434 | 0.627557169 |   |
| ASV_16s_2010 | 3.208610535 | 0.93145618   | 3.549561347 | 1.917243621  | 0.964278308 |             | 1 |
| ASV_16s_2011 | 2.603589382 | -29.63308674 | 3.549322638 | 1.726532151  | 0.97341706  |             | 1 |

|              |             |              |             |              |             |             |   |
|--------------|-------------|--------------|-------------|--------------|-------------|-------------|---|
| ASV_16s_2012 | 3.255147169 | 3.807661561  | 1.827859743 | 7.501979984  | 0.378546159 |             | 1 |
| ASV_16s_2013 | 2.89554099  | -0.936028234 | 3.548466526 | 1.663184182  | NA          | NA          |   |
| ASV_16s_2014 | 1.79767677  | 15.1430339   | 3.551446379 | 1.226641873  | 0.990300482 | NA          |   |
| ASV_16s_2015 | 2.083113261 | 17.82984004  | 3.550738917 | 1.849226839  | NA          | NA          |   |
| ASV_16s_2016 | 2.682127565 | -10.18113055 | 3.548772287 | 2.298026743  | 0.941523252 |             | 1 |
| ASV_16s_2017 | 2.020024463 | 3.991426129  | 3.546127187 | 0.873983138  | NA          | NA          |   |
| ASV_16s_2018 | 3.36321493  | 0.343219214  | 3.549258571 | 3.619705407  | 0.82238859  |             | 1 |
| ASV_16s_2019 | 2.618637367 | 8.553392353  | 3.549608512 | 1.675230418  | 0.975616428 |             | 1 |
| ASV_16s_2020 | 2.073274778 | 20.40540068  | 3.296782254 | 0.616061378  | 0.998900879 |             | 1 |
| ASV_16s_2021 | 3.154482099 | 0.67870997   | 3.550578024 | 3.162069636  | 0.86961556  |             | 1 |
| ASV_16s_2022 | 1.755030326 | 17.06100069  | 3.551445392 | 0.58880004   | NA          | NA          |   |
| ASV_16s_2023 | 0.652314193 | -22.73597733 | 3.5514406   | 0.011145459  | NA          | NA          |   |
| ASV_16s_2024 | 2.991704502 | -0.819557543 | 3.547556448 | 2.634559525  | 0.916628484 |             | 1 |
| ASV_16s_2025 | 2.538096902 | -0.92607849  | 1.904292509 | 6.188324011  | 0.517940087 |             | 1 |
| ASV_16s_2026 | 2.422854892 | 0.767183045  | 3.547433581 | 3.952218642  | 0.78526417  |             | 1 |
| ASV_16s_2027 | 2.731658658 | -2.292213701 | 1.954052915 | 3.595150069  | 0.825046952 |             | 1 |
| ASV_16s_2028 | 3.035071942 | 2.798837269  | 3.546772118 | 2.275881909  | 0.943007915 |             | 1 |
| ASV_16s_2029 | 0.441527172 | -22.28563344 | 3.551442064 | -0.227799142 | NA          | NA          |   |
| ASV_16s_2030 | 3.587725308 | -1.506856509 | 2.220088271 | 3.799191947  | 0.802594329 |             | 1 |
| ASV_16s_2031 | 2.07007873  | 0.248883404  | 2.861310231 | 4.606790996  | 0.707822604 |             | 1 |
| ASV_16s_2032 | 0.74058836  | -5.343415732 | 3.551067075 | 0.413843742  | NA          | NA          |   |
| ASV_16s_2033 | 2.877142829 | -0.796706414 | 3.54776668  | 3.19354658   | 0.866538929 |             | 1 |
| ASV_16s_2034 | 1.706735013 | 13.82796235  | 3.551490024 | 1.531265135  | 0.98120748  | NA          |   |
| ASV_16s_2035 | 3.374859502 | 0.980079487  | 3.256313785 | 1.547810713  | 0.980608142 |             | 1 |
| ASV_16s_2036 | 2.358640966 | 1.679251883  | 2.285503463 | 6.309325979  | 0.504130595 |             | 1 |
| ASV_16s_2037 | 3.260850947 | -0.122938823 | 2.076485998 | 11.98496746  | 0.101054307 | 0.527771404 |   |
| ASV_16s_2038 | 0.374825873 | -0.059358648 | 3.55061242  | 1.291878249  | NA          | NA          |   |
| ASV_16s_2039 | 2.412018879 | 2.850028235  | 3.5446616   | 3.164824136  | NA          | NA          |   |
| ASV_16s_2040 | 2.274596472 | 0.778891459  | 3.550476223 | 1.657102246  | 0.976367473 |             | 1 |
| ASV_16s_2041 | 3.119743848 | 2.167694964  | 2.021107184 | 5.572163277  | 0.590494488 |             | 1 |
| ASV_16s_2042 | 3.404461562 | 3.274664436  | 3.548865805 | 2.758395503  | 0.906417203 |             | 1 |
| ASV_16s_2043 | 2.452928325 | -0.041731546 | 3.547675046 | 4.300028229  | 0.744643911 |             | 1 |
| ASV_16s_2044 | 3.798802981 | 0.206114076  | 2.823007982 | 5.487234864  | 0.600724032 |             | 1 |
| ASV_16s_2045 | 0.641923347 | -22.68181324 | 3.551440645 | 0.00130469   | NA          | NA          |   |
| ASV_16s_2046 | 0.761702171 | -13.83969321 | 3.552157344 | 0.117283723  | NA          | NA          |   |
| ASV_16s_2047 | 2.506317287 | -7.983169523 | 3.549316174 | 2.606365932  | 0.918876947 |             | 1 |
| ASV_16s_2048 | 2.509257568 | -9.761352337 | 3.548896848 | 2.328192593  | 0.93946955  |             | 1 |
| ASV_16s_2049 | 2.986375278 | -0.797330197 | 3.547640603 | 3.174010663  | 0.868451687 |             | 1 |
| ASV_16s_2050 | 3.228870148 | -0.044362068 | 2.570110409 | 8.121363387  | 0.322014029 |             | 1 |
| ASV_16s_2051 | 2.415460462 | -21.9468278  | 3.550606085 | 2.307773414  | 0.940863631 |             | 1 |
| ASV_16s_2052 | 2.618234745 | -1.61334698  | 3.283457692 | 2.807402999  | 0.902229084 |             | 1 |
| ASV_16s_2053 | 2.948921397 | -0.216719056 | 3.548232423 | 1.964492983  | NA          | NA          |   |
| ASV_16s_2054 | 2.786115006 | -1.240979838 | 3.364204425 | 2.064434599  | 0.95618806  |             | 1 |
| ASV_16s_2055 | 2.820434242 | 0.325644933  | 2.55150378  | 7.291879127  | 0.39913524  |             | 1 |
| ASV_16s_2056 | 1.872223741 | 0.869794325  | 3.54877134  | 4.323017125  | 0.741910675 | NA          |   |
| ASV_16s_2057 | 2.765313894 | -8.587396508 | 3.552157344 | 0.658014995  | NA          | NA          |   |
| ASV_16s_2058 | 3.125989771 | -0.095827446 | 3.549036062 | 2.075651686  | 0.955534714 |             | 1 |
| ASV_16s_2059 | 2.88175885  | -0.797343887 | 3.547641119 | 3.126394494  | 0.873068633 |             | 1 |
| ASV_16s_2060 | 2.894964911 | -0.823398874 | 2.90707282  | 4.09355936   | 0.768940362 |             | 1 |
| ASV_16s_2061 | 2.915105668 | -1.526562123 | 2.367726866 | 4.512577533  | 0.719202202 |             | 1 |
| ASV_16s_2062 | 3.082374984 | 0.96870389   | 3.548964512 | 2.336524034  | 0.938896013 |             | 1 |
| ASV_16s_2063 | 2.769403213 | 0.425086181  | 3.012893696 | 5.010349174  | 0.658700203 |             | 1 |
| ASV_16s_2064 | 2.226600224 | 2.948372058  | 3.544617737 | 2.986685027  | 0.886231236 |             | 1 |
| ASV_16s_2065 | 2.845731778 | 0.022379646  | 2.533547118 | 5.814229394  | 0.561600767 |             | 1 |
| ASV_16s_2066 | 2.37318238  | -24.82445201 | 3.551447276 | 1.839127648  | 0.968205301 |             | 1 |
| ASV_16s_2067 | 3.735343943 | 0.344940225  | 3.550727587 | 3.283184704  | 0.857628468 |             | 1 |
| ASV_16s_2068 | 2.769089112 | -0.228172571 | 1.851074941 | 9.784903995  | 0.201093982 | 0.847116199 |   |
| ASV_16s_2069 | 3.504085815 | 17.82244202  | 3.550335878 | 0.673434031  | 0.998531634 |             | 1 |
| ASV_16s_2070 | 2.345811873 | -8.030209275 | 3.549414203 | 2.287601874  | 0.942224599 |             | 1 |
| ASV_16s_2071 | 2.708932573 | 0.532301989  | 3.370498238 | 3.984704196  | 0.781537496 |             | 1 |
| ASV_16s_2072 | 2.921262579 | -0.799330876 | 3.190454648 | 3.916773107  | 0.789312118 |             | 1 |
| ASV_16s_2073 | 3.26505271  | 1.169813238  | 2.147454256 | 8.53346486   | 0.287907685 |             | 1 |
| ASV_16s_2074 | 2.404084051 | 17.40597421  | 3.551454404 | 1.21814463   | 0.990503103 |             | 1 |
| ASV_16s_2075 | 3.40599072  | 0.288103531  | 3.106972057 | 3.593392401  | 0.825236752 |             | 1 |
| ASV_16s_2076 | 4.19432579  | -0.935698938 | 3.548929737 | 2.78579776   | 0.904085514 |             | 1 |
| ASV_16s_2077 | 3.345503977 | 0.583846183  | 3.059172096 | 7.407485858  | 0.387719473 |             | 1 |
| ASV_16s_2078 | 2.356658559 | -7.983320745 | 3.549318392 | 2.490261519  | 0.927828595 |             | 1 |

|              |             |              |             |              |             |            |
|--------------|-------------|--------------|-------------|--------------|-------------|------------|
| ASV_16s_2079 | 2.792770194 | -0.881467577 | 2.579568257 | 6.107961246  | 0.527201444 | 1          |
| ASV_16s_2080 | 3.092497276 | -0.981235507 | 2.50680125  | 3.020623011  | 0.883087899 | 1          |
| ASV_16s_2081 | 2.294108802 | -1.741056678 | 2.584832813 | 2.214843458  | 0.946998681 | 1          |
| ASV_16s_2082 | 2.049836968 | -30          | 3.549949785 | 1.645120972  | 0.976856383 | 1          |
| ASV_16s_2083 | 0.796294913 | -21.80908196 | 3.550630448 | -0.02500693  | NA          | NA         |
| ASV_16s_2084 | 0.660527821 | -22.59520777 | 3.551440558 | 0.018804953  | 0.999999993 | NA         |
| ASV_16s_2085 | 2.992744364 | 0.312392603  | 2.367461149 | 9.581230103  | 0.213572388 | 0.88084966 |
| ASV_16s_2086 | 3.192691038 | -0.831079517 | 2.750670518 | 2.951678343  | 0.889436091 | 1          |
| ASV_16s_2087 | 2.518662544 | -5.076208528 | 3.550730112 | -0.21434705  | NA          | NA         |
| ASV_16s_2088 | 0.879625855 | -0.853171563 | 3.548769535 | 1.236183541  | 0.990069777 | NA         |
| ASV_16s_2089 | 2.446885425 | -23.29687137 | 3.550592761 | 0.593739783  | 0.999025749 | 1          |
| ASV_16s_2090 | 2.317179216 | -0.071715676 | 3.54696949  | 3.061606865  | 0.879245178 | 1          |
| ASV_16s_2091 | 3.005257538 | -0.924643073 | 2.674892891 | 3.06452244   | 0.878969883 | 1          |
| ASV_16s_2092 | 2.622908757 | 0.217483309  | 3.549567673 | 1.387393175  | 0.985954273 | 1          |
| ASV_16s_2093 | 1.560607031 | 0.345674288  | 3.05373109  | 3.704648288  | 0.813098017 | NA         |
| ASV_16s_2094 | 2.47793123  | 0.460224914  | 3.549492787 | 0.809821118  | 0.997342429 | 1          |
| ASV_16s_2095 | 3.16287378  | -24.33692585 | 3.550589544 | 0.74057598   | NA          | NA         |
| ASV_16s_2096 | 1.675237434 | 17.91463178  | 3.551442617 | 1.933467364  | 0.963430766 | NA         |
| ASV_16s_2097 | 0.798118829 | -23.99484547 | 3.549554349 | 0.340672044  | NA          | NA         |
| ASV_16s_2098 | 2.332148289 | 0.766882922  | 3.546321396 | 3.325533269  | 0.853344582 | 1          |
| ASV_16s_2099 | 2.801694219 | 1.058985296  | 2.311880514 | 4.607099458  | 0.707785265 | 1          |
| ASV_16s_2100 | 3.114110164 | 0.09179916   | 2.610462787 | 7.319415382  | 0.396397016 | 1          |
| ASV_16s_2101 | 0.42348965  | -22.01800119 | 3.551442259 | -0.253316914 | NA          | NA         |
| ASV_16s_2102 | 2.982709326 | -30          | 3.549892679 | 2.096833078  | 0.954286863 | 1          |
| ASV_16s_2103 | 2.684244181 | 4.7531903    | 3.12391708  | 1.61206105   | 0.978174667 | 1          |
| ASV_16s_2104 | 2.364514493 | 0.839664724  | 2.980644621 | 5.205503061  | 0.634900611 | 1          |
| ASV_16s_2105 | 2.291932335 | 11.42876133  | 3.545629682 | 0.712698865  | NA          | NA         |
| ASV_16s_2106 | 1.674410559 | 16.95883407  | 3.551445818 | 0.559910707  | NA          | NA         |
| ASV_16s_2107 | 3.035295577 | 0.694103906  | 3.550576714 | 2.258353753  | 0.944169207 | 1          |
| ASV_16s_2108 | 2.329258792 | 0.277899304  | 3.296066843 | 4.16430963   | 0.760669651 | 1          |
| ASV_16s_2109 | 2.594821678 | 0.166209528  | 2.959861853 | 5.658842584  | 0.580099965 | 1          |
| ASV_16s_2110 | 2.049383676 | 4.638312417  | 3.545374691 | 0.978434077  | NA          | NA         |
| ASV_16s_2111 | 2.330422065 | -21.80284011 | 3.550601142 | 2.167955322  | 0.949962317 | 1          |
| ASV_16s_2112 | 2.511087877 | 0.35414277   | 3.549768743 | 1.326717563  | 0.987710885 | 1          |
| ASV_16s_2113 | 2.501235647 | 1.936052009  | 3.451463015 | 3.071927454  | 0.878269548 | 1          |
| ASV_16s_2114 | 2.856174594 | -0.797451246 | 3.547620056 | 3.044890167  | 0.880818687 | 1          |
| ASV_16s_2115 | 2.782650465 | -0.024852188 | 2.452087948 | 7.972742965  | 0.335003545 | 1          |
| ASV_16s_2116 | 1.629573204 | -25.87501472 | 3.551565427 | 0.728410714  | 0.998107791 | NA         |
| ASV_16s_2117 | 0.759686653 | -22.71206823 | 3.550434349 | -0.129479196 | NA          | NA         |
| ASV_16s_2118 | 2.869463874 | -1.515303413 | 3.387095042 | 3.464656624  | 0.838954716 | 1          |
| ASV_16s_2119 | 2.775769183 | 1.409167956  | 3.547535742 | 2.798946638  | NA          | NA         |
| ASV_16s_2120 | 2.497914751 | -0.35866822  | 3.54658434  | 3.776291716  | 0.805153566 | 1          |
| ASV_16s_2121 | 2.564387923 | 0.178794353  | 3.54588025  | 3.853763166  | 0.796458639 | 1          |
| ASV_16s_2122 | 2.380233671 | 0.039215579  | 3.547726072 | 4.304798002  | 0.744077229 | 1          |
| ASV_16s_2123 | 2.658177798 | -1.223851095 | 2.654795284 | 3.703228835  | 0.81325444  | 1          |
| ASV_16s_2124 | 2.163487223 | 4.093449879  | 3.039375252 | 1.768498851  | 0.971536404 | 1          |
| ASV_16s_2125 | 3.424190437 | 0.007732373  | 2.693435109 | 4.941124886  | 0.667148021 | 1          |
| ASV_16s_2126 | 2.861472432 | -0.667539439 | 2.767361433 | 6.005238353  | 0.539137827 | 1          |
| ASV_16s_2127 | 2.844568548 | 0.363330558  | 3.550058466 | 1.895537939  | 0.965395054 | 1          |
| ASV_16s_2128 | 2.377487506 | -0.141680042 | 3.547655222 | 4.031632679  | 0.776126815 | 1          |
| ASV_16s_2129 | 0.670888845 | -0.134543407 | 3.550547848 | 1.788877491  | 0.970596666 | NA         |
| ASV_16s_2130 | 2.198675647 | -0.135149234 | 3.547732233 | 3.792052629  | NA          | NA         |
| ASV_16s_2131 | 2.861873749 | -0.797381197 | 3.547636524 | 3.10627053   | 0.875000324 | 1          |
| ASV_16s_2132 | 2.020445091 | 1.846703644  | 2.39297911  | 4.14410485   | 0.763037847 | 1          |
| ASV_16s_2133 | 3.065806652 | -0.175191694 | 3.549063301 | 2.875172023  | 0.896304655 | 1          |
| ASV_16s_2134 | 3.129068112 | 0.540583317  | 3.044913805 | 5.294892504  | 0.624024711 | 1          |
| ASV_16s_2135 | 2.305094192 | -8.015408686 | 3.549406332 | 2.274371517  | 0.943108466 | 1          |
| ASV_16s_2136 | 2.349467172 | 5.694970434  | 3.547824113 | 1.919252644  | NA          | NA         |
| ASV_16s_2137 | 3.310134169 | 0.243482465  | 3.1052924   | 3.813734444  | 0.800964289 | 1          |
| ASV_16s_2138 | 2.30010911  | 0.088286618  | 3.54777162  | 4.252551347  | 0.750272234 | 1          |
| ASV_16s_2139 | 2.351293867 | 1.369832465  | 3.546843265 | 3.674269059  | 0.816437228 | 1          |
| ASV_16s_2140 | 2.457371455 | 1.13777308   | 3.544494996 | 3.016674021  | 0.883455473 | 1          |
| ASV_16s_2141 | 1.774845609 | -0.159778916 | 3.340738089 | 2.199439502  | 0.947982129 | NA         |
| ASV_16s_2142 | 2.394069729 | 2.240260221  | 2.524778434 | 3.989564847  | 0.78097855  | 1          |
| ASV_16s_2143 | 3.292684816 | 2.240758816  | 3.057716585 | 3.441080004  | 0.841426258 | 1          |
| ASV_16s_2144 | 2.92366045  | 0.346117722  | 3.550611168 | 3.674620676  | 0.816398683 | 1          |
| ASV_16s_2145 | 2.231333534 | -22.62444534 | 3.550605324 | 2.186446277  | 0.948804205 | 1          |

|              |             |              |             |             |             |             |   |
|--------------|-------------|--------------|-------------|-------------|-------------|-------------|---|
| ASV_16s_2146 | 2.191974168 | -0.309144435 | 3.547678904 | 2.810774448 | NA          | NA          |   |
| ASV_16s_2147 | 2.672826382 | -2.102096511 | 2.485611752 | 3.399454843 | 0.845757557 |             | 1 |
| ASV_16s_2148 | 3.226199017 | 3.406444564  | 2.197258766 | 4.091936539 | 0.769129335 |             | 1 |
| ASV_16s_2149 | 2.936983885 | 1.544201573  | 3.548596833 | 1.985167577 | 0.960656741 |             | 1 |
| ASV_16s_2150 | 3.164282677 | 0.804867214  | 3.549361146 | 1.909126768 | 0.964698218 |             | 1 |
| ASV_16s_2151 | 3.270608509 | 1.231163938  | 2.294383899 | 8.917322541 | 0.258646605 | 0.999196018 |   |
| ASV_16s_2152 | 0.649985082 | -0.016956047 | 3.550567819 | 2.754749045 | 0.906725544 | NA          |   |
| ASV_16s_2153 | 2.68864357  | -29.2182469  | 2.831961775 | 1.54514089  | 0.980705607 |             | 1 |
| ASV_16s_2154 | 3.303073175 | 17.6948083   | 3.549738713 | 0.456741532 | 0.999589968 |             | 1 |
| ASV_16s_2155 | 2.797212751 | 4.551629408  | 2.731868101 | 0.803598633 | 0.997407055 |             | 1 |
| ASV_16s_2156 | 2.198713499 | 0.498978241  | 3.547717607 | 3.874993315 | NA          | NA          |   |
| ASV_16s_2157 | 2.358235117 | -0.373313744 | 3.547619366 | 3.974281861 | 0.782734835 |             | 1 |
| ASV_16s_2158 | 2.376511664 | 2.323060999  | 2.855027122 | 5.23500283  | 0.631308901 |             | 1 |
| ASV_16s_2159 | 2.384167992 | -0.835943658 | 3.268868788 | 2.905133131 | 0.893637261 |             | 1 |
| ASV_16s_2160 | 2.437487628 | 5.171169543  | 3.549822    | 1.557225215 | 0.980262137 |             | 1 |
| ASV_16s_2161 | 2.561830912 | -0.884082569 | 3.546699256 | 2.559551232 | 0.922546441 |             | 1 |
| ASV_16s_2162 | 2.54955137  | 3.204295455  | 2.326568317 | 7.103341917 | 0.418199915 |             | 1 |
| ASV_16s_2163 | 2.738353287 | 0.886038354  | 2.36024474  | 6.003193568 | 0.539376502 |             | 1 |
| ASV_16s_2164 | 2.992781889 | -0.706415431 | 3.268588668 | 1.794626965 | 0.970328399 |             | 1 |
| ASV_16s_2165 | 2.212903465 | -4.711512818 | 3.135962261 | 1.793912539 | NA          | NA          |   |
| ASV_16s_2166 | 1.515853863 | -15.82724619 | 3.552157344 | 0.539180564 | 0.999289996 | NA          |   |
| ASV_16s_2167 | 2.675662387 | -0.981153992 | 2.759648679 | 4.375615732 | 0.735638804 |             | 1 |
| ASV_16s_2168 | 2.93249619  | 0.608139812  | 2.547692252 | 5.498001837 | 0.599424898 |             | 1 |
| ASV_16s_2169 | 2.849750015 | 0.143055642  | 2.425062079 | 4.498458759 | 0.720902857 |             | 1 |
| ASV_16s_2170 | 2.109358027 | -0.042491115 | 2.908949826 | 3.277394994 | 0.858210504 |             | 1 |
| ASV_16s_2171 | 2.263020027 | 2.502322869  | 2.119496571 | 4.475776697 | 0.723632172 |             | 1 |
| ASV_16s_2172 | 1.618596873 | 16.92385049  | 3.551446105 | 0.539097149 | NA          | NA          |   |
| ASV_16s_2173 | 2.748378122 | -0.797221671 | 3.547658476 | 3.089907749 | 0.876562279 |             | 1 |
| ASV_16s_2174 | 2.67382437  | -0.321944344 | 3.065352968 | 2.804448392 | 0.902483891 |             | 1 |
| ASV_16s_2175 | 3.615783889 | -8.837643594 | 3.552157344 | 0.767262981 | NA          | NA          |   |
| ASV_16s_2176 | 2.667417559 | -1.603537651 | 2.246959991 | 6.986043296 | 0.430334474 |             | 1 |
| ASV_16s_2177 | 2.724983738 | -0.799031134 | 3.183911085 | 3.894407732 | 0.791856148 |             | 1 |
| ASV_16s_2178 | 1.297957525 | 0.618363585  | 2.34613996  | 2.501854386 | 0.926957363 | NA          |   |
| ASV_16s_2179 | 3.271821027 | 8.000792712  | 3.550154577 | 1.775785825 | 0.971202365 |             | 1 |
| ASV_16s_2180 | 2.701616734 | -0.909330958 | 2.934620503 | 3.818215613 | 0.800461257 |             | 1 |
| ASV_16s_2181 | 2.490373419 | 1.685847568  | 1.755900241 | 7.666860822 | 0.36288399  |             | 1 |
| ASV_16s_2182 | 3.009513189 | 3.417442424  | 2.884549151 | 3.037918307 | 0.88147245  |             | 1 |
| ASV_16s_2183 | 2.993835017 | 0.808426647  | 3.549223473 | 3.248714564 | 0.861080621 |             | 1 |
| ASV_16s_2184 | 2.154544013 | 0.124761537  | 3.547854882 | 4.09562684  | NA          | NA          |   |
| ASV_16s_2185 | 2.769834523 | -0.786174048 | 2.892197854 | 4.635328213 | 0.704366138 |             | 1 |
| ASV_16s_2186 | 2.3885401   | 3.870775948  | 3.54304225  | 2.523532039 | 0.925314679 |             | 1 |
| ASV_16s_2187 | 2.318266937 | -1.522967687 | 3.544517881 | 2.306699557 | 0.940936491 |             | 1 |
| ASV_16s_2188 | 0.712238105 | 0.295920317  | 3.55104398  | 0.809021342 | NA          | NA          |   |
| ASV_16s_2189 | 2.833413762 | 0.372841032  | 3.550391087 | 1.423493215 | 0.984840799 |             | 1 |
| ASV_16s_2190 | 2.861213146 | 0.4160148    | 2.927338097 | 6.378528661 | 0.496309519 |             | 1 |
| ASV_16s_2191 | 2.711004925 | -0.799074982 | 3.178111985 | 3.903058083 | 0.790873129 |             | 1 |
| ASV_16s_2192 | 2.466963259 | -1.217662997 | 2.959811958 | 2.880981365 | 0.895789741 |             | 1 |
| ASV_16s_2193 | 2.258096574 | 0.210141111  | 3.547733603 | 4.42240966  | 0.730039191 |             | 1 |
| ASV_16s_2194 | 2.753617111 | -0.805194284 | 2.266592217 | 6.54974676  | 0.477213169 |             | 1 |
| ASV_16s_2195 | 2.443693209 | -9.20816142  | 3.548882241 | 1.448940941 | 0.984024872 |             | 1 |
| ASV_16s_2196 | 1.86206556  | 2.035112375  | 3.546757922 | 1.935307145 | 0.963333961 | NA          |   |
| ASV_16s_2197 | 2.311117825 | 2.029055462  | 3.545772309 | 3.25252896  | 0.860700171 |             | 1 |
| ASV_16s_2198 | 2.547527611 | -0.038265768 | 2.840130837 | 5.637316197 | 0.58267674  |             | 1 |
| ASV_16s_2199 | 2.225361306 | -1.370650225 | 3.546814755 | 2.077042043 | 0.955453371 |             | 1 |
| ASV_16s_2200 | 3.325487273 | -9.398282357 | 3.550051555 | 4.168484276 | 0.760179738 |             | 1 |
| ASV_16s_2201 | 2.348700658 | 0.172429263  | 3.327436977 | 4.051470379 | 0.773830309 |             | 1 |
| ASV_16s_2202 | 2.227027519 | 1.268110485  | 3.546027614 | 3.425192015 | 0.843084387 |             | 1 |
| ASV_16s_2203 | 3.020629185 | 5.028355466  | 1.736228456 | 3.277107444 | 0.858239388 |             | 1 |
| ASV_16s_2204 | 0.707992059 | -13.52782608 | 3.552157344 | 0.07247031  | 0.999999243 | NA          |   |
| ASV_16s_2205 | 2.254669553 | 0.003056667  | 3.547825501 | 4.017117085 | 0.777803754 |             | 1 |
| ASV_16s_2206 | 2.487846694 | 3.246764787  | 2.626885207 | 4.789128853 | 0.685678793 |             | 1 |
| ASV_16s_2207 | 3.17817424  | 2.989166248  | 2.295652072 | 2.944676109 | 0.890072522 |             | 1 |
| ASV_16s_2208 | 2.337594177 | -1.065320052 | 3.545824127 | 3.079796969 | NA          | NA          |   |
| ASV_16s_2209 | 1.791902354 | -10.89421738 | 3.547257847 | 0.955305568 | NA          | NA          |   |
| ASV_16s_2210 | 3.642150496 | 0.841198842  | 3.549228912 | 3.875521987 | 0.793998103 |             | 1 |
| ASV_16s_2211 | 3.244639622 | 0.34455682   | 3.547820525 | 3.23590226  | NA          | NA          |   |
| ASV_16s_2212 | 2.196615016 | -22.22780602 | 3.550605663 | 2.16647433  | 0.950054473 |             | 1 |



|              |             |              |             |              |             |    |   |
|--------------|-------------|--------------|-------------|--------------|-------------|----|---|
| ASV_16s_2213 | 0.767383239 | 0.102764743  | 3.550586291 | 2.739570575  | 0.908004095 | NA |   |
| ASV_16s_2214 | 0.400746687 | -21.73792634 | 3.55144252  | -0.287077916 | NA          | NA |   |
| ASV_16s_2215 | 1.351285989 | -7.277386113 | 3.552157344 | 0.468717045  | NA          | NA |   |
| ASV_16s_2216 | 2.153872244 | 0.588971533  | 3.392148396 | 3.162241754  | 0.869598812 |    | 1 |
| ASV_16s_2217 | 1.616966608 | 18.25338178  | 3.551441786 | 0.497510178  | NA          | NA |   |
| ASV_16s_2218 | 0.663821543 | -22.64579851 | 3.551440543 | 0.021839145  | NA          | NA |   |
| ASV_16s_2219 | 0.588814581 | -22.52470363 | 3.551440932 | -0.051613771 | NA          | NA |   |
| ASV_16s_2220 | 0.399962447 | -22.26720758 | 3.55144254  | -0.288276101 | NA          | NA |   |
| ASV_16s_2221 | 2.114204398 | 0.623372699  | 3.548460796 | 3.6962383    | NA          | NA |   |
| ASV_16s_2222 | 2.271846089 | 2.157207674  | 3.546009866 | 3.473724273  | 0.838000694 |    | 1 |
| ASV_16s_2223 | 2.282992168 | -1.356125022 | 2.977299413 | 2.757178649  | 0.90652015  |    | 1 |
| ASV_16s_2224 | 0.769058758 | -0.136295254 | 3.54959522  | 2.456706455  | NA          | NA |   |
| ASV_16s_2225 | 2.112835524 | -23.26279555 | 3.550606913 | 2.12386071   | NA          | NA |   |
| ASV_16s_2226 | 0.587660043 | -22.65696833 | 3.551440936 | -0.052816059 | NA          | NA |   |
| ASV_16s_2227 | 2.290516928 | 0.032494174  | 3.547697055 | 4.348497345  | 0.73887549  |    | 1 |
| ASV_16s_2228 | 2.316153246 | 0.537476108  | 3.047042429 | 3.589186133  | 0.825690697 |    | 1 |
| ASV_16s_2229 | 2.409570765 | 0.105171133  | 2.458166613 | 6.656008005  | 0.465552553 |    | 1 |
| ASV_16s_2230 | 3.156220144 | 3.644112953  | 3.545593743 | 0.764670464  | NA          | NA |   |
| ASV_16s_2231 | 0.893785311 | 0.120382743  | 3.548609579 | 2.66376611   | NA          | NA |   |
| ASV_16s_2232 | 2.187594205 | -1.691314111 | 3.546609975 | 1.923294887  | NA          | NA |   |
| ASV_16s_2233 | 0.597836198 | -22.0664204  | 3.551441319 | 0.536139535  | NA          | NA |   |
| ASV_16s_2234 | 2.448109313 | 0.357378273  | 2.103891441 | 7.741203755  | 0.355966584 |    | 1 |
| ASV_16s_2235 | 1.992415155 | -1.655089745 | 3.545136174 | 2.602706227  | 0.919166697 | NA |   |
| ASV_16s_2236 | 2.956186954 | -2.97599527  | 3.544656169 | 1.560113901  | 0.980155245 |    | 1 |
| ASV_16s_2237 | 2.092320094 | -22.49633355 | 3.55060633  | 2.099006126  | NA          | NA |   |
| ASV_16s_2238 | 2.408839064 | -0.231831627 | 3.546809737 | 3.433714102  | 0.842195738 |    | 1 |
| ASV_16s_2239 | 2.131791915 | 0.048603162  | 3.547739788 | 4.208113427  | NA          | NA |   |
| ASV_16s_2240 | 2.760752506 | -0.998081423 | 3.54759076  | 2.895773502  | 0.894473665 |    | 1 |
| ASV_16s_2241 | 2.733455638 | -1.223902401 | 2.670769998 | 3.346451772  | 0.851211492 |    | 1 |
| ASV_16s_2242 | 2.236565367 | 0.067426403  | 3.547990536 | 3.912412753  | 0.789808726 |    | 1 |
| ASV_16s_2243 | 1.516708776 | -0.439263657 | 3.550338573 | 3.202391592  | 0.865669423 | NA |   |
| ASV_16s_2244 | 0.914024206 | 0.013864321  | 3.550774271 | 1.874859395  | NA          | NA |   |
| ASV_16s_2245 | 2.187110265 | 0.048657066  | 3.547944702 | 3.913411481  | 0.789695006 |    | 1 |
| ASV_16s_2246 | 2.174267057 | 0.314534112  | 3.54769568  | 4.046967332  | 0.774352076 |    | 1 |
| ASV_16s_2247 | 2.40285168  | -0.042682225 | 2.689545221 | 6.268492749  | 0.508772005 |    | 1 |
| ASV_16s_2248 | 2.639287306 | -0.797282215 | 3.547654962 | 3.017806552  | 0.883350105 |    | 1 |
| ASV_16s_2249 | 2.459298867 | 0.268212818  | 3.549433765 | 1.832364762  | 0.968533287 |    | 1 |
| ASV_16s_2250 | 3.360304344 | 10.91884973  | 3.548196156 | 1.834904575  | 0.968410336 |    | 1 |
| ASV_16s_2251 | 0.735041458 | -21.36117699 | 3.550635113 | -0.069087562 | NA          | NA |   |
| ASV_16s_2252 | 2.66940279  | 0.439993603  | 3.298804546 | 3.406904002  | 0.844985505 |    | 1 |
| ASV_16s_2253 | 2.681543388 | 0.443691726  | 3.549348098 | 2.316491474  | 0.940270437 |    | 1 |
| ASV_16s_2254 | 2.896255739 | 1.046021018  | 3.455231181 | 4.004371897  | 0.779273713 |    | 1 |
| ASV_16s_2255 | 2.259476932 | -0.336318958 | 3.547711193 | 3.952514739  | 0.785230274 |    | 1 |
| ASV_16s_2256 | 2.650137757 | -0.797687839 | 3.547708488 | 3.099975171  | 0.875602193 |    | 1 |
| ASV_16s_2257 | 2.294969314 | -1.48585667  | 3.05397809  | 3.185618536  | 0.867316447 |    | 1 |
| ASV_16s_2258 | 2.271019381 | -0.038303244 | 3.544991541 | 2.806663986  | 0.902292845 |    | 1 |
| ASV_16s_2259 | 2.553769732 | -2.101854564 | 2.438038288 | 3.299829217  | 0.855950304 |    | 1 |
| ASV_16s_2260 | 0.540629422 | 18.40138035  | 3.548801168 | -0.514408058 | 1           | NA |   |
| ASV_16s_2261 | 2.165226147 | 0.890726348  | 3.547383385 | 3.682838433  | 0.815497131 |    | 1 |
| ASV_16s_2262 | 2.353438282 | 1.678914096  | 3.019680435 | 4.368558579  | 0.736481718 |    | 1 |
| ASV_16s_2263 | 2.235676163 | 3.304969674  | 2.878616753 | 4.332357555  | 0.740798739 |    | 1 |
| ASV_16s_2264 | 2.70895672  | 0.659957425  | 3.549427911 | 3.262575454  | 0.859696266 |    | 1 |
| ASV_16s_2265 | 2.927439062 | -8.793846206 | 3.550068016 | 3.599728902  | 0.824552205 |    | 1 |
| ASV_16s_2266 | 2.286926012 | 0.278145177  | 3.548802178 | 3.46656899   | 0.838753672 |    | 1 |
| ASV_16s_2267 | 2.152572695 | 0.545046418  | 3.547758897 | 3.726979458  | 0.810632063 |    | 1 |
| ASV_16s_2268 | 2.861699371 | 0.213051088  | 3.243901359 | 4.956759041  | 0.665240257 |    | 1 |
| ASV_16s_2269 | 3.035916675 | -7.750448676 | 2.568167903 | 5.263061298  | 0.627894876 |    | 1 |
| ASV_16s_2270 | 1.428813462 | -7.283885773 | 3.552157344 | 0.502924223  | 0.999435703 | NA |   |
| ASV_16s_2271 | 2.115261209 | -22.47603786 | 3.550604072 | 2.067599715  | 0.956004231 |    | 1 |
| ASV_16s_2272 | 2.256053538 | 2.61940887   | 2.756864335 | 4.668120058  | 0.700389571 |    | 1 |
| ASV_16s_2273 | 2.22462853  | -25.99116713 | 3.550776737 | 1.950843398  | 0.962510856 |    | 1 |
| ASV_16s_2274 | 2.986416851 | -0.090946474 | 2.746672036 | 6.56506128   | 0.475523391 |    | 1 |
| ASV_16s_2275 | 2.4155496   | -0.263789183 | 3.54498293  | 2.762569459  | 0.906063696 |    | 1 |
| ASV_16s_2276 | 1.392938863 | 0.817874301  | 3.549086316 | 3.338196068  | NA          | NA |   |
| ASV_16s_2277 | 2.675870854 | 1.03444672   | 3.546304444 | 3.071183513  | NA          | NA |   |
| ASV_16s_2278 | 0.747609433 | -23.46422953 | 3.551441165 | 1.110916046  | NA          | NA |   |
| ASV_16s_2279 | 2.653977796 | -0.92390007  | 2.924029013 | 4.036784827  | 0.775530899 |    | 1 |

|              |             |              |             |              |             |    |   |
|--------------|-------------|--------------|-------------|--------------|-------------|----|---|
| ASV_16s_2280 | 1.808597252 | 0.205876622  | 2.852766339 | 1.745772329  | 0.972563966 | NA |   |
| ASV_16s_2281 | 1.743614678 | -0.209370054 | 3.545307979 | 0.562222264  | NA          | NA |   |
| ASV_16s_2282 | 2.201475275 | -1.094146401 | 3.269152899 | 2.423457049  | 0.932749705 |    | 1 |
| ASV_16s_2283 | 1.23912372  | 2.008137095  | 3.548458305 | 1.281211606  | NA          | NA |   |
| ASV_16s_2284 | 0.882655846 | 0.27784102   | 3.550586416 | 4.028381233  | 0.7765027   | NA |   |
| ASV_16s_2285 | 0.687080993 | -22.6834302  | 3.551440439 | 0.042935637  | NA          | NA |   |
| ASV_16s_2286 | 2.237049632 | -0.760517673 | 2.988205163 | 4.823302345  | 0.681516262 |    | 1 |
| ASV_16s_2287 | 2.442390421 | 1.158345814  | 3.401299759 | 3.509666632  | 0.834200545 |    | 1 |
| ASV_16s_2288 | 2.537681464 | -0.86337149  | 3.546828936 | 2.579757643  | 0.920972457 |    | 1 |
| ASV_16s_2289 | 2.75286468  | 0.459311366  | 3.546343018 | 2.969516521  | 0.887807804 |    | 1 |
| ASV_16s_2290 | 1.631024364 | -28.22047244 | 3.549670074 | 0.566662865  | 0.999163937 | NA |   |
| ASV_16s_2291 | 2.026400304 | 2.142567641  | 2.372784278 | 2.356119719  | 0.937536291 |    | 1 |
| ASV_16s_2292 | 2.139452406 | -4.402356208 | 3.547775271 | 1.489125371  | 0.982683752 |    | 1 |
| ASV_16s_2293 | 2.110945521 | 1.546890466  | 3.546856252 | 3.449483816  | NA          | NA |   |
| ASV_16s_2294 | 2.244062004 | 2.38745705   | 3.039731895 | 4.300032284  | 0.74464343  |    | 1 |
| ASV_16s_2295 | 2.294740045 | 2.250614381  | 3.545296945 | 3.305757162  | 0.85535088  |    | 1 |
| ASV_16s_2296 | 2.322346825 | 1.297113527  | 2.220679115 | 4.944164157  | 0.666777165 |    | 1 |
| ASV_16s_2297 | 2.628066242 | 1.589754444  | 2.704777331 | 5.59628326   | 0.587597122 |    | 1 |
| ASV_16s_2298 | 3.043034312 | 16.27972018  | 3.550637344 | 2.448928635  | NA          | NA |   |
| ASV_16s_2299 | 0.726195483 | -23.05392494 | 3.550142009 | -0.231204674 | NA          | NA |   |
| ASV_16s_2300 | 2.265477348 | 0.896994476  | 3.010416046 | 4.962615457  | 0.664525589 |    | 1 |
| ASV_16s_2301 | 2.707353792 | 0.420806804  | 3.125135036 | 5.577160764  | 0.589893875 |    | 1 |
| ASV_16s_2302 | 0.717540471 | -21.28656552 | 3.550636589 | -0.08235665  | NA          | NA |   |
| ASV_16s_2303 | 0.690331153 | 0.219963335  | 3.550618367 | 1.40526505   | 0.985409455 | NA |   |
| ASV_16s_2304 | 2.635507862 | 0.950844196  | 2.651671014 | 6.64861272   | 0.466359183 |    | 1 |
| ASV_16s_2305 | 1.773687765 | 2.159606663  | 3.324105719 | 3.344420155  | 0.851419146 | NA |   |
| ASV_16s_2306 | 2.528981265 | -0.87548087  | 2.608125919 | 4.890492901  | 0.673324942 |    | 1 |
| ASV_16s_2307 | 1.488204455 | -21.32489007 | 3.551091881 | 0.592663193  | NA          | NA |   |
| ASV_16s_2308 | 1.795972633 | 10.63510531  | 3.551470537 | 1.250127559  | NA          | NA |   |
| ASV_16s_2309 | 2.920546731 | 0.640297435  | 3.435412598 | 3.514799275  | 0.833655483 |    | 1 |
| ASV_16s_2310 | 2.19542969  | 0.38680714   | 3.545372423 | 2.583550786  | 0.920675315 |    | 1 |
| ASV_16s_2311 | 2.371213702 | 1.045294034  | 3.546414697 | 3.920006085  | 0.788943715 |    | 1 |
| ASV_16s_2312 | 2.485464368 | 3.073225615  | 2.063016923 | 4.111761378  | 0.766818486 |    | 1 |
| ASV_16s_2313 | 1.85574356  | 0.859723849  | 2.667406296 | 3.378925082  | 0.8478783   | NA |   |
| ASV_16s_2314 | 3.72434904  | -1.557818621 | 3.547696134 | 1.249066864  | NA          | NA |   |
| ASV_16s_2315 | 3.073495298 | 17.42748892  | 3.551442102 | 0.93271463   | NA          | NA |   |
| ASV_16s_2316 | 2.618743934 | -0.801624214 | 2.905228796 | 4.535733523  | 0.716410192 |    | 1 |
| ASV_16s_2317 | 1.242124473 | -0.464881255 | 3.548204027 | 2.322767405  | NA          | NA |   |
| ASV_16s_2318 | 2.60878088  | 0.236387211  | 3.3045656   | 4.686459404  | 0.698163562 |    | 1 |
| ASV_16s_2319 | 4.237615608 | -2.379915263 | 3.41638037  | 2.565925173  | 0.922051565 |    | 1 |
| ASV_16s_2320 | 2.184499464 | 0.097242798  | 3.547880722 | 4.046664945  | 0.774387104 |    | 1 |
| ASV_16s_2321 | 2.204797615 | 0.18114777   | 3.546798693 | 3.424533422  | 0.843152991 |    | 1 |
| ASV_16s_2322 | 2.333856408 | -0.338880295 | 3.546687639 | 3.675563838  | 0.816295278 |    | 1 |
| ASV_16s_2323 | 3.133296125 | 0.465851297  | 3.185910933 | 4.924307459  | 0.669199974 |    | 1 |
| ASV_16s_2324 | 2.235944923 | 2.115096547  | 2.44466187  | 5.829858359  | 0.559750661 |    | 1 |
| ASV_16s_2325 | 0.382709165 | -0.170278455 | 3.550575739 | 1.131124821  | NA          | NA |   |
| ASV_16s_2326 | 2.177496923 | 0.619826501  | 3.547461803 | 3.829027236  | 0.799246169 |    | 1 |
| ASV_16s_2327 | 2.295314079 | -0.449745792 | 3.546432732 | 3.003019511  | 0.884722762 |    | 1 |
| ASV_16s_2328 | 2.412248917 | 0.967981417  | 2.551873043 | 6.687841279  | 0.462088878 |    | 1 |
| ASV_16s_2329 | 2.268298867 | 0.406156184  | 3.000291428 | 4.944761498  | 0.666704276 |    | 1 |
| ASV_16s_2330 | 2.663878846 | -1.018195957 | 2.643582362 | 4.111539451  | 0.766844382 |    | 1 |
| ASV_16s_2331 | 3.529501995 | 0.201374496  | 3.549302539 | 1.488467691  | 0.982706224 |    | 1 |
| ASV_16s_2332 | 2.325886509 | 1.376376055  | 2.681001748 | 6.318922446  | 0.503042621 |    | 1 |
| ASV_16s_2333 | 2.874820139 | 0.343327102  | 3.549302107 | 3.426186047  | 0.842980823 |    | 1 |
| ASV_16s_2334 | 2.071546009 | 0.731425748  | 3.54798205  | 3.745775879  | NA          | NA |   |
| ASV_16s_2335 | 2.571867968 | -0.797009479 | 3.547721412 | 3.075499278  | 0.877931157 |    | 1 |
| ASV_16s_2336 | 2.761742511 | -0.927328994 | 2.392967854 | 3.908913263  | 0.790207071 |    | 1 |
| ASV_16s_2337 | 1.98706775  | 2.005869056  | 1.959303625 | 6.271316082  | 0.508450461 | NA |   |
| ASV_16s_2338 | 2.161130127 | -0.651972266 | 3.011025596 | 4.38292378   | 0.734765474 |    | 1 |
| ASV_16s_2339 | 2.414454334 | -3.11020901  | 3.544659959 | 0.654228554  | 0.998663239 |    | 1 |
| ASV_16s_2340 | 1.503868743 | 16.93359002  | 3.551446716 | 0.493980341  | NA          | NA |   |
| ASV_16s_2341 | 0.705873146 | -0.684094273 | 3.549366449 | 1.101789317  | NA          | NA |   |
| ASV_16s_2342 | 2.265788245 | 0.136134882  | 3.5465373   | 3.250411584  | 0.860911408 |    | 1 |
| ASV_16s_2343 | 2.008299773 | -0.342213214 | 3.547709877 | 2.339354472  | NA          | NA |   |
| ASV_16s_2344 | 2.906751857 | 0.015745972  | 3.549041255 | 3.799071384  | 0.802607827 |    | 1 |
| ASV_16s_2345 | 0.704414731 | -0.684088388 | 3.549367757 | 1.101122271  | NA          | NA |   |
| ASV_16s_2346 | 2.382256116 | -0.034921678 | 2.983706932 | 5.450888225  | 0.605114103 |    | 1 |

|              |             |              |             |             |             |             |   |
|--------------|-------------|--------------|-------------|-------------|-------------|-------------|---|
| ASV_16s_2347 | 1.991363488 | 1.530602113  | 3.547024547 | 3.400713195 | NA          | NA          |   |
| ASV_16s_2348 | 2.494483278 | -0.816966009 | 2.739146921 | 5.092723413 | 0.64864873  |             | 1 |
| ASV_16s_2349 | 2.467229208 | -0.796480552 | 3.547820719 | 3.064609576 | 0.878961652 |             | 1 |
| ASV_16s_2350 | 2.238480475 | 4.120370113  | 3.066954281 | 0.985571116 | 0.995057948 |             | 1 |
| ASV_16s_2351 | 2.521972724 | 0.92646584   | 2.216798467 | 7.602270218 | 0.368967064 |             | 1 |
| ASV_16s_2352 | 3.048419056 | 0.087120217  | 3.54844798  | 2.713595165 | 0.910173577 |             | 1 |
| ASV_16s_2353 | 2.82189469  | 0.761408277  | 3.549381395 | 2.860845597 | 0.897569762 |             | 1 |
| ASV_16s_2354 | 2.346390345 | 1.999738274  | 3.545625275 | 3.359166972 | 0.849909494 |             | 1 |
| ASV_16s_2355 | 3.808696253 | 0.428814564  | 3.549067968 | 2.263631557 | NA          | NA          |   |
| ASV_16s_2356 | 0.698792558 | -0.66924723  | 3.54931201  | 1.352691359 | NA          | NA          |   |
| ASV_16s_2357 | 2.160063946 | 0.017342948  | 3.548010051 | 3.794361906 | 0.803134894 |             | 1 |
| ASV_16s_2358 | 2.044894786 | 0.090126066  | 3.547964561 | 3.887863948 | 0.792598977 |             | 1 |
| ASV_16s_2359 | 2.183168352 | 1.933058493  | 3.54626666  | 3.442482823 | 0.841279566 |             | 1 |
| ASV_16s_2360 | 2.540574335 | 0.154395043  | 1.827401064 | 14.76512777 | 0.039130786 | 0.262425576 |   |
| ASV_16s_2361 | 2.245663293 | -0.679401746 | 3.285162945 | 4.259047488 | 0.749503472 |             | 1 |
| ASV_16s_2362 | 2.009727313 | -0.396168026 | 3.143143649 | 2.645042653 | 0.915785126 |             | 1 |
| ASV_16s_2363 | 2.579373848 | -1.623566686 | 2.397789224 | 6.760778459 | 0.454205397 |             | 1 |
| ASV_16s_2364 | 2.451576172 | 0.737504621  | 3.549062992 | 3.375655347 | NA          | NA          |   |
| ASV_16s_2365 | 2.092559431 | 0.569840803  | 3.545263614 | 1.939440067 | 0.963115982 |             | 1 |
| ASV_16s_2366 | 2.720266123 | 0.777216169  | 2.677682767 | 7.164794652 | 0.411925719 |             | 1 |
| ASV_16s_2367 | 0.374866764 | -0.170273366 | 3.550577197 | 1.120622474 | NA          | NA          |   |
| ASV_16s_2368 | 2.307310449 | -26.19290533 | 3.551470723 | 1.514311821 | 0.981810045 |             | 1 |
| ASV_16s_2369 | 1.968115546 | -0.278209995 | 3.549022848 | 3.347059811 | NA          | NA          |   |
| ASV_16s_2370 | 2.152693047 | 0.099460401  | 3.54780068  | 4.158057301 | 0.761403004 |             | 1 |
| ASV_16s_2371 | 2.140699488 | 1.142435147  | 3.292394218 | 4.272714955 | 0.747884632 |             | 1 |
| ASV_16s_2372 | 2.284283398 | -2.529431808 | 2.521605224 | 2.839812386 | 0.89941486  |             | 1 |
| ASV_16s_2373 | 2.459377157 | -21.06587082 | 3.55021323  | 1.416662035 | 0.985055448 |             | 1 |
| ASV_16s_2374 | 2.498444242 | -2.139943926 | 1.877577886 | 5.887473727 | 0.552948345 |             | 1 |
| ASV_16s_2375 | 3.055069568 | -2.171388214 | 3.544141369 | 3.290219921 | 0.856920035 |             | 1 |
| ASV_16s_2376 | 1.256087759 | -7.214199853 | 3.552157344 | 0.423893265 | NA          | NA          |   |
| ASV_16s_2377 | 0.880179191 | 13.82652062  | 3.55156209  | 0.618386983 | NA          | NA          |   |
| ASV_16s_2378 | 2.517854003 | -0.799113517 | 3.174954718 | 3.814879889 | 0.800835741 |             | 1 |
| ASV_16s_2379 | 2.216985627 | -2.887181964 | 3.544993223 | 0.648407136 | NA          | NA          |   |
| ASV_16s_2380 | 2.078086896 | -0.311581525 | 2.722784221 | 5.548530866 | 0.593336767 |             | 1 |
| ASV_16s_2381 | 2.389631553 | 2.555075581  | 1.786818552 | 8.579099429 | 0.284303121 |             | 1 |
| ASV_16s_2382 | 2.045218247 | 0.550837882  | 3.547319249 | 3.815585576 | 0.800756533 |             | 1 |
| ASV_16s_2383 | 2.151406234 | 2.217498812  | 3.040914747 | 4.257922845 | 0.749636595 |             | 1 |
| ASV_16s_2384 | 2.087468039 | -0.112177729 | 3.041234074 | 4.609207443 | 0.707530079 |             | 1 |
| ASV_16s_2385 | 2.334494064 | 0.075874325  | 3.546601249 | 4.11334362  | 0.76663384  |             | 1 |
| ASV_16s_2386 | 2.22833514  | -8.897012687 | 3.546290809 | 1.205751108 | NA          | NA          |   |
| ASV_16s_2387 | 2.131511655 | 0.010081577  | 3.547566896 | 2.958064474 | 0.888854309 |             | 1 |
| ASV_16s_2388 | 1.781032064 | 2.435152472  | 2.910742094 | 4.260788017 | 0.749297422 | NA          |   |
| ASV_16s_2389 | 2.414076432 | -7.925681555 | 3.548970561 | 2.128884728 | 0.952363584 |             | 1 |
| ASV_16s_2390 | 2.33005143  | 1.439141282  | 3.25257524  | 2.726890151 | 0.909066106 |             | 1 |
| ASV_16s_2391 | 1.408715454 | 0.052642513  | 3.55026446  | 3.293848543 | 0.856554132 | NA          |   |
| ASV_16s_2392 | 2.857167434 | 2.531454533  | 3.547566408 | 1.009748698 | 0.99466974  |             | 1 |
| ASV_16s_2393 | 1.954178162 | -0.006394914 | 3.547842942 | 3.853254131 | NA          | NA          |   |
| ASV_16s_2394 | 2.053840404 | 0.768250701  | 3.547015904 | 3.722263146 | 0.81115366  |             | 1 |
| ASV_16s_2395 | 2.288226599 | 0.014343935  | 3.545492598 | 3.342596428 | 0.851605462 |             | 1 |
| ASV_16s_2396 | 1.844975022 | 2.316299075  | 3.545802957 | 3.176826771 | NA          | NA          |   |
| ASV_16s_2397 | 2.319046869 | 0.960530185  | 1.748384003 | 9.624122242 | 0.21089332  | 0.87128452  |   |
| ASV_16s_2398 | 2.36294731  | -0.9288769   | 2.795852477 | 4.00785243  | 0.778872517 |             | 1 |
| ASV_16s_2399 | 2.491258047 | -0.214961831 | 2.931030734 | 6.014966493 | 0.538002879 |             | 1 |
| ASV_16s_2400 | 2.531453206 | -0.890841783 | 3.548930222 | 2.435866985 | 0.931848428 |             | 1 |
| ASV_16s_2401 | 3.034381775 | 0.161126547  | 3.1296039   | 5.994767577 | 0.540360448 |             | 1 |
| ASV_16s_2402 | 2.902207432 | 0.811837603  | 3.549276761 | 3.08678912  | 0.876859084 |             | 1 |
| ASV_16s_2403 | 2.120798281 | -0.065258543 | 3.547295457 | 3.626527507 | 0.821647804 |             | 1 |
| ASV_16s_2404 | 2.308147842 | -0.762762479 | 2.841026221 | 2.928210302 | 0.891562961 |             | 1 |
| ASV_16s_2405 | 2.336525335 | -0.119737286 | 3.546569788 | 3.733216026 | 0.809941689 |             | 1 |
| ASV_16s_2406 | 2.452689028 | 2.046087354  | 1.895126562 | 10.37915135 | 0.168085946 | 0.745304169 |   |
| ASV_16s_2407 | 2.547834246 | 11.69687241  | 3.54893177  | 1.024203374 | 0.994428596 |             | 1 |
| ASV_16s_2408 | 2.131610087 | -0.205244245 | 3.547403635 | 3.206826191 | 0.865232668 |             | 1 |
| ASV_16s_2409 | 1.960891274 | 0.710716789  | 3.547880767 | 3.672028047 | NA          | NA          |   |
| ASV_16s_2410 | 2.496570294 | 17.93052268  | 3.549222999 | 0.099218521 | 0.999997751 |             | 1 |
| ASV_16s_2411 | 2.415421744 | -0.706286593 | 3.546559503 | 2.534365874 | 0.924487125 |             | 1 |
| ASV_16s_2412 | 1.917190592 | 22.08335991  | 3.548878749 | 1.080176028 | NA          | NA          |   |
| ASV_16s_2413 | 2.314029129 | -0.772940602 | 3.547828052 | 2.913883498 | 0.892852744 |             | 1 |

|              |             |              |             |             |             |             |
|--------------|-------------|--------------|-------------|-------------|-------------|-------------|
| ASV_16s_2414 | 2.192902659 | 0.134717026  | 3.013157438 | 5.121667741 | 0.645118332 | 1           |
| ASV_16s_2415 | 2.518055025 | -0.796965577 | 3.547724681 | 3.054318554 | 0.879932243 | 1           |
| ASV_16s_2416 | 2.674660658 | 0.222711606  | 2.039523127 | 11.8077127  | 0.107062314 | 0.548286079 |
| ASV_16s_2417 | 0.571192688 | 0.317236828  | 3.550469479 | 1.053836447 | NA          | NA          |
| ASV_16s_2418 | 2.543774733 | 0.723213476  | 3.550411973 | 1.987865923 | 0.960508905 | 1           |
| ASV_16s_2419 | 2.819111943 | 0.118813041  | 3.549317795 | 5.546302563 | 0.593604939 | 1           |
| ASV_16s_2420 | 2.423575155 | 0.311346656  | 3.056425723 | 7.274246624 | 0.400894868 | 1           |
| ASV_16s_2421 | 2.126727853 | -0.342254349 | 3.546821957 | 3.626829064 | 0.821615037 | 1           |
| ASV_16s_2422 | 1.350756255 | 0.277218625  | 3.550596704 | 2.984985829 | 0.886387681 | NA          |
| ASV_16s_2423 | 2.793755377 | 0.396808034  | 3.549788804 | 1.207045172 | 0.990763779 | 1           |
| ASV_16s_2424 | 2.03549883  | 0.025688949  | 3.54797873  | 3.786174525 | 0.804050254 | 1           |
| ASV_16s_2425 | 2.090658548 | 0.575115105  | 3.54764575  | 3.778182406 | 0.804942626 | 1           |
| ASV_16s_2426 | 2.220457624 | 0.29717186   | 3.546670237 | 4.001946018 | 0.779553237 | 1           |
| ASV_16s_2427 | 2.45748191  | -0.797170893 | 3.547674127 | 2.940718139 | 0.890431573 | 1           |
| ASV_16s_2428 | 2.4018031   | 0.320821591  | 2.986632946 | 5.76392377  | 0.567569379 | 1           |
| ASV_16s_2429 | 2.262489781 | -0.154764832 | 3.547785011 | 4.594916456 | 0.709259644 | 1           |
| ASV_16s_2430 | 2.28144448  | -1.043001417 | 2.625726667 | 4.787032964 | 0.685933988 | 1           |
| ASV_16s_2431 | 2.556958505 | 1.207026992  | 3.548997625 | 1.463902801 | 0.983533098 | 1           |
| ASV_16s_2432 | 3.401020293 | -2.219776832 | 3.545567277 | 1.571110391 | NA          | NA          |
| ASV_16s_2433 | 2.076819691 | -1.658639389 | 3.231590012 | 2.203725267 | 0.947709471 | 1           |
| ASV_16s_2434 | 2.33392527  | -0.306321835 | 3.545495245 | 2.876822648 | 0.896158463 | 1           |
| ASV_16s_2435 | 2.556041486 | -0.090783932 | 3.549663138 | 1.676035285 | 0.975582767 | 1           |
| ASV_16s_2436 | 0.567531197 | 0.316927873  | 3.550476381 | 1.051690675 | NA          | NA          |
| ASV_16s_2437 | 1.313654803 | -0.275464517 | 3.547542701 | 1.904317768 | NA          | NA          |
| ASV_16s_2438 | 1.837618541 | -0.835262107 | 3.545301929 | 3.047997176 | 0.880526866 | NA          |
| ASV_16s_2439 | 2.088838631 | -0.602240303 | 2.98412469  | 4.820043785 | 0.681913294 | 1           |
| ASV_16s_2440 | 2.461965827 | -0.714175432 | 2.916768645 | 4.466331557 | 0.72476764  | 1           |
| ASV_16s_2441 | 2.221299213 | 0.158905999  | 3.547660979 | 3.060180274 | 0.879379787 | 1           |
| ASV_16s_2442 | 2.475152665 | -0.42257523  | 2.627267923 | 6.110425425 | 0.526916436 | 1           |
| ASV_16s_2443 | 1.438511348 | 16.86497383  | 3.551447195 | 0.556583664 | NA          | NA          |
| ASV_16s_2444 | 0.869632479 | -1.264045308 | 2.973320858 | 1.45064549  | 0.983969297 | NA          |
| ASV_16s_2445 | 1.822898015 | 2.487420379  | 3.094120298 | 2.623525629 | 0.917511873 | NA          |
| ASV_16s_2446 | 2.063552465 | 0.237007086  | 3.548659097 | 3.281734838 | 0.857774305 | 1           |
| ASV_16s_2447 | 2.078387288 | 1.161163408  | 3.545199036 | 2.932023002 | 0.891218614 | 1           |
| ASV_16s_2448 | 2.381209153 | -0.658430005 | 2.923588415 | 4.329564167 | 0.741131364 | 1           |
| ASV_16s_2449 | 2.297077458 | -1.973632735 | 2.672145439 | 2.398278788 | 0.934560057 | 1           |
| ASV_16s_2450 | 1.801408298 | 0.999992525  | 2.022151858 | 3.516300827 | 0.833495913 | NA          |
| ASV_16s_2451 | 2.84206366  | 0.47619165   | 2.68000505  | 8.884486897 | 0.261056195 | 1           |
| ASV_16s_2452 | 2.09232847  | -0.301574816 | 3.546668282 | 3.64805295  | NA          | NA          |
| ASV_16s_2453 | 2.241288093 | -0.315319616 | 3.546559518 | 3.663402991 | 0.817627193 | 1           |
| ASV_16s_2454 | 2.696667197 | -0.855963172 | 2.706310573 | 5.57186714  | 0.590530083 | 1           |
| ASV_16s_2455 | 2.791206209 | 0.015335951  | 1.933901841 | 11.74198674 | 0.109369449 | 0.553940245 |
| ASV_16s_2456 | 1.333979936 | -13.61681461 | 3.552157344 | 0.460787336 | 0.999577773 | NA          |
| ASV_16s_2457 | 2.047451064 | -0.096554514 | 2.492867472 | 4.535571818 | 0.716429701 | 1           |
| ASV_16s_2458 | 0.607746624 | -0.724673936 | 3.549134244 | 1.43498179  | NA          | NA          |
| ASV_16s_2459 | 2.444442472 | 0.817367878  | 3.548535161 | 3.200290016 | 0.865876214 | 1           |
| ASV_16s_2461 | 1.97523471  | 0.079091901  | 3.548054833 | 3.741976498 | 0.80897069  | NA          |
| ASV_16s_2462 | 2.041151561 | -0.010191838 | 3.548001278 | 3.706757353 | 0.812865528 | 1           |
| ASV_16s_2463 | 2.657151187 | 0.403762432  | 3.549145218 | 1.51266925  | NA          | NA          |
| ASV_16s_2464 | 3.42449631  | 6.839064585  | 3.550038556 | 2.599144493 | 0.919448221 | 1           |
| ASV_16s_2465 | 1.981919242 | 2.808984958  | 2.732484717 | 4.691724342 | 0.697524253 | NA          |
| ASV_16s_2466 | 1.846983397 | -1.416866637 | 2.902699229 | 3.170166357 | 0.868826823 | NA          |
| ASV_16s_2467 | 1.62022861  | -2.129873828 | 3.547084503 | 1.06167564  | 0.993771335 | NA          |
| ASV_16s_2468 | 2.209403775 | -27.22561214 | 3.550230066 | 1.137861306 | 0.992287974 | 1           |
| ASV_16s_2469 | 2.62311268  | 0.218606554  | 2.972222498 | 6.029732877 | 0.536281918 | 1           |
| ASV_16s_2470 | 2.330516236 | 1.053479197  | 3.061082473 | 4.194580553 | 0.757112651 | 1           |
| ASV_16s_2471 | 1.334185187 | -18.58544765 | 3.552157344 | 0.170710602 | 0.999985382 | NA          |
| ASV_16s_2472 | 2.697556363 | 0.568839516  | 3.549055086 | 2.047572243 | 0.957160451 | 1           |
| ASV_16s_2473 | 2.658297954 | 1.588202257  | 3.548590187 | 2.258643951 | 0.94415008  | 1           |
| ASV_16s_2474 | 0.357613482 | -0.170259489 | 3.55058063  | 1.096731795 | NA          | NA          |
| ASV_16s_2475 | 2.190513892 | 1.995669833  | 2.544002072 | 4.171117562 | 0.759870606 | 1           |
| ASV_16s_2476 | 1.851219431 | 1.444478691  | 2.487145655 | 5.689251458 | 0.576465449 | NA          |
| ASV_16s_2477 | 1.369617329 | -14.26982885 | 3.552157344 | 0.476954822 | 0.999526565 | NA          |
| ASV_16s_2478 | 0.356829242 | -0.170258876 | 3.550580794 | 1.095618956 | NA          | NA          |
| ASV_16s_2479 | 2.206202687 | 1.382538098  | 3.053334832 | 3.980409159 | 0.782031113 | 1           |
| ASV_16s_2480 | 2.125651454 | 0.377940558  | 3.546678491 | 3.591836844 | 0.825404673 | 1           |
| ASV_16s_2481 | 2.159984765 | 1.974744895  | 2.406511964 | 3.337328136 | 0.852143211 | 1           |

|              |             |              |             |              |             |    |   |
|--------------|-------------|--------------|-------------|--------------|-------------|----|---|
| ASV_16s_2482 | 2.107611573 | -2.255854849 | 3.544228045 | 1.464945128  | NA          | NA |   |
| ASV_16s_2484 | 1.949099579 | 0.072605959  | 3.548108517 | 3.70122018   | 0.813475725 | NA |   |
| ASV_16s_2485 | 2.365892415 | 2.426449046  | 2.656421733 | 4.173704787  | 0.759566802 |    | 1 |
| ASV_16s_2486 | 2.065322219 | 1.271802907  | 3.39429707  | 2.537559717  | 0.924242324 |    | 1 |
| ASV_16s_2487 | 3.278798179 | 0.750403806  | 3.54805195  | 2.235665357  | 0.945654123 |    | 1 |
| ASV_16s_2488 | 2.841887709 | 17.36355848  | 3.551442474 | 0.884585803  | NA          | NA |   |
| ASV_16s_2489 | 1.04483364  | -20.70764114 | 3.551451082 | 1.242713945  | NA          | NA |   |
| ASV_16s_2490 | 2.636243082 | -0.48937226  | 2.325587138 | 7.838510255  | 0.347049213 |    | 1 |
| ASV_16s_2491 | 2.173708097 | -0.721364026 | 3.547975717 | 2.959595993  | 0.888714595 |    | 1 |
| ASV_16s_2492 | 2.072568872 | 2.983987043  | 3.454556278 | 2.825526446  | 0.900659691 |    | 1 |
| ASV_16s_2493 | 2.389121917 | -0.796720592 | 3.547776841 | 3.025778509  | 0.882607307 |    | 1 |
| ASV_16s_2494 | 3.031085076 | 0.592093285  | 3.549046036 | 3.640182257  | NA          | NA |   |
| ASV_16s_2495 | 1.86681681  | -0.847443294 | 3.545557131 | 2.301685483  | NA          | NA |   |
| ASV_16s_2496 | 3.408443906 | -3.845355025 | 3.543889293 | 0.619556054  | NA          | NA |   |
| ASV_16s_2497 | 3.081793906 | -4.653888422 | 3.543855242 | 0.348911688  | NA          | NA |   |
| ASV_16s_2498 | 2.116163273 | -0.39576547  | 3.376483051 | 2.934644311  | 0.890981599 |    | 1 |
| ASV_16s_2499 | 2.550432645 | 0.364556365  | 3.550492034 | 1.18152556   | 0.991346065 |    | 1 |
| ASV_16s_2500 | 2.500832829 | 1.184346604  | 3.548158357 | 3.548324683  | 0.830080797 |    | 1 |
| ASV_16s_2501 | 1.917486644 | -0.329451252 | 3.549017839 | 3.272896629  | 0.858662112 | NA |   |
| ASV_16s_2502 | 0.352908042 | -0.1702544   | 3.550581625 | 1.090018107  | NA          | NA |   |
| ASV_16s_2503 | 1.315340371 | -29.98480496 | 3.550786947 | 0.20974367   | 0.999970399 | NA |   |
| ASV_16s_2504 | 2.06410495  | 0.391934464  | 3.551318072 | 0.5486594    | NA          | NA |   |
| ASV_16s_2505 | 2.793258992 | 1.128809377  | 3.549431914 | 3.006738504  | 0.884378165 |    | 1 |
| ASV_16s_2506 | 2.032994019 | 0.269148048  | 3.285765923 | 3.880654595  | 0.793416555 |    | 1 |
| ASV_16s_2507 | 2.727226272 | 0.565169915  | 2.864373832 | 7.224220057  | 0.405913641 |    | 1 |
| ASV_16s_2508 | 2.023338613 | 17.47785308  | 3.55144303  | 0.665974615  | NA          | NA |   |
| ASV_16s_2509 | 0.620589284 | -22.45097793 | 3.551440756 | -0.019449555 | NA          | NA |   |
| ASV_16s_2510 | 2.14437175  | 0.125900766  | 3.547419553 | 3.094090001  | 0.876163797 |    | 1 |
| ASV_16s_2511 | 2.065170523 | -0.002706183 | 3.547722569 | 4.146672165  | 0.762737204 |    | 1 |
| ASV_16s_2512 | 2.131388578 | 0.99377988   | 2.423615716 | 7.907272645  | 0.340841549 |    | 1 |
| ASV_16s_2513 | 2.319748958 | -0.79676838  | 3.547766272 | 2.990247586  | 0.885902941 |    | 1 |
| ASV_16s_2514 | 2.962768627 | 1.209950988  | 2.852076864 | 6.212354623  | 0.515184367 |    | 1 |
| ASV_16s_2515 | 1.995328087 | -0.544571847 | 3.547093876 | 1.883538469  | NA          | NA |   |
| ASV_16s_2516 | 2.870907643 | 0.945443858  | 2.811020788 | 4.772809443  | 0.687665521 |    | 1 |
| ASV_16s_2518 | 2.277876463 | -0.993002912 | 3.546865575 | 2.523848679  | 0.925290554 |    | 1 |
| ASV_16s_2519 | 2.485415868 | 0.829662248  | 3.549710366 | 3.04196198   | 0.881093447 |    | 1 |
| ASV_16s_2520 | 2.391567762 | 0.790106763  | 3.016337215 | 6.32890833   | 0.501911655 |    | 1 |
| ASV_16s_2521 | 2.59848036  | 0.587627542  | 3.37641893  | 4.582898466  | 0.710713277 |    | 1 |
| ASV_16s_2522 | 0.650453354 | -0.683853144 | 3.549420268 | 1.075420162  | NA          | NA |   |
| ASV_16s_2523 | 2.363061318 | -0.797132694 | 3.547699619 | 2.938613838  | 0.890622264 |    | 1 |
| ASV_16s_2524 | 2.1366788   | 0.34836631   | 3.549853806 | 1.206222349  | 0.990782923 |    | 1 |
| ASV_16s_2525 | 2.605998699 | 0.271422899  | 3.549135517 | 1.503509908  | NA          | NA |   |
| ASV_16s_2526 | 2.5451758   | -0.368898479 | 2.374227911 | 3.206050108  | 0.865309142 |    | 1 |
| ASV_16s_2527 | 2.032296935 | 0.477879098  | 3.54999083  | 0.706166083  | NA          | NA |   |
| ASV_16s_2528 | 1.599911386 | 0.115015316  | 3.30061463  | 2.169488679  | 0.949866809 | NA |   |
| ASV_16s_2529 | 1.890283554 | -0.361230867 | 3.549015468 | 3.215254897  | 0.864401047 | NA |   |
| ASV_16s_2530 | 2.051739611 | -0.321703207 | 3.547033233 | 3.63629746   | 0.820585255 |    | 1 |
| ASV_16s_2531 | 2.314221918 | 0.749545773  | 2.688606604 | 6.103931211  | 0.527667696 |    | 1 |
| ASV_16s_2532 | 2.548937978 | -1.006783372 | 3.549459232 | 2.007751151  | 0.959410114 |    | 1 |
| ASV_16s_2533 | 0.646078107 | -0.683832395 | 3.549424908 | 1.073243703  | NA          | NA |   |
| ASV_16s_2534 | 0.373081931 | -0.170271067 | 3.550577538 | 1.118184437  | 0.992690348 | NA |   |
| ASV_16s_2535 | 1.835147688 | 0.048366622  | 3.547883013 | 3.833498944  | NA          | NA |   |
| ASV_16s_2536 | 2.084973506 | -1.68164773  | 3.546898465 | 1.878775215  | 0.966244024 |    | 1 |
| ASV_16s_2537 | 2.099531712 | -1.212106964 | 3.081381849 | 2.638646828  | 0.916300135 |    | 1 |
| ASV_16s_2538 | 2.423343288 | 3.353994562  | 3.546376925 | 0.771119337  | NA          | NA |   |
| ASV_16s_2539 | 2.318681755 | 2.847098693  | 3.547164444 | 0.858432382  | NA          | NA |   |
| ASV_16s_2540 | 1.29508674  | -30          | 3.550632413 | 0.616382404  | 0.998899009 | NA |   |
| ASV_16s_2541 | 1.255194546 | -12.18554662 | 3.552157344 | 0.423439844  | 0.999681349 | NA |   |
| ASV_16s_2542 | 2.374044554 | 1.273971254  | 3.549011111 | 3.313294905  | 0.854587361 |    | 1 |
| ASV_16s_2543 | 2.809396692 | 1.188650428  | 3.549324646 | 1.652553347  | 0.976553796 |    | 1 |
| ASV_16s_2544 | 2.773031399 | 17.37052261  | 3.551442571 | 0.869540042  | NA          | NA |   |
| ASV_16s_2545 | 0.834719276 | 17.77572637  | 3.551445573 | 0.092115592  | NA          | NA |   |
| ASV_16s_2546 | 2.271113464 | -0.859453942 | 2.793923327 | 4.057554221  | 0.773124939 |    | 1 |
| ASV_16s_2547 | 2.140975972 | -0.976385241 | 3.546871348 | 2.412635811  | 0.933530765 |    | 1 |
| ASV_16s_2548 | 2.116294442 | 0.355612415  | 3.54963087  | 1.379655172  | 0.986186273 |    | 1 |
| ASV_16s_2549 | 3.108700796 | 0.161504589  | 3.547874943 | 3.337589242  | 0.852116575 |    | 1 |
| ASV_16s_2550 | 2.057540865 | 3.02674916   | 2.508844896 | 5.107672369  | 0.646825242 |    | 1 |

|              |             |              |             |                |                |             |
|--------------|-------------|--------------|-------------|----------------|----------------|-------------|
| ASV_16s_2551 | 2.277407183 | 0.256242942  | 2.569787335 | 6.365825932    | 0.497740832    | 1           |
| ASV_16s_2552 | 2.346018178 | -0.664367672 | 2.653971117 | 4.291276888    | 0.745683058    | 1           |
| ASV_16s_2553 | 1.747853618 | 2.183798782  | 3.54656993  | 1.979036741    | 0.96099151 NA  |             |
| ASV_16s_2554 | 1.921258626 | -2.179639213 | 3.5445498   | 1.971235276    | 0.961415243 NA |             |
| ASV_16s_2555 | 1.36743529  | 16.86730319  | 3.551447613 | 0.435608933 NA | NA             |             |
| ASV_16s_2556 | 2.316274561 | -0.843243444 | 2.771811883 | 4.457227015    | 0.725861556    | 1           |
| ASV_16s_2557 | 3.164377807 | 0.393149271  | 3.548055931 | 3.362769958    | 0.849539821    | 1           |
| ASV_16s_2558 | 2.283816844 | 0.700293147  | 2.640009538 | 7.10293181     | 0.41824198     | 1           |
| ASV_16s_2559 | 1.707213543 | -1.500271887 | 3.545973673 | 1.764229373    | 0.971731089 NA |             |
| ASV_16s_2560 | 2.357286267 | 0.094954811  | 2.729746656 | 6.443665587    | 0.489001138    | 1           |
| ASV_16s_2561 | 0.751601541 | -0.450806899 | 3.549304227 | 2.725957131 NA | NA             |             |
| ASV_16s_2562 | 1.899871341 | 0.067834095  | 3.547794232 | 4.046251436    | 0.774435001 NA |             |
| ASV_16s_2563 | 2.710436566 | 0.881728233  | 2.152248351 | 9.722852604    | 0.204830682    | 0.854755659 |
| ASV_16s_2564 | 2.793757368 | 2.004242041  | 3.275461466 | 2.726078924    | 0.909133858    | 1           |
| ASV_16s_2565 | 2.280047799 | 1.68318189   | 2.433267053 | 6.490853871    | 0.483739703    | 1           |
| ASV_16s_2566 | 0.54079056  | -0.607860836 | 3.549895902 | 1.005149785 NA | NA             |             |
| ASV_16s_2567 | 1.924710194 | 0.832497999  | 3.546732499 | 3.73125379     | 0.810158983 NA |             |
| ASV_16s_2568 | 1.484376479 | 2.136418432  | 3.5470829   | 1.432175054 NA | NA             |             |
| ASV_16s_2569 | 1.479763627 | -22.9354016  | 3.551442474 | 0.581631783 NA | NA             |             |
| ASV_16s_2570 | 3.349872521 | 0.159554248  | 3.547972451 | 3.468480757    | 0.838552605    | 1           |
| ASV_16s_2571 | 3.086982101 | 0.786499867  | 3.527716758 | 3.733151931    | 0.809948787    | 1           |
| ASV_16s_2572 | 2.68694025  | 12.23816043  | 3.550117248 | 1.781959907 NA | NA             |             |
| ASV_16s_2573 | 2.588629384 | 17.60865456  | 3.550784636 | 0.641848046    | 0.99874375     | 1           |
| ASV_16s_2574 | 2.148362564 | -0.963343683 | 3.547229744 | 2.479950744    | 0.928599212    | 1           |
| ASV_16s_2575 | 2.375681445 | -0.80790737  | 3.547653718 | 2.59433402     | 0.919827713    | 1           |
| ASV_16s_2576 | 2.250875942 | 0.237995362  | 3.545642159 | 3.558316339    | 0.829010639    | 1           |
| ASV_16s_2577 | 1.239193959 | -13.49410357 | 3.552157344 | 0.415566907    | 0.9997007 NA   |             |
| ASV_16s_2578 | 1.934311031 | 1.866013496  | 3.546035728 | 3.172452817    | 0.868603755 NA |             |
| ASV_16s_2579 | 1.284271956 | 29.79700685  | 3.550270812 | 0.495406435    | 0.999463128 NA |             |
| ASV_16s_2580 | 2.505953673 | 3.364551682  | 3.548698356 | 2.031560799    | 0.958072897    | 1           |
| ASV_16s_2581 | 1.935697452 | 0.561547801  | 3.547536796 | 3.238946941    | 0.862053064 NA |             |
| ASV_16s_2582 | 1.846282498 | 0.075167496  | 3.547742002 | 4.18006763 NA  | NA             |             |
| ASV_16s_2583 | 2.234818421 | -0.707940567 | 3.547690443 | 2.492907774    | 0.927630169    | 1           |
| ASV_16s_2584 | 2.287497442 | -0.799026597 | 3.170316871 | 3.703638791    | 0.813209267    | 1           |
| ASV_16s_2585 | 2.302190166 | -0.799106446 | 3.167820237 | 3.729288476    | 0.810376545    | 1           |
| ASV_16s_2586 | 2.220041875 | -0.796104229 | 3.547903897 | 2.977645193    | 0.887062501    | 1           |
| ASV_16s_2587 | 3.236879895 | -3.758333756 | 3.543972526 | 0.621633345 NA | NA             |             |
| ASV_16s_2588 | 2.813606784 | -0.79034522  | 3.546585969 | 1.844917853 NA | NA             |             |
| ASV_16s_2589 | 1.752719675 | 1.026566181  | 3.547505979 | 2.991555238    | 0.88578234 NA  |             |
| ASV_16s_2590 | 2.705257434 | 0.498446414  | 3.547948281 | 4.609933068    | 0.707442232    | 1           |
| ASV_16s_2591 | 0.562781094 | -0.009497306 | 3.550573258 | 2.705147871    | 0.910874023 NA |             |
| ASV_16s_2592 | 1.877337217 | -0.016839462 | 3.54783694  | 3.809290823    | 0.801462759 NA |             |
| ASV_16s_2593 | 2.231631942 | -0.109550889 | 3.54663794  | 3.509034383    | 0.834267646    | 1           |
| ASV_16s_2594 | 2.210292639 | -0.652299073 | 3.547806142 | 2.919894761    | 0.892312376    | 1           |
| ASV_16s_2595 | 1.9750453   | -1.067414334 | 2.340435214 | 3.594524054    | 0.825114559 NA |             |
| ASV_16s_2596 | 3.787994173 | -3.905018707 | 3.543714652 | 0.634285762 NA | NA             |             |
| ASV_16s_2597 | 1.214837155 | -13.79341292 | 3.552157344 | 0.403390976    | 0.999729016 NA |             |
| ASV_16s_2598 | 2.192381369 | -0.187704848 | 3.214204629 | 3.868737012    | 0.794766205    | 1           |
| ASV_16s_2599 | 2.201803877 | -0.244094382 | 3.139976317 | 4.956385748    | 0.66528581     | 1           |
| ASV_16s_2600 | 2.564164697 | 0.394987571  | 3.550076996 | 1.112854394    | 0.99279701     | 1           |
| ASV_16s_2601 | 1.939046833 | 1.047617772  | 3.547716189 | 3.527214338    | 0.832334621 NA |             |
| ASV_16s_2602 | 2.173612396 | -0.795550558 | 3.548021328 | 2.953112537    | 0.889305547    | 1           |
| ASV_16s_2603 | 2.437167218 | 0.350506239  | 3.510166421 | 1.586257805    | 0.979172302    | 1           |
| ASV_16s_2604 | 1.94999362  | 0.652951007  | 3.547611595 | 2.708129162    | 0.910627101 NA |             |
| ASV_16s_2605 | 2.262623329 | -0.796995022 | 3.547771426 | 2.965928204    | 0.888136152    | 1           |
| ASV_16s_2606 | 2.049351708 | -2.3762593   | 3.54588824  | 2.108527675    | 0.953590003    | 1           |
| ASV_16s_2607 | 2.355295205 | 15.65179286  | 3.551077268 | 0.995643773    | 0.994898503    | 1           |
| ASV_16s_2608 | 2.934799828 | 0.27141867   | 3.549109656 | 1.541857001 NA | NA             |             |
| ASV_16s_2609 | 2.542960842 | 1.518065069  | 2.917306337 | 3.814914198    | 0.80083189     | 1           |
| ASV_16s_2610 | 2.530635822 | 0.694088305  | 3.550581599 | 2.165578759    | 0.950110157    | 1           |
| ASV_16s_2611 | 2.299078412 | -0.285026281 | 3.547312205 | 3.633576643    | 0.820881359    | 1           |
| ASV_16s_2612 | 1.328071588 | -18.53857742 | 3.552157344 | 0.123907453    | 0.999995151 NA |             |
| ASV_16s_2613 | 0.999460698 | -0.294044052 | 3.548529926 | 2.01661697     | 0.95891493 NA  |             |
| ASV_16s_2614 | 3.506273734 | 9.274880411  | 3.54968358  | 2.440652699    | 0.931499284    | 1           |
| ASV_16s_2615 | 1.76839919  | -0.318738651 | 3.549035605 | 3.205198158 NA | NA             |             |
| ASV_16s_2616 | 2.105330867 | -0.962754201 | 3.546504213 | 3.21760983     | 0.864168348    | 1           |
| ASV_16s_2617 | 2.332991144 | 0.068496559  | 2.214085612 | 8.611426803    | 0.281770328    | 1           |

|              |             |              |             |              |             |             |   |
|--------------|-------------|--------------|-------------|--------------|-------------|-------------|---|
| ASV_16s_2618 | 3.404889662 | 0.245560834  | 3.546227663 | 3.779910135  | NA          | NA          |   |
| ASV_16s_2619 | 1.242713256 | 0.323344478  | 3.549690099 | 1.306015437  | 0.988277691 | NA          |   |
| ASV_16s_2620 | 2.375162281 | 0.828212426  | 3.54816031  | 2.842137777  | 0.89921159  |             | 1 |
| ASV_16s_2621 | 1.990481086 | 0.9899084    | 3.546975657 | 3.694045101  | 0.814265538 | NA          |   |
| ASV_16s_2622 | 2.042272792 | -0.381489389 | 3.547829572 | 2.820669024  | 0.901081398 |             | 1 |
| ASV_16s_2623 | 1.926287461 | -0.817123207 | 3.245492206 | 3.850963255  | 0.796774685 | NA          |   |
| ASV_16s_2624 | 1.561934505 | -9.023503976 | 3.548581626 | 1.405182728  | 0.985411994 | NA          |   |
| ASV_16s_2625 | 1.815845674 | -0.733714398 | 2.621864919 | 4.31705773   | 0.74261969  | NA          |   |
| ASV_16s_2626 | 2.411522272 | 0.400584019  | 2.743376665 | 5.27624112   | 0.626292027 |             | 1 |
| ASV_16s_2627 | 2.597492055 | 7.381182606  | 3.550135599 | 1.712629663  | 0.974023889 |             | 1 |
| ASV_16s_2628 | 2.12446894  | -0.783950716 | 2.872077854 | 3.510174908  | 0.834146595 |             | 1 |
| ASV_16s_2629 | 1.893430624 | 2.737574818  | 2.328292608 | 5.402337972  | 0.610988385 | NA          |   |
| ASV_16s_2630 | 2.310893665 | 2.796669785  | 2.972996473 | 1.714946502  | 0.97392332  |             | 1 |
| ASV_16s_2631 | 0.81719022  | -20.42370707 | 3.550914115 | 0.589697612  | NA          | NA          |   |
| ASV_16s_2632 | 1.314722365 | 16.80289059  | 3.551448022 | 0.411478887  | NA          | NA          |   |
| ASV_16s_2633 | 2.173666466 | 0.049068157  | 2.292648572 | 9.238906207  | 0.235955689 | 0.949152858 |   |
| ASV_16s_2634 | 2.561729304 | -7.577348178 | 1.950087348 | 8.12164514   | 0.321989751 |             | 1 |
| ASV_16s_2635 | 3.113778707 | -2.854106725 | 3.544778348 | 0.722800318  | NA          | NA          |   |
| ASV_16s_2636 | 2.121815373 | -0.819463851 | 2.157471535 | 7.998535611  | 0.332723049 |             | 1 |
| ASV_16s_2637 | 2.281848916 | 0.1739396    | 3.548254857 | 3.673838676  | 0.816484405 |             | 1 |
| ASV_16s_2638 | 2.154567123 | 0.860524319  | 3.048045816 | 2.655097143  | 0.914972546 |             | 1 |
| ASV_16s_2639 | 1.315511379 | -30          | 3.550166282 | 0.977916537  | 0.99517695  | NA          |   |
| ASV_16s_2640 | 2.881808156 | -1.942669934 | 3.543730039 | 1.26151979   | NA          | NA          |   |
| ASV_16s_2641 | 2.159192638 | 1.335123241  | 2.906174704 | 5.628381966  | 0.583747121 |             | 1 |
| ASV_16s_2642 | 2.507126442 | 15.69423159  | 3.550981581 | 2.169016248  | 0.949896246 |             | 1 |
| ASV_16s_2643 | 1.913765598 | 0.668021994  | 3.547659206 | 3.808356852  | NA          | NA          |   |
| ASV_16s_2644 | 2.282966561 | 0.234109257  | 3.135941463 | 2.678171834  | 0.913094053 |             | 1 |
| ASV_16s_2645 | 1.999753409 | -21.57608823 | 3.551462129 | 1.34876992   | 0.987088981 |             | 1 |
| ASV_16s_2646 | 2.361978904 | 0.35542742   | 3.55028175  | 1.844767201  | 0.967930333 |             | 1 |
| ASV_16s_2647 | 0.806831806 | 17.79016602  | 3.551445827 | 0.071292906  | 0.999999285 | NA          |   |
| ASV_16s_2648 | 2.485385792 | -0.091065871 | 2.596996794 | 7.806110084  | 0.350001172 |             | 1 |
| ASV_16s_2649 | 2.331146997 | 0.940360691  | 3.549117085 | 2.254257168  | 0.944438847 |             | 1 |
| ASV_16s_2650 | 1.302319323 | 16.83695542  | 3.551448114 | 0.405663742  | NA          | NA          |   |
| ASV_16s_2651 | 1.778143995 | -0.284032771 | 3.549041199 | 3.242507567  | 0.861698874 | NA          |   |
| ASV_16s_2652 | 1.76404963  | -0.044212682 | 3.547940681 | 3.564091791  | 0.828391067 | NA          |   |
| ASV_16s_2653 | 1.890628789 | 0.069801629  | 3.548104995 | 3.668034351  | 0.81712029  | NA          |   |
| ASV_16s_2654 | 1.95805514  | -0.191945433 | 3.548680782 | 2.600440876  | 0.919345807 | NA          |   |
| ASV_16s_2655 | 1.991318653 | 2.458725931  | 3.543375867 | 1.002045092  | NA          | NA          |   |
| ASV_16s_2656 | 1.994035156 | 0.215645229  | 3.548288234 | 2.802596869  | 0.902643416 | NA          |   |
| ASV_16s_2657 | 1.961748979 | 3.98903356   | 2.337421491 | 1.711173485  | 0.974086984 | NA          |   |
| ASV_16s_2658 | 0.851871249 | -1.983002252 | 3.54790861  | 0.570414653  | NA          | NA          |   |
| ASV_16s_2659 | 2.590241646 | 0.916628557  | 3.549303585 | 2.766114836  | 0.905762956 |             | 1 |
| ASV_16s_2660 | 1.824462937 | 0.309363029  | 3.548625209 | 3.1987048    | 0.866032116 | NA          |   |
| ASV_16s_2661 | 2.159534058 | -0.79689442  | 3.54774953  | 2.88706495   | 0.895249338 |             | 1 |
| ASV_16s_2662 | 2.226459247 | 1.227162405  | 2.869733661 | 4.624947955  | 0.705623875 |             | 1 |
| ASV_16s_2663 | 1.165467416 | -28.04006925 | 3.551319338 | 0.004037052  | 1           | NA          |   |
| ASV_16s_2664 | 2.16730667  | -0.665637274 | 3.547069809 | 2.407163653  | 0.933924018 |             | 1 |
| ASV_16s_2665 | 2.146198978 | -0.796632403 | 3.547791584 | 2.919231535  | 0.892372052 |             | 1 |
| ASV_16s_2666 | 2.222392516 | -0.902149541 | 3.214356813 | 3.197802392  | 0.866120834 |             | 1 |
| ASV_16s_2667 | 1.875193481 | -1.872393578 | 3.256934855 | 2.4469076    | 0.931041633 | NA          |   |
| ASV_16s_2668 | 2.035538714 | -1.859039233 | 3.546875151 | 0.868535193  | NA          | NA          |   |
| ASV_16s_2669 | 0.325459639 | -0.170228047 | 3.550587998 | 1.048996291  | NA          | NA          |   |
| ASV_16s_2670 | 2.126468459 | -0.590767001 | 2.178903108 | 9.393704363  | 0.225611542 | 0.921088607 |   |
| ASV_16s_2671 | 2.295041286 | -0.901036351 | 2.648524433 | 4.3168782    | 0.742641045 |             | 1 |
| ASV_16s_2672 | 2.314020335 | -0.475470173 | 2.692788943 | 6.265714969  | 0.509088451 |             | 1 |
| ASV_16s_2673 | 2.323437807 | 0.120860257  | 3.548249819 | 3.118621319  | 0.873816169 |             | 1 |
| ASV_16s_2674 | 1.232827295 | -30          | 3.550894664 | 0.413723924  | 0.999705111 | NA          |   |
| ASV_16s_2675 | 2.107806914 | -0.985476754 | 3.546848653 | 2.312992037  | 0.940508907 |             | 1 |
| ASV_16s_2676 | 1.893321475 | 0.449124063  | 3.549730379 | 0.790377332  | NA          | NA          |   |
| ASV_16s_2677 | 1.219184622 | -29.91319215 | 3.550632354 | 0.579437283  | 0.999100517 | NA          |   |
| ASV_16s_2678 | 1.283714762 | 16.77990868  | 3.55144827  | 0.39683178   | NA          | NA          |   |
| ASV_16s_2679 | 2.223101778 | -2.098459345 | 3.263421774 | 2.622865833  | 0.917564558 |             | 1 |
| ASV_16s_2680 | 2.18000112  | -0.841661956 | 2.761644039 | 4.852899592  | 0.677909018 |             | 1 |
| ASV_16s_2681 | 1.586539316 | 17.16912602  | 3.549123726 | -0.107021855 | NA          | NA          |   |
| ASV_16s_2682 | 1.592298907 | -0.351068112 | 3.082217732 | 2.979390596  | 0.886902199 | NA          |   |
| ASV_16s_2683 | 2.091264    | 0.960105656  | 3.366049224 | 2.757913093  | 0.906458022 |             | 1 |
| ASV_16s_2684 | 1.643449392 | -1.224342177 | 3.54698164  | 1.806116739  | 0.969788155 | NA          |   |

|              |             |              |             |              |             |             |
|--------------|-------------|--------------|-------------|--------------|-------------|-------------|
| ASV_16s_2685 | 2.500766976 | 6.83838578   | 3.550147365 | 1.651173346  | 0.976610151 | 1           |
| ASV_16s_2686 | 2.492867689 | 1.188191355  | 3.549433377 | 1.653492446  | 0.9765154   | 1           |
| ASV_16s_2687 | 1.699110269 | -0.268945123 | 3.54905356  | 3.207853918  | NA          | NA          |
| ASV_16s_2688 | 0.599408808 | -0.683592079 | 3.549478587 | 1.049067006  | NA          | NA          |
| ASV_16s_2689 | 1.846832221 | 0.044161876  | 3.547852185 | 3.87664494   | 0.793870904 | NA          |
| ASV_16s_2690 | 1.781990372 | -0.062120207 | 3.545507328 | 2.635406818  | NA          | NA          |
| ASV_16s_2691 | 1.991449428 | 2.459351226  | 3.544324299 | 2.392691591  | 0.934958461 | NA          |
| ASV_16s_2692 | 2.415769478 | -10.1230354  | 3.548007918 | 1.574678429  | 0.979611109 | 1           |
| ASV_16s_2693 | 2.151972846 | 0.629710087  | 3.549465615 | 4.743650397  | 0.691213389 | 1           |
| ASV_16s_2694 | 1.920576471 | -0.200393982 | 3.546757391 | 3.622652471  | 0.822068697 | NA          |
| ASV_16s_2695 | 1.880153682 | -2.355943922 | 3.382238787 | 1.934386975  | 0.963382396 | NA          |
| ASV_16s_2696 | 2.460640177 | 2.860143901  | 3.549150974 | 2.233816454  | 0.94577422  | 1           |
| ASV_16s_2697 | 2.01185572  | -0.964142586 | 3.547868551 | 3.213246008  | 0.864599432 | 1           |
| ASV_16s_2698 | 2.038019444 | 14.60537898  | 3.551478935 | 2.032442741  | 0.958022914 | 1           |
| ASV_16s_2699 | 1.744143854 | -0.34572346  | 3.549033924 | 3.158313428  | 0.869980839 | NA          |
| ASV_16s_2700 | 2.117891497 | -0.83010359  | 3.547593783 | 2.235837485  | 0.945642935 | 1           |
| ASV_16s_2701 | 1.753349365 | 2.348228208  | 3.545654173 | 2.988266286  | 0.886085569 | NA          |
| ASV_16s_2702 | 2.366169601 | 1.228363637  | 2.353788412 | 6.858020028  | 0.44381112  | 1           |
| ASV_16s_2703 | 1.240043421 | 14.80780311  | 3.550996392 | 0.940937466  | 0.995725872 | NA          |
| ASV_16s_2704 | 1.690788342 | -0.020065152 | 2.550924161 | 2.701472761  | 0.91117798  | NA          |
| ASV_16s_2705 | 2.959914691 | 6.064262865  | 3.55004078  | 2.579122757  | 0.92102214  | 1           |
| ASV_16s_2706 | 2.855750047 | 6.53566061   | 3.550069675 | 2.455798632  | 0.930388531 | 1           |
| ASV_16s_2707 | 2.608306364 | 2.234211602  | 3.548525891 | 2.9227064    | 0.892059233 | 1           |
| ASV_16s_2708 | 1.943497724 | 0.258348808  | 2.855298787 | 4.737410575  | 0.691972255 | NA          |
| ASV_16s_2709 | 1.926724083 | -0.901518199 | 3.547569237 | 1.882775801  | 0.966042475 | NA          |
| ASV_16s_2710 | 2.033853235 | -6.810686929 | 2.95015379  | 1.277563728  | 0.989030017 | 1           |
| ASV_16s_2711 | 2.479856816 | 0.334049347  | 2.853728534 | 3.014453254  | 0.883661974 | 1           |
| ASV_16s_2712 | 1.992320883 | 0.68634076   | 3.549102656 | 3.091916069  | NA          | NA          |
| ASV_16s_2713 | 2.532909986 | 2.241765271  | 3.546794884 | 3.342933596  | 0.851571023 | 1           |
| ASV_16s_2714 | 0.558581592 | -6.98312679  | 3.552157344 | -0.072766691 | NA          | NA          |
| ASV_16s_2715 | 1.767187837 | 0.018741752  | 3.54798134  | 3.647461859  | 0.819368667 | NA          |
| ASV_16s_2716 | 1.933883418 | -0.541376248 | 3.546894129 | 2.903809289  | 0.893755735 | NA          |
| ASV_16s_2717 | 1.73584451  | 1.277035737  | 3.547447813 | 3.430093038  | NA          | NA          |
| ASV_16s_2718 | 1.972053163 | -0.491617503 | 3.546815627 | 3.554877684  | 0.829379182 | NA          |
| ASV_16s_2719 | 2.145980021 | -0.830060046 | 2.981138073 | 3.350985969  | 0.850747671 | 1           |
| ASV_16s_2720 | 2.163903084 | 0.475242685  | 3.550617986 | 4.150935179  | 0.762237812 | 1           |
| ASV_16s_2721 | 2.312117876 | 0.694079841  | 3.550584376 | 2.119517475  | 0.952930027 | 1           |
| ASV_16s_2722 | 0.532445556 | -1.229595412 | 3.548976767 | 0.590466511  | NA          | NA          |
| ASV_16s_2723 | 1.923074945 | 1.191941009  | 2.59742434  | 5.613987392  | 0.585472809 | NA          |
| ASV_16s_2724 | 1.426114321 | 3.323357352  | 3.546938503 | 0.614856927  | NA          | NA          |
| ASV_16s_2725 | 2.256785827 | 0.366812199  | 3.550465027 | 1.400291805  | 0.985562325 | 1           |
| ASV_16s_2726 | 1.708750153 | -0.306026727 | 3.549045067 | 3.184329538  | 0.867442696 | NA          |
| ASV_16s_2727 | 0.369074015 | -0.170262959 | 3.550578317 | 1.112671022  | 0.992800662 | NA          |
| ASV_16s_2728 | 1.92571675  | -0.474227576 | 3.546911935 | 3.639429032  | 0.820244263 | NA          |
| ASV_16s_2729 | 1.234617604 | 0.644578504  | 3.550253916 | 0.827729459  | 0.997150559 | NA          |
| ASV_16s_2730 | 1.985738052 | 1.104234797  | 1.694060423 | 11.54491094  | 0.116553306 | NA          |
| ASV_16s_2731 | 1.857822075 | -0.339953837 | 3.547722981 | 3.206193192  | 0.865295044 | NA          |
| ASV_16s_2732 | 1.692292506 | 0.692541392  | 3.547953684 | 3.49407773   | NA          | NA          |
| ASV_16s_2733 | 2.012034598 | -0.286432056 | 2.303555351 | 6.926058559  | 0.436619066 | 1           |
| ASV_16s_2734 | 2.382736309 | -0.713904669 | 2.919902757 | 4.198894109  | 0.756604931 | 1           |
| ASV_16s_2735 | 2.285399298 | -0.074031133 | 2.029097849 | 11.64746286  | 0.112764673 | 0.562893349 |
| ASV_16s_2736 | 2.111967464 | 0.024660095  | 3.547324611 | 1.846431415  | NA          | NA          |
| ASV_16s_2737 | 1.43990527  | 1.891079666  | 3.546533953 | 1.513397314  | 0.981842218 | NA          |
| ASV_16s_2738 | 1.440687528 | -1.440593322 | 3.548468468 | 0.914322131  | NA          | NA          |
| ASV_16s_2739 | 1.86594553  | 0.21407053   | 3.546637953 | 3.571322751  | 0.827614338 | NA          |
| ASV_16s_2740 | 1.679678685 | 2.747517629  | 3.545105571 | 2.57561022   | 0.921296747 | NA          |
| ASV_16s_2741 | 2.332878383 | -7.3327222   | 2.924828797 | 3.728696076  | 0.81044211  | 1           |
| ASV_16s_2742 | 2.326287609 | 1.676855595  | 3.548041206 | 2.260500052  | 0.944027668 | 1           |
| ASV_16s_2743 | 1.682752279 | -11.05964588 | 3.549256814 | 1.454649981  | NA          | NA          |
| ASV_16s_2744 | 1.444555134 | -0.233462385 | 3.548365928 | 1.994537614  | NA          | NA          |
| ASV_16s_2745 | 1.673058514 | 0.29329631   | 3.548977261 | 3.25085678   | NA          | NA          |
| ASV_16s_2746 | 1.722334054 | 1.083201605  | 3.547061133 | 3.431149564  | 0.84246334  | NA          |
| ASV_16s_2747 | 1.840905082 | -0.62630414  | 3.548058032 | 2.190720596  | 0.948534525 | NA          |
| ASV_16s_2748 | 2.107879511 | 0.734658973  | 1.9495724   | 7.706575266  | 0.359177441 | 1           |
| ASV_16s_2749 | 2.192970397 | -10.68976198 | 3.549444435 | 3.081487316  | 0.877363008 | 1           |
| ASV_16s_2750 | 2.697748961 | 1.130612795  | 3.54930607  | 1.993627552  | 0.960192226 | 1           |
| ASV_16s_2751 | 2.015533877 | -15.18069893 | 3.552157344 | 0.767590068  | 0.997760811 | 1           |



|              |             |              |             |             |             |    |             |
|--------------|-------------|--------------|-------------|-------------|-------------|----|-------------|
| ASV_16s_2752 | 1.730764489 | -0.186164898 | 3.549042499 | 4.060420637 | 0.772792429 | NA |             |
| ASV_16s_2753 | 1.797882551 | -0.087675126 | 3.547188103 | 2.936913839 | 0.890776215 | NA |             |
| ASV_16s_2754 | 2.015399179 | -0.678086947 | 3.157253483 | 3.591952023 | 0.825392242 |    | 1           |
| ASV_16s_2755 | 2.149183926 | -0.278270152 | 2.456103436 | 9.248186866 | 0.235325046 |    | 0.949152858 |
| ASV_16s_2756 | 2.209635435 | -0.008676885 | 3.54945341  | 1.757787774 | 0.972023382 |    | 1           |
| ASV_16s_2757 | 2.013457429 | 0.292774182  | 3.549225603 | 4.386801075 | 0.734301946 |    | 1           |
| ASV_16s_2758 | 2.290730913 | 0.315939099  | 3.550618599 | 2.180424393 | 0.949182887 |    | 1           |
| ASV_16s_2759 | 1.005773636 | 13.10798899  | 3.551629329 | 0.576742682 | 0.999114155 | NA |             |
| ASV_16s_2760 | 1.843746051 | -0.73553887  | 3.548196722 | 2.841582601 | 0.899260136 | NA |             |
| ASV_16s_2761 | 1.807553895 | 0.115919349  | 3.547872703 | 3.917574724 | 0.789220787 | NA |             |
| ASV_16s_2762 | 1.944626331 | -0.733640611 | 2.657707276 | 5.85879427  | 0.556330774 | NA |             |
| ASV_16s_2763 | 2.027738306 | -0.863453617 | 3.546771566 | 2.350715125 | 0.937912814 |    | 1           |
| ASV_16s_2764 | 2.314560764 | -0.479015661 | 3.001500945 | 5.006429398 | 0.659178577 |    | 1           |
| ASV_16s_2765 | 2.074770353 | 1.185986102  | 1.939256311 | 10.79027097 | 0.148032536 |    | 0.681343669 |
| ASV_16s_2766 | 1.386319161 | -3.799165646 | 3.547228731 | 0.280898174 | NA          | NA |             |
| ASV_16s_2767 | 1.646385109 | -0.290251781 | 3.549056143 | 3.161603438 | NA          | NA |             |
| ASV_16s_2768 | 0.753513555 | 17.70195758  | 3.551446413 | 0.02938881  | NA          | NA |             |
| ASV_16s_2769 | 1.644976732 | 1.901246335  | 3.546662538 | 3.042767904 | NA          | NA |             |
| ASV_16s_2770 | 2.029462116 | -0.857945563 | 3.197723521 | 3.110268082 | 0.874617537 |    | 1           |
| ASV_16s_2771 | 2.144042453 | -0.400544809 | 2.256461368 | 6.310977897 | 0.503943236 |    | 1           |
| ASV_16s_2772 | 2.345562327 | 0.476480963  | 3.549739282 | 0.746574046 | NA          | NA |             |
| ASV_16s_2773 | 0.980270616 | -5.618844772 | 3.549496517 | 1.022927474 | NA          | NA |             |
| ASV_16s_2774 | 1.770000696 | -0.757966643 | 3.54878883  | 1.814505076 | 0.969390255 | NA |             |
| ASV_16s_2775 | 1.211086252 | 18.77733539  | 3.54916382  | 0.424511744 | NA          | NA |             |
| ASV_16s_2776 | 2.248147477 | 1.571558086  | 3.548473782 | 2.576632019 | 0.921216911 |    | 1           |
| ASV_16s_2777 | 2.353750237 | 0.541793328  | 3.549310395 | 3.165881746 | 0.869244436 |    | 1           |
| ASV_16s_2778 | 1.757531029 | 1.862394039  | 3.296338146 | 3.69082168  | 0.814620037 | NA |             |
| ASV_16s_2779 | 2.086869179 | -0.796217026 | 3.547884373 | 2.92235341  | 0.892091028 |    | 1           |
| ASV_16s_2780 | 1.907134694 | 0.518101136  | 3.546364933 | 3.026943615 | 0.882498584 | NA |             |
| ASV_16s_2781 | 1.946824536 | -0.360369917 | 2.849041394 | 4.007835848 | 0.778874429 | NA |             |
| ASV_16s_2782 | 2.090830444 | -0.796669304 | 3.547788078 | 2.885948392 | 0.895348612 |    | 1           |
| ASV_16s_2783 | 2.33807094  | 0.867739274  | 3.549489358 | 2.480724532 | 0.928541519 |    | 1           |
| ASV_16s_2784 | 1.845863944 | 0.897404845  | 3.336692212 | 3.345911995 | 0.851266674 | NA |             |
| ASV_16s_2785 | 2.050715493 | 0.613187275  | 3.546603322 | 1.646206038 | 0.97681235  |    | 1           |
| ASV_16s_2786 | 1.421155523 | 19.13198545  | 3.551463117 | 0.930699996 | NA          | NA |             |
| ASV_16s_2787 | 1.822797891 | -0.168046381 | 3.547849827 | 3.613856707 | 0.823022912 | NA |             |
| ASV_16s_2788 | 1.718544514 | 0.685835261  | 3.547527214 | 3.408518659 | 0.844817979 | NA |             |
| ASV_16s_2789 | 2.131873985 | -0.541586953 | 2.846816711 | 4.236956572 | 0.752115942 |    | 1           |
| ASV_16s_2790 | 2.039722527 | -1.021609691 | 3.428449532 | 2.719712835 | 0.909664742 |    | 1           |
| ASV_16s_2791 | 2.389595853 | -0.089978395 | 2.784579624 | 5.270787377 | 0.626955212 |    | 1           |
| ASV_16s_2792 | 0.933020927 | 0.152022773  | 3.548958857 | 2.113375145 | NA          | NA |             |
| ASV_16s_2793 | 1.641753096 | 0.689163932  | 3.54868079  | 3.329431394 | 0.85294793  | NA |             |
| ASV_16s_2794 | 2.277748496 | 0.672967664  | 2.658784263 | 6.780941996 | 0.452039084 |    | 1           |
| ASV_16s_2795 | 2.275870902 | 17.51753037  | 3.550764927 | 0.544612564 | 0.999266178 |    | 1           |
| ASV_16s_2796 | 1.906461874 | 0.097411713  | 3.281211687 | 3.856772225 | 0.796118838 | NA |             |
| ASV_16s_2797 | 2.001968855 | -0.482191208 | 3.260043124 | 4.365482244 | 0.736849025 |    | 1           |
| ASV_16s_2798 | 1.914823733 | -0.782620505 | 2.57926632  | 3.021656146 | 0.882991656 | NA |             |
| ASV_16s_2799 | 2.182773397 | -0.30174197  | 3.262288782 | 4.534886316 | 0.716512402 |    | 1           |
| ASV_16s_2800 | 2.011501518 | -0.53145858  | 2.544203301 | 4.369215217 | 0.736403307 |    | 1           |
| ASV_16s_2801 | 1.794490618 | 3.123980026  | 3.54711325  | 0.747139349 | 0.997946744 | NA |             |
| ASV_16s_2802 | 1.796985614 | 2.768940664  | 3.547560755 | 0.787811824 | NA          | NA |             |
| ASV_16s_2803 | 0.571698912 | -0.683431059 | 3.549514578 | 1.033806071 | NA          | NA |             |
| ASV_16s_2804 | 1.758408626 | 0.408757014  | 3.548762756 | 3.397695535 | 0.8459397   | NA |             |
| ASV_16s_2805 | 1.774951654 | 1.113404435  | 3.433356395 | 2.522222079 | 0.925414445 | NA |             |
| ASV_16s_2806 | 1.866503939 | 0.36516476   | 3.549597336 | 1.402600987 | 0.985491466 | NA |             |
| ASV_16s_2807 | 1.117490745 | -15.31407544 | 3.552157344 | 0.352145515 | 0.999828202 | NA |             |
| ASV_16s_2808 | 1.876385788 | 3.395027371  | 3.546081658 | 0.650986899 | NA          | NA |             |
| ASV_16s_2809 | 2.330292385 | 0.846301138  | 3.474774541 | 2.536133992 | 0.92435165  |    | 1           |
| ASV_16s_2810 | 1.663424517 | 0.141186332  | 3.548411319 | 3.591293646 | NA          | NA |             |
| ASV_16s_2811 | 1.696909071 | -0.932523556 | 3.547369907 | 2.361461901 | 0.937162993 | NA |             |
| ASV_16s_2812 | 1.724314888 | 0.203382802  | 3.546706257 | 3.516380824 | 0.83348741  | NA |             |
| ASV_16s_2813 | 1.851698917 | 0.80725186   | 3.547293717 | 1.884218062 | 0.965969651 | NA |             |
| ASV_16s_2814 | 2.281130314 | 0.917773819  | 3.546499747 | 2.546809968 | NA          | NA |             |
| ASV_16s_2815 | 1.668108851 | -1.107058095 | 2.936242303 | 1.478998112 | 0.98302785  | NA |             |
| ASV_16s_2816 | 1.813079632 | -0.429230304 | 2.740422475 | 5.178200025 | 0.638226732 | NA |             |
| ASV_16s_2817 | 2.104354116 | -0.696865864 | 2.634842035 | 5.895183647 | 0.552040282 |    | 1           |
| ASV_16s_2818 | 1.661492094 | 0.4874961    | 2.368131474 | 1.624878724 | 0.977668908 | NA |             |

|              |             |              |             |              |             |    |             |
|--------------|-------------|--------------|-------------|--------------|-------------|----|-------------|
| ASV_16s_2819 | 1.033933181 | 1.339887112  | 3.549339159 | 1.119169947  | NA          | NA |             |
| ASV_16s_2820 | 2.147205699 | 1.220815088  | 3.549723487 | 2.496351017  | 0.927371586 |    | 1           |
| ASV_16s_2821 | 1.60532427  | -0.298116218 | 3.549060179 | 3.129976343  | NA          | NA |             |
| ASV_16s_2822 | 1.58523713  | 0.829179398  | 3.548585041 | 2.971360132  | NA          | NA |             |
| ASV_16s_2823 | 1.735272516 | 1.12330189   | 3.049402515 | 4.325560825  | 0.741607939 | NA |             |
| ASV_16s_2824 | 1.823969205 | 1.070501629  | 3.547126879 | 3.490081657  | 0.836274904 | NA |             |
| ASV_16s_2825 | 1.928043728 | 5.04E-04     | 2.427893809 | 3.859391138  | 0.795822971 | NA |             |
| ASV_16s_2826 | 1.028674386 | 1.700271496  | 3.548017046 | 1.755143709  | NA          | NA |             |
| ASV_16s_2827 | 0.888516795 | 2.090804841  | 3.548933666 | 0.770020928  | NA          | NA |             |
| ASV_16s_2828 | 1.206195754 | 16.74988576  | 3.551448947 | 0.358608892  | NA          | NA |             |
| ASV_16s_2829 | 1.638158293 | -1.009571109 | 3.54805933  | 1.891869262  | NA          | NA |             |
| ASV_16s_2830 | 2.558490215 | 1.912565547  | 3.547485986 | 2.06894443   | 0.955926006 |    | 1           |
| ASV_16s_2831 | 2.100501865 | -0.071164007 | 3.549985891 | 1.395032986  | 0.985722914 |    | 1           |
| ASV_16s_2832 | 2.200703414 | 0.335691693  | 3.55060355  | 1.670626767  | 0.975808446 |    | 1           |
| ASV_16s_2833 | 1.735970503 | 0.072512409  | 3.548245109 | 3.514693977  | 0.833666671 | NA |             |
| ASV_16s_2834 | 1.827931497 | 0.018231148  | 2.559234449 | 6.170314312  | 0.520009535 | NA |             |
| ASV_16s_2835 | 1.769671793 | 0.014328556  | 2.88835438  | 4.300632562  | 0.744572124 | NA |             |
| ASV_16s_2836 | 1.318043841 | 0.943385088  | 3.550036281 | 1.227224532  | 0.99028649  | NA |             |
| ASV_16s_2837 | 2.303016806 | -2.872365248 | 3.548786984 | 2.827074966  | 0.900525087 |    | 1           |
| ASV_16s_2838 | 1.729464749 | 0.607205521  | 3.546749711 | 3.194989749  | 0.866397207 | NA |             |
| ASV_16s_2839 | 2.191879594 | 1.342551664  | 3.549056992 | 1.4252257    | NA          | NA |             |
| ASV_16s_2840 | 2.272181189 | 0.574452339  | 1.648522229 | 15.85467825  | 0.026477714 |    | 0.192609753 |
| ASV_16s_2841 | 1.852725437 | 0.431208704  | 3.549314798 | 2.801826454  | 0.902709761 | NA |             |
| ASV_16s_2842 | 2.247081752 | 0.363382922  | 3.549913984 | 1.748340824  | 0.972448913 |    | 1           |
| ASV_16s_2843 | 1.714677457 | 0.112884664  | 3.548205479 | 3.554124783  | 0.829459841 | NA |             |
| ASV_16s_2844 | 1.673298213 | 1.408220376  | 3.546626701 | 3.222249375  | 0.863709455 | NA |             |
| ASV_16s_2845 | 1.686880407 | 0.867723025  | 3.547818295 | 3.370693308  | 0.848725732 | NA |             |
| ASV_16s_2846 | 1.815464031 | -0.316979282 | 3.547022229 | 3.296002287  | 0.856336791 | NA |             |
| ASV_16s_2847 | 1.831354589 | 3.08295936   | 3.36452732  | 2.753474237  | 0.906833233 | NA |             |
| ASV_16s_2848 | 1.630031751 | 0.431269845  | 3.548787539 | 3.29792331   | 0.856142832 | NA |             |
| ASV_16s_2849 | 1.69885662  | 0.134794816  | 3.548004629 | 3.723260245  | 0.811043421 | NA |             |
| ASV_16s_2850 | 1.973402844 | -2.342676041 | 3.544899006 | 2.018117594  | 0.958830793 | NA |             |
| ASV_16s_2851 | 1.673266618 | -0.939149282 | 3.54702938  | 2.222742113  | 0.946490686 | NA |             |
| ASV_16s_2852 | 1.735696069 | -1.236836109 | 2.94983622  | 2.846377084  | 0.898840556 | NA |             |
| ASV_16s_2853 | 1.81520406  | 2.675700306  | 3.547652779 | 0.839650811  | NA          | NA |             |
| ASV_16s_2854 | 2.193923704 | 1.605075653  | 2.926002266 | 3.06802761   | 0.878638583 |    | 1           |
| ASV_16s_2855 | 2.150020141 | 0.50599454   | 2.748706505 | 6.397326671  | 0.49419501  |    | 1           |
| ASV_16s_2856 | 2.132264915 | 0.676874035  | 3.550589347 | 2.779285362  | 0.904641985 |    | 1           |
| ASV_16s_2857 | 0.557114756 | -0.683340724 | 3.549534949 | 1.025474759  | NA          | NA |             |
| ASV_16s_2858 | 0.557114756 | -0.683340724 | 3.549534949 | 1.025474759  | NA          | NA |             |
| ASV_16s_2859 | 1.729509472 | -0.264568684 | 3.547581945 | 3.479573369  | 0.837384291 | NA |             |
| ASV_16s_2860 | 1.722633344 | -0.003709368 | 3.546809164 | 3.636822156  | NA          | NA |             |
| ASV_16s_2861 | 2.215827305 | 0.315939155  | 3.550619662 | 2.16345683   | 0.950241962 |    | 1           |
| ASV_16s_2862 | 1.692833322 | -0.186146378 | 3.5480028   | 3.241356666  | 0.861813396 | NA |             |
| ASV_16s_2863 | 1.659667142 | 1.683863065  | 3.5467725   | 3.127688657  | NA          | NA |             |
| ASV_16s_2864 | 1.935649893 | 0.588315145  | 3.003450861 | 5.229620884  | 0.631964005 | NA |             |
| ASV_16s_2865 | 2.059998894 | -0.946392635 | 2.527910048 | 3.507915278  | 0.834386395 |    | 1           |
| ASV_16s_2866 | 2.019282676 | -0.13478062  | 2.742317534 | 6.917826262  | 0.437485687 |    | 1           |
| ASV_16s_2867 | 1.700799042 | -0.83460881  | 3.546779787 | 2.667125575  | 0.913995686 | NA |             |
| ASV_16s_2868 | 2.24087509  | 0.471031113  | 3.549729876 | 0.755013121  | NA          | NA |             |
| ASV_16s_2869 | 1.744340107 | -1.45271856  | 3.547812195 | 0.903291576  | NA          | NA |             |
| ASV_16s_2870 | 1.298417255 | -1.722338263 | 3.548249466 | 0.785031991  | NA          | NA |             |
| ASV_16s_2871 | 0.554197925 | -0.683321177 | 3.54953915  | 1.023782314  | NA          | NA |             |
| ASV_16s_2872 | 1.668874511 | 0.071144134  | 3.54792416  | 3.724912057  | 0.810860757 | NA |             |
| ASV_16s_2873 | 1.685445116 | 0.250336523  | 3.54789451  | 3.312640168  | 0.854653739 | NA |             |
| ASV_16s_2874 | 1.802861454 | 0.112856311  | 3.547766445 | 4.177692998  | 0.759098336 | NA |             |
| ASV_16s_2875 | 2.261749588 | 4.885533399  | 1.996971231 | 2.762486228  | 0.906070751 |    | 1           |
| ASV_16s_2876 | 2.132514112 | 0.364915858  | 3.550520455 | 1.382198115  | 0.986110289 |    | 1           |
| ASV_16s_2877 | 0.520153375 | -6.731656836 | 3.552157344 | -0.116407699 | NA          | NA |             |
| ASV_16s_2878 | 1.675216416 | -0.183373096 | 3.547847841 | 3.386095034  | 0.847138814 | NA |             |
| ASV_16s_2879 | 1.661743348 | 0.469626568  | 3.547595592 | 3.27532723   | 0.858418161 | NA |             |
| ASV_16s_2880 | 1.760363605 | 0.210687353  | 3.259319336 | 3.804213144  | 0.802031933 | NA |             |
| ASV_16s_2881 | 1.607068168 | 0.150130297  | 3.547914619 | 3.791179133  | 0.803490874 | NA |             |
| ASV_16s_2882 | 2.167955552 | -0.517786955 | 3.406790992 | 2.825148537  | 0.900692528 |    | 1           |
| ASV_16s_2883 | 2.027343796 | 0.777809135  | 3.549088784 | 3.226897043  | NA          | NA |             |
| ASV_16s_2884 | 1.568371598 | 0.121984539  | 2.739882435 | 1.904431585  | 0.964939859 | NA |             |
| ASV_16s_2885 | 2.24332087  | 11.68268911  | 3.549386047 | 1.445191845  | 0.984146698 |    | 1           |

|              |             |              |             |              |             |    |   |
|--------------|-------------|--------------|-------------|--------------|-------------|----|---|
| ASV_16s_2886 | 1.568815929 | -0.317062283 | 3.549061873 | 3.088666535  | NA          | NA |   |
| ASV_16s_2887 | 0.557220725 | 0.077550296  | 3.550578851 | 3.130511061  | NA          | NA |   |
| ASV_16s_2889 | 1.897243916 | -0.814202202 | 3.547985902 | 2.719897881  | 0.90964933  | NA |   |
| ASV_16s_2890 | 1.656051514 | 0.754468828  | 3.547581907 | 3.520341526  | 0.833066258 | NA |   |
| ASV_16s_2891 | 1.759762773 | -0.972611565 | 3.546984197 | 3.121805915  | 0.873510122 | NA |   |
| ASV_16s_2892 | 1.942032984 | -0.464295029 | 2.081220925 | 10.50838921  | 0.161546672 | NA |   |
| ASV_16s_2893 | 2.022012724 | -0.264565058 | 2.510104609 | 4.234664312  | 0.75238673  |    | 1 |
| ASV_16s_2894 | 1.768287423 | -0.930301367 | 2.81888875  | 3.666152835  | 0.817326274 | NA |   |
| ASV_16s_2895 | 1.970266949 | 0.732273097  | 3.549100148 | 3.153210834  | NA          | NA |   |
| ASV_16s_2896 | 1.735211067 | 2.134263532  | 3.548316085 | 0.857225243  | NA          | NA |   |
| ASV_16s_2897 | 2.09290067  | 0.854438267  | 3.486184207 | 3.685287941  | 0.815228144 |    | 1 |
| ASV_16s_2898 | 2.089169713 | 0.53326284   | 3.377933471 | 4.500166999  | 0.720697164 |    | 1 |
| ASV_16s_2899 | 2.14969086  | 0.694069543  | 3.550586805 | 2.082361029  | 0.955141447 |    | 1 |
| ASV_16s_2900 | 1.985901656 | -0.842903006 | 3.240644067 | 2.686694209  | 0.912395469 | NA |   |
| ASV_16s_2901 | 2.167083776 | -0.127743868 | 3.549675634 | 1.576702964  | 0.979534785 |    | 1 |
| ASV_16s_2902 | 2.24965073  | 0.784951513  | 3.549339039 | 2.836401803  | 0.899712665 |    | 1 |
| ASV_16s_2903 | 2.046310895 | -0.905021762 | 3.547452196 | 2.509494385  | 0.926380433 |    | 1 |
| ASV_16s_2904 | 1.95058071  | 0.630204347  | 2.99894681  | 5.21553694   | 0.633678699 | NA |   |
| ASV_16s_2905 | 1.742213042 | -1.076117328 | 3.547349328 | 2.128557282  | 0.952383446 | NA |   |
| ASV_16s_2906 | 2.068306342 | -0.045870475 | 2.993954345 | 2.254238526  | 0.944440073 |    | 1 |
| ASV_16s_2907 | 1.748308464 | -1.115626152 | 3.547607699 | 2.46191389   | 0.929937577 | NA |   |
| ASV_16s_2908 | 1.688423472 | -0.077312634 | 3.549608658 | 2.369758727  | 0.93658102  | NA |   |
| ASV_16s_2909 | 2.622307001 | -0.444430956 | 3.547930021 | 1.766586748  | NA          | NA |   |
| ASV_16s_2910 | 1.94268559  | 0.190166045  | 2.936557437 | 3.770425321  | 0.805807653 | NA |   |
| ASV_16s_2911 | 2.37470857  | 0.088124719  | 3.549255821 | 5.195977496  | 0.636060846 |    | 1 |
| ASV_16s_2912 | 1.759355166 | 0.026231831  | 3.546810211 | 3.169349795  | 0.868906452 | NA |   |
| ASV_16s_2913 | 1.647239832 | 0.569594333  | 3.33233516  | 2.723401665  | 0.909357293 | NA |   |
| ASV_16s_2914 | 2.071638984 | -1.006269897 | 2.842278882 | 3.098085064  | 0.875782671 |    | 1 |
| ASV_16s_2915 | 1.980226335 | -0.142140827 | 3.546892138 | 4.049778379  | 0.774026393 | NA |   |
| ASV_16s_2916 | 1.867484253 | 2.10346165   | 2.723329774 | 4.169646853  | 0.760043269 | NA |   |
| ASV_16s_2917 | 1.937169879 | 2.372865831  | 3.545583385 | 2.297280676  | NA          | NA |   |
| ASV_16s_2918 | 2.02802543  | 1.106263275  | 3.547136166 | 2.279970574  | 0.942735266 |    | 1 |
| ASV_16s_2919 | 1.70872372  | 0.068203959  | 3.547930682 | 3.733784613  | 0.809878711 | NA |   |
| ASV_16s_2920 | 1.598889361 | 0.010042773  | 3.547974535 | 3.554137304  | 0.8294585   | NA |   |
| ASV_16s_2921 | 2.040321128 | -0.638019608 | 2.797931403 | 2.928799859  | 0.891509745 |    | 1 |
| ASV_16s_2922 | 1.081132226 | 0.198964002  | 3.550557807 | 0.925892102  | 0.995937088 | NA |   |
| ASV_16s_2923 | 1.059374622 | 0.323322579  | 3.549813408 | 1.254503949  | NA          | NA |   |
| ASV_16s_2924 | 2.155203134 | 0.542831141  | 2.972246141 | 2.657411677  | 0.914784978 |    | 1 |
| ASV_16s_2925 | 0.631700451 | -0.458833771 | 3.550741474 | 0.959161137  | NA          | NA |   |
| ASV_16s_2926 | 0.516695989 | -22.05679878 | 3.551441403 | -0.131697345 | NA          | NA |   |
| ASV_16s_2927 | 1.587445862 | -0.034419667 | 3.548001139 | 3.435195053  | 0.842041134 | NA |   |
| ASV_16s_2928 | 1.706138472 | 0.013845927  | 3.547815269 | 3.885714912  | 0.792842778 | NA |   |
| ASV_16s_2929 | 1.662824771 | -0.035910955 | 3.54706427  | 3.086180274  | 0.876916996 | NA |   |
| ASV_16s_2930 | 1.679070187 | -0.747213802 | 2.89130038  | 3.465945424  | 0.838819236 | NA |   |
| ASV_16s_2931 | 1.98039641  | -0.318707849 | 3.524005759 | 2.053162909  | 0.956839358 | NA |   |
| ASV_16s_2932 | 1.78221537  | 1.802355806  | 2.637613537 | 4.508302831  | 0.719717243 | NA |   |
| ASV_16s_2933 | 2.727195631 | -0.104797432 | 3.546295784 | 2.595976222  | 0.919698257 |    | 1 |
| ASV_16s_2934 | 2.469471247 | 3.22479063   | 3.548560235 | 1.589503725  | 0.979048309 |    | 1 |
| ASV_16s_2935 | 1.685011014 | 0.078484118  | 3.547628414 | 3.072450288  | 0.878220039 | NA |   |
| ASV_16s_2936 | 1.762135653 | 0.207145972  | 3.545907184 | 3.221436875  | 0.863789861 | NA |   |
| ASV_16s_2937 | 2.113513401 | -0.160282843 | 2.969609618 | 3.086017283  | 0.876932497 |    | 1 |
| ASV_16s_2938 | 2.057246853 | 1.157645099  | 3.549867981 | 2.413292712  | 0.93348348  |    | 1 |
| ASV_16s_2939 | 2.299917678 | 14.93081934  | 3.551466217 | 2.399575338  | 0.934467432 |    | 1 |
| ASV_16s_2941 | 1.989395483 | 0.804904876  | 2.76184764  | 4.358675992  | 0.737661382 | NA |   |
| ASV_16s_2942 | 0.565207605 | 0.121331555  | 3.550587628 | 3.189789267  | 0.866907634 | NA |   |
| ASV_16s_2943 | 1.580381358 | 0.477271868  | 3.547943537 | 3.477907792  | 0.837559897 | NA |   |
| ASV_16s_2944 | 1.538256215 | 0.629253962  | 3.547520028 | 2.907046853  | NA          | NA |   |
| ASV_16s_2945 | 1.054839096 | -14.13761417 | 3.552157344 | 0.316750183  | 0.999879791 | NA |   |
| ASV_16s_2946 | 1.103957728 | 3.077408245  | 3.54724175  | 0.639386343  | NA          | NA |   |
| ASV_16s_2947 | 2.115414239 | 0.167641328  | 2.151846995 | 6.446146272  | 0.488723845 |    | 1 |
| ASV_16s_2948 | 2.512197672 | -4.26417062  | 3.544132122 | 0.371625123  | NA          | NA |   |
| ASV_16s_2949 | 2.016244018 | -0.101795356 | 3.549485477 | 1.999007357  | 0.959895289 |    | 1 |
| ASV_16s_2950 | 2.153743534 | 0.190081389  | 3.044791605 | 6.245169552  | 0.511431743 |    | 1 |
| ASV_16s_2951 | 1.725899809 | 2.039530629  | 2.593061362 | 5.294088385  | 0.624122439 | NA |   |
| ASV_16s_2952 | 2.169785361 | -9.307056994 | 3.54812928  | 1.902097118  | 0.965059661 |    | 1 |
| ASV_16s_2953 | 1.582379643 | 0.880190495  | 2.531253025 | 3.710130211  | 0.81249355  | NA |   |
| ASV_16s_2954 | 1.297837825 | 0.321849452  | 3.131359843 | 2.914567653  | 0.892791302 | NA |   |

|              |             |              |             |             |             |    |   |
|--------------|-------------|--------------|-------------|-------------|-------------|----|---|
| ASV_16s_2955 | 1.520021021 | -0.784074315 | 3.547417087 | 3.235837805 | 0.862362062 | NA |   |
| ASV_16s_2956 | 2.175915511 | 1.942548229  | 2.860227623 | 1.992162117 | 0.960272902 |    | 1 |
| ASV_16s_2957 | 2.20165563  | 0.34644163   | 3.548248204 | 2.918331135 | 0.892453046 |    | 1 |
| ASV_16s_2958 | 2.539476646 | 0.405880933  | 3.54833301  | 3.219502669 | 0.8639812   |    | 1 |
| ASV_16s_2959 | 1.903918194 | -0.808696949 | 3.158722113 | 3.594461002 | 0.825121368 | NA |   |
| ASV_16s_2960 | 1.925907573 | 0.674482813  | 3.012206299 | 5.20136676  | 0.635404396 | NA |   |
| ASV_16s_2961 | 1.676298204 | -0.788448015 | 3.54758188  | 2.077457857 | 0.955429028 | NA |   |
| ASV_16s_2962 | 1.741963568 | -28.6867756  | 3.551464425 | 1.4442802   | 0.984176237 | NA |   |
| ASV_16s_2963 | 2.208511533 | -0.250273316 | 3.548430345 | 2.22234466  | 0.946516308 |    | 1 |
| ASV_16s_2964 | 1.689965187 | 0.442966876  | 3.549817093 | 0.790672532 | NA          | NA |   |
| ASV_16s_2965 | 1.164469104 | 17.99643635  | 3.551443371 | 0.296105884 | NA          | NA |   |
| ASV_16s_2966 | 2.030086491 | 30           | 3.549346468 | 1.313504618 | 0.988074538 |    | 1 |
| ASV_16s_2967 | 2.021143455 | 0.360091463  | 3.550227352 | 1.752768115 | 0.972249952 |    | 1 |
| ASV_16s_2968 | 0.970493068 | -13.36093282 | 3.552157344 | 0.265654363 | NA          | NA |   |
| ASV_16s_2969 | 2.471671088 | -1.66928837  | 3.54556427  | 1.797487285 | 0.970194423 |    | 1 |
| ASV_16s_2970 | 1.827269981 | -0.092431061 | 2.839336498 | 2.833217169 | 0.899990391 | NA |   |
| ASV_16s_2971 | 1.820258132 | -0.794772648 | 3.548194711 | 2.801311962 | 0.902754055 | NA |   |
| ASV_16s_2972 | 1.658560825 | -0.990728912 | 3.548964077 | 1.652126207 | 0.976571247 | NA |   |
| ASV_16s_2973 | 3.323577734 | -0.568886625 | 3.548802233 | 1.578880325 | NA          | NA |   |
| ASV_16s_2974 | 2.016371595 | -0.63082429  | 3.548953175 | 2.120289021 | 0.952883507 |    | 1 |
| ASV_16s_2975 | 2.27203448  | 0.390595544  | 3.550174601 | 1.091534575 | 0.993213801 |    | 1 |
| ASV_16s_2976 | 2.049848177 | 0.694064152  | 3.550588489 | 2.05810797  | 0.956554269 |    | 1 |
| ASV_16s_2977 | 1.955019964 | -0.796663084 | 3.54779574  | 2.805672889 | 0.902378325 | NA |   |
| ASV_16s_2978 | 1.895544656 | -0.796382897 | 3.547851749 | 2.814532819 | 0.901612996 | NA |   |
| ASV_16s_2979 | 2.138004455 | 0.641724933  | 3.163764344 | 3.685328503 | 0.815223689 |    | 1 |
| ASV_16s_2980 | 1.549785578 | -21.65883452 | 3.550765155 | 1.800122686 | 0.97007068  | NA |   |
| ASV_16s_2981 | 2.251841625 | 0.534187528  | 3.54800764  | 4.19456916  | 0.757113991 |    | 1 |
| ASV_16s_2982 | 2.178432365 | 0.915230425  | 3.549598572 | 3.671728799 | 0.816715627 |    | 1 |
| ASV_16s_2983 | 1.659957876 | -0.151598757 | 3.547864284 | 3.395399188 | 0.846177329 | NA |   |
| ASV_16s_2984 | 1.684973444 | 0.602385936  | 3.546937063 | 3.678332585 | 0.815991622 | NA |   |
| ASV_16s_2985 | 2.067600304 | 0.412091092  | 2.87934733  | 3.719499856 | 0.811459068 |    | 1 |
| ASV_16s_2986 | 1.979682246 | -0.922292921 | 2.975299747 | 3.179278718 | 0.867936943 | NA |   |
| ASV_16s_2987 | 2.046928817 | 0.360860615  | 3.55056082  | 1.404557381 | 0.985431267 |    | 1 |
| ASV_16s_2988 | 1.131777507 | 16.70476362  | 3.551449695 | 0.319530342 | NA          | NA |   |
| ASV_16s_2989 | 1.636643027 | -0.310935812 | 3.54905346  | 3.13680947  | 0.872064308 | NA |   |
| ASV_16s_2990 | 1.54082004  | -0.32436862  | 3.549064785 | 3.062728313 | 0.879139318 | NA |   |
| ASV_16s_2991 | 1.700898148 | 1.106960842  | 3.547056313 | 3.487270999 | 0.83657188  | NA |   |
| ASV_16s_2992 | 1.528951606 | 2.361795352  | 3.312959966 | 3.32915935  | 0.852975624 | NA |   |
| ASV_16s_2993 | 1.943703606 | -0.798787149 | 3.157913173 | 3.561704766 | 0.828647227 | NA |   |
| ASV_16s_2994 | 1.872148431 | -0.795945687 | 3.547950255 | 2.832124161 | 0.900085633 | NA |   |
| ASV_16s_2995 | 1.685514161 | -0.787054897 | 3.549243556 | 1.158660657 | NA          | NA |   |
| ASV_16s_2996 | 2.008069804 | -0.926569405 | 2.99223949  | 3.18027328  | 0.867839677 |    | 1 |
| ASV_16s_2997 | 1.195944984 | 1.340174858  | 3.549275415 | 1.166095025 | NA          | NA |   |
| ASV_16s_2998 | 1.68661958  | -0.100280487 | 3.549086965 | 3.166532396 | NA          | NA |   |
| ASV_16s_2999 | 0.52940486  | -0.683153168 | 3.549576723 | 1.009027868 | NA          | NA |   |
| ASV_16s_3000 | 0.082950566 | 0.9897469    | 3.551294495 | 0.134065902 | 0.999993636 | NA |   |
| ASV_16s_3001 | 1.586227832 | 0.011470143  | 3.548403071 | 3.038930304 | 0.881377644 | NA |   |
| ASV_16s_3002 | 1.643246638 | 1.211709976  | 3.271373948 | 3.866845727 | 0.794980176 | NA |   |
| ASV_16s_3003 | 1.645954572 | 0.128692554  | 3.546228976 | 1.747644743 | NA          | NA |   |
| ASV_16s_3004 | 1.530575458 | -21.94646587 | 3.550805903 | 1.873008945 | NA          | NA |   |
| ASV_16s_3005 | 0.753837748 | 17.1930874   | 3.550786232 | 0.416929325 | NA          | NA |   |
| ASV_16s_3006 | 1.540729909 | 1.155030445  | 3.547203993 | 3.2376901   | NA          | NA |   |
| ASV_16s_3007 | 1.924754813 | -0.796740556 | 3.547784163 | 2.76389437  | 0.90595136  | NA |   |
| ASV_16s_3008 | 1.907585069 | -0.821393963 | 3.547759774 | 2.264571076 | 0.943758695 | NA |   |
| ASV_16s_3009 | 1.983103024 | -0.64725706  | 3.54959116  | 1.555332736 | 0.98033198  | NA |   |
| ASV_16s_3010 | 2.005163634 | 0.239452907  | 2.474152139 | 2.825703788 | 0.90064428  |    | 1 |
| ASV_16s_3011 | 1.088826669 | 19.91222233  | 3.551437823 | 0.195262535 | 0.999976826 | NA |   |
| ASV_16s_3012 | 1.7851589   | 0.748834363  | 2.983624826 | 5.743845207 | 0.569957265 | NA |   |
| ASV_16s_3013 | 1.981738252 | 0.271434828  | 3.549208206 | 1.41509366  | NA          | NA |   |
| ASV_16s_3014 | 1.940057831 | 0.403731498  | 3.549232818 | 1.411113913 | NA          | NA |   |
| ASV_16s_3015 | 2.549761078 | -0.568734445 | 3.548839466 | 1.493328308 | 0.982539735 |    | 1 |
| ASV_16s_3016 | 0.526488028 | -0.683132336 | 3.549581375 | 1.00724695  | NA          | NA |   |
| ASV_16s_3017 | 1.766650316 | -0.469755391 | 3.547828476 | 2.617032441 | 0.91802967  | NA |   |
| ASV_16s_3018 | 1.6038228   | 0.812321611  | 3.547282806 | 3.454725381 | 0.839997401 | NA |   |
| ASV_16s_3019 | 1.432010651 | 2.067221961  | 3.108934754 | 3.552040753 | 0.829683041 | NA |   |
| ASV_16s_3020 | 1.862216823 | -0.469192072 | 3.084986604 | 3.28183306  | 0.857764427 | NA |   |
| ASV_16s_3021 | 1.828574592 | -0.794731092 | 3.548203502 | 2.803672085 | 0.902550791 | NA |   |

|              |             |              |             |             |             |    |   |
|--------------|-------------|--------------|-------------|-------------|-------------|----|---|
| ASV_16s_3022 | 1.521031597 | -2.388373776 | 3.546092347 | 0.673060573 | 0.998534272 | NA |   |
| ASV_16s_3023 | 0.440599488 | 0.304772593  | 3.550781734 | 0.967227131 | NA          | NA |   |
| ASV_16s_3024 | 2.100489311 | 0.566866497  | 3.515814983 | 3.34652996  | 0.851203498 |    | 1 |
| ASV_16s_3025 | 1.52432291  | 1.064706315  | 3.547512607 | 3.152436814 | 0.870551518 | NA |   |
| ASV_16s_3026 | 1.725215848 | -0.345920555 | 3.546814895 | 3.476605967 | 0.837697107 | NA |   |
| ASV_16s_3027 | 1.878173332 | 0.242050188  | 3.423507194 | 2.051694096 | 0.956923842 | NA |   |
| ASV_16s_3028 | 2.460291091 | 0.271425142  | 3.549149206 | 1.484898654 | NA          | NA |   |
| ASV_16s_3029 | 1.026058465 | -14.14664638 | 3.552157344 | 0.299780817 | 0.99990021  | NA |   |
| ASV_16s_3030 | 2.080166633 | -0.738708604 | 3.299735202 | 2.617671172 | NA          | NA |   |
| ASV_16s_3031 | 1.9955347   | 1.206795387  | 3.549053204 | 1.383849192 | NA          | NA |   |
| ASV_16s_3032 | 0.470238381 | -0.607348248 | 3.550049551 | 0.960095227 | NA          | NA |   |
| ASV_16s_3033 | 2.031381091 | 0.347197408  | 3.550393294 | 1.506264358 | 0.982091995 |    | 1 |
| ASV_16s_3034 | 2.20501949  | 11.65017505  | 3.549408172 | 1.296121577 | 0.988542792 |    | 1 |
| ASV_16s_3035 | 1.578191377 | -0.285654841 | 3.549066548 | 3.123355849 | 0.873361064 | NA |   |
| ASV_16s_3036 | 1.657045051 | 2.083602352  | 3.545885419 | 2.957024312 | 0.888949156 | NA |   |
| ASV_16s_3037 | 1.510293045 | -0.762223408 | 2.926581353 | 3.531850903 | 0.831840447 | NA |   |
| ASV_16s_3038 | 1.910375013 | -0.559219751 | 2.783926333 | 2.286749239 | 0.94228177  | NA |   |
| ASV_16s_3039 | 1.405278952 | -0.199752519 | 3.549509855 | 0.996710187 | 0.994881431 | NA |   |
| ASV_16s_3040 | 1.647497277 | 3.037290367  | 3.546728076 | 0.638373855 | NA          | NA |   |
| ASV_16s_3041 | 2.015204482 | 0.366266781  | 3.550562744 | 1.187229339 | 0.991217973 |    | 1 |
| ASV_16s_3042 | 0.749304202 | -21.14169403 | 3.551447985 | 1.100580768 | 0.993038871 | NA |   |
| ASV_16s_3043 | 1.558815966 | 1.430173474  | 3.547203274 | 3.091862527 | NA          | NA |   |
| ASV_16s_3044 | 1.562742308 | 1.263724367  | 3.547232975 | 3.239362426 | 0.862011751 | NA |   |
| ASV_16s_3045 | 1.614740059 | 0.496296612  | 3.546638392 | 3.410881605 | 0.844572702 | NA |   |
| ASV_16s_3046 | 2.529747673 | 0.41942877   | 3.549109165 | 1.427142166 | NA          | NA |   |
| ASV_16s_3047 | 1.065032036 | -20.52521977 | 3.551062583 | 0.429706937 | 0.999665344 | NA |   |
| ASV_16s_3048 | 1.165474565 | -8.102912235 | 3.549920833 | 0.48032777  | NA          | NA |   |
| ASV_16s_3049 | 1.572912068 | 0.566515634  | 3.547867734 | 3.339307783 | 0.851941226 | NA |   |
| ASV_16s_3050 | 1.61296355  | 0.518485258  | 3.547006161 | 3.479287314 | 0.837414455 | NA |   |
| ASV_16s_3051 | 1.67293708  | 0.462164145  | 3.545733573 | 3.121799615 | NA          | NA |   |
| ASV_16s_3052 | 1.783201141 | -0.255837705 | 2.887602278 | 4.170899992 | 0.75989615  | NA |   |
| ASV_16s_3053 | 1.791427895 | -0.827545906 | 3.54782532  | 1.960556614 | 0.961991144 | NA |   |
| ASV_16s_3054 | 2.037983798 | 0.715817654  | 3.546632629 | 3.464223998 | 0.839000185 |    | 1 |
| ASV_16s_3055 | 2.074114501 | 4.520361099  | 2.801285619 | 0.479548631 | 0.999517974 |    | 1 |
| ASV_16s_3056 | 1.532261773 | 1.714918943  | 3.546592596 | 2.850092537 | 0.898514882 | NA |   |
| ASV_16s_3057 | 1.794152327 | -0.614012381 | 3.17923459  | 3.351103629 | 0.850735628 | NA |   |
| ASV_16s_3058 | 1.913356034 | -0.798189904 | 3.159781951 | 3.586579194 | 0.825971853 | NA |   |
| ASV_16s_3059 | 1.685505317 | -0.613762785 | 3.547296506 | 2.293394176 | 0.941835447 | NA |   |
| ASV_16s_3060 | 1.976841965 | -0.55494158  | 3.549126652 | 1.554921323 | 0.980347144 | NA |   |
| ASV_16s_3061 | 2.100391359 | 0.939766365  | 3.060727535 | 4.11207568  | 0.76678181  |    | 1 |
| ASV_16s_3062 | 1.855035253 | -0.746113647 | 3.002045971 | 3.336052999 | 0.852273261 | NA |   |
| ASV_16s_3063 | 1.80124477  | -0.683340538 | 3.547888041 | 2.753496918 | 0.906831318 | NA |   |
| ASV_16s_3064 | 1.363173918 | -8.8384758   | 3.547203165 | 0.462294905 | NA          | NA |   |
| ASV_16s_3065 | 2.034134706 | 17.40639512  | 3.551443369 | 0.673698506 | 0.998529764 |    | 1 |
| ASV_16s_3066 | 1.813936799 | -0.796121326 | 3.547914479 | 2.794322797 | 0.903354888 | NA |   |
| ASV_16s_3067 | 1.675179212 | 2.278074559  | 3.54745075  | 1.701527886 | NA          | NA |   |
| ASV_16s_3068 | 0.497774081 | -0.815529774 | 3.549322601 | 1.183258443 | 0.991307273 | NA |   |
| ASV_16s_3069 | 2.061286244 | -0.091270093 | 3.549097768 | 1.328001176 | 0.987675199 |    | 1 |
| ASV_16s_3070 | 1.996567318 | 0.694056789  | 3.550589457 | 2.044669724 | 0.957326643 |    | 1 |
| ASV_16s_3071 | 1.475206377 | 0.080043212  | 3.548104353 | 3.467497077 | NA          | NA |   |
| ASV_16s_3072 | 1.564747105 | 1.77049795   | 3.545911263 | 2.653674313 | 0.915087755 | NA |   |
| ASV_16s_3073 | 1.879666034 | -0.927204963 | 3.22254005  | 2.859665696 | 0.897673653 | NA |   |
| ASV_16s_3074 | 1.681978332 | 0.17670696   | 3.548073804 | 2.59852947  | 0.919496786 | NA |   |
| ASV_16s_3075 | 2.000528747 | -0.078114433 | 3.540981509 | 2.120775402 | 0.952854168 |    | 1 |
| ASV_16s_3076 | 1.866349958 | 3.011446872  | 2.643808415 | 2.545734147 | 0.923614045 | NA |   |
| ASV_16s_3077 | 2.031199953 | 0.694062553  | 3.550588823 | 2.053435648 | 0.956823661 |    | 1 |
| ASV_16s_3078 | 1.608901663 | 2.985294286  | 3.5443302   | 2.495522779 | 0.927433827 | NA |   |
| ASV_16s_3079 | 1.245010984 | 0.943194883  | 3.548248246 | 2.206400843 | NA          | NA |   |
| ASV_16s_3080 | 1.006580603 | -7.396857267 | 3.552157344 | 0.288030615 | 0.999912847 | NA |   |
| ASV_16s_3081 | 2.008700534 | -0.386810952 | 2.890961162 | 4.606985172 | 0.707799099 |    | 1 |
| ASV_16s_3082 | 2.146282376 | -7.179981949 | 3.550176968 | 2.4939336   | 0.927553178 |    | 1 |
| ASV_16s_3083 | 1.479749853 | 0.834146366  | 3.548018139 | 3.311487894 | NA          | NA |   |
| ASV_16s_3084 | 1.524903541 | 0.266796786  | 3.54786256  | 3.647241924 | 0.819392658 | NA |   |
| ASV_16s_3085 | 1.793311695 | -0.757314203 | 2.681102819 | 4.376962632 | 0.73547788  | NA |   |
| ASV_16s_3086 | 1.733947166 | -2.309889418 | 3.486782202 | 1.120983356 | 0.99263394  | NA |   |
| ASV_16s_3087 | 1.578271187 | -0.104296854 | 3.549298407 | 2.673723749 | 0.913457642 | NA |   |
| ASV_16s_3088 | 1.605928649 | 3.278115795  | 2.874339165 | 1.967199664 | 0.961633441 | NA |   |

|              |             |              |             |              |             |    |   |
|--------------|-------------|--------------|-------------|--------------|-------------|----|---|
| ASV_16s_3089 | 1.695303449 | 2.450261438  | 2.952546035 | 2.531519315  | 0.924704986 | NA |   |
| ASV_16s_3090 | 1.196654923 | 0.163088102  | 3.550597426 | 1.114921985  | 0.992755752 | NA |   |
| ASV_16s_3091 | 2.15656422  | 4.073568607  | 3.550875035 | 3.226966995  | 0.863242238 |    | 1 |
| ASV_16s_3092 | 1.781937236 | -12.33883593 | 3.552157344 | 0.571765219  | 0.999138981 | NA |   |
| ASV_16s_3093 | 0.510445457 | -0.68301037  | 3.549607899 | 0.997272381  | NA          | NA |   |
| ASV_16s_3094 | 2.045173219 | 3.771841117  | 2.69773242  | 2.264359443  | 0.943772694 |    | 1 |
| ASV_16s_3095 | 1.916045271 | 0.271436519  | 3.549218605 | 1.404207473  | NA          | NA |   |
| ASV_16s_3096 | 0.427174019 | 0.303290713  | 3.550823925 | 0.956900874  | NA          | NA |   |
| ASV_16s_3097 | 2.037207184 | 1.517742671  | 3.549450143 | 1.683988333  | 0.975248707 |    | 1 |
| ASV_16s_3098 | 1.635087785 | -0.29913899  | 3.547479658 | 3.52315138   | 0.832767265 | NA |   |
| ASV_16s_3099 | 1.799596272 | 2.486910865  | 3.546749355 | 0.698601645  | 0.998346458 | NA |   |
| ASV_16s_3100 | 1.845969644 | -0.798731098 | 3.171853885 | 3.43274898   | 0.842296464 | NA |   |
| ASV_16s_3101 | 1.777209986 | 0.371529008  | 2.335140308 | 7.566161469  | 0.372397237 | NA |   |
| ASV_16s_3102 | 1.863443067 | -0.796139017 | 3.547907966 | 2.819447275  | 0.901187343 | NA |   |
| ASV_16s_3103 | 1.774974173 | -0.773880361 | 3.547230027 | 2.822884023  | 0.900889196 | NA |   |
| ASV_16s_3104 | 1.807092192 | -1.203414157 | 2.305695683 | 4.495284213  | 0.72128506  | NA |   |
| ASV_16s_3105 | 1.897658856 | 1.085403382  | 2.668194356 | 5.4157399    | 0.609365723 | NA |   |
| ASV_16s_3106 | 1.996029618 | -0.540674299 | 2.874041233 | 5.335265338  | 0.619120999 | NA |   |
| ASV_16s_3107 | 1.534629608 | 1.583898383  | 3.544238881 | 1.614990477  | 0.978059675 | NA |   |
| ASV_16s_3108 | 1.99405567  | -0.05284072  | 3.549889087 | 1.444566259  | 0.984166972 | NA |   |
| ASV_16s_3109 | 2.400712445 | 0.331084677  | 3.548172485 | 3.129849896  | 0.872735572 |    | 1 |
| ASV_16s_3110 | 2.100372487 | 0.315939175  | 3.550621447 | 2.136142816  | 0.951922216 |    | 1 |
| ASV_16s_3111 | 1.993216922 | 0.694059546  | 3.55058952  | 2.04381104   | 0.957375743 | NA |   |
| ASV_16s_3112 | 1.535095678 | -0.021031232 | 3.547918775 | 3.526605029  | 0.832399526 | NA |   |
| ASV_16s_3113 | 1.545299888 | 0.497893005  | 3.547184629 | 3.391972273  | 0.846531711 | NA |   |
| ASV_16s_3114 | 0.983248629 | -14.1466935  | 3.552157344 | 0.273619764  | 0.999926771 | NA |   |
| ASV_16s_3115 | 1.884600302 | -13.50172382 | 3.552157344 | 0.726319546  | 0.998125235 | NA |   |
| ASV_16s_3116 | 1.509576677 | -0.350409339 | 3.549065526 | 3.008991819  | 0.88416917  | NA |   |
| ASV_16s_3117 | 1.518066788 | 0.074974179  | 3.548048283 | 3.40303286   | 0.84538689  | NA |   |
| ASV_16s_3118 | 1.613801806 | 0.00454279   | 3.547828325 | 3.802614512  | 0.802211035 | NA |   |
| ASV_16s_3119 | 1.608661989 | 0.789118306  | 3.54612137  | 2.781035187  | NA          | NA |   |
| ASV_16s_3120 | 2.248376679 | 0.409226596  | 3.549806639 | 1.002801799  | 0.994783213 |    | 1 |
| ASV_16s_3121 | 0.429065418 | -0.075478201 | 3.55057894  | 1.999965834  | 0.95984226  | NA |   |
| ASV_16s_3122 | 1.489921943 | 0.0638883    | 3.547912232 | 3.64401029   | 0.819745056 | NA |   |
| ASV_16s_3123 | 1.562074474 | 1.83331773   | 3.077812406 | 4.019878947  | 0.777484913 | NA |   |
| ASV_16s_3124 | 1.844411638 | -0.796461995 | 3.547846003 | 2.777983603  | 0.904753044 | NA |   |
| ASV_16s_3125 | 1.821403047 | -0.792243296 | 2.988633345 | 3.518737341  | 0.833236878 | NA |   |
| ASV_16s_3126 | 2.004248248 | 0.240536322  | 3.547156747 | 3.329708337  | 0.852919735 |    | 1 |
| ASV_16s_3127 | 2.359183995 | 0.271426892  | 3.549159688 | 1.471346572  | NA          | NA |   |
| ASV_16s_3128 | 1.879302365 | 0.083637189  | 3.549206181 | 2.8527884    | 0.898278293 | NA |   |
| ASV_16s_3129 | 2.141959499 | 0.79673304   | 3.549345029 | 2.784777337  | 0.904172802 |    | 1 |
| ASV_16s_3130 | 0.477909158 | -22.633382   | 3.55144171  | -0.179480201 | NA          | NA |   |
| ASV_16s_3131 | 1.688250723 | -0.969329748 | 3.54810616  | 2.349555744  | 0.937993435 | NA |   |
| ASV_16s_3132 | 1.870578761 | 1.236113996  | 3.033480533 | 4.571469344  | 0.712094948 | NA |   |
| ASV_16s_3133 | 1.60371329  | 0.97813675   | 2.582391372 | 3.793548184  | 0.803225922 | NA |   |
| ASV_16s_3134 | 1.986312312 | 2.056724802  | 3.546491277 | 1.485745383  | 0.982799054 | NA |   |
| ASV_16s_3135 | 1.871049096 | -0.63876012  | 3.548453534 | 2.642091919  | 0.91602291  | NA |   |
| ASV_16s_3136 | 1.861712689 | 0.540939663  | 3.548142999 | 4.308171411  | 0.743676313 | NA |   |
| ASV_16s_3137 | 1.991092764 | 17.41783936  | 3.551443487 | 0.660566677  | 0.998620718 | NA |   |
| ASV_16s_3138 | 1.404844358 | -0.386059194 | 3.549078972 | 2.88011652   | NA          | NA |   |
| ASV_16s_3139 | 0.406280047 | -0.127769378 | 3.550575803 | 1.636143907  | 0.977218812 | NA |   |
| ASV_16s_3140 | 1.853733427 | -0.137619021 | 3.093963348 | 3.292392863  | 0.856700961 | NA |   |
| ASV_16s_3141 | 1.66826001  | -0.51752657  | 3.547276868 | 2.240975999  | 0.945308401 | NA |   |
| ASV_16s_3142 | 1.517144431 | -0.04333566  | 3.548982298 | 3.035092835  | 0.881736981 | NA |   |
| ASV_16s_3143 | 1.506900053 | 0.454647669  | 3.547654573 | 3.265468812  | 0.859406644 | NA |   |
| ASV_16s_3144 | 1.545899561 | 1.021348208  | 3.547063989 | 3.180524286  | 0.867815124 | NA |   |
| ASV_16s_3145 | 1.934002084 | 0.613029335  | 3.334506596 | 3.080763661  | 0.877431725 | NA |   |
| ASV_16s_3146 | 1.546346929 | 0.084722765  | 3.548238759 | 3.425810478  | 0.843019955 | NA |   |
| ASV_16s_3147 | 1.471317232 | 0.630025354  | 3.548015044 | 3.289814584  | 0.856960887 | NA |   |
| ASV_16s_3148 | 1.647050423 | 0.116389719  | 3.547796751 | 4.061718538  | 0.772641834 | NA |   |
| ASV_16s_3149 | 1.774927484 | -0.906226981 | 3.547388399 | 1.922008791  | 0.96403051  | NA |   |
| ASV_16s_3150 | 1.809898961 | -0.348281453 | 2.395283186 | 6.37973269   | 0.496173953 | NA |   |
| ASV_16s_3151 | 1.853426566 | 2.782196121  | 3.545223496 | 2.299228938  | 0.941442095 | NA |   |
| ASV_16s_3152 | 1.566955658 | -0.061816224 | 3.549345233 | 2.845690164  | 0.898900717 | NA |   |
| ASV_16s_3153 | 2.167156454 | 0.213678471  | 3.546678665 | 2.450126699  | 0.930805519 |    | 1 |
| ASV_16s_3154 | 1.953134996 | 0.360452076  | 3.550364899 | 1.410875453  | 0.985235829 | NA |   |
| ASV_16s_3155 | 2.242802222 | 0.324177031  | 3.548160629 | 3.202532439  | 0.86565556  |    | 1 |

|              |             |              |             |              |             |    |
|--------------|-------------|--------------|-------------|--------------|-------------|----|
| ASV_16s_3156 | 2.040563793 | 0.920089335  | 3.549532794 | 2.186367536  | 0.948809166 | 1  |
| ASV_16s_3157 | 2.217806328 | 4.540709464  | 3.548738463 | 2.206940979  | NA          | NA |
| ASV_16s_3158 | 1.560851831 | 2.163796301  | 2.91347757  | 4.155881374  | 0.761658116 | NA |
| ASV_16s_3159 | 1.773860099 | -1.034446472 | 3.547146561 | 2.236703286  | 0.945586643 | NA |
| ASV_16s_3160 | 1.502582587 | 0.787008357  | 2.78638655  | 3.762539816  | NA          | NA |
| ASV_16s_3161 | 1.456490492 | -0.103205625 | 3.547093735 | 3.23310356   | 0.862633586 | NA |
| ASV_16s_3162 | 2.431127349 | 0.800975439  | 2.396289196 | 8.440414574  | 0.295363583 | 1  |
| ASV_16s_3163 | 1.831646527 | -0.099036503 | 3.548963652 | 1.950051252  | 0.962553067 | NA |
| ASV_16s_3164 | 1.490685422 | -0.274886878 | 3.549082233 | 3.074686167  | 0.878008224 | NA |
| ASV_16s_3165 | 1.541545163 | -0.24687341  | 3.547273157 | 3.214284814  | 0.86449686  | NA |
| ASV_16s_3166 | 1.548081112 | 0.969195035  | 3.547218198 | 3.319200087  | 0.853988183 | NA |
| ASV_16s_3167 | 1.431522254 | -0.97544967  | 2.721526873 | 1.210334772  | 0.990686992 | NA |
| ASV_16s_3168 | 1.698501092 | 0.410651054  | 3.148118121 | 2.648009091  | 0.915545762 | NA |
| ASV_16s_3169 | 1.700372526 | 0.280243045  | 2.827825543 | 2.488300334  | 0.927975482 | NA |
| ASV_16s_3170 | 2.001819844 | 1.181885127  | 3.549898312 | 1.679946632  | 0.975418803 | 1  |
| ASV_16s_3171 | 1.462393358 | -0.241271572 | 3.549091569 | 3.072772811  | 0.878189494 | NA |
| ASV_16s_3172 | 0.61511229  | -14.62303516 | 3.552157344 | -0.01379061  | NA          | NA |
| ASV_16s_3173 | 0.698646933 | 21.23520976  | 3.551458044 | 0.131958453  | NA          | NA |
| ASV_16s_3174 | 1.76552633  | -0.330743931 | 2.435229783 | 5.106214865  | 0.647003017 | NA |
| ASV_16s_3175 | 1.778690822 | -0.796276068 | 3.547865234 | 2.747621135  | 0.907326951 | NA |
| ASV_16s_3176 | 1.824262891 | -0.943504467 | 3.547012716 | 2.2920579    | 0.941925342 | NA |
| ASV_16s_3177 | 1.787571602 | -0.796269419 | 3.547872161 | 2.758612246  | 0.906398861 | NA |
| ASV_16s_3178 | 1.45621097  | 0.336963362  | 3.548711711 | 3.071123372  | 0.878345674 | NA |
| ASV_16s_3179 | 1.871147236 | 0.13068461   | 3.546966463 | 2.884136459  | 0.895509625 | NA |
| ASV_16s_3180 | 1.812545592 | -0.925384903 | 3.546863657 | 2.242394747  | 0.945215849 | NA |
| ASV_16s_3181 | 1.609283424 | -1.132206383 | 3.22438448  | 2.774371134  | 0.905060939 | NA |
| ASV_16s_3182 | 1.502883335 | -9.138454129 | 3.552157344 | 0.261257939  | NA          | NA |
| ASV_16s_3183 | 1.532832454 | -0.745665313 | 3.548361261 | 2.156505236  | 0.950672483 | NA |
| ASV_16s_3184 | 0.958937407 | -15.66968652 | 3.552157344 | 0.258260062  | 0.999939821 | NA |
| ASV_16s_3185 | 1.292338114 | 0.686964766  | 3.549716905 | 0.75291728   | 0.99789529  | NA |
| ASV_16s_3186 | 1.13073035  | 16.16012422  | 3.550223289 | 0.541905858  | NA          | NA |
| ASV_16s_3187 | 1.828675162 | 0.532953303  | 3.133070754 | 4.753449289  | 0.690021424 | NA |
| ASV_16s_3188 | 1.395459413 | -0.271879537 | 3.549099381 | 3.011500691  | NA          | NA |
| ASV_16s_3189 | 0.491486054 | -0.682859255 | 3.549641463 | 0.985073828  | NA          | NA |
| ASV_16s_3190 | 0.407164623 | -0.087753744 | 3.5505804   | 1.888759089  | 0.965739791 | NA |
| ASV_16s_3191 | 1.512593276 | 0.126373446  | 3.547565745 | 3.357312198  | 0.85009967  | NA |
| ASV_16s_3192 | 1.611887925 | 2.152774481  | 3.545755942 | 2.921588674  | 0.892159896 | NA |
| ASV_16s_3193 | 1.532664683 | -0.518128772 | 3.546781983 | 2.536500273  | 0.92432357  | NA |
| ASV_16s_3194 | 1.778789929 | -0.797485813 | 3.187326481 | 3.193774149  | 0.866516585 | NA |
| ASV_16s_3195 | 1.806075937 | 0.403723024  | 3.549256883 | 1.38800467   | NA          | NA |
| ASV_16s_3196 | 1.685147252 | 2.022332103  | 2.799014593 | 4.070217809  | 0.771655108 | NA |
| ASV_16s_3197 | 1.787420438 | 0.690998479  | 3.549693022 | 1.64285266   | 0.976948275 | NA |
| ASV_16s_3198 | 0.465441963 | -22.34981814 | 3.551441833 | -0.195662714 | NA          | NA |
| ASV_16s_3199 | 1.492873698 | 0.774880822  | 3.547389209 | 3.225801463  | 0.863357724 | NA |
| ASV_16s_3200 | 1.718690512 | -0.184186276 | 3.247162502 | 3.654846357  | 0.818562589 | NA |
| ASV_16s_3201 | 1.95494452  | 0.416124374  | 3.549402181 | 1.127896686  | NA          | NA |
| ASV_16s_3202 | 1.174372376 | -0.490056984 | 3.299425745 | 3.088571465  | 0.87668949  | NA |
| ASV_16s_3203 | 1.594669442 | -0.678635555 | 3.548512556 | 3.622367919  | 0.822099592 | NA |
| ASV_16s_3204 | 1.544762732 | 0.761743536  | 3.265781043 | 3.429129713  | 0.842673995 | NA |
| ASV_16s_3205 | 2.003455016 | -0.912608633 | 3.324037423 | 3.186563557  | 0.867223859 | 1  |
| ASV_16s_3206 | 0.970695065 | -0.216548102 | 3.549709228 | 2.137248821  | 0.95185477  | NA |
| ASV_16s_3207 | 2.367411502 | -3.142506363 | 3.54534471  | 0.696050534  | NA          | NA |
| ASV_16s_3208 | 1.462928186 | -0.241387444 | 3.549091465 | 3.07307566   | 0.87816081  | NA |
| ASV_16s_3209 | 1.442655183 | 0.057410782  | 3.54904788  | 2.934554528  | 0.890989721 | NA |
| ASV_16s_3210 | 1.474355975 | -0.076515355 | 3.548341943 | 3.025325189  | 0.882649597 | NA |
| ASV_16s_3211 | 1.474412859 | 0.627453658  | 3.548273006 | 3.160619913  | 0.869756588 | NA |
| ASV_16s_3212 | 1.437305513 | 0.119907257  | 3.548160824 | 3.441248748  | 0.841408615 | NA |
| ASV_16s_3213 | 1.422292444 | 0.034390062  | 3.548018442 | 3.448827366  | 0.840615542 | NA |
| ASV_16s_3214 | 1.511744301 | -0.082480834 | 3.54791489  | 3.407394119  | 0.84493466  | NA |
| ASV_16s_3215 | 1.500307272 | 1.163207536  | 3.547529712 | 3.199617077  | 0.865942404 | NA |
| ASV_16s_3216 | 1.506376074 | 0.823767569  | 3.547348261 | 3.116213519  | 0.874047369 | NA |
| ASV_16s_3217 | 0.572966728 | 0.885296756  | 3.547303623 | 0.933934933  | NA          | NA |
| ASV_16s_3218 | 1.55122546  | 0.970119396  | 3.546897306 | 3.038498428  | 0.881418107 | NA |
| ASV_16s_3219 | 1.742134339 | -0.695530764 | 3.5478252   | 2.65558264   | 0.914933217 | NA |
| ASV_16s_3220 | 1.907279877 | -0.904547481 | 2.747115752 | 4.20732758   | 0.755611682 | NA |
| ASV_16s_3221 | 1.118843686 | 2.571702708  | 3.547632477 | 1.579705433  | 0.979421283 | NA |
| ASV_16s_3222 | 0.88547098  | 1.3395269    | 3.549418    | 1.069161286  | NA          | NA |

|              |             |              |             |              |             |    |
|--------------|-------------|--------------|-------------|--------------|-------------|----|
| ASV_16s_3223 | 1.260473229 | 0.254429755  | 3.550563915 | 0.437310909  | 0.999645196 | NA |
| ASV_16s_3224 | 1.470213415 | -22.5085071  | 3.550763562 | 1.701018833  | 0.974524525 | NA |
| ASV_16s_3225 | 1.647248168 | 1.581927     | 3.548286316 | 2.609060557  | NA          | NA |
| ASV_16s_3226 | 2.03215193  | 0.771598429  | 3.549750148 | 2.242292229  | 0.94522254  |    |
| ASV_16s_3227 | 1.7147048   | -0.623328556 | 3.547047006 | 2.51769266   | 0.925758908 | NA |
| ASV_16s_3228 | 1.704581668 | -0.795908109 | 3.54796174  | 2.745045957  | 0.907543797 | NA |
| ASV_16s_3229 | 1.632018483 | 2.992109362  | 2.048628595 | 7.058510498  | 0.422813323 | NA |
| ASV_16s_3230 | 1.902010681 | -0.97337615  | 3.548305304 | 1.570394966  | 0.979772042 | NA |
| ASV_16s_3231 | 1.053717966 | 17.92964939  | 3.551443967 | 0.234801612  | NA          | NA |
| ASV_16s_3232 | 1.11580162  | -8.686728213 | 3.549623143 | 0.776929099  | NA          | NA |
| ASV_16s_3233 | 1.820769899 | 1.244090592  | 3.547907252 | 1.750845387  | 0.97233646  | NA |
| ASV_16s_3234 | 1.385991705 | -0.202823249 | 3.549111607 | 3.02603001   | NA          | NA |
| ASV_16s_3235 | 1.582229949 | -0.804948229 | 3.548327099 | 2.637003395  | 0.916432231 | NA |
| ASV_16s_3236 | 1.39037305  | -0.802186162 | 3.547921465 | 2.376153965  | NA          | NA |
| ASV_16s_3237 | 1.468886656 | -0.826666842 | 3.547743591 | 2.321543015  | 0.939925345 | NA |
| ASV_16s_3238 | 1.650258688 | 0.154270582  | 3.548096278 | 3.656355885  | 0.818397677 | NA |
| ASV_16s_3239 | 1.788813406 | -0.322420799 | 2.18240426  | 8.736845086  | 0.272105729 | NA |
| ASV_16s_3240 | 1.977133554 | 1.183273889  | 3.549619953 | 1.607239196  | 0.978363176 | NA |
| ASV_16s_3241 | 0.979237025 | 2.359527779  | 3.548637507 | 0.730350954  | NA          | NA |
| ASV_16s_3242 | 1.778053285 | 3.34217483   | 3.546191997 | 0.627242705  | NA          | NA |
| ASV_16s_3243 | 1.745250672 | 1.061008058  | 3.547858193 | 1.775270895  | 0.971226042 | NA |
| ASV_16s_3244 | 1.759372865 | 0.393716419  | 3.548633148 | 1.971057924  | 0.961424846 | NA |
| ASV_16s_3245 | 0.482735561 | -0.682791273 | 3.549657838 | 0.9792854    | NA          | NA |
| ASV_16s_3246 | 1.618698799 | -0.693826675 | 3.547946626 | 2.630557535  | 0.916949397 | NA |
| ASV_16s_3247 | 1.311607335 | 0.763086195  | 3.547147285 | 3.16998163   | 0.868844839 | NA |
| ASV_16s_3248 | 1.516505387 | -0.60840776  | 3.546729408 | 2.757274634  | 0.906512032 | NA |
| ASV_16s_3249 | 1.491588972 | 2.044354395  | 3.545924793 | 2.544906921  | 0.923677738 | NA |
| ASV_16s_3250 | 1.708860867 | 0.044090304  | 3.257733441 | 4.18734456   | 0.757963878 | NA |
| ASV_16s_3251 | 1.532966002 | -0.50117956  | 2.951785863 | 2.314822302  | 0.940384243 | NA |
| ASV_16s_3252 | 0.429531587 | -22.20453077 | 3.551442153 | -0.244783119 | NA          | NA |
| ASV_16s_3253 | 1.598520313 | 0.159233811  | 3.547759239 | 2.513609426  | 0.92606878  | NA |
| ASV_16s_3254 | 1.33425058  | -1.02230635  | 3.324911945 | 2.871470323  | 0.896632182 | NA |
| ASV_16s_3255 | 1.858395527 | 0.465349949  | 3.467976372 | 4.311276071  | 0.74330724  | NA |
| ASV_16s_3256 | 1.903435259 | 17.34305845  | 3.551443774 | 0.632906948  | 0.99879983  | NA |
| ASV_16s_3257 | 0.409926708 | -0.064167896 | 3.550583199 | 1.995793542  | 0.960072819 | NA |
| ASV_16s_3258 | 0.870006048 | -7.323008476 | 3.552157344 | 0.198620056  | NA          | NA |
| ASV_16s_3259 | 1.483666044 | -0.417451867 | 3.54893242  | 2.70727048   | 0.910698252 | NA |
| ASV_16s_3260 | 1.698772371 | -0.330236847 | 3.071296966 | 3.716210572  | 0.811822421 | NA |
| ASV_16s_3261 | 1.572148194 | -0.845014461 | 2.688290353 | 3.849970671  | 0.796886694 | NA |
| ASV_16s_3262 | 1.716921257 | -0.868265556 | 3.003878095 | 3.412587234  | 0.844395572 | NA |
| ASV_16s_3263 | 1.637880848 | -1.872478344 | 3.239457922 | 2.405705352  | 0.934028623 | NA |
| ASV_16s_3264 | 1.591537959 | -0.782494027 | 3.54933407  | 2.33496992   | 0.939003205 | NA |
| ASV_16s_3265 | 0.978733309 | -16.02388628 | 3.552157344 | 0.270785532  | 0.999929314 | NA |
| ASV_16s_3266 | 1.396747127 | -21.31037527 | 3.550818361 | 1.71642135   | 0.973859184 | NA |
| ASV_16s_3267 | 1.436179186 | -0.012889401 | 3.547890892 | 3.534142392  | 0.831596039 | NA |
| ASV_16s_3268 | 1.070662408 | 0.771574362  | 3.546819583 | 1.64623605   | 0.976811131 | NA |
| ASV_16s_3269 | 1.804575931 | -0.796288652 | 3.547881559 | 2.775115199  | 0.904997558 | NA |
| ASV_16s_3270 | 1.676771368 | -1.188222988 | 2.416851108 | 4.373551381  | 0.735885416 | NA |
| ASV_16s_3271 | 0.93618397  | 0.219955078  | 3.55060733  | 1.560193587  | 0.980152292 | NA |
| ASV_16s_3272 | 1.015685968 | 0.067722984  | 3.549849081 | 2.339075604  | 0.938719816 | NA |
| ASV_16s_3273 | 0.588860114 | 0.085239296  | 3.550592398 | 2.490416953  | 0.927816948 | NA |
| ASV_16s_3274 | 1.548437018 | -0.713833377 | 3.548030789 | 2.611555489  | NA          | NA |
| ASV_16s_3275 | 1.465150627 | 0.503043588  | 3.548111284 | 3.324344229  | 0.853465495 | NA |
| ASV_16s_3276 | 1.54978565  | 0.160335558  | 3.546634727 | 3.170660742  | 0.868778603 | NA |
| ASV_16s_3277 | 1.548038526 | -0.102254768 | 3.07907662  | 3.329112823  | 0.85298036  | NA |
| ASV_16s_3278 | 1.595494036 | -0.6093725   | 2.757073219 | 3.129015916  | 0.872816141 | NA |
| ASV_16s_3279 | 1.910515239 | 0.211209598  | 3.545553408 | 3.131164481  | 0.872609047 | NA |
| ASV_16s_3280 | 1.787033806 | -0.802502772 | 3.191434674 | 2.949805173  | 0.889606495 | NA |
| ASV_16s_3281 | 1.646598839 | -0.506632952 | 3.547399086 | 2.833096295  | 0.90000926  | NA |
| ASV_16s_3282 | 1.747471842 | -0.796325884 | 3.547878567 | 2.735479047  | 0.908347378 | NA |
| ASV_16s_3283 | 1.544450487 | 0.441390699  | 3.546073669 | 2.20374172   | 0.947708423 | NA |
| ASV_16s_3284 | 1.909847449 | 0.381944347  | 3.55026595  | 1.058037389  | 0.993837204 | NA |
| ASV_16s_3285 | 1.980420114 | 0.553378549  | 3.548287297 | 3.523356923  | 0.832745387 | NA |
| ASV_16s_3286 | 1.986114097 | 0.639595785  | 3.5493757   | 2.859522569  | 0.897686253 | NA |
| ASV_16s_3287 | 1.533446655 | 1.214101578  | 2.626660238 | 4.972899411  | 0.663270586 | NA |
| ASV_16s_3288 | 1.624347758 | 0.520608433  | 3.546742556 | 3.464778751  | 0.838941879 | NA |
| ASV_16s_3289 | 1.558991064 | 0.043678582  | 3.547856008 | 3.856174355  | 0.796186365 | NA |



|              |             |              |             |              |             |    |
|--------------|-------------|--------------|-------------|--------------|-------------|----|
| ASV_16s_3290 | 1.647617893 | -1.033288188 | 3.032136537 | 2.777452051  | 0.904798377 | NA |
| ASV_16s_3291 | 1.373984099 | 0.777620991  | 3.320742921 | 3.016205571  | 0.883499045 | NA |
| ASV_16s_3292 | 0.986812769 | -20.83927471 | 3.550976001 | 0.500290227  | 0.999445418 | NA |
| ASV_16s_3293 | 0.752937094 | 0.427914497  | 3.548121559 | 2.164709965  | NA          | NA |
| ASV_16s_3294 | 1.995849003 | 4.071025188  | 3.550842644 | 1.596065864  | NA          | NA |
| ASV_16s_3295 | 1.435523629 | 0.472257111  | 3.547278407 | 3.261087373  | 0.859845134 | NA |
| ASV_16s_3296 | 1.470889439 | 0.657116722  | 3.547205074 | 3.48935487   | 0.836351714 | NA |
| ASV_16s_3297 | 1.473232366 | 0.264021813  | 3.546974304 | 2.843464193  | 0.899095563 | NA |
| ASV_16s_3298 | 1.752835976 | -0.68201544  | 2.419888368 | 7.559192704  | 0.373061667 | NA |
| ASV_16s_3299 | 1.411257874 | 0.340708115  | 3.546971434 | 3.276650827  | 0.858285251 | NA |
| ASV_16s_3300 | 1.317104762 | 0.341288508  | 3.54661496  | 2.813699705  | 0.901685074 | NA |
| ASV_16s_3301 | 1.653591842 | -0.974740519 | 3.547404503 | 2.612748009  | 0.918370493 | NA |
| ASV_16s_3302 | 1.836955212 | 0.363361201  | 3.54998797  | 1.661136279  | 0.976201522 | NA |
| ASV_16s_3303 | 1.423182016 | -0.275584273 | 3.549093548 | 3.028437884  | 0.882359085 | NA |
| ASV_16s_3304 | 1.36919132  | 0.294816591  | 3.548849664 | 2.923770803  | NA          | NA |
| ASV_16s_3305 | 1.510534316 | -0.324070451 | 3.546859298 | 3.188812538  | 0.867003416 | NA |
| ASV_16s_3306 | 1.522755353 | 0.715496955  | 3.281649873 | 3.750821111  | 0.807988915 | NA |
| ASV_16s_3307 | 1.452905595 | -0.96614483  | 3.547840793 | 2.121909975  | 0.952785693 | NA |
| ASV_16s_3308 | 1.641649407 | -0.134734319 | 2.880846823 | 3.055546681  | 0.879816579 | NA |
| ASV_16s_3309 | 1.629005828 | 2.305439423  | 2.274901911 | 3.892892551  | 0.792028208 | NA |
| ASV_16s_3310 | 1.422129597 | 1.613931718  | 2.879329779 | 3.363202512  | 0.849495419 | NA |
| ASV_16s_3311 | 1.169531978 | -0.255315887 | 3.549453377 | 1.325261899  | NA          | NA |
| ASV_16s_3312 | 1.228523425 | -1.449397624 | 3.547650146 | 0.723598913  | 0.99814777  | NA |
| ASV_16s_3313 | 1.811878915 | 0.66875028   | 3.550596419 | 2.823753206  | 0.90081373  | NA |
| ASV_16s_3315 | 1.510666    | 0.114889793  | 3.547090488 | 3.016255428  | 0.883494408 | NA |
| ASV_16s_3316 | 1.729151649 | -0.798451097 | 3.184114655 | 3.343353493  | 0.851528129 | NA |
| ASV_16s_3317 | 1.820883784 | -0.866464116 | 3.546865466 | 2.836969204  | 0.899663147 | NA |
| ASV_16s_3318 | 1.789717471 | 0.199224936  | 2.989144297 | 2.09239389   | 0.954549916 | NA |
| ASV_16s_3319 | 0.996261757 | 0.635796717  | 3.548901549 | 2.874585042  | 0.896356621 | NA |
| ASV_16s_3320 | 1.85306218  | 0.341700337  | 3.550562002 | 1.542217273  | 0.980812003 | NA |
| ASV_16s_3321 | 1.451082816 | 0.179080457  | 3.546938747 | 3.260910151  | 0.859862859 | NA |
| ASV_16s_3322 | 2.377391922 | 0.271426559  | 3.549157753 | 1.473794458  | NA          | NA |
| ASV_16s_3323 | 1.833406813 | 18.16425378  | 3.550354303 | 0.973212514  | 0.995249159 | NA |
| ASV_16s_3324 | 1.75936582  | 0.680897812  | 3.548092471 | 2.603194423  | 0.919128073 | NA |
| ASV_16s_3325 | 0.480011947 | 0.145843894  | 3.550603946 | 2.753018415  | 0.906871725 | NA |
| ASV_16s_3326 | 0.848850886 | -13.61876446 | 3.552157344 | 0.183532384  | NA          | NA |
| ASV_16s_3327 | 1.471462819 | 0.086481145  | 3.547980083 | 3.583941683  | 0.826256158 | NA |
| ASV_16s_3328 | 1.478150796 | -1.29E-04    | 3.547902244 | 3.55678016   | 0.829175313 | NA |
| ASV_16s_3329 | 1.449673284 | 0.567094372  | 3.546967139 | 3.407218604  | 0.844952869 | NA |
| ASV_16s_3330 | 1.387841355 | 2.367037342  | 3.545202098 | 2.222851565  | 0.946483629 | NA |
| ASV_16s_3331 | 1.715500844 | 0.339486813  | 2.202855059 | 4.345076823  | 0.739283283 | NA |
| ASV_16s_3332 | 1.530430245 | -0.957402031 | 3.54659381  | 1.426645501  | NA          | NA |
| ASV_16s_3333 | 1.642608716 | -1.032313038 | 3.547663836 | 3.199780799  | NA          | NA |
| ASV_16s_3334 | 0.882558668 | 0.449326027  | 3.549219156 | 3.270241873  | NA          | NA |
| ASV_16s_3335 | 1.349062526 | -0.324742151 | 3.549098038 | 2.930987094  | 0.891312219 | NA |
| ASV_16s_3336 | 1.349357302 | -0.051584247 | 2.388262136 | 4.226134024  | 0.753393931 | NA |
| ASV_16s_3337 | 2.420757386 | 0.508050001  | 3.548930558 | 3.611405192  | 0.82328858  |    |
| ASV_16s_3338 | 2.025369158 | -0.535445843 | 2.801212599 | 2.63507026   | NA          | NA |
| ASV_16s_3339 | 1.555490263 | 0.299905121  | 2.453385229 | 7.006501982  | 0.428203187 | NA |
| ASV_16s_3340 | 1.793833131 | 3.872441276  | 3.544902236 | 1.206136647  | NA          | NA |
| ASV_16s_3341 | 1.744726958 | -3.169691234 | 3.549943084 | 1.792179245  | 0.970442777 | NA |
| ASV_16s_3342 | 0.285988912 | 0.688156771  | 3.550786696 | 1.030750114  | 0.994317125 | NA |
| ASV_16s_3343 | 1.590265439 | -0.269590033 | 2.89545292  | 3.546160046  | 0.830312354 | NA |
| ASV_16s_3344 | 1.215329165 | 2.168765988  | 3.150776571 | 2.779450171  | 0.90462792  | NA |
| ASV_16s_3345 | 1.870241802 | -7.111559186 | 3.550186807 | 2.830491923  | NA          | NA |
| ASV_16s_3346 | 1.889537659 | 0.343889946  | 3.549494514 | 2.898135161  | 0.894262888 | NA |
| ASV_16s_3347 | 1.353745455 | -0.300533877 | 3.549101437 | 2.959356904  | 0.888736411 | NA |
| ASV_16s_3348 | 0.413912256 | -22.24556125 | 3.551442381 | -0.267446436 | NA          | NA |
| ASV_16s_3349 | 0.367143209 | -0.170266572 | 3.5505787   | 1.109959706  | NA          | NA |
| ASV_16s_3350 | 0.367143209 | -0.170266572 | 3.5505787   | 1.109959706  | NA          | NA |
| ASV_16s_3351 | 0.436434758 | -6.798686372 | 3.552157344 | -0.223826399 | NA          | NA |
| ASV_16s_3352 | 1.469829692 | 0.495112852  | 3.547476145 | 3.530627722  | 0.831970862 | NA |
| ASV_16s_3353 | 1.206051376 | 10.7371869   | 3.546994416 | -0.398002161 | 1           | NA |
| ASV_16s_3354 | 1.68664967  | -0.796256636 | 3.547895829 | 2.703986574  | 0.910970122 | NA |
| ASV_16s_3355 | 1.639266232 | -0.939707488 | 3.216359712 | 2.859418452  | 0.897695417 | NA |
| ASV_16s_3356 | 2.067975375 | 0.502117125  | 3.549123429 | 3.094605853  | NA          | NA |
| ASV_16s_3357 | 1.838561013 | -0.920680359 | 3.548590539 | 1.474235013  | 0.983188261 | NA |

|              |             |              |             |             |             |    |
|--------------|-------------|--------------|-------------|-------------|-------------|----|
| ASV_16s_3358 | 0.973804447 | -0.664481281 | 3.549922466 | 1.997595381 | 0.959973339 | NA |
| ASV_16s_3359 | 1.29252375  | -0.898079852 | 3.546905193 | 1.824887634 | 0.968893687 | NA |
| ASV_16s_3360 | 1.16995655  | 2.40671607   | 3.547255524 | 0.33345042  | 0.999857033 | NA |
| ASV_16s_3361 | 1.839382529 | 0.087618204  | 3.550588256 | 3.088479616 | 0.876698232 | NA |
| ASV_16s_3362 | 1.828336889 | -0.116689935 | 3.549805763 | 2.523310919 | 0.925331524 | NA |
| ASV_16s_3363 | 2.087154354 | 1.042123854  | 3.482911043 | 2.545870199 | 0.923603567 |    |
| ASV_16s_3364 | 1.698757708 | 0.363427182  | 3.5498011   | 1.582170511 | 0.97932782  | NA |
| ASV_16s_3365 | 1.311824151 | -0.29175387  | 3.549111654 | 2.935938814 | NA          | NA |
| ASV_16s_3366 | 0.549112301 | 0.21997162   | 3.550629179 | 1.288780042 | 0.9887371   | NA |
| ASV_16s_3367 | 1.324541778 | 0.016715255  | 3.548118564 | 3.276932892 | NA          | NA |
| ASV_16s_3368 | 1.558833085 | 0.688344457  | 2.878482601 | 5.214790594 | 0.633769579 | NA |
| ASV_16s_3369 | 1.414054167 | -0.79798748  | 3.547501569 | 2.094286547 | NA          | NA |
| ASV_16s_3370 | 1.632656083 | -0.794930265 | 3.548168048 | 2.720540642 | 0.909595789 | NA |
| ASV_16s_3371 | 1.581302764 | -1.000477555 | 3.547233441 | 2.236071078 | 0.94562775  | NA |
| ASV_16s_3372 | 0.909042854 | 0.219955633  | 3.550608256 | 1.545204701 | 0.980703281 | NA |
| ASV_16s_3373 | 1.432248907 | -0.45840019  | 3.54802919  | 2.558237505 | 0.922648252 | NA |
| ASV_16s_3374 | 1.410999815 | 0.949612086  | 3.546775865 | 3.010148808 | 0.884061798 | NA |
| ASV_16s_3375 | 1.080214552 | 1.604049925  | 3.546990315 | 2.624973971 | NA          | NA |
| ASV_16s_3376 | 1.314543348 | -3.020733125 | 3.545829699 | 0.946046817 | 0.995652563 | NA |
| ASV_16s_3377 | 1.64300487  | -0.439451134 | 2.116578687 | 5.525791344 | 0.596074796 | NA |
| ASV_16s_3378 | 1.333833542 | -0.895582621 | 3.54831869  | 1.708047223 | 0.974222144 | NA |
| ASV_16s_3379 | 1.75182668  | 0.449170985  | 3.146071627 | 4.720032079 | 0.694085068 | NA |
| ASV_16s_3380 | 0.247035629 | -0.170122965 | 3.550613998 | 0.909875743 | NA          | NA |
| ASV_16s_3381 | 0.219730307 | -0.544180806 | 3.550190256 | 0.63271416  | NA          | NA |
| ASV_16s_3382 | 1.413825131 | -1.151431029 | 3.547523449 | 1.57507667  | NA          | NA |
| ASV_16s_3383 | 1.135146811 | 0.064178767  | 3.136344841 | 1.603885588 | 0.978493719 | NA |
| ASV_16s_3384 | 1.306150525 | 2.223289575  | 3.547320635 | 1.329540043 | NA          | NA |
| ASV_16s_3385 | 1.285524045 | 0.083418147  | 3.548781111 | 3.020457289 | 0.883103334 | NA |
| ASV_16s_3386 | 0.911632514 | 0.219955718  | 3.550608166 | 1.546651073 | 0.980650512 | NA |
| ASV_16s_3387 | 0.830340119 | -6.805358328 | 3.552157344 | 0.170000557 | NA          | NA |
| ASV_16s_3388 | 0.86471388  | 17.83830706  | 3.551445285 | 0.113653061 | 0.999996402 | NA |
| ASV_16s_3389 | 1.403709462 | 0.031103726  | 3.547888622 | 3.601182829 | 0.824395015 | NA |
| ASV_16s_3390 | 1.847606422 | 2.79807261   | 3.546012539 | 0.668068535 | 0.998569234 | NA |
| ASV_16s_3391 | 1.654407211 | -0.796170897 | 3.547918194 | 2.695139303 | 0.911700687 | NA |
| ASV_16s_3392 | 1.490106994 | -1.012875379 | 3.099323448 | 1.948259829 | 0.962648429 | NA |
| ASV_16s_3393 | 1.69677615  | 0.482924791  | 3.549263097 | 2.635667021 | 0.916539574 | NA |
| ASV_16s_3394 | 1.356759731 | -0.069781522 | 3.549344396 | 3.045827462 | 0.880730684 | NA |
| ASV_16s_3395 | 1.940260192 | 0.271435889  | 3.54921471  | 1.408233424 | NA          | NA |
| ASV_16s_3396 | 1.71715382  | 0.399080262  | 3.550626371 | 3.645766088 | 0.819553619 | NA |
| ASV_16s_3397 | 1.732413627 | 0.606551566  | 3.550606783 | 3.554577626 | 0.829411329 | NA |
| ASV_16s_3398 | 1.965534671 | 17.11528436  | 3.551444612 | 0.658145362 | NA          | NA |
| ASV_16s_3399 | 1.294993531 | -0.295112364 | 3.549114557 | 2.920357882 | NA          | NA |
| ASV_16s_3401 | 1.49429292  | 0.20860517   | 3.279020129 | 3.525155184 | 0.832553936 | NA |
| ASV_16s_3402 | 1.383207164 | 0.014510873  | 3.547704652 | 2.557850218 | 0.922678254 | NA |
| ASV_16s_3403 | 1.729303046 | -0.796547562 | 3.547840117 | 2.680268001 | 0.912922467 | NA |
| ASV_16s_3404 | 1.517315583 | 0.182594696  | 3.547939892 | 3.83434819  | 0.798647422 | NA |
| ASV_16s_3405 | 1.512293273 | 0.740225571  | 3.547142161 | 3.381881088 | 0.847573581 | NA |
| ASV_16s_3406 | 1.385288514 | 0.257901245  | 3.352730537 | 3.009869243 | NA          | NA |
| ASV_16s_3407 | 2.058721991 | 3.107420493  | 3.546953594 | 0.759591956 | NA          | NA |
| ASV_16s_3408 | 0.914635161 | 0.219955561  | 3.550608061 | 1.548323111 | 0.980589403 | NA |
| ASV_16s_3409 | 1.298248018 | 1.037000389  | 3.213697208 | 1.706549511 | 0.974286752 | NA |
| ASV_16s_3410 | 0.537777219 | 0.012465731  | 3.549746469 | 2.155189218 | NA          | NA |
| ASV_16s_3411 | 1.90126451  | 0.687839837  | 3.549578671 | 2.460203801 | 0.930063827 | NA |
| ASV_16s_3412 | 1.59566695  | -0.796368484 | 3.547883592 | 2.613325303 | 0.918324609 | NA |
| ASV_16s_3413 | 1.670225929 | -0.7984105   | 3.192649216 | 3.265901248 | 0.859363339 | NA |
| ASV_16s_3414 | 1.704746698 | -0.307263992 | 3.547784071 | 2.830039098 | 0.900267208 | NA |
| ASV_16s_3415 | 1.608640089 | -0.852020621 | 3.54795093  | 2.673692215 | 0.913460217 | NA |
| ASV_16s_3416 | 1.581511795 | -0.832994882 | 3.547846501 | 2.095736443 | 0.954351922 | NA |
| ASV_16s_3417 | 1.649433222 | -0.072566631 | 2.731690978 | 5.298732135 | 0.623558099 | NA |
| ASV_16s_3418 | 1.795700288 | 0.405494545  | 3.544496929 | 2.499857318 | NA          | NA |
| ASV_16s_3419 | 1.420987163 | 0.114849814  | 2.922385164 | 4.420205308 | 0.730303373 | NA |
| ASV_16s_3420 | 0.896437812 | 0.21995598   | 3.550608705 | 1.538091069 | 0.980961571 | NA |
| ASV_16s_3421 | 0.987267283 | 17.92450184  | 3.551444362 | 0.194873219 | NA          | NA |
| ASV_16s_3422 | 2.018665053 | 3.484499123  | 3.544225857 | 1.026251672 | NA          | NA |
| ASV_16s_3423 | 1.624253156 | 0.309378143  | 3.549845743 | 1.570516364 | 0.979767491 | NA |
| ASV_16s_3424 | 2.178095376 | 0.78662167   | 3.549325535 | 4.13797878  | 0.763754913 |    |
| ASV_16s_3425 | 2.050329905 | 9.591928391  | 3.55028683  | 1.583571561 | 0.979274588 |    |

1

1

1

|              |             |              |             |              |             |    |
|--------------|-------------|--------------|-------------|--------------|-------------|----|
| ASV_16s_3426 | 2.299189532 | 0.731903243  | 3.510608701 | 3.652976408  | 0.818766813 | 1  |
| ASV_16s_3427 | 1.40723576  | -0.337683084 | 3.549084898 | 2.956829774  | 0.888966891 | NA |
| ASV_16s_3428 | 1.524080252 | 0.399375295  | 3.546867726 | 2.981926336  | 0.886669142 | NA |
| ASV_16s_3429 | 1.627397196 | -1.734026095 | 2.845254365 | 1.753393392  | 0.972221787 | NA |
| ASV_16s_3430 | 1.484339937 | 1.186993107  | 3.286724645 | 3.311418171  | 0.854777598 | NA |
| ASV_16s_3431 | 0.959279081 | 0.478970653  | 3.550597855 | 2.867825854  | 0.896954206 | NA |
| ASV_16s_3432 | 1.436691512 | -1.150585386 | 3.54754171  | 1.800655626  | NA          | NA |
| ASV_16s_3433 | 0.403499369 | -22.06885963 | 3.551442496 | -0.283032243 | NA          | NA |
| ASV_16s_3434 | 1.339055669 | 0.563231695  | 3.548244683 | 3.062374348  | 0.879172735 | NA |
| ASV_16s_3435 | 1.409107681 | -0.562987881 | 3.548102303 | 2.594146233  | NA          | NA |
| ASV_16s_3436 | 1.296150468 | -2.53859157  | 3.338655295 | 1.621289723  | 0.977811206 | NA |
| ASV_16s_3437 | 1.602153004 | -0.774668552 | 2.284529147 | 5.600391892  | 0.587103948 | NA |
| ASV_16s_3438 | 1.664411053 | -0.929277684 | 2.853539593 | 3.425748092  | 0.843026455 | NA |
| ASV_16s_3439 | 1.622053529 | 2.637383671  | 3.138184352 | 2.31204414   | 0.940573418 | NA |
| ASV_16s_3440 | 1.388066746 | 0.827695167  | 2.931781209 | 4.173639621  | 0.759574455 | NA |
| ASV_16s_3441 | 1.520391993 | -0.246204194 | 3.546587007 | 2.795609284  | 0.903244418 | NA |
| ASV_16s_3442 | 1.456654252 | -2.664068768 | 3.545805583 | 0.608808703  | NA          | NA |
| ASV_16s_3443 | 1.413993339 | -0.069702231 | 3.549311583 | 3.052878094  | 0.880067846 | NA |
| ASV_16s_3444 | 1.798052402 | -0.556207783 | 3.548883652 | 2.445616189  | 0.931136244 | NA |
| ASV_16s_3445 | 1.82228998  | 1.005253729  | 3.548846744 | 2.264953869  | 0.94373337  | NA |
| ASV_16s_3446 | 2.002668023 | 1.703486053  | 3.550755055 | 3.472109616  | 0.838170714 | 1  |
| ASV_16s_3447 | 0.356752364 | -0.170258858 | 3.550580816 | 1.095402016  | NA          | NA |
| ASV_16s_3448 | 1.280824497 | 0.493341282  | 3.548744454 | 3.092937588  | NA          | NA |
| ASV_16s_3449 | 1.59782781  | -0.79819121  | 3.202092579 | 3.21070676   | 0.864850033 | NA |
| ASV_16s_3450 | 1.457847221 | -0.801094308 | 3.247886637 | 2.60677867   | 0.918844239 | NA |
| ASV_16s_3451 | 1.435361358 | -1.367535256 | 3.547471887 | 2.534233827  | 0.924497238 | NA |
| ASV_16s_3452 | 1.434030583 | -0.17752708  | 3.549123043 | 2.415900851  | 0.933295575 | NA |
| ASV_16s_3453 | 1.475165561 | -0.321345638 | 3.5478877   | 1.992685671  | 0.960244089 | NA |
| ASV_16s_3454 | 1.691108459 | 3.166835503  | 2.562313238 | 1.985728202  | 0.96062605  | NA |
| ASV_16s_3455 | 1.908856773 | -0.053158222 | 3.54669952  | 3.714825832  | 0.811975326 | NA |
| ASV_16s_3456 | 1.823888214 | 0.699026206  | 3.549567213 | 1.794065666  | 0.970354649 | NA |
| ASV_16s_3457 | 1.734224534 | 0.918329025  | 3.420531919 | 3.773494226  | 0.805465556 | NA |
| ASV_16s_3458 | 1.416959048 | 1.830904628  | 3.54628567  | 2.735003276  | 0.908387259 | NA |
| ASV_16s_3459 | 1.558843329 | -0.021756364 | 3.548416933 | 3.912406999  | 0.789809381 | NA |
| ASV_16s_3460 | 1.546651046 | 2.802156462  | 2.654027629 | 2.812214174  | 0.901813538 | NA |
| ASV_16s_3461 | 1.217976622 | -0.557135743 | 3.545919298 | 2.484404494  | NA          | NA |
| ASV_16s_3462 | 1.252443823 | 0.271463666  | 3.549384533 | 1.26699971   | NA          | NA |
| ASV_16s_3463 | 0.282431393 | -0.170175493 | 3.550600482 | 0.977227834  | 0.995187566 | NA |
| ASV_16s_3464 | 1.346658771 | -3.75E-04    | 3.548028124 | 3.381402043  | 0.847622978 | NA |
| ASV_16s_3465 | 1.374923564 | 1.246443919  | 3.547714684 | 2.906698417  | 0.893497106 | NA |
| ASV_16s_3466 | 1.183076622 | -1.01868185  | 3.547456788 | 2.043995384  | 0.957365205 | NA |
| ASV_16s_3467 | 1.452738144 | 2.761842573  | 2.905858799 | 1.653109225  | 0.976531073 | NA |
| ASV_16s_3468 | 1.182936661 | -0.069405424 | 3.550742994 | 1.839774898  | 0.968173811 | NA |
| ASV_16s_3469 | 1.717502259 | 0.355509805  | 3.54994836  | 2.48351951   | 0.928332941 | NA |
| ASV_16s_3470 | 0.415149389 | 0.126260146  | 3.550619956 | 1.953115762  | NA          | NA |
| ASV_16s_3471 | 1.339622343 | 0.806814375  | 3.547948828 | 2.929459627  | 0.891450179 | NA |
| ASV_16s_3472 | 1.286646745 | 0.878982246  | 3.547910128 | 3.047093294  | NA          | NA |
| ASV_16s_3473 | 1.285223709 | 0.104803195  | 3.547946485 | 3.522926856  | NA          | NA |
| ASV_16s_3474 | 1.396689943 | 1.448193045  | 3.546785533 | 3.114389595  | 0.874222393 | NA |
| ASV_16s_3475 | 1.640282871 | -0.798148943 | 3.196345751 | 3.280112456  | 0.857937428 | NA |
| ASV_16s_3476 | 1.637504452 | -0.79621815  | 3.547906656 | 2.674656208  | 0.91338148  | NA |
| ASV_16s_3477 | 1.621779625 | -0.341255208 | 3.229861075 | 4.321490029  | 0.742092392 | NA |
| ASV_16s_3478 | 1.6410893   | -0.795991742 | 3.547949148 | 2.701302844  | 0.911192022 | NA |
| ASV_16s_3479 | 1.273775755 | 0.049880323  | 3.339555015 | 2.039924891  | 0.957597574 | NA |
| ASV_16s_3480 | 1.743009582 | -0.011914223 | 3.546373442 | 3.307179791  | 0.855206891 | NA |
| ASV_16s_3481 | 1.65436261  | 0.080232198  | 3.186962273 | 5.351204495  | 0.61718669  | NA |
| ASV_16s_3482 | 0.953713417 | -6.94650227  | 3.550539743 | 0.257029042  | NA          | NA |
| ASV_16s_3483 | 1.551975905 | 14.29879272  | 3.551469819 | 1.971683052  | 0.96139099  | NA |
| ASV_16s_3484 | 1.327539221 | 0.633552138  | 3.547153861 | 2.056076119  | NA          | NA |
| ASV_16s_3485 | 1.693580546 | -0.796707723 | 3.547817986 | 2.57138629   | 0.92162637  | NA |
| ASV_16s_3486 | 1.588959072 | -0.783321247 | 3.26088353  | 2.149416971  | 0.951109441 | NA |
| ASV_16s_3487 | 1.523218116 | -0.878603358 | 2.926860912 | 3.496697141  | 0.835575194 | NA |
| ASV_16s_3488 | 1.092460014 | -0.985947466 | 3.343125442 | 1.679408309  | 0.975441407 | NA |
| ASV_16s_3489 | 1.529406543 | 0.066043197  | 3.276271043 | 2.862868991  | 0.897391493 | NA |
| ASV_16s_3490 | 1.503155384 | 1.173710836  | 3.547146293 | 2.052576533  | NA          | NA |
| ASV_16s_3491 | 0.455588513 | 0.038732607  | 3.550594913 | 2.26985346   | 0.943408702 | NA |
| ASV_16s_3492 | 1.60312401  | 0.176498068  | 2.469174852 | 6.257154107  | 0.510064266 | NA |

|              |             |              |             |             |             |    |
|--------------|-------------|--------------|-------------|-------------|-------------|----|
| ASV_16s_3493 | 1.362241833 | 0.043183005  | 3.547030229 | 3.045442299 | 0.88076685  | NA |
| ASV_16s_3494 | 1.416706829 | 1.818533212  | 2.749227432 | 2.328340621 | 0.939459384 | NA |
| ASV_16s_3495 | 1.646671593 | -0.246577275 | 2.823560401 | 3.145874227 | 0.871187652 | NA |
| ASV_16s_3496 | 0.371031148 | 0.294548236  | 3.551011303 | 0.909395094 | NA          | NA |
| ASV_16s_3497 | 1.252165893 | -0.30745413  | 3.549121735 | 2.875805328 | NA          | NA |
| ASV_16s_3498 | 1.473942106 | -0.489477812 | 3.548046335 | 2.613868117 | 0.918281454 | NA |
| ASV_16s_3499 | 1.446764348 | -0.338046456 | 3.547231543 | 3.006319529 | 0.884417008 | NA |
| ASV_16s_3500 | 1.680959031 | -0.367465024 | 3.547138452 | 2.872644136 | 0.896528372 | NA |
| ASV_16s_3501 | 1.333845998 | 2.468270654  | 3.114755478 | 3.086779012 | 0.876860046 | NA |
| ASV_16s_3502 | 1.60115168  | 0.034844282  | 3.548848691 | 3.53495495  | 0.831509345 | NA |
| ASV_16s_3503 | 1.434416363 | -0.75072275  | 3.547274174 | 2.044060654 | 0.957361474 | NA |
| ASV_16s_3504 | 1.217368283 | -0.54960038  | 3.122559601 | 2.100206758 | 0.954086408 | NA |
| ASV_16s_3505 | 1.802378662 | 0.178351639  | 3.550506553 | 2.252872778 | 0.944529817 | NA |
| ASV_16s_3506 | 0.440441509 | -0.68239213  | 3.549746066 | 0.94974352  | NA          | NA |
| ASV_16s_3507 | 0.798607375 | -13.31951719 | 3.552157344 | 0.146091975 | NA          | NA |
| ASV_16s_3508 | 1.311168385 | 0.826371521  | 3.546939682 | 3.273309111 | NA          | NA |
| ASV_16s_3509 | 1.465463067 | -1.501626068 | 3.546933285 | 1.681440286 | 0.975356021 | NA |
| ASV_16s_3510 | 1.45785696  | -0.771623101 | 3.547135219 | 2.130802242 | 0.952247189 | NA |
| ASV_16s_3511 | 1.367638531 | -2.144071964 | 3.544387574 | 1.617624134 | NA          | NA |
| ASV_16s_3512 | 1.073816321 | 0.262697249  | 3.545265528 | 2.005078916 | NA          | NA |
| ASV_16s_3513 | 1.746123136 | 1.212356809  | 3.548828893 | 1.982377611 | 0.960809278 | NA |
| ASV_16s_3514 | 0.936429609 | 16.60246281  | 3.551452144 | 0.203299281 | NA          | NA |
| ASV_16s_3515 | 0.440475474 | -0.020561794 | 3.550585858 | 2.194366553 | NA          | NA |
| ASV_16s_3517 | 1.308973359 | 0.208673069  | 3.54858256  | 3.325631448 | NA          | NA |
| ASV_16s_3518 | 1.356119339 | 0.104107411  | 3.548309278 | 3.283237508 | 0.857623155 | NA |
| ASV_16s_3519 | 1.610722732 | -0.796728559 | 3.547838322 | 2.462501447 | 0.929894174 | NA |
| ASV_16s_3520 | 1.461554957 | 3.290435934  | 3.544740037 | 0.49772238  | 0.999454778 | NA |
| ASV_16s_3521 | 1.529901163 | 0.5501011    | 2.906953423 | 4.383492788 | 0.734697458 | NA |
| ASV_16s_3522 | 1.332199274 | -0.479834203 | 3.546993227 | 2.310789741 | 0.940658734 | NA |
| ASV_16s_3523 | 1.60938446  | 0.389343753  | 3.54913234  | 1.919568645 | 0.964157521 | NA |
| ASV_16s_3524 | 1.591805497 | 0.087887089  | 3.54663175  | 3.360648291 | 0.849757547 | NA |
| ASV_16s_3525 | 0.860891288 | 0.219957095  | 3.550610043 | 1.517482827 | 0.981698226 | NA |
| ASV_16s_3526 | 0.536721909 | -0.717960863 | 3.549911824 | 1.412323228 | NA          | NA |
| ASV_16s_3527 | 1.827499279 | -0.213825182 | 3.546653778 | 2.360769643 | 0.937211429 | NA |
| ASV_16s_3528 | 1.698908036 | -0.091301663 | 3.549486436 | 1.520241617 | 0.98160061  | NA |
| ASV_16s_3529 | 0.933328848 | 16.57258688  | 3.551452217 | 0.201260249 | NA          | NA |
| ASV_16s_3530 | 1.29129765  | 0.052810242  | 3.548124476 | 3.293307174 | 0.856608745 | NA |
| ASV_16s_3531 | 1.593978435 | -0.796378381 | 3.547876289 | 2.599850247 | 0.919392474 | NA |
| ASV_16s_3532 | 1.482248312 | -0.251189361 | 3.357426856 | 2.942030473 | 0.890312578 | NA |
| ASV_16s_3533 | 0.377585657 | 0.278442342  | 3.551234431 | 0.808353145 | NA          | NA |
| ASV_16s_3534 | 1.303906151 | -0.415508176 | 2.814113062 | 2.488609872 | 0.927952308 | NA |
| ASV_16s_3535 | 1.491911287 | 2.508535429  | 3.547500332 | 1.762523566 | NA          | NA |
| ASV_16s_3536 | 1.756067556 | 0.793044873  | 3.548111872 | 2.606707232 | 0.9188499   | NA |
| ASV_16s_3537 | 1.284504529 | -0.24440197  | 3.54912535  | 2.943542982 | 0.890175365 | NA |
| ASV_16s_3539 | 1.32486717  | 0.062173737  | 3.548245244 | 3.235672352 | 0.862378498 | NA |
| ASV_16s_3540 | 1.30551334  | -0.068108328 | 3.548397446 | 2.998081163 | 0.885179683 | NA |
| ASV_16s_3541 | 1.360961239 | 0.561558446  | 3.54778285  | 3.357306105 | 0.850100295 | NA |
| ASV_16s_3542 | 1.663034106 | -0.46844692  | 3.102825517 | 3.720409664 | 0.811358529 | NA |
| ASV_16s_3543 | 1.676100412 | -0.949501502 | 3.052646291 | 1.907533709 | 0.964780309 | NA |
| ASV_16s_3544 | 0.733387368 | 0.323256919  | 3.550183582 | 1.135734679 | NA          | NA |
| ASV_16s_3545 | 0.3905591   | -0.606539475 | 3.550289071 | 0.900309576 | NA          | NA |
| ASV_16s_3546 | 1.586734602 | 0.984302747  | 3.550275372 | 2.126548311 | 0.952505205 | NA |
| ASV_16s_3547 | 1.75006364  | 0.698348723  | 3.548885418 | 2.082974256 | 0.95510541  | NA |
| ASV_16s_3548 | 0.927127328 | 16.60000709  | 3.551452304 | 0.197172771 | NA          | NA |
| ASV_16s_3551 | 1.346511255 | 0.200274277  | 3.548377267 | 2.827456658 | 0.900491896 | NA |
| ASV_16s_3552 | 1.353497018 | -0.167772263 | 3.548180453 | 3.017921655 | 0.883339394 | NA |
| ASV_16s_3553 | 1.411103926 | 0.54737307   | 3.546311694 | 2.588428847 | 0.920292408 | NA |
| ASV_16s_3554 | 1.38859063  | 0.633194819  | 3.547281525 | 3.460221413 | 0.839420655 | NA |
| ASV_16s_3555 | 1.509938133 | 0.376249803  | 3.036881697 | 4.857648917 | 0.677330022 | NA |
| ASV_16s_3556 | 1.426369997 | 0.069944868  | 3.352879569 | 2.644375471 | 0.915838918 | NA |
| ASV_16s_3557 | 1.771148668 | -0.054310179 | 2.680977395 | 4.855571895 | 0.677583239 | NA |
| ASV_16s_3558 | 2.139203598 | 1.615008753  | 3.548628564 | 2.266503888 | 0.943630763 | 1  |
| ASV_16s_3559 | 2.007006785 | 0.794429662  | 3.54810457  | 2.243135217 | 0.945167513 | 1  |
| ASV_16s_3560 | 1.313820373 | -0.499041886 | 3.547556375 | 2.833012437 | 0.900008234 | NA |
| ASV_16s_3561 | 1.421033604 | 0.593922624  | 3.547646079 | 3.554446637 | 0.829425362 | NA |
| ASV_16s_3562 | 1.529224738 | 0.016661785  | 3.546803893 | 3.316222545 | 0.854290416 | NA |
| ASV_16s_3563 | 1.427277985 | 0.832052946  | 3.078951667 | 4.180365675 | 0.758784293 | NA |

|              |             |              |             |             |             |    |
|--------------|-------------|--------------|-------------|-------------|-------------|----|
| ASV_16s_3564 | 1.585613661 | -0.795678233 | 3.548015387 | 2.686044032 | 0.912448855 | NA |
| ASV_16s_3565 | 1.6415265   | 1.86194214   | 2.619680665 | 4.536606655 | 0.716304849 | NA |
| ASV_16s_3566 | 1.519345086 | -1.769899091 | 3.442570596 | 1.693896291 | 0.97482886  | NA |
| ASV_16s_3567 | 1.367988444 | -1.237672673 | 3.547876779 | 2.173253072 | 0.949631931 | NA |
| ASV_16s_3568 | 1.793519428 | 1.212975     | 2.958758643 | 2.433817922 | 0.931997649 | NA |
| ASV_16s_3569 | 1.345531953 | 0.438320152  | 3.549928312 | 0.813481779 | NA          | NA |
| ASV_16s_3570 | 1.388773467 | -2.465925333 | 3.546089293 | 0.62163305  | NA          | NA |
| ASV_16s_3571 | 1.332609018 | -0.053920099 | 3.548017018 | 3.327896709 | 0.853104138 | NA |
| ASV_16s_3572 | 1.281755389 | -1.39903987  | 3.306483881 | 1.616940153 | 0.977982946 | NA |
| ASV_16s_3573 | 1.723421781 | 0.643687836  | 3.489185933 | 3.465744034 | 0.838840408 | NA |
| ASV_16s_3574 | 1.333871335 | 17.2274488   | 3.551445747 | 0.410209286 | NA          | NA |
| ASV_16s_3575 | 1.613901279 | 17.2387034   | 3.551444857 | 0.531618295 | 0.999322275 | NA |
| ASV_16s_3576 | 1.215056616 | -0.358649449 | 3.549122683 | 2.782520514 | NA          | NA |
| ASV_16s_3577 | 0.266894269 | -0.17015492  | 3.550605975 | 0.948715668 | NA          | NA |
| ASV_16s_3578 | 1.469673564 | -0.901883855 | 2.415506638 | 4.604455936 | 0.708105248 | NA |
| ASV_16s_3579 | 1.494288733 | -0.793613215 | 3.548453084 | 2.630167233 | 0.916980664 | NA |
| ASV_16s_3580 | 1.850478879 | 0.519598067  | 2.866612769 | 5.692417247 | 0.576087449 | NA |
| ASV_16s_3581 | 0.782795009 | 0.702026183  | 3.548372168 | 2.287016997 | NA          | NA |
| ASV_16s_3582 | 1.107336148 | 1.016936782  | 3.547669255 | 1.778078496 | 0.971096809 | NA |
| ASV_16s_3583 | 1.470228485 | 0.648069713  | 3.45556872  | 1.677379663 | NA          | NA |
| ASV_16s_3584 | 1.688745027 | 0.512522334  | 3.348540406 | 3.145151604 | 0.871257624 | NA |
| ASV_16s_3585 | 2.170248741 | -0.028452271 | 2.946043129 | 4.989105222 | 0.661292842 | 1  |
| ASV_16s_3586 | 1.909699953 | 0.773880677  | 3.549282668 | 3.082821901 | 0.877236237 | NA |
| ASV_16s_3587 | 1.727552001 | 1.16130802   | 3.550032571 | 1.639296043 | 0.977091931 | NA |
| ASV_16s_3588 | 1.714891873 | 0.694035272  | 3.550595572 | 1.967095132 | 0.961639084 | NA |
| ASV_16s_3589 | 1.33399054  | -0.301018053 | 3.5491053   | 2.944315879 | 0.890105221 | NA |
| ASV_16s_3590 | 0.382673596 | -0.170278604 | 3.550575753 | 1.130937177 | NA          | NA |
| ASV_16s_3591 | 1.281132482 | 0.137627365  | 3.548457246 | 3.164172646 | 0.869410874 | NA |
| ASV_16s_3592 | 1.313338664 | 0.038160558  | 3.548102326 | 3.171816954 | 0.868665805 | NA |
| ASV_16s_3593 | 1.354267172 | -0.405715744 | 3.548212708 | 2.542949209 | 0.923828372 | NA |
| ASV_16s_3594 | 1.306164177 | -0.306771037 | 3.547917591 | 3.335245674 | 0.852355578 | NA |
| ASV_16s_3595 | 1.405427267 | -0.449248677 | 3.547129459 | 3.257676083 | 0.860186177 | NA |
| ASV_16s_3596 | 1.515020306 | -1.257329826 | 2.720884016 | 3.131390352 | 0.872587268 | NA |
| ASV_16s_3597 | 1.611245554 | -0.796240902 | 3.547904177 | 2.651213787 | 0.915286819 | NA |
| ASV_16s_3598 | 1.210922703 | 2.277474995  | 3.326615114 | 2.863368492 | 0.897347465 | NA |
| ASV_16s_3599 | 1.755985852 | -1.177597212 | 3.545321307 | 2.859165204 | 0.897717708 | NA |
| ASV_16s_3600 | 1.537303883 | -0.86186217  | 3.547505168 | 2.260645829 | 0.944018048 | NA |
| ASV_16s_3601 | 1.512264658 | -0.893440584 | 2.836932003 | 3.704475723 | 0.813117036 | NA |
| ASV_16s_3602 | 1.552174424 | -0.833640137 | 2.534652485 | 5.679036029 | 0.577685679 | NA |
| ASV_16s_3603 | 1.532613819 | 2.407200484  | 3.547367223 | 1.138130421 | 0.992282377 | NA |
| ASV_16s_3604 | 1.425026491 | 0.299779455  | 2.372044066 | 5.444424599 | 0.605895507 | NA |
| ASV_16s_3605 | 2.077502279 | 0.419408244  | 3.549153081 | 1.363542892 | NA          | NA |
| ASV_16s_3606 | 1.733897578 | 3.437953008  | 3.550929343 | 1.629002351 | NA          | NA |
| ASV_16s_3607 | 1.677861581 | 0.282233018  | 3.550556243 | 2.139466006 | 0.951719413 | NA |
| ASV_16s_3608 | 1.226140463 | -0.149042322 | 3.5491582   | 2.889896519 | NA          | NA |
| ASV_16s_3609 | 1.210985269 | -0.266030242 | 3.549139446 | 2.875036944 | NA          | NA |
| ASV_16s_3610 | 0.586359205 | 0.197887979  | 3.550599714 | 3.153581552 | 0.87044043  | NA |
| ASV_16s_3611 | 1.271767712 | -0.404561879 | 3.549115462 | 2.761375123 | 0.90616491  | NA |
| ASV_16s_3612 | 1.483355145 | -0.795696861 | 3.548018456 | 2.618186896 | 0.91793772  | NA |
| ASV_16s_3613 | 1.520264026 | 1.393936363  | 2.465009036 | 5.520074778 | 0.596763589 | NA |
| ASV_16s_3614 | 2.072878471 | -0.728202026 | 3.386081059 | 3.30040179  | 0.855892446 | 1  |
| ASV_16s_3615 | 1.883224575 | 1.208701389  | 3.547103176 | 2.561419112 | NA          | NA |
| ASV_16s_3616 | 1.520681769 | -0.210319723 | 2.783041779 | 3.723137016 | 0.811057047 | NA |
| ASV_16s_3617 | 1.378968693 | 0.385950607  | 2.59023908  | 4.809483138 | 0.683199866 | NA |
| ASV_16s_3618 | 1.887074664 | 2.403018152  | 2.640345243 | 3.455539365 | 0.839912027 | NA |
| ASV_16s_3619 | 1.225979445 | 0.720446204  | 3.547994414 | 3.074577187 | NA          | NA |
| ASV_16s_3620 | 1.355572776 | -0.386941625 | 3.547225717 | 2.799496245 | 0.902910304 | NA |
| ASV_16s_3621 | 1.329685543 | -0.41831511  | 3.548281236 | 2.538735388 | 0.924152116 | NA |
| ASV_16s_3622 | 1.221417076 | -0.341342601 | 3.547900964 | 2.107966687 | NA          | NA |
| ASV_16s_3623 | 1.470422423 | 0.525327294  | 3.547006815 | 3.396422007 | 0.846071502 | NA |
| ASV_16s_3624 | 1.42543144  | -0.944277951 | 3.547131235 | 2.102348576 | 0.953958904 | NA |
| ASV_16s_3625 | 1.532837671 | -0.795313647 | 3.54809234  | 2.665890646 | 0.914096216 | NA |
| ASV_16s_3626 | 1.612206915 | -0.916037907 | 3.020891571 | 2.701672728 | 0.911161454 | NA |
| ASV_16s_3627 | 1.408697526 | 0.219682484  | 3.548028647 | 3.555055801 | NA          | NA |
| ASV_16s_3628 | 1.239329503 | 0.057818195  | 3.549924887 | 1.523517331 | 0.981484304 | NA |
| ASV_16s_3629 | 1.603705779 | 0.743525119  | 3.549197085 | 1.006607257 | NA          | NA |
| ASV_16s_3630 | 1.028173375 | 0.273965025  | 3.549103135 | 2.16373794  | 0.950224511 | NA |

|              |             |              |             |             |             |    |
|--------------|-------------|--------------|-------------|-------------|-------------|----|
| ASV_16s_3631 | 1.447009037 | -2.507834589 | 3.545982732 | 0.623351188 | 0.998857882 | NA |
| ASV_16s_3632 | 0.850204131 | 0.469176372  | 3.550627139 | 1.592566758 | 0.978930905 | NA |
| ASV_16s_3633 | 1.114525261 | 1.501852751  | 3.547224011 | 1.591014999 | NA          | NA |
| ASV_16s_3634 | 0.492372174 | 0.227307866  | 3.551113292 | 0.939695474 | NA          | NA |
| ASV_16s_3635 | 0.862288405 | -0.002097968 | 3.549155726 | 2.070699385 | 0.955823803 | NA |
| ASV_16s_3636 | 1.68503804  | 0.694034112  | 3.55059634  | 1.95814107  | 0.962120756 | NA |
| ASV_16s_3637 | 0.424398937 | -0.682226793 | 3.549784093 | 0.937792881 | NA          | NA |
| ASV_16s_3638 | 1.395616654 | 1.775580413  | 3.292785994 | 3.291384161 | 0.856802673 | NA |
| ASV_16s_3639 | 1.597336058 | -0.935651635 | 3.248128475 | 3.653556487 | 0.818703468 | NA |
| ASV_16s_3640 | 1.490111413 | 0.24324299   | 3.548540214 | 2.747201759 | NA          | NA |
| ASV_16s_3641 | 1.391876969 | -0.071721546 | 3.549481938 | 1.980256292 | 0.960925042 | NA |
| ASV_16s_3642 | 1.109222795 | 1.267108047  | 3.547176034 | 1.972557761 | NA          | NA |
| ASV_16s_3643 | 1.064682403 | -9.540079557 | 3.548371375 | 0.54254655  | NA          | NA |
| ASV_16s_3644 | 1.598203587 | 0.34249893   | 3.550629026 | 1.453721568 | 0.983868713 | NA |
| ASV_16s_3645 | 1.216315193 | -0.317198804 | 3.549128502 | 2.837079304 | NA          | NA |
| ASV_16s_3646 | 1.28716662  | -0.356567384 | 3.54910622  | 2.842510694 | 0.899178975 | NA |
| ASV_16s_3647 | 1.406997989 | -0.201250472 | 3.54790284  | 3.606557044 | 0.8238136   | NA |
| ASV_16s_3648 | 1.487763338 | -0.796245056 | 3.54791811  | 2.545861645 | 0.923604226 | NA |
| ASV_16s_3649 | 1.533348315 | -0.667283663 | 2.271889275 | 5.07530207  | 0.650774112 | NA |
| ASV_16s_3650 | 1.211817608 | 1.166595513  | 3.5488768   | 1.443804269 | 0.984191645 | NA |
| ASV_16s_3651 | 1.613700732 | -0.498679365 | 3.527917184 | 4.184938087 | 0.758246838 | NA |
| ASV_16s_3652 | 1.635871449 | 0.403710236  | 3.549293138 | 1.356020917 | NA          | NA |
| ASV_16s_3653 | 1.620407093 | 1.043650955  | 3.549347605 | 1.66207715  | 0.97616272  | NA |
| ASV_16s_3654 | 1.19783085  | -0.328729664 | 3.549131186 | 2.808872027 | NA          | NA |
| ASV_16s_3655 | 1.221674061 | 0.272193884  | 3.548846853 | 2.856370092 | 0.897963591 | NA |
| ASV_16s_3656 | 1.322657257 | -4.28E-04    | 3.547956113 | 3.403995199 | 0.845287142 | NA |
| ASV_16s_3657 | 1.301171169 | 1.117454036  | 3.54667427  | 2.948533746 | 0.889722094 | NA |
| ASV_16s_3658 | 1.459226134 | -0.178830219 | 3.136528996 | 2.843846958 | 0.89906207  | NA |
| ASV_16s_3659 | 1.562338918 | -0.499571896 | 3.549363942 | 2.244072027 | 0.945106328 | NA |
| ASV_16s_3660 | 1.401683869 | -0.312969376 | 3.54825004  | 3.077254472 | 0.877764733 | NA |
| ASV_16s_3661 | 1.456610631 | -0.568252483 | 3.548959337 | 1.312639413 | NA          | NA |
| ASV_16s_3662 | 0.835427166 | 0.222414842  | 3.550625797 | 1.366902195 | 0.986563519 | NA |
| ASV_16s_3663 | 1.399992595 | 0.929971869  | 3.544662436 | 1.711661192 | NA          | NA |
| ASV_16s_3664 | 1.563891438 | 0.885800336  | 3.548891129 | 2.011947983 | 0.959176114 | NA |
| ASV_16s_3665 | 0.42002369  | -0.682178275 | 3.549794964 | 0.93445531  | NA          | NA |
| ASV_16s_3666 | 0.260561185 | -0.170145794 | 3.550608403 | 0.936627387 | NA          | NA |
| ASV_16s_3667 | 1.452978697 | -0.088821457 | 3.547068066 | 3.165945398 | 0.869238236 | NA |
| ASV_16s_3668 | 1.671056703 | 0.086627017  | 3.546729785 | 3.503900638 | 0.834812159 | NA |
| ASV_16s_3669 | 1.458250094 | -0.805339393 | 3.049298527 | 2.840794796 | 0.899329006 | NA |
| ASV_16s_3670 | 1.329639455 | 1.511773953  | 3.546847494 | 1.782169646 | 0.970907905 | NA |
| ASV_16s_3671 | 1.085787023 | -0.251312489 | 3.548858768 | 2.528600467 | 0.924928067 | NA |
| ASV_16s_3672 | 1.353954477 | 0.617085605  | 3.549032443 | 2.757151728 | NA          | NA |
| ASV_16s_3673 | 1.569560694 | 0.352790224  | 3.550505688 | 1.337140426 | 0.987419286 | NA |
| ASV_16s_3674 | 1.215636821 | -0.317049648 | 3.549128696 | 2.836670045 | 0.899689257 | NA |
| ASV_16s_3675 | 1.373982393 | 0.298936246  | 3.546942091 | 3.282766401 | 0.857670549 | NA |
| ASV_16s_3676 | 1.513092432 | -0.79601866  | 3.547954157 | 2.608390814 | 0.918716421 | NA |
| ASV_16s_3677 | 1.783273361 | 0.490094945  | 3.549322855 | 2.692486952 | 0.911919168 | NA |
| ASV_16s_3678 | 1.610769392 | 0.335864815  | 3.550630912 | 2.766239061 | 0.905752411 | NA |
| ASV_16s_3679 | 1.214210049 | 0.102879809  | 3.548275357 | 3.20311246  | 0.865598463 | NA |
| ASV_16s_3680 | 1.282258408 | 1.185679901  | 3.5468759   | 2.96134447  | 0.888554999 | NA |
| ASV_16s_3681 | 0.84904653  | -0.566942503 | 3.550204169 | 1.846165414 | 0.967861954 | NA |
| ASV_16s_3682 | 1.394855863 | -0.750762914 | 3.547260815 | 2.591158584 | 0.920077756 | NA |
| ASV_16s_3683 | 1.43591478  | -0.059233996 | 3.542469604 | 1.220062345 | NA          | NA |
| ASV_16s_3684 | 0.391144358 | 0.219987951  | 3.550650506 | 1.116488881 | NA          | NA |
| ASV_16s_3685 | 1.287558475 | -0.865593458 | 3.547571787 | 2.122863407 | 0.952728109 | NA |
| ASV_16s_3686 | 1.232549656 | -1.05049527  | 3.546334799 | 2.470006276 | NA          | NA |
| ASV_16s_3687 | 1.524494578 | -0.60339056  | 2.882956948 | 4.729524649 | 0.692931127 | NA |
| ASV_16s_3688 | 1.072083228 | -1.630246383 | 3.548174493 | 1.914650676 | 0.964412748 | NA |
| ASV_16s_3689 | 1.288264346 | 2.404366984  | 2.470188475 | 4.312899818 | 0.743114177 | NA |
| ASV_16s_3690 | 2.022513705 | 3.294920448  | 3.546752391 | 0.737419946 | NA          | NA |
| ASV_16s_3691 | 2.333769936 | -0.759781108 | 3.546194484 | 2.634368655 | NA          | NA |
| ASV_16s_3692 | 1.239116235 | 0.789711689  | 3.549281398 | 1.567724759 | NA          | NA |
| ASV_16s_3693 | 1.308745048 | -1.593694729 | 3.547236017 | 1.40767726  | 0.985334956 | NA |
| ASV_16s_3694 | 1.504511774 | 0.215929092  | 3.549390774 | 4.436350079 | 0.728367624 | NA |
| ASV_16s_3695 | 1.604249875 | 17.23209723  | 3.551444891 | 0.527928875 | 0.999337655 | NA |
| ASV_16s_3696 | 0.73358026  | -13.57275479 | 3.552157344 | 0.094052453 | 0.999998131 | NA |
| ASV_16s_3698 | 1.262964626 | 0.044467078  | 3.548146582 | 3.283505311 | 0.857596211 | NA |

|              |             |              |             |              |             |    |
|--------------|-------------|--------------|-------------|--------------|-------------|----|
| ASV_16s_3699 | 1.241751907 | 0.121887617  | 3.547945761 | 3.539233799  | NA          | NA |
| ASV_16s_3700 | 0.957720363 | 2.399263144  | 3.372738542 | 1.436174113  | NA          | NA |
| ASV_16s_3701 | 1.900333039 | 0.419397681  | 3.549175965 | 1.334774926  | NA          | NA |
| ASV_16s_3702 | 1.71669569  | 6.54886939   | 3.55025371  | 1.143249938  | 0.992175405 | NA |
| ASV_16s_3703 | 0.412731612 | -0.682091125 | 3.549813587 | 0.928814529  | NA          | NA |
| ASV_16s_3704 | 1.267592717 | 0.590396476  | 3.548066934 | 2.999630477  | 0.885036413 | NA |
| ASV_16s_3705 | 1.29575731  | 0.06186484   | 3.547931652 | 3.521749396  | 0.83291647  | NA |
| ASV_16s_3706 | 1.529351291 | 1.774652845  | 2.873400427 | 3.304502594  | 0.855477816 | NA |
| ASV_16s_3707 | 1.639720902 | 3.165486156  | 3.546769671 | 1.21024121   | 0.990689181 | NA |
| ASV_16s_3708 | 1.46990417  | -1.748976381 | 2.610443557 | 1.492624605  | 0.982563897 | NA |
| ASV_16s_3709 | 1.564050287 | 0.372005789  | 3.549325695 | 2.772911842  | 0.905185189 | NA |
| ASV_16s_3710 | 1.300739027 | 0.441804956  | 3.55021562  | 0.738738308  | NA          | NA |
| ASV_16s_3711 | 1.005542767 | 1.502508774  | 3.548325655 | 1.103491332  | 0.992981988 | NA |
| ASV_16s_3712 | 1.191794131 | -0.069811226 | 3.549476991 | 2.787920687  | 0.903903802 | NA |
| ASV_16s_3713 | 1.491070027 | 0.139195989  | 2.896118319 | 4.533905974  | 0.71663067  | NA |
| ASV_16s_3714 | 1.74910272  | 0.655438966  | 3.533898557 | 1.743154138  | 0.972680961 | NA |
| ASV_16s_3715 | 1.752267871 | 0.680489667  | 3.549418236 | 2.679538529  | 0.912982197 | NA |
| ASV_16s_3716 | 0.415341148 | 0.38036709   | 3.55049258  | 2.457765657  | 0.930243634 | NA |
| ASV_16s_3717 | 1.303025624 | 0.017155233  | 3.548023075 | 3.345456679  | 0.851313215 | NA |
| ASV_16s_3718 | 1.228053356 | -0.863873774 | 3.547315025 | 2.019908267  | NA          | NA |
| ASV_16s_3719 | 1.453842759 | -0.795320894 | 3.548095357 | 2.616987131  | 0.918033278 | NA |
| ASV_16s_3720 | 1.598156768 | -0.118736234 | 3.549930313 | 2.3044868    | 0.941086479 | NA |
| ASV_16s_3721 | 1.346204881 | -1.067575092 | 3.547703357 | 1.40625934   | NA          | NA |
| ASV_16s_3722 | 1.863558037 | 0.760750757  | 3.549286366 | 3.177843081  | 0.868077297 | NA |
| ASV_16s_3723 | 1.740030696 | 0.968090826  | 3.549353964 | 2.377426684  | 0.93604077  | NA |
| ASV_16s_3724 | 1.660491421 | 17.30179405  | 3.55078781  | 0.371884537  | 0.999793648 | NA |
| ASV_16s_3725 | 0.798810827 | 2.051493591  | 3.548888893 | 0.746145     | 0.997955515 | NA |
| ASV_16s_3726 | 1.250140723 | 0.188726463  | 3.548150017 | 3.351566156  | 0.850688284 | NA |
| ASV_16s_3727 | 1.400070895 | 0.369898078  | 3.547886403 | 2.580918089  | 0.920881607 | NA |
| ASV_16s_3728 | 1.277611861 | 0.749896764  | 3.546911001 | 3.111749129  | 0.874475601 | NA |
| ASV_16s_3729 | 1.297024557 | -0.817621327 | 3.547249551 | 2.050515198  | 0.956991587 | NA |
| ASV_16s_3730 | 1.560193427 | -0.157424705 | 3.548032387 | 3.084936085  | 0.877035305 | NA |
| ASV_16s_3731 | 0.851398079 | -26.77177667 | 3.551346016 | -0.062827898 | 1           | NA |
| ASV_16s_3732 | 1.041554055 | 0.98248715   | 3.547657146 | 1.654912658  | 0.976457265 | NA |
| ASV_16s_3733 | 1.072279641 | 0.371496889  | 3.547967645 | 2.913025384  | 0.892929788 | NA |
| ASV_16s_3734 | 1.035231804 | 0.505319792  | 3.548942278 | 2.228120819  | NA          | NA |
| ASV_16s_3735 | 0.644004717 | 0.540777234  | 3.551363661 | 0.681500568  | NA          | NA |
| ASV_16s_3736 | 1.567613754 | 0.381983794  | 3.550286978 | 0.983460773  | 0.995090943 | NA |
| ASV_16s_3737 | 1.571106545 | 0.334246938  | 3.550602301 | 1.771949018  | 0.971378522 | NA |
| ASV_16s_3738 | 1.616492284 | 1.159372013  | 3.550044552 | 1.608669756  | 0.978307348 | NA |
| ASV_16s_3739 | 0.380142116 | 0.19165599   | 3.55064386  | 1.445154819  | NA          | NA |
| ASV_16s_3740 | 1.231237119 | 0.074906395  | 3.548645795 | 3.004140793  | 0.88461891  | NA |
| ASV_16s_3741 | 1.241043539 | 0.064120256  | 3.548569745 | 3.028951153  | 0.882311152 | NA |
| ASV_16s_3742 | 1.305812015 | -0.263717528 | 3.548292412 | 2.674413611  | 0.913401298 | NA |
| ASV_16s_3743 | 1.200726679 | 0.136830215  | 3.548314713 | 3.185264455  | 0.867351131 | NA |
| ASV_16s_3744 | 1.341769115 | -2.330095963 | 3.3214539   | 2.532263786  | 0.924648037 | NA |
| ASV_16s_3745 | 1.383923825 | -0.398875959 | 3.548194025 | 3.447934228  | 0.840709076 | NA |
| ASV_16s_3746 | 1.153459312 | -1.39001177  | 3.367414719 | 2.137116496  | 0.951862842 | NA |
| ASV_16s_3747 | 1.646830819 | 0.513457031  | 2.4416698   | 8.817126187  | 0.266053728 | NA |
| ASV_16s_3748 | 1.586586863 | 1.030478635  | 3.550192521 | 3.006359962  | 0.88441326  | NA |
| ASV_16s_3749 | 0.283133235 | -0.170173123 | 3.550600252 | 0.978425328  | 0.995169098 | NA |
| ASV_16s_3750 | 1.530504404 | -0.796348649 | 3.547896901 | 2.561709889  | 0.92237901  | NA |
| ASV_16s_3751 | 1.928621471 | 0.271436201  | 3.5492166   | 1.406259332  | NA          | NA |
| ASV_16s_3752 | 0.580752192 | -0.685681555 | 3.549877083 | 1.722040025  | 0.973614017 | NA |
| ASV_16s_3753 | 1.27598299  | -4.198595913 | 3.55005992  | 0.534549525  | NA          | NA |
| ASV_16s_3754 | 1.734225148 | 0.466376457  | 3.547971929 | 2.704236144  | 0.910949474 | NA |
| ASV_16s_3755 | 0.504428368 | -12.45198107 | 3.552157344 | -0.135304816 | NA          | NA |
| ASV_16s_3756 | 1.204506705 | 0.040653426  | 3.548569822 | 2.971782307  | 0.887600266 | NA |
| ASV_16s_3757 | 1.30609221  | -0.120054065 | 3.547659255 | 2.400610116  | 0.93439346  | NA |
| ASV_16s_3758 | 1.151762727 | 0.811813273  | 3.547873259 | 2.695846174  | 0.911642418 | NA |
| ASV_16s_3759 | 1.27760493  | 0.710479742  | 3.547669218 | 3.167315634  | 0.869104735 | NA |
| ASV_16s_3760 | 1.197929608 | 0.854951401  | 3.547535762 | 2.967082912  | 0.888030535 | NA |
| ASV_16s_3761 | 1.32420172  | 1.065489451  | 3.547099583 | 3.043750411  | 0.880925664 | NA |
| ASV_16s_3762 | 1.279648691 | 0.233806573  | 3.282588696 | 3.644660445  | 0.819674176 | NA |
| ASV_16s_3763 | 0.923415497 | 1.415246018  | 3.547326345 | 2.477146176  | 0.928808126 | NA |
| ASV_16s_3764 | 1.534935715 | -0.69918585  | 2.305111159 | 6.605018551  | 0.471129126 | NA |
| ASV_16s_3765 | 1.481731917 | -0.246351416 | 3.548464668 | 3.400689115  | 0.845629727 | NA |

|              |             |              |             |              |             |    |
|--------------|-------------|--------------|-------------|--------------|-------------|----|
| ASV_16s_3766 | 1.234980109 | -0.088886251 | 3.549373228 | 2.503285992  | 0.926849423 | NA |
| ASV_16s_3767 | 1.308211459 | 1.982613228  | 2.478294187 | 4.479505823  | 0.723183694 | NA |
| ASV_16s_3768 | 1.126221619 | 1.994652472  | 3.547139893 | 1.284388792  | 0.988852345 | NA |
| ASV_16s_3769 | 1.776502432 | 0.732249493  | 3.549288935 | 3.060745061  | 0.879326502 | NA |
| ASV_16s_3770 | 1.482344445 | 0.315939234  | 3.550635728 | 1.958425769  | 0.962105493 | NA |
| ASV_16s_3771 | 1.227606478 | -0.312044504 | 3.549126684 | 2.851543842  | 0.898387545 | NA |
| ASV_16s_3772 | 0.502613877 | -12.65768009 | 3.552157344 | -0.137523539 | NA          | NA |
| ASV_16s_3773 | 1.228210817 | 1.040145002  | 3.547462467 | 2.991724221  | 0.885766752 | NA |
| ASV_16s_3774 | 1.440218921 | -0.795531218 | 3.54805472  | 2.598512319  | 0.919498141 | NA |
| ASV_16s_3775 | 1.109213399 | 0.410035327  | 3.428339872 | 1.467919975  | NA          | NA |
| ASV_16s_3776 | 1.612672253 | -1.533693789 | 3.546267827 | 2.92775297   | 0.891604235 | NA |
| ASV_16s_3777 | 1.382590096 | -0.319995857 | 3.546774867 | 3.135815743  | 0.872160269 | NA |
| ASV_16s_3778 | 1.578354427 | 0.694021229  | 3.550599321 | 1.924789694  | 0.963885461 | NA |
| ASV_16s_3779 | 1.196035963 | 0.031304405  | 3.548681612 | 2.929752962  | 0.891423691 | NA |
| ASV_16s_3780 | 1.222558691 | -0.001893001 | 3.548432541 | 2.989706038  | 0.885952871 | NA |
| ASV_16s_3781 | 1.169804668 | 0.030991096  | 3.548195908 | 3.13545782   | 0.872194825 | NA |
| ASV_16s_3782 | 1.214358573 | 0.077762121  | 3.548320117 | 2.787606048  | 0.903930744 | NA |
| ASV_16s_3783 | 1.357963538 | -0.526568446 | 3.54798805  | 2.469075435  | NA          | NA |
| ASV_16s_3784 | 1.469571592 | -0.797800141 | 3.215935285 | 3.110034769  | 0.874639891 | NA |
| ASV_16s_3785 | 1.490519877 | -0.925013853 | 3.547316708 | 2.195647448  | 0.948222757 | NA |
| ASV_16s_3786 | 1.448128219 | -0.096316509 | 3.549350839 | 1.812933695  | 0.969465017 | NA |
| ASV_16s_3787 | 1.198523499 | -0.32104854  | 3.549132265 | 2.818249521  | 0.901291158 | NA |
| ASV_16s_3788 | 1.140411596 | -0.329655444 | 3.549146222 | 2.759243358  | NA          | NA |
| ASV_16s_3789 | 1.153138781 | 0.632616279  | 3.548377487 | 3.038320196  | NA          | NA |
| ASV_16s_3790 | 1.305951242 | 0.483965198  | 3.547555464 | 3.354630503  | 0.850374481 | NA |
| ASV_16s_3791 | 1.453127593 | -0.795961897 | 3.547970989 | 2.567918313  | 0.921896509 | NA |
| ASV_16s_3792 | 1.430993928 | -0.795878181 | 3.547989476 | 2.56127215   | 0.922412976 | NA |
| ASV_16s_3793 | 1.440773364 | -0.79560635  | 3.548040522 | 2.594378118  | 0.919824238 | NA |
| ASV_16s_3794 | 1.438271644 | -1.500210715 | 3.056646828 | 2.715195117  | 0.910040628 | NA |
| ASV_16s_3795 | 1.599405583 | -0.353770606 | 3.273933912 | 3.52394672   | 0.832682602 | NA |
| ASV_16s_3796 | 1.429970789 | 0.186442591  | 3.548011321 | 3.337784332  | 0.852096673 | NA |
| ASV_16s_3797 | 0.824864721 | 0.229030458  | 3.550622295 | 1.108678088  | 0.992879894 | NA |
| ASV_16s_3798 | 2.121575579 | 0.40546367   | 3.549241093 | 1.37009568   | NA          | NA |
| ASV_16s_3799 | 0.852709081 | 16.51234053  | 3.551453587 | 0.145850894  | NA          | NA |
| ASV_16s_3800 | 1.16338283  | -0.442841699 | 3.549129703 | 2.569022695  | 0.921810531 | NA |
| ASV_16s_3801 | 0.399605872 | -0.681938019 | 3.54984881  | 0.918407701  | NA          | NA |
| ASV_16s_3802 | 1.303085479 | -1.265346971 | 3.547952755 | 2.213572077  | 0.947080213 | NA |
| ASV_16s_3803 | 1.220280621 | 0.233592597  | 3.547325125 | 3.209433723  | 0.864975603 | NA |
| ASV_16s_3804 | 1.523998495 | 3.560264813  | 2.968935821 | 0.939759989  | NA          | NA |
| ASV_16s_3805 | 1.2536192   | -1.480636664 | 3.546698254 | 1.28625057   | 0.988803573 | NA |
| ASV_16s_3806 | 1.14927563  | -0.069806821 | 3.549541134 | 2.697304684  | 0.911522135 | NA |
| ASV_16s_3807 | 1.574368538 | 2.248894725  | 2.478084647 | 3.311092207  | 0.85481063  | NA |
| ASV_16s_3808 | 1.189240687 | 2.293418622  | 3.547916176 | 1.517104719  | NA          | NA |
| ASV_16s_3809 | 1.584125598 | -6.57647149  | 3.55010872  | 1.469364495  | 0.983351347 | NA |
| ASV_16s_3810 | 1.458915149 | 0.700001919  | 3.548436917 | 1.749628125  | 0.972391147 | NA |
| ASV_16s_3811 | 0.215422894 | -0.17005824  | 3.550629821 | 0.841489276  | 0.996997127 | NA |
| ASV_16s_3812 | 1.341687895 | 0.138260167  | 3.103661933 | 3.685321337  | 0.815224476 | NA |
| ASV_16s_3813 | 1.399191978 | 0.253783376  | 3.109703983 | 2.643615982  | 0.915900133 | NA |
| ASV_16s_3814 | 1.505570013 | -0.92534931  | 3.547038587 | 2.120417419  | 0.952875763 | NA |
| ASV_16s_3815 | 1.447573023 | -0.795651897 | 3.548030115 | 2.59573828   | 0.91971702  | NA |
| ASV_16s_3816 | 1.344886961 | -1.013455939 | 3.548225784 | 1.272384832  | 0.989163662 | NA |
| ASV_16s_3817 | 1.479031062 | 0.964329388  | 2.240161426 | 7.366757045  | 0.391717218 | NA |
| ASV_16s_3818 | 1.394032414 | 2.373924349  | 3.548100473 | 0.775471779  | NA          | NA |
| ASV_16s_3819 | 1.630031251 | 0.734644431  | 3.548927741 | 1.767301628  | 0.971591073 | NA |
| ASV_16s_3820 | 1.762369748 | 0.89258529   | 3.549351286 | 2.551224049  | 0.923190704 | NA |
| ASV_16s_3821 | 0.381968076 | -0.004827067 | 3.550596962 | 2.055891281  | 0.956682189 | NA |
| ASV_16s_3822 | 0.314034443 | -0.170217154 | 3.550590987 | 1.030784703  | NA          | NA |
| ASV_16s_3823 | 1.153964362 | 0.090284442  | 3.548349765 | 3.102424185  | 0.875368192 | NA |
| ASV_16s_3824 | 1.545961527 | 0.51691685   | 3.382663359 | 2.713384566  | 0.91019107  | NA |
| ASV_16s_3825 | 1.488725505 | 0.39888394   | 3.549173588 | 2.903964727  | 0.893741828 | NA |
| ASV_16s_3826 | 1.171727796 | 0.778346574  | 3.547052053 | 2.771421628  | 0.905311997 | NA |
| ASV_16s_3827 | 1.194138978 | 1.539999239  | 3.547084975 | 2.868171558  | NA          | NA |
| ASV_16s_3828 | 1.712179659 | 2.673571243  | 3.547476247 | 1.350932078  | 0.987026994 | NA |
| ASV_16s_3829 | 0.395230625 | -0.681883329 | 3.549861065 | 0.914862779  | NA          | NA |
| ASV_16s_3830 | 0.697551737 | -13.97346556 | 3.552157344 | 0.063163937  | 0.99999953  | NA |
| ASV_16s_3831 | 1.257957854 | 0.092210092  | 3.54792105  | 3.611514816  | 0.823276703 | NA |
| ASV_16s_3832 | 0.986698204 | -1.067479384 | 3.16239267  | 2.369978812  | 0.936565545 | NA |



|              |             |              |             |             |             |    |
|--------------|-------------|--------------|-------------|-------------|-------------|----|
| ASV_16s_3833 | 1.371447962 | -0.794724092 | 3.54822357  | 2.575819353 | 0.92128041  | NA |
| ASV_16s_3834 | 1.198398859 | 0.311745535  | 3.548288801 | 3.027251805 | 0.882469818 | NA |
| ASV_16s_3835 | 1.243798371 | -1.575884144 | 3.544654979 | 1.211059449 | NA          | NA |
| ASV_16s_3836 | 1.280144832 | 0.385040463  | 3.55158819  | 0.518636158 | 0.999375342 | NA |
| ASV_16s_3837 | 1.348492564 | 0.831215381  | 3.547249279 | 2.486487615 | 0.928111119 | NA |
| ASV_16s_3838 | 0.781330854 | 0.223986574  | 3.550639161 | 1.265879886 | 0.989330096 | NA |
| ASV_16s_3839 | 1.43502445  | -2.029210407 | 3.545041392 | 1.598091418 | 0.978718175 | NA |
| ASV_16s_3840 | 1.24477309  | -15.41375623 | 3.552157344 | 0.192280209 | 0.999978016 | NA |
| ASV_16s_3841 | 1.358205549 | 0.432557479  | 3.550635799 | 3.522519905 | 0.832834475 | NA |
| ASV_16s_3842 | 1.744755122 | 1.187770094  | 3.549530681 | 1.515243873 | 0.98177722  | NA |
| ASV_16s_3843 | 1.178629719 | 0.166149825  | 3.548675009 | 3.035107369 | 0.881735621 | NA |
| ASV_16s_3844 | 1.358948065 | -0.04634972  | 2.911104094 | 4.468159611 | 0.724547926 | NA |
| ASV_16s_3845 | 1.381550583 | 0.090597472  | 3.548015121 | 3.593519303 | 0.825223051 | NA |
| ASV_16s_3846 | 1.3356967   | -1.035429959 | 3.547147545 | 2.064108433 | 0.95620698  | NA |
| ASV_16s_3847 | 1.425341368 | -0.836905263 | 3.548199757 | 2.418240787 | 0.93312677  | NA |
| ASV_16s_3848 | 1.35074968  | 0.53498413   | 3.55049558  | 2.951832097 | 0.889422099 | NA |
| ASV_16s_3849 | 1.280342456 | -1.041064952 | 3.275985268 | 3.386173208 | 0.847130745 | NA |
| ASV_16s_3850 | 1.257656217 | 0.333793151  | 3.305128032 | 3.235527019 | 0.862392935 | NA |
| ASV_16s_3851 | 1.606859254 | 0.57096441   | 3.549264454 | 1.604889662 | 0.978454683 | NA |
| ASV_16s_3852 | 1.353635556 | 1.816018317  | 2.7249432   | 2.748063211 | 0.907289702 | NA |
| ASV_16s_3853 | 1.608782793 | 0.369436086  | 3.550441392 | 1.110199608 | 0.992849767 | NA |
| ASV_16s_3854 | 1.520263404 | 0.559952187  | 3.550619429 | 3.62765649  | 0.82152512  | NA |
| ASV_16s_3855 | 1.343043003 | 14.4386932   | 3.551492255 | 1.592708788 | 0.978925452 | NA |
| ASV_16s_3856 | 1.187654632 | 0.687404973  | 3.547876402 | 2.919406499 | 0.89235631  | NA |
| ASV_16s_3857 | 1.425642968 | -0.796535668 | 3.547907702 | 2.319207868 | NA          | NA |
| ASV_16s_3858 | 1.267337563 | 0.50403022   | 3.547240393 | 3.247993249 | 0.861152521 | NA |
| ASV_16s_3859 | 1.426776792 | -0.796006156 | 3.548005886 | 2.56780018  | 0.921905704 | NA |
| ASV_16s_3860 | 1.345121249 | 0.081593725  | 3.547977841 | 3.613813064 | 0.823027642 | NA |
| ASV_16s_3861 | 1.282567753 | 0.544423714  | 3.184120436 | 2.041204762 | 0.957524585 | NA |
| ASV_16s_3862 | 1.151218425 | 0.53772551   | 3.175779943 | 1.693393231 | 0.974850276 | NA |
| ASV_16s_3863 | 0.9921284   | 0.745557708  | 3.549359023 | 2.066196745 | NA          | NA |
| ASV_16s_3864 | 1.256691196 | 0.110807904  | 3.546680417 | 2.913438985 | NA          | NA |
| ASV_16s_3865 | 1.476241827 | -2.20406193  | 3.546424189 | 0.671113389 | NA          | NA |
| ASV_16s_3866 | 1.15553385  | -0.992005392 | 3.54731738  | 2.433907887 | 0.931991101 | NA |
| ASV_16s_3867 | 0.348831713 | -0.170251369 | 3.550582517 | 1.08397608  | NA          | NA |
| ASV_16s_3868 | 1.153826215 | 0.085181063  | 3.5486453   | 2.972633058 | 0.887522298 | NA |
| ASV_16s_3869 | 1.257103522 | -0.87774894  | 3.549302795 | 2.7858605   | 0.904080146 | NA |
| ASV_16s_3870 | 0.710497673 | 1.338925738  | 3.549552977 | 0.998148955 | NA          | NA |
| ASV_16s_3871 | 1.588663082 | 1.197956705  | 3.548361412 | 2.435659006 | NA          | NA |
| ASV_16s_3872 | 0.506631784 | -0.722054757 | 3.549801461 | 1.616868186 | 0.977985781 | NA |
| ASV_16s_3873 | 1.412889854 | 0.17786567   | 3.21175576  | 4.445053019 | 0.727323319 | NA |
| ASV_16s_3874 | 1.528640559 | 0.262929335  | 3.54932207  | 3.920571925 | 0.788879219 | NA |
| ASV_16s_3875 | 1.546810305 | 1.172018989  | 3.549995062 | 1.571859919 | 0.979717087 | NA |
| ASV_16s_3876 | 1.141698231 | -0.240347392 | 3.549161162 | 2.828614721 | 0.900391165 | NA |
| ASV_16s_3877 | 0.429301957 | 0.110801304  | 3.550607067 | 2.464322347 | 0.929759581 | NA |
| ASV_16s_3878 | 0.484468972 | -10.03046878 | 3.552157344 | -0.16001234 | NA          | NA |
| ASV_16s_3879 | 1.192104456 | 0.164427785  | 3.548889375 | 2.968846477 | 0.887869147 | NA |
| ASV_16s_3880 | 1.101103424 | 0.77667187   | 3.548003533 | 2.58745476  | 0.92036894  | NA |
| ASV_16s_3881 | 1.304114266 | 1.847511923  | 3.546586529 | 2.832833005 | 0.900023871 | NA |
| ASV_16s_3882 | 1.147743237 | -0.368396063 | 3.548234404 | 2.357888038 | NA          | NA |
| ASV_16s_3883 | 1.440517969 | -0.796024164 | 3.547961615 | 2.547567702 | 0.923472779 | NA |
| ASV_16s_3884 | 1.461552486 | -0.796072228 | 3.547950852 | 2.558076703 | 0.92266071  | NA |
| ASV_16s_3885 | 1.437132464 | -0.814919865 | 3.01789557  | 3.523560325 | 0.832723735 | NA |
| ASV_16s_3886 | 1.367282923 | -0.926691437 | 3.2582632   | 2.389035077 | 0.935218539 | NA |
| ASV_16s_3887 | 1.412895403 | -0.925799031 | 3.057703739 | 2.762881357 | 0.906037257 | NA |
| ASV_16s_3888 | 1.442170317 | -0.334454657 | 3.547555332 | 3.490484655 | 0.836232308 | NA |
| ASV_16s_3889 | 1.558422339 | 0.034338006  | 2.735512763 | 5.27770647  | 0.626113854 | NA |
| ASV_16s_3890 | 1.114255324 | -2.619835221 | 3.107330386 | 1.786063942 | 0.970727442 | NA |
| ASV_16s_3891 | 1.503619249 | -0.966537434 | 2.717893309 | 2.598714379 | 0.919482187 | NA |
| ASV_16s_3892 | 1.080072126 | -0.836439315 | 3.547787134 | 3.155789197 | NA          | NA |
| ASV_16s_3893 | 1.044287689 | 0.137677705  | 3.544934615 | 1.922154902 | NA          | NA |
| ASV_16s_3894 | 1.473034625 | 2.767979913  | 3.547798594 | 0.769009158 | NA          | NA |
| ASV_16s_3895 | 1.269789367 | -0.386472695 | 3.547183431 | 1.777462229 | NA          | NA |
| ASV_16s_3896 | 1.595655202 | 0.347939532  | 3.549765937 | 2.545844494 | 0.923605547 | NA |
| ASV_16s_3897 | 0.827902998 | 16.48789165  | 3.551454036 | 0.1277493   | NA          | NA |
| ASV_16s_3898 | 1.128007856 | -0.244174716 | 3.549164407 | 2.81535618  | 0.901541739 | NA |
| ASV_16s_3899 | 0.320817341 | -0.140119586 | 3.55059007  | 1.194960771 | 0.991042462 | NA |

|              |             |              |             |              |             |    |
|--------------|-------------|--------------|-------------|--------------|-------------|----|
| ASV_16s_3900 | 1.169673821 | -0.026256143 | 3.54805764  | 3.144787027  | 0.87129292  | NA |
| ASV_16s_3901 | 1.148465808 | 0.492881003  | 3.547995424 | 3.154988702  | 0.870303824 | NA |
| ASV_16s_3902 | 1.24309201  | 0.225903033  | 3.30033736  | 3.328653781  | 0.853027087 | NA |
| ASV_16s_3903 | 1.238500944 | -0.363505792 | 3.547033453 | 2.834703168  | NA          | NA |
| ASV_16s_3904 | 1.180138674 | 0.607914677  | 3.547149584 | 3.174855112  | 0.868369228 | NA |
| ASV_16s_3905 | 1.388645172 | -0.647030767 | 3.547945399 | 2.458866076  | 0.930162509 | NA |
| ASV_16s_3906 | 1.416261437 | -0.79603935  | 3.547961917 | 2.522360782  | 0.925403884 | NA |
| ASV_16s_3907 | 1.368213617 | -0.924485681 | 3.058748497 | 2.700243998  | 0.911279502 | NA |
| ASV_16s_3908 | 1.297231315 | 2.76196453   | 3.547594288 | 0.81830925   | NA          | NA |
| ASV_16s_3909 | 1.642246949 | -0.41206213  | 3.549184846 | 4.429267192  | 0.729217106 | NA |
| ASV_16s_3910 | 0.65244495  | 0.322934368  | 3.550329776 | 1.097888173  | NA          | NA |
| ASV_16s_3911 | 1.844175536 | 0.790571422  | 3.549473858 | 4.186043222  | 0.758116901 | NA |
| ASV_16s_3912 | 0.473126978 | 0.120429541  | 3.550610944 | 2.118770519  | 0.952975041 | NA |
| ASV_16s_3913 | 1.238930166 | -0.254595596 | 3.547632015 | 3.015918808  | 0.883525715 | NA |
| ASV_16s_3914 | 1.149471464 | -0.341329685 | 3.547943285 | 2.031267972  | 0.958089486 | NA |
| ASV_16s_3915 | 1.223175495 | -0.394109296 | 2.755894751 | 3.670910588  | 0.816805271 | NA |
| ASV_16s_3916 | 1.386944847 | -0.795946179 | 3.547984827 | 2.514621341  | 0.925992045 | NA |
| ASV_16s_3917 | 1.375895325 | -0.229449079 | 2.810057508 | 3.533865498  | 0.831625579 | NA |
| ASV_16s_3918 | 1.298812292 | -1.555524221 | 2.268788513 | 1.542943424  | 0.980785609 | NA |
| ASV_16s_3919 | 1.241331177 | -1.908316083 | 3.547134847 | 0.688594449  | NA          | NA |
| ASV_16s_3920 | 0.809911942 | 16.32552626  | 3.551459046 | 1.241676641  | 0.989935432 | NA |
| ASV_16s_3921 | 1.317783202 | 1.763086688  | 2.487846709 | 4.146280425  | 0.762783083 | NA |
| ASV_16s_3922 | 1.621346923 | 1.288613897  | 3.547301639 | 2.07085187   | NA          | NA |
| ASV_16s_3923 | 0.758921314 | 1.836399768  | 3.549204968 | 0.985974912  | NA          | NA |
| ASV_16s_3924 | 1.015550107 | 1.490126026  | 3.547784916 | 1.732893314  | 0.973136719 | NA |
| ASV_16s_3925 | 1.575183845 | 0.37285826   | 3.550404695 | 1.05175159   | 0.993949959 | NA |
| ASV_16s_3926 | 1.478358117 | 0.650540217  | 3.548143341 | 3.699796534  | 0.813632515 | NA |
| ASV_16s_3927 | 1.159365677 | -0.407978128 | 3.549132446 | 2.647191362  | 0.915611777 | NA |
| ASV_16s_3928 | 1.446077294 | -0.796620227 | 3.547912966 | 2.248930113  | 0.944788473 | NA |
| ASV_16s_3929 | 1.208712374 | 0.178539136  | 3.547964717 | 3.587550424  | 0.825867123 | NA |
| ASV_16s_3930 | 1.182767488 | 0.006562731  | 3.545410004 | 2.051784674  | NA          | NA |
| ASV_16s_3931 | 1.453562913 | 0.20898611   | 3.264057732 | 3.768070819  | 0.806069998 | NA |
| ASV_16s_3932 | 1.422503017 | -0.795889097 | 3.547988175 | 2.552520564  | 0.923090563 | NA |
| ASV_16s_3933 | 1.431360607 | -0.795794256 | 3.548004655 | 2.570934931  | 0.921661554 | NA |
| ASV_16s_3934 | 1.112999114 | -0.913313876 | 3.548129493 | 1.609448367  | NA          | NA |
| ASV_16s_3935 | 1.364553536 | -0.795133756 | 3.548142784 | 2.563734155  | 0.922221846 | NA |
| ASV_16s_3936 | 1.153637416 | -2.761581728 | 3.156408314 | 0.992509085  | NA          | NA |
| ASV_16s_3937 | 1.90076068  | -0.496511772 | 3.548071878 | 3.765590817  | NA          | NA |
| ASV_16s_3938 | 1.633607551 | 0.552651125  | 3.508770447 | 3.647549461  | 0.819359111 | NA |
| ASV_16s_3939 | 1.492926561 | 0.694012303  | 3.550602015 | 1.896412549  | 0.965350436 | NA |
| ASV_16s_3940 | 0.552177976 | 1.556178461  | 3.549832103 | 0.811812993  | 0.997321521 | NA |
| ASV_16s_3941 | 1.121114247 | 0.118681875  | 3.548201882 | 3.187526371  | 0.867129502 | NA |
| ASV_16s_3942 | 1.15170064  | -0.031836683 | 3.548148198 | 3.151348019  | 0.870657144 | NA |
| ASV_16s_3943 | 1.098476296 | 0.785736196  | 3.548732109 | 2.737869782  | 0.908146864 | NA |
| ASV_16s_3944 | 1.243731826 | -0.420326121 | 3.546254647 | 2.406606974  | 0.933963959 | NA |
| ASV_16s_3945 | 1.455142659 | -0.796027513 | 3.547959569 | 2.560084093  | 0.922505126 | NA |
| ASV_16s_3946 | 1.339744278 | -0.794124413 | 3.548351054 | 2.556047378  | 0.922817842 | NA |
| ASV_16s_3947 | 1.758839732 | 0.589195842  | 3.549144825 | 3.098548684  | NA          | NA |
| ASV_16s_3948 | 1.211058965 | 0.230700208  | 3.547988631 | 2.718290503  | NA          | NA |
| ASV_16s_3949 | 1.252827668 | -0.114598593 | 3.54932108  | 2.331369988  | 0.93925114  | NA |
| ASV_16s_3950 | 1.497158097 | 0.749994266  | 3.54895754  | 1.862505558  | 0.967056795 | NA |
| ASV_16s_3951 | 1.227049568 | 1.386743854  | 2.980191065 | 2.588585617  | NA          | NA |
| ASV_16s_3952 | 1.27356486  | -11.54283246 | 3.552157344 | 0.4857462    | 0.999497017 | NA |
| ASV_16s_3953 | 1.575874881 | 1.142090542  | 3.550116654 | 1.615030898  | 0.978058086 | NA |
| ASV_16s_3954 | 1.652724429 | 17.28651869  | 3.550777093 | 0.360362687  | 0.999814347 | NA |
| ASV_16s_3955 | 0.475396519 | -9.413510422 | 3.552157344 | -0.171602621 | NA          | NA |
| ASV_16s_3956 | 1.134884978 | -0.372946175 | 3.548488422 | 2.421276606  | 0.932907449 | NA |
| ASV_16s_3957 | 1.158635937 | 0.578834408  | 3.547553107 | 3.094462128  | 0.876128316 | NA |
| ASV_16s_3958 | 1.242593744 | -0.251625678 | 3.547552794 | 3.160645687  | 0.869754081 | NA |
| ASV_16s_3959 | 1.188577583 | 0.65789144   | 3.547252441 | 3.221962897  | 0.863737808 | NA |
| ASV_16s_3960 | 1.45651752  | -0.803763989 | 3.548865629 | 2.0214959    | 0.958641036 | NA |
| ASV_16s_3961 | 1.360618571 | 0.792631906  | 3.549133222 | 3.026435517  | 0.882546002 | NA |
| ASV_16s_3962 | 1.753124141 | 0.41938739   | 3.549198498 | 1.308739455  | NA          | NA |
| ASV_16s_3963 | 0.771568517 | -0.020407256 | 3.550146616 | 1.484182584  | 0.982852211 | NA |
| ASV_16s_3964 | 1.369395514 | -0.463146765 | 3.549002312 | 1.808147823  | 0.96969208  | NA |
| ASV_16s_3965 | 1.438695238 | 1.502540267  | 3.548715685 | 2.655329962  | 0.914953687 | NA |
| ASV_16s_3966 | 1.590842035 | 0.363410864  | 3.549853015 | 1.561090862  | 0.980119017 | NA |

|              |             |              |             |              |             |    |
|--------------|-------------|--------------|-------------|--------------|-------------|----|
| ASV_16s_3967 | 1.588807678 | 1.187092488  | 3.549686662 | 1.515379254  | 0.981772449 | NA |
| ASV_16s_3968 | 1.32413968  | 2.562825625  | 3.546945635 | 0.582103541  | 0.999086883 | NA |
| ASV_16s_3969 | 1.154674624 | 0.049800486  | 3.547571935 | 2.092300856  | NA          | NA |
| ASV_16s_3970 | 1.281736451 | -0.086423681 | 2.434934791 | 6.139979532  | 0.523503202 | NA |
| ASV_16s_3971 | 1.300569302 | -0.795938158 | 3.547997683 | 2.424718505  | NA          | NA |
| ASV_16s_3972 | 1.41769537  | -0.795812123 | 3.548002461 | 2.557783272  | 0.92268344  | NA |
| ASV_16s_3973 | 1.24105188  | -1.06682619  | 3.547277479 | 2.866268748  | 0.897091659 | NA |
| ASV_16s_3974 | 1.31489832  | 1.347628606  | 3.202899173 | 1.926122944  | 0.963815805 | NA |
| ASV_16s_3975 | 1.393505447 | -0.594662832 | 3.133905955 | 1.957784209  | 0.962139884 | NA |
| ASV_16s_3976 | 1.253041772 | -0.963589838 | 3.548006424 | 2.128616061  | 0.952379881 | NA |
| ASV_16s_3977 | 1.465840514 | 0.678803669  | 3.550610538 | 2.071964637  | 0.955750041 | NA |
| ASV_16s_3978 | 1.519930487 | -0.067419415 | 3.548331455 | 2.239756657  | 0.94538788  | NA |
| ASV_16s_3979 | 1.579592656 | 0.908415752  | 3.548870203 | 1.324689384  | 0.98776714  | NA |
| ASV_16s_3980 | 1.424117143 | 1.162502264  | 3.549257445 | 1.604186824  | 0.978482012 | NA |
| ASV_16s_3981 | 1.457897764 | 0.694011244  | 3.550603211 | 1.884315479  | 0.965964729 | NA |
| ASV_16s_3982 | 1.175979938 | -0.224475727 | 3.547676809 | 2.823538278  | 0.900832393 | NA |
| ASV_16s_3983 | 1.116840531 | 0.893090788  | 3.547611175 | 3.119293388  | NA          | NA |
| ASV_16s_3984 | 1.300974414 | 0.151718972  | 3.54806429  | 3.538943628  | 0.831083569 | NA |
| ASV_16s_3985 | 1.168413837 | -0.493568511 | 3.547397099 | 1.640610506  | 0.977038899 | NA |
| ASV_16s_3986 | 1.150988286 | 0.403653307  | 3.549454834 | 1.242577524  | NA          | NA |
| ASV_16s_3987 | 1.210029089 | -0.554843481 | 3.083694427 | 2.429175865  | 0.932335108 | NA |
| ASV_16s_3988 | 1.40265686  | 1.003828505  | 3.547656451 | 2.506743135  | 0.926588445 | NA |
| ASV_16s_3989 | 1.681664332 | 0.658773839  | 3.549051993 | 2.626785502  | 0.917251341 | NA |
| ASV_16s_3990 | 1.627512785 | 16.95096182  | 3.551446052 | 0.542258191  | NA          | NA |
| ASV_16s_3992 | 1.082191892 | 0.130544186  | 3.548268818 | 3.127658538  | NA          | NA |
| ASV_16s_3993 | 1.135496603 | 0.088610827  | 3.548156065 | 3.204419967  | 0.86546972  | NA |
| ASV_16s_3994 | 1.195704364 | -0.288751533 | 3.547853322 | 2.96271606   | 0.888429736 | NA |
| ASV_16s_3995 | 1.188654702 | 0.60830656   | 3.547369309 | 3.160115959  | 0.869805598 | NA |
| ASV_16s_3996 | 1.018916547 | -0.411464496 | 3.548897961 | 1.941923758  | NA          | NA |
| ASV_16s_3997 | 1.386890464 | -0.796005932 | 3.547974644 | 2.50393878   | 0.926800179 | NA |
| ASV_16s_3998 | 1.372819072 | -0.792192561 | 3.548130528 | 2.117465998  | 0.953053601 | NA |
| ASV_16s_3999 | 1.228807698 | -0.117017261 | 3.549329599 | 2.247285954  | 0.944896153 | NA |
| ASV_16s_4000 | 1.526297724 | -0.663418275 | 3.061371522 | 1.218162768  | 0.990502674 | NA |
| ASV_16s_4001 | 1.409307163 | 0.199954267  | 3.539873979 | 3.224910753  | 0.863445956 | NA |
| ASV_16s_4002 | 1.782324442 | 0.821733387  | 3.48778925  | 3.162239261  | 0.869599055 | NA |
| ASV_16s_4003 | 1.452127758 | 0.7917861    | 3.548362593 | 2.610118819  | 0.918579314 | NA |
| ASV_16s_4004 | 1.111509702 | -0.239463028 | 3.549169906 | 2.802435574  | 0.902657308 | NA |
| ASV_16s_4005 | 0.344097357 | -0.938820329 | 3.549941287 | 0.621795398  | 0.998867151 | NA |
| ASV_16s_4006 | 1.372324764 | -0.657953485 | 3.547900329 | 2.605229765  | 0.918966953 | NA |
| ASV_16s_4007 | 1.149914245 | 1.184645583  | 3.547620522 | 2.980579262  | NA          | NA |
| ASV_16s_4008 | 1.275740936 | -0.418943743 | 3.547135114 | 3.105952785  | 0.87503073  | NA |
| ASV_16s_4009 | 1.314587645 | -0.794725245 | 3.548227288 | 2.538636226  | 0.924159727 | NA |
| ASV_16s_4010 | 1.171738455 | -0.101883133 | 3.549435564 | 2.39322105   | 0.934920759 | NA |
| ASV_16s_4011 | 0.676405794 | -0.473836225 | 3.549893983 | 1.279713102  | NA          | NA |
| ASV_16s_4012 | 0.847525018 | 0.813049426  | 3.550894514 | 0.933030846  | NA          | NA |
| ASV_16s_4013 | 1.413387655 | 0.602522076  | 3.231271883 | 1.647794605  | 0.976747797 | NA |
| ASV_16s_4014 | 0.927243029 | 1.264121604  | 3.550175549 | 1.095159146  | NA          | NA |
| ASV_16s_4015 | 1.008426259 | -2.046047324 | 3.550836384 | 1.668672029  | NA          | NA |
| ASV_16s_4016 | 0.679609587 | -13.15114679 | 3.552157344 | 0.047188821  | NA          | NA |
| ASV_16s_4017 | 1.124117732 | 0.137519632  | 3.548073695 | 3.313799378  | 0.854536209 | NA |
| ASV_16s_4018 | 1.234217301 | -0.363221013 | 3.547277594 | 2.753048047  | 0.906869223 | NA |
| ASV_16s_4019 | 1.221785486 | 0.218705909  | 3.546335226 | 2.752320729  | 0.906930627 | NA |
| ASV_16s_4020 | 1.373023408 | -0.79573205  | 3.54802273  | 2.529998041  | 0.924821293 | NA |
| ASV_16s_4021 | 1.244577526 | -0.199791214 | 3.549016601 | 2.237883091  | 0.945509887 | NA |
| ASV_16s_4022 | 0.538447342 | 1.337945032  | 3.549770415 | 0.908819873  | NA          | NA |
| ASV_16s_4023 | 0.734952605 | 0.219961452  | 3.550615821 | 1.436935635  | 0.984413006 | NA |
| ASV_16s_4024 | 0.742627108 | 0.219961211  | 3.550615413 | 1.442221058  | 0.984242835 | NA |
| ASV_16s_4025 | 1.260536832 | 6.338129009  | 3.544693895 | -0.466218864 | NA          | NA |
| ASV_16s_4026 | 0.767823551 | -2.65E-04    | 3.549682152 | 2.33094461   | NA          | NA |
| ASV_16s_4027 | 1.294332077 | -0.116837827 | 3.549770107 | 2.365603399  | 0.936872827 | NA |
| ASV_16s_4028 | 1.742493554 | 0.50065115   | 3.548339074 | 2.747681241  | 0.907321887 | NA |
| ASV_16s_4029 | 1.53722298  | 0.343841336  | 3.549491208 | 2.792963589  | 0.903471542 | NA |
| ASV_16s_4030 | 1.113591087 | -0.334817524 | 3.549153088 | 2.729323479  | 0.908862743 | NA |
| ASV_16s_4031 | 0.316396211 | -0.082467985 | 3.55059337  | 1.416834455  | NA          | NA |
| ASV_16s_4032 | 0.307293393 | -0.10307631  | 3.55059628  | 1.489587339  | NA          | NA |
| ASV_16s_4033 | 1.070395171 | 0.072132846  | 3.548492691 | 2.992660222  | NA          | NA |
| ASV_16s_4034 | 1.12095718  | 0.048236565  | 3.54806802  | 3.223496567  | 0.863585996 | NA |

|              |             |              |             |             |             |    |
|--------------|-------------|--------------|-------------|-------------|-------------|----|
| ASV_16s_4035 | 1.209999726 | 1.01654718   | 3.546275522 | 2.041615804 | 0.957501129 | NA |
| ASV_16s_4036 | 1.39324433  | -0.924326382 | 3.547640907 | 1.908513879 | 0.964729813 | NA |
| ASV_16s_4037 | 1.278520656 | -0.965507406 | 2.874673238 | 3.586007891 | 0.826033448 | NA |
| ASV_16s_4038 | 1.267995309 | -0.053142117 | 3.548757131 | 3.468060684 | 0.838596793 | NA |
| ASV_16s_4039 | 1.563257789 | 0.612815861  | 2.978048765 | 2.538090507 | 0.924201604 | NA |
| ASV_16s_4040 | 0.92883802  | 0.506966614  | 3.548288268 | 2.411117038 | 0.933640027 | NA |
| ASV_16s_4041 | 1.066371061 | 1.147472773  | 3.548317599 | 1.879950239 | 0.966184896 | NA |
| ASV_16s_4042 | 1.280354967 | 0.464299526  | 3.549590026 | 1.03095985  | NA          | NA |
| ASV_16s_4043 | 1.054406136 | -0.312077448 | 3.54917489  | 2.701406539 | NA          | NA |
| ASV_16s_4044 | 0.371895976 | -0.681570333 | 3.549931249 | 0.895270816 | NA          | NA |
| ASV_16s_4045 | 1.144473743 | -0.949914536 | 3.548864507 | 2.299013244 | 0.94145666  | NA |
| ASV_16s_4046 | 1.085310715 | -0.689474967 | 3.548457777 | 2.012142787 | NA          | NA |
| ASV_16s_4047 | 1.080048446 | 0.040445689  | 3.547987015 | 3.297884028 | NA          | NA |
| ASV_16s_4048 | 1.436961321 | -0.562910364 | 3.062836802 | 3.40530755  | 0.845151079 | NA |
| ASV_16s_4049 | 1.116477691 | 0.533299207  | 3.549101268 | 2.680170135 | NA          | NA |
| ASV_16s_4050 | 1.187096324 | 0.169715976  | 3.548037921 | 2.730965515 | NA          | NA |
| ASV_16s_4051 | 0.941279412 | -0.078905912 | 3.547887925 | 2.505745152 | 0.926663828 | NA |
| ASV_16s_4052 | 1.580963039 | 1.067465071  | 3.548677051 | 1.621007344 | 0.977822379 | NA |
| ASV_16s_4053 | 1.419964654 | 17.18681722  | 3.55144581  | 0.45301346  | 0.99960099  | NA |
| ASV_16s_4054 | 1.054258166 | -0.255064891 | 3.549185171 | 2.744006759 | NA          | NA |
| ASV_16s_4055 | 1.07089875  | -0.29897821  | 3.549172012 | 2.729284306 | 0.908866019 | NA |
| ASV_16s_4056 | 1.050406372 | -0.356093325 | 3.549169823 | 2.642542015 | NA          | NA |
| ASV_16s_4057 | 0.348598832 | 0.219994823  | 3.550659551 | 1.058051721 | NA          | NA |
| ASV_16s_4058 | 1.260701621 | -0.722493821 | 3.548151716 | 2.416335256 | 0.933264253 | NA |
| ASV_16s_4059 | 1.099060502 | 0.663804707  | 3.547155539 | 2.70241861  | NA          | NA |
| ASV_16s_4060 | 1.394185732 | -0.795843543 | 3.548007286 | 2.539591161 | 0.924086421 | NA |
| ASV_16s_4061 | 0.719610741 | -0.332009963 | 3.550313723 | 1.539091597 | 0.980925367 | NA |
| ASV_16s_4062 | 1.468656249 | 0.69722217   | 3.549224644 | 1.738794706 | 0.972875131 | NA |
| ASV_16s_4063 | 1.777363579 | 0.573062957  | 3.548219815 | 2.95502295  | 0.889131555 | NA |
| ASV_16s_4064 | 1.499453623 | 0.769496571  | 3.549997262 | 2.605985596 | 0.918907082 | NA |
| ASV_16s_4065 | 1.11477713  | -0.266554782 | 3.549165078 | 2.792882688 | 0.903478484 | NA |
| ASV_16s_4066 | 1.090581182 | -0.373859826 | 3.54915517  | 2.651384288 | 0.915273032 | NA |
| ASV_16s_4067 | 1.133029566 | 0.106121895  | 3.548097229 | 3.271869336 | 0.85876517  | NA |
| ASV_16s_4068 | 1.0887303   | 1.03340491   | 3.548067739 | 2.709816258 | 0.910487231 | NA |
| ASV_16s_4069 | 1.063481104 | -0.174962272 | 3.547974313 | 2.818206484 | NA          | NA |
| ASV_16s_4070 | 1.202791499 | -0.32561338  | 3.547091255 | 3.068941006 | 0.87855219  | NA |
| ASV_16s_4071 | 1.565180111 | 0.056965273  | 3.54965626  | 4.115368253 | 0.76639752  | NA |
| ASV_16s_4072 | 1.220845176 | -0.110149648 | 3.547000042 | 2.608597667 | 0.918700015 | NA |
| ASV_16s_4073 | 0.749988712 | 1.852226397  | 3.548996333 | 1.134190895 | NA          | NA |
| ASV_16s_4074 | 1.358229017 | 0.74367577   | 3.550279682 | 1.604701023 | 0.97846202  | NA |
| ASV_16s_4075 | 0.784492354 | 16.47655861  | 3.551454921 | 0.094723671 | NA          | NA |
| ASV_16s_4076 | 1.148913334 | 0.083632829  | 3.548007035 | 3.359364397 | 0.849889246 | NA |
| ASV_16s_4077 | 1.321773905 | -0.795303812 | 3.548109709 | 2.523995049 | 0.925279401 | NA |
| ASV_16s_4078 | 1.254902649 | -0.949130728 | 3.54750796  | 1.636744135 | 0.977194683 | NA |
| ASV_16s_4079 | 1.430180787 | -0.440371924 | 3.547906719 | 2.51473687  | 0.925983282 | NA |
| ASV_16s_4080 | 1.186173054 | -0.106324656 | 3.549358461 | 2.280209736 | 0.942719297 | NA |
| ASV_16s_4081 | 2.198720145 | -3.231783532 | 3.544734349 | 0.620726498 | NA          | NA |
| ASV_16s_4082 | 1.129861971 | -1.062024287 | 3.548539697 | 1.042042652 | 0.994121521 | NA |
| ASV_16s_4083 | 1.117663831 | 2.106924209  | 3.54754573  | 1.662335587 | NA          | NA |
| ASV_16s_4084 | 1.055487911 | -0.146190415 | 3.548032941 | 2.284113111 | NA          | NA |
| ASV_16s_4085 | 0.509045381 | 0.311686616  | 3.550599604 | 1.015278209 | NA          | NA |
| ASV_16s_4086 | 1.64844795  | 0.095912745  | 3.549334212 | 3.317010441 | 0.854210464 | NA |
| ASV_16s_4087 | 1.593616293 | 10.43541573  | 3.550500967 | 1.955841006 | 0.962243946 | NA |
| ASV_16s_4088 | 1.368436564 | 0.362647891  | 3.550182642 | 1.54601623  | 0.980673684 | NA |
| ASV_16s_4089 | 1.407858389 | 0.329406134  | 3.550616426 | 1.675929468 | 0.975587194 | NA |
| ASV_16s_4090 | 1.296152688 | 17.12755812  | 3.551446575 | 0.397046438 | 0.999743014 | NA |
| ASV_16s_4091 | 1.099954542 | -0.320344445 | 3.549159356 | 2.734257221 | 0.908449779 | NA |
| ASV_16s_4092 | 0.344481523 | 0.2199956    | 3.550660545 | 1.052025007 | NA          | NA |
| ASV_16s_4093 | 1.088107328 | -0.019577372 | 3.54899063  | 2.719638403 | 0.909670941 | NA |
| ASV_16s_4094 | 1.075956069 | 0.051266327  | 3.54854271  | 2.930823377 | 0.891327009 | NA |
| ASV_16s_4095 | 1.19864046  | -0.829829941 | 3.548662753 | 2.331386876 | 0.939249978 | NA |
| ASV_16s_4096 | 1.053176151 | 0.075720757  | 3.548342026 | 3.010715191 | NA          | NA |
| ASV_16s_4097 | 1.144849287 | -0.031501447 | 3.307961285 | 2.827977492 | 0.900446598 | NA |
| ASV_16s_4098 | 1.157771186 | 0.926665685  | 3.547421927 | 2.877799924 | 0.896071866 | NA |
| ASV_16s_4099 | 1.271539264 | -1.499576434 | 3.547174281 | 1.71205184  | 0.974048936 | NA |
| ASV_16s_4100 | 1.346492193 | -0.923988232 | 3.547251428 | 2.047545705 | 0.957161972 | NA |
| ASV_16s_4101 | 1.205401299 | 0.336416016  | 3.550607396 | 1.244075582 | NA          | NA |

|              |             |              |             |             |             |    |
|--------------|-------------|--------------|-------------|-------------|-------------|----|
| ASV_16s_4102 | 1.210182909 | -0.636098535 | 3.548262082 | 3.548836739 | 0.830026007 | NA |
| ASV_16s_4103 | 1.078848424 | 0.790392359  | 3.547380488 | 2.721714849 | 0.909497941 | NA |
| ASV_16s_4104 | 0.834326216 | 13.76059897  | 3.551457523 | 0.247319046 | NA          | NA |
| ASV_16s_4105 | 1.255081731 | -0.442323872 | 3.548756339 | 3.525453093 | 0.832522212 | NA |
| ASV_16s_4106 | 1.344189374 | 0.786242795  | 3.547088025 | 2.175086756 | 0.949517311 | NA |
| ASV_16s_4107 | 1.481241872 | 0.797357237  | 3.5494128   | 2.482468506 | 0.928411408 | NA |
| ASV_16s_4108 | 1.47711808  | 17.22860615  | 3.550923453 | 0.35610633  | 0.999821617 | NA |
| ASV_16s_4109 | 1.032616465 | -0.257089746 | 3.549192051 | 2.722550185 | NA          | NA |
| ASV_16s_4110 | 0.364603898 | -0.681459989 | 3.549955002 | 0.888897618 | NA          | NA |
| ASV_16s_4111 | 0.407463463 | 0.098333843  | 3.550614278 | 2.035756933 | NA          | NA |
| ASV_16s_4112 | 1.154887259 | -0.666071013 | 3.548827955 | 2.505557729 | 0.926677981 | NA |
| ASV_16s_4113 | 1.05576371  | 0.054331073  | 3.54838664  | 2.941359155 | NA          | NA |
| ASV_16s_4114 | 1.356435206 | -0.79614609  | 3.547959987 | 2.441624542 | 0.931428276 | NA |
| ASV_16s_4115 | 1.289959494 | -0.795609162 | 3.548032446 | 2.452227512 | 0.930651215 | NA |
| ASV_16s_4116 | 1.036633974 | -1.405336846 | 3.548030148 | 1.242808077 | 0.989907621 | NA |
| ASV_16s_4117 | 1.516338455 | 1.350251267  | 3.548513853 | 2.948165656 | 0.889755552 | NA |
| ASV_16s_4118 | 1.093568185 | 0.649941214  | 3.547924502 | 2.386479829 | 0.935399978 | NA |
| ASV_16s_4119 | 1.385231725 | -1.108795969 | 3.240992021 | 3.748261043 | 0.808273238 | NA |
| ASV_16s_4120 | 1.192183958 | 1.358600695  | 3.338968148 | 2.837283783 | 0.899635689 | NA |
| ASV_16s_4121 | 0.751007546 | 0.229251362  | 3.55068588  | 0.999203509 | 0.994841375 | NA |
| ASV_16s_4122 | 0.817832826 | 2.553569408  | 3.548748481 | 0.64822253  | NA          | NA |
| ASV_16s_4123 | 0.809102678 | -8.089658381 | 3.549869611 | 0.408457923 | NA          | NA |
| ASV_16s_4124 | 1.715859848 | 0.743012208  | 3.549685533 | 4.076513926 | 0.77092354  | NA |
| ASV_16s_4125 | 1.536100266 | 0.57974121   | 3.549374107 | 2.798879292 | 0.90296337  | NA |
| ASV_16s_4126 | 1.391610573 | 0.492974166  | 3.54933249  | 2.91814165  | 0.892470088 | NA |
| ASV_16s_4127 | 1.059951846 | -0.29898914  | 3.549175482 | 2.719115547 | 0.909714479 | NA |
| ASV_16s_4128 | 0.658454425 | -12.91371344 | 3.552157344 | 0.027799809 | NA          | NA |
| ASV_16s_4129 | 1.096930897 | 0.08070397   | 3.548535287 | 3.008096465 | 0.884252233 | NA |
| ASV_16s_4130 | 1.32110921  | -0.795638285 | 3.54804598  | 2.495305316 | 0.927450164 | NA |
| ASV_16s_4131 | 1.256375435 | 1.979978659  | 3.546914162 | 1.938955253 | 0.963141589 | NA |
| ASV_16s_4132 | 1.155077562 | -1.415758184 | 3.548075102 | 1.785304296 | 0.970762694 | NA |
| ASV_16s_4133 | 0.873940438 | -0.850848781 | 3.549449341 | 0.967546508 | 0.995335205 | NA |
| ASV_16s_4134 | 0.524647027 | 0.296106689  | 3.551039393 | 0.829913994 | NA          | NA |
| ASV_16s_4135 | 1.024619172 | -0.215076317 | 3.549201884 | 2.727359282 | NA          | NA |
| ASV_16s_4136 | 1.051035365 | -0.27365546  | 3.549183584 | 2.730390102 | 0.908773536 | NA |
| ASV_16s_4137 | 0.224372131 | -0.170078047 | 3.550624895 | 0.861669205 | NA          | NA |
| ASV_16s_4138 | 1.121195248 | 0.120917621  | 3.548290547 | 3.188916434 | 0.866993229 | NA |
| ASV_16s_4139 | 1.040356226 | 0.203766817  | 3.548225464 | 3.147282211 | 0.871051275 | NA |
| ASV_16s_4140 | 1.206292186 | 0.138858985  | 3.546296733 | 2.66125762  | 0.914472883 | NA |
| ASV_16s_4141 | 1.335877271 | -0.795577591 | 3.548056008 | 2.514765248 | 0.925981129 | NA |
| ASV_16s_4142 | 1.182033589 | -1.098186971 | 3.548488676 | 1.965097458 | NA          | NA |
| ASV_16s_4143 | 1.325581951 | 0.407172275  | 3.548663575 | 3.002061331 | 0.884811476 | NA |
| ASV_16s_4144 | 1.506316866 | -1.452557867 | 3.545536012 | 2.393557769 | 0.934896776 | NA |
| ASV_16s_4145 | 1.328071704 | 0.659421475  | 3.550500557 | 2.516777523 | 0.925828411 | NA |
| ASV_16s_4146 | 1.370113525 | 0.753863217  | 3.54638707  | 2.638677004 | 0.916297708 | NA |
| ASV_16s_4147 | 1.533966176 | 1.187630006  | 3.549561003 | 1.46170596  | 0.983605865 | NA |
| ASV_16s_4148 | 1.02283336  | -0.356087509 | 3.549179136 | 2.616287378 | NA          | NA |
| ASV_16s_4150 | 1.197779239 | -0.852984034 | 3.548298219 | 2.249359204 | 0.944760353 | NA |
| ASV_16s_4151 | 1.198871372 | -0.379480757 | 3.547538305 | 2.581964553 | NA          | NA |
| ASV_16s_4152 | 1.02794682  | 1.814509297  | 3.547062772 | 2.575344718 | NA          | NA |
| ASV_16s_4153 | 1.35451144  | -0.81838274  | 3.270047415 | 2.295598286 | 0.941687015 | NA |
| ASV_16s_4154 | 1.346806848 | -0.795561836 | 3.548057155 | 2.525024786 | 0.925200914 | NA |
| ASV_16s_4155 | 1.149942868 | -1.334989677 | 3.548006674 | 2.047381562 | 0.957171379 | NA |
| ASV_16s_4156 | 1.217178852 | -0.598148192 | 3.547561115 | 2.847548015 | 0.898737969 | NA |
| ASV_16s_4157 | 0.911215894 | -0.638204788 | 3.346207615 | 1.921573887 | 0.964053166 | NA |
| ASV_16s_4158 | 0.909376289 | 0.194776301  | 3.547306115 | 2.691226132 | NA          | NA |
| ASV_16s_4159 | 1.186957383 | -0.841351494 | 3.546954694 | 1.842411055 | NA          | NA |
| ASV_16s_4160 | 1.407965911 | 1.519679392  | 3.548783843 | 2.034223686 | 0.957921882 | NA |
| ASV_16s_4161 | 1.309105678 | -0.109512005 | 3.548633901 | 1.933823906 | 0.963412017 | NA |
| ASV_16s_4162 | 1.425868543 | 1.175349142  | 3.549976071 | 1.525987245 | 0.98139632  | NA |
| ASV_16s_4163 | 1.429768052 | 0.694004641  | 3.550604214 | 1.874363461 | 0.966465512 | NA |
| ASV_16s_4164 | 1.049960939 | -0.031162805 | 3.548194227 | 2.93139648  | 0.891275231 | NA |
| ASV_16s_4165 | 1.053652352 | 0.065225595  | 3.54802812  | 3.301304149 | NA          | NA |
| ASV_16s_4166 | 0.961097892 | 1.992512449  | 3.546857754 | 2.32786386  | NA          | NA |
| ASV_16s_4167 | 1.196973262 | -0.547918204 | 3.548971952 | 1.812999147 | 0.969461905 | NA |
| ASV_16s_4168 | 1.315484152 | -0.356180966 | 3.547822293 | 3.20676791  | 0.865238411 | NA |
| ASV_16s_4169 | 1.419226601 | 0.179189179  | 3.54956627  | 2.221952136 | 0.946541606 | NA |

|              |             |              |             |             |             |    |
|--------------|-------------|--------------|-------------|-------------|-------------|----|
| ASV_16s_4170 | 1.145128839 | 2.087315463  | 3.547499412 | 2.453883317 | 0.930529478 | NA |
| ASV_16s_4171 | 1.51425041  | -0.376588996 | 3.546578758 | 2.808353176 | 0.902147078 | NA |
| ASV_16s_4172 | 0.717173898 | 0.22658817   | 3.550662805 | 1.108064545 | 0.992892019 | NA |
| ASV_16s_4173 | 1.536423164 | 0.821522098  | 3.549357044 | 2.633646814 | 0.916701724 | NA |
| ASV_16s_4174 | 1.416749849 | 0.219040413  | 3.549488747 | 3.009389115 | NA          | NA |
| ASV_16s_4175 | 1.593057561 | 0.794364819  | 3.548291154 | 2.066947813 | NA          | NA |
| ASV_16s_4176 | 1.08752374  | 0.130033706  | 3.548922282 | 2.874365986 | 0.896376012 | NA |
| ASV_16s_4177 | 1.222237841 | -0.40892322  | 3.547215704 | 2.830075977 | 0.900263998 | NA |
| ASV_16s_4178 | 1.122398612 | 1.644900262  | 3.547024662 | 2.68852403  | 0.912245142 | NA |
| ASV_16s_4179 | 1.268652946 | -0.974564372 | 3.547638105 | 2.026454179 | 0.958361678 | NA |
| ASV_16s_4180 | 1.338091183 | -0.795576986 | 3.548055264 | 2.51635937  | 0.925860158 | NA |
| ASV_16s_4181 | 1.195205816 | -0.740486698 | 2.572325293 | 4.085373362 | 0.769893247 | NA |
| ASV_16s_4182 | 1.202689037 | 1.833251612  | 3.324254785 | 2.565482729 | 0.922085965 | NA |
| ASV_16s_4183 | 1.343954169 | -1.205407971 | 3.120609872 | 2.745711778 | 0.907487752 | NA |
| ASV_16s_4184 | 1.334680837 | -0.999942003 | 3.087329145 | 3.977462943 | 0.782369556 | NA |
| ASV_16s_4185 | 1.167256999 | -0.758220272 | 3.54669339  | 2.620137713 | 0.917782232 | NA |
| ASV_16s_4186 | 1.128648893 | -0.09487831  | 3.550043291 | 1.290426548 | NA          | NA |
| ASV_16s_4187 | 1.622575339 | 0.720138599  | 3.549256891 | 2.347761265 | NA          | NA |
| ASV_16s_4188 | 1.160055343 | 0.395933732  | 3.551399431 | 0.552674305 | NA          | NA |
| ASV_16s_4189 | 1.530701668 | 0.350809249  | 3.550370973 | 1.323623441 | 0.987796643 | NA |
| ASV_16s_4190 | 1.011097456 | -0.22762261  | 3.549204241 | 2.712270566 | NA          | NA |
| ASV_16s_4191 | 1.108142975 | -0.34791477  | 3.549152878 | 2.707043533 | 0.910717053 | NA |
| ASV_16s_4192 | 1.022994493 | 0.188530745  | 3.548961124 | 2.670466833 | 0.913723419 | NA |
| ASV_16s_4193 | 1.051597213 | 0.068899911  | 3.548553343 | 2.898376281 | 0.894241358 | NA |
| ASV_16s_4194 | 1.108907597 | -0.400271157 | 3.548557401 | 2.418178617 | 0.933131258 | NA |
| ASV_16s_4195 | 1.018820992 | -0.341178096 | 3.548024851 | 1.927020788 | NA          | NA |
| ASV_16s_4196 | 1.13473258  | 0.205939365  | 3.547992139 | 3.533442071 | 0.831670747 | NA |
| ASV_16s_4197 | 1.197288224 | 0.712859859  | 3.546043267 | 2.365223808 | 0.93689945  | NA |
| ASV_16s_4198 | 1.09981794  | 0.73685216   | 3.547642355 | 2.809923528 | 0.902011481 | NA |
| ASV_16s_4199 | 1.277087935 | -0.843054662 | 3.235024386 | 2.928808771 | 0.891508941 | NA |
| ASV_16s_4200 | 1.297883123 | -1.176944199 | 2.865277514 | 3.462278404 | 0.839204616 | NA |
| ASV_16s_4201 | 1.260703782 | -0.795206706 | 3.548135845 | 2.480969642 | 0.928523239 | NA |
| ASV_16s_4202 | 1.272935682 | -0.546020857 | 3.546868635 | 3.040979601 | 0.881185568 | NA |
| ASV_16s_4203 | 1.13180103  | 2.378650117  | 2.933694423 | 1.504795514 | 0.982143175 | NA |
| ASV_16s_4204 | 1.362161518 | 0.514624969  | 3.548262799 | 3.150202826 | 0.870768204 | NA |
| ASV_16s_4205 | 1.194692707 | 2.014496139  | 3.54625608  | 2.155705829 | NA          | NA |
| ASV_16s_4206 | 1.026906828 | -0.389861975 | 3.547511298 | 2.595459806 | 0.919738977 | NA |
| ASV_16s_4207 | 1.194726647 | -0.080490083 | 3.376741798 | 2.002148005 | 0.959721386 | NA |
| ASV_16s_4208 | 1.112454551 | -0.14092494  | 3.549516087 | 2.239068292 | 0.945432723 | NA |
| ASV_16s_4209 | 1.083678669 | -0.104178323 | 3.549444529 | 2.29940492  | NA          | NA |
| ASV_16s_4210 | 1.450301697 | 0.441583852  | 3.550003415 | 0.767417834 | NA          | NA |
| ASV_16s_4211 | 1.470380541 | 1.036831117  | 3.547210366 | 2.827527579 | NA          | NA |
| ASV_16s_4212 | 0.696247772 | 0.219963171  | 3.550618017 | 1.409390037 | 0.985281919 | NA |
| ASV_16s_4213 | 1.339709654 | 1.050011668  | 3.549330058 | 1.552679579 | 0.980429651 | NA |
| ASV_16s_4214 | 1.261093527 | 0.780914579  | 3.4739022   | 3.921839587 | 0.788734711 | NA |
| ASV_16s_4215 | 1.387829924 | 1.034393825  | 3.550172837 | 2.094316411 | 0.954436092 | NA |
| ASV_16s_4216 | 0.352936573 | -0.681286821 | 3.549995034 | 0.878435039 | NA          | NA |
| ASV_16s_4218 | 1.101202632 | -0.161276792 | 3.548327813 | 2.539596582 | 0.924086005 | NA |
| ASV_16s_4219 | 1.048664307 | 1.4789774    | 3.547252736 | 2.704172535 | NA          | NA |
| ASV_16s_4220 | 1.139143097 | -0.468486387 | 3.54795847  | 2.387546812 | 0.935324246 | NA |
| ASV_16s_4221 | 0.967695768 | 1.86814151   | 3.546678423 | 2.263820857 | 0.943808312 | NA |
| ASV_16s_4222 | 1.258933401 | -0.794428382 | 3.548293092 | 2.504063694 | 0.926790754 | NA |
| ASV_16s_4223 | 1.368869941 | 0.161859627  | 3.549238062 | 2.603832573 | 0.919077572 | NA |
| ASV_16s_4224 | 0.710024746 | 0.219962598  | 3.550617209 | 1.419356327 | 0.984971009 | NA |
| ASV_16s_4225 | 0.782599523 | -0.588335371 | 3.550054309 | 1.879864833 | 0.966189195 | NA |
| ASV_16s_4226 | 1.046723211 | -0.069707264 | 3.549381867 | 2.823229986 | 0.900859161 | NA |
| ASV_16s_4227 | 0.925177045 | -0.175229949 | 3.548222899 | 1.699270628 | NA          | NA |
| ASV_16s_4228 | 1.096363115 | -10.99804013 | 3.552157344 | 0.401865089 | NA          | NA |
| ASV_16s_4229 | 1.090529943 | 17.06569339  | 3.551447556 | 0.286584158 | NA          | NA |
| ASV_16s_4230 | 1.043630092 | -0.277289396 | 3.549185223 | 2.72093102  | 0.909563264 | NA |
| ASV_16s_4231 | 0.351478157 | -0.681262952 | 3.550000221 | 0.87710298  | NA          | NA |
| ASV_16s_4232 | 1.09120948  | 0.068277946  | 3.548271963 | 3.189579152 | 0.866928241 | NA |
| ASV_16s_4233 | 1.348131071 | -0.833945767 | 3.547740969 | 2.10625917  | 0.953725618 | NA |
| ASV_16s_4234 | 1.273468682 | -0.795397475 | 3.548102342 | 2.47971722  | 0.928616618 | NA |
| ASV_16s_4235 | 1.214186863 | -0.914046231 | 2.882928837 | 3.06729861  | 0.878707516 | NA |
| ASV_16s_4236 | 1.297286887 | -1.168847698 | 3.10083646  | 2.053943857 | 0.956794403 | NA |
| ASV_16s_4237 | 1.282182406 | 0.254400566  | 3.490351651 | 3.278319096 | 0.858117664 | NA |

|              |             |              |             |              |             |    |
|--------------|-------------|--------------|-------------|--------------|-------------|----|
| ASV_16s_4238 | 1.074019773 | -0.649789168 | 3.548420825 | 1.859452517  | 0.967208081 | NA |
| ASV_16s_4239 | 1.407944974 | -0.113485698 | 3.548841492 | 2.38974247   | 0.935168264 | NA |
| ASV_16s_4240 | 1.148177453 | 2.970377387  | 2.885095029 | 0.918369095  | 0.996040116 | NA |
| ASV_16s_4241 | 1.47005264  | 0.91538449   | 3.549068404 | 2.375543933  | 0.936173632 | NA |
| ASV_16s_4242 | 0.785162218 | 1.611326557  | 3.548715677 | 1.593799694  | 0.978883539 | NA |
| ASV_16s_4243 | 0.856321594 | -0.162694514 | 3.54953657  | 2.052885909  | NA          | NA |
| ASV_16s_4244 | 0.961087679 | 0.310360451  | 3.549176261 | 0.668601977  | 0.998565525 | NA |
| ASV_16s_4245 | 0.691432407 | 0.219963252  | 3.550618307 | 1.40585606   | 0.985391224 | NA |
| ASV_16s_4246 | 1.227320988 | 3.319210213  | 3.546571554 | 1.162887265  | NA          | NA |
| ASV_16s_4247 | 1.471146611 | 0.323440396  | 3.194670728 | 4.110602018  | 0.766953762 | NA |
| ASV_16s_4248 | 1.324413432 | 0.31593918   | 3.550641515 | 1.900953813  | 0.965118252 | NA |
| ASV_16s_4250 | 0.380884963 | -0.128532544 | 3.549478951 | 0.887267494  | NA          | NA |
| ASV_16s_4251 | 1.075830069 | 0.010679882  | 3.548341504 | 2.796952448  | 0.903129021 | NA |
| ASV_16s_4252 | 1.05355533  | 0.253521637  | 3.548047479 | 3.35244809   | NA          | NA |
| ASV_16s_4253 | 0.921683093 | 0.830633073  | 3.547165591 | 2.712010088  | NA          | NA |
| ASV_16s_4254 | 1.239467966 | -0.802275012 | 3.548086726 | 2.223110915  | 0.946466906 | NA |
| ASV_16s_4255 | 1.314893677 | -0.827897145 | 3.548152299 | 2.537798548  | 0.924224003 | NA |
| ASV_16s_4256 | 1.324530696 | 0.867351048  | 3.548295466 | 1.877519168  | 0.966307165 | NA |
| ASV_16s_4257 | 1.089766442 | -0.494601063 | 3.323689475 | 2.235070594  | 0.945692771 | NA |
| ASV_16s_4258 | 1.355879904 | 0.377261263  | 2.492806412 | 4.463714175  | 0.725082181 | NA |
| ASV_16s_4259 | 1.393864585 | 0.363155791  | 3.55048095  | 1.092648113  | 0.99319242  | NA |
| ASV_16s_4260 | 1.241094495 | 1.374812424  | 3.549316722 | 2.328170134  | 0.939471092 | NA |
| ASV_16s_4261 | 1.290145763 | 0.389448796  | 3.550639361 | 3.246236854  | 0.86132754  | NA |
| ASV_16s_4262 | 0.026786389 | 0.497149673  | 3.551985684 | 0.092979958  | 0.999998204 | NA |
| ASV_16s_4263 | 1.044875665 | -0.271897725 | 3.549186007 | 2.725671071  | 0.909167912 | NA |
| ASV_16s_4264 | 0.632010472 | -13.75785614 | 3.552157344 | 0.002677312  | NA          | NA |
| ASV_16s_4265 | 1.02331543  | 0.041330789  | 3.548732386 | 2.781130072  | 0.904484505 | NA |
| ASV_16s_4266 | 1.119083163 | -0.248790312 | 3.54814031  | 2.753898058  | 0.906797437 | NA |
| ASV_16s_4267 | 1.196857566 | 0.850007872  | 3.106499631 | 3.248329236  | 0.861119032 | NA |
| ASV_16s_4268 | 1.212352727 | -0.51604809  | 3.548154578 | 2.375809698  | 0.936154886 | NA |
| ASV_16s_4269 | 1.243223505 | -0.795021837 | 3.548174169 | 2.476912447  | 0.928825523 | NA |
| ASV_16s_4270 | 1.478210991 | -0.054476985 | 3.547001098 | 3.447445054  | 0.840760296 | NA |
| ASV_16s_4271 | 1.31215241  | -0.718732667 | 2.436749501 | 3.778347382  | 0.804924217 | NA |
| ASV_16s_4272 | 1.209629406 | 0.128568259  | 3.546558362 | 2.069232017  | NA          | NA |
| ASV_16s_4273 | 1.087362413 | 0.407184394  | 3.54963091  | 1.056014169  | NA          | NA |
| ASV_16s_4274 | 1.061732991 | 0.40363717   | 3.549500642 | 1.216514635  | NA          | NA |
| ASV_16s_4275 | 1.03236888  | 0.407685317  | 3.547609638 | 2.301099387  | NA          | NA |
| ASV_16s_4276 | 1.890925415 | 0.403728511  | 3.549241325 | 1.402720346  | NA          | NA |
| ASV_16s_4277 | 0.766930872 | 0.663739571  | 3.549896478 | 2.061845974  | 0.956338099 | NA |
| ASV_16s_4278 | 0.918836908 | 1.951115618  | 3.547982688 | 2.164219259  | 0.950194624 | NA |
| ASV_16s_4279 | 1.087723984 | 1.308937227  | 2.453320543 | 4.019511522  | 0.777527337 | NA |
| ASV_16s_4280 | 1.229375242 | 0.341481574  | 3.549407815 | 2.811411032  | NA          | NA |
| ASV_16s_4281 | 1.114899379 | 0.082847064  | 3.549342672 | 3.424907363  | 0.84311404  | NA |
| ASV_16s_4282 | 0.98089846  | -0.289148571 | 3.549204768 | 2.650997755  | NA          | NA |
| ASV_16s_4283 | 0.347102911 | -0.681192376 | 3.550016046 | 0.873073775  | NA          | NA |
| ASV_16s_4284 | 0.377816913 | 0.050995118  | 3.550608441 | 2.045546531  | 0.957276476 | NA |
| ASV_16s_4285 | 0.283719279 | -0.143387997 | 3.550601767 | 1.209271135  | NA          | NA |
| ASV_16s_4286 | 1.091019623 | -1.692446824 | 3.546221995 | 2.159107486  | 0.950511553 | NA |
| ASV_16s_4287 | 1.121030422 | -0.982863878 | 2.88932458  | 3.789317672  | 0.803698987 | NA |
| ASV_16s_4288 | 1.269991935 | 0.00352299   | 3.548689536 | 2.06902899   | 0.955921084 | NA |
| ASV_16s_4289 | 1.41817278  | 1.188157446  | 3.549439369 | 1.385236225  | 0.986019178 | NA |
| ASV_16s_4290 | 1.399835899 | 0.694004539  | 3.550605326 | 1.863574295  | 0.967003745 | NA |
| ASV_16s_4291 | 1.042667511 | -0.257217432 | 3.549188685 | 2.731932794  | 0.908644443 | NA |
| ASV_16s_4292 | 1.071608155 | 0.674918705  | 3.548243578 | 2.984083013  | NA          | NA |
| ASV_16s_4293 | 1.065664178 | 0.132102603  | 3.548340695 | 3.05890775   | 0.879499807 | NA |
| ASV_16s_4294 | 1.097685649 | 0.54564671   | 3.338144021 | 2.392802348  | 0.934950575 | NA |
| ASV_16s_4295 | 1.16234484  | 0.147118206  | 3.546728728 | 2.521401751  | 0.925476888 | NA |
| ASV_16s_4296 | 1.216612404 | -0.043311324 | 3.292138501 | 3.577251163  | 0.826976685 | NA |
| ASV_16s_4297 | 1.27405409  | -2.605260246 | 3.54660321  | 1.252744515  | 0.989661334 | NA |
| ASV_16s_4298 | 1.178436536 | -1.015181184 | 3.547459999 | 2.022213316  | 0.958600679 | NA |
| ASV_16s_4299 | 1.115602142 | 2.303450246  | 3.548596958 | 0.818602208  | 0.997249445 | NA |
| ASV_16s_4300 | 0.749943417 | 17.75661052  | 3.551446426 | 0.026308493  | NA          | NA |
| ASV_16s_4301 | 1.404632067 | -0.066663665 | 3.549266347 | 2.868228279  | 0.896918669 | NA |
| ASV_16s_4302 | 0.185080662 | -0.169977362 | 3.550650079 | 0.766749082  | NA          | NA |
| ASV_16s_4303 | 0.624077287 | -14.42999292 | 3.552157344 | -0.005075746 | NA          | NA |
| ASV_16s_4305 | 1.024321678 | 0.076852462  | 3.548490787 | 2.931651202  | NA          | NA |
| ASV_16s_4306 | 1.02235125  | -0.308764402 | 3.548746863 | 2.356606077  | 0.937502352 | NA |

|              |             |              |             |              |             |    |
|--------------|-------------|--------------|-------------|--------------|-------------|----|
| ASV_16s_4307 | 1.295570982 | -0.795988489 | 3.547988252 | 2.399752903  | 0.934454741 | NA |
| ASV_16s_4308 | 0.572851002 | 0.895389036  | 3.550259115 | 1.102053365  | NA          | NA |
| ASV_16s_4309 | 1.012674113 | -0.118415344 | 3.549141139 | 1.620914831  | 0.977826039 | NA |
| ASV_16s_4310 | 1.239697384 | 0.298892814  | 3.551819311 | 0.386401568  | 0.99976537  | NA |
| ASV_16s_4311 | 1.375255766 | 16.51189118  | 3.551449855 | 1.752710523  | 0.972252546 | NA |
| ASV_16s_4312 | 0.982466623 | -0.235604657 | 3.54921326  | 2.681876683  | NA          | NA |
| ASV_16s_4313 | 1.03209592  | -0.294465895 | 3.549185529 | 2.696724432  | 0.911569997 | NA |
| ASV_16s_4314 | 0.271316523 | -0.170162597 | 3.550604355 | 0.956898016  | NA          | NA |
| ASV_16s_4315 | 1.230619279 | -0.796322641 | 3.548156091 | 1.853256733  | 0.967513901 | NA |
| ASV_16s_4316 | 1.030960173 | 0.162905647  | 3.548106461 | 3.282613664  | NA          | NA |
| ASV_16s_4317 | 1.086420888 | 0.041351292  | 3.547988275 | 3.296929327  | 0.856243203 | NA |
| ASV_16s_4318 | 0.98705341  | -0.340759982 | 3.548029584 | 1.996507756  | NA          | NA |
| ASV_16s_4319 | 1.142489262 | 2.285717063  | 3.54805592  | 0.709816067  | NA          | NA |
| ASV_16s_4320 | 1.251970953 | -0.819452637 | 3.547943331 | 2.102129291  | 0.953971967 | NA |
| ASV_16s_4321 | 1.094832041 | 1.920596436  | 3.546397764 | 2.231561988  | NA          | NA |
| ASV_16s_4322 | 1.26602452  | -0.239398656 | 3.547617178 | 3.185933637  | 0.867285578 | NA |
| ASV_16s_4323 | 0.807779829 | -0.453792475 | 3.547360915 | 1.008703004  | 0.994686921 | NA |
| ASV_16s_4324 | 0.791445732 | -0.014327947 | 3.549136269 | 3.030247588  | NA          | NA |
| ASV_16s_4325 | 1.026515044 | 0.509793795  | 3.549101044 | 2.910300134  | 0.89317431  | NA |
| ASV_16s_4326 | 1.226712055 | -0.207427617 | 3.545634632 | 1.209118162  | 0.990715437 | NA |
| ASV_16s_4327 | 1.010165677 | -0.470218128 | 3.548211274 | 2.410374445  | 0.933693417 | NA |
| ASV_16s_4328 | 1.357676701 | 0.830194864  | 3.549825826 | 1.971473868  | 0.961402321 | NA |
| ASV_16s_4329 | 1.546558211 | 0.58891597   | 3.54835807  | 2.651153607  | 0.915291685 | NA |
| ASV_16s_4330 | 1.425843797 | 0.69400742   | 3.550604358 | 1.872945244  | 0.966536539 | NA |
| ASV_16s_4331 | 0.973749278 | -0.194136699 | 3.549224958 | 2.676996311  | NA          | NA |
| ASV_16s_4332 | 0.964132467 | -0.103551322 | 3.54911006  | 2.642721603  | NA          | NA |
| ASV_16s_4333 | 0.992624689 | -0.17626482  | 3.54834253  | 2.401041438  | NA          | NA |
| ASV_16s_4334 | 1.114321801 | 0.213666704  | 3.309639326 | 2.989382146  | 0.885982729 | NA |
| ASV_16s_4335 | 1.081923819 | -0.494195562 | 3.12277276  | 2.71288788   | 0.91023232  | NA |
| ASV_16s_4336 | 1.19801357  | -0.634181496 | 3.546270398 | 1.797845777  | 0.970177608 | NA |
| ASV_16s_4337 | 1.077391892 | -0.521434914 | 3.547154781 | 2.289366715  | NA          | NA |
| ASV_16s_4338 | 1.044359575 | -0.519895797 | 3.549747301 | 0.791443799  | 0.997530295 | NA |
| ASV_16s_4339 | 1.270920656 | 0.334050259  | 3.550616048 | 1.681496672  | 0.975353649 | NA |
| ASV_16s_4340 | 0.3914758   | 0.252213591  | 3.550612957 | 2.636213927  | 0.916495652 | NA |
| ASV_16s_4341 | 0.319777668 | 0.220000521  | 3.550667044 | 1.014290635  | NA          | NA |
| ASV_16s_4342 | 1.02654862  | -0.025760716 | 3.54918159  | 2.746130444  | 0.907452504 | NA |
| ASV_16s_4343 | 1.022085835 | 0.108146853  | 3.548228735 | 3.076757967  | 0.87781182  | NA |
| ASV_16s_4344 | 1.046300751 | 0.106403151  | 3.54809461  | 3.262742913  | NA          | NA |
| ASV_16s_4345 | 1.133998412 | 1.743620656  | 3.547812979 | 0.873546015  | 0.99661896  | NA |
| ASV_16s_4346 | 1.054672462 | 1.59566527   | 3.547133039 | 2.504989633  | NA          | NA |
| ASV_16s_4347 | 1.337428341 | -0.701552421 | 3.547291547 | 2.075203117  | NA          | NA |
| ASV_16s_4348 | 1.028835552 | -1.24692358  | 3.546526997 | 1.658066169  | NA          | NA |
| ASV_16s_4349 | 0.799279014 | -0.925232054 | 3.548442025 | 1.474322962  | NA          | NA |
| ASV_16s_4350 | 1.172648214 | -1.294627009 | 3.547981999 | 1.554293465  | 0.980370273 | NA |
| ASV_16s_4351 | 1.336961402 | -0.105908565 | 3.550523327 | 2.00925211   | 0.95932651  | NA |
| ASV_16s_4352 | 1.056630852 | 2.600206638  | 3.547699919 | 1.364475407  | NA          | NA |
| ASV_16s_4353 | 1.120519011 | -0.836234756 | 3.547038626 | 1.818095033  | 0.969219067 | NA |
| ASV_16s_4354 | 0.699896894 | -6.800596755 | 3.552157344 | 0.06515736   | NA          | NA |
| ASV_16s_4355 | 1.349514316 | 0.932111529  | 3.549494794 | 1.505824064  | 0.982107346 | NA |
| ASV_16s_4356 | 1.417182617 | 1.186914754  | 3.549727997 | 1.468617544  | 0.983376275 | NA |
| ASV_16s_4357 | 0.947145285 | -0.211287141 | 3.549231664 | 2.650108057  | NA          | NA |
| ASV_16s_4358 | 1.016879042 | -0.326571789 | 3.549185167 | 2.649609701  | 0.915416477 | NA |
| ASV_16s_4359 | 0.613499705 | -6.732755076 | 3.552157344 | -0.015539768 | NA          | NA |
| ASV_16s_4360 | 1.022883471 | -0.404585444 | 3.54889102  | 2.380605017  | 0.935816167 | NA |
| ASV_16s_4361 | 1.007535581 | 0.526494605  | 3.548594467 | 2.843977995  | 0.899050603 | NA |
| ASV_16s_4362 | 1.061183521 | 0.001784198  | 3.548118973 | 3.094324115  | 0.876141476 | NA |
| ASV_16s_4363 | 0.959296351 | -0.342074368 | 3.548222037 | 1.64901449   | NA          | NA |
| ASV_16s_4364 | 1.071691118 | -0.393509662 | 3.548185673 | 2.346495701  | NA          | NA |
| ASV_16s_4365 | 0.965796805 | -0.341320284 | 3.548087337 | 1.824125764  | NA          | NA |
| ASV_16s_4366 | 1.209851318 | -0.698544679 | 3.040548277 | 3.171658767  | 0.86868124  | NA |
| ASV_16s_4367 | 1.267832022 | -0.795771829 | 3.548032919 | 2.425869216  | 0.932574983 | NA |
| ASV_16s_4368 | 1.219279099 | 0.617386443  | 3.547568735 | 3.212582191  | 0.864664961 | NA |
| ASV_16s_4369 | 1.233392734 | 0.071480859  | 3.0973015   | 4.128381067  | 0.764877418 | NA |
| ASV_16s_4370 | 0.79066654  | -0.280123392 | 3.549558834 | 1.348151799  | 0.987106669 | NA |
| ASV_16s_4371 | 0.988058401 | 0.124956564  | 3.54930044  | 2.538963633  | NA          | NA |
| ASV_16s_4372 | 0.87922762  | 2.158531242  | 3.548856227 | 1.129757418  | 0.992455337 | NA |
| ASV_16s_4373 | 0.993596646 | -0.22466111  | 3.549211111 | 2.695556528  | 0.911666296 | NA |



|              |             |              |             |             |             |    |
|--------------|-------------|--------------|-------------|-------------|-------------|----|
| ASV_16s_4374 | 0.300672111 | -0.170201667 | 3.550594764 | 1.008727797 | NA          | NA |
| ASV_16s_4375 | 1.011108399 | 0.035577416  | 3.548958333 | 2.704921349 | 0.910892772 | NA |
| ASV_16s_4376 | 1.229851256 | -0.795055663 | 3.548168333 | 2.463927861 | 0.92978875  | NA |
| ASV_16s_4377 | 1.182775326 | -1.329994939 | 3.546894304 | 1.190341173 | NA          | NA |
| ASV_16s_4378 | 0.741129181 | -0.823680101 | 3.549824581 | 1.187439855 | 0.991213223 | NA |
| ASV_16s_4379 | 1.022608823 | 0.403629245  | 3.549523231 | 1.204393798 | NA          | NA |
| ASV_16s_4380 | 1.945511422 | -0.568530752 | 3.548889152 | 1.405918851 | 0.985389286 | NA |
| ASV_16s_4381 | 0.48397407  | 1.337512859  | 3.549871255 | 0.874448356 | NA          | NA |
| ASV_16s_4382 | 0.95858454  | -0.069751696 | 3.54971514  | 2.448959372 | 0.930891186 | NA |
| ASV_16s_4383 | 1.002401106 | 0.361983856  | 3.551289085 | 0.564903702 | NA          | NA |
| ASV_16s_4384 | 0.768519508 | -0.198450328 | 3.548659885 | 1.906542133 | NA          | NA |
| ASV_16s_4385 | 1.334806803 | 0.315939019  | 3.550641093 | 1.904916547 | 0.964914943 | NA |
| ASV_16s_4386 | 1.011176833 | -0.413288856 | 3.54917882  | 2.501070385 | 0.927016442 | NA |
| ASV_16s_4387 | 1.040798712 | -0.006140175 | 3.548238768 | 2.938493603 | 0.890633156 | NA |
| ASV_16s_4388 | 1.073560265 | 0.749673143  | 3.547968191 | 2.807028269 | 0.902261418 | NA |
| ASV_16s_4389 | 1.009639772 | 1.263061538  | 3.547548581 | 2.639435509 | 0.916236708 | NA |
| ASV_16s_4390 | 1.241920772 | -0.795970454 | 3.548003256 | 2.329195783 | 0.939400635 | NA |
| ASV_16s_4391 | 1.060306185 | 0.363018044  | 3.547446075 | 2.317185362 | 0.940223094 | NA |
| ASV_16s_4392 | 1.175768169 | -0.794349361 | 3.548319918 | 2.444695811 | 0.931203634 | NA |
| ASV_16s_4393 | 1.217180072 | -0.794021933 | 3.548381445 | 2.47722579  | 0.9288022   | NA |
| ASV_16s_4394 | 1.068623568 | -0.296807005 | 2.969219093 | 2.447379381 | 0.931007054 | NA |
| ASV_16s_4395 | 1.163574587 | -1.291779069 | 3.122568628 | 1.640715341 | 0.977034666 | NA |
| ASV_16s_4396 | 1.240970593 | 0.015282106  | 2.743912059 | 3.724753895 | 0.81087825  | NA |
| ASV_16s_4397 | 1.134559394 | -0.103913938 | 3.549741142 | 1.739759322 | NA          | NA |
| ASV_16s_4398 | 0.657515196 | 0.219964934  | 3.550620473 | 1.380252881 | 0.986168436 | NA |
| ASV_16s_4399 | 0.697533928 | -0.385969173 | 3.550240979 | 1.145793285 | NA          | NA |
| ASV_16s_4400 | 1.119413355 | 0.833328501  | 3.548416508 | 2.95221568  | 0.889387189 | NA |
| ASV_16s_4401 | 1.614217386 | 0.702611282  | 3.549304069 | 3.112608763 | 0.874393188 | NA |
| ASV_16s_4402 | 0.33397717  | -0.68096626  | 3.550065977 | 0.860675945 | NA          | NA |
| ASV_16s_4403 | 0.504570319 | 0.366653655  | 3.55061232  | 2.815434401 | NA          | NA |
| ASV_16s_4404 | 0.446224807 | 0.219980887  | 3.550641362 | 1.183251712 | 0.991307424 | NA |
| ASV_16s_4405 | 1.248457681 | -0.796100749 | 3.54799126  | 2.292147021 | 0.941919349 | NA |
| ASV_16s_4406 | 1.240688191 | -0.795271145 | 3.548125593 | 2.459052666 | 0.930148748 | NA |
| ASV_16s_4407 | 1.034478998 | 0.927654092  | 3.545599681 | 1.862271354 | 0.967068415 | NA |
| ASV_16s_4408 | 1.11854205  | 1.528757884  | 3.546390824 | 1.841894254 | NA          | NA |
| ASV_16s_4409 | 1.319761318 | 0.743343885  | 3.549384292 | 2.190543526 | 0.948545712 | NA |
| ASV_16s_4410 | 1.020090082 | -0.285232899 | 3.5491915   | 2.692599263 | 0.911909922 | NA |
| ASV_16s_4411 | 0.993300925 | -0.406240582 | 3.549185695 | 2.498440788 | 0.927214429 | NA |
| ASV_16s_4412 | 1.019868438 | 0.605265412  | 3.54796382  | 2.977775183 | 0.887050566 | NA |
| ASV_16s_4413 | 1.033848567 | 0.972383629  | 3.547901919 | 2.621464373 | 0.917676413 | NA |
| ASV_16s_4414 | 1.036360941 | -9.53E-04    | 3.547772412 | 2.652763201 | 0.915161492 | NA |
| ASV_16s_4415 | 1.062086649 | 1.201480271  | 3.547405764 | 2.458451061 | 0.93019311  | NA |
| ASV_16s_4416 | 1.041270367 | 1.616011096  | 3.546861316 | 2.451334957 | 0.930716793 | NA |
| ASV_16s_4417 | 0.999518664 | -1.763947288 | 3.547926686 | 1.211783021 | 0.990653061 | NA |
| ASV_16s_4418 | 1.059184318 | 2.332529033  | 3.546153959 | 2.226197418 | NA          | NA |
| ASV_16s_4419 | 1.326324889 | -1.56182125  | 2.042069013 | 3.965108906 | 0.783787312 | NA |
| ASV_16s_4420 | 1.175898891 | 1.61220385   | 3.148535787 | 2.552198716 | 0.923115428 | NA |
| ASV_16s_4421 | 0.743120723 | 1.118426606  | 3.550352565 | 1.021953208 | NA          | NA |
| ASV_16s_4422 | 1.525619482 | 0.419367759  | 3.549241857 | 1.2638565   | NA          | NA |
| ASV_16s_4423 | 1.09721312  | 0.419526563  | 3.548557063 | 1.673898894 | NA          | NA |
| ASV_16s_4424 | 1.704450581 | 1.206619877  | 3.549096462 | 1.332842742 | NA          | NA |
| ASV_16s_4425 | 1.341120569 | 1.180119897  | 3.549325369 | 1.470589581 | 0.983310416 | NA |
| ASV_16s_4426 | 1.682776502 | 1.206599433  | 3.549100279 | 1.328703767 | NA          | NA |
| ASV_16s_4427 | 0.972287689 | -0.199503123 | 3.549224304 | 2.675880183 | 0.913281462 | NA |
| ASV_16s_4428 | 1.070580687 | -0.427672132 | 3.549157981 | 2.524647331 | 0.925229689 | NA |
| ASV_16s_4429 | 0.28871181  | 0.205629015  | 3.550677272 | 1.083651976 | 0.993363938 | NA |
| ASV_16s_4430 | 0.92736892  | -0.68477163  | 3.549215552 | 1.189591779 | NA          | NA |
| ASV_16s_4431 | 0.396769094 | 0.250645625  | 3.550632005 | 2.247911287 | 0.944855211 | NA |
| ASV_16s_4432 | 0.999502602 | 0.365891143  | 3.549006322 | 2.728372829 | 0.908942217 | NA |
| ASV_16s_4433 | 0.943085856 | 0.054408282  | 3.548585921 | 2.771203671 | NA          | NA |
| ASV_16s_4434 | 1.040596164 | 0.062463877  | 3.548318948 | 2.971692146 | 0.887608527 | NA |
| ASV_16s_4435 | 1.073839717 | 0.19317482   | 3.548142333 | 3.238328212 | 0.862114576 | NA |
| ASV_16s_4436 | 1.007801693 | -0.16998535  | 3.548035665 | 2.83382405  | 0.899937492 | NA |
| ASV_16s_4437 | 1.215168109 | -0.796166828 | 3.548009531 | 2.186538547 | 0.948798391 | NA |
| ASV_16s_4438 | 0.95531093  | 8.78E-04     | 3.548251214 | 2.168840625 | NA          | NA |
| ASV_16s_4439 | 0.970465747 | -0.232402644 | 3.546854742 | 1.94934782  | 0.962590528 | NA |
| ASV_16s_4440 | 1.206262039 | -0.795195319 | 3.548153644 | 2.437660269 | 0.931717701 | NA |

|              |             |              |             |             |             |    |
|--------------|-------------|--------------|-------------|-------------|-------------|----|
| ASV_16s_4441 | 1.203422489 | -0.795127476 | 3.54815741  | 2.436378113 | 0.93181118  | NA |
| ASV_16s_4442 | 1.113859958 | -0.76903869  | 3.078257939 | 2.49701192  | 0.927321902 | NA |
| ASV_16s_4443 | 1.193288019 | -0.794299211 | 3.548329548 | 2.458614288 | 0.930181075 | NA |
| ASV_16s_4444 | 0.808804012 | 0.459889092  | 2.968199008 | 2.301943573 | 0.941258627 | NA |
| ASV_16s_4445 | 1.374636489 | -0.155781743 | 3.547815975 | 2.815834314 | 0.901500349 | NA |
| ASV_16s_4446 | 1.233589685 | -0.106802885 | 3.549445485 | 3.153118543 | 0.870485366 | NA |
| ASV_16s_4447 | 1.260243251 | -0.052198907 | 3.547754691 | 3.112463774 | 0.87440709  | NA |
| ASV_16s_4448 | 1.327117136 | 1.668607629  | 3.102026761 | 1.216128181 | 0.990550796 | NA |
| ASV_16s_4449 | 0.570191753 | 0.419125717  | 3.54979865  | 0.946580018 | NA          | NA |
| ASV_16s_4450 | 0.64092512  | 0.219965871  | 3.550621616 | 1.367250655 | 0.986553295 | NA |
| ASV_16s_4451 | 0.718300235 | 0.596370182  | 3.550588156 | 1.35562815  | NA          | NA |
| ASV_16s_4452 | 0.637320644 | 0.204462328  | 3.550588316 | 1.142240442 | 0.992196572 | NA |
| ASV_16s_4453 | 1.299546186 | 0.65828922   | 3.549408787 | 2.114958077 | 0.953204435 | NA |
| ASV_16s_4454 | 0.997687956 | 1.481218374  | 3.547632993 | 2.378508935 | NA          | NA |
| ASV_16s_4455 | 0.850819767 | 0.336449738  | 3.549754792 | 2.280366003 | NA          | NA |
| ASV_16s_4456 | 0.280272733 | -0.599073194 | 3.550819966 | 0.79262582  | NA          | NA |
| ASV_16s_4457 | 1.400977177 | 0.93725948   | 3.547373728 | 1.670883732 | NA          | NA |
| ASV_16s_4458 | 1.257025908 | 0.363452249  | 3.549757906 | 1.421129953 | 0.984915266 | NA |
| ASV_16s_4459 | 1.389475318 | 15.56070679  | 3.551461051 | 2.031046426 | 0.958102034 | NA |
| ASV_16s_4460 | 0.97232802  | -0.305408346 | 3.549204914 | 2.627953471 | 0.917157902 | NA |
| ASV_16s_4461 | 0.95369877  | -0.341323349 | 3.54810017  | 1.807890072 | NA          | NA |
| ASV_16s_4462 | 1.045049742 | 0.811530763  | 3.547734293 | 2.737964527 | 0.908138913 | NA |
| ASV_16s_4463 | 0.865316071 | 0.735441161  | 3.548522725 | 2.655898241 | NA          | NA |
| ASV_16s_4464 | 0.952735775 | 1.10446094   | 3.545284927 | 0.541307691 | 0.999280733 | NA |
| ASV_16s_4465 | 1.199004323 | -0.795047316 | 3.548174292 | 2.438070851 | 0.931687753 | NA |
| ASV_16s_4466 | 0.760887816 | 0.521444746  | 3.549028063 | 1.395002113 | 0.985723853 | NA |
| ASV_16s_4467 | 1.129385537 | 1.030911246  | 3.117289977 | 3.123824623 | 0.873315968 | NA |
| ASV_16s_4468 | 0.5830231   | 0.702604857  | 3.55103563  | 1.159484013 | NA          | NA |
| ASV_16s_4469 | 1.115237485 | 0.277612608  | 3.549342124 | 3.605837547 | NA          | NA |
| ASV_16s_4470 | 1.213191232 | 0.315939289  | 3.550646494 | 1.856241098 | 0.967366795 | NA |
| ASV_16s_4471 | 1.269424096 | 0.693981617  | 3.550610778 | 1.813729372 | 0.969427174 | NA |
| ASV_16s_4472 | 0.96366411  | -0.348397559 | 3.549201809 | 2.568500524 | 0.921851189 | NA |
| ASV_16s_4473 | 0.308798178 | 0.220002947  | 3.550670266 | 0.996581422 | NA          | NA |
| ASV_16s_4474 | 0.976986047 | -0.045035143 | 3.54817174  | 2.862386812 | 0.897433987 | NA |
| ASV_16s_4475 | 0.995553909 | 0.295938048  | 3.548096098 | 2.985059465 | 0.886380903 | NA |
| ASV_16s_4476 | 1.11989494  | 0.027335798  | 3.548059833 | 3.485964308 | 0.836709885 | NA |
| ASV_16s_4477 | 1.195846427 | -0.795805766 | 3.548048479 | 2.341472142 | 0.938554092 | NA |
| ASV_16s_4478 | 1.022487207 | 5.899465753  | 3.548283374 | 0.272589589 | 0.999927703 | NA |
| ASV_16s_4479 | 1.163122387 | 1.657243399  | 3.035010427 | 1.852433349 | 0.967554422 | NA |
| ASV_16s_4480 | 1.202856142 | -0.926100399 | 3.547406657 | 2.00074786  | 0.959798965 | NA |
| ASV_16s_4481 | 1.142022604 | -0.865639609 | 3.548199827 | 1.865168838 | 0.966924505 | NA |
| ASV_16s_4482 | 1.211393703 | -0.588431925 | 3.250712407 | 4.010576774 | 0.778558366 | NA |
| ASV_16s_4483 | 1.694424879 | -0.010679766 | 3.546465278 | 2.423606191 | 0.932738908 | NA |
| ASV_16s_4484 | 1.23649244  | 1.839267438  | 3.548147849 | 1.553491482 | NA          | NA |
| ASV_16s_4485 | 1.128799944 | 1.144892982  | 3.548128667 | 3.147627412 | 0.87101783  | NA |
| ASV_16s_4486 | 0.420421742 | 0.366448557  | 3.549167768 | 1.190542847 | NA          | NA |
| ASV_16s_4487 | 0.741678478 | 0.307765239  | 3.550151288 | 1.420297094 | NA          | NA |
| ASV_16s_4488 | 1.308881839 | 0.299920543  | 3.549729347 | 3.271706739 | NA          | NA |
| ASV_16s_4489 | 1.399441759 | 16.03371649  | 3.55145465  | 2.049904928 | 0.957026633 | NA |
| ASV_16s_4490 | 0.986463558 | 12.86498428  | 3.551621254 | 0.926041244 | NA          | NA |
| ASV_16s_4491 | 1.422997982 | 1.188549958  | 3.446469506 | 1.473487506 | 0.983213352 | NA |
| ASV_16s_4492 | 0.936632069 | 0.454567365  | 3.549026727 | 2.73132817  | NA          | NA |
| ASV_16s_4493 | 0.930104639 | 0.005775005  | 3.548295214 | 2.836758591 | NA          | NA |
| ASV_16s_4494 | 1.029966137 | -0.224178362 | 3.548020485 | 2.160208115 | NA          | NA |
| ASV_16s_4495 | 0.93343792  | -0.052879838 | 3.548183771 | 2.802340607 | NA          | NA |
| ASV_16s_4496 | 1.001902046 | 0.317218152  | 3.548062039 | 2.837536377 | 0.899613639 | NA |
| ASV_16s_4497 | 1.02792775  | 0.779351557  | 3.547990851 | 2.933979271 | 0.891041752 | NA |
| ASV_16s_4498 | 1.140439923 | -0.640172384 | 3.548138641 | 2.316364906 | NA          | NA |
| ASV_16s_4499 | 0.933185419 | -0.198400505 | 3.548681701 | 2.17716085  | NA          | NA |
| ASV_16s_4500 | 1.162460828 | -1.295753704 | 3.547956463 | 2.09731747  | 0.954258111 | NA |
| ASV_16s_4501 | 1.141199836 | -0.634505114 | 3.27013995  | 2.457348871 | 0.930274348 | NA |
| ASV_16s_4502 | 1.21217365  | -0.794926136 | 3.548194457 | 2.455419416 | NA          | NA |
| ASV_16s_4503 | 1.037945148 | 0.564373696  | 3.547836101 | 2.82165555  | 0.900995815 | NA |
| ASV_16s_4504 | 1.006386117 | -0.93153372  | 3.54880981  | 1.985800341 | NA          | NA |
| ASV_16s_4505 | 1.057297423 | 0.188766201  | 3.548267575 | 2.261729544 | NA          | NA |
| ASV_16s_4506 | 1.206479127 | -0.619531516 | 2.70517018  | 2.244558834 | 0.94507452  | NA |
| ASV_16s_4507 | 0.978290844 | -0.061614817 | 3.549677878 | 2.295591293 | 0.941687486 | NA |

|              |             |              |             |             |             |    |
|--------------|-------------|--------------|-------------|-------------|-------------|----|
| ASV_16s_4508 | 1.144363047 | -0.127290893 | 3.546187652 | 2.610990555 | 0.918510105 | NA |
| ASV_16s_4509 | 1.55457887  | 0.323370191  | 3.549546971 | 1.378176317 | NA          | NA |
| ASV_16s_4510 | 1.313822093 | 0.344166559  | 3.549574512 | 2.503031397 | NA          | NA |
| ASV_16s_4511 | 1.422231233 | -14.90975477 | 3.552157344 | 0.561434356 | 0.999188999 | NA |
| ASV_16s_4512 | 1.009416145 | 0.688686788  | 3.550620278 | 1.672294797 | NA          | NA |
| ASV_16s_4513 | 0.988826951 | -5.00E-04    | 3.549114142 | 2.656737102 | 0.914839665 | NA |
| ASV_16s_4514 | 0.919699797 | 0.408770411  | 3.548147578 | 2.557069983 | 0.92273868  | NA |
| ASV_16s_4515 | 1.039888675 | 0.507128626  | 3.547926581 | 3.052185197 | 0.880133052 | NA |
| ASV_16s_4516 | 1.003298144 | 0.670940013  | 3.547512759 | 2.971164107 | 0.887656906 | NA |
| ASV_16s_4517 | 0.809652241 | 0.627572957  | 3.547392586 | 1.522390634 | NA          | NA |
| ASV_16s_4518 | 1.436955162 | 3.832598804  | 2.846303009 | 0.583778869 | 0.999078245 | NA |
| ASV_16s_4519 | 1.232589623 | 2.075070913  | 2.76642822  | 3.473474652 | 0.838026982 | NA |
| ASV_16s_4520 | 1.352889161 | 1.113748117  | 3.549767486 | 1.587081453 | 0.979140879 | NA |
| ASV_16s_4521 | 0.921760946 | -0.214221735 | 3.549241617 | 2.623050683 | NA          | NA |
| ASV_16s_4522 | 0.926088414 | -0.2283263   | 3.549236986 | 2.625444233 | NA          | NA |
| ASV_16s_4523 | 0.962351845 | -0.361501421 | 3.549200867 | 2.547837784 | 0.92345196  | NA |
| ASV_16s_4524 | 0.323768261 | -0.680784649 | 3.550107583 | 0.850697867 | NA          | NA |
| ASV_16s_4525 | 0.94046756  | -0.044472231 | 3.549161309 | 2.594598072 | NA          | NA |
| ASV_16s_4526 | 0.980667114 | 0.113980973  | 3.548430573 | 2.915384856 | 0.892717892 | NA |
| ASV_16s_4527 | 1.019290352 | 0.123415319  | 3.548379453 | 2.983042638 | 0.886566481 | NA |
| ASV_16s_4528 | 0.967836948 | -0.276120088 | 3.548052547 | 2.728606692 | 0.908922669 | NA |
| ASV_16s_4529 | 1.219991212 | -0.796046579 | 3.548006564 | 2.269955642 | 0.94340192  | NA |
| ASV_16s_4530 | 1.025904058 | -0.077309012 | 3.55036079  | 1.116119967 | NA          | NA |
| ASV_16s_4531 | 0.761622821 | 1.339128081  | 3.549507369 | 1.020404304 | NA          | NA |
| ASV_16s_4532 | 1.311594471 | 1.177996769  | 3.548770845 | 1.466400853 | NA          | NA |
| ASV_16s_4533 | 1.144748376 | 0.346880855  | 3.550457948 | 1.226921841 | 0.99029376  | NA |
| ASV_16s_4534 | 1.253070572 | 0.36586527   | 3.550131029 | 2.17821035  | 0.949321746 | NA |
| ASV_16s_4535 | 1.242625807 | 0.351824791  | 3.550642922 | 2.791042183 | 0.90363634  | NA |
| ASV_16s_4536 | 1.532391917 | 1.188243329  | 3.54941959  | 1.413047476 | 0.985168277 | NA |
| ASV_16s_4537 | 0.984255593 | -0.274786149 | 3.549206591 | 2.66474647  | 0.914189309 | NA |
| ASV_16s_4538 | 0.983151195 | -0.280568029 | 3.549205738 | 2.659656852 | 0.914602848 | NA |
| ASV_16s_4539 | 0.922788139 | -0.268137824 | 3.549232082 | 2.605441894 | 0.918950152 | NA |
| ASV_16s_4540 | 0.912614793 | -0.35962573  | 3.5492216   | 2.498431049 | NA          | NA |
| ASV_16s_4541 | 0.196307095 | -0.170005243 | 3.550641862 | 0.795520045 | 0.997489404 | NA |
| ASV_16s_4542 | 0.584411357 | 0.219969322  | 3.550625994 | 1.320307353 | NA          | NA |
| ASV_16s_4543 | 1.182987262 | -0.795293716 | 3.548108567 | 2.38932978  | 0.935197596 | NA |
| ASV_16s_4544 | 1.162009625 | -0.647878876 | 3.547007337 | 2.629432533 | 0.917039505 | NA |
| ASV_16s_4545 | 1.014807231 | -0.482668994 | 3.548352726 | 2.24775205  | 0.944865638 | NA |
| ASV_16s_4546 | 1.216773605 | -0.810174517 | 3.549649319 | 2.22071861  | 0.946621066 | NA |
| ASV_16s_4547 | 0.634348008 | 0.587110199  | 3.550425464 | 1.69264179  | 0.974882245 | NA |
| ASV_16s_4548 | 1.067614062 | 0.300215522  | 3.551190541 | 0.622650462 | 0.998862063 | NA |
| ASV_16s_4549 | 1.215642922 | 2.202184577  | 2.741301823 | 1.980338018 | 0.960920585 | NA |
| ASV_16s_4550 | 0.676049294 | 0.30478238   | 3.551511384 | 0.442658847 | NA          | NA |
| ASV_16s_4551 | 1.286628537 | 0.349773164  | 3.549819606 | 2.392920391 | 0.93494217  | NA |
| ASV_16s_4552 | 1.310633    | 0.344500113  | 3.549661214 | 2.426432715 | NA          | NA |
| ASV_16s_4553 | 0.32085143  | -0.680729544 | 3.55011995  | 0.847790119 | NA          | NA |
| ASV_16s_4554 | 0.959238491 | 0.089615476  | 3.548421795 | 2.944322364 | 0.890104632 | NA |
| ASV_16s_4555 | 0.936097539 | 0.634979066  | 3.548128109 | 2.351873562 | NA          | NA |
| ASV_16s_4556 | 1.205895608 | -0.795802726 | 3.548032719 | 2.329217797 | 0.939399122 | NA |
| ASV_16s_4557 | 1.007668457 | 0.293012478  | 2.957276309 | 3.036622439 | 0.881593804 | NA |
| ASV_16s_4558 | 1.02819859  | -1.261019943 | 3.548063145 | 1.701807746 | 0.974490686 | NA |
| ASV_16s_4559 | 1.017741222 | -0.869017247 | 3.548589227 | 1.486036898 | 0.982789128 | NA |
| ASV_16s_4560 | 1.154485988 | -0.793396581 | 3.54851775  | 2.432010088 | 0.93212917  | NA |
| ASV_16s_4561 | 1.4127468   | 0.876950006  | 3.546999643 | 1.755523668 | NA          | NA |
| ASV_16s_4562 | 1.025098396 | 0.220156235  | 3.548325507 | 2.711991388 | NA          | NA |
| ASV_16s_4563 | 0.691077823 | -0.164914949 | 3.550460729 | 1.309609785 | 0.988180457 | NA |
| ASV_16s_4564 | 0.764909603 | 0.253211742  | 3.550593352 | 0.432440076 | 0.999658195 | NA |
| ASV_16s_4565 | 1.298911694 | 0.419766189  | 3.549639181 | 1.016673263 | 0.994555071 | NA |
| ASV_16s_4566 | 1.308936693 | 0.342984353  | 3.549317031 | 2.931887929 | 0.891230821 | NA |
| ASV_16s_4567 | 1.166170711 | 0.693099814  | 3.548402197 | 3.188985937 | 0.866986413 | NA |
| ASV_16s_4568 | 1.204888636 | 0.315939157  | 3.550646902 | 1.85272818  | 0.967539916 | NA |
| ASV_16s_4569 | 1.228404718 | 0.69397799   | 3.550612732 | 1.796984683 | 0.97021799  | NA |
| ASV_16s_4570 | 0.964207008 | -0.265643295 | 3.549215662 | 2.650154998 | 0.915372411 | NA |
| ASV_16s_4571 | 0.903795111 | -0.271654238 | 3.549239821 | 2.58275343  | NA          | NA |
| ASV_16s_4572 | 0.982299964 | 0.376082292  | 3.548808302 | 2.6431683   | 0.915936206 | NA |
| ASV_16s_4573 | 0.084048554 | 0.916771462  | 3.551704655 | 0.35109863  | 0.999829915 | NA |
| ASV_16s_4574 | 0.936025468 | 0.104782299  | 3.548314948 | 2.953720675 | 0.889250173 | NA |

|              |             |              |             |             |             |    |
|--------------|-------------|--------------|-------------|-------------|-------------|----|
| ASV_16s_4575 | 1.157470294 | -0.795560203 | 3.548077339 | 2.321781775 | 0.93990901  | NA |
| ASV_16s_4576 | 0.953178898 | 0.927859293  | 3.54632851  | 1.996095343 | 0.960056166 | NA |
| ASV_16s_4577 | 1.070995888 | -0.632140157 | 3.050134222 | 3.118741978 | 0.873804579 | NA |
| ASV_16s_4578 | 0.898255501 | 1.550115167  | 3.54736635  | 2.000282561 | NA          | NA |
| ASV_16s_4579 | 1.053148934 | 0.332617321  | 3.548127735 | 3.100928662 | 0.875511109 | NA |
| ASV_16s_4580 | 1.175540827 | -0.794815556 | 3.548224105 | 2.430453451 | 0.932242315 | NA |
| ASV_16s_4581 | 1.315356987 | 0.530144871  | 3.549001688 | 1.954041341 | NA          | NA |
| ASV_16s_4582 | 1.056401848 | -0.157090426 | 3.549315158 | 2.131437868 | 0.952208572 | NA |
| ASV_16s_4583 | 1.173681395 | 1.206061022  | 3.549230159 | 1.212466119 | NA          | NA |
| ASV_16s_4584 | 0.626127205 | 0.512299398  | 3.550542159 | 1.56816265  | 0.979855614 | NA |
| ASV_16s_4585 | 0.917835566 | -0.069717925 | 3.549465798 | 2.645609464 | NA          | NA |
| ASV_16s_4586 | 0.911210199 | -0.868262684 | 3.548865312 | 2.143069937 | NA          | NA |
| ASV_16s_4587 | 1.28628598  | 0.70680107   | 3.294516098 | 1.028751459 | 0.994351306 | NA |
| ASV_16s_4588 | 1.519878448 | 0.323367855  | 3.549560036 | 1.370879892 | NA          | NA |
| ASV_16s_4589 | 0.921785834 | 0.035172604  | 3.54882606  | 2.200492498 | NA          | NA |
| ASV_16s_4590 | 1.204339772 | 0.106832118  | 3.549326006 | 2.959661167 | 0.888708648 | NA |
| ASV_16s_4591 | 1.244930177 | 0.638321066  | 3.550617976 | 2.900656475 | 0.894037662 | NA |
| ASV_16s_4592 | 1.428288022 | 1.188027368  | 3.549467821 | 1.395841926 | 0.985698282 | NA |
| ASV_16s_4593 | 0.317934599 | -0.68067347  | 3.550132542 | 0.844856085 | NA          | NA |
| ASV_16s_4594 | 0.939935839 | 0.128678428  | 3.54875295  | 2.76246391  | 0.906072643 | NA |
| ASV_16s_4595 | 1.102175503 | -0.814183792 | 3.548232647 | 1.775638392 | 0.971209145 | NA |
| ASV_16s_4596 | 1.005203998 | 2.484997506  | 3.546094927 | 2.019069392 | 0.958777379 | NA |
| ASV_16s_4597 | 1.095988519 | -1.490539173 | 3.54764576  | 2.062836849 | 0.9562807   | NA |
| ASV_16s_4598 | 0.997351504 | 2.001863812  | 3.546252976 | 2.055548516 | NA          | NA |
| ASV_16s_4599 | 1.260233194 | -1.139753164 | 2.981739782 | 2.410467975 | 0.933686694 | NA |
| ASV_16s_4600 | 1.054635263 | 0.210853571  | 3.548315893 | 2.351103878 | NA          | NA |
| ASV_16s_4601 | 1.264585989 | 0.368358562  | 3.549070213 | 1.60111046  | 0.978601395 | NA |
| ASV_16s_4602 | 1.027296763 | 0.171580498  | 3.547226225 | 2.558473419 | NA          | NA |
| ASV_16s_4603 | 0.787943288 | -0.274955942 | 3.548837065 | 1.791752291 | NA          | NA |
| ASV_16s_4604 | 0.884063895 | -1.033596384 | 3.548070048 | 2.8525117   | NA          | NA |
| ASV_16s_4605 | 0.266068389 | 0.279417522  | 3.551407144 | 0.794111468 | NA          | NA |
| ASV_16s_4606 | 1.253729456 | 0.661900091  | 3.548811673 | 2.528247247 | 0.924955041 | NA |
| ASV_16s_4607 | 1.28825526  | 0.693987117  | 3.550609923 | 1.821215001 | 0.969069854 | NA |
| ASV_16s_4608 | 0.95828857  | -0.333012706 | 3.548452749 | 2.368682499 | NA          | NA |
| ASV_16s_4609 | 0.904075982 | -0.036255393 | 3.548213735 | 2.789223111 | NA          | NA |
| ASV_16s_4610 | 0.915565178 | 1.083469698  | 3.547764042 | 2.566047135 | NA          | NA |
| ASV_16s_4611 | 1.086059067 | -0.98004268  | 3.011351332 | 1.509810283 | 0.981968084 | NA |
| ASV_16s_4612 | 1.556521693 | 2.553136338  | 3.547961571 | 0.833201322 | NA          | NA |
| ASV_16s_4613 | 0.454642308 | 1.337228667  | 3.549935466 | 0.854302766 | NA          | NA |
| ASV_16s_4614 | 0.454642308 | 1.337228667  | 3.549935466 | 0.854302766 | NA          | NA |
| ASV_16s_4615 | 0.61914259  | 0.21211897   | 3.550603279 | 1.233641036 | 0.990131581 | NA |
| ASV_16s_4616 | 0.968885309 | 0.078109389  | 3.549669432 | 2.82148342  | NA          | NA |
| ASV_16s_4617 | 0.71003134  | -0.092246671 | 3.549583873 | 1.932503343 | NA          | NA |
| ASV_16s_4618 | 1.203787361 | 0.36764395   | 3.550266028 | 1.138613444 | 0.992272324 | NA |
| ASV_16s_4619 | 1.352805631 | 1.057785489  | 3.550150194 | 2.491188625 | 0.927759107 | NA |
| ASV_16s_4620 | 1.190549257 | 0.346432695  | 3.550467333 | 1.538232812 | 0.980956445 | NA |
| ASV_16s_4621 | 1.262627581 | 0.930403294  | 3.550533687 | 1.649770511 | 0.976667358 | NA |
| ASV_16s_4622 | 0.890141866 | -0.192253501 | 3.549260661 | 2.588253076 | NA          | NA |
| ASV_16s_4623 | 0.930826678 | -0.407730689 | 3.549210525 | 2.431515    | 0.932165166 | NA |
| ASV_16s_4624 | 0.962357701 | 0.247586606  | 3.548488577 | 2.574403842 | 0.921390956 | NA |
| ASV_16s_4625 | 0.979606166 | 0.817631323  | 3.547910502 | 2.932918788 | NA          | NA |
| ASV_16s_4626 | 1.001403623 | 0.153075204  | 3.548052045 | 3.332933352 | 0.852591258 | NA |
| ASV_16s_4627 | 1.101738001 | 0.629450828  | 3.546998511 | 3.054105452 | NA          | NA |
| ASV_16s_4628 | 0.967401724 | -0.852794979 | 3.548093477 | 1.959378257 | 0.962054402 | NA |
| ASV_16s_4629 | 1.169042134 | -0.864581357 | 3.547971143 | 2.118639482 | 0.952982935 | NA |
| ASV_16s_4630 | 1.145941015 | -0.79479429  | 3.548233317 | 2.405904725 | 0.934014326 | NA |
| ASV_16s_4631 | 0.647792522 | 0.730083977  | 3.54769274  | 2.178686467 | NA          | NA |
| ASV_16s_4632 | 1.0437248   | 0.223280235  | 3.548643177 | 1.724526379 | 0.973505107 | NA |
| ASV_16s_4633 | 1.148283785 | 1.47791374   | 3.294623638 | 2.029719536 | 0.958177145 | NA |
| ASV_16s_4634 | 1.235258636 | 2.850358279  | 3.547946041 | 0.708978134 | NA          | NA |
| ASV_16s_4635 | 0.919947551 | 0.253109529  | 3.550934511 | 0.347228464 | 0.999836142 | NA |
| ASV_16s_4636 | 0.930546382 | 0.585257118  | 3.54796372  | 2.583127013 | NA          | NA |
| ASV_16s_4637 | 1.317843873 | -0.606718241 | 3.548684555 | 2.260964411 | 0.943997021 | NA |
| ASV_16s_4638 | 0.972357953 | 1.552301755  | 3.54835412  | 1.891621633 | NA          | NA |
| ASV_16s_4639 | 1.14980435  | -0.09418312  | 3.550290814 | 2.07106811  | 0.955802314 | NA |
| ASV_16s_4640 | 1.267552983 | 0.365868812  | 3.550130356 | 2.184388451 | 0.948933776 | NA |
| ASV_16s_4641 | 1.168452542 | 0.332210386  | 3.550624221 | 1.654916995 | 0.976457087 | NA |

|              |             |              |             |             |             |    |
|--------------|-------------|--------------|-------------|-------------|-------------|----|
| ASV_16s_4642 | 0.929588775 | -0.251419022 | 3.549231599 | 2.62138288  | 0.917682915 | NA |
| ASV_16s_4643 | 0.912677793 | -0.274554778 | 3.5492353   | 2.590467438 | 0.92013213  | NA |
| ASV_16s_4644 | 0.887758359 | -0.296804968 | 3.54924175  | 2.54610858  | NA          | NA |
| ASV_16s_4645 | 0.892902512 | -0.347305533 | 3.549231698 | 2.494816422 | NA          | NA |
| ASV_16s_4646 | 0.313559352 | -0.680583015 | 3.550151861 | 0.840404178 | NA          | NA |
| ASV_16s_4647 | 0.301953816 | 0.202748146  | 3.550666472 | 1.170211685 | 0.991596672 | NA |
| ASV_16s_4648 | 0.950650174 | -0.314778058 | 3.549142201 | 2.387826092 | 0.935304416 | NA |
| ASV_16s_4649 | 0.95696161  | 0.013759171  | 3.548308621 | 2.84424441  | 0.899027287 | NA |
| ASV_16s_4650 | 0.942911341 | 0.540554985  | 3.548643396 | 2.787583239 | 0.903932696 | NA |
| ASV_16s_4651 | 0.957103186 | 0.084174084  | 3.548324294 | 2.933440377 | 0.891090484 | NA |
| ASV_16s_4652 | 0.99608231  | -0.757880096 | 3.09239107  | 2.565532318 | 0.92208211  | NA |
| ASV_16s_4653 | 0.905529018 | 2.033719891  | 3.546657985 | 2.199449511 | 0.947981493 | NA |
| ASV_16s_4654 | 1.23356848  | 0.172912053  | 3.546144959 | 2.380457824 | 0.935826577 | NA |
| ASV_16s_4655 | 1.131833393 | -0.79498156  | 3.548195449 | 2.379835706 | 0.935870568 | NA |
| ASV_16s_4656 | 1.143225049 | -0.83397662  | 3.283329609 | 2.271365842 | 0.943308291 | NA |
| ASV_16s_4657 | 1.026721283 | -0.882729879 | 3.548161768 | 1.219995174 | NA          | NA |
| ASV_16s_4658 | 1.12279309  | -0.962208311 | 3.091268867 | 1.97288145  | 0.961326042 | NA |
| ASV_16s_4659 | 1.047593679 | 0.215282569  | 3.549756723 | 1.243861891 | NA          | NA |
| ASV_16s_4660 | 1.104993577 | -0.950591911 | 3.545837972 | 1.291561013 | NA          | NA |
| ASV_16s_4661 | 0.530985629 | 0.431013193  | 3.549394817 | 2.651928806 | NA          | NA |
| ASV_16s_4662 | 0.611193595 | 0.219967568  | 3.550623819 | 1.343072579 | 0.987251453 | NA |
| ASV_16s_4663 | 0.975559023 | 0.665435427  | 3.549399851 | 2.468321289 | 0.929463552 | NA |
| ASV_16s_4664 | 1.107033607 | 1.223198436  | 3.547921403 | 1.74585299  | NA          | NA |
| ASV_16s_4665 | 1.008457152 | 0.741454003  | 3.548719206 | 2.8667105   | NA          | NA |
| ASV_16s_4666 | 1.283430034 | -0.194558067 | 3.548786155 | 2.418600773 | 0.933100781 | NA |
| ASV_16s_4667 | 1.119142217 | -0.247977128 | 3.547119147 | 2.9576455   | 0.888892517 | NA |
| ASV_16s_4668 | 1.134037267 | -0.63559247  | 3.549157458 | 2.235608702 | 0.945657805 | NA |
| ASV_16s_4669 | 0.967698252 | -0.260662634 | 3.549214998 | 2.656438841 | 0.914863839 | NA |
| ASV_16s_4670 | 0.884156647 | -0.281975924 | 3.549246388 | 2.554017636 | NA          | NA |
| ASV_16s_4671 | 0.312100937 | -0.680553998 | 3.55015842  | 0.838906717 | NA          | NA |
| ASV_16s_4672 | 0.890773967 | 0.272733795  | 3.549021956 | 2.551557969 | NA          | NA |
| ASV_16s_4673 | 0.890164151 | 0.122144802  | 3.548896435 | 2.684117956 | NA          | NA |
| ASV_16s_4674 | 1.028724574 | -0.584139887 | 2.897189095 | 2.652810639 | 0.915157654 | NA |
| ASV_16s_4675 | 0.983575111 | 1.992780108  | 3.277673125 | 1.281886445 | 0.988917691 | NA |
| ASV_16s_4676 | 1.037666008 | -0.546772386 | 3.548165587 | 2.251993701 | 0.944587542 | NA |
| ASV_16s_4677 | 0.946229212 | 1.42780575   | 3.547220849 | 2.337368847 | NA          | NA |
| ASV_16s_4678 | 0.933096297 | -0.55564753  | 3.547489396 | 1.757520343 | 0.972035479 | NA |
| ASV_16s_4679 | 0.964304367 | 1.095271243  | 3.545765554 | 1.848783386 | NA          | NA |
| ASV_16s_4680 | 1.143291489 | -0.795028395 | 3.54818534  | 2.38762611  | 0.935318616 | NA |
| ASV_16s_4681 | 1.09928762  | -0.794299731 | 3.548336368 | 2.383291748 | 0.935625998 | NA |
| ASV_16s_4682 | 1.128349504 | 0.714157111  | 3.549889304 | 2.264098808 | 0.943789932 | NA |
| ASV_16s_4683 | 1.127065159 | -0.915539397 | 3.277902276 | 2.207668045 | 0.947457979 | NA |
| ASV_16s_4684 | 0.974242283 | -0.104155189 | 3.549518806 | 2.198268278 | 0.948056512 | NA |
| ASV_16s_4685 | 0.608315259 | 0.219967779  | 3.550624044 | 1.340670304 | 0.987319582 | NA |
| ASV_16s_4686 | 0.677164098 | 0.596363344  | 3.550590482 | 1.325615356 | NA          | NA |
| ASV_16s_4687 | 1.115954627 | 0.181513132  | 3.547954597 | 3.283897081 | 0.857556792 | NA |
| ASV_16s_4688 | 0.923532181 | 1.589468127  | 3.548950001 | 1.44115197  | 0.984277345 | NA |
| ASV_16s_4689 | 1.111108882 | 0.312248278  | 3.549347936 | 3.230912498 | 0.862851022 | NA |
| ASV_16s_4690 | 0.402251597 | 0.596288877  | 3.550618224 | 1.061156821 | NA          | NA |
| ASV_16s_4691 | 0.950878439 | 0.04694393   | 3.5489857   | 2.652980546 | 0.915143905 | NA |
| ASV_16s_4692 | 0.962294911 | 0.049158807  | 3.548119235 | 3.056021717 | 0.879771829 | NA |
| ASV_16s_4693 | 0.996676134 | 0.672837394  | 3.547770028 | 2.720109434 | 0.90963171  | NA |
| ASV_16s_4694 | 1.173304695 | -0.795668079 | 3.548070629 | 2.338065227 | 0.938789617 | NA |
| ASV_16s_4695 | 1.145321243 | -0.795356048 | 3.548118071 | 2.349656147 | 0.937986456 | NA |
| ASV_16s_4696 | 1.137780815 | -0.795256564 | 3.548143881 | 2.359702632 | 0.937286049 | NA |
| ASV_16s_4697 | 1.131370908 | -0.795118329 | 3.548170311 | 2.367797026 | 0.936718864 | NA |
| ASV_16s_4698 | 1.064318567 | 0.189970211  | 3.548195089 | 3.273100952 | 0.85864161  | NA |
| ASV_16s_4699 | 1.106674017 | -0.794079141 | 3.548378902 | 2.393996531 | 0.934865518 | NA |
| ASV_16s_4700 | 1.17862609  | 1.786871277  | 3.111581644 | 2.140424444 | 0.951660838 | NA |
| ASV_16s_4701 | 0.378046923 | -0.268116163 | 3.550119489 | 0.935580467 | NA          | NA |
| ASV_16s_4702 | 1.017378218 | 2.271906273  | 2.891433737 | 2.464338883 | 0.929758358 | NA |
| ASV_16s_4703 | 1.431872629 | 2.309776871  | 3.548169491 | 0.803054236 | NA          | NA |
| ASV_16s_4704 | 1.426789727 | 2.846448033  | 3.544888715 | 1.546928424 | NA          | NA |
| ASV_16s_4705 | 0.793277394 | 0.763749631  | 3.5500451   | 1.173687285 | NA          | NA |
| ASV_16s_4706 | 1.592315674 | 1.206533318  | 3.549117317 | 1.310860349 | NA          | NA |
| ASV_16s_4707 | 1.185059445 | 0.919363076  | 3.550404704 | 1.951133422 | 0.962495395 | NA |
| ASV_16s_4708 | 1.267308847 | 0.698683492  | 3.54939362  | 2.603363778 | 0.919114672 | NA |

|              |             |              |             |             |             |    |
|--------------|-------------|--------------|-------------|-------------|-------------|----|
| ASV_16s_4709 | 1.11733176  | 0.361635158  | 3.55023106  | 1.451916779 | 0.983927773 | NA |
| ASV_16s_4710 | 1.385884124 | 1.124853427  | 3.549835311 | 2.374397307 | NA          | NA |
| ASV_16s_4711 | 1.276951479 | 1.183543591  | 3.54988939  | 1.45160438  | 0.983937983 | NA |
| ASV_16s_4712 | 0.865541445 | -0.238551409 | 3.549262426 | 2.555990958 | NA          | NA |
| ASV_16s_4713 | 0.932243426 | -0.290502624 | 3.549223665 | 2.599567445 | 0.919414815 | NA |
| ASV_16s_4714 | 0.309184105 | -0.680495224 | 3.550171723 | 0.835890934 | NA          | NA |
| ASV_16s_4715 | 0.1662589   | -0.16991077  | 3.550666351 | 0.714805517 | NA          | NA |
| ASV_16s_4716 | 0.879166738 | -0.441579789 | 3.549309347 | 2.02691414  | NA          | NA |
| ASV_16s_4717 | 1.008284849 | -0.036698968 | 3.5481868   | 2.884818091 | 0.895449066 | NA |
| ASV_16s_4718 | 0.251885962 | -0.54730814  | 3.550003242 | 0.676374772 | NA          | NA |
| ASV_16s_4719 | 1.096675677 | -0.793222824 | 3.548559031 | 2.389910972 | 0.935156286 | NA |
| ASV_16s_4720 | 0.993995032 | -0.022196334 | 3.549282407 | 1.515201811 | 0.981778702 | NA |
| ASV_16s_4721 | 1.16664186  | -0.412900173 | 3.547522585 | 3.015610169 | 0.883554416 | NA |
| ASV_16s_4722 | 1.154352214 | 0.106996982  | 3.550594977 | 1.871864924 | 0.966590588 | NA |
| ASV_16s_4723 | 0.62135309  | -0.516783016 | 3.550170094 | 1.149862053 | 0.992035872 | NA |
| ASV_16s_4724 | 0.62436068  | 0.219966784  | 3.550622818 | 1.353904059 | 0.986941493 | NA |
| ASV_16s_4725 | 0.979348535 | -0.11796709  | 3.548903468 | 2.29068789  | NA          | NA |
| ASV_16s_4726 | 1.471297859 | 0.323364414  | 3.549579357 | 1.360379937 | NA          | NA |
| ASV_16s_4727 | 1.342693232 | 0.607718926  | 3.549332725 | 2.809914441 | 0.902012266 | NA |
| ASV_16s_4728 | 0.30772569  | -0.680465453 | 3.550178468 | 0.834372468 | NA          | NA |
| ASV_16s_4729 | 0.364020455 | 0.031537286  | 3.550606901 | 2.015808619 | 0.958960214 | NA |
| ASV_16s_4730 | 0.881675575 | 0.021966253  | 3.548713704 | 2.62210971  | 0.917624915 | NA |
| ASV_16s_4731 | 0.880208737 | -0.158510712 | 3.548242467 | 2.442132669 | NA          | NA |
| ASV_16s_4732 | 1.000357414 | 0.217998821  | 3.547724233 | 2.544329629 | 0.923722172 | NA |
| ASV_16s_4733 | 1.046151786 | 0.413951412  | 3.546882983 | 2.719793873 | NA          | NA |
| ASV_16s_4734 | 1.154379908 | -0.795037688 | 3.548181973 | 2.397546029 | 0.934612376 | NA |
| ASV_16s_4735 | 1.124218962 | -0.9309493   | 3.087937636 | 2.305970426 | 0.940985935 | NA |
| ASV_16s_4736 | 1.099847653 | -1.667463247 | 3.546621025 | 1.861192655 | 0.967121901 | NA |
| ASV_16s_4737 | 0.934071263 | 0.403608836  | 3.549581306 | 1.175155556 | NA          | NA |
| ASV_16s_4738 | 0.94287491  | -0.208505221 | 3.547832801 | 1.984699394 | 0.960682361 | NA |
| ASV_16s_4739 | 0.94939634  | 0.136292487  | 3.549101553 | 3.536217613 | 0.831374599 | NA |
| ASV_16s_4740 | 1.363821888 | -0.891944529 | 3.548643737 | 2.274389997 | NA          | NA |
| ASV_16s_4741 | 0.878732184 | 2.751151842  | 3.548295942 | 0.608035891 | NA          | NA |
| ASV_16s_4742 | 1.142725015 | -0.096929459 | 3.549899834 | 1.490727736 | 0.98262893  | NA |
| ASV_16s_4743 | 1.340337052 | 0.675871478  | 3.550649869 | 2.939337371 | NA          | NA |
| ASV_16s_4744 | 1.166365703 | 0.693961796  | 3.550615949 | 1.770566725 | 0.971441836 | NA |
| ASV_16s_4745 | 0.873032418 | -0.068769247 | 3.549312531 | 2.480585927 | NA          | NA |
| ASV_16s_4746 | 0.91541019  | -0.249782631 | 3.549237866 | 2.606910964 | 0.918833753 | NA |
| ASV_16s_4747 | 0.922115636 | 0.204858503  | 3.54911419  | 2.677054118 | 0.913185482 | NA |
| ASV_16s_4748 | 0.957123872 | -7.05E-04    | 3.54812854  | 2.718416829 | 0.909772646 | NA |
| ASV_16s_4749 | 0.914957899 | -0.77163653  | 3.547918387 | 1.807974566 | NA          | NA |
| ASV_16s_4750 | 1.078459965 | -0.793712502 | 3.548458466 | 2.375473292 | 0.936178615 | NA |
| ASV_16s_4751 | 1.176854602 | 1.412307271  | 2.659951061 | 3.140745099 | 0.871683981 | NA |
| ASV_16s_4752 | 1.163939378 | 0.166121746  | 3.54884635  | 3.164397703 | 0.869388962 | NA |
| ASV_16s_4753 | 1.703272239 | 0.271442955  | 3.549257877 | 1.366064047 | NA          | NA |
| ASV_16s_4754 | 0.889853082 | 0.968913127  | 3.547297384 | 2.432412926 | 0.932099874 | NA |
| ASV_16s_4755 | 1.011220948 | -0.996104781 | 3.547693618 | 1.582785955 | NA          | NA |
| ASV_16s_4756 | 1.237498472 | 0.585126223  | 3.545876425 | 2.132638452 | NA          | NA |
| ASV_16s_4757 | 1.301814536 | 1.121777683  | 3.549185374 | 1.788174362 | 0.970629379 | NA |
| ASV_16s_4758 | 1.083565731 | -0.681364447 | 3.548382545 | 1.761363821 | 0.971861329 | NA |
| ASV_16s_4759 | 1.207034996 | 0.356383613  | 3.549993425 | 2.244167879 | 0.945100066 | NA |
| ASV_16s_4760 | 1.229205335 | 0.693972421  | 3.550612694 | 1.797295642 | 0.97020341  | NA |
| ASV_16s_4761 | 1.153811581 | 0.693963763  | 3.550616642 | 1.765050201 | 0.971693719 | NA |
| ASV_16s_4762 | 1.182434681 | 0.693968749  | 3.550615084 | 1.777528551 | 0.971122149 | NA |
| ASV_16s_4763 | 0.857752069 | -0.181752663 | 3.54927891  | 2.549897996 | NA          | NA |
| ASV_16s_4764 | 0.889169526 | -0.211291449 | 3.549256698 | 2.58770331  | 0.920349415 | NA |
| ASV_16s_4765 | 0.604164016 | 0.596350426  | 3.550595389 | 1.267627234 | NA          | NA |
| ASV_16s_4766 | 0.925243961 | 0.081585378  | 3.548227693 | 2.969602617 | 0.88779992  | NA |
| ASV_16s_4767 | 0.900862791 | -0.157918381 | 3.54871749  | 2.195542418 | NA          | NA |
| ASV_16s_4768 | 0.911093763 | 0.761685832  | 3.548033668 | 2.818074153 | NA          | NA |
| ASV_16s_4769 | 0.90683074  | 1.406889562  | 3.547533785 | 2.472870876 | NA          | NA |
| ASV_16s_4770 | 0.994737431 | -0.101685808 | 3.54944818  | 2.184409407 | 0.948932457 | NA |
| ASV_16s_4771 | 0.819927618 | 0.636843755  | 3.363705376 | 2.117671016 | 0.953041259 | NA |
| ASV_16s_4772 | 1.298683397 | -1.095203343 | 3.547180861 | 2.028275034 | NA          | NA |
| ASV_16s_4773 | 1.861596561 | -2.833169555 | 3.545263369 | 0.645081649 | NA          | NA |
| ASV_16s_4774 | 0.721422315 | 0.69867152   | 3.550600005 | 1.57348045  | NA          | NA |
| ASV_16s_4775 | 0.258048464 | -0.588727103 | 3.550915867 | 0.765040109 | NA          | NA |

|              |             |              |             |             |             |    |
|--------------|-------------|--------------|-------------|-------------|-------------|----|
| ASV_16s_4776 | 1.428707091 | 0.892895179  | 3.549396203 | 3.398467606 | 0.845859776 | NA |
| ASV_16s_4777 | 1.255451834 | 1.143839824  | 3.550127732 | 1.500654111 | 0.982287006 | NA |
| ASV_16s_4778 | 0.886455113 | -0.306726707 | 3.549240546 | 2.535425    | 0.924405987 | NA |
| ASV_16s_4779 | 0.910617808 | 0.034176045  | 3.549157232 | 2.604387383 | 0.919033655 | NA |
| ASV_16s_4780 | 0.892978684 | -0.010030115 | 3.548644074 | 2.607498655 | 0.918787167 | NA |
| ASV_16s_4781 | 1.026641068 | -0.293867368 | 3.547918005 | 2.32561705  | 0.939646297 | NA |
| ASV_16s_4782 | 1.123897467 | -0.796093642 | 3.548111309 | 1.967735158 | 0.961604527 | NA |
| ASV_16s_4783 | 1.01194404  | 0.344017294  | 3.317561821 | 2.436068521 | 0.931833742 | NA |
| ASV_16s_4784 | 0.910575359 | 0.790565773  | 3.548000895 | 2.612827288 | 0.918364193 | NA |
| ASV_16s_4785 | 0.915515204 | 1.109273651  | 3.547684851 | 2.508326416 | NA          | NA |
| ASV_16s_4786 | 1.171191661 | -0.838971337 | 3.282816492 | 2.30428474  | 0.941100165 | NA |
| ASV_16s_4787 | 1.113526226 | -0.794967623 | 3.5482079   | 2.365458933 | 0.93688296  | NA |
| ASV_16s_4788 | 1.09749569  | -1.337841435 | 3.127398816 | 2.680684856 | 0.912888326 | NA |
| ASV_16s_4789 | 1.068806226 | -0.793954757 | 3.548410942 | 2.364662849 | 0.936938784 | NA |
| ASV_16s_4790 | 1.100602697 | -0.922801449 | 3.547540841 | 1.899547476 | 0.965190247 | NA |
| ASV_16s_4791 | 1.128329863 | 0.156676622  | 3.548482357 | 3.043209505 | 0.88097642  | NA |
| ASV_16s_4792 | 1.095633005 | -0.793506063 | 3.548499176 | 2.389618226 | 0.935177096 | NA |
| ASV_16s_4793 | 1.113766687 | -1.103586025 | 3.545600151 | 1.712972365 | NA          | NA |
| ASV_16s_4794 | 0.769834442 | 0.119483906  | 3.548857536 | 2.290735638 | 0.942014225 | NA |
| ASV_16s_4795 | 1.23293847  | 0.403666024  | 3.549418701 | 1.264685428 | NA          | NA |
| ASV_16s_4796 | 0.846969399 | 0.744258319  | 3.549973194 | 1.500151674 | NA          | NA |
| ASV_16s_4797 | 1.808244964 | -3.01430594  | 3.545180359 | 0.613029261 | NA          | NA |
| ASV_16s_4798 | 1.263755412 | 0.193816092  | 3.549016239 | 4.006977998 | NA          | NA |
| ASV_16s_4799 | 0.592448888 | 0.219968703  | 3.550625321 | 1.327219812 | 0.987696929 | NA |
| ASV_16s_4800 | 0.604245342 | 0.219968028  | 3.550624365 | 1.337243593 | 0.987416379 | NA |
| ASV_16s_4801 | 0.730627084 | -1.408167324 | 3.549225704 | 1.589727738 | 0.979039735 | NA |
| ASV_16s_4802 | 1.312121611 | 1.831759999  | 3.547073878 | 2.564289098 | NA          | NA |
| ASV_16s_4803 | 0.874905572 | 1.26888445   | 3.547451428 | 1.200634456 | NA          | NA |
| ASV_16s_4804 | 1.485319041 | 1.468948471  | 3.54877522  | 3.353208751 | 0.850520104 | NA |
| ASV_16s_4805 | 1.100882057 | 0.315939089  | 3.55065254  | 1.806709705 | 0.969760124 | NA |
| ASV_16s_4806 | 1.249200391 | 0.958800526  | 3.550507386 | 1.626987726 | 0.977585042 | NA |
| ASV_16s_4807 | 0.859687193 | -0.169132457 | 3.549281493 | 2.548529258 | NA          | NA |
| ASV_16s_4808 | 0.855858215 | -0.300649111 | 3.549256135 | 2.506556029 | NA          | NA |
| ASV_16s_4809 | 0.898999022 | 0.027981349  | 3.548497325 | 2.730283445 | 0.908782458 | NA |
| ASV_16s_4810 | 0.864236096 | 0.010758967  | 3.548434385 | 2.700204786 | NA          | NA |
| ASV_16s_4811 | 0.912515274 | -0.317200272 | 3.549338924 | 1.471296287 | NA          | NA |
| ASV_16s_4812 | 1.148239167 | -0.795379505 | 3.548120018 | 2.355044406 | 0.937611296 | NA |
| ASV_16s_4813 | 1.094592769 | -0.795487342 | 3.548218372 | 2.34945826  | 0.938000212 | NA |
| ASV_16s_4814 | 1.046318758 | -0.827367252 | 3.069300931 | 2.69847271  | 0.911425754 | NA |
| ASV_16s_4815 | 0.952928624 | -0.702193051 | 3.54815629  | 1.781054922 | NA          | NA |
| ASV_16s_4816 | 1.155778258 | 1.630803857  | 2.50182693  | 4.175220525 | 0.759388781 | NA |
| ASV_16s_4817 | 1.17674799  | 0.355442258  | 3.550578301 | 3.318080451 | 0.854101858 | NA |
| ASV_16s_4818 | 2.065523774 | 1.253903192  | 3.549222667 | 1.390167747 | NA          | NA |
| ASV_16s_4819 | 0.958653307 | 0.317719398  | 3.549053117 | 2.955499774 | 0.88908811  | NA |
| ASV_16s_4820 | 1.160527972 | 0.348818704  | 3.55052579  | 1.272614777 | 0.989157749 | NA |
| ASV_16s_4821 | 1.512811349 | 0.768294272  | 3.549318438 | 3.233148695 | NA          | NA |
| ASV_16s_4822 | 1.288939254 | 1.076795675  | 3.549433993 | 1.891954761 | 0.965577515 | NA |
| ASV_16s_4823 | 0.300433612 | -0.68031469  | 3.550213162 | 0.826671949 | NA          | NA |
| ASV_16s_4824 | 0.268131839 | -0.170156666 | 3.550605526 | 0.950893431 | NA          | NA |
| ASV_16s_4825 | 0.883862715 | 0.020186944  | 3.548108957 | 2.982665714 | 0.886601149 | NA |
| ASV_16s_4826 | 0.944967341 | 1.191201031  | 3.547251301 | 2.56923117  | 0.921794296 | NA |
| ASV_16s_4827 | 0.912643042 | -0.24989546  | 3.547695282 | 2.38873976  | NA          | NA |
| ASV_16s_4828 | 0.974424225 | -0.547697153 | 3.547219987 | 2.212727834 | 0.947134318 | NA |
| ASV_16s_4829 | 1.026118144 | -0.911435053 | 2.726850524 | 3.454411957 | 0.84003027  | NA |
| ASV_16s_4830 | 0.869061578 | -1.400468406 | 3.545490322 | 1.314658025 | NA          | NA |
| ASV_16s_4831 | 0.91233396  | -2.331793776 | 3.169530728 | 0.881969492 | 0.996514693 | NA |
| ASV_16s_4832 | 0.974970138 | -0.075142231 | 3.549876571 | 1.453538514 | NA          | NA |
| ASV_16s_4833 | 1.178377321 | -0.043499699 | 3.54718867  | 2.913033011 | 0.892929103 | NA |
| ASV_16s_4834 | 0.634574784 | 0.305247208  | 3.550391242 | 1.266689396 | 0.989309471 | NA |
| ASV_16s_4835 | 0.632537218 | -0.601638461 | 3.550076317 | 1.308853476 | 0.988200958 | NA |
| ASV_16s_4836 | 2.05545399  | 1.253897231  | 3.549224398 | 1.388602877 | NA          | NA |
| ASV_16s_4837 | 0.505276916 | 0.311322726  | 3.550608616 | 1.012727017 | NA          | NA |
| ASV_16s_4838 | 1.249378363 | -0.19942771  | 3.550081985 | 2.588657608 | 0.92027443  | NA |
| ASV_16s_4839 | 1.183626069 | 0.988157803  | 3.549443173 | 1.500899384 | 0.982278507 | NA |
| ASV_16s_4840 | 1.159784413 | 0.121787712  | 3.273717112 | 2.307411077 | 0.94088822  | NA |
| ASV_16s_4841 | 1.248438101 | 0.272787268  | 3.549745752 | 2.847929792 | NA          | NA |
| ASV_16s_4842 | 1.329462609 | 0.429340017  | 3.54834666  | 3.225848113 | 0.863353103 | NA |

|              |             |              |             |             |             |    |
|--------------|-------------|--------------|-------------|-------------|-------------|----|
| ASV_16s_4843 | 1.176359169 | 0.693967829  | 3.550615409 | 1.77489589  | 0.971243279 | NA |
| ASV_16s_4844 | 1.038277527 | -0.394872154 | 3.549170361 | 2.564625745 | 0.922152575 | NA |
| ASV_16s_4845 | 0.298975196 | -0.680282894 | 3.550220301 | 0.825109557 | NA          | NA |
| ASV_16s_4846 | 0.916858497 | -0.397204595 | 3.548951543 | 2.281122047 | 0.942658361 | NA |
| ASV_16s_4847 | 0.875707526 | 1.132724417  | 3.548337286 | 2.579960908 | NA          | NA |
| ASV_16s_4848 | 0.891182214 | 0.900039933  | 3.547793412 | 2.759441581 | NA          | NA |
| ASV_16s_4849 | 1.171976707 | 0.19311165   | 3.548029343 | 3.595697906 | 0.824987781 | NA |
| ASV_16s_4850 | 1.333228286 | -2.013079823 | 3.546292321 | 2.772311185 | NA          | NA |
| ASV_16s_4851 | 0.918486647 | -1.244719772 | 3.548301522 | 2.052827825 | NA          | NA |
| ASV_16s_4852 | 0.997351825 | -0.076156803 | 3.549905874 | 1.629570951 | 0.977482068 | NA |
| ASV_16s_4853 | 0.922267395 | -0.412950812 | 3.546933482 | 1.831006698 | NA          | NA |
| ASV_16s_4854 | 1.406156248 | 0.810490828  | 3.544751923 | 2.063023279 | 0.956269896 | NA |
| ASV_16s_4855 | 1.200185214 | 2.758652576  | 3.547357021 | 1.224908543 | NA          | NA |
| ASV_16s_4856 | 0.692652334 | 1.260761811  | 3.549542218 | 1.666054256 | NA          | NA |
| ASV_16s_4857 | 0.753620251 | 0.455731583  | 3.549952758 | 1.795534584 | NA          | NA |
| ASV_16s_4858 | 1.186048769 | 0.550634155  | 3.419922726 | 3.407024967 | 0.844972956 | NA |
| ASV_16s_4859 | 0.854823545 | -0.351548271 | 3.549249293 | 2.445832274 | NA          | NA |
| ASV_16s_4860 | 0.833206788 | -0.462556724 | 3.549258113 | 2.19327094  | NA          | NA |
| ASV_16s_4861 | 0.376300369 | 0.099513329  | 3.550619674 | 1.944788522 | 0.962832837 | NA |
| ASV_16s_4862 | 0.859206195 | 0.562218112  | 3.548641814 | 2.598630511 | NA          | NA |
| ASV_16s_4863 | 0.950309827 | 0.199047695  | 3.548704414 | 2.101040825 | 0.954036778 | NA |
| ASV_16s_4864 | 1.019966198 | 0.133203613  | 3.54814946  | 3.315538535 | 0.854359814 | NA |
| ASV_16s_4865 | 0.806251537 | 0.646741768  | 3.548212376 | 2.54483463  | NA          | NA |
| ASV_16s_4866 | 0.963465304 | -0.015561411 | 3.548062417 | 3.075000336 | NA          | NA |
| ASV_16s_4867 | 1.069739019 | -0.795830878 | 3.548103568 | 2.078184807 | 0.955386453 | NA |
| ASV_16s_4868 | 1.059117262 | 0.14391915   | 3.3057537   | 3.026582867 | 0.882532252 | NA |
| ASV_16s_4869 | 1.066340569 | -0.795055499 | 3.548196741 | 2.304419276 | 0.941091052 | NA |
| ASV_16s_4870 | 1.071664858 | -0.79465599  | 3.548269571 | 2.342925321 | 0.938453492 | NA |
| ASV_16s_4871 | 1.102147979 | -0.925155992 | 3.547946841 | 1.54644103  | NA          | NA |
| ASV_16s_4872 | 1.189505898 | 0.110924492  | 3.550435577 | 1.943462714 | 0.962903136 | NA |
| ASV_16s_4873 | 1.394635274 | 2.321467439  | 3.54654727  | 1.768030747 | 0.971557786 | NA |
| ASV_16s_4874 | 0.985356187 | 1.341140527  | 3.549382083 | 1.167058891 | NA          | NA |
| ASV_16s_4875 | 0.650484646 | -0.18800839  | 3.55026985  | 1.268197015 | 0.989270993 | NA |
| ASV_16s_4876 | 0.80173566  | 0.447787932  | 3.549278301 | 2.941088519 | 0.890397995 | NA |
| ASV_16s_4877 | 1.243202536 | 1.095896788  | 3.547005397 | 1.992804282 | 0.96023756  | NA |
| ASV_16s_4878 | 1.244303636 | 1.153636856  | 3.550088128 | 1.485747699 | 0.982798975 | NA |
| ASV_16s_4879 | 0.296058365 | -0.680218393 | 3.550234788 | 0.821963507 | NA          | NA |
| ASV_16s_4880 | 0.278604578 | 0.22001069   | 3.550680434 | 0.944460603 | NA          | NA |
| ASV_16s_4881 | 0.890185736 | 0.189809322  | 3.548600073 | 2.789727598 | 0.903749019 | NA |
| ASV_16s_4882 | 0.889807073 | 0.081349972  | 3.548475578 | 2.797653673 | 0.903068751 | NA |
| ASV_16s_4883 | 0.969689774 | 0.440052652  | 3.547389556 | 2.88323432  | 0.895589752 | NA |
| ASV_16s_4884 | 1.041418929 | 2.227423494  | 3.547391472 | 0.763625378 | 0.997797692 | NA |
| ASV_16s_4885 | 1.060268324 | -2.277986406 | 2.918626237 | 2.005247121 | 0.959549381 | NA |
| ASV_16s_4886 | 1.083924698 | -0.804014348 | 3.269592391 | 2.087240434 | 0.954854277 | NA |
| ASV_16s_4887 | 0.944350747 | 0.492136381  | 3.547022506 | 2.680276569 | NA          | NA |
| ASV_16s_4888 | 0.702325805 | 0.652886518  | 3.549721733 | 1.774143421 | 0.971277847 | NA |
| ASV_16s_4889 | 1.033108184 | 0.700847837  | 3.550200228 | 0.616756002 | 0.998896829 | NA |
| ASV_16s_4890 | 0.912240982 | 0.372585904  | 3.549607926 | 3.077280281 | 0.877762285 | NA |
| ASV_16s_4891 | 1.270711905 | 0.735324656  | 3.550660313 | 1.854985181 | NA          | NA |
| ASV_16s_4892 | 1.173121784 | 0.69396382   | 3.550615583 | 1.773492855 | 0.971307715 | NA |
| ASV_16s_4893 | 0.872166909 | -0.414357689 | 3.549237012 | 2.353864384 | 0.937693553 | NA |
| ASV_16s_4894 | 0.534167847 | 0.219972898  | 3.550630665 | 1.274573716 | NA          | NA |
| ASV_16s_4895 | 0.837145352 | -0.187109235 | 3.548283627 | 2.272021108 | NA          | NA |
| ASV_16s_4896 | 0.916990736 | 0.475067532  | 3.547376739 | 2.705715196 | 0.910827059 | NA |
| ASV_16s_4897 | 1.11249053  | -0.79527289  | 3.548148737 | 2.331143019 | 0.939266755 | NA |
| ASV_16s_4898 | 1.265290371 | -2.023766722 | 3.545622482 | 2.350675363 | NA          | NA |
| ASV_16s_4899 | 1.178756063 | -0.235628092 | 3.313553814 | 2.793232734 | 0.903448448 | NA |
| ASV_16s_4900 | 0.903320335 | -0.086709059 | 3.549592171 | 2.220880623 | 0.946610633 | NA |
| ASV_16s_4901 | 0.57991089  | 0.115498195  | 3.550599656 | 1.322576226 | 0.987825585 | NA |
| ASV_16s_4902 | 0.873531086 | 0.507705999  | 3.548877068 | 2.557316466 | 0.922719593 | NA |
| ASV_16s_4903 | 1.173620985 | 1.334396774  | 3.548997759 | 2.536467053 | NA          | NA |
| ASV_16s_4904 | 0.107940253 | 0.170499463  | 3.550085167 | 1.138161004 | NA          | NA |
| ASV_16s_4905 | 0.868671206 | -0.478826549 | 3.549512434 | 1.926384017 | 0.963802156 | NA |
| ASV_16s_4906 | 1.336975027 | 1.986394682  | 2.41642452  | 4.222964896 | 0.753767921 | NA |
| ASV_16s_4907 | 0.76345998  | 0.893559856  | 2.948359658 | 3.082635121 | 0.877253982 | NA |
| ASV_16s_4908 | 1.206519882 | 1.355953153  | 3.548601928 | 2.287225001 | 0.942249873 | NA |
| ASV_16s_4909 | 2.015631896 | 1.253874241  | 3.549231496 | 1.382266635 | NA          | NA |



|              |             |              |             |             |             |    |
|--------------|-------------|--------------|-------------|-------------|-------------|----|
| ASV_16s_4910 | 0.408044313 | 0.300955738  | 3.550887813 | 0.941420635 | NA          | NA |
| ASV_16s_4911 | 1.190424811 | 0.35496271   | 3.55033577  | 1.504784943 | 0.982143543 | NA |
| ASV_16s_4912 | 1.264452241 | 0.735323292  | 3.550660734 | 1.852466979 | NA          | NA |
| ASV_16s_4913 | 0.896614857 | -0.34471928  | 3.549230354 | 2.502347596 | 0.926920185 | NA |
| ASV_16s_4914 | 0.866606661 | 0.119314133  | 3.548472574 | 2.855661812 | 0.898025857 | NA |
| ASV_16s_4915 | 0.834089292 | 0.065089508  | 3.548402763 | 2.762599463 | NA          | NA |
| ASV_16s_4916 | 0.864103144 | 0.456159942  | 3.54864665  | 2.534730306 | NA          | NA |
| ASV_16s_4917 | 0.902701806 | 0.257465151  | 3.548175763 | 3.167667347 | 0.86907046  | NA |
| ASV_16s_4918 | 1.073180825 | -0.795063669 | 3.548191292 | 2.309742815 | 0.940729892 | NA |
| ASV_16s_4919 | 0.975594171 | -1.150154495 | 3.547792791 | 1.86760222  | 0.966803375 | NA |
| ASV_16s_4920 | 0.95169997  | 1.59955282   | 3.546094629 | 1.216991226 | 0.990530402 | NA |
| ASV_16s_4921 | 1.086431882 | -0.843939608 | 3.548702723 | 2.457459218 | 0.930266217 | NA |
| ASV_16s_4922 | 0.571817387 | 0.219970018  | 3.550627089 | 1.309184237 | 0.988191995 | NA |
| ASV_16s_4923 | 2.00565352  | 1.253867555  | 3.549233315 | 1.380662838 | NA          | NA |
| ASV_16s_4924 | 1.134557468 | 0.823237079  | 3.549729651 | 1.216249639 | 0.990547928 | NA |
| ASV_16s_4925 | 1.126990009 | 0.264405496  | 3.54942193  | 3.794302707 | NA          | NA |
| ASV_16s_4926 | 0.823158162 | -0.257229143 | 3.549280825 | 2.498782168 | NA          | NA |
| ASV_16s_4927 | 0.291683118 | -0.680119301 | 3.550257055 | 0.817187519 | NA          | NA |
| ASV_16s_4928 | 0.291683118 | -0.680119301 | 3.550257055 | 0.817187519 | NA          | NA |
| ASV_16s_4929 | 0.876251549 | -0.017894975 | 3.548295527 | 2.742819454 | 0.907731097 | NA |
| ASV_16s_4930 | 0.930913837 | -3.00E-04    | 3.547144485 | 2.607727199 | NA          | NA |
| ASV_16s_4931 | 1.034712683 | -0.794637808 | 3.548278169 | 2.305525795 | 0.941016076 | NA |
| ASV_16s_4932 | 1.041937734 | -0.794594105 | 3.548285033 | 2.315970841 | 0.940305946 | NA |
| ASV_16s_4933 | 1.103759519 | -0.889822768 | 3.548012566 | 2.053848798 | 0.956799876 | NA |
| ASV_16s_4934 | 1.016052713 | -0.950474615 | 2.924115131 | 2.696790093 | 0.911564582 | NA |
| ASV_16s_4935 | 0.910572921 | -0.830551819 | 3.548879226 | 2.091641585 | 0.954594415 | NA |
| ASV_16s_4936 | 1.627347723 | 0.360456419  | 3.550656087 | 2.04490778  | NA          | NA |
| ASV_16s_4937 | 0.600769866 | 0.219968282  | 3.550624644 | 1.334292329 | NA          | NA |
| ASV_16s_4938 | 0.98110793  | 1.821258113  | 3.547178221 | 1.853372976 | 0.967508178 | NA |
| ASV_16s_4939 | 1.064176732 | 0.120743091  | 3.548313027 | 3.351956159 | 0.850648359 | NA |
| ASV_16s_4940 | 0.307964104 | -0.603866581 | 3.550713747 | 0.898826984 | NA          | NA |
| ASV_16s_4941 | 0.974018489 | 0.343071448  | 3.549384937 | 2.697574823 | 0.911499848 | NA |
| ASV_16s_4942 | 0.878173986 | -0.357895599 | 3.549237396 | 2.462995479 | 0.92985767  | NA |
| ASV_16s_4943 | 1.067459486 | -0.685051257 | 3.549152257 | 1.234912374 | 0.990100707 | NA |
| ASV_16s_4944 | 0.906058261 | -0.445439991 | 3.548981151 | 2.206520225 | 0.947531258 | NA |
| ASV_16s_4945 | 0.851145739 | 0.093035773  | 3.548401197 | 2.810344578 | 0.90197511  | NA |
| ASV_16s_4946 | 0.942572211 | -0.84081297  | 3.548284513 | 1.954999815 | 0.962288945 | NA |
| ASV_16s_4947 | 1.05348907  | 2.247501056  | 3.547372905 | 0.661223531 | 0.998616261 | NA |
| ASV_16s_4948 | 1.054724236 | -0.794935895 | 3.548204849 | 2.294292309 | 0.941774987 | NA |
| ASV_16s_4949 | 0.631752711 | 0.037069686  | 3.54902941  | 1.8810527   | NA          | NA |
| ASV_16s_4950 | 0.718467896 | 0.054685067  | 3.547005981 | 1.136665294 | NA          | NA |
| ASV_16s_4951 | 0.91197025  | 0.209775244  | 3.548904306 | 2.531831981 | 0.924681071 | NA |
| ASV_16s_4952 | 1.613336599 | 0.271446162  | 3.549277546 | 1.348539135 | NA          | NA |
| ASV_16s_4953 | 0.871197483 | 1.142442073  | 3.546721636 | 1.84417116  | 0.967959457 | NA |
| ASV_16s_4954 | 0.945845078 | -0.295485421 | 3.55110178  | 0.811503937 | NA          | NA |
| ASV_16s_4955 | 1.086698997 | 0.290055755  | 3.549416423 | 2.464583665 | 0.929740255 | NA |
| ASV_16s_4956 | 0.259937328 | -0.590074965 | 3.550909134 | 0.767495281 | NA          | NA |
| ASV_16s_4957 | 1.275472051 | 0.612409681  | 2.630474588 | 7.225402734 | 0.405794544 | NA |
| ASV_16s_4958 | 1.382817577 | 0.590534912  | 3.548260303 | 3.563139299 | NA          | NA |
| ASV_16s_4959 | 1.036656931 | 0.351507542  | 3.550653942 | 2.605648105 | 0.918933818 | NA |
| ASV_16s_4960 | 1.044832868 | 0.510867984  | 3.550647254 | 3.290666022 | 0.856875069 | NA |
| ASV_16s_4961 | 0.843746493 | -0.359903865 | 3.549254046 | 2.420615746 | 0.932955222 | NA |
| ASV_16s_4962 | 0.228598602 | -0.170088027 | 3.55062271  | 0.870869313 | NA          | NA |
| ASV_16s_4963 | 0.271742396 | 0.220012726  | 3.55068306  | 0.931842511 | NA          | NA |
| ASV_16s_4964 | 0.870008184 | -0.128803039 | 3.548164058 | 2.591521594 | 0.92004919  | NA |
| ASV_16s_4965 | 0.965693932 | 1.669885196  | 3.547175614 | 2.292204854 | 0.94191546  | NA |
| ASV_16s_4966 | 0.86846512  | -0.001562788 | 3.547695752 | 2.384035259 | 0.935573322 | NA |
| ASV_16s_4967 | 0.961490375 | 1.773554558  | 3.339524372 | 2.403521925 | 0.934185087 | NA |
| ASV_16s_4968 | 1.014777425 | 0.490446731  | 3.547155443 | 2.842422806 | 0.899186662 | NA |
| ASV_16s_4969 | 1.041877036 | -0.794353205 | 3.548332634 | 2.328603255 | 0.939441344 | NA |
| ASV_16s_4970 | 1.021513994 | -0.993162682 | 3.548541435 | 2.243624742 | 0.945135545 | NA |
| ASV_16s_4971 | 0.830998661 | -0.98818907  | 2.972680606 | 2.467361464 | 0.92953466  | NA |
| ASV_16s_4972 | 0.725160131 | -0.926702389 | 3.182946901 | 1.46459487  | 0.983510134 | NA |
| ASV_16s_4973 | 1.061136604 | 1.205873293  | 3.54927566  | 1.17991556  | NA          | NA |
| ASV_16s_4974 | 1.033208997 | -1.019733045 | 3.548437337 | 1.533683363 | NA          | NA |
| ASV_16s_4975 | 0.854409791 | -0.069628164 | 3.549425    | 2.609070596 | NA          | NA |
| ASV_16s_4976 | 0.964518596 | 0.639721806  | 3.170573225 | 1.906012808 | 0.964858583 | NA |

|              |             |              |             |             |             |    |
|--------------|-------------|--------------|-------------|-------------|-------------|----|
| ASV_16s_4977 | 1.316172437 | 0.349349028  | 3.206608893 | 2.523492199 | 0.925317714 | NA |
| ASV_16s_4978 | 1.044631847 | -0.07723692  | 3.550033413 | 1.05928156  | 0.993814729 | NA |
| ASV_16s_4979 | 0.772397296 | 0.287032584  | 3.550616395 | 2.943547389 | NA          | NA |
| ASV_16s_4980 | 1.438128744 | 0.796623529  | 3.186116145 | 3.7706689   | 0.805780507 | NA |
| ASV_16s_4981 | 1.089184534 | 0.416103127  | 3.549384012 | 2.732615241 | 0.90858731  | NA |
| ASV_16s_4982 | 1.230191066 | 1.181348404  | 3.54994378  | 1.443277872 | 0.984208676 | NA |
| ASV_16s_4983 | 1.125485358 | 0.693954121  | 3.550618263 | 1.752361823 | 0.972268245 | NA |
| ASV_16s_4984 | 0.833978954 | -0.282551193 | 3.549270749 | 2.495911278 | NA          | NA |
| ASV_16s_4985 | 0.833147596 | -0.315211749 | 3.549265107 | 2.465632364 | 0.929662671 | NA |
| ASV_16s_4986 | 0.804444091 | -0.332846426 | 3.549277967 | 2.41091159  | NA          | NA |
| ASV_16s_4987 | 0.287307871 | -0.680012912 | 3.550279987 | 0.812342848 | NA          | NA |
| ASV_16s_4988 | 0.287307871 | -0.680012912 | 3.550279987 | 0.812342848 | NA          | NA |
| ASV_16s_4989 | 0.804809151 | -0.684436611 | 3.549289022 | 1.14383057  | NA          | NA |
| ASV_16s_4991 | 0.842084016 | 0.160100756  | 3.548740324 | 2.681518775 | 0.912820009 | NA |
| ASV_16s_4992 | 0.093063035 | -0.25985681  | 3.551549473 | 0.310773281 | 0.999887285 | NA |
| ASV_16s_4993 | 0.858213411 | 0.367060902  | 3.549053962 | 2.583615289 | 0.920670257 | NA |
| ASV_16s_4994 | 0.960581581 | -0.122305439 | 3.548199417 | 3.076012798 | 0.877882476 | NA |
| ASV_16s_4995 | 1.070987499 | -0.794776672 | 3.548245088 | 2.333789292 | 0.939084574 | NA |
| ASV_16s_4996 | 0.925630154 | 0.603134059  | 3.545840289 | 1.551015188 | 0.980490776 | NA |
| ASV_16s_4997 | 1.174885768 | -0.870620953 | 3.548851199 | 1.297753454 | 0.988499323 | NA |
| ASV_16s_4998 | 0.986838916 | 1.761987645  | 3.547157523 | 0.890859715 | NA          | NA |
| ASV_16s_4999 | 0.917587591 | -1.504349708 | 3.548007135 | 1.452099259 | 0.983921808 | NA |
| ASV_16s_5000 | 1.079984536 | -0.21322566  | 3.547055053 | 2.616738566 | 0.918053069 | NA |
| ASV_16s_5001 | 1.365186743 | 0.684897865  | 3.548979287 | 2.780047401 | NA          | NA |
| ASV_16s_5002 | 0.96300759  | -2.334775785 | 3.546885872 | 0.5806102   | NA          | NA |
| ASV_16s_5003 | 1.35579596  | 0.99434557   | 3.549370134 | 2.565302424 | 0.922099982 | NA |
| ASV_16s_5004 | 0.994553063 | -0.684913574 | 3.549183019 | 1.212082681 | 0.990646031 | NA |
| ASV_16s_5005 | 0.864538184 | -0.500353803 | 3.549166691 | 2.307585675 | 0.940876372 | NA |
| ASV_16s_5006 | 0.843558887 | 0.394305812  | 3.548973365 | 2.555046349 | 0.922895296 | NA |
| ASV_16s_5007 | 0.821661698 | 0.659070799  | 3.548422066 | 2.60132425  | NA          | NA |
| ASV_16s_5008 | 0.932297375 | 0.1096951    | 3.548104998 | 3.203411657 | 0.865569007 | NA |
| ASV_16s_5009 | 1.044581509 | -0.793830714 | 3.548441503 | 2.345909226 | 0.938246665 | NA |
| ASV_16s_5010 | 0.903034905 | -1.04281156  | 3.547915635 | 1.848136216 | NA          | NA |
| ASV_16s_5011 | 0.980382998 | -1.46527534  | 3.095549027 | 2.206677986 | 0.94752119  | NA |
| ASV_16s_5012 | 1.166444023 | 0.523284762  | 3.268738251 | 3.31570345  | 0.854343083 | NA |
| ASV_16s_5013 | 1.010375258 | -1.02624649  | 3.373508666 | 0.574697047 | 0.999124416 | NA |
| ASV_16s_5014 | 1.207700593 | 1.060635571  | 3.549200732 | 2.137198701 | 0.951857828 | NA |
| ASV_16s_5015 | 0.984363194 | -2.24088058  | 3.546836989 | 0.815272355 | NA          | NA |
| ASV_16s_5016 | 1.167386122 | 1.011999169  | 3.551393653 | 0.604286445 | NA          | NA |
| ASV_16s_5017 | 1.032358842 | 1.226276166  | 3.327287122 | 1.240640053 | 0.98996087  | NA |
| ASV_16s_5018 | 0.560800123 | 0.219970839  | 3.550628086 | 1.299282415 | 0.988458504 | NA |
| ASV_16s_5019 | 0.574429839 | 0.219969814  | 3.550626858 | 1.311488656 | 0.988129434 | NA |
| ASV_16s_5020 | 1.052141182 | -0.094593996 | 3.549698359 | 1.541320345 | 0.980844574 | NA |
| ASV_16s_5021 | 1.093702404 | -0.44494935  | 3.549255156 | 1.503432373 | 0.982190593 | NA |
| ASV_16s_5022 | 1.142863168 | 0.315939133  | 3.550650143 | 1.825735854 | 0.96885292  | NA |
| ASV_16s_5023 | 0.846876396 | -0.272750186 | 3.549266349 | 2.517766758 | 0.925753279 | NA |
| ASV_16s_5024 | 0.808088973 | -0.277002751 | 3.549285759 | 2.468787766 | NA          | NA |
| ASV_16s_5025 | 0.798974897 | -0.011894011 | 3.549182694 | 2.552062176 | NA          | NA |
| ASV_16s_5026 | 0.843432751 | 0.043635233  | 3.548367493 | 2.763331102 | 0.905999126 | NA |
| ASV_16s_5027 | 0.963506685 | -0.639107911 | 3.548351703 | 2.231762436 | NA          | NA |
| ASV_16s_5028 | 0.840787307 | 0.260718961  | 3.548313683 | 2.962032593 | 0.888492162 | NA |
| ASV_16s_5029 | 0.863645385 | 0.740105005  | 3.548213635 | 2.569669749 | 0.921760136 | NA |
| ASV_16s_5030 | 0.852398493 | 1.179230362  | 3.547951533 | 2.393237285 | NA          | NA |
| ASV_16s_5031 | 0.941814882 | -0.086775578 | 3.548107497 | 3.169494753 | 0.868892318 | NA |
| ASV_16s_5032 | 0.88983285  | 0.063093668  | 3.548099689 | 3.081876662 | 0.87732603  | NA |
| ASV_16s_5033 | 0.949480173 | 0.495947844  | 3.54851238  | 2.873052567 | NA          | NA |
| ASV_16s_5034 | 1.05922533  | -0.795380014 | 3.548150291 | 2.251675488 | 0.94460843  | NA |
| ASV_16s_5035 | 1.019565072 | -0.846822702 | 3.548106822 | 2.009024415 | 0.959339199 | NA |
| ASV_16s_5036 | 1.034043023 | -0.794302732 | 3.548342999 | 2.322887364 | 0.939833338 | NA |
| ASV_16s_5037 | 0.777271063 | 1.280443377  | 3.547290902 | 2.136233525 | 0.951916687 | NA |
| ASV_16s_5038 | 1.068229198 | -0.280755032 | 3.548997529 | 3.321788062 | 0.853725308 | NA |
| ASV_16s_5039 | 1.065349796 | -0.438764869 | 2.868717517 | 4.320294892 | 0.742234592 | NA |
| ASV_16s_5040 | 0.919084487 | 0.338782465  | 3.548206009 | 3.21258447  | 0.864664737 | NA |
| ASV_16s_5041 | 0.915649262 | 0.27053247   | 3.548145207 | 2.782024201 | NA          | NA |
| ASV_16s_5042 | 0.989383018 | -0.111895161 | 3.550046265 | 2.097923727 | 0.954222111 | NA |
| ASV_16s_5043 | 0.813972525 | -0.179159196 | 3.549302651 | 2.497593219 | NA          | NA |
| ASV_16s_5044 | 0.822971349 | -0.250063812 | 3.549282054 | 2.501831456 | 0.926959091 | NA |

|              |             |              |             |             |             |    |
|--------------|-------------|--------------|-------------|-------------|-------------|----|
| ASV_16s_5045 | 0.866667688 | -0.104461129 | 3.548144025 | 2.549882419 | NA          | NA |
| ASV_16s_5046 | 0.847837222 | 0.132149544  | 3.548265554 | 2.921480165 | NA          | NA |
| ASV_16s_5047 | 1.096484453 | -0.796011839 | 3.548121221 | 1.969251966 | 0.961522562 | NA |
| ASV_16s_5048 | 0.933028869 | 0.065100039  | 3.548071833 | 3.126935909 | NA          | NA |
| ASV_16s_5049 | 0.935541024 | -0.342392973 | 3.548647504 | 2.293396915 | 0.941835263 | NA |
| ASV_16s_5050 | 0.765674532 | -0.002293917 | 3.54800931  | 2.080759361 | NA          | NA |
| ASV_16s_5051 | 0.953240357 | -0.14049043  | 3.549380343 | 1.968168496 | NA          | NA |
| ASV_16s_5052 | 0.911455543 | -0.070059334 | 3.549912376 | 1.638103388 | 0.977139986 | NA |
| ASV_16s_5053 | 0.573095554 | 0.581736322  | 3.550550168 | 1.440299625 | 0.984304827 | NA |
| ASV_16s_5054 | 0.892741558 | 0.420663805  | 3.55101535  | 0.652910939 | NA          | NA |
| ASV_16s_5055 | 0.613877734 | 0.596352411  | 3.550594671 | 1.275693754 | NA          | NA |
| ASV_16s_5056 | 1.178685636 | 0.646339371  | 3.550618807 | 2.876088548 | 0.896223492 | NA |
| ASV_16s_5057 | 1.126209596 | 0.356079788  | 3.550326629 | 1.474765403 | 0.983170443 | NA |
| ASV_16s_5058 | 1.114100541 | 0.693951909  | 3.550618938 | 1.747174358 | 0.972501198 | NA |
| ASV_16s_5059 | 1.086416194 | 0.693948697  | 3.550620636 | 1.734353895 | 0.973072111 | NA |
| ASV_16s_5060 | 0.251210898 | -0.170129813 | 3.550612222 | 0.918086194 | NA          | NA |
| ASV_16s_5061 | 0.89478004  | -0.741585059 | 3.548826912 | 2.175144181 | 0.949513719 | NA |
| ASV_16s_5062 | 0.879675352 | 0.01201324   | 3.548502399 | 2.684827882 | 0.912548673 | NA |
| ASV_16s_5063 | 0.843503571 | -0.090642245 | 3.548423182 | 2.481174702 | 0.928507945 | NA |
| ASV_16s_5064 | 0.811730284 | 0.449245605  | 3.54888762  | 2.548889968 | NA          | NA |
| ASV_16s_5065 | 0.891984363 | -0.021631467 | 3.548786444 | 2.087201681 | 0.954856562 | NA |
| ASV_16s_5066 | 0.809729991 | 0.584564265  | 3.548602694 | 2.610673965 | NA          | NA |
| ASV_16s_5067 | 0.752370084 | 0.915531685  | 3.548004331 | 2.281841794 | NA          | NA |
| ASV_16s_5068 | 1.02724569  | -0.795319356 | 3.548155092 | 2.193238875 | 0.948375293 | NA |
| ASV_16s_5069 | 1.076060003 | 2.265929408  | 3.546651872 | 0.48278604  | 0.999507103 | NA |
| ASV_16s_5070 | 1.004627769 | -0.794367195 | 3.548342662 | 2.291940088 | 0.941933264 | NA |
| ASV_16s_5071 | 1.008873036 | -0.435216439 | 3.547718845 | 2.427461964 | 0.932459493 | NA |
| ASV_16s_5072 | 1.105087528 | 1.45168851   | 2.7982314   | 2.524064306 | 0.925274124 | NA |
| ASV_16s_5073 | 0.645642979 | 0.230055961  | 3.550079311 | 0.91269291  | 0.99611672  | NA |
| ASV_16s_5074 | 1.334904645 | 0.271458857  | 3.549355123 | 1.287412041 | NA          | NA |
| ASV_16s_5075 | 0.8212688   | -1.124065245 | 3.54798908  | 1.5190135   | NA          | NA |
| ASV_16s_5076 | 1.044525288 | 1.848073672  | 3.547608763 | 1.413107924 | NA          | NA |
| ASV_16s_5077 | 1.157539863 | 0.343706648  | 3.549494071 | 2.531957028 | 0.924671506 | NA |
| ASV_16s_5078 | 0.918325986 | -1.794418691 | 3.5476217   | 1.550317824 | NA          | NA |
| ASV_16s_5079 | 0.999522835 | -0.794209847 | 3.548375501 | 2.294130585 | 0.941785876 | NA |
| ASV_16s_5080 | 0.969864368 | -0.137574093 | 3.548002162 | 1.982469297 | 0.960804271 | NA |
| ASV_16s_5081 | 0.640667971 | -0.296420777 | 3.549284771 | 1.391526649 | 0.985829382 | NA |
| ASV_16s_5082 | 0.999474046 | 0.143917064  | 3.550586362 | 3.069181809 | 0.87852941  | NA |
| ASV_16s_5083 | 0.540241807 | 0.219972295  | 3.550630055 | 1.280290268 | 0.98895925  | NA |
| ASV_16s_5084 | 0.55570433  | 0.219971219  | 3.550628561 | 1.294632161 | 0.988582378 | NA |
| ASV_16s_5085 | 0.55829249  | 0.219970858  | 3.550628318 | 1.296993769 | 0.988519572 | NA |
| ASV_16s_5086 | 0.869946319 | 0.728914368  | 3.548874743 | 2.699318948 | 0.911355895 | NA |
| ASV_16s_5087 | 1.219805827 | -0.017984906 | 3.548904543 | 2.180789514 | 0.949159969 | NA |
| ASV_16s_5088 | 1.164194741 | 0.181943005  | 3.549536422 | 3.589761753 | 0.825628598 | NA |
| ASV_16s_5089 | 1.195881609 | 0.408522162  | 3.550532791 | 2.397785359 | 0.93459529  | NA |
| ASV_16s_5090 | 1.098405286 | 0.551775178  | 3.550637228 | 3.271341965 | 0.858818066 | NA |
| ASV_16s_5091 | 0.793847541 | -0.321619661 | 3.549285514 | 2.411034914 | NA          | NA |
| ASV_16s_5092 | 0.244048429 | -0.170116191 | 3.550615335 | 0.903563697 | 0.996237899 | NA |
| ASV_16s_5094 | 0.827048467 | 0.008725865  | 3.548951742 | 2.489818518 | 0.927861787 | NA |
| ASV_16s_5095 | 0.92810077  | -0.445635727 | 3.547522766 | 2.269655393 | 0.943421845 | NA |
| ASV_16s_5096 | 0.971423645 | -0.795576859 | 3.548185977 | 1.980065663 | NA          | NA |
| ASV_16s_5097 | 0.82198503  | -0.339671396 | 3.548196198 | 1.96137078  | 0.961947403 | NA |
| ASV_16s_5098 | 0.880244074 | 0.070460918  | 3.548132449 | 3.08942522  | 0.87660822  | NA |
| ASV_16s_5099 | 0.96863556  | -1.390363239 | 3.54815512  | 0.867754531 | NA          | NA |
| ASV_16s_5100 | 0.942571758 | -0.102448508 | 3.549077512 | 2.648647223 | NA          | NA |
| ASV_16s_5101 | 1.040428829 | -0.061293414 | 3.549663245 | 1.646919592 | 0.976783367 | NA |
| ASV_16s_5102 | 0.677072054 | -0.117854435 | 3.548121913 | 1.350394555 | 0.987042421 | NA |
| ASV_16s_5103 | 0.901298462 | 0.34864861   | 3.5491874   | 3.351196354 | 0.850726137 | NA |
| ASV_16s_5104 | 0.367988033 | 0.418920689  | 3.550283751 | 0.805400284 | NA          | NA |
| ASV_16s_5105 | 0.281065122 | 0.418468005  | 3.550699332 | 0.719158779 | NA          | NA |
| ASV_16s_5106 | 0.368130491 | 0.062209404  | 3.549685536 | 1.557465776 | NA          | NA |
| ASV_16s_5107 | 0.948715191 | 1.625575763  | 3.548279255 | 1.914039802 | NA          | NA |
| ASV_16s_5108 | 1.226000538 | 0.344314741  | 3.549629412 | 2.394051238 | 0.93486162  | NA |
| ASV_16s_5109 | 1.07310574  | 0.348502818  | 3.550451385 | 1.476145925 | 0.983124015 | NA |
| ASV_16s_5110 | 1.06252497  | 0.315939189  | 3.5506549   | 1.788595805 | 0.970609774 | NA |
| ASV_16s_5111 | 1.183219135 | 0.315939232  | 3.550647999 | 1.843386625 | 0.967997769 | NA |
| ASV_16s_5112 | 0.787295049 | -0.195600245 | 3.549313408 | 2.467551362 | NA          | NA |

|              |             |              |             |             |             |    |
|--------------|-------------|--------------|-------------|-------------|-------------|----|
| ASV_16s_5113 | 0.277098962 | -0.679303973 | 3.550335349 | 0.800673495 | NA          | NA |
| ASV_16s_5114 | 0.171898004 | -0.169932796 | 3.550661111 | 0.73080103  | NA          | NA |
| ASV_16s_5115 | 0.239170468 | -0.170108195 | 3.550617563 | 0.893432677 | 0.996369471 | NA |
| ASV_16s_5116 | 0.799988658 | 0.088623263  | 3.548922826 | 2.550985193 | 0.923209146 | NA |
| ASV_16s_5117 | 0.841051178 | 0.084027859  | 3.548707915 | 2.63935706  | 0.916243018 | NA |
| ASV_16s_5118 | 0.786052856 | -0.097908669 | 3.548400345 | 2.424687418 | NA          | NA |
| ASV_16s_5119 | 0.894418998 | 0.019158528  | 3.548234599 | 2.726768196 | 0.909076293 | NA |
| ASV_16s_5120 | 0.875985193 | 1.896181878  | 3.546922692 | 2.221268366 | 0.94658566  | NA |
| ASV_16s_5121 | 0.852360843 | -0.09673098  | 3.549567103 | 2.094808171 | NA          | NA |
| ASV_16s_5122 | 0.680390252 | 0.419186893  | 3.549655372 | 1.003346591 | 0.994774371 | NA |
| ASV_16s_5123 | 0.535659928 | 0.219972678  | 3.550630515 | 1.275956318 | 0.989071606 | NA |
| ASV_16s_5124 | 0.884414249 | -0.097926336 | 3.547166912 | 1.793046842 | NA          | NA |
| ASV_16s_5125 | 1.034159473 | 1.952836852  | 3.548189843 | 1.571024402 | 0.979748441 | NA |
| ASV_16s_5126 | 0.926694438 | 2.20468085   | 3.548130027 | 1.327666478 | 0.98768451  | NA |
| ASV_16s_5127 | 1.24374792  | 2.307263903  | 3.547290235 | 2.253121735 | 0.944513463 | NA |
| ASV_16s_5128 | 1.895891387 | 1.253787194  | 3.549254577 | 1.362474081 | NA          | NA |
| ASV_16s_5129 | 1.001162053 | -1.837238751 | 3.547912528 | 0.803592638 | NA          | NA |
| ASV_16s_5130 | 0.589144456 | 0.73498038   | 3.550758403 | 1.463760502 | NA          | NA |
| ASV_16s_5131 | 0.817513995 | -0.216080285 | 3.549291456 | 2.504382425 | 0.926766703 | NA |
| ASV_16s_5132 | 0.787341016 | -0.247036884 | 3.54930237  | 2.459488913 | NA          | NA |
| ASV_16s_5133 | 0.772126546 | -0.684336749 | 3.549312536 | 1.130447946 | NA          | NA |
| ASV_16s_5134 | 0.818893386 | -0.003244483 | 3.54831282  | 2.702338    | 0.911106462 | NA |
| ASV_16s_5135 | 0.916101913 | -1.493451918 | 3.548010745 | 1.243384501 | NA          | NA |
| ASV_16s_5136 | 0.996458236 | -0.794110849 | 3.548387853 | 2.29336468  | 0.941837432 | NA |
| ASV_16s_5137 | 0.966565985 | -0.793812056 | 3.548452676 | 2.27331203  | 0.943178945 | NA |
| ASV_16s_5138 | 0.933810702 | -0.199577756 | 3.549256523 | 1.922252236 | NA          | NA |
| ASV_16s_5139 | 0.723566361 | 0.484813889  | 3.548149754 | 1.780088168 | 0.971004102 | NA |
| ASV_16s_5140 | 0.824130851 | 0.419243009  | 3.549525375 | 1.06523293  | NA          | NA |
| ASV_16s_5141 | 0.893996995 | -1.159023475 | 3.548288821 | 1.994392264 | NA          | NA |
| ASV_16s_5142 | 1.012568049 | 0.175755733  | 3.548433801 | 3.378768973 | NA          | NA |
| ASV_16s_5143 | 1.096215016 | 0.671060176  | 3.548809703 | 2.445221845 | 0.931165122 | NA |
| ASV_16s_5144 | 1.07937268  | 0.315939257  | 3.550653845 | 1.796599908 | 0.970236024 | NA |
| ASV_16s_5145 | 0.586043696 | 0.734977144  | 3.55075937  | 1.461075415 | NA          | NA |
| ASV_16s_5146 | 1.117711325 | 0.69395789   | 3.550618723 | 1.748818611 | 0.972427481 | NA |
| ASV_16s_5147 | 0.217053218 | -0.170062692 | 3.550628909 | 0.845064356 | NA          | NA |
| ASV_16s_5148 | 0.785027583 | -0.307086039 | 3.549274034 | 2.630397919 | NA          | NA |
| ASV_16s_5149 | 0.783042267 | -0.340934977 | 3.548259897 | 1.671094542 | NA          | NA |
| ASV_16s_5150 | 1.060896163 | -0.795930612 | 3.548152528 | 1.932883796 | 0.963461442 | NA |
| ASV_16s_5151 | 0.822563297 | 0.677803126  | 3.548269184 | 2.707082579 | NA          | NA |
| ASV_16s_5152 | 1.012286592 | -0.795185742 | 3.5481828   | 2.206304847 | 0.947545003 | NA |
| ASV_16s_5153 | 1.002921818 | -0.794673463 | 3.548280884 | 2.2684368   | 0.943502674 | NA |
| ASV_16s_5154 | 0.98810562  | -0.794597017 | 3.548300563 | 2.258400502 | 0.944166126 | NA |
| ASV_16s_5155 | 0.985963186 | -0.794371305 | 3.548338645 | 2.269724984 | 0.943417227 | NA |
| ASV_16s_5156 | 0.975518844 | -0.794265303 | 3.548360508 | 2.264110799 | 0.943789139 | NA |
| ASV_16s_5157 | 0.912950641 | -1.104817349 | 3.548052734 | 1.868150029 | NA          | NA |
| ASV_16s_5158 | 0.795608812 | -1.364256661 | 3.546777519 | 1.65530653  | 0.976441128 | NA |
| ASV_16s_5159 | 0.861586484 | -0.069752851 | 3.550104646 | 1.619064429 | 0.977899168 | NA |
| ASV_16s_5160 | 1.079159474 | -0.363381095 | 3.285225224 | 3.100529955 | 0.8755492   | NA |
| ASV_16s_5161 | 0.752232646 | 0.686934926  | 3.548373838 | 2.437235173 | NA          | NA |
| ASV_16s_5162 | 0.964824499 | 0.214581673  | 3.547338139 | 2.746367688 | 0.907432527 | NA |
| ASV_16s_5163 | 0.977973855 | -1.491025725 | 3.546715914 | 1.653130791 | NA          | NA |
| ASV_16s_5164 | 0.582538582 | 0.394212299  | 3.550745011 | 0.940590297 | NA          | NA |
| ASV_16s_5165 | 1.875934636 | 1.25377285   | 3.54925871  | 1.359054285 | NA          | NA |
| ASV_16s_5166 | 1.087082471 | 0.379100315  | 3.550450102 | 0.886559482 | 0.996457007 | NA |
| ASV_16s_5167 | 1.203021629 | 0.082139073  | 3.549546137 | 3.030868257 | 0.88213205  | NA |
| ASV_16s_5168 | 1.009837102 | 0.315939172  | 3.55065843  | 1.762690048 | 0.971801094 | NA |
| ASV_16s_5169 | 1.003497188 | 0.383957041  | 3.550654308 | 2.912376202 | 0.892988057 | NA |
| ASV_16s_5170 | 0.582942935 | 0.734973861  | 3.550760346 | 1.458376126 | NA          | NA |
| ASV_16s_5171 | 1.039954013 | 0.693937573  | 3.550623691 | 1.712084062 | 0.97404754  | NA |
| ASV_16s_5172 | 0.783313067 | -0.306313764 | 3.549294061 | 2.413828091 | NA          | NA |
| ASV_16s_5173 | 0.815296804 | -0.332315102 | 3.549272094 | 2.424668573 | 0.932661978 | NA |
| ASV_16s_5174 | 0.775790776 | -0.356337226 | 3.549292003 | 2.343413135 | NA          | NA |
| ASV_16s_5175 | 0.276730402 | 0.001292075  | 3.550614383 | 1.861837192 | NA          | NA |
| ASV_16s_5176 | 0.805276011 | 0.025838624  | 3.548971241 | 2.483412824 | 0.928340908 | NA |
| ASV_16s_5177 | 0.840427714 | 0.069326508  | 3.548439575 | 2.732390683 | 0.908606111 | NA |
| ASV_16s_5178 | 1.014288296 | -0.795064647 | 3.548212491 | 2.241753416 | 0.945257697 | NA |
| ASV_16s_5179 | 0.970000355 | -0.794052317 | 3.548403481 | 2.268377769 | 0.943506588 | NA |

|              |             |              |             |             |             |    |
|--------------|-------------|--------------|-------------|-------------|-------------|----|
| ASV_16s_5180 | 0.861538455 | -0.718637681 | 3.548171752 | 1.72833558  | 0.973337753 | NA |
| ASV_16s_5181 | 0.982371373 | -0.794053057 | 3.548401705 | 2.281229572 | 0.942651177 | NA |
| ASV_16s_5182 | 0.838885586 | -0.084474743 | 3.549633575 | 2.16484777  | 0.950155584 | NA |
| ASV_16s_5183 | 0.87374376  | -0.083612316 | 3.549657128 | 1.883697501 | NA          | NA |
| ASV_16s_5184 | 1.070034769 | 0.689994414  | 3.550622056 | 1.737467255 | 0.972934099 | NA |
| ASV_16s_5185 | 0.436158003 | -0.051729201 | 3.550933867 | 0.799166146 | NA          | NA |
| ASV_16s_5186 | 0.481494931 | 0.720505078  | 3.550431283 | 1.692586008 | NA          | NA |
| ASV_16s_5187 | 1.129926678 | 0.065760659  | 3.549669351 | 2.260625933 | 0.944019361 | NA |
| ASV_16s_5188 | 0.889978089 | -0.117808474 | 3.549511335 | 2.385822254 | 0.93544663  | NA |
| ASV_16s_5189 | 0.972290356 | 0.481483964  | 3.550654229 | 3.214593967 | 0.864466328 | NA |
| ASV_16s_5190 | 1.177119707 | 0.693968679  | 3.55061537  | 1.775176673 | 0.971230374 | NA |
| ASV_16s_5191 | 0.770521469 | -0.236410243 | 3.549314277 | 2.441951831 | NA          | NA |
| ASV_16s_5192 | 0.820287844 | -0.263261613 | 3.549281511 | 2.491999223 | 0.927698325 | NA |
| ASV_16s_5193 | 0.805715181 | -0.349006    | 3.549275392 | 2.391082565 | 0.93507297  | NA |
| ASV_16s_5194 | 0.852390214 | -0.3935634   | 3.549247433 | 2.373177633 | 0.936340422 | NA |
| ASV_16s_5195 | 0.813240378 | -0.387713118 | 3.549268344 | 2.338031188 | 0.938791968 | NA |
| ASV_16s_5196 | 0.264153447 | -0.047761249 | 3.550618383 | 1.583222667 | NA          | NA |
| ASV_16s_5197 | 0.315217827 | 0.318174919  | 3.550658863 | 1.637565673 | 0.977161633 | NA |
| ASV_16s_5198 | 0.861891269 | 0.631592037  | 3.548293942 | 2.681977976 | NA          | NA |
| ASV_16s_5199 | 0.817868828 | 0.185059788  | 3.548272504 | 2.914846173 | 0.892766285 | NA |
| ASV_16s_5200 | 0.809147702 | 0.190195478  | 3.548263908 | 2.915860501 | 0.892675154 | NA |
| ASV_16s_5201 | 0.930327581 | 0.746529382  | 3.547580627 | 2.932514125 | 0.891174224 | NA |
| ASV_16s_5202 | 0.967877761 | -0.794934222 | 3.548234673 | 2.183839227 | 0.948968328 | NA |
| ASV_16s_5203 | 0.819813027 | 1.847095578  | 3.54692015  | 2.081083584 | 0.955216467 | NA |
| ASV_16s_5204 | 0.913888032 | -0.220776865 | 3.548049731 | 1.73767919  | 0.972924689 | NA |
| ASV_16s_5205 | 0.693435601 | 2.486875819  | 3.548027103 | 0.537064125 | NA          | NA |
| ASV_16s_5206 | 1.019461055 | 0.042004539  | 3.549452747 | 3.492299513 | 0.836040436 | NA |
| ASV_16s_5207 | 0.873698831 | -0.138773314 | 3.547592608 | 1.355993914 | NA          | NA |
| ASV_16s_5208 | 0.460944948 | 0.370945983  | 3.551675232 | 0.54124495  | NA          | NA |
| ASV_16s_5209 | 0.888580866 | 0.142864034  | 3.54923203  | 2.289149927 | NA          | NA |
| ASV_16s_5210 | 0.587168235 | -0.512363823 | 3.549662429 | 1.7677147   | NA          | NA |
| ASV_16s_5211 | 1.158603145 | 0.793343724  | 3.548365483 | 2.051587583 | NA          | NA |
| ASV_16s_5212 | 1.001779637 | 0.335612239  | 3.550624357 | 1.534270273 | 0.981099451 | NA |
| ASV_16s_5213 | 1.116007803 | 1.187285156  | 3.549642743 | 1.32919535  | 0.987641943 | NA |
| ASV_16s_5214 | 0.798124215 | -0.28461717  | 3.549289695 | 2.450966691 | 0.930743842 | NA |
| ASV_16s_5215 | 0.770809244 | -0.282241532 | 3.54930614  | 2.418470059 | NA          | NA |
| ASV_16s_5216 | 0.145084417 | -0.16981764  | 3.550689688 | 0.650382117 | NA          | NA |
| ASV_16s_5217 | 0.256270128 | -0.17013919  | 3.55061013  | 0.928081556 | NA          | NA |
| ASV_16s_5218 | 0.848251723 | -0.170655282 | 3.548901325 | 2.291111187 | 0.941988987 | NA |
| ASV_16s_5219 | 0.865218053 | 0.051917298  | 3.548287369 | 2.828258887 | 0.900422121 | NA |
| ASV_16s_5220 | 0.353582745 | 1.627125435  | 3.550310058 | 0.648284854 | NA          | NA |
| ASV_16s_5221 | 0.880401683 | -0.082447324 | 3.547691458 | 1.671065313 | 0.975790192 | NA |
| ASV_16s_5222 | 0.938816063 | -0.864334439 | 3.054435526 | 3.064777592 | 0.878945779 | NA |
| ASV_16s_5223 | 1.010857493 | 1.014866804  | 3.547388379 | 2.298347848 | 0.941501581 | NA |
| ASV_16s_5224 | 1.053327177 | -0.127232981 | 3.287032513 | 3.561631961 | 0.828655038 | NA |
| ASV_16s_5225 | 1.00149433  | 0.318247855  | 3.546324187 | 2.07762468  | 0.95541926  | NA |
| ASV_16s_5226 | 1.018760839 | -0.460995562 | 3.549500596 | 1.587438117 | 0.979127264 | NA |
| ASV_16s_5227 | 0.614793367 | -0.086349989 | 3.550663358 | 0.586796583 | 0.999062548 | NA |
| ASV_16s_5228 | 1.059441048 | 0.946065627  | 3.547119979 | 2.440856856 | NA          | NA |
| ASV_16s_5229 | 0.941172714 | 0.320772025  | 3.549764383 | 1.442412215 | 0.984236659 | NA |
| ASV_16s_5230 | 0.942523727 | 1.057362636  | 3.550146445 | 1.899186301 | 0.965208723 | NA |
| ASV_16s_5231 | 0.626444556 | -0.079346729 | 3.550601707 | 1.515188555 | NA          | NA |
| ASV_16s_5232 | 1.169972862 | 0.149704124  | 3.548144416 | 2.417874617 | NA          | NA |
| ASV_16s_5233 | 1.035871056 | 0.363474495  | 3.549728088 | 1.318847761 | 0.987928288 | NA |
| ASV_16s_5234 | 0.966262383 | 1.17873909   | 3.548862536 | 2.284209378 | 0.942451902 | NA |
| ASV_16s_5235 | 0.22245837  | -0.051904159 | 3.550635082 | 1.404162983 | NA          | NA |
| ASV_16s_5236 | 0.771661191 | 0.124704585  | 3.548325534 | 2.799067954 | NA          | NA |
| ASV_16s_5237 | 0.798019969 | 0.131330763  | 3.548428727 | 2.532533586 | 0.924627394 | NA |
| ASV_16s_5238 | 0.827533676 | 1.265531239  | 3.547960079 | 2.488166439 | 0.927985505 | NA |
| ASV_16s_5239 | 0.900170346 | -1.171486059 | 3.548197799 | 1.807558109 | 0.969719993 | NA |
| ASV_16s_5240 | 1.019801231 | -0.886525486 | 3.548331291 | 1.561624165 | 0.980099224 | NA |
| ASV_16s_5241 | 0.908563604 | 1.801187163  | 3.546666152 | 2.0284054   | NA          | NA |
| ASV_16s_5242 | 0.902769835 | -1.047407606 | 3.547635758 | 1.659298792 | NA          | NA |
| ASV_16s_5243 | 0.876453978 | -1.478428319 | 3.547915001 | 1.813944545 | NA          | NA |
| ASV_16s_5244 | 0.813859444 | -0.309832661 | 3.548574286 | 1.667398266 | NA          | NA |
| ASV_16s_5245 | 0.957375312 | 0.393669802  | 3.548189727 | 2.660546199 | 0.914530654 | NA |
| ASV_16s_5246 | 0.86761228  | 0.62054137   | 3.548538559 | 1.780595099 | NA          | NA |

|              |             |              |             |             |             |    |
|--------------|-------------|--------------|-------------|-------------|-------------|----|
| ASV_16s_5247 | 0.859379648 | -0.094090094 | 3.54955485  | 2.114927852 | 0.953206252 | NA |
| ASV_16s_5248 | 0.43573776  | -0.12039286  | 3.549829622 | 1.345071695 | NA          | NA |
| ASV_16s_5249 | 0.618929329 | 0.027437582  | 3.548089527 | 1.742917154 | NA          | NA |
| ASV_16s_5250 | 0.805627027 | 0.663096694  | 3.549750708 | 1.534783557 | 0.981080963 | NA |
| ASV_16s_5251 | 1.193346343 | 0.44375112   | 3.550853685 | 0.650206331 | NA          | NA |
| ASV_16s_5252 | 0.887804664 | -0.33672534  | 3.547050637 | 1.872671939 | NA          | NA |
| ASV_16s_5253 | 0.311810898 | -0.357672821 | 3.550338918 | 0.897748706 | NA          | NA |
| ASV_16s_5254 | 0.380969195 | 0.075503822  | 3.54966933  | 1.59639516  | NA          | NA |
| ASV_16s_5255 | 0.270764306 | 0.417459473  | 3.550757287 | 0.70697349  | NA          | NA |
| ASV_16s_5256 | 0.401362359 | -0.027705228 | 3.549548806 | 1.720014061 | NA          | NA |
| ASV_16s_5257 | 0.524388479 | 0.219973504  | 3.550631679 | 1.265132027 | 0.989349128 | NA |
| ASV_16s_5258 | 0.932266926 | 2.469005235  | 3.548481735 | 0.650999642 | NA          | NA |
| ASV_16s_5259 | 1.836021133 | 1.253744532  | 3.549267244 | 1.352104257 | NA          | NA |
| ASV_16s_5260 | 1.027771107 | 0.315939237  | 3.550657189 | 1.771641731 | 0.971392604 | NA |
| ASV_16s_5261 | 1.069565031 | 1.071394961  | 3.55033092  | 1.475428764 | 0.983148143 | NA |
| ASV_16s_5262 | 0.758863187 | -0.293598611 | 3.549311171 | 2.394099751 | NA          | NA |
| ASV_16s_5263 | 0.803038049 | -0.385005832 | 3.549274183 | 2.330531715 | 0.9393088   | NA |
| ASV_16s_5264 | 0.836695798 | -0.401940465 | 3.549255219 | 2.338773746 | 0.938740674 | NA |
| ASV_16s_5265 | 0.338023018 | 0.270723743  | 3.550615977 | 1.8219159   | NA          | NA |
| ASV_16s_5266 | 0.761449972 | -0.030012634 | 3.548427451 | 2.529163482 | NA          | NA |
| ASV_16s_5267 | 0.758018356 | -0.167512538 | 3.548393572 | 2.204810993 | NA          | NA |
| ASV_16s_5268 | 0.843859548 | 0.39652612   | 3.547687922 | 2.546895155 | 0.92352461  | NA |
| ASV_16s_5269 | 0.825602067 | 0.837238672  | 3.547089339 | 2.119565669 | 0.952927121 | NA |
| ASV_16s_5270 | 0.795287913 | 0.897833941  | 3.547426135 | 2.540062302 | NA          | NA |
| ASV_16s_5271 | 0.936196314 | -0.906748913 | 3.548261675 | 2.014184672 | 0.959051106 | NA |
| ASV_16s_5272 | 0.961591863 | -0.79451302  | 3.548295575 | 2.220444855 | 0.946638692 | NA |
| ASV_16s_5273 | 0.913009607 | 0.162710626  | 3.54826512  | 2.256769205 | 0.944273583 | NA |
| ASV_16s_5274 | 0.813519325 | -1.226334884 | 3.548499393 | 1.966240229 | 0.961685217 | NA |
| ASV_16s_5275 | 0.788240787 | -0.967767137 | 3.548643599 | 2.271519261 | 0.9432981   | NA |
| ASV_16s_5276 | 1.153553086 | 0.006320804  | 3.548685532 | 2.237251768 | 0.945550966 | NA |
| ASV_16s_5277 | 0.881735867 | 2.22565338   | 3.54864487  | 1.376482113 | 0.986280729 | NA |
| ASV_16s_5278 | 1.51222783  | -2.504382691 | 3.545929853 | 0.630575557 | NA          | NA |
| ASV_16s_5279 | 0.915260728 | -1.51746     | 3.548060705 | 0.744650805 | NA          | NA |
| ASV_16s_5280 | 0.687423948 | -0.390059434 | 3.547083022 | 1.805523999 | 0.96981616  | NA |
| ASV_16s_5281 | 0.846793842 | -0.069686412 | 3.549429832 | 2.6177546   | NA          | NA |
| ASV_16s_5282 | 0.369663908 | 0.294275534  | 3.551016797 | 0.907963297 | NA          | NA |
| ASV_16s_5283 | 0.941816214 | -0.10241637  | 3.550184828 | 2.010523574 | 0.959255616 | NA |
| ASV_16s_5284 | 1.107733115 | 0.519144079  | 3.549363314 | 2.862404388 | 0.897432438 | NA |
| ASV_16s_5285 | 0.997573303 | 0.807478069  | 3.549579198 | 2.665601112 | 0.914119777 | NA |
| ASV_16s_5286 | 1.158023207 | 1.151733013  | 3.549949477 | 1.893020718 | NA          | NA |
| ASV_16s_5287 | 0.998676277 | 0.315939189  | 3.550659226 | 1.757007943 | 0.97205865  | NA |
| ASV_16s_5288 | 0.755876282 | -0.354432143 | 3.549304477 | 2.320643419 | NA          | NA |
| ASV_16s_5289 | 0.330237277 | 0.219998321  | 3.550664183 | 1.030469795 | NA          | NA |
| ASV_16s_5290 | 0.814309821 | -0.473301085 | 3.54924026  | 2.262414186 | 0.943901283 | NA |
| ASV_16s_5291 | 0.791616853 | 0.092093933  | 3.548805479 | 2.558799664 | 0.922604694 | NA |
| ASV_16s_5292 | 0.816296234 | 0.488127403  | 3.548134105 | 2.66446453  | 0.914212241 | NA |
| ASV_16s_5293 | 0.927144198 | -0.177896265 | 3.54742005  | 2.779668738 | 0.904609266 | NA |
| ASV_16s_5294 | 0.666166966 | 1.071517371  | 3.547266313 | 1.157587127 | 0.991870885 | NA |
| ASV_16s_5295 | 0.912507675 | 0.352263127  | 3.548716447 | 2.766962433 | 0.905690994 | NA |
| ASV_16s_5296 | 0.917338314 | -0.145507224 | 3.547563325 | 2.780195326 | 0.904564317 | NA |
| ASV_16s_5297 | 0.944383722 | -0.790230015 | 3.54906157  | 2.25112359  | 0.944644648 | NA |
| ASV_16s_5298 | 0.87939288  | -0.109132875 | 3.549526034 | 2.0221369   | 0.958604978 | NA |
| ASV_16s_5299 | 0.895611389 | 3.448450213  | 3.546064212 | 0.26997473  | NA          | NA |
| ASV_16s_5300 | 0.879137761 | -0.065600097 | 3.550174979 | 1.272828395 | NA          | NA |
| ASV_16s_5301 | 0.638642741 | 0.647295614  | 3.547868386 | 1.736056918 | 0.972996668 | NA |
| ASV_16s_5302 | 1.066499171 | 0.426947542  | 3.549992595 | 0.860616822 | NA          | NA |
| ASV_16s_5303 | 0.943261611 | -0.243736233 | 3.548033953 | 1.485787223 | 0.98279763  | NA |
| ASV_16s_5304 | 0.798021841 | -0.069631829 | 3.549485083 | 2.535807531 | 0.924376672 | NA |
| ASV_16s_5305 | 1.047082281 | 0.431513426  | 3.550645843 | 2.295915705 | 0.941665623 | NA |
| ASV_16s_5306 | 1.022713487 | 0.363481594  | 3.549713395 | 1.309188522 | 0.988191879 | NA |
| ASV_16s_5307 | 0.3061064   | 0.348844882  | 3.550659684 | 1.679212967 | NA          | NA |
| ASV_16s_5308 | 0.863671635 | -0.650905281 | 3.548716274 | 2.196219331 | 0.948186505 | NA |
| ASV_16s_5309 | 0.942377906 | -0.325543624 | 3.547973891 | 2.238264139 | NA          | NA |
| ASV_16s_5310 | 0.833004211 | 0.61730031   | 3.548188241 | 2.827979287 | 0.900446442 | NA |
| ASV_16s_5311 | 0.936395592 | -0.793430845 | 3.548535922 | 2.252267293 | 0.94456958  | NA |
| ASV_16s_5312 | 0.854075476 | -0.093991104 | 3.549531839 | 2.073721019 | 0.955647536 | NA |
| ASV_16s_5313 | 0.807553359 | -0.088874732 | 3.549731712 | 2.091897053 | 0.954579306 | NA |

|              |             |              |             |             |             |    |
|--------------|-------------|--------------|-------------|-------------|-------------|----|
| ASV_16s_5314 | 1.17947161  | -1.270831096 | 3.548531461 | 1.563879255 | NA          | NA |
| ASV_16s_5315 | 1.068909911 | 0.768409285  | 3.449804765 | 1.810812584 | 0.96956577  | NA |
| ASV_16s_5316 | 0.937688994 | -0.098284899 | 3.547586287 | 2.131587015 | 0.952199509 | NA |
| ASV_16s_5317 | 1.495866705 | 0.271450948  | 3.549306797 | 1.324106617 | NA          | NA |
| ASV_16s_5318 | 1.135882628 | -1.669031767 | 3.546960669 | 1.022902153 | 0.994450584 | NA |
| ASV_16s_5319 | 1.185160435 | 0.403658778  | 3.549439278 | 1.251877962 | NA          | NA |
| ASV_16s_5320 | 0.568190265 | -0.178768014 | 3.54928347  | 2.014205398 | NA          | NA |
| ASV_16s_5321 | 0.766502167 | -0.069646384 | 3.549590064 | 2.418479016 | 0.933109572 | NA |
| ASV_16s_5322 | 0.52871426  | -0.2645803   | 3.550485524 | 0.697406842 | 0.998355582 | NA |
| ASV_16s_5323 | 0.671048407 | 1.674937016  | 3.549139547 | 1.303614218 | NA          | NA |
| ASV_16s_5324 | 1.015112411 | 0.386034203  | 3.550598602 | 1.802828694 | 0.96994332  | NA |
| ASV_16s_5325 | 1.059569028 | 0.35175174   | 3.549880884 | 2.249057534 | 0.944780124 | NA |
| ASV_16s_5326 | 0.931729915 | 0.416508748  | 3.550658055 | 3.019686336 | 0.883175129 | NA |
| ASV_16s_5327 | 1.070990521 | 0.693947667  | 3.550621622 | 1.727050732 | 0.973394269 | NA |
| ASV_16s_5328 | 0.770772485 | -0.232740421 | 3.549314849 | 2.443227545 | 0.931311072 | NA |
| ASV_16s_5329 | 0.769862957 | -0.415909004 | 3.549293286 | 2.229426495 | 0.946058823 | NA |
| ASV_16s_5330 | 0.262514806 | -0.676769893 | 3.55041863  | 0.783000644 | NA          | NA |
| ASV_16s_5331 | 0.475991151 | 0.219977934  | 3.550637304 | 1.215930615 | NA          | NA |
| ASV_16s_5333 | 0.786369969 | 0.100322046  | 3.549170186 | 2.495168315 | 0.927460456 | NA |
| ASV_16s_5334 | 0.863604783 | -0.67655598  | 3.548909176 | 2.208897462 | 0.947379432 | NA |
| ASV_16s_5335 | 0.768800231 | 0.063871946  | 3.548765428 | 2.546630931 | NA          | NA |
| ASV_16s_5336 | 0.768680185 | 0.024503825  | 3.548306071 | 2.700879207 | NA          | NA |
| ASV_16s_5337 | 0.751359732 | -0.340648454 | 3.548277872 | 1.679043038 | NA          | NA |
| ASV_16s_5338 | 0.972211019 | -1.860590875 | 3.547264378 | 1.471540008 | 0.983278619 | NA |
| ASV_16s_5339 | 0.971881906 | -0.794633532 | 3.548292089 | 2.232916941 | 0.945832599 | NA |
| ASV_16s_5340 | 0.922569917 | -0.793803187 | 3.548468514 | 2.22853383  | 0.9461166   | NA |
| ASV_16s_5341 | 0.845599014 | -0.88900481  | 3.547964919 | 1.777648518 | 0.971116622 | NA |
| ASV_16s_5342 | 0.913489569 | -0.897547973 | 3.54875643  | 2.283489865 | 0.942500052 | NA |
| ASV_16s_5343 | 0.835715368 | 1.933881191  | 3.122542314 | 2.035439318 | 0.957852845 | NA |
| ASV_16s_5344 | 0.919267015 | 0.296852199  | 3.549905116 | 1.790603007 | 0.970516299 | NA |
| ASV_16s_5345 | 0.834710131 | -0.018547575 | 3.548206861 | 1.987632572 | NA          | NA |
| ASV_16s_5346 | 1.017540919 | 0.531725789  | 3.550058231 | 0.970891876 | 0.995284523 | NA |
| ASV_16s_5347 | 0.942227131 | -1.579933085 | 3.547772044 | 1.225018679 | 0.990339393 | NA |
| ASV_16s_5348 | 0.898495729 | 0.597885354  | 3.547433997 | 1.922726121 | NA          | NA |
| ASV_16s_5349 | 1.287462522 | -3.270270516 | 3.545489493 | 0.426567697 | NA          | NA |
| ASV_16s_5350 | 1.023633324 | -0.37022418  | 3.535590006 | 3.55122423  | 0.829770465 | NA |
| ASV_16s_5351 | 1.79610763  | 1.253707646  | 3.549276156 | 1.345000316 | NA          | NA |
| ASV_16s_5352 | 0.721792005 | 1.251520114  | 3.549882368 | 1.050887198 | NA          | NA |
| ASV_16s_5353 | 1.023706577 | 0.634865471  | 3.550385309 | 1.230483571 | 0.990208    | NA |
| ASV_16s_5354 | 0.961683962 | 0.574876015  | 3.550642207 | 3.033490717 | 0.881886869 | NA |
| ASV_16s_5355 | 0.951227645 | 0.315939081  | 3.550662816 | 1.73222078  | 0.973166437 | NA |
| ASV_16s_5356 | 0.769219965 | -0.337699455 | 3.549297934 | 2.360615063 | 0.937222422 | NA |
| ASV_16s_5357 | 0.740604544 | -0.367111791 | 3.549313393 | 2.281443001 | NA          | NA |
| ASV_16s_5358 | 0.261056391 | -0.676301945 | 3.550426594 | 0.781156079 | NA          | NA |
| ASV_16s_5359 | 0.261056391 | -0.676301945 | 3.550426594 | 0.781156079 | NA          | NA |
| ASV_16s_5360 | 0.488674588 | 0.596319242  | 3.550606147 | 1.15978872  | 0.991823475 | NA |
| ASV_16s_5361 | 0.813966939 | 0.059386052  | 3.54870331  | 2.603788445 | 0.919081065 | NA |
| ASV_16s_5362 | 0.801668066 | 0.008818118  | 3.548305803 | 2.74170012  | 0.907825194 | NA |
| ASV_16s_5363 | 0.798078765 | 1.3169213    | 3.548065108 | 2.416642514 | 0.933242094 | NA |
| ASV_16s_5364 | 0.941339011 | -0.795233755 | 3.548212839 | 2.072087145 | 0.955742895 | NA |
| ASV_16s_5365 | 0.998865914 | -0.987335755 | 3.547838546 | 1.867855358 | 0.96679076  | NA |
| ASV_16s_5366 | 0.842098031 | 0.407793843  | 3.548483416 | 2.829193187 | 0.900340832 | NA |
| ASV_16s_5367 | 0.929214318 | -0.794241332 | 3.548377469 | 2.212983221 | 0.947117954 | NA |
| ASV_16s_5368 | 0.869932803 | 0.103257824  | 2.197174655 | 3.201738305 | 0.865733719 | NA |
| ASV_16s_5369 | 0.857840933 | 1.425786153  | 3.547659667 | 1.913037077 | 0.964496269 | NA |
| ASV_16s_5370 | 0.841179002 | -0.922567821 | 3.548913225 | 2.081561526 | NA          | NA |
| ASV_16s_5371 | 0.615248143 | -0.301874118 | 3.550353005 | 0.863929469 | 0.996735485 | NA |
| ASV_16s_5372 | 0.99961059  | 0.372916263  | 3.545259599 | 1.944931715 | NA          | NA |
| ASV_16s_5373 | 0.81891362  | 2.423294162  | 3.548869289 | 0.694119533 | NA          | NA |
| ASV_16s_5374 | 0.717689564 | 0.153523397  | 3.548187545 | 2.466121988 | NA          | NA |
| ASV_16s_5375 | 0.533196769 | 0.223822329  | 3.55066002  | 1.098522901 | 0.993078913 | NA |
| ASV_16s_5376 | 0.754128512 | 0.929045075  | 3.11981654  | 2.135204332 | NA          | NA |
| ASV_16s_5377 | 1.026671516 | 0.314436818  | 3.550656204 | 1.652795311 | 0.976543906 | NA |
| ASV_16s_5378 | 1.001477807 | 0.334884148  | 3.550673877 | 1.263318568 | 0.989395193 | NA |
| ASV_16s_5379 | 1.017832258 | 0.315939094  | 3.550657872 | 1.766669517 | 0.971619913 | NA |
| ASV_16s_5380 | 1.129008542 | 1.187184586  | 3.549666359 | 1.340783756 | 0.98731637  | NA |
| ASV_16s_5381 | 0.784187147 | -0.245747049 | 3.549304463 | 2.455898234 | 0.930381198 | NA |

|              |             |              |             |             |             |    |
|--------------|-------------|--------------|-------------|-------------|-------------|----|
| ASV_16s_5382 | 0.808597831 | -0.924087741 | 3.54899514  | 1.921675096 | NA          | NA |
| ASV_16s_5383 | 0.741419826 | 0.411890101  | 3.549107953 | 2.464998998 | NA          | NA |
| ASV_16s_5384 | 0.715242951 | 0.378076831  | 3.54822504  | 2.161572177 | NA          | NA |
| ASV_16s_5385 | 0.95006755  | -0.795318169 | 3.548200963 | 2.059488086 | 0.956474524 | NA |
| ASV_16s_5386 | 0.845718382 | 0.310189376  | 3.548384935 | 2.950985799 | 0.889499106 | NA |
| ASV_16s_5387 | 0.895451661 | -0.792176672 | 3.548800586 | 2.221823189 | 0.946549915 | NA |
| ASV_16s_5388 | 0.903448373 | -0.581107579 | 3.289525037 | 2.766152055 | 0.905759797 | NA |
| ASV_16s_5389 | 1.122282661 | 2.609227514  | 3.547680736 | 0.658624019 | 0.998633846 | NA |
| ASV_16s_5390 | 0.92619213  | 2.416125768  | 2.861064605 | 1.564375695 | 0.979996921 | NA |
| ASV_16s_5391 | 0.979260304 | 1.223348346  | 3.548835088 | 1.367534218 | 0.986544972 | NA |
| ASV_16s_5392 | 0.850413694 | 0.354401863  | 3.551441014 | 0.472770102 | NA          | NA |
| ASV_16s_5393 | 0.806216389 | -1.061732671 | 3.547418914 | 1.485748026 | 0.982798964 | NA |
| ASV_16s_5394 | 0.774287728 | -0.069556477 | 3.549472891 | 2.523068796 | 0.925349967 | NA |
| ASV_16s_5395 | 1.776150878 | 1.253691076  | 3.549280762 | 1.341389211 | NA          | NA |
| ASV_16s_5396 | 1.027417071 | -0.024985565 | 3.550388974 | 1.953988648 | 0.962342997 | NA |
| ASV_16s_5397 | 0.933629141 | 0.693909967  | 3.550631821 | 1.657154333 | 0.976365334 | NA |
| ASV_16s_5398 | 0.751899138 | -0.270971648 | 3.549320344 | 2.401618484 | 0.934321337 | NA |
| ASV_16s_5399 | 0.728774804 | -0.277911204 | 3.549333972 | 2.366296068 | NA          | NA |
| ASV_16s_5400 | 0.750391477 | -0.314878316 | 3.549312815 | 2.362811097 | 0.937068538 | NA |
| ASV_16s_5401 | 0.762724916 | -0.356547308 | 3.549300008 | 2.326346291 | 0.93959628  | NA |
| ASV_16s_5402 | 0.25813956  | -0.675054487 | 3.550442026 | 0.777405979 | NA          | NA |
| ASV_16s_5403 | 0.813651685 | 0.260077218  | 3.549171351 | 2.488899688 | 0.927930607 | NA |
| ASV_16s_5404 | 0.791815799 | 0.209334493  | 3.549104328 | 2.157947743 | 0.950583309 | NA |
| ASV_16s_5405 | 0.782091211 | 0.051366968  | 3.549047592 | 2.63378674  | 0.916690498 | NA |
| ASV_16s_5406 | 0.758472778 | 0.275631899  | 3.549141246 | 2.061592806 | 0.956352758 | NA |
| ASV_16s_5407 | 0.759890563 | 0.593304796  | 3.548164058 | 2.296726783 | NA          | NA |
| ASV_16s_5408 | 0.958873786 | -0.795504706 | 3.548193881 | 1.989188158 | 0.960436352 | NA |
| ASV_16s_5409 | 0.838555655 | -0.487487923 | 2.741827522 | 3.325646859 | 0.853333303 | NA |
| ASV_16s_5410 | 0.868507614 | -0.12039309  | 3.549581671 | 2.009680175 | 0.959302649 | NA |
| ASV_16s_5411 | 0.928324179 | 0.079312801  | 3.548263233 | 2.096409934 | 0.954311972 | NA |
| ASV_16s_5412 | 1.035869991 | 2.429407567  | 2.935935237 | 1.275938745 | 0.98907206  | NA |
| ASV_16s_5413 | 0.970427623 | 1.864693711  | 3.54701764  | 1.320752949 | NA          | NA |
| ASV_16s_5414 | 1.059617104 | 0.255775392  | 3.55014293  | 2.050692993 | 0.956981374 | NA |
| ASV_16s_5415 | 0.914001544 | 0.593752277  | 3.147580389 | 2.810707483 | 0.901943756 | NA |
| ASV_16s_5416 | 1.269847067 | -0.551676629 | 3.54894804  | 1.197423443 | NA          | NA |
| ASV_16s_5417 | 0.531681331 | 0.219973045  | 3.550630922 | 1.272129794 | NA          | NA |
| ASV_16s_5418 | 0.339060767 | 1.292678108  | 3.550221362 | 0.970083875 | NA          | NA |
| ASV_16s_5419 | 0.667922699 | 0.591498987  | 3.549659837 | 1.276033646 | 0.989069607 | NA |
| ASV_16s_5420 | 1.067811179 | 0.668470099  | 3.550670185 | 2.919816744 | NA          | NA |
| ASV_16s_5421 | 0.984886908 | 0.771548828  | 3.54958834  | 2.633773021 | 0.916691598 | NA |
| ASV_16s_5422 | 1.045220904 | 0.361635594  | 3.5502391   | 1.419401504 | 0.98496959  | NA |
| ASV_16s_5423 | 1.045159308 | 0.59443445   | 3.550634002 | 3.036284261 | 0.881625465 | NA |
| ASV_16s_5424 | 1.105290944 | 1.184403716  | 3.549884814 | 1.37833542  | 0.986225607 | NA |
| ASV_16s_5425 | 0.997280387 | 0.693924118  | 3.550626747 | 1.690722105 | 0.97496381  | NA |
| ASV_16s_5426 | 0.779807683 | -0.328917277 | 3.549292693 | 2.384869372 | 0.935514201 | NA |
| ASV_16s_5428 | 0.766191494 | 0.120988219  | 3.548697421 | 2.588701791 | 0.920270958 | NA |
| ASV_16s_5429 | 0.776577017 | 0.218561673  | 3.548574754 | 2.68038611  | 0.912912795 | NA |
| ASV_16s_5430 | 0.803796982 | -0.580826485 | 3.548050414 | 1.897210604 | 0.965309696 | NA |
| ASV_16s_5431 | 0.754594637 | 0.629284999  | 3.548442745 | 2.48708329  | 0.928066561 | NA |
| ASV_16s_5432 | 0.986217065 | -0.029599337 | 3.547279735 | 2.352493613 | NA          | NA |
| ASV_16s_5433 | 0.935906424 | -0.794781404 | 3.548282022 | 2.170883626 | 0.949779839 | NA |
| ASV_16s_5434 | 0.982613017 | -0.9034396   | 3.547986743 | 1.881254418 | 0.966119201 | NA |
| ASV_16s_5435 | 0.941578876 | -0.048308574 | 3.548282642 | 2.19388317  | NA          | NA |
| ASV_16s_5436 | 1.063629281 | -0.845556365 | 3.548406285 | 1.772145284 | 0.971369526 | NA |
| ASV_16s_5437 | 1.025283136 | 0.416575642  | 3.293761507 | 2.247966099 | 0.944851622 | NA |
| ASV_16s_5438 | 0.797820153 | -0.088784246 | 3.549630549 | 2.083821212 | 0.955055613 | NA |
| ASV_16s_5439 | 0.973363077 | -0.212162691 | 3.549930058 | 2.355954747 | 0.937547801 | NA |
| ASV_16s_5440 | 0.777791295 | -0.459016107 | 3.54730652  | 1.75125595  | 0.972318001 | NA |
| ASV_16s_5441 | 0.33845065  | -0.159720915 | 3.549622212 | 1.538513489 | NA          | NA |
| ASV_16s_5442 | 0.368742149 | 1.336149495  | 3.550181617 | 0.786847097 | NA          | NA |
| ASV_16s_5443 | 0.806090479 | 3.022585655  | 3.547271788 | 0.374434366 | NA          | NA |
| ASV_16s_5444 | 0.872809351 | 0.209740174  | 3.548248425 | 2.570687846 | 0.921680811 | NA |
| ASV_16s_5445 | 0.969149767 | 0.38998927   | 3.550372042 | 0.890343159 | 0.99640899  | NA |
| ASV_16s_5446 | 0.932187606 | 0.364048882  | 3.550417214 | 1.045788988 | 0.994055694 | NA |
| ASV_16s_5447 | 1.035420199 | 0.372785803  | 3.550208633 | 2.02922889  | 0.958204901 | NA |
| ASV_16s_5448 | 1.203327711 | 0.7957078    | 3.548466861 | 1.778320596 | 0.97108565  | NA |
| ASV_16s_5449 | 0.949322864 | 0.279848041  | 3.549511891 | 3.255439847 | NA          | NA |



|              |             |              |             |             |             |    |
|--------------|-------------|--------------|-------------|-------------|-------------|----|
| ASV_16s_5450 | 1.062580569 | 1.187518052  | 3.549588316 | 1.291752758 | 0.988658668 | NA |
| ASV_16s_5451 | 0.740738436 | -0.231182687 | 3.549334163 | 2.404484333 | 0.934116144 | NA |
| ASV_16s_5452 | 0.734081577 | -0.321661421 | 3.549322455 | 2.333843876 | NA          | NA |
| ASV_16s_5453 | 0.724229017 | -0.335416146 | 3.549327335 | 2.304301784 | NA          | NA |
| ASV_16s_5454 | 0.773897489 | -0.355745102 | 3.549293232 | 2.341767484 | 0.938533653 | NA |
| ASV_16s_5455 | 0.255222728 | -0.673946004 | 3.550457852 | 0.773631598 | NA          | NA |
| ASV_16s_5456 | 0.154455848 | -0.169858544 | 3.550678583 | 0.679644246 | 0.998487299 | NA |
| ASV_16s_5457 | 0.803287869 | 0.083205279  | 3.548464182 | 2.695921026 | 0.911636247 | NA |
| ASV_16s_5458 | 0.781895789 | 9.91E-04     | 3.54818675  | 2.805660943 | NA          | NA |
| ASV_16s_5459 | 0.478959879 | 0.710033196  | 3.548793685 | 1.645959115 | 0.976822375 | NA |
| ASV_16s_5460 | 0.759840397 | 0.088881616  | 3.547622358 | 2.188833662 | NA          | NA |
| ASV_16s_5461 | 0.803123582 | -0.197857704 | 3.548343125 | 2.701966174 | 0.911137199 | NA |
| ASV_16s_5462 | 0.868973249 | 0.471085825  | 3.547516395 | 2.407350175 | NA          | NA |
| ASV_16s_5463 | 0.968855505 | -0.794607311 | 3.548297567 | 2.231522336 | 0.945923046 | NA |
| ASV_16s_5464 | 0.790828568 | -1.404240774 | 3.548358629 | 1.432509932 | NA          | NA |
| ASV_16s_5465 | 0.933270046 | -0.793971554 | 3.548426927 | 2.232050697 | 0.945888788 | NA |
| ASV_16s_5466 | 0.940998832 | 0.160786383  | 3.549318936 | 2.485562225 | 0.928180314 | NA |
| ASV_16s_5467 | 0.798574139 | 0.853902423  | 3.547776822 | 1.437563728 | NA          | NA |
| ASV_16s_5468 | 0.653077821 | 1.786689262  | 3.548863204 | 1.5283904   | NA          | NA |
| ASV_16s_5469 | 0.839180777 | 0.603390788  | 3.548751051 | 1.464663642 | NA          | NA |
| ASV_16s_5470 | 0.516525323 | 0.219974218  | 3.550632523 | 1.25742746  | 0.989543984 | NA |
| ASV_16s_5471 | 0.525673633 | 0.219973542  | 3.550631546 | 1.266348811 | NA          | NA |
| ASV_16s_5472 | 0.79781248  | 2.158462291  | 3.548189263 | 0.886306696 | 0.9964602   | NA |
| ASV_16s_5473 | 0.887949624 | 1.126573937  | 3.548888968 | 1.530532664 | 0.981233755 | NA |
| ASV_16s_5474 | 0.97005159  | 1.205693629  | 3.549320205 | 1.150921028 | NA          | NA |
| ASV_16s_5475 | 1.065910478 | 0.270533056  | 3.549608241 | 3.381380788 | NA          | NA |
| ASV_16s_5476 | 1.101443516 | 1.18722657   | 3.549656421 | 1.326233059 | 0.987724338 | NA |
| ASV_16s_5477 | 1.095441298 | 0.735277046  | 3.550673904 | 1.779305669 | NA          | NA |
| ASV_16s_5478 | 0.721301388 | -0.254497814 | 3.549343027 | 2.369853287 | NA          | NA |
| ASV_16s_5479 | 0.723964729 | -0.352946073 | 3.549325726 | 2.280451827 | NA          | NA |
| ASV_16s_5480 | 0.460124779 | 0.219979516  | 3.550639406 | 1.198694254 | NA          | NA |
| ASV_16s_5481 | 0.246318845 | 0.220020958  | 3.550694061 | 0.882201326 | 0.996511794 | NA |
| ASV_16s_5482 | 0.724813925 | -0.170753477 | 3.548467226 | 2.117065345 | NA          | NA |
| ASV_16s_5483 | 0.782645391 | 0.009050161  | 3.548247504 | 2.532943868 | 0.924595996 | NA |
| ASV_16s_5484 | 0.775912255 | 0.814579473  | 3.547444435 | 2.482945442 | NA          | NA |
| ASV_16s_5485 | 0.885263046 | -0.150760337 | 3.54812033  | 2.787713571 | 0.903921537 | NA |
| ASV_16s_5486 | 0.913813569 | 0.680734995  | 3.548504422 | 2.516562834 | 0.925844711 | NA |
| ASV_16s_5487 | 0.855521862 | -0.861477544 | 3.548192898 | 1.801455935 | 0.970007968 | NA |
| ASV_16s_5488 | 0.853467034 | -0.299385941 | 3.549000728 | 2.901903246 | 0.893926213 | NA |
| ASV_16s_5489 | 0.999276949 | -1.609210011 | 2.943572997 | 1.77404048  | 0.971282574 | NA |
| ASV_16s_5490 | 0.758143354 | -0.086495257 | 3.550361244 | 1.93027513  | 0.963598399 | NA |
| ASV_16s_5491 | 0.930140876 | 0.21527731   | 3.550542721 | 2.561502334 | 0.922395116 | NA |
| ASV_16s_5492 | 1.042202939 | 0.009160397  | 3.347745514 | 2.415171637 | NA          | NA |
| ASV_16s_5493 | 0.800684706 | -0.074007396 | 3.549508547 | 2.193573294 | 0.948354128 | NA |
| ASV_16s_5494 | 0.719094053 | 2.370927962  | 3.548481094 | 1.144862988 | NA          | NA |
| ASV_16s_5495 | 0.720702186 | -0.111389874 | 3.550427304 | 0.657778197 | 0.998639535 | NA |
| ASV_16s_5496 | 0.314566969 | 0.530478572  | 3.54999765  | 1.491230953 | NA          | NA |
| ASV_16s_5497 | 0.498363964 | 0.219975675  | 3.550634569 | 1.239238501 | 0.9899952   | NA |
| ASV_16s_5498 | 0.502090471 | 0.219975362  | 3.550634137 | 1.243023112 | 0.98990233  | NA |
| ASV_16s_5499 | 0.757109866 | 1.165014964  | 3.548548549 | 2.098420693 | 0.954192589 | NA |
| ASV_16s_5500 | 0.782785986 | -0.069575951 | 3.54946528  | 2.536003895 | 0.924361622 | NA |
| ASV_16s_5501 | 0.865840624 | 0.646337493  | 3.54960598  | 1.713817799 | NA          | NA |
| ASV_16s_5502 | 1.040012859 | 1.54518408   | 3.548899602 | 1.247175405 | 0.989799825 | NA |
| ASV_16s_5503 | 1.143418352 | -0.366698277 | 3.548600928 | 2.56004564  | 0.922508108 | NA |
| ASV_16s_5504 | 0.942628435 | 1.492598659  | 3.548854458 | 1.727653975 | 0.973367743 | NA |
| ASV_16s_5505 | 1.170021259 | 1.463552359  | 3.548567209 | 2.131094678 | 0.952229424 | NA |
| ASV_16s_5506 | 0.919992855 | -0.116343955 | 3.549940702 | 2.105710647 | 0.953758378 | NA |
| ASV_16s_5507 | 1.142960558 | 1.03006884   | 3.549949947 | 2.875845923 | NA          | NA |
| ASV_16s_5508 | 1.160216446 | 0.712673463  | 3.549409138 | 2.536488332 | 0.924324486 | NA |
| ASV_16s_5509 | 0.78829414  | 0.360435826  | 3.550722771 | 1.675607557 | NA          | NA |
| ASV_16s_5510 | 1.002238325 | 0.751200975  | 3.550189432 | 2.251609066 | 0.94461279  | NA |
| ASV_16s_5511 | 0.748605573 | -0.405721468 | 3.549306855 | 2.223192914 | 0.946461618 | NA |
| ASV_16s_5512 | 0.348072578 | 0.199160293  | 3.550616805 | 2.485227777 | 0.928205314 | NA |
| ASV_16s_5513 | 0.457480384 | 0.219979802  | 3.550639771 | 1.195764081 | NA          | NA |
| ASV_16s_5514 | 0.758220002 | 0.349019637  | 3.548714021 | 2.261737966 | 0.943945949 | NA |
| ASV_16s_5515 | 0.77237522  | 1.37844787   | 3.547499959 | 2.160367064 | 0.950433558 | NA |
| ASV_16s_5516 | 1.030739298 | 0.988378758  | 3.545570033 | 1.214836705 | 0.990581264 | NA |

|              |             |              |             |              |             |    |
|--------------|-------------|--------------|-------------|--------------|-------------|----|
| ASV_16s_5517 | 0.8553445   | 0.755698266  | 3.547548985 | 2.448640014  | NA          | NA |
| ASV_16s_5518 | 0.864570039 | -0.077062003 | 3.547775928 | 2.645011214  | 0.915787662 | NA |
| ASV_16s_5519 | 0.86296346  | -0.147114224 | 3.549491257 | 1.925798891  | NA          | NA |
| ASV_16s_5520 | 0.959056477 | -0.827993541 | 3.070720651 | 2.379358652  | 0.935904291 | NA |
| ASV_16s_5521 | 0.988945447 | 1.884470322  | 3.317510948 | 1.007835826  | 0.994701141 | NA |
| ASV_16s_5522 | 0.784982972 | -0.561859578 | 3.548026932 | 1.946792097  | 0.962726462 | NA |
| ASV_16s_5523 | 0.370001068 | 0.750443204  | 3.549591415 | 1.130946943  | NA          | NA |
| ASV_16s_5524 | 0.932405239 | -1.925058001 | 2.859360552 | 1.068260474  | 0.993650983 | NA |
| ASV_16s_5525 | 0.856021482 | 2.390557814  | 3.548652245 | 1.266184889  | 0.989322328 | NA |
| ASV_16s_5526 | 0.816962001 | 1.38529263   | 3.388523312 | 1.653454403  | 0.976516956 | NA |
| ASV_16s_5527 | 1.104501654 | 0.789474009  | 3.549239077 | 2.683997792  | NA          | NA |
| ASV_16s_5528 | 0.773543432 | 1.014525202  | 3.54794471  | 1.805144991  | NA          | NA |
| ASV_16s_5529 | 1.726259    | 1.253648663  | 3.549292741 | 1.332180845  | NA          | NA |
| ASV_16s_5530 | 1.058121757 | 0.210380672  | 3.549345795 | 2.953206591  | 0.889296984 | NA |
| ASV_16s_5531 | 1.028401329 | 0.363469976  | 3.549740602 | 1.318252933  | 0.987944623 | NA |
| ASV_16s_5532 | 0.88489379  | 0.315939233  | 3.55066848  | 1.695405526  | 0.974764549 | NA |
| ASV_16s_5533 | 1.000490935 | 0.693925106  | 3.550626509 | 1.692335903  | 0.974895252 | NA |
| ASV_16s_5534 | 1.029462777 | 0.69393782   | 3.550624421 | 1.706867012  | 0.974273064 | NA |
| ASV_16s_5535 | 0.715830538 | -0.191535956 | 3.549360803 | 2.373332766  | NA          | NA |
| ASV_16s_5536 | 0.726292201 | -0.252597629 | 3.549339915 | 2.377499232  | NA          | NA |
| ASV_16s_5537 | 0.742449116 | -0.408754091 | 3.549310935 | 2.209136829  | 0.947364131 | NA |
| ASV_16s_5538 | 0.250847482 | -0.672131842 | 3.550482164 | 0.767876878  | NA          | NA |
| ASV_16s_5539 | 0.732234688 | 0.066550039  | 3.54856089  | 2.571300697  | NA          | NA |
| ASV_16s_5540 | 0.759659172 | 0.026828891  | 3.548397343 | 2.269122018  | 0.943457231 | NA |
| ASV_16s_5541 | 0.940825147 | -0.794757404 | 3.548285952 | 2.182262474  | 0.949067457 | NA |
| ASV_16s_5542 | 0.907413954 | -0.794193898 | 3.548389647 | 2.188406495  | 0.948680621 | NA |
| ASV_16s_5543 | 0.901757314 | 0.453825508  | 3.548017125 | 2.203131528  | 0.947747289 | NA |
| ASV_16s_5544 | 0.505418068 | 0.930811971  | 3.548330918 | 1.956679651  | NA          | NA |
| ASV_16s_5545 | 0.885900183 | -0.921927053 | 3.547915318 | 1.7535323    | 0.972215527 | NA |
| ASV_16s_5546 | 0.904408708 | -24.05424224 | 3.551021145 | -0.221646992 | NA          | NA |
| ASV_16s_5547 | 0.744566926 | -0.783988559 | 3.548920061 | 1.760339486  | 0.971907803 | NA |
| ASV_16s_5548 | 0.838191808 | -0.324850872 | 3.549312128 | 1.156931211  | 0.991884976 | NA |
| ASV_16s_5549 | 0.793511376 | -0.104141104 | 3.54975649  | 2.009262307  | 0.959325942 | NA |
| ASV_16s_5550 | 0.819812205 | 0.164128934  | 3.548248549 | 2.777937448  | NA          | NA |
| ASV_16s_5551 | 0.697758242 | -0.637761996 | 3.5485439   | 1.385087039  | NA          | NA |
| ASV_16s_5552 | 0.360361645 | 1.336014634  | 3.550211841 | 0.779443611  | NA          | NA |
| ASV_16s_5553 | 0.48923515  | 0.219976476  | 3.550635655 | 1.229840328  | 0.990223523 | NA |
| ASV_16s_5554 | 0.888045818 | -0.279696299 | 3.548594323 | 3.23774264   | 0.862172783 | NA |
| ASV_16s_5555 | 1.716280624 | 1.253639981  | 3.54929522  | 1.330307254  | NA          | NA |
| ASV_16s_5556 | 0.913483809 | 0.095560842  | 3.549627818 | 3.580114299  | 0.826668461 | NA |
| ASV_16s_5557 | 1.05336545  | 0.670049054  | 3.550667274 | 2.430453402  | NA          | NA |
| ASV_16s_5558 | 0.824930009 | 0.343352726  | 3.549418124 | 2.553614672  | 0.923006007 | NA |
| ASV_16s_5559 | 0.967669207 | 0.563243499  | 3.550643477 | 3.08563749   | 0.876968614 | NA |
| ASV_16s_5560 | 0.948605575 | 0.315939222  | 3.550663027 | 1.730780061  | 0.973230038 | NA |
| ASV_16s_5561 | 0.97861522  | 0.693919209  | 3.550628168 | 1.681079054  | 0.975371213 | NA |
| ASV_16s_5562 | 0.288371895 | 0.006261515  | 3.550619496 | 1.75255855   | NA          | NA |
| ASV_16s_5563 | 0.285146777 | 0.122271001  | 3.550647121 | 1.582166346  | NA          | NA |
| ASV_16s_5564 | 0.769537029 | -0.418114009 | 3.54869313  | 2.288357439  | NA          | NA |
| ASV_16s_5565 | 0.740915198 | 0.128494663  | 3.548314133 | 2.77883039   | NA          | NA |
| ASV_16s_5566 | 0.748088532 | 0.232771853  | 3.548449996 | 2.488702604  | NA          | NA |
| ASV_16s_5567 | 0.961509514 | 2.115617916  | 3.548783107 | 0.787052864  | NA          | NA |
| ASV_16s_5568 | 0.951694206 | -0.79463616  | 3.548297089 | 2.206726112  | 0.947518118 | NA |
| ASV_16s_5569 | 0.895639652 | 0.604544258  | 3.303310767 | 3.11615263   | 0.874053214 | NA |
| ASV_16s_5570 | 0.803138403 | 0.684099065  | 3.547331158 | 2.438055507  | 0.931688872 | NA |
| ASV_16s_5571 | 0.884272818 | -2.387466311 | 3.546856035 | 1.369809462  | 0.986478078 | NA |
| ASV_16s_5572 | 0.832359092 | -0.32453381  | 3.549135514 | 1.389310061  | 0.985896439 | NA |
| ASV_16s_5573 | 0.839742203 | -0.517510414 | 3.548043552 | 2.294090688  | 0.941788563 | NA |
| ASV_16s_5574 | 0.844139207 | -0.238564746 | 3.328363082 | 2.478988995  | 0.928670887 | NA |
| ASV_16s_5575 | 0.659124903 | -0.067746958 | 3.549964409 | 1.024106247  | 0.994430239 | NA |
| ASV_16s_5576 | 0.736244555 | -0.105520337 | 3.549155988 | 2.676011928  | 0.913270693 | NA |
| ASV_16s_5577 | 0.483032205 | 0.219977043  | 3.550636417 | 1.22335554   | 0.990379162 | NA |
| ASV_16s_5578 | 0.482942228 | 0.219977199  | 3.550636428 | 1.223261063  | 0.990381418 | NA |
| ASV_16s_5579 | 0.51356226  | 0.219974469  | 3.550632847 | 1.254491646  | 0.989617648 | NA |
| ASV_16s_5580 | 0.770596068 | 2.528177632  | 3.547487021 | 1.078852099  | NA          | NA |
| ASV_16s_5581 | 0.988362432 | -0.241048975 | 3.548075641 | 2.219174069  | NA          | NA |
| ASV_16s_5582 | 1.016713737 | 0.670453616  | 3.550103298 | 2.525816958  | 0.925140508 | NA |
| ASV_16s_5583 | 0.974642441 | 0.368843295  | 3.550608105 | 0.944144482  | 0.995679952 | NA |

|              |             |              |             |             |             |    |
|--------------|-------------|--------------|-------------|-------------|-------------|----|
| ASV_16s_5584 | 1.282177034 | 0.303544202  | 3.550612499 | 3.599409422 | 0.82458674  | NA |
| ASV_16s_5585 | 0.994168316 | 0.693925012  | 3.550626981 | 1.689108431 | 0.975032254 | NA |
| ASV_16s_5586 | 0.773719595 | -0.326911552 | 3.549296619 | 2.379467427 | 0.935896602 | NA |
| ASV_16s_5587 | 0.731140176 | -0.346468415 | 3.549321444 | 2.299099917 | 0.941450808 | NA |
| ASV_16s_5588 | 0.364067009 | 0.219992065  | 3.550656033 | 1.079836954 | 0.993435838 | NA |
| ASV_16s_5590 | 0.759507538 | 0.632239582  | 3.54808601  | 2.453639009 | NA          | NA |
| ASV_16s_5591 | 0.792692294 | 0.197531304  | 3.105758106 | 3.114001216 | 0.874259649 | NA |
| ASV_16s_5592 | 0.795538999 | -0.050717408 | 3.548390228 | 2.119779328 | 0.952914241 | NA |
| ASV_16s_5593 | 0.619555419 | 0.819652218  | 3.548445121 | 2.284860083 | NA          | NA |
| ASV_16s_5594 | 0.943952488 | -0.794938792 | 3.548231823 | 2.128437569 | 0.952390706 | NA |
| ASV_16s_5595 | 0.751058281 | 1.7686315    | 3.548574701 | 0.680747758 | NA          | NA |
| ASV_16s_5596 | 0.988751354 | -0.372247166 | 3.550176404 | 1.059886168 | 0.993803788 | NA |
| ASV_16s_5597 | 0.74761068  | 0.440551772  | 3.550419416 | 1.696401279 | 0.974722066 | NA |
| ASV_16s_5598 | 0.749852287 | 0.063652569  | 3.548329181 | 1.943841601 | 0.962883054 | NA |
| ASV_16s_5599 | 0.450688822 | 1.33717601   | 3.549944973 | 0.851387121 | NA          | NA |
| ASV_16s_5600 | 0.714121752 | 0.360304421  | 3.549208876 | 3.195315966 | 0.866365164 | NA |
| ASV_16s_5601 | 0.689007347 | 0.037930305  | 3.549168192 | 2.09738665  | NA          | NA |
| ASV_16s_5602 | 0.980828248 | -0.001005556 | 3.546568781 | 1.975939417 | NA          | NA |
| ASV_16s_5603 | 1.212918977 | 0.889121516  | 3.549445444 | 2.651629187 | 0.915253227 | NA |
| ASV_16s_5604 | 0.986583119 | 0.363334432  | 3.550121723 | 1.371216835 | 0.986436598 | NA |
| ASV_16s_5605 | 0.948041588 | 1.084839424  | 3.550307431 | 1.406040393 | 0.985385534 | NA |
| ASV_16s_5606 | 1.064142975 | 0.735266485  | 3.550676802 | 1.764526127 | NA          | NA |
| ASV_16s_5607 | 1.064142975 | 0.735266485  | 3.550676802 | 1.764526127 | NA          | NA |
| ASV_16s_5608 | 0.969771987 | 0.693920804  | 3.55062886  | 1.67646064  | 0.975564966 | NA |
| ASV_16s_5609 | 0.945240256 | 0.693909907  | 3.550630847 | 1.663409391 | 0.976107715 | NA |
| ASV_16s_5610 | 0.708349181 | -0.347728267 | 3.549337217 | 2.266360104 | NA          | NA |
| ASV_16s_5611 | 0.759860827 | -0.395026558 | 3.54929974  | 2.258256105 | 0.944175642 | NA |
| ASV_16s_5612 | 0.700838299 | -0.416973838 | 3.54934055  | 2.136934749 | NA          | NA |
| ASV_16s_5613 | 0.917815988 | -0.684742661 | 3.549220699 | 1.186127578 | 0.991242807 | NA |
| ASV_16s_5614 | 0.259405475 | 0.040838223  | 3.550626627 | 1.865374665 | NA          | NA |
| ASV_16s_5615 | 0.3066489   | 0.22000351   | 3.550670935 | 0.992892236 | NA          | NA |
| ASV_16s_5616 | 0.709346162 | 0.261860809  | 3.549113345 | 2.310808374 | NA          | NA |
| ASV_16s_5617 | 0.784817478 | 0.517501857  | 3.54811506  | 2.63110513  | 0.91690552  | NA |
| ASV_16s_5618 | 0.931265511 | -0.795530509 | 3.548250666 | 1.863243321 | 0.967020179 | NA |
| ASV_16s_5619 | 0.756063444 | -0.336972938 | 3.548104433 | 2.365116341 | 0.936906987 | NA |
| ASV_16s_5620 | 0.738387323 | 0.377362268  | 3.547699235 | 1.444341771 | NA          | NA |
| ASV_16s_5621 | 0.795520797 | 0.211226128  | 3.548175744 | 2.525112088 | 0.925194258 | NA |
| ASV_16s_5622 | 0.763913943 | -0.671420151 | 3.548173552 | 2.331480103 | 0.939243564 | NA |
| ASV_16s_5623 | 0.733390637 | -0.683778363 | 3.548467432 | 1.88908939  | NA          | NA |
| ASV_16s_5624 | 0.904624989 | -0.794665383 | 3.548293545 | 2.122448702 | 0.95275316  | NA |
| ASV_16s_5625 | 0.904111074 | -0.872515826 | 3.548384769 | 2.133997206 | 0.952052916 | NA |
| ASV_16s_5626 | 0.893711982 | -0.793194651 | 3.548592794 | 2.213340231 | 0.947095074 | NA |
| ASV_16s_5627 | 0.861667767 | -0.791981261 | 3.548847327 | 2.189919645 | 0.948585116 | NA |
| ASV_16s_5628 | 0.907118705 | 2.769171934  | 3.547948631 | 1.002548532 | 0.99478732  | NA |
| ASV_16s_5629 | 0.789185137 | -0.12404187  | 3.549661432 | 1.90361636  | NA          | NA |
| ASV_16s_5630 | 0.787774752 | -0.111986908 | 3.549718611 | 1.965411437 | 0.961729911 | NA |
| ASV_16s_5631 | 0.988715969 | 1.187071118  | 3.549987074 | 1.025076035 | NA          | NA |
| ASV_16s_5632 | 0.248691129 | 0.41239015   | 3.550869895 | 0.678683869 | NA          | NA |
| ASV_16s_5633 | 1.012974038 | 1.315298922  | 2.936000881 | 2.628393794 | 0.917122663 | NA |
| ASV_16s_5634 | 1.044108469 | -2.182147904 | 3.547345349 | 0.586251747 | NA          | NA |
| ASV_16s_5635 | 0.706313926 | -0.128094149 | 3.54829205  | 1.904373005 | NA          | NA |
| ASV_16s_5636 | 1.130831984 | 1.205993403  | 3.549246508 | 1.200360617 | NA          | NA |
| ASV_16s_5637 | 1.09885333  | 0.997390181  | 3.447477709 | 2.039441617 | 0.957625117 | NA |
| ASV_16s_5638 | 0.903945824 | 0.315939258  | 3.55066677  | 1.706221603 | 0.974300885 | NA |
| ASV_16s_5639 | 0.908388904 | 0.707393228  | 3.550598463 | 2.951604848 | 0.889442779 | NA |
| ASV_16s_5640 | 0.941861675 | 0.454380755  | 3.550656457 | 3.146897909 | 0.871088504 | NA |
| ASV_16s_5641 | 0.899956173 | -0.684699343 | 3.549230375 | 1.179787967 | 0.991384853 | NA |
| ASV_16s_5642 | 0.738327244 | 0.095055011  | 3.549322307 | 2.406687666 | 0.93395817  | NA |
| ASV_16s_5643 | 0.730382742 | -0.055533191 | 3.548899616 | 2.268865981 | 0.943474213 | NA |
| ASV_16s_5644 | 0.76613993  | 0.134511903  | 3.548703217 | 2.595028393 | 0.919772987 | NA |
| ASV_16s_5645 | 0.734058403 | 0.256163701  | 3.548989788 | 2.398069233 | 0.934575022 | NA |
| ASV_16s_5646 | 0.752497833 | 0.03041253   | 3.548843001 | 2.30901939  | 0.940779037 | NA |
| ASV_16s_5647 | 0.742942253 | 0.600156317  | 3.548289189 | 2.597789184 | NA          | NA |
| ASV_16s_5648 | 0.699845682 | -0.715834442 | 3.548503699 | 1.872008814 | NA          | NA |
| ASV_16s_5649 | 0.923211231 | -0.795102773 | 3.548234433 | 2.070387616 | 0.955841969 | NA |
| ASV_16s_5650 | 0.810273084 | 0.08347851   | 3.548220812 | 2.96608384  | 0.888121919 | NA |
| ASV_16s_5651 | 0.642054057 | 1.072345733  | 3.548029097 | 2.072945319 | 0.955692823 | NA |

|              |             |              |             |             |             |    |
|--------------|-------------|--------------|-------------|-------------|-------------|----|
| ASV_16s_5652 | 0.727490594 | -0.250902695 | 3.548815306 | 1.897169201 | NA          | NA |
| ASV_16s_5653 | 0.882259921 | -0.793101061 | 3.548610649 | 2.202798134 | 0.947768518 | NA |
| ASV_16s_5654 | 0.82326694  | 0.174073447  | 2.634449964 | 3.038829508 | 0.881387089 | NA |
| ASV_16s_5655 | 0.78740025  | -0.989890391 | 3.548388244 | 1.755627373 | NA          | NA |
| ASV_16s_5656 | 0.945058871 | -1.245068379 | 3.164191485 | 1.463408622 | 0.983549484 | NA |
| ASV_16s_5657 | 0.801424019 | -0.106245053 | 3.549595389 | 1.948409928 | 0.962640444 | NA |
| ASV_16s_5658 | 0.791281935 | 2.06850938   | 3.547940616 | 0.566176712 | NA          | NA |
| ASV_16s_5659 | 0.839505082 | -0.221332922 | 3.328359231 | 1.451691478 | 0.983935137 | NA |
| ASV_16s_5660 | 0.850758042 | 1.750289512  | 3.357847229 | 1.85478317  | 0.967438706 | NA |
| ASV_16s_5661 | 0.838651824 | 2.488267945  | 3.548265783 | 0.626333794 | 0.998839969 | NA |
| ASV_16s_5662 | 0.854991018 | 1.340752179  | 3.549471892 | 1.121202608 | NA          | NA |
| ASV_16s_5663 | 0.247219584 | 0.41197611   | 3.550877425 | 0.676699773 | NA          | NA |
| ASV_16s_5664 | 0.340928111 | -0.161764418 | 3.549615738 | 1.543713439 | NA          | NA |
| ASV_16s_5665 | 0.477129776 | 0.219977792  | 3.550637161 | 1.2171003   | 0.990527823 | NA |
| ASV_16s_5666 | 0.571740611 | 2.405136329  | 3.54905531  | 0.489406985 | 0.999484352 | NA |
| ASV_16s_5667 | 0.691131727 | 0.737094455  | 2.509441772 | 2.521855063 | 0.925442385 | NA |
| ASV_16s_5668 | 1.02105617  | 1.131753091  | 2.918252367 | 3.824110723 | 0.799798972 | NA |
| ASV_16s_5669 | 1.142057222 | 0.34649394   | 3.549162645 | 2.58398376  | 0.920641363 | NA |
| ASV_16s_5670 | 0.970930937 | -0.382571913 | 3.548376569 | 3.089137756 | 0.876635587 | NA |
| ASV_16s_5671 | 1.046690349 | 0.800871995  | 3.548712922 | 1.733420866 | NA          | NA |
| ASV_16s_5672 | 1.405963819 | 0.360453326  | 3.550665965 | 1.970289938 | NA          | NA |
| ASV_16s_5673 | 0.951161829 | 0.69391619   | 3.550630358 | 1.666591571 | 0.975976032 | NA |
| ASV_16s_5674 | 0.922140793 | 0.693902697  | 3.550632814 | 1.650806382 | 0.976625123 | NA |
| ASV_16s_5675 | 0.715859705 | -0.239963182 | 3.549349394 | 2.368191684 | 0.936691144 | NA |
| ASV_16s_5676 | 0.722300974 | -0.267054392 | 3.549340481 | 2.364393214 | 0.936957686 | NA |
| ASV_16s_5677 | 0.697888189 | -0.3350354   | 3.549346185 | 2.268366066 | 0.943507364 | NA |
| ASV_16s_5678 | 0.645050806 | 0.243125593  | 3.549031532 | 2.164139856 | NA          | NA |
| ASV_16s_5679 | 0.750297901 | -1.267943095 | 3.54819798  | 1.392766111 | 0.985791802 | NA |
| ASV_16s_5680 | 0.739918418 | 0.532545654  | 3.547981659 | 2.498990959 | 0.927173028 | NA |
| ASV_16s_5681 | 0.626691268 | 0.66314636   | 3.548525358 | 2.284251437 | NA          | NA |
| ASV_16s_5682 | 0.734439038 | 1.445704896  | 3.547469643 | 2.108299955 | 0.953603626 | NA |
| ASV_16s_5683 | 0.871130004 | -0.291894322 | 2.77734119  | 3.551994516 | 0.829687992 | NA |
| ASV_16s_5684 | 0.847507997 | -0.793876306 | 3.548465696 | 2.13202009  | 0.952173186 | NA |
| ASV_16s_5685 | 0.450179165 | 0.133596351  | 3.548878965 | 1.078825983 | NA          | NA |
| ASV_16s_5686 | 0.925111202 | -0.922961336 | 3.547701862 | 1.797793025 | 0.970180083 | NA |
| ASV_16s_5687 | 0.873051058 | -0.79308161  | 3.548618738 | 2.193550967 | 0.948355541 | NA |
| ASV_16s_5688 | 0.752653456 | -0.975090717 | 3.548775736 | 1.855165641 | 0.96741985  | NA |
| ASV_16s_5689 | 0.988291401 | 1.097426272  | 3.54928685  | 1.806951398 | 0.969748694 | NA |
| ASV_16s_5690 | 0.752611068 | 0.201854356  | 3.549179037 | 1.840648398 | 0.968131285 | NA |
| ASV_16s_5691 | 0.809006588 | -0.111579913 | 3.549685832 | 1.67422295  | NA          | NA |
| ASV_16s_5692 | 1.004434825 | -0.265688216 | 3.547870848 | 2.09647795  | NA          | NA |
| ASV_16s_5693 | 0.69159447  | 1.930821956  | 3.549147718 | 0.91077491  | NA          | NA |
| ASV_16s_5694 | 0.930578986 | -0.321596623 | 3.54819265  | 2.565786949 | 0.922062313 | NA |
| ASV_16s_5695 | 1.133375922 | 0.014062965  | 3.549496463 | 3.63501363  | 0.820724992 | NA |
| ASV_16s_5696 | 1.052922514 | 0.724529078  | 3.5490592   | 2.512779042 | 0.92613172  | NA |
| ASV_16s_5697 | 0.886866663 | 0.343219901  | 3.549453381 | 2.485448164 | NA          | NA |
| ASV_16s_5698 | 0.953536575 | 0.315939263  | 3.550662636 | 1.733401065 | 0.973114269 | NA |
| ASV_16s_5699 | 0.885219439 | 0.315939192  | 3.550668452 | 1.695550429 | 0.97475837  | NA |
| ASV_16s_5700 | 0.695859338 | -0.168496822 | 3.549382634 | 2.340010504 | NA          | NA |
| ASV_16s_5701 | 0.697412851 | -0.194228947 | 3.549373513 | 2.347944492 | NA          | NA |
| ASV_16s_5702 | 0.725161497 | -0.260147357 | 3.549339523 | 2.372146428 | 0.936413039 | NA |
| ASV_16s_5703 | 0.690667317 | -0.257712756 | 3.549364649 | 2.325493696 | NA          | NA |
| ASV_16s_5704 | 0.685165041 | -0.30775348  | 3.54935958  | 2.28055603  | NA          | NA |
| ASV_16s_5705 | 0.242096988 | -0.667126121 | 3.550527593 | 0.755963024 | NA          | NA |
| ASV_16s_5706 | 0.242096988 | -0.667126121 | 3.550527593 | 0.755963024 | NA          | NA |
| ASV_16s_5707 | 0.760622648 | -0.279309348 | 3.548507003 | 2.13340387  | 0.952089026 | NA |
| ASV_16s_5708 | 0.708620196 | 0.107542164  | 3.548590987 | 2.56886165  | 0.921823072 | NA |
| ASV_16s_5709 | 0.727961932 | 0.345103471  | 3.548799544 | 2.182905405 | NA          | NA |
| ASV_16s_5710 | 0.688664789 | -0.341203666 | 3.548462169 | 1.494017169 | NA          | NA |
| ASV_16s_5711 | 0.745584326 | 0.110746562  | 3.548311334 | 2.816602674 | 0.90143382  | NA |
| ASV_16s_5712 | 0.764244891 | -0.441532151 | 3.548330153 | 2.323472974 | 0.939793236 | NA |
| ASV_16s_5713 | 0.70064901  | 0.159410878  | 3.548354372 | 2.726877321 | NA          | NA |
| ASV_16s_5714 | 0.827949253 | -0.373655871 | 3.547614807 | 2.22805964  | 0.946147279 | NA |
| ASV_16s_5715 | 0.713551609 | 0.079277794  | 3.548324581 | 2.745583944 | NA          | NA |
| ASV_16s_5716 | 0.745153288 | 0.243213698  | 3.548164654 | 2.444194842 | 0.931240301 | NA |
| ASV_16s_5717 | 0.733560626 | -0.553891881 | 3.548814972 | 1.639119795 | NA          | NA |
| ASV_16s_5718 | 0.899441161 | -0.851673825 | 3.548308287 | 1.538537984 | NA          | NA |

|              |             |              |             |             |             |    |
|--------------|-------------|--------------|-------------|-------------|-------------|----|
| ASV_16s_5719 | 0.855996909 | 0.232209656  | 3.548586068 | 2.819465728 | 0.901185743 | NA |
| ASV_16s_5720 | 0.864336373 | -0.096789103 | 3.548572589 | 2.615374662 | 0.918161624 | NA |
| ASV_16s_5721 | 0.815249523 | 0.070590133  | 3.548925443 | 2.966908187 | 0.888046519 | NA |
| ASV_16s_5722 | 0.736589201 | -0.116179562 | 3.55005275  | 1.353013139 | NA          | NA |
| ASV_16s_5723 | 1.17304142  | 0.107252819  | 3.548949288 | 2.365291365 | 0.936894713 | NA |
| ASV_16s_5724 | 1.006671449 | 0.717947878  | 3.55034258  | 1.515326589 | 0.981774305 | NA |
| ASV_16s_5725 | 0.599779518 | -1.006014197 | 3.549446785 | 0.84652604  | NA          | NA |
| ASV_16s_5726 | 0.488738325 | 0.216887797  | 3.550636079 | 1.006602917 | 0.994721318 | NA |
| ASV_16s_5727 | 0.580444885 | 0.18089207   | 3.548643929 | 1.559324446 | 0.980184492 | NA |
| ASV_16s_5728 | 1.110758044 | 0.419312336  | 3.549366516 | 1.16138158  | NA          | NA |
| ASV_16s_5729 | 0.920923869 | 1.6442954    | 3.548917206 | 1.375082184 | NA          | NA |
| ASV_16s_5730 | 0.815640177 | 1.692348887  | 3.549107468 | 0.802847684 | NA          | NA |
| ASV_16s_5731 | 0.712904784 | -0.069550949 | 3.549488606 | 2.437432088 | NA          | NA |
| ASV_16s_5732 | 0.531646203 | -0.114087718 | 3.549369466 | 1.758401781 | NA          | NA |
| ASV_16s_5733 | 0.615979232 | -0.028920913 | 3.549852912 | 1.940135863 | NA          | NA |
| ASV_16s_5734 | 1.65641037  | 1.253586922  | 3.549310721 | 1.318831675 | NA          | NA |
| ASV_16s_5735 | 0.665652626 | 1.248591194  | 3.549957822 | 1.02445715  | NA          | NA |
| ASV_16s_5736 | 0.930440869 | 1.272293141  | 3.550230205 | 1.158143201 | 0.991858927 | NA |
| ASV_16s_5737 | 1.071192164 | -0.511994738 | 3.548656506 | 2.474701133 | 0.928990016 | NA |
| ASV_16s_5738 | 0.876690444 | 0.315939295  | 3.550669242 | 1.690625994 | 0.974967889 | NA |
| ASV_16s_5739 | 0.673599589 | -0.198459882 | 3.549390784 | 2.314154802 | NA          | NA |
| ASV_16s_5740 | 0.683594751 | -0.293733269 | 3.549363289 | 2.291046507 | NA          | NA |
| ASV_16s_5742 | 0.740979325 | 0.09792827   | 3.548643285 | 2.559384282 | 0.922559382 | NA |
| ASV_16s_5743 | 0.830502917 | 2.134402648  | 3.548407828 | 0.625875432 | 0.998842734 | NA |
| ASV_16s_5744 | 0.687891474 | -0.020713808 | 3.548357088 | 2.514488945 | NA          | NA |
| ASV_16s_5745 | 0.790062782 | 0.503067353  | 3.325376701 | 2.603958212 | 0.919067628 | NA |
| ASV_16s_5746 | 0.590666103 | 0.714742792  | 3.54828444  | 2.190358583 | NA          | NA |
| ASV_16s_5747 | 0.679616744 | 1.493168169  | 3.5475491   | 1.978238058 | NA          | NA |
| ASV_16s_5748 | 0.910213467 | -0.794472604 | 3.548340759 | 2.169275491 | 0.949880094 | NA |
| ASV_16s_5749 | 0.764727361 | 1.852646063  | 3.547203308 | 1.914967831 | NA          | NA |
| ASV_16s_5750 | 0.808843596 | -0.937319797 | 3.548556287 | 1.982077502 | 0.960825667 | NA |
| ASV_16s_5751 | 0.871789741 | 0.276245581  | 3.165721223 | 2.004289945 | 0.959602548 | NA |
| ASV_16s_5752 | 0.737818559 | -1.366267024 | 2.79151759  | 2.150942042 | 0.9510156   | NA |
| ASV_16s_5753 | 0.789534654 | -0.21896511  | 3.549720682 | 1.642200575 | 0.976974653 | NA |
| ASV_16s_5754 | 0.738778514 | -1.148808444 | 3.548543864 | 1.836386906 | NA          | NA |
| ASV_16s_5755 | 1.10302852  | 1.16843881   | 3.549249804 | 1.432256851 | 0.984562719 | NA |
| ASV_16s_5756 | 0.801363119 | -1.061445733 | 3.547507949 | 1.448017053 | 0.984054945 | NA |
| ASV_16s_5757 | 0.489128581 | 0.701611851  | 3.550501859 | 1.249699564 | 0.989737198 | NA |
| ASV_16s_5758 | 0.491677232 | 1.742071909  | 3.550005941 | 0.632717045 | NA          | NA |
| ASV_16s_5759 | 0.71085195  | -0.069512204 | 3.549490359 | 2.42714187  | NA          | NA |
| ASV_16s_5760 | 0.957493468 | 0.344315984  | 3.549675855 | 2.26280613  | NA          | NA |
| ASV_16s_5761 | 0.959814551 | 0.315939219  | 3.550662144 | 1.736722268 | 0.97296716  | NA |
| ASV_16s_5762 | 0.956449382 | 0.565391243  | 3.550643953 | 3.063927855 | 0.879026046 | NA |
| ASV_16s_5763 | 0.988423749 | 1.132940776  | 3.550184837 | 1.392101425 | 0.985811962 | NA |
| ASV_16s_5764 | 0.862183596 | 0.693888488  | 3.550638412 | 1.616586725 | 0.977996867 | NA |
| ASV_16s_5765 | 0.676564349 | -0.170162225 | 3.549397155 | 2.312942388 | NA          | NA |
| ASV_16s_5766 | 0.680809723 | -0.319623269 | 3.549361118 | 2.262024696 | 0.943927012 | NA |
| ASV_16s_5767 | 0.748973854 | 0.064735286  | 3.549054735 | 2.522337382 | 0.925405666 | NA |
| ASV_16s_5768 | 0.702806695 | 0.766356799  | 3.548577595 | 2.357616197 | NA          | NA |
| ASV_16s_5769 | 0.796286665 | -0.765133875 | 3.548317101 | 1.910858385 | 0.964608867 | NA |
| ASV_16s_5770 | 0.723033466 | 0.633089004  | 3.548164714 | 2.108927043 | NA          | NA |
| ASV_16s_5771 | 0.882505149 | -0.794605645 | 3.548313512 | 2.097083122 | 0.954272022 | NA |
| ASV_16s_5772 | 0.882104662 | -0.178560637 | 3.54896769  | 2.442127031 | 0.931391547 | NA |
| ASV_16s_5773 | 0.860707949 | -0.314883745 | 3.548117746 | 2.422704152 | 0.932804194 | NA |
| ASV_16s_5774 | 0.68296489  | -0.599870301 | 3.550320624 | 1.204603903 | 0.990820507 | NA |
| ASV_16s_5775 | 0.944758286 | -0.105727831 | 3.548135246 | 1.456099807 | NA          | NA |
| ASV_16s_5776 | 1.117092431 | 0.420680519  | 3.54984853  | 0.917673624 | 0.996049554 | NA |
| ASV_16s_5777 | 0.706815293 | -1.042738774 | 3.547877448 | 1.514341102 | NA          | NA |
| ASV_16s_5778 | 0.513408842 | 0.004189352  | 3.549315019 | 2.407050728 | NA          | NA |
| ASV_16s_5779 | 0.241333403 | 0.409948552  | 3.550905312 | 0.668592769 | NA          | NA |
| ASV_16s_5780 | 1.240084229 | 1.081885621  | 3.549299266 | 1.997744672 | NA          | NA |
| ASV_16s_5781 | 1.227148773 | 0.313511733  | 3.546858966 | 2.012099503 | NA          | NA |
| ASV_16s_5782 | 1.071491495 | 0.051124188  | 3.547266716 | 1.953403594 | 0.962374252 | NA |
| ASV_16s_5783 | 0.823193753 | -0.638644048 | 3.548542662 | 2.081108311 | 0.955215016 | NA |
| ASV_16s_5784 | 0.886807566 | 0.250970133  | 3.549470126 | 3.394064813 | 0.846315353 | NA |
| ASV_16s_5785 | 0.665485978 | -0.237466939 | 3.549387995 | 2.297228639 | NA          | NA |
| ASV_16s_5786 | 0.212162572 | -0.170051618 | 3.550631744 | 0.833683551 | NA          | NA |

|              |             |              |             |              |             |    |
|--------------|-------------|--------------|-------------|--------------|-------------|----|
| ASV_16s_5787 | 0.188189758 | -0.16998665  | 3.550647725 | 0.774696958  | NA          | NA |
| ASV_16s_5788 | 0.779197242 | -0.818641175 | 3.548733744 | 1.919248295  | 0.964174177 | NA |
| ASV_16s_5789 | 0.716996006 | 0.149955536  | 3.548741533 | 2.548531446  | 0.923398477 | NA |
| ASV_16s_5790 | 0.807096796 | 0.455845663  | 3.548242777 | 2.295270014  | 0.941709134 | NA |
| ASV_16s_5791 | 0.859984764 | -0.795100499 | 3.548291282 | 1.923681276  | 0.963943314 | NA |
| ASV_16s_5792 | 0.688231416 | 0.824240066  | 3.548271339 | 2.45798101   | NA          | NA |
| ASV_16s_5793 | 0.730274807 | 1.40765895   | 3.547047134 | 1.78937405   | NA          | NA |
| ASV_16s_5794 | 0.87055678  | -0.51018691  | 3.125081454 | 3.00828543   | 0.884234704 | NA |
| ASV_16s_5795 | 0.854494677 | -0.084668742 | 3.547855442 | 2.607866382  | 0.918758011 | NA |
| ASV_16s_5796 | 0.827456255 | -1.192410294 | 3.139714703 | 2.311950164  | 0.940579812 | NA |
| ASV_16s_5797 | 0.938301934 | 3.500590475  | 3.545937634 | 0.351429248  | 0.999829375 | NA |
| ASV_16s_5798 | 0.701372371 | 1.289553031  | 3.548382746 | 1.826782694  | NA          | NA |
| ASV_16s_5799 | 0.766985216 | 0.278985099  | 3.146731063 | 2.214268125  | 0.947035584 | NA |
| ASV_16s_5800 | 1.202659846 | 1.341601588  | 3.549275718 | 1.231246749  | NA          | NA |
| ASV_16s_5801 | 0.474402293 | 29.11901067  | 3.550710075 | -0.365040731 | NA          | NA |
| ASV_16s_5802 | 0.563736047 | 0.730336084  | 3.55068496  | 1.693611619  | NA          | NA |
| ASV_16s_5803 | 0.954393167 | 1.68135002   | 3.548720478 | 1.907155811  | 0.964799767 | NA |
| ASV_16s_5804 | 1.012656391 | 0.132448187  | 3.526778665 | 1.991003745  | 0.96033661  | NA |
| ASV_16s_5805 | 0.762092793 | -0.109270966 | 3.548886279 | 1.658116911  | 0.976325795 | NA |
| ASV_16s_5806 | 0.785864045 | 0.342355636  | 3.549501162 | 2.406475051  | NA          | NA |
| ASV_16s_5807 | 0.911840034 | 0.363424849  | 3.549880727 | 1.289676891  | 0.988713472 | NA |
| ASV_16s_5808 | 1.040756622 | 0.693159989  | 3.550677102 | 2.547011283  | NA          | NA |
| ASV_16s_5809 | 0.857164172 | -0.684589307 | 3.549255203 | 1.164061476  | NA          | NA |
| ASV_16s_5810 | 0.304322919 | 0.398980417  | 3.550658958 | 1.711006789  | NA          | NA |
| ASV_16s_5811 | 0.836123181 | -0.881591286 | 3.548560253 | 1.849130935  | 0.967716657 | NA |
| ASV_16s_5812 | 0.749244152 | 0.315562077  | 3.548423207 | 2.934771865  | NA          | NA |
| ASV_16s_5813 | 0.708924515 | 1.27807762   | 3.547858387 | 2.115822181  | 0.953152494 | NA |
| ASV_16s_5814 | 0.974420024 | 1.205699146  | 3.54931793  | 1.152324621  | NA          | NA |
| ASV_16s_5815 | 0.926064929 | 3.406347717  | 3.546104651 | 0.276680867  | 0.999923953 | NA |
| ASV_16s_5816 | 0.861290552 | -0.834635251 | 3.274420557 | 2.500601616  | 0.927051756 | NA |
| ASV_16s_5817 | 0.791520145 | 0.097329399  | 3.548533498 | 2.742752681  | 0.907736711 | NA |
| ASV_16s_5818 | 0.848037253 | -0.792943664 | 3.548650598 | 2.168824778  | 0.949908173 | NA |
| ASV_16s_5819 | 0.810639481 | -0.716974059 | 3.549249532 | 1.635902024  | 0.977228531 | NA |
| ASV_16s_5820 | 0.800860696 | 0.631512592  | 3.549825715 | 1.700497024  | 0.974546892 | NA |
| ASV_16s_5821 | 0.475847052 | -0.473620019 | 3.550397111 | 1.4543548    | 0.98384796  | NA |
| ASV_16s_5822 | 0.709765084 | -1.397727393 | 3.548527909 | 0.71023967   | 0.998255817 | NA |
| ASV_16s_5823 | 0.664320416 | -0.199929656 | 3.547375011 | 2.065461551  | NA          | NA |
| ASV_16s_5824 | 0.448039904 | 1.91603044   | 3.549891355 | 0.537505741  | NA          | NA |
| ASV_16s_5825 | 0.661983641 | 1.901774438  | 3.549765984 | 0.867536539  | 0.99669209  | NA |
| ASV_16s_5826 | 1.616496867 | 1.253542647  | 3.54932169  | 1.310947325  | NA          | NA |
| ASV_16s_5827 | 0.913259532 | 0.338240209  | 3.55066375  | 1.207724136  | 0.990747963 | NA |
| ASV_16s_5828 | 0.950242544 | 0.325829586  | 3.550682974 | 1.343870213  | 0.987228782 | NA |
| ASV_16s_5829 | 0.934380021 | 0.342809089  | 3.549388483 | 2.648496233  | NA          | NA |
| ASV_16s_5830 | 0.979207898 | 1.122107409  | 3.550210178 | 1.395131956  | 0.985719901 | NA |
| ASV_16s_5831 | 0.73597015  | -0.374618698 | 3.549316107 | 2.263024531  | 0.943860954 | NA |
| ASV_16s_5832 | 0.20955935  | -0.170044178 | 3.550633304 | 0.827567498  | NA          | NA |
| ASV_16s_5833 | 0.699442205 | 0.035376087  | 3.549116715 | 2.338148155  | 0.93878389  | NA |
| ASV_16s_5834 | 0.706135468 | 0.20734089   | 3.548545347 | 2.613446673  | 0.918314961 | NA |
| ASV_16s_5835 | 0.685792393 | -0.075576758 | 3.548479635 | 2.331003358  | 0.939276362 | NA |
| ASV_16s_5836 | 0.716026041 | 0.168859815  | 3.548420735 | 2.695549171  | 0.911666903 | NA |
| ASV_16s_5837 | 0.702213891 | 0.598135786  | 3.548173889 | 2.302103771  | NA          | NA |
| ASV_16s_5838 | 0.690654517 | -0.317116991 | 3.548871717 | 1.973223662  | NA          | NA |
| ASV_16s_5839 | 0.831897032 | -1.321670917 | 3.547124805 | 1.592357753  | 0.978938928 | NA |
| ASV_16s_5840 | 0.725291336 | -0.008578704 | 3.548411549 | 2.474938501  | 0.928972368 | NA |
| ASV_16s_5841 | 0.833541258 | -0.412944742 | 3.396680445 | 1.522557513  | 0.981518428 | NA |
| ASV_16s_5842 | 0.804749083 | 0.612739986  | 3.547479079 | 2.53770323   | 0.924231315 | NA |
| ASV_16s_5843 | 0.785871018 | -0.895408695 | 3.548677229 | 2.059570702  | 0.956469748 | NA |
| ASV_16s_5844 | 0.819328863 | 0.141559218  | 3.547608823 | 2.225924125  | 0.946285328 | NA |
| ASV_16s_5845 | 0.797796807 | -0.798490014 | 3.549154807 | 1.613287047  | 0.978126585 | NA |
| ASV_16s_5846 | 0.722081707 | -0.698456498 | 3.54952955  | 1.692426869  | NA          | NA |
| ASV_16s_5847 | 0.784458397 | 0.789102574  | 3.547014227 | 1.228343938  | NA          | NA |
| ASV_16s_5848 | 0.844020231 | -0.806794384 | 3.548646971 | 1.633005113  | 0.977344748 | NA |
| ASV_16s_5849 | 0.770327333 | -0.138733806 | 3.550021574 | 1.915234523  | 0.964382501 | NA |
| ASV_16s_5850 | 0.838784914 | 0.297396429  | 3.549684704 | 2.672069192  | 0.913592707 | NA |
| ASV_16s_5851 | 0.700450005 | -0.76631317  | 3.547657568 | 1.72502315   | 0.973483316 | NA |
| ASV_16s_5852 | 0.641917762 | 0.166346209  | 3.550266728 | 0.671128801  | 0.998547868 | NA |
| ASV_16s_5853 | 0.712727362 | 0.403535848  | 3.54978923  | 1.087839391  | NA          | NA |

|              |             |              |             |             |             |    |
|--------------|-------------|--------------|-------------|-------------|-------------|----|
| ASV_16s_5854 | 0.747161272 | 0.082287379  | 3.547399794 | 2.221158132 | 0.94659276  | NA |
| ASV_16s_5855 | 0.910386692 | -0.263501006 | 3.548945226 | 1.922992967 | NA          | NA |
| ASV_16s_5856 | 0.352328177 | 0.654553858  | 3.550008518 | 1.362830406 | NA          | NA |
| ASV_16s_5857 | 0.691904179 | 0.235799942  | 3.548573555 | 1.881749996 | 0.966094219 | NA |
| ASV_16s_5858 | 0.461411961 | 1.17932981   | 3.549437391 | 1.296815225 | 0.988524328 | NA |
| ASV_16s_5859 | 0.591248301 | 0.815462459  | 3.549254214 | 1.49628184  | NA          | NA |
| ASV_16s_5860 | 1.003542603 | 0.818727556  | 3.54958162  | 2.346784648 | NA          | NA |
| ASV_16s_5861 | 0.849158974 | 0.315939149  | 3.5506719   | 1.674364118 | 0.975652628 | NA |
| ASV_16s_5862 | 1.007805994 | 0.735246615  | 3.55068247  | 1.736794406 | NA          | NA |
| ASV_16s_5863 | 0.668474225 | -0.278370733 | 3.549378354 | 2.28083988  | NA          | NA |
| ASV_16s_5864 | 0.677790462 | -0.336933354 | 3.549361314 | 2.237287899 | 0.945548616 | NA |
| ASV_16s_5865 | 0.208257739 | -0.170041143 | 3.550634098 | 0.824482985 | NA          | NA |
| ASV_16s_5866 | 0.216830999 | -0.170059897 | 3.550629044 | 0.844456954 | 0.996963342 | NA |
| ASV_16s_5867 | 0.665189877 | 0.053926419  | 3.548744777 | 2.399269082 | NA          | NA |
| ASV_16s_5868 | 0.672661236 | 0.558774992  | 3.548805023 | 2.398523676 | NA          | NA |
| ASV_16s_5869 | 0.704797644 | -0.102697764 | 3.548283375 | 2.441497153 | NA          | NA |
| ASV_16s_5870 | 0.577669469 | 1.852401109  | 3.548216426 | 0.663962559 | 0.998597569 | NA |
| ASV_16s_5871 | 0.848405123 | -0.794492687 | 3.548354889 | 2.066107997 | 0.956090921 | NA |
| ASV_16s_5872 | 0.882823581 | -0.794109764 | 3.548412075 | 2.162626519 | 0.950293488 | NA |
| ASV_16s_5873 | 0.797641958 | -0.889699434 | 3.54856206  | 2.029606421 | 0.958183545 | NA |
| ASV_16s_5874 | 0.841870482 | -0.793801745 | 3.548483915 | 2.129948555 | 0.952299027 | NA |
| ASV_16s_5875 | 0.838560324 | -0.793750014 | 3.548495543 | 2.128934587 | 0.95236056  | NA |
| ASV_16s_5876 | 0.843640181 | -0.793520974 | 3.548535272 | 2.146299729 | 0.951300955 | NA |
| ASV_16s_5877 | 0.830221842 | -0.381730365 | 3.548859146 | 2.301781277 | 0.941269604 | NA |
| ASV_16s_5878 | 0.739687433 | -0.737386603 | 3.549097602 | 1.763302508 | 0.971773253 | NA |
| ASV_16s_5879 | 0.969031407 | 0.487405655  | 3.549490099 | 1.864950071 | 0.966935383 | NA |
| ASV_16s_5880 | 0.787481833 | 1.117160389  | 3.549325912 | 1.895425413 | 0.965400792 | NA |
| ASV_16s_5881 | 0.880946252 | 0.798069626  | 3.547520604 | 2.008486445 | NA          | NA |
| ASV_16s_5882 | 0.562422622 | -0.147365902 | 3.54929558  | 2.029633909 | 0.95818199  | NA |
| ASV_16s_5883 | 0.467669094 | 0.219978546  | 3.550638391 | 1.20689869  | 0.990767189 | NA |
| ASV_16s_5884 | 0.477380806 | 0.219977769  | 3.55063713  | 1.217338271 | 0.990522193 | NA |
| ASV_16s_5885 | 0.633952028 | -0.948864008 | 3.548971101 | 1.581757077 | 0.979343513 | NA |
| ASV_16s_5886 | 0.824411466 | 2.511294303  | 3.548358273 | 0.929801999 | NA          | NA |
| ASV_16s_5887 | 0.698506609 | -0.069539556 | 3.549496852 | 2.412149426 | 0.933565766 | NA |
| ASV_16s_5888 | 0.644819317 | 0.521231912  | 3.550963327 | 1.440520242 | NA          | NA |
| ASV_16s_5889 | 1.596540115 | 1.253522208  | 3.54932738  | 1.306932116 | NA          | NA |
| ASV_16s_5890 | 0.893337246 | -0.540226462 | 3.548866597 | 2.04221729  | 0.957466794 | NA |
| ASV_16s_5891 | 0.874478147 | 0.61712537   | 3.549356991 | 2.380845625 | 0.935799148 | NA |
| ASV_16s_5892 | 0.768389479 | 0.315939326  | 3.550680792 | 1.623502898 | 0.97772352  | NA |
| ASV_16s_5893 | 0.496121647 | 0.734861108  | 3.550792632 | 1.376342659 | NA          | NA |
| ASV_16s_5894 | 0.896395768 | 0.693899451  | 3.550635128 | 1.636364182 | 0.977209958 | NA |
| ASV_16s_5895 | 0.657788203 | -0.260201367 | 3.54939029  | 2.276157844 | NA          | NA |
| ASV_16s_5896 | 0.720951291 | -0.360912087 | 3.54932724  | 2.264498005 | 0.943763529 | NA |
| ASV_16s_5897 | 0.206956128 | -0.170038047 | 3.550634902 | 0.821380554 | NA          | NA |
| ASV_16s_5898 | 0.732507122 | -0.529115341 | 3.549251599 | 2.112237799 | 0.95336775  | NA |
| ASV_16s_5899 | 0.703977701 | 0.120472588  | 3.548678001 | 2.517946404 | 0.925739631 | NA |
| ASV_16s_5900 | 0.660982018 | -0.160259705 | 3.548443506 | 2.109601068 | NA          | NA |
| ASV_16s_5901 | 0.714917567 | 0.480520067  | 3.548548407 | 2.52659482  | 0.925081169 | NA |
| ASV_16s_5902 | 0.76386155  | 0.279163263  | 3.548443181 | 2.83728461  | 0.899635617 | NA |
| ASV_16s_5903 | 0.821848444 | -0.793935114 | 3.548464953 | 2.091908651 | 0.95457862  | NA |
| ASV_16s_5904 | 0.852280032 | -0.793840153 | 3.548497279 | 2.148351615 | 0.951174938 | NA |
| ASV_16s_5905 | 0.675895958 | 1.457398712  | 3.547502018 | 1.888261695 | NA          | NA |
| ASV_16s_5906 | 0.834209028 | -0.921922993 | 3.548339955 | 1.791651629 | 0.970467399 | NA |
| ASV_16s_5907 | 0.828097258 | -0.142301353 | 3.548222567 | 2.565634908 | 0.922074134 | NA |
| ASV_16s_5908 | 0.861871355 | 0.782900592  | 3.3186975   | 2.341466506 | 0.938554482 | NA |
| ASV_16s_5909 | 0.911509018 | 2.281953771  | 3.548083004 | 1.099081613 | 0.993068056 | NA |
| ASV_16s_5910 | 0.874692516 | -0.584308466 | 3.549876501 | 1.7144421   | 0.973945234 | NA |
| ASV_16s_5911 | 0.699563868 | 1.431054476  | 3.549612383 | 0.992091177 | 0.994955511 | NA |
| ASV_16s_5912 | 1.046144591 | 2.456587392  | 3.547922717 | 1.178341919 | NA          | NA |
| ASV_16s_5913 | 0.806999195 | 0.173204044  | 3.329455034 | 0.81207581  | 0.997318754 | NA |
| ASV_16s_5914 | 0.780982384 | -1.030155802 | 3.546849169 | 1.44802458  | NA          | NA |
| ASV_16s_5915 | 0.675132872 | -0.077147452 | 3.547606645 | 2.334181765 | NA          | NA |
| ASV_16s_5916 | 0.978677083 | 3.211279476  | 3.546718294 | 0.385574369 | NA          | NA |
| ASV_16s_5917 | 0.919554828 | 1.256610376  | 3.544961616 | 1.150189418 | 0.992028923 | NA |
| ASV_16s_5918 | 0.682532311 | 0.309795316  | 3.549978357 | 1.880685889 | 0.966147848 | NA |
| ASV_16s_5919 | 0.538078113 | 0.123601621  | 3.550535131 | 1.602469842 | NA          | NA |
| ASV_16s_5920 | 1.031050183 | 0.544964311  | 3.549110164 | 2.421427857 | 0.932896512 | NA |

|              |             |              |             |             |             |    |
|--------------|-------------|--------------|-------------|-------------|-------------|----|
| ASV_16s_5921 | 0.873335447 | 0.693892011  | 3.550637314 | 1.623095799 | 0.977739664 | NA |
| ASV_16s_5922 | 0.891790572 | 0.693898215  | 3.550635556 | 1.633729948 | 0.977315702 | NA |
| ASV_16s_5923 | 0.692083485 | -0.292767954 | 3.549357068 | 2.303866228 | 0.941128508 | NA |
| ASV_16s_5924 | 0.417814455 | 0.219984373  | 3.550645791 | 1.14966453  | NA          | NA |
| ASV_16s_5925 | 0.298383814 | 0.596224857  | 3.550642001 | 0.909770542 | NA          | NA |
| ASV_16s_5926 | 0.810807297 | -0.746281247 | 3.548576194 | 2.015554039 | NA          | NA |
| ASV_16s_5927 | 0.71478257  | -0.449719639 | 3.54875623  | 1.997246732 | 0.959992598 | NA |
| ASV_16s_5928 | 0.862327862 | -0.795158075 | 3.548291806 | 1.900708606 | 0.965130811 | NA |
| ASV_16s_5929 | 0.879847007 | -0.79512379  | 3.548268867 | 1.968960391 | 0.961538325 | NA |
| ASV_16s_5930 | 0.737728803 | 0.019902497  | 3.548265315 | 2.772684155 | NA          | NA |
| ASV_16s_5931 | 0.726755571 | -0.788314807 | 3.548491271 | 1.883775093 | 0.965992027 | NA |
| ASV_16s_5932 | 0.7167761   | -0.706851397 | 3.54822311  | 2.077117953 | 0.955448927 | NA |
| ASV_16s_5933 | 0.804767685 | -0.808595228 | 3.548291687 | 1.509928673 | NA          | NA |
| ASV_16s_5934 | 0.836150384 | -0.794585589 | 3.548348785 | 2.027508543 | NA          | NA |
| ASV_16s_5935 | 0.843761685 | -1.548019845 | 3.548418683 | 1.211606286 | NA          | NA |
| ASV_16s_5936 | 0.873378887 | -0.790397245 | 3.548752752 | 2.012887038 | 0.959123656 | NA |
| ASV_16s_5937 | 0.789494291 | -0.761728558 | 3.548252902 | 2.640465973 | 0.916153802 | NA |
| ASV_16s_5938 | 0.953467161 | -0.451629178 | 3.549387346 | 3.264427861 | 0.859510868 | NA |
| ASV_16s_5939 | 0.956714563 | -0.121893137 | 3.158954712 | 1.371545943 | 0.986426887 | NA |
| ASV_16s_5940 | 0.900932763 | -0.065628163 | 3.549051572 | 2.777279111 | 0.904813124 | NA |
| ASV_16s_5941 | 0.76374429  | 1.317804874  | 3.547974724 | 1.883723208 | NA          | NA |
| ASV_16s_5942 | 0.418875494 | 1.336829234  | 3.550026072 | 0.827797507 | NA          | NA |
| ASV_16s_5943 | 0.445821424 | 0.219980848  | 3.55064143  | 1.182596498 | 0.991322104 | NA |
| ASV_16s_5944 | 0.474608194 | 0.219978067  | 3.550637485 | 1.214372199 | NA          | NA |
| ASV_16s_5945 | 0.622831576 | 0.664986036  | 3.54957145  | 2.082027983 | 0.955161012 | NA |
| ASV_16s_5946 | 0.66602454  | 2.055400586  | 3.549102046 | 1.346611795 | NA          | NA |
| ASV_16s_5947 | 0.707681573 | -0.456905642 | 3.548970744 | 2.126402204 | 0.952514054 | NA |
| ASV_16s_5948 | 0.562012818 | 0.318207799  | 3.550799269 | 0.892546616 | NA          | NA |
| ASV_16s_5949 | 0.192838557 | 0.279455986  | 3.551558569 | 0.676666126 | NA          | NA |
| ASV_16s_5950 | 0.319163374 | 0.284364491  | 3.551229439 | 0.858192881 | NA          | NA |
| ASV_16s_5951 | 1.002631363 | 0.376214502  | 3.550504789 | 0.841802949 | 0.996993568 | NA |
| ASV_16s_5952 | 0.91406367  | 0.315939264  | 3.550665895 | 1.711813875 | 0.974059247 | NA |
| ASV_16s_5953 | 0.204352906 | -0.170031683 | 3.550636542 | 0.815120995 | NA          | NA |
| ASV_16s_5954 | 0.284875013 | 0.220008969  | 3.550678158 | 0.955568048 | NA          | NA |
| ASV_16s_5955 | 0.665798079 | 0.129022753  | 3.548578877 | 2.517324263 | NA          | NA |
| ASV_16s_5956 | 0.659260125 | 0.033473357  | 3.548521463 | 2.464323554 | NA          | NA |
| ASV_16s_5957 | 0.684706254 | 0.18861879   | 3.548378158 | 2.704589151 | NA          | NA |
| ASV_16s_5958 | 0.668402369 | 0.695711415  | 3.54799306  | 2.272675789 | NA          | NA |
| ASV_16s_5959 | 0.696540645 | 0.775246608  | 3.54782092  | 2.358391042 | 0.937377713 | NA |
| ASV_16s_5960 | 0.660478008 | 0.369302253  | 3.548434442 | 1.561555358 | NA          | NA |
| ASV_16s_5961 | 0.741671668 | 1.579576133  | 3.547378661 | 2.109118268 | 0.953554662 | NA |
| ASV_16s_5962 | 0.689209343 | 1.686793392  | 3.547223447 | 1.833398302 | NA          | NA |
| ASV_16s_5963 | 0.815219956 | -0.794234519 | 3.548414813 | 2.049263627 | 0.957063444 | NA |
| ASV_16s_5964 | 0.741411316 | -0.811592239 | 2.908489455 | 2.510814023 | 0.926280559 | NA |
| ASV_16s_5965 | 0.838115835 | -0.793864772 | 3.548472244 | 2.120329791 | 0.952881048 | NA |
| ASV_16s_5966 | 0.834962915 | -0.793577372 | 3.548529864 | 2.133447719 | 0.952086358 | NA |
| ASV_16s_5967 | 0.809777678 | 0.350101992  | 3.548926363 | 2.425825248 | 0.93257817  | NA |
| ASV_16s_5968 | 0.696063832 | -1.043632559 | 3.548186646 | 1.453828391 | 0.983865213 | NA |
| ASV_16s_5969 | 0.725480908 | 1.33780242   | 3.546873277 | 1.759701278 | 0.971936736 | NA |
| ASV_16s_5970 | 0.952700717 | 1.463339185  | 3.136853891 | 2.066773995 | 0.956052228 | NA |
| ASV_16s_5971 | 0.765819157 | 0.270503618  | 3.548554275 | 2.161306772 | NA          | NA |
| ASV_16s_5972 | 0.663255648 | -0.96629254  | 3.336628492 | 1.442475444 | 0.984234616 | NA |
| ASV_16s_5973 | 0.719079514 | 0.847360179  | 3.547747    | 1.581851483 | NA          | NA |
| ASV_16s_5974 | 0.689914905 | -0.075100084 | 3.54986776  | 2.010768448 | 0.959241954 | NA |
| ASV_16s_5975 | 0.860189061 | 0.395196564  | 3.550167809 | 0.617727126 | NA          | NA |
| ASV_16s_5976 | 0.231032587 | 0.406096209  | 3.550955217 | 0.653910293 | NA          | NA |
| ASV_16s_5977 | 0.925332697 | 2.689135454  | 3.548153903 | 1.398524083 | NA          | NA |
| ASV_16s_5978 | 0.657413205 | 0.612553789  | 3.54814599  | 1.50392279  | NA          | NA |
| ASV_16s_5979 | 0.731066479 | -0.495741943 | 3.548461563 | 1.593173529 | NA          | NA |
| ASV_16s_5980 | 0.808878183 | 0.765082675  | 3.550250286 | 1.825821299 | 0.968848812 | NA |
| ASV_16s_5981 | 0.446520489 | -0.452290037 | 3.549682216 | 1.382047535 | NA          | NA |
| ASV_16s_5982 | 1.566604988 | 1.253490887  | 3.549336186 | 1.300813344 | NA          | NA |
| ASV_16s_5983 | 0.894226721 | 0.346050243  | 3.550511006 | 1.11682839  | 0.992717578 | NA |
| ASV_16s_5984 | 0.701413018 | -0.029644582 | 3.550635194 | 1.631859933 | NA          | NA |
| ASV_16s_5985 | 0.804058623 | 0.343431422  | 3.549514654 | 2.423274059 | 0.93276295  | NA |
| ASV_16s_5986 | 0.921837101 | 0.562073278  | 3.550664596 | 2.847520924 | NA          | NA |
| ASV_16s_5987 | 0.95919529  | 0.924792862  | 3.549567357 | 1.892047912 | 0.965572778 | NA |



|              |             |              |             |             |             |    |
|--------------|-------------|--------------|-------------|-------------|-------------|----|
| ASV_16s_5988 | 0.763888951 | 0.809194792  | 3.548908838 | 1.842216307 | 0.968054872 | NA |
| ASV_16s_5989 | 0.947065645 | 0.693910213  | 3.550630698 | 1.664337295 | 0.97606936  | NA |
| ASV_16s_5990 | 0.700479719 | -0.21637727  | 3.549365534 | 2.351928885 | 0.937828354 | NA |
| ASV_16s_5991 | 0.412525664 | 0.219985066  | 3.550646681 | 1.143190969 | NA          | NA |
| ASV_16s_5992 | 0.412525664 | 0.219985066  | 3.550646681 | 1.143190969 | NA          | NA |
| ASV_16s_5993 | 0.412525664 | 0.219985066  | 3.550646681 | 1.143190969 | NA          | NA |
| ASV_16s_5994 | 0.649264429 | 0.149715295  | 3.548852215 | 2.422413052 | NA          | NA |
| ASV_16s_5995 | 0.703663662 | 0.974411597  | 3.548210421 | 2.264200916 | NA          | NA |
| ASV_16s_5996 | 0.712711359 | 0.293513898  | 3.547787965 | 2.162385637 | 0.950308431 | NA |
| ASV_16s_5997 | 0.829213166 | -0.794128069 | 3.548427608 | 2.084979263 | 0.954987477 | NA |
| ASV_16s_5998 | 0.843953452 | -0.794060524 | 3.548434773 | 2.113671624 | 0.953281707 | NA |
| ASV_16s_5999 | 0.794146664 | 0.928686568  | 3.548027575 | 2.406283101 | 0.93398719  | NA |
| ASV_16s_6000 | 0.837993889 | -0.793812744 | 3.548482674 | 2.123840047 | 0.952669085 | NA |
| ASV_16s_6001 | 0.827743362 | -0.502766889 | 3.164744857 | 1.525358557 | 0.981418739 | NA |
| ASV_16s_6002 | 0.864131949 | -2.433717834 | 3.546829348 | 0.819179309 | 0.99724326  | NA |
| ASV_16s_6003 | 0.822404409 | 0.056055647  | 3.548945608 | 2.376195719 | 0.936127652 | NA |
| ASV_16s_6004 | 0.801855121 | -0.526522663 | 3.548504882 | 2.186189944 | NA          | NA |
| ASV_16s_6005 | 0.665226586 | -0.882829456 | 3.548294196 | 1.501340634 | 0.982263211 | NA |
| ASV_16s_6006 | 0.985190578 | 0.901410512  | 3.549504945 | 2.04632515  | 0.957231899 | NA |
| ASV_16s_6007 | 0.292492446 | 0.370433457  | 3.551580689 | 0.479237439 | NA          | NA |
| ASV_16s_6008 | 0.446596717 | 0.25677247   | 3.550638276 | 1.640601952 | 0.977039244 | NA |
| ASV_16s_6009 | 0.468600495 | 0.219978677  | 3.550638269 | 1.207894186 | NA          | NA |
| ASV_16s_6010 | 0.732736456 | 1.069707147  | 3.545932289 | 0.871175607 | NA          | NA |
| ASV_16s_6011 | 0.624918035 | 1.200606925  | 3.547959178 | 1.769843346 | 0.971474938 | NA |
| ASV_16s_6012 | 0.631821392 | 2.035548036  | 3.549196322 | 0.886844191 | 0.996453409 | NA |
| ASV_16s_6013 | 1.042124462 | 1.901742541  | 2.879316338 | 3.958105051 | 0.784590065 | NA |
| ASV_16s_6014 | 0.6390644   | 0.710722447  | 3.550323717 | 1.684815042 | NA          | NA |
| ASV_16s_6015 | 0.382636888 | 0.296595124  | 3.550970778 | 0.919553401 | NA          | NA |
| ASV_16s_6016 | 0.646533215 | 0.241849983  | 3.549543867 | 3.187209748 | 0.867160534 | NA |
| ASV_16s_6017 | 0.870955653 | 0.363327047  | 3.550160701 | 1.314955472 | 0.988034934 | NA |
| ASV_16s_6018 | 0.894905875 | 0.684251859  | 3.549627465 | 2.559008986 | 0.922588472 | NA |
| ASV_16s_6019 | 0.840947734 | 0.315939273  | 3.550672728 | 1.669388691 | 0.975859937 | NA |
| ASV_16s_6020 | 0.685246238 | -0.321292866 | 3.549357501 | 2.26643354  | 0.943635422 | NA |
| ASV_16s_6021 | 0.633225474 | -0.683768142 | 3.549439407 | 1.066427121 | NA          | NA |
| ASV_16s_6022 | 0.409881269 | 0.219985417  | 3.550647135 | 1.139923177 | NA          | NA |
| ASV_16s_6024 | 0.71380466  | -0.082384475 | 3.549055125 | 2.202432652 | 0.947791785 | NA |
| ASV_16s_6025 | 0.677985137 | -0.152940044 | 3.549080554 | 2.083388445 | NA          | NA |
| ASV_16s_6026 | 0.706054794 | 0.555554144  | 3.548660562 | 2.49087845  | NA          | NA |
| ASV_16s_6027 | 0.67479784  | 1.28683549   | 3.547670003 | 2.046291013 | NA          | NA |
| ASV_16s_6028 | 0.846161819 | -0.79401802  | 3.548439532 | 2.119333683 | NA          | NA |
| ASV_16s_6029 | 0.785954987 | -1.096976438 | 3.548314731 | 1.661297777 | 0.976194864 | NA |
| ASV_16s_6030 | 0.776881719 | -1.125841745 | 3.549371143 | 1.192587665 | 0.991096565 | NA |
| ASV_16s_6031 | 0.713517037 | -0.055623735 | 3.550680175 | 1.211721434 | 0.990654505 | NA |
| ASV_16s_6032 | 0.734540816 | -0.067709285 | 3.550217403 | 1.619495237 | 0.977882155 | NA |
| ASV_16s_6033 | 0.853121061 | 0.629193703  | 3.550403818 | 1.908239009 | 0.964743978 | NA |
| ASV_16s_6034 | 0.890496183 | 0.857061586  | 3.549303723 | 2.440855329 | NA          | NA |
| ASV_16s_6035 | 0.474049749 | 0.242318394  | 3.550558028 | 0.74502536  | 0.99796536  | NA |
| ASV_16s_6036 | 0.538333087 | -0.761802617 | 3.548499685 | 1.74655839  | 0.972528785 | NA |
| ASV_16s_6037 | 0.506149124 | 0.579900673  | 3.549889649 | 1.467467221 | NA          | NA |
| ASV_16s_6038 | 0.78160344  | 0.047270363  | 3.548647189 | 2.497112188 | 0.927314363 | NA |
| ASV_16s_6039 | 1.137992586 | 0.326129446  | 3.550622105 | 3.459164145 | 0.839531658 | NA |
| ASV_16s_6040 | 0.718375061 | 0.343263144  | 3.549508931 | 2.368844052 | NA          | NA |
| ASV_16s_6041 | 0.83868065  | 0.349027407  | 3.550669815 | 2.338274237 | 0.938775181 | NA |
| ASV_16s_6042 | 0.628826425 | -0.307974224 | 3.549406541 | 2.19607594  | NA          | NA |
| ASV_16s_6043 | 0.639501374 | -0.346841672 | 3.549392231 | 2.167644539 | NA          | NA |
| ASV_16s_6044 | 0.177798913 | -0.169952928 | 3.550655991 | 0.747005897 | NA          | NA |
| ASV_16s_6045 | 0.279431542 | 0.220010505  | 3.550680139 | 0.945796978 | NA          | NA |
| ASV_16s_6046 | 0.5889284   | 0.344730161  | 3.549078722 | 2.148216803 | 0.951183223 | NA |
| ASV_16s_6047 | 0.683531366 | -0.045997257 | 3.548235372 | 2.115794314 | 0.95315417  | NA |
| ASV_16s_6048 | 0.820904667 | -0.794797304 | 3.548339439 | 1.939742279 | 0.963100015 | NA |
| ASV_16s_6049 | 0.75712482  | -0.527184264 | 3.547988222 | 1.882282688 | NA          | NA |
| ASV_16s_6050 | 0.885261466 | -0.393983951 | 3.550294898 | 1.924894785 | 0.963879973 | NA |
| ASV_16s_6051 | 0.884337296 | 1.092645973  | 3.550304141 | 1.474020565 | 0.983195461 | NA |
| ASV_16s_6052 | 0.754061036 | -1.51079275  | 3.548159213 | 1.26604374  | NA          | NA |
| ASV_16s_6053 | 0.756801933 | 1.119330495  | 3.54862349  | 2.462870894 | NA          | NA |
| ASV_16s_6054 | 0.912848675 | 0.403603298  | 3.549597086 | 1.167601609 | NA          | NA |
| ASV_16s_6055 | 0.442786379 | 0.219981318  | 3.550641878 | 1.179111629 | 0.991399922 | NA |

|              |             |              |             |             |             |    |
|--------------|-------------|--------------|-------------|-------------|-------------|----|
| ASV_16s_6056 | 0.447189805 | 0.219980819  | 3.550641233 | 1.184136006 | 0.991287587 | NA |
| ASV_16s_6057 | 0.657956081 | -0.06965216  | 3.549823051 | 2.169878106 | 0.949842538 | NA |
| ASV_16s_6058 | 0.696375921 | 0.3249864    | 3.551525209 | 0.428824385 | 0.99966763  | NA |
| ASV_16s_6059 | 0.765241859 | 2.606479363  | 3.548073349 | 0.842539658 | NA          | NA |
| ASV_16s_6060 | 0.832995553 | 0.919354906  | 3.550429185 | 1.758711737 | 0.971981562 | NA |
| ASV_16s_6061 | 0.956863259 | 0.119270745  | 3.549451939 | 2.738551712 | 0.908089633 | NA |
| ASV_16s_6062 | 0.671215418 | 0.342132651  | 3.549709298 | 2.218501032 | 0.94676376  | NA |
| ASV_16s_6063 | 0.872877979 | 0.350591736  | 3.550434716 | 1.364885527 | 0.986622592 | NA |
| ASV_16s_6064 | 0.638163718 | -0.1092858   | 3.549455575 | 2.218251286 | NA          | NA |
| ASV_16s_6065 | 0.664855943 | -0.224070586 | 3.549391421 | 2.299464153 | 0.94142621  | NA |
| ASV_16s_6066 | 0.66278647  | -0.227384116 | 3.549392376 | 2.295719342 | 0.941678857 | NA |
| ASV_16s_6067 | 0.64120006  | -0.313186316 | 3.549394709 | 2.209948095 | NA          | NA |
| ASV_16s_6068 | 0.209982761 | 0.220036496  | 3.550714396 | 0.802198247 | NA          | NA |
| ASV_16s_6070 | 0.076230704 | 0.686180329  | 3.551420757 | 0.413145421 | 0.999706486 | NA |
| ASV_16s_6071 | 0.635083156 | 0.060832691  | 3.549180367 | 2.260825855 | NA          | NA |
| ASV_16s_6072 | 0.66820864  | 0.142756885  | 3.548664155 | 2.490600631 | 0.927803182 | NA |
| ASV_16s_6073 | 0.754905891 | 0.041470677  | 3.548559057 | 2.582246612 | 0.920777539 | NA |
| ASV_16s_6074 | 0.69361046  | 0.608124453  | 3.548809632 | 2.33464937  | 0.939025303 | NA |
| ASV_16s_6075 | 0.723305782 | 0.113536372  | 3.548326234 | 2.785673578 | 0.904096139 | NA |
| ASV_16s_6076 | 0.703709195 | 0.203034164  | 3.548339144 | 2.814930856 | NA          | NA |
| ASV_16s_6077 | 0.690179318 | -0.170841021 | 3.547993081 | 2.480252495 | 0.928576716 | NA |
| ASV_16s_6078 | 0.769222685 | -0.024155308 | 3.341734794 | 2.133103839 | 0.95210728  | NA |
| ASV_16s_6079 | 0.764692804 | 0.16652444   | 3.548571341 | 2.732263978 | 0.908616719 | NA |
| ASV_16s_6080 | 0.77639586  | -0.79233597  | 3.548789307 | 2.096872924 | 0.954284498 | NA |
| ASV_16s_6081 | 0.79714532  | -0.786338759 | 3.549147285 | 2.120338552 | 0.952880519 | NA |
| ASV_16s_6082 | 0.694882185 | -0.119907323 | 3.550446636 | 1.83787955  | 0.968265975 | NA |
| ASV_16s_6083 | 0.703021436 | -0.809243168 | 3.549369638 | 1.482727932 | 0.9829016   | NA |
| ASV_16s_6084 | 0.580420955 | -1.277434416 | 3.548060864 | 0.7560238   | NA          | NA |
| ASV_16s_6085 | 0.943032094 | 2.975607353  | 3.050706617 | 0.665212778 | 0.998588981 | NA |
| ASV_16s_6086 | 0.797386455 | -1.394482953 | 3.548383258 | 1.082922072 | NA          | NA |
| ASV_16s_6087 | 0.801300993 | -0.304051319 | 3.547564641 | 2.13382726  | NA          | NA |
| ASV_16s_6088 | 0.695375469 | 1.33885807   | 3.549568138 | 0.990989095 | NA          | NA |
| ASV_16s_6089 | 0.425446357 | 0.219983385  | 3.550644547 | 1.158827747 | 0.99184419  | NA |
| ASV_16s_6090 | 1.070681242 | 1.08634085   | 3.544730082 | 0.832617432 | NA          | NA |
| ASV_16s_6091 | 0.672325212 | -0.268539869 | 3.549640732 | 1.576572265 | NA          | NA |
| ASV_16s_6092 | 0.52598609  | -0.607763132 | 3.549925504 | 0.995864549 | NA          | NA |
| ASV_16s_6093 | 0.874381887 | 1.168358824  | 3.549946623 | 2.255844553 | 0.944334444 | NA |
| ASV_16s_6094 | 0.895459113 | 0.078363354  | 3.549568578 | 2.708383827 | 0.910605994 | NA |
| ASV_16s_6095 | 0.832904306 | 0.315939103  | 3.550673553 | 1.664483466 | 0.976063315 | NA |
| ASV_16s_6096 | 0.891487746 | 1.178313374  | 3.550006308 | 1.294198941 | 0.988593876 | NA |
| ASV_16s_6097 | 0.932135026 | 1.141900926  | 3.550165011 | 1.356283259 | 0.986872799 | NA |
| ASV_16s_6098 | 0.206320566 | 1.140093179  | 3.550992662 | 0.658439888 | 0.998635086 | NA |
| ASV_16s_6099 | 0.652545436 | -0.313072208 | 3.549384998 | 2.227214204 | 0.946201954 | NA |
| ASV_16s_6100 | 0.631842856 | -0.348980466 | 3.549398907 | 2.153036301 | 0.950886582 | NA |
| ASV_16s_6101 | 0.22167917  | -0.652959312 | 3.550638469 | 0.726403667 | NA          | NA |
| ASV_16s_6102 | 0.208087863 | -0.073953611 | 3.550636164 | 1.224841148 | NA          | NA |
| ASV_16s_6103 | 0.654100258 | 0.035958186  | 3.549226207 | 2.261176421 | 0.943983026 | NA |
| ASV_16s_6104 | 0.731074864 | 0.037233141  | 3.548467189 | 2.559924807 | 0.922517477 | NA |
| ASV_16s_6105 | 0.681908916 | 0.428006345  | 3.548388943 | 2.183487876 | 0.948990426 | NA |
| ASV_16s_6106 | 0.694615748 | 0.606415087  | 3.548134696 | 2.484820738 | 0.928235735 | NA |
| ASV_16s_6107 | 0.662150937 | 0.852871363  | 3.548425254 | 2.149124621 | 0.951127419 | NA |
| ASV_16s_6108 | 0.668712393 | 0.040314845  | 3.548320584 | 2.634390502 | NA          | NA |
| ASV_16s_6109 | 0.660370875 | 1.424605005  | 3.547790147 | 1.949783844 | 0.96256731  | NA |
| ASV_16s_6110 | 0.777303928 | -0.79354738  | 3.548550069 | 2.053624107 | 0.956812812 | NA |
| ASV_16s_6111 | 0.83155877  | -0.859307019 | 3.548033121 | 1.75538743  | 0.972131856 | NA |
| ASV_16s_6112 | 0.667032218 | -0.294136296 | 3.549160186 | 1.796926479 | NA          | NA |
| ASV_16s_6113 | 0.806176935 | -1.06563133  | 3.549507036 | 0.92543083  | 0.995943454 | NA |
| ASV_16s_6114 | 0.679749596 | -0.76858815  | 3.549263609 | 1.787424205 | 0.970664257 | NA |
| ASV_16s_6115 | 0.896136662 | 0.014883063  | 3.549111236 | 1.027877169 | NA          | NA |
| ASV_16s_6116 | 0.799428104 | 0.834580653  | 3.548849181 | 1.995430838 | 0.960092828 | NA |
| ASV_16s_6117 | 0.48901675  | 0.612739354  | 3.548219723 | 1.268094453 | NA          | NA |
| ASV_16s_6118 | 0.761514033 | 2.125059353  | 3.549236257 | 0.765278777 | NA          | NA |
| ASV_16s_6119 | 1.146711348 | 0.43970061   | 3.550626603 | 0.687154485 | NA          | NA |
| ASV_16s_6120 | 0.952150455 | 1.339687396  | 3.54937989  | 1.092273179 | NA          | NA |
| ASV_16s_6121 | 0.69343811  | 1.283095105  | 3.549390767 | 1.483670694 | NA          | NA |
| ASV_16s_6122 | 0.827021059 | 0.222309424  | 3.549557819 | 3.338511392 | 0.852022494 | NA |
| ASV_16s_6123 | 0.828771698 | 0.503556775  | 3.548394645 | 2.071519176 | 0.955776018 | NA |

|              |             |              |             |              |             |    |
|--------------|-------------|--------------|-------------|--------------|-------------|----|
| ASV_16s_6124 | 0.430547975 | 0.303637244  | 3.550813953 | 0.959215506  | NA          | NA |
| ASV_16s_6125 | 0.887341702 | 1.212995991  | 3.549863547 | 2.325514477  | 0.939653331 | NA |
| ASV_16s_6126 | 0.724412301 | 0.212027241  | 3.549544136 | 2.657835805  | 0.914750586 | NA |
| ASV_16s_6127 | 0.752307895 | -0.116425048 | 3.549924571 | 2.008021592  | 0.959395057 | NA |
| ASV_16s_6128 | 0.819242426 | 0.343013702  | 3.54944868  | 2.470141806  | 0.929328584 | NA |
| ASV_16s_6129 | 0.688624766 | 0.360430052  | 3.550741473 | 1.606731192  | NA          | NA |
| ASV_16s_6130 | 0.688624766 | 0.360430052  | 3.550741473 | 1.606731192  | NA          | NA |
| ASV_16s_6131 | 0.779828302 | 0.315939164  | 3.550679424 | 1.630962331  | 0.97742649  | NA |
| ASV_16s_6132 | 0.951469013 | 0.735224408  | 3.550688809 | 1.707468975  | NA          | NA |
| ASV_16s_6133 | 0.647914191 | -0.22868094  | 3.549404594 | 2.273120687  | 0.943191668 | NA |
| ASV_16s_6134 | 0.174335298 | -0.169941273 | 3.550658965 | 0.737464569  | NA          | NA |
| ASV_16s_6135 | 0.399303688 | 0.219986812  | 3.55064901  | 1.12663891   | NA          | NA |
| ASV_16s_6136 | 0.405529002 | 0.596288401  | 3.550617683 | 1.065061207  | 0.993709639 | NA |
| ASV_16s_6137 | 0.630514416 | 0.440750306  | 3.548885356 | 2.196808314  | NA          | NA |
| ASV_16s_6138 | 0.665931434 | 0.125813603  | 3.548615343 | 2.498172699  | 0.9272346   | NA |
| ASV_16s_6139 | 0.625384765 | -0.341351434 | 3.548631787 | 1.377661854  | NA          | NA |
| ASV_16s_6140 | 0.829631594 | -0.794275607 | 3.548402874 | 2.069104147  | 0.95591671  | NA |
| ASV_16s_6141 | 0.822393764 | -0.793736901 | 3.548499281 | 2.106371354  | 0.953718916 | NA |
| ASV_16s_6142 | 0.908955863 | 1.007424302  | 3.548174863 | 1.885106784  | 0.965924733 | NA |
| ASV_16s_6143 | 0.846032538 | -0.652558497 | 3.547040228 | 1.537611231  | NA          | NA |
| ASV_16s_6144 | 0.70402418  | -0.093172789 | 3.54976808  | 1.659308549  | NA          | NA |
| ASV_16s_6145 | 0.72212877  | 0.307787833  | 3.550717815 | 1.210515024  | 0.990682773 | NA |
| ASV_16s_6146 | 0.916953322 | 1.166680939  | 3.550056233 | 1.410190066  | 0.985257106 | NA |
| ASV_16s_6147 | 0.76700794  | 0.281916254  | 3.54946366  | 2.495460533  | 0.927438503 | NA |
| ASV_16s_6148 | 0.855199344 | 0.798317709  | 3.549668367 | 1.587129854  | NA          | NA |
| ASV_16s_6149 | 1.09217746  | -1.323025707 | 3.547425774 | 1.971812787  | NA          | NA |
| ASV_16s_6150 | 0.803367472 | 0.108412566  | 3.54792661  | 2.550635201  | 0.923236165 | NA |
| ASV_16s_6151 | 0.467530193 | 0.239573609  | 3.550629804 | 0.803108232  | 0.997412103 | NA |
| ASV_16s_6152 | 0.741151935 | -0.387709261 | 3.549139662 | 1.841622538  | NA          | NA |
| ASV_16s_6153 | 0.430491757 | 0.219982696  | 3.550643749 | 1.164802772  | 0.991714855 | NA |
| ASV_16s_6154 | 0.436321002 | 0.219981908  | 3.550642848 | 1.171630656  | 0.991565494 | NA |
| ASV_16s_6155 | 0.442330201 | 0.219981389  | 3.550641946 | 1.178575455  | 0.991411855 | NA |
| ASV_16s_6156 | 0.764195745 | 0.318038555  | 3.550641826 | 1.325677585  | 0.98773975  | NA |
| ASV_16s_6157 | 0.427715422 | 0.303322431  | 3.550823036 | 0.957009137  | NA          | NA |
| ASV_16s_6158 | 0.851486368 | 1.294193861  | 3.549612019 | 2.021647834  | 0.958632491 | NA |
| ASV_16s_6159 | 0.966625825 | 0.142235833  | 3.548311155 | 2.279577229  | 0.942761525 | NA |
| ASV_16s_6160 | 0.945209348 | 0.735221875  | 3.55068956  | 1.704104114  | NA          | NA |
| ASV_16s_6161 | 0.468214804 | 0.734816448  | 3.550805544 | 1.346904816  | NA          | NA |
| ASV_16s_6162 | 0.886948537 | 0.693896729  | 3.550636011 | 1.630946916  | 0.977427107 | NA |
| ASV_16s_6163 | 0.662361396 | -0.331146082 | 3.549374394 | 2.221736551  | 0.94655498  | NA |
| ASV_16s_6164 | 0.63636932  | -0.335660774 | 3.54939609  | 2.17716494   | 0.949387242 | NA |
| ASV_16s_6165 | 0.630762219 | -0.348562883 | 3.549399926 | 2.151911657  | NA          | NA |
| ASV_16s_6166 | 0.624184339 | -0.351173668 | 3.54940576  | 2.138181323  | 0.951797866 | NA |
| ASV_16s_6167 | 0.679195632 | -0.421248888 | 3.549357585 | 2.097920643  | 0.954222294 | NA |
| ASV_16s_6168 | 0.19524163  | -0.170006505 | 3.550642623 | 0.792651058  | NA          | NA |
| ASV_16s_6169 | 0.19524163  | -0.170006505 | 3.550642623 | 0.792651058  | NA          | NA |
| ASV_16s_6170 | 0.64407431  | 0.030650688  | 3.549372907 | 2.261601917  | 0.943954933 | NA |
| ASV_16s_6171 | 0.172275583 | -0.167146887 | 3.550751212 | 0.742222555  | NA          | NA |
| ASV_16s_6172 | 0.724973471 | 2.228431312  | 3.548222018 | 0.522148359  | NA          | NA |
| ASV_16s_6173 | 0.643657564 | 0.695171115  | 3.548511335 | 2.370981493  | NA          | NA |
| ASV_16s_6174 | 0.768761468 | -0.970927299 | 3.548441217 | 1.619493463  | 0.977882225 | NA |
| ASV_16s_6175 | 0.712502098 | 0.4222393    | 3.546677202 | 2.015018087  | NA          | NA |
| ASV_16s_6176 | 0.781128723 | -0.793487772 | 3.548559371 | 2.063090943  | 0.956265974 | NA |
| ASV_16s_6177 | 0.811628831 | -0.793561441 | 3.548535892 | 2.102171551  | 0.95396945  | NA |
| ASV_16s_6178 | 0.758211559 | -0.791850429 | 3.548893493 | 2.081102894  | 0.955215334 | NA |
| ASV_16s_6179 | 0.675210014 | 0.287961146  | 3.550679993 | 0.917930947  | NA          | NA |
| ASV_16s_6180 | 0.723338293 | -9.141817028 | 3.548224462 | 0.218476558  | 0.999965971 | NA |
| ASV_16s_6181 | 0.524996205 | -0.754941574 | 3.549307041 | 1.251440808  | 0.989693858 | NA |
| ASV_16s_6182 | 0.715446118 | -0.067073662 | 3.550330951 | 1.603419268  | 0.978511835 | NA |
| ASV_16s_6183 | 0.842008531 | -0.13862142  | 3.550370129 | 3.157107459  | 0.870098031 | NA |
| ASV_16s_6184 | 0.999965036 | 2.07105841   | 3.272522762 | 1.361865092  | 0.986710773 | NA |
| ASV_16s_6185 | 0.669880824 | 0.461577948  | 3.547469872 | 2.228317156  | 0.94613062  | NA |
| ASV_16s_6186 | 0.427493906 | 0.219983069  | 3.550644221 | 1.16125097   | 0.991791891 | NA |
| ASV_16s_6187 | 0.512176178 | -8.783108885 | 3.547901664 | -0.697891826 | 1           | NA |
| ASV_16s_6188 | 0.56627833  | 0.433062618  | 3.550921937 | 0.820441118  | NA          | NA |
| ASV_16s_6189 | 0.799093699 | 0.347939992  | 3.550739562 | 0.936980506  | 0.995782093 | NA |
| ASV_16s_6190 | 1.496756358 | 1.253415476  | 3.549358098 | 1.286071767  | NA          | NA |

|              |             |              |             |              |             |    |
|--------------|-------------|--------------|-------------|--------------|-------------|----|
| ASV_16s_6191 | 0.875433265 | 0.885024654  | 3.550068453 | 1.345863904  | 0.987172009 | NA |
| ASV_16s_6192 | 0.96040981  | 0.578819565  | 3.550669224 | 3.564258232  | 0.828373202 | NA |
| ASV_16s_6193 | 0.756927657 | 0.31593922   | 3.55068221  | 1.615806274  | 0.978027589 | NA |
| ASV_16s_6194 | 0.980467032 | 1.187537282  | 3.549582922 | 1.262003857  | 0.989428511 | NA |
| ASV_16s_6195 | 0.465114044 | 0.734811269  | 3.550807074 | 1.343526639  | NA          | NA |
| ASV_16s_6196 | 0.875411803 | 0.693886782  | 3.550637115 | 1.624267374  | 0.977693185 | NA |
| ASV_16s_6197 | 0.997792981 | 1.205748179  | 3.549305884 | 1.159931425  | NA          | NA |
| ASV_16s_6198 | 0.617068376 | -0.141681834 | 3.549460811 | 2.209431865  | NA          | NA |
| ASV_16s_6199 | 0.6458615   | -0.245572623 | 3.549402932 | 2.264716479  | 0.943749076 | NA |
| ASV_16s_6200 | 0.619282328 | -0.298879275 | 3.549416905 | 2.189464748  | 0.948613837 | NA |
| ASV_16s_6201 | 0.188204193 | -0.169984685 | 3.550647721 | 0.774676537  | 0.99769388  | NA |
| ASV_16s_6202 | 0.209355611 | 0.22003681   | 3.550714811 | 0.800686911  | 0.997436937 | NA |
| ASV_16s_6203 | 0.645591599 | 0.246627879  | 3.548747515 | 2.503942675  | 0.926799885 | NA |
| ASV_16s_6204 | 0.722505267 | -0.011313153 | 3.548401318 | 2.555963722  | 0.922824316 | NA |
| ASV_16s_6205 | 0.615646748 | 0.04282284   | 3.548529401 | 1.295389837  | NA          | NA |
| ASV_16s_6206 | 0.769002187 | -0.303332073 | 3.548595428 | 1.536904588  | 0.981004451 | NA |
| ASV_16s_6207 | 0.70877135  | 0.212423456  | 3.549736305 | 1.662074142  | 0.976162844 | NA |
| ASV_16s_6208 | 0.803179561 | -0.748632266 | 3.548767323 | 1.550177726  | 0.980521489 | NA |
| ASV_16s_6209 | 0.850863901 | 1.731170006  | 3.547426113 | 1.134071754  | NA          | NA |
| ASV_16s_6210 | 0.796789539 | 7.596357908  | 3.546399995 | -0.488140796 | 1           | NA |
| ASV_16s_6211 | 0.481384525 | 1.716753619  | 3.548868977 | 0.565952632  | 0.999167371 | NA |
| ASV_16s_6212 | 0.79539127  | 1.84171848   | 3.548960381 | 0.976143832  | NA          | NA |
| ASV_16s_6213 | 0.695329713 | 1.402630539  | 3.549936893 | 0.948173415  | 0.995621813 | NA |
| ASV_16s_6214 | 0.518225652 | -0.147843123 | 3.548909303 | 1.749997728  | NA          | NA |
| ASV_16s_6215 | 0.781382646 | -0.544404568 | 3.549149905 | 1.05937595   | 0.993813022 | NA |
| ASV_16s_6216 | 0.643681788 | -0.561892347 | 3.547785244 | 2.088008647  | NA          | NA |
| ASV_16s_6217 | 0.700310313 | -0.374057956 | 3.548692147 | 2.920331286  | 0.89227309  | NA |
| ASV_16s_6218 | 0.647032977 | 1.872578673  | 3.549084495 | 1.040159998  | NA          | NA |
| ASV_16s_6219 | 0.183967565 | -0.511469316 | 3.551193371 | 0.649760976  | NA          | NA |
| ASV_16s_6220 | 0.885052905 | 0.846620659  | 3.549558722 | 1.575678002  | 0.979573447 | NA |
| ASV_16s_6221 | 0.741686023 | -0.116893349 | 3.549792088 | 2.065677066  | 0.956115947 | NA |
| ASV_16s_6222 | 0.914165042 | 0.49064908   | 3.549450332 | 3.324603868  | NA          | NA |
| ASV_16s_6223 | 0.871554406 | 0.315939239  | 3.550669731 | 1.687541182  | 0.975098625 | NA |
| ASV_16s_6224 | 0.610892351 | -0.295082629 | 3.54942556  | 2.179377499  | NA          | NA |
| ASV_16s_6225 | 0.612693375 | -0.320991333 | 3.549419689 | 2.157178343  | NA          | NA |
| ASV_16s_6226 | 0.203120579 | 0.220040085  | 3.550719052 | 0.785688893  | NA          | NA |
| ASV_16s_6228 | 0.668120311 | 0.370905     | 3.548595061 | 2.363741986  | 0.937003326 | NA |
| ASV_16s_6229 | 0.620366924 | 0.110154785  | 3.548423976 | 2.559474221  | NA          | NA |
| ASV_16s_6230 | 0.902149879 | 2.430687937  | 3.547767856 | 0.566077176  | 0.99916677  | NA |
| ASV_16s_6231 | 0.801571699 | -0.794172885 | 3.548428252 | 2.030862766  | 0.958112435 | NA |
| ASV_16s_6232 | 0.785161692 | -0.253766095 | 3.322676094 | 2.60082353   | 0.919315565 | NA |
| ASV_16s_6233 | 0.733232792 | 1.306725493  | 3.547225639 | 1.718695745  | 0.9737601   | NA |
| ASV_16s_6234 | 0.792960696 | -0.486334882 | 3.314804759 | 2.497241015  | 0.927304676 | NA |
| ASV_16s_6235 | 0.749135398 | -1.033261747 | 3.548292269 | 1.602135109  | NA          | NA |
| ASV_16s_6236 | 0.670379219 | -0.391719812 | 3.549264318 | 1.575036157  | NA          | NA |
| ASV_16s_6237 | 0.392364387 | 1.336490211  | 3.550103593 | 0.806729949  | NA          | NA |
| ASV_16s_6238 | 0.593002281 | 0.126146399  | 3.548546335 | 2.327528059  | 0.939515179 | NA |
| ASV_16s_6239 | 0.339411712 | 0.287945809  | 3.551532048 | 0.619110144  | NA          | NA |
| ASV_16s_6240 | 1.476799607 | 1.253391247  | 3.549364738 | 1.281732798  | NA          | NA |
| ASV_16s_6241 | 1.046272171 | 0.314032017  | 3.547046273 | 1.886946549  | NA          | NA |
| ASV_16s_6242 | 0.836659018 | 0.341699597  | 3.550647091 | 1.146580561  | 0.992105314 | NA |
| ASV_16s_6243 | 1.153229893 | 0.596993154  | 3.549348306 | 2.757809656  | NA          | NA |
| ASV_16s_6244 | 0.670377119 | -0.07438017  | 3.55060351  | 1.573748074  | 0.979646127 | NA |
| ASV_16s_6245 | 0.751270506 | 0.360834139  | 3.550313264 | 1.264794752  | 0.989357705 | NA |
| ASV_16s_6246 | 0.8398804   | 0.693878369  | 3.550640702 | 1.603180178  | 0.978521119 | NA |
| ASV_16s_6247 | 0.632338003 | -0.225081208 | 3.549419153 | 2.249899995  | 0.944724902 | NA |
| ASV_16s_6248 | 0.653786844 | -0.258312188 | 3.549393994 | 2.270916049  | 0.943338163 | NA |
| ASV_16s_6249 | 0.607256414 | -0.244640166 | 3.549438521 | 2.204546752  | NA          | NA |
| ASV_16s_6250 | 0.608113028 | -0.329293521 | 3.549423085 | 2.140521534  | NA          | NA |
| ASV_16s_6251 | 0.605350482 | -0.349074352 | 3.549423926 | 2.111310791  | NA          | NA |
| ASV_16s_6252 | 0.266730108 | 0.220014253  | 3.550685077 | 0.922255128  | NA          | NA |
| ASV_16s_6253 | 0.622418407 | -0.139239788 | 3.549402854 | 2.195474149  | NA          | NA |
| ASV_16s_6254 | 0.615143623 | 0.018268047  | 3.549384459 | 2.147439274  | 0.951230991 | NA |
| ASV_16s_6255 | 0.613086238 | 0.090479128  | 3.549217488 | 2.244872677  | NA          | NA |
| ASV_16s_6256 | 0.662264141 | 0.057729382  | 3.548639902 | 2.415957477  | 0.933291493 | NA |
| ASV_16s_6257 | 0.615929511 | 0.01653659   | 3.548730089 | 2.290796471  | NA          | NA |
| ASV_16s_6258 | 0.636436084 | -0.043664052 | 3.54853115  | 2.311725496  | 0.940595096 | NA |

|              |             |              |             |             |             |    |
|--------------|-------------|--------------|-------------|-------------|-------------|----|
| ASV_16s_6259 | 0.632619025 | 0.308260563  | 3.548571245 | 2.262179455 | 0.94391679  | NA |
| ASV_16s_6260 | 0.611543637 | -0.340578049 | 3.548542178 | 1.465573151 | NA          | NA |
| ASV_16s_6261 | 0.643253667 | 0.051527254  | 3.548425483 | 2.514700909 | NA          | NA |
| ASV_16s_6262 | 0.623531346 | 0.849169104  | 3.548735424 | 2.076902538 | 0.955461536 | NA |
| ASV_16s_6263 | 0.654194617 | 1.056656274  | 3.548161569 | 1.950725029 | NA          | NA |
| ASV_16s_6264 | 0.715032531 | -1.025021889 | 3.548698006 | 1.682819034 | NA          | NA |
| ASV_16s_6265 | 0.789068044 | -0.793471965 | 3.548562299 | 2.0763245   | 0.955495361 | NA |
| ASV_16s_6266 | 0.795303189 | -0.792979739 | 3.548654145 | 2.105410241 | NA          | NA |
| ASV_16s_6267 | 0.789411102 | -0.793076094 | 3.548636678 | 2.094579079 | 0.954420529 | NA |
| ASV_16s_6268 | 0.745002366 | -0.848393064 | 3.54857815  | 1.717887693 | 0.973795328 | NA |
| ASV_16s_6269 | 0.746846281 | -0.791073465 | 3.549057913 | 2.071133954 | 0.955798476 | NA |
| ASV_16s_6270 | 0.694462689 | -0.152324902 | 3.549753146 | 1.43085893  | NA          | NA |
| ASV_16s_6271 | 0.960722387 | 0.929132523  | 3.549605593 | 1.656659312 | NA          | NA |
| ASV_16s_6272 | 0.697870187 | 1.443363455  | 3.54814012  | 1.505726429 | 0.982110749 | NA |
| ASV_16s_6273 | 0.841448125 | 2.956045058  | 3.302771423 | 0.930372003 | 0.995874919 | NA |
| ASV_16s_6274 | 0.582819105 | 0.201028393  | 3.549199762 | 2.210770968 | NA          | NA |
| ASV_16s_6275 | 0.440066318 | -1.467557434 | 3.549000271 | 0.525509592 | NA          | NA |
| ASV_16s_6276 | 0.410286897 | 0.219985271  | 3.550647067 | 1.140385739 | 0.992235366 | NA |
| ASV_16s_6277 | 0.622367023 | -0.069497788 | 3.549576672 | 2.294855304 | NA          | NA |
| ASV_16s_6278 | 0.639214646 | -0.06930265  | 3.549553218 | 2.279558401 | NA          | NA |
| ASV_16s_6279 | 0.192014006 | -0.52170071  | 3.551156935 | 0.664157391 | NA          | NA |
| ASV_16s_6280 | 0.86542113  | 0.700124109  | 3.549523088 | 2.228790983 | 0.94609996  | NA |
| ASV_16s_6281 | 0.746154044 | 0.315939288  | 3.550683582 | 1.608497148 | 0.978314089 | NA |
| ASV_16s_6282 | 0.832718918 | 0.501741965  | 3.550663718 | 3.030805616 | 0.882137903 | NA |
| ASV_16s_6283 | 0.820349201 | 0.693871471  | 3.550642806 | 1.59120101  | 0.978983301 | NA |
| ASV_16s_6284 | 0.595944177 | -0.121551656 | 3.549491543 | 2.161665596 | NA          | NA |
| ASV_16s_6285 | 0.619530858 | -0.152808151 | 3.549453841 | 2.219192754 | 0.946719271 | NA |
| ASV_16s_6286 | 0.596121003 | -0.273022047 | 3.549444768 | 2.171781183 | NA          | NA |
| ASV_16s_6287 | 0.132090045 | -0.169745133 | 3.550707716 | 0.607055822 | NA          | NA |
| ASV_16s_6289 | 0.677233083 | 0.070678688  | 3.548811568 | 2.435557111 | 0.931871004 | NA |
| ASV_16s_6290 | 0.665672504 | -0.018613018 | 3.548894847 | 2.246611956 | 0.944940264 | NA |
| ASV_16s_6291 | 0.617118314 | 0.044223846  | 3.548566009 | 2.398948908 | 0.934512192 | NA |
| ASV_16s_6292 | 0.686479229 | 0.243773564  | 3.548514989 | 2.799145318 | NA          | NA |
| ASV_16s_6293 | 0.703537046 | -0.014061673 | 3.548310162 | 2.616035849 | 0.918109007 | NA |
| ASV_16s_6294 | 0.631492581 | 1.327466064  | 3.547948027 | 2.02122626  | NA          | NA |
| ASV_16s_6295 | 0.769949743 | -0.794395114 | 3.548416655 | 1.922170534 | 0.964022083 | NA |
| ASV_16s_6296 | 0.754982901 | -0.793627957 | 3.548546984 | 2.012794926 | 0.959128803 | NA |
| ASV_16s_6297 | 0.977354467 | 1.205705397  | 3.549316433 | 1.153246473 | NA          | NA |
| ASV_16s_6298 | 0.802199473 | -0.793662138 | 3.548520245 | 2.082631304 | 0.955125566 | NA |
| ASV_16s_6299 | 0.75966079  | -0.793088458 | 3.548645567 | 2.054110072 | 0.956784831 | NA |
| ASV_16s_6300 | 0.775966237 | -0.852673038 | 3.302650348 | 1.886152891 | 0.965871818 | NA |
| ASV_16s_6301 | 0.783278596 | -0.182825651 | 3.546720986 | 1.1810873   | NA          | NA |
| ASV_16s_6302 | 0.571337348 | 0.899719378  | 3.5488847   | 1.642413684 | 0.976966034 | NA |
| ASV_16s_6303 | 0.869126782 | 0.851165967  | 3.069392916 | 2.587183766 | 0.920390225 | NA |
| ASV_16s_6304 | 0.870967628 | -0.444273678 | 3.54994679  | 3.37129339  | 0.848664012 | NA |
| ASV_16s_6305 | 0.83931605  | -0.206764323 | 3.549196179 | 2.334542411 | 0.939032675 | NA |
| ASV_16s_6306 | 1.005333529 | 0.097224674  | 3.547882753 | 2.263066992 | 0.943858147 | NA |
| ASV_16s_6307 | 0.647347687 | 0.150384307  | 3.131234287 | 2.497499015 | 0.927285274 | NA |
| ASV_16s_6308 | 0.646324191 | 0.40350431   | 3.549879192 | 1.056266795 | NA          | NA |
| ASV_16s_6309 | 0.563132479 | 0.412139583  | 3.549342702 | 2.808736552 | 0.902113982 | NA |
| ASV_16s_6310 | 0.754815419 | 1.61632893   | 3.548283723 | 2.122016085 | NA          | NA |
| ASV_16s_6311 | 0.902681864 | 1.39632888   | 3.548765289 | 1.176699534 | 0.991453527 | NA |
| ASV_16s_6312 | 0.667887979 | -0.068919055 | 3.549624301 | 2.205489344 | NA          | NA |
| ASV_16s_6313 | 0.775805556 | -0.072505229 | 3.549164419 | 2.143207383 | 0.951490549 | NA |
| ASV_16s_6314 | 0.799792964 | 0.746013885  | 3.549523176 | 2.740222234 | 0.907949366 | NA |
| ASV_16s_6315 | 0.848511005 | 0.343915601  | 3.549618751 | 2.356284329 | 0.937524805 | NA |
| ASV_16s_6316 | 0.749270548 | 0.315939307  | 3.550683182 | 1.610612423 | 0.978231401 | NA |
| ASV_16s_6317 | 0.885904009 | 1.187172689  | 3.549668264 | 1.224815111 | 0.990344266 | NA |
| ASV_16s_6318 | 0.788498698 | 0.693857803  | 3.550646461 | 1.571033828 | 0.979748087 | NA |
| ASV_16s_6319 | 0.617925233 | -0.12310366  | 3.549468348 | 2.198065947 | NA          | NA |
| ASV_16s_6320 | 0.613686507 | -0.238490003 | 3.549433554 | 2.217004305 | 0.946859958 | NA |
| ASV_16s_6321 | 0.591990045 | -0.231590465 | 3.549456553 | 2.183696952 | NA          | NA |
| ASV_16s_6322 | 0.611550176 | -0.362097522 | 3.549417096 | 2.102770468 | 0.953933766 | NA |
| ASV_16s_6323 | 0.688529993 | -0.344136769 | 3.548459732 | 2.01866098  | 0.958800303 | NA |
| ASV_16s_6324 | 0.63646196  | 0.051906602  | 3.54854358  | 2.437792765 | 0.931708037 | NA |
| ASV_16s_6325 | 0.783379208 | -0.63153478  | 3.547505798 | 2.269711138 | 0.943418146 | NA |
| ASV_16s_6326 | 0.732320179 | -0.792849576 | 3.54869818  | 2.024529138 | 0.958470259 | NA |

|              |             |              |             |             |             |    |
|--------------|-------------|--------------|-------------|-------------|-------------|----|
| ASV_16s_6327 | 0.685491353 | -0.559559849 | 3.548809044 | 1.952189107 | 0.962439087 | NA |
| ASV_16s_6328 | 0.786832701 | -0.995200345 | 2.919518042 | 2.010671597 | 0.959247358 | NA |
| ASV_16s_6329 | 0.776638427 | -0.791951992 | 3.548868177 | 2.101350469 | 0.954018345 | NA |
| ASV_16s_6330 | 0.612265099 | -0.488183591 | 3.550401378 | 1.253863738 | NA          | NA |
| ASV_16s_6331 | 0.805950492 | 0.678683674  | 3.550656735 | 1.749870117 | 0.97238028  | NA |
| ASV_16s_6332 | 0.762902019 | -0.047674935 | 3.549198711 | 2.203794869 | 0.947705037 | NA |
| ASV_16s_6333 | 0.684634065 | 1.438625025  | 3.549114903 | 1.45646472  | NA          | NA |
| ASV_16s_6334 | 0.664699367 | 0.629669416  | 3.548686416 | 1.905257359 | NA          | NA |
| ASV_16s_6335 | 0.564270875 | 0.1620735    | 3.549406152 | 2.226514228 | NA          | NA |
| ASV_16s_6336 | 0.649204679 | -0.231007041 | 3.549207449 | 1.385736108 | NA          | NA |
| ASV_16s_6337 | 0.502006212 | -1.379502119 | 3.54883502  | 0.849523815 | NA          | NA |
| ASV_16s_6338 | 0.303793247 | 1.326267354  | 3.550420987 | 0.723440301 | NA          | NA |
| ASV_16s_6339 | 0.61093872  | -0.079337777 | 3.550603935 | 1.502284586 | 0.982230462 | NA |
| ASV_16s_6340 | 0.410719378 | 0.219985217  | 3.550646993 | 1.140910462 | 0.992224403 | NA |
| ASV_16s_6341 | 0.793514501 | 0.861333527  | 3.54964446  | 1.535793406 | 0.981044558 | NA |
| ASV_16s_6342 | 1.02498371  | 0.739144564  | 3.549513556 | 2.745059879 | 0.907542625 | NA |
| ASV_16s_6343 | 0.927763098 | 0.625409668  | 3.550687598 | 3.002382624 | 0.884781732 | NA |
| ASV_16s_6344 | 0.785948211 | 0.386702827  | 3.55067253  | 2.648194203 | 0.915530815 | NA |
| ASV_16s_6345 | 0.701860176 | 0.315939319  | 3.550689657 | 1.577353074 | 0.97951024  | NA |
| ASV_16s_6346 | 0.632019854 | -0.234061755 | 3.549417463 | 2.247197472 | 0.944901945 | NA |
| ASV_16s_6347 | 0.596812869 | -0.273362302 | 3.549444001 | 2.172667693 | NA          | NA |
| ASV_16s_6348 | 0.826562623 | -0.684506738 | 3.549274584 | 1.152278326 | NA          | NA |
| ASV_16s_6349 | 0.187431965 | -0.169984386 | 3.550648306 | 0.772647406 | NA          | NA |
| ASV_16s_6350 | 0.172577645 | -0.169932367 | 3.550660522 | 0.732541485 | 0.998073018 | NA |
| ASV_16s_6351 | 0.166253529 | -0.169910701 | 3.550666384 | 0.714579815 | NA          | NA |
| ASV_16s_6352 | 0.631380307 | -0.260536617 | 3.548904039 | 1.773816448 | 0.971292861 | NA |
| ASV_16s_6353 | 0.663107035 | -0.978167756 | 3.548600514 | 1.670672937 | 0.975806525 | NA |
| ASV_16s_6354 | 0.765404398 | -0.793597736 | 3.548553827 | 2.034720127 | 0.957893696 | NA |
| ASV_16s_6355 | 0.729437239 | -0.792613335 | 3.54874528  | 2.029303855 | 0.958200661 | NA |
| ASV_16s_6356 | 0.643952572 | 1.538650128  | 3.546744092 | 0.94231003  | NA          | NA |
| ASV_16s_6357 | 0.687700073 | -0.647275997 | 3.549181487 | 1.5749241   | 0.979601857 | NA |
| ASV_16s_6358 | 0.676373449 | 0.219272786  | 3.548570393 | 2.295248994 | NA          | NA |
| ASV_16s_6359 | 0.68875579  | -1.95955466  | 3.547873652 | 0.566725026 | NA          | NA |
| ASV_16s_6360 | 0.409231325 | 0.219985372  | 3.55064725  | 1.13906366  | 0.992262946 | NA |
| ASV_16s_6361 | 0.75905778  | -2.678431138 | 3.546378031 | 0.308257338 | 0.99989034  | NA |
| ASV_16s_6362 | 0.608775745 | -0.06949709  | 3.549594203 | 2.268408682 | NA          | NA |
| ASV_16s_6363 | 0.615217483 | -0.069460515 | 3.549555749 | 2.293230626 | NA          | NA |
| ASV_16s_6364 | 0.628077369 | 0.179311606  | 3.547408658 | 1.406514369 | NA          | NA |
| ASV_16s_6365 | 0.746665848 | 0.54471378   | 3.549251829 | 3.051356762 | 0.880210994 | NA |
| ASV_16s_6366 | 0.91301588  | 0.76198375   | 3.549732276 | 2.794188133 | 0.903366449 | NA |
| ASV_16s_6367 | 0.407887555 | 0.300907646  | 3.550888708 | 0.941123571 | NA          | NA |
| ASV_16s_6368 | 1.036757733 | 0.796718844  | 3.549573773 | 2.745062893 | NA          | NA |
| ASV_16s_6369 | 0.787318081 | 0.143986207  | 3.549487769 | 3.561362682 | NA          | NA |
| ASV_16s_6370 | 0.80415462  | 0.693866239  | 3.550644628 | 1.581040103 | 0.97937071  | NA |
| ASV_16s_6371 | 0.817779835 | 0.693870463  | 3.550643092 | 1.58957727  | 0.979045494 | NA |
| ASV_16s_6372 | 0.656460726 | -0.246222215 | 3.549393857 | 2.280305318 | NA          | NA |
| ASV_16s_6373 | 0.63651812  | -0.296770567 | 3.54940164  | 2.218079915 | 0.946790835 | NA |
| ASV_16s_6374 | 0.619988655 | -0.29426969  | 3.54941713  | 2.194450359 | 0.948298598 | NA |
| ASV_16s_6375 | 0.591666816 | -0.47458725  | 3.549443879 | 1.848563571 | NA          | NA |
| ASV_16s_6376 | 0.16509899  | -0.169906349 | 3.550667503 | 0.711234797 | NA          | NA |
| ASV_16s_6377 | 0.198089883 | -0.170015528 | 3.550640667 | 0.799730977 | NA          | NA |
| ASV_16s_6378 | 0.183680583 | 0.687752946  | 3.550915792 | 0.810252848 | NA          | NA |
| ASV_16s_6379 | 0.66333293  | -0.345630532 | 3.548788265 | 1.957317404 | 0.962164897 | NA |
| ASV_16s_6380 | 0.672355635 | 0.171517313  | 3.548540425 | 2.727512255 | 0.909014134 | NA |
| ASV_16s_6381 | 0.668758794 | 0.435775706  | 3.548337878 | 2.383569772 | 0.935606303 | NA |
| ASV_16s_6382 | 0.790649683 | -0.183351294 | 3.548468113 | 2.063887879 | 0.956219771 | NA |
| ASV_16s_6383 | 0.608976592 | -0.403419712 | 3.548896309 | 1.863653793 | NA          | NA |
| ASV_16s_6384 | 0.624666235 | 1.269531638  | 3.548398471 | 2.143235001 | NA          | NA |
| ASV_16s_6385 | 0.741974434 | 0.236204418  | 3.549016217 | 2.856557462 | 0.897947117 | NA |
| ASV_16s_6386 | 0.719900725 | -0.299796855 | 3.302280327 | 2.238350809 | 0.945479442 | NA |
| ASV_16s_6387 | 0.869605174 | -2.735887314 | 3.545175536 | 0.512211375 | 0.999400528 | NA |
| ASV_16s_6388 | 0.727866606 | -0.77587407  | 3.549262826 | 2.04473856  | 0.957322706 | NA |
| ASV_16s_6389 | 0.665811898 | -0.098991524 | 3.549723016 | 1.795403006 | 0.970292083 | NA |
| ASV_16s_6390 | 0.908059875 | 1.804467762  | 2.610875084 | 2.428549309 | 0.932380593 | NA |
| ASV_16s_6391 | 0.729853679 | -0.380610476 | 3.549151388 | 1.663340166 | NA          | NA |
| ASV_16s_6392 | 0.654456693 | -0.057984368 | 3.547572637 | 1.246695656 | NA          | NA |
| ASV_16s_6393 | 0.638783933 | 1.250283072  | 3.548840574 | 0.674497979 | NA          | NA |

|              |             |              |             |             |             |    |
|--------------|-------------|--------------|-------------|-------------|-------------|----|
| ASV_16s_6394 | 0.749645051 | 0.90013787   | 3.550423355 | 1.405618122 | 0.985398565 | NA |
| ASV_16s_6395 | 0.737001787 | 0.315939201  | 3.550684778 | 1.602195313 | 0.97855934  | NA |
| ASV_16s_6396 | 0.713330343 | 0.315939196  | 3.550688012 | 1.585586489 | 0.979197892 | NA |
| ASV_16s_6397 | 0.69889818  | 0.315939351  | 3.550690091 | 1.575191254 | 0.979591792 | NA |
| ASV_16s_6398 | 0.768870204 | 0.69385163   | 3.550648864 | 1.558196389 | 0.980226238 | NA |
| ASV_16s_6399 | 0.78805699  | 0.693854565  | 3.550646514 | 1.570738219 | 0.979759173 | NA |
| ASV_16s_6400 | 0.601709084 | -0.188900013 | 3.54945837  | 2.201962523 | 0.947821706 | NA |
| ASV_16s_6401 | 0.60459993  | -0.370276556 | 3.549423611 | 2.079349765 | NA          | NA |
| ASV_16s_6402 | 0.270371606 | 0.11625577   | 3.550650365 | 1.548701756 | 0.980575549 | NA |
| ASV_16s_6403 | 0.647953975 | -0.004763591 | 3.549335697 | 2.174048427 | 0.949582232 | NA |
| ASV_16s_6404 | 0.651915761 | 0.140061358  | 3.548453209 | 2.58453311  | NA          | NA |
| ASV_16s_6405 | 0.602758541 | 0.591255927  | 3.54851453  | 2.18248104  | NA          | NA |
| ASV_16s_6406 | 0.698635661 | -0.473932576 | 3.548616795 | 1.933623713 | 0.963422545 | NA |
| ASV_16s_6407 | 0.620702899 | -0.342472711 | 3.548137941 | 1.996778668 | 0.960018447 | NA |
| ASV_16s_6408 | 0.617707315 | 1.151502364  | 3.548369897 | 2.009116988 | NA          | NA |
| ASV_16s_6409 | 0.786891766 | -0.794696466 | 3.548380885 | 1.882178948 | 0.966072587 | NA |
| ASV_16s_6410 | 0.757582954 | -0.793896385 | 3.548518375 | 2.002140957 | 0.959721777 | NA |
| ASV_16s_6411 | 0.577203575 | 0.316121582  | 3.547692842 | 1.363491799 | 0.986663326 | NA |
| ASV_16s_6412 | 0.66227367  | -0.923530213 | 3.549238848 | 1.296273451 | NA          | NA |
| ASV_16s_6413 | 0.76866492  | -0.840312594 | 3.549145961 | 1.219633863 | 0.990467784 | NA |
| ASV_16s_6414 | 0.726748002 | -0.780809148 | 3.549222006 | 2.045655232 | 0.957270254 | NA |
| ASV_16s_6415 | 0.684247588 | -0.440752314 | 3.55001784  | 1.075216327 | 0.993522257 | NA |
| ASV_16s_6416 | 0.630323627 | 1.250045427  | 3.549703887 | 1.308827957 | 0.988201649 | NA |
| ASV_16s_6417 | 0.776996037 | 0.682546127  | 3.550585544 | 1.844498138 | 0.967943482 | NA |
| ASV_16s_6418 | 0.633184029 | -0.192372205 | 3.549371944 | 1.63171348  | 0.977396453 | NA |
| ASV_16s_6419 | 0.785399637 | 0.85977211   | 3.550485266 | 1.522035695 | 0.981536964 | NA |
| ASV_16s_6420 | 0.628616679 | 0.403494796  | 3.54990637  | 1.047298769 | NA          | NA |
| ASV_16s_6421 | 0.401797808 | 0.219986385  | 3.550648561 | 1.129751576 | 0.992455457 | NA |
| ASV_16s_6422 | 0.605661113 | -0.069455223 | 3.549566123 | 2.27736362  | NA          | NA |
| ASV_16s_6423 | 0.52616478  | -0.781367469 | 3.54909134  | 1.404402388 | NA          | NA |
| ASV_16s_6424 | 0.622508736 | -0.069058195 | 3.549609835 | 2.192995045 | NA          | NA |
| ASV_16s_6425 | 1.416929353 | 1.253310795  | 3.549385776 | 1.268354216 | NA          | NA |
| ASV_16s_6426 | 0.679848318 | 0.339291287  | 3.550187444 | 0.893395632 | 0.996369946 | NA |
| ASV_16s_6427 | 0.55458764  | -0.06960122  | 3.549924939 | 2.015105633 | NA          | NA |
| ASV_16s_6428 | 1.025181912 | -0.126292015 | 3.548650458 | 2.363584852 | NA          | NA |
| ASV_16s_6429 | 0.879000457 | 0.344030263  | 3.549628856 | 2.24322909  | 0.945161383 | NA |
| ASV_16s_6430 | 0.860782371 | 1.153512934  | 3.55013038  | 1.306281666 | 0.988270506 | NA |
| ASV_16s_6431 | 0.583837177 | -0.302958365 | 3.549451398 | 2.128035909 | 0.952415061 | NA |
| ASV_16s_6432 | 0.183527133 | -0.16997249  | 3.550651328 | 0.762362301 | NA          | NA |
| ASV_16s_6433 | 0.587467909 | 6.65E-05     | 3.549459758 | 2.146797732 | NA          | NA |
| ASV_16s_6434 | 0.653919155 | -0.515259684 | 3.549327518 | 2.009743148 | 0.959299138 | NA |
| ASV_16s_6435 | 0.050077316 | 0.618664388  | 3.551840832 | 0.299597691 | 0.999900416 | NA |
| ASV_16s_6436 | 0.647155524 | -0.044172647 | 3.548901938 | 2.174896358 | 0.949529219 | NA |
| ASV_16s_6437 | 0.639612806 | 0.357792658  | 3.549244974 | 2.274155426 | 0.943122844 | NA |
| ASV_16s_6438 | 0.654759516 | -0.373704603 | 3.548607356 | 1.879653183 | 0.966199849 | NA |
| ASV_16s_6439 | 0.602415657 | -0.290792331 | 3.549209976 | 1.868898259 | NA          | NA |
| ASV_16s_6440 | 0.782601984 | -0.794930653 | 3.548418943 | 1.740445797 | 0.972801685 | NA |
| ASV_16s_6441 | 0.763752469 | -0.79464377  | 3.548412941 | 1.832894208 | 0.968507679 | NA |
| ASV_16s_6442 | 0.650404628 | -0.532079965 | 3.548644789 | 1.881496428 | 0.966107003 | NA |
| ASV_16s_6443 | 0.720648737 | -0.794333685 | 3.548478011 | 1.812137944 | 0.969502837 | NA |
| ASV_16s_6444 | 0.73969837  | -0.793649383 | 3.548514377 | 1.959322864 | 0.962057374 | NA |
| ASV_16s_6445 | 0.771632772 | -0.793992635 | 3.54846681  | 1.995638736 | 0.96008136  | NA |
| ASV_16s_6446 | 0.768839953 | -0.793087186 | 3.548640473 | 2.066385128 | 0.956074823 | NA |
| ASV_16s_6447 | 0.721469242 | -0.792725165 | 3.548726669 | 2.013756882 | 0.959075031 | NA |
| ASV_16s_6448 | 0.719279641 | 0.809777984  | 3.54812574  | 2.317422108 | 0.940206937 | NA |
| ASV_16s_6449 | 0.706749991 | -0.081099514 | 3.550754211 | 0.990326617 | NA          | NA |
| ASV_16s_6450 | 0.717348466 | -0.730068489 | 3.548774229 | 2.064265953 | 0.956197843 | NA |
| ASV_16s_6451 | 0.781034126 | 0.71397052   | 3.549940452 | 2.018425525 | 0.958813516 | NA |
| ASV_16s_6452 | 0.589425036 | -0.160324227 | 3.549889458 | 2.235589561 | NA          | NA |
| ASV_16s_6453 | 0.833804173 | -0.967055584 | 2.956607971 | 1.349077752 | 0.987080167 | NA |
| ASV_16s_6454 | 0.723076028 | -0.321658163 | 3.549784448 | 1.464150487 | NA          | NA |
| ASV_16s_6455 | 0.828669133 | -0.318772757 | 3.5469978   | 1.445526353 | 0.984135851 | NA |
| ASV_16s_6456 | 0.730883834 | 0.76752849   | 3.547929902 | 2.472583107 | NA          | NA |
| ASV_16s_6457 | 0.510870859 | -0.132746371 | 3.548579985 | 1.628994253 | NA          | NA |
| ASV_16s_6458 | 1.117189162 | 0.314517678  | 3.550622582 | 3.437993242 | 0.841748874 | NA |
| ASV_16s_6459 | 0.881083355 | 0.344088857  | 3.54964295  | 2.228541186 | NA          | NA |
| ASV_16s_6460 | 0.696694868 | 0.459972447  | 3.550651663 | 2.545927822 | 0.923599129 | NA |

|              |             |              |             |             |             |    |
|--------------|-------------|--------------|-------------|-------------|-------------|----|
| ASV_16s_6461 | 0.711275949 | 0.31593925   | 3.550688304 | 1.584108706 | 0.979254159 | NA |
| ASV_16s_6462 | 0.713039202 | 0.581972145  | 3.550665225 | 2.655193013 | 0.91496478  | NA |
| ASV_16s_6463 | 0.437207201 | 0.734760255  | 3.550821817 | 1.312072414 | NA          | NA |
| ASV_16s_6464 | 0.80146061  | 0.693864656  | 3.550644494 | 1.579312981 | 0.97943614  | NA |
| ASV_16s_6465 | 0.582952378 | -0.221524653 | 3.549468419 | 2.170635024 | NA          | NA |
| ASV_16s_6466 | 0.580494383 | -0.285689675 | 3.549458187 | 2.136829359 | 0.951880356 | NA |
| ASV_16s_6467 | 0.59748496  | -0.314373846 | 3.549435574 | 2.139506178 | 0.951716958 | NA |
| ASV_16s_6468 | 0.586378832 | -0.683511821 | 3.549495696 | 1.041601573 | NA          | NA |
| ASV_16s_6469 | 0.192141088 | 0.220046254  | 3.550727191 | 0.758236928 | NA          | NA |
| ASV_16s_6470 | 0.646047159 | -0.275301961 | 3.549290212 | 1.900814073 | 0.965125409 | NA |
| ASV_16s_6471 | 0.6134361   | 0.016298634  | 3.548909926 | 2.208460435 | 0.94740736  | NA |
| ASV_16s_6472 | 0.589266685 | 0.129748386  | 3.548793802 | 2.343943382 | NA          | NA |
| ASV_16s_6473 | 0.681552733 | -0.310533374 | 3.548632438 | 1.967587946 | 0.961612477 | NA |
| ASV_16s_6474 | 0.585469649 | -0.340119535 | 3.548554274 | 1.480996869 | 0.982960264 | NA |
| ASV_16s_6475 | 0.674653833 | 0.226145121  | 3.548501226 | 2.784681997 | 0.904180956 | NA |
| ASV_16s_6476 | 0.67050579  | -0.66710162  | 3.548691071 | 1.868723385 | NA          | NA |
| ASV_16s_6477 | 0.654861292 | 0.089142055  | 3.548458965 | 2.63765244  | 0.916380073 | NA |
| ASV_16s_6478 | 0.7586745   | -0.921701622 | 3.548243635 | 1.687609377 | 0.975095739 | NA |
| ASV_16s_6479 | 0.7316914   | -0.792745821 | 3.54871911  | 2.027784055 | 0.958286577 | NA |
| ASV_16s_6480 | 0.725266816 | -0.792466184 | 3.547694895 | 2.029694886 | 0.95817854  | NA |
| ASV_16s_6481 | 0.584945879 | -0.893584232 | 3.548847266 | 1.658169923 | 0.976323617 | NA |
| ASV_16s_6482 | 0.629012145 | 0.23794949   | 3.548783486 | 2.495694131 | NA          | NA |
| ASV_16s_6483 | 0.722985618 | -0.791849153 | 3.548901974 | 2.037956407 | 0.957709701 | NA |
| ASV_16s_6484 | 0.75659568  | -0.463855868 | 3.548207107 | 2.133837214 | 0.952062655 | NA |
| ASV_16s_6485 | 0.76724103  | -0.71775083  | 3.549259231 | 1.604092626 | 0.978485674 | NA |
| ASV_16s_6486 | 0.753325214 | 0.327186635  | 3.550744161 | 0.924736946 | 0.995953019 | NA |
| ASV_16s_6487 | 0.690926745 | 1.083138203  | 3.064759292 | 2.316648242 | 0.940259743 | NA |
| ASV_16s_6488 | 0.664027261 | 2.344876853  | 3.549093332 | 0.622669279 | NA          | NA |
| ASV_16s_6489 | 1.032959377 | 1.341256907  | 3.549355164 | 1.182094905 | NA          | NA |
| ASV_16s_6490 | 0.991363968 | -2.278301098 | 3.546871823 | 0.600090731 | NA          | NA |
| ASV_16s_6491 | 0.20601632  | 0.395982945  | 3.551094977 | 0.615600154 | NA          | NA |
| ASV_16s_6492 | 0.293317618 | 1.320607187  | 3.550453633 | 0.711435132 | NA          | NA |
| ASV_16s_6493 | 0.403224673 | 0.219986175  | 3.550648306 | 1.131540118 | 0.992418719 | NA |
| ASV_16s_6494 | 0.420538906 | 0.219984058  | 3.550645346 | 1.152878389 | NA          | NA |
| ASV_16s_6495 | 0.614330478 | -0.062307428 | 3.549998011 | 1.805651033 | NA          | NA |
| ASV_16s_6496 | 0.770353295 | 0.718152704  | 3.549679204 | 2.156937123 | 0.950645793 | NA |
| ASV_16s_6497 | 0.28280299  | 0.279948019  | 3.551367939 | 0.815940693 | NA          | NA |
| ASV_16s_6498 | 0.804486806 | 0.377561061  | 3.548414279 | 2.116280924 | 0.953124907 | NA |
| ASV_16s_6499 | 0.967313706 | 0.195517453  | 3.549648725 | 2.669274371 | 0.913820634 | NA |
| ASV_16s_6500 | 0.718836051 | 0.790981883  | 3.548603887 | 2.004747922 | NA          | NA |
| ASV_16s_6501 | 0.763892871 | 0.709677362  | 3.549527872 | 2.21212589  | NA          | NA |
| ASV_16s_6502 | 0.718296686 | 0.345354512  | 3.550548069 | 1.296259908 | 0.988539111 | NA |
| ASV_16s_6503 | 1.04310075  | 0.959338214  | 3.549487322 | 2.593353463 | NA          | NA |
| ASV_16s_6504 | 0.634259653 | 0.360426109  | 3.550754146 | 1.564836266 | NA          | NA |
| ASV_16s_6505 | 0.896784338 | 0.68698775   | 3.55069257  | 2.460345205 | NA          | NA |
| ASV_16s_6506 | 0.779503704 | 0.31593922   | 3.550679467 | 1.630695159 | 0.977437169 | NA |
| ASV_16s_6507 | 0.814884546 | 0.693868332  | 3.550643415 | 1.587753096 | 0.979115236 | NA |
| ASV_16s_6508 | 0.570547425 | -0.011218283 | 3.549591888 | 1.978874684 | NA          | NA |
| ASV_16s_6509 | 0.567455275 | -0.197061758 | 3.549492302 | 2.145395609 | NA          | NA |
| ASV_16s_6510 | 0.574061676 | -0.221322132 | 3.54947807  | 2.155577632 | NA          | NA |
| ASV_16s_6511 | 0.574118716 | -0.272037665 | 3.549468088 | 2.135465425 | NA          | NA |
| ASV_16s_6512 | 0.577248559 | -0.359692683 | 3.549452399 | 2.050587835 | NA          | NA |
| ASV_16s_6513 | 0.608563449 | 0.29795926   | 3.549352131 | 2.232456472 | NA          | NA |
| ASV_16s_6514 | 0.614488379 | -0.438615046 | 3.54933634  | 1.872147109 | 0.966576475 | NA |
| ASV_16s_6515 | 0.598918079 | 0.088201183  | 3.548552326 | 2.41641218  | 0.933258705 | NA |
| ASV_16s_6516 | 0.632221773 | -1.098119864 | 3.549023478 | 1.629955557 | 0.977466714 | NA |
| ASV_16s_6517 | 0.655537508 | 0.034303555  | 3.548540584 | 2.490813081 | 0.927787259 | NA |
| ASV_16s_6518 | 0.580684345 | 0.009823614  | 3.548508421 | 2.347398049 | NA          | NA |
| ASV_16s_6519 | 0.606174177 | 1.108666243  | 3.548029082 | 2.038446621 | 0.957681793 | NA |
| ASV_16s_6520 | 0.730634057 | -0.793694544 | 3.548535728 | 1.954309374 | 0.962325857 | NA |
| ASV_16s_6521 | 0.74518227  | -0.793865849 | 3.548499141 | 1.959660471 | 0.962039257 | NA |
| ASV_16s_6522 | 0.702204869 | 0.009477815  | 3.548464497 | 2.621414214 | 0.917680415 | NA |
| ASV_16s_6523 | 0.666271955 | 0.082592783  | 3.548675349 | 2.530494756 | 0.924783327 | NA |
| ASV_16s_6524 | 0.64627525  | -0.598658851 | 3.547941004 | 1.644030702 | 0.976900578 | NA |
| ASV_16s_6525 | 0.765333353 | -0.883159076 | 3.347710991 | 1.653646615 | 0.976509094 | NA |
| ASV_16s_6526 | 0.700381729 | -0.619001548 | 3.547654735 | 1.842939441 | 0.968019595 | NA |
| ASV_16s_6527 | 0.745948248 | -0.636361386 | 3.549059478 | 2.497253003 | 0.927303775 | NA |



|              |             |              |             |             |             |    |
|--------------|-------------|--------------|-------------|-------------|-------------|----|
| ASV_16s_6528 | 0.774030042 | -0.20108047  | 3.298629615 | 2.891921251 | 0.89481709  | NA |
| ASV_16s_6529 | 0.873549715 | 1.777702724  | 3.548638494 | 1.808215197 | NA          | NA |
| ASV_16s_6530 | 0.652854056 | -0.08642388  | 3.549717923 | 1.88420632  | 0.965970244 | NA |
| ASV_16s_6531 | 0.870367655 | 0.431813686  | 3.548929681 | 2.058850295 | 0.956511386 | NA |
| ASV_16s_6532 | 0.719310503 | -0.10589752  | 3.55056817  | 1.690665947 | 0.974966193 | NA |
| ASV_16s_6533 | 0.799849663 | 1.28970092   | 3.548012908 | 1.93907138  | 0.963135457 | NA |
| ASV_16s_6534 | 0.689348385 | 2.187547945  | 3.549292489 | 0.712701401 | NA          | NA |
| ASV_16s_6535 | 1.025581096 | 1.341239358  | 3.549359212 | 1.179778365 | NA          | NA |
| ASV_16s_6536 | 0.449359834 | 0.244522673  | 3.550799857 | 0.481871836 | 0.999510189 | NA |
| ASV_16s_6537 | 0.594410455 | -0.069555999 | 3.549700007 | 2.183815635 | 0.948969812 | NA |
| ASV_16s_6538 | 0.709673748 | 2.68636517   | 3.548114875 | 0.436827281 | NA          | NA |
| ASV_16s_6539 | 0.630786357 | -0.069295565 | 3.549557122 | 2.269703255 | NA          | NA |
| ASV_16s_6540 | 0.956537855 | 0.061915163  | 3.548623412 | 2.317288957 | 0.940216025 | NA |
| ASV_16s_6541 | 0.800578766 | 1.001959014  | 3.549775979 | 1.965533848 | 0.961723312 | NA |
| ASV_16s_6542 | 0.819701464 | 1.055723128  | 3.550390956 | 1.353175973 | 0.986962471 | NA |
| ASV_16s_6543 | 0.870093374 | 0.735186804  | 3.550699412 | 1.661893215 | NA          | NA |
| ASV_16s_6544 | 0.831857167 | 0.693878016  | 3.550641557 | 1.598255318 | NA          | NA |
| ASV_16s_6545 | 0.611485814 | -0.237302831 | 3.549435959 | 2.213683679 | 0.947073059 | NA |
| ASV_16s_6546 | 0.563404174 | -0.225185425 | 3.549489006 | 2.136490568 | NA          | NA |
| ASV_16s_6547 | 0.569905665 | -0.391637919 | 3.549460226 | 1.988103935 | NA          | NA |
| ASV_16s_6549 | 0.604979339 | 0.078079676  | 3.548757529 | 2.338969777 | 0.938727129 | NA |
| ASV_16s_6550 | 0.615083191 | 0.699162115  | 3.548363055 | 2.252775862 | 0.944536183 | NA |
| ASV_16s_6551 | 0.721694776 | -0.794194988 | 3.54848435  | 1.854524003 | 0.96745148  | NA |
| ASV_16s_6552 | 0.710997172 | -0.794178198 | 3.548496964 | 1.824513067 | 0.96891168  | NA |
| ASV_16s_6553 | 0.670704713 | 1.862994311  | 3.547358747 | 1.818407948 | 0.96920412  | NA |
| ASV_16s_6554 | 0.790817998 | -0.793890953 | 3.548492606 | 2.051418829 | 0.956939666 | NA |
| ASV_16s_6555 | 0.661639181 | 0.104043447  | 3.548538533 | 2.612694695 | 0.91837473  | NA |
| ASV_16s_6556 | 0.700263202 | -0.792954155 | 3.548691609 | 1.969242957 | 0.961523049 | NA |
| ASV_16s_6557 | 0.7262735   | -0.07220924  | 3.54790799  | 1.428352134 | 0.984686996 | NA |
| ASV_16s_6558 | 0.615673755 | -0.598821852 | 3.549323049 | 1.533402941 | NA          | NA |
| ASV_16s_6559 | 0.822532319 | 0.364498127  | 3.549008496 | 1.513656125 | 0.981833116 | NA |
| ASV_16s_6560 | 0.776234799 | 1.518048567  | 3.328694298 | 1.853508433 | 0.967501508 | NA |
| ASV_16s_6561 | 0.657888524 | -0.238806205 | 3.549301291 | 2.176848227 | NA          | NA |
| ASV_16s_6562 | 0.65765785  | -1.952270354 | 3.547975156 | 0.554010943 | NA          | NA |
| ASV_16s_6563 | 0.203073229 | 0.39471523   | 3.551113446 | 0.610839774 | NA          | NA |
| ASV_16s_6564 | 0.393556451 | 0.219987577  | 3.550650074 | 1.11921585  | 0.992669593 | NA |
| ASV_16s_6565 | 0.436675914 | 0.596302093  | 3.550612852 | 1.102534323 | NA          | NA |
| ASV_16s_6566 | 0.8703143   | 0.392249167  | 3.551606787 | 0.56003129  | 0.999195636 | NA |
| ASV_16s_6567 | 0.700238807 | 0.649293567  | 3.548439149 | 2.813808401 | 0.901675671 | NA |
| ASV_16s_6568 | 0.72647203  | 0.397740841  | 3.548280268 | 1.633399941 | NA          | NA |
| ASV_16s_6569 | 0.785208773 | 0.234030528  | 3.549114782 | 1.267685336 | 0.989284062 | NA |
| ASV_16s_6570 | 0.751885411 | 1.079099481  | 3.550119148 | 1.78620097  | 0.97072108  | NA |
| ASV_16s_6571 | 0.745687695 | 0.359771363  | 3.550340787 | 1.265527769 | 0.98933906  | NA |
| ASV_16s_6572 | 0.749657    | 0.315939098  | 3.550683136 | 1.610806419 | 0.978223809 | NA |
| ASV_16s_6573 | 0.693083464 | 0.507152786  | 3.550678772 | 2.812357913 | 0.901801111 | NA |
| ASV_16s_6574 | 0.427904921 | 0.73474207   | 3.550827157 | 1.301141716 | NA          | NA |
| ASV_16s_6575 | 0.564716216 | -0.299106723 | 3.549472878 | 2.098925993 | NA          | NA |
| ASV_16s_6576 | 0.180481349 | -0.086885608 | 3.550656968 | 1.123515025 | 0.992582683 | NA |
| ASV_16s_6577 | 0.61162603  | 0.521259967  | 3.548422511 | 2.101352198 | 0.954018242 | NA |
| ASV_16s_6578 | 0.643385113 | -0.534583537 | 3.548671321 | 1.841590114 | 0.968085402 | NA |
| ASV_16s_6579 | 0.631245919 | 0.538794113  | 3.54809743  | 2.303094737 | 0.941180738 | NA |
| ASV_16s_6580 | 0.633279728 | -1.391123204 | 3.548663284 | 1.315703699 | NA          | NA |
| ASV_16s_6581 | 0.712249003 | -0.793488632 | 3.54858216  | 1.943686661 | 0.962891267 | NA |
| ASV_16s_6582 | 0.705421744 | -0.793438996 | 3.548610453 | 1.945246375 | 0.962808543 | NA |
| ASV_16s_6583 | 0.740966805 | 1.892060342  | 3.547505074 | 0.91080939  | 0.996141926 | NA |
| ASV_16s_6584 | 0.714096749 | 0.884025633  | 3.546793856 | 1.860074042 | 0.967177315 | NA |
| ASV_16s_6585 | 0.727977947 | -0.792604284 | 3.548748254 | 2.027474938 | 0.95830404  | NA |
| ASV_16s_6586 | 0.666878337 | -1.904638251 | 3.54627619  | 0.72372     | NA          | NA |
| ASV_16s_6587 | 0.918544407 | 0.550454493  | 3.54975419  | 1.702326738 | NA          | NA |
| ASV_16s_6588 | 0.916709952 | 0.419269924  | 3.549463419 | 1.099382781 | NA          | NA |
| ASV_16s_6589 | 0.257826801 | -0.068320907 | 3.549923567 | 1.321274117 | NA          | NA |
| ASV_16s_6590 | 0.582316457 | -2.360925084 | 3.547269929 | 0.507209713 | NA          | NA |
| ASV_16s_6591 | 0.393861218 | 1.287275582  | 3.549595378 | 1.260300576 | NA          | NA |
| ASV_16s_6592 | 0.580531391 | -0.069449524 | 3.549607453 | 2.226325821 | NA          | NA |
| ASV_16s_6593 | 0.69032163  | -0.297403707 | 3.548145159 | 1.1562789   | NA          | NA |
| ASV_16s_6594 | 0.338008932 | 1.056992551  | 3.550720031 | 1.100682387 | NA          | NA |
| ASV_16s_6595 | 0.746377078 | 0.342892662  | 3.549620598 | 2.203113679 | 0.947748426 | NA |

|              |             |              |             |              |             |    |
|--------------|-------------|--------------|-------------|--------------|-------------|----|
| ASV_16s_6596 | 1.032916885 | -0.684986746 | 3.549166456 | 1.224118465  | NA          | NA |
| ASV_16s_6597 | 0.82472547  | 0.366401697  | 3.5506797   | 0.903903389  | 0.996233434 | NA |
| ASV_16s_6598 | 0.810323229 | 1.788084821  | 3.548852467 | 1.849843126  | 0.967681709 | NA |
| ASV_16s_6599 | 1.043502699 | 0.691447645  | 3.549407225 | 2.695194872  | 0.911696107 | NA |
| ASV_16s_6600 | 0.819472602 | 0.343547459  | 3.549526144 | 2.418720321  | 0.93309215  | NA |
| ASV_16s_6601 | 0.85417525  | 0.343611467  | 3.549530909 | 2.437636094  | 0.931719464 | NA |
| ASV_16s_6602 | 0.564625286 | -0.246428502 | 3.549482936 | 2.132261376  | NA          | NA |
| ASV_16s_6603 | 0.567758596 | -0.683401543 | 3.549520622 | 1.031186971  | NA          | NA |
| ASV_16s_6604 | 0.555604287 | -0.683328124 | 3.549537769 | 1.02421561   | NA          | NA |
| ASV_16s_6605 | 0.585756848 | 0.031961085  | 3.549362172 | 2.151417682  | 0.950986314 | NA |
| ASV_16s_6606 | 0.603855479 | -0.020642496 | 3.549328955 | 2.136757102  | 0.951884762 | NA |
| ASV_16s_6607 | 0.657632465 | 0.158951601  | 3.548921565 | 2.517529335  | 0.925771314 | NA |
| ASV_16s_6608 | 0.627880651 | -0.845842493 | 3.548978409 | 1.771355984  | 0.971405695 | NA |
| ASV_16s_6609 | 0.624462792 | -0.343022654 | 3.548844325 | 1.840878633  | 0.968120071 | NA |
| ASV_16s_6610 | 0.610270931 | 0.154537172  | 3.548470828 | 2.542371364  | 0.923872806 | NA |
| ASV_16s_6611 | 0.668394546 | 0.191044081  | 3.548474996 | 2.772417702  | NA          | NA |
| ASV_16s_6612 | 0.69685515  | -0.791907718 | 3.548897836 | 2.002320044  | 0.959711848 | NA |
| ASV_16s_6613 | 0.692292699 | -0.268411589 | 3.550042245 | 1.33029619   | 0.987611238 | NA |
| ASV_16s_6614 | 0.605163636 | -1.203676955 | 3.54911727  | 2.217196434  | NA          | NA |
| ASV_16s_6615 | 0.525264608 | 2.125179991  | 3.549617803 | 0.629926377  | NA          | NA |
| ASV_16s_6616 | 0.504582074 | -1.502175363 | 3.548765546 | 1.083264361  | NA          | NA |
| ASV_16s_6617 | 0.961021462 | 0.419281054  | 3.54943789  | 1.114593633  | NA          | NA |
| ASV_16s_6618 | 0.700028062 | 2.181720714  | 3.549306818 | 0.670270235  | NA          | NA |
| ASV_16s_6619 | 0.506197966 | 0.664177982  | 3.549795359 | 1.840762856  | NA          | NA |
| ASV_16s_6620 | 0.800478847 | 2.974462828  | 3.547530976 | 0.445171584  | 0.99962351  | NA |
| ASV_16s_6621 | 0.630859221 | -0.061270365 | 3.549751076 | 1.95740284   | 0.962160319 | NA |
| ASV_16s_6622 | 0.677149764 | 0.309362076  | 3.549768082 | 1.100642472  | 0.993037668 | NA |
| ASV_16s_6623 | 1.357059098 | 1.253229898  | 3.549408663 | 1.25439828   | NA          | NA |
| ASV_16s_6624 | 1.028554713 | 0.308528433  | 3.547087478 | 1.891020348  | 0.965625009 | NA |
| ASV_16s_6625 | 1.003748743 | 0.64475936   | 3.549581478 | 2.836263776  | 0.899724709 | NA |
| ASV_16s_6626 | 1.06651884  | 0.337427001  | 3.549341337 | 2.778066791  | NA          | NA |
| ASV_16s_6627 | 0.695992582 | 0.342893968  | 3.549493657 | 2.345682561  | 0.938262389 | NA |
| ASV_16s_6628 | 0.767389047 | 0.693848312  | 3.550649053 | 1.557176915  | 0.980263921 | NA |
| ASV_16s_6629 | 0.560938012 | -0.14630102  | 3.549519155 | 2.118600281  | NA          | NA |
| ASV_16s_6630 | 0.590868498 | -0.26539703  | 3.549451436 | 2.167534137  | 0.949988535 | NA |
| ASV_16s_6631 | 0.560343786 | -0.296946686 | 3.54947823  | 2.093180451  | 0.954503366 | NA |
| ASV_16s_6632 | 0.577177679 | -0.321126509 | 3.549455829 | 2.098695453  | 0.954176263 | NA |
| ASV_16s_6633 | 0.66336672  | -0.385386043 | 3.549370017 | 2.143816092  | 0.951453259 | NA |
| ASV_16s_6634 | 0.593343564 | -0.411759349 | 3.54943572  | 1.989379862  | 0.960425827 | NA |
| ASV_16s_6635 | 0.561459318 | -0.400662482 | 3.549470237 | 1.958213722  | NA          | NA |
| ASV_16s_6636 | 0.561394338 | -0.683362054 | 3.549529515 | 1.027550599  | NA          | NA |
| ASV_16s_6637 | 0.175717467 | -0.169945966 | 3.550657774 | 0.741209173  | NA          | NA |
| ASV_16s_6638 | 0.356993363 | 0.21999336   | 3.550657619 | 1.069752875  | NA          | NA |
| ASV_16s_6639 | 0.60407748  | 0.17107948   | 3.549172442 | 2.263310419  | 0.943842058 | NA |
| ASV_16s_6640 | 0.623890313 | -0.108561313 | 3.549468524 | 1.756028493  | NA          | NA |
| ASV_16s_6641 | 0.597885719 | 0.325487549  | 3.548862428 | 2.099095399  | 0.954152494 | NA |
| ASV_16s_6642 | 0.586667346 | 0.230623346  | 3.548532704 | 2.551458861  | NA          | NA |
| ASV_16s_6643 | 0.645047363 | 0.667065916  | 3.548033833 | 2.402400815  | NA          | NA |
| ASV_16s_6644 | 0.650295721 | -0.149028666 | 3.548065951 | 1.95340873   | 0.962373978 | NA |
| ASV_16s_6645 | 0.696090896 | -0.793420047 | 3.548618008 | 1.92875027   | 0.963678323 | NA |
| ASV_16s_6646 | 0.717535566 | -0.793337411 | 3.548636459 | 1.981356484  | 0.960865026 | NA |
| ASV_16s_6647 | 0.744884552 | -0.53269837  | 3.548755832 | 1.995573637  | 0.960084951 | NA |
| ASV_16s_6648 | 0.703619449 | -0.857618347 | 3.548431902 | 1.637411364  | 0.977167843 | NA |
| ASV_16s_6649 | 0.657324102 | -0.745876286 | 3.549307334 | 1.395160264  | 0.98571904  | NA |
| ASV_16s_6650 | 0.694677349 | -29.99491627 | 3.548022842 | -0.415276284 | 1           | NA |
| ASV_16s_6651 | 0.671646089 | 0.222614651  | 3.549329397 | 1.68983806   | NA          | NA |
| ASV_16s_6652 | 0.638809728 | -0.088614026 | 3.549782941 | 1.861609612  | 0.967101232 | NA |
| ASV_16s_6653 | 0.419405366 | 0.69095162   | 3.550738108 | 1.088426328  | NA          | NA |
| ASV_16s_6654 | 0.460845916 | 2.135214927  | 3.54959229  | 0.549563169  | NA          | NA |
| ASV_16s_6655 | 0.597628533 | 0.403476798  | 3.549957779 | 1.030979287  | NA          | NA |
| ASV_16s_6656 | 0.443551024 | 1.337109995  | 3.549962437 | 0.846127778  | NA          | NA |
| ASV_16s_6657 | 0.72350223  | -0.550827203 | 3.549146175 | 1.016002446  | NA          | NA |
| ASV_16s_6658 | 0.392093892 | 0.219987749  | 3.550650349 | 1.117310738  | 0.9927079   | NA |
| ASV_16s_6659 | 0.83089805  | 1.723630966  | 3.548230893 | 1.468968449  | NA          | NA |
| ASV_16s_6660 | 0.622333307 | -0.069614371 | 3.549712992 | 2.203258046  | 0.947739232 | NA |
| ASV_16s_6661 | 0.646412586 | 1.818466878  | 3.547564323 | 1.015190959  | NA          | NA |
| ASV_16s_6662 | 0.615622257 | 0.385220108  | 3.55054446  | 0.809083306  | NA          | NA |

|              |             |              |             |              |             |    |
|--------------|-------------|--------------|-------------|--------------|-------------|----|
| ASV_16s_6663 | 0.460830766 | 0.013696437  | 3.550296778 | 1.542765445  | NA          | NA |
| ASV_16s_6664 | 0.769898826 | 0.693852197  | 3.550648737 | 1.558845895  | 0.980202208 | NA |
| ASV_16s_6665 | 0.765252429 | 0.693846547  | 3.550649323 | 1.555748311  | 0.980316656 | NA |
| ASV_16s_6666 | 0.551822616 | -0.171093846 | 3.549519679 | 2.113072238  | NA          | NA |
| ASV_16s_6667 | 0.583476682 | -0.256612586 | 3.549460539 | 2.159864258  | 0.9504647   | NA |
| ASV_16s_6668 | 0.568936311 | -0.317375049 | 3.549465336 | 2.088695727  | NA          | NA |
| ASV_16s_6669 | 0.195427689 | -0.627891291 | 3.55079274  | 0.683975651  | NA          | NA |
| ASV_16s_6670 | 0.221279592 | 0.130443351  | 3.550640535 | 1.58544963   | NA          | NA |
| ASV_16s_6671 | 0.584375009 | 0.163126121  | 3.549413791 | 2.137535098  | 0.951837305 | NA |
| ASV_16s_6672 | 0.252497661 | 0.79771526   | 3.550530476 | 0.836423705  | 0.997054225 | NA |
| ASV_16s_6673 | 0.575304961 | 0.271165588  | 3.549430454 | 2.153114527  | NA          | NA |
| ASV_16s_6674 | 0.581725793 | 0.070027805  | 3.549077303 | 2.200545034  | 0.947911867 | NA |
| ASV_16s_6675 | 0.613382681 | 1.357692663  | 3.548171737 | 1.943312533  | 0.962911095 | NA |
| ASV_16s_6676 | 0.71336117  | -0.836727573 | 3.548333154 | 2.079924358  | 0.955284486 | NA |
| ASV_16s_6677 | 0.612577118 | 0.471933347  | 3.548095738 | 2.037390446  | 0.95774191  | NA |
| ASV_16s_6678 | 0.725513469 | -0.793156919 | 3.54865305  | 2.001316298  | 0.959767479 | NA |
| ASV_16s_6679 | 0.677801744 | -0.805529004 | 3.54907003  | 1.344936697  | 0.987198432 | NA |
| ASV_16s_6680 | 0.700647641 | -0.791879325 | 3.548902712 | 2.007982632  | 0.959397226 | NA |
| ASV_16s_6681 | 0.676942055 | -0.790583842 | 3.549106255 | 1.987793896  | 0.960512855 | NA |
| ASV_16s_6682 | 0.650400669 | -0.471581436 | 3.54951398  | 1.045225016  | 0.994065634 | NA |
| ASV_16s_6683 | 0.638949846 | 0.224418351  | 3.549336815 | 1.549982299  | 0.980528652 | NA |
| ASV_16s_6684 | 0.78423194  | 0.403563794  | 3.549709548 | 1.118556237  | 0.992682871 | NA |
| ASV_16s_6685 | 0.307608164 | 1.052483562  | 3.550518441 | 1.034642671  | NA          | NA |
| ASV_16s_6686 | 0.635683336 | -0.349018837 | 3.549147662 | 1.104474745  | NA          | NA |
| ASV_16s_6687 | 0.467253833 | -23.02563721 | 3.54918776  | -0.111475771 | NA          | NA |
| ASV_16s_6688 | 0.777694689 | 1.897318433  | 3.54978812  | 0.565929451  | NA          | NA |
| ASV_16s_6689 | 0.455039583 | -0.216819719 | 3.549660636 | 1.72006203   | NA          | NA |
| ASV_16s_6690 | 1.025629462 | 0.341331252  | 3.55067685  | 0.736800525  | NA          | NA |
| ASV_16s_6691 | 0.523851879 | 0.003421569  | 3.548746051 | 1.953397588  | NA          | NA |
| ASV_16s_6692 | 0.495242417 | 0.187254426  | 3.551023043 | 0.879114783  | NA          | NA |
| ASV_16s_6693 | 0.460667556 | -0.60726364  | 3.550074934 | 0.953096451  | NA          | NA |
| ASV_16s_6694 | 0.872094919 | 0.376444553  | 3.547977501 | 1.673806926  | 0.975675896 | NA |
| ASV_16s_6695 | 0.614753007 | -0.116518325 | 3.549917188 | 1.905893837  | 0.964864702 | NA |
| ASV_16s_6696 | 0.740060569 | -0.014219143 | 3.550535449 | 1.476281826  | 0.98311944  | NA |
| ASV_16s_6697 | 0.990214141 | 0.714320708  | 3.549437605 | 2.656456155  | 0.914862436 | NA |
| ASV_16s_6698 | 0.857163389 | 0.808248588  | 3.549558031 | 1.639748742  | 0.977073675 | NA |
| ASV_16s_6699 | 0.709408224 | 0.898569525  | 3.549068347 | 1.99743544   | 0.959982175 | NA |
| ASV_16s_6700 | 0.664925483 | 0.336197283  | 3.550667002 | 1.317890528  | 0.987954569 | NA |
| ASV_16s_6701 | 0.814456341 | 0.549958981  | 3.549836862 | 1.959844069  | 0.962029403 | NA |
| ASV_16s_6702 | 0.607077097 | 0.36042395   | 3.550761333 | 1.542524511  | NA          | NA |
| ASV_16s_6703 | 0.759725669 | 0.315939246  | 3.550681868 | 1.617588736  | 0.977957387 | NA |
| ASV_16s_6704 | 0.683851294 | 0.315939232  | 3.550692355 | 1.564064583  | 0.980008504 | NA |
| ASV_16s_6705 | 0.7898802   | 0.69386096   | 3.550646299 | 1.571880535  | 0.979716313 | NA |
| ASV_16s_6706 | 0.570031514 | -0.37983212  | 3.549459958 | 2.007864194  | 0.959403821 | NA |
| ASV_16s_6707 | 0.56544868  | -0.408263601 | 3.549466071 | 1.951003068  | NA          | NA |
| ASV_16s_6708 | 0.560060485 | -0.683355667 | 3.54953142  | 1.026775256  | NA          | NA |
| ASV_16s_6709 | 0.173114246 | -0.169937009 | 3.550660052 | 0.733986339  | NA          | NA |
| ASV_16s_6710 | 0.351704573 | 0.219994307  | 3.550658841 | 1.062175253  | NA          | NA |
| ASV_16s_6711 | 0.351704573 | 0.219994307  | 3.550658841 | 1.062175253  | NA          | NA |
| ASV_16s_6712 | 0.182534034 | 0.220052327  | 3.550735115 | 0.733072093  | NA          | NA |
| ASV_16s_6713 | 0.366301078 | 0.596269262  | 3.550624943 | 1.01339982   | 0.994609473 | NA |
| ASV_16s_6714 | 0.600637777 | 0.033606347  | 3.549094866 | 2.174744769  | 0.949538698 | NA |
| ASV_16s_6715 | 0.589122035 | 0.16296125   | 3.548671252 | 2.429707111  | NA          | NA |
| ASV_16s_6716 | 0.584322581 | -0.085965061 | 3.54870465  | 2.083589479  | 0.955069241 | NA |
| ASV_16s_6717 | 0.597536692 | 0.492342919  | 3.548634948 | 2.100814365  | 0.954050256 | NA |
| ASV_16s_6718 | 0.573594058 | 0.440111514  | 3.548903345 | 2.182091025  | NA          | NA |
| ASV_16s_6719 | 0.713452215 | -0.794514689 | 3.548505034 | 1.710143608  | 0.974131554 | NA |
| ASV_16s_6720 | 0.638665089 | -0.169775342 | 3.548150666 | 2.280293282  | 0.942713718 | NA |
| ASV_16s_6721 | 0.661498439 | 0.080637401  | 3.548378241 | 2.677441138  | 0.913153829 | NA |
| ASV_16s_6722 | 0.555588076 | 0.749036959  | 3.548008214 | 2.009218111  | NA          | NA |
| ASV_16s_6723 | 0.628183779 | -0.321281633 | 3.548969241 | 1.740892671  | 0.972781787 | NA |
| ASV_16s_6724 | 0.683316803 | -0.964142015 | 3.548764951 | 1.777981552  | NA          | NA |
| ASV_16s_6725 | 0.741340656 | -0.793239914 | 3.548621138 | 2.017937168  | 0.958840914 | NA |
| ASV_16s_6726 | 0.688035276 | -0.791590689 | 3.548964979 | 1.995659276  | 0.960080227 | NA |
| ASV_16s_6727 | 0.714455204 | 0.300527448  | 3.549541476 | 1.91810669   | NA          | NA |
| ASV_16s_6728 | 0.582917978 | -0.960216461 | 3.548953609 | 1.678928105  | NA          | NA |
| ASV_16s_6729 | 0.621165813 | -0.101668957 | 3.54999662  | 1.787266533  | 0.970671585 | NA |

|              |             |              |             |             |             |    |
|--------------|-------------|--------------|-------------|-------------|-------------|----|
| ASV_16s_6730 | 0.573127839 | 0.363100989  | 3.548557967 | 1.374121451 | NA          | NA |
| ASV_16s_6731 | 0.65316585  | -0.129682992 | 3.550460586 | 1.32257163  | 0.987825712 | NA |
| ASV_16s_6732 | 0.768669569 | 0.403558133  | 3.549725685 | 1.112088768 | NA          | NA |
| ASV_16s_6733 | 0.378962641 | 0.219989639  | 3.550652912 | 1.100020115 | 0.993049795 | NA |
| ASV_16s_6734 | 0.75889101  | 3.082812711  | 3.546933878 | 0.322528151 | NA          | NA |
| ASV_16s_6735 | 0.563019793 | 0.062907458  | 3.550142544 | 2.173959982 | NA          | NA |
| ASV_16s_6736 | 0.440993826 | 1.185919986  | 3.550836741 | 0.966035264 | NA          | NA |
| ASV_16s_6737 | 0.240672047 | -0.256632228 | 3.550860524 | 1.283026394 | NA          | NA |
| ASV_16s_6738 | 0.505755503 | -0.146736643 | 3.549963625 | 1.710935609 | NA          | NA |
| ASV_16s_6739 | 0.762181903 | 0.884730147  | 3.55000226  | 1.182934782 | 0.991314527 | NA |
| ASV_16s_6740 | 0.712783678 | -0.550798756 | 3.549153094 | 1.011186917 | NA          | NA |
| ASV_16s_6741 | 0.9335752   | 0.422792056  | 3.550646603 | 3.161609099 | 0.869660367 | NA |
| ASV_16s_6742 | 0.412401119 | 0.734709055  | 3.550836591 | 1.282386944 | NA          | NA |
| ASV_16s_6743 | 0.548801821 | -0.247928392 | 3.549501017 | 2.103752357 | NA          | NA |
| ASV_16s_6744 | 0.569089236 | -0.295861205 | 3.549468627 | 2.109129076 | 0.953554015 | NA |
| ASV_16s_6745 | 0.539262984 | -0.683218625 | 3.549562062 | 1.014579848 | NA          | NA |
| ASV_16s_6746 | 0.627564129 | -0.710457904 | 3.549125123 | 1.86261355  | 0.967051437 | NA |
| ASV_16s_6747 | 0.593072221 | -0.869385682 | 3.549134926 | 1.575113725 | NA          | NA |
| ASV_16s_6748 | 0.647634215 | 0.81867334   | 3.548639943 | 2.425647125 | NA          | NA |
| ASV_16s_6749 | 0.705728544 | -0.79439334  | 3.548509334 | 1.728103011 | 0.973347988 | NA |
| ASV_16s_6750 | 0.565984847 | 1.75E-04     | 3.548485319 | 2.347679205 | NA          | NA |
| ASV_16s_6751 | 0.622072801 | 0.583973613  | 3.54785992  | 2.262838513 | NA          | NA |
| ASV_16s_6752 | 0.667116496 | -0.832386514 | 3.549049235 | 1.35967704  | 0.986774431 | NA |
| ASV_16s_6753 | 0.670788929 | 0.094446613  | 3.548535178 | 2.618522134 | 0.917911101 | NA |
| ASV_16s_6754 | 0.5614977   | 0.742434874  | 3.55085048  | 0.983151378 | NA          | NA |
| ASV_16s_6755 | 0.69303975  | -0.79203062  | 3.548873856 | 1.994188219 | 0.960161336 | NA |
| ASV_16s_6756 | 0.571698348 | -1.624586564 | 3.548109379 | 1.047847239 | 0.994019329 | NA |
| ASV_16s_6757 | 0.703737395 | 0.236277372  | 3.549682174 | 2.198257429 | 0.948057201 | NA |
| ASV_16s_6758 | 0.630544112 | 1.397746532  | 3.547518634 | 1.060163006 | NA          | NA |
| ASV_16s_6759 | 0.688462664 | 0.68417174   | 3.550577293 | 1.798791621 | 0.970133216 | NA |
| ASV_16s_6760 | 0.452467959 | -0.55768157  | 3.550167677 | 0.833434952 | 0.997087578 | NA |
| ASV_16s_6761 | 0.629344281 | -0.088089421 | 3.549770222 | 1.683880275 | NA          | NA |
| ASV_16s_6762 | 0.48120636  | 0.028161506  | 3.550075266 | 1.301287527 | NA          | NA |
| ASV_16s_6763 | 0.571728644 | -0.180094524 | 3.548353748 | 1.775816466 | NA          | NA |
| ASV_16s_6764 | 0.71098544  | -1.349867421 | 3.549022221 | 1.053238659 | NA          | NA |
| ASV_16s_6765 | 0.391686506 | -0.201727112 | 3.550262478 | 1.395492706 | 0.985708919 | NA |
| ASV_16s_6766 | 0.415766954 | 0.247398289  | 3.550445066 | 0.853518606 | 0.996858647 | NA |
| ASV_16s_6767 | 0.396394384 | -0.04917296  | 3.550467464 | 1.005952095 | NA          | NA |
| ASV_16s_6768 | 0.451287886 | 0.67361592   | 3.549926477 | 1.343655975 | NA          | NA |
| ASV_16s_6769 | 0.544220248 | -0.143868104 | 3.548800568 | 1.756465081 | NA          | NA |
| ASV_16s_6770 | 0.819978439 | 0.799693575  | 3.549742711 | 1.28763681  | 0.988767173 | NA |
| ASV_16s_6771 | 0.860651128 | -0.561241368 | 3.549369048 | 1.845029424 | NA          | NA |
| ASV_16s_6772 | 0.323769674 | 0.285314864  | 3.551207866 | 0.862936921 | NA          | NA |
| ASV_16s_6773 | 0.707168566 | 0.049175653  | 3.550630736 | 2.69986059  | 0.911311168 | NA |
| ASV_16s_6774 | 0.783608822 | 0.34492274   | 3.550564328 | 1.085204758 | 0.993334531 | NA |
| ASV_16s_6775 | 0.882041661 | 0.880911905  | 3.549709702 | 2.457970807 | 0.930228513 | NA |
| ASV_16s_6776 | 0.696203252 | 0.534980423  | 3.549512101 | 2.332669071 | 0.939161728 | NA |
| ASV_16s_6777 | 0.80083892  | 1.186206733  | 3.549894877 | 1.22047053  | 0.990447905 | NA |
| ASV_16s_6778 | 0.624605044 | 0.693774539  | 3.550671147 | 1.452480417 | NA          | NA |
| ASV_16s_6779 | 0.546858531 | -0.119182838 | 3.549549556 | 2.075950409 | NA          | NA |
| ASV_16s_6780 | 0.546858531 | -0.119182838 | 3.549549556 | 2.075950409 | NA          | NA |
| ASV_16s_6781 | 0.607445251 | -0.298453915 | 3.549428381 | 2.170605586 | 0.94979718  | NA |
| ASV_16s_6782 | 0.593449223 | -0.371584369 | 3.549434916 | 2.059298097 | 0.956485506 | NA |
| ASV_16s_6783 | 0.547132326 | -0.382920085 | 3.549486702 | 1.964013736 | 0.961805221 | NA |
| ASV_16s_6784 | 0.191052442 | -0.621585214 | 3.550815447 | 0.676149927 | NA          | NA |
| ASV_16s_6786 | 0.621092398 | -0.643177656 | 3.549136342 | 1.910148883 | 0.964645492 | NA |
| ASV_16s_6787 | 0.615065166 | -0.499156396 | 3.549274449 | 1.82888764  | 0.968701176 | NA |
| ASV_16s_6788 | 0.595214996 | 0.035855969  | 3.548793957 | 2.280042517 | 0.942730463 | NA |
| ASV_16s_6789 | 0.541178078 | -0.349903746 | 3.548943491 | 1.210908318 | NA          | NA |
| ASV_16s_6790 | 0.555194745 | 0.003945242  | 3.548790891 | 2.14589089  | NA          | NA |
| ASV_16s_6791 | 0.684263401 | -0.720299969 | 3.548675013 | 1.842651696 | 0.968033635 | NA |
| ASV_16s_6792 | 0.587211005 | 0.037370537  | 3.548494152 | 2.43500006  | NA          | NA |
| ASV_16s_6793 | 0.781544267 | -0.79404034  | 3.548410087 | 1.954260914 | NA          | NA |
| ASV_16s_6794 | 0.706943678 | -0.059028373 | 3.547956331 | 1.847673538 | 0.967788109 | NA |
| ASV_16s_6795 | 0.68043328  | 0.495997317  | 3.548305295 | 2.212079437 | NA          | NA |
| ASV_16s_6796 | 0.686808054 | -0.888586879 | 3.548728294 | 1.609132648 | 0.978289266 | NA |
| ASV_16s_6797 | 0.600398491 | -0.072062025 | 3.54966075  | 1.929883579 | 0.963618931 | NA |

|              |             |              |             |             |             |    |
|--------------|-------------|--------------|-------------|-------------|-------------|----|
| ASV_16s_6798 | 0.649612328 | 1.282901562  | 3.549297252 | 1.408403541 | 0.985312481 | NA |
| ASV_16s_6799 | 0.836171117 | -0.567416968 | 3.549166552 | 1.133333761 | NA          | NA |
| ASV_16s_6800 | 0.192772413 | 0.390131407  | 3.551182053 | 0.593715421 | NA          | NA |
| ASV_16s_6801 | 0.393408287 | 0.219987595  | 3.550650103 | 1.118987305 | 0.992674195 | NA |
| ASV_16s_6802 | 0.619838749 | -0.987925137 | 3.549217451 | 1.007701336 | 0.994703345 | NA |
| ASV_16s_6803 | 0.554339871 | -0.069447014 | 3.549638169 | 2.176207742 | NA          | NA |
| ASV_16s_6804 | 0.545033196 | -1.073348618 | 3.549159232 | 1.576473361 | NA          | NA |
| ASV_16s_6805 | 0.517569281 | 1.779889015  | 3.550078674 | 0.824580533 | NA          | NA |
| ASV_16s_6806 | 0.60406804  | 2.474522256  | 3.548478099 | 0.838320681 | NA          | NA |
| ASV_16s_6807 | 0.685661508 | 1.837213348  | 3.548812058 | 1.368405285 | 0.986519386 | NA |
| ASV_16s_6808 | 0.739138273 | 0.233660839  | 3.549808172 | 2.985470025 | NA          | NA |
| ASV_16s_6809 | 0.698641155 | 0.512732175  | 3.550605275 | 2.511399836 | 0.926236202 | NA |
| ASV_16s_6810 | 0.686348218 | 0.319174686  | 3.550725958 | 1.387216505 | 0.985959596 | NA |
| ASV_16s_6811 | 0.445617747 | 0.305276414  | 3.550767664 | 0.970599282 | NA          | NA |
| ASV_16s_6812 | 1.001529537 | 0.546181046  | 3.549527433 | 2.814727248 | 0.901596171 | NA |
| ASV_16s_6813 | 0.81431605  | 0.622430351  | 3.550687384 | 2.431788527 | NA          | NA |
| ASV_16s_6814 | 0.682979296 | 0.348957969  | 3.550509487 | 1.253512294 | 0.98964215  | NA |
| ASV_16s_6815 | 0.406199599 | 0.734695507  | 3.550840565 | 1.27468776  | NA          | NA |
| ASV_16s_6816 | 0.785743805 | 0.69385785   | 3.550646797 | 1.569165756 | 0.979818086 | NA |
| ASV_16s_6817 | 0.530459182 | 0.076597852  | 3.549734961 | 1.712538301 | NA          | NA |
| ASV_16s_6818 | 0.559573093 | -0.160911615 | 3.549514548 | 2.122915296 | NA          | NA |
| ASV_16s_6819 | 0.554342147 | -0.157122551 | 3.549522348 | 2.112150898 | NA          | NA |
| ASV_16s_6820 | 0.530704457 | -0.188297001 | 3.549539695 | 2.078768809 | NA          | NA |
| ASV_16s_6822 | 0.571213877 | 0.203339779  | 3.549039435 | 2.245869735 | NA          | NA |
| ASV_16s_6823 | 0.556406349 | 0.322184901  | 3.548953748 | 2.209686252 | NA          | NA |
| ASV_16s_6824 | 0.597761891 | -0.190448357 | 3.549421507 | 1.824940307 | NA          | NA |
| ASV_16s_6825 | 0.57455284  | -0.014726344 | 3.548818347 | 2.144899025 | 0.951386882 | NA |
| ASV_16s_6826 | 0.630531827 | 0.065479935  | 3.548629139 | 2.39236818  | 0.934981485 | NA |
| ASV_16s_6827 | 0.575315454 | 0.383528766  | 3.548948263 | 2.116210542 | 0.95312914  | NA |
| ASV_16s_6828 | 0.549479184 | 0.066880075  | 3.548634897 | 2.306224228 | 0.940968726 | NA |
| ASV_16s_6829 | 0.795027865 | 2.055328787  | 3.54822779  | 0.670490149 | NA          | NA |
| ASV_16s_6830 | 0.651432489 | -0.543061706 | 3.290979416 | 2.159721496 | 0.950473541 | NA |
| ASV_16s_6831 | 0.685130143 | -0.793856326 | 3.548554996 | 1.832461999 | 0.968528585 | NA |
| ASV_16s_6832 | 0.507755453 | 1.201290295  | 3.548599333 | 1.805685376 | NA          | NA |
| ASV_16s_6833 | 0.689839307 | -0.793554852 | 3.548589442 | 1.892393365 | NA          | NA |
| ASV_16s_6834 | 0.644983404 | 0.036826116  | 3.548414568 | 2.595613915 | 0.919726826 | NA |
| ASV_16s_6835 | 0.614106702 | -0.07684863  | 3.550467524 | 1.36775788  | 0.986538405 | NA |
| ASV_16s_6836 | 0.701548325 | -0.616063717 | 3.549858983 | 1.924449963 | 0.963903198 | NA |
| ASV_16s_6837 | 0.610621231 | -0.101034803 | 3.550229394 | 1.779906726 | 0.971012479 | NA |
| ASV_16s_6838 | 0.720464883 | -0.661001563 | 3.548803637 | 2.091444595 | 0.954606063 | NA |
| ASV_16s_6839 | 0.725150144 | 0.313641654  | 3.550620976 | 2.851243027 | 0.898413944 | NA |
| ASV_16s_6840 | 0.765212153 | 1.331535769  | 3.336931653 | 1.97075507  | 0.961441242 | NA |
| ASV_16s_6841 | 0.5944535   | 0.281068496  | 3.548681582 | 1.573134574 | NA          | NA |
| ASV_16s_6842 | 0.643555492 | 0.344463452  | 3.549882499 | 1.518064659 | NA          | NA |
| ASV_16s_6843 | 0.34177198  | -0.062132519 | 3.550612337 | 1.056447466 | NA          | NA |
| ASV_16s_6844 | 0.423553543 | 0.068045409  | 3.549579287 | 1.702051477 | NA          | NA |
| ASV_16s_6845 | 0.191300868 | 0.389457074  | 3.551192394 | 0.59121005  | NA          | NA |
| ASV_16s_6846 | 0.374767959 | 0.219990333  | 3.550653769 | 1.094357435 | 0.993159517 | NA |
| ASV_16s_6847 | 0.975128936 | 0.550385567  | 3.549357628 | 1.861967682 | NA          | NA |
| ASV_16s_6848 | 0.624049086 | 2.067687445  | 3.548346066 | 0.708482037 | 0.998269713 | NA |
| ASV_16s_6849 | 0.754758891 | 1.715801241  | 3.5495121   | 0.929447821 | 0.995887794 | NA |
| ASV_16s_6850 | 0.688087649 | 0.677314187  | 3.550633776 | 1.542775489 | 0.980791715 | NA |
| ASV_16s_6851 | 0.781978686 | 0.363070119  | 3.550627228 | 0.808766017 | 0.997353461 | NA |
| ASV_16s_6852 | 0.6603319   | 0.546551453  | 3.550661863 | 2.392950387 | 0.934940034 | NA |
| ASV_16s_6853 | 0.759002796 | 0.460874555  | 3.549887097 | 2.210857051 | 0.947254107 | NA |
| ASV_16s_6854 | 0.75109118  | 0.343565263  | 3.54957979  | 2.240942598 | 0.945310579 | NA |
| ASV_16s_6855 | 0.754833734 | 0.343755865  | 3.549613114 | 2.207607885 | 0.947461821 | NA |
| ASV_16s_6856 | 0.801651723 | 0.713337493  | 3.55070797  | 2.013365392 | NA          | NA |
| ASV_16s_6857 | 0.615141331 | 0.31593941   | 3.550704084 | 1.510188066 | NA          | NA |
| ASV_16s_6858 | 0.779347713 | 1.051260039  | 3.550406598 | 1.330895928 | 0.98759449  | NA |
| ASV_16s_6859 | 0.718127992 | 0.693822731  | 3.550655687 | 1.523394218 | 0.981488683 | NA |
| ASV_16s_6860 | 0.585292502 | -0.308842816 | 3.549448995 | 2.124697394 | 0.952617238 | NA |
| ASV_16s_6861 | 0.148935453 | -0.169836216 | 3.550684986 | 0.662381614 | NA          | NA |
| ASV_16s_6862 | 0.177044288 | 0.220056019  | 3.550740028 | 0.718174288 | NA          | NA |
| ASV_16s_6864 | 0.599657597 | 0.167156841  | 3.549222311 | 2.15638339  | 0.950680011 | NA |
| ASV_16s_6865 | 0.589882984 | -0.3629267   | 3.549323411 | 1.883297623 | 0.966016137 | NA |
| ASV_16s_6866 | 0.694781179 | -0.794521954 | 3.548593798 | 1.581046878 | 0.979370453 | NA |

|              |             |              |             |             |             |    |
|--------------|-------------|--------------|-------------|-------------|-------------|----|
| ASV_16s_6867 | 0.719605536 | 1.925198462  | 3.548703913 | 0.613438734 | 0.998916078 | NA |
| ASV_16s_6868 | 0.574663667 | 0.231290569  | 3.548531799 | 2.495438808 | NA          | NA |
| ASV_16s_6869 | 0.661456875 | -0.844639039 | 3.548551371 | 1.570518349 | NA          | NA |
| ASV_16s_6870 | 0.589727057 | 1.240236745  | 3.548000659 | 1.717030361 | NA          | NA |
| ASV_16s_6871 | 0.669007804 | -0.872175265 | 3.549013861 | 1.97438446  | 0.961244501 | NA |
| ASV_16s_6872 | 0.658112551 | -0.768727777 | 3.549332779 | 1.963218148 | 0.961848051 | NA |
| ASV_16s_6873 | 0.613659902 | -0.603477885 | 3.378725089 | 1.106193759 | 0.992928911 | NA |
| ASV_16s_6874 | 0.601296569 | -0.981272752 | 3.547797607 | 1.626644315 | 0.977598711 | NA |
| ASV_16s_6875 | 0.755446015 | 0.004340471  | 3.549054189 | 1.671805726 | NA          | NA |
| ASV_16s_6876 | 0.733564728 | 0.651997616  | 3.550181373 | 2.332261226 | 0.939189806 | NA |
| ASV_16s_6877 | 0.544023164 | 0.647041698  | 3.549052097 | 2.020808557 | NA          | NA |
| ASV_16s_6878 | 0.49210004  | 0.15024658   | 3.549034828 | 1.338007206 | NA          | NA |
| ASV_16s_6879 | 1.235704764 | -0.568042207 | 3.549009487 | 1.259241754 | NA          | NA |
| ASV_16s_6880 | 0.588985597 | -0.890449522 | 3.548204306 | 1.363073046 | NA          | NA |
| ASV_16s_6881 | 0.341993283 | 1.335702189  | 3.550283599 | 0.762468166 | NA          | NA |
| ASV_16s_6882 | 0.522465814 | 0.135989993  | 3.549494401 | 1.799555269 | NA          | NA |
| ASV_16s_6883 | 0.622356376 | 0.959481438  | 3.549351236 | 1.764950797 | NA          | NA |
| ASV_16s_6884 | 0.820092805 | 0.748434909  | 3.549459601 | 1.275042834 | NA          | NA |
| ASV_16s_6885 | 0.51728427  | 1.222875279  | 3.550164808 | 0.940331096 | NA          | NA |
| ASV_16s_6886 | 0.790791517 | 0.020419036  | 3.55031465  | 1.901539793 | 0.965088229 | NA |
| ASV_16s_6887 | 0.750446144 | 0.334636434  | 3.550621442 | 1.66798424  | 0.975918269 | NA |
| ASV_16s_6888 | 0.678493391 | 0.631959993  | 3.550235369 | 1.938766911 | 0.963151535 | NA |
| ASV_16s_6889 | 0.85774682  | 0.189678233  | 3.548369211 | 2.132099996 | 0.952168328 | NA |
| ASV_16s_6890 | 0.804286677 | 0.174162023  | 3.549707315 | 3.371158464 | 0.84867789  | NA |
| ASV_16s_6891 | 0.749419587 | 0.166905387  | 3.549483551 | 2.735789305 | 0.908321368 | NA |
| ASV_16s_6892 | 0.734917003 | 0.758461777  | 3.54964113  | 1.949421317 | 0.962586615 | NA |
| ASV_16s_6893 | 0.860449825 | 0.793612578  | 3.54850878  | 1.741688032 | 0.972746351 | NA |
| ASV_16s_6894 | 0.58839774  | 0.552996433  | 3.550662649 | 2.216511644 | 0.946891602 | NA |
| ASV_16s_6895 | 0.584424966 | 0.36042193   | 3.55076783  | 1.523156108 | NA          | NA |
| ASV_16s_6896 | 0.665526018 | 0.315939333  | 3.55069525  | 1.550215609 | 0.9805201   | NA |
| ASV_16s_6897 | 0.628203647 | 0.31593933   | 3.550701658 | 1.520866812 | 0.981578446 | NA |
| ASV_16s_6898 | 0.728007809 | 0.515057233  | 3.550673214 | 2.86186731  | 0.897479762 | NA |
| ASV_16s_6899 | 0.757257909 | 0.981369029  | 3.550535845 | 1.346860724 | 0.987143566 | NA |
| ASV_16s_6900 | 0.399998078 | 0.734680539  | 3.550844661 | 1.266870556 | NA          | NA |
| ASV_16s_6901 | 0.399998078 | 0.734680539  | 3.550844661 | 1.266870556 | NA          | NA |
| ASV_16s_6902 | 0.734322407 | 0.69383474   | 3.550653409 | 1.53473694  | 0.981082643 | NA |
| ASV_16s_6903 | 0.717080111 | 0.693826853  | 3.550655839 | 1.522640676 | 0.981515473 | NA |
| ASV_16s_6904 | 0.536173179 | -0.159684314 | 3.549543816 | 2.0807391   | NA          | NA |
| ASV_16s_6905 | 0.554597552 | -0.230264189 | 3.549498014 | 2.119678527 | 0.952920318 | NA |
| ASV_16s_6906 | 0.602184876 | -0.296028325 | 3.549434    | 2.164138371 | 0.950199648 | NA |
| ASV_16s_6907 | 0.555712864 | -0.278299237 | 3.549487397 | 2.099255057 | 0.954143003 | NA |
| ASV_16s_6908 | 0.527205753 | -0.296766448 | 3.549518506 | 2.033937192 | NA          | NA |
| ASV_16s_6909 | 0.166606191 | -0.169911995 | 3.550666056 | 0.715515299 | NA          | NA |
| ASV_16s_6910 | 0.175671852 | 0.220056998  | 3.550741304 | 0.714390568 | NA          | NA |
| ASV_16s_6911 | 0.175671852 | 0.220056998  | 3.550741304 | 0.714390568 | NA          | NA |
| ASV_16s_6913 | 0.534167694 | 0.176925447  | 3.549046529 | 2.197594509 | NA          | NA |
| ASV_16s_6914 | 0.68087725  | -0.849244307 | 3.548821439 | 1.730657342 | 0.973235452 | NA |
| ASV_16s_6915 | 0.531888086 | -0.238353665 | 3.548726708 | 1.61484998  | NA          | NA |
| ASV_16s_6916 | 0.579812251 | 0.073300952  | 3.548567218 | 2.400063694 | 0.934432527 | NA |
| ASV_16s_6917 | 0.666798852 | -0.827322636 | 3.548586699 | 1.575518579 | 0.979579456 | NA |
| ASV_16s_6918 | 0.698066642 | -0.793401603 | 3.548623831 | 1.936226283 | 0.963285546 | NA |
| ASV_16s_6919 | 0.67313745  | 0.700870646  | 3.547972171 | 2.32676445  | 0.939567589 | NA |
| ASV_16s_6920 | 0.650292731 | -0.792236619 | 3.548852245 | 1.922042223 | 0.964028769 | NA |
| ASV_16s_6921 | 0.713480291 | -0.792817498 | 3.548711752 | 1.997317633 | 0.959988682 | NA |
| ASV_16s_6922 | 0.722862682 | -0.41568968  | 3.547562265 | 2.310809758 | 0.940657374 | NA |
| ASV_16s_6923 | 0.702070856 | -0.854729021 | 3.549107265 | 1.506437316 | 0.982085963 | NA |
| ASV_16s_6924 | 0.590112108 | -0.816321031 | 3.54964567  | 1.981822998 | NA          | NA |
| ASV_16s_6925 | 0.788912453 | -1.288755515 | 3.547199384 | 2.177525522 | 0.949364656 | NA |
| ASV_16s_6926 | 0.5975808   | -0.07892318  | 3.549729038 | 1.858768333 | 0.967241931 | NA |
| ASV_16s_6927 | 0.505407218 | 0.180894405  | 3.550517862 | 0.616726392 | 0.998897002 | NA |
| ASV_16s_6928 | 0.607706677 | 2.307291597  | 3.549205028 | 0.601947318 | 0.99898101  | NA |
| ASV_16s_6929 | 0.38482169  | -0.28638467  | 3.54950247  | 1.468523848 | NA          | NA |
| ASV_16s_6930 | 0.377722895 | 0.100073006  | 3.54949719  | 1.563423599 | NA          | NA |
| ASV_16s_6931 | 0.745522121 | 1.177746331  | 3.29446244  | 1.878097407 | 0.966278105 | NA |
| ASV_16s_6932 | 0.542235148 | -0.069440514 | 3.549644898 | 2.156571326 | NA          | NA |
| ASV_16s_6933 | 0.71112432  | 0.532095652  | 3.550135649 | 2.460188617 | 0.930064947 | NA |
| ASV_16s_6934 | 0.557036742 | -0.109979731 | 3.549200202 | 1.695835548 | NA          | NA |

|              |             |              |             |             |             |    |
|--------------|-------------|--------------|-------------|-------------|-------------|----|
| ASV_16s_6935 | 0.716812801 | 0.31593928   | 3.550687532 | 1.587947745 | 0.9791078   | NA |
| ASV_16s_6936 | 0.715918124 | 0.315939196  | 3.550687657 | 1.587302116 | 0.979132456 | NA |
| ASV_16s_6937 | 0.761214721 | 1.084582689  | 3.550335414 | 1.297819841 | 0.988497553 | NA |
| ASV_16s_6938 | 0.735892492 | 0.693833746  | 3.550653193 | 1.535819846 | 0.981043604 | NA |
| ASV_16s_6939 | 0.694180522 | 0.693815221  | 3.550659252 | 1.506123598 | 0.982096904 | NA |
| ASV_16s_6940 | 0.526656262 | -0.035719148 | 3.549631547 | 1.943825704 | NA          | NA |
| ASV_16s_6941 | 0.518380031 | -0.111487129 | 3.549591742 | 2.01796634  | NA          | NA |
| ASV_16s_6942 | 0.528346672 | -0.208442693 | 3.549536192 | 2.075411771 | NA          | NA |
| ASV_16s_6943 | 0.518477    | -0.207336931 | 3.549549569 | 2.057036634 | NA          | NA |
| ASV_16s_6944 | 0.54533725  | -0.240595274 | 3.549506716 | 2.100161058 | 0.954089126 | NA |
| ASV_16s_6945 | 0.553559537 | -0.38542211  | 3.549479057 | 1.970878323 | 0.96143457  | NA |
| ASV_16s_6946 | 0.525479217 | -0.380394501 | 3.549514079 | 1.929920654 | NA          | NA |
| ASV_16s_6947 | 0.191974323 | 0.020881413  | 3.550664387 | 1.338630972 | NA          | NA |
| ASV_16s_6948 | 0.367123588 | 0.596270767  | 3.550624777 | 1.014510892 | NA          | NA |
| ASV_16s_6949 | 0.548482576 | 0.344096678  | 3.549217537 | 2.049160387 | NA          | NA |
| ASV_16s_6950 | 0.589363547 | 0.1304551    | 3.54883626  | 2.345587409 | 0.938268989 | NA |
| ASV_16s_6951 | 0.628151774 | -0.356688484 | 3.548512924 | 1.951400813 | 0.962481137 | NA |
| ASV_16s_6952 | 0.547043512 | 0.203695882  | 3.548717992 | 2.321108047 | NA          | NA |
| ASV_16s_6953 | 0.577360518 | 0.026845408  | 3.548614996 | 2.283679636 | 0.942487355 | NA |
| ASV_16s_6954 | 0.551928657 | -0.024988245 | 3.548548989 | 2.240953715 | 0.945309854 | NA |
| ASV_16s_6955 | 0.642894121 | -0.741112714 | 3.54831544  | 1.77528059  | 0.971225597 | NA |
| ASV_16s_6956 | 0.693229526 | -0.794277609 | 3.548526713 | 1.731259923 | 0.973208864 | NA |
| ASV_16s_6957 | 0.59050051  | 0.719947167  | 3.549275057 | 1.722665029 | NA          | NA |
| ASV_16s_6958 | 0.55013615  | 0.183694641  | 3.548584753 | 2.464734656 | NA          | NA |
| ASV_16s_6959 | 0.699543373 | -0.793765523 | 3.548545182 | 1.874619913 | 0.966452659 | NA |
| ASV_16s_6960 | 0.653016266 | -0.793111932 | 3.548687956 | 1.866843356 | 0.966841177 | NA |
| ASV_16s_6961 | 0.705686695 | -0.793296455 | 3.548627407 | 1.954113569 | 0.962336322 | NA |
| ASV_16s_6962 | 0.654321109 | -0.792615931 | 3.548777505 | 1.909795581 | 0.964663722 | NA |
| ASV_16s_6963 | 0.663893726 | -0.792240471 | 3.548845338 | 1.944144701 | 0.962866984 | NA |
| ASV_16s_6964 | 0.663635399 | -0.792190871 | 3.548852749 | 1.94510627  | 0.962815978 | NA |
| ASV_16s_6965 | 0.68703724  | -0.791548356 | 3.548973972 | 1.994743271 | 0.960130743 | NA |
| ASV_16s_6966 | 0.581653448 | -0.655812356 | 3.54938562  | 1.78685966  | 0.97069049  | NA |
| ASV_16s_6967 | 0.696418573 | -0.785043984 | 3.54918346  | 2.012245441 | 0.959159501 | NA |
| ASV_16s_6968 | 0.598984536 | -0.951719238 | 3.54864036  | 1.359568076 | 0.986777596 | NA |
| ASV_16s_6969 | 0.681621746 | -0.38173445  | 3.550367397 | 1.250227701 | 0.989724064 | NA |
| ASV_16s_6970 | 0.667370302 | 1.112767046  | 3.550296941 | 1.277578705 | 0.989029629 | NA |
| ASV_16s_6971 | 0.730094377 | 2.341295861  | 3.547829757 | 0.53482892  | 0.999308695 | NA |
| ASV_16s_6972 | 0.478113502 | 1.222619676  | 3.550055435 | 1.195672619 | NA          | NA |
| ASV_16s_6973 | 0.62666239  | 0.278602731  | 3.549311066 | 2.168895856 | NA          | NA |
| ASV_16s_6974 | 0.487543539 | -0.438491032 | 3.549501858 | 1.380125392 | NA          | NA |
| ASV_16s_6975 | 0.345523609 | -0.548760085 | 3.549646735 | 0.778344961 | NA          | NA |
| ASV_16s_6976 | 0.365738416 | 0.219991817  | 3.55065568  | 1.081971307 | 0.993395674 | NA |
| ASV_16s_6977 | 0.37479075  | 0.219990231  | 3.550653765 | 1.09437051  | 0.993159264 | NA |
| ASV_16s_6978 | 0.401868413 | 0.59628807   | 3.550618306 | 1.060342826 | NA          | NA |
| ASV_16s_6979 | 0.620922123 | 0.416138547  | 3.549443147 | 1.670150623 | 0.975828256 | NA |
| ASV_16s_6980 | 0.576927785 | -0.06947298  | 3.549609312 | 2.220534074 | NA          | NA |
| ASV_16s_6981 | 0.5123874   | 0.424021572  | 3.549484785 | 1.787581541 | NA          | NA |
| ASV_16s_6982 | 0.682419947 | 1.120428855  | 3.550026129 | 1.757792876 | 0.972023151 | NA |
| ASV_16s_6983 | 0.63548355  | 0.227668679  | 3.550667293 | 2.731057749 | NA          | NA |
| ASV_16s_6984 | 0.74136784  | 0.225259144  | 3.549656524 | 3.202253463 | NA          | NA |
| ASV_16s_6985 | 0.666960906 | 0.315939363  | 3.550695019 | 1.551295617 | 0.980480485 | NA |
| ASV_16s_6986 | 0.6293111   | 0.315939207  | 3.550701457 | 1.521746205 | 0.981547243 | NA |
| ASV_16s_6987 | 0.71692182  | 0.693826054  | 3.550655861 | 1.522527848 | 0.981519482 | NA |
| ASV_16s_6988 | 0.642274699 | 0.693785345  | 3.550667884 | 1.466622701 | 0.983442736 | NA |
| ASV_16s_6989 | 0.715098021 | 0.693826429  | 3.550656125 | 1.521237501 | 0.981565297 | NA |
| ASV_16s_6990 | 0.642285771 | 0.693785351  | 3.550667882 | 1.466629739 | 0.983442502 | NA |
| ASV_16s_6991 | 0.52930853  | -0.192750143 | 3.549539989 | 2.076653214 | NA          | NA |
| ASV_16s_6992 | 0.546432728 | -0.257202142 | 3.549502203 | 2.095187828 | 0.95438445  | NA |
| ASV_16s_6993 | 0.567748784 | -0.289833813 | 3.549471309 | 2.111622339 | 0.953404658 | NA |
| ASV_16s_6994 | 0.536563371 | -0.3304657   | 3.54950194  | 2.01757896  | 0.958861004 | NA |
| ASV_16s_6995 | 0.545084218 | -0.346074581 | 3.549490152 | 2.013777063 | 0.959073902 | NA |
| ASV_16s_6996 | 0.183760364 | -0.610550596 | 3.550854611 | 0.662702896 | NA          | NA |
| ASV_16s_6997 | 0.16400297  | -0.169902118 | 3.550668591 | 0.707957391 | NA          | NA |
| ASV_16s_6998 | 0.537776455 | -0.052804633 | 3.549295019 | 1.959072808 | 0.96207079  | NA |
| ASV_16s_6999 | 0.581415559 | -0.011417255 | 3.549095095 | 2.086197814 | 0.954915721 | NA |
| ASV_16s_7000 | 0.548613666 | 0.129288905  | 3.548864245 | 2.088963183 | 0.954752654 | NA |
| ASV_16s_7001 | 0.614787955 | -0.590281319 | 3.548698284 | 1.77691688  | 0.971150318 | NA |

|              |             |              |             |             |             |    |
|--------------|-------------|--------------|-------------|-------------|-------------|----|
| ASV_16s_7002 | 0.652253982 | -0.793349695 | 3.548652089 | 1.837284596 | 0.968294875 | NA |
| ASV_16s_7003 | 0.578936618 | 0.581334897  | 3.548508286 | 1.773467312 | NA          | NA |
| ASV_16s_7004 | 0.644856559 | -0.792866874 | 3.548737893 | 1.874177048 | 0.966474852 | NA |
| ASV_16s_7005 | 0.68644708  | -0.792774341 | 3.548730549 | 1.955938875 | NA          | NA |
| ASV_16s_7006 | 0.658328885 | -0.792266142 | 3.548842981 | 1.934122938 | 0.963396287 | NA |
| ASV_16s_7007 | 0.646048811 | -0.791615281 | 3.548976362 | 1.934864577 | 0.963357261 | NA |
| ASV_16s_7008 | 0.713487502 | 0.121518865  | 3.315199071 | 2.59682344  | 0.919631431 | NA |
| ASV_16s_7009 | 0.599390271 | -0.872238249 | 3.549343246 | 1.916498943 | 0.964316947 | NA |
| ASV_16s_7010 | 0.678192252 | -0.886432965 | 3.548258949 | 1.964804727 | 0.961762611 | NA |
| ASV_16s_7011 | 0.708611778 | -0.666273609 | 3.548038022 | 1.677804621 | 0.975508675 | NA |
| ASV_16s_7012 | 0.703177431 | 0.241176547  | 3.550217644 | 1.912202491 | 0.964539425 | NA |
| ASV_16s_7013 | 0.61967942  | 0.219599805  | 3.548563677 | 2.33554012  | NA          | NA |
| ASV_16s_7014 | 0.332611238 | 1.88735909   | 3.550028228 | 0.487514386 | NA          | NA |
| ASV_16s_7015 | 0.769862857 | 1.392519578  | 3.548909739 | 1.543138432 | 0.980778518 | NA |
| ASV_16s_7016 | 0.391464411 | 0.377653918  | 3.551713663 | 0.550494412 | NA          | NA |
| ASV_16s_7017 | 0.36121877  | 0.219992537  | 3.550656672 | 1.075660113 | 0.993513988 | NA |
| ASV_16s_7018 | 0.736101681 | 2.464962147  | 3.548531644 | 1.384179466 | NA          | NA |
| ASV_16s_7019 | 0.54818897  | -1.22106806  | 3.549025491 | 1.130649105 | 0.992437035 | NA |
| ASV_16s_7020 | 0.535156369 | -0.06939348  | 3.549641022 | 2.148208539 | NA          | NA |
| ASV_16s_7021 | 0.468439431 | 1.329032169  | 3.549970116 | 1.427422959 | NA          | NA |
| ASV_16s_7022 | 0.489247067 | 0.363722074  | 3.550225119 | 1.751924954 | NA          | NA |
| ASV_16s_7023 | 0.68825231  | 0.315939113  | 3.550691689 | 1.567252486 | 0.979889629 | NA |
| ASV_16s_7024 | 0.688440944 | 0.315939143  | 3.550691661 | 1.567381507 | 0.97988481  | NA |
| ASV_16s_7025 | 0.686675219 | 0.449435446  | 3.550681861 | 2.766772419 | 0.905707129 | NA |
| ASV_16s_7026 | 0.828225485 | 1.180969069  | 3.549799462 | 1.234993786 | NA          | NA |
| ASV_16s_7027 | 0.801127536 | 1.186777018  | 3.549757985 | 1.216531693 | 0.990541265 | NA |
| ASV_16s_7028 | 0.746461875 | 0.693841895  | 3.550651766 | 1.543070636 | 0.980780983 | NA |
| ASV_16s_7029 | 0.709896247 | 0.693820836  | 3.550656887 | 1.517496679 | 0.981697736 | NA |
| ASV_16s_7030 | 0.754057576 | 0.6938454    | 3.550650765 | 1.548220723 | NA          | NA |
| ASV_16s_7031 | 0.535780081 | -0.131995206 | 3.549557207 | 2.065057496 | 0.956151915 | NA |
| ASV_16s_7032 | 0.544140103 | -0.17087664  | 3.549529234 | 2.098991592 | NA          | NA |
| ASV_16s_7033 | 0.521436391 | -0.198275709 | 3.549548504 | 2.06243557  | NA          | NA |
| ASV_16s_7034 | 0.526005665 | -0.212364501 | 3.549538102 | 2.070770013 | NA          | NA |
| ASV_16s_7035 | 0.516474768 | -0.296869018 | 3.549532628 | 2.013862074 | 0.959069149 | NA |
| ASV_16s_7036 | 0.540600773 | -0.326551958 | 3.549497358 | 2.029193783 | 0.958206887 | NA |
| ASV_16s_7037 | 0.518563231 | -0.364747174 | 3.549523266 | 1.940846678 | NA          | NA |
| ASV_16s_7038 | 0.182301949 | -0.608256049 | 3.550862679 | 0.659945332 | NA          | NA |
| ASV_16s_7041 | 0.584389497 | -0.765875731 | 3.549221214 | 1.710992706 | 0.974094811 | NA |
| ASV_16s_7042 | 0.540130799 | -0.017701415 | 3.549164975 | 2.017038503 | 0.958891305 | NA |
| ASV_16s_7043 | 0.579862784 | 0.043626024  | 3.548679355 | 2.272948614 | 0.943203109 | NA |
| ASV_16s_7044 | 0.522166508 | -0.33963867  | 3.548688921 | 1.417579851 | NA          | NA |
| ASV_16s_7045 | 0.574202427 | -0.881476036 | 3.549137486 | 1.290657431 | 0.988687606 | NA |
| ASV_16s_7046 | 0.681562378 | -0.794093117 | 3.548543971 | 1.760297111 | 0.971909724 | NA |
| ASV_16s_7047 | 0.528666961 | -0.338321353 | 3.54865683  | 1.56947564  | NA          | NA |
| ASV_16s_7048 | 0.650189465 | -0.620103101 | 3.076701179 | 2.468909822 | 0.929419934 | NA |
| ASV_16s_7049 | 0.609142543 | 0.082388254  | 3.548481836 | 2.554263013 | 0.922955881 | NA |
| ASV_16s_7050 | 0.605245411 | -0.752271192 | 3.549282136 | 1.467374719 | NA          | NA |
| ASV_16s_7051 | 0.609591699 | -0.728327982 | 3.549166812 | 1.947717178 | NA          | NA |
| ASV_16s_7052 | 0.662331438 | 0.092074738  | 3.548810936 | 2.464067655 | 0.929778414 | NA |
| ASV_16s_7053 | 0.373607794 | 1.817715105  | 3.549704195 | 0.806526765 | NA          | NA |
| ASV_16s_7054 | 0.672116765 | 0.23590986   | 3.548741217 | 2.060107038 | 0.956438734 | NA |
| ASV_16s_7055 | 0.775110637 | 0.820447744  | 3.550164207 | 0.96720519  | 0.995340357 | NA |
| ASV_16s_7056 | 0.569187553 | -0.655105522 | 3.548682879 | 1.319930216 | NA          | NA |
| ASV_16s_7057 | 0.630404506 | 0.343677068  | 3.549273663 | 2.997780758 | 0.885207454 | NA |
| ASV_16s_7058 | 0.352463656 | 0.21999406   | 3.550658666 | 1.063214729 | 0.993743336 | NA |
| ASV_16s_7059 | 0.381948162 | 0.225280073  | 3.55070505  | 0.872555296 | 0.996631088 | NA |
| ASV_16s_7060 | 0.372845018 | 0.219990672  | 3.55065417  | 1.091718756 | 0.993210267 | NA |
| ASV_16s_7061 | 0.604900413 | 0.310927787  | 3.550696221 | 1.478756147 | 0.98303602  | NA |
| ASV_16s_7062 | 0.395539777 | 0.596285434  | 3.550619401 | 1.052282367 | NA          | NA |
| ASV_16s_7063 | 0.61754632  | 2.143637513  | 3.548643993 | 0.715996159 | 0.998209788 | NA |
| ASV_16s_7064 | 0.349374074 | 2.049170059  | 3.549770157 | 0.42847717  | NA          | NA |
| ASV_16s_7065 | 0.5103778   | -0.04571217  | 3.550672522 | 1.237080893 | 0.990047907 | NA |
| ASV_16s_7066 | 0.914906714 | 0.157495132  | 3.547154262 | 1.808540991 | NA          | NA |
| ASV_16s_7067 | 0.847371516 | 0.409091713  | 3.54891273  | 2.776635464 | 0.904868    | NA |
| ASV_16s_7068 | 0.734327865 | 0.349584379  | 3.549868253 | 2.072036779 | 0.955745833 | NA |
| ASV_16s_7069 | 0.685077624 | 0.345782273  | 3.550688597 | 2.086062682 | 0.954923682 | NA |
| ASV_16s_7070 | 0.695874471 | 0.693813966  | 3.550658991 | 1.50736468  | 0.982053599 | NA |



|              |             |              |             |             |             |    |
|--------------|-------------|--------------|-------------|-------------|-------------|----|
| ASV_16s_7071 | 0.715474698 | 0.693823978  | 3.550656071 | 1.521489743 | 0.981556346 | NA |
| ASV_16s_7072 | 0.721220059 | 0.693825281  | 3.550655246 | 1.525552312 | 0.981411831 | NA |
| ASV_16s_7073 | 0.736460163 | 0.693832054  | 3.550653117 | 1.53618607  | 0.981030391 | NA |
| ASV_16s_7074 | 0.591482049 | 0.693751307  | 3.550677797 | 1.424741288 | NA          | NA |
| ASV_16s_7075 | 0.511936586 | -0.093724896 | 3.549611702 | 1.989549879 | NA          | NA |
| ASV_16s_7076 | 0.512062075 | -0.219837386 | 3.549554704 | 2.04364199  | NA          | NA |
| ASV_16s_7077 | 0.535217891 | -0.267173487 | 3.549514354 | 2.069522734 | 0.955892341 | NA |
| ASV_16s_7078 | 0.562923441 | -0.348051932 | 3.549469077 | 2.042126967 | 0.957471951 | NA |
| ASV_16s_7079 | 0.180843533 | -0.605945127 | 3.550870849 | 0.657172511 | NA          | NA |
| ASV_16s_7080 | 0.180843533 | -0.605945127 | 3.550870849 | 0.657172511 | NA          | NA |
| ASV_16s_7081 | 0.222786555 | 0.220030521  | 3.550706494 | 0.831580754 | 0.997108145 | NA |
| ASV_16s_7083 | 0.544324933 | -0.385820316 | 3.549514833 | 1.64004519  | 0.977061715 | NA |
| ASV_16s_7084 | 0.54165353  | 0.168132139  | 3.54861169  | 2.367277039 | NA          | NA |
| ASV_16s_7085 | 0.552630378 | 0.711869722  | 3.548499725 | 2.038447954 | 0.957681717 | NA |
| ASV_16s_7086 | 0.683508371 | -0.549803242 | 3.547819267 | 1.676455472 | 0.975565183 | NA |
| ASV_16s_7087 | 0.671107597 | -0.920857448 | 3.548349821 | 1.577744219 | 0.979495464 | NA |
| ASV_16s_7088 | 0.546420229 | -0.513024407 | 3.549487501 | 1.78233388  | NA          | NA |
| ASV_16s_7089 | 0.646338409 | -0.829097224 | 3.548821154 | 1.522626552 | 0.981515975 | NA |
| ASV_16s_7090 | 0.800501301 | 0.612548735  | 3.549385574 | 1.260520799 | NA          | NA |
| ASV_16s_7091 | 0.294385322 | -0.301608165 | 3.550581885 | 0.919973212 | NA          | NA |
| ASV_16s_7092 | 0.586640264 | 1.574040674  | 3.54832377  | 1.331560416 | NA          | NA |
| ASV_16s_7093 | 1.137948876 | 0.27147158   | 3.549433078 | 1.235683928 | NA          | NA |
| ASV_16s_7094 | 0.708256943 | 0.598934111  | 3.549603613 | 1.953684493 | NA          | NA |
| ASV_16s_7095 | 0.40740983  | 1.336685799  | 3.550058687 | 0.818727962 | NA          | NA |
| ASV_16s_7096 | 0.617052472 | -0.139616634 | 3.549253277 | 2.125429765 | NA          | NA |
| ASV_16s_7097 | 0.372477317 | 0.219990827  | 3.550654248 | 1.091212363 | NA          | NA |
| ASV_16s_7098 | 0.541074259 | -0.592436006 | 3.549251402 | 1.011262604 | NA          | NA |
| ASV_16s_7099 | 0.561994056 | 2.258063016  | 3.549335547 | 0.543803525 | NA          | NA |
| ASV_16s_7100 | 0.512009253 | 0.815675243  | 3.549399679 | 2.237934409 | NA          | NA |
| ASV_16s_7101 | 0.742167205 | -0.324738005 | 3.548865154 | 2.472430873 | 0.9291587   | NA |
| ASV_16s_7102 | 0.702478123 | 0.349521944  | 3.550753231 | 0.946647388 | 0.995643893 | NA |
| ASV_16s_7103 | 0.691326406 | 1.1911066    | 3.550289667 | 1.724300564 | 0.973515009 | NA |
| ASV_16s_7104 | 0.838415179 | 0.511895133  | 3.550667656 | 2.938503978 | NA          | NA |
| ASV_16s_7105 | 0.685238547 | 0.34955991   | 3.54987704  | 2.030775405 | 0.958117381 | NA |
| ASV_16s_7106 | 0.711964794 | 0.374158269  | 3.550256385 | 1.855313124 | 0.967412577 | NA |
| ASV_16s_7107 | 0.714863392 | 0.315939222  | 3.550687808 | 1.586519813 | 0.979162309 | NA |
| ASV_16s_7108 | 0.605570952 | 0.31593928   | 3.550705931 | 1.502174266 | 0.982234291 | NA |
| ASV_16s_7109 | 0.602148996 | 0.31593928   | 3.550706605 | 1.499292728 | 0.982334135 | NA |
| ASV_16s_7110 | 0.934170236 | 1.114352819  | 3.550417201 | 1.441953774 | 0.984251467 | NA |
| ASV_16s_7111 | 0.672959701 | 0.693801092  | 3.550662622 | 1.490318901 | 0.982642927 | NA |
| ASV_16s_7112 | 0.502118585 | -0.178665432 | 3.549582487 | 2.022757997 | NA          | NA |
| ASV_16s_7113 | 0.508724986 | -0.206254118 | 3.549563323 | 2.038426412 | NA          | NA |
| ASV_16s_7114 | 0.553641777 | -0.240132576 | 3.549496964 | 2.114969367 | NA          | NA |
| ASV_16s_7115 | 0.52043561  | -0.275747942 | 3.549531709 | 2.036914149 | NA          | NA |
| ASV_16s_7116 | 0.179385118 | -0.603598087 | 3.550879121 | 0.654379475 | NA          | NA |
| ASV_16s_7117 | 0.096461531 | -0.169447232 | 3.550781873 | 0.470794417 | NA          | NA |
| ASV_16s_7118 | 0.513258264 | -0.196052102 | 3.549531974 | 2.190435863 | NA          | NA |
| ASV_16s_7119 | 0.510765515 | 0.06902983   | 3.54940029  | 1.955035729 | 0.962287024 | NA |
| ASV_16s_7120 | 0.521180934 | 0.377536655  | 3.549316079 | 2.066177796 | 0.956086867 | NA |
| ASV_16s_7121 | 0.587375188 | -0.138590268 | 3.548991051 | 1.641147813 | 0.977017201 | NA |
| ASV_16s_7122 | 0.551499997 | 0.596765307  | 3.548768099 | 1.861088253 | 0.967127075 | NA |
| ASV_16s_7123 | 0.520370641 | 0.052183332  | 3.548597011 | 2.274388843 | NA          | NA |
| ASV_16s_7124 | 0.605128353 | 0.28590677   | 3.548171787 | 2.028310056 | 0.958256852 | NA |
| ASV_16s_7125 | 0.563481417 | 0.081568441  | 3.548541957 | 2.449561273 | 0.93084702  | NA |
| ASV_16s_7126 | 0.127131172 | 0.728021251  | 3.551402819 | 0.707323352 | NA          | NA |
| ASV_16s_7127 | 0.542212905 | -0.839463536 | 3.549523564 | 1.174518089 | 0.991501826 | NA |
| ASV_16s_7128 | 0.641447775 | -0.792910862 | 3.548730787 | 1.862411105 | 0.967061482 | NA |
| ASV_16s_7129 | 0.64495224  | -0.79256408  | 3.548791372 | 1.895440768 | 0.965400009 | NA |
| ASV_16s_7130 | 0.637541994 | -0.789114072 | 3.549150273 | 1.935710984 | 0.963312693 | NA |
| ASV_16s_7131 | 0.628483353 | -1.328363736 | 3.549138128 | 1.218486489 | 0.990495003 | NA |
| ASV_16s_7132 | 0.595994993 | -0.167691479 | 3.550141874 | 1.857411371 | 0.967309008 | NA |
| ASV_16s_7133 | 0.57782134  | 0.620762286  | 3.547375969 | 1.401963544 | NA          | NA |
| ASV_16s_7134 | 0.621027993 | -0.132759248 | 3.548306311 | 1.954783616 | NA          | NA |
| ASV_16s_7135 | 0.531644141 | -0.414606158 | 3.548778696 | 1.250451924 | 0.989718485 | NA |
| ASV_16s_7136 | 0.795029517 | 0.406883957  | 3.551249252 | 0.613076415 | NA          | NA |
| ASV_16s_7137 | 0.563336883 | 0.330448452  | 3.548686274 | 1.829862902 | 0.968654138 | NA |
| ASV_16s_7138 | 0.830987608 | 0.419244983  | 3.549520597 | 1.067668441 | NA          | NA |

|              |             |              |             |             |             |    |
|--------------|-------------|--------------|-------------|-------------|-------------|----|
| ASV_16s_7139 | 0.37462876  | -0.033327599 | 3.550620696 | 1.135068944 | NA          | NA |
| ASV_16s_7140 | 0.558976431 | -1.945179092 | 3.548245317 | 0.725761202 | 0.998129875 | NA |
| ASV_16s_7141 | 0.447208652 | -0.217339571 | 3.549521082 | 1.789147257 | NA          | NA |
| ASV_16s_7142 | 0.48521067  | 0.094691488  | 3.549424483 | 1.25749496  | NA          | NA |
| ASV_16s_7143 | 0.672562892 | 0.318052334  | 3.55111977  | 0.612009595 | 0.9989243   | NA |
| ASV_16s_7144 | 0.480162158 | 1.881732655  | 3.550059336 | 0.630871226 | NA          | NA |
| ASV_16s_7145 | 0.41840445  | 0.302255726  | 3.550854085 | 0.949546523 | NA          | NA |
| ASV_16s_7146 | 0.745384284 | -0.223162917 | 3.548034822 | 2.653811    | 0.915076691 | NA |
| ASV_16s_7147 | 0.778457774 | 0.37807299   | 3.549618062 | 2.540313385 | 0.924030957 | NA |
| ASV_16s_7148 | 0.677897124 | 0.908936884  | 3.550538286 | 2.399364133 | 0.934482524 | NA |
| ASV_16s_7149 | 0.837334277 | 0.456245995  | 3.55066242  | 3.365794445 | NA          | NA |
| ASV_16s_7150 | 0.651396403 | 0.188835804  | 3.55061006  | 2.486148137 | 0.928136507 | NA |
| ASV_16s_7151 | 0.705543423 | 0.296140127  | 3.549820058 | 2.147655059 | NA          | NA |
| ASV_16s_7152 | 0.701647833 | 0.363410391  | 3.549979073 | 1.179513222 | 0.991390976 | NA |
| ASV_16s_7153 | 0.55724241  | 0.360419297  | 3.550776323 | 1.498900098 | NA          | NA |
| ASV_16s_7154 | 0.6534231   | 0.315939305  | 3.550697254 | 1.540800717 | 0.980863429 | NA |
| ASV_16s_7155 | 0.81316844  | 0.735154559  | 3.550708093 | 1.627356195 | 0.977570371 | NA |
| ASV_16s_7156 | 0.704114068 | 0.693819531  | 3.550657745 | 1.513340022 | 0.981844232 | NA |
| ASV_16s_7157 | 0.497713832 | 0.271581475  | 3.550106722 | 0.969122887 | NA          | NA |
| ASV_16s_7158 | 0.498027556 | -0.169720003 | 3.54959213  | 2.012359356 | NA          | NA |
| ASV_16s_7159 | 0.53696955  | -0.284846433 | 3.549508531 | 2.060983319 | 0.956388038 | NA |
| ASV_16s_7160 | 0.545190097 | -0.357923116 | 3.549489428 | 1.998038588 | 0.959948848 | NA |
| ASV_16s_7161 | 0.177926702 | -0.601270165 | 3.550887509 | 0.651566762 | NA          | NA |
| ASV_16s_7162 | 0.177926702 | -0.601270165 | 3.550887509 | 0.651566762 | NA          | NA |
| ASV_16s_7163 | 0.548458026 | 0.051198778  | 3.548927681 | 2.151361368 | 0.950989782 | NA |
| ASV_16s_7164 | 0.525581809 | 0.251357617  | 3.548939731 | 2.198436774 | NA          | NA |
| ASV_16s_7165 | 0.53394865  | 0.127428034  | 3.548911608 | 2.258033333 | 0.944190321 | NA |
| ASV_16s_7166 | 0.519448517 | 0.046137707  | 3.548860498 | 2.179241847 | 0.949257078 | NA |
| ASV_16s_7167 | 0.640988029 | -0.248201392 | 3.547819341 | 2.10147875  | 0.954010708 | NA |
| ASV_16s_7168 | 0.646923245 | -0.801316079 | 3.549092039 | 1.433019689 | 0.984538369 | NA |
| ASV_16s_7169 | 0.649898731 | -0.792178822 | 3.548861156 | 1.923054045 | 0.963976029 | NA |
| ASV_16s_7170 | 0.582386372 | 1.861088978  | 3.35161279  | 1.675479841 | 0.975605999 | NA |
| ASV_16s_7171 | 0.623432961 | -0.791152505 | 3.549078572 | 1.909570937 | 0.964675311 | NA |
| ASV_16s_7172 | 0.609706982 | -1.00470121  | 3.548581608 | 1.434182413 | NA          | NA |
| ASV_16s_7173 | 0.737003731 | -0.315909564 | 3.547700922 | 2.219536975 | NA          | NA |
| ASV_16s_7174 | 0.494256574 | -0.443326871 | 3.548110649 | 0.75268564  | NA          | NA |
| ASV_16s_7175 | 0.612164283 | -0.361706171 | 3.548881035 | 2.004455736 | 0.959593342 | NA |
| ASV_16s_7176 | 0.571524959 | -0.083590696 | 3.549839256 | 1.620509194 | 0.977842082 | NA |
| ASV_16s_7177 | 0.436628422 | 0.341778285  | 3.550406221 | 0.969294064 | 0.995308774 | NA |
| ASV_16s_7178 | 0.787733519 | 0.79296532   | 3.31781912  | 2.124341909 | 0.952638739 | NA |
| ASV_16s_7179 | 0.588582532 | 0.838998282  | 3.550627509 | 1.488838313 | NA          | NA |
| ASV_16s_7180 | 0.596093927 | -1.874199562 | 3.548208399 | 0.536940086 | NA          | NA |
| ASV_16s_7181 | 0.270528192 | 1.305033507  | 3.550521249 | 0.683458962 | NA          | NA |
| ASV_16s_7182 | 0.231693487 | 0.406290221  | 3.550952753 | 0.654489666 | NA          | NA |
| ASV_16s_7183 | 0.179528507 | 0.383165952  | 3.551273098 | 0.570400021 | NA          | NA |
| ASV_16s_7184 | 0.369442798 | 0.3575327    | 3.550645323 | 1.896175166 | 0.965362549 | NA |
| ASV_16s_7185 | 0.378580957 | 0.555203196  | 3.550517022 | 1.275326683 | 0.989087869 | NA |
| ASV_16s_7186 | 0.645437052 | 0.48895768   | 3.547565169 | 1.920800338 | NA          | NA |
| ASV_16s_7187 | 0.531569883 | -0.069423586 | 3.549671617 | 2.128423636 | 0.952391551 | NA |
| ASV_16s_7188 | 0.545382623 | -0.06941687  | 3.549616864 | 2.171004284 | 0.949772313 | NA |
| ASV_16s_7189 | 0.499515242 | 0.055861664  | 3.549612204 | 2.703122124 | 0.911041625 | NA |
| ASV_16s_7190 | 0.543106537 | -0.399099192 | 3.548748356 | 2.38553254  | 0.935467178 | NA |
| ASV_16s_7191 | 0.607834472 | 0.366200675  | 3.550853999 | 0.997221347 | NA          | NA |
| ASV_16s_7192 | 0.551553054 | -0.107576051 | 3.5499154   | 1.846119051 | NA          | NA |
| ASV_16s_7193 | 0.828774357 | 0.580287087  | 3.548561301 | 2.054139562 | 0.956783133 | NA |
| ASV_16s_7194 | 0.552711984 | 0.360418847  | 3.55077782  | 1.494742954 | NA          | NA |
| ASV_16s_7195 | 0.507874747 | -0.182968092 | 3.549572601 | 2.034708206 | NA          | NA |
| ASV_16s_7196 | 0.517789461 | -0.201276931 | 3.549552463 | 2.055561113 | 0.956701225 | NA |
| ASV_16s_7197 | 0.562884531 | -0.30358057  | 3.54947431  | 2.091424487 | 0.954607252 | NA |
| ASV_16s_7198 | 0.53706994  | -0.307561369 | 3.54950428  | 2.042170037 | 0.957469492 | NA |
| ASV_16s_7199 | 0.618117229 | -0.413941995 | 3.549411073 | 2.023323532 | 0.958538183 | NA |
| ASV_16s_7200 | 0.566273456 | -0.601489686 | 3.549496315 | 1.36693871  | 0.986562447 | NA |
| ASV_16s_7201 | 0.176468287 | -0.598903742 | 3.550896006 | 0.648732546 | NA          | NA |
| ASV_16s_7202 | 0.494324402 | -0.682883769 | 3.549637096 | 0.986499059 | NA          | NA |
| ASV_16s_7203 | 0.248107741 | 0.596176265  | 3.550660657 | 0.81681065  | 0.997268586 | NA |
| ASV_16s_7204 | 0.53523053  | -0.091834242 | 3.54947946  | 2.512711622 | 0.926136829 | NA |
| ASV_16s_7205 | 0.642769856 | -0.794233808 | 3.548819736 | 1.406659393 | 0.98536642  | NA |

|              |             |              |             |             |             |    |
|--------------|-------------|--------------|-------------|-------------|-------------|----|
| ASV_16s_7206 | 0.584934998 | 0.086950468  | 3.548805129 | 2.393589975 | 0.934894482 | NA |
| ASV_16s_7207 | 0.309288022 | 1.533010185  | 3.550363897 | 0.603288202 | NA          | NA |
| ASV_16s_7208 | 0.636757512 | -0.222380434 | 3.548267696 | 1.415846701 | 0.985080944 | NA |
| ASV_16s_7209 | 0.634860753 | -0.881063763 | 3.548513957 | 2.078362582 | 0.955376039 | NA |
| ASV_16s_7210 | 0.565373806 | 0.457457279  | 3.547734733 | 1.359868204 | NA          | NA |
| ASV_16s_7211 | 0.631151935 | -0.791089472 | 3.54908476  | 1.92205968  | 0.964027859 | NA |
| ASV_16s_7212 | 0.637522027 | -0.02004905  | 3.547977358 | 1.907191396 | 0.964797935 | NA |
| ASV_16s_7213 | 0.587954939 | 1.790041416  | 3.54774624  | 1.217942928 | 0.990507881 | NA |
| ASV_16s_7214 | 0.62797247  | -0.721412761 | 3.549568812 | 1.910448427 | 0.964630032 | NA |
| ASV_16s_7215 | 0.605484844 | -0.757471385 | 3.548225614 | 1.665823018 | 0.976007874 | NA |
| ASV_16s_7216 | 0.7779974   | 1.871962408  | 3.548249715 | 1.10309504  | 0.99298975  | NA |
| ASV_16s_7217 | 0.548823937 | -0.124092457 | 3.550461804 | 1.710128988 | 0.974132187 | NA |
| ASV_16s_7218 | 0.655361152 | -0.817939258 | 3.55000296  | 1.05959018  | NA          | NA |
| ASV_16s_7219 | 0.659771499 | -0.271670961 | 3.549655103 | 1.223601995 | 0.990373275 | NA |
| ASV_16s_7220 | 0.674107724 | 0.229350564  | 3.549709567 | 2.677287058 | NA          | NA |
| ASV_16s_7221 | 0.649925691 | 0.322021842  | 3.550589105 | 1.532547668 | 0.98116142  | NA |
| ASV_16s_7222 | 0.545394776 | -0.375737585 | 3.549282856 | 1.577728445 | 0.97949606  | NA |
| ASV_16s_7223 | 0.583413588 | 0.522055549  | 3.547957166 | 1.485812658 | NA          | NA |
| ASV_16s_7224 | 0.529212489 | -0.069482344 | 3.549768082 | 2.071469089 | 0.955778938 | NA |
| ASV_16s_7225 | 0.437002646 | 2.115463037  | 3.549717775 | 0.487718755 | 0.999490219 | NA |
| ASV_16s_7226 | 0.473117651 | -0.564713075 | 3.548824241 | 1.426307744 | 0.984751823 | NA |
| ASV_16s_7227 | 0.712728451 | 0.374248528  | 3.550356159 | 0.86986217  | 0.996663913 | NA |
| ASV_16s_7228 | 0.648472369 | -0.550602622 | 3.549199394 | 0.980679674 | NA          | NA |
| ASV_16s_7229 | 0.81956571  | 0.647527991  | 3.549011968 | 1.958110796 | 0.962122379 | NA |
| ASV_16s_7230 | 0.852631748 | 0.706948182  | 3.549473833 | 2.463082949 | 0.929851206 | NA |
| ASV_16s_7231 | 0.649416724 | 0.355220188  | 3.550024498 | 1.942350497 | 0.962962053 | NA |
| ASV_16s_7232 | 0.727467795 | 0.343438585  | 3.549561854 | 2.249069532 | 0.944779337 | NA |
| ASV_16s_7233 | 0.783499224 | 0.363509527  | 3.549795278 | 1.209482069 | NA          | NA |
| ASV_16s_7234 | 0.633834398 | 0.315939339  | 3.55070065  | 1.525318438 | 0.981420169 | NA |
| ASV_16s_7235 | 0.750971624 | 0.315939189  | 3.550682978 | 1.611573368 | 0.978193777 | NA |
| ASV_16s_7236 | 0.519314473 | -0.168969887 | 3.54956228  | 2.052698129 | 0.956866101 | NA |
| ASV_16s_7237 | 0.489913945 | -0.222166072 | 3.549585942 | 2.000069022 | NA          | NA |
| ASV_16s_7238 | 0.518175658 | -0.26305824  | 3.549537061 | 2.040165518 | 0.957583857 | NA |
| ASV_16s_7239 | 0.499598851 | -0.293553834 | 3.549556698 | 1.98431434  | 0.960703425 | NA |
| ASV_16s_7240 | 0.495812038 | -0.303695153 | 3.54956041  | 1.968421767 | NA          | NA |
| ASV_16s_7241 | 0.581277682 | -0.389851552 | 3.549447805 | 2.009527932 | 0.959311136 | NA |
| ASV_16s_7242 | 0.499408381 | -0.362521859 | 3.549550093 | 1.908320925 | 0.964739757 | NA |
| ASV_16s_7243 | 0.565404344 | -0.420733708 | 3.549467197 | 1.926890966 | 0.963775646 | NA |
| ASV_16s_7244 | 0.175009871 | -0.596520766 | 3.550904613 | 0.645881095 | NA          | NA |
| ASV_16s_7245 | 0.156193304 | -0.169870159 | 3.550676702 | 0.684697122 | NA          | NA |
| ASV_16s_7246 | 0.217738864 | 0.220032776  | 3.550709507 | 0.820101131 | NA          | NA |
| ASV_16s_7247 | 0.520885851 | -0.329762171 | 3.549489228 | 1.774771991 | 0.971248972 | NA |
| ASV_16s_7248 | 0.614133609 | -0.023192968 | 3.549142566 | 1.190723521 | NA          | NA |
| ASV_16s_7249 | 0.499239705 | -0.340095896 | 3.548815169 | 1.313256835 | NA          | NA |
| ASV_16s_7250 | 0.522644983 | 0.00219021   | 3.548629445 | 2.187791592 | 0.948719405 | NA |
| ASV_16s_7251 | 0.603730249 | -0.589080732 | 3.129245002 | 1.595450475 | 0.978820022 | NA |
| ASV_16s_7252 | 0.437832675 | -0.619610437 | 3.549725279 | 1.103659739 | NA          | NA |
| ASV_16s_7253 | 0.528994817 | 0.675448805  | 3.548181909 | 2.10778947  | NA          | NA |
| ASV_16s_7254 | 0.579336382 | 0.599267133  | 3.548061306 | 2.223981819 | 0.946410728 | NA |
| ASV_16s_7255 | 0.614914866 | -0.792178804 | 3.548880308 | 1.861211563 | 0.967120964 | NA |
| ASV_16s_7256 | 0.618315634 | -0.792056966 | 3.54890001  | 1.873191867 | 0.966524194 | NA |
| ASV_16s_7257 | 0.581623566 | 1.601609584  | 3.115793541 | 1.091458293 | 0.993215264 | NA |
| ASV_16s_7258 | 0.589444101 | -0.849388744 | 3.548963509 | 1.605898736 | 0.97841541  | NA |
| ASV_16s_7259 | 0.799186378 | 2.8350973    | 3.547791196 | 0.501463724 | 0.999441104 | NA |
| ASV_16s_7260 | 0.539385564 | -0.073961694 | 3.549742456 | 1.847230679 | 0.967809804 | NA |
| ASV_16s_7261 | 0.358597762 | 0.01104944   | 3.550609409 | 1.089063094 | 0.993261103 | NA |
| ASV_16s_7262 | 0.545731626 | -0.792027569 | 3.549152992 | 0.846958032 | NA          | NA |
| ASV_16s_7263 | 0.448532787 | -0.265706983 | 3.549916533 | 1.187186479 | NA          | NA |
| ASV_16s_7264 | 0.376165119 | -0.293258447 | 3.5505623   | 1.202191679 | 0.990876347 | NA |
| ASV_16s_7265 | 0.318133286 | 1.331825609  | 3.55037378  | 0.738773454 | NA          | NA |
| ASV_16s_7266 | 0.176585417 | 0.381557605  | 3.551293111 | 0.564996469 | NA          | NA |
| ASV_16s_7267 | 0.343926579 | 0.219995665  | 3.55066071  | 1.050752677 | 0.993967756 | NA |
| ASV_16s_7268 | 0.680570836 | 1.218030145  | 3.547953357 | 1.82728142  | NA          | NA |
| ASV_16s_7269 | 0.590457498 | 2.455275863  | 3.50693117  | 0.53415852  | 0.999311545 | NA |
| ASV_16s_7270 | 0.550555926 | 2.148354544  | 3.549189675 | 1.082624052 | NA          | NA |
| ASV_16s_7271 | 0.52036177  | -0.069161823 | 3.549647373 | 2.087733688 | NA          | NA |
| ASV_16s_7272 | 0.52036177  | -0.069161823 | 3.549647373 | 2.087733688 | NA          | NA |

|              |             |              |             |             |             |    |
|--------------|-------------|--------------|-------------|-------------|-------------|----|
| ASV_16s_7273 | 0.692502627 | 1.767346899  | 3.549380205 | 0.736199337 | 0.998041875 | NA |
| ASV_16s_7274 | 0.294336067 | 0.281453646  | 3.551333797 | 0.830075383 | NA          | NA |
| ASV_16s_7275 | 0.704428733 | 0.409535186  | 3.550433711 | 1.727224525 | 0.973386629 | NA |
| ASV_16s_7276 | 0.661686852 | 0.262251307  | 3.549583673 | 2.878633693 | NA          | NA |
| ASV_16s_7277 | 0.681181042 | 0.36130848   | 3.550687624 | 2.275782394 | 0.943014543 | NA |
| ASV_16s_7278 | 0.776745579 | 0.825744872  | 3.549656381 | 2.486151815 | 0.928136232 | NA |
| ASV_16s_7279 | 0.689136109 | 0.315939253  | 3.550691561 | 1.567844496 | 0.979867508 | NA |
| ASV_16s_7280 | 0.568732017 | 1.034138389  | 3.549558714 | 0.909349311 | NA          | NA |
| ASV_16s_7281 | 0.708985872 | 0.98535066   | 3.550539929 | 1.326077391 | 0.987728658 | NA |
| ASV_16s_7282 | 0.718150073 | 0.693829095  | 3.550655688 | 1.523362532 | NA          | NA |
| ASV_16s_7283 | 0.541294814 | -0.114424829 | 3.549559331 | 2.061628964 | NA          | NA |
| ASV_16s_7284 | 0.493470695 | -0.271769032 | 3.54957029  | 1.987627205 | 0.960521996 | NA |
| ASV_16s_7285 | 0.546875726 | -0.329464126 | 3.549489477 | 2.036908544 | 0.957769324 | NA |
| ASV_16s_7286 | 0.628494759 | -0.683742417 | 3.549444944 | 1.063850387 | NA          | NA |
| ASV_16s_7287 | 0.486153751 | -0.682816437 | 3.549652218 | 0.981120857 | NA          | NA |
| ASV_16s_7288 | 0.154891693 | -0.169864497 | 3.550678133 | 0.68074076  | NA          | NA |
| ASV_16s_7289 | 0.149709152 | -0.092355107 | 3.550684802 | 0.958665063 | 0.995468053 | NA |
| ASV_16s_7290 | 0.224732113 | 0.596147314  | 3.550672159 | 0.76756004  | NA          | NA |
| ASV_16s_7291 | 0.504518828 | -0.112451821 | 3.549369256 | 1.861807671 | NA          | NA |
| ASV_16s_7292 | 0.550175993 | -0.216883572 | 3.549069622 | 1.857622651 | 0.967298569 | NA |
| ASV_16s_7293 | 0.497983287 | 0.09218196   | 3.548861048 | 2.150096709 | 0.951067627 | NA |
| ASV_16s_7294 | 0.55717373  | 0.055394914  | 3.548917434 | 1.796376029 | 0.970246514 | NA |
| ASV_16s_7295 | 0.536220339 | 0.080047912  | 3.548616418 | 2.333377753 | 0.939112924 | NA |
| ASV_16s_7296 | 0.554060017 | 0.329576254  | 3.549030773 | 2.088530689 | 0.954778178 | NA |
| ASV_16s_7297 | 0.574208342 | -0.273045773 | 3.548301585 | 2.066363782 | 0.956076063 | NA |
| ASV_16s_7298 | 0.597627448 | -0.793304601 | 3.548723003 | 1.696228509 | NA          | NA |
| ASV_16s_7299 | 0.522055511 | 0.197246806  | 3.548669472 | 2.387795961 | NA          | NA |
| ASV_16s_7300 | 0.662751167 | -0.818133372 | 3.3057284   | 1.832130091 | 0.968544634 | NA |
| ASV_16s_7301 | 0.637939239 | -0.79246209  | 3.548823091 | 1.891125953 | 0.965619643 | NA |
| ASV_16s_7302 | 0.586066317 | 1.117553522  | 3.548355931 | 1.888479931 | NA          | NA |
| ASV_16s_7303 | 0.76671146  | -0.785041704 | 3.333376544 | 2.584348095 | 0.920612789 | NA |
| ASV_16s_7304 | 0.606052688 | -0.819601935 | 3.549184781 | 1.325264184 | NA          | NA |
| ASV_16s_7305 | 0.614581674 | -0.791101747 | 3.549089031 | 1.896310703 | 0.965355633 | NA |
| ASV_16s_7306 | 0.626519197 | -0.35809141  | 3.548698978 | 2.131458436 | 0.952207322 | NA |
| ASV_16s_7307 | 0.54241979  | 0.055636585  | 3.54949612  | 1.773517544 | 0.971306582 | NA |
| ASV_16s_7308 | 0.599945008 | 0.002188806  | 3.549121391 | 2.182231062 | 0.949069431 | NA |
| ASV_16s_7309 | 0.578634989 | -0.815804272 | 3.549400668 | 1.648289756 | 0.976727655 | NA |
| ASV_16s_7310 | 0.614287523 | 0.443374669  | 3.550282148 | 1.913701445 | 0.964461894 | NA |
| ASV_16s_7311 | 0.548461255 | -0.086370979 | 3.549904734 | 1.727161945 | 0.97338938  | NA |
| ASV_16s_7312 | 0.538219817 | 1.339033571  | 3.549869644 | 0.971795787 | NA          | NA |
| ASV_16s_7313 | 0.475128157 | 1.182328118  | 3.550030403 | 1.093318877 | NA          | NA |
| ASV_16s_7314 | 0.662948676 | -0.009453605 | 3.547659669 | 2.083901186 | NA          | NA |
| ASV_16s_7315 | 0.315482176 | 1.330956836  | 3.550382832 | 0.735982917 | NA          | NA |
| ASV_16s_7316 | 0.33987436  | 0.219996294  | 3.550661714 | 1.044738802 | 0.994074194 | NA |
| ASV_16s_7317 | 0.343594868 | 0.219995634  | 3.550660791 | 1.050256499 | 0.993976583 | NA |
| ASV_16s_7318 | 0.346392521 | 0.219995093  | 3.550660109 | 1.054366778 | 0.993903209 | NA |
| ASV_16s_7319 | 0.66623221  | -0.627443978 | 3.549217465 | 1.202405665 | NA          | NA |
| ASV_16s_7320 | 0.67813372  | 1.507902731  | 3.548720861 | 1.798907108 | 0.970127793 | NA |
| ASV_16s_7321 | 0.491398564 | 1.741239174  | 3.550147261 | 0.818875738 | NA          | NA |
| ASV_16s_7322 | 0.63614849  | 0.402244306  | 3.550905706 | 0.923049434 | NA          | NA |
| ASV_16s_7323 | 0.641430136 | 0.723058866  | 3.550632446 | 1.698042626 | 0.97465195  | NA |
| ASV_16s_7324 | 0.682867733 | 0.247986421  | 3.55024939  | 2.691080357 | NA          | NA |
| ASV_16s_7325 | 0.809668558 | 2.272622779  | 3.548812665 | 0.658555706 | NA          | NA |
| ASV_16s_7326 | 0.291883267 | 0.281052416  | 3.551342215 | 0.827118506 | NA          | NA |
| ASV_16s_7327 | 0.250783956 | 0.279705212  | 3.551441207 | 0.772183323 | NA          | NA |
| ASV_16s_7328 | 0.601095177 | 0.323705149  | 3.550740331 | 1.157752925 | 0.991867321 | NA |
| ASV_16s_7329 | 0.77427533  | 1.082703876  | 3.550330819 | 1.715005499 | NA          | NA |
| ASV_16s_7330 | 0.616990644 | 0.315939184  | 3.550703742 | 1.511614853 | 0.981904828 | NA |
| ASV_16s_7331 | 0.585333626 | 0.315939368  | 3.550710033 | 1.484855934 | 0.98282932  | NA |
| ASV_16s_7332 | 0.703579044 | 0.693820589  | 3.550657827 | 1.512929905 | 0.981858648 | NA |
| ASV_16s_7333 | 0.694058934 | 0.693811727  | 3.550659274 | 1.505985342 | 0.982101724 | NA |
| ASV_16s_7334 | 0.493046694 | -0.130106598 | 3.549618717 | 1.983275885 | NA          | NA |
| ASV_16s_7335 | 0.509141235 | -0.257730687 | 3.549550253 | 2.025736402 | 0.958402182 | NA |
| ASV_16s_7336 | 0.487607162 | -0.26222935  | 3.549580564 | 1.981435653 | 0.960860705 | NA |
| ASV_16s_7337 | 0.513454401 | -0.375279376 | 3.54953027  | 1.915861888 | 0.964349984 | NA |
| ASV_16s_7338 | 0.520524189 | -0.411182695 | 3.549522499 | 1.868821533 | NA          | NA |
| ASV_16s_7339 | 0.153590083 | -0.169857328 | 3.550679588 | 0.676756283 | NA          | NA |

|              |             |              |             |             |             |    |
|--------------|-------------|--------------|-------------|-------------|-------------|----|
| ASV_16s_7340 | 0.106757708 | -0.169553719 | 3.550755396 | 0.512977797 | NA          | NA |
| ASV_16s_7341 | 0.214109883 | 0.220034518  | 3.550711761 | 0.811699271 | NA          | NA |
| ASV_16s_7342 | 0.547714699 | -0.532578515 | 3.549448438 | 1.843385508 | 0.967997823 | NA |
| ASV_16s_7343 | 0.518824693 | 0.1240695    | 3.549485626 | 2.063952353 | 0.956216032 | NA |
| ASV_16s_7344 | 0.51989144  | 0.122072507  | 3.549234839 | 2.090459585 | 0.954664283 | NA |
| ASV_16s_7345 | 0.519557238 | 0.111047937  | 3.549094728 | 2.127952078 | 0.952420143 | NA |
| ASV_16s_7346 | 0.607969955 | -0.03094082  | 3.548534938 | 2.306710538 | 0.940935746 | NA |
| ASV_16s_7347 | 0.52962744  | 0.564349313  | 3.54861966  | 2.005211498 | 0.959551361 | NA |
| ASV_16s_7348 | 0.509707322 | -0.332823013 | 3.548724563 | 1.539987036 | NA          | NA |
| ASV_16s_7349 | 0.61330512  | 0.153805397  | 3.548563438 | 2.621967452 | 0.917636269 | NA |
| ASV_16s_7350 | 0.438315096 | 0.58088501   | 3.549039515 | 1.861790149 | NA          | NA |
| ASV_16s_7351 | 0.620856378 | -0.793548096 | 3.548666504 | 1.711528241 | 0.974071621 | NA |
| ASV_16s_7352 | 0.574102195 | -0.359533602 | 3.547924371 | 1.837399524 | 0.968289293 | NA |
| ASV_16s_7353 | 0.5860111   | -0.386523575 | 3.548913413 | 1.758827819 | 0.971976306 | NA |
| ASV_16s_7354 | 0.554311339 | 0.723155797  | 3.548187944 | 1.852775504 | 0.967537587 | NA |
| ASV_16s_7355 | 0.614419303 | -0.792158338 | 3.548862056 | 1.854623324 | 0.967446585 | NA |
| ASV_16s_7356 | 0.62435294  | -0.792357372 | 3.548846669 | 1.870680922 | 0.966649767 | NA |
| ASV_16s_7357 | 0.572636664 | 0.809536459  | 3.547997654 | 1.899224773 | NA          | NA |
| ASV_16s_7358 | 0.599950023 | -0.532580776 | 3.549198575 | 1.810687953 | 0.969571684 | NA |
| ASV_16s_7359 | 0.716715695 | 0.682934683  | 3.548077659 | 1.736136147 | 0.972993155 | NA |
| ASV_16s_7360 | 0.575717947 | -1.862480805 | 3.548348984 | 0.549674268 | NA          | NA |
| ASV_16s_7361 | 0.603575332 | 1.217527094  | 3.548180318 | 0.935611365 | NA          | NA |
| ASV_16s_7362 | 0.831207494 | -1.488629026 | 3.547525082 | 1.918931636 | NA          | NA |
| ASV_16s_7363 | 0.706967566 | -1.07112967  | 3.548144368 | 2.233270384 | NA          | NA |
| ASV_16s_7364 | 0.521601647 | -0.773064433 | 3.549330823 | 1.627129784 | 0.977579387 | NA |
| ASV_16s_7365 | 0.501047147 | -0.217723521 | 3.548733832 | 0.969905171 | NA          | NA |
| ASV_16s_7366 | 0.525333974 | -0.074940686 | 3.549998815 | 1.78157916  | 0.970935213 | NA |
| ASV_16s_7367 | 0.688477485 | 2.074344458  | 3.549390926 | 0.748846087 | 0.997931633 | NA |
| ASV_16s_7368 | 0.426152353 | 1.317778289  | 3.549880853 | 1.339955686 | 0.987339806 | NA |
| ASV_16s_7369 | 0.272997954 | 0.617630453  | 3.550368513 | 1.082852727 | NA          | NA |
| ASV_16s_7370 | 0.173642327 | 0.380218265  | 3.551311616 | 0.55946496  | NA          | NA |
| ASV_16s_7371 | 0.173642327 | 0.380218265  | 3.551311616 | 0.55946496  | NA          | NA |
| ASV_16s_7372 | 0.173642327 | 0.380218265  | 3.551311616 | 0.55946496  | NA          | NA |
| ASV_16s_7373 | 0.338721767 | 0.219996578  | 3.550662005 | 1.043010177 | 0.994104566 | NA |
| ASV_16s_7374 | 0.340195574 | 0.219996297  | 3.550661634 | 1.045210425 | 0.994065891 | NA |
| ASV_16s_7375 | 0.341956854 | 0.219995949  | 3.550661196 | 1.047827524 | 0.994019678 | NA |
| ASV_16s_7376 | 0.354454221 | 0.219993826  | 3.550658207 | 1.06602332  | NA          | NA |
| ASV_16s_7377 | 0.354454221 | 0.219993826  | 3.550658207 | 1.06602332  | NA          | NA |
| ASV_16s_7378 | 0.353746401 | 0.21999395   | 3.550658371 | 1.065010042 | NA          | NA |
| ASV_16s_7379 | 0.493792611 | -0.069622962 | 3.550185811 | 1.840349406 | 0.968145845 | NA |
| ASV_16s_7380 | 0.493164952 | -0.069567335 | 3.550009259 | 1.916266279 | 0.964329015 | NA |
| ASV_16s_7381 | 0.524441715 | -0.059607996 | 3.550014562 | 1.704282373 | 0.974384374 | NA |
| ASV_16s_7382 | 0.510408999 | -0.069470977 | 3.549734463 | 2.066901866 | 0.956044797 | NA |
| ASV_16s_7383 | 0.437065901 | 0.616308429  | 3.549591282 | 1.684037311 | 0.975246642 | NA |
| ASV_16s_7384 | 0.494466538 | 0.165801997  | 3.548803731 | 2.052182247 | 0.956895775 | NA |
| ASV_16s_7385 | 0.65380054  | 0.523696018  | 3.548791691 | 2.710173213 | 0.910457625 | NA |
| ASV_16s_7386 | 0.402638485 | 0.765125858  | 3.550857487 | 1.418579527 | NA          | NA |
| ASV_16s_7387 | 0.645907003 | -0.077402099 | 3.550116393 | 1.726097527 | 0.973436153 | NA |
| ASV_16s_7388 | 0.715850104 | 0.669813496  | 3.549245716 | 1.883390894 | 0.966011428 | NA |
| ASV_16s_7389 | 0.681528126 | 0.343876488  | 3.549678264 | 2.102119511 | 0.953972549 | NA |
| ASV_16s_7390 | 0.634402097 | 0.315939249  | 3.550700548 | 1.525777123 | 0.981403815 | NA |
| ASV_16s_7391 | 0.626956605 | 0.315939248  | 3.550701894 | 1.519743813 | 0.981618247 | NA |
| ASV_16s_7392 | 0.491297342 | -0.187883808 | 3.549595004 | 2.003094946 | NA          | NA |
| ASV_16s_7393 | 0.509744201 | -0.263814775 | 3.54954842  | 2.023657963 | NA          | NA |
| ASV_16s_7394 | 0.483009703 | -0.253325044 | 3.54958917  | 1.976543009 | NA          | NA |
| ASV_16s_7395 | 0.483780755 | -0.265892764 | 3.549585788 | 1.971783931 | 0.961385526 | NA |
| ASV_16s_7396 | 0.526564959 | -0.319726985 | 3.54951594  | 2.010943024 | 0.959232213 | NA |
| ASV_16s_7397 | 0.486847853 | -0.298668382 | 3.549574572 | 1.955091836 | 0.962284024 | NA |
| ASV_16s_7398 | 0.523005335 | -0.392241165 | 3.549517843 | 1.90619079  | 0.964849428 | NA |
| ASV_16s_7399 | 0.170634624 | -0.588800317 | 3.550928958 | 0.637175489 | NA          | NA |
| ASV_16s_7400 | 0.23965973  | 0.145818675  | 3.550671317 | 1.329308993 | 0.987638775 | NA |
| ASV_16s_7401 | 0.160575052 | 0.220068766  | 3.550756777 | 0.671055642 | NA          | NA |
| ASV_16s_7402 | 0.160575052 | 0.220068766  | 3.550756777 | 0.671055642 | NA          | NA |
| ASV_16s_7404 | 0.487537799 | 0.337128149  | 3.549380917 | 1.919584362 | NA          | NA |
| ASV_16s_7405 | 0.521934603 | 0.740467453  | 3.548798891 | 1.745583526 | 0.972572412 | NA |
| ASV_16s_7406 | 0.659862799 | -0.793824304 | 3.548585581 | 1.749934378 | 0.972377394 | NA |
| ASV_16s_7407 | 0.635396406 | -0.67652161  | 3.548653061 | 1.826861056 | 0.968798795 | NA |

|              |             |              |             |             |             |    |
|--------------|-------------|--------------|-------------|-------------|-------------|----|
| ASV_16s_7408 | 0.618182526 | -0.792880921 | 3.548752452 | 1.813775736 | 0.969424968 | NA |
| ASV_16s_7409 | 0.538612588 | 0.315428138  | 3.548840856 | 1.941374625 | NA          | NA |
| ASV_16s_7410 | 0.552865207 | 0.148400565  | 3.548765935 | 2.382538086 | 0.935679371 | NA |
| ASV_16s_7411 | 0.614657953 | -0.79154059  | 3.549002628 | 1.885984097 | 0.965880359 | NA |
| ASV_16s_7412 | 0.640711753 | -0.791771976 | 3.548945372 | 1.921915099 | 0.964035392 | NA |
| ASV_16s_7413 | 0.612012947 | -0.66501741  | 3.54975029  | 1.860466847 | 0.967157862 | NA |
| ASV_16s_7414 | 0.528124816 | -0.866892162 | 3.549594573 | 1.101888884 | NA          | NA |
| ASV_16s_7415 | 0.756688183 | 0.750720403  | 3.549850352 | 1.597468552 | 0.978742221 | NA |
| ASV_16s_7416 | 0.510512637 | -0.384208838 | 3.547826483 | 1.377655392 | NA          | NA |
| ASV_16s_7417 | 0.563268318 | -0.035518536 | 3.549056571 | 1.401135524 | NA          | NA |
| ASV_16s_7418 | 0.655616628 | 1.589681819  | 3.54758332  | 0.705967662 | 0.998289463 | NA |
| ASV_16s_7419 | 0.487181225 | 1.14473853   | 3.548966718 | 1.190355052 | NA          | NA |
| ASV_16s_7420 | 0.558366075 | -1.192851044 | 3.548651467 | 1.930117769 | 0.963606651 | NA |
| ASV_16s_7421 | 0.223895855 | 0.803376145  | 3.55077558  | 0.866162085 | NA          | NA |
| ASV_16s_7422 | 0.476708905 | 0.357328108  | 3.548511485 | 1.220417293 | NA          | NA |
| ASV_16s_7423 | 0.583478711 | 1.41320243   | 3.549718113 | 1.256941309 | NA          | NA |
| ASV_16s_7424 | 0.400799725 | 0.787134008  | 3.549675238 | 0.978808924 | NA          | NA |
| ASV_16s_7425 | 0.436831063 | 0.899246873  | 3.548583116 | 1.053555649 | NA          | NA |
| ASV_16s_7426 | 0.172170781 | 0.379569046  | 3.551320868 | 0.556665718 | NA          | NA |
| ASV_16s_7427 | 0.330248127 | 0.219998271  | 3.550664201 | 1.030165699 | 0.994327133 | NA |
| ASV_16s_7428 | 0.332015405 | 0.219997916  | 3.550663734 | 1.032869747 | 0.994280732 | NA |
| ASV_16s_7429 | 0.33713174  | 0.219996887  | 3.550662409 | 1.040618517 | 0.994146423 | NA |
| ASV_16s_7430 | 0.68975457  | 0.905512897  | 3.548746136 | 1.269541263 | NA          | NA |
| ASV_16s_7431 | 0.474448137 | 1.86956576   | 3.549685067 | 0.887583905 | NA          | NA |
| ASV_16s_7432 | 0.530830677 | -0.068983732 | 3.549672792 | 2.062106802 | NA          | NA |
| ASV_16s_7433 | 0.517176377 | -0.068398134 | 3.549825649 | 1.926048069 | NA          | NA |
| ASV_16s_7434 | 0.670370428 | 0.244022428  | 3.550178631 | 2.687181497 | NA          | NA |
| ASV_16s_7435 | 0.142798172 | 0.281001268  | 3.55165187  | 0.569627681 | NA          | NA |
| ASV_16s_7436 | 0.152827474 | -0.463272979 | 3.551326143 | 0.587544318 | NA          | NA |
| ASV_16s_7437 | 0.469164803 | 1.212915403  | 3.550258225 | 0.907754639 | NA          | NA |
| ASV_16s_7438 | 0.667586419 | 0.471235403  | 3.550556075 | 1.587894093 | 0.97910985  | NA |
| ASV_16s_7439 | 0.530059853 | 0.360416391  | 3.550785685 | 1.473433627 | NA          | NA |
| ASV_16s_7440 | 0.590049347 | 0.315939267  | 3.550709054 | 1.488912772 | 0.982691018 | NA |
| ASV_16s_7441 | 0.646463333 | 0.315939274  | 3.55069844  | 1.535312854 | 0.981061887 | NA |
| ASV_16s_7442 | 0.603149947 | 0.513786482  | 3.550691657 | 2.643098414 | 0.915941837 | NA |
| ASV_16s_7443 | 0.866192317 | 1.187010562  | 3.54970397  | 1.221332076 | 0.990427409 | NA |
| ASV_16s_7444 | 0.808107788 | 1.187051144  | 3.549694449 | 1.187699806 | 0.991207355 | NA |
| ASV_16s_7445 | 0.703783137 | 1.186662444  | 3.549787161 | 1.140071178 | 0.992241934 | NA |
| ASV_16s_7446 | 0.610125394 | 0.693761598  | 3.550673973 | 1.440445355 | 0.98430013  | NA |
| ASV_16s_7447 | 0.700196321 | 0.693819185  | 3.550658338 | 1.510464106 | NA          | NA |
| ASV_16s_7448 | 0.487211772 | -0.190692734 | 3.549600175 | 1.99532368  | NA          | NA |
| ASV_16s_7449 | 0.481209014 | -0.258224063 | 3.549591048 | 1.970605427 | NA          | NA |
| ASV_16s_7450 | 0.49859815  | -0.431067938 | 3.549556108 | 1.79230926  | 0.970436708 | NA |
| ASV_16s_7451 | 0.515665307 | -0.437216031 | 3.549532436 | 1.810141486 | 0.969597608 | NA |
| ASV_16s_7452 | 0.503002293 | -0.46267858  | 3.5495555   | 1.732830394 | 0.9731395   | NA |
| ASV_16s_7453 | 0.169176209 | -0.586157054 | 3.550937158 | 0.634228073 | NA          | NA |
| ASV_16s_7454 | 0.186216087 | 0.086973555  | 3.550670489 | 1.482588829 | 0.982906319 | NA |
| ASV_16s_7455 | 0.503349034 | 0.386526613  | 3.54904434  | 1.908753909 | 0.964717441 | NA |
| ASV_16s_7457 | 0.541319181 | -0.322325076 | 3.548973106 | 1.767871555 | NA          | NA |
| ASV_16s_7458 | 0.575937617 | -0.299062097 | 3.549197501 | 1.55998811  | 0.980159907 | NA |
| ASV_16s_7459 | 0.521148503 | 0.552955752  | 3.548935238 | 1.854747262 | 0.967440476 | NA |
| ASV_16s_7460 | 0.621171236 | -0.793762776 | 3.548663536 | 1.659279358 | 0.976277995 | NA |
| ASV_16s_7461 | 0.591533837 | -0.793282278 | 3.548731033 | 1.664081565 | NA          | NA |
| ASV_16s_7462 | 0.558478775 | -0.774690063 | 3.548081309 | 1.653964236 | NA          | NA |
| ASV_16s_7463 | 0.651327731 | -0.833034748 | 3.547873246 | 1.366639892 | 0.986571211 | NA |
| ASV_16s_7464 | 0.610565446 | 0.126097469  | 3.548861344 | 2.403907597 | 0.934157463 | NA |
| ASV_16s_7465 | 0.545935428 | -0.80486613  | 3.549111552 | 1.415496343 | NA          | NA |
| ASV_16s_7466 | 0.595410865 | -0.762281944 | 3.54940185  | 1.88092331  | 0.966135887 | NA |
| ASV_16s_7467 | 0.603470731 | 0.202148128  | 3.549214254 | 1.914740421 | NA          | NA |
| ASV_16s_7468 | 0.580009179 | 0.220189339  | 3.548404227 | 2.424190861 | NA          | NA |
| ASV_16s_7469 | 0.590972748 | -0.08602124  | 3.548802046 | 1.793332207 | 0.970388932 | NA |
| ASV_16s_7470 | 0.442952305 | -0.217467385 | 3.549705992 | 1.503113709 | 0.982201668 | NA |
| ASV_16s_7471 | 0.559629854 | -0.09106171  | 3.549908015 | 1.710255382 | NA          | NA |
| ASV_16s_7472 | 0.884588233 | 1.043987866  | 3.549484718 | 1.297014251 | NA          | NA |
| ASV_16s_7473 | 0.572489446 | -0.384561686 | 3.548363764 | 1.276573073 | NA          | NA |
| ASV_16s_7474 | 0.742988295 | -0.41003498  | 3.549533785 | 1.27041659  | NA          | NA |
| ASV_16s_7475 | 0.631499231 | 0.666373302  | 3.547244654 | 1.682683222 | NA          | NA |

|              |             |              |             |             |             |    |
|--------------|-------------|--------------|-------------|-------------|-------------|----|
| ASV_16s_7476 | 0.575016188 | 0.396425208  | 3.548308913 | 1.996563814 | NA          | NA |
| ASV_16s_7477 | 0.491457647 | -0.59970324  | 3.549278555 | 1.09385142  | NA          | NA |
| ASV_16s_7478 | 0.573034437 | -1.21544471  | 3.548921451 | 0.773143055 | NA          | NA |
| ASV_16s_7479 | 0.381125324 | 1.336330363  | 3.550140035 | 0.79723148  | NA          | NA |
| ASV_16s_7480 | 0.615798732 | 0.324744871  | 3.550397929 | 0.992469688 | NA          | NA |
| ASV_16s_7481 | 0.170699236 | 0.379073244  | 3.551329126 | 0.553823747 | NA          | NA |
| ASV_16s_7482 | 0.243034598 | 1.283549123  | 3.550615024 | 0.646530563 | NA          | NA |
| ASV_16s_7483 | 0.327250276 | 0.219998901  | 3.550665006 | 1.025538249 | 0.994405982 | NA |
| ASV_16s_7484 | 0.348446522 | 0.219994912  | 3.550659618 | 1.057343278 | NA          | NA |
| ASV_16s_7485 | 0.367060913 | 0.59627124   | 3.550624794 | 1.014346816 | NA          | NA |
| ASV_16s_7486 | 0.360275174 | 0.224084376  | 3.550701889 | 0.847358901 | 0.996930067 | NA |
| ASV_16s_7487 | 0.395265898 | 0.645411748  | 3.55041165  | 0.948928935 | NA          | NA |
| ASV_16s_7488 | 0.4396577   | 0.92017192   | 3.54859785  | 1.013575883 | NA          | NA |
| ASV_16s_7489 | 0.328576086 | 0.286295227  | 3.551185885 | 0.867835143 | NA          | NA |
| ASV_16s_7490 | 0.744539037 | 0.316156578  | 3.547571655 | 1.658946176 | NA          | NA |
| ASV_16s_7491 | 0.622684599 | 0.354752432  | 3.550760902 | 0.848553547 | 0.996916299 | NA |
| ASV_16s_7492 | 0.885245294 | 0.643546521  | 3.549511445 | 2.63986596  | 0.91620208  | NA |
| ASV_16s_7493 | 0.754790504 | 0.901515362  | 3.549795485 | 2.211326405 | 0.947224067 | NA |
| ASV_16s_7494 | 0.750257578 | 0.633224548  | 3.549504894 | 2.339870158 | 0.938664896 | NA |
| ASV_16s_7495 | 0.624022795 | 0.334247484  | 3.550701382 | 1.244547239 | 0.989864779 | NA |
| ASV_16s_7496 | 0.731671978 | 1.186241848  | 3.54988454  | 1.174594152 | 0.991500145 | NA |
| ASV_16s_7497 | 0.46943598  | -0.151998085 | 3.549645312 | 1.948072426 | NA          | NA |
| ASV_16s_7498 | 0.475886135 | -0.285945369 | 3.549593938 | 1.943007974 | 0.962927231 | NA |
| ASV_16s_7499 | 0.517123736 | -0.314971356 | 3.549529014 | 1.99827827  | 0.959935601 | NA |
| ASV_16s_7500 | 0.477203545 | -0.345154981 | 3.5495843   | 1.887953137 | 0.96578065  | NA |
| ASV_16s_7501 | 0.513366732 | -0.450978528 | 3.549538043 | 1.777426937 | 0.97112683  | NA |
| ASV_16s_7502 | 0.167717793 | -0.58349212  | 3.550945472 | 0.631258113 | NA          | NA |
| ASV_16s_7503 | 0.090201535 | 0.774134364  | 3.551897969 | 0.318768555 | 0.999877185 | NA |
| ASV_16s_7504 | 0.159303053 | -0.169883275 | 3.550673384 | 0.694012709 | NA          | NA |
| ASV_16s_7505 | 0.15783018  | 0.22007116   | 3.550759907 | 0.662834919 | NA          | NA |
| ASV_16s_7506 | 0.51639649  | -0.045485684 | 3.549414827 | 1.942889259 | 0.96293352  | NA |
| ASV_16s_7507 | 0.584605867 | -0.485506533 | 3.549352362 | 1.775973625 | 0.971193727 | NA |
| ASV_16s_7508 | 0.501104301 | 0.438525234  | 3.54927506  | 2.016619547 | NA          | NA |
| ASV_16s_7509 | 0.513710536 | -0.54091495  | 3.549456339 | 1.623239679 | 0.977733959 | NA |
| ASV_16s_7510 | 0.586860839 | -0.793287217 | 3.548742507 | 1.659230777 | 0.976279994 | NA |
| ASV_16s_7511 | 0.538192167 | -0.019683414 | 3.548569889 | 2.276049028 | 0.942996784 | NA |
| ASV_16s_7512 | 0.594563148 | -0.793203115 | 3.548730079 | 1.691440757 | 0.974933293 | NA |
| ASV_16s_7513 | 0.644136427 | -0.793620402 | 3.548627863 | 1.770502184 | 0.971444791 | NA |
| ASV_16s_7514 | 0.631732075 | -0.792878984 | 3.548668397 | 1.780711982 | 0.970975291 | NA |
| ASV_16s_7515 | 0.601427018 | -0.793205518 | 3.548727045 | 1.72782106  | NA          | NA |
| ASV_16s_7516 | 0.570105107 | -0.484775522 | 3.550246734 | 1.193761217 | 0.991069836 | NA |
| ASV_16s_7517 | 0.594721066 | -0.626273551 | 3.52669596  | 2.219129711 | 0.946723327 | NA |
| ASV_16s_7518 | 0.588802492 | -0.429381546 | 3.548029782 | 1.710432931 | 0.974119038 | NA |
| ASV_16s_7519 | 0.592928098 | -0.313974507 | 3.548628611 | 2.177885097 | 0.949342128 | NA |
| ASV_16s_7520 | 0.60603863  | -0.788692986 | 3.549172126 | 1.889677096 | 0.965693218 | NA |
| ASV_16s_7521 | 0.593324479 | -0.66831013  | 3.54896397  | 1.433122821 | 0.984535075 | NA |
| ASV_16s_7522 | 0.544612326 | -0.487934169 | 3.549819479 | 1.693815941 | 0.974832282 | NA |
| ASV_16s_7523 | 0.583050512 | -0.953134198 | 3.548906504 | 1.573610126 | NA          | NA |
| ASV_16s_7524 | 0.593963954 | -0.725687311 | 3.549565224 | 1.868140125 | 0.966776565 | NA |
| ASV_16s_7525 | 0.594303917 | 0.683024213  | 3.550616898 | 1.695046863 | 0.974779841 | NA |
| ASV_16s_7526 | 0.507374557 | -0.081602018 | 3.550202272 | 1.692708326 | NA          | NA |
| ASV_16s_7527 | 0.471390749 | -1.60455469  | 3.548201267 | 0.549225062 | NA          | NA |
| ASV_16s_7528 | 0.606403159 | 1.371532547  | 3.548367977 | 1.238363626 | 0.990016593 | NA |
| ASV_16s_7529 | 0.53022801  | 0.413031497  | 3.550892467 | 0.715203081 | NA          | NA |
| ASV_16s_7530 | 0.394515096 | 0.40329028   | 3.550491829 | 0.897123583 | NA          | NA |
| ASV_16s_7531 | 0.80431735  | 0.425465244  | 3.549972711 | 0.790361131 | NA          | NA |
| ASV_16s_7532 | 0.869654068 | -0.299285101 | 3.548932793 | 2.080623822 | NA          | NA |
| ASV_16s_7533 | 0.328266405 | 0.219998679  | 3.550664732 | 1.027101146 | 0.99437943  | NA |
| ASV_16s_7534 | 0.363896595 | 0.596269638  | 3.550625445 | 1.009952407 | NA          | NA |
| ASV_16s_7535 | 0.469479029 | -0.764421895 | 3.549569467 | 0.993440845 | 0.994933652 | NA |
| ASV_16s_7536 | 0.27422085  | 0.299318636  | 3.55163266  | 0.489833192 | NA          | NA |
| ASV_16s_7537 | 0.595210995 | 0.73177375   | 3.550582507 | 1.482130139 | 0.982921872 | NA |
| ASV_16s_7538 | 0.625522535 | 0.250373959  | 3.549690399 | 2.148105674 | NA          | NA |
| ASV_16s_7539 | 0.554736112 | -0.114375854 | 3.549792117 | 1.734227175 | 0.97307772  | NA |
| ASV_16s_7540 | 0.663710861 | 1.335988915  | 3.549543458 | 1.675454141 | 0.975607074 | NA |
| ASV_16s_7541 | 0.150215039 | -0.458340106 | 3.55133658  | 0.581817312 | NA          | NA |
| ASV_16s_7542 | 0.701130216 | 0.259025769  | 3.549443658 | 1.698947006 | 0.974613268 | NA |

|              |             |              |             |             |             |    |
|--------------|-------------|--------------|-------------|-------------|-------------|----|
| ASV_16s_7543 | 0.760787018 | 0.495890259  | 3.549216787 | 2.170389285 | NA          | NA |
| ASV_16s_7544 | 0.733307574 | 0.726393743  | 3.549582915 | 2.054812955 | 0.956744343 | NA |
| ASV_16s_7545 | 0.69254651  | 0.970241929  | 3.549689139 | 1.830227737 | 0.968636531 | NA |
| ASV_16s_7546 | 0.561712601 | 0.342510492  | 3.549652139 | 2.139222942 | 0.951734261 | NA |
| ASV_16s_7547 | 0.709801703 | 0.312266185  | 3.550076564 | 2.365725662 | NA          | NA |
| ASV_16s_7548 | 0.63748152  | 0.363419122  | 3.549990439 | 1.135538336 | 0.992336185 | NA |
| ASV_16s_7549 | 0.57186024  | 0.629422899  | 3.550271359 | 2.234675191 | 0.945718457 | NA |
| ASV_16s_7550 | 0.520999001 | 0.36041539   | 3.550789022 | 1.46465441  | NA          | NA |
| ASV_16s_7551 | 0.585169964 | 0.905074239  | 3.55031443  | 2.264983858 | 0.943731386 | NA |
| ASV_16s_7552 | 0.644551596 | 0.654134853  | 3.550669078 | 1.995414878 | 0.960093708 | NA |
| ASV_16s_7553 | 0.719861424 | 0.735096193  | 3.550725272 | 1.56529441  | NA          | NA |
| ASV_16s_7554 | 0.677993266 | 0.693805414  | 3.550661809 | 1.494048858 | 0.982514973 | NA |
| ASV_16s_7555 | 0.473177496 | -0.130416164 | 3.549650418 | 1.943732544 | NA          | NA |
| ASV_16s_7556 | 0.476577666 | -0.249151207 | 3.54960005  | 1.965240266 | NA          | NA |
| ASV_16s_7557 | 0.465453328 | -0.260454347 | 3.549615877 | 1.937220092 | NA          | NA |
| ASV_16s_7558 | 0.470327153 | -0.334880301 | 3.549595968 | 1.886278778 | NA          | NA |
| ASV_16s_7559 | 0.499004427 | -0.375504868 | 3.549550785 | 1.888650831 | 0.965745281 | NA |
| ASV_16s_7560 | 0.166259377 | -0.580804219 | 3.550953902 | 0.628265122 | NA          | NA |
| ASV_16s_7561 | 0.539381027 | 0.532240506  | 3.54902982  | 2.129549054 | NA          | NA |
| ASV_16s_7562 | 0.533835014 | 0.038718151  | 3.549223866 | 1.803558606 | 0.969908914 | NA |
| ASV_16s_7563 | 0.478902713 | 0.816647964  | 3.548224305 | 0.986509285 | 0.995043234 | NA |
| ASV_16s_7564 | 0.640454588 | -0.374822279 | 3.54825135  | 2.057403896 | NA          | NA |
| ASV_16s_7565 | 0.563968608 | 0.158047765  | 3.548159446 | 2.14929822  | 0.951116744 | NA |
| ASV_16s_7566 | 0.624850806 | 0.118845942  | 3.548999994 | 2.352597205 | 0.937781824 | NA |
| ASV_16s_7567 | 0.538609197 | -0.264693997 | 3.548365799 | 2.0438086   | 0.957375883 | NA |
| ASV_16s_7568 | 0.554025631 | -0.421453587 | 3.332860309 | 1.793274707 | 0.970391619 | NA |
| ASV_16s_7569 | 0.589783647 | -1.518209687 | 3.548281529 | 0.80819083  | 0.997359462 | NA |
| ASV_16s_7570 | 0.647507505 | -0.196140821 | 3.548863632 | 2.424879795 | 0.932646677 | NA |
| ASV_16s_7571 | 0.545183785 | 0.28817437   | 3.548852281 | 1.810117683 | 0.969598737 | NA |
| ASV_16s_7572 | 0.59690963  | 0.633308816  | 3.549673086 | 1.237468452 | 0.990038453 | NA |
| ASV_16s_7573 | 0.529974915 | -0.093611919 | 3.549926824 | 1.594255722 | NA          | NA |
| ASV_16s_7574 | 0.418957663 | -0.587225006 | 3.549698668 | 0.961636677 | NA          | NA |
| ASV_16s_7575 | 0.610897934 | -0.283482659 | 3.550470664 | 1.662098376 | 0.976161844 | NA |
| ASV_16s_7576 | 0.540008006 | 0.352005562  | 3.550881414 | 1.08556645  | NA          | NA |
| ASV_16s_7577 | 0.644130157 | 0.376346619  | 3.550605163 | 1.511009223 | 0.981926072 | NA |
| ASV_16s_7578 | 0.659784083 | 0.159239272  | 3.550653183 | 1.558980405 | 0.980197229 | NA |
| ASV_16s_7579 | 0.515605539 | 1.338834239  | 3.549916582 | 0.95793439  | NA          | NA |
| ASV_16s_7580 | 0.656980943 | 1.907087037  | 3.549062353 | 1.279590443 | NA          | NA |
| ASV_16s_7581 | 0.504664095 | 0.403409714  | 3.55014956  | 0.976399188 | NA          | NA |
| ASV_16s_7582 | 0.449204043 | -0.647760745 | 3.549207197 | 1.201707007 | NA          | NA |
| ASV_16s_7583 | 0.445294442 | 0.41902038   | 3.550046957 | 0.866744542 | NA          | NA |
| ASV_16s_7584 | 0.328132189 | 0.219998719  | 3.550664769 | 1.026886308 | 0.994383085 | NA |
| ASV_16s_7585 | 0.342156895 | 0.219996006  | 3.550661148 | 1.048095772 | 0.994014929 | NA |
| ASV_16s_7586 | 0.512094877 | 0.777057452  | 3.54928379  | 1.554469109 | 0.980363805 | NA |
| ASV_16s_7587 | 0.598209137 | 2.421367887  | 3.54889076  | 0.533504903 | 0.999314317 | NA |
| ASV_16s_7588 | 0.509476531 | 2.278639621  | 3.549240409 | 0.514862239 | NA          | NA |
| ASV_16s_7589 | 0.536355268 | 1.813008077  | 3.5494315   | 1.134820498 | 0.992351045 | NA |
| ASV_16s_7590 | 0.498707009 | -0.069361315 | 3.54967803  | 2.077863665 | 0.955405264 | NA |
| ASV_16s_7591 | 0.487728512 | -0.069302143 | 3.549673409 | 2.057552322 | NA          | NA |
| ASV_16s_7592 | 0.48822403  | -0.069296465 | 3.549671432 | 2.057801344 | NA          | NA |
| ASV_16s_7593 | 0.585345059 | 2.110342135  | 3.54939408  | 0.594949222 | NA          | NA |
| ASV_16s_7594 | 0.646644432 | 1.326802674  | 3.550313171 | 1.066994078 | 0.993674243 | NA |
| ASV_16s_7595 | 0.230282434 | 0.279704528  | 3.551478175 | 0.740974754 | NA          | NA |
| ASV_16s_7596 | 0.391911204 | -0.606555449 | 3.550285514 | 0.90098242  | NA          | NA |
| ASV_16s_7597 | 0.555169006 | 1.009871794  | 3.550305423 | 1.56093281  | NA          | NA |
| ASV_16s_7598 | 0.586866435 | 0.919344273  | 3.550465898 | 1.561832898 | 0.980091474 | NA |
| ASV_16s_7599 | 0.709984586 | 0.378475227  | 3.548529714 | 1.994319502 | 0.960154101 | NA |
| ASV_16s_7600 | 0.726409038 | 0.200220538  | 3.549620714 | 2.394662003 | NA          | NA |
| ASV_16s_7601 | 0.584734147 | 0.343483187  | 3.549633256 | 2.137545651 | 0.951836661 | NA |
| ASV_16s_7602 | 0.718970972 | 0.829644003  | 3.549211748 | 1.401258993 | NA          | NA |
| ASV_16s_7603 | 0.604053771 | 0.363395428  | 3.550063745 | 1.12051438  | 0.992643411 | NA |
| ASV_16s_7604 | 0.650178706 | 0.315939093  | 3.550697807 | 1.538191318 | 0.980957946 | NA |
| ASV_16s_7605 | 0.650408211 | 0.315939332  | 3.550697771 | 1.538362343 | 0.980951759 | NA |
| ASV_16s_7606 | 0.513720717 | 0.688482538  | 3.550683824 | 1.328349991 | NA          | NA |
| ASV_16s_7607 | 0.805786511 | 1.181506108  | 3.549653804 | 1.159307618 | NA          | NA |
| ASV_16s_7608 | 0.481280333 | -0.198109139 | 3.549606755 | 1.983920672 | 0.960724953 | NA |
| ASV_16s_7609 | 0.545871102 | -0.328980976 | 3.549490787 | 2.035563888 | 0.957845767 | NA |



|              |             |              |             |             |             |    |
|--------------|-------------|--------------|-------------|-------------|-------------|----|
| ASV_16s_7610 | 0.480416151 | -0.333558193 | 3.549580039 | 1.907933395 | NA          | NA |
| ASV_16s_7611 | 0.482430009 | -0.347772058 | 3.549576026 | 1.89496129  | 0.965424454 | NA |
| ASV_16s_7612 | 0.501738127 | -0.357077911 | 3.549546924 | 1.920006582 | 0.964134744 | NA |
| ASV_16s_7613 | 0.508186283 | -0.420294851 | 3.549540684 | 1.830016946 | 0.968646704 | NA |
| ASV_16s_7614 | 0.4731813   | -0.468913978 | 3.54960362  | 1.658442528 | 0.976312411 | NA |
| ASV_16s_7615 | 0.199960998 | 0.204770804  | 3.55066781  | 1.675771859 | 0.975593787 | NA |
| ASV_16s_7616 | 0.477851045 | -0.122013282 | 3.549350747 | 1.733715531 | NA          | NA |
| ASV_16s_7617 | 0.471691695 | 0.104987898  | 3.549495819 | 1.908024903 | NA          | NA |
| ASV_16s_7618 | 0.465931061 | 0.066456985  | 3.549310273 | 1.95366787  | NA          | NA |
| ASV_16s_7619 | 0.609766642 | -0.793663957 | 3.548688491 | 1.645323016 | NA          | NA |
| ASV_16s_7620 | 0.57261826  | -0.615775746 | 3.548771517 | 1.72035989  | 0.973687466 | NA |
| ASV_16s_7621 | 0.298916943 | -0.222104846 | 3.549771387 | 1.352284284 | 0.986988135 | NA |
| ASV_16s_7622 | 0.532890781 | -0.102861357 | 3.548590607 | 2.100620221 | 0.954061809 | NA |
| ASV_16s_7623 | 0.601015137 | 0.336501832  | 3.547563126 | 1.834156898 | 0.968446558 | NA |
| ASV_16s_7624 | 0.609911026 | -0.792519516 | 3.548845756 | 1.838840821 | 0.968219251 | NA |
| ASV_16s_7625 | 0.495353276 | -0.675434297 | 3.549459874 | 1.362732576 | NA          | NA |
| ASV_16s_7626 | 0.629593344 | -0.792077117 | 3.548894321 | 1.893085175 | 0.96552001  | NA |
| ASV_16s_7627 | 0.563210525 | -0.791144957 | 3.549105165 | 1.806052558 | NA          | NA |
| ASV_16s_7628 | 0.741771875 | -0.439324921 | 3.548362053 | 2.086316486 | NA          | NA |
| ASV_16s_7629 | 0.556957791 | -0.865576048 | 3.549214516 | 1.574057535 | 0.979634483 | NA |
| ASV_16s_7630 | 0.604171823 | -0.186485559 | 3.550548407 | 0.830583689 | 0.997119165 | NA |
| ASV_16s_7631 | 0.527568871 | 0.399733453  | 3.550758001 | 1.625161028 | 0.977657693 | NA |
| ASV_16s_7632 | 0.492546851 | -0.066274826 | 3.550926065 | 1.038261675 | NA          | NA |
| ASV_16s_7633 | 0.665034713 | 0.26950575   | 3.549807975 | 1.511474993 | 0.981909735 | NA |
| ASV_16s_7634 | 0.58976241  | -0.562233826 | 3.548189385 | 2.120472805 | 0.952872422 | NA |
| ASV_16s_7635 | 0.674548873 | 0.202270537  | 3.549217128 | 1.625485922 | 0.977644781 | NA |
| ASV_16s_7636 | 0.523463471 | -0.676254909 | 3.550161187 | 1.757957076 | 0.972015721 | NA |
| ASV_16s_7637 | 0.602116953 | -0.207270844 | 3.550113202 | 1.234589565 | 0.990108552 | NA |
| ASV_16s_7638 | 0.695988834 | 0.822258838  | 3.549684758 | 1.802302707 | 0.9699681   | NA |
| ASV_16s_7639 | 0.605598163 | 1.204403631  | 3.549631604 | 0.998806667 | NA          | NA |
| ASV_16s_7640 | 0.575667136 | 1.33759645   | 3.549528802 | 1.315833792 | NA          | NA |
| ASV_16s_7641 | 0.61115785  | 1.320380168  | 3.548466133 | 2.072978777 | NA          | NA |
| ASV_16s_7642 | 0.58861529  | 1.060333817  | 3.548268073 | 1.834937537 | 0.968408738 | NA |
| ASV_16s_7643 | 0.570288319 | 0.755233398  | 3.550451421 | 1.066517933 | NA          | NA |
| ASV_16s_7644 | 0.538154209 | 0.003753837  | 3.550943202 | 0.75300339  | NA          | NA |
| ASV_16s_7645 | 0.299575511 | 1.323966769  | 3.550434176 | 0.71850043  | NA          | NA |
| ASV_16s_7646 | 0.268316802 | -0.547641928 | 3.549920762 | 0.697422475 | NA          | NA |
| ASV_16s_7647 | 0.656589417 | 1.655319038  | 3.548771693 | 1.633237836 | NA          | NA |
| ASV_16s_7648 | 0.495995927 | -0.070881989 | 3.549764821 | 1.935636273 | 0.963316628 | NA |
| ASV_16s_7649 | 0.480015144 | 0.452126174  | 3.550147719 | 1.423015189 | NA          | NA |
| ASV_16s_7650 | 0.61106628  | 0.533503535  | 3.550704748 | 2.520463074 | 0.925548309 | NA |
| ASV_16s_7651 | 0.228262413 | 0.279692024  | 3.551482009 | 0.737741948 | NA          | NA |
| ASV_16s_7652 | 0.228262413 | 0.279692024  | 3.551482009 | 0.737741948 | NA          | NA |
| ASV_16s_7653 | 0.66549027  | -0.538488912 | 3.549358552 | 2.010273847 | NA          | NA |
| ASV_16s_7654 | 0.992030458 | 0.98130621   | 2.889862439 | 4.673957346 | 0.699681201 | NA |
| ASV_16s_7655 | 0.602491552 | 1.433448905  | 3.549187777 | 1.769287014 | NA          | NA |
| ASV_16s_7656 | 0.651062809 | 1.120431261  | 3.550031804 | 1.729158447 | 0.973301522 | NA |
| ASV_16s_7657 | 0.869105706 | 0.27015192   | 3.55063874  | 3.131337884 | NA          | NA |
| ASV_16s_7658 | 0.86614119  | 0.61765002   | 3.549527627 | 2.637142351 | 0.916421065 | NA |
| ASV_16s_7659 | 0.651855886 | 0.496534078  | 3.549709348 | 2.029142704 | 0.958209775 | NA |
| ASV_16s_7660 | 0.580673769 | 0.343741575  | 3.549687996 | 2.091039366 | 0.954630019 | NA |
| ASV_16s_7661 | 0.650848033 | 0.343547891  | 3.549623089 | 2.129574    | 0.952321762 | NA |
| ASV_16s_7662 | 0.57742626  | 0.343042048  | 3.549597945 | 2.122236981 | NA          | NA |
| ASV_16s_7663 | 0.626794278 | 0.343916985  | 3.549715652 | 2.033874459 | NA          | NA |
| ASV_16s_7664 | 0.756716053 | 0.34260001   | 3.549470921 | 2.462976312 | NA          | NA |
| ASV_16s_7665 | 0.575531714 | 0.346417943  | 3.550578174 | 1.182649033 | 0.991320928 | NA |
| ASV_16s_7666 | 0.681403518 | 0.683507658  | 3.550728041 | 2.233472384 | NA          | NA |
| ASV_16s_7667 | 0.620265738 | 0.315939284  | 3.550703132 | 1.514257962 | 0.981811941 | NA |
| ASV_16s_7668 | 0.689307873 | 0.315939271  | 3.550691539 | 1.567925086 | 0.979864496 | NA |
| ASV_16s_7669 | 0.551467358 | 0.315939344  | 3.550717566 | 1.454509984 | 0.983842871 | NA |
| ASV_16s_7670 | 0.674219475 | 0.61705443   | 3.54941357  | 2.102898626 | 0.953926129 | NA |
| ASV_16s_7671 | 0.350385913 | 0.734549139  | 3.550882635 | 1.199609226 | NA          | NA |
| ASV_16s_7672 | 0.648692678 | 0.693787985  | 3.550666752 | 1.4715602   | 0.983277943 | NA |
| ASV_16s_7673 | 0.583528569 | 0.693744448  | 3.550679516 | 1.417745857 | 0.985021515 | NA |
| ASV_16s_7674 | 0.467792208 | -0.125343945 | 3.549662426 | 1.92924346  | NA          | NA |
| ASV_16s_7675 | 0.480918075 | -0.221822713 | 3.549599897 | 1.981805518 | 0.960840517 | NA |
| ASV_16s_7676 | 0.510193482 | -0.293393446 | 3.54954194  | 2.004504413 | 0.959590639 | NA |

|              |             |              |             |             |             |    |
|--------------|-------------|--------------|-------------|-------------|-------------|----|
| ASV_16s_7677 | 0.463169361 | -0.331024692 | 3.549608095 | 1.875979771 | NA          | NA |
| ASV_16s_7678 | 0.492757781 | -0.386272262 | 3.54956038  | 1.860438039 | 0.967159289 | NA |
| ASV_16s_7679 | 0.503734552 | -0.397748128 | 3.549544935 | 1.862096234 | 0.967077101 | NA |
| ASV_16s_7680 | 0.47021721  | -0.682671457 | 3.549683254 | 0.970345364 | NA          | NA |
| ASV_16s_7681 | 0.467938277 | -0.682650918 | 3.549687851 | 0.968781275 | NA          | NA |
| ASV_16s_7682 | 0.153712871 | 0.220074904  | 3.550764812 | 0.650290001 | NA          | NA |
| ASV_16s_7683 | 0.505546176 | 0.010947501  | 3.549296087 | 1.978623651 | 0.96101401  | NA |
| ASV_16s_7684 | 0.467450685 | 0.014898578  | 3.549283093 | 1.909947961 | NA          | NA |
| ASV_16s_7685 | 0.508844902 | 0.071157953  | 3.548927848 | 2.107867787 | 0.953629474 | NA |
| ASV_16s_7686 | 0.49684776  | 0.086373725  | 3.548950621 | 2.113383487 | 0.953299005 | NA |
| ASV_16s_7687 | 0.464431471 | -0.037102681 | 3.548979115 | 1.903818376 | NA          | NA |
| ASV_16s_7688 | 0.530625823 | 0.051902136  | 3.549218376 | 1.820579189 | 0.969100295 | NA |
| ASV_16s_7689 | 0.465357388 | 0.083986888  | 3.548917409 | 2.068625516 | NA          | NA |
| ASV_16s_7690 | 0.471116671 | 0.767605283  | 3.548652386 | 1.9366104   | NA          | NA |
| ASV_16s_7691 | 0.496301266 | -0.45931054  | 3.549189788 | 1.697819864 | 0.974661473 | NA |
| ASV_16s_7692 | 0.568295835 | -0.585789465 | 3.549038535 | 1.522625578 | 0.98151601  | NA |
| ASV_16s_7693 | 0.606025566 | -1.58085441  | 3.548462207 | 1.328473655 | 0.987662048 | NA |
| ASV_16s_7694 | 0.55570086  | -0.792376434 | 3.54889226  | 1.713514769 | NA          | NA |
| ASV_16s_7695 | 0.571635716 | -0.791683771 | 3.549000321 | 1.801453648 | 0.970008076 | NA |
| ASV_16s_7696 | 0.568642721 | -0.785472427 | 3.549229017 | 1.833045319 | 0.968500368 | NA |
| ASV_16s_7697 | 0.633814567 | -0.731168832 | 3.548192294 | 1.984504713 | 0.960693011 | NA |
| ASV_16s_7698 | 0.566060543 | -0.756052385 | 3.549457363 | 1.8386984   | 0.968226176 | NA |
| ASV_16s_7699 | 0.591275936 | -0.755916481 | 3.549458645 | 1.698612068 | 0.974627598 | NA |
| ASV_16s_7700 | 0.575757733 | -1.494424579 | 3.548812604 | 0.858421655 | 0.996801028 | NA |
| ASV_16s_7701 | 0.58439772  | -0.84868727  | 3.548980251 | 1.485723914 | 0.982799785 | NA |
| ASV_16s_7702 | 0.569748388 | -0.735344807 | 3.549545282 | 1.840772428 | 0.968125244 | NA |
| ASV_16s_7703 | 0.529855828 | -0.508036562 | 3.550580741 | 0.961163826 | 0.995430927 | NA |
| ASV_16s_7704 | 0.572139534 | 0.606015846  | 3.549761906 | 1.767128252 | NA          | NA |
| ASV_16s_7705 | 0.673010589 | -0.888256568 | 3.548775189 | 2.537187106 | NA          | NA |
| ASV_16s_7706 | 0.576184829 | 0.458845578  | 3.548903596 | 1.757032925 | 0.97205752  | NA |
| ASV_16s_7707 | 0.554588094 | 0.354601101  | 3.551670258 | 0.547181993 | NA          | NA |
| ASV_16s_7708 | 0.560092635 | -0.752348517 | 3.549834913 | 0.824742308 | 0.997183174 | NA |
| ASV_16s_7709 | 0.530914024 | 1.338967803  | 3.549884454 | 0.967346316 | NA          | NA |
| ASV_16s_7710 | 0.437482259 | 0.419011861  | 3.550067144 | 0.861038672 | NA          | NA |
| ASV_16s_7711 | 0.234654095 | 1.276123521  | 3.550646772 | 0.634391853 | NA          | NA |
| ASV_16s_7712 | 0.45190967  | -0.079229712 | 3.550635468 | 1.348860903 | NA          | NA |
| ASV_16s_7713 | 0.403947629 | 1.80670048   | 3.549636767 | 0.997420696 | 0.994870037 | NA |
| ASV_16s_7714 | 0.597296028 | 1.085828134  | 3.549583677 | 1.397773952 | NA          | NA |
| ASV_16s_7715 | 0.797241138 | -0.472926309 | 3.548371485 | 1.872247854 | 0.966571435 | NA |
| ASV_16s_7716 | 0.317245876 | 0.283930496  | 3.551239377 | 0.85593573  | NA          | NA |
| ASV_16s_7717 | 0.683491856 | -0.096655933 | 3.549833946 | 1.879658232 | 0.966199595 | NA |
| ASV_16s_7718 | 0.702551472 | 0.128029007  | 3.550523704 | 1.761466766 | 0.971856656 | NA |
| ASV_16s_7719 | 0.633136147 | 0.343715062  | 3.549645897 | 2.177996071 | 0.949335175 | NA |
| ASV_16s_7720 | 0.761837746 | 1.065660299  | 3.549678837 | 1.72124879  | 0.973648621 | NA |
| ASV_16s_7721 | 0.702486436 | 0.565459309  | 3.550721306 | 2.850882761 | 0.898445556 | NA |
| ASV_16s_7722 | 0.659677624 | 0.31593931   | 3.55069622  | 1.545553974 | 0.980690546 | NA |
| ASV_16s_7723 | 0.571768349 | 0.315939192  | 3.550712946 | 1.472873702 | 0.983233939 | NA |
| ASV_16s_7724 | 0.658937296 | 0.315939362  | 3.550696343 | 1.544976588 | 0.980711595 | NA |
| ASV_16s_7725 | 0.70108243  | 0.735082508  | 3.550729283 | 1.551825063 | NA          | NA |
| ASV_16s_7726 | 0.70108243  | 0.735082508  | 3.550729283 | 1.551825063 | NA          | NA |
| ASV_16s_7727 | 0.627698189 | 0.693775956  | 3.550670575 | 1.454842869 | 0.983831953 | NA |
| ASV_16s_7728 | 0.606674876 | 0.693761687  | 3.550674668 | 1.437522832 | 0.984394156 | NA |
| ASV_16s_7729 | 0.647261307 | 0.693788404  | 3.550667006 | 1.47041834  | 0.983316141 | NA |
| ASV_16s_7730 | 0.453117494 | -0.162910882 | 3.54966834  | 1.918228658 | NA          | NA |
| ASV_16s_7731 | 0.457720992 | -0.21734935  | 3.549639189 | 1.934445965 | NA          | NA |
| ASV_16s_7732 | 0.484382435 | -0.248160899 | 3.549588171 | 1.981290915 | 0.960868604 | NA |
| ASV_16s_7733 | 0.480885255 | -0.251932837 | 3.549592795 | 1.972684435 | 0.961336724 | NA |
| ASV_16s_7734 | 0.463590565 | -0.271877426 | 3.549617099 | 1.926954524 | 0.963772321 | NA |
| ASV_16s_7735 | 0.457012685 | -0.274135035 | 3.549627661 | 1.911807145 | NA          | NA |
| ASV_16s_7736 | 0.489972314 | -0.306653934 | 3.549568657 | 1.954120026 | 0.962335977 | NA |
| ASV_16s_7737 | 0.47938604  | -0.300695765 | 3.549585746 | 1.938344403 | 0.963173839 | NA |
| ASV_16s_7738 | 0.461616183 | -0.330172664 | 3.549610786 | 1.873700458 | 0.966498727 | NA |
| ASV_16s_7739 | 0.529534693 | -0.369464419 | 3.549508864 | 1.953559875 | NA          | NA |
| ASV_16s_7740 | 0.512163125 | -0.368242018 | 3.5495321   | 1.923759871 | 0.963939213 | NA |
| ASV_16s_7741 | 0.505834305 | -0.471527513 | 3.549552471 | 1.713642315 | 0.973979959 | NA |
| ASV_16s_7742 | 0.462754532 | -0.50123055  | 3.549627841 | 1.548760294 | NA          | NA |
| ASV_16s_7743 | 0.161884131 | -0.572595712 | 3.550979885 | 0.619161185 | NA          | NA |

|              |             |              |             |             |             |    |
|--------------|-------------|--------------|-------------|-------------|-------------|----|
| ASV_16s_7744 | 0.161884131 | -0.572595712 | 3.550979885 | 0.619161185 | NA          | NA |
| ASV_16s_7745 | 0.593240552 | -0.683549287 | 3.549487154 | 1.045197671 | NA          | NA |
| ASV_16s_7746 | 0.293527876 | 0.220006718  | 3.550675181 | 0.970434349 | NA          | NA |
| ASV_16s_7748 | 0.502042012 | -0.116755662 | 3.549469985 | 1.897475877 | 0.965296148 | NA |
| ASV_16s_7749 | 0.491498976 | 0.004827707  | 3.549395803 | 2.037497553 | 0.957735815 | NA |
| ASV_16s_7750 | 0.529915988 | -0.654419277 | 3.549328644 | 1.751807028 | 0.972293213 | NA |
| ASV_16s_7751 | 0.465319599 | 0.361138466  | 3.549243203 | 1.86109102  | NA          | NA |
| ASV_16s_7752 | 0.478347938 | 0.763542539  | 3.549055294 | 1.885667889 | NA          | NA |
| ASV_16s_7753 | 0.484780609 | -0.429792225 | 3.550065523 | 1.230955699 | NA          | NA |
| ASV_16s_7754 | 0.597893435 | -0.792769809 | 3.548786768 | 1.776555203 | 0.971166967 | NA |
| ASV_16s_7755 | 0.619444727 | -0.79279466  | 3.548762222 | 1.823087904 | 0.968980086 | NA |
| ASV_16s_7756 | 0.619863994 | 0.62978051   | 3.547795595 | 1.998825347 | 0.959905354 | NA |
| ASV_16s_7757 | 0.60422673  | -0.792683087 | 3.532400326 | 1.872388638 | 0.966564392 | NA |
| ASV_16s_7758 | 0.44830882  | 0.879172654  | 3.548252257 | 0.956533751 | NA          | NA |
| ASV_16s_7759 | 0.535787713 | 0.349541777  | 3.549318449 | 2.132777482 | 0.952127132 | NA |
| ASV_16s_7760 | 0.590524388 | -0.762083466 | 3.549372865 | 1.897569767 | NA          | NA |
| ASV_16s_7761 | 0.589939406 | 0.132980436  | 3.550149697 | 1.953108259 | 0.962390024 | NA |
| ASV_16s_7762 | 0.587850649 | -0.70377223  | 3.549637846 | 1.855174148 | 0.96741943  | NA |
| ASV_16s_7763 | 0.597533837 | 0.178227335  | 3.548219196 | 1.904111627 | 0.964956292 | NA |
| ASV_16s_7764 | 0.681697652 | -0.254011854 | 3.549472688 | 1.905025796 | 0.964909328 | NA |
| ASV_16s_7765 | 0.558240919 | -0.67455595  | 3.550616199 | 0.766594863 | 0.997770107 | NA |
| ASV_16s_7766 | 0.630720393 | 0.249661112  | 3.550156526 | 1.905096897 | 0.964905674 | NA |
| ASV_16s_7767 | 0.546465944 | 0.21990293   | 3.548509508 | 2.286900367 | 0.942271639 | NA |
| ASV_16s_7768 | 0.566010876 | 0.872248558  | 3.548745651 | 1.698099448 | NA          | NA |
| ASV_16s_7769 | 0.562875371 | -0.535561846 | 3.549431896 | 1.246151541 | 0.98982516  | NA |
| ASV_16s_7770 | 0.536046666 | -0.087871989 | 3.54992284  | 1.526795375 | 0.981367479 | NA |
| ASV_16s_7771 | 0.48353516  | -0.677783154 | 3.549565426 | 1.670825961 | NA          | NA |
| ASV_16s_7772 | 0.458645204 | 0.550097561  | 3.548331006 | 1.353832816 | NA          | NA |
| ASV_16s_7773 | 0.544753512 | 1.756131459  | 3.549906872 | 0.783760191 | NA          | NA |
| ASV_16s_7774 | 0.396662061 | 1.969975849  | 3.549977133 | 0.563440018 | NA          | NA |
| ASV_16s_7775 | 0.605263631 | -0.38638972  | 3.547751589 | 1.402951058 | NA          | NA |
| ASV_16s_7776 | 0.373952447 | 0.671921498  | 3.549517052 | 1.283622568 | NA          | NA |
| ASV_16s_7777 | 0.50847609  | -0.024907418 | 3.54935539  | 2.142069313 | 0.951560226 | NA |
| ASV_16s_7778 | 0.522611478 | -0.534040672 | 3.549321745 | 1.704284824 | NA          | NA |
| ASV_16s_7779 | 0.364697509 | 1.336084107  | 3.550196769 | 0.783031424 | NA          | NA |
| ASV_16s_7780 | 0.163341511 | 0.376224924  | 3.551369521 | 0.539282444 | NA          | NA |
| ASV_16s_7781 | 0.322847148 | 0.219999823  | 3.550666216 | 1.018636685 | 0.994522272 | NA |
| ASV_16s_7782 | 0.338866844 | 0.446400215  | 3.550649951 | 1.778537807 | 0.971075636 | NA |
| ASV_16s_7783 | 0.456529922 | 1.741050519  | 3.550142616 | 0.773439194 | NA          | NA |
| ASV_16s_7784 | 0.476614825 | -0.069255204 | 3.549683418 | 2.03030942  | NA          | NA |
| ASV_16s_7785 | 0.492406292 | -0.059441419 | 3.550078278 | 1.49003693  | NA          | NA |
| ASV_16s_7786 | 0.676267623 | 0.23320194   | 3.550138011 | 2.750029648 | 0.907123932 | NA |
| ASV_16s_7787 | 0.658362571 | 0.606266605  | 3.550670399 | 2.421131997 | 0.932917904 | NA |
| ASV_16s_7788 | 0.666945198 | 0.315939171  | 3.550695034 | 1.551107634 | 0.980487384 | NA |
| ASV_16s_7789 | 0.60470501  | 0.315939231  | 3.550706113 | 1.501294596 | 0.982264807 | NA |
| ASV_16s_7790 | 0.52523606  | 0.315939376  | 3.550724065 | 1.429724004 | NA          | NA |
| ASV_16s_7791 | 0.646750632 | 0.64005857   | 3.550669551 | 2.144941136 | NA          | NA |
| ASV_16s_7792 | 0.485569398 | -0.242932087 | 3.549587484 | 1.985606155 | 0.960632733 | NA |
| ASV_16s_7793 | 0.483232533 | -0.25343331  | 3.549588894 | 1.976714851 | 0.961117887 | NA |
| ASV_16s_7794 | 0.449134841 | -0.275605819 | 3.549641052 | 1.894135823 | NA          | NA |
| ASV_16s_7795 | 0.525268034 | -0.380253769 | 3.54951451  | 1.929425341 | 0.963642952 | NA |
| ASV_16s_7796 | 0.51492355  | -0.382374611 | 3.549528469 | 1.907435429 | 0.96478537  | NA |
| ASV_16s_7797 | 0.160425715 | -0.569761418 | 3.550988693 | 0.616067614 | NA          | NA |
| ASV_16s_7798 | 0.47926984  | 0.132327594  | 3.549575122 | 1.928323216 | 0.963700689 | NA |
| ASV_16s_7799 | 0.474913197 | 0.138288543  | 3.549144149 | 2.046920115 | 0.95719782  | NA |
| ASV_16s_7800 | 0.485569655 | 0.42194981   | 3.54870351  | 2.089099696 | NA          | NA |
| ASV_16s_7801 | 0.500046178 | -0.170041695 | 3.548772993 | 1.64879542  | 0.976707074 | NA |
| ASV_16s_7802 | 0.476513831 | -0.380390254 | 3.549329    | 1.657004439 | NA          | NA |
| ASV_16s_7803 | 0.488937093 | -0.065948588 | 3.549919709 | 2.028770233 | NA          | NA |
| ASV_16s_7804 | 0.505211563 | -0.419995612 | 3.549049959 | 1.847476824 | 0.967797747 | NA |
| ASV_16s_7805 | 0.561720678 | -1.274840037 | 3.548722831 | 1.367595478 | 0.986543174 | NA |
| ASV_16s_7806 | 0.609241361 | -0.664215521 | 3.549753039 | 1.861330512 | 0.967115068 | NA |
| ASV_16s_7807 | 0.564692724 | 0.526742626  | 3.549025336 | 1.463876993 | 0.983533954 | NA |
| ASV_16s_7808 | 0.544038547 | 1.962716726  | 3.549756391 | 0.696605077 | NA          | NA |
| ASV_16s_7809 | 0.503800344 | -0.086149885 | 3.549938507 | 1.611397106 | NA          | NA |
| ASV_16s_7810 | 0.49018919  | -0.07649466  | 3.550032176 | 1.703500392 | 0.974417996 | NA |
| ASV_16s_7811 | 0.643713878 | 0.350469567  | 3.549733201 | 1.383487739 | NA          | NA |

|              |             |              |             |              |             |    |
|--------------|-------------|--------------|-------------|--------------|-------------|----|
| ASV_16s_7812 | 0.675713957 | 1.167056579  | 3.549787214 | 1.451616978  | 0.983937571 | NA |
| ASV_16s_7813 | 0.489956136 | 18.34598788  | 3.551930948 | -0.800445982 | NA          | NA |
| ASV_16s_7814 | 0.497514117 | 1.338654789  | 3.549957173 | 0.946399258  | NA          | NA |
| ASV_16s_7815 | 0.517459295 | 1.050439271  | 3.550037286 | 0.983312377  | NA          | NA |
| ASV_16s_7816 | 0.161869965 | 0.37556759   | 3.551377324 | 0.536303127  | NA          | NA |
| ASV_16s_7817 | 0.161869965 | 0.37556759   | 3.551377324 | 0.536303127  | NA          | NA |
| ASV_16s_7818 | 0.313845724 | -0.224869467 | 3.549653444 | 1.119777981  | NA          | NA |
| ASV_16s_7819 | 0.540875214 | 0.974296858  | 3.54976613  | 1.129510338  | NA          | NA |
| ASV_16s_7820 | 0.546002106 | 0.125453791  | 3.548827339 | 1.470380456  | NA          | NA |
| ASV_16s_7821 | 0.286327753 | 0.306110738  | 3.551584061 | 0.45777068   | NA          | NA |
| ASV_16s_7822 | 0.442662413 | 0.738915125  | 3.551212249 | 0.787966409  | NA          | NA |
| ASV_16s_7823 | 0.475277745 | -0.069300555 | 3.549691801 | 2.032119857  | 0.958041217 | NA |
| ASV_16s_7824 | 0.521810928 | 1.554897332  | 3.54913234  | 0.711006529  | NA          | NA |
| ASV_16s_7825 | 0.370115469 | 0.174536026  | 3.550702924 | 1.333435605  | NA          | NA |
| ASV_16s_7826 | 0.821470155 | 0.302824909  | 3.547358125 | 1.742197574  | NA          | NA |
| ASV_16s_7827 | 0.553450633 | 0.342955582  | 3.549607118 | 2.099387988  | NA          | NA |
| ASV_16s_7828 | 0.63504789  | 0.577116853  | 3.550734897 | 2.713340876  | NA          | NA |
| ASV_16s_7829 | 0.599330182 | 0.315939213  | 3.550707179 | 1.496749213  | 0.982421988 | NA |
| ASV_16s_7830 | 0.520504204 | 0.53829457   | 3.550704735 | 2.432625999  | NA          | NA |
| ASV_16s_7831 | 0.688563101 | 0.735071984  | 3.550732077 | 1.542643788  | NA          | NA |
| ASV_16s_7832 | 0.588151491 | 0.693748796  | 3.550678519 | 1.421744632  | 0.984895919 | NA |
| ASV_16s_7833 | 0.444844169 | -0.031041498 | 3.549775729 | 1.779944496  | NA          | NA |
| ASV_16s_7834 | 0.444924026 | -0.129144257 | 3.549701351 | 1.883661382  | NA          | NA |
| ASV_16s_7835 | 0.455875006 | -0.209622483 | 3.549644825 | 1.931169552  | NA          | NA |
| ASV_16s_7836 | 0.450810711 | -0.205698093 | 3.549655037 | 1.920508019  | NA          | NA |
| ASV_16s_7837 | 0.469087217 | -0.23795903  | 3.54961462  | 1.953700426  | 0.962358396 | NA |
| ASV_16s_7838 | 0.464028845 | -0.29816496  | 3.549610909 | 1.90911821   | 0.964698659 | NA |
| ASV_16s_7839 | 0.530223861 | -0.435202298 | 3.549512428 | 1.839087068  | 0.968207275 | NA |
| ASV_16s_7840 | 0.158967299 | -0.566901851 | 3.550997629 | 0.612957944  | NA          | NA |
| ASV_16s_7841 | 0.158967299 | -0.566901851 | 3.550997629 | 0.612957944  | NA          | NA |
| ASV_16s_7842 | 0.158967299 | -0.566901851 | 3.550997629 | 0.612957944  | NA          | NA |
| ASV_16s_7843 | 0.158967299 | -0.566901851 | 3.550997629 | 0.612957944  | NA          | NA |
| ASV_16s_7844 | 0.61747795  | -0.683682493 | 3.54945769  | 1.058089414  | NA          | NA |
| ASV_16s_7845 | 0.47154815  | 0.018240725  | 3.54950746  | 1.922074026  | 0.964027112 | NA |
| ASV_16s_7846 | 0.48580937  | -0.059689286 | 3.549454005 | 1.863651615  | 0.966999905 | NA |
| ASV_16s_7847 | 0.484812031 | 0.388842099  | 3.549008161 | 1.737747087  | 0.972921674 | NA |
| ASV_16s_7848 | 0.452318393 | 0.288034059  | 3.551540148 | 0.643669092  | NA          | NA |
| ASV_16s_7849 | 0.500464943 | -0.360584053 | 3.549664302 | 1.450112269  | NA          | NA |
| ASV_16s_7850 | 0.575011451 | -0.792854863 | 3.548779221 | 1.667993392  | NA          | NA |
| ASV_16s_7851 | 0.61270988  | -0.792934888 | 3.548751955 | 1.796784592  | 0.970227369 | NA |
| ASV_16s_7852 | 0.57703808  | -0.792093891 | 3.548923266 | 1.789890941  | 0.970549479 | NA |
| ASV_16s_7853 | 0.575459753 | -0.783097164 | 3.549249429 | 1.846359639  | 0.967852449 | NA |
| ASV_16s_7854 | 0.555175333 | -0.749454033 | 3.549490757 | 1.822162492  | 0.969024459 | NA |
| ASV_16s_7855 | 0.579924647 | 0.291440191  | 3.550114207 | 1.563508423  | 0.9800292   | NA |
| ASV_16s_7856 | 0.479779184 | -0.392134914 | 3.550331284 | 1.937913264  | NA          | NA |
| ASV_16s_7857 | 0.509178001 | -0.853074851 | 3.549673745 | 1.209173328  | NA          | NA |
| ASV_16s_7858 | 0.652482767 | 0.684247095  | 3.550320293 | 1.23692088   | NA          | NA |
| ASV_16s_7859 | 0.468458998 | 0.878248513  | 3.548733814 | 1.041185768  | NA          | NA |
| ASV_16s_7860 | 0.532340808 | 0.79097827   | 3.550684533 | 0.860296751  | 0.996778812 | NA |
| ASV_16s_7861 | 0.288971068 | 1.31784948   | 3.550466734 | 0.706138887  | NA          | NA |
| ASV_16s_7862 | 0.634904681 | -0.550554991 | 3.549210422 | 0.973798471  | NA          | NA |
| ASV_16s_7863 | 0.307679142 | 0.220003169  | 3.550670642 | 0.994248487  | 0.994920784 | NA |
| ASV_16s_7864 | 0.316156532 | 0.220001282  | 3.550668117 | 1.008012702  | 0.994698243 | NA |
| ASV_16s_7865 | 0.344910686 | 0.596258373  | 3.550629604 | 0.982760458  | NA          | NA |
| ASV_16s_7866 | 0.625814742 | -0.091787214 | 3.109067362 | 2.571746264  | 0.921598304 | NA |
| ASV_16s_7867 | 0.560946543 | -1.204361855 | 3.548589983 | 0.673807229  | NA          | NA |
| ASV_16s_7868 | 0.694467533 | 1.180436716  | 3.549939325 | 1.13942681   | 0.992255376 | NA |
| ASV_16s_7869 | 0.133034195 | 0.281707307  | 3.551669491 | 0.545311093  | NA          | NA |
| ASV_16s_7870 | 0.619447748 | 1.351387259  | 3.549491014 | 1.826936055  | 0.968795185 | NA |
| ASV_16s_7871 | 0.486968274 | -0.029488267 | 3.550686263 | 1.446029281  | NA          | NA |
| ASV_16s_7872 | 0.610613672 | 0.343308465  | 3.549580919 | 2.206614396  | 0.947525248 | NA |
| ASV_16s_7873 | 0.542887887 | 0.315939274  | 3.550719625 | 1.446501917  | 0.984104191 | NA |
| ASV_16s_7874 | 0.599088539 | 1.08950057   | 3.550362422 | 1.177546734  | 0.991434723 | NA |
| ASV_16s_7875 | 0.610503465 | 0.693763791  | 3.550673906 | 1.440677182  | 0.984292657 | NA |
| ASV_16s_7876 | 0.60870841  | 0.693760934  | 3.550674263 | 1.439189164  | 0.984340587 | NA |
| ASV_16s_7877 | 0.465177223 | -0.229019523 | 3.549623316 | 1.947932158  | 0.962665858 | NA |
| ASV_16s_7878 | 0.46581124  | -0.299220172 | 3.549607793 | 1.911891159  | 0.964555516 | NA |

|              |             |              |             |             |             |    |
|--------------|-------------|--------------|-------------|-------------|-------------|----|
| ASV_16s_7879 | 0.487047    | -0.317668118 | 3.549571575 | 1.937751868 | 0.963205108 | NA |
| ASV_16s_7880 | 0.46375611  | -0.344984855 | 3.549606261 | 1.861000938 | 0.967131402 | NA |
| ASV_16s_7881 | 0.47473502  | -0.429449847 | 3.549593271 | 1.751611843 | 0.972301994 | NA |
| ASV_16s_7882 | 0.441101088 | -0.448628784 | 3.549656849 | 1.645000369 | NA          | NA |
| ASV_16s_7883 | 0.475885202 | -0.032862081 | 3.54951811  | 1.849851175 | 0.967681314 | NA |
| ASV_16s_7884 | 0.454194399 | 0.318440285  | 3.549603558 | 1.897796212 | NA          | NA |
| ASV_16s_7885 | 0.449207777 | 0.314582347  | 3.54960779  | 1.887127458 | NA          | NA |
| ASV_16s_7886 | 0.479898242 | 0.281557073  | 3.549163784 | 2.042952941 | 0.957424779 | NA |
| ASV_16s_7887 | 0.519846551 | -0.793196878 | 3.549199863 | 1.576214315 | 0.979553222 | NA |
| ASV_16s_7888 | 0.450715832 | -0.33928753  | 3.54891727  | 1.292372468 | NA          | NA |
| ASV_16s_7889 | 0.592139215 | -0.793004149 | 3.548742114 | 1.702265766 | 0.974471028 | NA |
| ASV_16s_7890 | 0.461190261 | 0.678714031  | 3.548665251 | 1.652631159 | 0.976550616 | NA |
| ASV_16s_7891 | 0.489492536 | 0.839709902  | 3.549007383 | 1.271835168 | NA          | NA |
| ASV_16s_7892 | 0.587339962 | -0.792083085 | 3.548914151 | 1.811144574 | 0.969550013 | NA |
| ASV_16s_7893 | 0.584471515 | -0.791916495 | 3.548950407 | 1.81583718  | 0.969326796 | NA |
| ASV_16s_7894 | 0.485924897 | 0.289454542  | 3.550890996 | 0.793585344 | 0.997508867 | NA |
| ASV_16s_7895 | 0.548727492 | 0.014768682  | 3.54961655  | 1.968943565 | 0.961539235 | NA |
| ASV_16s_7896 | 0.700836944 | 0.290383835  | 3.548435277 | 1.686310367 | 0.975150678 | NA |
| ASV_16s_7897 | 0.513221407 | 0.221784436  | 3.550235527 | 2.030538336 | NA          | NA |
| ASV_16s_7898 | 0.599049803 | -0.118948412 | 3.550229026 | 2.354158186 | 0.937673078 | NA |
| ASV_16s_7899 | 0.533119149 | 0.182306716  | 3.549453099 | 1.629729385 | 0.977475744 | NA |
| ASV_16s_7900 | 0.72511121  | 2.994345809  | 3.547389405 | 0.723293866 | NA          | NA |
| ASV_16s_7901 | 0.262363526 | 0.354555073  | 3.551898566 | 0.437198691 | NA          | NA |
| ASV_16s_7902 | 0.549787344 | 0.39237163   | 3.551480246 | 0.59080493  | NA          | NA |
| ASV_16s_7903 | 0.494827192 | 0.967184319  | 3.549212091 | 2.045649162 | 0.957270602 | NA |
| ASV_16s_7904 | 0.421857892 | 0.418993893  | 3.550109741 | 0.849314477 | NA          | NA |
| ASV_16s_7905 | 0.324415728 | 0.219999601  | 3.550665784 | 1.021068574 | NA          | NA |
| ASV_16s_7906 | 0.361042087 | 0.610293335  | 3.5505051   | 1.051291896 | 0.993958153 | NA |
| ASV_16s_7907 | 0.519855876 | 1.105253445  | 3.112972228 | 2.207645396 | 0.947459426 | NA |
| ASV_16s_7908 | 0.466927266 | -0.06933152  | 3.549726289 | 2.008605243 | 0.959362552 | NA |
| ASV_16s_7909 | 0.483580835 | 0.975062718  | 3.549161976 | 0.965943749 | NA          | NA |
| ASV_16s_7910 | 0.760934116 | 0.572943091  | 3.548428931 | 1.960742453 | 0.961981162 | NA |
| ASV_16s_7911 | 0.664673576 | 0.746577898  | 3.549716517 | 1.806027878 | 0.969792354 | NA |
| ASV_16s_7912 | 0.615731748 | 0.261574586  | 3.549929844 | 2.630995934 | NA          | NA |
| ASV_16s_7913 | 0.535683574 | 0.363314022  | 3.550308581 | 1.094477996 | 0.993157192 | NA |
| ASV_16s_7914 | 0.62190066  | 0.334247572  | 3.550695302 | 1.306062326 | 0.988276425 | NA |
| ASV_16s_7915 | 0.629304543 | 0.315939257  | 3.550701477 | 1.521534179 | 0.981554769 | NA |
| ASV_16s_7916 | 0.556872089 | 0.406143431  | 3.55070579  | 2.372226758 | 0.936407383 | NA |
| ASV_16s_7917 | 0.52438612  | 0.315939295  | 3.550724289 | 1.428873638 | 0.984670433 | NA |
| ASV_16s_7918 | 0.65128079  | 0.771212532  | 3.550087506 | 1.932820734 | 0.963464756 | NA |
| ASV_16s_7919 | 0.511040491 | 0.315939415  | 3.550727862 | 1.415774076 | NA          | NA |
| ASV_16s_7920 | 0.800210989 | 1.180962792  | 3.549778547 | 1.176126231 | NA          | NA |
| ASV_16s_7921 | 0.747533988 | 1.181373287  | 3.549689214 | 1.137474631 | NA          | NA |
| ASV_16s_7922 | 0.605541859 | 0.693760176  | 3.550674901 | 1.436528045 | 0.984426083 | NA |
| ASV_16s_7923 | 0.603932072 | 0.693759108  | 3.550675228 | 1.435169795 | 0.984469612 | NA |
| ASV_16s_7924 | 0.622015028 | 0.693773004  | 3.55067166  | 1.450156689 | 0.983985246 | NA |
| ASV_16s_7925 | 0.45282953  | -0.097121376 | 3.549707034 | 1.874517244 | 0.966457805 | NA |
| ASV_16s_7926 | 0.436827528 | -0.207597959 | 3.549680089 | 1.88992978  | NA          | NA |
| ASV_16s_7927 | 0.466173072 | -0.248376123 | 3.549617104 | 1.943905747 | 0.962879653 | NA |
| ASV_16s_7928 | 0.44140821  | -0.237436787 | 3.549662773 | 1.894958429 | NA          | NA |
| ASV_16s_7929 | 0.447024568 | -0.294441379 | 3.549640912 | 1.876289818 | 0.966368901 | NA |
| ASV_16s_7930 | 0.445280585 | -0.327927388 | 3.549639544 | 1.84189749  | 0.968070418 | NA |
| ASV_16s_7931 | 0.446615107 | -0.417880533 | 3.549640342 | 1.718545517 | 0.973766652 | NA |
| ASV_16s_7932 | 0.525100575 | -0.518606987 | 3.549532467 | 1.605907559 | NA          | NA |
| ASV_16s_7933 | 0.197587331 | 0.155505584  | 3.550697968 | 1.125017644 | 0.992552154 | NA |
| ASV_16s_7934 | 0.201331883 | 0.181997752  | 3.549813472 | 0.947496377 | 0.995631618 | NA |
| ASV_16s_7935 | 0.446866004 | -0.237811777 | 3.549613383 | 1.681519274 | NA          | NA |
| ASV_16s_7936 | 0.124283875 | 0.178733241  | 3.550768545 | 0.517769126 | NA          | NA |
| ASV_16s_7937 | 0.464143241 | -0.070795894 | 3.549325863 | 1.791296555 | 0.970483962 | NA |
| ASV_16s_7938 | 0.56673119  | -0.795564015 | 3.549452544 | 1.599301296 | NA          | NA |
| ASV_16s_7939 | 0.447130541 | -0.339065284 | 3.548913649 | 1.307476041 | NA          | NA |
| ASV_16s_7940 | 0.451718623 | -0.76668128  | 3.549436133 | 1.413928216 | 0.985140832 | NA |
| ASV_16s_7941 | 0.584455613 | -0.816789605 | 3.548897243 | 1.371799514 | 0.986419402 | NA |
| ASV_16s_7942 | 0.534484597 | 0.055844896  | 3.548582405 | 2.348223958 | 0.938085981 | NA |
| ASV_16s_7943 | 0.594362148 | -0.799877105 | 3.548892095 | 1.551299041 | 0.98048036  | NA |
| ASV_16s_7944 | 0.533426843 | -0.850815812 | 3.549057124 | 1.446661457 | NA          | NA |
| ASV_16s_7945 | 0.553047363 | -0.79117522  | 3.549138841 | 1.791031179 | 0.970496338 | NA |

|              |             |              |             |             |             |    |
|--------------|-------------|--------------|-------------|-------------|-------------|----|
| ASV_16s_7946 | 0.505960818 | -1.048054939 | 3.549122571 | 1.302334089 | 0.988376766 | NA |
| ASV_16s_7947 | 0.52727382  | -0.849954262 | 3.54918673  | 1.642425549 | NA          | NA |
| ASV_16s_7948 | 0.48795646  | -0.297774625 | 3.550001179 | 1.523492072 | NA          | NA |
| ASV_16s_7949 | 0.503589815 | -1.013795298 | 3.549309503 | 1.651627986 | NA          | NA |
| ASV_16s_7950 | 0.559478367 | -0.653832187 | 3.549701322 | 1.425828822 | 0.984766985 | NA |
| ASV_16s_7951 | 0.603472912 | 0.249706631  | 3.550692331 | 1.009895511 | 0.994667325 | NA |
| ASV_16s_7952 | 0.471620773 | -0.653698267 | 3.55029433  | 0.991769035 | 0.994960223 | NA |
| ASV_16s_7953 | 0.214703487 | -0.403074042 | 3.551156138 | 0.730034049 | NA          | NA |
| ASV_16s_7954 | 0.605900738 | 1.787202177  | 3.549059897 | 1.415926149 | NA          | NA |
| ASV_16s_7955 | 0.506308634 | -0.079275498 | 3.550622466 | 1.406546279 | NA          | NA |
| ASV_16s_7956 | 0.302036896 | 0.220004544  | 3.550672403 | 0.984860263 | 0.995069078 | NA |
| ASV_16s_7957 | 0.303510703 | 0.220004198  | 3.550671937 | 0.987324572 | 0.995030425 | NA |
| ASV_16s_7958 | 0.410549903 | -0.352928214 | 3.550270219 | 0.686206346 | 0.99843949  | NA |
| ASV_16s_7959 | 0.394575905 | 0.665604837  | 3.54934697  | 1.546933253 | NA          | NA |
| ASV_16s_7960 | 0.582250861 | 0.717739759  | 3.549619512 | 2.116521113 | 0.95311046  | NA |
| ASV_16s_7961 | 0.48339313  | -0.069333154 | 3.549676512 | 2.046961767 | 0.957195434 | NA |
| ASV_16s_7962 | 0.430248124 | -0.122268111 | 3.549363382 | 1.582442827 | NA          | NA |
| ASV_16s_7963 | 0.578621281 | 0.665387208  | 3.549661739 | 1.70704014  | NA          | NA |
| ASV_16s_7964 | 0.579857218 | 1.717745632  | 3.549336129 | 1.107038231 | NA          | NA |
| ASV_16s_7965 | 0.216142285 | 0.279614871  | 3.551506145 | 0.717753225 | NA          | NA |
| ASV_16s_7966 | 0.216142285 | 0.279614871  | 3.551506145 | 0.717753225 | NA          | NA |
| ASV_16s_7967 | 0.573442508 | -0.55032122  | 3.54926649  | 0.941012969 | NA          | NA |
| ASV_16s_7968 | 0.567615583 | -0.116332781 | 3.549993895 | 1.832394857 | 0.968531832 | NA |
| ASV_16s_7969 | 0.652491723 | 0.69802397   | 3.550736069 | 2.02981412  | NA          | NA |
| ASV_16s_7970 | 0.539122515 | 0.315939317  | 3.55072055  | 1.442946183 | 0.984219402 | NA |
| ASV_16s_7971 | 0.519654264 | 0.315939316  | 3.550725536 | 1.424257955 | 0.984816654 | NA |
| ASV_16s_7972 | 0.598310309 | 0.693754716  | 3.55067638  | 1.430425007 | 0.984621097 | NA |
| ASV_16s_7973 | 0.574722914 | 0.693739083  | 3.550681468 | 1.409960176 | 0.985264239 | NA |
| ASV_16s_7974 | 0.35547562  | 0.794285373  | 3.550081725 | 1.00099058  | 0.994812541 | NA |
| ASV_16s_7975 | 0.439752359 | -0.117152168 | 3.549718649 | 1.864005348 | NA          | NA |
| ASV_16s_7976 | 0.44279664  | -0.127005891 | 3.549706701 | 1.877532518 | NA          | NA |
| ASV_16s_7977 | 0.443055559 | -0.133945502 | 3.549702131 | 1.882493973 | NA          | NA |
| ASV_16s_7978 | 0.441903567 | -0.264138144 | 3.549656331 | 1.885038396 | 0.96592819  | NA |
| ASV_16s_7979 | 0.480840488 | -0.301506737 | 3.549583414 | 1.940424503 | 0.963063956 | NA |
| ASV_16s_7980 | 0.444256653 | -0.355966453 | 3.549640068 | 1.807170047 | 0.969738352 | NA |
| ASV_16s_7981 | 0.477844801 | -0.379606324 | 3.549583195 | 1.842085439 | 0.968061254 | NA |
| ASV_16s_7982 | 0.451474307 | -0.461131108 | 3.549640564 | 1.635064107 | NA          | NA |
| ASV_16s_7983 | 0.154592053 | -0.558171535 | 3.551025227 | 0.603504888 | NA          | NA |
| ASV_16s_7984 | 0.205737921 | 0.114368167  | 3.550664094 | 1.594729184 | 0.978847789 | NA |
| ASV_16s_7986 | 0.294502798 | 0.596221156  | 3.550643237 | 0.902829258 | 0.996247539 | NA |
| ASV_16s_7987 | 0.474945106 | 0.151973788  | 3.549067672 | 2.121976289 | 0.952781689 | NA |
| ASV_16s_7988 | 0.470329734 | 0.49430964   | 3.549246585 | 1.941052286 | 0.963030758 | NA |
| ASV_16s_7989 | 0.473344699 | 0.4765967    | 3.548699155 | 1.775850631 | NA          | NA |
| ASV_16s_7990 | 0.462856282 | 0.713161299  | 3.54961387  | 1.40119931  | NA          | NA |
| ASV_16s_7991 | 0.590832282 | -1.447967315 | 3.54880329  | 1.126179703 | 0.99252849  | NA |
| ASV_16s_7992 | 0.520858332 | -0.810374196 | 3.549380944 | 1.367339305 | NA          | NA |
| ASV_16s_7993 | 0.514966247 | 0.645791961  | 3.547992608 | 1.922459567 | NA          | NA |
| ASV_16s_7994 | 0.57691387  | -0.916504071 | 3.548789971 | 1.48232461  | 0.982915279 | NA |
| ASV_16s_7995 | 0.535557589 | -0.786302484 | 3.549241797 | 1.772750058 | 0.971341795 | NA |
| ASV_16s_7996 | 0.544458523 | -0.78031144  | 3.549295591 | 1.796690556 | 0.970231776 | NA |
| ASV_16s_7997 | 0.550077199 | -0.766278947 | 3.549392719 | 1.813094152 | 0.969457388 | NA |
| ASV_16s_7998 | 0.572169925 | -0.768689485 | 3.549364342 | 1.846806385 | 0.967830581 | NA |
| ASV_16s_7999 | 0.556809383 | 1.293843233  | 3.547898439 | 1.389161079 | 0.985900939 | NA |
| ASV_16s_8000 | 0.467592683 | -0.116135807 | 3.550516675 | 1.575129395 | NA          | NA |
| ASV_16s_8001 | 0.488326401 | 0.102737872  | 3.549646632 | 1.964995135 | 0.96175235  | NA |
| ASV_16s_8002 | 0.673402139 | 0.547414612  | 3.550703815 | 2.932715712 | NA          | NA |
| ASV_16s_8003 | 0.408862911 | -0.569901244 | 3.549598447 | 0.979863533 | NA          | NA |
| ASV_16s_8004 | 0.509458505 | 0.132287539  | 3.549675558 | 1.818013347 | 0.969222968 | NA |
| ASV_16s_8005 | 0.305451283 | -0.365162387 | 3.549703349 | 1.124381937 | NA          | NA |
| ASV_16s_8006 | 0.429722808 | 0.579603521  | 3.549875304 | 1.359121466 | NA          | NA |
| ASV_16s_8007 | 0.19454969  | 0.3908764    | 3.551170703 | 0.596381068 | NA          | NA |
| ASV_16s_8008 | 0.155983785 | 0.372883363  | 3.551409734 | 0.524191282 | NA          | NA |
| ASV_16s_8009 | 0.260684028 | 0.124250021  | 3.549815068 | 1.608859437 | NA          | NA |
| ASV_16s_8010 | 0.353206841 | 0.942059525  | 3.550192221 | 1.133709908 | NA          | NA |
| ASV_16s_8011 | 0.299039045 | 0.220005291  | 3.550673365 | 0.979801568 | 0.995147817 | NA |
| ASV_16s_8012 | 0.504340153 | 1.418751341  | 3.549454316 | 1.261725919 | NA          | NA |
| ASV_16s_8013 | 0.624774005 | 0.795397038  | 3.550579997 | 1.798443146 | NA          | NA |

|              |             |              |             |             |             |    |
|--------------|-------------|--------------|-------------|-------------|-------------|----|
| ASV_16s_8014 | 0.468332726 | -0.068252561 | 3.549891932 | 1.839732668 | NA          | NA |
| ASV_16s_8015 | 0.479329665 | -0.158323457 | 3.549405867 | 1.082175494 | NA          | NA |
| ASV_16s_8016 | 0.377153766 | 0.295585917  | 3.550990634 | 0.914416903 | NA          | NA |
| ASV_16s_8017 | 0.385113285 | -0.256755858 | 3.549697314 | 1.18303012  | NA          | NA |
| ASV_16s_8018 | 0.617662493 | 0.599517912  | 3.548664183 | 1.828684314 | NA          | NA |
| ASV_16s_8019 | 0.592601169 | 0.277545951  | 3.550703712 | 2.723901336 | NA          | NA |
| ASV_16s_8020 | 0.354411355 | 0.342436982  | 3.549873664 | 1.698519121 | NA          | NA |
| ASV_16s_8021 | 0.480225166 | 0.360410304  | 3.550805594 | 1.423164677 | NA          | NA |
| ASV_16s_8022 | 0.599030429 | 0.315939201  | 3.550707243 | 1.496446712 | 0.982432419 | NA |
| ASV_16s_8023 | 0.56818758  | 0.857572815  | 3.550653098 | 1.254213899 | 0.989624601 | NA |
| ASV_16s_8024 | 0.437422425 | -0.093954382 | 3.549738946 | 1.839412237 | NA          | NA |
| ASV_16s_8025 | 0.434728327 | -0.199271731 | 3.549687086 | 1.88521289  | NA          | NA |
| ASV_16s_8026 | 0.463264507 | -0.233881658 | 3.549625303 | 1.942596846 | 0.962949008 | NA |
| ASV_16s_8027 | 0.428668285 | -0.214368455 | 3.549693599 | 1.871194631 | NA          | NA |
| ASV_16s_8028 | 0.460520637 | -0.316017197 | 3.549614195 | 1.885787503 | NA          | NA |
| ASV_16s_8029 | 0.45111327  | -0.427781882 | 3.549633809 | 1.709573612 | 0.974156203 | NA |
| ASV_16s_8030 | 0.153133637 | -0.555210816 | 3.551034698 | 0.600311115 | NA          | NA |
| ASV_16s_8031 | 0.576834333 | -0.683457559 | 3.549508577 | 1.036119334 | 0.994224649 | NA |
| ASV_16s_8032 | 0.440353857 | -0.682386927 | 3.549747339 | 0.949175343 | NA          | NA |
| ASV_16s_8033 | 0.136669141 | -0.169771567 | 3.550701022 | 0.622413428 | NA          | NA |
| ASV_16s_8035 | 0.457832271 | 0.071857505  | 3.549354538 | 1.960150769 | 0.962012938 | NA |
| ASV_16s_8036 | 0.571608631 | -0.793687112 | 3.548965613 | 1.342869844 | 0.987257211 | NA |
| ASV_16s_8037 | 0.539940616 | -0.793130606 | 3.548872711 | 1.519595863 | 0.981623487 | NA |
| ASV_16s_8038 | 0.447811122 | -0.326957858 | 3.548878738 | 1.374396263 | NA          | NA |
| ASV_16s_8039 | 0.462920895 | 0.753329422  | 3.548753516 | 1.930080168 | NA          | NA |
| ASV_16s_8040 | 0.476730608 | 0.15102761   | 3.548798703 | 2.216562673 | NA          | NA |
| ASV_16s_8041 | 0.514645847 | 0.023362253  | 3.535951756 | 2.286896836 | 0.942271876 | NA |
| ASV_16s_8042 | 0.535555413 | -0.79156071  | 3.549048493 | 1.729199669 | 0.973299706 | NA |
| ASV_16s_8043 | 0.677552589 | -0.181496596 | 3.548250954 | 1.875254427 | NA          | NA |
| ASV_16s_8044 | 0.531177108 | -0.872614801 | 3.549224221 | 1.722629252 | 0.97358823  | NA |
| ASV_16s_8045 | 0.521643094 | -0.344870898 | 3.549069162 | 1.829012908 | NA          | NA |
| ASV_16s_8046 | 0.498920405 | -0.270772863 | 3.549358981 | 2.364350353 | NA          | NA |
| ASV_16s_8047 | 0.586554449 | 0.893993245  | 3.549037498 | 1.747662156 | 0.97247934  | NA |
| ASV_16s_8048 | 0.528017765 | -0.690646082 | 3.54970312  | 1.769480767 | 0.971491521 | NA |
| ASV_16s_8049 | 0.464117498 | -0.938756569 | 3.549428465 | 1.553174433 | NA          | NA |
| ASV_16s_8050 | 0.518836539 | -0.101135818 | 3.550003697 | 1.517631656 | NA          | NA |
| ASV_16s_8051 | 0.552899157 | 0.262730933  | 3.549139581 | 1.726618056 | 0.973413286 | NA |
| ASV_16s_8052 | 0.601030683 | 0.068758264  | 3.549375997 | 2.20535354  | 0.947605687 | NA |
| ASV_16s_8053 | 0.483818055 | -0.081370186 | 3.549980436 | 1.643451212 | 0.976924048 | NA |
| ASV_16s_8054 | 0.564650889 | -0.051206565 | 3.550617885 | 1.536494177 | 0.98101927  | NA |
| ASV_16s_8055 | 0.591661809 | 0.343677023  | 3.550605151 | 1.163375979 | 0.991745856 | NA |
| ASV_16s_8056 | 0.403117698 | -0.078702908 | 3.550588784 | 1.533980507 | NA          | NA |
| ASV_16s_8057 | 0.624734774 | -0.961113729 | 3.548890466 | 1.476396242 | 0.983115588 | NA |
| ASV_16s_8058 | 0.423665316 | -0.079203461 | 3.550643541 | 1.316038247 | NA          | NA |
| ASV_16s_8059 | 0.298946819 | 0.220005193  | 3.550673395 | 0.979636086 | 0.995150379 | NA |
| ASV_16s_8060 | 0.656774202 | 0.072623593  | 3.548257835 | 1.807509719 | NA          | NA |
| ASV_16s_8061 | 0.442813828 | 2.053495986  | 3.549890001 | 0.584324877 | NA          | NA |
| ASV_16s_8062 | 0.362490056 | 1.363507723  | 3.550765764 | 0.785299346 | NA          | NA |
| ASV_16s_8063 | 0.347843324 | -0.072839172 | 3.550271061 | 1.315839717 | NA          | NA |
| ASV_16s_8064 | 0.733989108 | 0.400255955  | 3.550055675 | 1.492394242 | NA          | NA |
| ASV_16s_8065 | 0.421045336 | 1.20058129   | 3.550366653 | 0.871500532 | NA          | NA |
| ASV_16s_8066 | 0.421045336 | 1.20058129   | 3.550366653 | 0.871500532 | NA          | NA |
| ASV_16s_8067 | 0.658052603 | 1.585996705  | 3.548905234 | 1.533544253 | NA          | NA |
| ASV_16s_8068 | 0.659650407 | 1.470762027  | 3.548995236 | 1.485759232 | NA          | NA |
| ASV_16s_8069 | 0.519726069 | 0.183107673  | 3.549438891 | 1.799377679 | NA          | NA |
| ASV_16s_8070 | 0.574654055 | 0.363422194  | 3.550030282 | 1.09289945  | 0.993187588 | NA |
| ASV_16s_8071 | 0.506768595 | 0.315939353  | 3.550729048 | 1.411479861 | 0.98521705  | NA |
| ASV_16s_8072 | 0.615328696 | 1.006267237  | 3.550428707 | 1.721510496 | 0.973637178 | NA |
| ASV_16s_8073 | 0.661106696 | 1.18619734   | 3.549896434 | 1.12791873  | 0.992492989 | NA |
| ASV_16s_8074 | 0.585781451 | 0.693741729  | 3.550679033 | 1.419632294 | 0.984962344 | NA |
| ASV_16s_8075 | 0.651393097 | 0.693790782  | 3.550666284 | 1.473606148 | 0.983209371 | NA |
| ASV_16s_8076 | 0.592132082 | 0.693751037  | 3.550677678 | 1.425103242 | 0.984789939 | NA |
| ASV_16s_8077 | 0.437744423 | -0.214912445 | 3.549675992 | 1.891301236 | NA          | NA |
| ASV_16s_8078 | 0.432950455 | -0.231121257 | 3.549680342 | 1.877892357 | NA          | NA |
| ASV_16s_8079 | 0.434486856 | -0.252317233 | 3.549672389 | 1.874302641 | 0.966468559 | NA |
| ASV_16s_8080 | 0.444546846 | -0.265902525 | 3.549651254 | 1.88974992  | 0.965689522 | NA |
| ASV_16s_8081 | 0.451206448 | -0.283590122 | 3.549635695 | 1.893085788 | 0.965519979 | NA |

|              |             |              |             |             |             |    |
|--------------|-------------|--------------|-------------|-------------|-------------|----|
| ASV_16s_8082 | 0.466178121 | -0.305971397 | 3.549606162 | 1.906698255 | 0.964823318 | NA |
| ASV_16s_8083 | 0.453887121 | -0.325844615 | 3.549624509 | 1.86209757  | 0.967077035 | NA |
| ASV_16s_8084 | 0.461947171 | -0.401395401 | 3.549610994 | 1.776699768 | 0.971160313 | NA |
| ASV_16s_8085 | 0.151675221 | -0.552222764 | 3.551044312 | 0.597094941 | NA          | NA |
| ASV_16s_8086 | 0.08156097  | -0.169247099 | 3.550832006 | 0.404339037 | NA          | NA |
| ASV_16s_8087 | 0.142733338 | 0.22008588   | 3.550779271 | 0.615505183 | NA          | NA |
| ASV_16s_8088 | 0.425950107 | -0.305343668 | 3.549754133 | 1.7160238   | NA          | NA |
| ASV_16s_8089 | 0.460259054 | -0.079709656 | 3.549543538 | 1.859867035 | 0.967187564 | NA |
| ASV_16s_8090 | 0.472487078 | 0.046496028  | 3.549518335 | 1.943548367 | 0.962898597 | NA |
| ASV_16s_8091 | 0.444585726 | 0.153067904  | 3.549374871 | 1.935067899 | 0.963346558 | NA |
| ASV_16s_8092 | 0.491082578 | 0.018036337  | 3.549280306 | 1.578538061 | 0.979465457 | NA |
| ASV_16s_8093 | 0.474611259 | 0.317619942  | 3.5491333   | 1.800450299 | 0.970055277 | NA |
| ASV_16s_8094 | 0.431322984 | -0.174964514 | 3.54910038  | 1.522070094 | NA          | NA |
| ASV_16s_8095 | 0.483350051 | 0.538694255  | 3.549168797 | 1.811646772 | 0.969526168 | NA |
| ASV_16s_8096 | 0.43437453  | -0.339036643 | 3.548966174 | 1.277562475 | NA          | NA |
| ASV_16s_8097 | 0.469686954 | 0.240966672  | 3.548820855 | 2.215224767 | NA          | NA |
| ASV_16s_8098 | 0.463476541 | 0.577130582  | 3.548660809 | 1.795454515 | NA          | NA |
| ASV_16s_8099 | 0.462673995 | -0.328656584 | 3.548659483 | 1.803439348 | NA          | NA |
| ASV_16s_8100 | 0.541205761 | -0.812785763 | 3.549254112 | 1.174491942 | 0.991502404 | NA |
| ASV_16s_8101 | 0.443375144 | 0.502064864  | 3.548451323 | 1.073930048 | NA          | NA |
| ASV_16s_8102 | 0.543088719 | -0.792301201 | 3.548918493 | 1.687098045 | NA          | NA |
| ASV_16s_8103 | 0.555907447 | 0.593823149  | 3.548011975 | 2.033727835 | 0.957950024 | NA |
| ASV_16s_8104 | 0.563664    | -0.791831871 | 3.54897722  | 1.77597645  | 0.971193597 | NA |
| ASV_16s_8105 | 0.42885261  | 1.367736893  | 3.548437745 | 1.36564799  | 0.986600276 | NA |
| ASV_16s_8106 | 0.559174242 | -0.90948361  | 3.548758308 | 1.448864607 | 0.984027358 | NA |
| ASV_16s_8107 | 0.528437654 | -1.126195688 | 3.54968386  | 0.914790888 | NA          | NA |
| ASV_16s_8108 | 0.555899192 | 2.765087831  | 3.547892248 | 0.287542738 | NA          | NA |
| ASV_16s_8109 | 0.462194503 | 0.911313449  | 3.549619272 | 1.329909149 | NA          | NA |
| ASV_16s_8110 | 0.547971767 | -0.644814218 | 3.548093635 | 1.355880611 | 0.98688444  | NA |
| ASV_16s_8111 | 0.51256144  | 0.219646706  | 3.548771108 | 2.083825327 | 0.955055371 | NA |
| ASV_16s_8112 | 0.493892964 | -0.281040271 | 3.550763896 | 1.063508757 | NA          | NA |
| ASV_16s_8113 | 0.454914226 | -0.559579625 | 3.549594688 | 1.673696348 | 0.975680512 | NA |
| ASV_16s_8114 | 0.674514402 | 0.866192784  | 3.549731008 | 1.778612503 | NA          | NA |
| ASV_16s_8115 | 0.468415053 | 2.125225497  | 3.549580001 | 0.554585571 | NA          | NA |
| ASV_16s_8116 | 0.460395314 | 0.403368393  | 3.550267851 | 0.946763827 | NA          | NA |
| ASV_16s_8117 | 0.807527303 | 0.40357178   | 3.549686847 | 1.127818989 | NA          | NA |
| ASV_16s_8118 | 0.695482195 | -1.996826644 | 3.547837844 | 0.561387712 | NA          | NA |
| ASV_16s_8119 | 0.274861781 | -0.547754396 | 3.549891793 | 0.705024687 | NA          | NA |
| ASV_16s_8120 | 0.217893088 | 1.259791537  | 3.55071501  | 0.608699453 | NA          | NA |
| ASV_16s_8121 | 0.31240033  | 0.220002185  | 3.550669222 | 1.001917217 | NA          | NA |
| ASV_16s_8122 | 0.572954196 | 0.693349653  | 3.551661886 | 0.647114401 | 0.998709912 | NA |
| ASV_16s_8123 | 0.498753019 | 0.973329035  | 3.548845002 | 1.521233344 | 0.981565445 | NA |
| ASV_16s_8124 | 0.56348994  | 0.686417955  | 3.548388318 | 1.332166816 | NA          | NA |
| ASV_16s_8125 | 0.427470307 | -0.059022994 | 3.550308338 | 1.262406334 | NA          | NA |
| ASV_16s_8126 | 0.611176603 | 2.210448526  | 3.548547701 | 1.038869577 | NA          | NA |
| ASV_16s_8127 | 0.318071991 | -0.563707889 | 3.550210468 | 1.227842892 | 0.990271628 | NA |
| ASV_16s_8128 | 0.463620577 | -0.05915777  | 3.549922063 | 1.483607412 | NA          | NA |
| ASV_16s_8129 | 0.135846644 | -0.429205952 | 3.55139876  | 0.548684831 | NA          | NA |
| ASV_16s_8130 | 0.614187783 | 0.17805004   | 3.550589062 | 1.648202115 | 0.97673122  | NA |
| ASV_16s_8131 | 0.521906228 | 1.057319921  | 3.550211882 | 1.553388057 | 0.980403598 | NA |
| ASV_16s_8132 | 0.844367217 | 0.528431172  | 3.55066913  | 2.852457119 | 0.898307379 | NA |
| ASV_16s_8133 | 0.696234161 | 0.893301806  | 3.549661881 | 1.7143596   | 0.973948817 | NA |
| ASV_16s_8134 | 0.55226908  | 0.343433654  | 3.549675823 | 2.01509842  | NA          | NA |
| ASV_16s_8135 | 0.590385013 | 0.315939257  | 3.550708999 | 1.489039704 | 0.98268668  | NA |
| ASV_16s_8136 | 0.659833012 | 1.184865413  | 3.54996474  | 1.137728254 | 0.992290741 | NA |
| ASV_16s_8137 | 0.675385327 | 1.180923933  | 3.550039967 | 1.160953829 | 0.991798316 | NA |
| ASV_16s_8138 | 0.651005114 | 0.735041208  | 3.550741106 | 1.51406574  | NA          | NA |
| ASV_16s_8139 | 0.616452268 | 0.693768562  | 3.550672735 | 1.445588562 | 0.984133833 | NA |
| ASV_16s_8140 | 0.602755927 | 0.693757192  | 3.550675469 | 1.434157603 | 0.984502003 | NA |
| ASV_16s_8141 | 0.431334532 | -0.156203267 | 3.549712761 | 1.867957057 | NA          | NA |
| ASV_16s_8142 | 0.432370208 | -0.183978014 | 3.549697737 | 1.878302941 | NA          | NA |
| ASV_16s_8143 | 0.446593645 | -0.221716406 | 3.549657627 | 1.90965721  | NA          | NA |
| ASV_16s_8144 | 0.45582343  | -0.286510566 | 3.549627071 | 1.900762995 | 0.965128025 | NA |
| ASV_16s_8145 | 0.451952783 | -0.420149425 | 3.549631028 | 1.724964973 | 0.973485868 | NA |
| ASV_16s_8146 | 0.150216806 | -0.549206371 | 3.551054075 | 0.593857267 | NA          | NA |
| ASV_16s_8147 | 0.130686969 | -0.081431756 | 3.550706789 | 0.747563671 | 0.997942994 | NA |
| ASV_16s_8149 | 0.443438273 | -0.65328037  | 3.549532685 | 1.608299318 | 0.978321813 | NA |



|              |             |              |             |             |             |    |
|--------------|-------------|--------------|-------------|-------------|-------------|----|
| ASV_16s_8150 | 0.217324891 | 0.585501893  | 3.550720308 | 1.011224437 | 0.994645433 | NA |
| ASV_16s_8151 | 0.471302005 | 0.068652606  | 3.549196588 | 2.010897957 | 0.959234728 | NA |
| ASV_16s_8152 | 0.478510344 | 0.330750412  | 3.549110877 | 2.22106274  | NA          | NA |
| ASV_16s_8153 | 0.430140405 | 0.68040628   | 3.549366306 | 1.88758119  | NA          | NA |
| ASV_16s_8154 | 0.526275248 | -0.792618211 | 3.548902846 | 1.546774202 | 0.980646016 | NA |
| ASV_16s_8155 | 0.456154604 | 1.004556164  | 3.54884873  | 1.774370669 | 0.97126741  | NA |
| ASV_16s_8156 | 0.569382304 | -0.792940301 | 3.548800681 | 1.674226696 | 0.975658368 | NA |
| ASV_16s_8157 | 0.571835556 | -0.791838678 | 3.548989618 | 1.798618212 | 0.970141357 | NA |
| ASV_16s_8158 | 0.457072772 | 0.205246134  | 3.549270692 | 1.815102199 | NA          | NA |
| ASV_16s_8159 | 0.55460331  | -0.780255274 | 3.549290179 | 1.814088623 | 0.969410079 | NA |
| ASV_16s_8160 | 0.545538575 | 0.249106545  | 3.549372106 | 2.129775984 | 0.952309503 | NA |
| ASV_16s_8161 | 0.551316126 | 0.182783408  | 3.549340593 | 1.914511173 | NA          | NA |
| ASV_16s_8162 | 0.51561977  | -0.68471369  | 3.549728516 | 1.751317317 | 0.972315241 | NA |
| ASV_16s_8163 | 0.610420943 | 2.040096631  | 3.549294724 | 0.613327348 | 0.99891672  | NA |
| ASV_16s_8164 | 0.477971252 | -0.10831038  | 3.550578372 | 1.307186634 | NA          | NA |
| ASV_16s_8165 | 0.560610446 | 0.940674448  | 3.549832834 | 1.444201037 | 0.9841788   | NA |
| ASV_16s_8166 | 0.550239677 | 2.202716246  | 3.503705534 | 0.609593266 | 0.998938107 | NA |
| ASV_16s_8167 | 0.651696474 | 1.435875762  | 3.549116324 | 1.449237875 | 0.984015199 | NA |
| ASV_16s_8168 | 0.455968436 | 0.403363827  | 3.550280932 | 0.94364507  | NA          | NA |
| ASV_16s_8169 | 0.44395328  | 0.388169856  | 3.551371057 | 0.551255854 | NA          | NA |
| ASV_16s_8170 | 0.389843045 | -0.29331877  | 3.549484563 | 1.179109575 | NA          | NA |
| ASV_16s_8171 | 0.151569149 | 0.370805637  | 3.551435401 | 0.514882416 | NA          | NA |
| ASV_16s_8172 | 0.151569149 | 0.370805637  | 3.551435401 | 0.514882416 | NA          | NA |
| ASV_16s_8173 | 0.299864723 | 0.22000501   | 3.5506731   | 0.981169706 | 0.995126602 | NA |
| ASV_16s_8174 | 0.546879257 | 0.665446166  | 3.549564077 | 1.904465243 | NA          | NA |
| ASV_16s_8175 | 0.447308673 | -0.068964229 | 3.549743321 | 1.930506688 | NA          | NA |
| ASV_16s_8176 | 0.450281783 | -0.068784781 | 3.549780052 | 1.898060091 | NA          | NA |
| ASV_16s_8177 | 0.354268573 | 0.848019682  | 3.55043435  | 1.365413457 | NA          | NA |
| ASV_16s_8178 | 0.469941648 | -0.068735426 | 3.549771136 | 1.922331672 | 0.964013686 | NA |
| ASV_16s_8179 | 0.368253312 | 0.69376292   | 3.550099423 | 1.172001729 | NA          | NA |
| ASV_16s_8180 | 0.569898538 | 0.365770144  | 3.550796159 | 0.792741561 | 0.997517324 | NA |
| ASV_16s_8181 | 0.461112481 | 0.107120093  | 3.550765477 | 1.419578739 | NA          | NA |
| ASV_16s_8182 | 0.786660848 | -0.145556031 | 3.548286812 | 2.036617298 | NA          | NA |
| ASV_16s_8183 | 0.770361112 | 0.069069113  | 3.550616639 | 2.433656241 | 0.932009417 | NA |
| ASV_16s_8184 | 0.541544216 | 0.328437893  | 3.550770484 | 1.028171712 | 0.994361196 | NA |
| ASV_16s_8185 | 0.573450535 | 0.885771753  | 3.550140974 | 1.150700163 | 0.992018075 | NA |
| ASV_16s_8186 | 0.763662561 | -0.005540624 | 3.550080905 | 2.657035128 | 0.914815506 | NA |
| ASV_16s_8187 | 0.638504794 | 0.343758012  | 3.549661075 | 2.169480594 | 0.949867313 | NA |
| ASV_16s_8188 | 0.588006288 | 0.353716139  | 3.550000724 | 1.872675937 | 0.966550017 | NA |
| ASV_16s_8189 | 0.581462333 | 0.344267428  | 3.549822705 | 1.925505517 | NA          | NA |
| ASV_16s_8190 | 0.637681493 | 0.792798187  | 3.548721845 | 1.601702397 | 0.978578454 | NA |
| ASV_16s_8191 | 0.553710888 | 0.418793668  | 3.550669555 | 1.870271644 | 0.96667021  | NA |
| ASV_16s_8192 | 0.629182303 | 0.700302387  | 3.55074217  | 1.9684866   | NA          | NA |
| ASV_16s_8193 | 0.535661219 | 0.315939233  | 3.550721414 | 1.43963079  | 0.984326371 | NA |
| ASV_16s_8194 | 0.512108759 | 0.315939229  | 3.550727573 | 1.416783526 | 0.985051646 | NA |
| ASV_16s_8195 | 0.503806599 | 0.315939385  | 3.550729882 | 1.408481658 | 0.985310062 | NA |
| ASV_16s_8196 | 0.584926546 | 0.985251235  | 3.550568701 | 1.230355733 | 0.990211086 | NA |
| ASV_16s_8197 | 0.679730476 | 1.72590638   | 3.549372161 | 0.816325085 | NA          | NA |
| ASV_16s_8198 | 0.423957415 | -0.149111801 | 3.549731408 | 1.8482851   | NA          | NA |
| ASV_16s_8199 | 0.42751383  | -0.166175098 | 3.549715414 | 1.863030227 | NA          | NA |
| ASV_16s_8200 | 0.434583618 | -0.205747666 | 3.549685075 | 1.884808337 | 0.965939821 | NA |
| ASV_16s_8201 | 0.4452953   | -0.273017181 | 3.549648656 | 1.887197227 | 0.965818947 | NA |
| ASV_16s_8202 | 0.445039343 | -0.299998626 | 3.549643593 | 1.867407693 | 0.966813067 | NA |
| ASV_16s_8203 | 0.440760484 | -0.297328522 | 3.549651842 | 1.860372827 | 0.967162519 | NA |
| ASV_16s_8204 | 0.439044801 | -0.303190044 | 3.549654051 | 1.85182788  | 0.9675842   | NA |
| ASV_16s_8205 | 0.428393259 | -0.310711391 | 3.549673217 | 1.821989465 | NA          | NA |
| ASV_16s_8206 | 0.424134241 | -0.367793805 | 3.549678823 | 1.748942194 | 0.972421936 | NA |
| ASV_16s_8207 | 0.488081902 | -0.405236097 | 3.549568972 | 1.820164768 | 0.969120127 | NA |
| ASV_16s_8208 | 0.14875839  | -0.546163425 | 3.551063985 | 0.590598442 | NA          | NA |
| ASV_16s_8209 | 0.14875839  | -0.546163425 | 3.551063985 | 0.590598442 | NA          | NA |
| ASV_16s_8210 | 0.416703215 | -0.682136297 | 3.549804513 | 0.931388623 | NA          | NA |
| ASV_16s_8211 | 0.416703215 | -0.682136297 | 3.549804513 | 0.931388623 | NA          | NA |
| ASV_16s_8212 | 0.416703215 | -0.682136297 | 3.549804513 | 0.931388623 | NA          | NA |
| ASV_16s_8213 | 0.430698729 | 0.198059583  | 3.548949649 | 2.104811083 | NA          | NA |
| ASV_16s_8214 | 0.432029676 | 0.692617663  | 3.548730295 | 1.802105212 | 0.969977402 | NA |
| ASV_16s_8215 | 0.482840698 | -0.515262867 | 3.548122858 | 1.399384438 | 0.985590111 | NA |
| ASV_16s_8216 | 0.465574329 | -1.295764775 | 3.54936809  | 1.18620125  | 0.991241148 | NA |

|              |             |              |             |             |             |    |
|--------------|-------------|--------------|-------------|-------------|-------------|----|
| ASV_16s_8217 | 0.477153749 | 0.465416995  | 3.548938865 | 1.639563258 | 0.977081156 | NA |
| ASV_16s_8218 | 0.531821871 | -0.791847129 | 3.548993771 | 1.695639984 | 0.97475455  | NA |
| ASV_16s_8219 | 0.539873511 | -0.615115611 | 3.548987148 | 1.72904341  | 0.973306588 | NA |
| ASV_16s_8220 | 0.567486654 | 1.109569191  | 3.547497832 | 1.034911231 | NA          | NA |
| ASV_16s_8221 | 0.505810999 | -0.475904539 | 3.549391544 | 1.713242517 | NA          | NA |
| ASV_16s_8222 | 0.395397845 | 0.733094519  | 3.551332278 | 1.108490249 | NA          | NA |
| ASV_16s_8223 | 0.547270848 | -0.773788842 | 3.549340955 | 1.805525024 | NA          | NA |
| ASV_16s_8224 | 0.52794273  | -0.763667129 | 3.549423406 | 1.777315861 | 0.971131946 | NA |
| ASV_16s_8225 | 0.565991032 | -1.608347206 | 3.548491297 | 1.036611515 | NA          | NA |
| ASV_16s_8226 | 0.511761291 | -1.11477551  | 2.941962881 | 0.886501956 | 0.996457734 | NA |
| ASV_16s_8227 | 0.445874499 | 0.339530731  | 3.551131023 | 0.850240452 | NA          | NA |
| ASV_16s_8228 | 0.528659488 | 0.144599388  | 3.549522635 | 2.041823349 | 0.957489284 | NA |
| ASV_16s_8229 | 0.519408874 | 0.283511074  | 3.549629772 | 1.72889075  | 0.973313312 | NA |
| ASV_16s_8230 | 0.60105651  | 0.76484955   | 3.548789482 | 1.627846725 | 0.977550831 | NA |
| ASV_16s_8231 | 0.489139193 | -0.690951091 | 3.549501365 | 1.423326412 | 0.984846062 | NA |
| ASV_16s_8232 | 0.517321067 | -0.737867803 | 3.549601485 | 1.564928401 | 0.979976334 | NA |
| ASV_16s_8233 | 0.461210333 | -0.116127493 | 3.550519298 | 1.566283187 | 0.979925818 | NA |
| ASV_16s_8234 | 0.560891265 | 0.063898819  | 3.550446059 | 1.566214231 | 0.979928391 | NA |
| ASV_16s_8235 | 0.459998308 | -0.254603707 | 3.548872286 | 1.787388075 | NA          | NA |
| ASV_16s_8236 | 0.488261118 | -0.073471205 | 3.550395485 | 1.220429585 | NA          | NA |
| ASV_16s_8237 | 0.555584854 | -0.219956876 | 3.55053339  | 1.583833543 | 0.979264626 | NA |
| ASV_16s_8238 | 0.622965957 | -0.586657086 | 3.548865892 | 2.060551333 | 0.956413034 | NA |
| ASV_16s_8239 | 0.529393551 | 0.002493013  | 3.550645136 | 1.485765075 | 0.982798384 | NA |
| ASV_16s_8240 | 0.644054579 | 1.339787973  | 3.549693935 | 1.029532299 | 0.994337968 | NA |
| ASV_16s_8241 | 0.455162658 | -0.774869544 | 3.549182179 | 1.259437532 | NA          | NA |
| ASV_16s_8242 | 0.358827489 | 0.686735645  | 3.550632629 | 0.830187587 | NA          | NA |
| ASV_16s_8243 | 0.499685679 | 0.97469423   | 3.550576677 | 0.829021971 | NA          | NA |
| ASV_16s_8244 | 0.527650129 | -1.771276475 | 3.548515074 | 0.522583642 | NA          | NA |
| ASV_16s_8245 | 0.711428185 | 0.41920047   | 3.549623257 | 1.017484372 | NA          | NA |
| ASV_16s_8246 | 0.324993259 | -0.107049016 | 3.549675512 | 1.523504403 | NA          | NA |
| ASV_16s_8247 | 0.150097604 | 0.370100041  | 3.551444233 | 0.511736973 | NA          | NA |
| ASV_16s_8248 | 0.150097604 | 0.370100041  | 3.551444233 | 0.511736973 | NA          | NA |
| ASV_16s_8249 | 0.258400876 | 0.177173281  | 3.549877663 | 1.564217197 | NA          | NA |
| ASV_16s_8250 | 0.29381174  | 0.220006536  | 3.550675092 | 0.970837445 | 0.995285351 | NA |
| ASV_16s_8251 | 0.318931709 | 0.495144622  | 3.550647843 | 1.582226143 | NA          | NA |
| ASV_16s_8252 | 0.567654603 | 2.230657788  | 3.549149168 | 0.936756286 | NA          | NA |
| ASV_16s_8253 | 0.419984404 | -0.069724696 | 3.550335968 | 1.684187213 | NA          | NA |
| ASV_16s_8254 | 0.673045178 | -1.203962495 | 3.548470095 | 1.55681129  | NA          | NA |
| ASV_16s_8255 | 0.415317618 | -0.916785344 | 3.549496679 | 1.348192068 | 0.987105517 | NA |
| ASV_16s_8256 | 0.346325151 | 1.085298366  | 3.549542306 | 1.186476642 | NA          | NA |
| ASV_16s_8257 | 0.431876844 | -0.06929538  | 3.549787925 | 1.926906605 | NA          | NA |
| ASV_16s_8258 | 0.495550514 | -0.583824716 | 3.549908408 | 1.124465369 | NA          | NA |
| ASV_16s_8259 | 0.443516024 | -0.069215856 | 3.54972787  | 1.959787097 | 0.962032461 | NA |
| ASV_16s_8260 | 0.457269419 | -0.069097157 | 3.54971908  | 1.964626783 | 0.961772199 | NA |
| ASV_16s_8261 | 0.288476082 | 0.716057218  | 3.551018685 | 1.111617235 | NA          | NA |
| ASV_16s_8262 | 0.534845947 | 1.203958542  | 3.549740903 | 0.958709597 | NA          | NA |
| ASV_16s_8263 | 0.538671576 | 1.174508577  | 3.549934376 | 1.643557173 | 0.976919757 | NA |
| ASV_16s_8264 | 0.646211696 | 0.287087695  | 3.548652243 | 1.858024305 | 0.967278719 | NA |
| ASV_16s_8265 | 0.544944336 | 0.342525976  | 3.549602772 | 2.130791824 | 0.952247822 | NA |
| ASV_16s_8266 | 0.589117768 | 0.351148896  | 3.54998628  | 1.845152661 | NA          | NA |
| ASV_16s_8267 | 0.609145111 | 0.522030272  | 3.550369809 | 1.540776651 | 0.980864302 | NA |
| ASV_16s_8268 | 0.49770596  | 0.315939399  | 3.550731629 | 1.402281418 | 0.985501284 | NA |
| ASV_16s_8269 | 0.494968395 | 0.3159394    | 3.550732426 | 1.399479096 | 0.985587214 | NA |
| ASV_16s_8270 | 0.547824946 | 0.315939262  | 3.550718445 | 1.450994385 | 0.983957908 | NA |
| ASV_16s_8271 | 0.748519898 | 1.186920229  | 3.549725551 | 1.158928976 | 0.99184201  | NA |
| ASV_16s_8272 | 0.421476939 | -0.249655399 | 3.549698439 | 1.846085189 | 0.96786588  | NA |
| ASV_16s_8273 | 0.449226709 | -0.275613536 | 3.549641023 | 1.894010108 | 0.965472919 | NA |
| ASV_16s_8274 | 0.434131602 | -0.279179953 | 3.549667868 | 1.858988357 | 0.967231048 | NA |
| ASV_16s_8275 | 0.477535233 | -0.305984049 | 3.549587927 | 1.929699489 | 0.963628582 | NA |
| ASV_16s_8276 | 0.147299975 | -0.543092378 | 3.551074048 | 0.587316719 | NA          | NA |
| ASV_16s_8277 | 0.419454689 | -0.682164312 | 3.549797556 | 0.933497502 | NA          | NA |
| ASV_16s_8278 | 0.41261789  | -0.682089404 | 3.549815055 | 0.928210727 | NA          | NA |
| ASV_16s_8279 | 0.116608378 | -0.169638081 | 3.550734441 | 0.551071553 | NA          | NA |
| ASV_16s_8280 | 0.267083923 | 0.220014172  | 3.550684959 | 0.922604397 | NA          | NA |
| ASV_16s_8282 | 0.450486072 | -0.249764306 | 3.549588911 | 1.524606943 | 0.98144552  | NA |
| ASV_16s_8283 | 0.430472276 | -0.018861927 | 3.549622419 | 1.851033247 | 0.967623259 | NA |
| ASV_16s_8284 | 0.03751493  | 0.633443729  | 3.551962276 | 0.14007731  | 0.999992597 | NA |

|              |             |              |             |             |             |    |
|--------------|-------------|--------------|-------------|-------------|-------------|----|
| ASV_16s_8285 | 0.425642197 | 0.05723161   | 3.549452953 | 1.844071203 | 0.96796434  | NA |
| ASV_16s_8286 | 0.423632177 | 0.225653763  | 3.549339673 | 1.7018758   | 0.974487766 | NA |
| ASV_16s_8287 | 0.421618518 | -0.33901659  | 3.54902294  | 1.246839608 | NA          | NA |
| ASV_16s_8288 | 0.498918046 | -0.792690863 | 3.549004423 | 1.430157874 | 0.984629599 | NA |
| ASV_16s_8289 | 0.504947496 | -0.595833551 | 3.548994806 | 1.607817803 | 0.978340606 | NA |
| ASV_16s_8290 | 0.459734572 | 0.632293276  | 3.548853706 | 1.981865793 | NA          | NA |
| ASV_16s_8291 | 0.5198445   | -0.792628619 | 3.54892316  | 1.553157546 | 0.980412077 | NA |
| ASV_16s_8292 | 0.556294508 | -0.792903802 | 3.548824135 | 1.630369108 | NA          | NA |
| ASV_16s_8293 | 0.560244055 | -0.792438083 | 3.548877027 | 1.717554367 | 0.973809851 | NA |
| ASV_16s_8294 | 0.527037027 | -0.737863021 | 3.531357372 | 1.930082556 | 0.963608498 | NA |
| ASV_16s_8295 | 0.546993728 | -0.791735591 | 3.549006469 | 1.744148161 | NA          | NA |
| ASV_16s_8296 | 0.503878514 | -0.277046862 | 3.548300887 | 1.890924552 | NA          | NA |
| ASV_16s_8297 | 0.462454368 | 0.191002545  | 3.548917319 | 1.800501269 | NA          | NA |
| ASV_16s_8298 | 0.538227137 | -0.788822417 | 3.549211179 | 1.772829288 | 0.971338161 | NA |
| ASV_16s_8299 | 0.500404055 | 1.595926339  | 3.342697083 | 1.421396357 | 0.984906883 | NA |
| ASV_16s_8300 | 0.481358465 | -0.90712595  | 3.549847679 | 1.053315156 | 0.993922036 | NA |
| ASV_16s_8301 | 0.469178773 | -0.89134173  | 3.549327831 | 1.398341768 | NA          | NA |
| ASV_16s_8302 | 0.854507379 | -0.886440729 | 3.549522331 | 1.36290694  | 0.986680397 | NA |
| ASV_16s_8303 | 0.452263648 | -1.199294342 | 3.549409217 | 0.996914648 | NA          | NA |
| ASV_16s_8304 | 0.484563659 | -0.917121036 | 3.549159437 | 1.450799866 | NA          | NA |
| ASV_16s_8305 | 0.334837227 | -0.022710062 | 3.550387265 | 1.37356994  | NA          | NA |
| ASV_16s_8306 | 0.550485185 | -0.601067189 | 3.549963546 | 1.159008652 | 0.991840293 | NA |
| ASV_16s_8307 | 0.54515466  | 0.679200653  | 3.550712648 | 1.516746072 | 0.981724242 | NA |
| ASV_16s_8308 | 0.461933622 | 1.269002674  | 3.55099728  | 0.485150211 | 0.999499059 | NA |
| ASV_16s_8309 | 0.398406201 | 0.933492116  | 3.548975818 | 1.60138057  | NA          | NA |
| ASV_16s_8310 | 0.403613891 | 1.962107317  | 3.549842149 | 0.54702343  | 0.999255436 | NA |
| ASV_16s_8311 | 0.474792881 | 1.519201677  | 3.549588112 | 1.236291384 | NA          | NA |
| ASV_16s_8312 | 0.583757504 | 0.481051926  | 3.548563562 | 2.13478698  | NA          | NA |
| ASV_16s_8313 | 0.306316291 | -0.580971212 | 3.550409726 | 0.96181653  | NA          | NA |
| ASV_16s_8314 | 0.267762183 | 1.302996883  | 3.550530179 | 0.67983164  | NA          | NA |
| ASV_16s_8315 | 0.199893312 | -0.072229599 | 3.550753873 | 0.886598741 | NA          | NA |
| ASV_16s_8316 | 0.239822982 | -0.547045771 | 3.550066098 | 0.661754252 | NA          | NA |
| ASV_16s_8317 | 0.28970508  | 0.220007619  | 3.55067649  | 0.963703896 | 0.995392986 | NA |
| ASV_16s_8318 | 0.421361635 | 0.418113644  | 3.551046123 | 0.703587803 | NA          | NA |
| ASV_16s_8319 | 0.464824526 | -0.069056963 | 3.549712493 | 1.976064163 | NA          | NA |
| ASV_16s_8320 | 0.529574232 | 0.342797143  | 3.5507284   | 0.984926744 | 0.995068038 | NA |
| ASV_16s_8321 | 0.660624942 | 0.360267368  | 3.548287998 | 1.561844807 | 0.980091032 | NA |
| ASV_16s_8322 | 0.556067136 | 0.919341941  | 3.550473094 | 1.530714415 | 0.981227237 | NA |
| ASV_16s_8323 | 0.569228372 | 0.919343016  | 3.55046992  | 1.544146551 | 0.980741832 | NA |
| ASV_16s_8324 | 0.612513397 | 0.643052048  | 3.550730984 | 2.047515394 | NA          | NA |
| ASV_16s_8325 | 0.506454329 | 0.400828644  | 3.550693096 | 3.101645285 | 0.875442634 | NA |
| ASV_16s_8326 | 0.457573036 | 0.360407047  | 3.550816073 | 1.398568877 | NA          | NA |
| ASV_16s_8327 | 0.527947262 | 0.693699206  | 3.550692896 | 1.366795754 | 0.98656664  | NA |
| ASV_16s_8328 | 0.598828764 | 0.693756865  | 3.550676278 | 1.430816298 | 0.984608638 | NA |
| ASV_16s_8329 | 0.665412847 | 0.693797674  | 3.550663887 | 1.484405986 | 0.982844618 | NA |
| ASV_16s_8330 | 0.962658152 | 1.205674642  | 3.549324569 | 1.148104766 | NA          | NA |
| ASV_16s_8331 | 0.417542155 | -0.121472685 | 3.549761401 | 1.817589896 | NA          | NA |
| ASV_16s_8332 | 0.411775255 | -0.18623524  | 3.549738909 | 1.831658155 | NA          | NA |
| ASV_16s_8333 | 0.420131343 | -0.193634654 | 3.549718304 | 1.851786135 | NA          | NA |
| ASV_16s_8334 | 0.421167018 | -0.221913945 | 3.549706278 | 1.853051831 | NA          | NA |
| ASV_16s_8335 | 0.42747442  | -0.288718009 | 3.549678683 | 1.83767996  | 0.968275672 | NA |
| ASV_16s_8336 | 0.414495198 | -0.294421453 | 3.549703789 | 1.804182869 | NA          | NA |
| ASV_16s_8337 | 0.454332666 | -0.36115604  | 3.54962213  | 1.821101242 | 0.969075301 | NA |
| ASV_16s_8338 | 0.408350034 | -0.335569643 | 3.549711967 | 1.752550963 | NA          | NA |
| ASV_16s_8339 | 0.145841559 | -0.539993554 | 3.551084267 | 0.584008651 | NA          | NA |
| ASV_16s_8340 | 0.408532564 | -0.682040474 | 3.549825806 | 0.925001167 | NA          | NA |
| ASV_16s_8341 | 0.090472634 | -0.169375252 | 3.550800078 | 0.444801218 | NA          | NA |
| ASV_16s_8342 | 0.264439528 | 0.220015004  | 3.550686045 | 0.917567943 | NA          | NA |
| ASV_16s_8343 | 0.181449053 | 0.220053042  | 3.550736093 | 0.729919181 | NA          | NA |
| ASV_16s_8344 | 0.429665577 | -3.37E-06    | 3.549657347 | 1.843177305 | 0.968007986 | NA |
| ASV_16s_8345 | 0.444872974 | -0.190876656 | 3.54957858  | 1.804152123 | 0.969880921 | NA |
| ASV_16s_8346 | 0.4246352   | -0.410650636 | 3.549635439 | 1.577660193 | 0.979498639 | NA |
| ASV_16s_8347 | 0.427709559 | -0.220226284 | 3.549840726 | 1.516437333 | NA          | NA |
| ASV_16s_8348 | 0.534236047 | -0.792843323 | 3.54887958  | 1.55949006  | 0.980178358 | NA |
| ASV_16s_8349 | 0.522259194 | -0.79254689  | 3.548923656 | 1.586437889 | 0.979165434 | NA |
| ASV_16s_8350 | 0.543168708 | -0.791371154 | 3.549075763 | 1.755901611 | 0.97210864  | NA |
| ASV_16s_8351 | 0.540199182 | -0.291408196 | 3.548433323 | 1.60224206  | 0.978557527 | NA |

|              |             |              |             |             |             |    |
|--------------|-------------|--------------|-------------|-------------|-------------|----|
| ASV_16s_8352 | 0.458435392 | -0.188548167 | 3.550033659 | 1.654863078 | NA          | NA |
| ASV_16s_8353 | 0.454670563 | -0.331796002 | 3.548779066 | 1.915937118 | NA          | NA |
| ASV_16s_8354 | 0.591742902 | -0.821701414 | 3.548848517 | 1.450674877 | 0.983968338 | NA |
| ASV_16s_8355 | 0.539396807 | 0.030828537  | 3.549578759 | 1.97668399  | 0.961119565 | NA |
| ASV_16s_8356 | 0.495115809 | 0.355661823  | 3.549724068 | 1.698536569 | 0.974630828 | NA |
| ASV_16s_8357 | 0.441168567 | -0.669347633 | 3.549698393 | 1.502234303 | NA          | NA |
| ASV_16s_8358 | 0.533751394 | 0.546165454  | 3.550714531 | 2.126481632 | 0.952509243 | NA |
| ASV_16s_8359 | 0.452565224 | -0.693559861 | 3.549544776 | 1.53562787  | 0.981050528 | NA |
| ASV_16s_8360 | 0.522342336 | -0.423553973 | 3.549421067 | 2.244067537 | 0.945106621 | NA |
| ASV_16s_8361 | 0.531563612 | -0.310931483 | 3.55047799  | 1.434149735 | 0.984502255 | NA |
| ASV_16s_8362 | 0.454140457 | 1.8728422    | 3.549858266 | 0.62684177  | NA          | NA |
| ASV_16s_8363 | 0.370451394 | -0.583267608 | 3.549882999 | 1.068117574 | NA          | NA |
| ASV_16s_8364 | 0.256624706 | -0.566764787 | 3.550645137 | 0.843218304 | NA          | NA |
| ASV_16s_8365 | 0.199319494 | 0.392981017  | 3.551139061 | 0.604184808 | NA          | NA |
| ASV_16s_8366 | 0.300267911 | -0.111802389 | 3.549982419 | 1.030280544 | NA          | NA |
| ASV_16s_8367 | 0.282465763 | 0.220009584  | 3.550679054 | 0.950891584 | 0.995582306 | NA |
| ASV_16s_8368 | 0.282819218 | 0.220009487  | 3.550678926 | 0.951524131 | 0.995573079 | NA |
| ASV_16s_8369 | 0.295238605 | 0.220006244  | 3.550674617 | 0.973270852 | 0.995248267 | NA |
| ASV_16s_8370 | 0.522850618 | -0.178893358 | 3.549317514 | 1.733000019 | NA          | NA |
| ASV_16s_8371 | 0.426332965 | -0.069421458 | 3.550039934 | 1.817989808 | 0.969224093 | NA |
| ASV_16s_8372 | 0.426177594 | 0.664709126  | 3.549709158 | 1.674454328 | 0.97564886  | NA |
| ASV_16s_8373 | 0.433056711 | -0.069260414 | 3.549767652 | 1.935716132 | 0.963312422 | NA |
| ASV_16s_8374 | 0.483696764 | 1.265402452  | 3.549523467 | 1.551634911 | NA          | NA |
| ASV_16s_8375 | 0.495998501 | -1.171390255 | 3.548457985 | 1.180074686 | NA          | NA |
| ASV_16s_8376 | 0.391531455 | -0.131719359 | 3.549313579 | 1.476482369 | NA          | NA |
| ASV_16s_8377 | 0.378409932 | 0.518748609  | 3.550592048 | 1.441433939 | NA          | NA |
| ASV_16s_8378 | 0.513251299 | 0.328438186  | 3.550782368 | 1.001879901 | 0.994798154 | NA |
| ASV_16s_8379 | 0.564583392 | 0.112682294  | 3.549615743 | 2.18941682  | 0.948616863 | NA |
| ASV_16s_8380 | 0.729499765 | 0.670940234  | 3.549509024 | 2.281876119 | 0.942607969 | NA |
| ASV_16s_8381 | 0.602016294 | 0.273949406  | 3.549584844 | 2.193148644 | 0.948381003 | NA |
| ASV_16s_8382 | 0.502313921 | 0.235494445  | 3.550701253 | 2.466468198 | NA          | NA |
| ASV_16s_8383 | 0.506562959 | 0.359778521  | 3.550442635 | 1.085377022 | 0.993331264 | NA |
| ASV_16s_8384 | 0.574033709 | 0.363384655  | 3.550107993 | 1.102118524 | 0.993008854 | NA |
| ASV_16s_8385 | 0.563141597 | 0.361638197  | 3.550363372 | 1.126746343 | 0.992516934 | NA |
| ASV_16s_8386 | 0.546798996 | 0.315939134  | 3.550718691 | 1.450026609 | 0.983989489 | NA |
| ASV_16s_8387 | 0.493375181 | 0.315939305  | 3.550732895 | 1.397820453 | 0.985637928 | NA |
| ASV_16s_8388 | 0.47318564  | 0.315939426  | 3.550739098 | 1.376595313 | NA          | NA |
| ASV_16s_8389 | 0.450632208 | 0.688424713  | 3.550701924 | 1.261702944 | NA          | NA |
| ASV_16s_8390 | 0.438400395 | -0.208796674 | 3.549676856 | 1.892954934 | NA          | NA |
| ASV_16s_8391 | 0.409271963 | -0.261692565 | 3.549721408 | 1.812542894 | 0.969483594 | NA |
| ASV_16s_8392 | 0.490490538 | -0.319467255 | 3.549566302 | 1.942423628 | 0.962958181 | NA |
| ASV_16s_8393 | 0.431119034 | -0.298165693 | 3.549669893 | 1.838542961 | 0.968233733 | NA |
| ASV_16s_8394 | 0.408304736 | -0.320203036 | 3.549713263 | 1.767911433 | NA          | NA |
| ASV_16s_8395 | 0.413138633 | -0.353929531 | 3.549701279 | 1.742407148 | 0.972714289 | NA |
| ASV_16s_8396 | 0.43489725  | -0.404610703 | 3.549660702 | 1.717065648 | 0.973831137 | NA |
| ASV_16s_8397 | 0.413172858 | -0.402423807 | 3.549704605 | 1.675052091 | 0.975623882 | NA |
| ASV_16s_8398 | 0.404447238 | -0.681991454 | 3.549836773 | 0.9217595   | NA          | NA |
| ASV_16s_8399 | 0.114299301 | -0.169619838 | 3.55073904  | 0.542293993 | NA          | NA |
| ASV_16s_8401 | 0.43209751  | 0.121694238  | 3.549486949 | 1.881747093 | 0.966094365 | NA |
| ASV_16s_8402 | 0.414066802 | 0.075829149  | 3.54955648  | 1.820064413 | 0.969124928 | NA |
| ASV_16s_8403 | 0.436943455 | -0.641793435 | 3.549550381 | 1.605071185 | 0.978447621 | NA |
| ASV_16s_8404 | 0.497875316 | 0.154793478  | 3.549047612 | 2.223165144 | 0.946463409 | NA |
| ASV_16s_8405 | 0.512166054 | -0.792984838 | 3.549102425 | 1.31136287  | NA          | NA |
| ASV_16s_8406 | 0.353476775 | -0.266413861 | 3.550093303 | 1.365189081 | NA          | NA |
| ASV_16s_8407 | 0.426701651 | 0.603302944  | 3.549201272 | 1.875688523 | 0.966399074 | NA |
| ASV_16s_8408 | 0.469051216 | -0.006974443 | 3.548788207 | 2.096918771 | NA          | NA |
| ASV_16s_8409 | 0.421099233 | 1.334257595  | 3.549732406 | 1.132392501 | NA          | NA |
| ASV_16s_8410 | 0.547905662 | -0.792179242 | 3.548930916 | 1.711770147 | 0.974061142 | NA |
| ASV_16s_8411 | 0.522433511 | -0.795400207 | 3.5491762   | 1.407856835 | 0.985329401 | NA |
| ASV_16s_8412 | 0.530944338 | -0.791385909 | 3.549082002 | 1.727745603 | NA          | NA |
| ASV_16s_8413 | 0.469567384 | -1.258308237 | 3.549324888 | 0.735941908 | 0.998044077 | NA |
| ASV_16s_8414 | 0.528910649 | -0.791079678 | 3.549156055 | 1.741773423 | 0.972742545 | NA |
| ASV_16s_8415 | 0.510715364 | -0.787808814 | 3.549252659 | 1.721168559 | 0.973652129 | NA |
| ASV_16s_8416 | 0.517486727 | -0.879216095 | 3.549381244 | 1.725367388 | NA          | NA |
| ASV_16s_8417 | 0.52588315  | -0.765444941 | 3.549411424 | 1.772917604 | 0.97133411  | NA |
| ASV_16s_8418 | 0.531633761 | -0.395017578 | 2.745100278 | 3.497618976 | 0.835477614 | NA |
| ASV_16s_8419 | 0.498527249 | -0.729443098 | 3.549594226 | 1.73166795  | 0.973190852 | NA |

|              |             |              |             |             |             |    |
|--------------|-------------|--------------|-------------|-------------|-------------|----|
| ASV_16s_8420 | 0.468535155 | -0.63796764  | 3.550614068 | 0.930791697 | NA          | NA |
| ASV_16s_8421 | 0.487202657 | 0.567523041  | 3.548613691 | 1.94836415  | NA          | NA |
| ASV_16s_8422 | 0.593247036 | 0.788669482  | 3.55046855  | 1.154547792 | NA          | NA |
| ASV_16s_8423 | 0.299174103 | 0.115537871  | 3.550648406 | 0.977378859 | 0.995185239 | NA |
| ASV_16s_8424 | 0.9085237   | 0.271493329  | 3.54956613  | 1.162905377 | NA          | NA |
| ASV_16s_8425 | 0.507679488 | 0.690368401  | 3.550439052 | 0.733878367 | NA          | NA |
| ASV_16s_8426 | 0.470269911 | 1.144936988  | 3.550084541 | 1.046762962 | 0.994038504 | NA |
| ASV_16s_8427 | 0.634162552 | 0.387729078  | 3.551466114 | 0.594060408 | NA          | NA |
| ASV_16s_8428 | 0.145682969 | 0.367941598  | 3.551471619 | 0.502174495 | NA          | NA |
| ASV_16s_8429 | 0.145682969 | 0.367941598  | 3.551471619 | 0.502174495 | NA          | NA |
| ASV_16s_8430 | 0.586995009 | 0.865405218  | 3.549186617 | 1.524974394 | NA          | NA |
| ASV_16s_8431 | 0.377773363 | 1.075670587  | 3.549951592 | 1.338206928 | NA          | NA |
| ASV_16s_8432 | 0.328766543 | 1.762918869  | 3.550105042 | 0.691591514 | 0.998399513 | NA |
| ASV_16s_8433 | 0.424716303 | -0.069417971 | 3.54996685  | 1.842714144 | 0.968030588 | NA |
| ASV_16s_8434 | 0.431144536 | 2.084053793  | 3.54938372  | 0.736682511 | 0.998037736 | NA |
| ASV_16s_8435 | 0.70742581  | -1.994898829 | 3.548165344 | 0.63848915  | NA          | NA |
| ASV_16s_8436 | 0.406259144 | 1.322932906  | 3.550102063 | 1.005370319 | NA          | NA |
| ASV_16s_8437 | 0.427909145 | 0.394020591  | 3.550955227 | 0.801455157 | NA          | NA |
| ASV_16s_8438 | 0.533432218 | -0.174394194 | 3.549276743 | 1.649690957 | NA          | NA |
| ASV_16s_8439 | 0.446948924 | -0.315603656 | 3.549237904 | 2.225403102 | NA          | NA |
| ASV_16s_8440 | 0.575458221 | -0.635569446 | 3.549240431 | 1.780942061 | 0.970964661 | NA |
| ASV_16s_8441 | 0.335232492 | -0.07908697  | 3.550677576 | 1.197272386 | NA          | NA |
| ASV_16s_8442 | 0.523516455 | 0.343352358  | 3.549687343 | 1.983372138 | NA          | NA |
| ASV_16s_8443 | 0.448512183 | 0.360405693  | 3.55082056  | 1.388388827 | NA          | NA |
| ASV_16s_8444 | 0.523034338 | 0.315939326  | 3.550724656 | 1.427435765 | 0.984716074 | NA |
| ASV_16s_8445 | 0.306975269 | 0.734400485  | 3.550925879 | 1.132507055 | NA          | NA |
| ASV_16s_8446 | 0.615427418 | 0.693767281  | 3.550672941 | 1.444679359 | 0.984163307 | NA |
| ASV_16s_8447 | 0.514133134 | 0.693686482  | 3.55069667  | 1.353307756 | 0.986958675 | NA |
| ASV_16s_8448 | 0.410677506 | -0.164098133 | 3.549751673 | 1.823690828 | NA          | NA |
| ASV_16s_8449 | 0.400048189 | -0.16081261  | 3.549777121 | 1.797539695 | NA          | NA |
| ASV_16s_8450 | 0.426140114 | -0.225826849 | 3.549695202 | 1.863495744 | 0.967007646 | NA |
| ASV_16s_8451 | 0.400167974 | -0.31492026  | 3.54973167  | 1.753962936 | NA          | NA |
| ASV_16s_8452 | 0.415417449 | -0.332197258 | 3.549697265 | 1.771956787 | 0.971378166 | NA |
| ASV_16s_8453 | 0.408310776 | -0.375138473 | 3.549712302 | 1.704374719 | 0.974380402 | NA |
| ASV_16s_8454 | 0.405277902 | -0.381707156 | 3.549719439 | 1.688573936 | NA          | NA |
| ASV_16s_8455 | 0.142924728 | -0.533704663 | 3.551105197 | 0.577311333 | NA          | NA |
| ASV_16s_8456 | 0.127557865 | -0.169716658 | 3.550714911 | 0.590950315 | NA          | NA |
| ASV_16s_8457 | 0.418801994 | 0.186595968  | 3.549452137 | 1.875619094 | NA          | NA |
| ASV_16s_8458 | 0.430996153 | 0.156497156  | 3.549442202 | 1.777862522 | 0.971106762 | NA |
| ASV_16s_8459 | 0.410264772 | 0.023142959  | 3.549155692 | 1.836404684 | NA          | NA |
| ASV_16s_8460 | 0.398715409 | 0.030431663  | 3.548780468 | 1.755546739 | 0.972124664 | NA |
| ASV_16s_8461 | 0.428007004 | 0.730707018  | 3.549334527 | 1.662670784 | 0.976138219 | NA |
| ASV_16s_8462 | 0.456319926 | 0.098205759  | 3.548839692 | 2.142417662 | 0.951538904 | NA |
| ASV_16s_8463 | 0.483969058 | -0.389200587 | 3.549882129 | 1.270584587 | 0.989209882 | NA |
| ASV_16s_8464 | 0.485561498 | -0.333125053 | 3.548795955 | 1.461601925 | NA          | NA |
| ASV_16s_8465 | 0.435818477 | 0.909811426  | 3.548968995 | 1.723784333 | 0.973537638 | NA |
| ASV_16s_8466 | 0.504920603 | -0.791992286 | 3.5490163   | 1.610698909 | NA          | NA |
| ASV_16s_8467 | 0.525947497 | -0.79135344  | 3.549092257 | 1.718013622 | NA          | NA |
| ASV_16s_8468 | 0.457413052 | -0.731507336 | 3.549552876 | 1.366982194 | 0.986561172 | NA |
| ASV_16s_8469 | 0.50047605  | -0.755651766 | 3.549493399 | 1.732173225 | NA          | NA |
| ASV_16s_8470 | 0.447642821 | 0.29804548   | 3.551571617 | 0.57622976  | NA          | NA |
| ASV_16s_8471 | 0.508917359 | -0.760218039 | 3.549459863 | 1.745481009 | 0.972576998 | NA |
| ASV_16s_8472 | 0.544817165 | 2.136146545  | 3.549194513 | 0.938503504 | NA          | NA |
| ASV_16s_8473 | 0.496566158 | -0.199692127 | 3.549768673 | 1.65777326  | 0.976339916 | NA |
| ASV_16s_8474 | 0.487796142 | 0.135445901  | 3.548725196 | 1.364462292 | NA          | NA |
| ASV_16s_8475 | 0.674889121 | 0.803008049  | 3.549690459 | 1.838935155 | 0.968214663 | NA |
| ASV_16s_8476 | 0.450116745 | 1.596277403  | 3.539351753 | 0.583928849 | 0.999077469 | NA |
| ASV_16s_8477 | 0.28717434  | -0.093449722 | 3.550610551 | 0.982489072 | 0.995106087 | NA |
| ASV_16s_8478 | 0.555830909 | 0.159241303  | 3.550674549 | 1.47155509  | 0.983278114 | NA |
| ASV_16s_8479 | 0.719482549 | 0.243099562  | 3.54949762  | 2.857860918 | NA          | NA |
| ASV_16s_8480 | 0.42481873  | -0.074682216 | 3.549647564 | 1.339147818 | NA          | NA |
| ASV_16s_8481 | 0.477464171 | -0.080890854 | 3.550061537 | 1.240812972 | NA          | NA |
| ASV_16s_8482 | 0.503392301 | 0.325758873  | 3.550488611 | 0.687233274 | NA          | NA |
| ASV_16s_8483 | 0.516263987 | -0.211095702 | 3.548189508 | 1.927875559 | 0.963724127 | NA |
| ASV_16s_8484 | 0.40438266  | -0.273879513 | 3.549450888 | 1.438418923 | 0.984365362 | NA |
| ASV_16s_8485 | 0.799476446 | 0.419234477  | 3.549544863 | 1.055049191 | NA          | NA |
| ASV_16s_8486 | 0.205322333 | 1.245163595  | 3.550765029 | 0.588126536 | NA          | NA |

|              |             |              |             |             |             |    |
|--------------|-------------|--------------|-------------|-------------|-------------|----|
| ASV_16s_8487 | 0.294251266 | 0.220006502  | 3.550674947 | 0.971556087 | 0.995274419 | NA |
| ASV_16s_8488 | 0.474757047 | 2.22551586   | 3.549490583 | 0.511724797 | 0.999402407 | NA |
| ASV_16s_8489 | 0.328647288 | 0.651000061  | 3.550394203 | 1.00326287  | 0.99477573  | NA |
| ASV_16s_8490 | 0.486703496 | 0.325464962  | 3.547770582 | 0.786519774 | NA          | NA |
| ASV_16s_8491 | 0.571438765 | 0.274941808  | 3.550440416 | 2.410474721 | 0.933686209 | NA |
| ASV_16s_8492 | 0.51719764  | 0.452473011  | 3.550659746 | 2.151114294 | NA          | NA |
| ASV_16s_8493 | 0.32574901  | 0.97914132   | 3.550959259 | 0.928516132 | NA          | NA |
| ASV_16s_8494 | 0.506920778 | 1.220791073  | 3.550183878 | 0.933391491 | NA          | NA |
| ASV_16s_8495 | 0.197962093 | 0.279491651  | 3.551546469 | 0.685783643 | NA          | NA |
| ASV_16s_8496 | 0.569107179 | 0.338231695  | 3.550752546 | 0.976018566 | 0.995206169 | NA |
| ASV_16s_8497 | 0.525209026 | -0.550108817 | 3.549319707 | 0.912674816 | NA          | NA |
| ASV_16s_8498 | 0.484301574 | 1.100247431  | 3.550126476 | 1.531940258 | NA          | NA |
| ASV_16s_8499 | 0.392401438 | -0.117711995 | 3.549696494 | 1.802292503 | NA          | NA |
| ASV_16s_8500 | 0.639996435 | 0.411059063  | 3.548595705 | 1.855936277 | 0.967381837 | NA |
| ASV_16s_8501 | 0.595849918 | 0.924890692  | 3.549909156 | 1.462257668 | 0.983587609 | NA |
| ASV_16s_8502 | 0.528300962 | 0.315939344  | 3.550723286 | 1.432550594 | 0.984553345 | NA |
| ASV_16s_8503 | 0.550549689 | 0.315939077  | 3.5507178   | 1.453462114 | 0.983877211 | NA |
| ASV_16s_8504 | 0.567526549 | 0.378574376  | 3.550705837 | 2.239026515 | 0.945435444 | NA |
| ASV_16s_8505 | 0.531369214 | 0.525072587  | 3.550704185 | 2.480203578 | NA          | NA |
| ASV_16s_8506 | 0.441619564 | 0.688415469  | 3.550704931 | 1.251429703 | NA          | NA |
| ASV_16s_8507 | 0.613447127 | 0.73500564   | 3.550751237 | 1.48379211  | NA          | NA |
| ASV_16s_8508 | 0.613447127 | 0.73500564   | 3.550751237 | 1.48379211  | NA          | NA |
| ASV_16s_8509 | 0.553864017 | 1.184758965  | 3.550022698 | 1.062440334 | 0.993757433 | NA |
| ASV_16s_8510 | 0.303874509 | 0.7343883    | 3.550929438 | 1.127363959 | NA          | NA |
| ASV_16s_8511 | 0.558238693 | 0.693724346  | 3.550685284 | 1.395087903 | 0.985721242 | NA |
| ASV_16s_8512 | 0.526056652 | 0.693696087  | 3.550693404 | 1.364939525 | 0.986621013 | NA |
| ASV_16s_8513 | 0.534745631 | 0.69370404   | 3.550691118 | 1.373235717 | 0.986376961 | NA |
| ASV_16s_8514 | 0.402455183 | -0.042149633 | 3.549859858 | 1.703563133 | NA          | NA |
| ASV_16s_8515 | 0.413394603 | -0.215550098 | 3.549724421 | 1.835878665 | 0.968363109 | NA |
| ASV_16s_8516 | 0.417451743 | -0.225808982 | 3.549712777 | 1.843717542 | NA          | NA |
| ASV_16s_8517 | 0.412629474 | -0.271242693 | 3.549712732 | 1.815152409 | 0.969359427 | NA |
| ASV_16s_8518 | 0.413977503 | -0.294052076 | 3.549704983 | 1.803172463 | 0.969927119 | NA |
| ASV_16s_8519 | 0.396059833 | -0.281441865 | 3.549746545 | 1.77009804  | NA          | NA |
| ASV_16s_8520 | 0.417625388 | -0.348739978 | 3.549692008 | 1.758481298 | 0.971991995 | NA |
| ASV_16s_8521 | 0.402947968 | -0.355961695 | 3.549723371 | 1.716986249 | 0.973834594 | NA |
| ASV_16s_8522 | 0.405739035 | -0.365610161 | 3.549717445 | 1.711225439 | 0.974084734 | NA |
| ASV_16s_8523 | 0.141466312 | -0.530317738 | 3.551114918 | 0.573901763 | NA          | NA |
| ASV_16s_8524 | 0.51578174  | -0.683023399 | 3.549599999 | 1.000012646 | NA          | NA |
| ASV_16s_8525 | 0.40969697  | -0.682047797 | 3.549822782 | 0.925890299 | NA          | NA |
| ASV_16s_8526 | 0.076071289 | -0.169154453 | 3.550855398 | 0.378149139 | NA          | NA |
| ASV_16s_8527 | 0.076071289 | -0.169154453 | 3.550855398 | 0.378149139 | NA          | NA |
| ASV_16s_8528 | 0.133126325 | 0.22009695   | 3.550793872 | 0.583444013 | NA          | NA |
| ASV_16s_8529 | 0.474560704 | 0.077252494  | 3.548715734 | 2.161743291 | NA          | NA |
| ASV_16s_8530 | 0.407589156 | 0.148694569  | 3.548944859 | 2.010022325 | NA          | NA |
| ASV_16s_8531 | 0.566831117 | -0.767033644 | 3.548953693 | 1.591803415 | NA          | NA |
| ASV_16s_8532 | 0.436288432 | -0.540632937 | 3.549261003 | 1.380530375 | 0.98616015  | NA |
| ASV_16s_8533 | 0.444917187 | 0.365471681  | 3.549262555 | 1.787439992 | NA          | NA |
| ASV_16s_8534 | 0.457291053 | 0.016821854  | 3.548804282 | 2.099392239 | 0.954134847 | NA |
| ASV_16s_8535 | 0.508239611 | -0.551144078 | 3.549105642 | 1.69992389  | NA          | NA |
| ASV_16s_8536 | 0.488835417 | -0.791267509 | 3.549146483 | 1.630169702 | 0.977458161 | NA |
| ASV_16s_8537 | 0.545614709 | 0.264751401  | 3.548973998 | 2.369004335 | 0.936634047 | NA |
| ASV_16s_8538 | 0.496727783 | -0.780081741 | 3.549353175 | 1.512518637 | 0.981873098 | NA |
| ASV_16s_8539 | 0.562338712 | -0.023799242 | 3.328410835 | 1.838775457 | 0.968222429 | NA |
| ASV_16s_8540 | 0.536576837 | 0.17260816   | 3.336003525 | 2.053537635 | 0.95681779  | NA |
| ASV_16s_8541 | 0.522451561 | -0.829446719 | 3.549161849 | 1.532139848 | 0.981176073 | NA |
| ASV_16s_8542 | 0.352265633 | 1.126438832  | 3.549087991 | 1.298793096 | NA          | NA |
| ASV_16s_8543 | 0.523516934 | -0.76922142  | 3.549386325 | 1.766783329 | 0.971614722 | NA |
| ASV_16s_8544 | 0.442864115 | -0.269538532 | 3.549489948 | 1.59021453  | NA          | NA |
| ASV_16s_8545 | 0.516808413 | 0.51274657   | 3.548814344 | 1.865758975 | 0.966895152 | NA |
| ASV_16s_8546 | 0.48538072  | -0.746519355 | 3.549539662 | 1.70684044  | 0.974274209 | NA |
| ASV_16s_8547 | 0.508334502 | -0.803745543 | 3.549349531 | 1.48839577  | 0.98270868  | NA |
| ASV_16s_8548 | 0.491977378 | -0.764599021 | 3.549616844 | 1.764832746 | 0.971703622 | NA |
| ASV_16s_8549 | 0.482108017 | 0.168816439  | 3.549853409 | 1.885814013 | 0.965888964 | NA |
| ASV_16s_8550 | 0.501697092 | 0.220146574  | 3.548716065 | 2.188664601 | NA          | NA |
| ASV_16s_8551 | 0.485157101 | -0.384019295 | 3.549019432 | 1.484064606 | 0.98285622  | NA |
| ASV_16s_8552 | 0.495945965 | 0.338203839  | 3.551053639 | 0.875375224 | NA          | NA |
| ASV_16s_8553 | 0.544539183 | 0.183750208  | 3.550558324 | 1.479232014 | 0.983019949 | NA |

|              |             |              |             |             |             |    |
|--------------|-------------|--------------|-------------|-------------|-------------|----|
| ASV_16s_8554 | 0.48845535  | 0.183782484  | 3.550573726 | 1.419325858 | 0.984971965 | NA |
| ASV_16s_8555 | 0.424490107 | -0.616560275 | 3.549629091 | 1.553787961 | NA          | NA |
| ASV_16s_8556 | 0.527120318 | 0.682949811  | 3.550707039 | 1.420272696 | 0.984942224 | NA |
| ASV_16s_8557 | 0.421489947 | -0.073091576 | 3.550041764 | 1.640864137 | NA          | NA |
| ASV_16s_8558 | 0.265396083 | 0.982099496  | 3.550496232 | 0.880240126 | 0.996536268 | NA |
| ASV_16s_8559 | 0.438461587 | 0.12404372   | 3.55016761  | 1.483337888 | 0.982880901 | NA |
| ASV_16s_8560 | 0.579225435 | -0.56652595  | 3.549381708 | 1.014832881 | NA          | NA |
| ASV_16s_8561 | 0.373985766 | -0.565021367 | 3.549763751 | 0.874064641 | NA          | NA |
| ASV_16s_8562 | 0.468209205 | -0.567707269 | 3.548712703 | 1.167624572 | NA          | NA |
| ASV_16s_8563 | 0.142739879 | 0.366512731  | 3.551490342 | 0.495668219 | NA          | NA |
| ASV_16s_8564 | 0.142739879 | 0.366512731  | 3.551490342 | 0.495668219 | NA          | NA |
| ASV_16s_8565 | 0.256361469 | -0.547408811 | 3.549978075 | 0.682831569 | NA          | NA |
| ASV_16s_8566 | 0.279295456 | 0.220010348  | 3.55068022  | 0.945151633 | 0.995665465 | NA |
| ASV_16s_8567 | 0.313347154 | 0.5690264    | 3.550417038 | 1.110241217 | NA          | NA |
| ASV_16s_8568 | 0.422603708 | -0.068792417 | 3.54979878  | 1.858273146 | NA          | NA |
| ASV_16s_8569 | 0.406710903 | -0.512513319 | 3.549780249 | 1.211658713 | NA          | NA |
| ASV_16s_8570 | 0.5816158   | 1.112869636  | 3.550261031 | 1.293936132 | 0.988600848 | NA |
| ASV_16s_8571 | 0.566315187 | 0.054406559  | 3.549619134 | 1.887614941 | NA          | NA |
| ASV_16s_8572 | 0.315883489 | 0.588411767  | 3.550871033 | 1.089878036 | NA          | NA |
| ASV_16s_8573 | 0.118388228 | 0.282859541  | 3.551699611 | 0.5066206   | NA          | NA |
| ASV_16s_8574 | 0.195942071 | 0.279477358  | 3.551551296 | 0.682077725 | NA          | NA |
| ASV_16s_8575 | 0.388965691 | 1.188547908  | 3.550442151 | 0.844500507 | NA          | NA |
| ASV_16s_8576 | 0.43904023  | -0.498113409 | 3.549831946 | 1.015113888 | NA          | NA |
| ASV_16s_8577 | 0.681717428 | 0.985147441  | 3.549645968 | 1.643872761 | 0.976906976 | NA |
| ASV_16s_8578 | 0.537798538 | 0.358185927  | 3.550138724 | 1.789326725 | 0.970575755 | NA |
| ASV_16s_8579 | 0.407367884 | -0.063275742 | 3.549831454 | 1.869564055 | NA          | NA |
| ASV_16s_8580 | 0.562047255 | 0.591711683  | 3.550024551 | 1.848210655 | NA          | NA |
| ASV_16s_8581 | 0.439451331 | 0.360404277  | 3.550825232 | 1.378001597 | NA          | NA |
| ASV_16s_8582 | 0.498826795 | 0.315939362  | 3.550731311 | 1.403360676 | 0.985468108 | NA |
| ASV_16s_8583 | 0.485071644 | 0.315939363  | 3.550735388 | 1.389158769 | 0.985901009 | NA |
| ASV_16s_8584 | 0.530610048 | 0.79241226   | 3.550211803 | 2.031724452 | 0.958063625 | NA |
| ASV_16s_8585 | 0.593458003 | 1.141569384  | 3.550242932 | 1.139663629 | 0.992250438 | NA |
| ASV_16s_8586 | 0.529023077 | 1.069212547  | 3.550437433 | 1.130339242 | 0.992443398 | NA |
| ASV_16s_8587 | 0.593812071 | 1.021802043  | 3.550511831 | 1.214475673 | 0.99058977  | NA |
| ASV_16s_8588 | 0.300773749 | 0.734375863  | 3.550933071 | 1.122170156 | NA          | NA |
| ASV_16s_8589 | 0.573074065 | 0.693736692  | 3.550681845 | 1.408433142 | 0.985311564 | NA |
| ASV_16s_8590 | 0.064769869 | 0.678839466  | 3.551955164 | 0.225395065 | 0.999962149 | NA |
| ASV_16s_8591 | 0.39192317  | -0.211471144 | 3.54977359  | 1.785254868 | NA          | NA |
| ASV_16s_8592 | 0.391951691 | -0.248403088 | 3.549762803 | 1.77703181  | NA          | NA |
| ASV_16s_8593 | 0.405682329 | -0.333912813 | 3.549717897 | 1.748116074 | NA          | NA |
| ASV_16s_8594 | 0.140007897 | -0.526730947 | 3.551123964 | 0.570453258 | NA          | NA |
| ASV_16s_8595 | 0.140007897 | -0.526730947 | 3.551123964 | 0.570453258 | NA          | NA |
| ASV_16s_8596 | 0.526168563 | -0.683100548 | 3.549582997 | 1.006424745 | NA          | NA |
| ASV_16s_8597 | 0.140726007 | 0.123065485  | 3.550739523 | 0.94677976  | 0.995641981 | NA |
| ASV_16s_8598 | 0.131753889 | 0.220098675  | 3.550796132 | 0.578746183 | NA          | NA |
| ASV_16s_8599 | 0.4394963   | -0.53384172  | 3.549640353 | 1.627155979 | NA          | NA |
| ASV_16s_8600 | 0.427298601 | -0.028697788 | 3.54962101  | 2.282077316 | 0.94259452  | NA |
| ASV_16s_8601 | 0.440998193 | 0.053834679  | 3.54914211  | 1.92638089  | 0.96380232  | NA |
| ASV_16s_8602 | 0.433535867 | 0.307953493  | 3.549085195 | 2.00958378  | NA          | NA |
| ASV_16s_8603 | 0.43497087  | 0.104954462  | 3.549022003 | 1.975727527 | 0.961171557 | NA |
| ASV_16s_8604 | 0.41055363  | 0.067624645  | 3.54921512  | 1.906960983 | 0.964809796 | NA |
| ASV_16s_8605 | 0.400430743 | 0.06635347   | 3.549240352 | 1.879328169 | NA          | NA |
| ASV_16s_8606 | 0.468471693 | 0.279432198  | 3.549048529 | 1.651413743 | 0.976600339 | NA |
| ASV_16s_8607 | 0.536700294 | -0.793299687 | 3.548953854 | 1.395909867 | 0.985696212 | NA |
| ASV_16s_8608 | 0.489390626 | -0.209091061 | 3.54874783  | 1.703555216 | 0.97441564  | NA |
| ASV_16s_8609 | 0.452625557 | 0.621129235  | 3.548789172 | 1.862360727 | 0.967063981 | NA |
| ASV_16s_8610 | 0.13934117  | -0.492539186 | 3.55087848  | 0.48598003  | NA          | NA |
| ASV_16s_8611 | 0.479626487 | 0.913168456  | 3.548355392 | 1.606338708 | 0.978398274 | NA |
| ASV_16s_8612 | 0.41951587  | 0.300860112  | 3.549067664 | 2.051312246 | NA          | NA |
| ASV_16s_8613 | 0.501914087 | -0.79142049  | 3.549105161 | 1.654084339 | 0.976491182 | NA |
| ASV_16s_8614 | 0.50067046  | -0.839516121 | 3.549176724 | 1.459413822 | 0.983681584 | NA |
| ASV_16s_8615 | 0.519632087 | -0.791604196 | 3.549054643 | 1.686618776 | 0.975137641 | NA |
| ASV_16s_8616 | 0.492276138 | -0.790820096 | 3.54921573  | 1.664812191 | 0.976049717 | NA |
| ASV_16s_8617 | 0.508493031 | -0.781877232 | 3.549305267 | 1.726574008 | 0.973415221 | NA |
| ASV_16s_8618 | 0.540948276 | -0.790554437 | 3.549174662 | 1.771695659 | 0.971390133 | NA |
| ASV_16s_8619 | 0.490306856 | -0.770455822 | 3.549401818 | 1.703239886 | 0.974429191 | NA |
| ASV_16s_8620 | 0.464530989 | 0.161626956  | 3.549363559 | 2.033213607 | 0.957979199 | NA |

|              |             |              |             |             |             |    |
|--------------|-------------|--------------|-------------|-------------|-------------|----|
| ASV_16s_8621 | 0.559459806 | 0.344769685  | 3.55011062  | 1.944606292 | NA          | NA |
| ASV_16s_8622 | 0.474368407 | -0.095673118 | 3.550104622 | 1.37606977  | 0.986292975 | NA |
| ASV_16s_8623 | 0.430864769 | -0.374604052 | 3.54931607  | 1.425385139 | 0.984781024 | NA |
| ASV_16s_8624 | 0.559625278 | 0.084295143  | 3.549604941 | 2.105495781 | 0.953771207 | NA |
| ASV_16s_8625 | 0.435319177 | -0.076385507 | 3.550137416 | 1.592574332 | 0.978930614 | NA |
| ASV_16s_8626 | 0.4484799   | -0.532411935 | 3.549565467 | 1.084858339 | 0.993341099 | NA |
| ASV_16s_8627 | 0.438780276 | -0.542035569 | 3.549457332 | 1.173623008 | NA          | NA |
| ASV_16s_8628 | 0.584294576 | 1.10926714   | 3.548724465 | 1.82452583  | 0.968911067 | NA |
| ASV_16s_8629 | 0.593200568 | 1.339440121  | 3.549770805 | 1.002976055 | NA          | NA |
| ASV_16s_8630 | 0.408288475 | 0.260228761  | 3.549457992 | 1.678812807 | 0.975466398 | NA |
| ASV_16s_8631 | 0.408658434 | -0.069201632 | 3.549799417 | 1.880030815 | NA          | NA |
| ASV_16s_8632 | 0.421296167 | -0.069222921 | 3.549771349 | 1.911197881 | 0.964591334 | NA |
| ASV_16s_8633 | 0.413118099 | -0.069096711 | 3.549773756 | 1.883464295 | NA          | NA |
| ASV_16s_8634 | 0.382578139 | 0.224335486  | 3.549794279 | 1.003903743 | NA          | NA |
| ASV_16s_8635 | 0.387648521 | -0.255272627 | 3.549585052 | 1.46464915  | 0.983508332 | NA |
| ASV_16s_8636 | 0.565373682 | 1.209141196  | 3.549909644 | 1.381554266 | 0.986129552 | NA |
| ASV_16s_8637 | 0.341573222 | 0.28888833   | 3.55112905  | 0.880809885 | NA          | NA |
| ASV_16s_8638 | 0.235468854 | 0.279735794  | 3.551468684 | 0.74898881  | NA          | NA |
| ASV_16s_8639 | 0.543051227 | 0.249835503  | 3.550449024 | 1.543158688 | 0.980777781 | NA |
| ASV_16s_8640 | 0.530773247 | 0.344055772  | 3.549815849 | 1.887216303 | NA          | NA |
| ASV_16s_8641 | 0.516993643 | 0.360837858  | 3.550411674 | 1.090974142 | 0.993224546 | NA |
| ASV_16s_8642 | 0.434920905 | 0.360403545  | 3.550827641 | 1.372727621 | NA          | NA |
| ASV_16s_8643 | 0.504732421 | 0.315939211  | 3.550729632 | 1.409298645 | 0.985284752 | NA |
| ASV_16s_8644 | 0.454258214 | 0.464594924  | 3.550729273 | 2.312267071 | NA          | NA |
| ASV_16s_8645 | 0.454258214 | 0.577180085  | 3.5507185   | 2.164433802 | NA          | NA |
| ASV_16s_8646 | 0.297672988 | 0.734362257  | 3.550936777 | 1.116923942 | NA          | NA |
| ASV_16s_8647 | 0.297672988 | 0.734362257  | 3.550936777 | 1.116923942 | NA          | NA |
| ASV_16s_8648 | 0.568575596 | 0.693733428  | 3.55068287  | 1.404417529 | 0.985435576 | NA |
| ASV_16s_8649 | 0.523779057 | 0.693694709  | 3.550694019 | 1.36271415  | 0.986686021 | NA |
| ASV_16s_8650 | 0.624681019 | 0.693774173  | 3.55067116  | 1.452225428 | 0.983917682 | NA |
| ASV_16s_8651 | 0.409483518 | -0.17705831  | 3.549748063 | 1.824328701 | NA          | NA |
| ASV_16s_8652 | 0.397966436 | -0.21673942  | 3.549757842 | 1.799314295 | NA          | NA |
| ASV_16s_8653 | 0.416124334 | -0.238632919 | 3.549712083 | 1.837375034 | 0.968290483 | NA |
| ASV_16s_8654 | 0.393926407 | -0.227893625 | 3.54976361  | 1.78778308  | 0.970647574 | NA |
| ASV_16s_8655 | 0.39893373  | -0.32185247  | 3.549733774 | 1.744539686 | 0.972619083 | NA |
| ASV_16s_8656 | 0.391980546 | -0.333199818 | 3.549748856 | 1.717093071 | NA          | NA |
| ASV_16s_8657 | 0.393258028 | -0.350193313 | 3.549745395 | 1.701521888 | 0.97450295  | NA |
| ASV_16s_8658 | 0.391997658 | -0.357653382 | 3.549748409 | 1.689786942 | NA          | NA |
| ASV_16s_8659 | 0.407351122 | -0.408033882 | 3.549718198 | 1.653500302 | 0.976515079 | NA |
| ASV_16s_8660 | 0.395588298 | -0.429026504 | 3.549749169 | 1.587814092 | 0.979112906 | NA |
| ASV_16s_8661 | 0.470736532 | -0.563507484 | 3.549591592 | 1.656078076 | 0.976409497 | NA |
| ASV_16s_8662 | 0.422304684 | -0.348666324 | 3.550180063 | 1.366400059 | NA          | NA |
| ASV_16s_8663 | 0.397606599 | -0.33825417  | 3.549094833 | 1.241537248 | NA          | NA |
| ASV_16s_8664 | 0.398867133 | 0.247793802  | 3.54904691  | 1.974972279 | NA          | NA |
| ASV_16s_8665 | 0.446369262 | -0.446419281 | 3.54925682  | 1.560060509 | 0.980157224 | NA |
| ASV_16s_8666 | 0.558939573 | -0.793306144 | 3.54882794  | 1.514892312 | NA          | NA |
| ASV_16s_8667 | 0.496469835 | -0.792444063 | 3.548997544 | 1.509708613 | 0.981971644 | NA |
| ASV_16s_8668 | 0.457153242 | 0.712442932  | 3.548596746 | 1.886349549 | 0.965861865 | NA |
| ASV_16s_8669 | 0.330617554 | 0.595888772  | 3.549238194 | 1.492457486 | NA          | NA |
| ASV_16s_8670 | 0.415402939 | 1.376576685  | 3.548627635 | 1.422481135 | NA          | NA |
| ASV_16s_8671 | 0.473935749 | -0.790849224 | 3.549235357 | 1.617533339 | NA          | NA |
| ASV_16s_8672 | 0.457783716 | -1.265100872 | 3.549353267 | 0.727802564 | 0.998112875 | NA |
| ASV_16s_8673 | 0.500405736 | -0.78362557  | 3.549295477 | 1.706617522 | 0.97428382  | NA |
| ASV_16s_8674 | 0.476565847 | -0.75651368  | 3.549506138 | 1.686705237 | 0.975133985 | NA |
| ASV_16s_8675 | 0.50701074  | -0.756316225 | 3.549485903 | 1.743433762 | 0.97266848  | NA |
| ASV_16s_8676 | 0.511847112 | 0.031986591  | 3.548940604 | 1.540196061 | 0.980885355 | NA |
| ASV_16s_8677 | 0.571277755 | -0.331908731 | 3.54891565  | 2.265337449 | NA          | NA |
| ASV_16s_8678 | 0.442667595 | 0.517700448  | 3.549128872 | 1.13211641  | NA          | NA |
| ASV_16s_8679 | 0.487876028 | -0.068213912 | 3.550188987 | 1.578424356 | 0.979469757 | NA |
| ASV_16s_8680 | 0.524689091 | 0.250575404  | 3.549024324 | 1.600908658 | 0.978609213 | NA |
| ASV_16s_8681 | 0.483938463 | -0.669658734 | 3.549157311 | 1.200844746 | 0.990907435 | NA |
| ASV_16s_8682 | 0.503316912 | 0.065823906  | 3.55054022  | 2.187474691 | 0.948739387 | NA |
| ASV_16s_8683 | 0.526212928 | 0.223142334  | 3.550655722 | 2.40488619  | 0.934087345 | NA |
| ASV_16s_8684 | 0.391363255 | 0.304514241  | 3.550675776 | 1.958627788 | NA          | NA |
| ASV_16s_8685 | 0.338615568 | 1.070972197  | 3.54944655  | 1.187623246 | NA          | NA |
| ASV_16s_8686 | 0.477101077 | 1.904835274  | 3.549610111 | 0.876856329 | NA          | NA |
| ASV_16s_8687 | 0.252224974 | 1.655827345  | 3.550449841 | 0.450920386 | NA          | NA |



|              |             |              |             |             |             |    |
|--------------|-------------|--------------|-------------|-------------|-------------|----|
| ASV_16s_8688 | 0.634088708 | 2.339685305  | 3.549143383 | 0.608521138 | NA          | NA |
| ASV_16s_8689 | 0.622875571 | -0.270165979 | 3.547510563 | 1.310625076 | NA          | NA |
| ASV_16s_8690 | 0.606383673 | -0.566672799 | 3.549350455 | 1.029573936 | NA          | NA |
| ASV_16s_8691 | 0.139796788 | 0.365411638  | 3.551507206 | 0.489032505 | NA          | NA |
| ASV_16s_8692 | 0.162392187 | 0.0891728    | 3.550804896 | 0.894997036 | NA          | NA |
| ASV_16s_8693 | 0.369717557 | -0.011572029 | 3.549505106 | 1.467387019 | 0.983417291 | NA |
| ASV_16s_8694 | 0.251075665 | -0.547298074 | 3.550005039 | 0.676206677 | NA          | NA |
| ASV_16s_8695 | 0.307607189 | 0.120077408  | 3.549661726 | 1.379081059 | NA          | NA |
| ASV_16s_8696 | 0.199036955 | 1.237495826  | 3.550792028 | 0.577437669 | NA          | NA |
| ASV_16s_8697 | 0.199036955 | 1.237495826  | 3.550792028 | 0.577437669 | NA          | NA |
| ASV_16s_8698 | 0.268890331 | 0.220013597  | 3.550684236 | 0.925940819 | 0.995936415 | NA |
| ASV_16s_8699 | 0.270657608 | 0.220013063  | 3.550683533 | 0.929250825 | 0.995890535 | NA |
| ASV_16s_8700 | 0.285365686 | 0.22008882   | 3.550678016 | 0.956007723 | NA          | NA |
| ASV_16s_8701 | 0.285365686 | 0.22008882   | 3.550678016 | 0.956007723 | NA          | NA |
| ASV_16s_8702 | 0.298103178 | 0.224857915  | 3.550731486 | 0.766632423 | NA          | NA |
| ASV_16s_8703 | 0.355723607 | 0.448431403  | 3.549124245 | 1.293948705 | NA          | NA |
| ASV_16s_8704 | 0.465333771 | 0.630690044  | 3.550662089 | 1.022681339 | 0.99445431  | NA |
| ASV_16s_8705 | 0.41489244  | -0.069274946 | 3.549837654 | 1.879018401 | 0.966231791 | NA |
| ASV_16s_8706 | 0.409083191 | -0.069075742 | 3.549780865 | 1.872297288 | NA          | NA |
| ASV_16s_8707 | 0.396294818 | 0.370766333  | 3.551229481 | 0.858515224 | NA          | NA |
| ASV_16s_8708 | 0.233016053 | 0.279720894  | 3.551473191 | 0.745143622 | NA          | NA |
| ASV_16s_8709 | 0.38094578  | 1.185202123  | 3.550462564 | 0.837353622 | NA          | NA |
| ASV_16s_8710 | 0.44760549  | -0.927705567 | 3.549748133 | 0.796771957 | NA          | NA |
| ASV_16s_8711 | 0.635881712 | 0.450171291  | 3.54848441  | 1.263859784 | NA          | NA |
| ASV_16s_8712 | 0.523550338 | 2.116090149  | 3.548714394 | 0.400805243 | NA          | NA |
| ASV_16s_8713 | 0.618964969 | 0.497199175  | 3.550703249 | 2.565548717 | NA          | NA |
| ASV_16s_8714 | 0.535491767 | 0.31593928   | 3.550721472 | 1.439315102 | 0.984336534 | NA |
| ASV_16s_8715 | 0.463556378 | 0.315939397  | 3.550742252 | 1.366095674 | 0.986587163 | NA |
| ASV_16s_8716 | 0.473061358 | 0.717009434  | 3.54987618  | 1.805993146 | 0.969793995 | NA |
| ASV_16s_8717 | 0.428100597 | 0.688400806  | 3.550709679 | 1.235621413 | NA          | NA |
| ASV_16s_8718 | 0.497380916 | 0.693668968  | 3.550701528 | 1.336440065 | 0.987439011 | NA |
| ASV_16s_8719 | 0.543044945 | 0.693711819  | 3.550689002 | 1.381041419 | 0.986144883 | NA |
| ASV_16s_8720 | 0.550435138 | 0.693717015  | 3.55068717  | 1.387902711 | 0.985938914 | NA |
| ASV_16s_8721 | 0.38771269  | -0.086213407 | 3.54985722  | 1.71895093  | NA          | NA |
| ASV_16s_8722 | 0.388535079 | -0.171329458 | 3.549798904 | 1.772839796 | NA          | NA |
| ASV_16s_8723 | 0.412296817 | -0.263869969 | 3.549714716 | 1.818255074 | 0.969211423 | NA |
| ASV_16s_8724 | 0.406114686 | -0.288621473 | 3.549722779 | 1.788856075 | 0.970597663 | NA |
| ASV_16s_8725 | 0.387883812 | -0.314498264 | 3.549760092 | 1.725145494 | 0.973477948 | NA |
| ASV_16s_8726 | 0.38383808  | -0.31977434  | 3.549769265 | 1.710702727 | NA          | NA |
| ASV_16s_8727 | 0.408737879 | -0.34353109  | 3.549710911 | 1.74452199  | 0.972619874 | NA |
| ASV_16s_8728 | 0.417728189 | -0.348784757 | 3.549691852 | 1.758559338 | 0.971988462 | NA |
| ASV_16s_8729 | 0.396934564 | -0.68189245  | 3.549857591 | 0.915682362 | NA          | NA |
| ASV_16s_8730 | 0.122351422 | -0.169680282 | 3.550723773 | 0.572264826 | NA          | NA |
| ASV_16s_8731 | 0.122351422 | -0.169680282 | 3.550723773 | 0.572264826 | NA          | NA |
| ASV_16s_8732 | 0.418499027 | -0.133834061 | 3.549651656 | 1.743826605 | 0.972650939 | NA |
| ASV_16s_8733 | 0.419832424 | 0.190728704  | 3.549253998 | 1.940589532 | NA          | NA |
| ASV_16s_8734 | 0.437590053 | 0.146377905  | 3.549238471 | 1.982807768 | 0.960785781 | NA |
| ASV_16s_8735 | 0.048301774 | 0.751970852  | 3.551940456 | 0.194036867 | 0.99997732  | NA |
| ASV_16s_8736 | 0.391404111 | 0.029807215  | 3.549306419 | 1.76490219  | NA          | NA |
| ASV_16s_8737 | 0.428847794 | 0.02401076   | 3.549157415 | 1.915917742 | 0.964347088 | NA |
| ASV_16s_8738 | 0.477818339 | -0.141850574 | 3.548798493 | 1.757137939 | 0.972052772 | NA |
| ASV_16s_8739 | 0.532199354 | -0.793232288 | 3.54894596  | 1.408353395 | 0.985314033 | NA |
| ASV_16s_8740 | 0.42006484  | -0.03304141  | 3.548892059 | 1.878269025 | NA          | NA |
| ASV_16s_8741 | 0.479876333 | -0.791525819 | 3.549120298 | 1.582209455 | NA          | NA |
| ASV_16s_8742 | 0.476768506 | -0.790757546 | 3.549236287 | 1.626476621 | 0.977605384 | NA |
| ASV_16s_8743 | 0.497087873 | -0.622905662 | 3.549081008 | 1.655112013 | 0.976449098 | NA |
| ASV_16s_8744 | 0.494024517 | -0.791232142 | 3.549145806 | 1.646282709 | 0.976809237 | NA |
| ASV_16s_8745 | 0.401208406 | -0.23590004  | 3.549997868 | 1.409361535 | NA          | NA |
| ASV_16s_8746 | 0.542710835 | -0.791720175 | 3.549013456 | 1.73501382  | NA          | NA |
| ASV_16s_8747 | 0.455830432 | -1.265329179 | 3.549359037 | 0.726617191 | NA          | NA |
| ASV_16s_8748 | 0.483032617 | -0.782999368 | 3.549317871 | 1.669862798 | 0.975840226 | NA |
| ASV_16s_8749 | 0.495310378 | -0.783825629 | 3.549298563 | 1.695307574 | 0.974768726 | NA |
| ASV_16s_8750 | 0.435999039 | -0.655513551 | 3.549329224 | 1.673732511 | 0.975679002 | NA |
| ASV_16s_8751 | 0.500117082 | -0.877179573 | 3.549083228 | 1.378905764 | 0.986208617 | NA |
| ASV_16s_8752 | 0.474801875 | -0.750212338 | 3.29986205  | 1.750591017 | 0.972347893 | NA |
| ASV_16s_8753 | 0.507228511 | -0.756622485 | 3.549484329 | 1.743650751 | 0.972658792 | NA |
| ASV_16s_8754 | 0.410218498 | 0.422975789  | 3.548544483 | 1.114441938 | NA          | NA |

|              |             |              |             |             |             |    |
|--------------|-------------|--------------|-------------|-------------|-------------|----|
| ASV_16s_8755 | 0.477517169 | -0.695282863 | 3.549711742 | 1.693578715 | 0.974842381 | NA |
| ASV_16s_8756 | 0.497817767 | 2.161023917  | 3.549503659 | 0.568122896 | 0.999156846 | NA |
| ASV_16s_8757 | 0.463752716 | 1.517005186  | 3.549628405 | 1.220145765 | NA          | NA |
| ASV_16s_8758 | 0.311183546 | 0.31048543   | 3.549994221 | 1.298120301 | NA          | NA |
| ASV_16s_8759 | 0.425858262 | -0.633526615 | 3.549408769 | 1.164742235 | NA          | NA |
| ASV_16s_8760 | 0.635420768 | 1.339721851  | 3.549706223 | 1.025120331 | NA          | NA |
| ASV_16s_8761 | 0.330368584 | 0.063609032  | 3.54978427  | 1.479355575 | NA          | NA |
| ASV_16s_8762 | 0.413415439 | -0.071373648 | 3.550109356 | 1.502750438 | NA          | NA |
| ASV_16s_8763 | 0.264125202 | 0.220014963  | 3.55068618  | 0.916896786 | 0.996060079 | NA |
| ASV_16s_8764 | 0.266952846 | 0.220014082  | 3.550685018 | 0.922275851 | 0.995986827 | NA |
| ASV_16s_8765 | 0.268366669 | 0.220013648  | 3.550684447 | 0.924944475 | 0.99595016  | NA |
| ASV_16s_8766 | 0.271362271 | 0.220012704  | 3.550683255 | 0.930553374 | 0.995872389 | NA |
| ASV_16s_8767 | 0.282361837 | 0.220009712  | 3.550679097 | 0.950643371 | NA          | NA |
| ASV_16s_8768 | 0.282361837 | 0.220009712  | 3.550679097 | 0.950643371 | NA          | NA |
| ASV_16s_8769 | 0.282361837 | 0.220009712  | 3.550679097 | 0.950643371 | NA          | NA |
| ASV_16s_8770 | 0.419907013 | 0.277361895  | 3.54893352  | 1.026006062 | NA          | NA |
| ASV_16s_8771 | 0.451413446 | 1.069943752  | 3.549713511 | 1.378765432 | NA          | NA |
| ASV_16s_8772 | 0.323970242 | -0.387110132 | 3.550605184 | 0.962034056 | NA          | NA |
| ASV_16s_8773 | 0.531119182 | 1.957581916  | 3.549434255 | 0.788012527 | NA          | NA |
| ASV_16s_8774 | 0.451008982 | 0.370796703  | 3.551136009 | 0.917155175 | NA          | NA |
| ASV_16s_8775 | 0.426080288 | -0.049549489 | 3.550430997 | 1.534251184 | NA          | NA |
| ASV_16s_8776 | 0.511170663 | 1.203758664  | 3.549784257 | 0.944056965 | NA          | NA |
| ASV_16s_8777 | 0.591248189 | 1.717526277  | 3.549877084 | 0.858059554 | 0.996805307 | NA |
| ASV_16s_8778 | 0.114726737 | 0.283167644  | 3.55170796  | 0.49646112  | NA          | NA |
| ASV_16s_8779 | 0.376935825 | 1.183510528  | 3.550473066 | 0.833724346 | NA          | NA |
| ASV_16s_8780 | 0.524777718 | 0.17008175   | 3.550672873 | 1.529882196 | 0.98125707  | NA |
| ASV_16s_8781 | 0.701123733 | 0.277264292  | 3.54892445  | 2.096594966 | 0.954300993 | NA |
| ASV_16s_8782 | 0.545210488 | 0.344021183  | 3.549779296 | 1.990890468 | 0.960342837 | NA |
| ASV_16s_8783 | 0.53182009  | 0.337366971  | 3.550709265 | 1.151661767 | 0.991997625 | NA |
| ASV_16s_8784 | 0.425860053 | 0.360402031  | 3.550832611 | 1.362013315 | NA          | NA |
| ASV_16s_8785 | 0.51501296  | 0.315939219  | 3.550726799 | 1.419511671 | 0.984966131 | NA |
| ASV_16s_8786 | 0.521460052 | 0.315939271  | 3.550725077 | 1.425829883 | 0.984766952 | NA |
| ASV_16s_8787 | 0.520226753 | 0.315939256  | 3.550725405 | 1.424603231 | 0.984805745 | NA |
| ASV_16s_8788 | 0.605384516 | 1.068939929  | 3.55065409  | 1.230464304 | 0.990208465 | NA |
| ASV_16s_8789 | 0.550008105 | 1.047969745  | 3.550469789 | 1.161238162 | 0.991792168 | NA |
| ASV_16s_8790 | 0.502215176 | 0.693674171  | 3.550700096 | 1.341338519 | 0.987300654 | NA |
| ASV_16s_8791 | 0.322308696 | 1.273271435  | 3.550584512 | 0.705707989 | 0.998291494 | NA |
| ASV_16s_8792 | 0.388851374 | -0.29936612  | 3.5497599   | 1.739984001 | 0.972822239 | NA |
| ASV_16s_8793 | 0.399270886 | -0.329883164 | 3.54973242  | 1.73737861  | 0.972938034 | NA |
| ASV_16s_8794 | 0.386088828 | -0.32937272  | 3.549763075 | 1.706937918 | 0.974270006 | NA |
| ASV_16s_8795 | 0.409287314 | -0.417602953 | 3.549715633 | 1.6419463   | 0.976984934 | NA |
| ASV_16s_8796 | 0.13563265  | -0.515788664 | 3.551151793 | 0.559929573 | NA          | NA |
| ASV_16s_8797 | 0.13563265  | -0.515788664 | 3.551151793 | 0.559929573 | NA          | NA |
| ASV_16s_8798 | 0.556662342 | -0.683313434 | 3.549536753 | 1.024523674 | 0.994423175 | NA |
| ASV_16s_8799 | 0.121049811 | -0.169671076 | 3.550726107 | 0.567506406 | NA          | NA |
| ASV_16s_8800 | 0.13385681  | 0.005806127  | 3.550715994 | 1.008320199 | 0.994693201 | NA |
| ASV_16s_8801 | 0.12627401  | 0.010382507  | 3.550727685 | 0.961121894 | 0.995431551 | NA |
| ASV_16s_8802 | 0.408212203 | 0.042284937  | 3.549714611 | 1.763257263 | 0.97177531  | NA |
| ASV_16s_8803 | 0.400445441 | 0.125122239  | 3.549557521 | 1.803681506 | NA          | NA |
| ASV_16s_8804 | 0.411049576 | 0.314599012  | 3.54958539  | 1.770460592 | 0.971446694 | NA |
| ASV_16s_8805 | 0.390309182 | -0.23041541  | 3.549270762 | 1.17758355  | NA          | NA |
| ASV_16s_8806 | 0.487282718 | -0.792380054 | 3.54904989  | 1.400116196 | NA          | NA |
| ASV_16s_8807 | 0.509636214 | -0.447860149 | 3.549039847 | 1.94489712  | 0.962827076 | NA |
| ASV_16s_8808 | 0.419459105 | -0.508435627 | 3.550097906 | 1.161567264 | 0.991785049 | NA |
| ASV_16s_8809 | 0.424560885 | 1.018805516  | 3.54895981  | 1.625110093 | 0.977659717 | NA |
| ASV_16s_8810 | 0.49553565  | -0.79200328  | 3.549031544 | 1.578596998 | 0.979463228 | NA |
| ASV_16s_8811 | 0.515701711 | -0.792048458 | 3.548992455 | 1.636843159 | 0.9771907   | NA |
| ASV_16s_8812 | 0.475388125 | -0.787651152 | 3.549135484 | 1.574102931 | 0.979632775 | NA |
| ASV_16s_8813 | 0.502771908 | -0.790920918 | 3.549192494 | 1.686310674 | 0.975150665 | NA |
| ASV_16s_8814 | 0.454544178 | -0.773452832 | 3.549417283 | 1.621340397 | NA          | NA |
| ASV_16s_8815 | 0.502527426 | -0.767295348 | 3.549413757 | 1.729461051 | 0.973288191 | NA |
| ASV_16s_8816 | 0.466915538 | 1.28543766   | 3.548045465 | 0.831815911 | NA          | NA |
| ASV_16s_8817 | 0.435799873 | -0.977406127 | 3.549323177 | 1.284668014 | NA          | NA |
| ASV_16s_8818 | 0.484450358 | -0.600948628 | 3.550435009 | 0.860885325 | NA          | NA |
| ASV_16s_8819 | 0.431557562 | -1.109566888 | 3.548327681 | 1.178209107 | NA          | NA |
| ASV_16s_8820 | 0.478352826 | -0.116062376 | 3.550283291 | 1.311028728 | NA          | NA |
| ASV_16s_8821 | 0.589218893 | -0.450784259 | 3.54868254  | 1.389448184 | 0.985892266 | NA |

|              |             |              |             |             |             |    |
|--------------|-------------|--------------|-------------|-------------|-------------|----|
| ASV_16s_8822 | 0.45267511  | -0.488600046 | 3.550267629 | 1.535988817 | 0.981037508 | NA |
| ASV_16s_8823 | 0.619848179 | 0.727069072  | 3.550700698 | 1.708480792 | 0.974203424 | NA |
| ASV_16s_8824 | 0.483425672 | -0.376797985 | 3.550355535 | 1.273367871 | 0.989138372 | NA |
| ASV_16s_8825 | 0.431986419 | -1.713575456 | 3.548642018 | 0.527411443 | NA          | NA |
| ASV_16s_8826 | 0.504909216 | -1.983986886 | 3.548028225 | 0.409856602 | NA          | NA |
| ASV_16s_8827 | 0.487240256 | 0.255493558  | 3.549103366 | 1.355869548 | 0.98688476  | NA |
| ASV_16s_8828 | 0.533847604 | 1.209139418  | 3.54991755  | 1.427257946 | 0.984721713 | NA |
| ASV_16s_8829 | 0.348284702 | -0.165921858 | 3.550162136 | 0.023130275 | NA          | NA |
| ASV_16s_8830 | 0.489678899 | 0.666551494  | 3.549854346 | 1.783005507 | NA          | NA |
| ASV_16s_8831 | 0.61921657  | 0.414158378  | 3.551016982 | 0.612614719 | NA          | NA |
| ASV_16s_8832 | 0.363266518 | 0.418913041  | 3.550301788 | 0.801125758 | NA          | NA |
| ASV_16s_8833 | 0.136853698 | 0.36426108   | 3.551524421 | 0.482297369 | NA          | NA |
| ASV_16s_8834 | 0.291519076 | -0.191247807 | 3.550518667 | 0.962686841 | 0.995408202 | NA |
| ASV_16s_8835 | 0.261834262 | 0.220015714  | 3.550687141 | 0.912485506 | 0.996119501 | NA |
| ASV_16s_8836 | 0.265368818 | 0.220014596  | 3.550685667 | 0.919257825 | 0.996028034 | NA |
| ASV_16s_8837 | 0.294281594 | 0.596222258  | 3.550643316 | 0.902328606 | NA          | NA |
| ASV_16s_8838 | 0.384383298 | -0.068568579 | 3.550527479 | 1.477634297 | 0.983073873 | NA |
| ASV_16s_8839 | 0.349239853 | -0.570511067 | 3.550177138 | 1.286667612 | 0.98879263  | NA |
| ASV_16s_8840 | 0.415567123 | 1.924699687  | 3.54998416  | 0.809948906 | NA          | NA |
| ASV_16s_8841 | 0.314900919 | -0.306144462 | 3.550690284 | 0.587199049 | 0.999060441 | NA |
| ASV_16s_8842 | 0.397049229 | -0.06915336  | 3.549809967 | 1.852541489 | NA          | NA |
| ASV_16s_8843 | 0.362146363 | 0.292817765  | 3.551046412 | 0.900487587 | NA          | NA |
| ASV_16s_8844 | 0.121478249 | -0.397148449 | 3.551469967 | 0.512738887 | NA          | NA |
| ASV_16s_8845 | 0.372925869 | 1.181795118  | 3.550483772 | 0.830055176 | NA          | NA |
| ASV_16s_8846 | 0.411309228 | -0.276924875 | 3.548938929 | 1.346194511 | NA          | NA |
| ASV_16s_8847 | 0.464804641 | 0.332214559  | 3.550745695 | 1.191720228 | 0.99111629  | NA |
| ASV_16s_8848 | 0.497430359 | 0.320423607  | 3.550739323 | 1.287858652 | 0.988761341 | NA |
| ASV_16s_8849 | 0.471968924 | 0.315939293  | 3.550739498 | 1.375203306 | 0.986318685 | NA |
| ASV_16s_8850 | 0.440062645 | 0.315939428  | 3.550750513 | 1.339659085 | NA          | NA |
| ASV_16s_8851 | 0.56319137  | 0.693727078  | 3.55068412  | 1.399543845 | 0.985585232 | NA |
| ASV_16s_8852 | 0.465077528 | 0.693633653  | 3.550711874 | 1.302324727 | 0.988377018 | NA |
| ASV_16s_8853 | 0.375576164 | -0.188692953 | 3.549822995 | 1.743965122 | NA          | NA |
| ASV_16s_8854 | 0.385756091 | -0.266021119 | 3.549774018 | 1.753897939 | 0.972199048 | NA |
| ASV_16s_8855 | 0.403847516 | -0.294510922 | 3.549726659 | 1.779185032 | 0.971045785 | NA |
| ASV_16s_8856 | 0.399449172 | -0.299047055 | 3.549735607 | 1.765427106 | 0.97167655  | NA |
| ASV_16s_8857 | 0.432690441 | -0.342264292 | 3.549662319 | 1.79868657  | 0.970138148 | NA |
| ASV_16s_8858 | 0.388362392 | -0.37229498  | 3.549757741 | 1.662904784 | NA          | NA |
| ASV_16s_8859 | 0.135939049 | 0.099945057  | 3.550737798 | 0.962883866 | 0.995405257 | NA |
| ASV_16s_8860 | 0.106217532 | -0.169548559 | 3.550756705 | 0.510644398 | NA          | NA |
| ASV_16s_8862 | 0.394714209 | 0.091214358  | 3.549739227 | 1.766954068 | 0.971606932 | NA |
| ASV_16s_8863 | 0.42049747  | -0.060638791 | 3.549639021 | 1.761624439 | 0.971849498 | NA |
| ASV_16s_8864 | 0.389823924 | 0.112775982  | 3.549687264 | 1.618164902 | 0.977934667 | NA |
| ASV_16s_8865 | 0.415268378 | 0.400420347  | 3.549481636 | 1.941307383 | NA          | NA |
| ASV_16s_8866 | 0.394550041 | 0.384603871  | 3.54945427  | 1.603109077 | 0.97852388  | NA |
| ASV_16s_8867 | 0.436431851 | -0.29362152  | 3.549031336 | 1.279328277 | 0.98898425  | NA |
| ASV_16s_8868 | 0.409398068 | 0.152226228  | 3.549582966 | 1.973296651 | 0.961303526 | NA |
| ASV_16s_8869 | 0.389434032 | -0.339326823 | 3.549235983 | 1.135199522 | NA          | NA |
| ASV_16s_8870 | 0.47202832  | -0.79229148  | 3.549095064 | 1.404416401 | NA          | NA |
| ASV_16s_8871 | 0.387594114 | 0.316649891  | 3.549146259 | 1.910119031 | NA          | NA |
| ASV_16s_8872 | 0.491528129 | -0.79200736  | 3.54903138  | 1.55346444  | 0.980400788 | NA |
| ASV_16s_8873 | 0.511962767 | -0.817482454 | 3.549470627 | 1.114765746 | 0.992758875 | NA |
| ASV_16s_8874 | 0.459098436 | -0.729005117 | 3.54928777  | 1.567907867 | NA          | NA |
| ASV_16s_8875 | 0.461702879 | -0.79153961  | 3.549154374 | 1.521427785 | NA          | NA |
| ASV_16s_8876 | 0.424034404 | -0.092797349 | 3.549285748 | 2.060556137 | 0.956412756 | NA |
| ASV_16s_8877 | 0.459581671 | -0.541740894 | 3.54940644  | 1.584552115 | 0.979237285 | NA |
| ASV_16s_8878 | 0.39627562  | 0.669507777  | 3.548658367 | 0.941815368 | NA          | NA |
| ASV_16s_8879 | 0.47802216  | -0.44166727  | 3.549024577 | 1.225468041 | 0.990328631 | NA |
| ASV_16s_8880 | 0.445799579 | -0.55502166  | 3.550087119 | 1.587679707 | 0.979118039 | NA |
| ASV_16s_8881 | 0.425262314 | -0.208097376 | 3.548864501 | 1.283029144 | NA          | NA |
| ASV_16s_8882 | 0.507899279 | -0.64506562  | 3.549843606 | 0.42463568  | 0.999678336 | NA |
| ASV_16s_8883 | 0.658325875 | 0.305694527  | 3.548496759 | 1.451959509 | NA          | NA |
| ASV_16s_8884 | 0.47764243  | 0.983590867  | 3.549390934 | 0.826717361 | 0.997161637 | NA |
| ASV_16s_8885 | 0.416102716 | 1.33768256   | 3.550183072 | 0.888694454 | NA          | NA |
| ASV_16s_8886 | 0.481710486 | 2.162048391  | 3.549550753 | 0.561762424 | 0.999187441 | NA |
| ASV_16s_8887 | 0.407272778 | 0.403307161  | 3.550443386 | 0.907190136 | NA          | NA |
| ASV_16s_8888 | 0.473838969 | 0.286181701  | 3.548466388 | 1.728266362 | 0.973340799 | NA |
| ASV_16s_8889 | 0.315612077 | 0.400100392  | 3.550852404 | 0.824564637 | NA          | NA |

|              |             |              |             |             |             |    |
|--------------|-------------|--------------|-------------|-------------|-------------|----|
| ASV_16s_8890 | 0.31324562  | 0.217119492  | 3.549895007 | 1.385323265 | NA          | NA |
| ASV_16s_8891 | 0.285610978 | 0.224105151  | 3.550734791 | 0.679817867 | 0.998486046 | NA |
| ASV_16s_8892 | 0.478966841 | -0.954668784 | 3.548871672 | 1.119308481 | NA          | NA |
| ASV_16s_8893 | 0.243902186 | 1.284209717  | 3.55061216  | 0.647572319 | NA          | NA |
| ASV_16s_8894 | 0.435330788 | 0.419009233  | 3.5500732   | 0.859295074 | NA          | NA |
| ASV_16s_8895 | 0.277709183 | -0.083903246 | 3.549835668 | 1.384708362 | NA          | NA |
| ASV_16s_8896 | 0.251725531 | -0.547304571 | 3.550001961 | 0.676921272 | 0.998506847 | NA |
| ASV_16s_8897 | 0.218452617 | -0.544058213 | 3.550195319 | 0.6319253   | NA          | NA |
| ASV_16s_8898 | 0.425573508 | -0.079202817 | 3.550642977 | 1.318175311 | 0.987946754 | NA |
| ASV_16s_8899 | 0.262724423 | 0.220015451  | 3.550686767 | 0.914187404 | 0.996096645 | NA |
| ASV_16s_8900 | 0.276354138 | 0.220011423  | 3.550681329 | 0.93974514  | NA          | NA |
| ASV_16s_8901 | 0.276354138 | 0.220011423  | 3.550681329 | 0.93974514  | NA          | NA |
| ASV_16s_8902 | 0.385594152 | -0.39541393  | 3.550754814 | 0.43308179  | 0.999656501 | NA |
| ASV_16s_8903 | 0.262397877 | 0.534143274  | 3.550588585 | 1.104081496 | 0.992970419 | NA |
| ASV_16s_8904 | 0.49541009  | -0.580548574 | 3.549998251 | 1.06682713  | 0.993677305 | NA |
| ASV_16s_8905 | 0.391032248 | -0.069183446 | 3.549837874 | 1.834952699 | NA          | NA |
| ASV_16s_8906 | 0.393014321 | -0.069138217 | 3.549815689 | 1.842384364 | NA          | NA |
| ASV_16s_8907 | 0.39350984  | -0.06912503  | 3.549811923 | 1.84321017  | NA          | NA |
| ASV_16s_8908 | 0.357913452 | 0.347672488  | 3.549518549 | 1.372049334 | NA          | NA |
| ASV_16s_8909 | 0.341453615 | 1.778166095  | 3.550335836 | 0.560847893 | NA          | NA |
| ASV_16s_8910 | 0.603414142 | 0.30682899   | 3.550749814 | 3.167958807 | 0.869042054 | NA |
| ASV_16s_8911 | 0.498250924 | 0.36604623   | 3.550287851 | 1.656323978 | 0.976399411 | NA |
| ASV_16s_8912 | 0.185841965 | 0.279403856  | 3.551576606 | 0.663030802 | NA          | NA |
| ASV_16s_8913 | 0.580442961 | -0.525275924 | 3.549077888 | 2.577400885 | 0.921156811 | NA |
| ASV_16s_8914 | 0.493053372 | -0.549936211 | 3.549360946 | 0.892300997 | NA          | NA |
| ASV_16s_8915 | 0.41014724  | -0.104475281 | 3.549918066 | 1.454984076 | 0.98382732  | NA |
| ASV_16s_8916 | 0.684030365 | 0.864691124  | 3.549824114 | 2.194793599 | 0.948276858 | NA |
| ASV_16s_8917 | 0.534460952 | 0.353652433  | 3.550016569 | 1.8148289   | 0.969374835 | NA |
| ASV_16s_8918 | 0.557364364 | 0.238385095  | 3.550178185 | 2.622257256 | 0.917613139 | NA |
| ASV_16s_8919 | 0.46315364  | -0.060690609 | 3.549790568 | 1.974295514 | NA          | NA |
| ASV_16s_8920 | 0.469573504 | 0.343020989  | 3.549705471 | 1.929260659 | NA          | NA |
| ASV_16s_8921 | 0.508332905 | 0.344081488  | 3.549845315 | 1.849095624 | NA          | NA |
| ASV_16s_8922 | 0.565314747 | 0.363347376  | 3.550204384 | 1.107360428 | 0.992905918 | NA |
| ASV_16s_8923 | 0.439703996 | 0.33912416   | 3.550733945 | 1.095535687 | NA          | NA |
| ASV_16s_8924 | 0.555138278 | 0.684249041  | 3.550761862 | 2.011349084 | NA          | NA |
| ASV_16s_8925 | 0.467452898 | 0.315939316  | 3.550740967 | 1.370305163 | 0.986463477 | NA |
| ASV_16s_8926 | 0.524104854 | 0.315939316  | 3.550724385 | 1.428377904 | 0.984686178 | NA |
| ASV_16s_8927 | 0.435330788 | 0.31593944   | 3.550752285 | 1.334157329 | NA          | NA |
| ASV_16s_8928 | 0.372268338 | 1.180991019  | 3.550310379 | 0.911306262 | NA          | NA |
| ASV_16s_8929 | 0.533312956 | 0.693703239  | 3.550691495 | 1.371828519 | 0.986418546 | NA |
| ASV_16s_8930 | 0.516291303 | 0.693685984  | 3.550696075 | 1.355355576 | 0.98689961  | NA |
| ASV_16s_8931 | 0.391250776 | -0.188744121 | 3.549784302 | 1.782670385 | 0.970884736 | NA |
| ASV_16s_8932 | 0.395858649 | -0.214882465 | 3.549763381 | 1.794216939 | 0.970347576 | NA |
| ASV_16s_8933 | 0.381670766 | -0.26283276  | 3.549784516 | 1.745410112 | 0.972580169 | NA |
| ASV_16s_8934 | 0.395935544 | -0.28130851  | 3.549746983 | 1.769634921 | 0.971484471 | NA |
| ASV_16s_8935 | 0.410210881 | -0.344387998 | 3.549707795 | 1.746759396 | 0.972519784 | NA |
| ASV_16s_8936 | 0.397882159 | -0.336898649 | 3.549735205 | 1.726823393 | 0.973404262 | NA |
| ASV_16s_8937 | 0.371599215 | -0.336381957 | 3.549798954 | 1.66475558  | NA          | NA |
| ASV_16s_8938 | 0.403489384 | -0.441815917 | 3.549734108 | 1.577540147 | 0.979503174 | NA |
| ASV_16s_8939 | 0.371656256 | -0.426819813 | 3.549808779 | 1.53420671  | NA          | NA |
| ASV_16s_8940 | 0.379252699 | -0.430586915 | 3.549789851 | 1.545001917 | 0.980710672 | NA |
| ASV_16s_8941 | 0.377733411 | -0.42984344  | 3.549793578 | 1.542866049 | NA          | NA |
| ASV_16s_8943 | 0.3828594   | -0.337442281 | 3.549823568 | 1.620983226 | 0.977823333 | NA |
| ASV_16s_8944 | 0.396534919 | -0.395664877 | 3.549513663 | 0.97562508  | NA          | NA |
| ASV_16s_8945 | 0.449643214 | 0.164805868  | 3.549374381 | 1.948455832 | NA          | NA |
| ASV_16s_8946 | 0.394085384 | -0.008806829 | 3.549399924 | 1.699612584 | NA          | NA |
| ASV_16s_8947 | 0.436527335 | -0.644403847 | 3.549460714 | 1.560349661 | 0.980146506 | NA |
| ASV_16s_8948 | 0.495172825 | -0.792668786 | 3.549019036 | 1.421804143 | 0.984894045 | NA |
| ASV_16s_8949 | 0.318811212 | 1.333219167  | 3.550070923 | 0.520331711 | NA          | NA |
| ASV_16s_8950 | 0.540616532 | -0.792374071 | 3.548862861 | 1.54740026  | 0.980623145 | NA |
| ASV_16s_8951 | 0.466789602 | -0.791874557 | 3.549110984 | 1.494384355 | 0.982503436 | NA |
| ASV_16s_8952 | 0.429059554 | -0.189833337 | 3.549781672 | 1.281937486 | NA          | NA |
| ASV_16s_8953 | 0.475096253 | -0.791361695 | 3.549152634 | 1.583341987 | 0.979283316 | NA |
| ASV_16s_8954 | 0.40817398  | -0.196689966 | 3.550034401 | 1.271319088 | 0.989191039 | NA |
| ASV_16s_8955 | 0.458234745 | -0.745371687 | 3.549564105 | 1.654426909 | 0.976477158 | NA |
| ASV_16s_8956 | 0.442500549 | 0.124121406  | 3.549562776 | 1.904893268 | 0.964916139 | NA |
| ASV_16s_8957 | 0.359471855 | -0.927657463 | 3.548968105 | 1.302284599 | 0.988378095 | NA |

|              |             |              |             |             |             |    |
|--------------|-------------|--------------|-------------|-------------|-------------|----|
| ASV_16s_8958 | 0.458092388 | -0.098170778 | 3.550504836 | 1.53457944  | 0.981088316 | NA |
| ASV_16s_8959 | 0.545384108 | -1.348776141 | 3.548777537 | 1.477982729 | NA          | NA |
| ASV_16s_8960 | 0.20658799  | 1.220832015  | 3.550805593 | 0.468525785 | NA          | NA |
| ASV_16s_8961 | 0.465230486 | 2.162069343  | 3.549172159 | 0.771314435 | NA          | NA |
| ASV_16s_8962 | 0.645233817 | 0.271537111  | 3.549834324 | 1.052516065 | NA          | NA |
| ASV_16s_8963 | 0.610869593 | 0.271545561  | 3.549886215 | 1.034887107 | NA          | NA |
| ASV_16s_8964 | 0.242767066 | 0.35327652   | 3.551931123 | 0.427136651 | NA          | NA |
| ASV_16s_8965 | 0.70658639  | 0.403532932  | 3.549797561 | 1.084661164 | NA          | NA |
| ASV_16s_8966 | 0.393698665 | 1.384957124  | 3.54853142  | 1.355609523 | NA          | NA |
| ASV_16s_8967 | 0.443240003 | -1.62620742  | 3.54891325  | 0.497246262 | NA          | NA |
| ASV_16s_8968 | 0.133910608 | 0.362819815  | 3.551539931 | 0.475426991 | NA          | NA |
| ASV_16s_8969 | 0.133910608 | 0.362819815  | 3.551539931 | 0.475426991 | NA          | NA |
| ASV_16s_8970 | 0.367176607 | -0.079135375 | 3.550663408 | 1.243297157 | NA          | NA |
| ASV_16s_8971 | 0.256994903 | 0.220017292  | 3.550689225 | 0.903046086 | 0.996244695 | NA |
| ASV_16s_8972 | 0.273350289 | 0.220012231  | 3.550682482 | 0.934209303 | NA          | NA |
| ASV_16s_8973 | 0.272804428 | 0.220012392  | 3.550682694 | 0.933199167 | NA          | NA |
| ASV_16s_8974 | 0.287952958 | 0.596217131  | 3.550645368 | 0.891344919 | NA          | NA |
| ASV_16s_8975 | 0.585154149 | -1.918065574 | 3.548098678 | 0.510994065 | NA          | NA |
| ASV_16s_8976 | 0.494104646 | 1.370389552  | 3.549225143 | 1.271622043 | 0.989183261 | NA |
| ASV_16s_8977 | 0.473697433 | 0.428915915  | 3.549247584 | 1.502555681 | NA          | NA |
| ASV_16s_8978 | 0.604333255 | 2.439788191  | 3.096649087 | 0.595249118 | 0.999017623 | NA |
| ASV_16s_8979 | 0.394430115 | -0.068865908 | 3.549821425 | 1.815956943 | NA          | NA |
| ASV_16s_8980 | 0.342506117 | 0.691003152  | 3.550111739 | 1.542865871 | NA          | NA |
| ASV_16s_8981 | 0.303533221 | 0.662287057  | 3.551123034 | 1.11191711  | NA          | NA |
| ASV_16s_8982 | 0.487694096 | -0.54989859  | 3.549368346 | 0.888776139 | NA          | NA |
| ASV_16s_8983 | 0.384761979 | -0.127944208 | 3.54988523  | 1.733737953 | 0.973099368 | NA |
| ASV_16s_8984 | 0.437730499 | -0.102388495 | 3.550277791 | 1.585744254 | 0.979191879 | NA |
| ASV_16s_8985 | 0.461183938 | 0.217301502  | 3.548525094 | 1.265394847 | NA          | NA |
| ASV_16s_8986 | 0.456641342 | 0.35413409   | 3.550542879 | 1.049398791 | 0.993991823 | NA |
| ASV_16s_8987 | 0.485444658 | 0.31593933   | 3.550735286 | 1.389449999 | 0.985892211 | NA |
| ASV_16s_8988 | 0.458517848 | 0.315939337  | 3.550743958 | 1.360492367 | 0.986750732 | NA |
| ASV_16s_8989 | 0.549106496 | 1.183929123  | 3.55003995  | 1.060611524 | 0.993790646 | NA |
| ASV_16s_8990 | 0.569629475 | 0.734958462  | 3.550764742 | 1.446042271 | NA          | NA |
| ASV_16s_8991 | 0.57193519  | 1.186187031  | 3.549898455 | 1.064010734 | 0.993728824 | NA |
| ASV_16s_8992 | 0.499498947 | 0.693671919  | 3.550700902 | 1.33854718  | 0.987379609 | NA |
| ASV_16s_8993 | 0.373471259 | -0.171130255 | 3.549837017 | 1.735129752 | NA          | NA |
| ASV_16s_8994 | 0.373494075 | -0.202031397 | 3.549822709 | 1.739533889 | NA          | NA |
| ASV_16s_8995 | 0.375019068 | -0.211165986 | 3.549815277 | 1.743133271 | NA          | NA |
| ASV_16s_8996 | 0.367439737 | -0.227567175 | 3.549829516 | 1.721613646 | NA          | NA |
| ASV_16s_8997 | 0.367439737 | -0.227567175 | 3.549829516 | 1.721613646 | NA          | NA |
| ASV_16s_8998 | 0.389930068 | -0.2845557   | 3.549760185 | 1.753077502 | NA          | NA |
| ASV_16s_8999 | 0.417831106 | -0.326102565 | 3.549692884 | 1.783382022 | 0.970851791 | NA |
| ASV_16s_9000 | 0.387799139 | -0.314415362 | 3.549760395 | 1.724854099 | 0.973490733 | NA |
| ASV_16s_9001 | 0.407756965 | -0.327446324 | 3.549713966 | 1.759248408 | 0.971957256 | NA |
| ASV_16s_9002 | 0.419322227 | -0.349676227 | 3.549688639 | 1.760889627 | 0.971882849 | NA |
| ASV_16s_9003 | 0.376376407 | -0.339532874 | 3.54978662  | 1.673099523 | 0.975705417 | NA |
| ASV_16s_9004 | 0.375528966 | -0.681592445 | 3.549921205 | 0.897811815 | NA          | NA |
| ASV_16s_9005 | 0.06536521  | -0.266995894 | 3.551724706 | 0.321706005 | 0.999873322 | NA |
| ASV_16s_9006 | 0.142575544 | 0.231791765  | 3.550719888 | 1.251219399 | 0.989699375 | NA |
| ASV_16s_9007 | 0.237995575 | 0.220024202  | 3.550698221 | 0.864376112 | NA          | NA |
| ASV_16s_9008 | 0.163304148 | 0.220066525  | 3.550753806 | 0.678870417 | NA          | NA |
| ASV_16s_9009 | 0.378842606 | -0.113132723 | 3.549771122 | 1.685353743 | 0.975191091 | NA |
| ASV_16s_9010 | 0.385738391 | 0.091924358  | 3.549806496 | 1.710395972 | 0.974120637 | NA |
| ASV_16s_9011 | 0.396585299 | -0.018866645 | 3.549702263 | 1.73872672  | 0.972878153 | NA |
| ASV_16s_9012 | 0.38864268  | 0.234473789  | 3.549389017 | 1.821953312 | NA          | NA |
| ASV_16s_9013 | 0.415714473 | 0.203820345  | 3.548968338 | 2.057163896 | 0.956608774 | NA |
| ASV_16s_9014 | 0.51665533  | -0.576711008 | 3.549162764 | 1.657561279 | NA          | NA |
| ASV_16s_9015 | 0.419584346 | 0.570358888  | 3.549093537 | 1.793004164 | NA          | NA |
| ASV_16s_9016 | 0.556984011 | 2.183106358  | 3.548743795 | 0.483142428 | 0.999505896 | NA |
| ASV_16s_9017 | 0.481466544 | -0.792272052 | 3.549049471 | 1.470853274 | 0.983301598 | NA |
| ASV_16s_9018 | 0.44955626  | -0.782467595 | 3.54939604  | 1.263829634 | NA          | NA |
| ASV_16s_9019 | 0.386936542 | -1.027519976 | 3.549436574 | 0.949477879 | 0.995602882 | NA |
| ASV_16s_9020 | 0.375166116 | -0.536394351 | 3.549451255 | 1.28911754  | NA          | NA |
| ASV_16s_9021 | 0.470314407 | -0.790925573 | 3.549227925 | 1.602719865 | 0.978538988 | NA |
| ASV_16s_9022 | 0.462451702 | -0.787098732 | 3.54972896  | 1.180907062 | 0.991359884 | NA |
| ASV_16s_9023 | 0.54244144  | -0.87924516  | 3.549483898 | 1.251756774 | 0.989685981 | NA |
| ASV_16s_9024 | 0.476089209 | -0.766031682 | 3.549442788 | 1.678074782 | 0.97549735  | NA |

|              |             |              |             |             |             |    |
|--------------|-------------|--------------|-------------|-------------|-------------|----|
| ASV_16s_9025 | 0.46705748  | -0.822149751 | 3.549336262 | 1.33600581  | 0.987451232 | NA |
| ASV_16s_9026 | 0.517726268 | -0.825567896 | 3.549157418 | 1.399662237 | 0.985581608 | NA |
| ASV_16s_9027 | 0.46464113  | -0.569129518 | 3.550234675 | 1.214236079 | 0.990595413 | NA |
| ASV_16s_9028 | 0.477035864 | 0.619254673  | 3.550855803 | 0.848466732 | 0.996917301 | NA |
| ASV_16s_9029 | 0.418325412 | 1.578532603  | 3.549468591 | 0.543052897 | NA          | NA |
| ASV_16s_9030 | 0.409445822 | -0.158531485 | 3.549243343 | 1.268781082 | 0.989256063 | NA |
| ASV_16s_9031 | 0.311500272 | 0.109784742  | 3.332030507 | 0.954518342 | 0.995529235 | NA |
| ASV_16s_9032 | 0.492853858 | -0.626061563 | 3.549573341 | 0.96317118  | NA          | NA |
| ASV_16s_9033 | 0.489185462 | 0.371637651  | 3.551648652 | 0.547798694 | NA          | NA |
| ASV_16s_9034 | 0.390720664 | 1.490417226  | 3.549902035 | 1.089032466 | NA          | NA |
| ASV_16s_9035 | 0.510005272 | 0.378211225  | 3.551614346 | 0.564772287 | NA          | NA |
| ASV_16s_9036 | 0.351548244 | 0.418893751  | 3.550347805 | 0.790562574 | NA          | NA |
| ASV_16s_9037 | 0.188561326 | 1.223186731  | 3.550837024 | 0.558793402 | NA          | NA |
| ASV_16s_9038 | 0.436505504 | 0.31093059   | 3.550738008 | 1.312643404 | 0.988098009 | NA |
| ASV_16s_9039 | 0.455167162 | 0.295041535  | 3.550727866 | 1.478021365 | 0.983060819 | NA |
| ASV_16s_9040 | 0.400992475 | 0.295989056  | 3.549631966 | 2.016020383 | 0.958948353 | NA |
| ASV_16s_9041 | 0.456701674 | -0.073432249 | 3.550546164 | 1.403317243 | NA          | NA |
| ASV_16s_9042 | 0.354828436 | -0.107390919 | 3.550985646 | 0.937518361 | 0.99577448  | NA |
| ASV_16s_9043 | 0.414184118 | -0.068930551 | 3.549788197 | 1.861919032 | NA          | NA |
| ASV_16s_9044 | 0.350930544 | 0.289162267  | 3.551762379 | 0.553163246 | 0.999227599 | NA |
| ASV_16s_9045 | 0.422480475 | -0.065128665 | 3.550143046 | 1.468393244 | 0.983383755 | NA |
| ASV_16s_9046 | 0.46935104  | 0.313946858  | 3.550522312 | 1.050015119 | 0.993980875 | NA |
| ASV_16s_9047 | 0.220752051 | 0.279644241  | 3.551496861 | 0.725306366 | NA          | NA |
| ASV_16s_9048 | 0.181801922 | 0.279373465  | 3.551587318 | 0.655152281 | NA          | NA |
| ASV_16s_9049 | 0.478414608 | 1.301722059  | 3.549784805 | 1.6898053   | NA          | NA |
| ASV_16s_9050 | 0.493977888 | 1.009871308  | 3.550323319 | 1.490954003 | 0.98262118  | NA |
| ASV_16s_9051 | 0.507463641 | -0.109099565 | 3.549393195 | 1.443053933 | 0.984215918 | NA |
| ASV_16s_9052 | 0.6936587   | 0.21425043   | 3.550655381 | 2.815749541 | 0.901507688 | NA |
| ASV_16s_9053 | 0.528180365 | 0.365540428  | 3.550218475 | 1.696833994 | 0.974703592 | NA |
| ASV_16s_9054 | 0.335550592 | -0.074063842 | 3.550693246 | 1.221869938 | NA          | NA |
| ASV_16s_9055 | 0.479836097 | 0.343488246  | 3.549758854 | 1.884443272 | NA          | NA |
| ASV_16s_9056 | 0.44627538  | 0.363433003  | 3.550272233 | 1.013999335 | NA          | NA |
| ASV_16s_9057 | 0.468163719 | 0.36083747   | 3.550449688 | 1.046539492 | 0.994042451 | NA |
| ASV_16s_9058 | 0.407738349 | 0.360398742  | 3.550843213 | 1.339885619 | NA          | NA |
| ASV_16s_9059 | 0.407738349 | 0.360398742  | 3.550843213 | 1.339885619 | NA          | NA |
| ASV_16s_9060 | 0.438870509 | 0.315939359  | 3.550750959 | 1.338242782 | 0.987388201 | NA |
| ASV_16s_9061 | 0.59862313  | 1.186286677  | 3.549875239 | 1.079899287 | 0.993434667 | NA |
| ASV_16s_9062 | 0.56336981  | 0.734951264  | 3.550766842 | 1.440414101 | NA          | NA |
| ASV_16s_9063 | 0.485073246 | 0.693654934  | 3.550705315 | 1.323640419 | 0.987796174 | NA |
| ASV_16s_9064 | 0.538612554 | 0.69370935   | 3.550690129 | 1.376840036 | NA          | NA |
| ASV_16s_9065 | 0.425867076 | 0.693583599  | 3.550726535 | 1.257598992 | NA          | NA |
| ASV_16s_9066 | 0.379187005 | -0.176968029 | 3.54981938  | 1.750805735 | 0.972338242 | NA |
| ASV_16s_9067 | 0.363320187 | -0.176193696 | 3.549861726 | 1.710334169 | NA          | NA |
| ASV_16s_9068 | 0.394894835 | -0.33501953  | 3.549742135 | 1.721822813 | NA          | NA |
| ASV_16s_9069 | 0.436825564 | -0.359305791 | 3.549654165 | 1.78675763  | 0.970695229 | NA |
| ASV_16s_9070 | 0.392237622 | -0.37448372  | 3.549748771 | 1.668800442 | 0.975884379 | NA |
| ASV_16s_9071 | 0.36905633  | -0.425493847 | 3.549815472 | 1.530403334 | NA          | NA |
| ASV_16s_9072 | 0.129798988 | -0.50079521  | 3.55119035  | 0.545439074 | NA          | NA |
| ASV_16s_9073 | 0.363593982 | -0.681437287 | 3.549959871 | 0.887420851 | NA          | NA |
| ASV_16s_9074 | 0.122146835 | 0.220111733  | 3.550813363 | 0.544882729 | NA          | NA |
| ASV_16s_9075 | 0.386646819 | -0.071247367 | 3.549724857 | 1.6459173   | 0.976824072 | NA |
| ASV_16s_9076 | 0.383886936 | -0.060694315 | 3.549752147 | 1.572053187 | 0.979709831 | NA |
| ASV_16s_9077 | 0.39114872  | 0.038329328  | 3.54956659  | 1.736191528 | 0.9729907   | NA |
| ASV_16s_9078 | 0.394943021 | -0.26530354  | 3.549467073 | 1.281538659 | NA          | NA |
| ASV_16s_9079 | 0.400202258 | 0.113657376  | 3.54938705  | 1.834862672 | 0.968412366 | NA |
| ASV_16s_9080 | 0.411432129 | -0.078554737 | 3.549602526 | 0.997782958 | 0.994864221 | NA |
| ASV_16s_9081 | 0.377645028 | 0.303712467  | 3.549554431 | 1.802825127 | NA          | NA |
| ASV_16s_9082 | 0.417011926 | -0.440649199 | 3.549498802 | 0.780777117 | NA          | NA |
| ASV_16s_9083 | 0.466658809 | -0.792308349 | 3.549132189 | 1.356410849 | NA          | NA |
| ASV_16s_9084 | 0.448542597 | 0.636278901  | 3.548801304 | 1.91482311  | 0.964403816 | NA |
| ASV_16s_9085 | 0.490563817 | -0.792243758 | 3.549022428 | 1.524112407 | NA          | NA |
| ASV_16s_9086 | 0.422748426 | 1.234893557  | 3.548871242 | 1.488135981 | 0.982717551 | NA |
| ASV_16s_9087 | 0.483559698 | -0.791691237 | 3.549092089 | 1.576692288 | NA          | NA |
| ASV_16s_9088 | 0.475235806 | -0.79149723  | 3.549132196 | 1.570116029 | 0.979782496 | NA |
| ASV_16s_9089 | 0.461128092 | -0.781919553 | 3.549352478 | 1.620659754 | 0.977836128 | NA |
| ASV_16s_9090 | 0.4589899   | 0.211143706  | 3.54988647  | 1.856392809 | 0.967359307 | NA |
| ASV_16s_9091 | 0.442174775 | 0.858725067  | 3.550487572 | 1.364603074 | NA          | NA |

|              |             |              |             |             |             |    |
|--------------|-------------|--------------|-------------|-------------|-------------|----|
| ASV_16s_9092 | 0.444711917 | -0.587027859 | 3.550005951 | 1.611470869 | 0.978197792 | NA |
| ASV_16s_9093 | 0.427884283 | -0.960101219 | 3.549402618 | 1.465457569 | NA          | NA |
| ASV_16s_9094 | 0.310753661 | -0.492373033 | 3.550214554 | 0.818425012 | 0.997251342 | NA |
| ASV_16s_9095 | 0.539027893 | 1.10981667   | 3.549631202 | 1.596177324 | NA          | NA |
| ASV_16s_9096 | 0.40275311  | 0.522368934  | 3.550229234 | 1.243699665 | NA          | NA |
| ASV_16s_9097 | 0.258162597 | 1.554523806  | 3.550591964 | 0.514272067 | NA          | NA |
| ASV_16s_9098 | 0.526366264 | 1.338926814  | 3.549894307 | 0.964361989 | NA          | NA |
| ASV_16s_9099 | 0.418824154 | -0.21333431  | 3.5502174   | 1.107043545 | NA          | NA |
| ASV_16s_9100 | 0.438950884 | -0.565654966 | 3.549604558 | 0.925519235 | NA          | NA |
| ASV_16s_9101 | 0.130967517 | 0.361471131  | 3.551555166 | 0.468474776 | NA          | NA |
| ASV_16s_9102 | 0.17198132  | -0.070878967 | 3.550966285 | 0.758614545 | NA          | NA |
| ASV_16s_9103 | 0.211329162 | -0.542936395 | 3.550243931 | 0.621413211 | NA          | NA |
| ASV_16s_9104 | 0.259674086 | 0.220016384  | 3.550688065 | 0.908254871 | 0.996175941 | NA |
| ASV_16s_9105 | 0.26734259  | 0.22001407   | 3.550684865 | 0.922955277 | NA          | NA |
| ASV_16s_9106 | 0.377936488 | -0.069167967 | 3.549868257 | 1.800282709 | NA          | NA |
| ASV_16s_9107 | 0.384378226 | -0.068943457 | 3.549829288 | 1.803248957 | NA          | NA |
| ASV_16s_9108 | 0.410393724 | -0.12500653  | 3.548922625 | 1.426997794 | NA          | NA |
| ASV_16s_9109 | 0.260349059 | 0.396393687  | 3.550834879 | 0.489425018 | NA          | NA |
| ASV_16s_9110 | 0.51498394  | 0.762014272  | 3.550845524 | 1.443539489 | 0.984200213 | NA |
| ASV_16s_9111 | 0.305965765 | -0.602331789 | 3.550673568 | 0.820674872 | NA          | NA |
| ASV_16s_9112 | 0.476975544 | -0.549843498 | 3.549383643 | 0.881611893 | NA          | NA |
| ASV_16s_9113 | 0.458835521 | 0.744889776  | 3.550635544 | 1.376433503 | 0.986282173 | NA |
| ASV_16s_9114 | 0.35723034  | -0.554927268 | 3.549857402 | 0.891661143 | NA          | NA |
| ASV_16s_9115 | 0.543356808 | 0.869638012  | 3.549754401 | 1.690741662 | 0.974962979 | NA |
| ASV_16s_9116 | 0.441658849 | 0.337719223  | 3.550740772 | 1.106458946 | 0.992923689 | NA |
| ASV_16s_9117 | 0.486264741 | 0.649066555  | 3.550704876 | 1.76852487  | 0.971535215 | NA |
| ASV_16s_9118 | 0.557110146 | 0.7349439    | 3.550768989 | 1.434723178 | NA          | NA |
| ASV_16s_9119 | 0.275967666 | 0.734265508  | 3.55096505  | 1.078666059 | NA          | NA |
| ASV_16s_9120 | 0.453763327 | 0.693618861  | 3.55071585  | 1.289771287 | 0.988710984 | NA |
| ASV_16s_9121 | 0.453763327 | 0.693618861  | 3.55071585  | 1.289771287 | 0.988710984 | NA |
| ASV_16s_9122 | 0.359006699 | 0.271656032  | 3.550565972 | 0.863716466 | NA          | NA |
| ASV_16s_9123 | 0.367292101 | -0.116525312 | 3.549888014 | 1.693310117 | NA          | NA |
| ASV_16s_9124 | 0.366077364 | -0.186946403 | 3.549848959 | 1.719326409 | NA          | NA |
| ASV_16s_9125 | 0.373499996 | -0.23292599  | 3.549812129 | 1.735732541 | 0.973011047 | NA |
| ASV_16s_9126 | 0.365943935 | -0.358717569 | 3.549813999 | 1.62632675  | 0.977611346 | NA |
| ASV_16s_9127 | 0.364182839 | -0.375613237 | 3.549819933 | 1.601345864 | NA          | NA |
| ASV_16s_9128 | 0.377927038 | -0.41099058  | 3.549788873 | 1.582157043 | NA          | NA |
| ASV_16s_9129 | 0.365742057 | -0.443844772 | 3.549829805 | 1.483027203 | NA          | NA |
| ASV_16s_9130 | 0.128340572 | -0.496949407 | 3.551200413 | 0.541755042 | NA          | NA |
| ASV_16s_9131 | 0.374954758 | -0.681586795 | 3.549923059 | 0.897299654 | NA          | NA |
| ASV_16s_9132 | 0.367864744 | -0.681485062 | 3.549945782 | 0.891161384 | NA          | NA |
| ASV_16s_9133 | 0.101599379 | -0.169503558 | 3.550768056 | 0.491948263 | NA          | NA |
| ASV_16s_9134 | 0.121901466 | -0.169677086 | 3.550724586 | 0.570567749 | NA          | NA |
| ASV_16s_9136 | 0.463110183 | -0.609114118 | 3.549315057 | 1.479366888 | 0.983015392 | NA |
| ASV_16s_9137 | 0.366343727 | 0.105726852  | 3.549258299 | 1.792227095 | NA          | NA |
| ASV_16s_9138 | 0.428227812 | -0.892236712 | 3.549464661 | 1.347168576 | 0.987134774 | NA |
| ASV_16s_9139 | 0.380791216 | 0.11955262   | 3.549058093 | 1.879784009 | NA          | NA |
| ASV_16s_9140 | 0.485537677 | -0.792632489 | 3.549089437 | 1.349922566 | 0.987055958 | NA |
| ASV_16s_9141 | 0.398031755 | -0.338088872 | 3.549084029 | 1.259485589 | NA          | NA |
| ASV_16s_9142 | 0.410855032 | 0.433915491  | 3.550079047 | 1.20721665  | 0.990759786 | NA |
| ASV_16s_9143 | 0.518556032 | -0.433577978 | 3.548293427 | 1.797128018 | 0.97021127  | NA |
| ASV_16s_9144 | 0.511692076 | -0.365371342 | 3.548339076 | 1.721202982 | 0.973650624 | NA |
| ASV_16s_9145 | 0.516839222 | -0.339891945 | 3.548419244 | 0.944074923 | NA          | NA |
| ASV_16s_9146 | 0.4787711   | -0.791031542 | 3.549198176 | 1.618424228 | 0.977924436 | NA |
| ASV_16s_9147 | 0.422060647 | -1.250994623 | 3.549475691 | 0.708075093 | 0.998272919 | NA |
| ASV_16s_9148 | 0.42914448  | -0.307983984 | 3.549792491 | 1.363545812 | 0.986661749 | NA |
| ASV_16s_9149 | 0.38395577  | 1.345020269  | 3.550300023 | 1.133576606 | NA          | NA |
| ASV_16s_9150 | 0.432214675 | 1.245298003  | 3.548724933 | 1.326471392 | 0.987717721 | NA |
| ASV_16s_9151 | 0.493273238 | -0.739161155 | 3.549562199 | 1.721635183 | 0.973631726 | NA |
| ASV_16s_9152 | 0.449506166 | -0.671893093 | 3.549797476 | 1.642198211 | 0.976974748 | NA |
| ASV_16s_9153 | 0.412182678 | -0.918483819 | 3.549375016 | 1.327003012 | NA          | NA |
| ASV_16s_9154 | 0.399125969 | -0.905686733 | 3.549930006 | 0.793460958 | 0.997510115 | NA |
| ASV_16s_9155 | 0.43198703  | 1.384153076  | 3.548819466 | 0.682993366 | 0.998463022 | NA |
| ASV_16s_9156 | 0.384735539 | -0.874345998 | 3.54966857  | 1.462844642 | 0.983568172 | NA |
| ASV_16s_9157 | 0.605824487 | 0.271546782  | 3.549894364 | 1.032180759 | NA          | NA |
| ASV_16s_9158 | 0.41090404  | 1.337607881  | 3.550200592 | 0.884605643 | NA          | NA |
| ASV_16s_9159 | 0.378590099 | -0.074744705 | 3.549949376 | 1.349794226 | NA          | NA |

|              |             |              |             |             |             |    |
|--------------|-------------|--------------|-------------|-------------|-------------|----|
| ASV_16s_9160 | 0.322455345 | 0.230127396  | 3.549921932 | 1.380549612 | NA          | NA |
| ASV_16s_9161 | 0.233297743 | 1.274765665  | 3.550652366 | 0.632177736 | NA          | NA |
| ASV_16s_9162 | 0.129495972 | 0.360921204  | 3.55156208  | 0.464952228 | NA          | NA |
| ASV_16s_9163 | 0.129495972 | 0.360921204  | 3.55156208  | 0.464952228 | NA          | NA |
| ASV_16s_9164 | 0.184371074 | 1.216770936  | 3.550854306 | 0.551030291 | NA          | NA |
| ASV_16s_9165 | 0.250870984 | 0.22001943   | 3.55069198  | 0.890846296 | 0.996402574 | NA |
| ASV_16s_9166 | 0.254669018 | 0.220018001  | 3.550690257 | 0.898421957 | 0.996305055 | NA |
| ASV_16s_9167 | 0.390918907 | -0.717902772 | 3.549945005 | 0.998728802 | 0.994849017 | NA |
| ASV_16s_9168 | 0.506860609 | 1.425872086  | 3.548866666 | 1.306826483 | 0.988255793 | NA |
| ASV_16s_9169 | 0.44158479  | 1.641226881  | 3.549165263 | 1.269927241 | 0.989226728 | NA |
| ASV_16s_9170 | 0.379660611 | -0.06921817  | 3.549893325 | 1.796248835 | 0.970252473 | NA |
| ASV_16s_9171 | 0.378856763 | -0.068987095 | 3.549835237 | 1.79717084  | NA          | NA |
| ASV_16s_9172 | 0.293953139 | -0.415047501 | 3.551459127 | 0.588872949 | NA          | NA |
| ASV_16s_9173 | 0.295620431 | 1.291743698  | 3.550867911 | 0.773275461 | NA          | NA |
| ASV_16s_9174 | 0.302527947 | -0.601961558 | 3.550693175 | 0.816979357 | NA          | NA |
| ASV_16s_9175 | 0.512379639 | 0.348982323  | 3.55086375  | 0.798121723 | 0.997463075 | NA |
| ASV_16s_9176 | 0.531137758 | 0.630388767  | 3.55075293  | 1.964383751 | NA          | NA |
| ASV_16s_9177 | 0.446666033 | 0.343027267  | 3.549699841 | 1.932721642 | 0.963469964 | NA |
| ASV_16s_9178 | 0.421868497 | 0.150996917  | 3.54984503  | 2.09152579  | 0.954601262 | NA |
| ASV_16s_9179 | 0.567151048 | 0.819665157  | 3.54914015  | 1.304408857 | NA          | NA |
| ASV_16s_9180 | 0.553735501 | 0.978268333  | 3.549305423 | 2.218595254 | 0.946757701 | NA |
| ASV_16s_9181 | 0.398677496 | 0.360397021  | 3.550848874 | 1.328451733 | NA          | NA |
| ASV_16s_9182 | 0.426394602 | 1.033915693  | 3.549612068 | 0.766577686 | NA          | NA |
| ASV_16s_9183 | 0.566777213 | 0.734954279  | 3.550765698 | 1.443447057 | 0.984203203 | NA |
| ASV_16s_9184 | 0.550850481 | 0.734936364  | 3.550771186 | 1.428968087 | NA          | NA |
| ASV_16s_9185 | 0.516304307 | 0.693685543  | 3.550696078 | 1.35530972  | 0.986900934 | NA |
| ASV_16s_9186 | 0.354927077 | 0.271659092  | 3.550584852 | 0.860030372 | NA          | NA |
| ASV_16s_9187 | 0.36321248  | -0.119613813 | 3.549897233 | 1.684970949 | NA          | NA |
| ASV_16s_9188 | 0.379060965 | -0.161527847 | 3.549827794 | 1.74511648  | NA          | NA |
| ASV_16s_9189 | 0.365283831 | -0.186131514 | 3.549851518 | 1.71711439  | NA          | NA |
| ASV_16s_9190 | 0.381417643 | -0.201838558 | 3.549802786 | 1.759196294 | NA          | NA |
| ASV_16s_9191 | 0.390552146 | -0.232363402 | 3.549770392 | 1.778133343 | 0.971094281 | NA |
| ASV_16s_9192 | 0.364564115 | -0.240802249 | 3.549833475 | 1.710729552 | 0.974106202 | NA |
| ASV_16s_9193 | 0.400678707 | -0.269757226 | 3.549739032 | 1.787603405 | 0.970655927 | NA |
| ASV_16s_9194 | 0.371830296 | -0.27865522  | 3.549806121 | 1.712026273 | 0.974050044 | NA |
| ASV_16s_9195 | 0.35952834  | -0.277009493 | 3.549839335 | 1.681614994 | 0.975348672 | NA |
| ASV_16s_9196 | 0.362820132 | -0.279676717 | 3.549829711 | 1.688526793 | 0.975056898 | NA |
| ASV_16s_9197 | 0.382684059 | -0.31086338  | 3.54977322  | 1.71544886  | 0.973901484 | NA |
| ASV_16s_9198 | 0.397384295 | -0.336566582 | 3.549736432 | 1.725882032 | 0.973445617 | NA |
| ASV_16s_9199 | 0.359107471 | -0.410426115 | 3.54983954  | 1.535048843 | NA          | NA |
| ASV_16s_9200 | 0.39862721  | -0.43040635  | 3.549742559 | 1.591703689 | 0.978964025 | NA |
| ASV_16s_9201 | 0.126882156 | -0.493036445 | 3.551210597 | 0.538034749 | NA          | NA |
| ASV_16s_9202 | 0.355423331 | -0.681313332 | 3.549987855 | 0.88009561  | NA          | NA |
| ASV_16s_9203 | 0.113240146 | -0.169611131 | 3.550741236 | 0.538135843 | NA          | NA |
| ASV_16s_9204 | 0.119401962 | 0.220115877  | 3.550818794 | 0.534858006 | NA          | NA |
| ASV_16s_9205 | 0.379197434 | 0.202894317  | 3.549275066 | 1.830966841 | 0.968600845 | NA |
| ASV_16s_9206 | 0.361423749 | -0.347527139 | 3.549402079 | 1.062180054 | NA          | NA |
| ASV_16s_9207 | 0.362423819 | -0.337924283 | 3.549339946 | 1.107169758 | NA          | NA |
| ASV_16s_9208 | 0.393356973 | -0.021796381 | 3.549106509 | 1.75886472  | 0.971974635 | NA |
| ASV_16s_9209 | 0.369240251 | 0.274399325  | 3.549580123 | 1.515507124 | 0.981767943 | NA |
| ASV_16s_9210 | 0.356619664 | -0.633038573 | 3.549757033 | 1.41976974  | 0.984958027 | NA |
| ASV_16s_9211 | 0.377477092 | -0.917601484 | 3.54958753  | 1.16937418  | 0.99161504  | NA |
| ASV_16s_9212 | 0.461076643 | -0.797216193 | 3.549351859 | 1.27882906  | 0.98899721  | NA |
| ASV_16s_9213 | 0.369558567 | -1.227327368 | 3.54970793  | 0.681395194 | NA          | NA |
| ASV_16s_9214 | 0.421460587 | -0.768839635 | 3.549157622 | 1.184991449 | NA          | NA |
| ASV_16s_9215 | 0.476963312 | -0.791603136 | 3.549115552 | 1.564917465 | NA          | NA |
| ASV_16s_9216 | 0.422112709 | 1.336126048  | 3.550061906 | 1.207487944 | NA          | NA |
| ASV_16s_9217 | 0.472173228 | -0.791011506 | 3.549331522 | 1.416531924 | 0.985059518 | NA |
| ASV_16s_9218 | 0.464830313 | -0.023614902 | 3.54915406  | 1.960159273 | 0.962012481 | NA |
| ASV_16s_9219 | 0.453157714 | -0.768193194 | 3.549450948 | 1.625339354 | 0.977650607 | NA |
| ASV_16s_9220 | 0.388813661 | 0.146898852  | 3.549755331 | 1.913352145 | 0.964479969 | NA |
| ASV_16s_9221 | 0.42864432  | -0.716191934 | 3.549682047 | 1.601443324 | 0.978588497 | NA |
| ASV_16s_9222 | 0.477783482 | 0.688610954  | 3.550555033 | 1.604314884 | 0.978477034 | NA |
| ASV_16s_9223 | 0.603058471 | -0.706312895 | 3.549022777 | 1.406672671 | NA          | NA |
| ASV_16s_9224 | 0.431840005 | -1.232316466 | 3.549188599 | 1.07531187  | 0.993520477 | NA |
| ASV_16s_9225 | 0.438533791 | 0.563167899  | 3.549503452 | 1.51191129  | 0.981894424 | NA |
| ASV_16s_9226 | 0.452344083 | -0.674681885 | 3.549789318 | 1.647479564 | 0.976760607 | NA |



|              |             |              |             |             |             |    |
|--------------|-------------|--------------|-------------|-------------|-------------|----|
| ASV_16s_9227 | 0.539077241 | 0.713062497  | 3.54933633  | 1.440828643 | NA          | NA |
| ASV_16s_9228 | 0.42089826  | 0.757623291  | 3.55004538  | 1.273783763 | NA          | NA |
| ASV_16s_9229 | 0.564398921 | 0.246757162  | 3.549573316 | 1.655287694 | 0.976441899 | NA |
| ASV_16s_9230 | 0.527243326 | 0.649646847  | 3.548410396 | 1.83466179  | 0.9684221   | NA |
| ASV_16s_9231 | 0.443010211 | -0.72054687  | 3.549471843 | 1.429104824 | NA          | NA |
| ASV_16s_9232 | 0.456118036 | -0.076852514 | 3.549485859 | 2.081072627 | 0.95521711  | NA |
| ASV_16s_9233 | 0.465243722 | 2.081901544  | 3.549732578 | 0.589381469 | 0.999048959 | NA |
| ASV_16s_9234 | 0.406234676 | 1.337539286  | 3.550216628 | 0.88091473  | NA          | NA |
| ASV_16s_9235 | 0.39852024  | 1.959144424  | 3.54985447  | 0.542859974 | NA          | NA |
| ASV_16s_9236 | 0.473520508 | -0.417384954 | 3.549502454 | 1.231340765 | NA          | NA |
| ASV_16s_9237 | 0.510133767 | 0.654483963  | 3.551035632 | 0.796220791 | 0.99748233  | NA |
| ASV_16s_9238 | 0.298459246 | 0.397321993  | 3.550935244 | 0.806000557 | NA          | NA |
| ASV_16s_9239 | 0.330791577 | 0.104780981  | 3.550074619 | 1.436140223 | NA          | NA |
| ASV_16s_9240 | 0.480422974 | 0.403387841  | 3.550212164 | 0.960323768 | NA          | NA |
| ASV_16s_9241 | 0.548253165 | -0.970169167 | 3.549326888 | 0.721308294 | NA          | NA |
| ASV_16s_9242 | 0.438722482 | -0.565654579 | 3.549605112 | 0.925312308 | 0.995945089 | NA |
| ASV_16s_9243 | 0.298074597 | -0.563924309 | 3.550036936 | 0.801239807 | NA          | NA |
| ASV_16s_9244 | 0.339769816 | -1.355718161 | 3.549615109 | 0.490119613 | 0.999481861 | NA |
| ASV_16s_9245 | 0.250886906 | -0.547271359 | 3.550006231 | 0.675888773 | NA          | NA |
| ASV_16s_9246 | 0.243847157 | 0.220022015  | 3.550695306 | 0.876537503 | 0.996582167 | NA |
| ASV_16s_9247 | 0.258871158 | 0.224064866  | 3.550742034 | 0.715458082 | 0.998214124 | NA |
| ASV_16s_9248 | 0.248550052 | 0.220020252  | 3.550693059 | 0.88615131  | 0.996462162 | NA |
| ASV_16s_9249 | 0.253222955 | 0.220018601  | 3.550690909 | 0.895537776 | 0.996342382 | NA |
| ASV_16s_9250 | 0.261190928 | 0.220016023  | 3.55068742  | 0.91117122  | 0.996137092 | NA |
| ASV_16s_9251 | 0.277613968 | 0.486513737  | 3.550630361 | 1.013846893 | NA          | NA |
| ASV_16s_9252 | 0.525336639 | 0.833547255  | 3.548067801 | 1.156070728 | 0.991903439 | NA |
| ASV_16s_9253 | 0.370857709 | -0.069112489 | 3.549865407 | 1.785038664 | NA          | NA |
| ASV_16s_9254 | 0.371848746 | -0.069081101 | 3.549855219 | 1.787737496 | NA          | NA |
| ASV_16s_9255 | 0.442437954 | -0.237664176 | 3.550675066 | 1.225146781 | NA          | NA |
| ASV_16s_9256 | 0.376803929 | -0.068850654 | 3.549852322 | 1.7745182   | NA          | NA |
| ASV_16s_9257 | 0.113640942 | -0.379130866 | 3.551500106 | 0.491830097 | NA          | NA |
| ASV_16s_9258 | 0.418661672 | -0.105744903 | 3.550237331 | 1.579286295 | 0.97943715  | NA |
| ASV_16s_9259 | 0.516153157 | -0.002615218 | 3.549629239 | 2.058665127 | 0.956522085 | NA |
| ASV_16s_9260 | 0.667077126 | 0.638673491  | 3.549536558 | 2.204012747 | 0.947691156 | NA |
| ASV_16s_9261 | 0.510406906 | 0.34272477   | 3.549623516 | 2.064511388 | NA          | NA |
| ASV_16s_9262 | 0.534515863 | 0.562330165  | 3.549670628 | 1.983729919 | 0.960735383 | NA |
| ASV_16s_9263 | 0.513588683 | 0.76606547   | 3.549708772 | 1.449276972 | NA          | NA |
| ASV_16s_9264 | 0.509869855 | 0.363398604  | 3.550136078 | 1.050290609 | NA          | NA |
| ASV_16s_9265 | 0.497696414 | 0.342721062  | 3.55066442  | 1.133723242 | 0.992373723 | NA |
| ASV_16s_9266 | 0.39414707  | 0.360396129  | 3.550851802 | 1.322637393 | NA          | NA |
| ASV_16s_9267 | 0.39414707  | 0.360396129  | 3.550851802 | 1.322637393 | NA          | NA |
| ASV_16s_9268 | 0.474874379 | 0.315939402  | 3.550738577 | 1.378242624 | 0.98622837  | NA |
| ASV_16s_9269 | 0.519531567 | 0.315939224  | 3.550725599 | 1.423838058 | 0.984829914 | NA |
| ASV_16s_9270 | 0.43274651  | 0.31593925   | 3.550753276 | 1.331062085 | 0.987589847 | NA |
| ASV_16s_9271 | 0.411671506 | 0.430510896  | 3.550745267 | 2.136266462 | NA          | NA |
| ASV_16s_9272 | 0.544590817 | 0.734928652  | 3.550773432 | 1.423147363 | NA          | NA |
| ASV_16s_9273 | 0.460500303 | 0.693627784  | 3.550713469 | 1.297197016 | 0.988514157 | NA |
| ASV_16s_9274 | 0.350847455 | 0.271662222  | 3.550604165 | 0.856301789 | NA          | NA |
| ASV_16s_9275 | 0.37075755  | -0.136739643 | 3.549864504 | 1.713875831 | NA          | NA |
| ASV_16s_9276 | 0.378766264 | -0.153521009 | 3.549833084 | 1.742146913 | NA          | NA |
| ASV_16s_9277 | 0.351041394 | -0.129367246 | 3.549925845 | 1.659382806 | NA          | NA |
| ASV_16s_9278 | 0.373413337 | -0.24836301  | 3.549808371 | 1.730692054 | 0.973233921 | NA |
| ASV_16s_9279 | 0.369056458 | -0.268382475 | 3.549815662 | 1.710743598 | 0.974105594 | NA |
| ASV_16s_9280 | 0.351132659 | -0.261670639 | 3.549866234 | 1.667555898 | NA          | NA |
| ASV_16s_9281 | 0.351144067 | -0.278535303 | 3.549862691 | 1.658770654 | NA          | NA |
| ASV_16s_9282 | 0.390945679 | -0.316517886 | 3.549752843 | 1.730309488 | 0.973250793 | NA |
| ASV_16s_9283 | 0.356575658 | -0.471742323 | 3.549865355 | 1.398868747 | NA          | NA |
| ASV_16s_9284 | 0.125423741 | -0.489058288 | 3.551220917 | 0.534276248 | NA          | NA |
| ASV_16s_9285 | 0.351338005 | -0.681249294 | 3.55000233  | 0.876369912 | NA          | NA |
| ASV_16s_9289 | 0.362569019 | 0.161206963  | 3.549822832 | 1.657319416 | NA          | NA |
| ASV_16s_9290 | 0.391546638 | 0.016765753  | 3.549508851 | 1.726942632 | 0.973399021 | NA |
| ASV_16s_9291 | 0.41861465  | -0.480485477 | 3.54966681  | 1.590857954 | NA          | NA |
| ASV_16s_9292 | 0.363042258 | 0.515826882  | 3.549464836 | 1.608230089 | NA          | NA |
| ASV_16s_9293 | 0.37792485  | 0.067609888  | 3.549167142 | 1.814418802 | 0.969394362 | NA |
| ASV_16s_9294 | 0.372644539 | -0.631225584 | 3.292755972 | 1.534155322 | 0.98110359  | NA |
| ASV_16s_9295 | 0.382640275 | -0.017344561 | 3.549052114 | 1.810892583 | 0.969561974 | NA |
| ASV_16s_9296 | 0.376349882 | -0.367405359 | 3.549704938 | 1.413147211 | NA          | NA |

|              |             |              |             |             |             |    |
|--------------|-------------|--------------|-------------|-------------|-------------|----|
| ASV_16s_9297 | 0.468969541 | -0.771205951 | 3.549820493 | 1.104695478 | 0.992958369 | NA |
| ASV_16s_9298 | 0.41820755  | -0.722223488 | 3.549548065 | 1.566835708 | NA          | NA |
| ASV_16s_9299 | 0.483097664 | -1.316286587 | 3.549127763 | 1.300284192 | 0.988431711 | NA |
| ASV_16s_9300 | 0.444023552 | -0.755732492 | 3.549538535 | 1.618623487 | 0.977916573 | NA |
| ASV_16s_9301 | 0.428340445 | -0.834332214 | 3.549374843 | 1.352049746 | NA          | NA |
| ASV_16s_9302 | 0.533319679 | 0.421464816  | 3.550416412 | 1.750498763 | NA          | NA |
| ASV_16s_9303 | 0.441366144 | 0.182572334  | 3.54942517  | 1.610184306 | NA          | NA |
| ASV_16s_9304 | 0.410271197 | -0.282431314 | 3.549480694 | 0.849987014 | NA          | NA |
| ASV_16s_9305 | 0.487581034 | -0.298093442 | 3.549618171 | 1.973719842 | 0.961280569 | NA |
| ASV_16s_9306 | 0.418727407 | 0.217429606  | 3.549538322 | 1.452283339 | NA          | NA |
| ASV_16s_9307 | 0.364634421 | -0.159550475 | 3.551586306 | 0.500117273 | NA          | NA |
| ASV_16s_9308 | 0.404479056 | -0.348918757 | 3.550283334 | 1.44916076  | 0.984017711 | NA |
| ASV_16s_9309 | 0.391903514 | -0.070685752 | 3.550578466 | 1.31954862  | 0.987909023 | NA |
| ASV_16s_9310 | 0.475062667 | 0.519801969  | 3.550728843 | 2.092483153 | 0.954544634 | NA |
| ASV_16s_9311 | 0.499499398 | -0.303555619 | 3.550250325 | 2.40997874  | 0.933721858 | NA |
| ASV_16s_9312 | 0.532719648 | -0.008642684 | 3.549729865 | 1.731424123 | NA          | NA |
| ASV_16s_9313 | 0.498732425 | 2.121793394  | 3.549641622 | 0.605065323 | NA          | NA |
| ASV_16s_9314 | 0.396971884 | 1.876458766  | 3.550125151 | 0.609331786 | NA          | NA |
| ASV_16s_9315 | 0.47490087  | 0.403382587  | 3.5502272   | 0.956589864 | NA          | NA |
| ASV_16s_9316 | 0.513540076 | -0.566194405 | 3.549471124 | 0.975978955 | NA          | NA |
| ASV_16s_9317 | 0.189550797 | -0.384920255 | 3.551292164 | 0.642399096 | NA          | NA |
| ASV_16s_9318 | 0.589575504 | -0.566602331 | 3.549369606 | 1.020432393 | NA          | NA |
| ASV_16s_9319 | 0.6126098   | -1.889084037 | 3.548161574 | 0.545109805 | NA          | NA |
| ASV_16s_9320 | 0.823803176 | -0.567388909 | 3.549174173 | 1.128206045 | NA          | NA |
| ASV_16s_9321 | 0.346487899 | -0.951213795 | 3.549758028 | 0.929462361 | NA          | NA |
| ASV_16s_9322 | 0.126552882 | 0.35961486   | 3.551574743 | 0.457790046 | NA          | NA |
| ASV_16s_9323 | 0.204205707 | -0.541711211 | 3.550295723 | 0.61057949  | NA          | NA |
| ASV_16s_9324 | 0.204205707 | -0.541711211 | 3.550295723 | 0.61057949  | NA          | NA |
| ASV_16s_9325 | 0.36149324  | -0.079126868 | 3.550665756 | 1.235320055 | 0.990090794 | NA |
| ASV_16s_9326 | 0.243323495 | 0.220022097  | 3.550695562 | 0.875442723 | 0.996595662 | NA |
| ASV_16s_9327 | 0.257815174 | 0.220017146  | 3.550688873 | 0.904592458 | NA          | NA |
| ASV_16s_9328 | 0.408415902 | 0.040145914  | 3.55013728  | 1.919162088 | NA          | NA |
| ASV_16s_9329 | 0.360381063 | -0.069284182 | 3.550038024 | 1.713402573 | NA          | NA |
| ASV_16s_9330 | 0.41923337  | 1.414021794  | 3.54999457  | 1.512760922 | NA          | NA |
| ASV_16s_9331 | 0.267008948 | -0.928020584 | 3.550082343 | 0.57280104  | NA          | NA |
| ASV_16s_9332 | 0.581339826 | 0.66970072   | 3.549588656 | 2.073638294 | 0.955652367 | NA |
| ASV_16s_9333 | 0.383109311 | 1.378492468  | 3.550451947 | 1.005164814 | NA          | NA |
| ASV_16s_9334 | 0.374751094 | -0.06862316  | 3.549889747 | 1.741746101 | NA          | NA |
| ASV_16s_9335 | 0.447938214 | -0.564066642 | 3.548961491 | 1.594594791 | 0.97885296  | NA |
| ASV_16s_9336 | 0.293361265 | -1.07856129  | 3.549791374 | 0.476809554 | NA          | NA |
| ASV_16s_9337 | 0.173721836 | 0.279026767  | 3.551605841 | 0.638863265 | NA          | NA |
| ASV_16s_9338 | 0.173721836 | 0.279026767  | 3.551605841 | 0.638863265 | NA          | NA |
| ASV_16s_9339 | 0.173721836 | 0.279026767  | 3.551605841 | 0.638863265 | NA          | NA |
| ASV_16s_9340 | 0.112334724 | -0.376034536 | 3.551505226 | 0.488259566 | NA          | NA |
| ASV_16s_9341 | 0.606124073 | 0.362118285  | 3.55082031  | 0.809200368 | 0.997348923 | NA |
| ASV_16s_9342 | 0.460897717 | -0.549743835 | 3.549407916 | 0.870557376 | NA          | NA |
| ASV_16s_9343 | 0.330684748 | -0.078787743 | 3.550477804 | 1.439026143 | NA          | NA |
| ASV_16s_9344 | 0.336349778 | -0.11767686  | 3.549809577 | 1.649712305 | 0.97666973  | NA |
| ASV_16s_9345 | 0.426603534 | 0.342858631  | 3.549751096 | 1.855470437 | NA          | NA |
| ASV_16s_9346 | 0.460381651 | 0.343664431  | 3.549813311 | 1.825533547 | NA          | NA |
| ASV_16s_9347 | 0.500561381 | 0.343964939  | 3.549827123 | 1.845657693 | NA          | NA |
| ASV_16s_9348 | 0.468771905 | 0.315939216  | 3.550740547 | 1.371631705 | 0.986424356 | NA |
| ASV_16s_9349 | 0.421996257 | 0.315939426  | 3.550757498 | 1.318281584 | 0.987943837 | NA |
| ASV_16s_9350 | 0.419258692 | 0.315939427  | 3.550758607 | 1.314977522 | 0.988034331 | NA |
| ASV_16s_9351 | 0.41497354  | 0.716223454  | 3.550135249 | 1.619367208 | 0.977887211 | NA |
| ASV_16s_9352 | 0.417547714 | 0.315939427  | 3.550759308 | 1.312901624 | 0.988090974 | NA |
| ASV_16s_9353 | 0.511661483 | 1.153074554  | 3.550242625 | 1.061557368 | 0.993773483 | NA |
| ASV_16s_9354 | 0.538525607 | 1.071033012  | 3.550430405 | 1.137695075 | 0.992291431 | NA |
| ASV_16s_9355 | 0.266665385 | 0.734218356  | 3.550978567 | 1.061379946 | NA          | NA |
| ASV_16s_9356 | 0.454118771 | 0.693620225  | 3.55071573  | 1.290110787 | 0.988702031 | NA |
| ASV_16s_9357 | 0.565318501 | 0.693726146  | 3.550683634 | 1.401357726 | 0.985529642 | NA |
| ASV_16s_9358 | 0.346767834 | 0.271665423  | 3.550623927 | 0.852529728 | NA          | NA |
| ASV_16s_9359 | 0.363937979 | -0.128645852 | 3.549888805 | 1.69064119  | NA          | NA |
| ASV_16s_9360 | 0.355571074 | -0.143214268 | 3.549902959 | 1.678447155 | NA          | NA |
| ASV_16s_9361 | 0.347007405 | -0.199725463 | 3.549897617 | 1.669972097 | NA          | NA |
| ASV_16s_9362 | 0.374857038 | -0.234083013 | 3.549808403 | 1.738706743 | 0.972879041 | NA |
| ASV_16s_9363 | 0.380165965 | -0.293016477 | 3.549782165 | 1.723209444 | 0.973562825 | NA |

|              |             |              |             |              |             |    |
|--------------|-------------|--------------|-------------|--------------|-------------|----|
| ASV_16s_9364 | 0.408625359 | -0.367152934 | 3.549711484 | 1.715231071  | 0.973910952 | NA |
| ASV_16s_9365 | 0.383597081 | -0.352496323 | 3.549768682 | 1.675839105  | 0.975590974 | NA |
| ASV_16s_9366 | 0.123965325 | -0.485036707 | 3.551231424 | 0.530484153  | NA          | NA |
| ASV_16s_9367 | 0.398483482 | -0.681916988 | 3.549853504 | 0.916831434  | NA          | NA |
| ASV_16s_9368 | 0.155132453 | 0.200450741  | 3.550690968 | 1.073405361  | 0.993555929 | NA |
| ASV_16s_9369 | 0.066660408 | -0.16895859  | 3.550904401 | 0.330699176  | NA          | NA |
| ASV_16s_9370 | 0.154231695 | 0.220074412  | 3.550764221 | 0.651621704  | NA          | NA |
| ASV_16s_9372 | 0.363748776 | 0.00880317   | 3.54979619  | 1.668286794  | NA          | NA |
| ASV_16s_9373 | 0.39011858  | 0.184971149  | 3.549673164 | 1.599690869  | 0.978656353 | NA |
| ASV_16s_9374 | 0.379914389 | 0.003995376  | 3.549364043 | 1.684507955  | 0.97522679  | NA |
| ASV_16s_9375 | 0.45127727  | -0.813855189 | 3.54890395  | 0.988760065  | 0.99500782  | NA |
| ASV_16s_9376 | 0.488632176 | -0.20826384  | 3.54889879  | 2.111360683  | 0.953420344 | NA |
| ASV_16s_9377 | 0.396296855 | 0.717188645  | 3.550132916 | 1.403128174  | NA          | NA |
| ASV_16s_9378 | 0.378211988 | 0.172786352  | 3.549690408 | 1.466775183  | 0.983437662 | NA |
| ASV_16s_9379 | 0.429383909 | -0.79126791  | 3.549267654 | 1.43407827   | NA          | NA |
| ASV_16s_9380 | 0.471144353 | 2.21596646   | 3.549018131 | 0.417066901  | 0.999697077 | NA |
| ASV_16s_9381 | 0.38806517  | 0.588289958  | 3.551442355 | 0.750067412  | NA          | NA |
| ASV_16s_9382 | 0.489771751 | -0.730501419 | 3.548734901 | 1.324884291  | NA          | NA |
| ASV_16s_9383 | 0.450131838 | -0.764973219 | 3.549474728 | 1.622417213  | 0.97776656  | NA |
| ASV_16s_9384 | 0.405622094 | -0.875204353 | 3.54994241  | 1.044736639  | NA          | NA |
| ASV_16s_9385 | 0.374118448 | 0.362172057  | 3.548944696 | 1.132046531  | NA          | NA |
| ASV_16s_9386 | 0.398278183 | -0.641357669 | 3.549953656 | 1.277342772  | 0.98903574  | NA |
| ASV_16s_9387 | 0.359008986 | -0.673009675 | 3.549933439 | 1.192392393  | NA          | NA |
| ASV_16s_9388 | 0.41493307  | -0.684178658 | 3.549790677 | 1.577017338  | NA          | NA |
| ASV_16s_9389 | 0.418746103 | 0.148816382  | 3.549195393 | 1.242399252  | 0.989917675 | NA |
| ASV_16s_9390 | 0.434197087 | 25.07102199  | 3.549670244 | -0.537576775 | 1           | NA |
| ASV_16s_9391 | 0.261401537 | 0.461355643  | 3.550676044 | 0.901900157  | 0.996259712 | NA |
| ASV_16s_9392 | 0.49990028  | -0.583414693 | 3.548964551 | 1.266308928  | 0.989319167 | NA |
| ASV_16s_9393 | 0.296900558 | -0.969720305 | 3.549945877 | 0.541499835  | NA          | NA |
| ASV_16s_9394 | 0.279272867 | 1.311122148  | 3.550494984 | 0.694153958  | NA          | NA |
| ASV_16s_9395 | 0.60616341  | 1.338399721  | 3.549671308 | 0.94633247   | NA          | NA |
| ASV_16s_9396 | 0.125081337 | 0.358901384  | 3.551580843 | 0.454157495  | NA          | NA |
| ASV_16s_9397 | 0.248000147 | 0.220020443  | 3.550693319 | 0.885009325  | 0.996476558 | NA |
| ASV_16s_9398 | 0.255327193 | 0.220017987  | 3.550689969 | 0.899686183  | NA          | NA |
| ASV_16s_9399 | 0.254913298 | 0.220018014  | 3.550690152 | 0.898867858  | 0.996299262 | NA |
| ASV_16s_9400 | 0.465518884 | -0.129998179 | 3.548785196 | 1.307692699  | 0.988232379 | NA |
| ASV_16s_9401 | 0.481893502 | 0.76497573   | 3.54949536  | 1.585735595  | 0.979192209 | NA |
| ASV_16s_9402 | 0.321607299 | -0.033486414 | 3.550571793 | 0.449549606  | 0.999611048 | NA |
| ASV_16s_9403 | 0.342529799 | 0.343640966  | 3.550233742 | 1.312230099  | NA          | NA |
| ASV_16s_9404 | 0.369984782 | -0.235563258 | 3.549936703 | 1.515698988  | NA          | NA |
| ASV_16s_9405 | 0.385200367 | -0.069227464 | 3.549887354 | 1.808438522  | 0.969678315 | NA |
| ASV_16s_9406 | 0.42379263  | 1.553324705  | 3.549275467 | 0.839316829  | NA          | NA |
| ASV_16s_9407 | 0.3853505   | -0.059075837 | 3.550317505 | 1.524698321  | NA          | NA |
| ASV_16s_9408 | 0.437147548 | 0.677119009  | 3.550710023 | 1.309263565  | 0.988189845 | NA |
| ASV_16s_9409 | 0.713531454 | -0.199332645 | 3.547556515 | 2.38279193   | NA          | NA |
| ASV_16s_9410 | 0.445475414 | 1.234558682  | 3.549852348 | 1.539148744  | 0.980923298 | NA |
| ASV_16s_9411 | 0.325504626 | -0.117728389 | 3.549854993 | 1.609333692  | NA          | NA |
| ASV_16s_9412 | 0.544642646 | 0.2490977    | 3.55033598  | 2.01996098   | 0.95872731  | NA |
| ASV_16s_9413 | 0.485577116 | 0.586148503  | 3.549095655 | 1.850412961  | 0.96765373  | NA |
| ASV_16s_9414 | 0.379745902 | -0.029344873 | 3.55073337  | 1.319510582  | NA          | NA |
| ASV_16s_9415 | 0.468120593 | 0.356516067  | 3.550119879 | 1.725970769  | 0.97344172  | NA |
| ASV_16s_9416 | 0.295153668 | 0.734350273  | 3.55093991  | 1.11238863   | 0.992806284 | NA |
| ASV_16s_9417 | 0.513868353 | 0.981135233  | 3.550596336 | 1.161320716  | 0.991790383 | NA |
| ASV_16s_9418 | 0.487969572 | 0.693656785  | 3.550704414 | 1.32661504   | 0.987713732 | NA |
| ASV_16s_9419 | 0.502084677 | 0.69367429   | 3.550700145 | 1.341102214  | 0.987307349 | NA |
| ASV_16s_9420 | 0.437011109 | 0.69359841   | 3.550722113 | 1.270624836  | 0.98920885  | NA |
| ASV_16s_9421 | 0.499350109 | 0.693665123  | 3.550700955 | 1.338309661  | 0.987386314 | NA |
| ASV_16s_9422 | 0.493960411 | 0.693660782  | 3.550702576 | 1.332777357  | 0.98754186  | NA |
| ASV_16s_9423 | 0.448558713 | 0.693613459  | 3.550717751 | 1.283856217  | 0.988866273 | NA |
| ASV_16s_9424 | 0.353303885 | -0.206093887 | 3.549876441 | 1.686802169  | NA          | NA |
| ASV_16s_9425 | 0.34905057  | -0.276768442 | 3.549869248 | 1.654167018  | 0.976487798 | NA |
| ASV_16s_9426 | 0.342973415 | -0.271569504 | 3.549888644 | 1.64075884   | NA          | NA |
| ASV_16s_9427 | 0.352865904 | -0.305740718 | 3.549852798 | 1.64474964   | 0.97687144  | NA |
| ASV_16s_9428 | 0.365275799 | -0.314982156 | 3.549817315 | 1.668889915  | 0.975880662 | NA |
| ASV_16s_9429 | 0.373339702 | -0.346007559 | 3.549794436 | 1.65853164   | 0.976308748 | NA |
| ASV_16s_9430 | 0.399811539 | -0.362168401 | 3.549730788 | 1.70177587   | 0.974492054 | NA |
| ASV_16s_9431 | 0.377853787 | -0.34890245  | 3.549782914 | 1.666249087  | 0.975990224 | NA |

|              |             |              |             |             |             |    |
|--------------|-------------|--------------|-------------|-------------|-------------|----|
| ASV_16s_9432 | 0.3488601   | -0.375408363 | 3.549863621 | 1.563708538 | 0.980021755 | NA |
| ASV_16s_9433 | 0.361105674 | -0.561549618 | 3.549890626 | 1.189856847 | NA          | NA |
| ASV_16s_9434 | 0.343167354 | -0.681116809 | 3.550032305 | 0.868787421 | NA          | NA |
| ASV_16s_9435 | 0.394648035 | -0.026871357 | 3.549629428 | 1.773139358 | 0.971323937 | NA |
| ASV_16s_9436 | 0.384198217 | 0.041620484  | 3.549443724 | 1.722276084 | 0.973603688 | NA |
| ASV_16s_9437 | 0.364749961 | 0.070379231  | 3.549426986 | 1.702597237 | NA          | NA |
| ASV_16s_9438 | 0.34728597  | 0.414673298  | 3.549882406 | 1.600759059 | NA          | NA |
| ASV_16s_9439 | 0.357922939 | -0.818393397 | 3.549702759 | 1.288465792 | 0.988745371 | NA |
| ASV_16s_9440 | 0.356124451 | -0.249960708 | 3.550144672 | 1.399301463 | 0.98559265  | NA |
| ASV_16s_9441 | 0.354394361 | 0.427170914  | 3.549473293 | 1.662887124 | NA          | NA |
| ASV_16s_9442 | 0.43689657  | 0.048186141  | 3.549023094 | 2.038329323 | 0.957688472 | NA |
| ASV_16s_9443 | 0.352020203 | -0.320751137 | 3.550826255 | 0.96583546  | 0.995360992 | NA |
| ASV_16s_9444 | 0.426507603 | -0.77697716  | 3.549436361 | 1.542741036 | 0.980792968 | NA |
| ASV_16s_9445 | 0.463656031 | -0.775416851 | 3.549395583 | 1.639102734 | 0.977099724 | NA |
| ASV_16s_9446 | 0.43530243  | -0.761443619 | 3.54951414  | 1.592201792 | 0.978944914 | NA |
| ASV_16s_9447 | 0.448014888 | -0.757658644 | 3.54952534  | 1.625848267 | 0.977630377 | NA |
| ASV_16s_9448 | 0.45829645  | -1.882835139 | 3.547676659 | 0.493651748 | 0.999469396 | NA |
| ASV_16s_9449 | 0.446185344 | -0.733006983 | 3.549618153 | 1.633616792 | 0.977320237 | NA |
| ASV_16s_9450 | 0.470940821 | -0.276796856 | 3.549434708 | 1.64108794  | NA          | NA |
| ASV_16s_9451 | 0.445176834 | -0.722772051 | 3.549649524 | 1.633830494 | 0.977311671 | NA |
| ASV_16s_9452 | 0.303786169 | -0.185233858 | 3.549968396 | 1.30127504  | NA          | NA |
| ASV_16s_9453 | 0.429019752 | -0.673315382 | 3.549807941 | 1.604792194 | NA          | NA |
| ASV_16s_9454 | 0.420666085 | -0.651521727 | 3.549864236 | 1.58708991  | 0.979140557 | NA |
| ASV_16s_9455 | 0.378471421 | 1.520484134  | 3.54884553  | 0.907798947 | NA          | NA |
| ASV_16s_9456 | 0.419281763 | -0.06831356  | 3.550219179 | 1.482027166 | 0.982925363 | NA |
| ASV_16s_9457 | 0.472534739 | 0.187926201  | 3.550394837 | 1.595639059 | 0.978812759 | NA |
| ASV_16s_9458 | 0.401219702 | -0.417130193 | 3.550361524 | 1.452176896 | 0.983919269 | NA |
| ASV_16s_9459 | 0.419857575 | -1.009878885 | 3.349038322 | 0.602636415 | 0.998977192 | NA |
| ASV_16s_9460 | 0.479601207 | 0.913736509  | 3.548378758 | 1.269789468 | 0.989230257 | NA |
| ASV_16s_9461 | 0.405034487 | 0.220559563  | 3.54883165  | 1.744227644 | NA          | NA |
| ASV_16s_9462 | 0.261733026 | 0.117203548  | 3.550686301 | 0.746995592 | 0.997948014 | NA |
| ASV_16s_9463 | 0.427495509 | 1.337845065  | 3.550146642 | 0.897310635 | NA          | NA |
| ASV_16s_9464 | 0.48015567  | 0.4033874    | 3.550213118 | 0.960051697 | 0.995447475 | NA |
| ASV_16s_9465 | 0.251990842 | 0.22904166   | 3.550854188 | 0.524363908 | 0.99935229  | NA |
| ASV_16s_9466 | 0.353835328 | -1.347501695 | 3.549442242 | 0.687542089 | 0.998429637 | NA |
| ASV_16s_9467 | 0.487947209 | -0.273818794 | 3.547950974 | 1.558166958 | NA          | NA |
| ASV_16s_9468 | 0.230932919 | -0.540649481 | 3.550563892 | 0.682389993 | NA          | NA |
| ASV_16s_9469 | 0.251471015 | -1.106223175 | 3.550177893 | 0.430312661 | NA          | NA |
| ASV_16s_9470 | 0.396774855 | 0.703759525  | 3.549854796 | 1.556126051 | 0.98030272  | NA |
| ASV_16s_9471 | 0.259055399 | 0.189933481  | 3.549830018 | 1.246596047 | NA          | NA |
| ASV_16s_9472 | 0.222003746 | -0.544593354 | 3.550172507 | 0.636956827 | NA          | NA |
| ASV_16s_9473 | 0.244211407 | 0.220021847  | 3.550695132 | 0.877247021 | 0.996573403 | NA |
| ASV_16s_9474 | 0.252323344 | 0.220019022  | 3.55069132  | 0.893704567 | NA          | NA |
| ASV_16s_9475 | 0.273552497 | 0.21930647   | 3.550705314 | 0.67438743  | NA          | NA |
| ASV_16s_9476 | 0.417229801 | 0.310930937  | 3.550744942 | 1.289633331 | 0.988714621 | NA |
| ASV_16s_9477 | 0.58047978  | 0.666153167  | 3.064637702 | 3.628643977 | 0.82141779  | NA |
| ASV_16s_9478 | 0.403787262 | 1.065626409  | 3.55069588  | 0.950101201 | NA          | NA |
| ASV_16s_9479 | 0.356770912 | -0.069123536 | 3.54991285  | 1.744194753 | NA          | NA |
| ASV_16s_9480 | 0.362419826 | -0.06910489  | 3.549889795 | 1.761555092 | 0.971852647 | NA |
| ASV_16s_9481 | 0.369037752 | -0.069060875 | 3.549857173 | 1.779134433 | 0.971048119 | NA |
| ASV_16s_9482 | 0.363708169 | -0.068804562 | 3.549878453 | 1.741354792 | NA          | NA |
| ASV_16s_9483 | 0.364699206 | -0.068733139 | 3.549888294 | 1.733328446 | NA          | NA |
| ASV_16s_9484 | 0.208717573 | 0.205441316  | 3.551283515 | 0.434645454 | NA          | NA |
| ASV_16s_9485 | 0.206035247 | 0.279547107  | 3.551528043 | 0.700100658 | NA          | NA |
| ASV_16s_9486 | 0.389106032 | -0.457215194 | 3.550196824 | 1.417585292 | 0.985026545 | NA |
| ASV_16s_9487 | 0.419451766 | -0.423643664 | 3.550351597 | 1.601316311 | NA          | NA |
| ASV_16s_9488 | 0.465900341 | 0.343776823  | 3.549793799 | 1.899466901 | 0.965194369 | NA |
| ASV_16s_9489 | 0.488210731 | 0.351378742  | 3.5499804   | 1.790520011 | 0.970520168 | NA |
| ASV_16s_9490 | 0.4281029   | 0.315939329  | 3.550755079 | 1.325536873 | 0.987743653 | NA |
| ASV_16s_9491 | 0.421511717 | 0.31593933   | 3.550757697 | 1.317663165 | 0.987960806 | NA |
| ASV_16s_9492 | 0.451372101 | 0.315939328  | 3.55074645  | 1.352374568 | 0.986985538 | NA |
| ASV_16s_9493 | 0.436431665 | 0.39226795   | 3.550739623 | 2.00669055  | 0.959469133 | NA |
| ASV_16s_9494 | 0.345599399 | -0.087402646 | 3.549976766 | 1.614105185 | NA          | NA |
| ASV_16s_9495 | 0.346893994 | -0.132608661 | 3.549936296 | 1.649999253 | NA          | NA |
| ASV_16s_9496 | 0.338808233 | -0.148292539 | 3.549951058 | 1.635856157 | NA          | NA |
| ASV_16s_9497 | 0.363778154 | -0.208287026 | 3.549846253 | 1.714083909 | NA          | NA |
| ASV_16s_9498 | 0.348706425 | -0.193200103 | 3.549895513 | 1.6740507   | NA          | NA |

|              |             |              |             |             |             |    |
|--------------|-------------|--------------|-------------|-------------|-------------|----|
| ASV_16s_9499 | 0.35519585  | -0.207954472 | 3.549870307 | 1.691671988 | 0.97492347  | NA |
| ASV_16s_9500 | 0.38474818  | -0.242444186 | 3.54978165  | 1.760837722 | 0.971885204 | NA |
| ASV_16s_9501 | 0.341881035 | -0.202752386 | 3.549911959 | 1.656003757 | NA          | NA |
| ASV_16s_9502 | 0.346703524 | -0.224343808 | 3.549889144 | 1.667296966 | 0.975946785 | NA |
| ASV_16s_9503 | 0.344430295 | -0.230523832 | 3.549893972 | 1.659971531 | 0.976249506 | NA |
| ASV_16s_9504 | 0.33885957  | -0.22512424  | 3.549912842 | 1.645814128 | NA          | NA |
| ASV_16s_9505 | 0.371329882 | -0.294491388 | 3.54980431  | 1.70010289  | 0.97456378  | NA |
| ASV_16s_9506 | 0.343445956 | -0.271972407 | 3.549887136 | 1.641775159 | 0.976991852 | NA |
| ASV_16s_9507 | 0.366649502 | -0.315958463 | 3.549813578 | 1.67143717  | 0.975774708 | NA |
| ASV_16s_9508 | 0.344988061 | -0.308431238 | 3.549875576 | 1.621984777 | 0.97778369  | NA |
| ASV_16s_9509 | 0.377225699 | -0.357035914 | 3.549784661 | 1.655344007 | 0.976439592 | NA |
| ASV_16s_9510 | 0.400498254 | -0.68193482  | 3.549847964 | 0.918430698 | 0.996039279 | NA |
| ASV_16s_9511 | 0.339082028 | -0.681051479 | 3.550047831 | 0.86492889  | NA          | NA |
| ASV_16s_9512 | 0.219484808 | 0.220032079  | 3.550708489 | 0.823712947 | NA          | NA |
| ASV_16s_9513 | 0.353138754 | -0.120120351 | 3.549840331 | 1.557227191 | 0.980262064 | NA |
| ASV_16s_9514 | 0.392985257 | 0.088657007  | 3.549709629 | 1.837870679 | NA          | NA |
| ASV_16s_9515 | 0.358765234 | 0.043713245  | 3.549749975 | 1.661098757 | 0.976203069 | NA |
| ASV_16s_9516 | 0.36749274  | 0.305183992  | 3.549429728 | 1.582234756 | 0.979325381 | NA |
| ASV_16s_9517 | 0.346459824 | 0.079049084  | 3.549455917 | 1.679265005 | 0.975447422 | NA |
| ASV_16s_9518 | 0.373727306 | -0.363978444 | 3.549815035 | 1.447642376 | 0.984067132 | NA |
| ASV_16s_9519 | 0.345257101 | 0.942771232  | 3.550580964 | 0.953761222 | NA          | NA |
| ASV_16s_9520 | 0.34687724  | 0.218037343  | 3.549324895 | 1.770931837 | 0.971425121 | NA |
| ASV_16s_9521 | 0.29319784  | -0.067460851 | 3.550658475 | 1.107920994 | NA          | NA |
| ASV_16s_9522 | 0.394790237 | 0.792265318  | 3.549491276 | 1.658846236 | NA          | NA |
| ASV_16s_9523 | 0.375338722 | 0.852073999  | 3.549115517 | 1.605246721 | NA          | NA |
| ASV_16s_9524 | 0.350582831 | -0.324690065 | 3.549303413 | 1.244912021 | NA          | NA |
| ASV_16s_9525 | 0.289133095 | 0.504572904  | 3.549822001 | 1.403542168 | 0.985462524 | NA |
| ASV_16s_9526 | 0.431084863 | -0.820005653 | 3.548701466 | 0.849467506 | NA          | NA |
| ASV_16s_9527 | 0.44778046  | -0.840777062 | 3.549416745 | 1.319878611 | 0.987899946 | NA |
| ASV_16s_9528 | 0.546555492 | -1.307935708 | 3.547680612 | 0.539440474 | NA          | NA |
| ASV_16s_9529 | 0.400235106 | -0.755076181 | 3.549769694 | 1.56532633  | 0.979961504 | NA |
| ASV_16s_9530 | 0.438029641 | 0.267119061  | 3.550355689 | 1.637648292 | 0.977158308 | NA |
| ASV_16s_9531 | 0.416482869 | -0.097904586 | 3.550345389 | 1.221900069 | NA          | NA |
| ASV_16s_9532 | 0.409641557 | 0.449604059  | 3.550784185 | 1.713101744 | 0.974003415 | NA |
| ASV_16s_9533 | 0.456379938 | -0.718089923 | 3.548581391 | 0.864976487 | NA          | NA |
| ASV_16s_9534 | 0.322569252 | -1.415941724 | 3.549201639 | 0.743622462 | 0.997977652 | NA |
| ASV_16s_9535 | 0.436144559 | -0.110827152 | 3.550626831 | 1.404774698 | 0.985424571 | NA |
| ASV_16s_9536 | 0.531956063 | -0.538819208 | 3.549545755 | 1.549286529 | 0.980554141 | NA |
| ASV_16s_9537 | 0.260522836 | -0.037082598 | 3.550686967 | 0.713313878 | 0.998231335 | NA |
| ASV_16s_9538 | 0.472687744 | 0.429108771  | 3.550654381 | 1.334844016 | 0.987483892 | NA |
| ASV_16s_9539 | 0.503898226 | 1.248004995  | 3.549560511 | 1.302260482 | NA          | NA |
| ASV_16s_9540 | 0.495482355 | 0.667919842  | 3.531542082 | 1.305564116 | 0.988289865 | NA |
| ASV_16s_9541 | 0.405322987 | 0.131257383  | 3.550704029 | 0.998203422 | NA          | NA |
| ASV_16s_9542 | 0.453348369 | 2.095184412  | 3.549708542 | 0.567716091 | NA          | NA |
| ASV_16s_9543 | 0.375397015 | 1.333140899  | 3.55031609  | 0.855001885 | NA          | NA |
| ASV_16s_9544 | 0.400904723 | 1.337460324  | 3.550235483 | 0.876617176 | NA          | NA |
| ASV_16s_9545 | 0.367430876 | 0.403249843  | 3.550607961 | 0.873959974 | NA          | NA |
| ASV_16s_9546 | 0.366197333 | 0.097689266  | 3.548994812 | 1.434302846 | 0.984497358 | NA |
| ASV_16s_9547 | 0.555778692 | 0.424324622  | 3.550821793 | 0.634425642 | NA          | NA |
| ASV_16s_9548 | 0.50415339  | -0.241350397 | 3.549865285 | 1.176789535 | NA          | NA |
| ASV_16s_9549 | 0.433134007 | 0.366911112  | 3.551707669 | 0.527199876 | NA          | NA |
| ASV_16s_9550 | 0.40246541  | -1.554673436 | 3.549112522 | 0.482981083 | NA          | NA |
| ASV_16s_9551 | 0.302735568 | -0.884608957 | 3.54997755  | 0.692819012 | NA          | NA |
| ASV_16s_9552 | 0.403072167 | 0.951032066  | 3.54978891  | 1.621299405 | 0.977810822 | NA |
| ASV_16s_9553 | 0.122138247 | 0.357450401  | 3.551593383 | 0.446805608 | NA          | NA |
| ASV_16s_9554 | 0.219360844 | -0.544148011 | 3.550189626 | 0.633142663 | NA          | NA |
| ASV_16s_9555 | 0.219360844 | -0.544148011 | 3.550189626 | 0.633142663 | NA          | NA |
| ASV_16s_9556 | 0.219360844 | -0.544148011 | 3.550189626 | 0.633142663 | NA          | NA |
| ASV_16s_9557 | 0.416178856 | 0.19127758   | 3.550696414 | 2.175190373 | 0.94951083  | NA |
| ASV_16s_9558 | 0.235390309 | 0.220025207  | 3.550699577 | 0.858750157 | 0.996797144 | NA |
| ASV_16s_9559 | 0.236594639 | 0.22002463   | 3.55069895  | 0.861311446 | 0.996766748 | NA |
| ASV_16s_9560 | 0.238385911 | 0.220023923  | 3.550698031 | 0.865098487 | 0.996721462 | NA |
| ASV_16s_9561 | 0.352121778 | -0.321825264 | 3.549714694 | 0.945832068 | 0.99565566  | NA |
| ASV_16s_9562 | 0.573871049 | -1.948271364 | 3.548492321 | 0.428202595 | NA          | NA |
| ASV_16s_9563 | 0.345493673 | 0.330669791  | 3.550874537 | 0.931917093 | NA          | NA |
| ASV_16s_9564 | 0.366610518 | -0.067761999 | 3.550104878 | 1.612172238 | NA          | NA |
| ASV_16s_9565 | 0.467384036 | 1.909972516  | 3.549729603 | 0.542526139 | NA          | NA |

|              |             |              |             |             |             |    |
|--------------|-------------|--------------|-------------|-------------|-------------|----|
| ASV_16s_9566 | 0.408726647 | 0.312475857  | 3.550520975 | 0.977326693 | 0.995186043 | NA |
| ASV_16s_9567 | 0.531035157 | 0.771508343  | 3.549847849 | 1.70617722  | NA          | NA |
| ASV_16s_9568 | 0.522336306 | 0.316758376  | 3.550734767 | 1.366352097 | 0.986579648 | NA |
| ASV_16s_9569 | 0.203582447 | 0.279530328  | 3.55153357  | 0.695749437 | NA          | NA |
| ASV_16s_9570 | 0.285338859 | -0.599926728 | 3.550794147 | 0.79785722  | NA          | NA |
| ASV_16s_9571 | 0.108416071 | -0.366547271 | 3.551521119 | 0.477359448 | NA          | NA |
| ASV_16s_9572 | 0.439327899 | 0.341698689  | 3.550814304 | 0.836289595 | 0.997055727 | NA |
| ASV_16s_9573 | 0.422446513 | 0.700038539  | 3.550663655 | 1.181301795 | 0.991351066 | NA |
| ASV_16s_9574 | 0.409684404 | -0.595755223 | 3.54969478  | 1.507586092 | NA          | NA |
| ASV_16s_9575 | 0.446645606 | 0.167870677  | 3.548797619 | 1.900009349 | NA          | NA |
| ASV_16s_9576 | 0.620406444 | 0.381313147  | 3.55068748  | 2.760265679 | 0.906258886 | NA |
| ASV_16s_9577 | 0.480745349 | 0.343814123  | 3.549784987 | 1.922127855 | 0.964024307 | NA |
| ASV_16s_9578 | 0.467566755 | 0.301648051  | 3.549996688 | 2.095930753 | 0.954340398 | NA |
| ASV_16s_9579 | 0.498081972 | 0.183594379  | 3.550511154 | 2.11503209  | NA          | NA |
| ASV_16s_9580 | 0.451654815 | 0.35209283   | 3.55057147  | 1.048382652 | 0.994009846 | NA |
| ASV_16s_9581 | 0.454827022 | 0.357197907  | 3.550510756 | 1.04143226  | 0.994132202 | NA |
| ASV_16s_9582 | 0.376025366 | 0.36039228   | 3.550864215 | 1.298687521 | NA          | NA |
| ASV_16s_9583 | 0.376025366 | 0.36039228   | 3.550864215 | 1.298687521 | NA          | NA |
| ASV_16s_9584 | 0.43761149  | 0.315939349  | 3.550751447 | 1.336639731 | 0.98743339  | NA |
| ASV_16s_9585 | 0.398561406 | 0.315939355  | 3.550767489 | 1.289229691 | 0.988725258 | NA |
| ASV_16s_9586 | 0.422229651 | 0.983141173  | 3.550636192 | 1.070668558 | 0.993606604 | NA |
| ASV_16s_9587 | 0.434073018 | 0.693594797  | 3.550723263 | 1.26717168  | 0.989297171 | NA |
| ASV_16s_9588 | 0.491931873 | 0.69366407   | 3.550703194 | 1.330699169 | 0.987599986 | NA |
| ASV_16s_9589 | 0.417758964 | 0.693571847  | 3.550729923 | 1.247737373 | 0.989785902 | NA |
| ASV_16s_9590 | 0.494475879 | 0.693664731  | 3.550702424 | 1.333212976 | 0.987529655 | NA |
| ASV_16s_9591 | 0.33646689  | -0.101169119 | 3.549994498 | 1.601184875 | NA          | NA |
| ASV_16s_9592 | 0.382047206 | -0.225031833 | 3.549793178 | 1.758451984 | 0.971993323 | NA |
| ASV_16s_9593 | 0.358708489 | -0.243616443 | 3.549848927 | 1.694326455 | 0.97481054  | NA |
| ASV_16s_9594 | 0.337829933 | -0.249812044 | 3.549908953 | 1.636363899 | 0.97720997  | NA |
| ASV_16s_9595 | 0.340131683 | -0.286718627 | 3.549893895 | 1.624318815 | 0.977691143 | NA |
| ASV_16s_9596 | 0.342163105 | -0.29728038  | 3.54988574  | 1.622761411 | 0.97775292  | NA |
| ASV_16s_9597 | 0.365657258 | -0.340938599 | 3.549814741 | 1.645043119 | 0.97685954  | NA |
| ASV_16s_9598 | 0.338894129 | -0.331018255 | 3.54989238  | 1.586394517 | 0.979167088 | NA |
| ASV_16s_9599 | 0.340672337 | -0.341614795 | 3.549886639 | 1.580785406 | 0.979380367 | NA |
| ASV_16s_9600 | 0.387442804 | -0.380285361 | 3.549760873 | 1.649744631 | 0.976668413 | NA |
| ASV_16s_9601 | 0.341972635 | -0.400562155 | 3.549888557 | 1.507617234 | 0.982044779 | NA |
| ASV_16s_9602 | 0.119590078 | -0.472707515 | 3.551264119 | 0.518931185 | NA          | NA |
| ASV_16s_9603 | 0.119590078 | -0.472707515 | 3.551264119 | 0.518931185 | NA          | NA |
| ASV_16s_9604 | 0.184599268 | 0.377144935  | 3.550680996 | 1.111253465 | NA          | NA |
| ASV_16s_9605 | 0.064307688 | -0.168901249 | 3.550918878 | 0.318328915 | NA          | NA |
| ASV_16s_9606 | 0.216840413 | 0.220033233  | 3.550710098 | 0.817645454 | NA          | NA |
| ASV_16s_9607 | 0.11253978  | 0.220127099  | 3.550833527 | 0.50913761  | NA          | NA |
| ASV_16s_9608 | 0.129337839 | 0.220101686  | 3.550800256 | 0.570251418 | 0.999146437 | NA |
| ASV_16s_9609 | 0.378988759 | 0.276203881  | 3.549622694 | 1.836967952 | NA          | NA |
| ASV_16s_9610 | 0.340340925 | 0.395769314  | 3.549512881 | 1.540420202 | NA          | NA |
| ASV_16s_9611 | 0.406624092 | -0.984147391 | 3.549755153 | 1.267231488 | NA          | NA |
| ASV_16s_9612 | 0.364391458 | 0.329133656  | 3.549500132 | 1.633664866 | 0.97731831  | NA |
| ASV_16s_9613 | 0.400115903 | -0.410958821 | 3.549759578 | 1.259175574 | 0.989499968 | NA |
| ASV_16s_9614 | 0.345616252 | 0.684942206  | 3.549499646 | 1.502651049 | NA          | NA |
| ASV_16s_9615 | 0.419997112 | -0.791242983 | 3.5493031   | 1.390661317 | NA          | NA |
| ASV_16s_9616 | 0.43973887  | -0.791478139 | 3.549219776 | 1.442047261 | 0.984248448 | NA |
| ASV_16s_9617 | 0.411910855 | -0.001968499 | 3.549217395 | 1.871218349 | NA          | NA |
| ASV_16s_9618 | 0.414189495 | -0.771378361 | 3.549485353 | 1.52065174  | 0.981586073 | NA |
| ASV_16s_9619 | 0.43649939  | -0.768130593 | 3.549470861 | 1.585368798 | 0.979206186 | NA |
| ASV_16s_9620 | 0.387017081 | -0.264928836 | 3.54914093  | 1.187187583 | NA          | NA |
| ASV_16s_9621 | 0.455890757 | -0.667417205 | 3.549679218 | 1.633622045 | 0.977320027 | NA |
| ASV_16s_9622 | 0.423488061 | -0.660972609 | 3.549842561 | 1.591604508 | 0.978967829 | NA |
| ASV_16s_9623 | 0.434034423 | -0.638186068 | 3.549887049 | 1.604284741 | 0.978478206 | NA |
| ASV_16s_9624 | 0.402756906 | -0.088023164 | 3.550253497 | 1.371809376 | NA          | NA |
| ASV_16s_9625 | 0.345990381 | -0.195204165 | 3.549697051 | 1.407495527 | NA          | NA |
| ASV_16s_9626 | 0.362221703 | -0.074054129 | 3.55053853  | 1.409428694 | 0.985280721 | NA |
| ASV_16s_9627 | 0.374490797 | 0.158570742  | 3.549685799 | 1.509979602 | 0.981962154 | NA |
| ASV_16s_9628 | 0.334190829 | 0.283571355  | 3.549667613 | 1.283998987 | 0.98886254  | NA |
| ASV_16s_9629 | 0.257974216 | 1.716798129  | 3.550350526 | 0.433773497 | NA          | NA |
| ASV_16s_9630 | 0.288797812 | 0.533484896  | 3.549535708 | 0.878988989 | NA          | NA |
| ASV_16s_9631 | 0.363003998 | 0.403242711  | 3.550628451 | 0.870056147 | NA          | NA |
| ASV_16s_9632 | 0.296071483 | 0.129790349  | 3.550812089 | 0.628717436 | 0.998825519 | NA |

|              |             |              |             |             |             |    |
|--------------|-------------|--------------|-------------|-------------|-------------|----|
| ASV_16s_9633 | 0.579439411 | 0.419131353  | 3.549785544 | 0.951208954 | NA          | NA |
| ASV_16s_9634 | 0.384918179 | 0.02577353   | 3.549618236 | 1.639039322 | NA          | NA |
| ASV_16s_9635 | 0.120666701 | 0.356712529  | 3.55159983  | 0.44308532  | NA          | NA |
| ASV_16s_9636 | 0.120666701 | 0.356712529  | 3.55159983  | 0.44308532  | NA          | NA |
| ASV_16s_9637 | 0.120666701 | 0.356712529  | 3.55159983  | 0.44308532  | NA          | NA |
| ASV_16s_9638 | 0.236468118 | -0.546680523 | 3.550085533 | 0.657073256 | NA          | NA |
| ASV_16s_9639 | 0.236468118 | -0.546680523 | 3.550085533 | 0.657073256 | NA          | NA |
| ASV_16s_9640 | 0.171800319 | 1.19665311   | 3.550910353 | 0.526904039 | NA          | NA |
| ASV_16s_9641 | 0.234687148 | 0.220025398  | 3.550699946 | 0.85723394  | 0.996815049 | NA |
| ASV_16s_9642 | 0.237185331 | 0.220024393  | 3.550698647 | 0.862548791 | 0.996751997 | NA |
| ASV_16s_9643 | 0.23746806  | 0.22002427   | 3.550698505 | 0.86313165  | 0.996745033 | NA |
| ASV_16s_9644 | 0.364040971 | -0.023010611 | 3.550849352 | 0.54914151  | 0.999245911 | NA |
| ASV_16s_9645 | 0.442796764 | 0.34118977   | 3.549435039 | 1.832910548 | 0.968506889 | NA |
| ASV_16s_9646 | 0.416249345 | 1.129431157  | 3.550092439 | 1.098589812 | 0.993077613 | NA |
| ASV_16s_9647 | 0.347092226 | -0.273347615 | 3.549291605 | 1.390484035 | NA          | NA |
| ASV_16s_9648 | 0.352434008 | -0.06919177  | 3.549974616 | 1.718085689 | 0.973786698 | NA |
| ASV_16s_9649 | 0.348205579 | -0.069106835 | 3.549934062 | 1.720342078 | NA          | NA |
| ASV_16s_9650 | 0.385892591 | 1.013324382  | 3.549260993 | 1.48833782  | NA          | NA |
| ASV_16s_9651 | 0.343641879 | 0.073466211  | 3.551127652 | 0.674823619 | NA          | NA |
| ASV_16s_9652 | 0.351674207 | -0.06897574  | 3.549892574 | 1.730742861 | NA          | NA |
| ASV_16s_9653 | 0.353160762 | -0.068890297 | 3.549889259 | 1.727960183 | NA          | NA |
| ASV_16s_9654 | 0.434469281 | 0.804604477  | 3.550162527 | 1.479595085 | NA          | NA |
| ASV_16s_9655 | 0.346198159 | 0.369799921  | 3.551233008 | 0.84975716  | NA          | NA |
| ASV_16s_9656 | 0.304628144 | 0.235207151  | 3.550623749 | 1.140084056 | NA          | NA |
| ASV_16s_9657 | 0.355396338 | -0.11210333  | 3.55058272  | 1.375768925 | NA          | NA |
| ASV_16s_9658 | 0.232269302 | 0.279715971  | 3.551474687 | 0.743822592 | NA          | NA |
| ASV_16s_9659 | 0.584344485 | -0.144658589 | 3.549512235 | 1.81683902  | 0.969279022 | NA |
| ASV_16s_9660 | 0.499889978 | 0.87477625   | 3.550466414 | 1.275923823 | 0.989072445 | NA |
| ASV_16s_9661 | 0.439460614 | -0.549598739 | 3.54944303  | 0.855204307 | NA          | NA |
| ASV_16s_9662 | 0.436681919 | -0.022572332 | 3.550641346 | 1.434701642 | 0.984484598 | NA |
| ASV_16s_9663 | 0.405684964 | 0.027207733  | 3.550705002 | 1.351441765 | 0.987012355 | NA |
| ASV_16s_9664 | 0.54054071  | 0.12289969   | 3.550092216 | 2.202884417 | NA          | NA |
| ASV_16s_9665 | 0.638778036 | 0.67226793   | 3.549616454 | 2.289266632 | 0.94211289  | NA |
| ASV_16s_9666 | 0.616042786 | 0.148767613  | 3.549090526 | 1.917082849 | 0.964286652 | NA |
| ASV_16s_9667 | 0.408050782 | 0.363300227  | 3.550461441 | 0.979678302 | 0.995149726 | NA |
| ASV_16s_9668 | 0.37149494  | 0.36039128   | 3.550867507 | 1.292529773 | NA          | NA |
| ASV_16s_9669 | 0.37149494  | 0.36039128   | 3.550867507 | 1.292529773 | NA          | NA |
| ASV_16s_9670 | 0.445209967 | 0.547791811  | 3.550679742 | 1.173049301 | 0.99153425  | NA |
| ASV_16s_9671 | 0.513292494 | 0.7348864    | 3.550785484 | 1.39300429  | NA          | NA |
| ASV_16s_9672 | 0.484130925 | 0.693654092  | 3.550705622 | 1.322567428 | 0.987825828 | NA |
| ASV_16s_9673 | 0.46964994  | 0.69363569   | 3.550710344 | 1.307118118 | 0.988247914 | NA |
| ASV_16s_9674 | 0.490735883 | 0.693662943  | 3.550703563 | 1.329448084 | NA          | NA |
| ASV_16s_9675 | 0.440626781 | 0.693601743  | 3.550720728 | 1.274756671 | 0.98910258  | NA |
| ASV_16s_9676 | 0.388012224 | 0.693525261  | 3.550743504 | 1.2102691   | NA          | NA |
| ASV_16s_9677 | 0.337440156 | -0.093518125 | 3.549998008 | 1.597567901 | NA          | NA |
| ASV_16s_9678 | 0.338475832 | -0.130486014 | 3.549964541 | 1.626048051 | NA          | NA |
| ASV_16s_9679 | 0.342197006 | -0.16935395  | 3.54992759  | 1.652123566 | 0.976571355 | NA |
| ASV_16s_9680 | 0.339511507 | -0.166273904 | 3.549937778 | 1.644007176 | NA          | NA |
| ASV_16s_9681 | 0.330654694 | -0.164489342 | 3.549967671 | 1.619060477 | NA          | NA |
| ASV_16s_9682 | 0.340029345 | -0.183873641 | 3.549926596 | 1.649277407 | NA          | NA |
| ASV_16s_9683 | 0.358143585 | -0.251217851 | 3.549848689 | 1.690109433 | 0.974989809 | NA |
| ASV_16s_9684 | 0.350180381 | -0.260805582 | 3.549869314 | 1.6651523   | 0.976035643 | NA |
| ASV_16s_9685 | 0.367222075 | -0.307960627 | 3.549813045 | 1.679456979 | 0.975439364 | NA |
| ASV_16s_9686 | 0.35767138  | -0.300788165 | 3.549840036 | 1.660722069 | 0.976218593 | NA |
| ASV_16s_9687 | 0.354699086 | -0.307115646 | 3.549847488 | 1.648259275 | NA          | NA |
| ASV_16s_9688 | 0.335332345 | -0.356806484 | 3.549903848 | 1.550790366 | 0.980499024 | NA |
| ASV_16s_9689 | 0.340154834 | -0.379510024 | 3.54989073  | 1.536447503 | 0.981020955 | NA |
| ASV_16s_9690 | 0.094775647 | -0.169427302 | 3.550786863 | 0.463273952 | 0.999570156 | NA |
| ASV_16s_9691 | 0.125313078 | 0.220107158  | 3.550807422 | 0.556117063 | 0.99921396  | NA |
| ASV_16s_9692 | 0.34125456  | 0.2644133    | 3.550037391 | 1.463172805 | NA          | NA |
| ASV_16s_9693 | 0.356091751 | 0.021242975  | 3.549761162 | 1.640232372 | 0.977054162 | NA |
| ASV_16s_9694 | 0.334911656 | -0.383375593 | 3.549681947 | 0.939771519 | NA          | NA |
| ASV_16s_9695 | 0.517844238 | 2.114036159  | 3.549039672 | 0.500990339 | 0.999442847 | NA |
| ASV_16s_9696 | 0.339240848 | 0.165903355  | 3.549294767 | 1.755859582 | 0.972110538 | NA |
| ASV_16s_9697 | 0.398018964 | -0.459559269 | 3.549433283 | 1.357429708 | NA          | NA |
| ASV_16s_9698 | 0.428707198 | -0.791366683 | 3.549264336 | 1.403190872 | NA          | NA |
| ASV_16s_9699 | 0.453677692 | -0.791234086 | 3.549209296 | 1.526632011 | 0.981373311 | NA |

|              |             |              |             |              |             |    |
|--------------|-------------|--------------|-------------|--------------|-------------|----|
| ASV_16s_9700 | 0.444704107 | -0.788509652 | 3.549320855 | 1.553812     | NA          | NA |
| ASV_16s_9701 | 0.430620091 | -0.493338146 | 3.550205719 | 1.10778715   | 0.992897497 | NA |
| ASV_16s_9702 | 0.439761965 | -0.839278781 | 3.54938566  | 1.317802879  | 0.987956974 | NA |
| ASV_16s_9703 | 0.406656802 | -0.755120773 | 3.549586413 | 1.528841845  | 0.981294324 | NA |
| ASV_16s_9704 | 0.401403896 | -0.92888378  | 3.54958046  | 1.187569109  | 0.991210305 | NA |
| ASV_16s_9705 | 0.43020408  | -0.729847367 | 3.549642931 | 1.600865506  | 0.978610884 | NA |
| ASV_16s_9706 | 0.424735556 | -0.705663008 | 3.550447631 | 0.831239897  | NA          | NA |
| ASV_16s_9707 | 0.434867992 | -0.790762496 | 3.549544518 | 1.325420578  | 0.987746877 | NA |
| ASV_16s_9708 | 0.448688486 | -0.740192856 | 3.549590791 | 1.6353452    | 0.977250896 | NA |
| ASV_16s_9709 | 0.435036078 | -0.72281588  | 3.549657902 | 1.612983197  | 0.978138507 | NA |
| ASV_16s_9710 | 0.435308525 | -0.707520552 | 3.549701812 | 1.614477114  | 0.978079852 | NA |
| ASV_16s_9711 | 0.377116027 | 1.007808859  | 3.548690666 | 0.785900202  | NA          | NA |
| ASV_16s_9712 | 0.413737898 | -0.601354934 | 3.549989016 | 1.565816382  | NA          | NA |
| ASV_16s_9713 | 0.410903188 | -0.662610989 | 3.549665642 | 1.227654756  | NA          | NA |
| ASV_16s_9714 | 0.467542626 | -0.178185074 | 3.550181176 | 1.728254513  | 0.973341321 | NA |
| ASV_16s_9715 | 0.386182155 | 0.955370259  | 3.549708185 | 1.189989007  | NA          | NA |
| ASV_16s_9716 | 0.410933351 | -1.030113769 | 3.549337536 | 1.270368707  | NA          | NA |
| ASV_16s_9717 | 0.364955176 | 1.555457126  | 3.549413164 | 0.781825697  | NA          | NA |
| ASV_16s_9718 | 0.354891915 | -0.054051043 | 3.550712639 | 1.447176449  | NA          | NA |
| ASV_16s_9719 | 0.669465857 | -0.61657304  | 3.549180089 | 1.207357136  | NA          | NA |
| ASV_16s_9720 | 0.316818863 | -0.558397611 | 3.550051986 | 1.086268777  | NA          | NA |
| ASV_16s_9721 | 0.394222469 | 0.35740111   | 3.551151113 | 0.754740035  | NA          | NA |
| ASV_16s_9722 | 0.255847757 | -0.139340867 | 3.550327109 | 1.048761505  | 0.994003131 | NA |
| ASV_16s_9723 | 0.301663542 | 0.042631584  | 3.550100892 | 1.47054886   | 0.983311777 | NA |
| ASV_16s_9724 | 0.343168459 | -0.795172274 | 3.54931738  | 0.992868932  | 0.994942752 | NA |
| ASV_16s_9725 | 0.404742221 | 0.292701903  | 3.551217783 | 0.345918215  | 0.999838214 | NA |
| ASV_16s_9726 | 0.376778593 | 0.397201436  | 3.551217643 | 0.556906991  | NA          | NA |
| ASV_16s_9727 | 0.399494625 | -0.56529643  | 3.549695353 | 0.895148578  | NA          | NA |
| ASV_16s_9728 | 0.364142786 | -0.940418019 | 3.549649797 | 0.883707125  | NA          | NA |
| ASV_16s_9729 | 0.408254191 | -0.56538287  | 3.549673735 | 0.902120338  | NA          | NA |
| ASV_16s_9730 | 0.266130615 | 1.301729679  | 3.55053578  | 0.67752655   | NA          | NA |
| ASV_16s_9731 | 0.174289306 | 0.380414875  | 3.551308887 | 0.560091013  | NA          | NA |
| ASV_16s_9732 | 0.231868797 | 0.220026661  | 3.550701448 | 0.851158299  | 0.996886141 | NA |
| ASV_16s_9733 | 0.243311796 | 0.220022213  | 3.550695575 | 0.875349544  | NA          | NA |
| ASV_16s_9734 | 0.41080343  | 1.000077398  | 3.549831026 | 1.603424678  | 0.978511625 | NA |
| ASV_16s_9735 | 0.423719356 | 1.880939972  | 3.55008334  | 0.623941111  | 0.998854354 | NA |
| ASV_16s_9736 | 0.497128514 | 1.399335395  | 3.55051139  | 0.712480037  | 0.998237998 | NA |
| ASV_16s_9737 | 0.341197561 | -0.069177407 | 3.550019895 | 1.68240473   | NA          | NA |
| ASV_16s_9738 | 0.373564448 | -0.069119055 | 3.549852481 | 1.791979301  | 0.970452109 | NA |
| ASV_16s_9739 | 0.350116891 | -0.06879299  | 3.549903074 | 1.710298969  | NA          | NA |
| ASV_16s_9740 | 0.350116891 | -0.06879299  | 3.549903074 | 1.710298969  | NA          | NA |
| ASV_16s_9741 | 0.402752113 | -6.179317782 | 3.547817687 | -0.844235243 | 1           | NA |
| ASV_16s_9742 | 0.330987694 | 1.339265794  | 3.550576001 | 0.650615923  | NA          | NA |
| ASV_16s_9743 | 0.274487305 | 0.509024216  | 3.550914298 | 1.021631109  | NA          | NA |
| ASV_16s_9744 | 0.499851597 | 1.219294364  | 3.550197644 | 0.92840079   | NA          | NA |
| ASV_16s_9745 | 0.458653831 | 0.359905287  | 3.550699543 | 0.730180178  | NA          | NA |
| ASV_16s_9746 | 0.494226033 | 0.36405198   | 3.550624454 | 0.797982964  | 0.997464483 | NA |
| ASV_16s_9747 | 0.434101338 | -0.549560311 | 3.549452348 | 0.851249384  | NA          | NA |
| ASV_16s_9748 | 0.341820511 | -0.081928502 | 3.550422819 | 1.460371829  | NA          | NA |
| ASV_16s_9749 | 0.653566841 | 0.530425303  | 3.549529146 | 2.296469266  | 0.941628307 | NA |
| ASV_16s_9750 | 0.420935217 | 0.36265404   | 3.550461089 | 0.99480435   | 0.994911915 | NA |
| ASV_16s_9751 | 0.403642367 | 0.363416135  | 3.550399508 | 0.98075137   | 0.995133096 | NA |
| ASV_16s_9752 | 0.477888973 | 0.338370427  | 3.550716502 | 1.140232846  | 0.992238559 | NA |
| ASV_16s_9753 | 0.41628794  | 0.315939389  | 3.550759838 | 1.311279716  | 0.988135115 | NA |
| ASV_16s_9754 | 0.421205044 | 0.315939388  | 3.550757827 | 1.317245449  | 0.98797226  | NA |
| ASV_16s_9755 | 0.401758242 | 0.715071482  | 3.550475273 | 1.493887886  | 0.982520507 | NA |
| ASV_16s_9756 | 0.460783216 | 0.315939382  | 3.550743218 | 1.362749308  | 0.986684996 | NA |
| ASV_16s_9757 | 0.251161584 | 0.734133609  | 3.551003307 | 1.031240509  | NA          | NA |
| ASV_16s_9758 | 0.463713317 | 0.693631126  | 3.550712365 | 1.300645302  | 0.988422044 | NA |
| ASV_16s_9759 | 0.562040261 | 0.693729391  | 3.550684406 | 1.398342171  | NA          | NA |
| ASV_16s_9760 | 0.168852944 | 1.091682043  | 3.55127829  | 0.447575047  | 0.999616703 | NA |
| ASV_16s_9761 | 0.326460991 | 0.025862748  | 3.550180462 | 1.398642545  | NA          | NA |
| ASV_16s_9762 | 0.33206594  | -0.047527588 | 3.550062887 | 1.534687571  | NA          | NA |
| ASV_16s_9763 | 0.326552256 | -0.132598386 | 3.550003101 | 1.594280944  | NA          | NA |
| ASV_16s_9764 | 0.332905442 | -0.175842262 | 3.54995373  | 1.628105379  | NA          | NA |
| ASV_16s_9765 | 0.326580776 | -0.177272712 | 3.549974113 | 1.610686588  | NA          | NA |
| ASV_16s_9766 | 0.332444645 | -0.244757033 | 3.54992742  | 1.623100424  | 0.977739481 | NA |



|              |             |              |             |             |             |    |
|--------------|-------------|--------------|-------------|-------------|-------------|----|
| ASV_16s_9767 | 0.331690704 | -0.252798869 | 3.549927871 | 1.618197106 | 0.977933396 | NA |
| ASV_16s_9768 | 0.354934742 | -0.307283241 | 3.549846826 | 1.648683037 | 0.976711649 | NA |
| ASV_16s_9769 | 0.339986857 | -0.322608465 | 3.549889521 | 1.596784965 | 0.978768594 | NA |
| ASV_16s_9770 | 0.332237062 | -0.316608714 | 3.549914498 | 1.581171852 | 0.979365714 | NA |
| ASV_16s_9771 | 0.331742041 | -0.335043195 | 3.549915079 | 1.563476912 | 0.980030372 | NA |
| ASV_16s_9772 | 0.354115396 | -0.369309358 | 3.549847788 | 1.584212731 | 0.979250201 | NA |
| ASV_16s_9773 | 0.366861243 | -0.434234487 | 3.549824054 | 1.506190978 | 0.982094554 | NA |
| ASV_16s_9774 | 0.116673247 | -0.464256799 | 3.551286955 | 0.511056422 | NA          | NA |
| ASV_16s_9775 | 0.47000973  | -0.682672749 | 3.549684299 | 0.969890743 | NA          | NA |
| ASV_16s_9776 | 0.326826051 | -0.680832486 | 3.550096708 | 0.853069925 | NA          | NA |
| ASV_16s_9777 | 0.054120921 | 0.588012567  | 3.551969716 | 0.177302855 | 0.999983352 | NA |
| ASV_16s_9778 | 0.062739207 | -0.168860611 | 3.550929128 | 0.309949481 | NA          | NA |
| ASV_16s_9779 | 0.110819515 | -0.169589347 | 3.55074637  | 0.528700794 | NA          | NA |
| ASV_16s_9781 | 0.355502755 | 0.007332286  | 3.549819372 | 1.6445215   | 0.976880689 | NA |
| ASV_16s_9782 | 0.299060455 | -0.209458571 | 3.549384521 | 1.11443993  | 0.992765384 | NA |
| ASV_16s_9783 | 0.35959496  | -0.017903938 | 3.549303497 | 1.622093617 | 0.977779379 | NA |
| ASV_16s_9784 | 0.393086922 | -0.502031056 | 3.549599644 | 1.449305017 | 0.984013011 | NA |
| ASV_16s_9785 | 0.363579401 | -0.062251804 | 3.549320742 | 1.571062126 | 0.979747026 | NA |
| ASV_16s_9786 | 0.342817657 | 0.177091631  | 3.54936333  | 1.783111736 | 0.970864306 | NA |
| ASV_16s_9787 | 0.340433461 | 0.840151251  | 3.549606942 | 1.380675248 | 0.986155823 | NA |
| ASV_16s_9788 | 0.37943489  | -0.526119997 | 3.549236855 | 1.11073424  | 0.992839163 | NA |
| ASV_16s_9789 | 0.365068864 | -0.122973893 | 3.549687658 | 1.32383264  | NA          | NA |
| ASV_16s_9790 | 0.353186498 | 0.142277931  | 3.549264598 | 1.848371742 | NA          | NA |
| ASV_16s_9791 | 0.433865453 | -0.789265197 | 3.549331123 | 1.515923265 | 0.981753271 | NA |
| ASV_16s_9792 | 0.404539642 | -0.782810289 | 3.549445214 | 1.457219312 | NA          | NA |
| ASV_16s_9793 | 0.437737582 | -0.781417008 | 3.549389609 | 1.561195103 | NA          | NA |
| ASV_16s_9794 | 0.438209688 | -0.77842226  | 3.54941104  | 1.570828951 | 0.979755771 | NA |
| ASV_16s_9795 | 0.272086313 | 1.132572855  | 3.550729195 | 0.854690012 | NA          | NA |
| ASV_16s_9796 | 0.413574204 | -0.741379148 | 3.549622155 | 1.557345643 | 0.980257687 | NA |
| ASV_16s_9797 | 0.416268732 | -0.753947671 | 3.549578207 | 1.554135906 | 0.980376075 | NA |
| ASV_16s_9798 | 0.416266667 | -0.727298466 | 3.549663583 | 1.570847003 | 0.979755094 | NA |
| ASV_16s_9799 | 0.392681996 | -1.261527288 | 3.549504922 | 0.691929064 | 0.998396984 | NA |
| ASV_16s_9800 | 0.376114756 | -0.822761417 | 3.549924777 | 1.27102088  | 0.989198692 | NA |
| ASV_16s_9801 | 0.39302605  | -0.760928896 | 3.549000497 | 1.120269    | NA          | NA |
| ASV_16s_9802 | 0.42007889  | 0.678367906  | 3.550761422 | 1.381326361 | 0.986136366 | NA |
| ASV_16s_9803 | 0.411040517 | 0.218975333  | 3.549421693 | 1.44701181  | NA          | NA |
| ASV_16s_9804 | 0.376400487 | 0.074818925  | 3.550710168 | 1.517989048 | NA          | NA |
| ASV_16s_9805 | 0.355622328 | -0.074579136 | 3.550345705 | 1.426108502 | NA          | NA |
| ASV_16s_9806 | 0.296849628 | 1.835857544  | 3.550430164 | 0.443423854 | 0.999628408 | NA |
| ASV_16s_9807 | 0.272574446 | 0.48592002   | 3.549639403 | 0.855000003 | NA          | NA |
| ASV_16s_9808 | 0.274445284 | 0.393143338  | 3.551067556 | 0.778152681 | NA          | NA |
| ASV_16s_9809 | 0.274445284 | 0.393143338  | 3.551067556 | 0.778152681 | NA          | NA |
| ASV_16s_9810 | 0.477711699 | -0.565958359 | 3.549530208 | 0.952635888 | NA          | NA |
| ASV_16s_9811 | 0.459201457 | -0.565822009 | 3.549564251 | 0.939922912 | NA          | NA |
| ASV_16s_9812 | 0.329470851 | 0.630059545  | 3.550108265 | 1.256931275 | NA          | NA |
| ASV_16s_9813 | 0.117723611 | 0.355235682  | 3.551612875 | 0.435579775 | NA          | NA |
| ASV_16s_9814 | 0.117723611 | 0.355235682  | 3.551612875 | 0.435579775 | NA          | NA |
| ASV_16s_9815 | 0.117723611 | 0.355235682  | 3.551612875 | 0.435579775 | NA          | NA |
| ASV_16s_9816 | 0.189958798 | -0.537317605 | 3.550406626 | 0.587585029 | NA          | NA |
| ASV_16s_9817 | 0.292999033 | -0.822989584 | 3.549888038 | 0.911542085 | NA          | NA |
| ASV_16s_9818 | 0.22533639  | 0.220029427  | 3.550705069 | 0.836821112 | 0.997049771 | NA |
| ASV_16s_9819 | 0.22863746  | 0.220027914  | 3.550703214 | 0.844106895 | 0.99696734  | NA |
| ASV_16s_9820 | 0.233112413 | 0.220026172  | 3.550700783 | 0.853826453 | 0.996855049 | NA |
| ASV_16s_9821 | 0.345266662 | -0.446819231 | 3.549744952 | 1.009656763 | 0.994671252 | NA |
| ASV_16s_9822 | 0.315191697 | 0.663630378  | 3.550027648 | 1.393754072 | NA          | NA |
| ASV_16s_9823 | 0.319269222 | 0.695902111  | 3.551073763 | 0.709081223 | NA          | NA |
| ASV_16s_9824 | 0.343162009 | 1.259927947  | 3.550476323 | 1.047711073 | NA          | NA |
| ASV_16s_9825 | 0.348823506 | 0.700450031  | 3.549630767 | 1.283261829 | NA          | NA |
| ASV_16s_9826 | 0.342613355 | -0.068968149 | 3.54991549  | 1.706747427 | NA          | NA |
| ASV_16s_9827 | 0.624474094 | -0.723291136 | 3.549079663 | 1.449458661 | NA          | NA |
| ASV_16s_9828 | 0.315296932 | -0.09415571  | 3.549870833 | 1.317570903 | NA          | NA |
| ASV_16s_9829 | 0.310459799 | -0.05415394  | 3.550488317 | 1.330860828 | NA          | NA |
| ASV_16s_9830 | 0.491732032 | 0.713121268  | 3.549824948 | 1.847594648 | NA          | NA |
| ASV_16s_9831 | 0.097639776 | 0.284733396  | 3.551752412 | 0.446443534 | NA          | NA |
| ASV_16s_9832 | 0.439010171 | 1.387844308  | 3.549790799 | 1.567717635 | NA          | NA |
| ASV_16s_9833 | 0.270894943 | -0.078956102 | 3.550716287 | 1.089338608 | NA          | NA |
| ASV_16s_9834 | 0.358729195 | -0.030220611 | 3.550747669 | 1.345610154 | NA          | NA |

|              |             |              |             |             |             |    |
|--------------|-------------|--------------|-------------|-------------|-------------|----|
| ASV_16s_9835 | 0.405793682 | 0.255171884  | 3.550741391 | 2.235504797 | NA          | NA |
| ASV_16s_9836 | 0.4543018   | 0.663863747  | 3.549779962 | 1.836144109 | NA          | NA |
| ASV_16s_9837 | 0.405083886 | 0.315939409  | 3.550764602 | 1.297419462 | 0.988508228 | NA |
| ASV_16s_9838 | 0.43168326  | 0.315939351  | 3.550753702 | 1.329671539 | 0.987628667 | NA |
| ASV_16s_9839 | 0.390183163 | 0.315939413  | 3.550771356 | 1.278408443 | 0.989008123 | NA |
| ASV_16s_9840 | 0.512061093 | 1.068762704  | 3.55069947  | 1.14768298  | NA          | NA |
| ASV_16s_9841 | 0.500773165 | 0.734868401  | 3.550790725 | 1.380430343 | NA          | NA |
| ASV_16s_9842 | 0.442329684 | 0.693604771  | 3.550720085 | 1.276687129 | 0.989052709 | NA |
| ASV_16s_9843 | 0.454594976 | 0.693620385  | 3.550715567 | 1.290571468 | 0.988689875 | NA |
| ASV_16s_9844 | 0.422672625 | 0.69357787   | 3.550727872 | 1.253599971 | 0.989639958 | NA |
| ASV_16s_9845 | 0.375862226 | -0.142455492 | 3.549847527 | 1.721568641 | NA          | NA |
| ASV_16s_9846 | 0.346423992 | -0.190741032 | 3.549903654 | 1.666489736 | NA          | NA |
| ASV_16s_9847 | 0.322495451 | -0.172423243 | 3.549990991 | 1.598008069 | NA          | NA |
| ASV_16s_9848 | 0.322518267 | -0.20818442  | 3.549973061 | 1.601548996 | NA          | NA |
| ASV_16s_9849 | 0.332646858 | -0.218852566 | 3.549934941 | 1.629310903 | NA          | NA |
| ASV_16s_9850 | 0.387540792 | -0.274930813 | 3.549768313 | 1.752665882 | 0.972254556 | NA |
| ASV_16s_9851 | 0.332905777 | -0.227791876 | 3.549930991 | 1.628645262 | NA          | NA |
| ASV_16s_9852 | 0.346481033 | -0.274538578 | 3.549877538 | 1.64827675  | 0.976728184 | NA |
| ASV_16s_9853 | 0.322552491 | -0.26210991  | 3.549956376 | 1.588669394 | NA          | NA |
| ASV_16s_9854 | 0.328658166 | -0.313740635 | 3.549926496 | 1.573721178 | 0.979647139 | NA |
| ASV_16s_9855 | 0.329941352 | -0.34327442  | 3.549920954 | 1.550605716 | 0.980505797 | NA |
| ASV_16s_9856 | 0.342863381 | -0.361945609 | 3.549880672 | 1.564445111 | 0.979994336 | NA |
| ASV_16s_9857 | 0.115214832 | -0.459958099 | 3.551298706 | 0.507063987 | NA          | NA |
| ASV_16s_9858 | 0.115214832 | -0.459958099 | 3.551298706 | 0.507063987 | NA          | NA |
| ASV_16s_9859 | 0.115214832 | -0.459958099 | 3.551298706 | 0.507063987 | NA          | NA |
| ASV_16s_9860 | 0.322740725 | -0.680749957 | 3.550113814 | 0.849019195 | NA          | NA |
| ASV_16s_9862 | 0.336228306 | -0.210558495 | 3.550126364 | 1.379694594 | 0.986185097 | NA |
| ASV_16s_9863 | 0.359113971 | 0.05407624   | 3.549438755 | 1.674177178 | 0.975660436 | NA |
| ASV_16s_9864 | 0.328241109 | -0.349688135 | 3.549574931 | 1.002067936 | NA          | NA |
| ASV_16s_9865 | 0.3319396   | -0.057842272 | 3.549327726 | 1.521429209 | NA          | NA |
| ASV_16s_9866 | 0.390925305 | -0.583465752 | 3.549566148 | 1.422151711 | NA          | NA |
| ASV_16s_9867 | 0.337759274 | -0.24810644  | 3.549670422 | 1.075020646 | NA          | NA |
| ASV_16s_9868 | 0.445982159 | -0.791669069 | 3.549188851 | 1.432267895 | 0.984562366 | NA |
| ASV_16s_9869 | 0.411576873 | -0.791079919 | 3.549344015 | 1.378204438 | 0.986229507 | NA |
| ASV_16s_9870 | 0.383083086 | 0.395495829  | 3.548988843 | 1.478590137 | 0.983041625 | NA |
| ASV_16s_9871 | 0.440879988 | -0.790810703 | 3.549292915 | 1.522513803 | 0.981519981 | NA |
| ASV_16s_9872 | 0.426898756 | -0.78771362  | 3.549364658 | 1.505933932 | 0.982103516 | NA |
| ASV_16s_9873 | 0.399244063 | 0.491738993  | 3.549082958 | 1.784705452 | 0.970790467 | NA |
| ASV_16s_9874 | 0.340269391 | -0.232656333 | 3.550347951 | 1.289387191 | NA          | NA |
| ASV_16s_9875 | 0.456359779 | -0.788896998 | 3.549295775 | 1.583553126 | 0.979275289 | NA |
| ASV_16s_9876 | 0.402501194 | -0.767988428 | 3.549523608 | 1.494530613 | 0.982498406 | NA |
| ASV_16s_9877 | 0.395233745 | -0.777277185 | 3.549643943 | 1.506381389 | 0.982087914 | NA |
| ASV_16s_9878 | 0.424071801 | -0.743976363 | 3.549601574 | 1.580407934 | 0.979394673 | NA |
| ASV_16s_9879 | 0.384657123 | 1.903855211  | 3.549625739 | 0.801479802 | NA          | NA |
| ASV_16s_9880 | 0.237304208 | 0.216153961  | 3.549973336 | 0.788768757 | NA          | NA |
| ASV_16s_9881 | 0.347593514 | -0.318865728 | 3.550362847 | 1.35474533  | NA          | NA |
| ASV_16s_9882 | 0.386584131 | -0.040672247 | 3.550290071 | 1.374125904 | 0.986350614 | NA |
| ASV_16s_9883 | 0.436775649 | -0.677990239 | 3.549792091 | 1.613303382 | 0.978125944 | NA |
| ASV_16s_9884 | 0.31850525  | -1.364667675 | 3.549331121 | 0.726457498 | 0.998124088 | NA |
| ASV_16s_9885 | 0.41316122  | 0.182696631  | 3.549430672 | 1.592589407 | NA          | NA |
| ASV_16s_9886 | 0.436164465 | -0.649057087 | 3.549859759 | 1.611251513 | 0.978206383 | NA |
| ASV_16s_9887 | 0.427413153 | -0.578002015 | 3.550034271 | 1.592005818 | 0.978952434 | NA |
| ASV_16s_9888 | 0.397920694 | 0.34397227   | 3.55115112  | 0.83981597  | NA          | NA |
| ASV_16s_9889 | 0.394792779 | 0.207666542  | 3.54931271  | 1.63387248  | 0.977309987 | NA |
| ASV_16s_9890 | 0.360631323 | -0.08106978  | 3.550436605 | 1.374296056 | NA          | NA |
| ASV_16s_9891 | 0.429650079 | 1.353798157  | 3.549269366 | 0.72061997  | NA          | NA |
| ASV_16s_9892 | 0.494089398 | 0.345848954  | 3.550124617 | 1.630412614 | 0.977448458 | NA |
| ASV_16s_9893 | 0.363954165 | 0.772783463  | 3.54961645  | 0.87794459  | NA          | NA |
| ASV_16s_9894 | 0.521209757 | 1.522937789  | 3.549450893 | 1.302912976 | NA          | NA |
| ASV_16s_9895 | 0.271014718 | 0.392515687  | 3.551088262 | 0.773975918 | NA          | NA |
| ASV_16s_9896 | 0.5411868   | -0.566357983 | 3.549430512 | 0.99301206  | NA          | NA |
| ASV_16s_9897 | 0.38963056  | -0.564838136 | 3.549720852 | 0.887045454 | NA          | NA |
| ASV_16s_9898 | 0.22022778  | -0.726593476 | 3.550677514 | 0.746494563 | NA          | NA |
| ASV_16s_9899 | 0.209437747 | 1.24994003   | 3.550748447 | 0.594757537 | NA          | NA |
| ASV_16s_9900 | 0.434575537 | 0.65209671   | 3.549516561 | 1.616556287 | 0.977998066 | NA |
| ASV_16s_9901 | 0.354717141 | 0.448161186  | 3.549056866 | 1.316280037 | 0.987998707 | NA |
| ASV_16s_9902 | 0.382101619 | -0.02012784  | 3.549591042 | 1.664921308 | NA          | NA |

|              |             |              |             |             |             |    |
|--------------|-------------|--------------|-------------|-------------|-------------|----|
| ASV_16s_9903 | 0.116252066 | 0.354491121  | 3.551619528 | 0.431782802 | NA          | NA |
| ASV_16s_9904 | 0.373816655 | -0.079143741 | 3.550660783 | 1.252209743 | NA          | NA |
| ASV_16s_9905 | 0.227101419 | 0.220028577  | 3.550704072 | 0.840713396 | 0.997005919 | NA |
| ASV_16s_9906 | 0.36194137  | 0.721578611  | 3.551222961 | 0.628732517 | NA          | NA |
| ASV_16s_9907 | 0.411826289 | -1.328390621 | 3.549315147 | 0.820400217 | NA          | NA |
| ASV_16s_9908 | 0.321730824 | -0.066774213 | 3.55062613  | 1.275736295 | NA          | NA |
| ASV_16s_9909 | 0.407607745 | 0.189934362  | 3.549560979 | 1.306471616 | 0.988265377 | NA |
| ASV_16s_9910 | 0.334118782 | -0.069122539 | 3.549998837 | 1.67345508  | NA          | NA |
| ASV_16s_9911 | 0.336100855 | -0.069037956 | 3.549953591 | 1.688086098 | NA          | NA |
| ASV_16s_9912 | 0.472119122 | 2.245377908  | 3.549121065 | 0.402964306 | 0.999729973 | NA |
| ASV_16s_9913 | 0.434189822 | 0.060434094  | 3.549630737 | 2.514196962 | 0.926024231 | NA |
| ASV_16s_9914 | 0.507038554 | 0.068096983  | 3.549028049 | 1.976925853 | NA          | NA |
| ASV_16s_9915 | 0.347289975 | 0.388108104  | 3.551062411 | 0.83520592  | NA          | NA |
| ASV_16s_9916 | 0.558255967 | 0.299136359  | 3.547905001 | 1.588120237 | 0.97910121  | NA |
| ASV_16s_9917 | 0.193771244 | 0.279461386  | 3.551556725 | 0.677868547 | NA          | NA |
| ASV_16s_9918 | 0.223771645 | 0.279663084  | 3.551490965 | 0.73013931  | NA          | NA |
| ASV_16s_9919 | 0.628952632 | 0.21696583   | 3.548069704 | 1.538694185 | 0.980939753 | NA |
| ASV_16s_9920 | 0.410369168 | 0.321581589  | 3.55080949  | 1.016889749 | 0.994551461 | NA |
| ASV_16s_9921 | 0.483667984 | 2.085355873  | 3.549376648 | 0.514226279 | NA          | NA |
| ASV_16s_9922 | 0.446511946 | 1.28384061   | 3.54975892  | 1.553084577 | 0.980414761 | NA |
| ASV_16s_9923 | 0.413745569 | 1.100228     | 3.550159911 | 1.428399787 | 0.984685483 | NA |
| ASV_16s_9924 | 0.352940309 | -0.029296561 | 3.550749606 | 1.282302737 | NA          | NA |
| ASV_16s_9925 | 0.357903661 | 0.360388121  | 3.550877882 | 1.273575094 | NA          | NA |
| ASV_16s_9926 | 0.432771776 | 0.315939365  | 3.550753289 | 1.330917517 | 0.987593887 | NA |
| ASV_16s_9927 | 0.418233833 | 0.315939355  | 3.550759044 | 1.313587475 | 0.988072278 | NA |
| ASV_16s_9928 | 0.418010622 | 0.315939341  | 3.550759136 | 1.313317389 | 0.988079643 | NA |
| ASV_16s_9929 | 0.384082524 | 0.31593943   | 3.550774275 | 1.270396107 | 0.989214714 | NA |
| ASV_16s_9930 | 0.458917996 | 0.315939267  | 3.550743854 | 1.360654991 | 0.986746002 | NA |
| ASV_16s_9931 | 0.468488909 | 0.693637361  | 3.550710737 | 1.305845473 | 0.988282276 | NA |
| ASV_16s_9932 | 0.438738088 | 0.693600315  | 3.55072146  | 1.272513489 | 0.989160354 | NA |
| ASV_16s_9933 | 0.49702092  | 0.693666598  | 3.550701662 | 1.335836106 | 0.987456006 | NA |
| ASV_16s_9934 | 0.355423714 | -0.117947797 | 3.549921406 | 1.652399799 | NA          | NA |
| ASV_16s_9935 | 0.32266344  | -0.089976261 | 3.550053047 | 1.554109963 | NA          | NA |
| ASV_16s_9936 | 0.318421533 | -0.185600725 | 3.549998181 | 1.588624389 | NA          | NA |
| ASV_16s_9937 | 0.324532912 | -0.245982308 | 3.549953364 | 1.600372799 | 0.978629963 | NA |
| ASV_16s_9938 | 0.318495686 | -0.305317767 | 3.549962116 | 1.55193603  | NA          | NA |
| ASV_16s_9939 | 0.336430468 | -0.347967484 | 3.549900109 | 1.562967271 | 0.980049326 | NA |
| ASV_16s_9940 | 0.365547888 | -0.394835086 | 3.549819    | 1.578191888 | 0.979478546 | NA |
| ASV_16s_9941 | 0.322834562 | -0.367873114 | 3.54994639  | 1.505114867 | 0.982132055 | NA |
| ASV_16s_9942 | 0.413530968 | -0.437085672 | 3.549710854 | 1.610916045 | 0.978219518 | NA |
| ASV_16s_9943 | 0.3186554   | -0.680671422 | 3.550131358 | 0.844917978 | NA          | NA |
| ASV_16s_9944 | 0.090053995 | -0.169369616 | 3.550801503 | 0.442759914 | NA          | NA |
| ASV_16s_9945 | 0.206262832 | 0.22003849   | 3.550716949 | 0.792688176 | NA          | NA |
| ASV_16s_9946 | 0.125269642 | 0.321788999  | 3.550781873 | 0.825457782 | NA          | NA |
| ASV_16s_9947 | 0.354438669 | 0.226125974  | 3.549655747 | 1.68916307  | NA          | NA |
| ASV_16s_9948 | 0.363360286 | 0.049414182  | 3.549302115 | 1.712609859 | 0.974024747 | NA |
| ASV_16s_9949 | 0.404518831 | -0.695683088 | 3.549967753 | 1.027801117 | 0.994367512 | NA |
| ASV_16s_9950 | 0.326558989 | 0.010390404  | 3.549325896 | 1.604435567 | NA          | NA |
| ASV_16s_9951 | 0.333287865 | 0.834189683  | 3.549651614 | 1.397875935 | NA          | NA |
| ASV_16s_9952 | 0.397559364 | -0.791208768 | 3.549426015 | 1.276245535 | 0.98906413  | NA |
| ASV_16s_9953 | 0.410632204 | -0.790995164 | 3.549352409 | 1.379460089 | NA          | NA |
| ASV_16s_9954 | 0.338908098 | 0.264574336  | 3.549369673 | 1.796875452 | NA          | NA |
| ASV_16s_9955 | 0.371707287 | -0.314339466 | 3.549291712 | 1.355577477 | NA          | NA |
| ASV_16s_9956 | 0.3630446   | -0.070665875 | 3.549178613 | 1.667613673 | NA          | NA |
| ASV_16s_9957 | 0.377606151 | 0.043920586  | 3.549164061 | 1.850343145 | 0.967657159 | NA |
| ASV_16s_9958 | 0.46091655  | 2.067315077  | 3.549235809 | 0.473559647 | 0.999537652 | NA |
| ASV_16s_9959 | 0.420847428 | -0.782876627 | 3.549408639 | 1.507638569 | 0.982044034 | NA |
| ASV_16s_9960 | 0.417904739 | -0.772082957 | 3.549475572 | 1.529209104 | 0.981281178 | NA |
| ASV_16s_9961 | 0.246257119 | 0.001138364  | 3.549128836 | 1.112583964 | NA          | NA |
| ASV_16s_9962 | 0.411528159 | -0.774588683 | 3.549620029 | 1.552246072 | 0.980445583 | NA |
| ASV_16s_9963 | 0.404775213 | -0.737843366 | 3.549910477 | 1.161082323 | 0.991795538 | NA |
| ASV_16s_9964 | 0.409207448 | 0.19011616   | 3.54954259  | 1.611437773 | NA          | NA |
| ASV_16s_9965 | 0.353551789 | -0.623489752 | 3.550837289 | 0.823404869 | NA          | NA |
| ASV_16s_9966 | 0.415172666 | -0.009133363 | 3.549750504 | 1.759954439 | 0.971925261 | NA |
| ASV_16s_9967 | 0.417604089 | -0.663406411 | 3.549839067 | 1.578618386 | 0.979462419 | NA |
| ASV_16s_9968 | 0.363219596 | 0.683252112  | 3.550738767 | 1.384685663 | 0.986035716 | NA |
| ASV_16s_9969 | 0.460213284 | -0.477581543 | 3.32543305  | 1.640340567 | 0.977049795 | NA |

|               |             |              |             |             |             |    |
|---------------|-------------|--------------|-------------|-------------|-------------|----|
| ASV_16s_9970  | 0.336128726 | -0.771968938 | 3.550031534 | 1.125244224 | 0.992547544 | NA |
| ASV_16s_9971  | 0.396483024 | -0.473159806 | 3.550274166 | 1.46717835  | 0.98342424  | NA |
| ASV_16s_9972  | 0.407181254 | 0.242725062  | 3.549474598 | 1.567716794 | NA          | NA |
| ASV_16s_9973  | 0.383888403 | 0.182165256  | 3.54959359  | 1.331883336 | 0.987566886 | NA |
| ASV_16s_9974  | 0.377746653 | 1.075090839  | 3.550084315 | 0.863126752 | 0.996745092 | NA |
| ASV_16s_9975  | 0.351594342 | 0.219093197  | 3.549322803 | 1.50159686  | 0.982254325 | NA |
| ASV_16s_9976  | 0.370159166 | -0.072453753 | 3.550379614 | 1.204619537 | NA          | NA |
| ASV_16s_9977  | 0.451125716 | 0.054325727  | 3.549862643 | 1.613561949 | 0.978115795 | NA |
| ASV_16s_9978  | 0.391709455 | 0.496884112  | 3.549349476 | 1.658018376 | NA          | NA |
| ASV_16s_9979  | 0.345296486 | 0.403212399  | 3.550715597 | 0.853920167 | NA          | NA |
| ASV_16s_9980  | 0.379275886 | 0.020445187  | 3.549820075 | 1.680562884 | NA          | NA |
| ASV_16s_9981  | 0.301057406 | 0.249537009  | 3.550290102 | 1.08922413  | NA          | NA |
| ASV_16s_9982  | 0.373883987 | 0.959296511  | 3.550591405 | 1.000808501 | 0.994815484 | NA |
| ASV_16s_9983  | 0.282400747 | -0.018607244 | 3.54970486  | 0.919222144 | NA          | NA |
| ASV_16s_9984  | 0.262694288 | 1.744903156  | 3.550306312 | 0.431664735 | NA          | NA |
| ASV_16s_9985  | 0.354505141 | 1.335915602  | 3.550235405 | 0.773609264 | NA          | NA |
| ASV_16s_9986  | 0.329647706 | 0.418854117  | 3.550442743 | 0.769767055 | NA          | NA |
| ASV_16s_9987  | 0.224933088 | -0.545019741 | 3.550154225 | 0.641046871 | NA          | NA |
| ASV_16s_9988  | 0.321968392 | -0.079063663 | 3.550684324 | 1.176548972 | 0.991456866 | NA |
| ASV_16s_9989  | 0.222168333 | 0.220030846  | 3.550706904 | 0.829704106 | 0.997128864 | NA |
| ASV_16s_9990  | 0.234300248 | 0.220025727  | 3.550700157 | 0.856346829 | NA          | NA |
| ASV_16s_9991  | 0.325596749 | 0.218365277  | 3.549314982 | 1.536935713 | NA          | NA |
| ASV_16s_9992  | 0.367827408 | 0.619548309  | 3.549864529 | 1.439006894 | NA          | NA |
| ASV_16s_9993  | 0.346435979 | -0.060855956 | 3.550329612 | 1.485826294 | NA          | NA |
| ASV_16s_9994  | 0.265131766 | 0.492214413  | 3.550914749 | 0.99154052  | NA          | NA |
| ASV_16s_9995  | 0.60899021  | -0.202239734 | 3.548411792 | 1.711434245 | NA          | NA |
| ASV_16s_9996  | 0.362412596 | -0.081909366 | 3.550463703 | 1.216948566 | NA          | NA |
| ASV_16s_9997  | 0.551418396 | 0.859435825  | 3.550537397 | 1.509878935 | 0.98196568  | NA |
| ASV_16s_9998  | 0.420794925 | 0.770573971  | 3.549968735 | 1.851226673 | 0.967613754 | NA |
| ASV_16s_9999  | 0.4282184   | 0.34466526   | 3.55068373  | 1.051351128 | 0.993957098 | NA |
| ASV_16s_10000 | 0.395052661 | 0.770636584  | 3.550037041 | 1.788225523 | 0.970626999 | NA |
| ASV_16s_10001 | 0.411197908 | 0.315939435  | 3.550761976 | 1.304984145 | 0.988305498 | NA |
| ASV_16s_10002 | 0.378666276 | 0.315939447  | 3.550776946 | 1.263173939 | 0.989398861 | NA |
| ASV_16s_10003 | 0.378666276 | 0.315939447  | 3.550776946 | 1.263173939 | 0.989398861 | NA |
| ASV_16s_10004 | 0.395144475 | 0.315939295  | 3.550769059 | 1.284752754 | 0.988842821 | NA |
| ASV_16s_10005 | 0.531524229 | 1.180354214  | 3.549940844 | 1.026293552 | NA          | NA |
| ASV_16s_10006 | 0.241859303 | 0.734076717  | 3.551019663 | 1.012311498 | NA          | NA |
| ASV_16s_10007 | 0.241859303 | 0.734076717  | 3.551019663 | 1.012311498 | NA          | NA |
| ASV_16s_10008 | 0.460687961 | 0.693628327  | 3.550713416 | 1.297304959 | 0.98851128  | NA |
| ASV_16s_10009 | 0.369084799 | 0.693492192  | 3.550753291 | 1.184849674 | NA          | NA |
| ASV_16s_10010 | 0.319309238 | -0.034886034 | 3.55012541  | 1.477157953 | NA          | NA |
| ASV_16s_10011 | 0.321380589 | -0.116270168 | 3.550034426 | 1.56992309  | NA          | NA |
| ASV_16s_10012 | 0.314330503 | -0.171552206 | 3.55002091  | 1.574156794 | NA          | NA |
| ASV_16s_10013 | 0.339109954 | -0.331132967 | 3.549891882 | 1.586592957 | 0.979159519 | NA |
| ASV_16s_10014 | 0.314427473 | -0.331335623 | 3.549974637 | 1.519364181 | NA          | NA |
| ASV_16s_10015 | 0.317719265 | -0.333945561 | 3.549962795 | 1.526166726 | 0.981389917 | NA |
| ASV_16s_10016 | 0.332998261 | -0.219160144 | 3.549613439 | 1.199404501 | 0.990940603 | NA |
| ASV_16s_10017 | 0.321073801 | -0.454321598 | 3.549975605 | 1.346884337 | 0.987142892 | NA |
| ASV_16s_10018 | 0.112298001 | -0.451208914 | 3.551322909 | 0.499013691 | NA          | NA |
| ASV_16s_10019 | 0.314570074 | -0.680599554 | 3.550149355 | 0.840765404 | NA          | NA |
| ASV_16s_10020 | 0.088899456 | -0.169354457 | 3.550805323 | 0.437621176 | NA          | NA |
| ASV_16s_10021 | 0.34121684  | -0.014563805 | 3.549870997 | 1.611130746 | 0.978211112 | NA |
| ASV_16s_10022 | 0.335567063 | -0.084621469 | 3.549858354 | 1.519937317 | 0.981611393 | NA |
| ASV_16s_10023 | 0.329269487 | 0.019520058  | 3.549917175 | 1.50854446  | 0.982012376 | NA |
| ASV_16s_10024 | 0.331680486 | -0.022618233 | 3.549795792 | 1.565027416 | 0.979972644 | NA |
| ASV_16s_10025 | 0.342635127 | 0.091534075  | 3.549590814 | 1.639307071 | 0.977091486 | NA |
| ASV_16s_10026 | 0.336635338 | 0.046564468  | 3.549612867 | 1.607265484 | 0.978362151 | NA |
| ASV_16s_10027 | 0.436552127 | -0.787863245 | 3.549370701 | 1.182873276 | 0.991315905 | NA |
| ASV_16s_10028 | 0.345977141 | -0.715969718 | 3.549794143 | 1.347830997 | 0.987115843 | NA |
| ASV_16s_10029 | 0.334129878 | 0.526665853  | 3.549378691 | 1.513805768 | 0.981827852 | NA |
| ASV_16s_10030 | 0.422648776 | -0.791676305 | 3.549307654 | 1.297060718 | 0.988517788 | NA |
| ASV_16s_10031 | 0.433826863 | -0.771275863 | 3.548986626 | 0.985856014 | NA          | NA |
| ASV_16s_10032 | 0.353903653 | -0.137786972 | 3.549203524 | 1.543558264 | 0.980763245 | NA |
| ASV_16s_10033 | 0.381873817 | -0.611630875 | 3.549506341 | 1.425709533 | NA          | NA |
| ASV_16s_10034 | 0.421204002 | -0.789983634 | 3.549352262 | 1.468890927 | 0.983367154 | NA |
| ASV_16s_10035 | 0.371059147 | 0.172584372  | 3.549273516 | 1.898015822 | NA          | NA |
| ASV_16s_10036 | 0.356983303 | 1.033679797  | 3.549670719 | 0.683642387 | NA          | NA |

|               |             |              |             |             |             |    |
|---------------|-------------|--------------|-------------|-------------|-------------|----|
| ASV_16s_10037 | 0.414260299 | -0.75888474  | 3.54955746  | 1.54333738  | 0.980771281 | NA |
| ASV_16s_10038 | 0.394225116 | -0.748695094 | 3.549625673 | 1.502186288 | 0.982233874 | NA |
| ASV_16s_10039 | 0.404004783 | -0.744153146 | 3.549625315 | 1.531616316 | NA          | NA |
| ASV_16s_10040 | 0.376307312 | -0.232839615 | 3.550269909 | 1.2475724   | 0.98978999  | NA |
| ASV_16s_10041 | 0.401918356 | -0.717111188 | 3.549706334 | 1.540725195 | 0.980866168 | NA |
| ASV_16s_10042 | 0.404646828 | -0.701664021 | 3.549746641 | 1.550371298 | 0.980514393 | NA |
| ASV_16s_10043 | 0.405031506 | -0.727369037 | 3.548535514 | 1.206772435 | 0.990770127 | NA |
| ASV_16s_10044 | 0.443476958 | 0.315972405  | 3.549763941 | 1.92407666  | NA          | NA |
| ASV_16s_10045 | 0.389178642 | -0.673230922 | 3.549842048 | 1.522730289 | 0.981512288 | NA |
| ASV_16s_10046 | 0.372322462 | -0.159579926 | 3.550448199 | 1.257947511 | NA          | NA |
| ASV_16s_10047 | 0.409710713 | -0.283587478 | 3.549546464 | 1.690880735 | 0.974957076 | NA |
| ASV_16s_10048 | 0.3738056   | 0.26335375   | 3.549749211 | 1.698316959 | 0.97464022  | NA |
| ASV_16s_10049 | 0.285884227 | -0.595369894 | 3.550443662 | 0.763092168 | NA          | NA |
| ASV_16s_10050 | 0.450198563 | -0.416702899 | 3.549869488 | 1.150074875 | NA          | NA |
| ASV_16s_10051 | 0.337397043 | 0.374177242  | 3.551363623 | 0.65103122  | NA          | NA |
| ASV_16s_10052 | 0.506932326 | 1.183239768  | 3.550025285 | 1.075758205 | 0.99351216  | NA |
| ASV_16s_10053 | 0.355143254 | -0.076164855 | 3.550364526 | 1.400887329 | 0.985544071 | NA |
| ASV_16s_10054 | 0.421218515 | 0.161844877  | 3.549928912 | 1.54097819  | 0.98085699  | NA |
| ASV_16s_10055 | 0.469652037 | 1.536256265  | 3.549614076 | 1.226465661 | NA          | NA |
| ASV_16s_10056 | 0.401191685 | 0.611022745  | 3.549520466 | 1.975899972 | 0.961162186 | NA |
| ASV_16s_10057 | 0.340869608 | 0.403071627  | 3.550737532 | 0.849730092 | NA          | NA |
| ASV_16s_10058 | 0.316446791 | -0.429416438 | 3.55041375  | 1.101390344 | NA          | NA |
| ASV_16s_10059 | 0.303781383 | -0.070662863 | 3.550294999 | 0.822645675 | 0.99720592  | NA |
| ASV_16s_10060 | 0.279449935 | -0.122981436 | 3.550639865 | 1.001750884 | NA          | NA |
| ASV_16s_10061 | 0.434519161 | -0.579339781 | 3.549504346 | 1.219138322 | NA          | NA |
| ASV_16s_10062 | 0.241431489 | -0.488481076 | 3.550475046 | 1.007777561 | NA          | NA |
| ASV_16s_10063 | 0.113308976 | 0.35297509   | 3.551633224 | 0.424138096 | NA          | NA |
| ASV_16s_10064 | 0.113308976 | 0.35297509   | 3.551633224 | 0.424138096 | NA          | NA |
| ASV_16s_10065 | 0.113308976 | 0.35297509   | 3.551633224 | 0.424138096 | NA          | NA |
| ASV_16s_10066 | 0.182835343 | -0.534282154 | 3.550466691 | 0.575401837 | NA          | NA |
| ASV_16s_10067 | 0.16132469  | 1.178525558  | 3.550962001 | 0.505728856 | NA          | NA |
| ASV_16s_10068 | 0.364352942 | -0.079131179 | 3.550664585 | 1.239176318 | NA          | NA |
| ASV_16s_10069 | 0.310687898 | -0.079042918 | 3.550690485 | 1.158489225 | NA          | NA |
| ASV_16s_10070 | 0.220584304 | 0.220031455  | 3.550707841 | 0.826109347 | 0.997168279 | NA |
| ASV_16s_10071 | 0.231296398 | 0.220026956  | 3.550701763 | 0.849857897 | NA          | NA |
| ASV_16s_10072 | 0.345455034 | -0.051793186 | 3.549832568 | 1.634728769 | 0.977275641 | NA |
| ASV_16s_10073 | 0.316744236 | -0.066833621 | 3.550618134 | 1.292214286 | 0.988646461 | NA |
| ASV_16s_10074 | 0.483123102 | 0.690796343  | 3.550413202 | 1.277667258 | 0.989027335 | NA |
| ASV_16s_10075 | 0.269136681 | -0.764819352 | 3.550777835 | 0.834154199 | NA          | NA |
| ASV_16s_10076 | 0.32803104  | -0.068998591 | 3.549968147 | 1.665532517 | NA          | NA |
| ASV_16s_10077 | 0.328526558 | -0.068979313 | 3.549960708 | 1.66741864  | NA          | NA |
| ASV_16s_10078 | 0.33100415  | -0.068861236 | 3.549941092 | 1.669086815 | NA          | NA |
| ASV_16s_10079 | 0.367639113 | 0.365771278  | 3.549820435 | 1.619427212 | NA          | NA |
| ASV_16s_10080 | 0.285192685 | 0.78043802   | 3.55102381  | 1.225399324 | NA          | NA |
| ASV_16s_10081 | 0.290061721 | 0.750810019  | 3.551108653 | 1.204178397 | NA          | NA |
| ASV_16s_10082 | 0.273970189 | 0.279453537  | 3.551390427 | 0.803994776 | NA          | NA |
| ASV_16s_10083 | 0.412664235 | -0.549396984 | 3.549492029 | 0.834927336 | NA          | NA |
| ASV_16s_10084 | 0.407965012 | 1.180799822  | 3.550108917 | 1.179184506 | NA          | NA |
| ASV_16s_10085 | 0.321106932 | -0.33088744  | 3.550590253 | 0.967043744 | NA          | NA |
| ASV_16s_10086 | 0.451135343 | 0.559520253  | 3.550697742 | 1.867363665 | NA          | NA |
| ASV_16s_10087 | 0.380741185 | 0.342740469  | 3.549824075 | 1.754275601 | NA          | NA |
| ASV_16s_10088 | 0.345221275 | 0.340028112  | 3.549952827 | 1.665186458 | 0.976034229 | NA |
| ASV_16s_10089 | 0.416852259 | 0.721726993  | 3.549317723 | 1.522735789 | NA          | NA |
| ASV_16s_10090 | 0.41995874  | 0.348515652  | 3.550653652 | 1.025328136 | 0.994409545 | NA |
| ASV_16s_10091 | 0.412787391 | 0.348516173  | 3.55066054  | 1.017430199 | 0.994542441 | NA |
| ASV_16s_10092 | 0.348842809 | 0.360385797  | 3.550885245 | 1.26053631  | NA          | NA |
| ASV_16s_10093 | 0.451279266 | 0.315939317  | 3.550746501 | 1.352116224 | 0.986992968 | NA |
| ASV_16s_10094 | 0.39772485  | 0.315939321  | 3.550767881 | 1.288063963 | 0.988755942 | NA |
| ASV_16s_10095 | 0.388046526 | 0.315939322  | 3.550772375 | 1.275564272 | 0.989081734 | NA |
| ASV_16s_10096 | 0.407520323 | 0.315939376  | 3.550763555 | 1.300379438 | 0.988429162 | NA |
| ASV_16s_10097 | 0.404108547 | 0.464737098  | 3.550746749 | 2.174856241 | 0.949531728 | NA |
| ASV_16s_10098 | 0.364352942 | 0.315939466  | 3.55078438  | 1.243612987 | NA          | NA |
| ASV_16s_10099 | 0.364352942 | 0.410084791  | 3.550767463 | 1.934584944 | NA          | NA |
| ASV_16s_10100 | 0.3469868   | 0.688285284  | 3.55074592  | 1.128862167 | NA          | NA |
| ASV_16s_10101 | 0.524565021 | 1.180092191  | 3.550004705 | 1.036101151 | 0.994224964 | NA |
| ASV_16s_10102 | 0.508159515 | 0.734878648  | 3.550787614 | 1.387808048 | 0.985941768 | NA |
| ASV_16s_10103 | 0.481994171 | 0.734838696  | 3.550799096 | 1.360968738 | NA          | NA |

|               |             |              |             |             |             |    |
|---------------|-------------|--------------|-------------|-------------|-------------|----|
| ASV_16s_10104 | 0.481994171 | 0.734838696  | 3.550799096 | 1.360968738 | NA          | NA |
| ASV_16s_10105 | 0.453877758 | 0.693620184  | 3.55071583  | 1.289728377 | 0.988712115 | NA |
| ASV_16s_10106 | 0.454538254 | 0.693621002  | 3.550715593 | 1.290466438 | 0.988692647 | NA |
| ASV_16s_10107 | 0.450590337 | 0.693613349  | 3.550717024 | 1.286004798 | 0.988810019 | NA |
| ASV_16s_10108 | 0.424090515 | 0.693577438  | 3.550727295 | 1.255232722 | 0.989599084 | NA |
| ASV_16s_10109 | 0.310199545 | -0.089832233 | 3.55010071  | 1.518788415 | NA          | NA |
| ASV_16s_10110 | 0.318077724 | -0.148715454 | 3.550021849 | 1.57757507  | NA          | NA |
| ASV_16s_10111 | 0.319372318 | -0.195700125 | 3.549989794 | 1.592188435 | 0.978945427 | NA |
| ASV_16s_10112 | 0.313076173 | -0.24372148  | 3.549994318 | 1.568007485 | 0.979861415 | NA |
| ASV_16s_10113 | 0.31029081  | -0.240880498 | 3.550005365 | 1.560674562 | NA          | NA |
| ASV_16s_10114 | 0.332463961 | -0.280079557 | 3.54991971  | 1.607059183 | 0.978370195 | NA |
| ASV_16s_10115 | 0.336188111 | -0.283310251 | 3.54990711  | 1.615377274 | 0.978044465 | NA |
| ASV_16s_10116 | 0.310313627 | -0.278687575 | 3.549996477 | 1.545356881 | NA          | NA |
| ASV_16s_10117 | 0.317409344 | -0.294767516 | 3.549967581 | 1.556083936 | 0.980304274 | NA |
| ASV_16s_10118 | 0.338795399 | -0.330894373 | 3.549892892 | 1.585953772 | 0.979183893 | NA |
| ASV_16s_10119 | 0.403070865 | -0.681972894 | 3.549841093 | 0.92041282  | NA          | NA |
| ASV_16s_10120 | 0.310484749 | -0.680517279 | 3.550167818 | 0.836557892 | NA          | NA |
| ASV_16s_10121 | 0.059602247 | -0.168772912 | 3.550951234 | 0.292914396 | NA          | NA |
| ASV_16s_10122 | 0.342095674 | 0.138959977  | 3.549410905 | 1.697180006 | 0.974688814 | NA |
| ASV_16s_10123 | 0.333746455 | 0.101121604  | 3.549340036 | 1.699331439 | 0.974596815 | NA |
| ASV_16s_10124 | 0.420467229 | -0.791409035 | 3.549299029 | 1.353139009 | 0.986963535 | NA |
| ASV_16s_10125 | 0.385283975 | 0.084285563  | 3.549438874 | 1.478017286 | 0.983060956 | NA |
| ASV_16s_10126 | 0.389573497 | -0.82819307  | 3.549736851 | 1.453089972 | 0.983889396 | NA |
| ASV_16s_10127 | 0.382261299 | -0.461490353 | 3.55021175  | 1.071514474 | NA          | NA |
| ASV_16s_10128 | 0.400949879 | -0.031841148 | 3.549234792 | 1.395241586 | 0.985716564 | NA |
| ASV_16s_10129 | 0.40614246  | -0.684469716 | 3.549797501 | 1.558323034 | 0.980221554 | NA |
| ASV_16s_10130 | 0.330806402 | 0.329478162  | 3.549737844 | 0.914831704 | NA          | NA |
| ASV_16s_10131 | 0.424663186 | 0.685201424  | 3.550658235 | 1.50340345  | 0.982191599 | NA |
| ASV_16s_10132 | 0.438072507 | -0.712779079 | 3.549684185 | 1.617925153 | NA          | NA |
| ASV_16s_10133 | 0.404613073 | -0.583053231 | 3.550039259 | 1.529602872 | 0.981267077 | NA |
| ASV_16s_10134 | 0.379222308 | -0.446289058 | 3.549377265 | 1.193519159 | 0.991075353 | NA |
| ASV_16s_10135 | 0.340473733 | -0.074449755 | 3.550318622 | 1.382990224 | NA          | NA |
| ASV_16s_10136 | 0.449823577 | 0.658583003  | 3.550729657 | 1.53684993  | 0.981006425 | NA |
| ASV_16s_10137 | 0.252377476 | 1.706482035  | 3.550374054 | 0.42737435  | NA          | NA |
| ASV_16s_10138 | 0.399860935 | 1.337445889  | 3.550239502 | 0.875682021 | NA          | NA |
| ASV_16s_10139 | 0.438831675 | 1.30318831   | 3.549630373 | 1.299594943 | NA          | NA |
| ASV_16s_10140 | 0.450496749 | 0.40335707   | 3.550298104 | 0.939466014 | NA          | NA |
| ASV_16s_10141 | 0.219535858 | -0.463654561 | 3.551053885 | 0.76538434  | NA          | NA |
| ASV_16s_10142 | 0.688327294 | -0.566992348 | 3.549271254 | 1.070166813 | NA          | NA |
| ASV_16s_10143 | 0.351495405 | -1.186039246 | 3.549591661 | 0.525165585 | NA          | NA |
| ASV_16s_10144 | 0.248535671 | -0.257040652 | 3.549905553 | 1.13019312  | NA          | NA |
| ASV_16s_10145 | 0.159229564 | 1.174659935  | 3.550972758 | 0.501337045 | NA          | NA |
| ASV_16s_10146 | 0.214051898 | 0.220034517  | 3.550711847 | 0.811085435 | 0.99732917  | NA |
| ASV_16s_10147 | 0.21546572  | 0.220033844  | 3.55071096  | 0.814368823 | 0.997294535 | NA |
| ASV_16s_10148 | 0.216244613 | 0.220033472  | 3.550710476 | 0.816169472 | 0.997275416 | NA |
| ASV_16s_10149 | 0.219707187 | 0.220031875  | 3.550708367 | 0.824101857 | 0.997190135 | NA |
| ASV_16s_10150 | 0.221660417 | 0.220030974  | 3.550707206 | 0.828526382 | 0.997141816 | NA |
| ASV_16s_10151 | 0.236476462 | 0.456599843  | 3.55068096  | 1.385388561 | NA          | NA |
| ASV_16s_10152 | 0.469424422 | 1.941074023  | 3.549629241 | 0.959428851 | 0.995456726 | NA |
| ASV_16s_10153 | 0.384751858 | 0.72656231   | 3.548753008 | 0.975507328 | NA          | NA |
| ASV_16s_10154 | 0.372022397 | 1.122029347  | 3.550186136 | 1.416949428 | 0.985046455 | NA |
| ASV_16s_10155 | 0.520819174 | 0.92003973   | 3.550648956 | 1.026706932 | NA          | NA |
| ASV_16s_10156 | 0.286180323 | 0.205341593  | 3.550635849 | 1.110313483 | NA          | NA |
| ASV_16s_10157 | 0.33341098  | -0.068076761 | 3.550064894 | 1.592478644 | NA          | NA |
| ASV_16s_10158 | 0.365922927 | 1.422476561  | 3.550250025 | 0.728573244 | NA          | NA |
| ASV_16s_10159 | 0.186412843 | 0.279407624  | 3.551575285 | 0.663938078 | NA          | NA |
| ASV_16s_10160 | 0.092757787 | 0.285225721  | 3.551767114 | 0.431251511 | NA          | NA |
| ASV_16s_10161 | 0.153521623 | 0.280281946  | 3.551634542 | 0.594607666 | NA          | NA |
| ASV_16s_10162 | 0.304756624 | 1.148231763  | 3.550699181 | 0.760661229 | NA          | NA |
| ASV_16s_10163 | 0.464250432 | 0.149506411  | 3.550661184 | 2.031725773 | 0.95806355  | NA |
| ASV_16s_10164 | 0.428972857 | 0.343732808  | 3.550794561 | 0.8119644   | 0.997319927 | NA |
| ASV_16s_10165 | 0.407304959 | -0.549353557 | 3.549502598 | 0.830714801 | NA          | NA |
| ASV_16s_10166 | 0.407304959 | -0.549353557 | 3.549502598 | 0.830714801 | NA          | NA |
| ASV_16s_10167 | 0.367690296 | 1.442069353  | 3.549681741 | 1.220914292 | NA          | NA |
| ASV_16s_10168 | 0.257350196 | -0.078919477 | 3.550726897 | 1.063464235 | NA          | NA |
| ASV_16s_10169 | 0.387578466 | 0.27326137   | 3.549983964 | 1.81945253  | 0.969154194 | NA |
| ASV_16s_10170 | 0.307848802 | 0.289723903  | 3.550414857 | 1.409203315 | 0.985287707 | NA |

|               |             |              |             |             |             |    |
|---------------|-------------|--------------|-------------|-------------|-------------|----|
| ASV_16s_10171 | 0.493581817 | 0.791590561  | 3.549386865 | 1.390359074 | NA          | NA |
| ASV_16s_10172 | 0.446123689 | 0.315939447  | 3.55074833  | 1.346354461 | NA          | NA |
| ASV_16s_10173 | 0.38569528  | 0.380276066  | 3.550761132 | 1.837683342 | 0.968275508 | NA |
| ASV_16s_10174 | 0.411858659 | 0.315939231  | 3.550761706 | 1.305712795 | 0.988285855 | NA |
| ASV_16s_10175 | 0.416659034 | 0.315939251  | 3.550759699 | 1.311609914 | 0.988126137 | NA |
| ASV_16s_10176 | 0.423931038 | 0.315939254  | 3.550756749 | 1.32038611  | 0.987885978 | NA |
| ASV_16s_10177 | 0.371003007 | 0.433677944  | 3.550762243 | 2.030174579 | 0.958151395 | NA |
| ASV_16s_10178 | 0.375019889 | 0.315939473  | 3.550778791 | 1.258230042 | 0.98952379  | NA |
| ASV_16s_10179 | 0.466307967 | 0.315939337  | 3.550741379 | 1.368755805 | 0.986509081 | NA |
| ASV_16s_10180 | 0.43338206  | 0.315939261  | 3.550753065 | 1.331550216 | 0.987576203 | NA |
| ASV_16s_10181 | 0.418163295 | 0.315939342  | 3.550759083 | 1.31342221  | 0.988076785 | NA |
| ASV_16s_10182 | 0.394090959 | 0.315939345  | 3.550769551 | 1.283347683 | 0.988879561 | NA |
| ASV_16s_10183 | 0.485973119 | 0.73484519   | 3.550797274 | 1.365121277 | 0.986615695 | NA |
| ASV_16s_10184 | 0.475734506 | 0.734828643  | 3.550802033 | 1.354313106 | NA          | NA |
| ASV_16s_10185 | 0.235657782 | 0.734036927  | 3.551031281 | 0.999332349 | NA          | NA |
| ASV_16s_10186 | 0.446060305 | 0.693609286  | 3.550718695 | 1.280864703 | 0.988944305 | NA |
| ASV_16s_10187 | 0.415993826 | 0.693569119  | 3.550730691 | 1.245468146 | 0.989842048 | NA |
| ASV_16s_10188 | 0.306119924 | -0.093229709 | 3.550113771 | 1.509706376 | NA          | NA |
| ASV_16s_10189 | 0.313739183 | -0.14295901  | 3.550041971 | 1.562519507 | NA          | NA |
| ASV_16s_10190 | 0.314774859 | -0.181250799 | 3.550013819 | 1.577199156 | NA          | NA |
| ASV_16s_10191 | 0.309497277 | -0.240052439 | 3.550008595 | 1.558507792 | 0.980214719 | NA |
| ASV_16s_10192 | 0.318569967 | -0.258309704 | 3.549971139 | 1.578659788 | 0.979460853 | NA |
| ASV_16s_10193 | 0.332940312 | -0.289549621 | 3.549916219 | 1.60262932  | 0.978542502 | NA |
| ASV_16s_10194 | 0.312046537 | -0.270697658 | 3.549992136 | 1.55442369  | 0.980365477 | NA |
| ASV_16s_10195 | 0.322106527 | -0.289410585 | 3.549952234 | 1.572700036 | 0.979685532 | NA |
| ASV_16s_10196 | 0.306262525 | -0.334867977 | 3.55000496  | 1.493072642 | NA          | NA |
| ASV_16s_10197 | 0.315125043 | -0.341905579 | 3.549972123 | 1.511419364 | 0.981911687 | NA |
| ASV_16s_10198 | 0.306302454 | -0.410637297 | 3.550015517 | 1.388402309 | NA          | NA |
| ASV_16s_10199 | 0.306330974 | -0.471595535 | 3.550038886 | 1.273140405 | NA          | NA |
| ASV_16s_10200 | 0.306399423 | -0.680432861 | 3.550186768 | 0.832295118 | NA          | NA |
| ASV_16s_10201 | 0.067854475 | -0.168985941 | 3.550897489 | 0.336791857 | NA          | NA |
| ASV_16s_10203 | 0.0631402   | 0.685629144  | 3.551599303 | 0.32914441  | 0.999863164 | NA |
| ASV_16s_10204 | 0.216805269 | 0.596135437  | 3.55067667  | 0.749314363 | NA          | NA |
| ASV_16s_10205 | 0.313067528 | -0.141915467 | 3.549961156 | 1.491520433 | 0.982601771 | NA |
| ASV_16s_10206 | 0.431250301 | 1.655276674  | 3.549930661 | 0.593016379 | 0.999029628 | NA |
| ASV_16s_10207 | 0.314354367 | -0.24412091  | 3.549865811 | 0.800820968 | NA          | NA |
| ASV_16s_10208 | 0.324368575 | 0.247351531  | 3.549691216 | 1.611148321 | NA          | NA |
| ASV_16s_10209 | 0.325857134 | -0.390519741 | 3.550073994 | 1.364652173 | 0.986629418 | NA |
| ASV_16s_10210 | 0.310899737 | -0.366903042 | 3.549738813 | 0.935345246 | NA          | NA |
| ASV_16s_10211 | 0.351746702 | -0.556033495 | 3.549778167 | 1.32136562  | 0.987858991 | NA |
| ASV_16s_10212 | 0.387859641 | -0.784795696 | 3.549585504 | 1.111080768 | NA          | NA |
| ASV_16s_10213 | 0.335430072 | 0.023674525  | 3.549429746 | 1.610988936 | 0.978216664 | NA |
| ASV_16s_10214 | 0.390853915 | -0.79074519  | 3.5494484   | 1.324771806 | 0.987764857 | NA |
| ASV_16s_10215 | 0.318400261 | -0.307688037 | 3.549519707 | 1.207852432 | NA          | NA |
| ASV_16s_10216 | 0.386315734 | -0.476355672 | 3.5495592   | 1.42827016  | NA          | NA |
| ASV_16s_10217 | 0.454933418 | -0.777865897 | 3.549490812 | 1.305103561 | NA          | NA |
| ASV_16s_10218 | 0.323342057 | -0.161454474 | 3.551357601 | 0.850643261 | 0.996892119 | NA |
| ASV_16s_10219 | 0.33722483  | 0.306870523  | 3.548958456 | 1.006463786 | NA          | NA |
| ASV_16s_10220 | 0.387813408 | -0.735632445 | 3.549674653 | 1.496364329 | 0.98243526  | NA |
| ASV_16s_10221 | 0.385788125 | -0.708239739 | 3.549749195 | 1.506161681 | 0.982095576 | NA |
| ASV_16s_10222 | 0.386287786 | -0.725510733 | 3.549704428 | 1.49861256  | 0.982357654 | NA |
| ASV_16s_10223 | 0.3680149   | -0.683105633 | 3.549842685 | 1.471308099 | 0.983286381 | NA |
| ASV_16s_10224 | 0.368276683 | 0.860654369  | 3.548819274 | 0.836125974 | 0.997057559 | NA |
| ASV_16s_10225 | 0.380992699 | -0.674170091 | 3.5498486   | 1.504056411 | 0.982168895 | NA |
| ASV_16s_10226 | 0.344462766 | 0.765699417  | 3.549733406 | 0.979938739 | 0.995145693 | NA |
| ASV_16s_10227 | 0.239039279 | -0.661577157 | 3.550141196 | 0.720705104 | NA          | NA |
| ASV_16s_10228 | 0.433450001 | 0.860388089  | 3.287010876 | 1.330460507 | 0.987606651 | NA |
| ASV_16s_10229 | 0.36973019  | -0.283776321 | 3.550600559 | 1.027670201 | 0.994369742 | NA |
| ASV_16s_10230 | 0.403738169 | -0.420506001 | 3.551232867 | 0.561315464 | NA          | NA |
| ASV_16s_10231 | 0.451493858 | 1.381673462  | 3.550037826 | 1.209488354 | NA          | NA |
| ASV_16s_10232 | 0.387732735 | -0.379148586 | 3.550427265 | 1.401681048 | 0.98551972  | NA |
| ASV_16s_10233 | 0.483960809 | 1.865898654  | 2.315950573 | 2.649359473 | 0.915436695 | NA |
| ASV_16s_10234 | 0.382888345 | 1.698940801  | 3.549361275 | 0.358406678 | 0.999817713 | NA |
| ASV_16s_10235 | 0.279520963 | -0.677381551 | 3.54942234  | 0.483585482 | NA          | NA |
| ASV_16s_10236 | 0.331861693 | 0.279298305  | 3.549601844 | 0.890083666 | 0.996412297 | NA |
| ASV_16s_10237 | 0.374035753 | 0.403259783  | 3.550578734 | 0.879568201 | NA          | NA |
| ASV_16s_10238 | 0.514164684 | -0.566197604 | 3.549470398 | 0.976229037 | NA          | NA |

|               |             |              |             |             |             |    |
|---------------|-------------|--------------|-------------|-------------|-------------|----|
| ASV_16s_10239 | 0.198833304 | 1.237119591  | 3.550793297 | 0.576857685 | NA          | NA |
| ASV_16s_10240 | 0.256152844 | -0.005505842 | 3.54998217  | 1.300592122 | NA          | NA |
| ASV_16s_10241 | 0.110365886 | 0.351421905  | 3.55164747  | 0.416385325 | NA          | NA |
| ASV_16s_10242 | 0.19821763  | -0.54001643  | 3.550341067 | 0.600997864 | NA          | NA |
| ASV_16s_10243 | 0.208226402 | 0.220037411  | 3.550715632 | 0.797331734 | 0.997471089 | NA |
| ASV_16s_10244 | 0.221634175 | 0.220031034  | 3.550707223 | 0.82845067  | 0.997142648 | NA |
| ASV_16s_10245 | 0.456417507 | 1.98763046   | 3.549891238 | 0.62495978  | NA          | NA |
| ASV_16s_10246 | 0.429972789 | 1.745006605  | 3.550004863 | 0.722092752 | NA          | NA |
| ASV_16s_10247 | 0.390379757 | 1.357234148  | 3.550144238 | 0.868280632 | NA          | NA |
| ASV_16s_10248 | 0.303023884 | -0.217147997 | 3.549652467 | 1.397683213 | NA          | NA |
| ASV_16s_10249 | 0.322438816 | -0.068824997 | 3.549963491 | 1.643836682 | NA          | NA |
| ASV_16s_10250 | 0.282669368 | 1.277930494  | 3.550698449 | 0.971292581 | NA          | NA |
| ASV_16s_10251 | 0.340376593 | -0.068648562 | 3.549940516 | 1.670545064 | NA          | NA |
| ASV_16s_10252 | 0.340266475 | -0.068339205 | 3.550002688 | 1.624417059 | NA          | NA |
| ASV_16s_10253 | 0.349843395 | 0.364599535  | 3.551336271 | 0.616520406 | 0.998898204 | NA |
| ASV_16s_10254 | 0.475209616 | 1.214110269  | 3.550246636 | 0.911465693 | NA          | NA |
| ASV_16s_10255 | 0.097966329 | -0.339867746 | 3.551562811 | 0.447181967 | NA          | NA |
| ASV_16s_10256 | 0.404311296 | -0.081386696 | 3.550080565 | 1.241737893 | 0.989933928 | NA |
| ASV_16s_10257 | 0.529958477 | 0.825515937  | 3.550266352 | 2.087778084 | NA          | NA |
| ASV_16s_10258 | 0.506746986 | 0.693066702  | 3.549729975 | 1.942872963 | 0.962934383 | NA |
| ASV_16s_10259 | 0.428799549 | 0.198042967  | 3.549729759 | 1.894645509 | 0.965440548 | NA |
| ASV_16s_10260 | 0.341676352 | 0.342348845  | 3.549957569 | 1.63784693  | NA          | NA |
| ASV_16s_10261 | 0.471929628 | 0.788581701  | 3.5490768   | 1.39506509  | 0.985721936 | NA |
| ASV_16s_10262 | 0.36764442  | 0.363338816  | 3.550467802 | 0.93295991  | NA          | NA |
| ASV_16s_10263 | 0.44565176  | 0.770869735  | 3.550096804 | 1.839288611 | 0.968197472 | NA |
| ASV_16s_10264 | 0.438642374 | 0.340549466  | 3.550727844 | 1.085175251 | 0.993335091 | NA |
| ASV_16s_10265 | 0.339781957 | 0.360383443  | 3.550893001 | 1.247156064 | NA          | NA |
| ASV_16s_10266 | 0.339781957 | 0.360383443  | 3.550893001 | 1.247156064 | NA          | NA |
| ASV_16s_10267 | 0.3965414   | 0.36172431   | 3.55075922  | 1.731936515 | 0.973178993 | NA |
| ASV_16s_10268 | 0.423894809 | 0.315939361  | 3.550756768 | 1.320310118 | 0.98788807  | NA |
| ASV_16s_10269 | 0.487631293 | 0.962063873  | 3.550547857 | 1.58274874  | 0.97930586  | NA |
| ASV_16s_10270 | 0.337974156 | 0.688269528  | 3.550751018 | 1.115496032 | NA          | NA |
| ASV_16s_10271 | 0.337974156 | 0.688269528  | 3.550751018 | 1.115496032 | NA          | NA |
| ASV_16s_10272 | 0.459502858 | 1.104417792  | 3.550391263 | 1.041521737 | 0.994130637 | NA |
| ASV_16s_10273 | 0.232557022 | 0.734016234  | 3.55103732  | 0.99272294  | NA          | NA |
| ASV_16s_10274 | 0.42762868  | 0.693584947  | 3.550725853 | 1.259430103 | 0.989493549 | NA |
| ASV_16s_10275 | 0.35488923  | 0.69346397   | 3.550761314 | 1.164918353 | NA          | NA |
| ASV_16s_10276 | 0.308106049 | -0.086426163 | 3.550112527 | 1.509816391 | NA          | NA |
| ASV_16s_10277 | 0.305360615 | -0.150562804 | 3.550068797 | 1.541063103 | NA          | NA |
| ASV_16s_10278 | 0.310177399 | -0.166318018 | 3.550039735 | 1.560470927 | NA          | NA |
| ASV_16s_10279 | 0.329275979 | -0.197800123 | 3.549954922 | 1.61850096  | 0.977921408 | NA |
| ASV_16s_10280 | 0.331677782 | -0.217789841 | 3.549938714 | 1.625780457 | 0.977633073 | NA |
| ASV_16s_10281 | 0.315133385 | -0.199933969 | 3.550003084 | 1.579927695 | 0.979412866 | NA |
| ASV_16s_10282 | 0.302097343 | -0.194040398 | 3.55005535  | 1.541161849 | 0.980850326 | NA |
| ASV_16s_10283 | 0.307949803 | -0.247852085 | 3.55001226  | 1.551575069 | 0.980470227 | NA |
| ASV_16s_10284 | 0.305170145 | -0.254526774 | 3.550021151 | 1.541081654 | 0.980853236 | NA |
| ASV_16s_10285 | 0.354447722 | -0.324316151 | 3.549846702 | 1.632637706 | 0.977359462 | NA |
| ASV_16s_10286 | 0.307471894 | -0.295597968 | 3.550003781 | 1.526945062 | 0.981362134 | NA |
| ASV_16s_10287 | 0.31723896  | -0.333542603 | 3.549964623 | 1.525050562 | 0.981429716 | NA |
| ASV_16s_10288 | 0.334668286 | -0.385894255 | 3.549909367 | 1.512737838 | 0.981865397 | NA |
| ASV_16s_10289 | 0.302194312 | -0.363281903 | 3.550022204 | 1.452149038 | NA          | NA |
| ASV_16s_10290 | 0.307045321 | -0.446615715 | 3.550025421 | 1.324231045 | NA          | NA |
| ASV_16s_10291 | 0.107922754 | -0.437686615 | 3.551361079 | 0.486663292 | NA          | NA |
| ASV_16s_10292 | 0.107922754 | -0.437686615 | 3.551361079 | 0.486663292 | NA          | NA |
| ASV_16s_10293 | 0.30509946  | -0.680405345 | 3.550192935 | 0.830916382 | NA          | NA |
| ASV_16s_10294 | 0.302314097 | -0.680346215 | 3.550206224 | 0.827975588 | NA          | NA |
| ASV_16s_10295 | 0.302314097 | -0.680346215 | 3.550206224 | 0.827975588 | NA          | NA |
| ASV_16s_10296 | 0.085435841 | -0.1693065   | 3.5508174   | 0.421962376 | NA          | NA |
| ASV_16s_10297 | 0.195685251 | 0.22004429   | 3.55072454  | 0.766598589 | NA          | NA |
| ASV_16s_10299 | 0.114800364 | 0.687070086  | 3.551131525 | 0.57949303  | 0.999100233 | NA |
| ASV_16s_10300 | 0.316569337 | -0.299934566 | 3.550123829 | 1.394104416 | 0.985751156 | NA |
| ASV_16s_10301 | 0.315828657 | -0.046300484 | 3.549934638 | 1.496716263 | 0.982423125 | NA |
| ASV_16s_10302 | 0.308711283 | -0.173733851 | 3.550802407 | 0.843424593 | NA          | NA |
| ASV_16s_10303 | 0.389866793 | -0.458817317 | 3.54965613  | 1.464333965 | 0.983518793 | NA |
| ASV_16s_10304 | 0.312588405 | -0.344973658 | 3.55020068  | 1.349967976 | 0.987054656 | NA |
| ASV_16s_10305 | 0.328123477 | -0.712409171 | 3.550153035 | 0.915460836 | NA          | NA |
| ASV_16s_10306 | 0.344406876 | -0.533094873 | 3.549733542 | 1.33566252  | 0.987460888 | NA |



|               |             |              |             |             |             |    |
|---------------|-------------|--------------|-------------|-------------|-------------|----|
| ASV_16s_10307 | 0.329200215 | 1.741027858  | 3.549681666 | 0.394863691 | NA          | NA |
| ASV_16s_10308 | 0.323291423 | 0.491529937  | 3.549373502 | 1.458016836 | 0.983727629 | NA |
| ASV_16s_10309 | 0.372955493 | -0.516359911 | 3.549551563 | 1.40621767  | 0.985380062 | NA |
| ASV_16s_10310 | 0.408358463 | -0.79114516  | 3.549357052 | 1.340329091 | 0.987329241 | NA |
| ASV_16s_10311 | 0.330669436 | 0.147829265  | 3.549287476 | 1.658435972 | 0.976312681 | NA |
| ASV_16s_10312 | 0.389702294 | -0.782148767 | 3.5494895   | 1.408171925 | 0.985319651 | NA |
| ASV_16s_10313 | 0.382865712 | -1.050958307 | 3.55028087  | 0.753235024 | 0.997892436 | NA |
| ASV_16s_10314 | 0.396663809 | -0.786158732 | 3.549447245 | 1.408443804 | 0.985311234 | NA |
| ASV_16s_10315 | 0.358593828 | 0.02674466   | 3.549211841 | 1.781044127 | 0.970959944 | NA |
| ASV_16s_10316 | 0.426142309 | 0.517347108  | 3.549635908 | 2.181439562 | 0.949119152 | NA |
| ASV_16s_10317 | 0.322780832 | -1.081384502 | 3.54977595  | 1.075500839 | 0.993516957 | NA |
| ASV_16s_10318 | 0.338492074 | 0.336194282  | 3.551489787 | 0.728570972 | NA          | NA |
| ASV_16s_10319 | 0.403171829 | -0.7550086   | 3.549592187 | 1.519293704 | 0.981634186 | NA |
| ASV_16s_10320 | 0.363288219 | -0.899563063 | 3.54931956  | 1.036711748 | 0.994214387 | NA |
| ASV_16s_10321 | 0.395707231 | -0.701468454 | 3.549756566 | 1.531918461 | 0.981184025 | NA |
| ASV_16s_10322 | 0.413585425 | -0.724412057 | 3.549736027 | 1.387090566 | 0.98596339  | NA |
| ASV_16s_10323 | 0.353042542 | 0.190723352  | 3.550636911 | 0.730990085 | NA          | NA |
| ASV_16s_10324 | 0.332981049 | 0.927162817  | 3.551212968 | 0.878987371 | NA          | NA |
| ASV_16s_10325 | 0.381346913 | -0.015913686 | 3.549395573 | 1.080298301 | 0.99342717  | NA |
| ASV_16s_10326 | 0.394226164 | -0.250828923 | 3.549366819 | 1.740479187 | 0.972800198 | NA |
| ASV_16s_10327 | 0.363285281 | -0.081089002 | 3.550345893 | 1.367016893 | 0.986560154 | NA |
| ASV_16s_10328 | 0.398190988 | 0.063110825  | 3.550780361 | 0.906249294 | 0.99620251  | NA |
| ASV_16s_10329 | 0.480092402 | 1.338475606  | 3.55000001  | 0.93454278  | NA          | NA |
| ASV_16s_10330 | 0.376603186 | 1.333453085  | 3.550312839 | 0.855949593 | NA          | NA |
| ASV_16s_10331 | 0.384599444 | 0.830333545  | 3.550960424 | 0.772490937 | NA          | NA |
| ASV_16s_10332 | 0.253861888 | 0.388135199  | 3.551188016 | 0.752050933 | NA          | NA |
| ASV_16s_10333 | 0.235238567 | 0.229124474  | 3.550881031 | 0.491576375 | 0.999476744 | NA |
| ASV_16s_10334 | 0.361920088 | 0.911808148  | 3.550410814 | 1.176113867 | 0.991466511 | NA |
| ASV_16s_10335 | 0.361884017 | 0.35184371   | 3.549803498 | 1.704188282 | 0.974388421 | NA |
| ASV_16s_10336 | 0.50022486  | 1.338685044  | 3.54995179  | 0.947791788 | NA          | NA |
| ASV_16s_10337 | 0.213398058 | -0.54326467  | 3.550230094 | 0.624311837 | NA          | NA |
| ASV_16s_10338 | 0.155039312 | 1.166762062  | 3.550994902 | 0.492433245 | NA          | NA |
| ASV_16s_10339 | 0.22228485  | 0.220030767  | 3.550706842 | 0.829900699 | NA          | NA |
| ASV_16s_10340 | 0.222122892 | 0.220030824  | 3.550706937 | 0.82953616  | 0.997130713 | NA |
| ASV_16s_10341 | 0.42406461  | 0.33958801   | 3.55074081  | 0.773614744 | NA          | NA |
| ASV_16s_10342 | 0.348009692 | -1.007703105 | 3.549696649 | 1.185006804 | NA          | NA |
| ASV_16s_10343 | 0.325913777 | -0.069131167 | 3.550057499 | 1.640375634 | 0.97704838  | NA |
| ASV_16s_10344 | 0.359161473 | -0.06072572  | 3.550482154 | 1.296862928 | 0.988523057 | NA |
| ASV_16s_10345 | 0.316421835 | -0.068904468 | 3.549986597 | 1.631162761 | NA          | NA |
| ASV_16s_10346 | 0.329363354 | 0.616256099  | 3.549700378 | 1.368876132 | NA          | NA |
| ASV_16s_10347 | 0.318899426 | -0.068755999 | 3.549975014 | 1.628818728 | NA          | NA |
| ASV_16s_10348 | 0.322805892 | -0.694473847 | 3.549784337 | 1.022840711 | NA          | NA |
| ASV_16s_10349 | 0.447104993 | 0.693801084  | 3.549392871 | 1.312639904 | NA          | NA |
| ASV_16s_10350 | 0.417971516 | 0.625245375  | 3.549384807 | 1.163637575 | NA          | NA |
| ASV_16s_10351 | 0.513566234 | 0.312033546  | 3.550591072 | 1.017432412 | NA          | NA |
| ASV_16s_10352 | 0.251723002 | 0.279664674  | 3.551439627 | 0.773173952 | NA          | NA |
| ASV_16s_10353 | 0.090316793 | 0.285479897  | 3.551774845 | 0.423502762 | NA          | NA |
| ASV_16s_10354 | 0.330602314 | -0.029249032 | 3.550765142 | 1.249086796 | NA          | NA |
| ASV_16s_10355 | 0.368562722 | 0.289566428  | 3.54967962  | 1.681411248 | NA          | NA |
| ASV_16s_10356 | 0.408828194 | 0.750386397  | 3.549618024 | 1.442734437 | NA          | NA |
| ASV_16s_10357 | 0.335251531 | 0.360382216  | 3.550897035 | 1.240332191 | NA          | NA |
| ASV_16s_10358 | 0.386579522 | 0.315939388  | 3.550773084 | 1.273579946 | 0.989132911 | NA |
| ASV_16s_10359 | 0.361107633 | 0.315939396  | 3.550786154 | 1.239018931 | 0.990000572 | NA |
| ASV_16s_10360 | 0.395393322 | 0.402945511  | 3.550754152 | 1.972194442 | 0.961363283 | NA |
| ASV_16s_10361 | 0.463215177 | 0.73480767   | 3.550808145 | 1.340735676 | NA          | NA |
| ASV_16s_10362 | 0.463215177 | 0.73480767   | 3.550808145 | 1.340735676 | NA          | NA |
| ASV_16s_10363 | 0.463215177 | 0.73480767   | 3.550808145 | 1.340735676 | NA          | NA |
| ASV_16s_10364 | 0.29793216  | -0.047758503 | 3.550198605 | 1.441983711 | NA          | NA |
| ASV_16s_10365 | 0.30557994  | -0.150844723 | 3.550067777 | 1.541736208 | NA          | NA |
| ASV_16s_10366 | 0.305838859 | -0.160713517 | 3.550060067 | 1.545943485 | NA          | NA |
| ASV_16s_10367 | 0.305838859 | -0.160713517 | 3.550060067 | 1.545943485 | NA          | NA |
| ASV_16s_10368 | 0.306615616 | -0.189998401 | 3.550039844 | 1.554247272 | 0.980371974 | NA |
| ASV_16s_10369 | 0.337017991 | -0.231754361 | 3.549916857 | 1.638728115 | 0.977114821 | NA |
| ASV_16s_10370 | 0.314177683 | -0.263334317 | 3.549985824 | 1.563823063 | 0.980017493 | NA |
| ASV_16s_10371 | 0.298046242 | -0.24718816  | 3.550050974 | 1.522185183 | NA          | NA |
| ASV_16s_10372 | 0.313657103 | -0.281774184 | 3.549983669 | 1.553129161 | 0.980413121 | NA |
| ASV_16s_10373 | 0.315739642 | -0.293259526 | 3.549973907 | 1.552133578 | 0.980449716 | NA |

|               |             |              |             |             |             |    |
|---------------|-------------|--------------|-------------|-------------|-------------|----|
| ASV_16s_10374 | 0.322183654 | -0.317952666 | 3.549948168 | 1.55218398  | 0.980447864 | NA |
| ASV_16s_10375 | 0.301872984 | -0.300494948 | 3.550024542 | 1.507325927 | 0.982054952 | NA |
| ASV_16s_10376 | 0.304669754 | -0.323269673 | 3.550011472 | 1.498404137 | 0.982364857 | NA |
| ASV_16s_10377 | 0.298097578 | -0.338608696 | 3.550037028 | 1.466108918 | NA          | NA |
| ASV_16s_10378 | 0.325993832 | -0.37002508  | 3.549936005 | 1.510778022 | 0.981934178 | NA |
| ASV_16s_10379 | 0.106464338 | -0.433066732 | 3.551374336 | 0.482489023 | NA          | NA |
| ASV_16s_10380 | 0.387300487 | -0.681773094 | 3.549885928 | 0.907530308 | NA          | NA |
| ASV_16s_10381 | 0.351587527 | -0.681255847 | 3.550001937 | 0.876412374 | NA          | NA |
| ASV_16s_10382 | 0.326642315 | -0.68082884  | 3.550097789 | 0.85277757  | 0.996867296 | NA |
| ASV_16s_10383 | 0.33124846  | -0.680912331 | 3.550079042 | 0.857262869 | 0.996814708 | NA |
| ASV_16s_10384 | 0.298228772 | -0.680257253 | 3.550226207 | 0.823598321 | NA          | NA |
| ASV_16s_10385 | 0.095017593 | -0.169430357 | 3.550786165 | 0.464265091 | NA          | NA |
| ASV_16s_10386 | 0.101122807 | -0.169498502 | 3.550769333 | 0.489823275 | NA          | NA |
| ASV_16s_10387 | 0.317121914 | -0.122470554 | 3.549968085 | 1.682574773 | 0.975308274 | NA |
| ASV_16s_10388 | 0.304945965 | -0.108934119 | 3.549755841 | 1.318873915 | NA          | NA |
| ASV_16s_10389 | 0.321067445 | 0.236650059  | 3.549650351 | 1.644676086 | 0.976874422 | NA |
| ASV_16s_10390 | 0.342154215 | -0.330925423 | 3.549372613 | 1.109296292 | NA          | NA |
| ASV_16s_10391 | 0.350262294 | 0.486796113  | 3.549401492 | 1.589761363 | 0.979038448 | NA |
| ASV_16s_10392 | 0.386995521 | 0.118348964  | 3.549056682 | 1.941494894 | 0.963007342 | NA |
| ASV_16s_10393 | 0.372343496 | -0.790056553 | 3.549550773 | 1.267845166 | 0.98927998  | NA |
| ASV_16s_10394 | 0.347902603 | 0.131944099  | 3.54937116  | 1.057918525 | NA          | NA |
| ASV_16s_10395 | 0.390477704 | -0.784272166 | 3.549477877 | 1.401708763 | NA          | NA |
| ASV_16s_10396 | 0.337018757 | -0.714658684 | 3.550392051 | 1.084911414 | NA          | NA |
| ASV_16s_10397 | 0.361336677 | -0.704621267 | 3.549798136 | 1.439993164 | NA          | NA |
| ASV_16s_10398 | 0.377302176 | 0.783909647  | 3.548838542 | 1.38547433  | 0.986012023 | NA |
| ASV_16s_10399 | 0.367059187 | -0.81895093  | 3.549712166 | 1.37821659  | 0.986229145 | NA |
| ASV_16s_10400 | 0.387299109 | -0.744865752 | 3.549647759 | 1.486757218 | 0.982764586 | NA |
| ASV_16s_10401 | 0.365542583 | -0.722392756 | 3.549743677 | 1.445245467 | 0.984144959 | NA |
| ASV_16s_10402 | 0.242100452 | 1.115410849  | 3.550918101 | 0.793522776 | NA          | NA |
| ASV_16s_10403 | 0.374464797 | -0.716155948 | 3.550198732 | 1.042122262 | 0.994120127 | NA |
| ASV_16s_10404 | 0.385206451 | -0.700759391 | 3.549770557 | 1.507361571 | 0.982053708 | NA |
| ASV_16s_10405 | 0.379725757 | 0.687310702  | 3.550660825 | 1.433057088 | NA          | NA |
| ASV_16s_10406 | 0.333523044 | -1.034938712 | 3.549868232 | 0.672052383 | NA          | NA |
| ASV_16s_10407 | 0.396810811 | -0.669084504 | 3.549843784 | 1.533611125 | 0.981123178 | NA |
| ASV_16s_10408 | 0.354692496 | -0.191409234 | 3.549898471 | 1.374726313 | 0.986332827 | NA |
| ASV_16s_10409 | 0.395390763 | 0.320369436  | 3.55038567  | 1.588567844 | NA          | NA |
| ASV_16s_10410 | 0.37086271  | -0.096285551 | 3.5508365   | 0.995889374 | NA          | NA |
| ASV_16s_10411 | 0.371655227 | 0.182500041  | 3.549506603 | 1.413415549 | NA          | NA |
| ASV_16s_10412 | 0.468505753 | 0.371851203  | 3.549657531 | 1.265848316 | 0.9893309   | NA |
| ASV_16s_10413 | 0.468743077 | -0.234241867 | 3.54967103  | 1.596968251 | 0.978761525 | NA |
| ASV_16s_10414 | 0.401867492 | 0.614901291  | 3.550765746 | 1.648862162 | 0.976704357 | NA |
| ASV_16s_10415 | 0.515121314 | -0.490657996 | 3.551096232 | 0.683967524 | NA          | NA |
| ASV_16s_10416 | 0.3236499   | 0.116962296  | 3.549936991 | 1.632992135 | 0.977345267 | NA |
| ASV_16s_10417 | 0.319729426 | 0.268157248  | 3.549075602 | 1.016923539 | NA          | NA |
| ASV_16s_10418 | 0.23773391  | -0.146256365 | 3.550682721 | 0.65884638  | 0.998632347 | NA |
| ASV_16s_10419 | 0.411048046 | 0.810412528  | 3.549562072 | 1.416062943 | 0.985074184 | NA |
| ASV_16s_10420 | 0.351336589 | 0.539310346  | 3.549857957 | 1.191800017 | NA          | NA |
| ASV_16s_10421 | 0.323162096 | 0.40125179   | 3.550819287 | 0.832163958 | NA          | NA |
| ASV_16s_10422 | 0.327979232 | 0.552544246  | 3.549911423 | 1.413697431 | 0.985148027 | NA |
| ASV_16s_10423 | 0.250431322 | 0.387181412  | 3.551209006 | 0.747486879 | NA          | NA |
| ASV_16s_10424 | 0.250431322 | 0.387181412  | 3.551209006 | 0.747486879 | NA          | NA |
| ASV_16s_10425 | 0.3942621   | 1.188583188  | 3.550202927 | 1.089686807 | NA          | NA |
| ASV_16s_10426 | 0.330175568 | -0.539282859 | 3.550473855 | 1.509245876 | 0.981987841 | NA |
| ASV_16s_10427 | 0.493465065 | 1.338617033  | 3.549967572 | 0.943393147 | NA          | NA |
| ASV_16s_10428 | 0.192931827 | -0.538450405 | 3.55038298  | 0.5924292   | NA          | NA |
| ASV_16s_10429 | 0.345425517 | -0.07910222  | 3.550672812 | 1.212070452 | NA          | NA |
| ASV_16s_10430 | 0.294548267 | -0.079010876 | 3.550700126 | 1.131440913 | NA          | NA |
| ASV_16s_10431 | 0.207658502 | 0.220037735  | 3.550716016 | 0.795939051 | 0.997485176 | NA |
| ASV_16s_10432 | 0.23099523  | 0.596154774  | 3.550668899 | 0.780669109 | NA          | NA |
| ASV_16s_10433 | 0.307431744 | -0.069075706 | 3.550123588 | 1.583753014 | NA          | NA |
| ASV_16s_10434 | 0.286937415 | 0.296690451  | 3.549943122 | 1.337924583 | NA          | NA |
| ASV_16s_10435 | 0.319114971 | -0.068929642 | 3.54998052  | 1.639295036 | 0.977091971 | NA |
| ASV_16s_10436 | 0.350319874 | 1.28607489   | 3.550102904 | 1.393050657 | NA          | NA |
| ASV_16s_10437 | 0.340043377 | -0.354823419 | 3.549463059 | 1.80158603  | 0.970001845 | NA |
| ASV_16s_10438 | 0.326437628 | -0.067638543 | 3.550186173 | 1.511382792 | 0.98191297  | NA |
| ASV_16s_10439 | 0.331051458 | -0.06748552  | 3.550222705 | 1.494556122 | NA          | NA |
| ASV_16s_10440 | 0.403524102 | 1.069209399  | 3.550397157 | 1.016467759 | 0.994558496 | NA |

|               |             |              |             |             |             |    |
|---------------|-------------|--------------|-------------|-------------|-------------|----|
| ASV_16s_10441 | 0.424949357 | 0.32767122   | 3.549768228 | 1.838087614 | 0.968255865 | NA |
| ASV_16s_10442 | 0.179054441 | 0.279347967  | 3.55159483  | 0.64951021  | NA          | NA |
| ASV_16s_10443 | 0.416358809 | -0.986518447 | 3.54986185  | 0.786038981 | NA          | NA |
| ASV_16s_10444 | 0.423978975 | 1.10872299   | 3.550184293 | 1.09375704  | 0.993171085 | NA |
| ASV_16s_10445 | 0.413767632 | 0.189239993  | 3.550265773 | 2.360919398 | 0.937200952 | NA |
| ASV_16s_10446 | 0.482726374 | 0.176638784  | 3.550333396 | 2.035390351 | 0.957855627 | NA |
| ASV_16s_10447 | 0.586601573 | 0.418802215  | 3.550699854 | 2.625886107 | 0.91732326  | NA |
| ASV_16s_10448 | 0.431548498 | 0.343516012  | 3.549829081 | 1.772726809 | NA          | NA |
| ASV_16s_10449 | 0.402389838 | 0.342956327  | 3.54980124  | 1.786202778 | 0.970720996 | NA |
| ASV_16s_10450 | 0.409954287 | 0.784410357  | 3.549397497 | 1.41652531  | NA          | NA |
| ASV_16s_10451 | 0.420148273 | 0.699160805  | 3.549928042 | 1.390449897 | NA          | NA |
| ASV_16s_10452 | 0.433570662 | 0.401625254  | 3.550596096 | 1.453532119 | NA          | NA |
| ASV_16s_10453 | 0.454460262 | 0.342568018  | 3.549701385 | 1.937367543 | NA          | NA |
| ASV_16s_10454 | 0.404341401 | 0.335337011  | 3.550782649 | 1.094980784 | 0.993147492 | NA |
| ASV_16s_10455 | 0.492283597 | 0.489102293  | 3.550371804 | 1.812499602 | 0.969485652 | NA |
| ASV_16s_10456 | 0.387538626 | 0.315939405  | 3.550772629 | 1.274817931 | 0.989101    | NA |
| ASV_16s_10457 | 0.430075456 | 0.315939395  | 3.550754346 | 1.327596335 | 0.987686461 | NA |
| ASV_16s_10458 | 0.353980407 | 0.315939417  | 3.55079015  | 1.228891013 | 0.990246404 | NA |
| ASV_16s_10459 | 0.345425517 | 0.315939516  | 3.550795161 | 1.21648881  | NA          | NA |
| ASV_16s_10460 | 0.345425517 | 0.315939516  | 3.550795161 | 1.21648881  | NA          | NA |
| ASV_16s_10461 | 0.328961512 | 0.688252852  | 3.550756396 | 1.101772598 | NA          | NA |
| ASV_16s_10462 | 0.472173791 | 1.157073137  | 3.55025653  | 1.022176676 | 0.994462819 | NA |
| ASV_16s_10463 | 0.489450668 | 1.176916448  | 3.55016787  | 1.022677007 | 0.994454383 | NA |
| ASV_16s_10464 | 0.345425517 | 0.693444673  | 3.550767028 | 1.151177848 | NA          | NA |
| ASV_16s_10465 | 0.293732753 | 0.271715015  | 3.550930109 | 0.799011781 | NA          | NA |
| ASV_16s_10466 | 0.293875355 | -0.093557681 | 3.550165256 | 1.473872518 | NA          | NA |
| ASV_16s_10467 | 0.300464643 | -0.114243931 | 3.550117526 | 1.507840298 | NA          | NA |
| ASV_16s_10468 | 0.31338393  | -0.179529009 | 3.55002004  | 1.571701389 | NA          | NA |
| ASV_16s_10469 | 0.30331275  | -0.223977038 | 3.550037594 | 1.543316553 | 0.980772039 | NA |
| ASV_16s_10470 | 0.304089507 | -0.253416285 | 3.550025643 | 1.538163161 | NA          | NA |
| ASV_16s_10471 | 0.298012352 | -0.247142126 | 3.550051163 | 1.52203532  | 0.981536978 | NA |
| ASV_16s_10472 | 0.318300426 | -0.31475781  | 3.54996199  | 1.543900736 | 0.980750781 | NA |
| ASV_16s_10473 | 0.299053732 | -0.297897602 | 3.550036087 | 1.500684375 | 0.982285957 | NA |
| ASV_16s_10474 | 0.297793362 | -0.306980674 | 3.5500399   | 1.490772839 | 0.982627385 | NA |
| ASV_16s_10475 | 0.300578725 | -0.309484715 | 3.550028535 | 1.497168051 | 0.98240754  | NA |
| ASV_16s_10476 | 0.297545851 | -0.317109651 | 3.550039932 | 1.482546875 | 0.982907742 | NA |
| ASV_16s_10477 | 0.328377528 | -0.361666007 | 3.549927211 | 1.526632424 | 0.981373297 | NA |
| ASV_16s_10478 | 0.294017957 | -0.345979477 | 3.550053947 | 1.447339915 | NA          | NA |
| ASV_16s_10479 | 0.320291768 | -0.386810038 | 3.549958231 | 1.469825838 | 0.98333594  | NA |
| ASV_16s_10480 | 0.323805731 | -0.480406694 | 3.549975968 | 1.299616875 | 0.988449563 | NA |
| ASV_16s_10481 | 0.105005923 | -0.428389704 | 3.551387872 | 0.478298733 | NA          | NA |
| ASV_16s_10482 | 0.402317493 | -0.681965642 | 3.549843285 | 0.919750267 | 0.996021329 | NA |
| ASV_16s_10483 | 0.32587434  | -0.680814496 | 3.550101015 | 0.852006688 | 0.996876276 | NA |
| ASV_16s_10484 | 0.351666759 | -0.681256857 | 3.550001724 | 0.876458612 | 0.996583141 | NA |
| ASV_16s_10485 | 0.294143446 | -0.680165878 | 3.550246739 | 0.819163623 | NA          | NA |
| ASV_16s_10486 | 0.100383418 | -0.06955343  | 3.550766857 | 0.715122389 | NA          | NA |
| ASV_16s_10487 | 0.178745798 | 0.687720398  | 3.550925717 | 0.797234225 | 0.997472077 | NA |
| ASV_16s_10488 | 0.310222317 | -0.187877987 | 3.550306126 | 1.314210299 | 0.988055285 | NA |
| ASV_16s_10489 | 0.355344029 | -0.504120974 | 3.5498767   | 1.424167617 | NA          | NA |
| ASV_16s_10490 | 0.398823208 | -0.68119305  | 3.549614359 | 1.402389109 | 0.985497976 | NA |
| ASV_16s_10491 | 0.30164397  | -0.321772443 | 3.5496206   | 1.050982284 | NA          | NA |
| ASV_16s_10492 | 0.328556911 | 0.691581345  | 3.549814638 | 1.398719312 | 0.985610458 | NA |
| ASV_16s_10493 | 0.330955762 | 0.458369161  | 3.549610364 | 1.553255688 | 0.980408467 | NA |
| ASV_16s_10494 | 0.332479729 | 0.230305184  | 3.549763949 | 1.43932519  | NA          | NA |
| ASV_16s_10495 | 0.408512134 | -0.786277608 | 3.549416243 | 1.452957623 | 0.983893728 | NA |
| ASV_16s_10496 | 0.360840622 | -0.369674701 | 3.549532933 | 1.3198114   | 0.987901795 | NA |
| ASV_16s_10497 | 0.406452965 | 0.030457731  | 3.5493595   | 1.360995302 | 0.986736101 | NA |
| ASV_16s_10498 | 0.34781709  | -0.294105664 | 3.549486473 | 1.3448099   | NA          | NA |
| ASV_16s_10499 | 0.334878786 | 1.784217838  | 3.549904411 | 0.727217984 | NA          | NA |
| ASV_16s_10500 | 0.382871601 | 0.456024846  | 3.549358496 | 1.477882331 | NA          | NA |
| ASV_16s_10501 | 0.363795863 | -0.288592091 | 3.550810328 | 0.81651075  | 0.997271782 | NA |
| ASV_16s_10502 | 0.378705243 | -0.661139755 | 3.549878809 | 1.500029214 | 0.982308648 | NA |
| ASV_16s_10503 | 0.380612637 | -0.124033546 | 3.550558352 | 1.297199738 | 0.988514084 | NA |
| ASV_16s_10504 | 0.34353899  | -0.298574102 | 3.550396687 | 1.2197448   | 0.99046515  | NA |
| ASV_16s_10505 | 0.322990391 | -0.974836737 | 3.549769606 | 1.01323066  | NA          | NA |
| ASV_16s_10506 | 0.37326954  | 0.340896667  | 3.551292443 | 0.785177361 | NA          | NA |
| ASV_16s_10507 | 0.341670263 | -0.780681256 | 3.549780965 | 1.1734088   | NA          | NA |

|               |             |              |             |             |             |    |
|---------------|-------------|--------------|-------------|-------------|-------------|----|
| ASV_16s_10508 | 0.327082083 | -0.608665511 | 3.549950376 | 1.233066232 | NA          | NA |
| ASV_16s_10509 | 0.37711857  | -0.163530265 | 3.550505315 | 2.108427668 | 0.953595986 | NA |
| ASV_16s_10510 | 0.338723991 | 0.220799866  | 3.548949099 | 1.615555448 | NA          | NA |
| ASV_16s_10511 | 0.428994821 | -0.214362431 | 3.548979232 | 1.15918136  | NA          | NA |
| ASV_16s_10512 | 0.352482247 | 0.219984804  | 3.548897645 | 1.663307153 | NA          | NA |
| ASV_16s_10513 | 0.346189075 | 0.083118344  | 3.550244994 | 0.971122519 | NA          | NA |
| ASV_16s_10514 | 0.468950852 | 0.770237884  | 3.549024862 | 1.284393027 | 0.988852234 | NA |
| ASV_16s_10515 | 0.435435547 | 0.727665458  | 3.550830557 | 1.345836167 | NA          | NA |
| ASV_16s_10516 | 0.325293457 | -0.068203273 | 3.550251932 | 1.435251194 | NA          | NA |
| ASV_16s_10517 | 0.168524296 | 0.888189425  | 3.550958886 | 0.489918511 | NA          | NA |
| ASV_16s_10518 | 0.339790336 | -0.026792357 | 3.550858764 | 0.906008952 | NA          | NA |
| ASV_16s_10519 | 0.346263855 | 0.693313287  | 3.549344319 | 1.579763104 | 0.979419099 | NA |
| ASV_16s_10520 | 0.514939462 | 0.271575164  | 3.550068057 | 0.979593973 | 0.995151031 | NA |
| ASV_16s_10521 | 0.318735218 | 0.40056403   | 3.550838982 | 0.82757843  | NA          | NA |
| ASV_16s_10522 | 0.453637941 | 0.627045615  | 3.549635866 | 2.368149793 | 0.936694087 | NA |
| ASV_16s_10523 | 0.247000756 | 0.386214533  | 3.551230527 | 0.742866031 | NA          | NA |
| ASV_16s_10524 | 0.576663528 | 0.066596702  | 3.549880526 | 0.962942158 | NA          | NA |
| ASV_16s_10525 | 0.265249698 | -0.558868303 | 3.550038691 | 0.94897423  | 0.995610197 | NA |
| ASV_16s_10526 | 0.23938723  | -0.083939023 | 3.55067449  | 0.880963251 | NA          | NA |
| ASV_16s_10527 | 0.365737939 | 1.336096372  | 3.55019413  | 0.783552534 | NA          | NA |
| ASV_16s_10528 | 0.190879972 | 1.226516106  | 3.550828026 | 0.562784293 | NA          | NA |
| ASV_16s_10529 | 0.128397078 | 0.590472989  | 3.551284195 | 0.620509219 | NA          | NA |
| ASV_16s_10530 | 0.259388803 | 0.133001255  | 3.549825215 | 1.227280437 | 0.990285147 | NA |
| ASV_16s_10531 | 0.190288925 | -0.53743625  | 3.550404313 | 0.588031071 | NA          | NA |
| ASV_16s_10532 | 0.179333407 | -0.082734429 | 3.550285887 | 0.885795143 | NA          | NA |
| ASV_16s_10533 | 0.29051336  | -0.079002283 | 3.550702703 | 1.1244529   | NA          | NA |
| ASV_16s_10534 | 0.20705686  | 0.220038004  | 3.550716423 | 0.794481296 | 0.997499866 | NA |
| ASV_16s_10535 | 0.321862039 | 0.310934154  | 3.550791402 | 1.157819217 | NA          | NA |
| ASV_16s_10536 | 0.227830912 | 0.59615067   | 3.550670551 | 0.77380246  | NA          | NA |
| ASV_16s_10537 | 0.391800539 | 1.45483354   | 3.550172173 | 1.193835153 | 0.99106815  | NA |
| ASV_16s_10538 | 0.22932903  | -0.050032311 | 3.550554854 | 0.827862187 | NA          | NA |
| ASV_16s_10539 | 0.43917902  | 0.397841314  | 3.548713337 | 1.049708844 | 0.993986317 | NA |
| ASV_16s_10540 | 0.306852439 | 0.676312397  | 3.550544092 | 1.321532717 | 0.987854383 | NA |
| ASV_16s_10541 | 0.411744096 | 1.331996428  | 3.315897209 | 1.617129311 | 0.977975494 | NA |
| ASV_16s_10542 | 0.297719996 | -0.214931711 | 3.550169915 | 0.797374643 | NA          | NA |
| ASV_16s_10543 | 0.303892354 | -0.069045083 | 3.550109069 | 1.579123582 | NA          | NA |
| ASV_16s_10544 | 0.35024556  | -0.055775152 | 3.550560513 | 1.1218557   | NA          | NA |
| ASV_16s_10545 | 0.307856501 | -0.068873448 | 3.550011406 | 1.605091991 | NA          | NA |
| ASV_16s_10546 | 0.427305916 | 0.047733681  | 3.549271754 | 0.768245104 | NA          | NA |
| ASV_16s_10547 | 0.290112884 | 0.758266009  | 3.550390146 | 1.469170239 | NA          | NA |
| ASV_16s_10548 | 0.310334092 | -0.068712077 | 3.549999467 | 1.602646728 | NA          | NA |
| ASV_16s_10549 | 0.299687928 | -0.361853614 | 3.550688989 | 1.347507112 | NA          | NA |
| ASV_16s_10550 | 0.404597698 | 0.342314221  | 3.550884209 | 0.878133511 | 0.996562431 | NA |
| ASV_16s_10551 | 0.256179917 | 0.279433151  | 3.551430671 | 0.779547952 | NA          | NA |
| ASV_16s_10552 | 0.421181722 | 0.343732656  | 3.550803039 | 0.803387189 | 0.997409232 | NA |
| ASV_16s_10553 | 0.452622583 | 0.582372412  | 3.550668218 | 1.721819073 | 0.973623683 | NA |
| ASV_16s_10554 | 0.287490725 | 0.342619916  | 3.550736685 | 1.78953667  | 0.970565979 | NA |
| ASV_16s_10555 | 0.438751455 | 0.470077336  | 3.549609268 | 1.636832376 | 0.977191134 | NA |
| ASV_16s_10556 | 0.527254369 | 0.739848775  | 3.549977973 | 2.116492985 | 0.953112152 | NA |
| ASV_16s_10557 | 0.443650271 | 0.353516114  | 3.550054385 | 1.698596629 | 0.974628259 | NA |
| ASV_16s_10558 | 0.430937608 | 0.353490322  | 3.550061275 | 1.680041473 | 0.975414819 | NA |
| ASV_16s_10559 | 0.35714956  | 0.409208731  | 3.550546274 | 1.347221045 | NA          | NA |
| ASV_16s_10560 | 0.523811397 | 0.473831965  | 3.548866636 | 1.607536065 | NA          | NA |
| ASV_16s_10561 | 0.326190679 | 0.360379657  | 3.550905438 | 1.226404757 | NA          | NA |
| ASV_16s_10562 | 0.381125311 | 0.315939424  | 3.550775742 | 1.266338091 | 0.989318424 | NA |
| ASV_16s_10563 | 0.400066447 | 0.315939418  | 3.550766847 | 1.290897691 | 0.988681262 | NA |
| ASV_16s_10564 | 0.416519279 | 0.315939414  | 3.550759768 | 1.31136538  | 0.988132786 | NA |
| ASV_16s_10565 | 0.348221964 | 0.315939437  | 3.550793499 | 1.22055526  | 0.990445891 | NA |
| ASV_16s_10566 | 0.373452555 | 0.315939427  | 3.550779611 | 1.255974638 | 0.989580478 | NA |
| ASV_16s_10567 | 0.340693661 | 0.315939526  | 3.550798043 | 1.20947663  | NA          | NA |
| ASV_16s_10568 | 0.340693661 | 0.315939526  | 3.550798043 | 1.20947663  | NA          | NA |
| ASV_16s_10569 | 0.46574642  | 1.149935913  | 3.550572277 | 1.074407053 | NA          | NA |
| ASV_16s_10570 | 0.450695848 | 0.734785505  | 3.550814594 | 1.326787178 | NA          | NA |
| ASV_16s_10571 | 0.450695848 | 0.734785505  | 3.550814594 | 1.326787178 | NA          | NA |
| ASV_16s_10572 | 0.398598255 | 0.693538578  | 3.550738467 | 1.223717616 | 0.990370513 | NA |
| ASV_16s_10573 | 0.370759122 | 0.693493449  | 3.550752405 | 1.187013707 | 0.991222837 | NA |
| ASV_16s_10574 | 0.374335874 | 0.693500008  | 3.5507505   | 1.191866009 | 0.991112977 | NA |

|               |             |              |             |              |             |    |
|---------------|-------------|--------------|-------------|--------------|-------------|----|
| ASV_16s_10575 | 0.340693661 | 0.693434608  | 3.550770004 | 1.144178041  | NA          | NA |
| ASV_16s_10576 | 0.340693661 | 0.693434608  | 3.550770004 | 1.144178041  | NA          | NA |
| ASV_16s_10577 | 0.311238288 | -0.008260371 | 3.550193199 | 1.381973111  | NA          | NA |
| ASV_16s_10578 | 0.294313671 | -0.029527376 | 3.550238503 | 1.392758535  | NA          | NA |
| ASV_16s_10579 | 0.289772917 | -0.054100913 | 3.550227929 | 1.42474012   | NA          | NA |
| ASV_16s_10580 | 0.289807142 | -0.117991989 | 3.55016002  | 1.478050268  | NA          | NA |
| ASV_16s_10581 | 0.289824254 | -0.148564383 | 3.550134887 | 1.493122888  | NA          | NA |
| ASV_16s_10582 | 0.297420697 | -0.15912567  | 3.550095069 | 1.520019323  | NA          | NA |
| ASV_16s_10583 | 0.296925676 | -0.177963428 | 3.550085172 | 1.52327781   | 0.981492823 | NA |
| ASV_16s_10584 | 0.317413199 | -0.229725446 | 3.549983232 | 1.582882956  | 0.979300761 | NA |
| ASV_16s_10585 | 0.289852774 | -0.198503399 | 3.550103652 | 1.503786238  | 0.982178291 | NA |
| ASV_16s_10586 | 0.289858478 | -0.208439405 | 3.550098882 | 1.503772494  | 0.982178769 | NA |
| ASV_16s_10587 | 0.296447766 | -0.225952466 | 3.550064254 | 1.522184488  | 0.98153168  | NA |
| ASV_16s_10588 | 0.308843511 | -0.25814503  | 3.55000658  | 1.550312879  | 0.980516534 | NA |
| ASV_16s_10589 | 0.33427464  | -0.308891441 | 3.549909103 | 1.592339016  | 0.978939647 | NA |
| ASV_16s_10590 | 0.310385616 | -0.298184297 | 3.549992633 | 1.533462642  | 0.98112852  | NA |
| ASV_16s_10591 | 0.31154338  | -0.328947909 | 3.549985486 | 1.513029044  | 0.981855164 | NA |
| ASV_16s_10592 | 0.298018392 | -0.317517341 | 3.550038042 | 1.483570159  | 0.982873015 | NA |
| ASV_16s_10593 | 0.306092592 | -0.410473643 | 3.550016462 | 1.387883483  | 0.985939494 | NA |
| ASV_16s_10594 | 0.303876185 | -0.432591297 | 3.550032549 | 1.341782856  | NA          | NA |
| ASV_16s_10595 | 0.390545901 | -0.681813555 | 3.549876505 | 0.91018059   | 0.996150317 | NA |
| ASV_16s_10596 | 0.318016351 | -0.680665448 | 3.550134497 | 0.844153549  | 0.996966808 | NA |
| ASV_16s_10597 | 0.29005812  | -0.680073754 | 3.550267842 | 0.814669421  | NA          | NA |
| ASV_16s_10598 | 0.29005812  | -0.680073754 | 3.550267842 | 0.814669421  | NA          | NA |
| ASV_16s_10599 | 0.29005812  | -0.680073754 | 3.550267842 | 0.814669421  | NA          | NA |
| ASV_16s_10600 | 0.29005812  | -0.680073754 | 3.550267842 | 0.814669421  | NA          | NA |
| ASV_16s_10601 | 0.090649502 | -0.169376513 | 3.550799601 | 0.445299659  | 0.99962315  | NA |
| ASV_16s_10602 | 0.128828828 | 0.220102532  | 3.550801167 | 0.568344634  | NA          | NA |
| ASV_16s_10604 | 0.305936926 | -0.062804069 | 3.550012408 | 1.499677627  | 0.982320818 | NA |
| ASV_16s_10605 | 0.308466187 | -0.36259503  | 3.550156434 | 1.342908166  | NA          | NA |
| ASV_16s_10606 | 0.304255019 | 0.211017549  | 3.549937162 | 1.524441178  | 0.981451424 | NA |
| ASV_16s_10607 | 0.327488552 | -0.836948554 | 3.550102063 | 1.146893013  | 0.992098718 | NA |
| ASV_16s_10608 | 0.314568278 | 0.044308364  | 3.54962663  | 1.544519505  | 0.980728249 | NA |
| ASV_16s_10609 | 0.30125056  | 0.085979281  | 3.549594303 | 1.550707427  | 0.980502066 | NA |
| ASV_16s_10610 | 0.318238786 | -0.009728295 | 3.549460611 | 1.511833019  | 0.981897172 | NA |
| ASV_16s_10611 | 0.299350331 | -0.333761413 | 3.549698659 | 0.987591049  | NA          | NA |
| ASV_16s_10612 | 0.30513251  | 0.338007739  | 3.549811316 | 1.469831518  | 0.983335751 | NA |
| ASV_16s_10613 | 0.303983955 | 0.628180382  | 3.549585389 | 1.428200501  | 0.98469181  | NA |
| ASV_16s_10614 | 0.288002479 | 0.726659293  | 3.549954912 | 1.295463055  | 0.988560305 | NA |
| ASV_16s_10615 | 0.30410386  | -0.307496167 | 3.549586484 | 1.152750076  | NA          | NA |
| ASV_16s_10616 | 0.318436067 | 0.45459411   | 3.549346125 | 0.883288858  | 0.996498175 | NA |
| ASV_16s_10617 | 0.350777317 | -1.136861888 | 3.549757036 | 0.667937352  | NA          | NA |
| ASV_16s_10618 | 0.360233529 | -0.72308396  | 3.54975154  | 1.429490944  | 0.984650813 | NA |
| ASV_16s_10619 | 0.364112436 | -0.718910168 | 3.549754009 | 1.443523064  | 0.984200744 | NA |
| ASV_16s_10620 | 0.337008186 | -1.021656281 | 3.550048691 | 0.716438437  | 0.998206219 | NA |
| ASV_16s_10621 | 0.382244165 | -0.284525745 | 3.549479297 | 1.45195841   | 0.983926412 | NA |
| ASV_16s_10622 | 0.376090511 | 0.44729733   | 3.549402264 | 1.454953299  | NA          | NA |
| ASV_16s_10623 | 0.372072904 | -0.80705096  | 3.549727949 | 1.177819102  | 0.991428672 | NA |
| ASV_16s_10624 | 0.336490142 | 0.685961307  | 3.550740112 | 1.339586093  | 0.987350258 | NA |
| ASV_16s_10625 | 0.374533448 | -0.644886622 | 3.549918698 | 1.489337524  | 0.9826765   | NA |
| ASV_16s_10626 | 0.379082144 | -0.610617487 | 3.549993331 | 1.489334752  | 0.982676594 | NA |
| ASV_16s_10627 | 0.385065518 | -0.534682783 | 3.549687289 | 1.674037858  | 0.975666254 | NA |
| ASV_16s_10628 | 0.36003233  | -0.572059115 | 3.55010087  | 1.44821728   | 0.984048431 | NA |
| ASV_16s_10629 | 0.37582108  | -0.677155604 | 3.549661021 | 1.129631986  | NA          | NA |
| ASV_16s_10630 | 0.34756615  | 0.335717111  | 3.550518665 | 1.444491159  | 0.984169404 | NA |
| ASV_16s_10631 | 0.389029947 | -0.518247703 | 3.550203148 | 1.500417252  | 0.982295211 | NA |
| ASV_16s_10632 | 0.362592397 | -0.684193137 | 3.5505116   | 0.726170374  | 0.998126476 | NA |
| ASV_16s_10633 | 0.423203181 | -1.438613104 | 3.548878545 | 1.120357921  | NA          | NA |
| ASV_16s_10634 | 0.355524935 | 24.4631986   | 3.548522069 | -0.993621816 | NA          | NA |
| ASV_16s_10635 | 0.405830018 | -0.456277277 | 3.550301445 | 1.501569137  | 0.982255287 | NA |
| ASV_16s_10636 | 0.373415647 | 4.50E-04     | 3.550397807 | 1.310657193  | 0.98815203  | NA |
| ASV_16s_10637 | 0.470382351 | -0.331308877 | 3.548908437 | 0.898436669  | 0.996304864 | NA |
| ASV_16s_10638 | 0.335783911 | 0.355557777  | 3.55100418  | 0.953121653  | NA          | NA |
| ASV_16s_10639 | 0.350883423 | 0.499676177  | 3.549476953 | 1.034369257  | 0.994254896 | NA |
| ASV_16s_10640 | 0.401030874 | 1.4763665    | 3.550307855 | 0.762119258  | NA          | NA |
| ASV_16s_10641 | 0.352926355 | 1.949587587  | 3.549962378 | 0.4989175    | 0.999450435 | NA |
| ASV_16s_10642 | 0.332913732 | 2.041121607  | 3.549789341 | 0.399663729  | NA          | NA |

|               |             |              |             |             |             |    |
|---------------|-------------|--------------|-------------|-------------|-------------|----|
| ASV_16s_10643 | 0.297445894 | 1.143780996  | 3.550530603 | 0.862052845 | NA          | NA |
| ASV_16s_10644 | 0.555965008 | 1.532163897  | 3.54976559  | 1.224764403 | 0.99034548  | NA |
| ASV_16s_10645 | 0.378993767 | -1.002485125 | 3.549462115 | 1.02095032  | NA          | NA |
| ASV_16s_10646 | 0.201189887 | -1.038461333 | 3.550601165 | 0.362464212 | NA          | NA |
| ASV_16s_10647 | 0.311797831 | -0.214336261 | 3.549768446 | 0.751336922 | 0.997909447 | NA |
| ASV_16s_10648 | 0.422455158 | 1.336867542  | 3.550017959 | 0.82986973  | NA          | NA |
| ASV_16s_10649 | 0.407889292 | 0.418976202  | 3.550151508 | 0.838095153 | NA          | NA |
| ASV_16s_10650 | 0.277332503 | 0.418066192  | 3.55072218  | 0.714078852 | NA          | NA |
| ASV_16s_10651 | 0.204746785 | -0.541874156 | 3.550292412 | 0.611234911 | NA          | NA |
| ASV_16s_10652 | 0.200844112 | -0.279897109 | 3.550182224 | 0.769535502 | NA          | NA |
| ASV_16s_10653 | 0.148753935 | 1.153756594  | 3.551026025 | 0.478667785 | NA          | NA |
| ASV_16s_10654 | 0.308083859 | -0.079037446 | 3.550691987 | 1.154108495 | 0.991945442 | NA |
| ASV_16s_10655 | 0.202657184 | 0.220040349  | 3.55071946  | 0.783820661 | 0.997605584 | NA |
| ASV_16s_10656 | 0.214242412 | 0.487388612  | 3.550665976 | 0.936948403 | NA          | NA |
| ASV_16s_10657 | 0.298370892 | -0.069076594 | 3.550184806 | 1.549180604 | NA          | NA |
| ASV_16s_10658 | 0.37070923  | 0.376830328  | 3.551743709 | 0.523988536 | NA          | NA |
| ASV_16s_10659 | 0.31075885  | -0.068090438 | 3.550101361 | 1.543528281 | NA          | NA |
| ASV_16s_10660 | 0.393563788 | 1.202583404  | 3.550075959 | 0.85961534  | NA          | NA |
| ASV_16s_10661 | 0.405552386 | 0.345300295  | 3.550795771 | 0.759848624 | 0.997832449 | NA |
| ASV_16s_10662 | 0.38050858  | -0.549111679 | 3.549559887 | 0.808786438 | NA          | NA |
| ASV_16s_10663 | 0.359702084 | 0.91186589   | 3.549683917 | 1.360222075 | 0.986758592 | NA |
| ASV_16s_10664 | 0.320248416 | -0.105727888 | 3.550301717 | 1.419528105 | 0.984965615 | NA |
| ASV_16s_10665 | 0.541375468 | 0.400104046  | 3.549891726 | 2.003369215 | 0.959653655 | NA |
| ASV_16s_10666 | 0.492940234 | 0.235804074  | 3.54898117  | 1.718923641 | 0.97375016  | NA |
| ASV_16s_10667 | 0.456879538 | 0.641137954  | 3.55078563  | 1.720365763 | NA          | NA |
| ASV_16s_10668 | 0.558682098 | 0.337746631  | 3.549591653 | 2.104457686 | NA          | NA |
| ASV_16s_10669 | 0.391278366 | 0.346208674  | 3.550028754 | 1.630952152 | NA          | NA |
| ASV_16s_10670 | 0.332401461 | 0.329882177  | 3.550163212 | 1.554405582 | 0.980366144 | NA |
| ASV_16s_10671 | 0.369085    | 0.34339687   | 3.549916071 | 1.665094197 | NA          | NA |
| ASV_16s_10672 | 0.374281633 | 0.343601989  | 3.549935935 | 1.658618823 | NA          | NA |
| ASV_16s_10673 | 0.345437088 | 0.359794591  | 3.550639525 | 0.918680825 | NA          | NA |
| ASV_16s_10674 | 0.469247904 | 0.363340428  | 3.550297357 | 1.028864887 | NA          | NA |
| ASV_16s_10675 | 0.450899288 | 0.31593942   | 3.550746642 | 1.351638384 | 0.987006705 | NA |
| ASV_16s_10676 | 0.400124284 | 0.31593928   | 3.550766831 | 1.29088678  | 0.98868155  | NA |
| ASV_16s_10677 | 0.388831381 | 0.315939281  | 3.550772025 | 1.276419573 | 0.98905963  | NA |
| ASV_16s_10678 | 0.446140982 | 0.537720777  | 3.55072553  | 2.253835822 | 0.944466542 | NA |
| ASV_16s_10679 | 0.458639994 | 0.315939418  | 3.550743964 | 1.360223752 | 0.986758543 | NA |
| ASV_16s_10680 | 0.442579078 | 1.184949945  | 3.550186534 | 0.991498206 | NA          | NA |
| ASV_16s_10681 | 0.421950021 | 1.069008891  | 3.5504957   | 1.021683968 | 0.994471118 | NA |
| ASV_16s_10682 | 0.445816294 | 1.184984356  | 3.550179485 | 0.994227811 | 0.994921113 | NA |
| ASV_16s_10683 | 0.444436184 | 0.734773951  | 3.550817955 | 1.31966733  | NA          | NA |
| ASV_16s_10684 | 0.444436184 | 0.734773951  | 3.550817955 | 1.31966733  | NA          | NA |
| ASV_16s_10685 | 0.375086938 | 0.693501708  | 3.550750105 | 1.192877902 | 0.991089959 | NA |
| ASV_16s_10686 | 0.387697876 | 0.693521335  | 3.550743691 | 1.209629105 | 0.990703497 | NA |
| ASV_16s_10687 | 0.391871714 | 0.693527816  | 3.550741659 | 1.215050403 | 0.990576227 | NA |
| ASV_16s_10688 | 0.285681887 | -0.034661044 | 3.550272489 | 1.382951646 | NA          | NA |
| ASV_16s_10689 | 0.285710408 | -0.090221481 | 3.550205728 | 1.446655229 | NA          | NA |
| ASV_16s_10690 | 0.292046481 | -0.111216502 | 3.550156334 | 1.480519439 | NA          | NA |
| ASV_16s_10691 | 0.292046481 | -0.111216502 | 3.550156334 | 1.480519439 | NA          | NA |
| ASV_16s_10692 | 0.302379541 | -0.126945279 | 3.550098939 | 1.515202737 | NA          | NA |
| ASV_16s_10693 | 0.289266823 | -0.117125561 | 3.550163259 | 1.47577803  | NA          | NA |
| ASV_16s_10694 | 0.304385953 | -0.168276889 | 3.550061113 | 1.539909661 | NA          | NA |
| ASV_16s_10695 | 0.293341075 | -0.163425503 | 3.550109318 | 1.508810161 | NA          | NA |
| ASV_16s_10696 | 0.291884531 | -0.270493001 | 3.550071195 | 1.494272495 | 0.982507283 | NA |
| ASV_16s_10697 | 0.333810996 | -0.308509019 | 3.54991067  | 1.591321543 | 0.97897868  | NA |
| ASV_16s_10698 | 0.30898579  | -0.296916956 | 3.549998093 | 1.530182336 | 0.981246314 | NA |
| ASV_16s_10699 | 0.312394323 | -0.329629421 | 3.549982384 | 1.514772227 | 0.981793835 | NA |
| ASV_16s_10700 | 0.333559537 | -0.345836203 | 3.549909561 | 1.557160176 | 0.980264539 | NA |
| ASV_16s_10701 | 0.306348665 | -0.334889341 | 3.55000485  | 1.493017815 | 0.982550398 | NA |
| ASV_16s_10702 | 0.30790492  | -0.356917624 | 3.549999731 | 1.47592572  | 0.983131426 | NA |
| ASV_16s_10703 | 0.317278131 | -0.363851249 | 3.549965858 | 1.494244369 | 0.982508251 | NA |
| ASV_16s_10704 | 0.294715527 | -0.35745154  | 3.550051945 | 1.436744481 | 0.98441914  | NA |
| ASV_16s_10705 | 0.290169069 | -0.376369626 | 3.550073619 | 1.394959998 | 0.985725135 | NA |
| ASV_16s_10706 | 0.321834324 | -0.466797919 | 3.549978236 | 1.322911345 | 0.987816328 | NA |
| ASV_16s_10707 | 0.102089091 | -0.418855216 | 3.551415825 | 0.469839172 | NA          | NA |
| ASV_16s_10708 | 0.39282097  | -0.681843116 | 3.549870017 | 0.912016529 | 0.996125784 | NA |
| ASV_16s_10709 | 0.357157095 | -0.681113273 | 3.549982331 | 0.881405425 | NA          | NA |

|               |             |              |             |             |             |    |
|---------------|-------------|--------------|-------------|-------------|-------------|----|
| ASV_16s_10710 | 0.303697829 | -0.680376624 | 3.550199781 | 0.829378006 | NA          | NA |
| ASV_16s_10711 | 0.288251728 | -0.679749481 | 3.550277249 | 0.812618129 | NA          | NA |
| ASV_16s_10712 | 0.285972795 | -0.679694947 | 3.550289395 | 0.810079155 | NA          | NA |
| ASV_16s_10713 | 0.091112761 | -0.169383036 | 3.550798121 | 0.447323884 | NA          | NA |
| ASV_16s_10714 | 0.089026639 | -0.100752851 | 3.550797875 | 0.58960604  | 0.999047773 | NA |
| ASV_16s_10715 | 0.31093354  | 0.478540215  | 3.549904964 | 1.485642399 | 0.98280256  | NA |
| ASV_16s_10716 | 0.344212102 | -0.053749344 | 3.549557037 | 1.445353205 | NA          | NA |
| ASV_16s_10717 | 0.327959992 | -0.327838786 | 3.549450859 | 1.105044496 | 0.992951514 | NA |
| ASV_16s_10718 | 0.414377257 | 1.504168954  | 3.549949585 | 0.80584378  | 0.997383857 | NA |
| ASV_16s_10719 | 0.360463191 | 0.282520569  | 3.549740412 | 2.130383346 | 0.952272629 | NA |
| ASV_16s_10720 | 0.384289802 | -0.782106192 | 3.549506905 | 1.382893481 | 0.986089468 | NA |
| ASV_16s_10721 | 0.36653768  | -0.771161683 | 3.549598144 | 1.366680721 | 0.986570014 | NA |
| ASV_16s_10722 | 0.384807139 | -0.771357595 | 3.549546009 | 1.43112499  | 0.984598805 | NA |
| ASV_16s_10723 | 0.306213527 | 0.772275272  | 3.549400951 | 0.741964026 | NA          | NA |
| ASV_16s_10724 | 0.34132228  | 0.19074762   | 3.549912871 | 1.643030712 | 0.97694107  | NA |
| ASV_16s_10725 | 0.306974261 | -0.150257997 | 3.550080026 | 1.263830289 | NA          | NA |
| ASV_16s_10726 | 0.362095587 | -0.629928924 | 3.54996548  | 1.462393608 | 0.983583109 | NA |
| ASV_16s_10727 | 0.369008543 | -0.641700735 | 3.549931504 | 1.476769617 | 0.983103014 | NA |
| ASV_16s_10728 | 0.288995037 | 0.484150087  | 3.550400025 | 0.768922972 | NA          | NA |
| ASV_16s_10729 | 0.306530754 | -0.070919256 | 3.551046212 | 0.881470702 | NA          | NA |
| ASV_16s_10730 | 0.352637943 | 0.198162104  | 3.550204254 | 1.555676454 | 0.980319306 | NA |
| ASV_16s_10731 | 0.370725551 | -0.561313854 | 3.550118181 | 1.45737719  | 0.983748686 | NA |
| ASV_16s_10732 | 0.35526517  | -0.495625412 | 3.550264733 | 1.402215026 | 0.985503324 | NA |
| ASV_16s_10733 | 0.386594786 | 0.168258808  | 3.550480502 | 1.420862617 | 0.984923676 | NA |
| ASV_16s_10734 | 0.351957157 | -0.11227119  | 3.550257311 | 1.470818243 | 0.983302769 | NA |
| ASV_16s_10735 | 0.377582655 | -0.89745743  | 3.54985395  | 1.025559289 | NA          | NA |
| ASV_16s_10736 | 0.33420895  | -0.087632951 | 3.550642802 | 1.283581384 | 0.988873456 | NA |
| ASV_16s_10737 | 0.346638294 | -0.336182447 | 3.550521557 | 1.343431165 | 0.987241264 | NA |
| ASV_16s_10738 | 0.27542739  | 0.711807312  | 3.550250101 | 0.840474504 | NA          | NA |
| ASV_16s_10739 | 0.292680121 | -0.497387392 | 3.550519211 | 0.872883595 | 0.996627073 | NA |
| ASV_16s_10740 | 0.477343043 | 0.672721751  | 3.550059385 | 0.92955319  | NA          | NA |
| ASV_16s_10741 | 0.373032034 | 1.668146081  | 3.549997458 | 0.845744656 | NA          | NA |
| ASV_16s_10742 | 0.312280541 | 1.659060523  | 3.550092657 | 0.602645935 | NA          | NA |
| ASV_16s_10743 | 0.341520601 | 1.926105035  | 3.550015041 | 0.493828148 | NA          | NA |
| ASV_16s_10744 | 0.457005993 | 0.872010618  | 3.550467647 | 1.117671627 | 0.992700653 | NA |
| ASV_16s_10745 | 0.335157382 | 1.377395652  | 3.550160094 | 0.998022167 | NA          | NA |
| ASV_16s_10746 | 0.240139624 | 0.384906506  | 3.551269899 | 0.733346769 | NA          | NA |
| ASV_16s_10747 | 0.369984931 | -0.617439433 | 3.549755169 | 1.065515379 | NA          | NA |
| ASV_16s_10748 | 0.367584122 | 0.969036893  | 3.550527943 | 1.092692962 | 0.993191558 | NA |
| ASV_16s_10749 | 0.18557775  | 1.218497531  | 3.550849627 | 0.55304209  | NA          | NA |
| ASV_16s_10750 | 0.291814692 | 0.418771154  | 3.550639373 | 0.730486597 | NA          | NA |
| ASV_16s_10751 | 0.321376687 | 0.418837385  | 3.550482197 | 0.761461125 | NA          | NA |
| ASV_16s_10752 | 0.10300816  | 0.347844458  | 3.551682577 | 0.396441753 | NA          | NA |
| ASV_16s_10753 | 0.10300816  | 0.347844458  | 3.551682577 | 0.396441753 | NA          | NA |
| ASV_16s_10754 | 0.166213948 | -0.525800147 | 3.55062148  | 0.545361626 | NA          | NA |
| ASV_16s_10755 | 0.394878712 | -0.018561936 | 3.549458352 | 1.522681102 | NA          | NA |
| ASV_16s_10756 | 0.201863028 | -0.54106115  | 3.550313678 | 0.60670452  | NA          | NA |
| ASV_16s_10757 | 0.185003122 | -0.535200543 | 3.550448344 | 0.579041303 | NA          | NA |
| ASV_16s_10758 | 0.282443544 | -0.078982992 | 3.550708077 | 1.110192595 | NA          | NA |
| ASV_16s_10759 | 0.200659715 | 0.220041475  | 3.550720883 | 0.778900384 | 0.997653366 | NA |
| ASV_16s_10760 | 0.293926962 | -0.58111001  | 3.550209721 | 0.667265652 | 0.998574804 | NA |
| ASV_16s_10761 | 0.287004536 | -0.483449504 | 3.550180351 | 0.796175778 | NA          | NA |
| ASV_16s_10762 | 0.28098993  | -1.113771416 | 3.549872694 | 0.862139487 | 0.996756881 | NA |
| ASV_16s_10763 | 0.296989764 | -0.069189566 | 3.550278208 | 1.514415284 | 0.981806403 | NA |
| ASV_16s_10764 | 0.293840465 | -0.06907745  | 3.550219366 | 1.528405488 | NA          | NA |
| ASV_16s_10765 | 0.298397813 | -0.270746095 | 3.549477857 | 1.13042291  | NA          | NA |
| ASV_16s_10766 | 0.318142909 | -0.069179524 | 3.550157775 | 1.597894825 | NA          | NA |
| ASV_16s_10767 | 0.320957002 | -0.068124369 | 3.550078589 | 1.546618732 | NA          | NA |
| ASV_16s_10768 | 0.313582646 | 0.505121949  | 3.550503802 | 1.231326193 | NA          | NA |
| ASV_16s_10769 | 0.291473997 | 0.36413714   | 3.551567728 | 0.59698267  | NA          | NA |
| ASV_16s_10770 | 0.417276082 | 1.19847184   | 3.55037594  | 0.867838219 | NA          | NA |
| ASV_16s_10771 | 0.54022451  | -0.104091484 | 3.549484013 | 1.807679209 | 0.969714262 | NA |
| ASV_16s_10772 | 0.345501788 | -0.112394914 | 3.550212771 | 1.26472244  | 0.989359543 | NA |
| ASV_16s_10773 | 0.3372344   | -0.275016051 | 3.550621339 | 1.026953508 | 0.994381942 | NA |
| ASV_16s_10774 | 0.553922245 | 0.559600086  | 3.549708712 | 1.879549877 | NA          | NA |
| ASV_16s_10775 | 0.384963726 | 0.358729967  | 3.550220449 | 1.543292891 | 0.980772899 | NA |
| ASV_16s_10776 | 0.385934048 | 0.354841612  | 3.550126193 | 1.622449812 | 0.977765268 | NA |

|               |             |              |             |             |             |    |
|---------------|-------------|--------------|-------------|-------------|-------------|----|
| ASV_16s_10777 | 0.421504647 | 0.346706275  | 3.550011145 | 1.646058839 | 0.976818326 | NA |
| ASV_16s_10778 | 0.356740328 | 0.360387836  | 3.550878842 | 1.27175431  | NA          | NA |
| ASV_16s_10779 | 0.33778976  | 0.346422314  | 3.55076841  | 0.933780158 | NA          | NA |
| ASV_16s_10780 | 0.317129827 | 0.360376946  | 3.55091432  | 1.212086956 | NA          | NA |
| ASV_16s_10781 | 0.317129827 | 0.360376946  | 3.55091432  | 1.212086956 | NA          | NA |
| ASV_16s_10782 | 0.372442835 | 0.315939312  | 3.55078013  | 1.254602032 | 0.989614885 | NA |
| ASV_16s_10783 | 0.366186468 | 0.315939313  | 3.550783416 | 1.246010126 | 0.989828656 | NA |
| ASV_16s_10784 | 0.446639568 | 0.315939306  | 3.550748172 | 1.346701949 | 0.987148099 | NA |
| ASV_16s_10785 | 0.385180755 | 0.31593931   | 3.550773775 | 1.271614033 | 0.989183467 | NA |
| ASV_16s_10786 | 0.344233381 | 0.31593947   | 3.550795888 | 1.214673231 | 0.990585116 | NA |
| ASV_16s_10787 | 0.398186168 | 0.315939309  | 3.550767704 | 1.288417253 | 0.988746648 | NA |
| ASV_16s_10788 | 0.394694563 | 0.315939309  | 3.550769293 | 1.283975183 | 0.988863163 | NA |
| ASV_16s_10789 | 0.410584153 | 0.315939442  | 3.550762274 | 1.303939668 | 0.988333619 | NA |
| ASV_16s_10790 | 0.400980382 | 0.917421411  | 3.550356539 | 1.810643101 | 0.969573812 | NA |
| ASV_16s_10791 | 0.503893768 | 1.179933752  | 3.550046027 | 1.023058551 | 0.994447944 | NA |
| ASV_16s_10792 | 0.438176519 | 0.734762065  | 3.550821412 | 1.31244676  | NA          | NA |
| ASV_16s_10793 | 0.404304181 | 0.69355106   | 3.55073585  | 1.2309052   | 0.990197817 | NA |
| ASV_16s_10794 | 0.444299385 | 0.693607891  | 3.550719366 | 1.278756715 | 0.988999088 | NA |
| ASV_16s_10795 | 0.356244831 | 0.693466101  | 3.550760539 | 1.166736285 | 0.991672729 | NA |
| ASV_16s_10796 | 0.374048717 | 0.693497308  | 3.550750657 | 1.191440652 | 0.991122641 | NA |
| ASV_16s_10797 | 0.423983585 | 0.693578285  | 3.550727354 | 1.254985966 | 0.989605268 | NA |
| ASV_16s_10798 | 0.346262678 | 0.693445533  | 3.550766523 | 1.152337142 | 0.991983242 | NA |
| ASV_16s_10799 | 0.408635397 | 0.693557722  | 3.550733916 | 1.236261504 | 0.990067879 | NA |
| ASV_16s_10800 | 0.286413347 | -0.047530131 | 3.550252124 | 1.393791789 | NA          | NA |
| ASV_16s_10801 | 0.287190103 | -0.082037975 | 3.550207665 | 1.441210177 | NA          | NA |
| ASV_16s_10802 | 0.28163649  | -0.104705931 | 3.550210169 | 1.444439459 | NA          | NA |
| ASV_16s_10803 | 0.288743616 | -0.14698043  | 3.550140919 | 1.488990265 | NA          | NA |
| ASV_16s_10804 | 0.289261454 | -0.167838124 | 3.550123998 | 1.497344525 | NA          | NA |
| ASV_16s_10805 | 0.298345552 | -0.208686045 | 3.550063619 | 1.5294111   | 0.981273945 | NA |
| ASV_16s_10806 | 0.29003821  | -0.198706646 | 3.550102847 | 1.504217174 | 0.982163302 | NA |
| ASV_16s_10807 | 0.294755132 | -0.21421534  | 3.550075903 | 1.518212299 | 0.981672444 | NA |
| ASV_16s_10808 | 0.300681306 | -0.220997242 | 3.550049213 | 1.535550007 | 0.981053336 | NA |
| ASV_16s_10809 | 0.317190491 | -0.256914624 | 3.54997659  | 1.574810831 | 0.979606123 | NA |
| ASV_16s_10810 | 0.285497457 | -0.223277178 | 3.55011166  | 1.488654781 | 0.982699833 | NA |
| ASV_16s_10811 | 0.286769235 | -0.234841551 | 3.550101952 | 1.49056585  | 0.982634473 | NA |
| ASV_16s_10812 | 0.310192416 | -0.297990809 | 3.549993468 | 1.532909336 | 0.981148419 | NA |
| ASV_16s_10813 | 0.313996108 | -0.311103524 | 3.549977859 | 1.5343894   | 0.981095161 | NA |
| ASV_16s_10814 | 0.30536148  | -0.303594037 | 3.550010835 | 1.515114785 | 0.981781769 | NA |
| ASV_16s_10815 | 0.303802483 | -0.322492721 | 3.550015052 | 1.496291897 | 0.982437756 | NA |
| ASV_16s_10816 | 0.288334156 | -0.319442571 | 3.550078179 | 1.453226626 | 0.983884922 | NA |
| ASV_16s_10817 | 0.312249945 | -0.33960057  | 3.549982842 | 1.505246172 | 0.982127482 | NA |
| ASV_16s_10818 | 0.318800922 | -0.364939868 | 3.549960576 | 1.497124752 | 0.981053034 | NA |
| ASV_16s_10819 | 0.33085058  | -0.373301635 | 3.549920291 | 1.51949006  | 0.981627234 | NA |
| ASV_16s_10820 | 0.289870557 | -0.353552858 | 3.550071997 | 1.426521812 | 0.984745043 | NA |
| ASV_16s_10821 | 0.366427864 | -0.68148142  | 3.549951154 | 0.889650904 | 0.996417807 | NA |
| ASV_16s_10822 | 0.364573282 | -0.681454017 | 3.549957292 | 0.888020045 | NA          | NA |
| ASV_16s_10823 | 0.293788564 | -0.680157249 | 3.550248703 | 0.818727228 | NA          | NA |
| ASV_16s_10824 | 0.08981115  | -0.169366318 | 3.550802336 | 0.441571206 | NA          | NA |
| ASV_16s_10825 | 0.149434741 | 0.1745256    | 3.550749112 | 0.842157224 | 0.996989545 | NA |
| ASV_16s_10826 | 0.28572627  | 0.001157902  | 3.550096017 | 1.429678981 | 0.984644834 | NA |
| ASV_16s_10827 | 0.31079327  | 0.109405498  | 3.54981766  | 1.538999372 | 0.980928706 | NA |
| ASV_16s_10828 | 0.291868624 | -0.020295992 | 3.54989105  | 1.395897794 | 0.98569658  | NA |
| ASV_16s_10829 | 0.373574375 | -0.778955553 | 3.549721496 | 1.043801388 | 0.994090677 | NA |
| ASV_16s_10830 | 0.141080427 | 1.193008692  | 3.551468852 | 0.381451239 | 0.999775294 | NA |
| ASV_16s_10831 | 0.366163895 | -0.784196704 | 3.54968615  | 1.096650401 | 0.99311522  | NA |
| ASV_16s_10832 | 0.367540381 | -0.790644519 | 3.549602466 | 1.191928628 | 0.991111553 | NA |
| ASV_16s_10833 | 0.375542765 | -0.790638908 | 3.54953629  | 1.246913965 | 0.989806297 | NA |
| ASV_16s_10834 | 0.375090795 | -0.7565177   | 3.549636276 | 1.436659621 | 0.984421862 | NA |
| ASV_16s_10835 | 0.373984128 | -0.716961077 | 3.549743044 | 1.471399923 | NA          | NA |
| ASV_16s_10836 | 0.350331501 | -0.681405685 | 3.549872397 | 1.426071232 | 0.984759312 | NA |
| ASV_16s_10837 | 0.325750514 | -0.508884805 | 3.549374094 | 0.774578103 | 0.997694819 | NA |
| ASV_16s_10838 | 0.363211651 | -0.599410016 | 3.550033673 | 1.455043441 | 0.983825372 | NA |
| ASV_16s_10839 | 0.396629797 | -0.658396469 | 3.549671895 | 1.161980433 | 0.991776107 | NA |
| ASV_16s_10840 | 0.191817172 | -0.521669393 | 3.55100415  | 0.679380508 | NA          | NA |
| ASV_16s_10841 | 0.356006515 | 0.18250445   | 3.549500542 | 1.412584742 | NA          | NA |
| ASV_16s_10842 | 0.329574369 | -0.093826171 | 3.550658648 | 1.237069428 | NA          | NA |
| ASV_16s_10843 | 0.345554604 | 0.347133701  | 3.551204926 | 0.810897038 | NA          | NA |



|               |             |              |             |             |             |    |
|---------------|-------------|--------------|-------------|-------------|-------------|----|
| ASV_16s_10844 | 0.320991668 | 0.063543441  | 3.55055594  | 1.234925239 | NA          | NA |
| ASV_16s_10845 | 0.368183091 | 0.230293962  | 3.54943084  | 1.282713942 | NA          | NA |
| ASV_16s_10846 | 0.38124909  | 1.76843388   | 3.550053712 | 0.801815728 | NA          | NA |
| ASV_16s_10847 | 0.330618221 | 1.714418336  | 3.550331033 | 0.573841625 | NA          | NA |
| ASV_16s_10848 | 0.448651739 | 0.489039399  | 3.549930781 | 0.961476351 | NA          | NA |
| ASV_16s_10849 | 0.417319014 | 0.539940393  | 3.550644522 | 1.129980272 | 0.992450766 | NA |
| ASV_16s_10850 | 0.321309696 | 0.183132252  | 3.54970562  | 1.410311703 | 0.985253332 | NA |
| ASV_16s_10851 | 0.404058095 | -0.363365083 | 3.326093523 | 0.910772981 | 0.996142412 | NA |
| ASV_16s_10852 | 0.279472569 | 0.541989676  | 3.549611288 | 0.931565593 | NA          | NA |
| ASV_16s_10853 | 0.301872206 | 1.303139821  | 3.550316892 | 1.039961248 | NA          | NA |
| ASV_16s_10854 | 0.257055721 | 0.635042317  | 3.551021731 | 0.987280608 | NA          | NA |
| ASV_16s_10855 | 0.248836184 | -0.171617471 | 3.550112959 | 1.090748631 | NA          | NA |
| ASV_16s_10856 | 0.399821847 | 0.719893667  | 3.549631055 | 1.535151799 | NA          | NA |
| ASV_16s_10857 | 0.236709058 | 0.384257546  | 3.551290192 | 0.728490372 | NA          | NA |
| ASV_16s_10858 | 0.273301087 | 0.217807629  | 3.550785668 | 0.386843922 | 0.999764468 | NA |
| ASV_16s_10859 | 0.346153317 | -0.104043547 | 3.549151862 | 1.455353188 | NA          | NA |
| ASV_16s_10860 | 0.245492612 | -0.8049869   | 3.550269538 | 0.749736262 | 0.997923722 | NA |
| ASV_16s_10861 | 0.341367999 | 0.418875633  | 3.550391097 | 0.780847864 | 0.997634529 | NA |
| ASV_16s_10862 | 0.181189777 | -0.368530154 | 3.550359343 | 0.732960184 | NA          | NA |
| ASV_16s_10863 | 0.163839463 | -0.523539904 | 3.550642081 | 0.540773871 | NA          | NA |
| ASV_16s_10864 | 0.19897927  | -0.54022848  | 3.550335513 | 0.602123334 | NA          | NA |
| ASV_16s_10865 | 0.18236022  | -0.534057592 | 3.550471248 | 0.574463131 | NA          | NA |
| ASV_16s_10866 | 0.18236022  | -0.534057592 | 3.550471248 | 0.574463131 | NA          | NA |
| ASV_16s_10867 | 0.18236022  | -0.534057592 | 3.550471248 | 0.574463131 | NA          | NA |
| ASV_16s_10868 | 0.278408636 | -0.07897371  | 3.550710881 | 1.102914872 | NA          | NA |
| ASV_16s_10869 | 0.196739462 | 0.220043517  | 3.550723758 | 0.769142861 | 0.997746256 | NA |
| ASV_16s_10870 | 0.207265604 | 0.220038002  | 3.550716289 | 0.794925237 | NA          | NA |
| ASV_16s_10871 | 0.228266036 | 0.276433022  | 3.550646044 | 0.756030129 | NA          | NA |
| ASV_16s_10872 | 0.385208628 | 0.338282151  | 3.551991018 | 0.331209722 | 0.999860247 | NA |
| ASV_16s_10873 | 0.296126178 | -0.069336827 | 3.550396418 | 1.473009854 | 0.983229374 | NA |
| ASV_16s_10874 | 0.288814521 | -0.069152717 | 3.550289567 | 1.494071831 | NA          | NA |
| ASV_16s_10875 | 0.288814521 | -0.069152717 | 3.550289567 | 1.494071831 | NA          | NA |
| ASV_16s_10876 | 0.299220406 | -0.068467819 | 3.550054191 | 1.55139684  | NA          | NA |
| ASV_16s_10877 | 0.300211442 | -0.068346624 | 3.55007305  | 1.541818078 | NA          | NA |
| ASV_16s_10878 | 0.343749013 | 0.135069657  | 3.549902217 | 2.214448564 | 0.947024012 | NA |
| ASV_16s_10879 | 0.352854042 | 0.309386735  | 3.550320305 | 0.871677851 | 0.996641806 | NA |
| ASV_16s_10880 | 0.401617904 | 0.42997209   | 3.549415999 | 1.277895669 | 0.989021416 | NA |
| ASV_16s_10881 | 0.312995824 | -0.067930569 | 3.550136847 | 1.50850817  | NA          | NA |
| ASV_16s_10882 | 0.307148699 | -0.048270462 | 3.550556195 | 1.352573537 | NA          | NA |
| ASV_16s_10883 | 0.139381473 | 0.281250927  | 3.551658031 | 0.560818833 | NA          | NA |
| ASV_16s_10884 | 0.27451476  | -0.596420088 | 3.550846759 | 0.784879667 | NA          | NA |
| ASV_16s_10885 | 0.388597849 | 0.385590513  | 3.55072846  | 1.264482544 | 0.98936564  | NA |
| ASV_16s_10886 | 0.359183413 | 1.260531251  | 3.549888794 | 1.368029196 | NA          | NA |
| ASV_16s_10887 | 0.348288306 | 1.120355294  | 3.55016207  | 1.316246837 | NA          | NA |
| ASV_16s_10888 | 0.372883594 | 0.635831094  | 3.55011446  | 2.244381237 | 0.945086125 | NA |
| ASV_16s_10889 | 0.312944596 | 0.337811988  | 3.550033515 | 1.568853371 | NA          | NA |
| ASV_16s_10890 | 0.413629208 | 0.784035302  | 3.549368233 | 1.432860947 | 0.984543438 | NA |
| ASV_16s_10891 | 0.405129671 | 0.719387895  | 3.55069034  | 1.354398249 | 0.986927243 | NA |
| ASV_16s_10892 | 0.443275933 | 0.363326648  | 3.550357333 | 1.008177214 | 0.994695546 | NA |
| ASV_16s_10893 | 0.360726833 | 0.340551074  | 3.550793789 | 0.991967048 | 0.99495708  | NA |
| ASV_16s_10894 | 0.312599401 | 0.360375531  | 3.550918953 | 1.204774703 | NA          | NA |
| ASV_16s_10895 | 0.352371885 | 0.502635805  | 3.550854859 | 2.044931614 | NA          | NA |
| ASV_16s_10896 | 0.35792105  | 0.315939341  | 3.550787937 | 1.2344089   | 0.990112941 | NA |
| ASV_16s_10897 | 0.339159329 | 0.315939486  | 3.550799004 | 1.207123912 | 0.990761945 | NA |
| ASV_16s_10898 | 0.337106156 | 0.315939487  | 3.550800289 | 1.204046058 | 0.99083344  | NA |
| ASV_16s_10899 | 0.365495408 | 0.31593934   | 3.550783799 | 1.244965329 | 0.989854463 | NA |
| ASV_16s_10900 | 0.439613715 | 0.596303447  | 3.550612467 | 1.105180606 | NA          | NA |
| ASV_16s_10901 | 0.423839255 | 1.185018837  | 3.55017204  | 0.957523702 | 0.995484947 | NA |
| ASV_16s_10902 | 0.434192102 | 0.734753407  | 3.550823665 | 1.307787529 | 0.988229814 | NA |
| ASV_16s_10903 | 0.431916854 | 0.734748883  | 3.550824968 | 1.305122481 | NA          | NA |
| ASV_16s_10904 | 0.431916854 | 0.734748883  | 3.550824968 | 1.305122481 | NA          | NA |
| ASV_16s_10905 | 0.431916854 | 0.734748883  | 3.550824968 | 1.305122481 | NA          | NA |
| ASV_16s_10906 | 0.356042059 | 0.898260416  | 3.55073013  | 1.033858225 | 0.994263709 | NA |
| ASV_16s_10907 | 0.406661582 | 0.693554913  | 3.550734791 | 1.23383695  | 0.990126827 | NA |
| ASV_16s_10908 | 0.409964061 | 0.693559963  | 3.550733324 | 1.23793956  | 0.990026952 | NA |
| ASV_16s_10909 | 0.384123558 | 0.69351815   | 3.550745471 | 1.204905593 | 0.990813509 | NA |
| ASV_16s_10910 | 0.3678381   | 0.69348882   | 3.550753999 | 1.182939751 | 0.991314416 | NA |

|               |             |              |             |             |             |    |
|---------------|-------------|--------------|-------------|-------------|-------------|----|
| ASV_16s_10911 | 0.365332645 | 0.693484079  | 3.550755378 | 1.17947539  | 0.991391819 | NA |
| ASV_16s_10912 | 0.277539756 | -0.075511256 | 3.550261437 | 1.409680818 | NA          | NA |
| ASV_16s_10913 | 0.280589742 | -0.102920961 | 3.550216989 | 1.439905228 | NA          | NA |
| ASV_16s_10914 | 0.284146157 | -0.129841567 | 3.550175415 | 1.466879785 | NA          | NA |
| ASV_16s_10915 | 0.301455217 | -0.174044455 | 3.550069305 | 1.532415796 | NA          | NA |
| ASV_16s_10916 | 0.277579685 | -0.151279394 | 3.550188874 | 1.455537088 | NA          | NA |
| ASV_16s_10917 | 0.28569967  | -0.193249389 | 3.550124604 | 1.490319608 | 0.982642903 | NA |
| ASV_16s_10918 | 0.296842833 | -0.226338338 | 3.550062716 | 1.521035909 | 0.981572449 | NA |
| ASV_16s_10919 | 0.297113818 | -0.236380574 | 3.550058156 | 1.521870558 | 0.981542828 | NA |
| ASV_16s_10920 | 0.281929969 | -0.239521456 | 3.550121854 | 1.47427427  | 0.983186942 | NA |
| ASV_16s_10921 | 0.283207451 | -0.261502223 | 3.550110365 | 1.471215323 | 0.983289486 | NA |
| ASV_16s_10922 | 0.277659542 | -0.298450622 | 3.550127852 | 1.435038077 | NA          | NA |
| ASV_16s_10923 | 0.311006803 | -0.348854889 | 3.549987715 | 1.492712061 | 0.982560896 | NA |
| ASV_16s_10924 | 0.295600453 | -0.336478027 | 3.550047372 | 1.460476647 | 0.983646501 | NA |
| ASV_16s_10925 | 0.28298846  | -0.32549333  | 3.550101309 | 1.432251648 | 0.984562885 | NA |
| ASV_16s_10926 | 0.281745203 | -0.369795009 | 3.55010974  | 1.37753145  | 0.986249536 | NA |
| ASV_16s_10927 | 0.369444644 | -0.681511687 | 3.549941339 | 0.892266673 | 0.996384419 | NA |
| ASV_16s_10928 | 0.284132513 | -0.679930854 | 3.55029961  | 0.808015235 | NA          | NA |
| ASV_16s_10929 | 0.179818879 | 0.220054204  | 3.550737596 | 0.725062514 | NA          | NA |
| ASV_16s_10930 | 0.093325671 | 0.220167061  | 3.550886252 | 0.431575818 | NA          | NA |
| ASV_16s_10931 | 0.093325671 | 0.220167061  | 3.550886252 | 0.431575818 | NA          | NA |
| ASV_16s_10933 | 0.19657011  | 0.596101515  | 3.550689709 | 0.701212135 | NA          | NA |
| ASV_16s_10934 | 0.19657011  | 0.596101515  | 3.550689709 | 0.701212135 | NA          | NA |
| ASV_16s_10935 | 0.314549937 | -0.176587471 | 3.550017644 | 1.569699444 | 0.979798102 | NA |
| ASV_16s_10936 | 0.296485944 | -0.0124501   | 3.549986625 | 1.482713602 | 0.982902086 | NA |
| ASV_16s_10937 | 0.304404072 | 0.074645037  | 3.549949645 | 1.533611436 | 0.981123166 | NA |
| ASV_16s_10938 | 0.280802353 | -0.398082447 | 3.55004507  | 0.829458398 | NA          | NA |
| ASV_16s_10939 | 0.305238906 | 0.203196066  | 3.54958881  | 1.619923371 | 0.977865239 | NA |
| ASV_16s_10940 | 0.288230068 | -0.016157193 | 3.55004122  | 0.885147581 | NA          | NA |
| ASV_16s_10941 | 0.315033787 | 0.07927237   | 3.549716767 | 0.951220779 | 0.995577505 | NA |
| ASV_16s_10942 | 0.366369    | -0.788000612 | 3.549579526 | 1.255505682 | 0.989592241 | NA |
| ASV_16s_10943 | 0.303021968 | -0.327970611 | 3.54995595  | 0.954044837 | NA          | NA |
| ASV_16s_10944 | 0.290458963 | 0.2898816    | 3.551715014 | 0.625289448 | NA          | NA |
| ASV_16s_10945 | 0.396561949 | -0.790856369 | 3.54941867  | 1.328434364 | 0.987663142 | NA |
| ASV_16s_10946 | 0.370907255 | 0.715186112  | 3.548922189 | 1.559126535 | NA          | NA |
| ASV_16s_10947 | 0.291285723 | -0.626459578 | 3.550253234 | 1.204921089 | NA          | NA |
| ASV_16s_10948 | 0.29981789  | -0.662413543 | 3.550124812 | 1.296080057 | NA          | NA |
| ASV_16s_10949 | 0.3152996   | 0.57766175   | 3.549885721 | 1.171725941 | 0.991563397 | NA |
| ASV_16s_10950 | 0.236581936 | 0.388809944  | 3.549974933 | 1.035263107 | NA          | NA |
| ASV_16s_10951 | 0.454110476 | 1.401081485  | 3.550010187 | 1.213430265 | NA          | NA |
| ASV_16s_10952 | 0.403802434 | -1.493540435 | 3.548857563 | 0.955209791 | 0.99551907  | NA |
| ASV_16s_10953 | 0.355001967 | -0.69546889  | 3.549826629 | 1.432106806 | 0.984567505 | NA |
| ASV_16s_10954 | 0.358401634 | -0.692673916 | 3.549828901 | 1.442568135 | 0.984231621 | NA |
| ASV_16s_10955 | 0.30350366  | 0.685788039  | 3.550797823 | 1.260911612 | NA          | NA |
| ASV_16s_10956 | 0.347698306 | -0.614971797 | 3.550015095 | 1.430617985 | 0.984614953 | NA |
| ASV_16s_10957 | 0.36243088  | 0.371086083  | 3.550371529 | 1.318715088 | 0.987931932 | NA |
| ASV_16s_10958 | 0.428059933 | -0.51930445  | 3.549308963 | 1.701729953 | 0.974494024 | NA |
| ASV_16s_10959 | 0.34202613  | 0.182367827  | 3.549554179 | 1.320961477 | 0.98787013  | NA |
| ASV_16s_10960 | 0.343937879 | -0.008226948 | 3.550500714 | 1.266715713 | 0.9893088   | NA |
| ASV_16s_10961 | 0.403108033 | 0.414808216  | 3.550800235 | 1.347214587 | NA          | NA |
| ASV_16s_10962 | 0.339591483 | -0.271449397 | 3.550216037 | 0.933363122 | 0.99583307  | NA |
| ASV_16s_10963 | 0.350203717 | -0.160920229 | 3.550659966 | 1.302101328 | 0.988383013 | NA |
| ASV_16s_10964 | 0.381812168 | -0.161742042 | 3.551703488 | 0.468081993 | NA          | NA |
| ASV_16s_10965 | 0.413284579 | 1.485303694  | 2.588685906 | 1.250907207 | 0.989707151 | NA |
| ASV_16s_10966 | 0.321729308 | 0.28051743   | 3.550143368 | 1.137197093 | 0.992301779 | NA |
| ASV_16s_10967 | 0.281103837 | -0.111206968 | 3.550085677 | 0.694823428 | 0.998375196 | NA |
| ASV_16s_10968 | 0.384911184 | 1.721781239  | 3.549971185 | 0.966741387 | 0.99534735  | NA |
| ASV_16s_10969 | 0.328452062 | 1.318981916  | 3.550472698 | 0.810263435 | NA          | NA |
| ASV_16s_10970 | 0.301027706 | 0.397714913  | 3.550923182 | 0.808577172 | NA          | NA |
| ASV_16s_10971 | 0.426158334 | 0.396966001  | 3.551439661 | 0.612776203 | NA          | NA |
| ASV_16s_10972 | 0.335378203 | -0.564524964 | 3.549888114 | 0.838774663 | NA          | NA |
| ASV_16s_10973 | 0.331897364 | -0.19817952  | 3.549357274 | 1.027251422 | NA          | NA |
| ASV_16s_10974 | 0.304041722 | -0.760774696 | 3.549503964 | 0.932725835 | NA          | NA |
| ASV_16s_10975 | 0.273266303 | -0.286042532 | 3.549398481 | 0.908850933 | NA          | NA |
| ASV_16s_10976 | 0.273982012 | 1.307259762  | 3.550511571 | 0.687203172 | NA          | NA |
| ASV_16s_10977 | 0.225836992 | 0.856223472  | 3.55041981  | 0.824444078 | NA          | NA |
| ASV_16s_10978 | 0.265614229 | 0.416511911  | 3.550786766 | 0.699882524 | NA          | NA |

|               |             |              |             |             |             |    |
|---------------|-------------|--------------|-------------|-------------|-------------|----|
| ASV_16s_10979 | 0.10006507  | 0.347003787  | 3.551693314 | 0.388192845 | NA          | NA |
| ASV_16s_10980 | 0.368017897 | 0.373710651  | 3.549550568 | 1.581544503 | 0.979351579 | NA |
| ASV_16s_10981 | 0.161464978 | -0.520979285 | 3.550662178 | 0.53609936  | NA          | NA |
| ASV_16s_10982 | 0.161464978 | -0.520979285 | 3.550662178 | 0.53609936  | NA          | NA |
| ASV_16s_10983 | 0.404276822 | -0.149944428 | 3.549444241 | 1.411294316 | NA          | NA |
| ASV_16s_10984 | 0.179717318 | -0.532897193 | 3.550494777 | 0.56983596  | NA          | NA |
| ASV_16s_10985 | 0.142468557 | 1.139996793  | 3.551058179 | 0.464495385 | NA          | NA |
| ASV_16s_10986 | 0.300857776 | -0.079020946 | 3.550696253 | 1.142040283 | 0.992200764 | NA |
| ASV_16s_10987 | 0.194035082 | 0.220045081  | 3.55072581  | 0.76230585  | 0.997809877 | NA |
| ASV_16s_10988 | 0.19851049  | 0.220042581  | 3.550722449 | 0.77354138  | 0.997704689 | NA |
| ASV_16s_10989 | 0.322138751 | -0.954214318 | 3.55031066  | 0.767813175 | 0.997758724 | NA |
| ASV_16s_10990 | 0.319990926 | 0.358233121  | 3.551818093 | 0.548546443 | 0.999248595 | NA |
| ASV_16s_10991 | 0.284284095 | -0.069154915 | 3.550331866 | 1.470887937 | NA          | NA |
| ASV_16s_10992 | 0.297156571 | -0.069108809 | 3.55021445  | 1.536784547 | 0.981008786 | NA |
| ASV_16s_10993 | 0.28874376  | -0.068918989 | 3.55010616  | 1.54211473  | NA          | NA |
| ASV_16s_10994 | 0.372607919 | 1.901308139  | 3.549986068 | 0.541345623 | NA          | NA |
| ASV_16s_10995 | 0.362975751 | 0.663264447  | 3.551145712 | 1.360887128 | 0.986739248 | NA |
| ASV_16s_10996 | 0.303532238 | -0.068689142 | 3.550019405 | 1.582001765 | 0.979334226 | NA |
| ASV_16s_10997 | 0.360723708 | 0.717443227  | 3.549917694 | 1.608541905 | 0.978312341 | NA |
| ASV_16s_10998 | 0.239383899 | 0.297073783  | 3.551668526 | 0.47344277  | NA          | NA |
| ASV_16s_10999 | 0.241947699 | 0.279773473  | 3.551457414 | 0.758560801 | NA          | NA |
| ASV_16s_11000 | 0.137361452 | 0.281396576  | 3.55166166  | 0.555791939 | NA          | NA |
| ASV_16s_11001 | 0.137361452 | 0.281396576  | 3.55166166  | 0.555791939 | NA          | NA |
| ASV_16s_11002 | 0.192613568 | 0.279452635  | 3.551559712 | 0.675543262 | NA          | NA |
| ASV_16s_11003 | 0.233771596 | -0.56810146  | 3.551002163 | 0.730483888 | NA          | NA |
| ASV_16s_11004 | 0.364430753 | -0.54896012  | 3.549598286 | 0.794881435 | NA          | NA |
| ASV_16s_11005 | 0.374012356 | 1.10021157   | 3.550186354 | 1.359200222 | 0.986788278 | NA |
| ASV_16s_11006 | 0.397596239 | 0.744884083  | 3.550662297 | 1.294072523 | 0.98859723  | NA |
| ASV_16s_11007 | 0.496011864 | 0.869498372  | 3.550030727 | 1.817216355 | 0.969261017 | NA |
| ASV_16s_11008 | 0.394372122 | 0.343680075  | 3.549871494 | 1.758809964 | 0.971977114 | NA |
| ASV_16s_11009 | 0.394585166 | 0.409228311  | 3.550523479 | 1.404407632 | 0.98543588  | NA |
| ASV_16s_11010 | 0.403714768 | 0.343754797  | 3.549912687 | 1.679983106 | NA          | NA |
| ASV_16s_11011 | 0.332117789 | 0.342697191  | 3.549930546 | 1.625138258 | NA          | NA |
| ASV_16s_11012 | 0.350306006 | 0.343307191  | 3.549942719 | 1.627771495 | NA          | NA |
| ASV_16s_11013 | 0.37909658  | 0.771039931  | 3.54949371  | 1.414559204 | 0.985121151 | NA |
| ASV_16s_11014 | 0.399637571 | 0.317876612  | 3.550250076 | 1.786728828 | 0.970696567 | NA |
| ASV_16s_11015 | 0.375869765 | 0.34294678   | 3.549849459 | 1.722621817 | NA          | NA |
| ASV_16s_11016 | 0.406772305 | 0.36754143   | 3.550310367 | 1.492517111 | NA          | NA |
| ASV_16s_11017 | 0.308068974 | 0.360374004  | 3.550923721 | 1.197356227 | NA          | NA |
| ASV_16s_11018 | 0.344872273 | 0.31593937   | 3.550795511 | 1.215555359 | 0.990564318 | NA |
| ASV_16s_11019 | 0.345564044 | 0.315939369  | 3.550795095 | 1.216573878 | 0.990540268 | NA |
| ASV_16s_11020 | 0.378694982 | 0.553035555  | 3.550749544 | 2.024052789 | 0.958497104 | NA |
| ASV_16s_11021 | 0.332009964 | 0.315939503  | 3.550803554 | 1.196295559 | 0.991011942 | NA |
| ASV_16s_11022 | 0.357570068 | 0.315939387  | 3.550788142 | 1.233854098 | 0.990126411 | NA |
| ASV_16s_11023 | 0.329636734 | 0.315939504  | 3.550805105 | 1.192667765 | 0.991094742 | NA |
| ASV_16s_11024 | 0.415909938 | 0.315939229  | 3.550760038 | 1.310468785 | 0.988157147 | NA |
| ASV_16s_11025 | 0.397809569 | 1.032081923  | 3.550055402 | 0.752640225 | NA          | NA |
| ASV_16s_11026 | 0.459357472 | 1.152205381  | 3.550282324 | 1.013222547 | NA          | NA |
| ASV_16s_11027 | 0.42565719  | 0.734736344  | 3.550828628 | 1.297691674 | NA          | NA |
| ASV_16s_11028 | 0.395729582 | 1.153220166  | 3.550343381 | 0.947096691 | 0.9956374   | NA |
| ASV_16s_11029 | 0.2108517   | 0.733853624  | 3.551084532 | 0.944097017 | NA          | NA |
| ASV_16s_11030 | 0.367445586 | 0.693488269  | 3.550754216 | 1.182382527 | 0.991326895 | NA |
| ASV_16s_11031 | 0.386731871 | 0.693520046  | 3.550744173 | 1.208322901 | 0.990734001 | NA |
| ASV_16s_11032 | 0.401832866 | 0.693547548  | 3.550736981 | 1.227756235 | 0.990273712 | NA |
| ASV_16s_11033 | 0.352219136 | 0.693458373  | 3.550762919 | 1.160932391 | 0.991798779 | NA |
| ASV_16s_11034 | 0.277517275 | -0.097624863 | 3.550237337 | 1.42629816  | NA          | NA |
| ASV_16s_11035 | 0.276515824 | -0.117676322 | 3.550222464 | 1.436279131 | NA          | NA |
| ASV_16s_11036 | 0.28136113  | -0.187619859 | 3.55014725  | 1.476031302 | 0.983127873 | NA |
| ASV_16s_11037 | 0.281878967 | -0.208715604 | 3.550134026 | 1.478461483 | 0.983045968 | NA |
| ASV_16s_11038 | 0.279352524 | -0.215878206 | 3.550142364 | 1.469978682 | 0.983330834 | NA |
| ASV_16s_11039 | 0.273534288 | -0.219139455 | 3.550168259 | 1.451039232 | 0.983956443 | NA |
| ASV_16s_11040 | 0.280641414 | -0.258740619 | 3.550122512 | 1.464152426 | 0.983524817 | NA |
| ASV_16s_11041 | 0.283691399 | -0.282941049 | 3.550103494 | 1.462711274 | NA          | NA |
| ASV_16s_11042 | 0.284209237 | -0.304827348 | 3.550097516 | 1.451123682 | NA          | NA |
| ASV_16s_11043 | 0.2779245   | -0.390724678 | 3.550131713 | 1.334057462 | 0.987505974 | NA |
| ASV_16s_11044 | 0.279708411 | -0.416943514 | 3.550131393 | 1.297825756 | 0.988497395 | NA |
| ASV_16s_11045 | 0.097713845 | -0.404306636 | 3.551456761 | 0.456888864 | NA          | NA |

|               |             |              |             |             |             |    |
|---------------|-------------|--------------|-------------|-------------|-------------|----|
| ASV_16s_11046 | 0.304613763 | -0.680391997 | 3.550195672 | 0.830262908 | NA          | NA |
| ASV_16s_11047 | 0.273716818 | -0.67882746  | 3.550356747 | 0.795909762 | NA          | NA |
| ASV_16s_11048 | 0.273716818 | -0.67882746  | 3.550356747 | 0.795909762 | NA          | NA |
| ASV_16s_11049 | 0.273716818 | -0.67882746  | 3.550356747 | 0.795909762 | NA          | NA |
| ASV_16s_11050 | 0.127000226 | 0.153572916  | 3.550737258 | 1.101440504 | 0.993022099 | NA |
| ASV_16s_11051 | 0.121570866 | 0.220112667  | 3.55081455  | 0.542493866 | NA          | NA |
| ASV_16s_11053 | 0.374001134 | -0.705847244 | 3.549899526 | 0.916827715 | 0.996061014 | NA |
| ASV_16s_11054 | 0.292622574 | 0.13094967   | 3.550015881 | 1.407473811 | 0.985341248 | NA |
| ASV_16s_11055 | 0.283770403 | 0.29237825   | 3.551747834 | 0.621635479 | NA          | NA |
| ASV_16s_11056 | 0.337489396 | -0.782041015 | 3.549754178 | 1.164819569 | NA          | NA |
| ASV_16s_11057 | 0.347777403 | -1.021936264 | 3.54987919  | 0.951024923 | 0.995580362 | NA |
| ASV_16s_11058 | 0.317425217 | 1.169653692  | 3.550679997 | 0.994944629 | NA          | NA |
| ASV_16s_11059 | 0.348465744 | -0.764830034 | 3.54967828  | 1.319316193 | 0.987915414 | NA |
| ASV_16s_11060 | 0.306380826 | -0.382794298 | 3.550114031 | 1.213119613 | NA          | NA |
| ASV_16s_11061 | 0.374144696 | -0.755671036 | 3.549641454 | 1.434932228 | 0.984477218 | NA |
| ASV_16s_11062 | 0.336760354 | -0.716681364 | 3.549813075 | 1.363635492 | NA          | NA |
| ASV_16s_11063 | 0.353134173 | -0.681705138 | 3.549867366 | 1.433249068 | 0.984531042 | NA |
| ASV_16s_11064 | 0.358148773 | -0.689450672 | 3.549838159 | 1.443239936 | 0.984209903 | NA |
| ASV_16s_11065 | 0.335500398 | -0.628888743 | 3.550000198 | 1.399436808 | 0.985588508 | NA |
| ASV_16s_11066 | 0.310208416 | 0.887758227  | 3.549566599 | 0.918168301 | 0.996042842 | NA |
| ASV_16s_11067 | 0.348053995 | -0.772380849 | 3.549639577 | 1.11799845  | 0.992694086 | NA |
| ASV_16s_11068 | 0.34673207  | -0.61205996  | 3.550022595 | 1.421254776 | 0.984911338 | NA |
| ASV_16s_11069 | 0.362247963 | -0.651541309 | 3.549917805 | 1.454462367 | 0.983844433 | NA |
| ASV_16s_11070 | 0.301789113 | -0.090664879 | 3.550257797 | 1.241308314 | NA          | NA |
| ASV_16s_11071 | 0.332741141 | -0.399680269 | 3.550298431 | 1.351288396 | NA          | NA |
| ASV_16s_11072 | 0.284214195 | -0.681442939 | 3.550400901 | 0.737128366 | NA          | NA |
| ASV_16s_11073 | 0.63030354  | -0.409342731 | 3.550510901 | 1.294728163 | 0.988579829 | NA |
| ASV_16s_11074 | 0.322231883 | -0.061949784 | 3.550597901 | 1.064346924 | NA          | NA |
| ASV_16s_11075 | 0.207346632 | 0.215506907  | 3.550754504 | 0.5867179   | NA          | NA |
| ASV_16s_11076 | 0.366020542 | 0.020938185  | 3.550869158 | 0.849326487 | 0.99690737  | NA |
| ASV_16s_11077 | 0.291433908 | -0.04803226  | 3.550542913 | 0.68653904  | NA          | NA |
| ASV_16s_11078 | 0.381366563 | 0.315557027  | 3.549639166 | 1.110055192 | 0.99285263  | NA |
| ASV_16s_11079 | 0.340978561 | 1.322936518  | 3.55042714  | 0.822713297 | NA          | NA |
| ASV_16s_11080 | 0.320244263 | 1.755761211  | 3.550427054 | 0.415775642 | 0.999700198 | NA |
| ASV_16s_11081 | 0.334109893 | -0.338906942 | 3.550545878 | 0.826005369 | 0.997169414 | NA |
| ASV_16s_11082 | 0.250494373 | 0.387180919  | 3.551209012 | 0.747445422 | NA          | NA |
| ASV_16s_11083 | 0.38259015  | 0.359191071  | 3.551748312 | 0.499619281 | NA          | NA |
| ASV_16s_11084 | 0.262744893 | -0.117091896 | 3.550915225 | 0.375972826 | 0.999785936 | NA |
| ASV_16s_11085 | 0.400083548 | -0.565300666 | 3.549694316 | 0.895412797 | NA          | NA |
| ASV_16s_11086 | 0.325847696 | -0.006402434 | 3.54996089  | 1.162210482 | NA          | NA |
| ASV_16s_11087 | 0.261708137 | 0.415769398  | 3.55080753  | 0.694968995 | NA          | NA |
| ASV_16s_11088 | 0.098593524 | 0.346757797  | 3.551697646 | 0.383994232 | NA          | NA |
| ASV_16s_11089 | 0.177074416 | -0.531718807 | 3.550518959 | 0.565150116 | NA          | NA |
| ASV_16s_11090 | 0.140373432 | 1.135104891  | 3.551068485 | 0.459657212 | NA          | NA |
| ASV_16s_11091 | 0.140373432 | 1.135104891  | 3.551068485 | 0.459657212 | NA          | NA |
| ASV_16s_11092 | 0.191420679 | 0.220046658  | 3.550727849 | 0.755619407 | 0.997870937 | NA |
| ASV_16s_11093 | 0.201257905 | 0.220041187  | 3.550720462 | 0.780313744 | NA          | NA |
| ASV_16s_11094 | 0.201257905 | 0.220041187  | 3.550720462 | 0.780313744 | NA          | NA |
| ASV_16s_11095 | 0.233101635 | 0.209836549  | 3.55050315  | 0.565043086 | NA          | NA |
| ASV_16s_11096 | 0.347127931 | 0.31093308   | 3.550776637 | 1.196010187 | 0.991018472 | NA |
| ASV_16s_11097 | 0.21200932  | 0.596128028  | 3.550679549 | 0.738148086 | NA          | NA |
| ASV_16s_11098 | 0.307272997 | 1.342753365  | 3.550573063 | 0.771174246 | NA          | NA |
| ASV_16s_11099 | 0.228655877 | -0.605241916 | 3.550444856 | 0.505196943 | NA          | NA |
| ASV_16s_11100 | 0.332726586 | 0.342564708  | 3.550737459 | 0.899185607 | 0.996295131 | NA |
| ASV_16s_11101 | 0.322605329 | 0.759778991  | 3.551514224 | 0.852643712 | NA          | NA |
| ASV_16s_11102 | 0.287681962 | -0.068697204 | 3.550068139 | 1.537950186 | NA          | NA |
| ASV_16s_11103 | 0.304199254 | -0.068783675 | 3.550015656 | 1.590051256 | NA          | NA |
| ASV_16s_11104 | 0.308812084 | 0.7832412    | 3.55121289  | 0.893012121 | NA          | NA |
| ASV_16s_11105 | 0.290159554 | -0.068460182 | 3.550077111 | 1.527401262 | NA          | NA |
| ASV_16s_11106 | 0.379042777 | 0.336488043  | 3.551780232 | 0.379930076 | 0.999778285 | NA |
| ASV_16s_11107 | 0.358733899 | 0.320004802  | 3.550874253 | 0.957986104 | 0.995478107 | NA |
| ASV_16s_11108 | 0.36894401  | 0.77440355   | 3.550590324 | 1.247921214 | NA          | NA |
| ASV_16s_11109 | 0.448318006 | -0.607147561 | 3.550109577 | 0.943744655 | NA          | NA |
| ASV_16s_11110 | 0.517306575 | -0.201480515 | 3.548630616 | 1.601607833 | NA          | NA |
| ASV_16s_11111 | 0.435169921 | -0.039610163 | 3.550241166 | 1.544603946 | 0.980725173 | NA |
| ASV_16s_11112 | 0.392449448 | 1.160240678  | 3.55002084  | 1.122979681 | 0.992593541 | NA |
| ASV_16s_11113 | 0.226874515 | -0.078823319 | 3.550755389 | 1.000137973 | NA          | NA |

|               |             |              |             |              |             |    |
|---------------|-------------|--------------|-------------|--------------|-------------|----|
| ASV_16s_11114 | 0.279944196 | -0.103534928 | 3.550155695 | 1.248980772  | NA          | NA |
| ASV_16s_11115 | 0.421894457 | 0.201033889  | 3.55006302  | 1.842937424  | NA          | NA |
| ASV_16s_11116 | 0.440615087 | 0.550487927  | 3.550662538 | 1.344682796  | 0.987205661 | NA |
| ASV_16s_11117 | 0.416476397 | 0.269940947  | 3.550092825 | 1.728954214  | NA          | NA |
| ASV_16s_11118 | 0.33849058  | 0.235173929  | 3.549978201 | 1.64828135   | NA          | NA |
| ASV_16s_11119 | 0.299329122 | -0.029171226 | 3.550790775 | 1.198650923  | NA          | NA |
| ASV_16s_11120 | 0.402074561 | 0.34690934   | 3.550032093 | 1.601389098  | NA          | NA |
| ASV_16s_11121 | 0.24878662  | -0.062330206 | 3.550731659 | 1.111601139  | NA          | NA |
| ASV_16s_11122 | 0.267725949 | 0.232886977  | 3.550596115 | 1.219634136  | NA          | NA |
| ASV_16s_11123 | 0.325858124 | 0.342648038  | 3.549945174 | 1.609606565  | NA          | NA |
| ASV_16s_11124 | 0.322500889 | 0.343051482  | 3.550817791 | 0.927601932  | NA          | NA |
| ASV_16s_11125 | 0.404901079 | 0.62954394   | 3.549639216 | 1.35805475   | 0.986821509 | NA |
| ASV_16s_11126 | 0.303538548 | 0.360372511  | 3.550928631 | 1.18982846   | NA          | NA |
| ASV_16s_11127 | 0.346270138 | 0.315939391  | 3.550794689 | 1.217504625  | 0.990518257 | NA |
| ASV_16s_11128 | 0.385712026 | 0.802705048  | 3.550730282 | 1.096931331  | 0.993109781 | NA |
| ASV_16s_11129 | 0.419397525 | 0.734723408  | 3.550832398 | 1.290151083  | NA          | NA |
| ASV_16s_11130 | 0.419397525 | 0.734723408  | 3.550832398 | 1.290151083  | NA          | NA |
| ASV_16s_11131 | 0.20775094  | 0.733827776  | 3.551092076 | 0.936799155  | NA          | NA |
| ASV_16s_11132 | 0.396343654 | 0.693538919  | 3.550739535 | 1.220757662  | 0.990441077 | NA |
| ASV_16s_11133 | 0.377621004 | 0.693504709  | 3.550748794 | 1.196208421  | 0.991013936 | NA |
| ASV_16s_11134 | 0.361996042 | 0.693475509  | 3.550757251 | 1.174782317  | 0.991495985 | NA |
| ASV_16s_11135 | 0.269255024 | 0.272356845  | 3.551105205 | 0.770868285  | NA          | NA |
| ASV_16s_11136 | 0.292500577 | -0.036966672 | 3.550237402 | 1.370141103  | NA          | NA |
| ASV_16s_11137 | 0.274174482 | -0.057547043 | 3.550300458 | 1.366762049  | NA          | NA |
| ASV_16s_11138 | 0.274433401 | -0.069588393 | 3.550284241 | 1.382846297  | NA          | NA |
| ASV_16s_11139 | 0.274951238 | -0.093085072 | 3.550254918 | 1.411991975  | NA          | NA |
| ASV_16s_11140 | 0.27676367  | -0.171023386 | 3.550178884 | 1.458488346  | 0.983712096 | NA |
| ASV_16s_11141 | 0.277281508 | -0.192543789 | 3.550163429 | 1.463407542  | 0.983549519 | NA |
| ASV_16s_11142 | 0.274755064 | -0.199653066 | 3.550171569 | 1.45566682   | 0.98380491  | NA |
| ASV_16s_11143 | 0.284257508 | -0.221766541 | 3.550117885 | 1.484511324  | 0.982841037 | NA |
| ASV_16s_11144 | 0.275785036 | -0.232367436 | 3.550152549 | 1.456210984  | 0.983787034 | NA |
| ASV_16s_11145 | 0.275278606 | -0.231766282 | 3.550155144 | 1.454706186  | 0.983836437 | NA |
| ASV_16s_11146 | 0.27909394  | -0.26751626  | 3.550127778 | 1.455687078  | NA          | NA |
| ASV_16s_11147 | 0.273787838 | -0.283485757 | 3.550148758 | 1.431278066  | 0.984593928 | NA |
| ASV_16s_11148 | 0.275307126 | -0.285076848 | 3.550141258 | 1.435255656  | 0.984466863 | NA |
| ASV_16s_11149 | 0.274553186 | -0.295306787 | 3.550142923 | 1.427088572  | 0.984727083 | NA |
| ASV_16s_11150 | 0.280129615 | -0.311812215 | 3.550115072 | 1.433722599  | NA          | NA |
| ASV_16s_11151 | 0.269494595 | -0.301357746 | 3.550166341 | 1.407361105  | NA          | NA |
| ASV_16s_11152 | 0.29421237  | -0.426561807 | 3.550070347 | 1.324618772  | 0.987769096 | NA |
| ASV_16s_11153 | 0.35019384  | -0.681226977 | 3.550007202 | 0.875034195  | 0.996600689 | NA |
| ASV_16s_11154 | 0.33273713  | -0.680924593 | 3.550073433 | 0.858573932  | 0.996799228 | NA |
| ASV_16s_11155 | 0.269631492 | -0.678272742 | 3.550380131 | 0.791010961  | NA          | NA |
| ASV_16s_11156 | 0.076199534 | -0.169156267 | 3.550854944 | 0.378482043  | NA          | NA |
| ASV_16s_11157 | 0.079032207 | -0.072813725 | 3.55083253  | 0.560537321  | NA          | NA |
| ASV_16s_11158 | 0.051759846 | -0.166969065 | 3.551012284 | 0.248886398  | NA          | NA |
| ASV_16s_11159 | 0.090580799 | 0.220174172  | 3.550895602 | 0.419743043  | NA          | NA |
| ASV_16s_11161 | 0.307484645 | -0.058621043 | 3.549979095 | 1.436693745  | 0.984420768 | NA |
| ASV_16s_11162 | 0.015821591 | 0.526744295  | 3.551888789 | -0.023542502 | 1           | NA |
| ASV_16s_11163 | 0.264638979 | 0.182362404  | 3.550139763 | 1.329040787  | 0.987646251 | NA |
| ASV_16s_11164 | 0.273631771 | -0.369123491 | 3.549997475 | 0.86413655   | NA          | NA |
| ASV_16s_11165 | 0.296159006 | 0.210359762  | 3.549780269 | 1.517940287  | 0.98168206  | NA |
| ASV_16s_11166 | 0.278074865 | 0.043435726  | 3.549864703 | 1.40911506   | 0.985290442 | NA |
| ASV_16s_11167 | 0.359833616 | -0.781823939 | 3.549750122 | 1.055550901  | 0.993881965 | NA |
| ASV_16s_11168 | 0.284620772 | 0.089732665  | 3.549620257 | 1.509297854  | 0.981986022 | NA |
| ASV_16s_11169 | 0.30031912  | 0.535601886  | 3.549808416 | 1.403976498  | 0.985449157 | NA |
| ASV_16s_11170 | 0.309776274 | 0.630312271  | 3.549374754 | 1.396808074  | 0.985668829 | NA |
| ASV_16s_11171 | 0.359042397 | -0.782011625 | 3.549611408 | 1.27032532   | 0.989216528 | NA |
| ASV_16s_11172 | 0.33330041  | -0.085320454 | 3.549102652 | 1.507180357  | 0.982060035 | NA |
| ASV_16s_11173 | 0.331296911 | -0.766717859 | 3.549752896 | 1.232319546  | NA          | NA |
| ASV_16s_11174 | 0.352874772 | -0.773448969 | 3.549644849 | 1.293844011  | 0.988603291 | NA |
| ASV_16s_11175 | 0.350415989 | -0.769856638 | 3.549660055 | 1.306988955  | NA          | NA |
| ASV_16s_11176 | 0.331014631 | -0.705540033 | 3.549953534 | 1.322496149  | NA          | NA |
| ASV_16s_11177 | 0.292501955 | 0.228447466  | 3.54939664  | 0.906082387  | NA          | NA |
| ASV_16s_11178 | 0.351467321 | 0.744820906  | 3.550644246 | 1.352051302  | NA          | NA |
| ASV_16s_11179 | 0.350616629 | -0.753610889 | 3.549705356 | 1.361520589  | 0.986720808 | NA |
| ASV_16s_11180 | 0.347524722 | -0.732880283 | 3.549757002 | 1.381515346  | 0.986130715 | NA |
| ASV_16s_11181 | 0.318752544 | 1.183128082  | 3.550549664 | 1.020560298  | NA          | NA |

|               |             |              |             |             |             |    |
|---------------|-------------|--------------|-------------|-------------|-------------|----|
| ASV_16s_11182 | 0.328571307 | -0.708170374 | 3.549848795 | 1.345137391 | NA          | NA |
| ASV_16s_11183 | 0.353352404 | 0.192712378  | 3.549863501 | 1.547408191 | 0.980622855 | NA |
| ASV_16s_11184 | 0.301080996 | -0.241954903 | 3.550458378 | 1.129999814 | 0.992450365 | NA |
| ASV_16s_11185 | 0.354737078 | 0.383257329  | 3.549160361 | 1.571101792 | 0.979745538 | NA |
| ASV_16s_11186 | 0.356935335 | -0.703653314 | 3.549802589 | 1.432779615 | 0.984546034 | NA |
| ASV_16s_11187 | 0.310306651 | -0.280608631 | 3.550373808 | 1.152907899 | NA          | NA |
| ASV_16s_11188 | 0.369576408 | -0.716612528 | 3.549750753 | 1.457526097 | 0.983743785 | NA |
| ASV_16s_11189 | 0.332140356 | -0.772943354 | 3.549898483 | 1.317766535 | 0.987957971 | NA |
| ASV_16s_11190 | 0.332382454 | -0.930864815 | 3.550048278 | 0.836158708 | NA          | NA |
| ASV_16s_11191 | 0.348853832 | -0.688354386 | 3.549855629 | 1.414871711 | 0.985111398 | NA |
| ASV_16s_11192 | 0.352446573 | -0.636929319 | 3.549960797 | 1.435597139 | 0.984455924 | NA |
| ASV_16s_11193 | 0.322375245 | 0.183250528  | 3.549531713 | 1.380184332 | NA          | NA |
| ASV_16s_11194 | 0.360308764 | -0.624020864 | 3.549981253 | 1.448266784 | 0.98404682  | NA |
| ASV_16s_11195 | 0.350435324 | 0.794260018  | 3.5497086   | 1.127879608 | 0.992493789 | NA |
| ASV_16s_11196 | 0.346086984 | 0.340861614  | 3.551391338 | 0.753927713 | NA          | NA |
| ASV_16s_11197 | 0.348560634 | -0.536599007 | 3.550193418 | 1.403892426 | 0.985451745 | NA |
| ASV_16s_11198 | 0.221290821 | 0.723503316  | 3.551234874 | 1.049302265 | NA          | NA |
| ASV_16s_11199 | 0.338572696 | -0.147622936 | 3.54941459  | 1.336258375 | NA          | NA |
| ASV_16s_11200 | 0.264045909 | -0.48409091  | 3.550479245 | 0.475809201 | 0.999530326 | NA |
| ASV_16s_11201 | 0.273394673 | -0.321802327 | 3.550270788 | 1.117938662 | NA          | NA |
| ASV_16s_11202 | 0.294115806 | -0.696441325 | 3.550931733 | 0.609973717 | NA          | NA |
| ASV_16s_11203 | 0.311628109 | 0.25183438   | 3.549138905 | 1.072992931 | NA          | NA |
| ASV_16s_11204 | 0.305127869 | -0.077898366 | 3.550685579 | 1.2252011   | 0.990335025 | NA |
| ASV_16s_11205 | 0.323432081 | -0.078007668 | 3.550524079 | 1.291816313 | 0.988656987 | NA |
| ASV_16s_11206 | 0.330614017 | 0.02750941   | 3.549445576 | 0.857588744 | 0.996810865 | NA |
| ASV_16s_11207 | 0.244061243 | 0.684464318  | 3.551212716 | 0.54053783  | NA          | NA |
| ASV_16s_11208 | 0.303925909 | 0.126647822  | 3.550020331 | 1.246963715 | 0.989805066 | NA |
| ASV_16s_11209 | 0.30817803  | 1.311692562  | 3.550551664 | 0.788961821 | NA          | NA |
| ASV_16s_11210 | 0.254865915 | 0.895110451  | 3.550987099 | 0.751771164 | NA          | NA |
| ASV_16s_11211 | 0.362507149 | -0.267899428 | 3.549743825 | 1.235514893 | NA          | NA |
| ASV_16s_11212 | 0.226417359 | 0.381900734  | 3.551350906 | 0.713440705 | NA          | NA |
| ASV_16s_11213 | 0.317608974 | -1.306764026 | 3.549773568 | 0.478545492 | NA          | NA |
| ASV_16s_11214 | 0.226125556 | -0.560465802 | 3.550458928 | 0.712948516 | NA          | NA |
| ASV_16s_11215 | 0.226125556 | -0.560465802 | 3.550458928 | 0.712948516 | NA          | NA |
| ASV_16s_11216 | 0.308425149 | -1.043602025 | 3.549882518 | 0.527317131 | NA          | NA |
| ASV_16s_11217 | 0.216847167 | 1.258387063  | 3.550719718 | 0.606573076 | NA          | NA |
| ASV_16s_11218 | 0.257802045 | 0.41480732   | 3.550826904 | 0.689941181 | NA          | NA |
| ASV_16s_11219 | 0.257802045 | 0.41480732   | 3.550826904 | 0.689941181 | NA          | NA |
| ASV_16s_11220 | 0.278932674 | 0.418216674  | 3.55071359  | 0.715866907 | NA          | NA |
| ASV_16s_11221 | 0.097121979 | 0.346514224  | 3.551701968 | 0.379762932 | NA          | NA |
| ASV_16s_11222 | 0.097121979 | 0.346514224  | 3.551701968 | 0.379762932 | NA          | NA |
| ASV_16s_11223 | 0.097121979 | 0.346514224  | 3.551701968 | 0.379762932 | NA          | NA |
| ASV_16s_11224 | 0.156716008 | -0.515593918 | 3.550703648 | 0.526586945 | NA          | NA |
| ASV_16s_11225 | 0.156716008 | -0.515593918 | 3.550703648 | 0.526586945 | NA          | NA |
| ASV_16s_11226 | 0.174431515 | -0.530521907 | 3.55054382  | 0.56041202  | NA          | NA |
| ASV_16s_11227 | 0.302545241 | -0.079025472 | 3.550695247 | 1.144825798 | 0.992142291 | NA |
| ASV_16s_11228 | 0.266303913 | -0.078944026 | 3.550719802 | 1.080462009 | NA          | NA |
| ASV_16s_11229 | 0.192909779 | 0.220045836  | 3.550726686 | 0.759404913 | 0.997836508 | NA |
| ASV_16s_11230 | 0.208845002 | 0.596123062  | 3.550681512 | 0.730742142 | NA          | NA |
| ASV_16s_11231 | 0.233471571 | 0.610065667  | 3.550452443 | 1.040574419 | 0.994147193 | NA |
| ASV_16s_11232 | 0.356510201 | 0.414947333  | 3.549741991 | 1.735956028 | 0.973001141 | NA |
| ASV_16s_11233 | 0.278196353 | -0.068989456 | 3.550218878 | 1.494371035 | NA          | NA |
| ASV_16s_11234 | 0.280673944 | -0.068852718 | 3.550124802 | 1.517240487 | NA          | NA |
| ASV_16s_11235 | 0.274647263 | -0.014203588 | 3.550558832 | 1.212498723 | NA          | NA |
| ASV_16s_11236 | 0.268403388 | 0.049943771  | 3.550067975 | 1.830572368 | 0.968619894 | NA |
| ASV_16s_11237 | 0.379346103 | 1.939184005  | 3.549894751 | 0.461032782 | NA          | NA |
| ASV_16s_11238 | 0.290088792 | -0.067638868 | 3.550244499 | 1.442409526 | NA          | NA |
| ASV_16s_11239 | 0.30141241  | 0.460233637  | 3.55125844  | 1.145703022 | NA          | NA |
| ASV_16s_11240 | 0.356578167 | 0.321227534  | 3.550894823 | 1.002360676 | 0.994790366 | NA |
| ASV_16s_11241 | 0.161884837 | 0.279750254  | 3.551622127 | 0.613266097 | NA          | NA |
| ASV_16s_11242 | 0.080552815 | 0.286533206  | 3.551807929 | 0.3912345   | NA          | NA |
| ASV_16s_11243 | 0.22689596  | -0.560978332 | 3.551024574 | 0.7201946   | NA          | NA |
| ASV_16s_11244 | 0.346563187 | 0.338243245  | 3.550932825 | 0.741321182 | NA          | NA |
| ASV_16s_11245 | 0.29294152  | -0.116345183 | 3.550121521 | 1.432780415 | 0.984546009 | NA |
| ASV_16s_11246 | 0.4121702   | 0.184104321  | 3.549961751 | 1.840930296 | NA          | NA |
| ASV_16s_11247 | 0.444330059 | -0.129839728 | 3.548987975 | 1.580386483 | 0.979395486 | NA |
| ASV_16s_11248 | 0.416854773 | 0.343579013  | 3.549865621 | 1.722086341 | 0.97361199  | NA |

|               |             |              |             |             |             |    |
|---------------|-------------|--------------|-------------|-------------|-------------|----|
| ASV_16s_11249 | 0.241648959 | -0.073816203 | 3.550762932 | 1.055863276 | NA          | NA |
| ASV_16s_11250 | 0.32739341  | 0.342847072  | 3.549952103 | 1.601032435 | NA          | NA |
| ASV_16s_11251 | 0.3476165   | 0.342713203  | 3.549895444 | 1.660406299 | 0.976231602 | NA |
| ASV_16s_11252 | 0.396916635 | 0.789564345  | 3.549315808 | 1.277870827 | NA          | NA |
| ASV_16s_11253 | 0.335800546 | 0.360842075  | 3.550646396 | 0.90533284  | 0.99621461  | NA |
| ASV_16s_11254 | 0.299008122 | 0.360370971  | 3.55093369  | 1.182188096 | NA          | NA |
| ASV_16s_11255 | 0.299008122 | 0.360370971  | 3.55093369  | 1.182188096 | NA          | NA |
| ASV_16s_11256 | 0.387423203 | 0.315939489  | 3.550772703 | 1.274531668 | NA          | NA |
| ASV_16s_11257 | 0.364339304 | 0.315939405  | 3.550784421 | 1.243360365 | 0.989894028 | NA |
| ASV_16s_11258 | 0.345548064 | 0.315939412  | 3.550795112 | 1.216502263 | 0.99054196  | NA |
| ASV_16s_11259 | 0.337911966 | 0.315939415  | 3.550799798 | 1.205158261 | 0.990807645 | NA |
| ASV_16s_11260 | 0.323468613 | 0.315939422  | 3.550809254 | 1.183044732 | 0.991312063 | NA |
| ASV_16s_11261 | 0.321199608 | 0.315939424  | 3.550810816 | 1.179482541 | 0.99139166  | NA |
| ASV_16s_11262 | 0.385286637 | 0.315939398  | 3.550773748 | 1.271585507 | 0.989184199 | NA |
| ASV_16s_11263 | 0.460170897 | 1.179937454  | 3.550036624 | 0.963053621 | NA          | NA |
| ASV_16s_11264 | 0.461396829 | 1.179794423  | 3.550077872 | 0.979840247 | 0.995147218 | NA |
| ASV_16s_11265 | 0.344006163 | 1.032681428  | 3.550626206 | 0.943110926 | NA          | NA |
| ASV_16s_11266 | 0.421823922 | 1.160518783  | 3.550293682 | 0.970352607 | NA          | NA |
| ASV_16s_11267 | 0.383145707 | 1.10976323   | 3.550443737 | 0.954340048 | 0.995531853 | NA |
| ASV_16s_11268 | 0.413327879 | 0.80276361   | 3.550712889 | 1.150825713 | 0.992015407 | NA |
| ASV_16s_11269 | 0.413137861 | 0.734710066  | 3.550836281 | 1.282497417 | NA          | NA |
| ASV_16s_11270 | 0.413137861 | 0.734710066  | 3.550836281 | 1.282497417 | NA          | NA |
| ASV_16s_11271 | 0.413137861 | 0.734710066  | 3.550836281 | 1.282497417 | NA          | NA |
| ASV_16s_11272 | 0.204650179 | 0.733801149  | 3.551099847 | 0.929405371 | NA          | NA |
| ASV_16s_11273 | 0.204650179 | 0.733801149  | 3.551099847 | 0.929405371 | NA          | NA |
| ASV_16s_11274 | 0.204650179 | 0.733801149  | 3.551099847 | 0.929405371 | NA          | NA |
| ASV_16s_11275 | 0.204650179 | 0.733801149  | 3.551099847 | 0.929405371 | NA          | NA |
| ASV_16s_11276 | 0.204650179 | 0.733801149  | 3.551099847 | 0.929405371 | NA          | NA |
| ASV_16s_11277 | 0.353631459 | 0.693461562  | 3.550762087 | 1.162914274 | 0.991755872 | NA |
| ASV_16s_11278 | 0.370340535 | 0.69349253   | 3.550752651 | 1.186304931 | 0.991238812 | NA |
| ASV_16s_11279 | 0.39498254  | 0.693536845  | 3.550740182 | 1.218989842 | NA          | NA |
| ASV_16s_11280 | 0.407532121 | 0.693555466  | 3.550734416 | 1.234819392 | 0.990102967 | NA |
| ASV_16s_11281 | 0.265175402 | 0.272744858  | 3.551134606 | 0.765881513 | NA          | NA |
| ASV_16s_11282 | 0.265175402 | 0.272744858  | 3.551134606 | 0.765881513 | NA          | NA |
| ASV_16s_11283 | 0.265175402 | 0.272744858  | 3.551134606 | 0.765881513 | NA          | NA |
| ASV_16s_11284 | 0.273832503 | -0.068384371 | 3.550288903 | 1.372379627 | NA          | NA |
| ASV_16s_11285 | 0.270117677 | -0.106822071 | 3.550265226 | 1.409285869 | NA          | NA |
| ASV_16s_11286 | 0.265352228 | -0.186973631 | 3.5502252   | 1.423942241 | 0.984826625 | NA |
| ASV_16s_11287 | 0.275273237 | -0.285030588 | 3.550141477 | 1.435110792 | NA          | NA |
| ASV_16s_11288 | 0.27172823  | -0.281291985 | 3.550159129 | 1.425776216 | 0.98476865  | NA |
| ASV_16s_11289 | 0.305239703 | -0.323668316 | 3.55000965  | 1.499216181 | 0.982336783 | NA |
| ASV_16s_11290 | 0.271486424 | -0.303359716 | 3.550156459 | 1.412354878 | 0.985189838 | NA |
| ASV_16s_11291 | 0.285950557 | -0.373079128 | 3.550091658 | 1.386127357 | 0.985992385 | NA |
| ASV_16s_11292 | 0.281518113 | -0.369585551 | 3.550110903 | 1.37691186  | 0.986267959 | NA |
| ASV_16s_11293 | 0.270007063 | -0.384556941 | 3.550168469 | 1.317571701 | 0.987963315 | NA |
| ASV_16s_11294 | 0.094797013 | -0.394225481 | 3.551483334 | 0.448045435 | NA          | NA |
| ASV_16s_11295 | 0.449850653 | -0.682484247 | 3.54972707  | 0.955568606 | NA          | NA |
| ASV_16s_11296 | 0.265546167 | -0.677377992 | 3.550403508 | 0.785975376 | NA          | NA |
| ASV_16s_11297 | 0.265546167 | -0.677377992 | 3.550403508 | 0.785975376 | NA          | NA |
| ASV_16s_11298 | 0.117941885 | 0.220118233  | 3.550821858 | 0.529162802 | NA          | NA |
| ASV_16s_11299 | 0.117941885 | 0.220118233  | 3.550821858 | 0.529162802 | NA          | NA |
| ASV_16s_11300 | 0.117941885 | 0.220118233  | 3.550821858 | 0.529162802 | NA          | NA |
| ASV_16s_11304 | 0.301687476 | -0.127313736 | 3.549991316 | 1.443155363 | 0.984212638 | NA |
| ASV_16s_11305 | 0.274161315 | -0.186938789 | 3.550398277 | 1.301052657 | 0.988411132 | NA |
| ASV_16s_11306 | 0.285271824 | 0.198367376  | 3.550126584 | 1.42297293  | NA          | NA |
| ASV_16s_11307 | 0.304257899 | -0.704362364 | 3.550169732 | 1.141160521 | NA          | NA |
| ASV_16s_11308 | 0.330471191 | -0.776780632 | 3.549780038 | 1.178835197 | 0.991406076 | NA |
| ASV_16s_11309 | 0.345723314 | -0.776915914 | 3.549679987 | 1.244007752 | 0.989878081 | NA |
| ASV_16s_11310 | 0.326467227 | -0.766697947 | 3.549780555 | 1.208134588 | NA          | NA |
| ASV_16s_11311 | 0.285143426 | -0.86914147  | 3.550076909 | 0.935660484 | 0.995800742 | NA |
| ASV_16s_11312 | 0.301385485 | 0.176000301  | 3.549625936 | 1.637700348 | 0.977156212 | NA |
| ASV_16s_11313 | 0.355652358 | -0.76672331  | 3.549647591 | 1.337691634 | 0.987403749 | NA |
| ASV_16s_11314 | 0.315422993 | 0.200101293  | 3.54949224  | 1.018333921 | NA          | NA |
| ASV_16s_11315 | 0.365373428 | -0.74989256  | 3.549676345 | 1.415793548 | NA          | NA |
| ASV_16s_11316 | 0.287569812 | -0.610278943 | 3.550221822 | 1.303150744 | NA          | NA |
| ASV_16s_11317 | 0.366024365 | -0.748140918 | 3.549679006 | 1.420592245 | NA          | NA |
| ASV_16s_11318 | 0.34406458  | -0.720852992 | 3.549788642 | 1.382531192 | 0.986100318 | NA |

|               |             |              |             |             |             |    |
|---------------|-------------|--------------|-------------|-------------|-------------|----|
| ASV_16s_11319 | 0.353477069 | -0.716936135 | 3.549777583 | 1.414060113 | NA          | NA |
| ASV_16s_11320 | 0.379105655 | 0.032844428  | 3.549896485 | 1.683313427 | NA          | NA |
| ASV_16s_11321 | 0.290320078 | -0.601561497 | 3.549856897 | 1.066876833 | 0.993676394 | NA |
| ASV_16s_11322 | 0.351503393 | -0.704472574 | 3.549809815 | 1.417001419 | 0.985044827 | NA |
| ASV_16s_11323 | 0.342303992 | -0.670879562 | 3.549072793 | 0.812612164 | NA          | NA |
| ASV_16s_11324 | 0.337847778 | -0.636737917 | 3.549824823 | 1.544433146 | 0.980731395 | NA |
| ASV_16s_11325 | 0.33384649  | -0.667618895 | 3.54992544  | 1.385678399 | 0.986005888 | NA |
| ASV_16s_11326 | 0.332277264 | -0.627782076 | 3.550007149 | 1.391272099 | 0.985837093 | NA |
| ASV_16s_11327 | 0.367288464 | -0.09149699  | 3.549369079 | 1.305287216 | 0.98829733  | NA |
| ASV_16s_11328 | 0.347602153 | -0.624504765 | 3.549994474 | 1.421759844 | 0.98489544  | NA |
| ASV_16s_11329 | 0.293346989 | -0.064135119 | 3.550336806 | 1.246410298 | NA          | NA |
| ASV_16s_11330 | 0.593424075 | 2.236577872  | 3.51784641  | 0.496156513 | 0.999460433 | NA |
| ASV_16s_11331 | 0.370896562 | 0.407813322  | 3.550354269 | 1.326929939 | 0.987704985 | NA |
| ASV_16s_11332 | 0.375784033 | -0.175908088 | 3.550205671 | 1.384710245 | 0.986034978 | NA |
| ASV_16s_11333 | 0.265678636 | 0.364215889  | 3.551290417 | 1.058175888 | NA          | NA |
| ASV_16s_11334 | 0.326064837 | 0.677982714  | 3.550828557 | 1.24072195  | 0.989958861 | NA |
| ASV_16s_11335 | 0.339238829 | -0.41448565  | 3.550505629 | 1.101576983 | 0.993019434 | NA |
| ASV_16s_11336 | 0.327224446 | -0.051182523 | 3.550728782 | 1.243732127 | NA          | NA |
| ASV_16s_11337 | 0.318156539 | 0.149505294  | 3.550810864 | 0.888311402 | 0.996434827 | NA |
| ASV_16s_11338 | 0.330800096 | 1.319722649  | 3.550464046 | 0.812579404 | NA          | NA |
| ASV_16s_11339 | 0.369864644 | 1.323120794  | 3.550159906 | 1.124150577 | NA          | NA |
| ASV_16s_11340 | 0.287747071 | 0.395466985  | 3.550992686 | 0.79357938  | NA          | NA |
| ASV_16s_11341 | 0.29029504  | 0.385490775  | 3.551353412 | 0.524476294 | NA          | NA |
| ASV_16s_11342 | 0.425695951 | 0.402914051  | 3.551140689 | 0.573541335 | 0.999130177 | NA |
| ASV_16s_11343 | 0.350762003 | -0.076815527 | 3.550729051 | 1.391784915 | NA          | NA |
| ASV_16s_11344 | 0.373101184 | -0.56501009  | 3.549767135 | 0.872938165 | NA          | NA |
| ASV_16s_11345 | 0.299480893 | -0.436665288 | 3.550465505 | 0.892378038 | NA          | NA |
| ASV_16s_11346 | 0.172322197 | 1.197373138  | 3.550908297 | 0.527680689 | NA          | NA |
| ASV_16s_11347 | 0.095650434 | 0.346267621  | 3.551706379 | 0.375494909 | NA          | NA |
| ASV_16s_11348 | 0.189775916 | -0.150266404 | 3.550219671 | 0.826775795 | NA          | NA |
| ASV_16s_11349 | 0.269238491 | -0.078949888 | 3.550717573 | 1.085948168 | 0.993320423 | NA |
| ASV_16s_11350 | 0.262269005 | -0.078933493 | 3.550722958 | 1.072756649 | NA          | NA |
| ASV_16s_11351 | 0.19403257  | 0.385920966  | 3.550705464 | 1.250738731 | 0.989711346 | NA |
| ASV_16s_11352 | 0.319958505 | 0.310934146  | 3.550792634 | 1.154650934 | 0.991933845 | NA |
| ASV_16s_11353 | 0.307806307 | 1.077294076  | 3.550767413 | 1.056198773 | NA          | NA |
| ASV_16s_11354 | 0.186198463 | 0.512368226  | 3.550669237 | 0.878687674 | 0.996555561 | NA |
| ASV_16s_11355 | 0.271188335 | -0.069230381 | 3.550429719 | 1.412026915 | NA          | NA |
| ASV_16s_11356 | 0.497572481 | 1.527417826  | 3.550019861 | 0.854496673 | NA          | NA |
| ASV_16s_11357 | 0.276143518 | -0.068850542 | 3.550148386 | 1.501416551 | NA          | NA |
| ASV_16s_11358 | 0.277134555 | -0.068796163 | 3.55012353  | 1.506760318 | NA          | NA |
| ASV_16s_11359 | 0.333290037 | 1.33552979   | 3.549964655 | 0.809979309 | NA          | NA |
| ASV_16s_11360 | 0.279839613 | -0.120317914 | 3.550676632 | 1.234481293 | NA          | NA |
| ASV_16s_11361 | 0.294808049 | -0.067489219 | 3.550275985 | 1.419592064 | NA          | NA |
| ASV_16s_11362 | 0.221917119 | 0.093225763  | 3.550549114 | 0.967977844 | NA          | NA |
| ASV_16s_11363 | 0.325955006 | 0.666593     | 3.550822684 | 1.209782707 | NA          | NA |
| ASV_16s_11364 | 0.261583687 | 0.738109894  | 3.551092777 | 1.070833109 | 0.993603565 | NA |
| ASV_16s_11365 | 0.447363309 | 1.207896625  | 3.550308279 | 0.89115435  | NA          | NA |
| ASV_16s_11366 | 0.374133069 | 1.283793438  | 3.549831121 | 1.397366724 | 0.985651783 | NA |
| ASV_16s_11367 | 0.364109173 | 0.919318923  | 3.550551214 | 1.278169879 | 0.989014309 | NA |
| ASV_16s_11368 | 0.393046252 | 0.919323949  | 3.550533621 | 1.324951346 | 0.987759883 | NA |
| ASV_16s_11369 | 0.378050291 | 1.330739812  | 3.550220602 | 1.215605212 | NA          | NA |
| ASV_16s_11370 | 0.364270576 | -0.087845053 | 3.550371566 | 1.208238645 | NA          | NA |
| ASV_16s_11371 | 0.433006258 | 0.744067617  | 3.549871206 | 1.758839406 | 0.971975781 | NA |
| ASV_16s_11372 | 0.40623495  | 0.287449425  | 3.549769037 | 1.828670974 | 0.968711621 | NA |
| ASV_16s_11373 | 0.341063755 | 0.343478804  | 3.549988596 | 1.589675658 | NA          | NA |
| ASV_16s_11374 | 0.294477696 | 0.360369383  | 3.550938903 | 1.174431715 | NA          | NA |
| ASV_16s_11375 | 0.347292216 | 0.315939431  | 3.550794078 | 1.21901405  | 0.990482494 | NA |
| ASV_16s_11376 | 0.330914674 | 0.315939438  | 3.550804279 | 1.194546352 | 0.991051925 | NA |
| ASV_16s_11377 | 0.324643548 | 0.315939441  | 3.550808458 | 1.184849374 | 0.991271564 | NA |
| ASV_16s_11378 | 0.322605134 | 0.315939442  | 3.550809851 | 1.181662708 | 0.991342999 | NA |
| ASV_16s_11379 | 0.316809947 | 0.315939446  | 3.550813908 | 1.172486466 | 0.991546654 | NA |
| ASV_16s_11380 | 0.315783361 | 0.315939446  | 3.550814642 | 1.170842258 | 0.991582825 | NA |
| ASV_16s_11381 | 0.361256302 | 0.315939424  | 3.550786114 | 1.238949892 | 0.990002226 | NA |
| ASV_16s_11382 | 0.307570666 | 0.31593955   | 3.550820694 | 1.157495867 | NA          | NA |
| ASV_16s_11383 | 0.460431357 | 1.179821339  | 3.550065028 | 0.975130258 | 0.995219805 | NA |
| ASV_16s_11384 | 0.485756969 | 0.73484378   | 3.550797425 | 1.364578889 | 0.986631561 | NA |
| ASV_16s_11385 | 0.387533621 | 1.184625802  | 3.550264705 | 0.929131624 | NA          | NA |



|               |             |              |             |             |             |    |
|---------------|-------------|--------------|-------------|-------------|-------------|----|
| ASV_16s_11386 | 0.201549419 | 0.733773709  | 3.551107855 | 0.921913696 | NA          | NA |
| ASV_16s_11387 | 0.201549419 | 0.733773709  | 3.551107855 | 0.921913696 | NA          | NA |
| ASV_16s_11388 | 0.385200105 | 0.693518981  | 3.550744943 | 1.206248293 | 0.99078232  | NA |
| ASV_16s_11389 | 0.352190111 | 0.69345733   | 3.550762949 | 1.160808682 | 0.991801453 | NA |
| ASV_16s_11390 | 0.388997956 | 0.693527063  | 3.550743068 | 1.211223488 | NA          | NA |
| ASV_16s_11391 | 0.354097253 | 0.693460827  | 3.55076182  | 1.163531158 | 0.991742487 | NA |
| ASV_16s_11392 | 0.261095781 | 0.273413063  | 3.551162049 | 0.760766015 | NA          | NA |
| ASV_16s_11393 | 0.26578484  | -0.110477135 | 3.550284242 | 1.397486951 | NA          | NA |
| ASV_16s_11394 | 0.278613629 | -0.142215074 | 3.550191315 | 1.447324325 | NA          | NA |
| ASV_16s_11395 | 0.267827671 | -0.147125733 | 3.550240484 | 1.422196824 | NA          | NA |
| ASV_16s_11396 | 0.268604427 | -0.180720201 | 3.550212589 | 1.433717083 | 0.984516087 | NA |
| ASV_16s_11397 | 0.266342606 | -0.209937716 | 3.550207884 | 1.428033988 | 0.984697095 | NA |
| ASV_16s_11398 | 0.269899021 | -0.23592657  | 3.55017965  | 1.436333046 | 0.984432337 | NA |
| ASV_16s_11399 | 0.263067926 | -0.238521939 | 3.55021308  | 1.413335165 | 0.985159316 | NA |
| ASV_16s_11400 | 0.265853289 | -0.241887426 | 3.550197797 | 1.421700143 | 0.984897319 | NA |
| ASV_16s_11401 | 0.264846134 | -0.251634367 | 3.550200054 | 1.415609912 | 0.985088343 | NA |
| ASV_16s_11402 | 0.265105053 | -0.26293057  | 3.550196031 | 1.412491786 | 0.985185577 | NA |
| ASV_16s_11403 | 0.293206557 | -0.33440345  | 3.550057466 | 1.455012105 | 0.983826401 | NA |
| ASV_16s_11404 | 0.267406802 | -0.310645307 | 3.550175727 | 1.394488973 | 0.985739464 | NA |
| ASV_16s_11405 | 0.26817215  | -0.322950596 | 3.550171182 | 1.388072344 | 0.985933799 | NA |
| ASV_16s_11406 | 0.27625754  | -0.34195158  | 3.55013241  | 1.396347669 | 0.985682869 | NA |
| ASV_16s_11407 | 0.261352464 | -0.352423773 | 3.550207016 | 1.332275774 | NA          | NA |
| ASV_16s_11408 | 0.263884611 | -0.354698956 | 3.550194122 | 1.33813496  | 0.987391244 | NA |
| ASV_16s_11409 | 0.292750606 | -0.401465694 | 3.550068576 | 1.363008596 | 0.986677431 | NA |
| ASV_16s_11410 | 0.267204924 | -0.421176372 | 3.550194416 | 1.251897481 | 0.989682472 | NA |
| ASV_16s_11411 | 0.093338598 | -0.388940256 | 3.551496332 | 0.443536992 | NA          | NA |
| ASV_16s_11412 | 0.33813477  | -0.681031725 | 3.550052284 | 0.863738448 | NA          | NA |
| ASV_16s_11413 | 0.345034895 | -0.68114797  | 3.550026172 | 0.870227159 | 0.996659477 | NA |
| ASV_16s_11414 | 0.34555728  | -0.68115658  | 3.550024238 | 0.870713034 | 0.996653565 | NA |
| ASV_16s_11415 | 0.346717439 | -0.681175611 | 3.550019961 | 0.871789727 | 0.996640441 | NA |
| ASV_16s_11416 | 0.32654363  | -0.680825624 | 3.550098599 | 0.852540168 | NA          | NA |
| ASV_16s_11417 | 0.261460841 | -0.676285145 | 3.550426819 | 0.780846973 | NA          | NA |
| ASV_16s_11418 | 0.261460841 | -0.676285145 | 3.550426819 | 0.780846973 | NA          | NA |
| ASV_16s_11419 | 0.083303096 | -0.169274813 | 3.550825378 | 0.412044671 | NA          | NA |
| ASV_16s_11420 | 0.073890457 | -0.169113226 | 3.550865789 | 0.367141183 | NA          | NA |
| ASV_16s_11421 | 0.088655612 | -0.169350974 | 3.550806203 | 0.436354706 | NA          | NA |
| ASV_16s_11422 | 0.087835926 | 0.22018172   | 3.550905534 | 0.407693209 | NA          | NA |
| ASV_16s_11425 | 0.278178093 | 0.05222083   | 3.55013578  | 1.414960544 | 0.985108625 | NA |
| ASV_16s_11426 | 0.349923123 | -1.002362184 | 3.550082343 | 0.732810096 | 0.998070742 | NA |
| ASV_16s_11427 | 0.283931076 | 0.208044454  | 3.550030608 | 1.450327565 | 0.983979672 | NA |
| ASV_16s_11428 | 0.287808236 | 0.165123838  | 3.549946093 | 1.551547179 | 0.980471251 | NA |
| ASV_16s_11429 | 0.301712669 | 0.381653976  | 3.549890301 | 1.381066786 | NA          | NA |
| ASV_16s_11430 | 0.265961155 | -0.353641197 | 3.550002291 | 0.8753377   | NA          | NA |
| ASV_16s_11431 | 0.270868042 | -0.114129003 | 3.549962734 | 0.757441206 | NA          | NA |
| ASV_16s_11432 | 0.287016567 | -0.307750014 | 3.550650198 | 1.06236901  | 0.993758731 | NA |
| ASV_16s_11433 | 0.273103696 | 0.330139969  | 3.549987485 | 1.445903597 | NA          | NA |
| ASV_16s_11434 | 0.275703217 | 0.444635012  | 3.549962884 | 1.130922964 | 0.992431409 | NA |
| ASV_16s_11435 | 0.328098483 | -0.779710866 | 3.549819626 | 1.126264164 | NA          | NA |
| ASV_16s_11436 | 0.352127516 | -0.788210518 | 3.549684552 | 1.174168993 | NA          | NA |
| ASV_16s_11437 | 0.284928121 | -0.354176696 | 3.550289335 | 1.186413833 | 0.991236359 | NA |
| ASV_16s_11438 | 0.420628869 | -0.741579687 | 3.549529733 | 1.204236339 | 0.99082903  | NA |
| ASV_16s_11439 | 0.342252912 | -0.748723234 | 3.549738568 | 1.337129575 | 0.987419592 | NA |
| ASV_16s_11440 | 0.352029826 | -0.759114823 | 3.549685323 | 1.350493192 | NA          | NA |
| ASV_16s_11441 | 0.28745974  | 0.703611377  | 3.549865045 | 1.330268927 | NA          | NA |
| ASV_16s_11442 | 0.32173786  | 0.0222918    | 3.549360799 | 1.615809075 | 0.978027479 | NA |
| ASV_16s_11443 | 0.319166991 | -1.00867874  | 3.549711851 | 1.058939552 | NA          | NA |
| ASV_16s_11444 | 0.355308362 | -0.706293337 | 3.550494071 | 0.932058475 | 0.995851357 | NA |
| ASV_16s_11445 | 0.350803319 | -0.747806736 | 3.549716027 | 1.37230846  | NA          | NA |
| ASV_16s_11446 | 0.29490677  | 1.395840127  | 3.551016681 | 0.573810299 | NA          | NA |
| ASV_16s_11447 | 0.333499498 | -0.118297805 | 3.549504318 | 1.432635007 | NA          | NA |
| ASV_16s_11448 | 0.338126596 | -0.569900583 | 3.550371169 | 1.101752312 | NA          | NA |
| ASV_16s_11449 | 0.339775255 | -0.69531355  | 3.549853465 | 1.388970193 | 0.985906704 | NA |
| ASV_16s_11450 | 0.297533311 | -0.663806643 | 3.550632807 | 1.013331072 | NA          | NA |
| ASV_16s_11451 | 0.342048061 | -0.637324905 | 3.549973197 | 1.409731552 | 0.98527133  | NA |
| ASV_16s_11452 | 0.334529578 | -0.71746348  | 3.54992321  | 1.089787581 | 0.993247259 | NA |
| ASV_16s_11453 | 0.251932525 | 0.261221458  | 3.550801321 | 1.158694865 | NA          | NA |
| ASV_16s_11454 | 0.27851349  | -0.827119917 | 3.550219718 | 0.667524737 | NA          | NA |

|               |             |              |             |             |             |    |
|---------------|-------------|--------------|-------------|-------------|-------------|----|
| ASV_16s_11455 | 0.314295416 | -0.430784123 | 3.550403054 | 1.289429908 | 0.988719982 | NA |
| ASV_16s_11456 | 0.298119018 | -0.258410821 | 3.550627453 | 1.228222951 | NA          | NA |
| ASV_16s_11457 | 0.392695769 | 0.114879729  | 3.550139262 | 1.672267312 | NA          | NA |
| ASV_16s_11458 | 0.373349996 | 0.831048945  | 3.550465865 | 0.799221043 | 0.997451895 | NA |
| ASV_16s_11459 | 0.315598988 | 0.101554026  | 3.550845859 | 0.902337171 | 0.99625399  | NA |
| ASV_16s_11460 | 0.295583517 | 0.98913531   | 3.550615696 | 0.788454212 | 0.997560004 | NA |
| ASV_16s_11461 | 0.267794078 | 0.195202213  | 3.55091229  | 0.448099437 | 0.999615207 | NA |
| ASV_16s_11462 | 0.289462759 | 1.302235665  | 3.550624074 | 0.767763389 | NA          | NA |
| ASV_16s_11463 | 0.314306821 | 1.093812168  | 3.550323389 | 1.200109251 | NA          | NA |
| ASV_16s_11464 | 0.294297539 | 1.304908694  | 3.550604929 | 0.773394315 | 0.997706087 | NA |
| ASV_16s_11465 | 0.352771493 | 1.890590475  | 3.550006145 | 0.51333254  | 0.999396184 | NA |
| ASV_16s_11466 | 0.325405627 | 1.898035627  | 3.550037985 | 0.475616111 | NA          | NA |
| ASV_16s_11467 | 0.283320193 | 0.394694754  | 3.551017208 | 0.788427623 | NA          | NA |
| ASV_16s_11468 | 0.298697485 | -0.227881319 | 3.550721676 | 0.804967279 | NA          | NA |
| ASV_16s_11469 | 0.221595374 | -0.51454359  | 3.55100594  | 0.772375146 | NA          | NA |
| ASV_16s_11470 | 0.299147567 | -0.852416174 | 3.549901671 | 0.983741719 | 0.995086558 | NA |
| ASV_16s_11471 | 0.320159304 | -0.552532639 | 3.550103779 | 0.884926029 | NA          | NA |
| ASV_16s_11472 | 0.219556227 | 0.379955895  | 3.551391049 | 0.702989785 | NA          | NA |
| ASV_16s_11473 | 0.219556227 | 0.379955895  | 3.551391049 | 0.702989785 | NA          | NA |
| ASV_16s_11474 | 0.257864188 | -0.480147464 | 3.55081723  | 0.809645384 | NA          | NA |
| ASV_16s_11475 | 0.486936488 | -0.133346754 | 3.547949817 | 1.721784058 | 0.973625214 | NA |
| ASV_16s_11476 | 0.222465403 | 0.228893565  | 3.550892192 | 0.474751824 | NA          | NA |
| ASV_16s_11477 | 0.28934909  | -0.52891377  | 3.55054688  | 0.920566031 | NA          | NA |
| ASV_16s_11478 | 0.221303864 | -0.646063356 | 3.550445993 | 0.775955819 | 0.997681659 | NA |
| ASV_16s_11479 | 0.371828069 | -1.481618409 | 3.549295426 | 0.47099722  | NA          | NA |
| ASV_16s_11480 | 0.169671086 | 1.192961551  | 3.550920949 | 0.522445537 | NA          | NA |
| ASV_16s_11481 | 0.151967038 | -0.509793525 | 3.550746814 | 0.516834577 | NA          | NA |
| ASV_16s_11482 | 0.18931074  | 0.220047878  | 3.550729541 | 0.750115558 | 0.997920346 | NA |
| ASV_16s_11483 | 0.192246357 | 0.220046275  | 3.550727209 | 0.757669502 | NA          | NA |
| ASV_16s_11484 | 0.202516366 | 0.596111547  | 3.550685622 | 0.715633142 | NA          | NA |
| ASV_16s_11485 | 0.234700698 | 0.449209587  | 3.550888371 | 0.964154918 | NA          | NA |
| ASV_16s_11486 | 0.277327866 | -0.320532461 | 3.550038102 | 0.86357709  | NA          | NA |
| ASV_16s_11487 | 0.301748061 | 0.554018615  | 3.549757929 | 1.696009712 | 0.974738777 | NA |
| ASV_16s_11488 | 0.269807207 | -0.068347358 | 3.550504026 | 1.363974654 | 0.986649223 | NA |
| ASV_16s_11489 | 0.356125168 | 0.79381703   | 3.550218959 | 1.428294165 | NA          | NA |
| ASV_16s_11490 | 0.347410829 | 0.166012505  | 3.549565428 | 1.509487384 | 0.981979388 | NA |
| ASV_16s_11491 | 0.393652552 | 1.06022702   | 3.549514659 | 0.870983879 | NA          | NA |
| ASV_16s_11492 | 0.273099647 | -0.068763074 | 3.550134819 | 1.493349342 | NA          | NA |
| ASV_16s_11493 | 0.299138177 | 0.100964226  | 3.549661717 | 1.445561089 | NA          | NA |
| ASV_16s_11494 | 0.285539798 | 0.791172246  | 3.549844136 | 0.958589139 | NA          | NA |
| ASV_16s_11495 | 0.361626872 | 0.258715129  | 3.550147313 | 0.821168772 | NA          | NA |
| ASV_16s_11496 | 0.359126569 | 1.806432091  | 3.550085198 | 0.560819788 | 0.999191911 | NA |
| ASV_16s_11497 | 0.279541385 | -0.068005048 | 3.550185201 | 1.459290401 | NA          | NA |
| ASV_16s_11498 | 0.290365717 | -0.068059442 | 3.55015259  | 1.470825836 | NA          | NA |
| ASV_16s_11499 | 0.229232782 | 1.227925584  | 3.551121163 | 0.680110756 | NA          | NA |
| ASV_16s_11500 | 0.364502736 | 0.265430407  | 3.55045196  | 1.875028337 | NA          | NA |
| ASV_16s_11501 | 0.129281367 | 0.281999266  | 3.551676962 | 0.535247499 | NA          | NA |
| ASV_16s_11502 | 0.220020325 | -0.553643725 | 3.551048145 | 0.709632498 | NA          | NA |
| ASV_16s_11503 | 0.364556413 | -0.193775723 | 3.549915936 | 1.343806307 | NA          | NA |
| ASV_16s_11504 | 0.083597934 | -0.298824587 | 3.551621687 | 0.402050663 | NA          | NA |
| ASV_16s_11505 | 0.448240405 | 0.322488967  | 3.548742339 | 1.351450691 | 0.987012098 | NA |
| ASV_16s_11506 | 0.368374027 | 0.590842099  | 3.550747821 | 1.177683286 | 0.99143169  | NA |
| ASV_16s_11507 | 0.396419609 | 0.502700064  | 3.550673616 | 1.36564706  | 0.986600304 | NA |
| ASV_16s_11508 | 0.539906512 | -0.029538148 | 3.550669984 | 1.497741063 | 0.982387761 | NA |
| ASV_16s_11509 | 0.478368408 | -0.029478845 | 3.550689347 | 1.436304023 | NA          | NA |
| ASV_16s_11510 | 0.498514591 | 0.783495683  | 3.550316651 | 2.054198795 | 0.956779722 | NA |
| ASV_16s_11511 | 0.285926326 | -0.029133283 | 3.550803471 | 1.175431667 | NA          | NA |
| ASV_16s_11512 | 0.35492116  | 0.778302595  | 3.549440474 | 1.316853182 | NA          | NA |
| ASV_16s_11513 | 0.353848831 | 0.353221449  | 3.550163638 | 1.521327011 | NA          | NA |
| ASV_16s_11514 | 0.313749737 | 0.324661531  | 3.550843147 | 1.01937109  | NA          | NA |
| ASV_16s_11515 | 0.360955793 | 0.337366475  | 3.55083111  | 0.968186577 | 0.995325536 | NA |
| ASV_16s_11516 | 0.28994727  | 0.360367744  | 3.550944279 | 1.166555783 | NA          | NA |
| ASV_16s_11517 | 0.28994727  | 0.360367744  | 3.550944279 | 1.166555783 | NA          | NA |
| ASV_16s_11518 | 0.342675534 | 0.455962534  | 3.550775381 | 1.983560432 | 0.960744649 | NA |
| ASV_16s_11519 | 0.323326268 | 0.315939459  | 3.550809361 | 1.18276224  | 0.991318392 | NA |
| ASV_16s_11520 | 0.325498427 | 0.315939458  | 3.550807884 | 1.186157736 | 0.991242128 | NA |
| ASV_16s_11521 | 0.318237612 | 0.315939462  | 3.550812899 | 1.174739689 | 0.991496928 | NA |

|               |             |              |             |             |             |    |
|---------------|-------------|--------------|-------------|-------------|-------------|----|
| ASV_16s_11522 | 0.356471678 | 0.315939291  | 3.55078878  | 1.232151311 | 0.990167682 | NA |
| ASV_16s_11523 | 0.288404613 | 0.688163682  | 3.550784741 | 1.035083467 | NA          | NA |
| ASV_16s_11524 | 0.434482318 | 1.179567458  | 3.550134528 | 0.958139948 | NA          | NA |
| ASV_16s_11525 | 0.37210444  | 1.136480948  | 3.550415757 | 0.929060329 | 0.995893185 | NA |
| ASV_16s_11526 | 0.400618532 | 0.734682117  | 3.550844411 | 1.26683693  | NA          | NA |
| ASV_16s_11527 | 0.198448659 | 0.733745417  | 3.551116111 | 0.914331023 | NA          | NA |
| ASV_16s_11528 | 0.376903786 | 0.693504762  | 3.550749176 | 1.1951843   | 0.991037356 | NA |
| ASV_16s_11529 | 0.378224778 | 0.693507123  | 3.55074849  | 1.196958047 | 0.990996769 | NA |
| ASV_16s_11530 | 0.362502956 | 0.693477907  | 3.550756975 | 1.175424702 | 0.991481774 | NA |
| ASV_16s_11531 | 0.354990308 | 0.693463036  | 3.550761296 | 1.164794741 | 0.99171503  | NA |
| ASV_16s_11532 | 0.302838809 | 0.693341642  | 3.55079715  | 1.08440112  | NA          | NA |
| ASV_16s_11533 | 0.262194536 | -0.08075881  | 3.550336369 | 1.353313076 | NA          | NA |
| ASV_16s_11534 | 0.25713024  | -0.070683644 | 3.550377517 | 1.334212826 | NA          | NA |
| ASV_16s_11535 | 0.27209621  | -0.110153071 | 3.550252009 | 1.402590852 | NA          | NA |
| ASV_16s_11536 | 0.262453455 | -0.092974462 | 3.550320871 | 1.367450988 | NA          | NA |
| ASV_16s_11537 | 0.262971293 | -0.116889176 | 3.55029299  | 1.392046824 | NA          | NA |
| ASV_16s_11538 | 0.257164465 | -0.141212389 | 3.550302382 | 1.384527038 | NA          | NA |
| ASV_16s_11539 | 0.260461961 | -0.157753352 | 3.550270885 | 1.401413912 | 0.985527918 | NA |
| ASV_16s_11540 | 0.264006968 | -0.163165084 | 3.550248053 | 1.414742387 | 0.985115434 | NA |
| ASV_16s_11541 | 0.262251577 | -0.193531261 | 3.550237555 | 1.414078333 | 0.985136151 | NA |
| ASV_16s_11542 | 0.257192985 | -0.197563999 | 3.55026228  | 1.397386505 | 0.985651179 | NA |
| ASV_16s_11543 | 0.259230112 | -0.222617595 | 3.550239184 | 1.403284868 | 0.98547044  | NA |
| ASV_16s_11544 | 0.272120878 | -0.238540063 | 3.550168089 | 1.44238172  | 0.984237645 | NA |
| ASV_16s_11545 | 0.268732555 | -0.245277073 | 3.55018249  | 1.429930876 | 0.984636822 | NA |
| ASV_16s_11546 | 0.263287252 | -0.238775821 | 3.550211926 | 1.413925532 | 0.985140916 | NA |
| ASV_16s_11547 | 0.263045445 | -0.260572966 | 3.550207104 | 1.406556003 | 0.985369614 | NA |
| ASV_16s_11548 | 0.272971705 | -0.271585278 | 3.550155724 | 1.433460434 | 0.984524289 | NA |
| ASV_16s_11549 | 0.25722721  | -0.265103578 | 3.550236693 | 1.38554439  | NA          | NA |
| ASV_16s_11550 | 0.263056853 | -0.283140612 | 3.550201928 | 1.396673769 | 0.985672926 | NA |
| ASV_16s_11551 | 0.276206538 | -0.30799334  | 3.550133683 | 1.42396005  | 0.984826062 | NA |
| ASV_16s_11552 | 0.261318574 | -0.352383321 | 3.550207247 | 1.332150365 | 0.987559414 | NA |
| ASV_16s_11553 | 0.091880182 | -0.383580016 | 3.551509635 | 0.438984053 | NA          | NA |
| ASV_16s_11554 | 0.329787006 | -0.680884043 | 3.550085377 | 0.855690388 | NA          | NA |
| ASV_16s_11555 | 0.263199455 | -0.676851105 | 3.550417344 | 0.783018647 | NA          | NA |
| ASV_16s_11556 | 0.283898291 | 0.688152331  | 3.550788389 | 1.027121701 | NA          | NA |
| ASV_16s_11557 | 0.27840916  | -0.007345972 | 3.550107535 | 1.32834036  | 0.987665759 | NA |
| ASV_16s_11558 | 0.268524006 | 0.171626422  | 3.550111746 | 1.404028057 | 0.985447569 | NA |
| ASV_16s_11559 | 0.269131487 | 0.898518213  | 3.551118398 | 0.818570758 | NA          | NA |
| ASV_16s_11560 | 0.286742321 | 0.143941244  | 3.549701251 | 1.512063778 | 0.981889071 | NA |
| ASV_16s_11561 | 0.334254061 | -0.78350638  | 3.54982588  | 1.080993175 | 0.9934141   | NA |
| ASV_16s_11562 | 0.263375934 | -0.316665155 | 3.549933677 | 0.934632357 | NA          | NA |
| ASV_16s_11563 | 0.311917407 | 0.316207355  | 3.551655492 | 0.673296555 | NA          | NA |
| ASV_16s_11564 | 0.272743744 | 0.283472579  | 3.549992655 | 1.293845356 | NA          | NA |
| ASV_16s_11565 | 0.285450876 | 0.696694495  | 3.549881233 | 1.335759527 | 0.98745816  | NA |
| ASV_16s_11566 | 0.371686537 | -0.78748694  | 3.549549765 | 1.285812281 | 0.988815067 | NA |
| ASV_16s_11567 | 0.332756457 | -0.772400299 | 3.54975027  | 1.217958911 | 0.990507502 | NA |
| ASV_16s_11568 | 0.286799595 | 0.986302374  | 3.549892305 | 1.143701636 | 0.992165922 | NA |
| ASV_16s_11569 | 0.364651367 | -0.734528208 | 3.549908904 | 1.080697425 | NA          | NA |
| ASV_16s_11570 | 0.282563442 | 0.055524256  | 3.549622454 | 1.012049622 | 0.99463181  | NA |
| ASV_16s_11571 | 0.359232433 | -0.756641107 | 3.549673737 | 1.385192585 | NA          | NA |
| ASV_16s_11572 | 0.35529706  | -0.73758047  | 3.549901248 | 1.17415028  | 0.991509953 | NA |
| ASV_16s_11573 | 0.310756797 | -0.717940192 | 3.549885215 | 1.273679782 | NA          | NA |
| ASV_16s_11574 | 0.323540291 | -0.021071995 | 3.549885212 | 1.539243062 | NA          | NA |
| ASV_16s_11575 | 0.307471473 | 0.689792158  | 3.550745677 | 1.264324723 | NA          | NA |
| ASV_16s_11576 | 0.307155153 | -0.683029282 | 3.549954768 | 1.296262535 | 0.988539041 | NA |
| ASV_16s_11577 | 0.231783115 | 0.254403989  | 3.550037866 | 0.776613614 | NA          | NA |
| ASV_16s_11578 | 0.314037879 | -0.147280644 | 3.550486121 | 1.335074612 | NA          | NA |
| ASV_16s_11579 | 0.323336648 | -0.52214613  | 3.550249244 | 1.349968991 | 0.987054627 | NA |
| ASV_16s_11580 | 0.355629755 | 0.500789408  | 3.549506224 | 1.006065257 | NA          | NA |
| ASV_16s_11581 | 0.466630245 | -0.023235921 | 3.549394776 | 1.560451424 | 0.980142733 | NA |
| ASV_16s_11582 | 0.322936096 | -0.393025901 | 3.550452021 | 1.299041544 | 0.988464941 | NA |
| ASV_16s_11583 | 0.296416608 | -0.515861413 | 3.55051674  | 1.179180609 | NA          | NA |
| ASV_16s_11584 | 0.309396745 | -0.080338724 | 3.550534501 | 1.138271568 | NA          | NA |
| ASV_16s_11585 | 0.36997772  | -0.241496458 | 3.550581849 | 1.051601767 | 0.99395263  | NA |
| ASV_16s_11586 | 0.329079284 | -0.097864078 | 3.549576309 | 0.86573954  | 0.996713756 | NA |
| ASV_16s_11587 | 0.266014712 | 0.212512521  | 3.549851633 | 0.999977087 | NA          | NA |
| ASV_16s_11588 | 0.329747392 | -0.110811403 | 3.550678437 | 1.227682454 | 0.990275485 | NA |

|               |             |              |             |              |             |    |
|---------------|-------------|--------------|-------------|--------------|-------------|----|
| ASV_16s_11589 | 0.306978401 | -0.063131457 | 3.550829643 | 0.910408569  | 0.996147276 | NA |
| ASV_16s_11590 | 0.293169079 | -0.07182473  | 3.550281787 | 1.338260977  | 0.987387688 | NA |
| ASV_16s_11591 | 0.357304025 | -0.134209323 | 3.550628782 | 1.307802369  | 0.988229413 | NA |
| ASV_16s_11592 | 0.319678809 | 0.154244102  | 3.550753093 | 1.152990785  | 0.991969306 | NA |
| ASV_16s_11593 | 0.334496135 | -0.41367537  | 3.550264968 | -0.098189605 | 1           | NA |
| ASV_16s_11594 | 0.320621632 | 1.316404571  | 3.550503156 | 0.802132066  | NA          | NA |
| ASV_16s_11595 | 0.333700916 | 1.320634494  | 3.55045346  | 0.815438406  | NA          | NA |
| ASV_16s_11596 | 0.294169938 | 1.304838585  | 3.550605488 | 0.773228055  | NA          | NA |
| ASV_16s_11597 | 0.288957602 | 0.353751644  | 3.551812769 | 0.44564403   | NA          | NA |
| ASV_16s_11598 | 0.295392882 | 0.353712733  | 3.551837422 | 0.451612161  | NA          | NA |
| ASV_16s_11599 | 0.216125661 | 0.378961135  | 3.551411952 | 0.697653376  | NA          | NA |
| ASV_16s_11600 | 0.246083771 | 0.411523385  | 3.550885427 | 0.67434807   | NA          | NA |
| ASV_16s_11601 | 0.246083771 | 0.411523385  | 3.550885427 | 0.67434807   | NA          | NA |
| ASV_16s_11602 | 0.195006013 | 0.224900271  | 3.550781693 | 0.527552329  | 0.999339211 | NA |
| ASV_16s_11603 | 0.240860367 | 0.113581413  | 3.549903309 | 1.14827212   | 0.992069565 | NA |
| ASV_16s_11604 | 0.276598239 | -0.078964497 | 3.550712187 | 1.099476     | 0.993060386 | NA |
| ASV_16s_11605 | 0.260409692 | -0.078927259 | 3.550724452 | 1.069124184  | 0.993635088 | NA |
| ASV_16s_11606 | 0.265585111 | -0.07894112  | 3.550720369 | 1.079022136  | 0.99345113  | NA |
| ASV_16s_11607 | 0.174726381 | 0.220057741  | 3.550742299 | 0.710990753  | 0.998249856 | NA |
| ASV_16s_11608 | 0.178614392 | 0.220055004  | 3.550738696 | 0.72167274   | 0.998163615 | NA |
| ASV_16s_11609 | 0.181184557 | 0.220053201  | 3.550736399 | 0.728629732  | 0.998105958 | NA |
| ASV_16s_11610 | 0.281629284 | 0.310935973  | 3.550820425 | 1.090001855  | NA          | NA |
| ASV_16s_11611 | 0.461153191 | 0.394678108  | 3.549631844 | 1.971762811  | 0.96138667  | NA |
| ASV_16s_11612 | 0.296061263 | -1.240163933 | 3.54990217  | 0.522308119  | 0.999360629 | NA |
| ASV_16s_11613 | 0.304766812 | -0.203451339 | 3.550060924 | 0.951001759  | 0.995580699 | NA |
| ASV_16s_11614 | 0.275429406 | -0.068983928 | 3.550250198 | 1.478456193  | 0.983046146 | NA |
| ASV_16s_11615 | 0.270551294 | -0.068612595 | 3.550129348 | 1.480975067  | NA          | NA |
| ASV_16s_11616 | 0.293356045 | -0.185022892 | 3.550205053 | 1.541056726  | 0.980854141 | NA |
| ASV_16s_11617 | 0.351609404 | 0.312396997  | 3.550581998 | 0.906598216  | 0.996197896 | NA |
| ASV_16s_11618 | 0.310316947 | 1.566139036  | 3.550455049 | 0.52569598   | NA          | NA |
| ASV_16s_11619 | 0.324380837 | 0.319362113  | 3.550898826 | 0.919190208  | 0.996028954 | NA |
| ASV_16s_11620 | 0.154526435 | 0.28022016   | 3.551633082 | 0.59669654   | NA          | NA |
| ASV_16s_11621 | 0.214304718 | 0.279601464  | 3.551510424 | 0.714074417  | NA          | NA |
| ASV_16s_11622 | 0.328624813 | 0.716225704  | 3.550778423 | 1.337433379  | NA          | NA |
| ASV_16s_11623 | 0.076891323 | 0.286956961  | 3.551821729 | 0.378619787  | NA          | NA |
| ASV_16s_11624 | 0.127261345 | 0.282155268  | 3.551680997 | 0.529988112  | NA          | NA |
| ASV_16s_11625 | 0.426479504 | 0.074717427  | 3.550423919 | 1.521389589  | NA          | NA |
| ASV_16s_11626 | 0.364198332 | 1.139507725  | 3.550105863 | 1.354736453  | 0.986917485 | NA |
| ASV_16s_11627 | 0.316265465 | 1.057258024  | 3.550331845 | 1.226249702  | NA          | NA |
| ASV_16s_11628 | 0.281458727 | -0.02911981  | 3.550807971 | 1.167458153  | NA          | NA |
| ASV_16s_11629 | 0.281458727 | -0.02911981  | 3.550807971 | 1.167458153  | NA          | NA |
| ASV_16s_11630 | 0.314676302 | 0.340187094  | 3.550001875 | 1.581842975  | 0.979340253 | NA |
| ASV_16s_11631 | 0.328744189 | -0.07404966  | 3.550697032 | 1.210958295  | 0.990672393 | NA |
| ASV_16s_11632 | 0.398994516 | 0.613761071  | 3.550279431 | 1.868876608  | 0.966739839 | NA |
| ASV_16s_11633 | 0.321399968 | 0.348964568  | 3.550782079 | 0.903978188  | 0.996232451 | NA |
| ASV_16s_11634 | 0.285416844 | 0.360366052  | 3.550949825 | 1.158558202  | NA          | NA |
| ASV_16s_11635 | 0.285416844 | 0.360366052  | 3.550949825 | 1.158558202  | NA          | NA |
| ASV_16s_11636 | 0.285416844 | 0.360366052  | 3.550949825 | 1.158558202  | NA          | NA |
| ASV_16s_11637 | 0.523076054 | 0.36041559   | 3.550788357 | 1.465926424  | NA          | NA |
| ASV_16s_11638 | 0.433618302 | 0.31593943   | 3.550753009 | 1.331562149  | 0.987575869 | NA |
| ASV_16s_11639 | 0.324753933 | 0.315939475  | 3.550808392 | 1.184971612  | 0.991268816 | NA |
| ASV_16s_11640 | 0.316786588 | 0.31593948   | 3.550813935 | 1.172389054  | 0.9915488   | NA |
| ASV_16s_11641 | 0.314279613 | 0.315939481  | 3.550815737 | 1.168364227  | 0.991637156 | NA |
| ASV_16s_11642 | 0.308372822 | 0.315939486  | 3.550820097 | 1.158762284  | 0.9918456   | NA |
| ASV_16s_11643 | 0.306319648 | 0.315939487  | 3.550821653 | 1.155378859  | 0.991918265 | NA |
| ASV_16s_11644 | 0.357877065 | 0.3159393    | 3.550788001 | 1.234078201  | 0.990120971 | NA |
| ASV_16s_11645 | 0.35373655  | 0.616761224  | 3.549646321 | 1.4375864    | 0.984392114 | NA |
| ASV_16s_11646 | 0.283898291 | 0.688152331  | 3.550788389 | 1.027121701  | NA          | NA |
| ASV_16s_11647 | 0.283898291 | 0.688152331  | 3.550788389 | 1.027121701  | NA          | NA |
| ASV_16s_11648 | 0.395006875 | 1.171787941  | 3.550301332 | 0.936737199  | 0.995785535 | NA |
| ASV_16s_11649 | 0.394358867 | 0.734667473  | 3.550848669 | 1.258822735  | NA          | NA |
| ASV_16s_11650 | 0.394358867 | 0.734667473  | 3.550848669 | 1.258822735  | NA          | NA |
| ASV_16s_11651 | 0.397177592 | 1.047670054  | 3.550551009 | 1.003739314  | 0.99476799  | NA |
| ASV_16s_11652 | 0.371084326 | 0.693494456  | 3.550752258 | 1.18727022   | 0.99121705  | NA |
| ASV_16s_11653 | 0.383396721 | 0.693516492  | 3.550745856 | 1.203811319  | 0.990838878 | NA |
| ASV_16s_11654 | 0.252936538 | 0.274918167  | 3.551217972 | 0.750277297  | NA          | NA |
| ASV_16s_11655 | 0.256359523 | -0.11676878  | 3.550329759 | 1.36957745   | NA          | NA |

|               |             |              |             |             |             |    |
|---------------|-------------|--------------|-------------|-------------|-------------|----|
| ASV_16s_11656 | 0.258891671 | -0.121218525 | 3.550311168 | 1.380905695 | NA          | NA |
| ASV_16s_11657 | 0.260445184 | -0.190993166 | 3.550248617 | 1.407756311 | 0.985332511 | NA |
| ASV_16s_11658 | 0.265919008 | -0.252850367 | 3.550194457 | 1.418468131 | 0.984998876 | NA |
| ASV_16s_11659 | 0.261998697 | -0.259358112 | 3.550212844 | 1.403481661 | 0.985464386 | NA |
| ASV_16s_11660 | 0.285765919 | -0.306237273 | 3.550090836 | 1.45453517  | 0.983842045 | NA |
| ASV_16s_11661 | 0.259230447 | -0.290503729 | 3.550220455 | 1.380199568 | 0.986170027 | NA |
| ASV_16s_11662 | 0.260001499 | -0.3148585   | 3.550213406 | 1.367632809 | 0.986542078 | NA |
| ASV_16s_11663 | 0.25772827  | -0.324559674 | 3.550225075 | 1.352050131 | 0.986994869 | NA |
| ASV_16s_11664 | 0.257987189 | -0.336984365 | 3.550223824 | 1.338988786 | 0.987367138 | NA |
| ASV_16s_11665 | 0.263811129 | -0.342469752 | 3.550193543 | 1.352963695 | NA          | NA |
| ASV_16s_11666 | 0.253193221 | -0.370411433 | 3.55025414  | 1.28040877  | NA          | NA |
| ASV_16s_11667 | 0.253221741 | -0.439207538 | 3.550278813 | 1.178612341 | NA          | NA |
| ASV_16s_11668 | 0.283299697 | -0.679883152 | 3.55030459  | 0.806937597 | 0.997372507 | NA |
| ASV_16s_11669 | 0.25329019  | -0.672960009 | 3.550470973 | 0.770251318 | NA          | NA |
| ASV_16s_11670 | 0.080699874 | -0.169232812 | 3.550835629 | 0.39990141  | NA          | NA |
| ASV_16s_11671 | 0.048622886 | -0.164038258 | 3.55103376  | 0.230518159 | NA          | NA |
| ASV_16s_11672 | 0.085091053 | 0.220189748  | 3.550916103 | 0.395428746 | NA          | NA |
| ASV_16s_11673 | 0.26428401  | -0.015744194 | 3.550180925 | 1.348119129 | 0.987107603 | NA |
| ASV_16s_11674 | 0.274798903 | 0.105423456  | 3.549982133 | 1.41519037  | 0.985101449 | NA |
| ASV_16s_11675 | 0.2887599   | -0.423068968 | 3.550329609 | 1.249142788 | 0.989751033 | NA |
| ASV_16s_11676 | 0.337114341 | -0.766221509 | 3.549941094 | 0.965926611 | 0.99535962  | NA |
| ASV_16s_11677 | 0.259611939 | 0.268114252  | 3.550171724 | 1.277339236 | NA          | NA |
| ASV_16s_11678 | 0.262776777 | -0.084850068 | 3.551054056 | 0.974643893 | NA          | NA |
| ASV_16s_11679 | 0.348202628 | -0.79024477  | 3.549925562 | 1.203245994 | 0.990851967 | NA |
| ASV_16s_11680 | 0.316488416 | -0.759539087 | 3.549836843 | 1.188608979 | NA          | NA |
| ASV_16s_11681 | 0.357883043 | -0.779885613 | 3.549618685 | 1.282291554 | 0.988907128 | NA |
| ASV_16s_11682 | 0.33496285  | -0.757290024 | 3.549750366 | 1.284330549 | 0.988853869 | NA |
| ASV_16s_11683 | 0.305266901 | 0.093522844  | 3.549700433 | 1.589168868 | 0.97906112  | NA |
| ASV_16s_11684 | 0.322565567 | -0.732453164 | 3.549827933 | 1.290236187 | NA          | NA |
| ASV_16s_11685 | 0.321240993 | -0.72858507  | 3.549837788 | 1.29559884  | 0.988556695 | NA |
| ASV_16s_11686 | 0.321004015 | -0.744025939 | 3.549819157 | 1.272369253 | NA          | NA |
| ASV_16s_11687 | 0.341549797 | 0.986935409  | 3.549725332 | 1.351294486 | NA          | NA |
| ASV_16s_11688 | 0.270582959 | -0.219314429 | 3.549958284 | 1.144695839 | NA          | NA |
| ASV_16s_11689 | 0.33395763  | -0.711032812 | 3.54983067  | 1.359351182 | 0.986783895 | NA |
| ASV_16s_11690 | 0.334951851 | -0.702237094 | 3.549846985 | 1.369594198 | 0.986484415 | NA |
| ASV_16s_11691 | 0.333051973 | -0.694310856 | 3.549869151 | 1.369514031 | 0.986486775 | NA |
| ASV_16s_11692 | 0.27664093  | -0.202728063 | 3.549988872 | 1.171796652 | NA          | NA |
| ASV_16s_11693 | 0.334510493 | -0.684989584 | 3.549889473 | 1.379665936 | 0.986185951 | NA |
| ASV_16s_11694 | 0.329826421 | -0.635637995 | 3.550335134 | 0.96882297  | NA          | NA |
| ASV_16s_11695 | 0.331818538 | -0.676371319 | 3.549913723 | 1.376216629 | 0.986288614 | NA |
| ASV_16s_11696 | 0.332947336 | -0.629068239 | 3.550003549 | 1.384269669 | 0.986048204 | NA |
| ASV_16s_11697 | 0.286473106 | -0.72512359  | 3.550116059 | 0.908071123 | NA          | NA |
| ASV_16s_11698 | 0.323113616 | -0.588071296 | 3.550104831 | 1.357662117 | 0.986832887 | NA |
| ASV_16s_11699 | 0.260962634 | 0.327797546  | 3.550810367 | 1.637675358 | 0.977157218 | NA |
| ASV_16s_11700 | 0.316591276 | -0.562081505 | 3.550172732 | 1.338880898 | 0.987370185 | NA |
| ASV_16s_11701 | 0.305808893 | -0.988277211 | 3.550051043 | 0.835115761 | 0.997068852 | NA |
| ASV_16s_11702 | 0.282287105 | 0.678559474  | 3.550875349 | 1.168573109 | NA          | NA |
| ASV_16s_11703 | 0.362054258 | -0.495176132 | 3.549676548 | 1.050249758 | NA          | NA |
| ASV_16s_11704 | 0.283206918 | -0.753472438 | 3.550201549 | 0.908518653 | NA          | NA |
| ASV_16s_11705 | 0.33438984  | 0.678180631  | 3.550824131 | 1.244598961 | 0.989863503 | NA |
| ASV_16s_11706 | 0.321157957 | 0.110363542  | 3.55060735  | 1.210198384 | 0.990690183 | NA |
| ASV_16s_11707 | 0.243779323 | 0.333760238  | 3.551879489 | 0.50458514  | NA          | NA |
| ASV_16s_11708 | 0.333092742 | -0.051185263 | 3.550717693 | 1.246804266 | 0.989809013 | NA |
| ASV_16s_11709 | 0.352590371 | 1.326452521  | 3.550387857 | 0.833760884 | NA          | NA |
| ASV_16s_11710 | 0.212695095 | 0.377950911  | 3.551433445 | 0.692240308 | NA          | NA |
| ASV_16s_11711 | 0.172610797 | -0.312587313 | 3.551522392 | 0.59738898  | NA          | NA |
| ASV_16s_11712 | 0.281333958 | -0.127214912 | 3.550711222 | 0.396940898 | 0.999743243 | NA |
| ASV_16s_11713 | 0.280513354 | 0.008814662  | 3.549751715 | 0.724311828 | 0.998141882 | NA |
| ASV_16s_11714 | 0.305962692 | 0.418804757  | 3.550560917 | 0.745560849 | NA          | NA |
| ASV_16s_11715 | 0.239713863 | -0.113022801 | 3.549982838 | 1.222654773 | NA          | NA |
| ASV_16s_11716 | 0.091235799 | 0.345506706  | 3.551720209 | 0.36248365  | NA          | NA |
| ASV_16s_11717 | 0.147218068 | -0.503813626 | 3.550792375 | 0.506876757 | NA          | NA |
| ASV_16s_11718 | 0.240555145 | -0.54705965  | 3.550063885 | 0.662062775 | 0.998610551 | NA |
| ASV_16s_11719 | 0.178792968 | -0.532468981 | 3.550503529 | 0.568101557 | NA          | NA |
| ASV_16s_11720 | 0.163859908 | -0.520316687 | 3.550641445 | 0.54038488  | NA          | NA |
| ASV_16s_11721 | 0.163859908 | -0.520316687 | 3.550641445 | 0.54038488  | NA          | NA |
| ASV_16s_11722 | 0.250164282 | -0.078898433 | 3.550733035 | 1.048927898 | NA          | NA |

|               |             |              |             |             |             |    |
|---------------|-------------|--------------|-------------|-------------|-------------|----|
| ASV_16s_11723 | 0.25792741  | -0.07892069  | 3.550726472 | 1.064281025 | 0.993723891 | NA |
| ASV_16s_11724 | 0.172788897 | 0.220059166  | 3.550744158 | 0.70556517  | 0.99829261  | NA |
| ASV_16s_11725 | 0.186238658 | 0.220049991  | 3.550732069 | 0.742054084 | NA          | NA |
| ASV_16s_11726 | 0.186238658 | 0.220049991  | 3.550732069 | 0.742054084 | NA          | NA |
| ASV_16s_11727 | 0.186238658 | 0.220049991  | 3.550732069 | 0.742054084 | NA          | NA |
| ASV_16s_11728 | 0.196589672 | 0.224085006  | 3.550795568 | 0.600543537 | NA          | NA |
| ASV_16s_11729 | 0.255887548 | -0.89586339  | 3.550499626 | 0.569896601 | 0.999148178 | NA |
| ASV_16s_11730 | 0.381167697 | 1.092476757  | 3.550307468 | 1.234234584 | NA          | NA |
| ASV_16s_11731 | 0.305421669 | -0.287535996 | 3.550864148 | 0.562875647 | NA          | NA |
| ASV_16s_11732 | 0.260768378 | -0.068809562 | 3.550585571 | 1.289032067 | 0.988730463 | NA |
| ASV_16s_11733 | 0.268136069 | 4.30E-04     | 3.550371186 | 1.489928658 | NA          | NA |
| ASV_16s_11734 | 0.288339339 | -0.069032147 | 3.550176867 | 1.527267994 | NA          | NA |
| ASV_16s_11735 | 0.270218675 | -0.068907333 | 3.550212624 | 1.47495301  | 0.983164138 | NA |
| ASV_16s_11736 | 0.26255224  | -0.068845577 | 3.550230344 | 1.451433347 | NA          | NA |
| ASV_16s_11737 | 0.189859151 | -0.251664202 | 3.550691595 | 0.743744401 | NA          | NA |
| ASV_16s_11738 | 0.290563155 | -0.045596555 | 3.550890236 | 1.206101687 | NA          | NA |
| ASV_16s_11739 | 0.313791141 | 0.71489148   | 3.550792249 | 1.317437692 | NA          | NA |
| ASV_16s_11740 | 0.075670826 | 0.287098327  | 3.551826397 | 0.374341252 | NA          | NA |
| ASV_16s_11741 | 0.353248201 | 0.29109028   | 3.551082233 | 0.891702061 | NA          | NA |
| ASV_16s_11742 | 0.080985499 | -0.290725471 | 3.551633868 | 0.393406427 | NA          | NA |
| ASV_16s_11743 | 0.439874805 | -0.033096746 | 3.548875791 | 1.357445705 | 0.986839156 | NA |
| ASV_16s_11744 | 0.390504013 | -0.039696189 | 3.550273381 | 1.465009655 | 0.983496361 | NA |
| ASV_16s_11745 | 0.330133279 | 0.801952342  | 3.550672877 | 1.20120921  | 0.990899029 | NA |
| ASV_16s_11746 | 0.310771921 | 0.801947173  | 3.550692007 | 1.159170942 | 0.991836796 | NA |
| ASV_16s_11747 | 0.209943581 | -0.078757067 | 3.550774781 | 0.961515843 | NA          | NA |
| ASV_16s_11748 | 0.263770365 | -0.116317886 | 3.550166162 | 1.361612591 | NA          | NA |
| ASV_16s_11749 | 0.4145578   | 0.0836717    | 3.550493715 | 1.990754076 | 0.960350334 | NA |
| ASV_16s_11750 | 0.357827401 | 0.353296018  | 3.550113566 | 1.557972652 | 0.980234512 | NA |
| ASV_16s_11751 | 0.374064214 | 0.725143233  | 3.550263277 | 1.271449437 | 0.989187693 | NA |
| ASV_16s_11752 | 0.326007162 | 0.19938695   | 3.550237566 | 1.625332488 | NA          | NA |
| ASV_16s_11753 | 0.382723005 | 0.692214053  | 3.55084299  | 1.419642019 | NA          | NA |
| ASV_16s_11754 | 0.302538309 | -0.073993312 | 3.550712903 | 1.168825506 | 0.991627059 | NA |
| ASV_16s_11755 | 0.264471366 | 0.160522825  | 3.550778114 | 1.793029531 | 0.970403073 | NA |
| ASV_16s_11756 | 0.280886418 | 0.360364305  | 3.550955548 | 1.150433679 | NA          | NA |
| ASV_16s_11757 | 0.280886418 | 0.360364305  | 3.550955548 | 1.150433679 | NA          | NA |
| ASV_16s_11758 | 0.280886418 | 0.360364305  | 3.550955548 | 1.150433679 | NA          | NA |
| ASV_16s_11759 | 0.280886418 | 0.360364305  | 3.550955548 | 1.150433679 | NA          | NA |
| ASV_16s_11760 | 0.280886418 | 0.360364305  | 3.550955548 | 1.150433679 | NA          | NA |
| ASV_16s_11761 | 0.299876813 | 0.315939508  | 3.550826676 | 1.144587092 | 0.992147312 | NA |
| ASV_16s_11762 | 0.293375097 | 0.315939513  | 3.550831962 | 1.133490191 | NA          | NA |
| ASV_16s_11763 | 0.293375097 | 0.482878181  | 3.55080615  | 1.83421098  | 0.968443939 | NA |
| ASV_16s_11764 | 0.388099203 | 0.734652358  | 3.550853063 | 1.250680696 | NA          | NA |
| ASV_16s_11765 | 0.311864358 | 0.693364734  | 3.550790102 | 1.099176823 | 0.993066205 | NA |
| ASV_16s_11766 | 0.341535024 | 0.693431878  | 3.550769512 | 1.145163765 | 0.992135177 | NA |
| ASV_16s_11767 | 0.373276763 | 0.693498693  | 3.550751099 | 1.190174656 | 0.991151367 | NA |
| ASV_16s_11768 | 0.248856916 | 0.275688147  | 3.551247206 | 0.744913344 | NA          | NA |
| ASV_16s_11769 | 0.249633673 | 0.188149415  | 3.550987759 | 0.881576079 | NA          | NA |
| ASV_16s_11770 | 0.253517455 | -0.063113355 | 3.550408874 | 1.302001169 | NA          | NA |
| ASV_16s_11771 | 0.24898811  | -0.115258941 | 3.550374454 | 1.344521056 | NA          | NA |
| ASV_16s_11772 | 0.255847725 | -0.173118038 | 3.550285044 | 1.389575416 | 0.985888421 | NA |
| ASV_16s_11773 | 0.251289859 | -0.166117598 | 3.550315798 | 1.372491739 | 0.986398956 | NA |
| ASV_16s_11774 | 0.271178372 | -0.205443647 | 3.550186278 | 1.438657929 | 0.984357677 | NA |
| ASV_16s_11775 | 0.256365562 | -0.1963681   | 3.550267593 | 1.394348765 | 0.985743728 | NA |
| ASV_16s_11776 | 0.249033742 | -0.208851347 | 3.550302149 | 1.369468946 | 0.986488102 | NA |
| ASV_16s_11777 | 0.268446115 | -0.244904836 | 3.550184171 | 1.427129214 | 0.984725794 | NA |
| ASV_16s_11778 | 0.270317562 | -0.257855892 | 3.55017152  | 1.431043991 | 0.984601386 | NA |
| ASV_16s_11779 | 0.257660157 | -0.254253221 | 3.55023701  | 1.390754236 | 0.985852771 | NA |
| ASV_16s_11780 | 0.265713858 | -0.285993531 | 3.55018799  | 1.403137    | 0.985474987 | NA |
| ASV_16s_11781 | 0.24907367  | -0.291124471 | 3.550276253 | 1.345917974 | NA          | NA |
| ASV_16s_11782 | 0.271947751 | -0.326490111 | 3.550152864 | 1.396959152 | 0.985664221 | NA |
| ASV_16s_11783 | 0.269620663 | -0.38420677  | 3.550170573 | 1.316546325 | 0.987991416 | NA |
| ASV_16s_11784 | 0.350141111 | -0.681232482 | 3.550007659 | 0.874888476 | NA          | NA |
| ASV_16s_11785 | 0.249204864 | -0.671054784 | 3.550493144 | 0.764809731 | NA          | NA |
| ASV_16s_11786 | 0.249204864 | -0.671054784 | 3.550493144 | 0.764809731 | NA          | NA |
| ASV_16s_11787 | 0.079398263 | -0.16921153  | 3.550841006 | 0.393748152 | NA          | NA |
| ASV_16s_11788 | 0.110683922 | 0.220130375  | 3.550837904 | 0.501711555 | NA          | NA |
| ASV_16s_11789 | 0.273654221 | -0.157920221 | 3.5501402   | 1.349823045 | 0.987058811 | NA |

|               |             |              |             |             |             |    |
|---------------|-------------|--------------|-------------|-------------|-------------|----|
| ASV_16s_11790 | 0.271640696 | -0.143901041 | 3.550145891 | 1.205007535 | 0.990811143 | NA |
| ASV_16s_11791 | 0.260033527 | -0.368339129 | 3.550333278 | 0.766882981 | NA          | NA |
| ASV_16s_11792 | 0.338833436 | -0.777383695 | 3.549895283 | 1.004746064 | 0.994751612 | NA |
| ASV_16s_11793 | 0.270538085 | 0.170684668  | 3.549758899 | 1.463389757 | 0.983550109 | NA |
| ASV_16s_11794 | 0.269330327 | 0.004243797  | 3.549685833 | 1.358376321 | 0.986812185 | NA |
| ASV_16s_11795 | 0.337278002 | -0.776844413 | 3.549731738 | 1.199027572 | NA          | NA |
| ASV_16s_11796 | 0.286409065 | -0.734819569 | 3.550058198 | 1.130405524 | NA          | NA |
| ASV_16s_11797 | 0.340891616 | -0.77404171  | 3.54992778  | 1.072843122 | 0.99356636  | NA |
| ASV_16s_11798 | 0.322872306 | -0.760432914 | 3.549800653 | 1.215868916 | 0.990556918 | NA |
| ASV_16s_11799 | 0.297165201 | 0.373516253  | 3.55008532  | 1.497654067 | NA          | NA |
| ASV_16s_11800 | 0.334383708 | -0.726206205 | 3.549802613 | 1.345055752 | 0.987195041 | NA |
| ASV_16s_11801 | 0.268423961 | 0.68716489   | 3.550877271 | 1.156550908 | NA          | NA |
| ASV_16s_11802 | 0.329052563 | -0.68616111  | 3.549897118 | 1.362771444 | 0.98668435  | NA |
| ASV_16s_11803 | 0.344620341 | 0.322546888  | 3.551577606 | 0.70717735  | NA          | NA |
| ASV_16s_11804 | 0.30717748  | 1.231404706  | 3.549535119 | 0.939810015 | 0.99574194  | NA |
| ASV_16s_11805 | 0.328495893 | 0.320020351  | 3.549048796 | 1.297358836 | 0.988509844 | NA |
| ASV_16s_11806 | 0.270471585 | -0.210347101 | 3.549839439 | 1.10963964  | NA          | NA |
| ASV_16s_11807 | 0.265525226 | 0.342700691  | 3.551785929 | 0.547527869 | NA          | NA |
| ASV_16s_11808 | 0.248047982 | -0.149745838 | 3.550715387 | 1.61417162  | 0.978091854 | NA |
| ASV_16s_11809 | 0.344471711 | 0.029984332  | 3.550489404 | 1.282882667 | 0.988891704 | NA |
| ASV_16s_11810 | 0.263158874 | 0.250056311  | 3.551584482 | 0.201411119 | 0.999974231 | NA |
| ASV_16s_11811 | 0.344020886 | -0.350290656 | 3.551183923 | 0.473673299 | 0.999537283 | NA |
| ASV_16s_11812 | 0.277461322 | -0.325054551 | 3.549836285 | 1.138561347 | 0.992273408 | NA |
| ASV_16s_11813 | 0.343165863 | 0.165977304  | 3.550628825 | 1.221201441 | 0.990430518 | NA |
| ASV_16s_11814 | 0.326915822 | 1.200851334  | 3.550331928 | 0.799611683 | NA          | NA |
| ASV_16s_11815 | 0.413005994 | 1.0535909    | 3.550922188 | 0.93455396  | 0.995816333 | NA |
| ASV_16s_11816 | 0.28483121  | 1.299440336  | 3.550642761 | 0.762175686 | NA          | NA |
| ASV_16s_11817 | 0.270039559 | 0.392301889  | 3.551095309 | 0.77247754  | NA          | NA |
| ASV_16s_11818 | 0.270039559 | 0.392301889  | 3.551095309 | 0.77247754  | NA          | NA |
| ASV_16s_11819 | 0.283348841 | 0.39469333   | 3.551017254 | 0.788397673 | NA          | NA |
| ASV_16s_11820 | 0.285692264 | 0.354291683  | 3.551857304 | 0.447932714 | NA          | NA |
| ASV_16s_11821 | 0.375277908 | 0.364966962  | 3.551664944 | 0.500009709 | NA          | NA |
| ASV_16s_11822 | 0.29520743  | -1.196496663 | 3.550038019 | 0.49724421  | NA          | NA |
| ASV_16s_11823 | 0.286940786 | -1.130486767 | 3.550137301 | 0.516623162 | 0.999383309 | NA |
| ASV_16s_11824 | 0.208994832 | -0.550827743 | 3.550575499 | 0.686939054 | NA          | NA |
| ASV_16s_11825 | 0.208994832 | -0.550827743 | 3.550575499 | 0.686939054 | NA          | NA |
| ASV_16s_11826 | 0.253389027 | -0.792042387 | 3.550465614 | 0.626585611 | NA          | NA |
| ASV_16s_11827 | 0.344576208 | 1.89959046   | 3.54999931  | 0.498411734 | NA          | NA |
| ASV_16s_11828 | 0.205831541 | -0.177004447 | 3.550115301 | 0.876751877 | NA          | NA |
| ASV_16s_11829 | 0.257801411 | 0.414792228  | 3.550827169 | 0.68983746  | NA          | NA |
| ASV_16s_11830 | 0.089764254 | 0.345251304  | 3.551724927 | 0.358081422 | NA          | NA |
| ASV_16s_11831 | 0.207395365 | -0.542278495 | 3.550273986 | 0.614934565 | NA          | NA |
| ASV_16s_11832 | 0.144843583 | -0.500750233 | 3.550816126 | 0.501810535 | NA          | NA |
| ASV_16s_11833 | 0.17590921  | -0.53117386  | 3.550530217 | 0.562963238 | NA          | NA |
| ASV_16s_11834 | 0.161217006 | -0.520660819 | 3.550664692 | 0.535484548 | NA          | NA |
| ASV_16s_11835 | 0.254492758 | -0.078911239 | 3.550729332 | 1.057512554 | 0.993846669 | NA |
| ASV_16s_11836 | 0.171911779 | 0.220059706  | 3.550745014 | 0.703077229 | 0.998311981 | NA |
| ASV_16s_11837 | 0.17509288  | 0.220057386  | 3.550741958 | 0.711956471 | 0.998242173 | NA |
| ASV_16s_11838 | 0.183234809 | 0.220051937  | 3.550734619 | 0.734077453 | NA          | NA |
| ASV_16s_11839 | 0.277838788 | -0.929366795 | 3.550143148 | 0.634588474 | 0.998789414 | NA |
| ASV_16s_11840 | 0.31764812  | 0.832459777  | 3.550213748 | 1.202545022 | NA          | NA |
| ASV_16s_11841 | 0.278634577 | -0.068387876 | 3.550123724 | 1.477797681 | 0.983068363 | NA |
| ASV_16s_11842 | 0.289779023 | -0.059308795 | 3.550528284 | 1.072168176 | NA          | NA |
| ASV_16s_11843 | 0.236323211 | 0.505683649  | 3.550596727 | 0.953617952 | NA          | NA |
| ASV_16s_11844 | 0.310591533 | -0.327235284 | 3.549615077 | 1.430388955 | NA          | NA |
| ASV_16s_11845 | 0.276620274 | -0.059083352 | 3.550447253 | 1.322774844 | NA          | NA |
| ASV_16s_11846 | 0.315532321 | 1.154892895  | 3.550664434 | 0.772399143 | NA          | NA |
| ASV_16s_11847 | 0.123221303 | 0.282474067  | 3.551689342 | 0.51928436  | NA          | NA |
| ASV_16s_11848 | 0.54511944  | -0.607885337 | 3.549890232 | 1.00657201  | NA          | NA |
| ASV_16s_11849 | 0.485319516 | -0.14625962  | 3.54882216  | 1.557370842 | NA          | NA |
| ASV_16s_11850 | 0.357742665 | 0.436848206  | 3.550749387 | 1.196409123 | 0.991009342 | NA |
| ASV_16s_11851 | 0.326915822 | -0.548533311 | 3.549702477 | 0.75991478  | NA          | NA |
| ASV_16s_11852 | 0.320387683 | 1.034293503  | 3.550372085 | 1.226742095 | 0.990298076 | NA |
| ASV_16s_11853 | 0.642530791 | -0.029612566 | 3.55064592  | 1.586203481 | NA          | NA |
| ASV_16s_11854 | 0.449814936 | 0.426750231  | 3.550744949 | 2.344755167 | 0.938326699 | NA |
| ASV_16s_11855 | 0.407652474 | 0.12337479   | 3.550503959 | 1.947927881 | 0.962666085 | NA |
| ASV_16s_11856 | 0.367171527 | 0.312524593  | 3.54933171  | 1.444814876 | 0.984158916 | NA |

|               |             |              |             |             |             |    |
|---------------|-------------|--------------|-------------|-------------|-------------|----|
| ASV_16s_11857 | 0.312012554 | -0.264404065 | 3.55002471  | 1.22428642  | 0.990356915 | NA |
| ASV_16s_11858 | 0.480604636 | 0.337913492  | 3.549684111 | 1.956016256 | NA          | NA |
| ASV_16s_11859 | 0.413918789 | 0.348963064  | 3.549912115 | 2.532048558 | NA          | NA |
| ASV_16s_11860 | 0.272523529 | -0.029090195 | 3.550817411 | 1.151142924 | NA          | NA |
| ASV_16s_11861 | 0.324094966 | 0.089104455  | 3.550345807 | 1.717816602 | 0.973798426 | NA |
| ASV_16s_11862 | 0.228538853 | 0.030724047  | 3.550763271 | 1.037577468 | NA          | NA |
| ASV_16s_11863 | 0.290898454 | 0.342368992  | 3.550046182 | 1.507479548 | NA          | NA |
| ASV_16s_11864 | 0.348874612 | 0.329407672  | 3.550818858 | 1.042671947 | 0.994110497 | NA |
| ASV_16s_11865 | 0.276355992 | 0.3603625    | 3.550961459 | 1.1421805   | NA          | NA |
| ASV_16s_11866 | 0.276355992 | 0.3603625    | 3.550961459 | 1.1421805   | NA          | NA |
| ASV_16s_11867 | 0.276355992 | 0.3603625    | 3.550961459 | 1.1421805   | NA          | NA |
| ASV_16s_11868 | 0.323026974 | 0.315939367  | 3.550809579 | 1.182213708 | 0.991330673 | NA |
| ASV_16s_11869 | 0.359191231 | 0.315939355  | 3.550787269 | 1.235936662 | 0.990075789 | NA |
| ASV_16s_11870 | 0.306750089 | 0.379529404  | 3.55080578  | 1.604153178 | 0.97848332  | NA |
| ASV_16s_11871 | 0.308922248 | 0.315939373  | 3.550819694 | 1.159601646 | 0.991827511 | NA |
| ASV_16s_11872 | 0.303677708 | 0.315939375  | 3.550823695 | 1.150928795 | 0.992013216 | NA |
| ASV_16s_11873 | 0.2995935   | 0.315939522  | 3.550826907 | 1.144080694 | 0.992157959 | NA |
| ASV_16s_11874 | 0.381839538 | 0.734635771  | 3.550857601 | 1.24240657  | NA          | NA |
| ASV_16s_11875 | 0.381839538 | 0.734635771  | 3.550857601 | 1.24240657  | NA          | NA |
| ASV_16s_11876 | 0.189146378 | 0.733654209  | 3.551142491 | 0.890975011 | NA          | NA |
| ASV_16s_11877 | 0.189146378 | 0.733654209  | 3.551142491 | 0.890975011 | NA          | NA |
| ASV_16s_11878 | 0.333274656 | 0.693417212  | 3.550774881 | 1.132748316 | 0.992393838 | NA |
| ASV_16s_11879 | 0.36505962  | 0.693483579  | 3.550755557 | 1.178919401 | NA          | NA |
| ASV_16s_11880 | 0.319540012 | 0.693384481  | 3.550784421 | 1.111409158 | 0.992825761 | NA |
| ASV_16s_11881 | 0.244777294 | 0.27609809   | 3.551273547 | 0.739391822 | NA          | NA |
| ASV_16s_11882 | 0.244777294 | 0.27609809   | 3.551273547 | 0.739391822 | NA          | NA |
| ASV_16s_11883 | 0.244777294 | 0.27609809   | 3.551273547 | 0.739391822 | NA          | NA |
| ASV_16s_11884 | 0.25021459  | -0.105485649 | 3.550377563 | 1.335073925 | NA          | NA |
| ASV_16s_11885 | 0.244902784 | -0.10757979  | 3.550407775 | 1.326124282 | NA          | NA |
| ASV_16s_11886 | 0.250991347 | -0.142420537 | 3.550336721 | 1.363857651 | NA          | NA |
| ASV_16s_11887 | 0.250991347 | -0.142420537 | 3.550336721 | 1.363857651 | NA          | NA |
| ASV_16s_11888 | 0.251250265 | -0.154479221 | 3.550325092 | 1.368964472 | 0.986502945 | NA |
| ASV_16s_11889 | 0.252027022 | -0.19014213  | 3.550295488 | 1.379034242 | 0.986204788 | NA |
| ASV_16s_11890 | 0.244942712 | -0.191272814 | 3.550336133 | 1.354679294 | 0.986919134 | NA |
| ASV_16s_11891 | 0.244948416 | -0.203013025 | 3.550329274 | 1.355280914 | 0.986901766 | NA |
| ASV_16s_11892 | 0.258806628 | -0.233171248 | 3.550237556 | 1.398609384 | 0.98561382  | NA |
| ASV_16s_11893 | 0.244959825 | -0.22656812  | 3.550317981 | 1.353691632 | 0.986947616 | NA |
| ASV_16s_11894 | 0.264946308 | -0.262688842 | 3.550197172 | 1.411712162 | 0.985209829 | NA |
| ASV_16s_11895 | 0.249534803 | -0.267602526 | 3.550278944 | 1.35842694  | 0.986810717 | NA |
| ASV_16s_11896 | 0.250041232 | -0.268201481 | 3.550275947 | 1.359907659 | 0.98676773  | NA |
| ASV_16s_11897 | 0.25982574  | -0.279504708 | 3.550219794 | 1.386313907 | 0.985986773 | NA |
| ASV_16s_11898 | 0.247773707 | -0.289629716 | 3.55028406  | 1.342238009 | 0.987275147 | NA |
| ASV_16s_11899 | 0.244988345 | -0.286418048 | 3.550300956 | 1.33440594  | NA          | NA |
| ASV_16s_11900 | 0.265318445 | -0.320119785 | 3.550185874 | 1.380733518 | 0.986154082 | NA |
| ASV_16s_11901 | 0.244999753 | -0.311293131 | 3.550297495 | 1.318900398 | NA          | NA |
| ASV_16s_11902 | 0.24803833  | -0.314558291 | 3.550279508 | 1.326991206 | 0.987703282 | NA |
| ASV_16s_11903 | 0.250334375 | -0.354824534 | 3.550267831 | 1.29023244  | 0.988698821 | NA |
| ASV_16s_11904 | 0.264676749 | -0.36766294  | 3.550192217 | 1.323355896 | 0.987804041 | NA |
| ASV_16s_11905 | 0.245016865 | -0.349740218 | 3.550298205 | 1.277295322 | NA          | NA |
| ASV_16s_11906 | 0.245033977 | -0.390116183 | 3.550306709 | 1.225383515 | NA          | NA |
| ASV_16s_11907 | 0.306134653 | -0.68042403  | 3.550188832 | 0.831748944 | NA          | NA |
| ASV_16s_11908 | 0.290019972 | -0.680069882 | 3.550268784 | 0.814397177 | NA          | NA |
| ASV_16s_11909 | 0.245119538 | -0.668658183 | 3.550514066 | 0.759243935 | NA          | NA |
| ASV_16s_11910 | 0.078096652 | -0.169189519 | 3.550846562 | 0.38753422  | NA          | NA |
| ASV_16s_11911 | 0.076550026 | 0.024921926  | 3.550854738 | 0.597829991 | 0.999003622 | NA |
| ASV_16s_11912 | 0.071887079 | -0.071464653 | 3.550863265 | 0.508257918 | NA          | NA |
| ASV_16s_11913 | 0.108869432 | 0.220133685  | 3.550842249 | 0.494673412 | NA          | NA |
| ASV_16s_11914 | 0.108869432 | 0.220133685  | 3.550842249 | 0.494673412 | NA          | NA |
| ASV_16s_11915 | 0.344401093 | 0.688280949  | 3.550747409 | 1.124690401 | NA          | NA |
| ASV_16s_11916 | 0.27445817  | 0.561287384  | 3.551225695 | 0.901475834 | NA          | NA |
| ASV_16s_11917 | 0.265330833 | 0.142515851  | 3.5501937   | 1.398251986 | 0.985624744 | NA |
| ASV_16s_11918 | 0.262487677 | -0.009605042 | 3.550245328 | 1.181377716 | 0.99134937  | NA |
| ASV_16s_11919 | 0.260259287 | -0.29925037  | 3.549924957 | 0.948192734 | NA          | NA |
| ASV_16s_11920 | 0.321737662 | -0.773537753 | 3.549836016 | 1.135580316 | 0.992335316 | NA |
| ASV_16s_11921 | 0.316368309 | -0.761797031 | 3.549839237 | 1.174176876 | 0.991509366 | NA |
| ASV_16s_11922 | 0.278511899 | 0.202869322  | 3.549690622 | 1.50801394  | 0.98203092  | NA |
| ASV_16s_11923 | 0.232361236 | -0.406258292 | 3.551184047 | 0.837969781 | NA          | NA |



|               |             |              |             |             |             |    |
|---------------|-------------|--------------|-------------|-------------|-------------|----|
| ASV_16s_11924 | 0.278509069 | 0.246003324  | 3.549837032 | 1.521406227 | 0.98155931  | NA |
| ASV_16s_11925 | 0.321304489 | -0.439665822 | 3.549475904 | 1.192812713 | 0.991091443 | NA |
| ASV_16s_11926 | 0.255180502 | -0.712165734 | 3.550447323 | 0.921208775 | 0.996001428 | NA |
| ASV_16s_11927 | 0.314723727 | -0.697254139 | 3.549905601 | 1.307581221 | 0.988235394 | NA |
| ASV_16s_11928 | 0.314496552 | -0.745641505 | 3.549814663 | 1.084933372 | 0.993339677 | NA |
| ASV_16s_11929 | 0.313253826 | 0.678748843  | 3.549450206 | 0.807864421 | 0.997362864 | NA |
| ASV_16s_11930 | 0.269771275 | -0.110699626 | 3.550053797 | 1.147061848 | NA          | NA |
| ASV_16s_11931 | 0.342985883 | -0.744389934 | 3.550072652 | 1.141693232 | 0.99220803  | NA |
| ASV_16s_11932 | 0.312088236 | -0.620839198 | 3.550053547 | 1.334292546 | 0.987499377 | NA |
| ASV_16s_11933 | 0.260252954 | -0.472775954 | 3.550519242 | 1.256239276 | NA          | NA |
| ASV_16s_11934 | 0.261407499 | -0.618969701 | 3.550844838 | 0.823077799 | 0.997201242 | NA |
| ASV_16s_11935 | 0.327244385 | -0.588823599 | 3.550918718 | 0.862043579 | NA          | NA |
| ASV_16s_11936 | 0.305082782 | -0.560249532 | 3.550199899 | 1.329895081 | NA          | NA |
| ASV_16s_11937 | 0.318050988 | -0.548106553 | 3.550201686 | 1.336167237 | 0.98744669  | NA |
| ASV_16s_11938 | 0.326949587 | 0.625803816  | 3.550828112 | 0.668469907 | 0.998566444 | NA |
| ASV_16s_11939 | 0.26326028  | 0.350427129  | 3.551393392 | 0.726137957 | NA          | NA |
| ASV_16s_11940 | 0.311494296 | -0.339299154 | 3.550062322 | 1.191233253 | 0.991127351 | NA |
| ASV_16s_11941 | 0.315059164 | 0.182874565  | 3.549538626 | 1.329904092 | NA          | NA |
| ASV_16s_11942 | 0.313266242 | -1.191712972 | 3.549683479 | 0.733766528 | 0.998062625 | NA |
| ASV_16s_11943 | 0.399662213 | 0.576484909  | 3.549948782 | 1.621459877 | NA          | NA |
| ASV_16s_11944 | 0.318537742 | 0.273701857  | 3.550581023 | 1.313080401 | 0.988086103 | NA |
| ASV_16s_11945 | 0.350922061 | 0.323556042  | 3.550192614 | 1.61614444  | NA          | NA |
| ASV_16s_11946 | 0.313396628 | -0.399334182 | 3.55045213  | 1.275007516 | 0.989096108 | NA |
| ASV_16s_11947 | 0.143654867 | 0.661645615  | 3.551125307 | 0.450990001 | NA          | NA |
| ASV_16s_11948 | 0.251758563 | -0.1421092   | 3.550182115 | 0.856876742 | 0.996819257 | NA |
| ASV_16s_11949 | 0.222248397 | 0.286988555  | 3.551711621 | 0.406747971 | NA          | NA |
| ASV_16s_11950 | 0.31275764  | 0.179295938  | 3.551210645 | 0.659561142 | 0.998627524 | NA |
| ASV_16s_11951 | 0.297987524 | 1.226827876  | 3.550787522 | 0.981169872 | NA          | NA |
| ASV_16s_11952 | 0.418258421 | 0.05702754   | 3.549195059 | 0.96874068  | NA          | NA |
| ASV_16s_11953 | 0.335231124 | 1.642293588  | 3.549997921 | 0.883951295 | NA          | NA |
| ASV_16s_11954 | 0.321556547 | 0.400978742  | 3.550827077 | 0.830268473 | NA          | NA |
| ASV_16s_11955 | 0.299569419 | 1.302912516  | 3.550389343 | 0.924850087 | NA          | NA |
| ASV_16s_11956 | 0.390937568 | 0.403284534  | 3.550508338 | 0.893534519 | NA          | NA |
| ASV_16s_11957 | 0.205833963 | 0.375589236  | 3.551475371 | 0.681134286 | NA          | NA |
| ASV_16s_11958 | 0.23185977  | 0.351922355  | 3.551938984 | 0.413330501 | NA          | NA |
| ASV_16s_11959 | 0.278703778 | 0.393869963  | 3.551043769 | 0.782905851 | NA          | NA |
| ASV_16s_11960 | 0.34114095  | 0.384999931  | 3.551387904 | 0.525429997 | 0.999347937 | NA |
| ASV_16s_11961 | 0.314052372 | -0.839108329 | 3.549959762 | 0.896968775 | 0.996323893 | NA |
| ASV_16s_11962 | 0.269076362 | -0.563350574 | 3.550182736 | 0.768155263 | NA          | NA |
| ASV_16s_11963 | 0.208306145 | 1.24840083   | 3.550753762 | 0.592464584 | 0.999032579 | NA |
| ASV_16s_11964 | 0.088292708 | 0.344992899  | 3.551729739 | 0.353639648 | NA          | NA |
| ASV_16s_11965 | 0.088292708 | 0.344992899  | 3.551729739 | 0.353639648 | NA          | NA |
| ASV_16s_11966 | 0.088292708 | 0.344992899  | 3.551729739 | 0.353639648 | NA          | NA |
| ASV_16s_11967 | 0.088292708 | 0.344992899  | 3.551729739 | 0.353639648 | NA          | NA |
| ASV_16s_11968 | 0.142469098 | -0.497638192 | 3.550840557 | 0.49668089  | NA          | NA |
| ASV_16s_11969 | 0.125707551 | 1.098558559  | 3.551147715 | 0.424316362 | NA          | NA |
| ASV_16s_11970 | 0.242094466 | -0.078874255 | 3.550740312 | 1.03242598  | NA          | NA |
| ASV_16s_11971 | 0.18023096  | 0.220053947  | 3.550737253 | 0.725986738 | NA          | NA |
| ASV_16s_11972 | 0.18023096  | 0.220053947  | 3.550737253 | 0.725986738 | NA          | NA |
| ASV_16s_11973 | 0.189859093 | 0.596088765  | 3.550694663 | 0.684205658 | NA          | NA |
| ASV_16s_11974 | 0.250022759 | -0.068429594 | 3.550515014 | 1.328105343 | NA          | NA |
| ASV_16s_11975 | 0.26134261  | -0.069060244 | 3.550407931 | 1.398044934 | 0.985631071 | NA |
| ASV_16s_11976 | 0.252004833 | -0.068969013 | 3.550387981 | 1.38225266  | NA          | NA |
| ASV_16s_11977 | 0.339350988 | 1.66071925   | 3.55010208  | 1.084250732 | NA          | NA |
| ASV_16s_11978 | 0.253491388 | -0.068843894 | 3.550296734 | 1.413155184 | NA          | NA |
| ASV_16s_11979 | 0.266314349 | 0.064007828  | 3.550372625 | 1.448622633 | NA          | NA |
| ASV_16s_11980 | 0.293120191 | 1.787300513  | 3.550185231 | 0.818375412 | 0.997251873 | NA |
| ASV_16s_11981 | 0.201130877 | 0.688961075  | 3.550494434 | 0.826253808 | NA          | NA |
| ASV_16s_11982 | 0.351358799 | 0.449781485  | 3.551536112 | 0.823223148 | 0.997199667 | NA |
| ASV_16s_11983 | 0.276458463 | -0.068452463 | 3.550116853 | 1.482282636 | NA          | NA |
| ASV_16s_11984 | 0.311463601 | -0.720944903 | 3.549945816 | 0.765511818 | 0.997780194 | NA |
| ASV_16s_11985 | 0.272266036 | -0.068140553 | 3.550174868 | 1.437088449 | NA          | NA |
| ASV_16s_11986 | 0.384582229 | 1.484435975  | 3.550479199 | 0.810140788 | NA          | NA |
| ASV_16s_11987 | 0.299246567 | 1.336627052  | 3.550487403 | 1.007510456 | NA          | NA |
| ASV_16s_11988 | 0.285378795 | 0.31535651   | 3.550782983 | 0.823752739 | NA          | NA |
| ASV_16s_11989 | 0.203285148 | 0.751102097  | 3.551317045 | 0.966958275 | NA          | NA |
| ASV_16s_11990 | 0.22009338  | 1.00505654   | 3.551274542 | 0.828269983 | NA          | NA |

|               |             |              |             |             |             |    |
|---------------|-------------|--------------|-------------|-------------|-------------|----|
| ASV_16s_11991 | 0.274242729 | 0.111717744  | 3.550607264 | 1.246675873 | NA          | NA |
| ASV_16s_11992 | 0.307430025 | 1.347233447  | 3.550599901 | 0.925596954 | NA          | NA |
| ASV_16s_11993 | 0.204099731 | 0.279532906  | 3.551532718 | 0.696274655 | NA          | NA |
| ASV_16s_11994 | 0.078373064 | -0.282404763 | 3.551646585 | 0.384611953 | NA          | NA |
| ASV_16s_11995 | 0.321556547 | -0.548464334 | 3.549719334 | 0.754598841 | NA          | NA |
| ASV_16s_11996 | 0.321556547 | -0.548464334 | 3.549719334 | 0.754598841 | NA          | NA |
| ASV_16s_11997 | 0.222010582 | -0.117392761 | 3.550396661 | 1.188029563 | NA          | NA |
| ASV_16s_11998 | 0.253798153 | -0.117326961 | 3.55004007  | 1.366206453 | 0.986583917 | NA |
| ASV_16s_11999 | 0.277350699 | -0.084699824 | 3.550694177 | 1.022946607 | NA          | NA |
| ASV_16s_12000 | 0.361693305 | 0.34354693   | 3.54990758  | 1.691338832 | 0.974937623 | NA |
| ASV_16s_12001 | 0.395168632 | 0.720939849  | 3.54991082  | 1.571024538 | 0.979748436 | NA |
| ASV_16s_12002 | 0.268055931 | -0.029075464 | 3.550822367 | 1.14279092  | NA          | NA |
| ASV_16s_12003 | 0.268055931 | -0.029075464 | 3.550822367 | 1.14279092  | NA          | NA |
| ASV_16s_12004 | 0.276247915 | 0.343062111  | 3.550083907 | 1.469990455 | NA          | NA |
| ASV_16s_12005 | 0.306288015 | -0.074002479 | 3.55071046  | 1.175110926 | NA          | NA |
| ASV_16s_12006 | 0.374050526 | 0.343183477  | 3.549879227 | 1.674040451 | NA          | NA |
| ASV_16s_12007 | 0.321244513 | 0.356106639  | 3.550718226 | 0.892512198 | 0.996381274 | NA |
| ASV_16s_12008 | 0.271825566 | 0.360360561  | 3.550967564 | 1.13379367  | NA          | NA |
| ASV_16s_12009 | 0.271825566 | 0.360360561  | 3.550967564 | 1.13379367  | NA          | NA |
| ASV_16s_12010 | 0.271825566 | 0.360360561  | 3.550967564 | 1.13379367  | NA          | NA |
| ASV_16s_12011 | 0.264677237 | 0.383472952  | 3.550967274 | 1.307169049 | NA          | NA |
| ASV_16s_12012 | 0.315780764 | 0.315939521  | 3.550814671 | 1.17068647  | 0.991586248 | NA |
| ASV_16s_12013 | 0.343884398 | 0.315939383  | 3.55079615  | 1.213827915 | 0.99060502  | NA |
| ASV_16s_12014 | 0.294177252 | 0.315939539  | 3.550831308 | 1.13481464  | 0.992351166 | NA |
| ASV_16s_12015 | 0.283911384 | 0.315939549  | 3.5508401   | 1.116838281 | NA          | NA |
| ASV_16s_12016 | 0.283911384 | 0.466509614  | 3.550813589 | 1.791415157 | 0.97047843  | NA |
| ASV_16s_12017 | 0.392511767 | 1.166502287  | 3.550592438 | 0.98041351  | NA          | NA |
| ASV_16s_12018 | 0.318861773 | 0.802559559  | 3.550771164 | 1.029060239 | 0.994346034 | NA |
| ASV_16s_12019 | 0.375579873 | 0.734619703  | 3.55086229  | 1.23399621  | NA          | NA |
| ASV_16s_12020 | 0.375579873 | 0.734619703  | 3.55086229  | 1.23399621  | NA          | NA |
| ASV_16s_12021 | 0.375579873 | 0.734619703  | 3.55086229  | 1.23399621  | NA          | NA |
| ASV_16s_12022 | 0.376441383 | 1.181128549  | 3.550300208 | 0.914683577 | NA          | NA |
| ASV_16s_12023 | 0.354451566 | 0.693462914  | 3.550761626 | 1.163945826 | 0.991733483 | NA |
| ASV_16s_12024 | 0.325018005 | 0.693394941  | 3.550780521 | 1.120015532 | 0.992653476 | NA |
| ASV_16s_12025 | 0.283911384 | 0.693285314  | 3.55081343  | 1.051732583 | NA          | NA |
| ASV_16s_12026 | 0.378808611 | 0.69350901   | 3.550748211 | 1.197588942 | 0.990982306 | NA |
| ASV_16s_12027 | 0.158665335 | 0.884727993  | 3.551085926 | 0.543011357 | NA          | NA |
| ASV_16s_12028 | 0.240697673 | 0.276793428  | 3.551297639 | 0.73372988  | NA          | NA |
| ASV_16s_12029 | 0.240697673 | 0.276793428  | 3.551297639 | 0.73372988  | NA          | NA |
| ASV_16s_12030 | 0.24587605  | -0.097112572 | 3.550413586 | 1.310828962 | NA          | NA |
| ASV_16s_12031 | 0.246134969 | -0.109894921 | 3.550397687 | 1.323798811 | NA          | NA |
| ASV_16s_12032 | 0.246911725 | -0.147293078 | 3.550356745 | 1.351582634 | 0.987008307 | NA |
| ASV_16s_12033 | 0.251090954 | -0.154188844 | 3.550326365 | 1.363252092 | 0.986670324 | NA |
| ASV_16s_12034 | 0.247429563 | -0.171639805 | 3.550334467 | 1.36024485  | 0.986757929 | NA |
| ASV_16s_12035 | 0.240857387 | -0.18504815  | 3.550365118 | 1.339574871 | 0.987350575 | NA |
| ASV_16s_12036 | 0.240857387 | -0.18504815  | 3.550365118 | 1.339574871 | 0.987350575 | NA |
| ASV_16s_12037 | 0.243654157 | -0.212937092 | 3.550332008 | 1.350397395 | 0.987042339 | NA |
| ASV_16s_12038 | 0.244672721 | -0.22616209  | 3.550319932 | 1.352659364 | 0.986977343 | NA |
| ASV_16s_12039 | 0.240885907 | -0.244939511 | 3.550335921 | 1.335786548 | 0.9874574   | NA |
| ASV_16s_12040 | 0.240885907 | -0.244939511 | 3.550335921 | 1.335786548 | 0.9874574   | NA |
| ASV_16s_12041 | 0.24367127  | -0.248543983 | 3.550317944 | 1.344580534 | 0.987208572 | NA |
| ASV_16s_12042 | 0.2890642   | -0.309276869 | 3.550076521 | 1.462132938 | 0.983591737 | NA |
| ASV_16s_12043 | 0.262474059 | -0.29394918  | 3.550203179 | 1.388621443 | 0.985917232 | NA |
| ASV_16s_12044 | 0.240897315 | -0.269144963 | 3.550329711 | 1.328012004 | NA          | NA |
| ASV_16s_12045 | 0.260599764 | -0.303620887 | 3.550211531 | 1.376731946 | 0.986273306 | NA |
| ASV_16s_12046 | 0.256357196 | -0.311063592 | 3.550233377 | 1.358026496 | 0.986822328 | NA |
| ASV_16s_12047 | 0.244217628 | -0.335927861 | 3.550301906 | 1.290256452 | 0.988698188 | NA |
| ASV_16s_12048 | 0.258040394 | -0.387577607 | 3.550231776 | 1.273149415 | 0.989143995 | NA |
| ASV_16s_12049 | 0.24423474  | -0.375671776 | 3.550307603 | 1.242009864 | 0.989927246 | NA |
| ASV_16s_12050 | 0.08604652  | -0.361277206 | 3.551560335 | 0.420247114 | NA          | NA |
| ASV_16s_12051 | 0.328387498 | -0.680859839 | 3.550091319 | 0.854240595 | NA          | NA |
| ASV_16s_12052 | 0.314478131 | -0.680593435 | 3.550150725 | 0.84034898  | 0.997010043 | NA |
| ASV_16s_12053 | 0.313901187 | -0.680584503 | 3.5501533   | 0.839759414 | 0.997016706 | NA |
| ASV_16s_12054 | 0.3321802   | -0.680926913 | 3.550075977 | 0.857926939 | NA          | NA |
| ASV_16s_12055 | 0.076795041 | -0.169166747 | 3.550852304 | 0.381258419 | NA          | NA |
| ASV_16s_12056 | 0.107054941 | 0.220137105  | 3.550846741 | 0.487554877 | NA          | NA |
| ASV_16s_12057 | 0.107054941 | 0.220137105  | 3.550846741 | 0.487554877 | NA          | NA |

|               |             |              |             |             |             |    |
|---------------|-------------|--------------|-------------|-------------|-------------|----|
| ASV_16s_12058 | 0.107054941 | 0.220137105  | 3.550846741 | 0.487554877 | NA          | NA |
| ASV_16s_12060 | 0.25503188  | -0.021111025 | 3.550308661 | 1.339584809 | 0.987350294 | NA |
| ASV_16s_12061 | 0.254575416 | 0.047039022  | 3.549987372 | 1.304564852 | 0.988316792 | NA |
| ASV_16s_12062 | 0.245068048 | 0.205392633  | 3.550070004 | 1.176998622 | NA          | NA |
| ASV_16s_12063 | 0.253887002 | -0.170886525 | 3.550379532 | 0.777674798 | 0.99766517  | NA |
| ASV_16s_12064 | 0.30708973  | 0.784094904  | 3.551188325 | 0.93300236  | NA          | NA |
| ASV_16s_12065 | 0.249884881 | -0.448657772 | 3.550535548 | 1.174749119 | 0.991496719 | NA |
| ASV_16s_12066 | 0.285092029 | -0.014402595 | 3.549576024 | 1.399416364 | 0.985589134 | NA |
| ASV_16s_12067 | 0.248534736 | -0.280983301 | 3.54999085  | 0.96356532  | NA          | NA |
| ASV_16s_12068 | 0.294143536 | -0.694256675 | 3.55031915  | 0.872602432 | NA          | NA |
| ASV_16s_12069 | 0.31074     | -0.759024625 | 3.549873277 | 1.161162431 | 0.991793806 | NA |
| ASV_16s_12070 | 0.259189302 | 0.898114158  | 3.550045855 | 1.058004523 | 0.993837797 | NA |
| ASV_16s_12071 | 0.298977131 | -0.695387725 | 3.550175881 | 1.209972247 | 0.990695474 | NA |
| ASV_16s_12072 | 0.324931073 | -0.73527553  | 3.549815934 | 1.294068527 | 0.988597336 | NA |
| ASV_16s_12073 | 0.303919992 | -0.683022429 | 3.54996366  | 1.282934858 | NA          | NA |
| ASV_16s_12074 | 0.321759111 | -0.673887936 | 3.55046356  | 0.838769453 | 0.997027874 | NA |
| ASV_16s_12075 | 0.261997234 | 0.628904325  | 3.549929669 | 1.152218023 | 0.99198578  | NA |
| ASV_16s_12076 | 0.292918849 | 0.811635229  | 3.55005634  | 1.428288182 | 0.984689027 | NA |
| ASV_16s_12077 | 0.348562942 | -0.323439691 | 3.549617076 | 1.331913321 | 0.987566047 | NA |
| ASV_16s_12078 | 0.313988233 | -0.650843585 | 3.549992204 | 1.33277028  | 0.987542059 | NA |
| ASV_16s_12079 | 0.300841887 | -0.566950054 | 3.550232711 | 1.363196996 | NA          | NA |
| ASV_16s_12080 | 0.303709844 | -0.617254157 | 3.550075512 | 1.311637285 | 0.988125392 | NA |
| ASV_16s_12081 | 0.309296094 | -0.166761219 | 3.550421433 | 1.297625412 | NA          | NA |
| ASV_16s_12082 | 0.302005712 | -0.536559712 | 3.550247078 | 1.294842457 | 0.988576794 | NA |
| ASV_16s_12083 | 0.259631463 | 0.3514733    | 3.551356261 | 0.737988274 | NA          | NA |
| ASV_16s_12084 | 0.210129344 | -1.060223419 | 3.550319877 | 0.383059647 | NA          | NA |
| ASV_16s_12085 | 0.308769096 | -0.397514402 | 3.550492409 | 0.973461091 | 0.99524536  | NA |
| ASV_16s_12086 | 0.330230904 | 0.679357103  | 3.550824721 | 1.212640773 | NA          | NA |
| ASV_16s_12087 | 0.364978495 | -0.631056662 | 3.550115524 | 1.197864799 | NA          | NA |
| ASV_16s_12088 | 0.334111573 | 0.621995393  | 3.550804716 | 1.469952167 | 0.98333172  | NA |
| ASV_16s_12089 | 0.300461087 | -0.535290845 | 3.549990007 | 0.868162222 | NA          | NA |
| ASV_16s_12090 | 0.283159163 | -0.072954225 | 3.550406393 | 1.196718637 | 0.991002254 | NA |
| ASV_16s_12091 | 0.293155789 | -0.002493182 | 3.550740572 | 1.130621968 | 0.992437593 | NA |
| ASV_16s_12092 | 0.338235679 | 0.359134244  | 3.550427081 | 1.03461907  | 0.994250585 | NA |
| ASV_16s_12093 | 0.289235797 | 1.155782892  | 3.551137862 | 0.44152932  | 0.999633668 | NA |
| ASV_16s_12094 | 0.28429068  | 0.102017889  | 3.550776689 | 1.095329858 | 0.993140753 | NA |
| ASV_16s_12095 | 0.174680561 | 0.063367563  | 3.550715602 | 0.693772355 | 0.998383131 | NA |
| ASV_16s_12096 | 0.276712678 | 0.001863789  | 3.549822484 | 0.816290439 | 0.997274128 | NA |
| ASV_16s_12097 | 0.266848481 | 1.286962031  | 3.550717375 | 0.739534007 | NA          | NA |
| ASV_16s_12098 | 0.300264703 | 1.307824811  | 3.550581774 | 0.780043559 | NA          | NA |
| ASV_16s_12099 | 0.296905757 | 1.306172379  | 3.550594851 | 0.776253401 | NA          | NA |
| ASV_16s_12100 | 0.201459191 | 1.575413766  | 3.550774679 | 0.388445501 | 0.999761185 | NA |
| ASV_16s_12101 | 0.260403418 | 0.941618827  | 3.550132842 | 1.086250407 | NA          | NA |
| ASV_16s_12102 | 0.277016153 | -0.025682823 | 3.549724024 | 1.183272314 | NA          | NA |
| ASV_16s_12103 | 0.300161577 | 1.364564487  | 3.550377208 | 0.797473715 | NA          | NA |
| ASV_16s_12104 | 0.291405244 | -0.07633298  | 3.551000367 | 0.870631452 | NA          | NA |
| ASV_16s_12105 | 0.338661075 | -0.564571173 | 3.54987697  | 0.841719042 | NA          | NA |
| ASV_16s_12106 | 0.17316255  | -0.933121361 | 3.550808988 | 0.332883956 | NA          | NA |
| ASV_16s_12107 | 0.297370337 | -0.563915711 | 3.550041375 | 0.800044872 | NA          | NA |
| ASV_16s_12108 | 0.320110562 | -0.476645593 | 3.550300286 | 0.931904593 | NA          | NA |
| ASV_16s_12109 | 0.258180905 | 1.295610823  | 3.550563215 | 0.6665477   | 0.998579773 | NA |
| ASV_16s_12110 | 0.230459404 | 0.40571725   | 3.550960201 | 0.652206098 | NA          | NA |
| ASV_16s_12111 | 0.086821163 | 0.344730632  | 3.551734664 | 0.349157471 | NA          | NA |
| ASV_16s_12112 | 0.140094613 | -0.494317118 | 3.550865316 | 0.491456764 | NA          | NA |
| ASV_16s_12113 | 0.155931203 | -0.514592759 | 3.550711024 | 0.524863963 | NA          | NA |
| ASV_16s_12114 | 0.155931203 | -0.514592759 | 3.550711024 | 0.524863963 | NA          | NA |
| ASV_16s_12115 | 0.240924789 | 1.363072505  | 3.549896031 | 0.509934068 | NA          | NA |
| ASV_16s_12116 | 0.123612425 | 1.092990912  | 3.551160195 | 0.419093198 | NA          | NA |
| ASV_16s_12117 | 0.123612425 | 1.092990912  | 3.551160195 | 0.419093198 | NA          | NA |
| ASV_16s_12118 | 0.279179527 | -0.078975924 | 3.550710377 | 1.104055423 | NA          | NA |
| ASV_16s_12119 | 0.171313887 | 0.220060236  | 3.550745609 | 0.701340629 | 0.998325415 | NA |
| ASV_16s_12120 | 0.284951345 | 0.310935848  | 3.550817742 | 1.095823454 | NA          | NA |
| ASV_16s_12121 | 0.186694775 | 0.596082562  | 3.550697114 | 0.676094729 | NA          | NA |
| ASV_16s_12122 | 0.270536272 | 0.688115494  | 3.550799925 | 1.002753645 | NA          | NA |
| ASV_16s_12123 | 0.181229303 | 0.217806749  | 3.5507647   | 0.574968955 | 0.999123057 | NA |
| ASV_16s_12124 | 0.302604244 | -0.575496675 | 3.550380742 | 0.812335377 | NA          | NA |
| ASV_16s_12125 | 0.251934072 | -0.068643363 | 3.550218653 | 1.419934568 | NA          | NA |

|               |             |              |             |             |             |    |
|---------------|-------------|--------------|-------------|-------------|-------------|----|
| ASV_16s_12126 | 0.31502951  | 0.372392394  | 3.551694645 | 0.690993572 | NA          | NA |
| ASV_16s_12127 | 0.254907182 | -0.068333443 | 3.550201632 | 1.416304313 | NA          | NA |
| ASV_16s_12128 | 0.263077734 | -0.068030741 | 3.550219077 | 1.407869362 | 0.985329014 | NA |
| ASV_16s_12129 | 0.327045965 | 1.200861329  | 3.550331486 | 0.799696327 | NA          | NA |
| ASV_16s_12130 | 0.249704784 | 0.301100624  | 3.550496188 | 1.247852783 | NA          | NA |
| ASV_16s_12131 | 0.072846217 | -0.264283841 | 3.551671668 | 0.365436078 | NA          | NA |
| ASV_16s_12132 | 0.072846217 | -0.264283841 | 3.551671668 | 0.365436078 | NA          | NA |
| ASV_16s_12133 | 0.513743786 | 1.299214906  | 3.549919501 | 1.394676428 | NA          | NA |
| ASV_16s_12134 | 0.289457727 | 0.31945913   | 3.550895011 | 0.900185141 | NA          | NA |
| ASV_16s_12135 | 0.33099699  | 1.220657467  | 3.549990601 | 1.294426377 | 0.988587841 | NA |
| ASV_16s_12136 | 0.233426761 | -0.1170655   | 3.55010578  | 1.316534399 | NA          | NA |
| ASV_16s_12137 | 0.479176165 | 0.278810143  | 3.550714749 | 2.473286935 | 0.929095116 | NA |
| ASV_16s_12138 | 0.440837404 | 0.698894567  | 3.550513662 | 2.031131461 | 0.958097218 | NA |
| ASV_16s_12139 | 0.317576627 | 0.348839339  | 3.55007136  | 1.523209538 | NA          | NA |
| ASV_16s_12140 | 0.263588332 | -0.029060192 | 3.550827489 | 1.134302096 | NA          | NA |
| ASV_16s_12141 | 0.35084238  | 0.344900069  | 3.550051692 | 1.533734603 | NA          | NA |
| ASV_16s_12142 | 0.309558925 | 0.343777095  | 3.550098994 | 1.493353314 | NA          | NA |
| ASV_16s_12143 | 0.312157242 | 0.345042957  | 3.55011402  | 1.489857844 | NA          | NA |
| ASV_16s_12144 | 0.352152131 | 0.373666038  | 3.550431911 | 1.383974283 | NA          | NA |
| ASV_16s_12145 | 0.286832641 | 0.350045709  | 3.550853635 | 0.852626074 | NA          | NA |
| ASV_16s_12146 | 0.292129864 | 0.340434248  | 3.55088899  | 0.89410703  | 0.996360807 | NA |
| ASV_16s_12147 | 0.26729514  | 0.36035864   | 3.550973877 | 1.125267541 | NA          | NA |
| ASV_16s_12148 | 0.307634331 | 0.315939422  | 3.550820676 | 1.157417465 | 0.991874531 | NA |
| ASV_16s_12149 | 0.299666986 | 0.315939427  | 3.55082686  | 1.144130411 | 0.992156914 | NA |
| ASV_16s_12150 | 0.297970767 | 0.315939428  | 3.550828219 | 1.141261567 | 0.992217062 | NA |
| ASV_16s_12151 | 0.29410239  | 0.315939431  | 3.550831376 | 1.134648181 | 0.992354609 | NA |
| ASV_16s_12152 | 0.322743988 | 0.315939414  | 3.550809795 | 1.181639594 | 0.991343516 | NA |
| ASV_16s_12153 | 0.279179527 | 0.315939566  | 3.550844375 | 1.108305937 | NA          | NA |
| ASV_16s_12154 | 0.265873003 | 0.688101991  | 3.550804215 | 0.994017524 | NA          | NA |
| ASV_16s_12155 | 0.265873003 | 0.688101991  | 3.550804215 | 0.994017524 | NA          | NA |
| ASV_16s_12156 | 0.379560816 | 1.081290014  | 3.550504803 | 0.964644562 | 0.995378885 | NA |
| ASV_16s_12157 | 0.369320209 | 0.734603064  | 3.550867138 | 1.225444494 | NA          | NA |
| ASV_16s_12158 | 0.369320209 | 0.734603064  | 3.550867138 | 1.225444494 | NA          | NA |
| ASV_16s_12159 | 0.360417821 | 1.070591364  | 3.550546309 | 0.946186861 | 0.995650542 | NA |
| ASV_16s_12160 | 0.182944857 | 0.733588908  | 3.551161555 | 0.874897736 | NA          | NA |
| ASV_16s_12161 | 0.347476238 | 0.693448683  | 3.550765819 | 1.153845772 | 0.991951056 | NA |
| ASV_16s_12162 | 0.331492432 | 0.693410927  | 3.550776082 | 1.129978714 | 0.992450798 | NA |
| ASV_16s_12163 | 0.353090452 | 0.693460303  | 3.550762435 | 1.161967178 | NA          | NA |
| ASV_16s_12164 | 0.311750443 | 0.69336505   | 3.550790205 | 1.098898338 | 0.993071618 | NA |
| ASV_16s_12165 | 0.302981351 | 0.693341548  | 3.550797065 | 1.084478985 | 0.993348286 | NA |
| ASV_16s_12166 | 0.40938735  | 0.693559389  | 3.550733614 | 1.236969665 | NA          | NA |
| ASV_16s_12167 | 0.23671502  | -0.051529855 | 3.550534116 | 1.236393843 | NA          | NA |
| ASV_16s_12168 | 0.236732133 | -0.091245793 | 3.550480027 | 1.280869617 | NA          | NA |
| ASV_16s_12169 | 0.241312815 | -0.149734476 | 3.550389149 | 1.332887751 | 0.987538768 | NA |
| ASV_16s_12170 | 0.253165163 | -0.168955984 | 3.550303292 | 1.372505757 | 0.986398542 | NA |
| ASV_16s_12171 | 0.236766357 | -0.166390093 | 3.550404522 | 1.321575035 | 0.987853216 | NA |
| ASV_16s_12172 | 0.253683001 | -0.19248718  | 3.550284952 | 1.380042339 | 0.98617472  | NA |
| ASV_16s_12173 | 0.259045266 | -0.211135201 | 3.55024574  | 1.396557185 | 0.985676481 | NA |
| ASV_16s_12174 | 0.24360886  | -0.18923232  | 3.550345605 | 1.349618003 | 0.987064689 | NA |
| ASV_16s_12175 | 0.243867779 | -0.201409901 | 3.550336805 | 1.351284882 | 0.987016862 | NA |
| ASV_16s_12176 | 0.24159455  | -0.209978274 | 3.550346079 | 1.34321226  | 0.987247484 | NA |
| ASV_16s_12177 | 0.263388428 | -0.238810798 | 3.550211776 | 1.412702293 | 0.985179025 | NA |
| ASV_16s_12178 | 0.240339884 | -0.232166718 | 3.550343863 | 1.336457846 | 0.987438511 | NA |
| ASV_16s_12179 | 0.2568893   | -0.276150677 | 3.550236364 | 1.379255939 | 0.986198179 | NA |
| ASV_16s_12180 | 0.241369855 | -0.269706581 | 3.550326798 | 1.329352929 | 0.987637551 | NA |
| ASV_16s_12181 | 0.239349841 | -0.279673825 | 3.550336658 | 1.318029625 | 0.987950752 | NA |
| ASV_16s_12182 | 0.236829102 | -0.302114234 | 3.550348497 | 1.296362714 | NA          | NA |
| ASV_16s_12183 | 0.251953388 | -0.331016635 | 3.550257052 | 1.323801368 | 0.987791722 | NA |
| ASV_16s_12184 | 0.23684051  | -0.328214158 | 3.550347134 | 1.270992193 | NA          | NA |
| ASV_16s_12185 | 0.241910509 | -0.346659674 | 3.55031673  | 1.269449333 | 0.989238966 | NA |
| ASV_16s_12186 | 0.238382615 | -0.384232201 | 3.55034618  | 1.209937692 | NA          | NA |
| ASV_16s_12187 | 0.357717039 | -0.681351002 | 3.549981137 | 0.88168421  | NA          | NA |
| ASV_16s_12188 | 0.310766823 | -0.680518508 | 3.550167531 | 0.83651686  | 0.997053181 | NA |
| ASV_16s_12189 | 0.308912241 | -0.680480632 | 3.550176044 | 0.834596768 | 0.997074642 | NA |
| ASV_16s_12190 | 0.307057659 | -0.680442308 | 3.550184657 | 0.832665343 | 0.997096126 | NA |
| ASV_16s_12191 | 0.332921056 | -0.680939733 | 3.550073087 | 0.858618808 | NA          | NA |
| ASV_16s_12192 | 0.304859001 | -0.680396263 | 3.550195006 | 0.830359379 | NA          | NA |

|               |             |              |             |             |             |    |
|---------------|-------------|--------------|-------------|-------------|-------------|----|
| ASV_16s_12193 | 0.251635344 | -0.672267559 | 3.550480482 | 0.767983876 | NA          | NA |
| ASV_16s_12194 | 0.242772827 | -0.667254466 | 3.55052646  | 0.75597415  | NA          | NA |
| ASV_16s_12195 | 0.236948887 | -0.663741764 | 3.550557848 | 0.74784944  | NA          | NA |
| ASV_16s_12196 | 0.153374926 | 0.220075311  | 3.550765348 | 0.648484282 | NA          | NA |
| ASV_16s_12198 | 0.245444938 | -0.030176794 | 3.550206874 | 1.141464299 | 0.992212821 | NA |
| ASV_16s_12199 | 0.244694937 | 0.705363213  | 3.551336134 | 0.74007936  | NA          | NA |
| ASV_16s_12200 | 0.259759385 | 0.14546221   | 3.550268514 | 1.217554308 | 0.990517081 | NA |
| ASV_16s_12201 | 0.305407423 | 1.286573544  | 3.550189956 | 0.504720765 | 0.999429012 | NA |
| ASV_16s_12202 | 0.256716033 | 0.178911055  | 3.549920997 | 1.400363001 | 0.985560144 | NA |
| ASV_16s_12203 | 0.253093599 | 0.696304193  | 3.551059132 | 0.935424197 | NA          | NA |
| ASV_16s_12204 | 0.245846308 | 0.283492552  | 3.550148311 | 1.36779629  | 0.986537277 | NA |
| ASV_16s_12205 | 0.316338933 | -1.255568596 | 3.550006872 | 0.561007499 | 0.999191022 | NA |
| ASV_16s_12206 | 0.303115359 | -0.760827709 | 3.549935781 | 1.115975159 | 0.992734679 | NA |
| ASV_16s_12207 | 0.258525492 | -0.24563217  | 3.550622613 | 1.045423651 | 0.994062134 | NA |
| ASV_16s_12208 | 0.295565784 | -0.762639024 | 3.550245265 | 0.936971556 | 0.99578222  | NA |
| ASV_16s_12209 | 0.298500825 | -0.743960338 | 3.549933312 | 1.154163502 | 0.991944267 | NA |
| ASV_16s_12210 | 0.30721369  | -0.750730697 | 3.54988663  | 1.175197207 | 0.991486809 | NA |
| ASV_16s_12211 | 0.331081513 | -0.76548287  | 3.549755184 | 1.229787129 | 0.990224806 | NA |
| ASV_16s_12212 | 0.281593245 | -0.683332422 | 3.550621295 | 0.858429901 | NA          | NA |
| ASV_16s_12213 | 0.308484796 | -0.709313372 | 3.549903968 | 1.267454285 | 0.98928996  | NA |
| ASV_16s_12214 | 0.31542949  | -0.239373148 | 3.549421643 | 0.940815904 | 0.995727606 | NA |
| ASV_16s_12215 | 0.305661371 | -0.694636917 | 3.549936116 | 1.275335023 | NA          | NA |
| ASV_16s_12216 | 0.299650889 | -0.681928157 | 3.54997816  | 1.270435881 | 0.989213694 | NA |
| ASV_16s_12217 | 0.269605113 | -0.08573806  | 3.549923267 | 1.029764847 | 0.994333992 | NA |
| ASV_16s_12218 | 0.282871053 | 0.210671229  | 3.550227011 | 1.437239273 | 0.98440326  | NA |
| ASV_16s_12219 | 0.31986555  | 0.110559136  | 3.549596762 | 1.088226326 | 0.993277071 | NA |
| ASV_16s_12220 | 0.28873839  | -0.556563221 | 3.550227786 | 1.269600599 | 0.989235093 | NA |
| ASV_16s_12221 | 0.297884591 | 0.81566644   | 3.55000853  | 0.652306278 | NA          | NA |
| ASV_16s_12222 | 0.306043066 | -0.128855159 | 3.549887029 | 1.325207605 | NA          | NA |
| ASV_16s_12223 | 0.267994267 | -0.381568066 | 3.549494506 | 0.835941681 | 0.997059621 | NA |
| ASV_16s_12224 | 0.289655813 | -0.894475611 | 3.550328906 | 0.762153807 | NA          | NA |
| ASV_16s_12225 | 0.212879713 | -0.710632388 | 3.550712561 | 0.400555745 | NA          | NA |
| ASV_16s_12226 | 0.398790325 | 0.236472233  | 3.549779722 | 1.739185724 | 0.972857748 | NA |
| ASV_16s_12227 | 0.299306507 | -0.299274353 | 3.550660944 | 0.965390121 | 0.995367688 | NA |
| ASV_16s_12228 | 0.31578105  | 0.237630547  | 3.549198787 | 1.152856142 | NA          | NA |
| ASV_16s_12229 | 0.29768573  | -0.14121317  | 3.550224226 | 1.095279259 | NA          | NA |
| ASV_16s_12230 | 0.198848781 | 0.605986788  | 3.550519176 | 0.837334091 | NA          | NA |
| ASV_16s_12231 | 0.276073705 | 0.310383498  | 3.550946367 | 0.847554255 | 0.996927818 | NA |
| ASV_16s_12232 | 0.249721465 | -0.292167265 | 3.550714081 | 0.856066797 | 0.996828787 | NA |
| ASV_16s_12233 | 0.23014579  | -0.346748837 | 3.550165833 | 1.137775366 | NA          | NA |
| ASV_16s_12234 | 0.237547025 | 1.098769402  | 3.551178934 | 0.827904105 | NA          | NA |
| ASV_16s_12235 | 0.304674105 | 1.734380476  | 3.550369573 | 0.48230905  | NA          | NA |
| ASV_16s_12236 | 0.295101285 | 1.39146404   | 3.55036111  | 0.967007141 | 0.995343344 | NA |
| ASV_16s_12237 | 0.281988996 | 0.756090101  | 3.550980729 | 0.709770668 | NA          | NA |
| ASV_16s_12238 | 0.35314057  | 1.827786532  | 3.549945034 | 0.682360063 | 0.998467633 | NA |
| ASV_16s_12239 | 0.277004332 | 1.063153234  | 3.550370817 | 1.010763277 | NA          | NA |
| ASV_16s_12240 | 0.333605765 | -0.564499948 | 3.549895143 | 0.83681107  | NA          | NA |
| ASV_16s_12241 | 0.22993443  | 0.095939164  | 3.550258899 | 0.692810057 | NA          | NA |
| ASV_16s_12242 | 0.35839201  | 1.328157046  | 3.550369188 | 0.839119587 | NA          | NA |
| ASV_16s_12243 | 0.181578114 | 1.212005297  | 3.550867327 | 0.543565598 | NA          | NA |
| ASV_16s_12244 | 0.302867462 | 0.418797644  | 3.550577881 | 0.742212536 | NA          | NA |
| ASV_16s_12245 | 0.333634623 | 0.028216318  | 3.549742456 | 1.500758471 | 0.98228339  | NA |
| ASV_16s_12246 | 0.203680473 | 0.24229224   | 3.550807317 | 0.371281079 | 0.99979477  | NA |
| ASV_16s_12247 | 0.29040123  | 0.451800802  | 3.549915136 | 1.603612788 | 0.978504318 | NA |
| ASV_16s_12248 | 0.226553313 | 0.404205301  | 3.550980344 | 0.646449824 | NA          | NA |
| ASV_16s_12249 | 0.435791808 | -0.549571307 | 3.549450029 | 0.852101188 | NA          | NA |
| ASV_16s_12250 | 0.167257937 | -0.526506945 | 3.550612605 | 0.547108792 | NA          | NA |
| ASV_16s_12251 | 0.153288301 | -0.511371151 | 3.550734979 | 0.519441447 | NA          | NA |
| ASV_16s_12252 | 0.153288301 | -0.511371151 | 3.550734979 | 0.519441447 | NA          | NA |
| ASV_16s_12253 | 0.234024651 | -0.078848313 | 3.55074809  | 1.015394336 | NA          | NA |
| ASV_16s_12254 | 0.234024651 | -0.078848313 | 3.55074809  | 1.015394336 | NA          | NA |
| ASV_16s_12255 | 0.242822862 | -0.078874648 | 3.550739647 | 1.033867051 | 0.994263557 | NA |
| ASV_16s_12256 | 0.277698925 | 0.195604646  | 3.550764329 | 1.721117805 | NA          | NA |
| ASV_16s_12257 | 0.166926208 | 0.220063482  | 3.550750049 | 0.688802232 | 0.998420303 | NA |
| ASV_16s_12258 | 0.169789843 | 0.220061391  | 3.550747128 | 0.696995974 | 0.998358712 | NA |
| ASV_16s_12259 | 0.26603941  | -0.057638827 | 3.550703726 | 1.058163288 | NA          | NA |
| ASV_16s_12260 | 0.369728913 | 0.001335153  | 3.536353984 | 0.556909996 | 0.999210271 | NA |

|               |             |              |             |              |             |    |
|---------------|-------------|--------------|-------------|--------------|-------------|----|
| ASV_16s_12261 | 0.170723139 | 0.571734594  | 3.550685698 | 0.677804945  | NA          | NA |
| ASV_16s_12262 | 0.297406664 | -0.24778542  | 3.549983543 | 1.450488312  | 0.983974427 | NA |
| ASV_16s_12263 | 0.2488902   | -0.068504209 | 3.550219423 | 1.406109339  | NA          | NA |
| ASV_16s_12264 | 0.293679752 | 1.318253128  | 3.549918557 | 0.957895318  | NA          | NA |
| ASV_16s_12265 | 0.259219014 | -0.068590339 | 3.550175521 | 1.443022161  | 0.984216945 | NA |
| ASV_16s_12266 | 0.252358829 | -0.067983366 | 3.550257795 | 1.385699252  | NA          | NA |
| ASV_16s_12267 | 0.316773797 | 1.201452503  | 3.550466696 | 0.941850485  | 0.995712831 | NA |
| ASV_16s_12268 | 0.332618408 | 0.700884988  | 3.550860126 | 1.241022959  | 0.989951478 | NA |
| ASV_16s_12269 | 0.255442086 | -0.099577661 | 3.549959446 | 1.095329457  | NA          | NA |
| ASV_16s_12270 | 0.270471532 | 0.834755397  | 3.550833795 | 1.178489076  | NA          | NA |
| ASV_16s_12271 | 0.117161239 | 0.282970391  | 3.5517026   | 0.502768909  | NA          | NA |
| ASV_16s_12272 | 0.117161239 | 0.282970391  | 3.5517026   | 0.502768909  | NA          | NA |
| ASV_16s_12273 | 0.117161239 | 0.282970391  | 3.5517026   | 0.502768909  | NA          | NA |
| ASV_16s_12274 | 0.418802257 | 0.302228191  | 3.550854897 | 0.94910579   | NA          | NA |
| ASV_16s_12275 | 0.164288043 | 0.279604152  | 3.551618778 | 0.618359828  | NA          | NA |
| ASV_16s_12276 | 0.164288043 | 0.279604152  | 3.551618778 | 0.618359828  | NA          | NA |
| ASV_16s_12277 | 0.534541651 | -0.566316187 | 3.549440945 | 0.988424109  | NA          | NA |
| ASV_16s_12278 | 0.304563801 | -0.629630976 | 3.549640207 | 0.909796031  | NA          | NA |
| ASV_16s_12279 | 0.358399057 | 0.03457294   | 3.550242623 | 1.05172323   | NA          | NA |
| ASV_16s_12280 | 0.28414458  | 0.082623359  | 3.550827894 | 0.797075082  | NA          | NA |
| ASV_16s_12281 | 0.35090506  | 0.227756948  | 3.5506047   | 1.6764051    | NA          | NA |
| ASV_16s_12282 | 0.354100216 | 0.660878676  | 3.550854554 | 1.47804478   | NA          | NA |
| ASV_16s_12283 | 0.259120733 | -0.029044365 | 3.550832788 | 1.125671858  | NA          | NA |
| ASV_16s_12284 | 0.216243715 | -0.073712667 | 3.550792161 | 1.000250486  | NA          | NA |
| ASV_16s_12285 | 0.215305826 | -0.073708383 | 3.55079337  | 0.998093948  | 0.994859225 | NA |
| ASV_16s_12286 | 0.262764713 | 0.360356651  | 3.550980406 | 1.116597425  | NA          | NA |
| ASV_16s_12287 | 0.308147014 | 0.315939443  | 3.550820294 | 1.158233977  | 0.991856973 | NA |
| ASV_16s_12288 | 0.296192307 | 0.315939451  | 3.550829667 | 1.138195897  | 0.992281014 | NA |
| ASV_16s_12289 | 0.347559598 | 0.315939422  | 3.550793958 | 1.219156007  | 0.990479126 | NA |
| ASV_16s_12290 | 0.281291583 | 0.315939462  | 3.550842456 | 1.112085834  | 0.992812309 | NA |
| ASV_16s_12291 | 0.321842118 | 0.315939435  | 3.550810423 | 1.180187269  | 0.991375949 | NA |
| ASV_16s_12292 | 0.280949388 | 0.315939463  | 3.550842766 | 1.111470134  | 0.992824549 | NA |
| ASV_16s_12293 | 0.312063138 | 0.315939441  | 3.550817391 | 1.164566052  | 0.991720004 | NA |
| ASV_16s_12294 | 0.382299153 | 1.115806085  | 3.550434578 | 0.950111069  | 0.995593673 | NA |
| ASV_16s_12295 | 0.363060544 | 0.734585837  | 3.550872151 | 1.216747964  | NA          | NA |
| ASV_16s_12296 | 0.311426193 | 0.693364355  | 3.550790456 | 1.098348412  | 0.993082301 | NA |
| ASV_16s_12297 | 0.343142894 | 0.693439598  | 3.550768512 | 1.14745764   | 0.992086791 | NA |
| ASV_16s_12298 | 0.344133638 | 0.693441727  | 3.550767891 | 1.148918256  | 0.992055883 | NA |
| ASV_16s_12299 | 0.321749666 | 0.693388254  | 3.550782841 | 1.114844089  | 0.992757309 | NA |
| ASV_16s_12300 | 0.323002393 | 0.693391321  | 3.55078195  | 1.116811467  | 0.992717918 | NA |
| ASV_16s_12301 | 0.325838096 | 0.693398175  | 3.550779958 | 1.121237055  | 0.992628814 | NA |
| ASV_16s_12302 | 0.315816276 | 0.693373404  | 3.550787157 | 1.1054424291 | 0.992944049 | NA |
| ASV_16s_12303 | 0.314534952 | 0.693372388  | 3.550788112 | 1.1033652    | 0.992984459 | NA |
| ASV_16s_12304 | 0.421484164 | 1.687272669  | 3.549962772 | 0.682292934  | NA          | NA |
| ASV_16s_12305 | 0.23253843  | 0.278219454  | 3.551348068 | 0.722133433  | NA          | NA |
| ASV_16s_12306 | 0.23253843  | 0.278219454  | 3.551348068 | 0.722133433  | NA          | NA |
| ASV_16s_12307 | 0.23253843  | 0.278219454  | 3.551348068 | 0.722133433  | NA          | NA |
| ASV_16s_12308 | 0.23253843  | 0.278219454  | 3.551348068 | 0.722133433  | NA          | NA |
| ASV_16s_12309 | 0.257347251 | -0.094928263 | 3.550347878 | 1.322672307  | NA          | NA |
| ASV_16s_12310 | 0.236681131 | -0.051414595 | 3.550534629 | 1.227439536  | NA          | NA |
| ASV_16s_12311 | 0.232641103 | -0.069147188 | 3.550537452 | 1.241464432  | NA          | NA |
| ASV_16s_12312 | 0.237716807 | -0.106007065 | 3.550456045 | 1.288127634  | NA          | NA |
| ASV_16s_12313 | 0.237716807 | -0.106007065 | 3.550456045 | 1.288127634  | NA          | NA |
| ASV_16s_12314 | 0.237975725 | -0.119106446 | 3.550439982 | 1.300437309  | NA          | NA |
| ASV_16s_12315 | 0.238234644 | -0.132038856 | 3.550425159 | 1.311932961  | NA          | NA |
| ASV_16s_12316 | 0.238493563 | -0.144827265 | 3.550411499 | 1.321194279  | 0.987863714 | NA |
| ASV_16s_12317 | 0.238493563 | -0.144827265 | 3.550411499 | 1.321194279  | 0.987863714 | NA |
| ASV_16s_12318 | 0.232675327 | -0.146934213 | 3.550448021 | 1.301301615  | 0.98840446  | NA |
| ASV_16s_12319 | 0.239011401 | -0.170057013 | 3.550387418 | 1.330239896  | 0.987612809 | NA |
| ASV_16s_12320 | 0.239529238 | -0.194955068 | 3.550367318 | 1.335613278  | 0.987462273 | NA |
| ASV_16s_12321 | 0.232698144 | -0.196684875 | 3.550410296 | 1.311267836  | 0.988135438 | NA |
| ASV_16s_12322 | 0.239788157 | -0.207339063 | 3.550358687 | 1.336819533  | 0.987428326 | NA |
| ASV_16s_12323 | 0.239788157 | -0.207339063 | 3.550358687 | 1.336819533  | 0.987428326 | NA |
| ASV_16s_12324 | 0.239788157 | -0.207339063 | 3.550358687 | 1.336819533  | 0.987428326 | NA |
| ASV_16s_12325 | 0.232726664 | -0.258811147 | 3.550383825 | 1.302731839  | 0.988366087 | NA |
| ASV_16s_12326 | 0.236018456 | -0.263041138 | 3.550361567 | 1.313013797  | 0.988087918 | NA |
| ASV_16s_12327 | 0.267717195 | -0.31084339  | 3.550174714 | 1.394200438  | 0.985748237 | NA |

|               |             |              |             |             |             |    |
|---------------|-------------|--------------|-------------|-------------|-------------|----|
| ASV_16s_12328 | 0.24134167  | -0.282063377 | 3.550323962 | 1.323759022 | NA          | NA |
| ASV_16s_12329 | 0.232743776 | -0.297309402 | 3.550375471 | 1.284707142 | NA          | NA |
| ASV_16s_12330 | 0.236305895 | -0.340954701 | 3.550351249 | 1.255091672 | 0.989602619 | NA |
| ASV_16s_12331 | 0.238343021 | -0.370214093 | 3.550342849 | 1.227886783 | 0.990270572 | NA |
| ASV_16s_12332 | 0.232789409 | -0.408427408 | 3.550391493 | 1.157188087 | NA          | NA |
| ASV_16s_12333 | 0.267675813 | -0.448929087 | 3.550205353 | 1.206234642 | 0.990782637 | NA |
| ASV_16s_12334 | 0.270535013 | -0.450755752 | 3.55019168  | 1.211502277 | 0.990659644 | NA |
| ASV_16s_12335 | 0.234342922 | -0.509873166 | 3.550443144 | 1.006473868 | NA          | NA |
| ASV_16s_12336 | 0.247689    | -0.517346133 | 3.550360478 | 1.030479678 | 0.994321758 | NA |
| ASV_16s_12337 | 0.083129689 | -0.349524369 | 3.551582574 | 0.410561455 | NA          | NA |
| ASV_16s_12338 | 0.083129689 | -0.349524369 | 3.551582574 | 0.410561455 | NA          | NA |
| ASV_16s_12339 | 0.083129689 | -0.349524369 | 3.551582574 | 0.410561455 | NA          | NA |
| ASV_16s_12340 | 0.303346351 | -0.680363773 | 3.550202282 | 0.828740768 | 0.997139461 | NA |
| ASV_16s_12341 | 0.307410044 | -0.680449144 | 3.550183094 | 0.833006468 | 0.997092339 | NA |
| ASV_16s_12342 | 0.261581437 | -0.676293024 | 3.550426708 | 0.780817683 | 0.997634822 | NA |
| ASV_16s_12343 | 0.282121422 | -0.679846312 | 3.550311453 | 0.805473172 | 0.997387696 | NA |
| ASV_16s_12344 | 0.247296804 | -0.669915421 | 3.550503058 | 0.762135993 | NA          | NA |
| ASV_16s_12345 | 0.239193931 | -0.66509755  | 3.550545656 | 0.750977995 | 0.997912654 | NA |
| ASV_16s_12346 | 0.232863561 | -0.661218619 | 3.550580772 | 0.74201594  | NA          | NA |
| ASV_16s_12347 | 0.07419182  | -0.169118783 | 3.55086439  | 0.368516362 | NA          | NA |
| ASV_16s_12348 | 0.067279413 | -0.168972759 | 3.550900941 | 0.333595144 | 0.999856824 | NA |
| ASV_16s_12349 | 0.150730531 | 0.220077755  | 3.550768657 | 0.640258213 | NA          | NA |
| ASV_16s_12350 | 0.117417163 | 0.336080534  | 3.550793387 | 0.795270545 | NA          | NA |
| ASV_16s_12351 | 0.263472423 | -0.423104233 | 3.550319446 | 1.241985807 | 0.989927837 | NA |
| ASV_16s_12352 | 0.243998017 | 0.064997648  | 3.550407335 | 1.287182754 | NA          | NA |
| ASV_16s_12353 | 0.263730982 | -0.043295833 | 3.550167467 | 1.348199934 | 0.987105292 | NA |
| ASV_16s_12354 | 0.262355848 | 0.074097911  | 3.550215782 | 1.283525986 | 0.988874903 | NA |
| ASV_16s_12355 | 0.247337767 | 0.280354329  | 3.550247445 | 1.293932276 | 0.98860095  | NA |
| ASV_16s_12356 | 0.266044005 | -0.222037867 | 3.550460158 | 0.797851305 | 0.99746582  | NA |
| ASV_16s_12357 | 0.268011851 | -0.4921761   | 3.55044303  | 1.203619215 | 0.990843327 | NA |
| ASV_16s_12358 | 0.24368785  | -0.324674993 | 3.550124725 | 0.861089355 | 0.996769391 | NA |
| ASV_16s_12359 | 0.302755813 | 0.301653281  | 3.549850975 | 1.649548691 | 0.976676396 | NA |
| ASV_16s_12360 | 0.257549186 | 0.201030152  | 3.549920639 | 1.433323612 | 0.984528661 | NA |
| ASV_16s_12361 | 0.273029225 | 0.209884044  | 3.54977948  | 1.500355391 | 0.982297354 | NA |
| ASV_16s_12362 | 0.249302885 | -0.470856535 | 3.550516809 | 1.121612897 | NA          | NA |
| ASV_16s_12363 | 0.264517473 | -0.283682536 | 3.549903479 | 1.037351373 | 0.994203294 | NA |
| ASV_16s_12364 | 0.256010391 | -0.047828697 | 3.550273255 | 0.840457968 | 0.99700881  | NA |
| ASV_16s_12365 | 0.34691136  | -0.563289296 | 3.550032977 | 1.333057867 | 0.987534002 | NA |
| ASV_16s_12366 | 0.302393627 | -0.743190643 | 3.549909399 | 1.171406065 | 0.991570433 | NA |
| ASV_16s_12367 | 0.33427261  | 1.26607906   | 3.550557539 | 1.074167779 | NA          | NA |
| ASV_16s_12368 | 0.285104152 | -0.708060499 | 3.549999267 | 1.173697394 | NA          | NA |
| ASV_16s_12369 | 0.316525854 | -0.735855614 | 3.549845704 | 1.255777165 | 0.989585432 | NA |
| ASV_16s_12370 | 0.261279735 | -0.629739525 | 3.550554382 | 0.869175091 | NA          | NA |
| ASV_16s_12371 | 0.310185052 | -0.68933973  | 3.549933714 | 1.300444833 | NA          | NA |
| ASV_16s_12372 | 0.283981517 | -0.614897752 | 3.550121504 | 1.254867123 | 0.989608245 | NA |
| ASV_16s_12373 | 0.312634879 | -0.616644282 | 3.550207838 | 1.063691432 | NA          | NA |
| ASV_16s_12374 | 0.315330633 | -0.269395102 | 3.549369591 | 1.384198487 | 0.98605034  | NA |
| ASV_16s_12375 | 0.30694367  | -0.61466969  | 3.550074649 | 1.313356138 | NA          | NA |
| ASV_16s_12376 | 0.27452881  | 0.250890381  | 3.550485393 | 1.324422593 | 0.987774529 | NA |
| ASV_16s_12377 | 0.301886338 | -0.571787019 | 3.550172092 | 1.299915621 | NA          | NA |
| ASV_16s_12378 | 0.326922841 | 0.22593356   | 3.549285136 | 1.030201536 | NA          | NA |
| ASV_16s_12379 | 0.256562588 | 1.642078203  | 3.550497576 | 0.541988389 | 0.999277751 | NA |
| ASV_16s_12380 | 0.263029443 | 0.002674115  | 3.550519435 | 1.134748968 | NA          | NA |
| ASV_16s_12381 | 0.260646188 | -0.659353307 | 3.551149192 | 0.661632643 | 0.998613479 | NA |
| ASV_16s_12382 | 0.300670942 | 0.373919872  | 3.550687724 | 1.233246263 | 0.990141156 | NA |
| ASV_16s_12383 | 0.292977442 | 1.791955715  | 3.54976288  | 0.369995439 | 0.999797145 | NA |
| ASV_16s_12384 | 0.281281481 | 0.11023852   | 3.550646385 | 1.129798749 | 0.99245449  | NA |
| ASV_16s_12385 | 0.333926962 | 0.207048663  | 3.549452323 | 1.220839747 | NA          | NA |
| ASV_16s_12386 | 0.319712327 | 0.137105693  | 3.550627451 | 1.193936838 | 0.991065831 | NA |
| ASV_16s_12387 | 0.283289359 | 0.213607129  | 3.54944945  | 1.316710486 | NA          | NA |
| ASV_16s_12388 | 0.254448619 | -0.49098797  | 3.55053745  | 1.131477647 | NA          | NA |
| ASV_16s_12389 | 0.289821905 | 0.12934424   | 3.550258492 | 1.489501845 | 0.982670881 | NA |
| ASV_16s_12390 | 0.261952061 | -0.072626145 | 3.550537287 | 1.120600027 | NA          | NA |
| ASV_16s_12391 | 0.37399688  | 1.620682958  | 3.550405414 | 0.701647054 | 0.99832305  | NA |
| ASV_16s_12392 | 0.311115797 | -0.002493867 | 3.550737758 | 1.17289849  | NA          | NA |
| ASV_16s_12393 | 0.26761173  | -0.438906675 | 3.550689333 | 0.928910577 | 0.995895267 | NA |
| ASV_16s_12394 | 0.209653842 | 0.108168375  | 3.550618161 | 0.84584705  | 0.996947432 | NA |

|               |             |              |             |              |             |    |
|---------------|-------------|--------------|-------------|--------------|-------------|----|
| ASV_16s_12395 | 0.29284614  | 0.159253318  | 3.550792411 | 1.129352153  | 0.992463646 | NA |
| ASV_16s_12396 | 0.316724347 | 0.36518229   | 2.586597626 | 1.859796915  | 0.967191035 | NA |
| ASV_16s_12397 | 0.282711634 | 1.719259923  | 3.550418542 | 0.483252743  | NA          | NA |
| ASV_16s_12398 | 0.336591044 | 1.715046841  | 3.550420397 | 0.605628349  | 0.998960503 | NA |
| ASV_16s_12399 | 0.252332047 | 0.387664786  | 3.551198334 | 0.749696266  | NA          | NA |
| ASV_16s_12400 | 0.195542265 | 0.37152268   | 3.551539139 | 0.663815226  | NA          | NA |
| ASV_16s_12401 | 0.295029707 | -0.058841696 | 3.549620878 | 1.324118813  | 0.987782938 | NA |
| ASV_16s_12402 | 0.264768589 | 0.391031122  | 3.55112575  | 0.765800622  | NA          | NA |
| ASV_16s_12403 | 0.318717283 | 0.888608301  | 3.550770857 | 0.955410661  | 0.995516114 | NA |
| ASV_16s_12404 | 0.451168686 | -0.858585267 | 3.549483374 | 0.627103287  | NA          | NA |
| ASV_16s_12405 | 0.283063232 | -0.581874286 | 3.550472254 | 0.883314396  | NA          | NA |
| ASV_16s_12406 | 0.289542535 | 1.317956742  | 3.550466288 | 0.706113023  | NA          | NA |
| ASV_16s_12407 | 0.129221421 | 1.107580277  | 3.551127796 | 0.43283373   | NA          | NA |
| ASV_16s_12408 | 0.240896401 | 0.409617026  | 3.550909535 | 0.667035268  | NA          | NA |
| ASV_16s_12409 | 0.083878073 | 0.344194099  | 3.551744869 | 0.340101472  | NA          | NA |
| ASV_16s_12410 | 0.280488782 | -0.073120578 | 3.550644032 | 1.095235318  | NA          | NA |
| ASV_16s_12411 | 0.135345643 | -0.486729887 | 3.550913919 | 0.480717828  | NA          | NA |
| ASV_16s_12412 | 0.135345643 | -0.486729887 | 3.550913919 | 0.480717828  | NA          | NA |
| ASV_16s_12413 | 0.152373832 | -0.123934754 | 3.55055055  | 0.701246203  | NA          | NA |
| ASV_16s_12414 | 0.150645399 | -0.508093489 | 3.550759662 | 0.513954617  | NA          | NA |
| ASV_16s_12415 | 0.295471948 | 1.321514524  | 3.550448418 | 0.713061632  | NA          | NA |
| ASV_16s_12416 | 0.269715815 | -0.078952952 | 3.550717247 | 1.086623483  | NA          | NA |
| ASV_16s_12417 | 0.229989743 | -0.078834639 | 3.550752183 | 1.006678143  | NA          | NA |
| ASV_16s_12418 | 0.241375664 | -0.078870561 | 3.550741    | 1.030840321  | 0.994315579 | NA |
| ASV_16s_12419 | 0.160273832 | 0.220069071  | 3.550757242 | 0.669312394  | 0.998560575 | NA |
| ASV_16s_12420 | 0.162748021 | 0.220066989  | 3.5507545   | 0.676626624  | 0.998508952 | NA |
| ASV_16s_12421 | 0.180366138 | 0.596069484  | 3.550702275 | 0.659526262  | NA          | NA |
| ASV_16s_12422 | 0.180366138 | 0.596069484  | 3.550702275 | 0.659526262  | NA          | NA |
| ASV_16s_12423 | 0.180366138 | 0.596069484  | 3.550702275 | 0.659526262  | NA          | NA |
| ASV_16s_12424 | 0.253686071 | 0.951625913  | 3.550428636 | 0.912547753  | 0.996118667 | NA |
| ASV_16s_12425 | 0.17725324  | -1.031083631 | 3.550642091 | 0.287236222  | NA          | NA |
| ASV_16s_12426 | 0.273695621 | 0.126539317  | 3.550054254 | 1.677550398  | NA          | NA |
| ASV_16s_12427 | 0.461655326 | -0.725562479 | 3.54807653  | 0.794417879  | NA          | NA |
| ASV_16s_12428 | 0.297123524 | -0.263742181 | 3.550652014 | 0.98500866   | NA          | NA |
| ASV_16s_12429 | 0.244855293 | -0.068448196 | 3.550237164 | 1.390324902  | NA          | NA |
| ASV_16s_12430 | 0.229139176 | 0.908216605  | 3.550796058 | 0.828298012  | NA          | NA |
| ASV_16s_12431 | 0.248819439 | -0.067764806 | 3.550311093 | 1.351291348  | NA          | NA |
| ASV_16s_12432 | 0.272410387 | -0.672013907 | 3.550361963 | 1.131956732  | NA          | NA |
| ASV_16s_12433 | 0.268180484 | 0.368796975  | 3.551371851 | 0.767218168  | NA          | NA |
| ASV_16s_12434 | 0.260450021 | -0.05654932  | 3.550510152 | 1.269601114  | NA          | NA |
| ASV_16s_12435 | 0.183030174 | 0.622159593  | 3.551706203 | 0.459811904  | NA          | NA |
| ASV_16s_12436 | 0.258454523 | -0.049558228 | 3.550612341 | 1.240066262  | NA          | NA |
| ASV_16s_12437 | 0.290458472 | 0.716944786  | 3.55067777  | 1.183353561  | 0.991305141 | NA |
| ASV_16s_12438 | 0.276741245 | 0.009236622  | 3.550878539 | 1.098243351  | NA          | NA |
| ASV_16s_12439 | 0.193894745 | 0.279461264  | 3.551556766 | 0.677686451  | NA          | NA |
| ASV_16s_12440 | 0.195955602 | -0.526103061 | 3.551141327 | 0.670137457  | NA          | NA |
| ASV_16s_12441 | 0.193012647 | -0.078681339 | 3.550797565 | 0.919972248  | NA          | NA |
| ASV_16s_12442 | 0.193012647 | -0.078681339 | 3.550797565 | 0.919972248  | NA          | NA |
| ASV_16s_12443 | 0.252291448 | -0.105706642 | 3.550383409 | 1.271239541  | 0.989193081 | NA |
| ASV_16s_12444 | 0.453967738 | 0.687697126  | 3.550071634 | 2.040018684  | 0.957592227 | NA |
| ASV_16s_12445 | 0.337649644 | 0.116477346  | 3.550246723 | 1.704272157  | 0.974384813 | NA |
| ASV_16s_12446 | 0.272039481 | -0.411743304 | 3.550524629 | 0.883579059  | NA          | NA |
| ASV_16s_12447 | 0.338612663 | 0.433967567  | 3.550767524 | 1.271040077  | NA          | NA |
| ASV_16s_12448 | 0.285386477 | 0.360952156  | 3.551111308 | 0.892940409  | NA          | NA |
| ASV_16s_12449 | 0.258234287 | 0.360354592  | 3.550987163 | 1.107781683  | NA          | NA |
| ASV_16s_12450 | 0.258234287 | 0.360354592  | 3.550987163 | 1.107781683  | NA          | NA |
| ASV_16s_12451 | 0.310527932 | 0.315939467  | 3.550818531 | 1.162035822  | 0.991774907 | NA |
| ASV_16s_12452 | 0.279981683 | 0.315939484  | 3.550843652 | 1.109693219  | 0.992859803 | NA |
| ASV_16s_12453 | 0.278270705 | 0.315939485  | 3.550845223 | 1.106592769  | 0.992921052 | NA |
| ASV_16s_12454 | 0.276217531 | 0.315939487  | 3.550847133 | 1.102848209  | 0.992994582 | NA |
| ASV_16s_12455 | 0.332679933 | 0.315939284  | 3.550803187 | 1.1968931501 | 0.990998294 | NA |
| ASV_16s_12456 | 0.274506553 | 0.315939489  | 3.550848746 | 1.099707015  | 0.99305589  | NA |
| ASV_16s_12457 | 0.315657723 | 0.315939457  | 3.550814798 | 1.170256954  | 0.991595678 | NA |
| ASV_16s_12458 | 0.332465717 | 0.621545657  | 3.55077083  | 1.600316862  | 0.978632129 | NA |
| ASV_16s_12459 | 0.450062029 | 1.185249902  | 3.550118459 | 0.978454459  | 0.995168648 | NA |
| ASV_16s_12460 | 0.363916406 | 1.169422604  | 3.5504912   | 0.936400077  | 0.9957903   | NA |
| ASV_16s_12461 | 0.373865235 | 0.734613802  | 3.550863622 | 1.231573892  | 0.990181653 | NA |



|               |             |              |             |             |             |    |
|---------------|-------------|--------------|-------------|-------------|-------------|----|
| ASV_16s_12462 | 0.35680088  | 0.734567997  | 3.550877341 | 1.207900349 | NA          | NA |
| ASV_16s_12463 | 0.35680088  | 0.734567997  | 3.550877341 | 1.207900349 | NA          | NA |
| ASV_16s_12464 | 0.35680088  | 0.734567997  | 3.550877341 | 1.207900349 | NA          | NA |
| ASV_16s_12465 | 0.269715815 | 0.69323899   | 3.550827134 | 1.02583201  | NA          | NA |
| ASV_16s_12466 | 0.269715815 | 0.69323899   | 3.550827134 | 1.02583201  | NA          | NA |
| ASV_16s_12467 | 0.228458808 | 0.278950938  | 3.55137448  | 0.71618951  | NA          | NA |
| ASV_16s_12468 | 0.228458808 | 0.278950938  | 3.55137448  | 0.71618951  | NA          | NA |
| ASV_16s_12469 | 0.228458808 | 0.278950938  | 3.55137448  | 0.71618951  | NA          | NA |
| ASV_16s_12470 | 0.233119347 | -0.08352935  | 3.550514822 | 1.248926772 | NA          | NA |
| ASV_16s_12471 | 0.228572889 | -0.100340171 | 3.550525947 | 1.257790512 | NA          | NA |
| ASV_16s_12472 | 0.228572889 | -0.100340171 | 3.550525947 | 1.257790512 | NA          | NA |
| ASV_16s_12473 | 0.23467286  | -0.162837851 | 3.550421194 | 1.313034775 | 0.988087346 | NA |
| ASV_16s_12474 | 0.228595706 | -0.15226119  | 3.550471391 | 1.288265055 | 0.988750653 | NA |
| ASV_16s_12475 | 0.234931779 | -0.175586164 | 3.550409742 | 1.316727078 | 0.987986465 | NA |
| ASV_16s_12476 | 0.228607114 | -0.177626304 | 3.550450824 | 1.294244411 | 0.98859267  | NA |
| ASV_16s_12477 | 0.228612818 | -0.190230153 | 3.550442053 | 1.295867222 | 0.988549558 | NA |
| ASV_16s_12478 | 0.232681367 | -0.233797355 | 3.550392156 | 1.308717263 | 0.988204648 | NA |
| ASV_16s_12479 | 0.236744211 | -0.263943699 | 3.550356839 | 1.315172901 | 0.988028992 | NA |
| ASV_16s_12480 | 0.247595108 | -0.301630277 | 3.55028359  | 1.334542692 | 0.987492354 | NA |
| ASV_16s_12481 | 0.234476686 | -0.286417792 | 3.550366142 | 1.297596196 | 0.988503517 | NA |
| ASV_16s_12482 | 0.256441801 | -0.323169991 | 3.55023258  | 1.347373521 | 0.987128919 | NA |
| ASV_16s_12483 | 0.24173146  | -0.320399498 | 3.550316983 | 1.297220258 | 0.988513537 | NA |
| ASV_16s_12484 | 0.233987369 | -0.325094489 | 3.550365564 | 1.263239075 | 0.989397209 | NA |
| ASV_16s_12485 | 0.233233429 | -0.337724545 | 3.550370949 | 1.247009136 | 0.989803941 | NA |
| ASV_16s_12486 | 0.251017655 | -0.368392034 | 3.550266512 | 1.275019333 | 0.989095803 | NA |
| ASV_16s_12487 | 0.24446746  | -0.375843709 | 3.550306502 | 1.242371498 | NA          | NA |
| ASV_16s_12488 | 0.315615938 | -0.597457498 | 3.550075321 | 1.020465801 | 0.994491604 | NA |
| ASV_16s_12489 | 0.081671273 | -0.343378448 | 3.551593384 | 0.405644384 | NA          | NA |
| ASV_16s_12490 | 0.303868684 | -0.680374429 | 3.550199866 | 0.829266601 | 0.99713368  | NA |
| ASV_16s_12491 | 0.293607651 | -0.680149204 | 3.550250495 | 0.818257395 | NA          | NA |
| ASV_16s_12492 | 0.278213348 | -0.679369019 | 3.550332626 | 0.800922798 | NA          | NA |
| ASV_16s_12493 | 0.232576457 | -0.661031992 | 3.550582478 | 0.741577936 | NA          | NA |
| ASV_16s_12494 | 0.072890209 | -0.169093512 | 3.550870755 | 0.362047443 | NA          | NA |
| ASV_16s_12495 | 0.043917445 | -0.159256175 | 3.551071394 | 0.202113595 | NA          | NA |
| ASV_16s_12496 | 0.10161147  | 0.220148086  | 3.550861176 | 0.465779868 | NA          | NA |
| ASV_16s_12499 | 0.280433524 | -0.585502801 | 3.550344483 | 1.162406776 | 0.991766872 | NA |
| ASV_16s_12500 | 0.323066019 | -0.775799526 | 3.549981218 | 0.986783603 | 0.995038927 | NA |
| ASV_16s_12501 | 0.244294578 | -0.340310857 | 3.550158316 | 0.841355456 | 0.996998645 | NA |
| ASV_16s_12502 | 0.245275008 | 0.296920466  | 3.550167131 | 1.290116375 | 0.988701883 | NA |
| ASV_16s_12503 | 0.271869263 | -0.313891878 | 3.550487859 | 1.138138064 | 0.992282218 | NA |
| ASV_16s_12504 | 0.257538408 | 0.158287352  | 3.54987577  | 1.433699027 | 0.984516664 | NA |
| ASV_16s_12505 | 0.305078187 | -0.742907692 | 3.550314288 | 0.833737188 | 0.997084216 | NA |
| ASV_16s_12506 | 0.297967778 | -0.757006794 | 3.549965864 | 1.101777669 | 0.993015515 | NA |
| ASV_16s_12507 | 0.299575908 | -0.119272093 | 3.549905685 | 1.265578161 | 0.989337777 | NA |
| ASV_16s_12508 | 0.237778864 | -0.243740736 | 3.550059221 | 0.987133402 | NA          | NA |
| ASV_16s_12509 | 0.313355979 | -0.745984811 | 3.549852491 | 1.217808621 | 0.990511061 | NA |
| ASV_16s_12510 | 0.307432354 | -0.738851546 | 3.549882888 | 1.20814692  | 0.990738105 | NA |
| ASV_16s_12511 | 0.291529011 | -0.719452623 | 3.549964986 | 1.177801872 | 0.991429055 | NA |
| ASV_16s_12512 | 0.30491348  | -0.729150085 | 3.549899848 | 1.219359706 | 0.990474292 | NA |
| ASV_16s_12513 | 0.298756753 | -0.719700291 | 3.549931063 | 1.209054407 | 0.990716926 | NA |
| ASV_16s_12514 | 0.246950676 | 0.212089038  | 3.55014449  | 1.386639438 | NA          | NA |
| ASV_16s_12515 | 0.289961573 | -0.708086627 | 3.549976605 | 1.196304335 | 0.991011741 | NA |
| ASV_16s_12516 | 0.256868338 | 0.075460654  | 3.550905208 | 0.980316999 | 0.995139832 | NA |
| ASV_16s_12517 | 0.268613667 | 0.859338654  | 3.549745994 | 0.925937939 | 0.995936455 | NA |
| ASV_16s_12518 | 0.301235262 | -0.697412771 | 3.549945466 | 1.254221643 | 0.989624407 | NA |
| ASV_16s_12519 | 0.287967467 | -0.668404973 | 3.550509522 | 0.89588848  | NA          | NA |
| ASV_16s_12520 | 0.238225921 | 0.294385179  | 3.551522463 | 0.561997491 | NA          | NA |
| ASV_16s_12521 | 0.309559933 | -0.710633273 | 3.549898931 | 1.27222422  | 0.98916779  | NA |
| ASV_16s_12522 | 0.294046136 | -0.682904525 | 3.549993526 | 1.247538247 | 0.989790837 | NA |
| ASV_16s_12523 | 0.304671533 | -0.306547665 | 3.550109954 | 1.12255546  | 0.992602137 | NA |
| ASV_16s_12524 | 0.302984814 | -0.696136004 | 3.549942029 | 1.263903472 | 0.989380349 | NA |
| ASV_16s_12525 | 0.290016159 | -0.670192429 | 3.550022193 | 1.243661134 | 0.989886621 | NA |
| ASV_16s_12526 | 0.246069148 | 0.502239519  | 3.551135775 | 0.968518747 | NA          | NA |
| ASV_16s_12527 | 0.312061219 | -0.691956862 | 3.549923483 | 1.302104762 | 0.988382921 | NA |
| ASV_16s_12528 | 0.250044631 | 0.529098678  | 3.550273975 | 0.878522246 | NA          | NA |
| ASV_16s_12529 | 0.29797394  | -0.508312312 | 3.549930825 | 0.879644805 | 0.996543675 | NA |
| ASV_16s_12530 | 0.279270798 | -0.474912515 | 3.550395568 | 1.261978125 | 0.989429162 | NA |

|               |             |              |             |             |             |    |
|---------------|-------------|--------------|-------------|-------------|-------------|----|
| ASV_16s_12531 | 0.292339112 | -1.24269841  | 3.549917228 | 0.515767608 | NA          | NA |
| ASV_16s_12532 | 0.320697009 | -0.244578247 | 3.550145435 | 1.203456421 | NA          | NA |
| ASV_16s_12533 | 0.234218153 | 0.324266772  | 3.55013293  | 1.112446509 | NA          | NA |
| ASV_16s_12534 | 0.265194186 | 1.269802805  | 3.550643669 | 0.748543111 | NA          | NA |
| ASV_16s_12535 | 0.278358901 | -0.071288297 | 3.551121375 | 0.877677636 | NA          | NA |
| ASV_16s_12536 | 0.284503333 | -0.05934364  | 3.551171336 | 0.834675481 | NA          | NA |
| ASV_16s_12537 | 0.318595799 | 2.08192749   | 3.549747923 | 0.267619628 | 0.999932082 | NA |
| ASV_16s_12538 | 0.291902891 | 0.085165394  | 3.550691704 | 1.778243366 | 0.97108921  | NA |
| ASV_16s_12539 | 0.258793415 | 0.161088267  | 3.55013189  | 1.047363079 | 0.994027896 | NA |
| ASV_16s_12540 | 0.266046557 | -0.07175751  | 3.550419377 | 1.250090827 | 0.989727469 | NA |
| ASV_16s_12541 | 0.271010915 | 0.986201724  | 3.551472373 | 0.837111174 | NA          | NA |
| ASV_16s_12542 | 0.260728587 | 1.715164419  | 3.550468468 | 0.402287746 | NA          | NA |
| ASV_16s_12543 | 0.336386049 | 0.205691234  | 3.551124442 | 0.572432649 | NA          | NA |
| ASV_16s_12544 | 0.284997006 | 1.299500752  | 3.550642378 | 0.762252532 | NA          | NA |
| ASV_16s_12545 | 0.284997006 | 1.299500752  | 3.550642378 | 0.762252532 | NA          | NA |
| ASV_16s_12546 | 0.247905169 | 0.386423388  | 3.551225856 | 0.743758514 | NA          | NA |
| ASV_16s_12547 | 0.192111699 | 0.370120894  | 3.55156169  | 0.657876099 | NA          | NA |
| ASV_16s_12548 | 0.262206568 | 0.353389603  | 3.551891153 | 0.433252128 | NA          | NA |
| ASV_16s_12549 | 0.304971721 | -0.713880126 | 3.55016587  | 0.943806163 | 0.995684811 | NA |
| ASV_16s_12550 | 0.191864108 | -0.54016584  | 3.550710416 | 0.658978498 | NA          | NA |
| ASV_16s_12551 | 0.264983958 | -0.072461559 | 3.550470926 | 1.142815996 | NA          | NA |
| ASV_16s_12552 | 0.236670148 | 0.408050042  | 3.550929674 | 0.661059297 | NA          | NA |
| ASV_16s_12553 | 0.256395425 | 0.776703897  | 3.550314975 | 1.223763557 | NA          | NA |
| ASV_16s_12554 | 0.082406528 | 0.343919488  | 3.551750158 | 0.335515209 | NA          | NA |
| ASV_16s_12555 | 0.111749329 | -0.04850358  | 3.55141847  | 0.480960811 | NA          | NA |
| ASV_16s_12556 | 0.308376658 | 0.882745209  | 3.550054121 | 1.398258149 | 0.985624556 | NA |
| ASV_16s_12557 | 0.132971158 | -0.482503791 | 3.550937991 | 0.475193639 | NA          | NA |
| ASV_16s_12558 | 0.132971158 | -0.482503791 | 3.550937991 | 0.475193639 | NA          | NA |
| ASV_16s_12559 | 0.132971158 | -0.482503791 | 3.550937991 | 0.475193639 | NA          | NA |
| ASV_16s_12560 | 0.132971158 | -0.482503791 | 3.550937991 | 0.475193639 | NA          | NA |
| ASV_16s_12561 | 0.172218486 | 0.130152045  | 3.550341294 | 0.872533753 | NA          | NA |
| ASV_16s_12562 | 0.272062825 | -0.547776237 | 3.549888406 | 0.70570568  | NA          | NA |
| ASV_16s_12563 | 0.161490422 | -0.520913331 | 3.550662691 | 0.535913573 | NA          | NA |
| ASV_16s_12564 | 0.161490422 | -0.520913331 | 3.550662691 | 0.535913573 | NA          | NA |
| ASV_16s_12565 | 0.161490422 | -0.520913331 | 3.550662691 | 0.535913573 | NA          | NA |
| ASV_16s_12566 | 0.148002497 | -0.504757204 | 3.550785109 | 0.508406048 | NA          | NA |
| ASV_16s_12567 | 0.117327047 | 1.075752023  | 3.551199766 | 0.403173024 | NA          | NA |
| ASV_16s_12568 | 0.263728111 | -0.07893598  | 3.550721847 | 1.075293091 | 0.993520827 | NA |
| ASV_16s_12569 | 0.156922525 | 0.220072016  | 3.550761098 | 0.659241366 | 0.998629683 | NA |
| ASV_16s_12570 | 0.168101591 | 0.22006271   | 3.550748846 | 0.692123188 | 0.998395529 | NA |
| ASV_16s_12571 | 0.250337141 | 0.310937928  | 3.550849431 | 1.030304451 | NA          | NA |
| ASV_16s_12572 | 0.209964093 | 0.604907941  | 3.551890291 | 0.507553135 | NA          | NA |
| ASV_16s_12573 | 0.236492235 | 1.483845356  | 3.550686031 | 0.533040081 | 0.999316284 | NA |
| ASV_16s_12574 | 0.239829348 | -0.068499563 | 3.550265037 | 1.374813593 | NA          | NA |
| ASV_16s_12575 | 0.212857671 | 1.378276842  | 3.550983527 | 0.566786965 | NA          | NA |
| ASV_16s_12576 | 0.239624024 | -0.096807396 | 3.550285573 | 1.068299044 | NA          | NA |
| ASV_16s_12577 | 0.254056238 | -0.067648898 | 3.550323061 | 1.335674612 | NA          | NA |
| ASV_16s_12578 | 0.324026312 | 1.382639519  | 3.549988441 | 0.964702258 | NA          | NA |
| ASV_16s_12579 | 0.253924097 | -0.049558267 | 3.55062127  | 1.22931279  | NA          | NA |
| ASV_16s_12580 | 0.266886011 | -0.094920482 | 3.550551775 | 1.078436262 | 0.993462112 | NA |
| ASV_16s_12581 | 0.420929343 | 0.737441675  | 3.550349192 | 1.530485468 | 0.981235447 | NA |
| ASV_16s_12582 | 0.332775737 | 1.334690064  | 3.550321297 | 0.752769863 | NA          | NA |
| ASV_16s_12583 | 0.296458713 | 1.247688195  | 3.550026786 | 1.190011785 | NA          | NA |
| ASV_16s_12584 | 0.284617937 | 0.859393639  | 3.550683494 | 1.113623945 | 0.992781671 | NA |
| ASV_16s_12585 | 0.328939844 | 0.469128628  | 3.550800021 | 1.159280808 | NA          | NA |
| ASV_16s_12586 | 0.18962646  | -0.078664501 | 3.550802608 | 0.911281387 | NA          | NA |
| ASV_16s_12587 | 0.304374098 | 0.358445454  | 3.550294594 | 1.391795685 | 0.98582123  | NA |
| ASV_16s_12588 | 0.250185535 | -0.029010961 | 3.550843952 | 1.107967557 | NA          | NA |
| ASV_16s_12589 | 0.250185535 | -0.029010961 | 3.550843952 | 1.107967557 | NA          | NA |
| ASV_16s_12590 | 0.328598793 | 0.343400619  | 3.550009041 | 1.538292285 | NA          | NA |
| ASV_16s_12591 | 0.234100281 | 0.278256047  | 3.550550711 | 1.209879518 | NA          | NA |
| ASV_16s_12592 | 0.307508696 | 0.35489854   | 3.550247411 | 1.417861632 | NA          | NA |
| ASV_16s_12593 | 0.240872586 | 0.287728346  | 3.550260097 | 1.161208714 | NA          | NA |
| ASV_16s_12594 | 0.285392263 | 0.360366023  | 3.55094991  | 1.158308507 | NA          | NA |
| ASV_16s_12595 | 0.253703861 | 0.360352458  | 3.55099416  | 1.098816735 | NA          | NA |
| ASV_16s_12596 | 0.253703861 | 0.360352458  | 3.55099416  | 1.098816735 | NA          | NA |
| ASV_16s_12597 | 0.287898039 | 0.315939495  | 3.550836644 | 1.123718032 | 0.992578563 | NA |

|               |             |              |             |             |             |    |
|---------------|-------------|--------------|-------------|-------------|-------------|----|
| ASV_16s_12598 | 0.270801284 | 0.315939511  | 3.550852317 | 1.092804448 | 0.993189415 | NA |
| ASV_16s_12599 | 0.324644722 | 0.315939469  | 3.550808523 | 1.184461093 | 0.991280287 | NA |
| ASV_16s_12600 | 0.264983958 | 0.315939611  | 3.550858113 | 1.081831665 | NA          | NA |
| ASV_16s_12601 | 0.264983958 | 0.315939611  | 3.550858113 | 1.081831665 | NA          | NA |
| ASV_16s_12602 | 0.350541215 | 0.734549518  | 3.550882714 | 1.198896838 | NA          | NA |
| ASV_16s_12603 | 0.350541215 | 0.734549518  | 3.550882714 | 1.198896838 | NA          | NA |
| ASV_16s_12604 | 0.350541215 | 0.734549518  | 3.550882714 | 1.198896838 | NA          | NA |
| ASV_16s_12605 | 0.173642576 | 0.733482228  | 3.551192683 | 0.849939547 | NA          | NA |
| ASV_16s_12606 | 0.294349255 | 0.69331575   | 3.550804232 | 1.069793465 | 0.993622754 | NA |
| ASV_16s_12607 | 0.329590751 | 0.693407939  | 3.550777383 | 1.126985054 | 0.992512063 | NA |
| ASV_16s_12608 | 0.326392566 | 0.693400569  | 3.550779586 | 1.122018179 | 0.992613016 | NA |
| ASV_16s_12609 | 0.321356698 | 0.693388186  | 3.550783132 | 1.114166222 | 0.99277085  | NA |
| ASV_16s_12610 | 0.298807602 | 0.693328597  | 3.550800489 | 1.077376179 | 0.993481952 | NA |
| ASV_16s_12611 | 0.295049419 | 0.69331779   | 3.550803638 | 1.070986586 | 0.993600729 | NA |
| ASV_16s_12612 | 0.264983958 | 0.693222417  | 3.550832027 | 1.016906947 | NA          | NA |
| ASV_16s_12613 | 0.264983958 | 0.693222417  | 3.550832027 | 1.016906947 | NA          | NA |
| ASV_16s_12614 | 0.307154282 | 0.693351633  | 3.550793777 | 1.091252073 | 0.993219218 | NA |
| ASV_16s_12615 | 0.224379187 | 0.279695353  | 3.551401741 | 0.710145666 | NA          | NA |
| ASV_16s_12616 | 0.258665345 | -0.120587363 | 3.550313794 | 1.345877145 | NA          | NA |
| ASV_16s_12617 | 0.238977394 | -0.133312514 | 3.550419386 | 1.299503911 | 0.988452583 | NA |
| ASV_16s_12618 | 0.241959012 | -0.174728816 | 3.550365772 | 1.332773428 | 0.98754197  | NA |
| ASV_16s_12619 | 0.22832001  | -0.177125506 | 3.550453274 | 1.293002528 | 0.988625594 | NA |
| ASV_16s_12620 | 0.247902298 | -0.218760321 | 3.550304518 | 1.358311309 | 0.98681407  | NA |
| ASV_16s_12621 | 0.231369995 | -0.207004623 | 3.550413369 | 1.306464671 | 0.988265565 | NA |
| ASV_16s_12622 | 0.2245389   | -0.20916853  | 3.550459233 | 1.28143286  | 0.988929511 | NA |
| ASV_16s_12623 | 0.224544604 | -0.222013242 | 3.550452729 | 1.280626435 | 0.988950506 | NA |
| ASV_16s_12624 | 0.231887833 | -0.232666829 | 3.550397919 | 1.305960837 | 0.988279164 | NA |
| ASV_16s_12625 | 0.230121034 | -0.242731879 | 3.550405997 | 1.297581261 | 0.988503915 | NA |
| ASV_16s_12626 | 0.230886382 | -0.256364436 | 3.550396772 | 1.296717305 | 0.988526935 | NA |
| ASV_16s_12627 | 0.224584533 | -0.314416517 | 3.550429403 | 1.237185037 | NA          | NA |
| ASV_16s_12628 | 0.239734377 | -0.3444278   | 3.550330189 | 1.263725606 | 0.989384864 | NA |
| ASV_16s_12629 | 0.242804217 | -0.360786147 | 3.55031353  | 1.255441785 | 0.989593843 | NA |
| ASV_16s_12630 | 0.240778499 | -0.358845188 | 3.55032562  | 1.250492812 | 0.989717468 | NA |
| ASV_16s_12631 | 0.229660237 | -0.347695105 | 3.550395793 | 1.222384209 | 0.990402341 | NA |
| ASV_16s_12632 | 0.227387008 | -0.359453862 | 3.550413211 | 1.200480662 | 0.990915826 | NA |
| ASV_16s_12633 | 0.244340618 | -0.403504047 | 3.550315921 | 1.203720666 | 0.990840978 | NA |
| ASV_16s_12634 | 0.231230862 | -0.489312183 | 3.5504499   | 1.03024747  | 0.994325734 | NA |
| ASV_16s_12635 | 0.080212858 | -0.33713582  | 3.551604481 | 0.400686692 | NA          | NA |
| ASV_16s_12636 | 0.080212858 | -0.33713582  | 3.551604481 | 0.400686692 | NA          | NA |
| ASV_16s_12637 | 0.290011386 | 0.503213907  | 3.550740503 | 1.05122457  | NA          | NA |
| ASV_16s_12638 | 0.337188544 | -0.681012327 | 3.550056559 | 0.862618356 | 0.996751166 | NA |
| ASV_16s_12639 | 0.272604098 | -0.678666774 | 3.550363966 | 0.794311835 | 0.99750157  | NA |
| ASV_16s_12640 | 0.300681852 | -0.680305649 | 3.55021531  | 0.82585878  | 0.997171013 | NA |
| ASV_16s_12641 | 0.280623432 | -0.679663711 | 3.550319518 | 0.803730488 | NA          | NA |
| ASV_16s_12642 | 0.280623432 | -0.679663711 | 3.550319518 | 0.803730488 | NA          | NA |
| ASV_16s_12643 | 0.238619723 | -0.664734983 | 3.550548909 | 0.75012278  | NA          | NA |
| ASV_16s_12644 | 0.071588598 | -0.169067323 | 3.550877351 | 0.355512619 | NA          | NA |
| ASV_16s_12645 | 0.071588598 | -0.169067323 | 3.550877351 | 0.355512619 | NA          | NA |
| ASV_16s_12646 | 0.071588598 | -0.169067323 | 3.550877351 | 0.355512619 | NA          | NA |
| ASV_16s_12647 | 0.071801074 | -0.141739694 | 3.550870329 | 0.407517526 | NA          | NA |
| ASV_16s_12648 | 0.024311443 | -0.127259151 | 3.551363569 | 0.073888617 | NA          | NA |
| ASV_16s_12649 | 0.075483999 | 0.22022323   | 3.550959117 | 0.350708079 | NA          | NA |
| ASV_16s_12651 | 0.240121785 | -0.326250293 | 3.55059893  | 0.734863979 | NA          | NA |
| ASV_16s_12652 | 0.294727007 | -0.764077309 | 3.550127994 | 0.95089739  | 0.995582221 | NA |
| ASV_16s_12653 | 0.29314415  | -0.736900844 | 3.550244995 | 1.08972579  | 0.99324844  | NA |
| ASV_16s_12654 | 0.254802208 | 0.189843439  | 3.549924427 | 1.372972501 | 0.986384745 | NA |
| ASV_16s_12655 | 0.230562135 | 0.216663357  | 3.550182782 | 1.29583634  | 0.98855038  | NA |
| ASV_16s_12656 | 0.230562135 | 0.216663357  | 3.550182782 | 1.29583634  | 0.98855038  | NA |
| ASV_16s_12657 | 0.238161138 | 0.145324996  | 3.550128858 | 1.351018946 | 0.987024499 | NA |
| ASV_16s_12658 | 0.260482176 | -0.788304791 | 3.5503156   | 0.995422314 | 0.994902043 | NA |
| ASV_16s_12659 | 0.310327401 | -0.772270087 | 3.549947467 | 1.049826739 | 0.993984222 | NA |
| ASV_16s_12660 | 0.295460478 | -0.76046092  | 3.550005047 | 1.057672688 | 0.993843782 | NA |
| ASV_16s_12661 | 0.279125814 | -0.74554992  | 3.550093381 | 1.039869721 | NA          | NA |
| ASV_16s_12662 | 0.308900535 | -0.760697594 | 3.549889808 | 1.14082204  | 0.992226251 | NA |
| ASV_16s_12663 | 0.234193573 | -0.229137494 | 3.550097049 | 0.992502048 | NA          | NA |
| ASV_16s_12664 | 0.23511949  | 0.107351651  | 3.550113155 | 1.306357417 | 0.988268461 | NA |
| ASV_16s_12665 | 0.31011043  | -0.73602752  | 3.54987228  | 1.227828176 | 0.990271982 | NA |

|               |             |              |             |             |             |    |
|---------------|-------------|--------------|-------------|-------------|-------------|----|
| ASV_16s_12666 | 0.294622682 | -0.71188174  | 3.549953699 | 1.203481809 | 0.990846509 | NA |
| ASV_16s_12667 | 0.302822676 | -0.725501952 | 3.549910614 | 1.216358061 | NA          | NA |
| ASV_16s_12668 | 0.337247649 | -0.677204286 | 3.550433576 | 0.864867026 | 0.996724242 | NA |
| ASV_16s_12669 | 0.300982916 | -0.698779581 | 3.549944301 | 1.252136234 | NA          | NA |
| ASV_16s_12670 | 0.230981235 | -0.469334212 | 3.550461117 | 1.012812794 | 0.994619192 | NA |
| ASV_16s_12671 | 0.297844471 | -0.673127314 | 3.549995723 | 1.269557023 | 0.989236209 | NA |
| ASV_16s_12672 | 0.284839271 | -0.656450018 | 3.550054753 | 1.236306662 | 0.990066779 | NA |
| ASV_16s_12673 | 0.30855549  | -0.675511205 | 3.549964598 | 1.30072632  | 0.988419874 | NA |
| ASV_16s_12674 | 0.33112611  | -0.701755696 | 3.549856822 | 1.355242584 | NA          | NA |
| ASV_16s_12675 | 0.329656391 | 0.852867705  | 3.550067612 | 1.46040799  | NA          | NA |
| ASV_16s_12676 | 0.285119716 | -0.601148482 | 3.550273618 | 1.060935059 | 0.993784779 | NA |
| ASV_16s_12677 | 0.250787137 | 0.710177594  | 3.551874684 | 0.596918923 | 0.99900858  | NA |
| ASV_16s_12678 | 0.289587009 | 0.206504895  | 3.549495707 | 1.349016775 | NA          | NA |
| ASV_16s_12679 | 0.266299267 | -0.065699612 | 3.551543236 | 0.533007213 | 0.999316422 | NA |
| ASV_16s_12680 | 0.253959046 | -0.3581335   | 3.550691901 | 0.781273132 | NA          | NA |
| ASV_16s_12681 | 0.264786621 | -0.303730509 | 3.551089581 | 0.846211978 | NA          | NA |
| ASV_16s_12682 | 0.281238017 | 0.679191798  | 3.550879858 | 1.116573339 | 0.992722693 | NA |
| ASV_16s_12683 | 0.275066809 | 0.350860642  | 3.551333767 | 0.749688127 | NA          | NA |
| ASV_16s_12684 | 0.133092383 | 1.027248726  | 3.551407253 | 0.427540743 | NA          | NA |
| ASV_16s_12685 | 0.271597302 | -0.092238642 | 3.550828055 | 0.906862084 | NA          | NA |
| ASV_16s_12686 | 0.291447543 | -0.092708619 | 3.550766798 | 0.930163137 | 0.995877831 | NA |
| ASV_16s_12687 | 0.394266981 | 0.886910763  | 3.550057976 | 0.905798696 | 0.996208462 | NA |
| ASV_16s_12688 | 0.296350236 | -0.088923365 | 3.540671485 | 1.214137811 | 0.990597726 | NA |
| ASV_16s_12689 | 0.259376899 | 0.20918309   | 3.551264105 | 0.355869926 | NA          | NA |
| ASV_16s_12690 | 0.279907774 | 1.296233774  | 3.550663093 | 0.756020101 | NA          | NA |
| ASV_16s_12691 | 0.279907774 | 1.296233774  | 3.550663093 | 0.756020101 | NA          | NA |
| ASV_16s_12692 | 0.256815025 | 1.27832631   | 3.550757473 | 0.726016547 | NA          | NA |
| ASV_16s_12693 | 0.256815025 | 1.27832631   | 3.550757473 | 0.726016547 | NA          | NA |
| ASV_16s_12694 | 0.243478291 | 0.385498449  | 3.55125159  | 0.737672854 | NA          | NA |
| ASV_16s_12695 | 0.289426582 | 1.187445646  | 3.550648723 | 0.84851625  | 0.996916729 | NA |
| ASV_16s_12696 | 0.319075955 | 0.367298608  | 3.55162645  | 0.480998302 | NA          | NA |
| ASV_16s_12697 | 0.188681133 | 0.368553618  | 3.551583507 | 0.651818867 | NA          | NA |
| ASV_16s_12698 | 0.188681133 | 0.368553618  | 3.551583507 | 0.651818867 | NA          | NA |
| ASV_16s_12699 | 0.278176604 | 1.346891914  | 3.550454919 | 0.78997787  | NA          | NA |
| ASV_16s_12700 | 0.125364232 | 0.345787035  | 3.551986451 | 0.284600532 | NA          | NA |
| ASV_16s_12701 | 0.346806695 | 0.28705467   | 3.551051127 | 0.555858694 | NA          | NA |
| ASV_16s_12702 | 0.17633076  | -0.912780829 | 3.550776149 | 0.350865781 | NA          | NA |
| ASV_16s_12703 | 0.271261782 | -0.563398091 | 3.550171155 | 0.770609126 | NA          | NA |
| ASV_16s_12704 | 0.344528125 | 1.335738942  | 3.550275798 | 0.763998139 | NA          | NA |
| ASV_16s_12705 | 0.257769805 | 0.727071356  | 3.550016594 | 0.715908912 | NA          | NA |
| ASV_16s_12706 | 0.214835038 | 0.399510855  | 3.551044719 | 0.628625434 | NA          | NA |
| ASV_16s_12707 | 0.232443895 | 0.406455312  | 3.550950473 | 0.654981436 | NA          | NA |
| ASV_16s_12708 | 0.080934983 | 0.343640541  | 3.551755578 | 0.33088701  | NA          | NA |
| ASV_16s_12709 | 0.130596673 | -0.478204088 | 3.55096279  | 0.469595964 | NA          | NA |
| ASV_16s_12710 | 0.158606665 | -0.517752899 | 3.550687821 | 0.530179871 | NA          | NA |
| ASV_16s_12711 | 0.145359596 | -0.501362807 | 3.550811352 | 0.502784979 | NA          | NA |
| ASV_16s_12712 | 0.286688406 | 1.316008644  | 3.550474384 | 0.702642904 | NA          | NA |
| ASV_16s_12713 | 0.115231921 | 1.069816887  | 3.55121372  | 0.397777461 | NA          | NA |
| ASV_16s_12714 | 0.227612888 | -0.078825001 | 3.550754671 | 1.001424411 | 0.994805526 | NA |
| ASV_16s_12715 | 0.145441741 | 0.220083086  | 3.550775637 | 0.623480956 | NA          | NA |
| ASV_16s_12716 | 0.145441741 | 0.220083086  | 3.550775637 | 0.623480956 | NA          | NA |
| ASV_16s_12717 | 0.159035011 | 0.220070054  | 3.550758655 | 0.665559328 | 0.998586595 | NA |
| ASV_16s_12718 | 0.159627951 | 0.22006953   | 3.55075798  | 0.667331001 | 0.998574351 | NA |
| ASV_16s_12719 | 0.161257719 | 0.220068274  | 3.55075615  | 0.672173068 | 0.998540529 | NA |
| ASV_16s_12720 | 0.162252102 | 0.220067287  | 3.55075505  | 0.675110546 | 0.998519752 | NA |
| ASV_16s_12721 | 0.271871801 | 0.310936523  | 3.550828789 | 1.071923567 | 0.993583398 | NA |
| ASV_16s_12722 | 0.218394101 | 0.43378666   | 3.550672002 | 0.697452672 | 0.998355233 | NA |
| ASV_16s_12723 | 0.314003006 | 1.5529096    | 3.550401743 | 0.74731379  | NA          | NA |
| ASV_16s_12724 | 0.233316849 | -0.068677576 | 3.550353475 | 1.346013322 | NA          | NA |
| ASV_16s_12725 | 0.234803404 | -0.06854752  | 3.550301077 | 1.357298586 | NA          | NA |
| ASV_16s_12726 | 0.229012137 | -0.495261842 | 3.550381019 | 1.001077203 | 0.994811141 | NA |
| ASV_16s_12727 | 0.210318409 | 1.364944624  | 3.551006625 | 0.566645725 | NA          | NA |
| ASV_16s_12728 | 0.208322783 | 1.333746593  | 3.551048885 | 0.57766322  | NA          | NA |
| ASV_16s_12729 | 0.209727893 | 0.609746111  | 3.551034467 | 0.720656582 | NA          | NA |
| ASV_16s_12730 | 0.237896678 | 0.78408401   | 3.551243406 | 1.090361693 | NA          | NA |
| ASV_16s_12731 | 0.198246882 | 1.304040119  | 3.551076793 | 0.550780702 | NA          | NA |
| ASV_16s_12732 | 0.266306595 | -0.019957622 | 3.550139339 | 1.032348995 | NA          | NA |

|               |             |              |             |             |             |    |
|---------------|-------------|--------------|-------------|-------------|-------------|----|
| ASV_16s_12733 | 0.251993459 | -0.067407414 | 3.550385089 | 1.303922228 | NA          | NA |
| ASV_16s_12734 | 0.195692992 | 0.279473954  | 3.551552447 | 0.680955037 | NA          | NA |
| ASV_16s_12735 | 0.195692992 | 0.279473954  | 3.551552447 | 0.680955037 | NA          | NA |
| ASV_16s_12736 | 0.38044701  | 0.445685526  | 3.549556189 | 1.171736836 | 0.991563158 | NA |
| ASV_16s_12737 | 0.316863998 | 0.026119403  | 3.550910839 | 0.728429396 | 0.998107635 | NA |
| ASV_16s_12738 | 0.337429204 | 0.325832079  | 3.550893975 | 0.832363807 | 0.997099471 | NA |
| ASV_16s_12739 | 0.309307661 | 1.344105472  | 3.549954229 | 1.106443526 | 0.992923992 | NA |
| ASV_16s_12740 | 0.347834524 | 0.59416146   | 3.550808562 | 0.976147021 | 0.995204195 | NA |
| ASV_16s_12741 | 0.462212073 | 0.454821575  | 3.549685924 | 2.015365902 | NA          | NA |
| ASV_16s_12742 | 0.332734684 | 0.372137961  | 3.550382876 | 1.381119606 | 0.986142546 | NA |
| ASV_16s_12743 | 0.309609127 | 0.527387439  | 3.550223531 | 1.362137405 | 0.986702838 | NA |
| ASV_16s_12744 | 0.360603537 | 0.522028816  | 3.550811456 | 1.873730282 | 0.966497233 | NA |
| ASV_16s_12745 | 0.245717936 | -0.028993333 | 3.550849836 | 1.098888294 | NA          | NA |
| ASV_16s_12746 | 0.245717936 | -0.028993333 | 3.550849836 | 1.098888294 | NA          | NA |
| ASV_16s_12747 | 0.287012218 | 0.384178679  | 3.550529671 | 1.28119078  | 0.988935816 | NA |
| ASV_16s_12748 | 0.205058695 | -0.073659569 | 3.550807315 | 0.973871158 | NA          | NA |
| ASV_16s_12749 | 0.201374133 | -0.073640627 | 3.550812667 | 0.964928726 | NA          | NA |
| ASV_16s_12750 | 0.201374133 | -0.073640627 | 3.550812667 | 0.964928726 | NA          | NA |
| ASV_16s_12751 | 0.284520267 | 0.343589008  | 3.550149456 | 1.435097477 | NA          | NA |
| ASV_16s_12752 | 0.325731672 | 0.788339352  | 3.549628732 | 1.157270907 | 0.991877768 | NA |
| ASV_16s_12753 | 0.3053068   | 0.36188586   | 3.550343622 | 1.377005536 | NA          | NA |
| ASV_16s_12754 | 0.352808824 | 0.132245887  | 3.549873735 | 2.253517694 | NA          | NA |
| ASV_16s_12755 | 0.280295972 | 0.360364052  | 3.550956365 | 1.149155907 | NA          | NA |
| ASV_16s_12756 | 0.249173435 | 0.360350246  | 3.551001411 | 1.089697733 | NA          | NA |
| ASV_16s_12757 | 0.249173435 | 0.360350246  | 3.551001411 | 1.089697733 | NA          | NA |
| ASV_16s_12758 | 0.284992083 | 0.745749387  | 3.550624654 | 1.326152675 | 0.987726569 | NA |
| ASV_16s_12759 | 0.295660588 | 0.315939505  | 3.550830131 | 1.137125234 | 0.992303271 | NA |
| ASV_16s_12760 | 0.294048532 | 0.315939335  | 3.550831452 | 1.134376525 | 0.992360226 | NA |
| ASV_16s_12761 | 0.269833579 | 0.31593953   | 3.55085327  | 1.090961025 | 0.993224797 | NA |
| ASV_16s_12762 | 0.269833579 | 0.31593953   | 3.55085327  | 1.090961025 | 0.993224797 | NA |
| ASV_16s_12763 | 0.269833579 | 0.31593953   | 3.55085327  | 1.090961025 | 0.993224797 | NA |
| ASV_16s_12764 | 0.295822567 | 0.502458443  | 3.550802966 | 1.838524876 | 0.968234612 | NA |
| ASV_16s_12765 | 0.260252102 | 0.315939624  | 3.550863024 | 1.072695703 | NA          | NA |
| ASV_16s_12766 | 0.373727304 | 1.166407285  | 3.55061804  | 0.957173857 | 0.995490116 | NA |
| ASV_16s_12767 | 0.365896401 | 0.734592831  | 3.550869886 | 1.220581932 | 0.990445256 | NA |
| ASV_16s_12768 | 0.344281551 | 0.734530367  | 3.550888283 | 1.189731836 | NA          | NA |
| ASV_16s_12769 | 0.344281551 | 0.734530367  | 3.550888283 | 1.189731836 | NA          | NA |
| ASV_16s_12770 | 0.344281551 | 0.734530367  | 3.550888283 | 1.189731836 | NA          | NA |
| ASV_16s_12771 | 0.170541816 | 0.733443277  | 3.551203805 | 0.841399993 | NA          | NA |
| ASV_16s_12772 | 0.314119386 | 0.693370319  | 3.550788438 | 1.102607029 | 0.992999302 | NA |
| ASV_16s_12773 | 0.324416078 | 0.693395925  | 3.550780978 | 1.118876061 | 0.992676435 | NA |
| ASV_16s_12774 | 0.382324093 | 0.693515851  | 3.550746431 | 1.202157451 | NA          | NA |
| ASV_16s_12775 | 0.382324093 | 0.693515851  | 3.550746431 | 1.202157451 | NA          | NA |
| ASV_16s_12776 | 0.371755935 | 0.271647252  | 3.550511677 | 0.874361581 | NA          | NA |
| ASV_16s_12777 | 0.220368014 | 0.007069859  | 3.550762009 | 1.101139343 | NA          | NA |
| ASV_16s_12778 | 0.224183348 | -0.048902557 | 3.550630629 | 1.178094865 | NA          | NA |
| ASV_16s_12779 | 0.235351096 | -0.08818214  | 3.55049378  | 1.244262547 | NA          | NA |
| ASV_16s_12780 | 0.23297178  | -0.184689126 | 3.55041651  | 1.30624188  | 0.988271579 | NA |
| ASV_16s_12781 | 0.227290374 | -0.213367826 | 3.550437852 | 1.291285944 | 0.988671006 | NA |
| ASV_16s_12782 | 0.24287994  | -0.259402385 | 3.550320283 | 1.333799255 | 0.987513217 | NA |
| ASV_16s_12783 | 0.243307801 | -0.259941907 | 3.550317547 | 1.336943099 | 0.987424846 | NA |
| ASV_16s_12784 | 0.224268909 | -0.247362984 | 3.550444832 | 1.275066716 | 0.98909458  | NA |
| ASV_16s_12785 | 0.23323366  | -0.259413517 | 3.550380651 | 1.3029995   | 0.988358896 | NA |
| ASV_16s_12786 | 0.225793901 | -0.262371677 | 3.550430015 | 1.276213501 | 0.989064958 | NA |
| ASV_16s_12787 | 0.220482095 | -0.268399135 | 3.550466514 | 1.254579684 | 0.989615444 | NA |
| ASV_16s_12788 | 0.220487799 | -0.281956848 | 3.550463102 | 1.247920097 | 0.989781373 | NA |
| ASV_16s_12789 | 0.226058524 | -0.289097932 | 3.550422081 | 1.264885437 | 0.989355399 | NA |
| ASV_16s_12790 | 0.22253063  | -0.32589712  | 3.550443939 | 1.217905922 | 0.990508757 | NA |
| ASV_16s_12791 | 0.226328851 | -0.330194655 | 3.550417262 | 1.228380555 | 0.990258694 | NA |
| ASV_16s_12792 | 0.078754442 | -0.330795603 | 3.551615873 | 0.39567627  | NA          | NA |
| ASV_16s_12793 | 0.078754442 | -0.330795603 | 3.551615873 | 0.39567627  | NA          | NA |
| ASV_16s_12794 | 0.295869125 | -0.680199271 | 3.550239212 | 0.820660784 | 0.997227342 | NA |
| ASV_16s_12795 | 0.275521188 | -0.679032436 | 3.550347568 | 0.797749177 | NA          | NA |
| ASV_16s_12796 | 0.234281182 | -0.662072819 | 3.550572976 | 0.743960091 | NA          | NA |
| ASV_16s_12797 | 0.234281182 | -0.662072819 | 3.550572976 | 0.743960091 | NA          | NA |
| ASV_16s_12798 | 0.226684739 | -0.656629518 | 3.550614016 | 0.732912432 | 0.998069875 | NA |
| ASV_16s_12799 | 0.164002393 | 1.240870161  | 3.551323441 | 0.44391155  | 0.999627046 | NA |

|               |             |              |             |             |             |    |
|---------------|-------------|--------------|-------------|-------------|-------------|----|
| ASV_16s_12800 | 0.08274272  | -0.005004415 | 3.550825148 | 0.642291885 | 0.998740921 | NA |
| ASV_16s_12801 | 0.062345073 | -0.168849312 | 3.550931979 | 0.307525953 | NA          | NA |
| ASV_16s_12802 | 0.142797345 | 0.220085896  | 3.550779321 | 0.614919571 | NA          | NA |
| ASV_16s_12803 | 0.097982489 | 0.220155995  | 3.550871686 | 0.450886505 | NA          | NA |
| ASV_16s_12804 | 0.156099794 | 0.596007851  | 3.550725912 | 0.591680649 | NA          | NA |
| ASV_16s_12805 | 0.253425824 | -0.358573136 | 3.550320163 | 1.271222499 | 0.989193518 | NA |
| ASV_16s_12806 | 0.225140566 | 0.120500083  | 3.550496115 | 1.197000708 | 0.990995792 | NA |
| ASV_16s_12807 | 0.235543856 | 0.042773395  | 3.550348095 | 1.280709778 | 0.988948337 | NA |
| ASV_16s_12808 | 0.278858366 | -0.699255904 | 3.550381438 | 0.820647807 | NA          | NA |
| ASV_16s_12809 | 0.304814833 | -0.757851412 | 3.550134235 | 0.907843979 | 0.996181394 | NA |
| ASV_16s_12810 | 0.22555494  | 0.379640035  | 3.550167095 | 1.114142675 | 0.99277132  | NA |
| ASV_16s_12811 | 0.302826607 | -0.768610923 | 3.550011519 | 1.01449349  | 0.994591336 | NA |
| ASV_16s_12812 | 0.284114163 | -0.756833814 | 3.550129417 | 0.978658113 | 0.995165503 | NA |
| ASV_16s_12813 | 0.251639868 | 0.316886987  | 3.551865382 | 0.447206343 | NA          | NA |
| ASV_16s_12814 | 0.199094361 | -0.08400883  | 3.5504932   | 0.664197202 | NA          | NA |
| ASV_16s_12815 | 0.272545541 | -0.439120265 | 3.550265692 | 1.1523428   | 0.991983121 | NA |
| ASV_16s_12816 | 0.248475323 | -0.078096716 | 3.549937963 | 1.238417088 | 0.990015286 | NA |
| ASV_16s_12817 | 0.29677351  | -0.743729221 | 3.549944774 | 1.141626005 | 0.992209437 | NA |
| ASV_16s_12818 | 0.229522652 | 0.129118812  | 3.550120639 | 1.292388263 | 0.988641857 | NA |
| ASV_16s_12819 | 0.286804713 | -0.724566534 | 3.549992176 | 1.141616322 | 0.99220964  | NA |
| ASV_16s_12820 | 0.288386718 | -0.670901912 | 3.550000366 | 1.185903559 | 0.991247851 | NA |
| ASV_16s_12821 | 0.27006998  | -0.691532117 | 3.550083278 | 1.131185105 | NA          | NA |
| ASV_16s_12822 | 0.286316255 | -0.710709079 | 3.549992874 | 1.173951621 | 0.991514341 | NA |
| ASV_16s_12823 | 0.272916426 | -0.700550605 | 3.550065787 | 1.138483129 | 0.992275037 | NA |
| ASV_16s_12824 | 0.296469405 | -0.707933818 | 3.54994944  | 1.21888866  | NA          | NA |
| ASV_16s_12825 | 0.293418353 | -0.694803519 | 3.549976542 | 1.225923312 | NA          | NA |
| ASV_16s_12826 | 0.209485991 | -0.995513293 | 3.550700618 | 0.549262728 | 0.999245364 | NA |
| ASV_16s_12827 | 0.24570525  | 0.288536652  | 3.550212741 | 0.870831679 | NA          | NA |
| ASV_16s_12828 | 0.230164415 | -0.83536021  | 3.550593363 | 0.619350147 | NA          | NA |
| ASV_16s_12829 | 0.24127585  | -0.19133969  | 3.550791515 | 0.969402475 | NA          | NA |
| ASV_16s_12830 | 0.278519832 | -0.614885742 | 3.550135163 | 1.236899161 | NA          | NA |
| ASV_16s_12831 | 0.288262544 | -0.631965593 | 3.550081803 | 1.257386135 | NA          | NA |
| ASV_16s_12832 | 0.290685678 | -0.631969513 | 3.550075906 | 1.265168578 | NA          | NA |
| ASV_16s_12833 | 0.280665714 | -0.613588589 | 3.550131936 | 1.242103249 | 0.989924951 | NA |
| ASV_16s_12834 | 0.286429755 | -0.603558336 | 3.55013638  | 1.255176718 | 0.989600488 | NA |
| ASV_16s_12835 | 0.282615157 | 0.275923717  | 3.550522482 | 1.327118409 | 0.987699747 | NA |
| ASV_16s_12836 | 0.283552056 | -0.554909684 | 3.550240975 | 1.246887439 | 0.989806954 | NA |
| ASV_16s_12837 | 0.279234925 | 0.984661575  | 3.551173323 | 1.077658582 | 0.99347667  | NA |
| ASV_16s_12838 | 0.271219064 | -0.427155706 | 3.550268219 | 1.526270056 | 0.98138623  | NA |
| ASV_16s_12839 | 0.279408319 | -0.482877258 | 3.550370311 | 1.229356208 | NA          | NA |
| ASV_16s_12840 | 0.298014827 | -0.487450608 | 3.550319534 | 0.896024403 | NA          | NA |
| ASV_16s_12841 | 0.281684691 | -0.452027933 | 3.550474372 | 0.922812038 | 0.995979477 | NA |
| ASV_16s_12842 | 0.248345662 | -0.09180027  | 3.550737172 | 1.091818007 | NA          | NA |
| ASV_16s_12843 | 0.240192005 | -0.146888493 | 3.550866638 | 1.107784106 | NA          | NA |
| ASV_16s_12844 | 0.241036573 | 0.35474037   | 3.551199334 | 0.821987761 | NA          | NA |
| ASV_16s_12845 | 0.222250056 | 0.260971682  | 3.551586879 | 0.659819467 | 0.998625778 | NA |
| ASV_16s_12846 | 0.295559086 | 1.836429018  | 3.550162482 | 0.454783095 | 0.999595784 | NA |
| ASV_16s_12847 | 0.25728438  | 1.715121023  | 3.550354168 | 0.432883581 | 0.999657025 | NA |
| ASV_16s_12848 | 0.260829579 | 1.281788618  | 3.550741255 | 0.731414029 | NA          | NA |
| ASV_16s_12849 | 0.252145661 | 1.274203382  | 3.550777025 | 0.719572994 | NA          | NA |
| ASV_16s_12850 | 0.252895569 | 0.85982619   | 3.550085988 | 0.90911928  | NA          | NA |
| ASV_16s_12851 | 0.253520492 | 0.77872444   | 3.550093673 | 1.084046506 | NA          | NA |
| ASV_16s_12852 | 0.302474649 | 0.626442675  | 3.550482395 | 1.281933013 | NA          | NA |
| ASV_16s_12853 | 0.239051413 | 0.384670206  | 3.551277261 | 0.731468554 | NA          | NA |
| ASV_16s_12854 | 0.239051413 | 0.384670206  | 3.551277261 | 0.731468554 | NA          | NA |
| ASV_16s_12855 | 0.289400892 | 0.395725188  | 3.55098456  | 0.795217835 | NA          | NA |
| ASV_16s_12856 | 0.354813911 | -0.153392623 | 3.54976754  | 1.667320608 | 0.975945804 | NA |
| ASV_16s_12857 | 0.185250567 | 0.366833725  | 3.551604721 | 0.645639426 | NA          | NA |
| ASV_16s_12858 | 0.185250567 | 0.366833725  | 3.551604721 | 0.645639426 | NA          | NA |
| ASV_16s_12859 | 0.244755782 | 1.263193861  | 3.550636009 | 0.787160689 | NA          | NA |
| ASV_16s_12860 | 0.2508334   | 0.387236786  | 3.551207779 | 0.747624485 | NA          | NA |
| ASV_16s_12861 | 0.292066761 | -0.074125723 | 3.550789929 | 1.226359086 | NA          | NA |
| ASV_16s_12862 | 0.185011819 | -0.535627369 | 3.55077069  | 0.647202866 | NA          | NA |
| ASV_16s_12863 | 0.307857005 | 0.297206121  | 3.550235453 | 0.968822984 | 0.995315909 | NA |
| ASV_16s_12864 | 0.210928946 | 0.397890005  | 3.551067605 | 0.622491899 | NA          | NA |
| ASV_16s_12865 | 0.263507646 | 0.080433194  | 3.550047326 | 1.205726235 | NA          | NA |
| ASV_16s_12866 | 0.155722907 | -0.514292304 | 3.550713244 | 0.524325133 | NA          | NA |

|               |             |              |             |             |             |    |
|---------------|-------------|--------------|-------------|-------------|-------------|----|
| ASV_16s_12867 | 0.155722907 | -0.514292304 | 3.550713244 | 0.524325133 | NA          | NA |
| ASV_16s_12868 | 0.155722907 | -0.514292304 | 3.550713244 | 0.524325133 | NA          | NA |
| ASV_16s_12869 | 0.142716694 | -0.497908294 | 3.550838432 | 0.497085746 | NA          | NA |
| ASV_16s_12870 | 0.142716694 | -0.497908294 | 3.550838432 | 0.497085746 | NA          | NA |
| ASV_16s_12871 | 0.260816181 | 0.012453292  | 3.550728707 | 1.566291251 | NA          | NA |
| ASV_16s_12872 | 0.21788502  | -0.078789105 | 3.550765369 | 0.979675942 | NA          | NA |
| ASV_16s_12873 | 0.21788502  | -0.078789105 | 3.550765369 | 0.979675942 | NA          | NA |
| ASV_16s_12874 | 0.15667209  | 0.220072161  | 3.550761401 | 0.658424089 | 0.998635192 | NA |
| ASV_16s_12875 | 0.244441137 | 1.266419673  | 3.550939162 | 0.621348609 | 0.998869804 | NA |
| ASV_16s_12876 | 0.238647415 | 0.743978777  | 3.550913258 | 0.859366328 | 0.996789848 | NA |
| ASV_16s_12877 | 0.226804349 | -0.068946172 | 3.550517221 | 1.283947318 | NA          | NA |
| ASV_16s_12878 | 0.227795386 | -0.06877176  | 3.550447331 | 1.305930669 | NA          | NA |
| ASV_16s_12879 | 0.25158242  | 1.648054849  | 3.550536366 | 0.43825159  | NA          | NA |
| ASV_16s_12880 | 0.229777459 | -0.068592811 | 3.550346883 | 1.337772497 | NA          | NA |
| ASV_16s_12881 | 0.231759533 | -0.06838272  | 3.550301879 | 1.34290121  | NA          | NA |
| ASV_16s_12882 | 0.282302265 | -0.825610779 | 3.550254916 | 0.823420412 | 0.997197529 | NA |
| ASV_16s_12883 | 0.232750569 | -0.068248929 | 3.550299211 | 1.340854    | NA          | NA |
| ASV_16s_12884 | 0.281013372 | 0.299841985  | 3.550047769 | 1.208794427 | 0.990722996 | NA |
| ASV_16s_12885 | 0.236219198 | -0.067488194 | 3.550407397 | 1.289243106 | NA          | NA |
| ASV_16s_12886 | 0.214815169 | 0.073023661  | 3.551117106 | 0.938572782 | NA          | NA |
| ASV_16s_12887 | 0.244863244 | -0.049562574 | 3.550640338 | 1.207194688 | NA          | NA |
| ASV_16s_12888 | 0.36329272  | 0.082423156  | 3.549176261 | 1.406047024 | 0.98538533  | NA |
| ASV_16s_12889 | 0.247045528 | 0.364136746  | 3.551088356 | 0.92018521  | NA          | NA |
| ASV_16s_12890 | 0.25193866  | 0.866670779  | 3.550863401 | 1.147406486 | NA          | NA |
| ASV_16s_12891 | 0.066672809 | -0.242874361 | 3.551698954 | 0.343047765 | NA          | NA |
| ASV_16s_12892 | 0.306213603 | 1.078994474  | 3.550302562 | 1.208829227 | 0.990722184 | NA |
| ASV_16s_12893 | 0.315858545 | 0.34270532   | 3.549953536 | 1.602179221 | NA          | NA |
| ASV_16s_12894 | 0.360924666 | 0.380032349  | 3.550433445 | 1.39189828  | 0.985818121 | NA |
| ASV_16s_12895 | 0.30064021  | 0.288071871  | 3.550355728 | 1.536239027 | 0.98102848  | NA |
| ASV_16s_12896 | 0.336210889 | 0.606886776  | 3.550855773 | 1.823310066 | 0.968969428 | NA |
| ASV_16s_12897 | 0.241250338 | -0.028975048 | 3.550855938 | 1.089655305 | NA          | NA |
| ASV_16s_12898 | 0.241250338 | -0.028975048 | 3.550855938 | 1.089655305 | NA          | NA |
| ASV_16s_12899 | 0.241250338 | -0.028975048 | 3.550855938 | 1.089655305 | NA          | NA |
| ASV_16s_12900 | 0.253406185 | 0.416670378  | 3.550662769 | 1.139818426 | NA          | NA |
| ASV_16s_12901 | 0.275659213 | -0.073924362 | 3.550732311 | 1.121711687 | NA          | NA |
| ASV_16s_12902 | 0.245346713 | -0.073828542 | 3.550759259 | 1.063085886 | 0.993745683 | NA |
| ASV_16s_12903 | 0.249689265 | 0.18787346   | 3.550682732 | 1.152312369 | 0.99198377  | NA |
| ASV_16s_12904 | 0.201330355 | -0.073640538 | 3.55081274  | 0.964788275 | NA          | NA |
| ASV_16s_12905 | 0.201330355 | -0.073640538 | 3.55081274  | 0.964788275 | NA          | NA |
| ASV_16s_12906 | 0.198650673 | -0.073624517 | 3.550816757 | 0.958197443 | 0.995474979 | NA |
| ASV_16s_12907 | 0.305114666 | 0.369091568  | 3.550434998 | 1.341087088 | NA          | NA |
| ASV_16s_12908 | 0.30390003  | 0.35286446   | 3.550229239 | 1.425307365 | 0.984783484 | NA |
| ASV_16s_12909 | 0.299047136 | 0.36185127   | 3.550353023 | 1.364276859 | NA          | NA |
| ASV_16s_12910 | 0.33367532  | -0.074059616 | 3.550694358 | 1.218261281 | NA          | NA |
| ASV_16s_12911 | 0.245314267 | -0.073828457 | 3.550759283 | 1.063064827 | NA          | NA |
| ASV_16s_12912 | 0.259893453 | 0.339129465  | 3.550952451 | 0.846597745 | NA          | NA |
| ASV_16s_12913 | 0.346184986 | 0.344667148  | 3.550769489 | 0.951964699 | 0.995566645 | NA |
| ASV_16s_12914 | 0.244643009 | 0.360347952  | 3.551008928 | 1.080421629 | NA          | NA |
| ASV_16s_12915 | 0.424126281 | 0.994134427  | 3.549989484 | 1.584326128 | 0.979245886 | NA |
| ASV_16s_12916 | 0.29535697  | 0.315939521  | 3.550830375 | 1.136631572 | 0.99231352  | NA |
| ASV_16s_12917 | 0.271454935 | 0.315939544  | 3.550851698 | 1.093937633 | 0.993167607 | NA |
| ASV_16s_12918 | 0.270316743 | 0.315939545  | 3.550852807 | 1.091814573 | 0.993208429 | NA |
| ASV_16s_12919 | 0.305712024 | 0.315939374  | 3.550822182 | 1.153995349 | 0.99194786  | NA |
| ASV_16s_12920 | 0.338718003 | 0.315939352  | 3.550799363 | 1.205923459 | 0.990789871 | NA |
| ASV_16s_12921 | 0.26373294  | 0.315939552  | 3.550859406 | 1.079369681 | 0.993444611 | NA |
| ASV_16s_12922 | 0.262706353 | 0.315939554  | 3.550860465 | 1.07739942  | 0.993481518 | NA |
| ASV_16s_12923 | 0.296281307 | 0.315939368  | 3.550829631 | 1.138137968 | 0.99228222  | NA |
| ASV_16s_12924 | 0.286844523 | 0.315939372  | 3.550837573 | 1.121767704 | 0.992618084 | NA |
| ASV_16s_12925 | 0.261337571 | 0.315939555  | 3.55086189  | 1.074761244 | 0.993530729 | NA |
| ASV_16s_12926 | 0.283495907 | 0.450045014  | 3.550814663 | 1.742572351 | 0.97270692  | NA |
| ASV_16s_12927 | 0.344045516 | 0.596256922  | 3.550629863 | 0.980516985 | NA          | NA |
| ASV_16s_12928 | 0.344045516 | 0.596256922  | 3.550629863 | 0.980516985 | NA          | NA |
| ASV_16s_12929 | 0.366241708 | 1.17879286   | 3.55032546  | 0.898537696 | NA          | NA |
| ASV_16s_12930 | 0.338021886 | 0.734510508  | 3.550894057 | 1.18039995  | NA          | NA |
| ASV_16s_12931 | 0.167441056 | 0.733403836  | 3.551215337 | 0.83274322  | NA          | NA |
| ASV_16s_12932 | 0.318213814 | 0.693380981  | 3.550785414 | 1.109137457 | 0.992870807 | NA |
| ASV_16s_12933 | 0.255520245 | 0.693187416  | 3.550842356 | 0.998587935 | NA          | NA |

|               |             |              |             |             |             |    |
|---------------|-------------|--------------|-------------|-------------|-------------|----|
| ASV_16s_12934 | 0.216219943 | 0.280429714  | 3.551452311 | 0.697622905 | NA          | NA |
| ASV_16s_12935 | 0.216219943 | 0.280429714  | 3.551452311 | 0.697622905 | NA          | NA |
| ASV_16s_12936 | 0.216219943 | 0.280429714  | 3.551452311 | 0.697622905 | NA          | NA |
| ASV_16s_12937 | 0.216219943 | 0.280429714  | 3.551452311 | 0.697622905 | NA          | NA |
| ASV_16s_12938 | 0.231220138 | 0.03762477   | 3.55073782  | 1.053269482 | NA          | NA |
| ASV_16s_12939 | 0.228624354 | 0.029699944  | 3.55074141  | 1.064090264 | NA          | NA |
| ASV_16s_12940 | 0.219361194 | -0.0939536   | 3.550603449 | 1.207966131 | NA          | NA |
| ASV_16s_12941 | 0.21860155  | -0.092258123 | 3.550611641 | 1.204922283 | NA          | NA |
| ASV_16s_12942 | 0.221139401 | -0.11150788  | 3.550567991 | 1.227318698 | NA          | NA |
| ASV_16s_12943 | 0.216334025 | -0.115093054 | 3.550601182 | 1.221108468 | 0.990432731 | NA |
| ASV_16s_12944 | 0.216339729 | -0.128838084 | 3.550585645 | 1.232109443 | 0.990168696 | NA |
| ASV_16s_12945 | 0.221657239 | -0.139323479 | 3.55053397  | 1.250372942 | 0.989720451 | NA |
| ASV_16s_12946 | 0.22718218  | -0.213167505 | 3.55043887  | 1.285572628 | 0.988821348 | NA |
| ASV_16s_12947 | 0.235868158 | -0.225868025 | 3.550375045 | 1.315741981 | 0.988013431 | NA |
| ASV_16s_12948 | 0.221185034 | -0.216869437 | 3.550479532 | 1.268390791 | 0.989266041 | NA |
| ASV_16s_12949 | 0.22372859  | -0.246589028 | 3.550448999 | 1.273176063 | 0.989143309 | NA |
| ASV_16s_12950 | 0.216385361 | -0.23596933  | 3.550506667 | 1.248075266 | 0.98977525  | NA |
| ASV_16s_12951 | 0.221196442 | -0.243002033 | 3.550468368 | 1.264656274 | 0.989361225 | NA |
| ASV_16s_12952 | 0.220948931 | -0.255788388 | 3.5504662   | 1.260409503 | 0.989468829 | NA |
| ASV_16s_12953 | 0.224246427 | -0.273398252 | 3.550438384 | 1.266416366 | 0.98931643  | NA |
| ASV_16s_12954 | 0.219446755 | -0.294323317 | 3.550468502 | 1.233974882 | 0.990123479 | NA |
| ASV_16s_12955 | 0.216413882 | -0.304467114 | 3.550489864 | 1.213252727 | NA          | NA |
| ASV_16s_12956 | 0.219452459 | -0.308231244 | 3.55046688  | 1.222233522 | 0.990405933 | NA |
| ASV_16s_12957 | 0.216419586 | -0.318695845 | 3.550489052 | 1.200482151 | NA          | NA |
| ASV_16s_12958 | 0.229725955 | -0.361786202 | 3.550397859 | 1.206300834 | 0.990781098 | NA |
| ASV_16s_12959 | 0.297851448 | -0.680242782 | 3.550229429 | 0.822762335 | 0.997204657 | NA |
| ASV_16s_12960 | 0.304220965 | -0.680381617 | 3.550198428 | 0.829560135 | NA          | NA |
| ASV_16s_12961 | 0.216522259 | -0.648337974 | 3.55066981  | 0.717536842 | NA          | NA |
| ASV_16s_12962 | 0.216522259 | -0.648337974 | 3.55066981  | 0.717536842 | NA          | NA |
| ASV_16s_12964 | 0.238228855 | -0.22051058  | 3.55034208  | 1.217819603 | 0.990510801 | NA |
| ASV_16s_12965 | 0.225281503 | -0.126802291 | 3.550446055 | 1.138099299 | 0.992283024 | NA |
| ASV_16s_12966 | 0.224542512 | -0.213166503 | 3.550450946 | 1.041417227 | 0.994132465 | NA |
| ASV_16s_12967 | 0.209729319 | 0.272816516  | 3.551680414 | 0.486485781 | NA          | NA |
| ASV_16s_12968 | 0.230788883 | 0.188151707  | 3.550263787 | 1.265264747 | 0.989345752 | NA |
| ASV_16s_12969 | 0.315771438 | -0.532756417 | 3.55001112  | 1.220815617 | 0.990439699 | NA |
| ASV_16s_12970 | 0.235742429 | 0.058538691  | 3.550304685 | 1.080160019 | 0.993429769 | NA |
| ASV_16s_12971 | 0.22406115  | -0.317475642 | 3.550301351 | 0.805909002 | NA          | NA |
| ASV_16s_12972 | 0.22135719  | 0.325868936  | 3.550513962 | 1.177960839 | 0.991425523 | NA |
| ASV_16s_12973 | 0.194792281 | 0.818974241  | 3.551457889 | 0.648689094 | NA          | NA |
| ASV_16s_12974 | 0.292269844 | -0.490532944 | 3.550308383 | 1.05389231  | 0.993911708 | NA |
| ASV_16s_12975 | 0.229199162 | 0.3224824    | 3.550341602 | 1.239981284 | 0.989977015 | NA |
| ASV_16s_12976 | 0.231585034 | 0.265374118  | 3.550298859 | 1.309708882 | 0.98817777  | NA |
| ASV_16s_12977 | 0.289434836 | -0.720762273 | 3.549976226 | 1.16269242  | 0.991760682 | NA |
| ASV_16s_12978 | 0.24156694  | 0.682369398  | 3.550953451 | 1.016128711 | NA          | NA |
| ASV_16s_12979 | 0.289518096 | -0.713074258 | 3.549976534 | 1.178268362 | 0.991418686 | NA |
| ASV_16s_12980 | 0.290466761 | -0.705178204 | 3.549976783 | 1.195951062 | 0.991019825 | NA |
| ASV_16s_12981 | 0.283555806 | -0.686857247 | 3.550476935 | 0.899410182 | 0.996292209 | NA |
| ASV_16s_12982 | 0.276288858 | 0.331917492  | 3.551705488 | 0.432595671 | NA          | NA |
| ASV_16s_12983 | 0.296991309 | -0.701119695 | 3.549955269 | 1.229553247 | 0.990230446 | NA |
| ASV_16s_12984 | 0.27210749  | -0.669192086 | 3.55008735  | 1.174186183 | 0.99150916  | NA |
| ASV_16s_12985 | 0.275255726 | -0.827580056 | 3.549893164 | 0.854705814 | NA          | NA |
| ASV_16s_12986 | 0.279016139 | -0.665407726 | 3.550063897 | 1.203757007 | 0.990840136 | NA |
| ASV_16s_12987 | 0.250340487 | -0.459254201 | 3.55003513  | 0.865182407 | 0.996720454 | NA |
| ASV_16s_12988 | 0.267261643 | -0.627606204 | 3.55014847  | 1.188521699 | 0.991188786 | NA |
| ASV_16s_12989 | 0.287685359 | -0.603364405 | 3.550134112 | 1.256478268 | 0.989567836 | NA |
| ASV_16s_12990 | 0.274928888 | -0.661864643 | 3.550341674 | 0.963224488 | 0.995400163 | NA |
| ASV_16s_12991 | 0.28002013  | -0.631954789 | 3.550268682 | 1.090393618 | 0.993235664 | NA |
| ASV_16s_12992 | 0.277200629 | -0.531408002 | 3.550310655 | 1.246856808 | NA          | NA |
| ASV_16s_12993 | 0.280296812 | 0.18341446   | 3.549593549 | 1.226751563 | NA          | NA |
| ASV_16s_12994 | 0.214775447 | -0.572828521 | 3.550588317 | 0.918843965 | 0.996033663 | NA |
| ASV_16s_12995 | 0.269710779 | 0.220828249  | 3.549299176 | 1.339152141 | 0.987362523 | NA |
| ASV_16s_12996 | 0.306546669 | 0.75301344   | 3.550060719 | 0.769695415 | NA          | NA |
| ASV_16s_12997 | 0.199245646 | -0.148214144 | 3.550205495 | 0.805395928 | NA          | NA |
| ASV_16s_12998 | 0.330296307 | -0.585655645 | 3.549998411 | 0.861686115 | 0.996762286 | NA |
| ASV_16s_12999 | 0.310278341 | 0.654687032  | 3.550614074 | 0.915421281 | 0.99608002  | NA |
| ASV_16s_13000 | 0.269636809 | 0.297951542  | 3.550548421 | 1.28529918  | NA          | NA |
| ASV_16s_13001 | 0.256590185 | 0.354635177  | 3.551201984 | 0.795782291 | NA          | NA |



|               |             |              |             |             |             |    |
|---------------|-------------|--------------|-------------|-------------|-------------|----|
| ASV_16s_13002 | 0.238131434 | -0.071283014 | 3.550536379 | 1.136226033 | NA          | NA |
| ASV_16s_13003 | 0.285135644 | 1.51416653   | 3.550279845 | 0.441839663 | 0.99963281  | NA |
| ASV_16s_13004 | 0.366580032 | 0.271650901  | 3.550534172 | 0.869823297 | NA          | NA |
| ASV_16s_13005 | 0.366580032 | 0.271650901  | 3.550534172 | 0.869823297 | NA          | NA |
| ASV_16s_13006 | 0.31064407  | -0.592304525 | 3.550693739 | 1.01977364  | NA          | NA |
| ASV_16s_13007 | 0.22517978  | -0.557734957 | 3.550848336 | 0.7188807   | NA          | NA |
| ASV_16s_13008 | 0.295270536 | 1.305308909  | 3.550601715 | 0.774226931 | 0.997698166 | NA |
| ASV_16s_13009 | 0.153611082 | 1.346198606  | 3.551063567 | 0.353085799 | NA          | NA |
| ASV_16s_13010 | 0.255999402 | 1.277587226  | 3.550760955 | 0.724845824 | NA          | NA |
| ASV_16s_13011 | 0.277915347 | 1.748419268  | 3.550422521 | 0.481668449 | 0.999510874 | NA |
| ASV_16s_13012 | 0.205563427 | 1.597616048  | 3.550719044 | 0.38654997  | 0.999765068 | NA |
| ASV_16s_13013 | 0.247476297 | 1.270004637  | 3.550797214 | 0.713015632 | NA          | NA |
| ASV_16s_13014 | 0.234624535 | 0.38382673   | 3.551303794 | 0.725156    | NA          | NA |
| ASV_16s_13015 | 0.234624535 | 0.38382673   | 3.551303794 | 0.725156    | NA          | NA |
| ASV_16s_13016 | 0.416678105 | 0.403318402  | 3.550411186 | 0.913889902 | NA          | NA |
| ASV_16s_13017 | 0.152798707 | -0.456670909 | 3.55118501  | 0.475518741 | NA          | NA |
| ASV_16s_13018 | 0.181820001 | 0.365082507  | 3.551626607 | 0.639360416 | NA          | NA |
| ASV_16s_13019 | 0.209147098 | -0.077943864 | 3.550975454 | 0.999153531 | NA          | NA |
| ASV_16s_13020 | 0.285715328 | -0.019317263 | 3.551328111 | 0.767403023 | 0.99776256  | NA |
| ASV_16s_13021 | 0.213072103 | -1.052011584 | 3.550457886 | 0.378445725 | 0.999781177 | NA |
| ASV_16s_13022 | 0.140508868 | 1.13522914   | 3.551068221 | 0.459692737 | NA          | NA |
| ASV_16s_13023 | 0.244059316 | 0.836436127  | 3.549834352 | 0.929660155 | NA          | NA |
| ASV_16s_13024 | 0.265773621 | 0.416505634  | 3.550786937 | 0.699732971 | 0.998337788 | NA |
| ASV_16s_13025 | 0.18055288  | 0.383447719  | 3.551269706 | 0.570847872 | 0.999143504 | NA |
| ASV_16s_13026 | 0.354639616 | 0.418898287  | 3.550337287 | 0.792747447 | NA          | NA |
| ASV_16s_13027 | 0.22399139  | 0.403178532  | 3.550994188 | 0.642507303 | NA          | NA |
| ASV_16s_13028 | 0.15283915  | -0.510767923 | 3.550739492 | 0.518396914 | NA          | NA |
| ASV_16s_13029 | 0.140073792 | -0.494223813 | 3.550865999 | 0.491275381 | NA          | NA |
| ASV_16s_13030 | 0.140073792 | -0.494223813 | 3.550865999 | 0.491275381 | NA          | NA |
| ASV_16s_13031 | 0.11104167  | 1.057643782  | 3.551242883 | 0.386812906 | NA          | NA |
| ASV_16s_13032 | 0.213850112 | -0.078773397 | 3.550770095 | 0.970368724 | NA          | NA |
| ASV_16s_13033 | 0.146868606 | 0.220081643  | 3.550773719 | 0.627969479 | 0.998830066 | NA |
| ASV_16s_13034 | 0.158886095 | 0.220070345  | 3.550758836 | 0.665055692 | NA          | NA |
| ASV_16s_13035 | 0.272811063 | 0.310936497  | 3.550827974 | 1.073605305 | 0.993552217 | NA |
| ASV_16s_13036 | 0.270858474 | 0.310936609  | 3.550829699 | 1.069974874 | NA          | NA |
| ASV_16s_13037 | 0.167708865 | 0.596039345  | 3.550713764 | 0.624985925 | NA          | NA |
| ASV_16s_13038 | 0.219300813 | -0.067840992 | 3.550668855 | 1.162177497 | NA          | NA |
| ASV_16s_13039 | 0.219300813 | -0.067840992 | 3.550668855 | 1.162177497 | NA          | NA |
| ASV_16s_13040 | 0.197193714 | -0.58949544  | 3.550545462 | 0.878028575 | 0.996563731 | NA |
| ASV_16s_13041 | 0.223760478 | -0.068734    | 3.55045931  | 1.292196161 | NA          | NA |
| ASV_16s_13042 | 0.226693874 | 0.685634605  | 3.551759893 | 0.753570164 | 0.997889423 | NA |
| ASV_16s_13043 | 0.24415543  | -0.062502185 | 3.550618174 | 1.145029494 | 0.992138004 | NA |
| ASV_16s_13044 | 0.228220143 | -0.068246487 | 3.55032124  | 1.325382125 | NA          | NA |
| ASV_16s_13045 | 0.25600975  | 0.905168342  | 3.551493378 | 0.70804529  | NA          | NA |
| ASV_16s_13046 | 0.233239166 | 0.974047071  | 3.550769373 | 0.560491867 | NA          | NA |
| ASV_16s_13047 | 0.218882379 | -0.047985034 | 3.550558765 | 1.018563598 | NA          | NA |
| ASV_16s_13048 | 0.230697735 | -0.067780001 | 3.550370605 | 1.297815799 | NA          | NA |
| ASV_16s_13049 | 0.157014559 | 0.193474825  | 3.550932689 | 0.788161449 | NA          | NA |
| ASV_16s_13050 | 0.202300945 | 1.319877161  | 3.551046863 | 0.551572475 | NA          | NA |
| ASV_16s_13051 | 0.313414878 | 0.695442271  | 3.550883411 | 1.146266844 | 0.992111933 | NA |
| ASV_16s_13052 | 0.195911107 | -0.253172106 | 3.55123299  | 0.637550494 | NA          | NA |
| ASV_16s_13053 | 0.12999843  | 0.281948796  | 3.551675662 | 0.536859588 | NA          | NA |
| ASV_16s_13054 | 0.12999843  | 0.281948796  | 3.551675662 | 0.536859588 | NA          | NA |
| ASV_16s_13055 | 0.064686351 | 0.288840567  | 3.551869198 | 0.333862886 | NA          | NA |
| ASV_16s_13056 | 0.488460474 | -0.566030579 | 3.54951252  | 0.959278002 | NA          | NA |
| ASV_16s_13057 | 0.458894766 | -0.193279173 | 3.549228148 | 1.1888971   | NA          | NA |
| ASV_16s_13058 | 0.39976335  | -0.13145025  | 3.549299065 | 1.554392537 | NA          | NA |
| ASV_16s_13059 | 0.370184725 | 0.402926438  | 3.551196032 | 0.68598397  | 0.998441127 | NA |
| ASV_16s_13060 | 0.281961073 | 0.332165616  | 3.551013171 | 0.6868092   | 0.998435048 | NA |
| ASV_16s_13061 | 0.284041616 | -0.547910498 | 3.54985502  | 0.714751449 | NA          | NA |
| ASV_16s_13062 | 0.314948465 | 1.330597255  | 3.550386612 | 0.734554368 | NA          | NA |
| ASV_16s_13063 | 0.3353668   | 1.520912694  | 3.550134589 | 1.004701891 | 0.994752331 | NA |
| ASV_16s_13064 | 0.1794679   | -0.078608645 | 3.550818876 | 0.88434844  | NA          | NA |
| ASV_16s_13065 | 0.394047302 | -0.101149083 | 3.549340284 | 1.503324849 | NA          | NA |
| ASV_16s_13066 | 0.322097288 | 0.342188495  | 3.549965481 | 1.605501371 | NA          | NA |
| ASV_16s_13067 | 0.331215809 | 0.738212646  | 3.550090868 | 1.346101978 | 0.987165219 | NA |
| ASV_16s_13068 | 0.200501445 | -0.339248948 | 3.550737865 | 0.78426361  | NA          | NA |

|               |             |              |             |             |             |    |
|---------------|-------------|--------------|-------------|-------------|-------------|----|
| ASV_16s_13069 | 0.305200342 | 0.342677535  | 3.550008803 | 1.530027465 | NA          | NA |
| ASV_16s_13070 | 0.197602015 | -0.073619193 | 3.550818367 | 0.955561961 | NA          | NA |
| ASV_16s_13071 | 0.27101043  | 0.34315623   | 3.550160898 | 1.411157345 | NA          | NA |
| ASV_16s_13072 | 0.306448975 | 0.387988113  | 3.550627074 | 1.282465506 | NA          | NA |
| ASV_16s_13073 | 0.233026187 | 0.326386155  | 3.550383874 | 1.27655451  | NA          | NA |
| ASV_16s_13074 | 0.33047435  | 0.343362055  | 3.549999472 | 1.536578485 | NA          | NA |
| ASV_16s_13075 | 0.24077141  | -0.073812311 | 3.55076391  | 1.053661234 | NA          | NA |
| ASV_16s_13076 | 0.319744567 | 0.406257162  | 3.550704066 | 1.253206431 | NA          | NA |
| ASV_16s_13077 | 0.270103391 | 0.360359885  | 3.550970001 | 1.130352065 | NA          | NA |
| ASV_16s_13078 | 0.270058915 | 0.361984091  | 3.551020818 | 1.037098209 | NA          | NA |
| ASV_16s_13079 | 0.308879638 | 0.334247999  | 3.550870425 | 0.961506073 | 0.995425827 | NA |
| ASV_16s_13080 | 0.240112583 | 0.36034557   | 3.551016728 | 1.07098406  | NA          | NA |
| ASV_16s_13081 | 0.240112583 | 0.36034557   | 3.551016728 | 1.07098406  | NA          | NA |
| ASV_16s_13082 | 0.240112583 | 0.36034557   | 3.551016728 | 1.07098406  | NA          | NA |
| ASV_16s_13083 | 0.240112583 | 0.36034557   | 3.551016728 | 1.07098406  | NA          | NA |
| ASV_16s_13084 | 0.240112583 | 0.36034557   | 3.551016728 | 1.07098406  | NA          | NA |
| ASV_16s_13085 | 0.274244003 | 0.31593941   | 3.550849025 | 1.099069606 | 0.993068289 | NA |
| ASV_16s_13086 | 0.259001084 | 0.315939573  | 3.550864365 | 1.07019068  | 0.993615427 | NA |
| ASV_16s_13087 | 0.259001084 | 0.315939573  | 3.550864365 | 1.07019068  | 0.993615427 | NA |
| ASV_16s_13088 | 0.258658888 | 0.315939573  | 3.55086473  | 1.069523335 | 0.993627734 | NA |
| ASV_16s_13089 | 0.25694791  | 0.315939576  | 3.55086657  | 1.066173696 | 0.993689282 | NA |
| ASV_16s_13090 | 0.256263519 | 0.315939577  | 3.550867313 | 1.064827773 | 0.993713906 | NA |
| ASV_16s_13091 | 0.408896402 | 1.067179059  | 3.550476261 | 0.979558858 | NA          | NA |
| ASV_16s_13092 | 0.32294378  | 1.008562503  | 3.550689083 | 0.925567775 | 0.995941565 | NA |
| ASV_16s_13093 | 0.331762222 | 0.734489901  | 3.550900048 | 1.170895231 | NA          | NA |
| ASV_16s_13094 | 0.331762222 | 0.734489901  | 3.550900048 | 1.170895231 | NA          | NA |
| ASV_16s_13095 | 0.331762222 | 0.734489901  | 3.550900048 | 1.170895231 | NA          | NA |
| ASV_16s_13096 | 0.331762222 | 0.734489901  | 3.550900048 | 1.170895231 | NA          | NA |
| ASV_16s_13097 | 0.164340296 | 0.733362897  | 3.5512273   | 0.823958    | NA          | NA |
| ASV_16s_13098 | 0.265185716 | 1.011891855  | 3.55076825  | 0.831026782 | 0.997114271 | NA |
| ASV_16s_13099 | 0.306364105 | 0.693350388  | 3.550794406 | 1.089903748 | 0.993245037 | NA |
| ASV_16s_13100 | 0.314375842 | 0.693371467  | 3.550788256 | 1.102962841 | 0.992992339 | NA |
| ASV_16s_13101 | 0.285728232 | 0.693290719  | 3.550811825 | 1.054697454 | 0.993897281 | NA |
| ASV_16s_13102 | 0.289330091 | 0.693301711  | 3.550808614 | 1.060971865 | 0.993784111 | NA |
| ASV_16s_13103 | 0.294674499 | 0.693317577  | 3.550803982 | 1.070210631 | 0.993615059 | NA |
| ASV_16s_13104 | 0.277271336 | 0.693263706  | 3.550819715 | 1.039529984 | 0.99416541  | NA |
| ASV_16s_13105 | 0.279641769 | 0.693271431  | 3.550817458 | 1.04381127  | 0.994090503 | NA |
| ASV_16s_13106 | 0.314788844 | 0.693372484  | 3.55078796  | 1.103560375 | 0.992980635 | NA |
| ASV_16s_13107 | 0.348223054 | 1.201906473  | 3.550241316 | 0.819823926 | NA          | NA |
| ASV_16s_13108 | 0.212140322 | 0.280877685  | 3.551477841 | 0.691182803 | NA          | NA |
| ASV_16s_13109 | 0.212140322 | 0.280877685  | 3.551477841 | 0.691182803 | NA          | NA |
| ASV_16s_13110 | 0.212140322 | 0.280877685  | 3.551477841 | 0.691182803 | NA          | NA |
| ASV_16s_13111 | 0.212140322 | 0.280877685  | 3.551477841 | 0.691182803 | NA          | NA |
| ASV_16s_13112 | 0.216283023 | -0.072637136 | 3.550657657 | 1.17268243  | NA          | NA |
| ASV_16s_13113 | 0.216283023 | -0.072637136 | 3.550657657 | 1.17268243  | NA          | NA |
| ASV_16s_13114 | 0.216541942 | -0.087550403 | 3.550634505 | 1.187849973 | NA          | NA |
| ASV_16s_13115 | 0.21705978  | -0.116588293 | 3.550593816 | 1.214799226 | 0.990582147 | NA |
| ASV_16s_13116 | 0.21705978  | -0.116588293 | 3.550593816 | 1.214799226 | 0.990582147 | NA |
| ASV_16s_13117 | 0.217318699 | -0.130782259 | 3.550575999 | 1.226592397 | 0.990301669 | NA |
| ASV_16s_13118 | 0.217836536 | -0.15867317  | 3.550544873 | 1.246764642 | 0.989809993 | NA |
| ASV_16s_13119 | 0.212271515 | -0.16182123  | 3.550585821 | 1.229872162 | 0.990222755 | NA |
| ASV_16s_13120 | 0.218095455 | -0.172425185 | 3.550531389 | 1.254086792 | 0.989627782 | NA |
| ASV_16s_13121 | 0.218354374 | -0.186082476 | 3.550519197 | 1.257037083 | 0.989553798 | NA |
| ASV_16s_13122 | 0.218613293 | -0.19966938  | 3.55050824  | 1.258985218 | 0.989504766 | NA |
| ASV_16s_13123 | 0.212288628 | -0.202568645 | 3.550555228 | 1.235114382 | 0.990095796 | NA |
| ASV_16s_13124 | 0.214314346 | -0.205921098 | 3.550537312 | 1.24283088  | 0.98990706  | NA |
| ASV_16s_13125 | 0.219131131 | -0.226811185 | 3.550490027 | 1.25965253  | 0.989487938 | NA |
| ASV_16s_13126 | 0.215332909 | -0.220967165 | 3.550521411 | 1.245986079 | 0.98982925  | NA |
| ASV_16s_13127 | 0.238210828 | -0.29080571  | 3.550342134 | 1.303253963 | 0.988352058 | NA |
| ASV_16s_13128 | 0.238628063 | -0.304065299 | 3.550337587 | 1.299162768 | 0.988461702 | NA |
| ASV_16s_13129 | 0.214872112 | -0.331302855 | 3.550501242 | 1.182063501 | 0.991334034 | NA |
| ASV_16s_13130 | 0.216391401 | -0.333070498 | 3.55048974  | 1.186343055 | 0.991237954 | NA |
| ASV_16s_13131 | 0.232883995 | -0.364895591 | 3.550377475 | 1.214145342 | 0.990597549 | NA |
| ASV_16s_13132 | 0.239687528 | -0.429074065 | 3.550356592 | 1.150174778 | 0.992029234 | NA |
| ASV_16s_13133 | 0.240628428 | -0.59673027  | 3.550479754 | 0.87835787  | 0.996559651 | NA |
| ASV_16s_13134 | 0.075837611 | -0.317804825 | 3.551639605 | 0.38549271  | NA          | NA |
| ASV_16s_13135 | 0.075837611 | -0.317804825 | 3.551639605 | 0.38549271  | NA          | NA |

|               |             |              |             |              |             |    |
|---------------|-------------|--------------|-------------|--------------|-------------|----|
| ASV_16s_13136 | 0.285664637 | -0.679962156 | 3.550292519 | 0.809368304  | 0.997347167 | NA |
| ASV_16s_13137 | 0.222059095 | -0.65288623  | 3.550638968 | 0.725946812  | NA          | NA |
| ASV_16s_13138 | 0.212436933 | -0.644685432 | 3.550693194 | 0.711105869  | NA          | NA |
| ASV_16s_13139 | 0.212436933 | -0.644685432 | 3.550693194 | 0.711105869  | NA          | NA |
| ASV_16s_13140 | 0.212436933 | -0.644685432 | 3.550693194 | 0.711105869  | NA          | NA |
| ASV_16s_13141 | 0.212436933 | -0.644685432 | 3.550693194 | 0.711105869  | NA          | NA |
| ASV_16s_13142 | 0.212436933 | -0.644685432 | 3.550693194 | 0.711105869  | NA          | NA |
| ASV_16s_13143 | 0.067683765 | -0.16898138  | 3.550898648 | 0.335592528  | NA          | NA |
| ASV_16s_13144 | 0.067683765 | -0.16898138  | 3.550898648 | 0.335592528  | NA          | NA |
| ASV_16s_13145 | 0.060035997 | -0.168784756 | 3.550948252 | 0.294992218  | NA          | NA |
| ASV_16s_13146 | 0.072032685 | -0.169076235 | 3.550875107 | 0.357682309  | NA          | NA |
| ASV_16s_13147 | 0.094353508 | 0.220164606  | 3.550883002 | 0.435637123  | NA          | NA |
| ASV_16s_13149 | 0.226171216 | -0.040024007 | 3.550351538 | 1.145112817  | 0.99213625  | NA |
| ASV_16s_13150 | 0.229563265 | -0.009870802 | 3.550492969 | 1.05534195   | 0.993885717 | NA |
| ASV_16s_13151 | 0.275478098 | -0.74893004  | 3.550251725 | 0.89976544   | 0.996287584 | NA |
| ASV_16s_13152 | 0.251427496 | -0.129233597 | 3.549954273 | 1.107655412  | 0.992900097 | NA |
| ASV_16s_13153 | 0.289539483 | -0.026145099 | 3.549684806 | 1.407233822  | NA          | NA |
| ASV_16s_13154 | 0.284530437 | -0.689167651 | 3.550328304 | 1.022589543  | 0.994455858 | NA |
| ASV_16s_13155 | 0.283411667 | -0.750305882 | 3.550072197 | 1.039577942  | 0.994164574 | NA |
| ASV_16s_13156 | 0.287283471 | -0.751208126 | 3.550040784 | 1.064542014  | 0.993719126 | NA |
| ASV_16s_13157 | 0.26013127  | -1.046856643 | 3.550247092 | 0.59581937   | NA          | NA |
| ASV_16s_13158 | 0.233819302 | -0.68982507  | 3.550402873 | 0.972933549  | 0.995253419 | NA |
| ASV_16s_13159 | 0.271153677 | -0.708451566 | 3.550353776 | 0.905736425  | 0.996209285 | NA |
| ASV_16s_13160 | 0.307428176 | -0.756223817 | 3.549893021 | 1.155857111  | 0.991908018 | NA |
| ASV_16s_13161 | 0.276471877 | -0.717077175 | 3.550051751 | 1.105352188  | 0.992945467 | NA |
| ASV_16s_13162 | 0.239354239 | 0.181941655  | 3.55011773  | 1.311479522  | 0.988129683 | NA |
| ASV_16s_13163 | 0.240389914 | 0.093867116  | 3.550043305 | 1.300507395  | 0.988425736 | NA |
| ASV_16s_13164 | 0.401164469 | -1.090286355 | 3.549797488 | 0.760737588  | NA          | NA |
| ASV_16s_13165 | 0.267747466 | -0.687571563 | 3.550097786 | 1.126604394  | 0.99251983  | NA |
| ASV_16s_13166 | 0.273372828 | -0.678716293 | 3.550077063 | 1.16131864   | 0.991790428 | NA |
| ASV_16s_13167 | 0.259592931 | -0.662438257 | 3.550147208 | 1.124004667  | NA          | NA |
| ASV_16s_13168 | 0.239651325 | -0.259830493 | 3.55034472  | 1.014923792  | NA          | NA |
| ASV_16s_13169 | 0.2678711   | -0.639717434 | 3.550130731 | 1.176642852  | NA          | NA |
| ASV_16s_13170 | 0.280964237 | -0.65737152  | 3.550065957 | 1.214996296  | NA          | NA |
| ASV_16s_13171 | 0.256647839 | -1.074597907 | 3.550073592 | 0.731069452  | 0.998085458 | NA |
| ASV_16s_13172 | 0.27890564  | -0.632767856 | 3.550105385 | 1.224130729  | 0.990360638 | NA |
| ASV_16s_13173 | 0.299869352 | -0.16665851  | 3.55045203  | 1.264603822  | NA          | NA |
| ASV_16s_13174 | 0.265050365 | -0.580232376 | 3.513070425 | 1.215917886  | 0.990555762 | NA |
| ASV_16s_13175 | 0.343836143 | -0.601680245 | 3.550159285 | 1.181036753  | NA          | NA |
| ASV_16s_13176 | 0.245622523 | -0.917299842 | 3.550263517 | 0.590694907  | NA          | NA |
| ASV_16s_13177 | 0.268759587 | -0.522091977 | 3.550330947 | 1.206866265  | NA          | NA |
| ASV_16s_13178 | 0.278332326 | -0.526971412 | 3.550857572 | 0.948664841  | NA          | NA |
| ASV_16s_13179 | 0.234784726 | -0.847704341 | 3.550338766 | 0.591441709  | 0.999038034 | NA |
| ASV_16s_13180 | 0.259687434 | -0.906338945 | 3.55016723  | 0.816976529  | NA          | NA |
| ASV_16s_13181 | 0.275564956 | 0.183361688  | 3.549602273 | 1.212825596  | NA          | NA |
| ASV_16s_13182 | 0.187574652 | -0.536101797 | 3.550430473 | 0.582326991  | NA          | NA |
| ASV_16s_13183 | 0.339386886 | 0.51302351   | 3.550196694 | 1.35542289   | NA          | NA |
| ASV_16s_13184 | 0.26166896  | 0.189867078  | 3.549816438 | 1.031560351  | NA          | NA |
| ASV_16s_13185 | 0.292306878 | -0.357474247 | 3.550110215 | 1.196565396  | 0.991005764 | NA |
| ASV_16s_13186 | 0.251169224 | 1.273307105  | 3.550781308 | 0.718156629  | NA          | NA |
| ASV_16s_13187 | 0.295033488 | 1.689393005  | 3.550520392 | 0.549253855  | 0.999245404 | NA |
| ASV_16s_13188 | 0.245572248 | 0.353777216  | 3.551931511 | 0.432302823  | NA          | NA |
| ASV_16s_13189 | 0.213734907 | -0.07336129  | 3.550847893 | 0.988651589  | NA          | NA |
| ASV_16s_13190 | 0.249544765 | 0.174381524  | 3.5507871   | 1.549157173  | 0.980558878 | NA |
| ASV_16s_13191 | 0.178389435 | 0.363315211  | 3.551647706 | 0.63296038   | NA          | NA |
| ASV_16s_13192 | 0.178389435 | 0.363315211  | 3.551647706 | 0.63296038   | NA          | NA |
| ASV_16s_13193 | 0.178389435 | 0.363315211  | 3.551647706 | 0.63296038   | NA          | NA |
| ASV_16s_13194 | 0.263958536 | -28.64611717 | 3.55053027  | -0.368463894 | NA          | NA |
| ASV_16s_13195 | 0.180721812 | -0.469704189 | 3.55117547  | 0.564369385  | NA          | NA |
| ASV_16s_13196 | 0.335872986 | -0.825091126 | 3.549802134 | 0.913017497  | 0.996112366 | NA |
| ASV_16s_13197 | 0.26877575  | -0.168443859 | 3.549979623 | 0.889106973  | 0.996424724 | NA |
| ASV_16s_13198 | 0.266980945 | -0.5593315   | 3.550665934 | 0.864003813  | NA          | NA |
| ASV_16s_13199 | 0.275798373 | 0.835998266  | 3.550307519 | 0.716759686  | NA          | NA |
| ASV_16s_13200 | 0.233199514 | -0.562364717 | 3.550411308 | 0.722577005  | NA          | NA |
| ASV_16s_13201 | 0.14668455  | -0.808302176 | 3.551038311 | 0.313040012  | NA          | NA |
| ASV_16s_13202 | 0.333191014 | 0.545527419  | 3.549266483 | 1.013843744  | 0.994602116 | NA |
| ASV_16s_13203 | 0.137857757 | 1.128945063  | 3.551081617 | 0.453504342  | NA          | NA |

|               |             |              |             |             |             |    |
|---------------|-------------|--------------|-------------|-------------|-------------|----|
| ASV_16s_13204 | 0.158689854 | 1.173328207  | 3.55097648  | 0.499658585 | NA          | NA |
| ASV_16s_13205 | 0.300413593 | -0.006960651 | 3.549811806 | 1.421799176 | 0.984894201 | NA |
| ASV_16s_13206 | 0.246056533 | 0.411463053  | 3.550886181 | 0.674031887 | NA          | NA |
| ASV_16s_13207 | 0.347948303 | 0.418886858  | 3.550364544 | 0.786599343 | NA          | NA |
| ASV_16s_13208 | 0.232586567 | 0.69475566   | 3.550522099 | 1.065455239 | NA          | NA |
| ASV_16s_13209 | 0.343374215 | -0.548731112 | 3.549654608 | 0.775412233 | 0.997686857 | NA |
| ASV_16s_13210 | 0.337750722 | -0.017311546 | 3.549575446 | 1.377804851 | NA          | NA |
| ASV_16s_13211 | 0.13743089  | -0.490283437 | 3.550893719 | 0.485364823 | NA          | NA |
| ASV_16s_13212 | 0.13743089  | -0.490283437 | 3.550893719 | 0.485364823 | NA          | NA |
| ASV_16s_13213 | 0.246056533 | -0.078886527 | 3.550736729 | 1.040300186 | NA          | NA |
| ASV_16s_13214 | 0.209815204 | -0.078757049 | 3.550775003 | 0.960903796 | NA          | NA |
| ASV_16s_13215 | 0.209815204 | -0.078757049 | 3.550775003 | 0.960903796 | NA          | NA |
| ASV_16s_13216 | 0.23736854  | 0.248427147  | 3.550763693 | 1.59789798  | 0.978725645 | NA |
| ASV_16s_13217 | 0.241479053 | 0.150952212  | 3.550776442 | 1.679052704 | 0.975456332 | NA |
| ASV_16s_13218 | 0.145991488 | 0.220082439  | 3.550774906 | 0.625139335 | 0.998847165 | NA |
| ASV_16s_13219 | 0.151826732 | 0.220076669  | 3.550767299 | 0.643509429 | 0.998733314 | NA |
| ASV_16s_13220 | 0.156200165 | 0.220072735  | 3.550761969 | 0.65693388  | NA          | NA |
| ASV_16s_13221 | 0.156050203 | 0.220072752  | 3.550762146 | 0.656478852 | 0.998648244 | NA |
| ASV_16s_13222 | 0.157542411 | 0.289031332  | 3.550744913 | 0.922568691 | 0.995982814 | NA |
| ASV_16s_13223 | 0.251143559 | 0.310937847  | 3.550848622 | 1.031782462 | NA          | NA |
| ASV_16s_13224 | 0.249544895 | 0.310937955  | 3.550850288 | 1.028553315 | 0.994354687 | NA |
| ASV_16s_13225 | 0.232455917 | 0.3109392    | 3.550869501 | 0.992909505 | NA          | NA |
| ASV_16s_13226 | 0.212441828 | -0.187610464 | 3.550516789 | 0.888896061 | NA          | NA |
| ASV_16s_13227 | 0.221212126 | -0.068544345 | 3.55039688  | 1.301951008 | NA          | NA |
| ASV_16s_13228 | 0.221707644 | -0.068493331 | 3.550378838 | 1.307327205 | NA          | NA |
| ASV_16s_13229 | 0.222203162 | -0.068438379 | 3.550364751 | 1.30904581  | NA          | NA |
| ASV_16s_13230 | 0.240617914 | -0.068580874 | 3.550269005 | 1.378316752 | NA          | NA |
| ASV_16s_13231 | 0.226662827 | -0.067651064 | 3.550409642 | 1.273473916 | NA          | NA |
| ASV_16s_13232 | 0.235978581 | -0.067931812 | 3.550325609 | 1.309098115 | NA          | NA |
| ASV_16s_13233 | 0.227653864 | -0.067323135 | 3.550470831 | 1.250985842 | NA          | NA |
| ASV_16s_13234 | 0.127103423 | 0.30263072   | 3.551861106 | 0.316603867 | NA          | NA |
| ASV_16s_13235 | 0.268978372 | 1.120103401  | 3.550818366 | 0.716678764 | NA          | NA |
| ASV_16s_13236 | 0.185018829 | 0.27939603   | 3.551579351 | 0.660745366 | NA          | NA |
| ASV_16s_13237 | 0.176886434 | 0.279164115  | 3.551599893 | 0.644697525 | NA          | NA |
| ASV_16s_13238 | 0.247000099 | -0.188995778 | 3.551188258 | 1.4838765   | 0.98286261  | NA |
| ASV_16s_13239 | 0.147292728 | 0.280705942  | 3.551644681 | 0.579588227 | NA          | NA |
| ASV_16s_13240 | 0.178766514 | -0.503924199 | 3.551219692 | 0.639093635 | NA          | NA |
| ASV_16s_13241 | 0.340474016 | -0.690987443 | 3.549488704 | 0.864281896 | NA          | NA |
| ASV_16s_13242 | 0.27868234  | -0.547819497 | 3.549877365 | 0.708651076 | NA          | NA |
| ASV_16s_13243 | 0.26663618  | 1.100132243  | 3.550320818 | 1.110494548 | NA          | NA |
| ASV_16s_13244 | 0.35674702  | 0.092864337  | 3.550118108 | 1.752634967 | 0.972255948 | NA |
| ASV_16s_13245 | 0.33722073  | 0.743903415  | 3.550888533 | 1.373088348 | NA          | NA |
| ASV_16s_13246 | 0.23231514  | -0.028935106 | 3.550868843 | 1.070692056 | NA          | NA |
| ASV_16s_13247 | 0.23231514  | -0.028935106 | 3.550868843 | 1.070692056 | NA          | NA |
| ASV_16s_13248 | 0.321865558 | 0.352812288  | 3.550200501 | 1.417752069 | 0.985021321 | NA |
| ASV_16s_13249 | 0.324053701 | 0.342996927  | 3.549976502 | 1.553170324 | NA          | NA |
| ASV_16s_13250 | 0.324536653 | 0.347504233  | 3.550137342 | 1.44063714  | NA          | NA |
| ASV_16s_13251 | 0.324939113 | 0.376972351  | 3.550504291 | 1.29787498  | NA          | NA |
| ASV_16s_13252 | 0.265007101 | 0.360357612  | 3.55097721  | 1.120685771 | NA          | NA |
| ASV_16s_13253 | 0.265007101 | 0.360357612  | 3.55097721  | 1.120685771 | NA          | NA |
| ASV_16s_13254 | 0.27807403  | 0.339128363  | 3.55091412  | 0.877612414 | 0.996568883 | NA |
| ASV_16s_13255 | 0.235582157 | 0.360343097  | 3.551024826 | 1.061377073 | NA          | NA |
| ASV_16s_13256 | 0.235582157 | 0.360343097  | 3.551024826 | 1.061377073 | NA          | NA |
| ASV_16s_13257 | 0.273373144 | 0.315939569  | 3.550849866 | 1.097418968 | 0.993100333 | NA |
| ASV_16s_13258 | 0.258576646 | 0.315939587  | 3.550864829 | 1.069310323 | 0.99363166  | NA |
| ASV_16s_13259 | 0.262801979 | 0.315939447  | 3.550860382 | 1.077498951 | 0.993479656 | NA |
| ASV_16s_13260 | 0.262920964 | 0.315939447  | 3.550860258 | 1.077730344 | 0.993475328 | NA |
| ASV_16s_13261 | 0.252558249 | 0.315939595  | 3.550871412 | 1.057443111 | 0.993847921 | NA |
| ASV_16s_13262 | 0.280526405 | 0.315939433  | 3.550843206 | 1.110413749 | 0.992845521 | NA |
| ASV_16s_13263 | 0.246056533 | 0.315939604  | 3.550878887 | 1.044305472 | NA          | NA |
| ASV_16s_13264 | 0.246056533 | 0.315939604  | 3.550878887 | 1.044305472 | NA          | NA |
| ASV_16s_13265 | 0.246056533 | 0.488138635  | 3.55084754  | 1.649117572 | 0.976693957 | NA |
| ASV_16s_13266 | 0.290798462 | 0.626902245  | 3.550800501 | 1.445653549 | 0.984131725 | NA |
| ASV_16s_13267 | 0.426555122 | 0.734738019  | 3.550828194 | 1.298245567 | 0.988486195 | NA |
| ASV_16s_13268 | 0.325502557 | 0.734467572  | 3.550906267 | 1.161211629 | NA          | NA |
| ASV_16s_13269 | 0.161239535 | 0.733320385  | 3.551239718 | 0.815039058 | NA          | NA |
| ASV_16s_13270 | 0.29220266  | 0.693307332  | 3.550806102 | 1.06596274  | 0.993693145 | NA |

|               |             |              |             |             |             |    |
|---------------|-------------|--------------|-------------|-------------|-------------|----|
| ASV_16s_13271 | 0.26345819  | 0.693216193  | 3.550833674 | 1.013846894 | 0.994602063 | NA |
| ASV_16s_13272 | 0.291348444 | 0.69330478   | 3.550806843 | 1.064483415 | 0.993720196 | NA |
| ASV_16s_13273 | 0.294127893 | 0.693313018  | 3.550804449 | 1.069264287 | 0.993632508 | NA |
| ASV_16s_13274 | 0.334400682 | 0.693419928  | 3.550774182 | 1.134168781 | 0.99236452  | NA |
| ASV_16s_13275 | 0.277129403 | 0.69326344   | 3.550819861 | 1.039228029 | 0.99417067  | NA |
| ASV_16s_13276 | 0.279160216 | 0.693270072  | 3.550817923 | 1.042901355 | 0.994106474 | NA |
| ASV_16s_13277 | 0.283787875 | 0.693284833  | 3.550813609 | 1.051176193 | 0.993960214 | NA |
| ASV_16s_13278 | 0.2080607   | 0.281670201  | 3.551501106 | 0.684580048 | NA          | NA |
| ASV_16s_13279 | 0.2080607   | 0.281670201  | 3.551501106 | 0.684580048 | NA          | NA |
| ASV_16s_13280 | 0.2080607   | 0.281670201  | 3.551501106 | 0.684580048 | NA          | NA |
| ASV_16s_13281 | 0.211685564 | -0.046083392 | 3.550738342 | 1.126940732 | NA          | NA |
| ASV_16s_13282 | 0.225445285 | -0.120223999 | 3.550526248 | 1.231291302 | NA          | NA |
| ASV_16s_13283 | 0.212980158 | -0.121839404 | 3.550620626 | 1.202020149 | 0.99088031  | NA |
| ASV_16s_13284 | 0.212980158 | -0.121839404 | 3.550620626 | 1.202020149 | 0.99088031  | NA |
| ASV_16s_13285 | 0.213756915 | -0.164556929 | 3.550571691 | 1.232721785 | 0.990153867 | NA |
| ASV_16s_13286 | 0.220215077 | -0.176099136 | 3.550512747 | 1.25386004  | 0.989633454 | NA |
| ASV_16s_13287 | 0.21274976  | -0.176275674 | 3.550570086 | 1.234396293 | 0.990113247 | NA |
| ASV_16s_13288 | 0.214015834 | -0.17853204  | 3.550558306 | 1.239614497 | 0.989985997 | NA |
| ASV_16s_13289 | 0.214274752 | -0.192420161 | 3.550546262 | 1.242115549 | 0.989924649 | NA |
| ASV_16s_13290 | 0.214274752 | -0.192420161 | 3.550546262 | 1.242115549 | 0.989924649 | NA |
| ASV_16s_13291 | 0.214533671 | -0.206257334 | 3.550535524 | 1.243548957 | 0.989889384 | NA |
| ASV_16s_13292 | 0.210493643 | -0.226896886 | 3.550556718 | 1.226811414 | 0.990296412 | NA |
| ASV_16s_13293 | 0.20821471  | -0.223272306 | 3.550576917 | 1.218437851 | 0.990496156 | NA |
| ASV_16s_13294 | 0.208220414 | -0.237146686 | 3.550570757 | 1.216497357 | 0.990542076 | NA |
| ASV_16s_13295 | 0.215310428 | -0.247763633 | 3.550510829 | 1.241318544 | 0.989944224 | NA |
| ASV_16s_13296 | 0.215310428 | -0.247763633 | 3.550510829 | 1.241318544 | 0.989944224 | NA |
| ASV_16s_13297 | 0.211264695 | -0.255525872 | 3.550539997 | 1.223927871 | 0.990365488 | NA |
| ASV_16s_13298 | 0.208231822 | -0.265070625 | 3.55056198  | 1.208169532 | 0.990737578 | NA |
| ASV_16s_13299 | 0.212789688 | -0.271481542 | 3.550524119 | 1.223222604 | 0.990382336 | NA |
| ASV_16s_13300 | 0.226871374 | -0.344673881 | 3.550415033 | 1.212926991 | 0.990626204 | NA |
| ASV_16s_13301 | 0.074379195 | -0.311194617 | 3.551651399 | 0.380316    | NA          | NA |
| ASV_16s_13302 | 0.074379195 | -0.311194617 | 3.551651399 | 0.380316    | NA          | NA |
| ASV_16s_13303 | 0.074379195 | -0.311194617 | 3.551651399 | 0.380316    | NA          | NA |
| ASV_16s_13304 | 0.278040864 | -0.679338888 | 3.550334031 | 0.800578507 | 0.997438045 | NA |
| ASV_16s_13305 | 0.208351608 | -0.640889846 | 3.550717225 | 0.70454963  | NA          | NA |
| ASV_16s_13306 | 0.208351608 | -0.640889846 | 3.550717225 | 0.70454963  | NA          | NA |
| ASV_16s_13307 | 0.066382154 | -0.168951093 | 3.550906301 | 0.328832285 | NA          | NA |
| ASV_16s_13308 | 0.066382154 | -0.168951093 | 3.550906301 | 0.328832285 | NA          | NA |
| ASV_16s_13309 | 0.068081966 | 0.018778734  | 3.55089233  | 0.526069298 | 0.999345317 | NA |
| ASV_16s_13310 | 0.073411649 | -0.01177595  | 3.550860857 | 0.56461904  | 0.999173795 | NA |
| ASV_16s_13311 | 0.058881458 | -0.168750586 | 3.550956863 | 0.2886545   | NA          | NA |
| ASV_16s_13312 | 0.069994254 | 0.220244958  | 3.550988968 | 0.323779256 | NA          | NA |
| ASV_16s_13313 | 0.092539017 | 0.220169161  | 3.550888991 | 0.427878903 | NA          | NA |
| ASV_16s_13316 | 0.224079759 | -0.260167584 | 3.550654571 | 1.156488082 | 0.991894487 | NA |
| ASV_16s_13317 | 0.240488765 | -0.519992002 | 3.55063531  | 1.070973381 | 0.993600973 | NA |
| ASV_16s_13318 | 0.216220233 | -0.019500223 | 3.550542145 | 1.117873872 | 0.99269659  | NA |
| ASV_16s_13319 | 0.212371071 | -0.388394787 | 3.550605394 | 0.708768859 | NA          | NA |
| ASV_16s_13320 | 0.213184999 | -0.496888791 | 3.550673724 | 1.040129847 | 0.994154951 | NA |
| ASV_16s_13321 | 0.227863774 | -0.243786561 | 3.550946015 | 1.015578968 | 0.994573296 | NA |
| ASV_16s_13322 | 0.245535627 | -0.603367639 | 3.550553303 | 1.057082278 | 0.993854422 | NA |
| ASV_16s_13323 | 0.30998314  | -0.771988929 | 3.549949619 | 1.049179288 | 0.993995719 | NA |
| ASV_16s_13324 | 0.301797327 | -0.979598106 | 3.550208474 | 0.685747875 | NA          | NA |
| ASV_16s_13325 | 0.214852061 | -0.24479314  | 3.550283175 | 0.862752392 | NA          | NA |
| ASV_16s_13326 | 0.254799844 | -0.715691243 | 3.550229745 | 0.991524848 | 0.994964096 | NA |
| ASV_16s_13327 | 0.251765203 | -0.479330546 | 3.55035529  | 1.09953771  | 0.993059185 | NA |
| ASV_16s_13328 | 0.28196838  | -0.72449701  | 3.550022945 | 1.115689913 | 0.99274039  | NA |
| ASV_16s_13329 | 0.220453162 | 0.686810664  | 3.551160835 | 0.967346346 | NA          | NA |
| ASV_16s_13330 | 0.274012767 | -0.696582595 | 3.550060719 | 1.134634752 | 0.992354887 | NA |
| ASV_16s_13331 | 0.297414532 | 0.849854581  | 3.550231994 | 1.239993644 | 0.989976712 | NA |
| ASV_16s_13332 | 0.257984304 | 0.221932609  | 3.550378675 | 1.406656463 | 0.985366511 | NA |
| ASV_16s_13333 | 0.276456101 | -0.680426174 | 3.55006263  | 1.170976478 | NA          | NA |
| ASV_16s_13334 | 0.262262598 | -0.670361324 | 3.550131989 | 1.127638261 | 0.992498722 | NA |
| ASV_16s_13335 | 0.256103368 | -0.670815515 | 3.550165123 | 1.105732678 | 0.992937985 | NA |
| ASV_16s_13336 | 0.26662745  | -0.651278384 | 3.550123472 | 1.161339338 | 0.99178998  | NA |
| ASV_16s_13337 | 0.224846876 | 0.131725544  | 3.550380773 | 1.194696569 | NA          | NA |
| ASV_16s_13338 | 0.276796336 | -0.628994989 | 3.550117339 | 1.215393334 | NA          | NA |
| ASV_16s_13339 | 0.21490838  | -0.575678577 | 3.550514391 | 0.908643955 | NA          | NA |

|               |             |              |             |              |             |    |
|---------------|-------------|--------------|-------------|--------------|-------------|----|
| ASV_16s_13340 | 0.269709543 | -0.597963997 | 3.550187043 | 1.203258321  | 0.990851682 | NA |
| ASV_16s_13341 | 0.269646089 | -0.596472055 | 3.550189794 | 1.200586378  | 0.99091339  | NA |
| ASV_16s_13342 | 0.313788632 | 0.105015802  | 3.550797882 | 1.094329472  | 0.993160056 | NA |
| ASV_16s_13343 | 0.231167278 | 0.91692849   | 3.550272664 | 0.405950982  | 0.999723223 | NA |
| ASV_16s_13344 | 0.271817563 | -0.12870736  | 3.550666395 | 1.21199999   | NA          | NA |
| ASV_16s_13345 | 0.291411514 | -0.55666272  | 3.550223412 | 1.267870346  | NA          | NA |
| ASV_16s_13346 | 0.23800371  | 0.911675072  | 3.55024469  | 0.504572725  | 0.999429565 | NA |
| ASV_16s_13347 | 0.264407501 | -0.436880075 | 3.550459014 | 1.168316525  | 0.9916382   | NA |
| ASV_16s_13348 | 0.2706638   | -0.436885492 | 3.550448929 | 1.185136325  | NA          | NA |
| ASV_16s_13349 | 0.331400722 | 0.498369093  | 3.550246009 | 1.306445599  | NA          | NA |
| ASV_16s_13350 | 0.235454563 | -0.089477394 | 3.550751497 | 1.039722496  | NA          | NA |
| ASV_16s_13351 | 0.316606023 | 0.248831296  | 3.550093628 | 1.498214586  | NA          | NA |
| ASV_16s_13352 | 0.289902169 | 0.131171489  | 3.55072228  | 1.744951226  | 0.972600688 | NA |
| ASV_16s_13353 | 0.237957879 | 1.64036291   | 3.550577981 | 0.386180575  | 0.999765819 | NA |
| ASV_16s_13354 | 0.304120046 | 0.423177151  | 3.551026808 | 0.908855659  | NA          | NA |
| ASV_16s_13355 | 0.316187222 | 0.496445474  | 3.549604624 | 1.406742235  | 0.985363861 | NA |
| ASV_16s_13356 | 0.258596134 | 1.750119018  | 3.55032379  | 0.42405414   | 0.999679804 | NA |
| ASV_16s_13357 | 0.130804269 | 1.305942798  | 3.55124826  | 0.290410838  | NA          | NA |
| ASV_16s_13358 | 0.232604389 | 1.201219351  | 3.55085245  | 0.850649028  | NA          | NA |
| ASV_16s_13359 | 0.238137569 | 1.261011995  | 3.550837953 | 0.699540112  | NA          | NA |
| ASV_16s_13360 | 0.235227736 | 1.025740881  | 3.550678176 | 1.085453548  | NA          | NA |
| ASV_16s_13361 | 0.254704331 | 0.388288538  | 3.551184664 | 0.752608592  | NA          | NA |
| ASV_16s_13362 | 0.273323065 | 0.392876074  | 3.55107628  | 0.77621301   | NA          | NA |
| ASV_16s_13363 | 0.236898211 | 0.384254948  | 3.551290274 | 0.72833503   | NA          | NA |
| ASV_16s_13364 | 0.265212226 | -0.564857165 | 3.550639075 | 0.862382647  | NA          | NA |
| ASV_16s_13365 | 0.251533653 | -0.562936329 | 3.550286986 | 0.746493785  | NA          | NA |
| ASV_16s_13366 | 0.251533653 | -0.562936329 | 3.550286986 | 0.746493785  | NA          | NA |
| ASV_16s_13367 | 0.257048935 | -0.563072027 | 3.550252943 | 0.753381114  | NA          | NA |
| ASV_16s_13368 | 0.207309874 | -18.84198888 | 3.551644044 | -0.606274032 | NA          | NA |
| ASV_16s_13369 | 0.315137802 | 1.314509223  | 3.550525965 | 0.796081401  | NA          | NA |
| ASV_16s_13370 | 0.315137802 | 1.314509223  | 3.550525965 | 0.796081401  | NA          | NA |
| ASV_16s_13371 | 0.195357578 | 1.513581902  | 3.550761582 | 0.385635476  | NA          | NA |
| ASV_16s_13372 | 0.273418531 | 0.906100317  | 3.550201594 | 1.275251741  | 0.989089804 | NA |
| ASV_16s_13373 | 0.260991328 | 0.415592043  | 3.550812529 | 0.693675835  | NA          | NA |
| ASV_16s_13374 | 0.215538885 | 0.399777959  | 3.551040983 | 0.629599074  | NA          | NA |
| ASV_16s_13375 | 0.215538885 | 0.399777959  | 3.551040983 | 0.629599074  | NA          | NA |
| ASV_16s_13376 | 0.189984291 | 0.18272724   | 3.550341434 | 1.154015351  | 0.991947433 | NA |
| ASV_16s_13377 | 0.330555624 | -0.225982423 | 3.549630505 | 1.418809811  | 0.98498816  | NA |
| ASV_16s_13378 | 0.121098733 | -0.459199553 | 3.551059377 | 0.446539359  | NA          | NA |
| ASV_16s_13379 | 0.121098733 | -0.459199553 | 3.551059377 | 0.446539359  | NA          | NA |
| ASV_16s_13380 | 0.147071635 | -0.503517938 | 3.55079465  | 0.506317591  | NA          | NA |
| ASV_16s_13381 | 0.134787989 | -0.485666721 | 3.550919946 | 0.479287327  | NA          | NA |
| ASV_16s_13382 | 0.205780296 | -0.078740035 | 3.550780102 | 0.951268954  | NA          | NA |
| ASV_16s_13383 | 0.215794458 | 0.102789149  | 3.550786948 | 1.585127965  | 0.97921536  | NA |
| ASV_16s_13384 | 0.156719143 | 0.383131906  | 3.550736001 | 1.057064353  | 0.993854745 | NA |
| ASV_16s_13385 | 0.161380229 | 0.596023093  | 3.550720183 | 0.606962681  | NA          | NA |
| ASV_16s_13386 | 0.20659183  | 0.369299688  | 3.551534095 | 0.494218363  | NA          | NA |
| ASV_16s_13387 | 0.309932939 | 2.026905897  | 3.549924377 | 0.344109925  | NA          | NA |
| ASV_16s_13388 | 0.212222035 | -0.068362721 | 3.550644989 | 1.174023239  | NA          | NA |
| ASV_16s_13389 | 0.22142767  | -0.06889861  | 3.550531627 | 1.266261664  | 0.989320372 | NA |
| ASV_16s_13390 | 0.309099412 | 0.157261579  | 3.549603092 | 1.004549513  | NA          | NA |
| ASV_16s_13391 | 0.233711153 | -0.068439226 | 3.550292657 | 1.345480917  | 0.987182927 | NA |
| ASV_16s_13392 | 0.24535493  | 0.37801089   | 3.551521991 | 0.59236956   | NA          | NA |
| ASV_16s_13393 | 0.257457316 | 0.344965071  | 3.551946263 | 0.520932762  | 0.999366167 | NA |
| ASV_16s_13394 | 0.23136006  | -0.067097876 | 3.55046704  | 1.242762494  | NA          | NA |
| ASV_16s_13395 | 0.231338037 | -0.063249536 | 3.55050331  | 1.226723104  | NA          | NA |
| ASV_16s_13396 | 0.253038833 | 0.320826688  | 3.551045149 | 0.82298016   | 0.997202299 | NA |
| ASV_16s_13397 | 0.289903153 | 0.69460307   | 3.550867337 | 1.092514793  | 0.993194982 | NA |
| ASV_16s_13398 | 0.410896587 | -0.153200577 | 3.549091756 | 1.385182601  | NA          | NA |
| ASV_16s_13399 | 0.273323065 | -0.547726255 | 3.549900579 | 0.702442156  | NA          | NA |
| ASV_16s_13400 | 0.279637126 | 1.120298183  | 3.550255013 | 1.149576182  | 0.992041937 | NA |
| ASV_16s_13401 | 0.477895665 | -0.029479155 | 3.550689568 | 1.435385394  | NA          | NA |
| ASV_16s_13402 | 0.401905739 | 0.407224497  | 3.550226932 | 1.713795366  | 0.973973316 | NA |
| ASV_16s_13403 | 0.295035961 | 0.379817032  | 3.550491522 | 1.270983382  | 0.989199654 | NA |
| ASV_16s_13404 | 0.288021746 | 0.13449394   | 3.550084813 | 1.510284585  | 0.981951471 | NA |
| ASV_16s_13405 | 0.267328528 | 0.326117583  | 3.550310711 | 1.379852067  | 0.986180398 | NA |
| ASV_16s_13406 | 0.186728741 | -0.073557197 | 3.550836051 | 0.927776136  | NA          | NA |

|               |             |              |             |             |             |    |
|---------------|-------------|--------------|-------------|-------------|-------------|----|
| ASV_16s_13407 | 0.233498442 | 0.332955429  | 3.550299803 | 1.297025161 | NA          | NA |
| ASV_16s_13408 | 0.286623545 | 0.343413787  | 3.550135315 | 1.424753648 | NA          | NA |
| ASV_16s_13409 | 0.259910811 | 0.36035533   | 3.550984701 | 1.110836362 | NA          | NA |
| ASV_16s_13410 | 0.259910811 | 0.36035533   | 3.550984701 | 1.110836362 | NA          | NA |
| ASV_16s_13411 | 0.383648693 | 0.363403793  | 3.550453895 | 0.961163264 | 0.995430935 | NA |
| ASV_16s_13412 | 0.239713234 | 0.334257576  | 3.550971386 | 0.851922791 | NA          | NA |
| ASV_16s_13413 | 0.231051731 | 0.360340459  | 3.551033238 | 1.051591681 | NA          | NA |
| ASV_16s_13414 | 0.231051731 | 0.360340459  | 3.551033238 | 1.051591681 | NA          | NA |
| ASV_16s_13415 | 0.279470408 | 0.575442564  | 3.550920329 | 1.787478824 | 0.970661718 | NA |
| ASV_16s_13416 | 0.299372475 | 0.315939552  | 3.550827143 | 1.143374723 | NA          | NA |
| ASV_16s_13417 | 0.270917672 | 0.315939583  | 3.550852244 | 1.092818844 | 0.993189138 | NA |
| ASV_16s_13418 | 0.26977948  | 0.315939584  | 3.550853358 | 1.090690688 | 0.993229976 | NA |
| ASV_16s_13419 | 0.273781602 | 0.315939462  | 3.55084948  | 1.098144633 | 0.993086257 | NA |
| ASV_16s_13420 | 0.265226711 | 0.31593959   | 3.550857907 | 1.082089425 | 0.993393447 | NA |
| ASV_16s_13421 | 0.348290412 | 0.769717739  | 3.550186106 | 1.682562618 | 0.975308786 | NA |
| ASV_16s_13422 | 0.258776653 | 0.315939598  | 3.55086462  | 1.069678894 | NA          | NA |
| ASV_16s_13423 | 0.241324676 | 0.315939624  | 3.550884589 | 1.034498177 | NA          | NA |
| ASV_16s_13424 | 0.267631955 | 0.478189387  | 3.550827089 | 1.71788906  | 0.973795268 | NA |
| ASV_16s_13425 | 0.343675144 | 1.564067174  | 3.550354152 | 0.69080665  | NA          | NA |
| ASV_16s_13426 | 0.311287909 | 1.153912636  | 3.550500383 | 0.847122631 | 0.996932785 | NA |
| ASV_16s_13427 | 0.319242892 | 0.734445389  | 3.550912731 | 1.151342072 | NA          | NA |
| ASV_16s_13428 | 0.158138775 | 0.733276216  | 3.551252619 | 0.806000947 | NA          | NA |
| ASV_16s_13429 | 0.302406674 | 0.693339914  | 3.550797575 | 1.083266784 | 0.99337122  | NA |
| ASV_16s_13430 | 0.273759064 | 0.693249509  | 3.550823139 | 1.033077247 | 0.994277161 | NA |
| ASV_16s_13431 | 0.274089312 | 0.693250625  | 3.550822814 | 1.033683175 | 0.994266726 | NA |
| ASV_16s_13432 | 0.254113936 | 0.693181172  | 3.550843982 | 0.995690721 | 0.994897752 | NA |
| ASV_16s_13433 | 0.305213781 | 0.693347612  | 3.550795327 | 1.087935281 | NA          | NA |
| ASV_16s_13434 | 0.271390137 | 0.693244365  | 3.550825495 | 1.028703058 | 0.994352132 | NA |
| ASV_16s_13435 | 0.241324676 | 0.69312864   | 3.550859362 | 0.969880807 | NA          | NA |
| ASV_16s_13436 | 0.241324676 | 0.69312864   | 3.550859362 | 0.969880807 | NA          | NA |
| ASV_16s_13437 | 0.241324676 | 0.69312864   | 3.550859362 | 0.969880807 | NA          | NA |
| ASV_16s_13438 | 0.203981079 | 0.282704689  | 3.551523034 | 0.677840307 | NA          | NA |
| ASV_16s_13439 | 0.203981079 | 0.282704689  | 3.551523034 | 0.677840307 | NA          | NA |
| ASV_16s_13440 | 0.203981079 | 0.282704689  | 3.551523034 | 0.677840307 | NA          | NA |
| ASV_16s_13441 | 0.207088105 | -0.017215122 | 3.550832116 | 1.075820726 | NA          | NA |
| ASV_16s_13442 | 0.224397165 | -0.091156673 | 3.550568973 | 1.19702149  | NA          | NA |
| ASV_16s_13443 | 0.207864861 | -0.06647163  | 3.550739004 | 1.133108619 | NA          | NA |
| ASV_16s_13444 | 0.20812378  | -0.082099133 | 3.550713216 | 1.148954759 | NA          | NA |
| ASV_16s_13445 | 0.20812378  | -0.082099133 | 3.550713216 | 1.148954759 | NA          | NA |
| ASV_16s_13446 | 0.208382699 | -0.097414158 | 3.550689652 | 1.163404154 | NA          | NA |
| ASV_16s_13447 | 0.208382699 | -0.097414158 | 3.550689652 | 1.163404154 | NA          | NA |
| ASV_16s_13448 | 0.214917112 | -0.139524821 | 3.55058615  | 1.211891494 | 0.990650516 | NA |
| ASV_16s_13449 | 0.204089456 | -0.116848102 | 3.55070246  | 1.17085469  | 0.991582552 | NA |
| ASV_16s_13450 | 0.208900537 | -0.127271422 | 3.550648486 | 1.188927761 | 0.991179603 | NA |
| ASV_16s_13451 | 0.207133737 | -0.137756829 | 3.55065204  | 1.192622201 | 0.991095779 | NA |
| ASV_16s_13452 | 0.209159456 | -0.141886855 | 3.550630594 | 1.199892179 | 0.99092938  | NA |
| ASV_16s_13453 | 0.209418374 | -0.156337546 | 3.550614338 | 1.209554309 | 0.990705246 | NA |
| ASV_16s_13454 | 0.209418374 | -0.156337546 | 3.550614338 | 1.209554309 | 0.990705246 | NA |
| ASV_16s_13455 | 0.204100864 | -0.145780449 | 3.550669946 | 1.191575076 | 0.991119588 | NA |
| ASV_16s_13456 | 0.204106568 | -0.160053471 | 3.550656047 | 1.19775897  | 0.990978405 | NA |
| ASV_16s_13457 | 0.206897635 | -0.179396405 | 3.550615695 | 1.211751318 | 0.990653805 | NA |
| ASV_16s_13458 | 0.210195131 | -0.198996609 | 3.550574503 | 1.226776109 | 0.990297259 | NA |
| ASV_16s_13459 | 0.219614961 | -0.214342755 | 3.55049278  | 1.255775741 | 0.989585468 | NA |
| ASV_16s_13460 | 0.20412368  | -0.202435448 | 3.550622912 | 1.203388393 | 0.990848671 | NA |
| ASV_16s_13461 | 0.223629293 | -0.246372916 | 3.550450166 | 1.267226004 | 0.989295785 | NA |
| ASV_16s_13462 | 0.208940465 | -0.224411853 | 3.550570556 | 1.221009636 | 0.990435083 | NA |
| ASV_16s_13463 | 0.210712969 | -0.227219354 | 3.550554928 | 1.227502241 | 0.990279817 | NA |
| ASV_16s_13464 | 0.204135088 | -0.230689589 | 3.550607707 | 1.201555732 | 0.990891033 | NA |
| ASV_16s_13465 | 0.211489725 | -0.269639537 | 3.550534955 | 1.218890641 | 0.990485421 | NA |
| ASV_16s_13466 | 0.20642543  | -0.262449142 | 3.550577578 | 1.2019803   | 0.99088123  | NA |
| ASV_16s_13467 | 0.211748644 | -0.284156954 | 3.550529282 | 1.209860225 | 0.990698093 | NA |
| ASV_16s_13468 | 0.207443993 | -0.278209029 | 3.550565291 | 1.196033648 | 0.991017936 | NA |
| ASV_16s_13469 | 0.224700304 | -0.342326673 | 3.550430037 | 1.207135355 | 0.990761679 | NA |
| ASV_16s_13470 | 0.244766754 | -0.362559043 | 3.550302534 | 1.259540241 | 0.989490771 | NA |
| ASV_16s_13471 | 0.209492527 | -0.339837362 | 3.55054467  | 1.151987167 | 0.991990697 | NA |
| ASV_16s_13472 | 0.229120229 | -0.361126944 | 3.550402203 | 1.204521481 | 0.990822419 | NA |
| ASV_16s_13473 | 0.209503935 | -0.370693329 | 3.550550782 | 1.118906598 | 0.99267582  | NA |

|               |             |              |             |              |             |    |
|---------------|-------------|--------------|-------------|--------------|-------------|----|
| ASV_16s_13474 | 0.209256425 | -0.386368564 | 3.550558016 | 1.099672729  | 0.993056558 | NA |
| ASV_16s_13475 | 0.07292078  | -0.304594841 | 3.551662066 | 0.375078246  | NA          | NA |
| ASV_16s_13476 | 0.295848338 | -0.680197238 | 3.550239719 | 0.820510963  | 0.997228954 | NA |
| ASV_16s_13477 | 0.266239705 | -0.677484606 | 3.550400723 | 0.786452685  | 0.997579762 | NA |
| ASV_16s_13478 | 0.27528602  | -0.678993296 | 3.550349285 | 0.79734853   | 0.997470918 | NA |
| ASV_16s_13479 | 0.274822375 | -0.678935369 | 3.550351881 | 0.796801859  | 0.997476455 | NA |
| ASV_16s_13480 | 0.216927021 | -0.648640735 | 3.550667738 | 0.718068608  | NA          | NA |
| ASV_16s_13481 | 0.204266282 | -0.637019655 | 3.550742085 | 0.697874219  | NA          | NA |
| ASV_16s_13482 | 0.204266282 | -0.637019655 | 3.550742085 | 0.697874219  | NA          | NA |
| ASV_16s_13483 | 0.204266282 | -0.637019655 | 3.550742085 | 0.697874219  | NA          | NA |
| ASV_16s_13484 | 0.204266282 | -0.637019655 | 3.550742085 | 0.697874219  | NA          | NA |
| ASV_16s_13485 | 0.227775271 | -0.657426849 | 3.550608744 | 0.734343535  | NA          | NA |
| ASV_16s_13486 | 0.065080543 | -0.168919575 | 3.550914259 | 0.322000971  | NA          | NA |
| ASV_16s_13487 | 0.068621817 | 0.220251175  | 3.550997172 | 0.316872481  | NA          | NA |
| ASV_16s_13488 | 0.08895631  | 0.220178588  | 3.550901523 | 0.412330381  | 0.999708416 | NA |
| ASV_16s_13489 | 0.090724527 | 0.220173895  | 3.550895219 | 0.420040996  | NA          | NA |
| ASV_16s_13490 | 0.216829364 | -0.305142782 | 3.550740459 | 0.694765897  | NA          | NA |
| ASV_16s_13491 | 0.244355832 | 0.219067641  | 3.550624793 | 1.174653021  | 0.991498844 | NA |
| ASV_16s_13492 | 0.216726747 | -0.297554044 | 3.550881192 | 1.018687985  | 0.994521414 | NA |
| ASV_16s_13493 | 0.236593234 | 0.231156073  | 3.550208709 | 1.291497924  | 0.988665404 | NA |
| ASV_16s_13494 | 0.219939214 | 0.238708476  | 3.550188995 | 0.899483911  | 0.996291249 | NA |
| ASV_16s_13495 | 0.251296365 | -0.706978498 | 3.550240859 | 0.99244398   | NA          | NA |
| ASV_16s_13496 | 0.209800738 | -0.076695713 | 3.551323571 | 0.968636526  | NA          | NA |
| ASV_16s_13497 | 0.194217617 | 0.117498112  | 3.550762046 | 1.18814012   | 0.99119741  | NA |
| ASV_16s_13498 | 0.22837445  | 0.361170271  | 3.550375006 | 0.978953999  | 0.99516093  | NA |
| ASV_16s_13499 | 0.263477612 | -0.628149914 | 3.550440268 | 1.045153088  | 0.9940669   | NA |
| ASV_16s_13500 | 0.222183771 | 0.312732716  | 3.550510634 | 1.07038484   | 0.993611843 | NA |
| ASV_16s_13501 | 0.262978007 | -0.712950673 | 3.550148876 | 1.056368841  | 0.993867264 | NA |
| ASV_16s_13502 | 0.26928422  | -0.705873604 | 3.55009066  | 1.092306361  | 0.993198986 | NA |
| ASV_16s_13503 | 0.255672139 | 0.687486927  | 3.550932377 | 1.086693886  | NA          | NA |
| ASV_16s_13504 | 0.221488376 | -0.596354205 | 3.550451779 | 0.722105502  | NA          | NA |
| ASV_16s_13505 | 0.263933291 | -0.642560984 | 3.550142357 | 1.1558704    | NA          | NA |
| ASV_16s_13506 | 0.241209572 | -0.627614596 | 3.550256775 | 1.086912507  | NA          | NA |
| ASV_16s_13507 | 0.274408769 | -0.163992111 | 3.550110655 | 1.185984034  | NA          | NA |
| ASV_16s_13508 | 0.264631642 | -0.650081552 | 3.550132731 | 1.155468447  | 0.991916346 | NA |
| ASV_16s_13509 | 0.263199282 | -0.617178983 | 3.550176507 | 1.172559911  | 0.991545036 | NA |
| ASV_16s_13510 | 0.262949314 | -0.590715862 | 3.55021791  | 1.182093205  | 0.99133337  | NA |
| ASV_16s_13511 | 0.292289439 | 1.236957405  | 3.550054327 | 0.96647163   | NA          | NA |
| ASV_16s_13512 | 0.26555986  | -0.554882953 | 3.550278662 | 1.19232664   | NA          | NA |
| ASV_16s_13513 | 0.274461639 | -0.562486635 | 3.550243284 | 1.217320473  | 0.990522614 | NA |
| ASV_16s_13514 | 0.263733254 | -0.543490253 | 3.550303083 | 1.185540971  | 0.991256012 | NA |
| ASV_16s_13515 | 0.259139964 | 0.373683685  | 3.550525765 | 0.997746177  | 0.994864812 | NA |
| ASV_16s_13516 | 0.263793896 | -0.477788342 | 3.550706874 | 1.047502928  | NA          | NA |
| ASV_16s_13517 | 0.255945905 | -0.417048015 | 3.550500894 | 1.147751486  | NA          | NA |
| ASV_16s_13518 | 0.264261487 | -0.431265381 | 3.550467005 | 1.167083556  | NA          | NA |
| ASV_16s_13519 | 0.329451546 | 0.362099803  | 3.550941968 | 1.223331302  | 0.99037974  | NA |
| ASV_16s_13520 | 0.272232106 | -0.942987595 | 3.550111478 | 0.950007455  | NA          | NA |
| ASV_16s_13521 | 0.235412432 | -0.485114509 | 3.550519975 | 1.186251635  | 0.991240013 | NA |
| ASV_16s_13522 | 0.270261241 | 0.037430786  | 3.550575551 | 1.120151589  | 0.992650732 | NA |
| ASV_16s_13523 | 0.248925725 | -0.243291665 | 3.551245939 | 0.751811969  | NA          | NA |
| ASV_16s_13524 | 0.261984512 | 1.062627034  | 3.550715623 | 0.617424955  | 0.99889292  | NA |
| ASV_16s_13525 | 0.40944563  | -0.591048814 | 3.549703198 | 0.952173362  | NA          | NA |
| ASV_16s_13526 | 0.24788611  | 0.165672127  | 3.550724317 | 1.029875729  | 0.994332095 | NA |
| ASV_16s_13527 | 0.247706792 | 0.35284287   | 3.551331684 | 0.735755873  | NA          | NA |
| ASV_16s_13528 | 0.283651669 | -0.105852798 | 3.550749787 | 1.168135647  | 0.991642157 | NA |
| ASV_16s_13529 | 0.23479533  | -0.07329775  | 3.550790101 | 1.051602695  | 0.993952614 | NA |
| ASV_16s_13530 | 0.233953533 | 1.145905799  | 3.550647616 | 0.614844871  | NA          | NA |
| ASV_16s_13531 | 0.23829102  | 0.356359882  | 3.551173295 | 0.819659522  | NA          | NA |
| ASV_16s_13532 | 0.262667512 | 0.218824447  | 3.550284315 | 0.647403534  | NA          | NA |
| ASV_16s_13533 | 0.252180778 | 1.456601927  | 3.550430065 | 0.401210331  | 0.999733885 | NA |
| ASV_16s_13534 | 0.266709385 | 0.160135168  | 3.551273522 | 0.24640115   | 0.999948715 | NA |
| ASV_16s_13535 | 0.272084435 | 0.35195638   | 3.550367356 | 1.287808784  | 0.988762653 | NA |
| ASV_16s_13536 | 0.156047805 | -0.087016303 | 3.550739466 | 0.61483101   | 0.998908027 | NA |
| ASV_16s_13537 | 0.272619167 | 0.402968948  | 3.55129505  | -0.238633323 | NA          | NA |
| ASV_16s_13538 | 0.345631088 | 0.271666765  | 3.550631921 | 0.85080697   | NA          | NA |
| ASV_16s_13539 | 0.327869251 | 0.969627209  | 3.549578809 | 0.994302944  | 0.994919915 | NA |
| ASV_16s_13540 | 0.233468205 | 1.256018395  | 3.550857613 | 0.692580313  | NA          | NA |



|               |             |              |             |             |             |    |
|---------------|-------------|--------------|-------------|-------------|-------------|----|
| ASV_16s_13541 | 0.233468205 | 1.256018395  | 3.550857613 | 0.692580313 | NA          | NA |
| ASV_16s_13542 | 0.233468205 | 1.256018395  | 3.550857613 | 0.692580313 | NA          | NA |
| ASV_16s_13543 | 0.260395245 | 0.354125298  | 3.551790195 | 0.427206916 | NA          | NA |
| ASV_16s_13544 | 0.267963789 | 0.391841703  | 3.551108706 | 0.769617258 | NA          | NA |
| ASV_16s_13545 | 0.288133675 | 0.472051832  | 3.550407853 | 1.101049698 | NA          | NA |
| ASV_16s_13546 | 0.232253148 | 0.383361373  | 3.551318603 | 0.721650207 | NA          | NA |
| ASV_16s_13547 | 0.310546302 | 0.067497746  | 3.551445898 | 0.702380166 | NA          | NA |
| ASV_16s_13548 | 0.24660162  | -0.562809485 | 3.550318811 | 0.740183102 | NA          | NA |
| ASV_16s_13549 | 0.24660162  | -0.562809485 | 3.550318811 | 0.740183102 | NA          | NA |
| ASV_16s_13550 | 0.17130724  | -0.525149393 | 3.550902086 | 0.622366324 | NA          | NA |
| ASV_16s_13551 | 0.235134174 | -0.553539298 | 3.550772414 | 0.748406587 | NA          | NA |
| ASV_16s_13552 | 0.132555536 | 1.115975281  | 3.551109591 | 0.440854362 | NA          | NA |
| ASV_16s_13553 | 0.28724598  | 0.418505993  | 3.550644012 | 0.722866587 | NA          | NA |
| ASV_16s_13554 | 0.196721558 | -0.049196406 | 3.551008202 | 0.726001953 | NA          | NA |
| ASV_16s_13555 | 0.196498491 | 0.267905935  | 3.550874006 | 0.828746422 | NA          | NA |
| ASV_16s_13556 | 0.252875217 | -0.145525949 | 3.549908478 | 1.277707704 | 0.989026287 | NA |
| ASV_16s_13557 | 0.073577257 | 0.342971959  | 3.55177926  | 0.307038116 | NA          | NA |
| ASV_16s_13558 | 0.227437667 | 0.121785361  | 3.550304277 | 1.109742216 | NA          | NA |
| ASV_16s_13559 | 0.118724248 | -0.454118546 | 3.551082957 | 0.440581636 | NA          | NA |
| ASV_16s_13560 | 0.144187877 | -0.49978818  | 3.550823654 | 0.500149261 | NA          | NA |
| ASV_16s_13561 | 0.215201477 | -0.078777051 | 3.550768519 | 0.973371389 | 0.995246731 | NA |
| ASV_16s_13562 | 0.140702698 | 0.220088137  | 3.550782356 | 0.607946755 | 0.998947447 | NA |
| ASV_16s_13563 | 0.144674688 | 0.220083868  | 3.550776719 | 0.620846945 | 0.998872777 | NA |
| ASV_16s_13564 | 0.150192466 | 0.22007838   | 3.550769382 | 0.638353074 | NA          | NA |
| ASV_16s_13565 | 0.149892543 | 0.220078673  | 3.550769767 | 0.637414172 | NA          | NA |
| ASV_16s_13566 | 0.149892543 | 0.220078673  | 3.550769767 | 0.637414172 | NA          | NA |
| ASV_16s_13567 | 0.255754045 | 0.310937464  | 3.550843952 | 1.040877526 | 0.994141899 | NA |
| ASV_16s_13568 | 0.158215911 | 0.596014472  | 3.550723585 | 0.597757872 | NA          | NA |
| ASV_16s_13569 | 0.320012551 | 0.100815873  | 3.550409632 | 0.721976332 | NA          | NA |
| ASV_16s_13570 | 0.210664718 | -0.068793618 | 3.550563897 | 1.229634479 | NA          | NA |
| ASV_16s_13571 | 0.210664718 | -0.068793618 | 3.550563897 | 1.229634479 | NA          | NA |
| ASV_16s_13572 | 0.261292258 | 1.569956388  | 3.550765056 | 0.407111801 | 0.999720568 | NA |
| ASV_16s_13573 | 0.205267768 | -0.071485512 | 3.551121953 | 0.980659375 | NA          | NA |
| ASV_16s_13574 | 0.251275285 | 1.770111608  | 3.550535739 | 0.302684451 | 0.999896901 | NA |
| ASV_16s_13575 | 0.231154202 | -0.068465979 | 3.550308815 | 1.335640502 | NA          | NA |
| ASV_16s_13576 | 0.168593262 | 0.319788607  | 3.551714479 | 0.352523437 | 0.999827581 | NA |
| ASV_16s_13577 | 0.229389594 | -0.546716415 | 3.550650298 | 0.759160657 | NA          | NA |
| ASV_16s_13578 | 0.204070974 | -0.040548185 | 3.550381224 | 0.902240489 | NA          | NA |
| ASV_16s_13579 | 0.226917728 | -0.067924826 | 3.550360906 | 1.280483174 | NA          | NA |
| ASV_16s_13580 | 0.191987626 | 0.040297677  | 3.550912231 | 0.925028478 | NA          | NA |
| ASV_16s_13581 | 0.16852313  | 0.289878883  | 3.551838087 | 0.413476349 | NA          | NA |
| ASV_16s_13582 | 0.197261786 | 0.604550387  | 3.551139792 | 0.709625869 | 0.998260678 | NA |
| ASV_16s_13583 | 0.320300129 | 0.342446086  | 3.550699519 | 1.136479102 | NA          | NA |
| ASV_16s_13584 | 0.227528456 | 0.107083643  | 3.55100862  | 1.061144546 | NA          | NA |
| ASV_16s_13585 | 0.101001068 | 0.284416303  | 3.551743131 | 0.45615558  | NA          | NA |
| ASV_16s_13586 | 0.385622173 | 0.971027004  | 3.549028115 | 0.899030457 | 0.996297148 | NA |
| ASV_16s_13587 | 0.261702532 | 0.180516842  | 3.550933563 | 0.861380923 | 0.996765921 | NA |
| ASV_16s_13588 | 0.302665314 | 0.707653752  | 3.550810513 | 1.034806201 | NA          | NA |
| ASV_16s_13589 | 0.16930934  | -0.07854802  | 3.550837089 | 0.856083523 | NA          | NA |
| ASV_16s_13590 | 0.16930934  | -0.07854802  | 3.550837089 | 0.856083523 | NA          | NA |
| ASV_16s_13591 | 0.194627318 | -0.117010421 | 3.55038662  | 1.112847501 | NA          | NA |
| ASV_16s_13592 | 0.220444785 | -0.086271588 | 3.550645277 | 1.124595084 | NA          | NA |
| ASV_16s_13593 | 0.364354645 | 0.535744648  | 3.549992887 | 1.770004458 | 0.971467567 | NA |
| ASV_16s_13594 | 0.223379942 | -0.028893503 | 3.550882776 | 1.051054646 | NA          | NA |
| ASV_16s_13595 | 0.296815128 | 0.349040381  | 3.550200111 | 1.385991889 | NA          | NA |
| ASV_16s_13596 | 0.177082454 | 0.352696189  | 3.55070603  | 0.999829619 | NA          | NA |
| ASV_16s_13597 | 0.374233533 | 0.363377665  | 3.550435506 | 0.947409902 | NA          | NA |
| ASV_16s_13598 | 0.226521305 | 0.360337794  | 3.551041986 | 1.041621007 | NA          | NA |
| ASV_16s_13599 | 0.226521305 | 0.360337794  | 3.551041986 | 1.041621007 | NA          | NA |
| ASV_16s_13600 | 0.226521305 | 0.360337794  | 3.551041986 | 1.041621007 | NA          | NA |
| ASV_16s_13601 | 0.226521305 | 0.360337794  | 3.551041986 | 1.041621007 | NA          | NA |
| ASV_16s_13602 | 0.278541414 | 0.315939479  | 3.550845035 | 1.106761659 | 0.992917725 | NA |
| ASV_16s_13603 | 0.250251125 | 0.315939508  | 3.55087404  | 1.052720583 | 0.993932664 | NA |
| ASV_16s_13604 | 0.252884465 | 0.315939505  | 3.550871065 | 1.058004769 | 0.993837793 | NA |
| ASV_16s_13605 | 0.250719686 | 0.315939507  | 3.550873505 | 1.05367075  | 0.993915674 | NA |
| ASV_16s_13606 | 0.27927805  | 0.315939475  | 3.550844368 | 1.108036696 | 0.992892569 | NA |
| ASV_16s_13607 | 0.243436732 | 0.315939516  | 3.550882029 | 1.038838171 | 0.994177457 | NA |

|               |             |              |             |             |             |    |
|---------------|-------------|--------------|-------------|-------------|-------------|----|
| ASV_16s_13608 | 0.24206795  | 0.315939518  | 3.550883688 | 1.036002623 | 0.994226669 | NA |
| ASV_16s_13609 | 0.296130626 | 0.315939468  | 3.550829796 | 1.137656474 | 0.992292233 | NA |
| ASV_16s_13610 | 0.23659282  | 0.315939643  | 3.550890517 | 1.024510657 | NA          | NA |
| ASV_16s_13611 | 0.23659282  | 0.315939643  | 3.550890517 | 1.024510657 | NA          | NA |
| ASV_16s_13612 | 0.255250843 | 0.818832561  | 3.550737221 | 1.402012699 | 0.985509538 | NA |
| ASV_16s_13613 | 0.225316104 | 0.687961372  | 3.550849054 | 0.91105823  | NA          | NA |
| ASV_16s_13614 | 0.312983228 | 0.734422302  | 3.550919452 | 1.141282353 | NA          | NA |
| ASV_16s_13615 | 0.312983228 | 0.734422302  | 3.550919452 | 1.141282353 | NA          | NA |
| ASV_16s_13616 | 0.155038015 | 0.733230299  | 3.551266031 | 0.796829006 | NA          | NA |
| ASV_16s_13617 | 0.155038015 | 0.733230299  | 3.551266031 | 0.796829006 | NA          | NA |
| ASV_16s_13618 | 0.155038015 | 0.733230299  | 3.551266031 | 0.796829006 | NA          | NA |
| ASV_16s_13619 | 0.155038015 | 0.733230299  | 3.551266031 | 0.796829006 | NA          | NA |
| ASV_16s_13620 | 0.294275479 | 0.693316935  | 3.550804334 | 1.069464752 | 0.993628814 | NA |
| ASV_16s_13621 | 0.286420522 | 0.69329108   | 3.550811225 | 1.055787639 | 0.993877713 | NA |
| ASV_16s_13622 | 0.264152826 | 0.693219032  | 3.550832956 | 1.015081126 | 0.994581574 | NA |
| ASV_16s_13623 | 0.23659282  | 0.693107941  | 3.550865483 | 0.95997707  | NA          | NA |
| ASV_16s_13624 | 0.23659282  | 0.693107941  | 3.550865483 | 0.95997707  | NA          | NA |
| ASV_16s_13625 | 0.23659282  | 0.693107941  | 3.550865483 | 0.95997707  | NA          | NA |
| ASV_16s_13626 | 0.199901457 | 0.283759403  | 3.551545705 | 0.670979097 | NA          | NA |
| ASV_16s_13627 | 0.205079834 | -0.147737571 | 3.550659568 | 1.18600529  | 0.991245561 | NA |
| ASV_16s_13628 | 0.204832323 | -0.161439319 | 3.550648617 | 1.1935169   | 0.991075404 | NA |
| ASV_16s_13629 | 0.23838637  | -0.217158063 | 3.550363485 | 1.31315417  | 0.988084092 | NA |
| ASV_16s_13630 | 0.204078383 | -0.174143185 | 3.550644118 | 1.197605138 | 0.990981934 | NA |
| ASV_16s_13631 | 0.200032651 | -0.180800179 | 3.550674423 | 1.185607672 | 0.991254511 | NA |
| ASV_16s_13632 | 0.20585659  | -0.191437372 | 3.550615658 | 1.209506094 | 0.990706372 | NA |
| ASV_16s_13633 | 0.203071228 | -0.186428013 | 3.550643206 | 1.197605004 | 0.990981938 | NA |
| ASV_16s_13634 | 0.205355865 | -0.204537291 | 3.550611232 | 1.208070746 | 0.990739882 | NA |
| ASV_16s_13635 | 0.203076932 | -0.200582337 | 3.550633254 | 1.199138115 | 0.990946729 | NA |
| ASV_16s_13636 | 0.203082636 | -0.214771394 | 3.550624753 | 1.198890218 | 0.990952428 | NA |
| ASV_16s_13637 | 0.206374428 | -0.22024114  | 3.550593901 | 1.211342394 | 0.990663393 | NA |
| ASV_16s_13638 | 0.219278686 | -0.240110721 | 3.550484045 | 1.247989734 | 0.989779646 | NA |
| ASV_16s_13639 | 0.214383142 | -0.246358267 | 3.550518706 | 1.234157612 | 0.990119043 | NA |
| ASV_16s_13640 | 0.200055467 | -0.238420243 | 3.55064001  | 1.184162382 | 0.991286995 | NA |
| ASV_16s_13641 | 0.205125466 | -0.26053009  | 3.550589038 | 1.197447692 | 0.990985545 | NA |
| ASV_16s_13642 | 0.204112607 | -0.259035608 | 3.550597986 | 1.193962856 | 0.991065238 | NA |
| ASV_16s_13643 | 0.207151185 | -0.263478822 | 3.550571445 | 1.204342716 | 0.990826564 | NA |
| ASV_16s_13644 | 0.200066875 | -0.267502034 | 3.550630989 | 1.171316739 | 0.991572397 | NA |
| ASV_16s_13645 | 0.205643304 | -0.290265211 | 3.550577822 | 1.179644463 | 0.991388052 | NA |
| ASV_16s_13646 | 0.212886669 | -0.299893934 | 3.550517946 | 1.20058768  | 0.99091336  | NA |
| ASV_16s_13647 | 0.20412972  | -0.303047607 | 3.550588865 | 1.16320257  | 0.991749618 | NA |
| ASV_16s_13648 | 0.221157238 | -0.3242063   | 3.550454461 | 1.210846973 | 0.990675    | NA |
| ASV_16s_13649 | 0.204641853 | -0.318764518 | 3.550583761 | 1.151954436 | 0.991991394 | NA |
| ASV_16s_13650 | 0.213999021 | -0.360036017 | 3.55051241  | 1.148152164 | 0.992072104 | NA |
| ASV_16s_13651 | 0.210590844 | -0.387703546 | 3.550547774 | 1.103012569 | 0.992991365 | NA |
| ASV_16s_13652 | 0.200112508 | -0.39287035  | 3.550636526 | 1.056208237 | NA          | NA |
| ASV_16s_13653 | 0.071462364 | -0.297881962 | 3.551673039 | 0.369784567 | NA          | NA |
| ASV_16s_13654 | 0.071462364 | -0.297881962 | 3.551673039 | 0.369784567 | NA          | NA |
| ASV_16s_13655 | 0.283073116 | -0.679897884 | 3.550307033 | 0.806327832 | 0.997378838 | NA |
| ASV_16s_13656 | 0.262064752 | -0.676439402 | 3.55042479  | 0.781217718 | 0.997630941 | NA |
| ASV_16s_13657 | 0.261601106 | -0.67625505  | 3.550427212 | 0.78062881  | 0.997636653 | NA |
| ASV_16s_13658 | 0.237544881 | -0.66402381  | 3.550555317 | 0.748411708 | 0.997935486 | NA |
| ASV_16s_13659 | 0.235196073 | -0.662575983 | 3.550568399 | 0.745059494 | NA          | NA |
| ASV_16s_13660 | 0.203219534 | -0.636006715 | 3.550748659 | 0.696120062 | NA          | NA |
| ASV_16s_13661 | 0.200180956 | -0.633071836 | 3.550767822 | 0.691087615 | NA          | NA |
| ASV_16s_13662 | 0.200180956 | -0.633071836 | 3.550767822 | 0.691087615 | NA          | NA |
| ASV_16s_13663 | 0.200180956 | -0.633071836 | 3.550767822 | 0.691087615 | NA          | NA |
| ASV_16s_13664 | 0.056572381 | -0.168678088 | 3.550975132 | 0.275903447 | NA          | NA |
| ASV_16s_13665 | 0.080953061 | 0.220202816  | 3.550933489 | 0.376288568 | 0.999785333 | NA |
| ASV_16s_13666 | 0.088910036 | 0.220178819  | 3.5509017   | 0.412106566 | NA          | NA |
| ASV_16s_13667 | 0.088910036 | 0.220178819  | 3.5509017   | 0.412106566 | NA          | NA |
| ASV_16s_13668 | 0.288234568 | -0.894328727 | 3.550410399 | 0.684498442 | 0.998452029 | NA |
| ASV_16s_13669 | 0.207652586 | 0.006235182  | 3.550605841 | 1.126000477 | 0.992532143 | NA |
| ASV_16s_13670 | 0.203181166 | -0.342297231 | 3.55057609  | 0.707689499 | NA          | NA |
| ASV_16s_13671 | 0.21876602  | 0.285948449  | 3.550574228 | 1.174125588 | 0.991510499 | NA |
| ASV_16s_13672 | 0.256697168 | -0.734311576 | 3.550363936 | 0.869969938 | 0.996662603 | NA |
| ASV_16s_13673 | 0.260837731 | -0.7143425   | 3.550171969 | 1.023899587 | 0.994433734 | NA |
| ASV_16s_13674 | 0.304979301 | -0.550663197 | 3.550209494 | 1.256209039 | 0.989574595 | NA |

|               |             |              |             |             |             |    |
|---------------|-------------|--------------|-------------|-------------|-------------|----|
| ASV_16s_13675 | 0.260758219 | -0.715007434 | 3.550174556 | 1.029132931 | NA          | NA |
| ASV_16s_13676 | 0.24537644  | -0.673031307 | 3.550236938 | 1.035939306 | NA          | NA |
| ASV_16s_13677 | 0.268128597 | -0.694150895 | 3.550094336 | 1.109125049 | 0.992871052 | NA |
| ASV_16s_13678 | 0.21364435  | 0.493177069  | 3.550554487 | 1.021810394 | 0.99446899  | NA |
| ASV_16s_13679 | 0.274945631 | -0.717462602 | 3.550063411 | 1.109038219 | 0.99287277  | NA |
| ASV_16s_13680 | 0.261686734 | -0.671670867 | 3.550134938 | 1.113795052 | 0.992778258 | NA |
| ASV_16s_13681 | 0.256414176 | -0.653311142 | 3.550166801 | 1.113505939 | 0.992784025 | NA |
| ASV_16s_13682 | 0.252703273 | -0.652590613 | 3.550185712 | 1.10460705  | 0.992960105 | NA |
| ASV_16s_13683 | 0.217150067 | -0.362575651 | 3.550685651 | 1.014572417 | NA          | NA |
| ASV_16s_13684 | 0.320280833 | -0.157158064 | 3.549297054 | 1.206461228 | NA          | NA |
| ASV_16s_13685 | 0.262628721 | -0.63191405  | 3.550159191 | 1.158175286 | NA          | NA |
| ASV_16s_13686 | 0.266318735 | 0.206688235  | 3.549662719 | 0.844827045 | NA          | NA |
| ASV_16s_13687 | 0.233850518 | 0.663053351  | 3.550874382 | 0.677316607 | 0.998504019 | NA |
| ASV_16s_13688 | 0.258276265 | -0.593968114 | 3.550226624 | 1.1615718   | NA          | NA |
| ASV_16s_13689 | 0.24409546  | -0.508207765 | 3.550859785 | 0.949714641 | 0.99559944  | NA |
| ASV_16s_13690 | 0.25895529  | 0.679112786  | 3.55091514  | 1.118471561 | NA          | NA |
| ASV_16s_13691 | 0.261122292 | 0.244961187  | 3.55012696  | 0.840648392 | NA          | NA |
| ASV_16s_13692 | 0.273669261 | 0.209376384  | 3.549781063 | 0.976401406 | 0.995200284 | NA |
| ASV_16s_13693 | 0.264514995 | 0.386837461  | 3.550796136 | 1.195613383 | 0.991027548 | NA |
| ASV_16s_13694 | 0.353523711 | 0.72980425   | 3.551005549 | 1.355220749 | NA          | NA |
| ASV_16s_13695 | 0.25922037  | -0.43192192  | 3.550638751 | 0.901356159 | 0.996266828 | NA |
| ASV_16s_13696 | 0.245487615 | -0.504757523 | 3.550537079 | 1.00898129  | 0.994682352 | NA |
| ASV_16s_13697 | 0.27036031  | -0.429264364 | 3.550468931 | 1.182660799 | 0.991320664 | NA |
| ASV_16s_13698 | 0.253627141 | 0.308798166  | 3.551047811 | 0.743163695 | 0.997981661 | NA |
| ASV_16s_13699 | 0.243958905 | -0.694257913 | 3.550461217 | 0.66194165  | NA          | NA |
| ASV_16s_13700 | 0.209150191 | -0.154108294 | 3.551373502 | 0.576321022 | 0.999116277 | NA |
| ASV_16s_13701 | 0.2179125   | -0.083399404 | 3.550809231 | 0.975647895 | 0.995211862 | NA |
| ASV_16s_13702 | 0.225672453 | 0.459994703  | 3.551064787 | 0.873366929 | NA          | NA |
| ASV_16s_13703 | 0.3358533   | 0.073509287  | 3.549415318 | 0.893648529 | NA          | NA |
| ASV_16s_13704 | 0.279661207 | 1.796154474  | 3.550224918 | 0.441993082 | 0.999632385 | NA |
| ASV_16s_13705 | 0.234120448 | 1.552605146  | 3.550482651 | 0.559268746 | 0.999199228 | NA |
| ASV_16s_13706 | 0.24937238  | 1.271655754  | 3.550789238 | 0.71554867  | NA          | NA |
| ASV_16s_13707 | 0.24937238  | 1.271655754  | 3.550789238 | 0.71554867  | NA          | NA |
| ASV_16s_13708 | 0.231298533 | 0.364398747  | 3.550745432 | 1.019012453 | NA          | NA |
| ASV_16s_13709 | 0.205315472 | 0.57406251   | 3.551108544 | 0.902846043 | NA          | NA |
| ASV_16s_13710 | 0.251031595 | -0.537824108 | 3.550391777 | 0.892508495 | 0.996381322 | NA |
| ASV_16s_13711 | 0.279765185 | 0.286616726  | 3.550526563 | 0.980916222 | 0.995130538 | NA |
| ASV_16s_13712 | 0.255802652 | 0.400165728  | 3.55108407  | 0.587232534 | 0.999060265 | NA |
| ASV_16s_13713 | 0.290451851 | 0.395889304  | 3.550979415 | 0.79626174  | NA          | NA |
| ASV_16s_13714 | 0.168097736 | 0.358247195  | 3.551702837 | 0.61290479  | NA          | NA |
| ASV_16s_13715 | 0.168097736 | 0.358247195  | 3.551702837 | 0.61290479  | NA          | NA |
| ASV_16s_13716 | 0.168097736 | 0.358247195  | 3.551702837 | 0.61290479  | NA          | NA |
| ASV_16s_13717 | 0.305526026 | 0.398403905  | 3.550902428 | 0.813018648 | NA          | NA |
| ASV_16s_13718 | 0.284454547 | -0.565048993 | 3.550588599 | 0.899557349 | 0.996290293 | NA |
| ASV_16s_13719 | 0.256621893 | -0.568304235 | 3.550602793 | 0.799032627 | NA          | NA |
| ASV_16s_13720 | 0.167881095 | -0.521999348 | 3.550936507 | 0.615854822 | NA          | NA |
| ASV_16s_13721 | 0.215854471 | -1.080394174 | 3.550437022 | 0.373879881 | NA          | NA |
| ASV_16s_13722 | 0.246968585 | -0.562818573 | 3.550316521 | 0.740621789 | NA          | NA |
| ASV_16s_13723 | 0.184432473 | -0.982185152 | 3.550743037 | 0.347127199 | NA          | NA |
| ASV_16s_13724 | 0.242312766 | 1.657600932  | 3.550457603 | 0.428039008 | NA          | NA |
| ASV_16s_13725 | 0.248904987 | 1.288090767  | 3.550595495 | 0.653790555 | NA          | NA |
| ASV_16s_13726 | 0.222701948 | 1.264274383  | 3.550696519 | 0.615339642 | NA          | NA |
| ASV_16s_13727 | 0.263112781 | 0.415986836  | 3.550801423 | 0.696253954 | NA          | NA |
| ASV_16s_13728 | 0.231860963 | 0.406200557  | 3.550953824 | 0.653954903 | NA          | NA |
| ASV_16s_13729 | 0.191398488 | 0.389316535  | 3.551194557 | 0.59037314  | NA          | NA |
| ASV_16s_13730 | 0.191398488 | 0.389316535  | 3.551194557 | 0.59037314  | NA          | NA |
| ASV_16s_13731 | 0.191398488 | 0.389316535  | 3.551194557 | 0.59037314  | NA          | NA |
| ASV_16s_13732 | 0.191398488 | 0.389316535  | 3.551194557 | 0.59037314  | NA          | NA |
| ASV_16s_13733 | 0.182316081 | 0.296049653  | 3.551378719 | 0.335291721 | NA          | NA |
| ASV_16s_13734 | 0.34056252  | 0.333990843  | 3.549641861 | 2.020575332 | 0.958692791 | NA |
| ASV_16s_13735 | 0.116349764 | -0.449001695 | 3.55110596  | 0.434542837 | NA          | NA |
| ASV_16s_13736 | 0.116349764 | -0.449001695 | 3.55110596  | 0.434542837 | NA          | NA |
| ASV_16s_13737 | 0.116349764 | -0.449001695 | 3.55110596  | 0.434542837 | NA          | NA |
| ASV_16s_13738 | 0.270108438 | 0.27468248   | 3.549800192 | 1.291731864 | 0.98865922  | NA |
| ASV_16s_13739 | 0.368168941 | -0.548995687 | 3.549589962 | 0.79769411  | NA          | NA |
| ASV_16s_13740 | 0.183878691 | -0.534562079 | 3.55046111  | 0.573509409 | 0.999130336 | NA |
| ASV_16s_13741 | 0.14130412  | -0.495917975 | 3.550853531 | 0.493872108 | NA          | NA |

|               |             |              |             |             |             |    |
|---------------|-------------|--------------|-------------|-------------|-------------|----|
| ASV_16s_13742 | 0.197710481 | -0.078703873 | 3.550790924 | 0.931487262 | NA          | NA |
| ASV_16s_13743 | 0.203920983 | -0.078730115 | 3.550782534 | 0.946702273 | 0.9956431   | NA |
| ASV_16s_13744 | 0.208061318 | -0.078748119 | 3.550777217 | 0.956628563 | 0.995498167 | NA |
| ASV_16s_13745 | 0.210649027 | -0.078759016 | 3.550774    | 0.96274077  | 0.995407396 | NA |
| ASV_16s_13746 | 0.13664448  | 0.220092789  | 3.550788459 | 0.594455078 | 0.999021904 | NA |
| ASV_16s_13747 | 0.139825581 | 0.220089139  | 3.550783651 | 0.605025458 | 0.998963881 | NA |
| ASV_16s_13748 | 0.140885947 | 0.220087958  | 3.550782096 | 0.608512419 | 0.998944244 | NA |
| ASV_16s_13749 | 0.141652843 | 0.220087123  | 3.550780986 | 0.611021423 | 0.998929961 | NA |
| ASV_16s_13750 | 0.147188617 | 0.220081304  | 3.550773314 | 0.628853417 | NA          | NA |
| ASV_16s_13751 | 0.147188617 | 0.220081304  | 3.550773314 | 0.628853417 | NA          | NA |
| ASV_16s_13752 | 0.219044999 | 0.310940347  | 3.550886698 | 0.963033211 | NA          | NA |
| ASV_16s_13753 | 0.155051593 | 0.596005493  | 3.550727125 | 0.588414646 | NA          | NA |
| ASV_16s_13754 | 0.155051593 | 0.596005493  | 3.550727125 | 0.588414646 | NA          | NA |
| ASV_16s_13755 | 0.155051593 | 0.596005493  | 3.550727125 | 0.588414646 | NA          | NA |
| ASV_16s_13756 | 0.279478082 | 1.044885184  | 3.550213736 | 1.075111607 | 0.993524207 | NA |
| ASV_16s_13757 | 0.202665664 | -0.067979232 | 3.550712588 | 1.095418858 | NA          | NA |
| ASV_16s_13758 | 0.210428792 | -0.06803008  | 3.550696408 | 1.118348044 | 0.992687058 | NA |
| ASV_16s_13759 | 0.238336434 | 0.657904963  | 3.551722227 | 0.677435982 | NA          | NA |
| ASV_16s_13760 | 0.208116366 | -0.068484364 | 3.550489681 | 1.241874416 | NA          | NA |
| ASV_16s_13761 | 0.183623288 | 1.399389226  | 3.55135946  | 0.346822382 | 0.999836786 | NA |
| ASV_16s_13762 | 0.188749938 | 0.320710457  | 3.551023902 | 0.957407844 | NA          | NA |
| ASV_16s_13763 | 0.224335535 | -0.06854516  | 3.550368105 | 1.316964544 | 0.987979959 | NA |
| ASV_16s_13764 | 0.254014406 | 0.385125293  | 3.550270177 | 0.775933504 | NA          | NA |
| ASV_16s_13765 | 0.273200972 | 0.290440905  | 3.550023487 | 1.291766565 | NA          | NA |
| ASV_16s_13766 | 0.21554914  | -0.05701477  | 3.550619686 | 1.171587466 | NA          | NA |
| ASV_16s_13767 | 0.203480411 | -0.232403455 | 3.551295604 | 0.590943608 | NA          | NA |
| ASV_16s_13768 | 0.255698121 | 0.323841545  | 3.551135794 | 0.729813412 | 0.99809603  | NA |
| ASV_16s_13769 | 0.222145043 | -0.00941931  | 3.550915877 | 1.087361181 | NA          | NA |
| ASV_16s_13770 | 0.098981046 | 0.284611392  | 3.551748824 | 0.450050946 | NA          | NA |
| ASV_16s_13771 | 0.143354604 | 0.618797709  | 3.551586855 | 0.74116591  | NA          | NA |
| ASV_16s_13772 | 0.196487823 | 1.040383546  | 3.551124321 | 0.607757508 | NA          | NA |
| ASV_16s_13773 | 0.27180969  | 1.320380685  | 3.550173444 | 0.978678225 | NA          | NA |
| ASV_16s_13774 | 0.250019476 | 1.057195866  | 3.550435561 | 1.056250981 | NA          | NA |
| ASV_16s_13775 | 0.243705361 | 0.469121961  | 3.55088255  | 0.997442664 | 0.994869684 | NA |
| ASV_16s_13776 | 0.165923153 | -0.078526109 | 3.550843654 | 0.846340457 | NA          | NA |
| ASV_16s_13777 | 0.165923153 | -0.078526109 | 3.550843654 | 0.846340457 | NA          | NA |
| ASV_16s_13778 | 0.196873554 | -0.116574194 | 3.550299241 | 1.16257239  | NA          | NA |
| ASV_16s_13779 | 0.516131291 | -0.029516834 | 3.550676974 | 1.474407289 | NA          | NA |
| ASV_16s_13780 | 0.314012614 | 0.581718301  | 3.550865151 | 1.567406163 | NA          | NA |
| ASV_16s_13781 | 0.310368089 | 0.651086011  | 3.550891116 | 1.371708674 | NA          | NA |
| ASV_16s_13782 | 0.343830506 | 0.801139349  | 3.550194138 | 1.492443338 | NA          | NA |
| ASV_16s_13783 | 0.283626277 | 0.342867166  | 3.550090923 | 1.443498201 | NA          | NA |
| ASV_16s_13784 | 0.182688656 | -0.073532484 | 3.550843169 | 0.917031286 | NA          | NA |
| ASV_16s_13785 | 0.275542748 | 0.342663008  | 3.550107076 | 1.428905572 | 0.984669418 | NA |
| ASV_16s_13786 | 0.275543763 | 0.375401014  | 3.550557528 | 1.259365562 | NA          | NA |
| ASV_16s_13787 | 0.24971823  | 0.360350483  | 3.551000596 | 1.090568581 | NA          | NA |
| ASV_16s_13788 | 0.24971823  | 0.360350483  | 3.551000596 | 1.090568581 | NA          | NA |
| ASV_16s_13789 | 0.24971823  | 0.360350483  | 3.551000596 | 1.090568581 | NA          | NA |
| ASV_16s_13790 | 0.266730996 | 0.327759197  | 3.550891581 | 0.95091948  | 0.995581899 | NA |
| ASV_16s_13791 | 0.317886409 | 0.359868854  | 3.550708794 | 0.891176495 | NA          | NA |
| ASV_16s_13792 | 0.294098237 | 0.727368722  | 3.550981914 | 1.259199722 | NA          | NA |
| ASV_16s_13793 | 0.221990879 | 0.360335019  | 3.55105109  | 1.031462734 | NA          | NA |
| ASV_16s_13794 | 0.221990879 | 0.360335019  | 3.55105109  | 1.031462734 | NA          | NA |
| ASV_16s_13795 | 0.221990879 | 0.360335019  | 3.55105109  | 1.031462734 | NA          | NA |
| ASV_16s_13796 | 0.221990879 | 0.360335019  | 3.55105109  | 1.031462734 | NA          | NA |
| ASV_16s_13797 | 0.298077371 | 0.694242742  | 3.550921847 | 1.371370862 | NA          | NA |
| ASV_16s_13798 | 0.287632378 | 0.315939581  | 3.550836914 | 1.123038766 | NA          | NA |
| ASV_16s_13799 | 0.25690119  | 0.315939521  | 3.550866658 | 1.06590021  | 0.99369429  | NA |
| ASV_16s_13800 | 0.245519269 | 0.315939535  | 3.550879553 | 1.043063951 | 0.994103622 | NA |
| ASV_16s_13801 | 0.296005702 | 0.551245351  | 3.550797622 | 1.745619187 | 0.972570817 | NA |
| ASV_16s_13802 | 0.239731463 | 0.315939543  | 3.550886574 | 1.03108571  | 0.994311373 | NA |
| ASV_16s_13803 | 0.236993898 | 0.315939546  | 3.550890015 | 1.025317139 | 0.994409732 | NA |
| ASV_16s_13804 | 0.236651702 | 0.315939547  | 3.550890451 | 1.024591647 | 0.994422024 | NA |
| ASV_16s_13805 | 0.236309506 | 0.315939547  | 3.550890888 | 1.023865165 | 0.994434316 | NA |
| ASV_16s_13806 | 0.248549689 | 0.315939531  | 3.550876013 | 1.049202388 | 0.993995309 | NA |
| ASV_16s_13807 | 0.279044883 | 0.315939498  | 3.550844593 | 1.107566135 | 0.992901859 | NA |
| ASV_16s_13808 | 0.231860963 | 0.315939661  | 3.550896687 | 1.014329489 | NA          | NA |

|               |             |              |             |             |             |    |
|---------------|-------------|--------------|-------------|-------------|-------------|----|
| ASV_16s_13809 | 0.231860963 | 0.315939661  | 3.550896687 | 1.014329489 | NA          | NA |
| ASV_16s_13810 | 0.228477949 | 0.715477868  | 3.55054219  | 1.166015917 | NA          | NA |
| ASV_16s_13811 | 0.263702279 | 1.032614615  | 3.549931388 | 0.549475897 | NA          | NA |
| ASV_16s_13812 | 0.398908315 | 0.688363457  | 3.550721146 | 1.198768034 | NA          | NA |
| ASV_16s_13813 | 0.384778057 | 1.155408941  | 3.55030409  | 0.905401301 | NA          | NA |
| ASV_16s_13814 | 0.261926381 | 0.856916898  | 3.550835551 | 0.893341894 | 0.996370636 | NA |
| ASV_16s_13815 | 0.306723563 | 0.734398264  | 3.550926445 | 1.131024113 | NA          | NA |
| ASV_16s_13816 | 0.306723563 | 0.734398264  | 3.550926445 | 1.131024113 | NA          | NA |
| ASV_16s_13817 | 0.306723563 | 0.734398264  | 3.550926445 | 1.131024113 | NA          | NA |
| ASV_16s_13818 | 0.306723563 | 0.734398264  | 3.550926445 | 1.131024113 | NA          | NA |
| ASV_16s_13819 | 0.306723563 | 0.734398264  | 3.550926445 | 1.131024113 | NA          | NA |
| ASV_16s_13820 | 0.306723563 | 0.734398264  | 3.550926445 | 1.131024113 | NA          | NA |
| ASV_16s_13821 | 0.306723563 | 0.734398264  | 3.550926445 | 1.131024113 | NA          | NA |
| ASV_16s_13822 | 0.151937254 | 0.733011098  | 3.551279629 | 0.787503688 | NA          | NA |
| ASV_16s_13823 | 0.269374526 | 0.693235638  | 3.550827546 | 1.024877495 | 0.994417183 | NA |
| ASV_16s_13824 | 0.293244613 | 0.693314041  | 3.550805225 | 1.067652691 | NA          | NA |
| ASV_16s_13825 | 0.268012968 | 0.693230851  | 3.550828942 | 1.022313026 | 0.994460521 | NA |
| ASV_16s_13826 | 0.250651877 | 0.693167754  | 3.550848013 | 0.988725998 | 0.995008357 | NA |
| ASV_16s_13827 | 0.246893694 | 0.693152456  | 3.550852492 | 0.981166642 | 0.99512665  | NA |
| ASV_16s_13828 | 0.231860963 | 0.693086379  | 3.550871852 | 0.949886837 | NA          | NA |
| ASV_16s_13829 | 0.34061601  | 0.693434182  | 3.550770164 | 1.143384328 | NA          | NA |
| ASV_16s_13830 | 0.462075913 | 1.203349054  | 3.549889767 | 0.910720229 | NA          | NA |
| ASV_16s_13831 | 0.195821836 | 0.284835156  | 3.55156916  | 0.66400687  | NA          | NA |
| ASV_16s_13832 | 0.195821836 | 0.284835156  | 3.55156916  | 0.66400687  | NA          | NA |
| ASV_16s_13833 | 0.195924509 | -0.113055367 | 3.550783311 | 1.132609583 | 0.992396698 | NA |
| ASV_16s_13834 | 0.200741294 | -0.13872372  | 3.550707648 | 1.161676214 | 0.991782692 | NA |
| ASV_16s_13835 | 0.202115306 | -0.156035272 | 3.55067769  | 1.175702615 | 0.991475621 | NA |
| ASV_16s_13836 | 0.195947325 | -0.172917186 | 3.550718628 | 1.168024231 | 0.991644593 | NA |
| ASV_16s_13837 | 0.195947325 | -0.172917186 | 3.550718628 | 1.168024231 | 0.991644593 | NA |
| ASV_16s_13838 | 0.213080765 | -0.217282025 | 3.550541338 | 1.228733139 | 0.990250206 | NA |
| ASV_16s_13839 | 0.201776969 | -0.198267945 | 3.550646272 | 1.193838553 | 0.991068072 | NA |
| ASV_16s_13840 | 0.201776969 | -0.198267945 | 3.550646272 | 1.193838553 | 0.991068072 | NA |
| ASV_16s_13841 | 0.200004465 | -0.195091802 | 3.550664155 | 1.186373824 | 0.99123726  | NA |
| ASV_16s_13842 | 0.217535477 | -0.237545445 | 3.550498033 | 1.242744382 | 0.989909188 | NA |
| ASV_16s_13843 | 0.202294807 | -0.227661443 | 3.550625168 | 1.194495589 | 0.991053084 | NA |
| ASV_16s_13844 | 0.200021578 | -0.238341992 | 3.550640475 | 1.183927165 | 0.991292275 | NA |
| ASV_16s_13845 | 0.210348508 | -0.267989787 | 3.550544694 | 1.211308515 | 0.990664187 | NA |
| ASV_16s_13846 | 0.195981549 | -0.261334237 | 3.550669391 | 1.157007383 | 0.99188334  | NA |
| ASV_16s_13847 | 0.207757222 | -0.278594994 | 3.55056292  | 1.194532521 | 0.991052241 | NA |
| ASV_16s_13848 | 0.204618498 | -0.303672214 | 3.550584803 | 1.164625169 | 0.991718718 | NA |
| ASV_16s_13849 | 0.200550823 | -0.298177242 | 3.550620434 | 1.151827415 | 0.991994098 | NA |
| ASV_16s_13850 | 0.219523494 | -0.351082183 | 3.550468828 | 1.17884178  | 0.991405929 | NA |
| ASV_16s_13851 | 0.202610766 | -0.395892829 | 3.550617891 | 1.062694808 | 0.993752803 | NA |
| ASV_16s_13852 | 0.200095731 | -0.444535255 | 3.550659225 | 0.989330425 | 0.99499882  | NA |
| ASV_16s_13853 | 0.070003948 | -0.291052633 | 3.551684332 | 0.364454204 | NA          | NA |
| ASV_16s_13854 | 0.070003948 | -0.291052633 | 3.551684332 | 0.364454204 | NA          | NA |
| ASV_16s_13855 | 0.270993535 | -0.678448381 | 3.550373852 | 0.792190617 | 0.997522836 | NA |
| ASV_16s_13856 | 0.211544103 | -0.643798879 | 3.550698776 | 0.709525138 | NA          | NA |
| ASV_16s_13857 | 0.20824994  | -0.640754934 | 3.550718085 | 0.704286363 | NA          | NA |
| ASV_16s_13858 | 0.196095631 | -0.628205708 | 3.550791419 | 0.684057343 | NA          | NA |
| ASV_16s_13859 | 0.196095631 | -0.628205708 | 3.550791419 | 0.684057343 | NA          | NA |
| ASV_16s_13860 | 0.196095631 | -0.628205708 | 3.550791419 | 0.684057343 | NA          | NA |
| ASV_16s_13861 | 0.062477322 | -0.168852562 | 3.550931161 | 0.308119519 | NA          | NA |
| ASV_16s_13862 | 0.062477322 | -0.168852562 | 3.550931161 | 0.308119519 | NA          | NA |
| ASV_16s_13863 | 0.055417843 | -0.168639592 | 3.550984833 | 0.269460499 | NA          | NA |
| ASV_16s_13864 | 0.126930974 | 0.220105101  | 3.550804635 | 0.561144214 | NA          | NA |
| ASV_16s_13865 | 0.220096683 | -0.156168841 | 3.55104687  | 0.93630536  | 0.995791638 | NA |
| ASV_16s_13866 | 0.201381168 | -0.373192732 | 3.550683398 | 0.688566122 | NA          | NA |
| ASV_16s_13867 | 0.309727652 | 1.525853257  | 3.550401873 | 0.579947963 | 0.999097916 | NA |
| ASV_16s_13868 | 0.224487459 | 0.321449689  | 3.550447393 | 1.210086561 | 0.9906928   | NA |
| ASV_16s_13869 | 0.261527542 | -0.10407105  | 3.549841789 | 1.176141234 | 0.991465905 | NA |
| ASV_16s_13870 | 0.203369874 | -0.024338455 | 3.551366901 | 0.859941554 | 0.996783028 | NA |
| ASV_16s_13871 | 0.249838423 | -0.711915632 | 3.550268667 | 0.957623063 | 0.995483477 | NA |
| ASV_16s_13872 | 0.251915261 | -0.707701432 | 3.550237434 | 0.986580457 | 0.995042117 | NA |
| ASV_16s_13873 | 0.203111582 | -0.460339633 | 3.550896303 | 0.987175692 | 0.995032766 | NA |
| ASV_16s_13874 | 0.260379402 | 0.117094736  | 3.549809173 | 0.784053009 | 0.997603312 | NA |
| ASV_16s_13875 | 0.276395381 | -0.724103743 | 3.550062255 | 1.086358523 | 0.993312627 | NA |

|               |             |              |             |             |             |    |
|---------------|-------------|--------------|-------------|-------------|-------------|----|
| ASV_16s_13876 | 0.268706246 | -0.688145603 | 3.550093054 | 1.119730708 | 0.992659219 | NA |
| ASV_16s_13877 | 0.263433392 | -1.041240047 | 3.550174417 | 0.594201282 | 0.999023269 | NA |
| ASV_16s_13878 | 0.268971051 | -0.679901743 | 3.550097501 | 1.136612219 | 0.992313921 | NA |
| ASV_16s_13879 | 0.246005696 | -0.640643758 | 3.550225241 | 1.082908641 | 0.993377986 | NA |
| ASV_16s_13880 | 0.276752293 | -0.454056065 | 3.550518086 | 1.108260726 | NA          | NA |
| ASV_16s_13881 | 0.236388803 | -0.938361619 | 3.550309692 | 0.572890174 | NA          | NA |
| ASV_16s_13882 | 0.267741308 | -0.632046369 | 3.550141302 | 1.173647987 | 0.991521044 | NA |
| ASV_16s_13883 | 0.229741208 | -0.571868932 | 3.550364817 | 1.072240581 | NA          | NA |
| ASV_16s_13884 | 0.253933435 | -0.604489302 | 3.550225769 | 1.138914849 | 0.992266046 | NA |
| ASV_16s_13885 | 0.246645759 | -0.556495171 | 3.550326316 | 1.132131231 | 0.992406552 | NA |
| ASV_16s_13886 | 0.250603333 | -0.579437968 | 3.550510811 | 0.891319252 | 0.996396535 | NA |
| ASV_16s_13887 | 0.129453113 | -0.824089635 | 3.550590968 | 0.321881875 | 0.999873088 | NA |
| ASV_16s_13888 | 0.255662106 | -0.436870835 | 3.550474409 | 1.143730479 | 0.992165316 | NA |
| ASV_16s_13889 | 0.245424507 | 0.063234039  | 3.550649587 | 1.064768008 | 0.993714998 | NA |
| ASV_16s_13890 | 0.246655788 | 0.221065123  | 3.549494027 | 1.214037701 | 0.990600083 | NA |
| ASV_16s_13891 | 0.243471217 | 0.678507086  | 3.550949517 | 1.038341422 | 0.994186098 | NA |
| ASV_16s_13892 | 0.251335376 | 1.213505583  | 3.550903122 | 0.690325785 | NA          | NA |
| ASV_16s_13893 | 0.22786911  | -0.103189105 | 3.550796744 | 1.05437688  | NA          | NA |
| ASV_16s_13894 | 0.238518158 | -0.426588418 | 3.550664811 | 0.986237277 | 0.995047503 | NA |
| ASV_16s_13895 | 0.222409315 | -0.168377267 | 3.550703072 | 1.349504981 | 0.987067928 | NA |
| ASV_16s_13896 | 0.199695515 | -0.306033249 | 3.550556414 | 0.823282088 | 0.997199028 | NA |
| ASV_16s_13897 | 0.238910223 | -0.068414104 | 3.551051439 | 0.867074045 | NA          | NA |
| ASV_16s_13898 | 0.263396544 | -0.145296897 | 3.5511232   | 0.71067121  | 0.998252394 | NA |
| ASV_16s_13899 | 0.175527897 | 0.868886379  | 3.551000562 | 0.390351087 | 0.999757238 | NA |
| ASV_16s_13900 | 0.301840111 | 0.758940593  | 3.549802148 | 0.738677198 | 0.998020589 | NA |
| ASV_16s_13901 | 0.246753944 | -0.110787545 | 3.550755005 | 1.050784876 | 0.993967183 | NA |
| ASV_16s_13902 | 0.218205116 | -0.07215778  | 3.550820244 | 1.012046    | NA          | NA |
| ASV_16s_13903 | 0.277020141 | -0.133251563 | 3.550360335 | 0.840518059 | 0.99700813  | NA |
| ASV_16s_13904 | 0.228743405 | 1.576975464  | 3.550698348 | 0.411635968 | NA          | NA |
| ASV_16s_13905 | 0.239521747 | 0.292376458  | 3.551249757 | 0.648463766 | NA          | NA |
| ASV_16s_13906 | 0.217097069 | 1.237543058  | 3.550931482 | 0.667148903 | NA          | NA |
| ASV_16s_13907 | 0.212490145 | 0.3778412    | 3.551435794 | 0.691529889 | NA          | NA |
| ASV_16s_13908 | 0.26520162  | 0.391105907  | 3.551124167 | 0.766071365 | NA          | NA |
| ASV_16s_13909 | 0.323611434 | 0.401253868  | 3.550819228 | 0.831973007 | 0.997103802 | NA |
| ASV_16s_13910 | 0.16466717  | 0.356483468  | 3.551722491 | 0.605995672 | NA          | NA |
| ASV_16s_13911 | 0.192330803 | -0.995106257 | 3.550730162 | 0.374249801 | NA          | NA |
| ASV_16s_13912 | 0.243825293 | 1.283802246  | 3.550613928 | 0.646631061 | NA          | NA |
| ASV_16s_13913 | 0.155443116 | 1.056156082  | 3.55062164  | 0.311467817 | NA          | NA |
| ASV_16s_13914 | 0.25015348  | 0.412622588  | 3.550865693 | 0.679409531 | NA          | NA |
| ASV_16s_13915 | 0.227129107 | 0.404375633  | 3.550978061 | 0.647004745 | NA          | NA |
| ASV_16s_13916 | 0.236261649 | 0.785316933  | 3.550429097 | 1.155776668 | 0.991909742 | NA |
| ASV_16s_13917 | 0.187492397 | 0.387456325  | 3.551222345 | 0.583620226 | NA          | NA |
| ASV_16s_13918 | 0.261389772 | -0.07370117  | 3.550675365 | 1.057414684 | NA          | NA |
| ASV_16s_13919 | 0.070634167 | 0.342797287  | 3.551788638 | 0.297167064 | NA          | NA |
| ASV_16s_13920 | 0.229235544 | -0.072024256 | 3.550760686 | 0.956440985 | 0.995500934 | NA |
| ASV_16s_13921 | 0.113975279 | -0.443724304 | 3.551128012 | 0.428405986 | NA          | NA |
| ASV_16s_13922 | 0.113975279 | -0.443724304 | 3.551128012 | 0.428405986 | NA          | NA |
| ASV_16s_13923 | 0.138420362 | -0.49179157  | 3.550884035 | 0.4874729   | NA          | NA |
| ASV_16s_13924 | 0.126859283 | -0.471144464 | 3.551003592 | 0.46054357  | NA          | NA |
| ASV_16s_13925 | 0.126859283 | -0.471144464 | 3.551003592 | 0.46054357  | NA          | NA |
| ASV_16s_13926 | 0.100566041 | 1.025059717  | 3.551323499 | 0.358354432 | NA          | NA |
| ASV_16s_13927 | 0.199251162 | -0.078709377 | 3.550788804 | 0.93525182  | 0.995806504 | NA |
| ASV_16s_13928 | 0.136474274 | 0.220093012  | 3.55078873  | 0.593848028 | 0.999025168 | NA |
| ASV_16s_13929 | 0.137888096 | 0.220091365  | 3.55078656  | 0.598566095 | 0.998999605 | NA |
| ASV_16s_13930 | 0.144184768 | 0.22008443   | 3.55077741  | 0.619200035 | NA          | NA |
| ASV_16s_13931 | 0.146726786 | 0.351374505  | 3.55074885  | 0.983646467 | 0.995088045 | NA |
| ASV_16s_13932 | 0.151887274 | 0.595994978  | 3.550730813 | 0.578932176 | NA          | NA |
| ASV_16s_13933 | 0.151887274 | 0.595994978  | 3.550730813 | 0.578932176 | NA          | NA |
| ASV_16s_13934 | 0.171266331 | 0.351169908  | 3.551888937 | 0.526336129 | NA          | NA |
| ASV_16s_13935 | 0.229932909 | 0.09823776   | 3.550859101 | 1.254998645 | 0.98960495  | NA |
| ASV_16s_13936 | 0.271743654 | 0.331104238  | 3.550106731 | 1.503085545 | 0.982202646 | NA |
| ASV_16s_13937 | 0.198560051 | -0.343056578 | 3.5506519   | 0.989575968 | NA          | NA |
| ASV_16s_13938 | 0.300506483 | 1.760477417  | 3.550209793 | 0.471842981 | NA          | NA |
| ASV_16s_13939 | 0.205072494 | -0.068309737 | 3.550470876 | 1.238182331 | NA          | NA |
| ASV_16s_13940 | 0.229684168 | -0.061822686 | 3.550877078 | 0.964826354 | NA          | NA |
| ASV_16s_13941 | 0.205568013 | -0.068241384 | 3.550458634 | 1.242071913 | NA          | NA |
| ASV_16s_13942 | 0.206063531 | -0.068166954 | 3.550451061 | 1.242239027 | NA          | NA |

|               |             |              |             |             |             |    |
|---------------|-------------|--------------|-------------|-------------|-------------|----|
| ASV_16s_13943 | 0.207054568 | -0.067996482 | 3.550449811 | 1.239057056 | NA          | NA |
| ASV_16s_13944 | 0.185398241 | -0.545639114 | 3.550474625 | 0.648683259 | NA          | NA |
| ASV_16s_13945 | 0.300335171 | -0.503097877 | 3.55016714  | 0.87238899  | NA          | NA |
| ASV_16s_13946 | 0.193748946 | 0.036269702  | 3.550447725 | 1.397211728 | 0.985656513 | NA |
| ASV_16s_13947 | 0.233945362 | 0.309633752  | 3.550818859 | 0.71917379  | NA          | NA |
| ASV_16s_13948 | 0.268569089 | 0.341108385  | 3.551035954 | 0.685614898 | 0.99844384  | NA |
| ASV_16s_13949 | 0.335140702 | 0.2649961    | 3.550943258 | 0.963827869 | 0.995391129 | NA |
| ASV_16s_13950 | 0.228736703 | -0.177747292 | 3.550422496 | 0.952379978 | NA          | NA |
| ASV_16s_13951 | 0.217658664 | -0.041669229 | 3.550783228 | 1.115976967 | NA          | NA |
| ASV_16s_13952 | 0.257245237 | -0.547419208 | 3.549975984 | 0.683086849 | NA          | NA |
| ASV_16s_13953 | 0.257245237 | -0.547419208 | 3.549975984 | 0.683086849 | NA          | NA |
| ASV_16s_13954 | 0.256467808 | 1.073233445  | 3.55065855  | 1.114644142 | NA          | NA |
| ASV_16s_13955 | 0.162536966 | -0.078503273 | 3.550850491 | 0.836433184 | NA          | NA |
| ASV_16s_13956 | 0.188104688 | -0.116752506 | 3.550356184 | 1.114481697 | NA          | NA |
| ASV_16s_13957 | 0.335322075 | 0.737709063  | 3.55020461  | 1.863047645 | 0.967029893 | NA |
| ASV_16s_13958 | 0.342922186 | 0.525471072  | 3.550838323 | 1.374305906 | 0.986345283 | NA |
| ASV_16s_13959 | 0.276121419 | 0.550098955  | 3.550777637 | 1.104056748 | 0.992970904 | NA |
| ASV_16s_13960 | 0.298027348 | 0.36501347   | 3.550360832 | 1.346258152 | 0.987160764 | NA |
| ASV_16s_13961 | 0.214444744 | -0.028848342 | 3.550897864 | 1.030696331 | NA          | NA |
| ASV_16s_13962 | 0.214444744 | -0.028848342 | 3.550897864 | 1.030696331 | NA          | NA |
| ASV_16s_13963 | 0.199659566 | -0.471001118 | 3.550652814 | 0.735275114 | NA          | NA |
| ASV_16s_13964 | 0.178960316 | -0.073508493 | 3.550850012 | 0.906968541 | NA          | NA |
| ASV_16s_13965 | 0.227711031 | 0.336056758  | 3.550302034 | 1.276813355 | NA          | NA |
| ASV_16s_13966 | 0.248497565 | 0.347349612  | 3.550299433 | 1.317496437 | NA          | NA |
| ASV_16s_13967 | 0.27642859  | 0.354575408  | 3.550300795 | 1.321821724 | NA          | NA |
| ASV_16s_13968 | 0.244621939 | 0.360347907  | 3.551009038 | 1.080139968 | NA          | NA |
| ASV_16s_13969 | 0.235511089 | 0.354172578  | 3.551073229 | 0.773899039 | NA          | NA |
| ASV_16s_13970 | 0.232595617 | 0.343056891  | 3.551035887 | 0.781750449 | NA          | NA |
| ASV_16s_13971 | 0.401703948 | 0.360397502  | 3.550847143 | 1.331301944 | NA          | NA |
| ASV_16s_13972 | 0.217460453 | 0.360332129  | 3.55106057  | 1.021111655 | NA          | NA |
| ASV_16s_13973 | 0.217460453 | 0.360332129  | 3.55106057  | 1.021111655 | NA          | NA |
| ASV_16s_13974 | 0.217460453 | 0.360332129  | 3.55106057  | 1.021111655 | NA          | NA |
| ASV_16s_13975 | 0.268008292 | 0.764312244  | 3.550370486 | 1.365942351 | NA          | NA |
| ASV_16s_13976 | 0.243399029 | 0.495109814  | 3.550971379 | 1.618333362 | 0.977928021 | NA |
| ASV_16s_13977 | 0.257860295 | 0.315939539  | 3.550865633 | 1.067737777 | 0.99366059  | NA |
| ASV_16s_13978 | 0.24774293  | 0.315939551  | 3.55087695  | 1.047555528 | 0.994024492 | NA |
| ASV_16s_13979 | 0.241925605 | 0.315939559  | 3.550883886 | 1.035601951 | 0.994233602 | NA |
| ASV_16s_13980 | 0.23658422  | 0.315939567  | 3.550890549 | 1.024396219 | 0.994425333 | NA |
| ASV_16s_13981 | 0.236026193 | 0.315939568  | 3.550891261 | 1.023218753 | 0.994445239 | NA |
| ASV_16s_13982 | 0.319083613 | 0.315939485  | 3.550812415 | 1.175417289 | 0.991481938 | NA |
| ASV_16s_13983 | 0.233630824 | 0.315939571  | 3.550894364 | 1.018098699 | 0.994531272 | NA |
| ASV_16s_13984 | 0.233288628 | 0.315939572  | 3.550894812 | 1.01736322  | 0.994543559 | NA |
| ASV_16s_13985 | 0.262182192 | 0.315939534  | 3.550861088 | 1.075903962 | 0.993509442 | NA |
| ASV_16s_13986 | 0.260572393 | 0.315939536  | 3.550862764 | 1.072940628 | 0.993564552 | NA |
| ASV_16s_13987 | 0.227129107 | 0.315939679  | 3.550903113 | 1.003947589 | NA          | NA |
| ASV_16s_13988 | 0.277247552 | 0.315939518  | 3.550846278 | 1.104129587 | 0.992969475 | NA |
| ASV_16s_13989 | 0.301423675 | 1.120814475  | 3.550554262 | 0.843204824 | NA          | NA |
| ASV_16s_13990 | 0.315253007 | 0.734429431  | 3.550917012 | 1.144838036 | 0.992142033 | NA |
| ASV_16s_13991 | 0.16778992  | 0.733407395  | 3.551214225 | 0.833025695 | 0.997092125 | NA |
| ASV_16s_13992 | 0.300463899 | 0.734373222  | 3.550933729 | 1.12055997  | NA          | NA |
| ASV_16s_13993 | 0.300463899 | 0.734373222  | 3.550933729 | 1.12055997  | NA          | NA |
| ASV_16s_13994 | 0.300463899 | 0.734373222  | 3.550933729 | 1.12055997  | NA          | NA |
| ASV_16s_13995 | 0.300463899 | 0.734373222  | 3.550933729 | 1.12055997  | NA          | NA |
| ASV_16s_13996 | 0.300463899 | 0.734373222  | 3.550933729 | 1.12055997  | NA          | NA |
| ASV_16s_13997 | 0.300463899 | 0.734373222  | 3.550933729 | 1.12055997  | NA          | NA |
| ASV_16s_13998 | 0.300463899 | 0.734373222  | 3.550933729 | 1.12055997  | NA          | NA |
| ASV_16s_13999 | 0.260844819 | 0.693205399  | 3.550836516 | 1.00867788  | 0.994687333 | NA |
| ASV_16s_14000 | 0.283131931 | 0.693281759  | 3.55081423  | 1.049917216 | 0.993982615 | NA |
| ASV_16s_14001 | 0.273256097 | 0.6932482    | 3.550823669 | 1.031992295 | 0.994295815 | NA |
| ASV_16s_14002 | 0.287260029 | 0.693296198  | 3.550810482 | 1.057211881 | NA          | NA |
| ASV_16s_14003 | 0.287260029 | 0.693296198  | 3.550810482 | 1.057211881 | NA          | NA |
| ASV_16s_14004 | 0.309495583 | 0.693358     | 3.550792002 | 1.09483737  | 0.99315026  | NA |
| ASV_16s_14005 | 0.452449331 | 1.203254188  | 3.549912819 | 0.903906561 | NA          | NA |
| ASV_16s_14006 | 0.206742408 | 0.018513536  | 3.550905141 | 0.996875395 | NA          | NA |
| ASV_16s_14007 | 0.19484924  | -0.028354817 | 3.550917425 | 1.042438597 | NA          | NA |
| ASV_16s_14008 | 0.195367078 | -0.063789601 | 3.550855499 | 1.080157259 | NA          | NA |
| ASV_16s_14009 | 0.191844887 | -0.118161831 | 3.550812301 | 1.118949495 | 0.992674956 | NA |

|               |             |              |             |             |             |    |
|---------------|-------------|--------------|-------------|-------------|-------------|----|
| ASV_16s_14010 | 0.196402753 | -0.129258182 | 3.550758889 | 1.136686358 | 0.992312383 | NA |
| ASV_16s_14011 | 0.191850591 | -0.133766712 | 3.550794522 | 1.12971654  | 0.992456176 | NA |
| ASV_16s_14012 | 0.196661672 | -0.14476948  | 3.550739113 | 1.147527422 | 0.992085316 | NA |
| ASV_16s_14013 | 0.196661672 | -0.14476948  | 3.550739113 | 1.147527422 | 0.992085316 | NA |
| ASV_16s_14014 | 0.191861999 | -0.164443279 | 3.55076407  | 1.147775381 | 0.992080074 | NA |
| ASV_16s_14015 | 0.191861999 | -0.164443279 | 3.55076407  | 1.147775381 | 0.992080074 | NA |
| ASV_16s_14016 | 0.200573536 | -0.181740562 | 3.550669168 | 1.176884556 | 0.991449423 | NA |
| ASV_16s_14017 | 0.197438428 | -0.190371042 | 3.550690967 | 1.172792394 | 0.991539914 | NA |
| ASV_16s_14018 | 0.208289326 | -0.237141648 | 3.550570771 | 1.209575581 | 0.990704748 | NA |
| ASV_16s_14019 | 0.198215185 | -0.235396456 | 3.550657977 | 1.177139124 | 0.991443774 | NA |
| ASV_16s_14020 | 0.210098796 | -0.267614236 | 3.550546893 | 1.209001475 | 0.990718162 | NA |
| ASV_16s_14021 | 0.198733023 | -0.265476925 | 3.550643558 | 1.166516252 | 0.99167753  | NA |
| ASV_16s_14022 | 0.198991942 | -0.280819574 | 3.550637416 | 1.157786965 | 0.991866589 | NA |
| ASV_16s_14023 | 0.195199424 | -0.29061019  | 3.550669964 | 1.13437104  | 0.992360339 | NA |
| ASV_16s_14024 | 0.19925086  | -0.296356959 | 3.550632297 | 1.147574331 | 0.992084324 | NA |
| ASV_16s_14025 | 0.195452639 | -0.290975529 | 3.550667559 | 1.135206217 | 0.992343062 | NA |
| ASV_16s_14026 | 0.195959068 | -0.291703697 | 3.55066277  | 1.136872174 | 0.992308526 | NA |
| ASV_16s_14027 | 0.196971927 | -0.293150093 | 3.550653274 | 1.140186643 | 0.992239523 | NA |
| ASV_16s_14028 | 0.211153667 | -0.341691618 | 3.550532077 | 1.152544295 | 0.991978827 | NA |
| ASV_16s_14029 | 0.227026738 | -0.388143664 | 3.550424349 | 1.16172618  | 0.99178161  | NA |
| ASV_16s_14030 | 0.270651522 | -0.678402992 | 3.550376023 | 0.79172108  | 0.997527527 | NA |
| ASV_16s_14031 | 0.249542035 | -0.671130779 | 3.550492497 | 0.764857229 | 0.997786276 | NA |
| ASV_16s_14032 | 0.256675029 | -0.674259121 | 3.550453656 | 0.77423607  | 0.997698079 | NA |
| ASV_16s_14033 | 0.233342433 | -0.661415931 | 3.55057898  | 0.742362006 | 0.997988654 | NA |
| ASV_16s_14034 | 0.221994254 | -0.652761817 | 3.550639805 | 0.725656561 | NA          | NA |
| ASV_16s_14035 | 0.197074601 | -0.629458782 | 3.550786047 | 0.685730326 | 0.998442992 | NA |
| ASV_16s_14036 | 0.192010305 | -0.622359867 | 3.55081269  | 0.676762194 | NA          | NA |
| ASV_16s_14037 | 0.192010305 | -0.622359867 | 3.55081269  | 0.676762194 | NA          | NA |
| ASV_16s_14038 | 0.192010305 | -0.622359867 | 3.55081269  | 0.676762194 | NA          | NA |
| ASV_16s_14039 | 0.192010305 | -0.622359867 | 3.55081269  | 0.676762194 | NA          | NA |
| ASV_16s_14040 | 0.061175711 | -0.168816911 | 3.550940148 | 0.301083315 | NA          | NA |
| ASV_16s_14042 | 0.217838475 | -0.041335387 | 3.550510793 | 1.164857819 | 0.991713658 | NA |
| ASV_16s_14043 | 0.258470082 | -0.664360384 | 3.550595282 | 0.7548763   | 0.997877653 | NA |
| ASV_16s_14044 | 0.205030245 | -0.413056021 | 3.550733385 | 0.622821296 | 0.998861045 | NA |
| ASV_16s_14045 | 0.085254437 | -0.147026425 | 3.551226172 | 0.244743617 | 0.99994988  | NA |
| ASV_16s_14046 | 0.208638663 | -0.00920376  | 3.550470634 | 1.097092182 | 0.993106665 | NA |
| ASV_16s_14047 | 0.223199851 | -0.661668779 | 3.550657808 | 0.685607597 | 0.998443894 | NA |
| ASV_16s_14048 | 0.217530244 | 0.185812899  | 3.550584116 | 1.009961532 | 0.994666239 | NA |
| ASV_16s_14049 | 0.212585173 | 0.755203648  | 3.551578376 | 0.702520796 | NA          | NA |
| ASV_16s_14050 | 0.198229382 | 0.816415799  | 3.551618873 | 0.678036392 | NA          | NA |
| ASV_16s_14051 | 0.19744224  | 0.064035078  | 3.550462937 | 1.083074738 | 0.993374849 | NA |
| ASV_16s_14052 | 0.259548125 | -0.731147735 | 3.550243659 | 0.950255706 | 0.995591568 | NA |
| ASV_16s_14053 | 0.197163696 | 0.384445377  | 3.550805532 | 1.021293123 | 0.994477696 | NA |
| ASV_16s_14054 | 0.2152608   | 0.157941551  | 3.550349259 | 1.210034169 | 0.990694025 | NA |
| ASV_16s_14055 | 0.270779648 | -0.774719686 | 3.550381449 | 0.866776562 | 0.996701264 | NA |
| ASV_16s_14056 | 0.242617822 | -0.670017954 | 3.550355005 | 0.701763583 | NA          | NA |
| ASV_16s_14057 | 0.180217657 | 0.050393247  | 3.550884535 | 1.089471505 | 0.993253301 | NA |
| ASV_16s_14058 | 0.216421431 | 0.15385712   | 3.550312295 | 1.185521133 | 0.991256458 | NA |
| ASV_16s_14059 | 0.202354797 | -0.190112333 | 3.550412702 | 0.905575139 | NA          | NA |
| ASV_16s_14060 | 0.230543076 | 0.313029232  | 3.551996197 | 0.44934405  | NA          | NA |
| ASV_16s_14061 | 0.230982988 | 0.723831239  | 3.551312678 | 1.051434858 | NA          | NA |
| ASV_16s_14062 | 0.229554705 | 0.335316896  | 3.550449534 | 1.188883195 | 0.991180611 | NA |
| ASV_16s_14063 | 0.237157135 | -0.355792617 | 3.550565924 | 1.010427479 | 0.994658568 | NA |
| ASV_16s_14064 | 0.199959369 | -0.240931908 | 3.551169663 | 0.966535165 | 0.995350458 | NA |
| ASV_16s_14065 | 0.227905607 | 0.384988791  | 3.550681939 | 1.194970421 | 0.991042242 | NA |
| ASV_16s_14066 | 0.240769539 | 0.253871266  | 3.550190148 | 1.261340163 | 0.989445306 | NA |
| ASV_16s_14067 | 0.171186127 | 0.66047429   | 3.551661616 | 0.846123191 | NA          | NA |
| ASV_16s_14068 | 0.255676024 | -0.614575175 | 3.550206289 | 1.135913463 | NA          | NA |
| ASV_16s_14069 | 0.203879949 | 0.676313884  | 3.551073107 | 0.938968116 | NA          | NA |
| ASV_16s_14070 | 0.249889269 | -0.578620952 | 3.550278014 | 1.131007772 | NA          | NA |
| ASV_16s_14071 | 0.254449516 | -0.58289522  | 3.550256514 | 1.146477725 | NA          | NA |
| ASV_16s_14072 | 0.232833068 | 0.021203321  | 3.55004796  | 0.83815047  | 0.997034842 | NA |
| ASV_16s_14073 | 0.250080163 | -0.516670577 | 3.550381892 | 1.14167807  | 0.992208347 | NA |
| ASV_16s_14074 | 0.248503455 | -0.082399955 | 3.55122177  | 0.816744478 | 0.997269292 | NA |
| ASV_16s_14075 | 0.266181354 | -0.50329911  | 3.550383509 | 1.209575083 | NA          | NA |
| ASV_16s_14076 | 0.244648865 | -0.413871285 | 3.550526526 | 1.109970007 | 0.992854319 | NA |
| ASV_16s_14077 | 0.18793321  | -0.617364212 | 3.5507453   | 0.603821011 | NA          | NA |



|               |             |              |             |             |             |    |
|---------------|-------------|--------------|-------------|-------------|-------------|----|
| ASV_16s_14078 | 0.235908875 | 0.017700168  | 3.550463524 | 1.159653557 | 0.991826391 | NA |
| ASV_16s_14079 | 0.231981806 | -0.056432846 | 3.551100173 | 0.829741814 | NA          | NA |
| ASV_16s_14080 | 0.227656324 | 0.664340249  | 3.550220971 | 0.976355405 | NA          | NA |
| ASV_16s_14081 | 0.240413065 | -0.056106869 | 3.550782576 | 1.026052696 | 0.994397251 | NA |
| ASV_16s_14082 | 0.180398031 | -0.2866584   | 3.550866845 | 0.723026209 | NA          | NA |
| ASV_16s_14083 | 0.242662631 | 1.38543733   | 3.550962287 | 0.63053182  | 0.998814439 | NA |
| ASV_16s_14084 | 0.212574214 | 1.231540551  | 3.550950876 | 0.659716782 | NA          | NA |
| ASV_16s_14085 | 0.265389812 | 1.614132371  | 3.550680369 | 0.513247192 | 0.999396515 | NA |
| ASV_16s_14086 | 0.239193916 | 1.262056069  | 3.550833878 | 0.700949101 | NA          | NA |
| ASV_16s_14087 | 0.235835458 | 1.057885598  | 3.550487481 | 0.775214914 | 0.997688742 | NA |
| ASV_16s_14088 | 0.198955306 | 0.364892503  | 3.551136971 | 0.839057201 | 0.99702463  | NA |
| ASV_16s_14089 | 0.251885962 | 0.387497118  | 3.55120203  | 0.748795396 | NA          | NA |
| ASV_16s_14090 | 0.288083928 | -0.709279916 | 3.550304712 | 0.90335693  | 0.996240615 | NA |
| ASV_16s_14091 | 0.187200136 | -0.363927708 | 3.551211013 | 0.549808383 | 0.999242895 | NA |
| ASV_16s_14092 | 0.161236604 | 0.354684331  | 3.551742824 | 0.59897325  | NA          | NA |
| ASV_16s_14093 | 0.269780856 | -0.563361266 | 3.55018003  | 0.76861905  | NA          | NA |
| ASV_16s_14094 | 0.284420578 | 0.351994781  | 3.549437761 | 0.879155556 | NA          | NA |
| ASV_16s_14095 | 0.163570034 | -0.889839808 | 3.550894249 | 0.32439049  | NA          | NA |
| ASV_16s_14096 | 0.219078717 | -1.017338021 | 3.550564699 | 0.439361027 | 0.999639625 | NA |
| ASV_16s_14097 | 0.213554329 | -0.553403473 | 3.550544247 | 0.693626337 | NA          | NA |
| ASV_16s_14098 | 0.23339804  | 1.274500066  | 3.550653463 | 0.631496043 | NA          | NA |
| ASV_16s_14099 | 0.124602204 | 1.095421213  | 3.551154731 | 0.421275968 | NA          | NA |
| ASV_16s_14100 | 0.124602204 | 1.095421213  | 3.551154731 | 0.421275968 | NA          | NA |
| ASV_16s_14101 | 0.213612072 | 1.254446412  | 3.550733029 | 0.600865614 | NA          | NA |
| ASV_16s_14102 | 0.294414943 | 1.320836844  | 3.550452384 | 0.711525163 | NA          | NA |
| ASV_16s_14103 | 0.279477583 | 0.002775912  | 3.549743162 | 1.205665301 | NA          | NA |
| ASV_16s_14104 | 0.222397251 | 0.402513075  | 3.551003227 | 0.639920157 | NA          | NA |
| ASV_16s_14105 | 0.161105594 | 0.011474417  | 3.550686318 | 0.914142368 | 0.996097251 | NA |
| ASV_16s_14106 | 0.183586305 | 0.385262046  | 3.551248094 | 0.576679687 | NA          | NA |
| ASV_16s_14107 | 0.195972777 | -0.071873287 | 3.550816034 | 0.819228216 | NA          | NA |
| ASV_16s_14108 | 0.069162622 | 0.342708574  | 3.551793465 | 0.292155621 | NA          | NA |
| ASV_16s_14109 | 0.122583322 | 0.227872929  | 3.550913466 | 0.361161579 | NA          | NA |
| ASV_16s_14110 | 0.111600794 | -0.438370467 | 3.551149586 | 0.422198453 | NA          | NA |
| ASV_16s_14111 | 0.111600794 | -0.438370467 | 3.551149586 | 0.422198453 | NA          | NA |
| ASV_16s_14112 | 0.111600794 | -0.438370467 | 3.551149586 | 0.422198453 | NA          | NA |
| ASV_16s_14113 | 0.111600794 | -0.438370467 | 3.551149586 | 0.422198453 | NA          | NA |
| ASV_16s_14114 | 0.265462041 | 0.747105031  | 3.550026732 | 1.064970675 | NA          | NA |
| ASV_16s_14115 | 0.135536604 | -0.486922007 | 3.550912835 | 0.480894671 | NA          | NA |
| ASV_16s_14116 | 0.135536604 | -0.486922007 | 3.550912835 | 0.480894671 | NA          | NA |
| ASV_16s_14117 | 0.135536604 | -0.486922007 | 3.550912835 | 0.480894671 | NA          | NA |
| ASV_16s_14118 | 0.124216382 | -0.465640572 | 3.551029924 | 0.454097524 | NA          | NA |
| ASV_16s_14119 | 0.124216382 | -0.465640572 | 3.551029924 | 0.454097524 | NA          | NA |
| ASV_16s_14120 | 0.124216382 | -0.465640572 | 3.551029924 | 0.454097524 | NA          | NA |
| ASV_16s_14121 | 0.222397251 | -0.07880604  | 3.550760346 | 0.989579203 | NA          | NA |
| ASV_16s_14122 | 0.222397251 | -0.07880604  | 3.550760346 | 0.989579203 | NA          | NA |
| ASV_16s_14123 | 0.189640665 | -0.078664599 | 3.550802663 | 0.910983779 | NA          | NA |
| ASV_16s_14124 | 0.189640665 | -0.078664599 | 3.550802663 | 0.910983779 | NA          | NA |
| ASV_16s_14125 | 0.124286578 | 0.220108795  | 3.550809481 | 0.551743452 | NA          | NA |
| ASV_16s_14126 | 0.130295323 | 0.220100652  | 3.550798772 | 0.572808334 | 0.999133817 | NA |
| ASV_16s_14127 | 0.133829879 | 0.220096208  | 3.550792919 | 0.584886658 | 0.999072503 | NA |
| ASV_16s_14128 | 0.135315683 | 0.22009427   | 3.550790548 | 0.589915935 | 0.999046133 | NA |
| ASV_16s_14129 | 0.141180918 | 0.220087687  | 3.550781681 | 0.609407699 | NA          | NA |
| ASV_16s_14130 | 0.141180918 | 0.220087687  | 3.550781681 | 0.609407699 | NA          | NA |
| ASV_16s_14131 | 0.141180918 | 0.220087687  | 3.550781681 | 0.609407699 | NA          | NA |
| ASV_16s_14132 | 0.232893061 | 0.310939138  | 3.55086902  | 0.993640767 | 0.994930468 | NA |
| ASV_16s_14133 | 0.217032795 | 1.490999362  | 3.550795907 | 0.480093058 | NA          | NA |
| ASV_16s_14134 | 0.19410033  | -0.068185623 | 3.550743587 | 1.051267814 | NA          | NA |
| ASV_16s_14135 | 0.282985708 | -0.11807429  | 3.550667958 | 0.974720757 | 0.995226083 | NA |
| ASV_16s_14136 | 0.181321294 | 0.632711311  | 3.550459088 | 0.879480152 | NA          | NA |
| ASV_16s_14137 | 0.228969569 | 0.243065055  | 3.550383504 | 0.719793095 | NA          | NA |
| ASV_16s_14138 | 0.219174366 | -0.068226134 | 3.550579461 | 1.236437667 | NA          | NA |
| ASV_16s_14139 | 0.198064477 | -0.068750449 | 3.55062646  | 1.175136124 | NA          | NA |
| ASV_16s_14140 | 0.242884709 | -0.117303973 | 3.550093021 | 1.319604655 | NA          | NA |
| ASV_16s_14141 | 0.199055513 | -0.068493963 | 3.550578556 | 1.194849907 | NA          | NA |
| ASV_16s_14142 | 0.207692616 | 0.739926412  | 3.55144297  | 0.928039801 | 0.99590736  | NA |
| ASV_16s_14143 | 0.235252949 | 0.658747517  | 3.551109346 | 0.789430734 | 0.997550326 | NA |
| ASV_16s_14144 | 0.199551032 | -0.068437665 | 3.550549742 | 1.202905983 | NA          | NA |

|               |             |              |             |             |             |    |
|---------------|-------------|--------------|-------------|-------------|-------------|----|
| ASV_16s_14145 | 0.214467813 | 0.32401577   | 3.551830976 | 0.557858742 | NA          | NA |
| ASV_16s_14146 | 0.200542068 | -0.06830779  | 3.550508521 | 1.216097882 | NA          | NA |
| ASV_16s_14147 | 0.231035941 | 1.532004393  | 3.550835757 | 0.416020896 | 0.999699607 | NA |
| ASV_16s_14148 | 0.325945357 | 0.084984954  | 3.550910651 | 0.845046207 | NA          | NA |
| ASV_16s_14149 | 0.213635788 | 0.202612463  | 3.5502965   | 0.879441888 | 0.996546197 | NA |
| ASV_16s_14150 | 0.337536343 | 0.300605531  | 3.551845653 | 0.55517737  | 0.999218317 | NA |
| ASV_16s_14151 | 0.218008234 | 1.022751743  | 3.55073356  | 1.042027218 | NA          | NA |
| ASV_16s_14152 | 0.204010697 | -0.067635894 | 3.550506951 | 1.199437256 | NA          | NA |
| ASV_16s_14153 | 0.21332645  | -0.067916315 | 3.550422905 | 1.235061507 | NA          | NA |
| ASV_16s_14154 | 0.28284412  | 0.386266898  | 3.549974549 | 1.322607136 | 0.987824732 | NA |
| ASV_16s_14155 | 0.214066101 | 0.150292517  | 3.550478963 | 1.179805643 | NA          | NA |
| ASV_16s_14156 | 0.247887766 | 0.317392224  | 3.550941721 | 0.767752176 | 0.997759295 | NA |
| ASV_16s_14157 | 0.178321062 | -0.413704438 | 3.550739344 | 0.697293865 | NA          | NA |
| ASV_16s_14158 | 0.231445464 | 0.320807851  | 3.551054473 | 0.80573301  | 0.997385005 | NA |
| ASV_16s_14159 | 0.24307212  | 0.556853008  | 3.550876012 | 1.353851886 | 0.986942997 | NA |
| ASV_16s_14160 | 0.167228557 | 0.279429497  | 3.551614825 | 0.624367519 | NA          | NA |
| ASV_16s_14161 | 0.159878123 | 0.279884856  | 3.551625239 | 0.608327116 | NA          | NA |
| ASV_16s_14162 | 0.133129966 | 0.281716157  | 3.551669716 | 0.544665208 | NA          | NA |
| ASV_16s_14163 | 0.161577426 | -0.478501094 | 3.551294101 | 0.605135972 | NA          | NA |
| ASV_16s_14164 | 0.284738508 | 0.346065359  | 3.551131338 | 0.598029834 | NA          | NA |
| ASV_16s_14165 | 0.217503021 | -0.116022404 | 3.550328056 | 1.20750433  | 0.990753085 | NA |
| ASV_16s_14166 | 0.318813724 | 0.208865701  | 3.549724164 | 1.335735791 | 0.987458828 | NA |
| ASV_16s_14167 | 0.272847236 | 0.352871882  | 3.550226628 | 1.369116381 | 0.986498476 | NA |
| ASV_16s_14168 | 0.289725657 | 0.512679867  | 3.550869898 | 1.656832159 | NA          | NA |
| ASV_16s_14169 | 0.232958785 | 0.340265441  | 3.550275889 | 1.289379716 | NA          | NA |
| ASV_16s_14170 | 0.195482573 | 0.249681193  | 3.550684271 | 1.057642905 | NA          | NA |
| ASV_16s_14171 | 0.3133927   | 0.724779963  | 3.550100401 | 1.02592718  | NA          | NA |
| ASV_16s_14172 | 0.237226107 | 0.337327333  | 3.550255019 | 1.31311584  | 0.988085137 | NA |
| ASV_16s_14173 | 0.247850425 | 0.335749361  | 3.550220128 | 1.354174527 | NA          | NA |
| ASV_16s_14174 | 0.239525649 | 0.360345221  | 3.551017837 | 1.069506663 | NA          | NA |
| ASV_16s_14175 | 0.234788007 | 0.361027907  | 3.551303957 | 0.810447249 | NA          | NA |
| ASV_16s_14176 | 0.236298839 | 0.35801493   | 3.551094816 | 0.77677524  | 0.997673808 | NA |
| ASV_16s_14177 | 0.277149196 | 0.342727029  | 3.550906091 | 0.859436726 | 0.996789014 | NA |
| ASV_16s_14178 | 0.212930026 | 0.360329115  | 3.551070451 | 1.010559531 | NA          | NA |
| ASV_16s_14179 | 0.212930026 | 0.360329115  | 3.551070451 | 1.010559531 | NA          | NA |
| ASV_16s_14180 | 0.212930026 | 0.360329115  | 3.551070451 | 1.010559531 | NA          | NA |
| ASV_16s_14181 | 0.212930026 | 0.360329115  | 3.551070451 | 1.010559531 | NA          | NA |
| ASV_16s_14182 | 0.212930026 | 0.360329115  | 3.551070451 | 1.010559531 | NA          | NA |
| ASV_16s_14183 | 0.212930026 | 0.360329115  | 3.551070451 | 1.010559531 | NA          | NA |
| ASV_16s_14184 | 0.212930026 | 0.360329115  | 3.551070451 | 1.010559531 | NA          | NA |
| ASV_16s_14185 | 0.212930026 | 0.360329115  | 3.551070451 | 1.010559531 | NA          | NA |
| ASV_16s_14186 | 0.306275731 | 0.315939509  | 3.550821799 | 1.154665702 | 0.991933529 | NA |
| ASV_16s_14187 | 0.23810873  | 0.315939583  | 3.550888629 | 1.027567366 | 0.994371494 | NA |
| ASV_16s_14188 | 0.238480445 | 0.315939665  | 3.550888158 | 1.028370719 | NA          | NA |
| ASV_16s_14189 | 0.228898967 | 0.315939597  | 3.550900693 | 1.007790306 | 0.994701887 | NA |
| ASV_16s_14190 | 0.228214576 | 0.315939598  | 3.550901628 | 1.006289326 | 0.994726442 | NA |
| ASV_16s_14191 | 0.226845794 | 0.3159396    | 3.550903516 | 1.003274584 | 0.99477554  | NA |
| ASV_16s_14192 | 0.253853197 | 0.315939561  | 3.55087004  | 1.059689118 | 0.993807355 | NA |
| ASV_16s_14193 | 0.222397251 | 0.315939696  | 3.550909812 | 0.993361068 | NA          | NA |
| ASV_16s_14194 | 0.222397251 | 0.315939696  | 3.550909812 | 0.993361068 | NA          | NA |
| ASV_16s_14195 | 0.222397251 | 0.315939696  | 3.550909812 | 0.993361068 | NA          | NA |
| ASV_16s_14196 | 0.222397251 | 0.315939696  | 3.550909812 | 0.993361068 | NA          | NA |
| ASV_16s_14197 | 0.294204234 | 0.734347119  | 3.550941322 | 1.10988305  | NA          | NA |
| ASV_16s_14198 | 0.294204234 | 0.734347119  | 3.550941322 | 1.10988305  | NA          | NA |
| ASV_16s_14199 | 0.294204234 | 0.734347119  | 3.550941322 | 1.10988305  | NA          | NA |
| ASV_16s_14200 | 0.145735734 | 0.731990469  | 3.551307269 | 0.768383061 | NA          | NA |
| ASV_16s_14201 | 0.145735734 | 0.731990469  | 3.551307269 | 0.768383061 | NA          | NA |
| ASV_16s_14202 | 0.278798586 | 0.693268206  | 3.550818294 | 1.042106155 | 0.994120409 | NA |
| ASV_16s_14203 | 0.281275445 | 0.693277594  | 3.550815962 | 1.046559015 | NA          | NA |
| ASV_16s_14204 | 0.281275445 | 0.693277594  | 3.550815962 | 1.046559015 | NA          | NA |
| ASV_16s_14205 | 0.222397251 | 0.693040479  | 3.550885401 | 0.929120005 | NA          | NA |
| ASV_16s_14206 | 0.222397251 | 0.693040479  | 3.550885401 | 0.929120005 | NA          | NA |
| ASV_16s_14207 | 0.187662592 | 0.286560613  | 3.551612323 | 0.649564879 | NA          | NA |
| ASV_16s_14208 | 0.187662592 | 0.286560613  | 3.551612323 | 0.649564879 | NA          | NA |
| ASV_16s_14209 | 0.187662592 | 0.286560613  | 3.551612323 | 0.649564879 | NA          | NA |
| ASV_16s_14210 | 0.203168105 | -0.037926703 | 3.550831091 | 1.057945527 | NA          | NA |
| ASV_16s_14211 | 0.190769619 | -0.031697141 | 3.550943816 | 1.030744273 | NA          | NA |

|               |             |              |             |             |             |    |
|---------------|-------------|--------------|-------------|-------------|-------------|----|
| ASV_16s_14212 | 0.187742449 | -0.056641962 | 3.550929422 | 1.051470447 | NA          | NA |
| ASV_16s_14213 | 0.189284554 | -0.127312856 | 3.550824229 | 1.110792259 | 0.992838011 | NA |
| ASV_16s_14214 | 0.192840969 | -0.166610843 | 3.550754005 | 1.142159518 | 0.992198267 | NA |
| ASV_16s_14215 | 0.193099888 | -0.182109943 | 3.550738334 | 1.149958414 | 0.992033827 | NA |
| ASV_16s_14216 | 0.190579148 | -0.206984311 | 3.550742749 | 1.148283461 | 0.992069325 | NA |
| ASV_16s_14217 | 0.197695164 | -0.234512941 | 3.550663223 | 1.172468218 | 0.991547056 | NA |
| ASV_16s_14218 | 0.193876645 | -0.228141876 | 3.550701434 | 1.160731148 | 0.991803128 | NA |
| ASV_16s_14219 | 0.190354454 | -0.282677569 | 3.550713478 | 1.117955092 | 0.992694958 | NA |
| ASV_16s_14220 | 0.218420623 | -0.335279689 | 3.550475423 | 1.190064958 | 0.991153854 | NA |
| ASV_16s_14221 | 0.195171239 | -0.306131043 | 3.550668494 | 1.122284888 | 0.992607617 | NA |
| ASV_16s_14222 | 0.191890855 | -0.332669783 | 3.550694129 | 1.084758453 | 0.993342992 | NA |
| ASV_16s_14223 | 0.213389805 | -0.390448055 | 3.550526789 | 1.109907098 | 0.992855565 | NA |
| ASV_16s_14224 | 0.187856531 | -0.375908406 | 3.550730314 | 1.022390317 | NA          | NA |
| ASV_16s_14225 | 0.192667611 | -0.383149003 | 3.550694341 | 1.035907699 | 0.994228312 | NA |
| ASV_16s_14226 | 0.196724752 | -0.405622637 | 3.550669143 | 1.026607471 | NA          | NA |
| ASV_16s_14227 | 0.206360693 | -0.451239032 | 3.550615037 | 1.003953355 | 0.994764511 | NA |
| ASV_16s_14228 | 0.067087117 | -0.277027571 | 3.551707938 | 0.353644979 | NA          | NA |
| ASV_16s_14229 | 0.269470709 | -0.678170294 | 3.550382809 | 0.790257593 | 0.997542111 | NA |
| ASV_16s_14230 | 0.256030931 | -0.673992238 | 3.550457248 | 0.773367963 | NA          | NA |
| ASV_16s_14231 | 0.258816985 | -0.675117677 | 3.550442232 | 0.776964506 | 0.997671992 | NA |
| ASV_16s_14232 | 0.243976146 | -0.667858212 | 3.550521122 | 0.757257457 | 0.997856084 | NA |
| ASV_16s_14233 | 0.249372036 | -0.671019824 | 3.550493458 | 0.764587195 | 0.997788782 | NA |
| ASV_16s_14234 | 0.187924979 | -0.616314324 | 3.550834348 | 0.669320249 | NA          | NA |
| ASV_16s_14235 | 0.187924979 | -0.616314324 | 3.550834348 | 0.669320249 | NA          | NA |
| ASV_16s_14236 | 0.187924979 | -0.616314324 | 3.550834348 | 0.669320249 | NA          | NA |
| ASV_16s_14237 | 0.187924979 | -0.616314324 | 3.550834348 | 0.669320249 | NA          | NA |
| ASV_16s_14238 | 0.187924979 | -0.616314324 | 3.550834348 | 0.669320249 | NA          | NA |
| ASV_16s_14239 | 0.232805777 | -0.661058211 | 3.550582251 | 0.741512372 | 0.997996048 | NA |
| ASV_16s_14240 | 0.121642183 | 0.220112646  | 3.550814537 | 0.542194881 | NA          | NA |
| ASV_16s_14241 | 0.086871237 | 0.595651987  | 3.550865541 | 0.349155498 | NA          | NA |
| ASV_16s_14242 | 0.197987607 | -0.078168007 | 3.550536658 | 1.2723553   | 0.989164421 | NA |
| ASV_16s_14243 | 0.259980997 | -0.726942055 | 3.550376249 | 0.835313767 | 0.99706664  | NA |
| ASV_16s_14244 | 0.264939615 | -0.736162934 | 3.550347519 | 0.854753444 | 0.9968442   | NA |
| ASV_16s_14245 | 0.194825219 | 0.10862884   | 3.550560958 | 0.932161348 | 0.995849917 | NA |
| ASV_16s_14246 | 0.250044117 | -0.724832619 | 3.550433523 | 0.844866483 | 0.996958661 | NA |
| ASV_16s_14247 | 0.23942262  | -0.707588606 | 3.550386548 | 0.891658962 | 0.996392194 | NA |
| ASV_16s_14248 | 0.249003986 | -0.716321908 | 3.550299101 | 0.932918565 | 0.995839307 | NA |
| ASV_16s_14249 | 0.205449287 | 0.003520659  | 3.550781177 | 0.706909588 | NA          | NA |
| ASV_16s_14250 | 0.226007082 | 0.234137425  | 3.550324171 | 1.247177886 | 0.989799763 | NA |
| ASV_16s_14251 | 0.219454242 | -0.483041946 | 3.550586388 | 0.985509519 | 0.995058913 | NA |
| ASV_16s_14252 | 0.199766509 | 0.241708458  | 3.550656187 | 1.140501451 | 0.992232949 | NA |
| ASV_16s_14253 | 0.196571589 | 0.362202433  | 3.55078905  | 0.996748675 | 0.994880814 | NA |
| ASV_16s_14254 | 0.255751455 | -0.244910025 | 3.550621899 | 0.791700506 | NA          | NA |
| ASV_16s_14255 | 0.230342268 | -0.651207453 | 3.550333481 | 0.988039386 | NA          | NA |
| ASV_16s_14256 | 0.239230314 | 1.304084961  | 3.550246711 | 0.380793306 | NA          | NA |
| ASV_16s_14257 | 0.250857554 | -0.674056591 | 3.550199611 | 1.057117179 | 0.993853794 | NA |
| ASV_16s_14258 | 0.199402819 | 0.684381104  | 3.551271074 | 0.904022741 | NA          | NA |
| ASV_16s_14259 | 0.246681182 | -0.654108869 | 3.550219208 | 1.063966347 | 0.993729633 | NA |
| ASV_16s_14260 | 0.215145931 | -0.061616481 | 3.550308859 | 0.674939313 | 0.998520968 | NA |
| ASV_16s_14261 | 0.263673938 | 1.701758309  | 3.550312711 | 0.377542101 | 0.999782924 | NA |
| ASV_16s_14262 | 0.249331822 | -0.644819548 | 3.550206345 | 1.087373936 | NA          | NA |
| ASV_16s_14263 | 0.243725693 | -0.014077641 | 3.550230596 | 0.791294636 | 0.997531783 | NA |
| ASV_16s_14264 | 0.248809764 | -0.643383378 | 3.550209746 | 1.086051202 | 0.993318466 | NA |
| ASV_16s_14265 | 0.262753574 | -0.217089248 | 3.550007407 | 1.11496539  | 0.992754884 | NA |
| ASV_16s_14266 | 0.205211113 | 0.010460634  | 3.551021008 | 0.925531762 | NA          | NA |
| ASV_16s_14267 | 0.249052371 | -0.624354249 | 3.550222187 | 1.101566407 | 0.993019641 | NA |
| ASV_16s_14268 | 0.270856752 | -0.922678917 | 3.550099632 | 0.773026335 | NA          | NA |
| ASV_16s_14269 | 0.230972672 | -0.568572898 | 3.551054354 | 0.850725346 | NA          | NA |
| ASV_16s_14270 | 0.238074551 | -0.581219986 | 3.550317216 | 1.085512386 | NA          | NA |
| ASV_16s_14271 | 0.249936005 | -0.599164487 | 3.550247517 | 1.120008052 | NA          | NA |
| ASV_16s_14272 | 0.247568898 | -0.57169814  | 3.55029715  | 1.122184649 | NA          | NA |
| ASV_16s_14273 | 0.249322752 | -0.582883238 | 3.550273257 | 1.125215033 | NA          | NA |
| ASV_16s_14274 | 0.217744534 | 0.375258152  | 3.550781145 | 1.118306176 | 0.9926879   | NA |
| ASV_16s_14275 | 0.241615801 | -0.587403267 | 3.550047459 | 0.47851543  | NA          | NA |
| ASV_16s_14276 | 0.218648312 | -0.576313203 | 3.550749035 | 0.865110632 | NA          | NA |
| ASV_16s_14277 | 0.248813175 | 0.183282093  | 3.549669812 | 1.13142034  | NA          | NA |
| ASV_16s_14278 | 0.246869737 | -0.507597718 | 3.550402816 | 1.129147439 | NA          | NA |

|               |             |              |             |             |             |    |
|---------------|-------------|--------------|-------------|-------------|-------------|----|
| ASV_16s_14279 | 0.251998015 | -0.508014442 | 3.550389878 | 1.143622993 | 0.992167574 | NA |
| ASV_16s_14280 | 0.214442248 | -0.409764175 | 3.551313069 | 0.778411871 | NA          | NA |
| ASV_16s_14281 | 0.22516362  | -0.285356871 | 3.550692353 | 1.020400881 | NA          | NA |
| ASV_16s_14282 | 0.237142151 | -0.360334552 | 3.54978733  | 0.673117425 | NA          | NA |
| ASV_16s_14283 | 0.277282044 | -0.610045029 | 3.55020899  | 1.111903895 | 0.992815927 | NA |
| ASV_16s_14284 | 0.266980184 | 0.210512038  | 3.550739139 | 1.074274825 | NA          | NA |
| ASV_16s_14285 | 0.226206097 | -0.497359362 | 3.550713029 | 0.794538589 | 0.99749929  | NA |
| ASV_16s_14286 | 0.261297535 | 0.104589679  | 3.550791501 | 1.188189337 | 0.991196298 | NA |
| ASV_16s_14287 | 0.162404452 | -0.118224081 | 3.550804776 | 0.50456323  | 0.999429601 | NA |
| ASV_16s_14288 | 0.186356972 | -0.50328734  | 3.551224052 | 0.622946965 | NA          | NA |
| ASV_16s_14289 | 0.208051358 | 1.225412583  | 3.550970976 | 0.652146404 | NA          | NA |
| ASV_16s_14290 | 0.270266544 | 0.079613151  | 3.549896599 | 0.87010357  | 0.996660979 | NA |
| ASV_16s_14291 | 0.207040163 | 1.596917238  | 3.550722664 | 0.389196496 | 0.999759635 | NA |
| ASV_16s_14292 | 0.203636389 | 0.37467409   | 3.55148951  | 0.677099402 | NA          | NA |
| ASV_16s_14293 | 0.246526686 | 0.386031568  | 3.551235264 | 0.741570299 | NA          | NA |
| ASV_16s_14294 | 0.261946289 | 0.837458318  | 3.551138146 | 0.725071716 | NA          | NA |
| ASV_16s_14295 | 0.2914732   | 0.353142315  | 3.55183532  | 0.447698559 | NA          | NA |
| ASV_16s_14296 | 0.183102998 | -0.154113587 | 3.550668054 | 1.096357157 | 0.993120895 | NA |
| ASV_16s_14297 | 0.268992304 | 0.392062511  | 3.551103294 | 0.770744336 | 0.99773118  | NA |
| ASV_16s_14298 | 0.21890503  | 0.124517884  | 3.550872463 | 1.273324461 | 0.989139489 | NA |
| ASV_16s_14299 | 0.254016745 | 0.38808072   | 3.551189205 | 0.75157379  | NA          | NA |
| ASV_16s_14300 | 0.254016745 | 0.38808072   | 3.551189205 | 0.75157379  | NA          | NA |
| ASV_16s_14301 | 0.225813042 | -0.239047459 | 3.550686197 | 0.512947586 | 0.999397678 | NA |
| ASV_16s_14302 | 0.249270789 | 0.494072026  | 3.549857474 | 0.777306467 | NA          | NA |
| ASV_16s_14303 | 0.157985723 | -0.240196201 | 3.550746103 | 0.648538994 | 0.998700654 | NA |
| ASV_16s_14304 | 0.219692386 | -1.09468072  | 3.550471245 | 0.383895147 | NA          | NA |
| ASV_16s_14305 | 0.210989634 | -1.06747543  | 3.550553064 | 0.375862337 | NA          | NA |
| ASV_16s_14306 | 0.121951093 | 1.088299807  | 3.551170824 | 0.414625714 | NA          | NA |
| ASV_16s_14307 | 0.209067134 | 1.249143307  | 3.550751196 | 0.593404652 | NA          | NA |
| ASV_16s_14308 | 0.209067134 | 1.249143307  | 3.550751196 | 0.593404652 | NA          | NA |
| ASV_16s_14309 | 0.213366264 | 0.695973212  | 3.550146573 | 0.939267017 | NA          | NA |
| ASV_16s_14310 | 0.269969868 | 0.119199169  | 3.549793695 | 1.597847376 | 0.978727598 | NA |
| ASV_16s_14311 | 0.217665394 | 0.400611239  | 3.551029379 | 0.632699273 | NA          | NA |
| ASV_16s_14312 | 0.225836616 | 0.766458329  | 3.550510293 | 1.105150148 | 0.992949438 | NA |
| ASV_16s_14313 | 0.109226309 | -0.43298364  | 3.551170267 | 0.415902881 | NA          | NA |
| ASV_16s_14314 | 0.109226309 | -0.43298364  | 3.551170267 | 0.415902881 | NA          | NA |
| ASV_16s_14315 | 0.109226309 | -0.43298364  | 3.551170267 | 0.415902881 | NA          | NA |
| ASV_16s_14316 | 0.109226309 | -0.43298364  | 3.551170267 | 0.415902881 | NA          | NA |
| ASV_16s_14317 | 0.132652847 | -0.481784636 | 3.550942121 | 0.474179953 | NA          | NA |
| ASV_16s_14318 | 0.132652847 | -0.481784636 | 3.550942121 | 0.474179953 | NA          | NA |
| ASV_16s_14319 | 0.12157348  | -0.460114181 | 3.551055164 | 0.447574491 | NA          | NA |
| ASV_16s_14320 | 0.12157348  | -0.460114181 | 3.551055164 | 0.447574491 | NA          | NA |
| ASV_16s_14321 | 0.185605758 | -0.07864219  | 3.550808914 | 0.900436747 | NA          | NA |
| ASV_16s_14322 | 0.185605758 | -0.07864219  | 3.550808914 | 0.900436747 | NA          | NA |
| ASV_16s_14323 | 0.130161108 | 0.220100718  | 3.550799007 | 0.572305892 | 0.999136307 | NA |
| ASV_16s_14324 | 0.135229455 | 0.220094384  | 3.550790692 | 0.589587241 | 0.999047872 | NA |
| ASV_16s_14325 | 0.138177069 | 0.220091082  | 3.550786136 | 0.599453053 | NA          | NA |
| ASV_16s_14326 | 0.235587762 | 0.310938947  | 3.550865826 | 0.99936805  | 0.994838724 | NA |
| ASV_16s_14327 | 0.191551977 | -0.068380723 | 3.550718287 | 1.092687148 | NA          | NA |
| ASV_16s_14328 | 0.243267196 | 0.104490896  | 3.550454207 | 0.779334704 | NA          | NA |
| ASV_16s_14329 | 0.195020606 | -0.068438101 | 3.550596307 | 1.179065429 | NA          | NA |
| ASV_16s_14330 | 0.187599818 | 1.339672153  | 3.55109518  | 0.51882262  | NA          | NA |
| ASV_16s_14331 | 0.196011642 | -0.068304485 | 3.550547152 | 1.193504673 | NA          | NA |
| ASV_16s_14332 | 0.249314775 | 0.36145846   | 3.551830743 | 0.620544854 | NA          | NA |
| ASV_16s_14333 | 0.314093723 | 0.808603228  | 3.550679694 | 1.312025218 | NA          | NA |
| ASV_16s_14334 | 0.211553196 | -0.068288621 | 3.550418803 | 1.251950885 | 0.98968114  | NA |
| ASV_16s_14335 | 0.208862095 | -0.068235901 | 3.550434242 | 1.242442764 | NA          | NA |
| ASV_16s_14336 | 0.175597871 | 0.002188167  | 3.551003239 | 0.871590085 | NA          | NA |
| ASV_16s_14337 | 0.200966826 | -0.064453788 | 3.550601597 | 1.154525868 | NA          | NA |
| ASV_16s_14338 | 0.245421718 | 1.062915333  | 3.550858566 | 1.131792427 | NA          | NA |
| ASV_16s_14339 | 0.261915411 | 0.732926695  | 3.551378628 | 0.791880677 | NA          | NA |
| ASV_16s_14340 | 0.288640996 | 0.766741143  | 3.550622948 | 1.028670562 | NA          | NA |
| ASV_16s_14341 | 0.319941438 | -0.239368849 | 3.549758408 | 1.296815893 | NA          | NA |
| ASV_16s_14342 | 0.213846167 | 0.665557468  | 3.550707283 | 0.852936033 | NA          | NA |
| ASV_16s_14343 | 0.112828826 | 0.283344303  | 3.551712805 | 0.490400994 | NA          | NA |
| ASV_16s_14344 | 0.130297413 | 0.281929806  | 3.551675175 | 0.537419332 | NA          | NA |
| ASV_16s_14345 | 0.307800422 | -0.602470167 | 3.550666374 | 0.821767384 | NA          | NA |

|               |             |              |             |             |             |    |
|---------------|-------------|--------------|-------------|-------------|-------------|----|
| ASV_16s_14346 | 0.28960457  | 0.350885148  | 3.551278306 | 0.577185014 | 0.999111926 | NA |
| ASV_16s_14347 | 0.246526686 | -0.547191532 | 3.550031677 | 0.669527134 | NA          | NA |
| ASV_16s_14348 | 0.241876744 | 1.157395993  | 3.550293966 | 1.027815092 | NA          | NA |
| ASV_16s_14349 | 0.235823906 | 1.057175673  | 3.550469923 | 1.012401937 | NA          | NA |
| ASV_16s_14350 | 0.22800856  | 0.630186793  | 3.550876805 | 0.954535299 | 0.995528986 | NA |
| ASV_16s_14351 | 0.166529949 | -0.09859756  | 3.550806645 | 0.913715588 | NA          | NA |
| ASV_16s_14352 | 0.223350487 | -0.075274972 | 3.550690236 | 1.115255078 | 0.992749091 | NA |
| ASV_16s_14353 | 0.225191251 | 0.02724655   | 3.550853635 | 1.031509496 | 0.994304104 | NA |
| ASV_16s_14354 | 0.322133586 | 0.481280185  | 3.550831434 | 1.819435321 | NA          | NA |
| ASV_16s_14355 | 0.449355641 | 0.774923785  | 3.550808598 | 1.647106631 | NA          | NA |
| ASV_16s_14356 | 0.258805144 | 0.346443131  | 3.550166745 | 1.382723556 | NA          | NA |
| ASV_16s_14357 | 0.205509547 | -0.028799223 | 3.550914259 | 1.009546646 | NA          | NA |
| ASV_16s_14358 | 0.219846072 | 0.13208887   | 3.550891052 | 1.403366381 | NA          | NA |
| ASV_16s_14359 | 0.22091371  | -0.445559369 | 3.550664732 | 0.799690499 | NA          | NA |
| ASV_16s_14360 | 0.255570055 | 0.37329432   | 3.550489586 | 1.249687028 | NA          | NA |
| ASV_16s_14361 | 0.257918098 | 0.335617615  | 3.550188461 | 1.389519138 | NA          | NA |
| ASV_16s_14362 | 0.232255427 | 0.342112237  | 3.550313606 | 1.278249584 | NA          | NA |
| ASV_16s_14363 | 0.2499747   | 0.360607041  | 3.550435908 | 1.254324249 | NA          | NA |
| ASV_16s_14364 | 0.168422002 | -0.073434793 | 3.550870976 | 0.877571322 | NA          | NA |
| ASV_16s_14365 | 0.168422002 | -0.073434793 | 3.550870976 | 0.877571322 | NA          | NA |
| ASV_16s_14366 | 0.240323627 | 0.290400439  | 3.550466695 | 1.442591563 | 0.984230864 | NA |
| ASV_16s_14367 | 0.234429359 | 0.360342418  | 3.551027017 | 1.058656859 | NA          | NA |
| ASV_16s_14368 | 0.256103047 | 0.665034519  | 3.550028685 | 1.182852709 | NA          | NA |
| ASV_16s_14369 | 0.232213298 | 0.329408813  | 3.550973007 | 0.844635946 | NA          | NA |
| ASV_16s_14370 | 0.2083996   | 0.360325971  | 3.55108076  | 0.999804015 | NA          | NA |
| ASV_16s_14371 | 0.2083996   | 0.360325971  | 3.55108076  | 0.999804015 | NA          | NA |
| ASV_16s_14372 | 0.239075214 | 0.315939598  | 3.550887427 | 1.029556405 | 0.994337556 | NA |
| ASV_16s_14373 | 0.225982315 | 0.315939619  | 3.550904732 | 1.001308694 | 0.994807398 | NA |
| ASV_16s_14374 | 0.24762089  | 0.315939585  | 3.550877132 | 1.047135446 | 0.994031921 | NA |
| ASV_16s_14375 | 0.29001407  | 0.315939537  | 3.550834922 | 1.126933661 | 0.992513112 | NA |
| ASV_16s_14376 | 0.217665394 | 0.315939713  | 3.5509168   | 0.982564991 | NA          | NA |
| ASV_16s_14377 | 0.217665394 | 0.315939713  | 3.5509168   | 0.982564991 | NA          | NA |
| ASV_16s_14378 | 0.207290816 | 0.687881876  | 3.550874595 | 0.869786671 | NA          | NA |
| ASV_16s_14379 | 0.304876463 | 1.165915187  | 3.550746892 | 0.862394979 | NA          | NA |
| ASV_16s_14380 | 0.310955509 | 1.085407337  | 3.550836265 | 0.919893136 | NA          | NA |
| ASV_16s_14381 | 0.303871301 | 0.734386026  | 3.550929762 | 1.126148699 | 0.992529122 | NA |
| ASV_16s_14382 | 0.28794457  | 0.734319884  | 3.550949243 | 1.098986863 | NA          | NA |
| ASV_16s_14383 | 0.142634974 | 0.731462533  | 3.551321946 | 0.758602905 | NA          | NA |
| ASV_16s_14384 | 0.142634974 | 0.731462533  | 3.551321946 | 0.758602905 | NA          | NA |
| ASV_16s_14385 | 0.26769516  | 0.693232161  | 3.55082929  | 1.021622217 | NA          | NA |
| ASV_16s_14386 | 0.24050507  | 0.693124285  | 3.55086046  | 0.967945892 | 0.995329173 | NA |
| ASV_16s_14387 | 0.272153506 | 0.693246338  | 3.550824771 | 1.02992341  | 0.994331279 | NA |
| ASV_16s_14388 | 0.258014659 | 0.693195465  | 3.55083964  | 1.00310908  | 0.994778227 | NA |
| ASV_16s_14389 | 0.259005403 | 0.693199207  | 3.550838546 | 1.005031194 | 0.994746968 | NA |
| ASV_16s_14390 | 0.232698125 | 0.693089132  | 3.550870747 | 0.951518502 | 0.995573161 | NA |
| ASV_16s_14391 | 0.217665394 | 0.693016029  | 3.550892616 | 0.91844534  | NA          | NA |
| ASV_16s_14392 | 0.217665394 | 0.693016029  | 3.550892616 | 0.91844534  | NA          | NA |
| ASV_16s_14393 | 0.217665394 | 0.693016029  | 3.550892616 | 0.91844534  | NA          | NA |
| ASV_16s_14394 | 0.25297599  | 0.693175935  | 3.550845351 | 0.993160801 | 0.994938109 | NA |
| ASV_16s_14395 | 0.183582971 | 0.287585454  | 3.551632138 | 0.642084245 | NA          | NA |
| ASV_16s_14396 | 0.183582971 | 0.287585454  | 3.551632138 | 0.642084245 | NA          | NA |
| ASV_16s_14397 | 0.183582971 | 0.287585454  | 3.551632138 | 0.642084245 | NA          | NA |
| ASV_16s_14398 | 0.183582971 | 0.287585454  | 3.551632138 | 0.642084245 | NA          | NA |
| ASV_16s_14399 | 0.183582971 | 0.287585454  | 3.551632138 | 0.642084245 | NA          | NA |
| ASV_16s_14400 | 0.183582971 | 0.287585454  | 3.551632138 | 0.642084245 | NA          | NA |
| ASV_16s_14401 | 0.183657124 | -0.042563959 | 3.55098461  | 1.022092337 | NA          | NA |
| ASV_16s_14402 | 0.183668532 | -0.078001543 | 3.550932273 | 1.053921441 | 0.993911186 | NA |
| ASV_16s_14403 | 0.183668532 | -0.078001543 | 3.550932273 | 1.053921441 | 0.993911186 | NA |
| ASV_16s_14404 | 0.187725672 | -0.107175744 | 3.550862375 | 1.084518967 | 0.993347529 | NA |
| ASV_16s_14405 | 0.187725672 | -0.107175744 | 3.550862375 | 1.084518967 | 0.993347529 | NA |
| ASV_16s_14406 | 0.187984591 | -0.123946405 | 3.550839845 | 1.096924747 | 0.993109908 | NA |
| ASV_16s_14407 | 0.186471007 | -0.136000609 | 3.550839913 | 1.101271146 | 0.993025405 | NA |
| ASV_16s_14408 | 0.201431272 | -0.168925617 | 3.550672571 | 1.160486588 | 0.991808411 | NA |
| ASV_16s_14409 | 0.188502429 | -0.156621408 | 3.55080068  | 1.118043197 | 0.992693187 | NA |
| ASV_16s_14410 | 0.188761348 | -0.172648225 | 3.55078397  | 1.12670931  | 0.99251769  | NA |
| ASV_16s_14411 | 0.18370846  | -0.192336785 | 3.550812822 | 1.12013796  | 0.992651007 | NA |
| ASV_16s_14412 | 0.191666057 | -0.224161602 | 3.550723928 | 1.146854288 | 0.992099536 | NA |

|               |             |              |             |             |             |    |
|---------------|-------------|--------------|-------------|-------------|-------------|----|
| ASV_16s_14413 | 0.189538104 | -0.220008827 | 3.550744221 | 1.143828826 | 0.992163251 | NA |
| ASV_16s_14414 | 0.20825828  | -0.264945938 | 3.55056271  | 1.197680867 | 0.990980197 | NA |
| ASV_16s_14415 | 0.188277734 | -0.232780754 | 3.550748685 | 1.135885619 | 0.99232899  | NA |
| ASV_16s_14416 | 0.183725572 | -0.239309249 | 3.550785429 | 1.111617486 | 0.992821621 | NA |
| ASV_16s_14417 | 0.190314861 | -0.267038677 | 3.550718644 | 1.127762785 | 0.992496177 | NA |
| ASV_16s_14418 | 0.183731277 | -0.254945533 | 3.55077903  | 1.103838179 | 0.99297519  | NA |
| ASV_16s_14419 | 0.186781262 | -0.29240843  | 3.550742375 | 1.094529267 | 0.993156203 | NA |
| ASV_16s_14420 | 0.065628702 | -0.269822201 | 3.551720287 | 0.348159436 | NA          | NA |
| ASV_16s_14421 | 0.262387065 | -0.67653248  | 3.55042356  | 0.781468163 | 0.997628509 | NA |
| ASV_16s_14422 | 0.23794661  | -0.664226012 | 3.55055348  | 0.748842413 | 0.997931666 | NA |
| ASV_16s_14423 | 0.237482965 | -0.663943963 | 3.55055602  | 0.748190089 | 0.99793745  | NA |
| ASV_16s_14424 | 0.24334041  | -0.667466602 | 3.550524568 | 0.756341739 | 0.997864396 | NA |
| ASV_16s_14425 | 0.22960099  | -0.658823605 | 3.550599566 | 0.736908785 | NA          | NA |
| ASV_16s_14426 | 0.235274925 | -0.66258689  | 3.550568298 | 0.745046353 | NA          | NA |
| ASV_16s_14427 | 0.195234319 | -0.626983405 | 3.550796331 | 0.682428325 | NA          | NA |
| ASV_16s_14428 | 0.190170023 | -0.619617905 | 3.550822477 | 0.67336619  | 0.998532114 | NA |
| ASV_16s_14429 | 0.189916808 | -0.61924472  | 3.550823814 | 0.672907448 | 0.998535353 | NA |
| ASV_16s_14430 | 0.183839654 | -0.61000597  | 3.550856522 | 0.661692499 | NA          | NA |
| ASV_16s_14431 | 0.183839654 | -0.61000597  | 3.550856522 | 0.661692499 | NA          | NA |
| ASV_16s_14432 | 0.183839654 | -0.61000597  | 3.550856522 | 0.661692499 | NA          | NA |
| ASV_16s_14433 | 0.183839654 | -0.61000597  | 3.550856522 | 0.661692499 | NA          | NA |
| ASV_16s_14434 | 0.053719097 | -0.168578712 | 3.550999889 | 0.259838333 | 0.999938561 | NA |
| ASV_16s_14435 | 0.061759636 | 0.220286293  | 3.551043627 | 0.28125761  | NA          | NA |
| ASV_16s_14436 | 0.061759636 | 0.220286293  | 3.551043627 | 0.28125761  | NA          | NA |
| ASV_16s_14438 | 0.130083161 | 0.595917845  | 3.550761059 | 0.509689814 | NA          | NA |
| ASV_16s_14439 | 0.187442556 | 0.082672734  | 3.551006677 | 0.96304032  | NA          | NA |
| ASV_16s_14440 | 0.205724816 | -0.010291097 | 3.550694171 | 1.12892349  | 0.992472429 | NA |
| ASV_16s_14441 | 0.186754302 | 0.038294045  | 3.550755982 | 1.030196922 | 0.994326599 | NA |
| ASV_16s_14442 | 0.230918898 | -0.428260082 | 3.550703369 | 1.090699272 | 0.993229812 | NA |
| ASV_16s_14443 | 0.190194738 | 0.246620798  | 3.550862506 | 1.038622733 | 0.994181206 | NA |
| ASV_16s_14444 | 0.255050268 | -0.655817989 | 3.550684985 | 0.719320575 | 0.998182842 | NA |
| ASV_16s_14445 | 0.208169397 | 0.312934645  | 3.550595291 | 0.989280944 | 0.994999601 | NA |
| ASV_16s_14446 | 0.188248703 | 0.143526201  | 3.550696116 | 1.0630597   | 0.99374616  | NA |
| ASV_16s_14447 | 0.247632292 | -0.714407371 | 3.550307484 | 0.929571376 | 0.995886075 | NA |
| ASV_16s_14448 | 0.189206693 | 0.680458066  | 3.551026544 | 0.81334266  | 0.997305391 | NA |
| ASV_16s_14449 | 0.198848209 | 0.352698219  | 3.550768477 | 1.061063228 | 0.993782453 | NA |
| ASV_16s_14450 | 0.242636317 | -0.694485865 | 3.550294157 | 0.965549201 | 0.995365297 | NA |
| ASV_16s_14451 | 0.280787464 | 1.76955922   | 3.550019122 | 0.3482556   | 0.999834505 | NA |
| ASV_16s_14452 | 0.242724047 | -0.657253262 | 3.550245056 | 1.040058424 | NA          | NA |
| ASV_16s_14453 | 0.224967463 | -0.627548693 | 3.550359353 | 0.992294159 | NA          | NA |
| ASV_16s_14454 | 0.246187485 | 0.274121103  | 3.549824551 | 0.739441208 | 0.998013996 | NA |
| ASV_16s_14455 | 0.24351469  | -0.635121832 | 3.550241298 | 1.067404528 | 0.99366671  | NA |
| ASV_16s_14456 | 0.207995177 | 0.773907616  | 3.550658411 | 0.862805867 | 0.996748927 | NA |
| ASV_16s_14457 | 0.252887448 | -0.645259991 | 3.550188629 | 1.097152195 | 0.993105502 | NA |
| ASV_16s_14458 | 0.246035748 | -0.628918928 | 3.550232275 | 1.082613157 | NA          | NA |
| ASV_16s_14459 | 0.231529675 | -0.415232867 | 3.550500674 | 1.022817207 | NA          | NA |
| ASV_16s_14460 | 0.22928397  | -0.539369751 | 3.550438407 | 1.087917073 | 0.993282966 | NA |
| ASV_16s_14461 | 0.235474007 | -0.052291485 | 3.549935618 | 0.994712551 | NA          | NA |
| ASV_16s_14462 | 0.242441961 | 0.183066754  | 3.549681435 | 1.105392213 | NA          | NA |
| ASV_16s_14463 | 0.229743979 | -0.115315633 | 3.550783116 | 1.069518105 | 0.993627831 | NA |
| ASV_16s_14464 | 0.202885743 | 0.057304576  | 3.550707914 | 0.917816145 | NA          | NA |
| ASV_16s_14465 | 0.254026599 | -0.429254123 | 3.550498308 | 1.136484969 | NA          | NA |
| ASV_16s_14466 | 0.23015846  | -0.341555321 | 3.55064356  | 1.052275549 | 0.993940611 | NA |
| ASV_16s_14467 | 0.25011097  | -0.073747286 | 3.55050997  | 0.712625271 | 0.998236838 | NA |
| ASV_16s_14468 | 0.199493247 | -0.547454388 | 3.5508921   | 0.670770308 | NA          | NA |
| ASV_16s_14469 | 0.25920555  | 0.309465903  | 3.550773941 | 1.101498004 | NA          | NA |
| ASV_16s_14470 | 0.238340063 | -0.247760095 | 3.551224    | 0.772153084 | NA          | NA |
| ASV_16s_14471 | 0.218964017 | 0.202134584  | 3.549866523 | 0.907541548 | 0.996185404 | NA |
| ASV_16s_14472 | 0.228330361 | 0.14561849   | 3.550626289 | 0.749485823 | NA          | NA |
| ASV_16s_14473 | 0.29504191  | -0.970654231 | 3.549885927 | 0.546020074 | NA          | NA |
| ASV_16s_14474 | 0.253826194 | 0.266084831  | 3.550756996 | 1.024155812 | 0.994429401 | NA |
| ASV_16s_14475 | 0.189154951 | 0.354979463  | 3.551556755 | 0.436095074 | NA          | NA |
| ASV_16s_14476 | 0.237771839 | 0.012193553  | 3.550593901 | 1.012536264 | NA          | NA |
| ASV_16s_14477 | 0.215155333 | -0.418020668 | 3.550556687 | 0.994012506 | 0.994924546 | NA |
| ASV_16s_14478 | 0.259392011 | 0.714428059  | 3.550777732 | 1.037008721 | NA          | NA |
| ASV_16s_14479 | 0.217974347 | 0.054788766  | 3.550871727 | 0.977485657 | NA          | NA |
| ASV_16s_14480 | 0.243554986 | 1.711823051  | 3.550448923 | 0.417718655 | 0.999695494 | NA |

|               |             |              |             |             |             |    |
|---------------|-------------|--------------|-------------|-------------|-------------|----|
| ASV_16s_14481 | 0.229916913 | 1.523973212  | 3.550632776 | 0.55143173  | NA          | NA |
| ASV_16s_14482 | 0.261444089 | 0.355412525  | 3.55175082  | 0.433286733 | NA          | NA |
| ASV_16s_14483 | 0.197753459 | 1.138219899  | 3.55104899  | 0.675926138 | 0.998513948 | NA |
| ASV_16s_14484 | 0.260050435 | 0.360887834  | 3.551675688 | 0.445269638 | NA          | NA |
| ASV_16s_14485 | 0.154375472 | 0.351322671  | 3.551783209 | 0.584558449 | NA          | NA |
| ASV_16s_14486 | 0.154375472 | 0.351322671  | 3.551783209 | 0.584558449 | NA          | NA |
| ASV_16s_14487 | 0.220357191 | 0.352502556  | 3.551914763 | 0.394434522 | 0.999748629 | NA |
| ASV_16s_14488 | 0.277044313 | -0.405430393 | 3.550044705 | 1.038148789 | NA          | NA |
| ASV_16s_14489 | 0.356031982 | 0.40323014   | 3.550664653 | 0.863004813 | NA          | NA |
| ASV_16s_14490 | 0.284749228 | 0.360453966  | 3.551884217 | 0.47015553  | NA          | NA |
| ASV_16s_14491 | 0.229755386 | -0.883351876 | 3.550478425 | 0.628501507 | NA          | NA |
| ASV_16s_14492 | 0.154176516 | -0.505527308 | 3.551074369 | 0.588373699 | NA          | NA |
| ASV_16s_14493 | 0.119299982 | 1.081035378  | 3.551187488 | 0.407912346 | NA          | NA |
| ASV_16s_14494 | 0.256685161 | 0.132019323  | 3.54991287  | 1.465601388 | 0.983476702 | NA |
| ASV_16s_14495 | 0.225175693 | 0.336465203  | 3.55113245  | 0.575566775 | NA          | NA |
| ASV_16s_14496 | 0.175774122 | 0.381009535  | 3.551300655 | 0.562396262 | NA          | NA |
| ASV_16s_14497 | 0.124068389 | 0.358256745  | 3.55158639  | 0.450569039 | 0.999608106 | NA |
| ASV_16s_14498 | 0.155156424 | -0.513342577 | 3.55072028  | 0.521376828 | 0.999364382 | NA |
| ASV_16s_14499 | 0.262116612 | -0.547513316 | 3.549952552 | 0.688929934 | NA          | NA |
| ASV_16s_14500 | 0.212933538 | -0.688507144 | 3.550471123 | 0.56109097  | NA          | NA |
| ASV_16s_14501 | 0.094280663 | 1.003897185  | 3.551378235 | 0.340634314 | NA          | NA |
| ASV_16s_14502 | 0.094280663 | 1.003897185  | 3.551378235 | 0.340634314 | NA          | NA |
| ASV_16s_14503 | 0.094280663 | 1.003897185  | 3.551378235 | 0.340634314 | NA          | NA |
| ASV_16s_14504 | 0.18157085  | -0.078620463 | 3.550815443 | 0.889684364 | NA          | NA |
| ASV_16s_14505 | 0.18157085  | -0.078620463 | 3.550815443 | 0.889684364 | NA          | NA |
| ASV_16s_14506 | 0.13517322  | 0.220094627  | 3.550790789 | 0.589359592 | NA          | NA |
| ASV_16s_14507 | 0.13517322  | 0.220094627  | 3.550790789 | 0.589359592 | NA          | NA |
| ASV_16s_14508 | 0.13517322  | 0.220094627  | 3.550790789 | 0.589359592 | NA          | NA |
| ASV_16s_14509 | 0.137674739 | 0.351734708  | 3.550760077 | 0.931974911 | 0.995852527 | NA |
| ASV_16s_14510 | 0.230331178 | 0.310939371  | 3.550872155 | 0.987997776 | 0.995019832 | NA |
| ASV_16s_14511 | 0.210572188 | 0.491247627  | 3.550681582 | 1.04113986  | NA          | NA |
| ASV_16s_14512 | 0.212933538 | 0.253580101  | 3.550492031 | 1.086924596 | NA          | NA |
| ASV_16s_14513 | 0.187021551 | -0.06760152  | 3.550744161 | 1.062372438 | NA          | NA |
| ASV_16s_14514 | 0.335259966 | 1.236244998  | 3.550464276 | 1.118740003 | 0.992679173 | NA |
| ASV_16s_14515 | 0.192967771 | -0.068078508 | 3.550543935 | 1.186121549 | NA          | NA |
| ASV_16s_14516 | 0.186420135 | 0.510712169  | 3.550994925 | 0.572414113 | 0.999135771 | NA |
| ASV_16s_14517 | 0.245427685 | 0.455184381  | 3.550577846 | 0.825154826 | 0.997178685 | NA |
| ASV_16s_14518 | 0.183584431 | 0.385808906  | 3.551481581 | 0.718392154 | NA          | NA |
| ASV_16s_14519 | 0.181602206 | -0.385220134 | 3.551498636 | 0.69836285  | NA          | NA |
| ASV_16s_14520 | 0.233195964 | 1.321101058  | 3.550734028 | 0.59998419  | NA          | NA |
| ASV_16s_14521 | 0.19125494  | 0.873985213  | 3.551347677 | 0.493854134 | NA          | NA |
| ASV_16s_14522 | 0.197427436 | -0.05701629  | 3.55068643  | 1.11564847  | NA          | NA |
| ASV_16s_14523 | 0.20415548  | -0.063255859 | 3.550598165 | 1.144632529 | NA          | NA |
| ASV_16s_14524 | 0.414730591 | -0.565438882 | 3.549659982 | 0.906378414 | NA          | NA |
| ASV_16s_14525 | 0.2894568   | 0.352848749  | 3.551413744 | 0.559251331 | NA          | NA |
| ASV_16s_14526 | 0.269919591 | 0.323708143  | 3.550962606 | 0.764365075 | 0.997790841 | NA |
| ASV_16s_14527 | 0.24116741  | -0.547070878 | 3.550061364 | 0.662547153 | NA          | NA |
| ASV_16s_14528 | 0.223740686 | -0.800230503 | 3.550593584 | 0.620288181 | NA          | NA |
| ASV_16s_14529 | 0.152378406 | -0.078428636 | 3.550872819 | 0.805739711 | NA          | NA |
| ASV_16s_14530 | 0.187823575 | -0.116394463 | 3.55036377  | 1.112417808 | NA          | NA |
| ASV_16s_14531 | 0.394623267 | 0.337262802  | 3.549749915 | 1.848902568 | NA          | NA |
| ASV_16s_14532 | 0.201041948 | -0.028773025 | 3.550923    | 0.998658345 | NA          | NA |
| ASV_16s_14533 | 0.201041948 | -0.028773025 | 3.550923    | 0.998658345 | NA          | NA |
| ASV_16s_14534 | 0.229716011 | -0.073769673 | 3.550775984 | 1.02981157  | NA          | NA |
| ASV_16s_14535 | 0.241126791 | -0.024447955 | 3.550763491 | 1.294088365 | NA          | NA |
| ASV_16s_14536 | 0.27253446  | 0.252370508  | 3.550205036 | 1.603312519 | 0.978515981 | NA |
| ASV_16s_14537 | 0.167775296 | -0.073430074 | 3.55087236  | 0.875676116 | NA          | NA |
| ASV_16s_14538 | 0.167775296 | -0.073430074 | 3.55087236  | 0.875676116 | NA          | NA |
| ASV_16s_14539 | 0.209604262 | 0.548120606  | 3.550713779 | 1.265076418 | 0.989350543 | NA |
| ASV_16s_14540 | 0.221923621 | 0.33913086   | 3.550349549 | 1.244483851 | NA          | NA |
| ASV_16s_14541 | 0.229333068 | 0.36033949   | 3.551036602 | 1.047578884 | NA          | NA |
| ASV_16s_14542 | 0.229333068 | 0.36033949   | 3.551036602 | 1.047578884 | NA          | NA |
| ASV_16s_14543 | 0.222230915 | 0.346430069  | 3.551109183 | 0.754982106 | 0.997876698 | NA |
| ASV_16s_14544 | 0.263389758 | 0.349272184  | 3.550937501 | 0.818590498 | 0.99724957  | NA |
| ASV_16s_14545 | 0.218770299 | 0.328877342  | 3.550977827 | 0.845910735 | 0.996946702 | NA |
| ASV_16s_14546 | 0.203869174 | 0.360322686  | 3.551091523 | 0.988853479 | NA          | NA |
| ASV_16s_14547 | 0.203869174 | 0.360322686  | 3.551091523 | 0.988853479 | NA          | NA |

|               |             |              |             |             |             |    |
|---------------|-------------|--------------|-------------|-------------|-------------|----|
| ASV_16s_14548 | 0.203869174 | 0.360322686  | 3.551091523 | 0.988853479 | NA          | NA |
| ASV_16s_14549 | 0.203869174 | 0.360322686  | 3.551091523 | 0.988853479 | NA          | NA |
| ASV_16s_14550 | 0.203869174 | 0.360322686  | 3.551091523 | 0.988853479 | NA          | NA |
| ASV_16s_14551 | 0.203869174 | 0.360322686  | 3.551091523 | 0.988853479 | NA          | NA |
| ASV_16s_14552 | 0.207092059 | 0.765316835  | 3.55085382  | 1.172755661 | NA          | NA |
| ASV_16s_14553 | 0.272306324 | 0.315939436  | 3.550850964 | 1.095064489 | 0.993145877 | NA |
| ASV_16s_14554 | 0.229448394 | 0.315939476  | 3.550899971 | 1.008881159 | 0.994683996 | NA |
| ASV_16s_14555 | 0.228332341 | 0.315939631  | 3.55090149  | 1.00645361  | NA          | NA |
| ASV_16s_14556 | 0.218750863 | 0.315939648  | 3.550915186 | 0.984997872 | 0.995066925 | NA |
| ASV_16s_14557 | 0.245933449 | 0.315939458  | 3.550879136 | 1.043382245 | 0.994098037 | NA |
| ASV_16s_14558 | 0.212933538 | 0.31593966   | 3.550924098 | 0.971550129 | NA          | NA |
| ASV_16s_14559 | 0.212933538 | 0.31593966   | 3.550924098 | 0.971550129 | NA          | NA |
| ASV_16s_14560 | 0.212933538 | 0.31593966   | 3.550924098 | 0.971550129 | NA          | NA |
| ASV_16s_14561 | 0.212933538 | 0.31593966   | 3.550924098 | 0.971550129 | NA          | NA |
| ASV_16s_14562 | 0.286704597 | 0.596215045  | 3.550645868 | 0.887997177 | NA          | NA |
| ASV_16s_14563 | 0.202784494 | 0.687859786  | 3.550881687 | 0.858981478 | NA          | NA |
| ASV_16s_14564 | 0.202784494 | 0.687859786  | 3.550881687 | 0.858981478 | NA          | NA |
| ASV_16s_14565 | 0.349998768 | 1.183081929  | 3.550396655 | 0.895475261 | NA          | NA |
| ASV_16s_14566 | 0.289548912 | 1.021031056  | 3.550716428 | 0.866959573 | NA          | NA |
| ASV_16s_14567 | 0.139534213 | 0.730922449  | 3.551337244 | 0.748674693 | NA          | NA |
| ASV_16s_14568 | 0.2618757   | 0.693211314  | 3.550835429 | 1.010534896 | NA          | NA |
| ASV_16s_14569 | 0.274188095 | 0.693253439  | 3.550822771 | 1.033597931 | 0.994268195 | NA |
| ASV_16s_14570 | 0.246125282 | 0.693148483  | 3.550853467 | 0.979423971 | 0.995153662 | NA |
| ASV_16s_14571 | 0.260112658 | 0.693203572  | 3.55083735  | 1.007093214 | 0.9947133   | NA |
| ASV_16s_14572 | 0.269306277 | 0.693236747  | 3.55082765  | 1.024587613 | NA          | NA |
| ASV_16s_14573 | 0.269306277 | 0.693236747  | 3.55082765  | 1.024587613 | NA          | NA |
| ASV_16s_14574 | 0.269306277 | 0.693236747  | 3.55082765  | 1.024587613 | NA          | NA |
| ASV_16s_14575 | 0.255526274 | 0.693186183  | 3.550842437 | 0.998200357 | 0.994857515 | NA |
| ASV_16s_14576 | 0.212933538 | 0.692990494  | 3.55090015  | 0.90757135  | NA          | NA |
| ASV_16s_14577 | 0.212933538 | 0.692990494  | 3.55090015  | 0.90757135  | NA          | NA |
| ASV_16s_14578 | 0.077012652 | 0.678839466  | 3.551955164 | 0.260843459 | 0.999937749 | NA |
| ASV_16s_14579 | 0.190022683 | 1.212096542  | 3.551063501 | 0.494115839 | 0.999467743 | NA |
| ASV_16s_14580 | 0.179503349 | 0.288631881  | 3.551652683 | 0.634454198 | NA          | NA |
| ASV_16s_14581 | 0.179503349 | 0.288631881  | 3.551652683 | 0.634454198 | NA          | NA |
| ASV_16s_14582 | 0.183128213 | -0.076208128 | 3.550939371 | 1.042009884 | 0.994122095 | NA |
| ASV_16s_14583 | 0.183387132 | -0.094180654 | 3.550913328 | 1.057123889 | 0.993853673 | NA |
| ASV_16s_14584 | 0.183387132 | -0.094180654 | 3.550913328 | 1.057123889 | 0.993853673 | NA |
| ASV_16s_14585 | 0.183646051 | -0.111742953 | 3.550889676 | 1.070570243 | 0.99360842  | NA |
| ASV_16s_14586 | 0.184163888 | -0.145856495 | 3.550848757 | 1.093259957 | 0.993180654 | NA |
| ASV_16s_14587 | 0.184422807 | -0.162505034 | 3.550831173 | 1.102681489 | 0.992997845 | NA |
| ASV_16s_14588 | 0.179617431 | -0.166234573 | 3.550867081 | 1.093280652 | 0.993180256 | NA |
| ASV_16s_14589 | 0.184681726 | -0.178939931 | 3.550815332 | 1.110830318 | 0.992837256 | NA |
| ASV_16s_14590 | 0.182160986 | -0.204409366 | 3.550817181 | 1.111808068 | 0.992817832 | NA |
| ASV_16s_14591 | 0.185717401 | -0.243255907 | 3.550766882 | 1.119059467 | 0.992672742 | NA |
| ASV_16s_14592 | 0.183449877 | -0.270063531 | 3.550776342 | 1.093531202 | 0.993175434 | NA |
| ASV_16s_14593 | 0.179651655 | -0.262411614 | 3.550809935 | 1.079674331 | 0.993438892 | NA |
| ASV_16s_14594 | 0.186494158 | -0.291895245 | 3.550745171 | 1.093453609 | 0.993176927 | NA |
| ASV_16s_14595 | 0.183708795 | -0.286611626 | 3.550768711 | 1.083873318 | 0.993359751 | NA |
| ASV_16s_14596 | 0.182949151 | -0.285145831 | 3.550775251 | 1.081234622 | 0.993409555 | NA |
| ASV_16s_14597 | 0.191976428 | -0.332738194 | 3.550693745 | 1.082623804 | 0.993383364 | NA |
| ASV_16s_14598 | 0.179674471 | -0.328540723 | 3.550794657 | 1.031255401 | NA          | NA |
| ASV_16s_14599 | 0.035559681 | -0.021875155 | 3.551645458 | 0.046747009 | 0.999999835 | NA |
| ASV_16s_14600 | 0.064170286 | -0.2626403   | 3.551731139 | 0.34260275  | NA          | NA |
| ASV_16s_14601 | 0.064170286 | -0.2626403   | 3.551731139 | 0.34260275  | NA          | NA |
| ASV_16s_14602 | 0.2671524   | -0.677642998 | 3.550396291 | 0.787320784 | 0.997571206 | NA |
| ASV_16s_14603 | 0.237017176 | -0.663649657 | 3.550558691 | 0.747492371 | 0.997943625 | NA |
| ASV_16s_14604 | 0.233308012 | -0.661368361 | 3.550579416 | 0.742224817 | 0.997989849 | NA |
| ASV_16s_14605 | 0.232844366 | -0.661080643 | 3.550582048 | 0.741561658 | 0.997995619 | NA |
| ASV_16s_14606 | 0.190895778 | -0.620661182 | 3.550818743 | 0.674638111 | NA          | NA |
| ASV_16s_14607 | 0.186591127 | -0.614250344 | 3.550841682 | 0.666782942 | 0.998578146 | NA |
| ASV_16s_14608 | 0.18355255  | -0.609532807 | 3.550858186 | 0.661110352 | 0.998617029 | NA |
| ASV_16s_14609 | 0.183299335 | -0.60913622  | 3.550859581 | 0.660633813 | 0.998620263 | NA |
| ASV_16s_14610 | 0.179754328 | -0.603527702 | 3.550879441 | 0.653910955 | NA          | NA |
| ASV_16s_14611 | 0.179754328 | -0.603527702 | 3.550879441 | 0.653910955 | NA          | NA |
| ASV_16s_14612 | 0.179754328 | -0.603527702 | 3.550879441 | 0.653910955 | NA          | NA |
| ASV_16s_14613 | 0.179754328 | -0.603527702 | 3.550879441 | 0.653910955 | NA          | NA |
| ASV_16s_14614 | 0.057270878 | -0.168700269 | 3.550969543 | 0.279655767 | NA          | NA |



|               |             |              |             |             |             |    |
|---------------|-------------|--------------|-------------|-------------|-------------|----|
| ASV_16s_14615 | 0.057270878 | -0.168700269 | 3.550969543 | 0.279655767 | NA          | NA |
| ASV_16s_14616 | 0.057270878 | -0.168700269 | 3.550969543 | 0.279655767 | NA          | NA |
| ASV_16s_14617 | 0.050799689 | -0.16606484  | 3.551018783 | 0.243008901 | NA          | NA |
| ASV_16s_14618 | 0.039807959 | -0.154620465 | 3.55111121  | 0.17635197  | NA          | NA |
| ASV_16s_14619 | 0.060950733 | -0.168810413 | 3.550941786 | 0.299794187 | NA          | NA |
| ASV_16s_14620 | 0.087098337 | 0.220183988  | 3.550908549 | 0.403809978 | 0.999728074 | NA |
| ASV_16s_14621 | 0.079837583 | 0.220206685  | 3.550938504 | 0.370992587 | NA          | NA |
| ASV_16s_14622 | 0.192176234 | -0.050182695 | 3.550737561 | 1.077031506 | 0.993488395 | NA |
| ASV_16s_14623 | 0.202688521 | -0.404028416 | 3.55077904  | 0.608286883 | NA          | NA |
| ASV_16s_14624 | 0.204520867 | -0.058246828 | 3.550619756 | 1.05864887  | 0.993826165 | NA |
| ASV_16s_14625 | 0.213209971 | -0.559387501 | 3.550774349 | 0.955514233 | 0.99551459  | NA |
| ASV_16s_14626 | 0.23625601  | -0.707195187 | 3.550444107 | 0.861850653 | 0.996760325 | NA |
| ASV_16s_14627 | 0.191932555 | -0.914545331 | 3.550820436 | 0.468701746 | 0.999553205 | NA |
| ASV_16s_14628 | 0.271597821 | -0.246403086 | 3.550051248 | 1.078773193 | 0.993455798 | NA |
| ASV_16s_14629 | 0.265633173 | -0.738468395 | 3.550212249 | 0.959874579 | 0.995450107 | NA |
| ASV_16s_14630 | 0.185254712 | -0.215897167 | 3.550564809 | 0.76207371  | NA          | NA |
| ASV_16s_14631 | 0.227719059 | -0.680661524 | 3.550412833 | 0.906594351 | 0.996197947 | NA |
| ASV_16s_14632 | 0.242059839 | -0.685884973 | 3.550285369 | 0.985503846 | 0.995059002 | NA |
| ASV_16s_14633 | 0.234663939 | -0.66134824  | 3.55030978  | 0.989594847 | 0.994994644 | NA |
| ASV_16s_14634 | 0.24213549  | -0.655302141 | 3.550248418 | 1.037179119 | NA          | NA |
| ASV_16s_14635 | 0.196658584 | 0.225204029  | 3.550491822 | 0.663077616 | NA          | NA |
| ASV_16s_14636 | 0.191895811 | -0.117852084 | 3.550971704 | 0.931894889 | NA          | NA |
| ASV_16s_14637 | 0.234609271 | -0.597934692 | 3.550313425 | 1.054959474 | 0.993892582 | NA |
| ASV_16s_14638 | 0.241938866 | -0.56834902  | 3.551014039 | 0.865224795 | 0.996719945 | NA |
| ASV_16s_14639 | 0.211859983 | -0.571802284 | 3.55046074  | 0.984998402 | NA          | NA |
| ASV_16s_14640 | 0.208910854 | 0.238218885  | 3.550390467 | 1.148614426 | 0.992062319 | NA |
| ASV_16s_14641 | 0.206899719 | 0.844222924  | 3.550591009 | 0.65977189  | 0.998626099 | NA |
| ASV_16s_14642 | 0.233696723 | -0.58126704  | 3.550335855 | 1.060867487 | 0.993786005 | NA |
| ASV_16s_14643 | 0.266949857 | -0.648876144 | 3.550125445 | 1.159574645 | NA          | NA |
| ASV_16s_14644 | 0.22826413  | -0.536442296 | 3.550419177 | 1.05982498  | 0.993804896 | NA |
| ASV_16s_14645 | 0.222692427 | 0.004195769  | 3.5504794   | 1.026401434 | 0.994391327 | NA |
| ASV_16s_14646 | 0.22749739  | -0.440004761 | 3.550532921 | 1.066157651 | NA          | NA |
| ASV_16s_14647 | 0.224933774 | 0.15603259   | 3.55087131  | 1.237046257 | 0.990048752 | NA |
| ASV_16s_14648 | 0.209459515 | -0.615869072 | 3.550977034 | 0.814654651 | 0.997291506 | NA |
| ASV_16s_14649 | 0.244384287 | -0.490453008 | 3.550598439 | 0.840208637 | 0.99701163  | NA |
| ASV_16s_14650 | 0.236902291 | -0.350708213 | 3.550639287 | 1.072220402 | 0.993577901 | NA |
| ASV_16s_14651 | 0.234840577 | -0.35071151  | 3.550626656 | 1.060371047 | 0.993795005 | NA |
| ASV_16s_14652 | 0.222902376 | -0.315021115 | 3.550675984 | 1.022642666 | 0.994454962 | NA |
| ASV_16s_14653 | 0.298724133 | 0.032064821  | 3.550735724 | 1.507314653 | 0.982055346 | NA |
| ASV_16s_14654 | 0.214100867 | 0.305121226  | 3.550662038 | 0.844004749 | 0.996968506 | NA |
| ASV_16s_14655 | 0.203636038 | 0.310856382  | 3.551084186 | 0.720547176 | NA          | NA |
| ASV_16s_14656 | 0.18290322  | 0.206725639  | 3.551022801 | 0.354402426 | 0.999824471 | NA |
| ASV_16s_14657 | 0.25667656  | 1.096868835  | 3.551318632 | 0.559880367 | 0.999196348 | NA |
| ASV_16s_14658 | 0.211995865 | 0.92954363   | 3.550793511 | 1.076392607 | 0.993500326 | NA |
| ASV_16s_14659 | 0.194782633 | 0.371148095  | 3.551545132 | 0.662094849 | NA          | NA |
| ASV_16s_14660 | 0.252472939 | 0.703086128  | 3.550467451 | 0.982296176 | 0.99510909  | NA |
| ASV_16s_14661 | 0.299795982 | 0.561463872  | 3.550056402 | 1.311408583 | 0.988131611 | NA |
| ASV_16s_14662 | 0.147598944 | -0.386262164 | 3.551408067 | 0.480991398 | NA          | NA |
| ASV_16s_14663 | 0.150944906 | 0.350126724  | 3.55180068  | 0.577095181 | NA          | NA |
| ASV_16s_14664 | 0.237889335 | 0.384409661  | 3.551285415 | 0.729376286 | NA          | NA |
| ASV_16s_14665 | 0.235937248 | -0.225364548 | 3.551351718 | 0.705863888 | NA          | NA |
| ASV_16s_14666 | 0.2340789   | 0.354649993  | 3.551752912 | 0.415234056 | NA          | NA |
| ASV_16s_14667 | 0.264820384 | 0.355360855  | 3.551754865 | 0.43455535  | NA          | NA |
| ASV_16s_14668 | 0.206469206 | -1.032115046 | 3.550515791 | 0.371794094 | NA          | NA |
| ASV_16s_14669 | 0.150750371 | -0.50102422  | 3.551111265 | 0.581183197 | NA          | NA |
| ASV_16s_14670 | 0.172186831 | 0.204070477  | 3.550721596 | 0.567948437 | NA          | NA |
| ASV_16s_14671 | 0.271883594 | 1.290461722  | 3.550697124 | 0.745536106 | NA          | NA |
| ASV_16s_14672 | 0.22352556  | 0.402934892  | 3.550997492 | 0.641477927 | NA          | NA |
| ASV_16s_14673 | 0.252776463 | 0.413332879  | 3.550852972 | 0.682734193 | NA          | NA |
| ASV_16s_14674 | 0.229307356 | 0.405189072  | 3.550967205 | 0.650047633 | NA          | NA |
| ASV_16s_14675 | 0.208201681 | 0.396682306  | 3.551084883 | 0.617832542 | NA          | NA |
| ASV_16s_14676 | 0.17186803  | 0.379333604  | 3.551324783 | 0.554974629 | NA          | NA |
| ASV_16s_14677 | 0.17186803  | 0.379333604  | 3.551324783 | 0.554974629 | NA          | NA |
| ASV_16s_14678 | 0.064747986 | 0.342432489  | 3.551808782 | 0.276813141 | NA          | NA |
| ASV_16s_14679 | 0.104477339 | -0.421942151 | 3.551212446 | 0.403118866 | NA          | NA |
| ASV_16s_14680 | 0.104477339 | -0.421942151 | 3.551212446 | 0.403118866 | NA          | NA |
| ASV_16s_14681 | 0.358042973 | -0.548890129 | 3.549615722 | 0.788559815 | NA          | NA |

|               |             |              |             |             |             |    |
|---------------|-------------|--------------|-------------|-------------|-------------|----|
| ASV_16s_14682 | 0.116287676 | -0.448776735 | 3.551106925 | 0.434234582 | NA          | NA |
| ASV_16s_14683 | 0.177535942 | -0.078597711 | 3.550822267 | 0.878723598 | NA          | NA |
| ASV_16s_14684 | 0.177535942 | -0.078597711 | 3.550822267 | 0.878723598 | NA          | NA |
| ASV_16s_14685 | 0.177535942 | -0.078597711 | 3.550822267 | 0.878723598 | NA          | NA |
| ASV_16s_14686 | 0.177535942 | -0.078597711 | 3.550822267 | 0.878723598 | NA          | NA |
| ASV_16s_14687 | 0.184781528 | -0.07863825  | 3.550810247 | 0.898162696 | 0.99630842  | NA |
| ASV_16s_14688 | 0.218409862 | 0.25688168   | 3.550851361 | 1.234596792 | NA          | NA |
| ASV_16s_14689 | 0.132169371 | 0.22009833   | 3.550795654 | 0.579117693 | NA          | NA |
| ASV_16s_14690 | 0.131905438 | 0.220098662  | 3.550796091 | 0.578215981 | NA          | NA |
| ASV_16s_14691 | 0.130408424 | -0.41457402  | 3.55106393  | 0.593605019 | NA          | NA |
| ASV_16s_14692 | 0.271492303 | 1.188252948  | 3.550578533 | 0.845369373 | NA          | NA |
| ASV_16s_14693 | 0.184968717 | -0.067722231 | 3.550698845 | 1.106831754 | NA          | NA |
| ASV_16s_14694 | 0.286892702 | 1.723427015  | 3.550373192 | 0.486482843 | 0.999494486 | NA |
| ASV_16s_14695 | 0.186455272 | -0.068478587 | 3.5506607   | 1.138260749 | NA          | NA |
| ASV_16s_14696 | 0.18695079  | -0.068296737 | 3.550636056 | 1.146480086 | NA          | NA |
| ASV_16s_14697 | 0.202941074 | 0.237665595  | 3.550709546 | 0.777668153 | 0.997665234 | NA |
| ASV_16s_14698 | 0.181005548 | 0.691082803  | 3.550872244 | 1.052786361 | NA          | NA |
| ASV_16s_14699 | 0.189428382 | -0.067885425 | 3.550570161 | 1.16442387  | NA          | NA |
| ASV_16s_14700 | 0.197474883 | 0.356467557  | 3.551804329 | 0.600113571 | NA          | NA |
| ASV_16s_14701 | 0.202763063 | -0.067898337 | 3.550484224 | 1.189795205 | NA          | NA |
| ASV_16s_14702 | 0.318490618 | -0.763995505 | 3.549795746 | 0.81634769  | 0.997273519 | NA |
| ASV_16s_14703 | 0.259584525 | 0.900426621  | 3.551680147 | 0.550909173 | 0.999237899 | NA |
| ASV_16s_14704 | 0.218395859 | 0.523438932  | 3.550958116 | 0.646204161 | 0.998715803 | NA |
| ASV_16s_14705 | 0.263038479 | -0.017776361 | 3.55143851  | 0.707679183 | NA          | NA |
| ASV_16s_14706 | 0.216677939 | 0.319958175  | 3.551053841 | 0.792554051 | 0.997519201 | NA |
| ASV_16s_14707 | 0.301609902 | 1.145442584  | 3.550710482 | 0.757305633 | 0.997855646 | NA |
| ASV_16s_14708 | 0.215727245 | 0.929626248  | 3.550873512 | 0.646876273 | NA          | NA |
| ASV_16s_14709 | 0.053701877 | 0.292678295  | 3.551898003 | 0.289335021 | NA          | NA |
| ASV_16s_14710 | 0.08888094  | 0.285638104  | 3.551779705 | 0.418377146 | NA          | NA |
| ASV_16s_14711 | 0.124632308 | 0.282370038  | 3.551686605 | 0.522590243 | NA          | NA |
| ASV_16s_14712 | 0.263672332 | -0.570223744 | 3.550864087 | 0.679612626 | 0.998487527 | NA |
| ASV_16s_14713 | 0.303262317 | 0.817162924  | 3.49047564  | 0.892904637 | 0.996376245 | NA |
| ASV_16s_14714 | 0.245373051 | 0.323708774  | 3.551007473 | 0.719025815 | 0.998185242 | NA |
| ASV_16s_14715 | 0.235808134 | -0.546531381 | 3.550091707 | 0.655337774 | NA          | NA |
| ASV_16s_14716 | 0.285847075 | 0.343029782  | 3.550051148 | 1.49339799  | NA          | NA |
| ASV_16s_14717 | 0.196574349 | -0.028744321 | 3.550932136 | 0.987559645 | NA          | NA |
| ASV_16s_14718 | 0.196574349 | -0.028744321 | 3.550932136 | 0.987559645 | NA          | NA |
| ASV_16s_14719 | 0.246553633 | 0.334331745  | 3.550238902 | 1.343315644 | NA          | NA |
| ASV_16s_14720 | 0.263876597 | 0.365529263  | 3.550468531 | 1.227084715 | NA          | NA |
| ASV_16s_14721 | 0.271960648 | 0.581256789  | 3.550950319 | 1.081019323 | NA          | NA |
| ASV_16s_14722 | 0.164046956 | -0.073400049 | 3.550880483 | 0.864854664 | NA          | NA |
| ASV_16s_14723 | 0.164046956 | -0.073400049 | 3.550880483 | 0.864854664 | NA          | NA |
| ASV_16s_14724 | 0.271101375 | 0.414191189  | 3.550794734 | 1.169861682 | 0.991604351 | NA |
| ASV_16s_14725 | 0.161099306 | -0.073376465 | 3.550887158 | 0.856192464 | NA          | NA |
| ASV_16s_14726 | 0.247059041 | 0.579159605  | 3.550823781 | 1.28383959  | NA          | NA |
| ASV_16s_14727 | 0.244522701 | 0.344020291  | 3.550271661 | 1.294794374 | NA          | NA |
| ASV_16s_14728 | 0.224236778 | 0.360336357  | 3.551046619 | 1.036264817 | NA          | NA |
| ASV_16s_14729 | 0.224236778 | 0.360336357  | 3.551046619 | 1.036264817 | NA          | NA |
| ASV_16s_14730 | 0.224236778 | 0.360336357  | 3.551046619 | 1.036264817 | NA          | NA |
| ASV_16s_14731 | 0.216948098 | 0.356145095  | 3.551250153 | 0.748229885 | NA          | NA |
| ASV_16s_14732 | 0.214032626 | 0.344246758  | 3.551125865 | 0.743865725 | NA          | NA |
| ASV_16s_14733 | 0.246067398 | 0.342729118  | 3.550989869 | 0.806532545 | 0.997376714 | NA |
| ASV_16s_14734 | 0.228224715 | 0.329408763  | 3.550981552 | 0.83625139  | 0.997056155 | NA |
| ASV_16s_14735 | 0.199338748 | 0.360319253  | 3.551102773 | 0.977681625 | NA          | NA |
| ASV_16s_14736 | 0.199338748 | 0.360319253  | 3.551102773 | 0.977681625 | NA          | NA |
| ASV_16s_14737 | 0.199338748 | 0.360319253  | 3.551102773 | 0.977681625 | NA          | NA |
| ASV_16s_14738 | 0.199338748 | 0.360319253  | 3.551102773 | 0.977681625 | NA          | NA |
| ASV_16s_14739 | 0.199338748 | 0.360319253  | 3.551102773 | 0.977681625 | NA          | NA |
| ASV_16s_14740 | 0.234380101 | 0.315939634  | 3.550893438 | 1.019487604 | 0.994508019 | NA |
| ASV_16s_14741 | 0.223258289 | 0.315939654  | 3.55090861  | 0.995146534 | NA          | NA |
| ASV_16s_14742 | 0.212650224 | 0.315939675  | 3.550924558 | 0.970833006 | 0.995285418 | NA |
| ASV_16s_14743 | 0.211623638 | 0.315939678  | 3.550926186 | 0.968422073 | 0.995321975 | NA |
| ASV_16s_14744 | 0.239657628 | 0.315939626  | 3.550886751 | 1.030430339 | 0.994322603 | NA |
| ASV_16s_14745 | 0.208201681 | 0.315939685  | 3.550931726 | 0.960314179 | NA          | NA |
| ASV_16s_14746 | 0.322152659 | 1.167001608  | 3.550409903 | 0.832717662 | 0.997095545 | NA |
| ASV_16s_14747 | 0.240186863 | 1.096342859  | 3.550744796 | 0.754797838 | NA          | NA |
| ASV_16s_14748 | 0.275425241 | 0.734261721  | 3.550966161 | 1.076494135 | NA          | NA |

|               |             |              |             |             |             |    |
|---------------|-------------|--------------|-------------|-------------|-------------|----|
| ASV_16s_14749 | 0.275425241 | 0.734261721  | 3.550966161 | 1.076494135 | NA          | NA |
| ASV_16s_14750 | 0.275425241 | 0.734261721  | 3.550966161 | 1.076494135 | NA          | NA |
| ASV_16s_14751 | 0.136433453 | 0.730366393  | 3.551353203 | 0.738584326 | NA          | NA |
| ASV_16s_14752 | 0.136433453 | 0.730366393  | 3.551353203 | 0.738584326 | NA          | NA |
| ASV_16s_14753 | 0.255317392 | 0.693185549  | 3.55084269  | 0.997715298 | 0.994865308 | NA |
| ASV_16s_14754 | 0.23470268  | 0.693098875  | 3.550868065 | 0.955683449 | 0.995512099 | NA |
| ASV_16s_14755 | 0.270536447 | 0.69323814   | 3.550826416 | 1.02681485  | 0.9943843   | NA |
| ASV_16s_14756 | 0.263321693 | 0.693215621  | 3.550833892 | 1.013239917 | NA          | NA |
| ASV_16s_14757 | 0.263321693 | 0.693215621  | 3.550833892 | 1.013239917 | NA          | NA |
| ASV_16s_14758 | 0.263321693 | 0.693215621  | 3.550833892 | 1.013239917 | NA          | NA |
| ASV_16s_14759 | 0.228245322 | 0.693068534  | 3.550876954 | 0.941815236 | 0.995713335 | NA |
| ASV_16s_14760 | 0.252373756 | 0.693174017  | 3.550846065 | 0.991887257 | 0.994958347 | NA |
| ASV_16s_14761 | 0.208201681 | 0.692963798  | 3.550908025 | 0.896483308 | NA          | NA |
| ASV_16s_14762 | 0.208201681 | 0.692963798  | 3.550908025 | 0.896483308 | NA          | NA |
| ASV_16s_14763 | 0.175423728 | 0.28970025   | 3.551674019 | 0.62667103  | NA          | NA |
| ASV_16s_14764 | 0.175423728 | 0.28970025   | 3.551674019 | 0.62667103  | NA          | NA |
| ASV_16s_14765 | 0.175423728 | 0.28970025   | 3.551674019 | 0.62667103  | NA          | NA |
| ASV_16s_14766 | 0.175423728 | 0.28970025   | 3.551674019 | 0.62667103  | NA          | NA |
| ASV_16s_14767 | 0.175423728 | 0.28970025   | 3.551674019 | 0.62667103  | NA          | NA |
| ASV_16s_14768 | 0.177753997 | 0.020670057  | 3.551138508 | 0.928778244 | NA          | NA |
| ASV_16s_14769 | 0.178789673 | -0.061757937 | 3.550997232 | 1.012197284 | 0.99462937  | NA |
| ASV_16s_14770 | 0.179566429 | -0.116498537 | 3.550918148 | 1.056267705 | 0.993869083 | NA |
| ASV_16s_14771 | 0.175514993 | -0.10431948  | 3.550967926 | 1.039354624 | 0.994168465 | NA |
| ASV_16s_14772 | 0.179566429 | -0.116498537 | 3.550918148 | 1.056267705 | 0.993869083 | NA |
| ASV_16s_14773 | 0.179566429 | -0.116498537 | 3.550918148 | 1.056267705 | 0.993869083 | NA |
| ASV_16s_14774 | 0.179825348 | -0.133964562 | 3.5508966   | 1.067726699 | 0.993660794 | NA |
| ASV_16s_14775 | 0.179825348 | -0.133964562 | 3.5508966   | 1.067726699 | 0.993660794 | NA |
| ASV_16s_14776 | 0.175526401 | -0.138629176 | 3.550928627 | 1.060570118 | 0.993791397 | NA |
| ASV_16s_14777 | 0.180602105 | -0.184768605 | 3.550843906 | 1.094406224 | 0.993158576 | NA |
| ASV_16s_14778 | 0.180602105 | -0.184768605 | 3.550843906 | 1.094406224 | 0.993158576 | NA |
| ASV_16s_14779 | 0.179094224 | -0.213192891 | 3.550837149 | 1.096528507 | 0.99311758  | NA |
| ASV_16s_14780 | 0.177574935 | -0.209662414 | 3.550852092 | 1.091190075 | 0.993220407 | NA |
| ASV_16s_14781 | 0.178593498 | -0.228093334 | 3.550833126 | 1.090720423 | 0.993229406 | NA |
| ASV_16s_14782 | 0.181378861 | -0.234210901 | 3.550807007 | 1.102294829 | 0.993005408 | NA |
| ASV_16s_14783 | 0.175554921 | -0.221228262 | 3.550862743 | 1.079091007 | 0.993449839 | NA |
| ASV_16s_14784 | 0.18163778  | -0.250564863 | 3.550797842 | 1.09578181  | 0.993132021 | NA |
| ASV_16s_14785 | 0.178092773 | -0.24305884  | 3.550830352 | 1.082301659 | 0.993389444 | NA |
| ASV_16s_14786 | 0.193200495 | -0.287366403 | 3.550688872 | 1.120705644 | 0.992639549 | NA |
| ASV_16s_14787 | 0.175566329 | -0.253883413 | 3.550847805 | 1.064311126 | 0.993723341 | NA |
| ASV_16s_14788 | 0.175572033 | -0.27034997  | 3.550842129 | 1.054762944 | 0.993896107 | NA |
| ASV_16s_14789 | 0.180129899 | -0.27958128  | 3.550800185 | 1.071204651 | 0.993596698 | NA |
| ASV_16s_14790 | 0.17962347  | -0.27857363  | 3.55080473  | 1.069399894 | 0.993630009 | NA |
| ASV_16s_14791 | 0.175572033 | -0.27034997  | 3.550842129 | 1.054762944 | 0.993896107 | NA |
| ASV_16s_14792 | 0.179370255 | -0.27806809  | 3.550807013 | 1.068494975 | 0.99364667  | NA |
| ASV_16s_14793 | 0.182414536 | -0.300320483 | 3.550775826 | 1.067630147 | 0.993662567 | NA |
| ASV_16s_14794 | 0.179375959 | -0.294546355 | 3.550802272 | 1.057246142 | 0.993851471 | NA |
| ASV_16s_14795 | 0.203857412 | -0.380610576 | 3.550602476 | 1.084300184 | 0.993351672 | NA |
| ASV_16s_14796 | 0.17559485  | -0.338168261 | 3.550828846 | 1.002571337 | NA          | NA |
| ASV_16s_14797 | 0.17559485  | -0.338168261 | 3.550828846 | 1.002571337 | NA          | NA |
| ASV_16s_14798 | 0.17965199  | -0.362827362 | 3.550796388 | 0.998133748 | 0.994858586 | NA |
| ASV_16s_14799 | 0.213593668 | -0.406714916 | 3.550532737 | 1.087282479 | 0.993295053 | NA |
| ASV_16s_14800 | 0.175606258 | -0.37318296  | 3.550829368 | 0.967491741 | NA          | NA |
| ASV_16s_14801 | 0.175606258 | -0.37318296  | 3.550829368 | 0.967491741 | NA          | NA |
| ASV_16s_14802 | 0.06271187  | -0.255368064 | 3.55174113  | 0.336938524 | NA          | NA |
| ASV_16s_14803 | 0.269353096 | -0.678129401 | 3.550383869 | 0.789989548 | 0.997544776 | NA |
| ASV_16s_14804 | 0.259656603 | -0.675423299 | 3.550438182 | 0.77789507  | 0.997663051 | NA |
| ASV_16s_14805 | 0.242989958 | -0.667236374 | 3.55052662  | 0.755779363 | 0.99786949  | NA |
| ASV_16s_14806 | 0.229133059 | -0.658422008 | 3.550602197 | 0.736133618 | 0.998042437 | NA |
| ASV_16s_14807 | 0.22588754  | -0.655848684 | 3.550619188 | 0.731340476 | 0.998083172 | NA |
| ASV_16s_14808 | 0.219396502 | -0.650585582 | 3.550654492 | 0.721585905 | NA          | NA |
| ASV_16s_14809 | 0.219396502 | -0.650585582 | 3.550654492 | 0.721585905 | NA          | NA |
| ASV_16s_14810 | 0.195902997 | -0.627838227 | 3.550792996 | 0.683493186 | 0.998459377 | NA |
| ASV_16s_14811 | 0.186557238 | -0.614174256 | 3.550841947 | 0.666678623 | NA          | NA |
| ASV_16s_14812 | 0.211048796 | -0.6432536   | 3.550702219 | 0.708515903 | 0.998269446 | NA |
| ASV_16s_14813 | 0.180226868 | -0.604256896 | 3.550876847 | 0.654769823 | 0.998659643 | NA |
| ASV_16s_14814 | 0.175669002 | -0.596908305 | 3.550903208 | 0.645975195 | NA          | NA |
| ASV_16s_14815 | 0.175669002 | -0.596908305 | 3.550903208 | 0.645975195 | NA          | NA |

|               |             |              |             |             |             |    |
|---------------|-------------|--------------|-------------|-------------|-------------|----|
| ASV_16s_14816 | 0.175669002 | -0.596908305 | 3.550903208 | 0.645975195 | NA          | NA |
| ASV_16s_14817 | 0.175669002 | -0.596908305 | 3.550903208 | 0.645975195 | NA          | NA |
| ASV_16s_14818 | 0.236162747 | 1.439097075  | 3.550809176 | 0.531371093 | 0.999323313 | NA |
| ASV_16s_14819 | 0.068278379 | 0.072038078  | 3.55090814  | 0.512758204 | 0.999398412 | NA |
| ASV_16s_14820 | 0.059014763 | 0.220302634  | 3.551065214 | 0.266518778 | NA          | NA |
| ASV_16s_14821 | 0.059014763 | 0.220302634  | 3.551065214 | 0.266518778 | NA          | NA |
| ASV_16s_14822 | 0.078023093 | 0.22021305   | 3.550946887 | 0.362463818 | NA          | NA |
| ASV_16s_14823 | 0.224875086 | -0.39847174  | 3.550818287 | 1.062930279 | 0.993748516 | NA |
| ASV_16s_14824 | 0.208171311 | -0.056456108 | 3.550642088 | 1.089480148 | 0.993253136 | NA |
| ASV_16s_14825 | 0.180902512 | -0.096017579 | 3.550784515 | 0.897417485 | 0.996318083 | NA |
| ASV_16s_14826 | 0.220073036 | -0.682671464 | 3.550606027 | 0.771516111 | 0.997723891 | NA |
| ASV_16s_14827 | 0.248106532 | 1.161656142  | 3.550813932 | 0.639083313 | NA          | NA |
| ASV_16s_14828 | 0.236588053 | -0.697295611 | 3.550368068 | 0.909962421 | 0.996153225 | NA |
| ASV_16s_14829 | 0.202188584 | -0.250221336 | 3.55041435  | 0.799795187 | 0.997446043 | NA |
| ASV_16s_14830 | 0.192391095 | -0.006848378 | 3.550910471 | 0.588348204 | NA          | NA |
| ASV_16s_14831 | 0.098006597 | -0.205038628 | 3.550627452 | 0.433327894 | 0.99965585  | NA |
| ASV_16s_14832 | 0.223544106 | -0.673429088 | 3.550439798 | 0.898361648 | 0.996305838 | NA |
| ASV_16s_14833 | 0.182078191 | 0.232719313  | 3.550777162 | 1.026761802 | 0.994385202 | NA |
| ASV_16s_14834 | 0.197087755 | -0.89153024  | 3.550602227 | 0.524974239 | NA          | NA |
| ASV_16s_14835 | 0.188631768 | -0.201714669 | 3.550552676 | 0.827703061 | 0.997150848 | NA |
| ASV_16s_14836 | 0.193166625 | 0.679408401  | 3.551280354 | 0.823604536 | NA          | NA |
| ASV_16s_14837 | 0.206488898 | 0.398296183  | 3.550807262 | 1.084779746 | 0.993342588 | NA |
| ASV_16s_14838 | 0.234397076 | -0.668971003 | 3.550324923 | 0.97326005  | NA          | NA |
| ASV_16s_14839 | 0.202752024 | 0.231781863  | 3.550765125 | 0.735886081 | NA          | NA |
| ASV_16s_14840 | 0.126319453 | -0.20996043  | 3.550429494 | 0.681438009 | NA          | NA |
| ASV_16s_14841 | 0.203033883 | 1.031923918  | 3.550152299 | 0.496983066 | NA          | NA |
| ASV_16s_14842 | 0.216369326 | -0.609634517 | 3.550420346 | 0.970050069 | 0.99529731  | NA |
| ASV_16s_14843 | 0.215411552 | -0.974212391 | 3.550517749 | 0.601900505 | NA          | NA |
| ASV_16s_14844 | 0.209386962 | 0.064144465  | 3.550348147 | 1.104541234 | 0.992961397 | NA |
| ASV_16s_14845 | 0.228479827 | -0.619443463 | 3.550514861 | 0.910038948 | 0.996152205 | NA |
| ASV_16s_14846 | 0.232163384 | 0.278336959  | 3.551352287 | 0.720991654 | 0.998169196 | NA |
| ASV_16s_14847 | 0.212497705 | -0.573580496 | 3.550455743 | 0.981422262 | 0.99512268  | NA |
| ASV_16s_14848 | 0.236650347 | -0.199489111 | 3.55026583  | 0.985893044 | 0.995052902 | NA |
| ASV_16s_14849 | 0.204861925 | -0.502945715 | 3.550555334 | 0.984060415 | NA          | NA |
| ASV_16s_14850 | 0.170540744 | 0.314611037  | 3.550834928 | 0.593918224 | 0.999024791 | NA |
| ASV_16s_14851 | 0.185906313 | -0.37261191  | 3.550958935 | 0.997795476 | NA          | NA |
| ASV_16s_14852 | 0.230871229 | -0.516635461 | 3.550437487 | 1.068333524 | NA          | NA |
| ASV_16s_14853 | 0.214694634 | -0.493817544 | 3.550518686 | 1.017473159 | 0.994541724 | NA |
| ASV_16s_14854 | 0.215960117 | -0.491144149 | 3.551025816 | 0.842478001 | 0.996985899 | NA |
| ASV_16s_14855 | 0.204229987 | -0.482750554 | 3.550572067 | 0.985028376 | NA          | NA |
| ASV_16s_14856 | 0.243859559 | -0.548730475 | 3.550347888 | 1.11236264  | 0.992806801 | NA |
| ASV_16s_14857 | 0.229566699 | -0.495497459 | 3.550464925 | 1.066970319 | 0.993674679 | NA |
| ASV_16s_14858 | 0.222810798 | -0.464320999 | 3.550520935 | 1.047308572 | NA          | NA |
| ASV_16s_14859 | 0.222689584 | -0.475865339 | 3.550508214 | 1.043534559 | 0.994095363 | NA |
| ASV_16s_14860 | 0.184002419 | -0.452984295 | 3.55091842  | 0.726172893 | 0.998126455 | NA |
| ASV_16s_14861 | 0.265478083 | -0.048834167 | 3.550690128 | 1.28472914  | 0.988843439 | NA |
| ASV_16s_14862 | 0.259438627 | -0.335350082 | 3.551069783 | 0.639516861 | 0.998758537 | NA |
| ASV_16s_14863 | 0.221424399 | -0.472650572 | 3.551043557 | 0.712535074 | 0.998237558 | NA |
| ASV_16s_14864 | 0.242056039 | 0.240448908  | 3.55070894  | 0.926050235 | NA          | NA |
| ASV_16s_14865 | 0.216237648 | 0.22104493   | 3.54963972  | 1.052168378 | 0.993942524 | NA |
| ASV_16s_14866 | 0.210801439 | -0.080638175 | 3.550980249 | 0.688147245 | NA          | NA |
| ASV_16s_14867 | 0.147261279 | 0.330340866  | 3.550750484 | 0.88619254  | 0.996461641 | NA |
| ASV_16s_14868 | 0.243707746 | 0.733361492  | 3.550461864 | 0.939768378 | 0.995742532 | NA |
| ASV_16s_14869 | 0.219477676 | -0.326006038 | 3.550416386 | 0.414369408 | NA          | NA |
| ASV_16s_14870 | 0.189759701 | 1.002819031  | 3.551196172 | 0.625975964 | NA          | NA |
| ASV_16s_14871 | 0.24163253  | 1.034158757  | 3.550871363 | 0.733722918 | NA          | NA |
| ASV_16s_14872 | 0.167065498 | 0.20931795   | 3.551022427 | 0.33663789  | 0.999852375 | NA |
| ASV_16s_14873 | 0.339554112 | 0.271671876  | 3.550663451 | 0.844817897 | NA          | NA |
| ASV_16s_14874 | 0.200782656 | 1.214824715  | 3.551003098 | 0.639553507 | NA          | NA |
| ASV_16s_14875 | 0.207412498 | 0.980979884  | 3.551221877 | 0.659852046 | NA          | NA |
| ASV_16s_14876 | 0.230448858 | 0.382928547  | 3.551330072 | 0.718751941 | NA          | NA |
| ASV_16s_14877 | 0.254886318 | 0.388304307  | 3.551184353 | 0.752589653 | NA          | NA |
| ASV_16s_14878 | 0.254886318 | 0.388304307  | 3.551184353 | 0.752589653 | NA          | NA |
| ASV_16s_14879 | 0.14751434  | 0.349013441  | 3.551818006 | 0.569504011 | NA          | NA |
| ASV_16s_14880 | 0.14751434  | 0.349013441  | 3.551818006 | 0.569504011 | NA          | NA |
| ASV_16s_14881 | 0.15383858  | 0.162984626  | 3.551415886 | 0.782777005 | NA          | NA |
| ASV_16s_14882 | 0.268114676 | 0.391842586  | 3.55110869  | 0.769534799 | NA          | NA |

|               |             |              |             |             |             |    |
|---------------|-------------|--------------|-------------|-------------|-------------|----|
| ASV_16s_14883 | 0.340669695 | -0.787202    | 3.54998658  | 0.872104982 | NA          | NA |
| ASV_16s_14884 | 0.128085369 | 0.339553308  | 3.552037087 | 0.309628741 | 0.999888682 | NA |
| ASV_16s_14885 | 0.245278938 | 0.116503111  | 3.551393029 | 0.571454615 | NA          | NA |
| ASV_16s_14886 | 0.212077393 | -0.552501638 | 3.550555139 | 0.691192352 | NA          | NA |
| ASV_16s_14887 | 0.208313029 | -0.976180438 | 3.550653246 | 0.437574115 | NA          | NA |
| ASV_16s_14888 | 0.149095603 | -0.410538006 | 3.55070893  | 0.623133313 | 0.998859183 | NA |
| ASV_16s_14889 | 0.07364696  | 0.438602256  | 3.551823937 | 0.268928412 | NA          | NA |
| ASV_16s_14890 | 0.113997761 | 1.066051375  | 3.551222663 | 0.394278468 | NA          | NA |
| ASV_16s_14891 | 0.113997761 | 1.066051375  | 3.551222663 | 0.394278468 | NA          | NA |
| ASV_16s_14892 | 0.141279215 | 1.136815135  | 3.551064869 | 0.461158565 | NA          | NA |
| ASV_16s_14893 | 0.195432321 | 1.232325033  | 3.550809607 | 0.570122197 | NA          | NA |
| ASV_16s_14894 | 0.217691934 | 1.003412019  | 3.550544518 | 1.009070312 | 0.99468089  | NA |
| ASV_16s_14895 | 0.234786271 | 0.848890798  | 3.550416012 | 1.15302471  | 0.991968583 | NA |
| ASV_16s_14896 | 0.185962161 | 0.386554832  | 3.551232869 | 0.580699677 | 0.999094079 | NA |
| ASV_16s_14897 | 0.167961939 | 0.378003569  | 3.551347115 | 0.547362629 | NA          | NA |
| ASV_16s_14898 | 0.167961939 | 0.378003569  | 3.551347115 | 0.547362629 | NA          | NA |
| ASV_16s_14899 | 0.167961939 | 0.378003569  | 3.551347115 | 0.547362629 | NA          | NA |
| ASV_16s_14900 | 0.063276441 | 0.342337905  | 3.551814133 | 0.271589927 | NA          | NA |
| ASV_16s_14901 | 0.102102854 | -0.416348622 | 3.551232456 | 0.396658085 | NA          | NA |
| ASV_16s_14902 | 0.102102854 | -0.416348622 | 3.551232456 | 0.396658085 | NA          | NA |
| ASV_16s_14903 | 0.102102854 | -0.416348622 | 3.551232456 | 0.396658085 | NA          | NA |
| ASV_16s_14904 | 0.250466984 | -0.547276562 | 3.550011071 | 0.67442679  | NA          | NA |
| ASV_16s_14905 | 0.330576663 | -0.548574015 | 3.549692483 | 0.762926922 | NA          | NA |
| ASV_16s_14906 | 0.242547292 | 0.686440282  | 3.550095531 | 1.034237804 | NA          | NA |
| ASV_16s_14907 | 0.124001574 | -0.465115053 | 3.551032306 | 0.453439287 | NA          | NA |
| ASV_16s_14908 | 0.124001574 | -0.465115053 | 3.551032306 | 0.453439287 | NA          | NA |
| ASV_16s_14909 | 0.124001574 | -0.465115053 | 3.551032306 | 0.453439287 | NA          | NA |
| ASV_16s_14910 | 0.124001574 | -0.465115053 | 3.551032306 | 0.453439287 | NA          | NA |
| ASV_16s_14911 | 0.124001574 | -0.465115053 | 3.551032306 | 0.453439287 | NA          | NA |
| ASV_16s_14912 | 0.124001574 | -0.465115053 | 3.551032306 | 0.453439287 | NA          | NA |
| ASV_16s_14913 | 0.173501034 | -0.078573872 | 3.550829408 | 0.867555095 | NA          | NA |
| ASV_16s_14914 | 0.113708997 | 0.220125261  | 3.550831113 | 0.512711094 | NA          | NA |
| ASV_16s_14915 | 0.122335894 | 0.220111565  | 3.550813221 | 0.544572269 | 0.999266357 | NA |
| ASV_16s_14916 | 0.129165521 | 0.220102204  | 3.550800744 | 0.568741728 | NA          | NA |
| ASV_16s_14917 | 0.220450879 | 0.310940218  | 3.550884866 | 0.965940058 | NA          | NA |
| ASV_16s_14918 | 0.210055139 | 0.310941168  | 3.550899502 | 0.941831785 | 0.995713098 | NA |
| ASV_16s_14919 | 0.192223162 | 0.310943033  | 3.550928265 | 0.898000289 | NA          | NA |
| ASV_16s_14920 | 0.219753101 | 0.310940279  | 3.550885805 | 0.96435509  | NA          | NA |
| ASV_16s_14921 | 0.136065683 | 0.59594188   | 3.550751821 | 0.529321272 | NA          | NA |
| ASV_16s_14922 | 0.135583146 | 1.301487811  | 3.551240736 | 0.265466015 | NA          | NA |
| ASV_16s_14923 | 0.208375916 | 1.34848891   | 3.551003966 | 0.505999569 | NA          | NA |
| ASV_16s_14924 | 0.237523589 | 0.331576422  | 3.551950414 | 0.415674686 | NA          | NA |
| ASV_16s_14925 | 0.185118191 | -0.068098904 | 3.550720979 | 1.083941871 | 0.993358454 | NA |
| ASV_16s_14926 | 0.180438291 | -0.067844114 | 3.550725165 | 1.078929276 | NA          | NA |
| ASV_16s_14927 | 0.214431547 | 0.533401309  | 3.550867628 | 0.952223591 | 0.995562862 | NA |
| ASV_16s_14928 | 0.163184632 | -0.948347753 | 3.550513241 | 0.297184767 | 0.999903105 | NA |
| ASV_16s_14929 | 0.184402437 | -0.067999499 | 3.550610529 | 1.144957156 | NA          | NA |
| ASV_16s_14930 | 0.209634563 | 0.146481825  | 3.550297024 | 1.428963358 | 0.984667582 | NA |
| ASV_16s_14931 | 0.159957083 | 0.313406477  | 3.551798233 | 0.33721626  | 0.999851518 | NA |
| ASV_16s_14932 | 0.185393474 | -0.067771781 | 3.550605331 | 1.140468787 | NA          | NA |
| ASV_16s_14933 | 0.18264918  | 0.323833018  | 3.55142463  | 0.580475818 | NA          | NA |
| ASV_16s_14934 | 0.203844813 | 0.004824488  | 3.550681854 | 0.887174573 | NA          | NA |
| ASV_16s_14935 | 0.197628346 | -0.067401193 | 3.550579004 | 1.139246184 | NA          | NA |
| ASV_16s_14936 | 0.195028557 | -0.049570249 | 3.550786217 | 1.067536517 | NA          | NA |
| ASV_16s_14937 | 0.228909548 | 0.322551438  | 3.551200039 | 0.654447807 | NA          | NA |
| ASV_16s_14938 | 0.19637588  | 0.714960586  | 3.55132544  | 0.845763274 | 0.996948393 | NA |
| ASV_16s_14939 | 0.344944066 | 0.289407231  | 3.551117897 | 0.883055464 | NA          | NA |
| ASV_16s_14940 | 0.146271474 | 0.28078112   | 3.5516465   | 0.576848613 | NA          | NA |
| ASV_16s_14941 | 0.146271474 | 0.28078112   | 3.5516465   | 0.576848613 | NA          | NA |
| ASV_16s_14942 | 0.112864454 | 0.283354587  | 3.551713089 | 0.480281312 | 0.999515528 | NA |
| ASV_16s_14943 | 0.24499472  | 0.279789413  | 3.551452705 | 0.762400676 | NA          | NA |
| ASV_16s_14944 | 0.171074416 | -0.493136582 | 3.551255222 | 0.624055607 | NA          | NA |
| ASV_16s_14945 | 0.39629812  | -0.565257086 | 3.549705382 | 0.891681442 | NA          | NA |
| ASV_16s_14946 | 0.361890142 | 0.122048465  | 3.550639218 | 1.31007375  | NA          | NA |
| ASV_16s_14947 | 0.322023561 | 0.359294176  | 3.551543087 | 0.586111844 | 0.999066125 | NA |
| ASV_16s_14948 | 0.224360199 | 0.321584815  | 3.55102231  | 0.721598157 | 0.998164227 | NA |
| ASV_16s_14949 | 0.230448858 | -0.545768024 | 3.550123076 | 0.647946466 | NA          | NA |

|               |             |              |             |             |             |    |
|---------------|-------------|--------------|-------------|-------------|-------------|----|
| ASV_16s_14950 | 0.234683302 | 1.139359132  | 3.550343087 | 0.998359954 | NA          | NA |
| ASV_16s_14951 | 0.238701219 | 1.057181704  | 3.550462564 | 1.017820887 | 0.994535915 | NA |
| ASV_16s_14952 | 0.219207202 | 1.009721473  | 3.550592566 | 0.954076791 | NA          | NA |
| ASV_16s_14953 | 0.211005071 | 1.307413629  | 3.550708969 | 0.513135615 | NA          | NA |
| ASV_16s_14954 | 0.2155755   | 0.859359669  | 3.550802297 | 0.933739803 | NA          | NA |
| ASV_16s_14955 | 0.145606032 | -0.078371795 | 3.550889427 | 0.784407324 | NA          | NA |
| ASV_16s_14956 | 0.145606032 | -0.078371795 | 3.550889427 | 0.784407324 | NA          | NA |
| ASV_16s_14957 | 0.202734852 | -0.115991772 | 3.550374227 | 1.153870344 | NA          | NA |
| ASV_16s_14958 | 0.33846086  | 0.897456901  | 3.549898101 | 1.387047878 | 0.985964676 | NA |
| ASV_16s_14959 | 0.324697619 | 0.417232182  | 3.550815837 | 1.9447304   | 0.962835921 | NA |
| ASV_16s_14960 | 0.321403774 | -0.029227451 | 3.550772349 | 1.233785773 | NA          | NA |
| ASV_16s_14961 | 0.262651282 | 0.409656393  | 3.550875382 | 1.699940875 | 0.97457072  | NA |
| ASV_16s_14962 | 0.19210675  | -0.028715789 | 3.550941695 | 0.976236039 | NA          | NA |
| ASV_16s_14963 | 0.256400198 | 0.416686413  | 3.550658781 | 1.14585864  | 0.99212054  | NA |
| ASV_16s_14964 | 0.219506411 | -0.073726947 | 3.550788165 | 1.007079988 | NA          | NA |
| ASV_16s_14965 | 0.243208651 | 0.260006154  | 3.550602351 | 1.502957203 | 0.982207105 | NA |
| ASV_16s_14966 | 0.190694512 | 0.301828602  | 3.550596653 | 1.096707544 | NA          | NA |
| ASV_16s_14967 | 0.217865751 | -0.07371674  | 3.550790255 | 1.003213397 | 0.994776533 | NA |
| ASV_16s_14968 | 0.261370626 | 0.58122335   | 3.55096009  | 1.057893828 | NA          | NA |
| ASV_16s_14969 | 0.268280164 | 0.351343171  | 3.55028386  | 1.291844336 | NA          | NA |
| ASV_16s_14970 | 0.257147922 | 0.405940184  | 3.550794214 | 1.129868318 | NA          | NA |
| ASV_16s_14971 | 0.219140487 | 0.360333163  | 3.551057101 | 1.02471049  | NA          | NA |
| ASV_16s_14972 | 0.346914649 | 0.363396958  | 3.550742279 | 0.948390932 | 0.99561866  | NA |
| ASV_16s_14973 | 0.282699152 | 0.334248261  | 3.550905739 | 0.918430393 | 0.996039283 | NA |
| ASV_16s_14974 | 0.332507993 | 0.36335899   | 3.550607475 | 0.924066858 | NA          | NA |
| ASV_16s_14975 | 0.194808322 | 0.360315661  | 3.551114542 | 0.966291627 | NA          | NA |
| ASV_16s_14976 | 0.201725276 | 0.407544366  | 3.55107149  | 1.183142261 | NA          | NA |
| ASV_16s_14977 | 0.208602759 | 0.315939698  | 3.550931083 | 0.961214136 | 0.995430177 | NA |
| ASV_16s_14978 | 0.203469825 | 0.31593971   | 3.550939709 | 0.948863768 | NA          | NA |
| ASV_16s_14979 | 0.203469825 | 0.31593971   | 3.550939709 | 0.948863768 | NA          | NA |
| ASV_16s_14980 | 0.203469825 | 0.31593971   | 3.550939709 | 0.948863768 | NA          | NA |
| ASV_16s_14981 | 0.203469825 | 0.31593971   | 3.550939709 | 0.948863768 | NA          | NA |
| ASV_16s_14982 | 0.203469825 | 0.31593971   | 3.550939709 | 0.948863768 | NA          | NA |
| ASV_16s_14983 | 0.203469825 | 0.499664958  | 3.550900903 | 1.441231343 | 0.984274785 | NA |
| ASV_16s_14984 | 0.193771849 | 0.687811438  | 3.550896857 | 0.836762583 | NA          | NA |
| ASV_16s_14985 | 0.193771849 | 0.687811438  | 3.550896857 | 0.836762583 | NA          | NA |
| ASV_16s_14986 | 0.297385398 | 1.173275184  | 3.55052453  | 0.810642345 | NA          | NA |
| ASV_16s_14987 | 0.289860112 | 1.176136314  | 3.55067749  | 0.82185986  | NA          | NA |
| ASV_16s_14988 | 0.222543912 | 0.733939678  | 3.551058416 | 0.969589532 | 0.995304296 | NA |
| ASV_16s_14989 | 0.269165576 | 0.734229725  | 3.550975206 | 1.064877278 | NA          | NA |
| ASV_16s_14990 | 0.269165576 | 0.734229725  | 3.550975206 | 1.064877278 | NA          | NA |
| ASV_16s_14991 | 0.269165576 | 0.734229725  | 3.550975206 | 1.064877278 | NA          | NA |
| ASV_16s_14992 | 0.269165576 | 0.734229725  | 3.550975206 | 1.064877278 | NA          | NA |
| ASV_16s_14993 | 0.269165576 | 0.734229725  | 3.550975206 | 1.064877278 | NA          | NA |
| ASV_16s_14994 | 0.287252333 | 1.104767969  | 3.550600953 | 0.827375814 | 0.997154433 | NA |
| ASV_16s_14995 | 0.133332693 | 0.729799488  | 3.551369869 | 0.728324888 | NA          | NA |
| ASV_16s_14996 | 0.133332693 | 0.729799488  | 3.551369869 | 0.728324888 | NA          | NA |
| ASV_16s_14997 | 0.25023678  | 0.693165689  | 3.550848561 | 0.987631096 | NA          | NA |
| ASV_16s_14998 | 0.269361698 | 0.693234733  | 3.550827619 | 1.024569034 | 0.994422407 | NA |
| ASV_16s_14999 | 0.218696275 | 0.693020621  | 3.550891066 | 0.920602873 | 0.996009703 | NA |
| ASV_16s_15000 | 0.255520746 | 0.693186523  | 3.550842462 | 0.998103748 | 0.994859068 | NA |
| ASV_16s_15001 | 0.257337109 | 0.69319349   | 3.550840423 | 1.001656382 | NA          | NA |
| ASV_16s_15002 | 0.257337109 | 0.69319349   | 3.550840423 | 1.001656382 | NA          | NA |
| ASV_16s_15003 | 0.203469825 | 0.692934722  | 3.550916264 | 0.885172248 | NA          | NA |
| ASV_16s_15004 | 0.203469825 | 0.692934722  | 3.550916264 | 0.885172248 | NA          | NA |
| ASV_16s_15005 | 0.203469825 | 0.692934722  | 3.550916264 | 0.885172248 | NA          | NA |
| ASV_16s_15006 | 0.171344106 | 0.290772962  | 3.551696023 | 0.618728996 | NA          | NA |
| ASV_16s_15007 | 0.171344106 | 0.290772962  | 3.551696023 | 0.618728996 | NA          | NA |
| ASV_16s_15008 | 0.171344106 | 0.290772962  | 3.551696023 | 0.618728996 | NA          | NA |
| ASV_16s_15009 | 0.171401147 | 0.007160425  | 3.551166372 | 0.927239918 | NA          | NA |
| ASV_16s_15010 | 0.171418259 | -0.053217808 | 3.55106854  | 0.983456129 | 0.995091015 | NA |
| ASV_16s_15011 | 0.17496897  | -0.084742196 | 3.550997416 | 1.014873463 | 0.994585025 | NA |
| ASV_16s_15012 | 0.175227889 | -0.103369958 | 3.550971822 | 1.029090006 | 0.994345525 | NA |
| ASV_16s_15013 | 0.181503383 | -0.13851762  | 3.550878156 | 1.06699356  | 0.993674253 | NA |
| ASV_16s_15014 | 0.190558536 | -0.161209479 | 3.550779138 | 1.106465492 | 0.99292356  | NA |
| ASV_16s_15015 | 0.205177365 | -0.218021204 | 3.550606386 | 1.179426737 | 0.991392903 | NA |
| ASV_16s_15016 | 0.171446779 | -0.143905932 | 3.550958639 | 1.044955577 | 0.994070378 | NA |

|               |             |              |             |             |             |    |
|---------------|-------------|--------------|-------------|-------------|-------------|----|
| ASV_16s_15017 | 0.171452483 | -0.161087373 | 3.550942688 | 1.053189094 | 0.99392429  | NA |
| ASV_16s_15018 | 0.176263564 | -0.173845506 | 3.5508894   | 1.070537576 | 0.993609023 | NA |
| ASV_16s_15019 | 0.176781402 | -0.207763483 | 3.550860204 | 1.081647608 | 0.993401775 | NA |
| ASV_16s_15020 | 0.171463891 | -0.194875683 | 3.550915725 | 1.064539861 | 0.993719165 | NA |
| ASV_16s_15021 | 0.177040321 | -0.2245716   | 3.55084828  | 1.081679318 | 0.993401178 | NA |
| ASV_16s_15022 | 0.18428939  | -0.255956631 | 3.550774683 | 1.099154681 | 0.993066635 | NA |
| ASV_16s_15023 | 0.171481004 | -0.244955081 | 3.550887404 | 1.048492752 | 0.994007895 | NA |
| ASV_16s_15024 | 0.174519581 | -0.251613361 | 3.55085795  | 1.060213927 | 0.993797852 | NA |
| ASV_16s_15025 | 0.190863087 | -0.299075461 | 3.550706262 | 1.099352005 | 0.993062798 | NA |
| ASV_16s_15026 | 0.184832786 | -0.288673074 | 3.55075951  | 1.081970362 | 0.993395692 | NA |
| ASV_16s_15027 | 0.190733402 | -0.298880467 | 3.550707312 | 1.10090533  | 0.993032542 | NA |
| ASV_16s_15028 | 0.177817077 | -0.274914639 | 3.550821329 | 1.062794695 | 0.993750985 | NA |
| ASV_16s_15029 | 0.188409056 | -0.311058908 | 3.55072569  | 1.082762233 | 0.993380751 | NA |
| ASV_16s_15030 | 0.175037419 | -0.286007363 | 3.550841897 | 1.041950362 | 0.994123137 | NA |
| ASV_16s_15031 | 0.171498116 | -0.295592992 | 3.550868735 | 1.01738691  | 0.994543164 | NA |
| ASV_16s_15032 | 0.17732776  | -0.324268695 | 3.550815291 | 1.023476648 | 0.994440883 | NA |
| ASV_16s_15033 | 0.191781596 | -0.34864096  | 3.550696755 | 1.063863514 | 0.993731509 | NA |
| ASV_16s_15034 | 0.171509524 | -0.330121855 | 3.550862232 | 0.989256953 | 0.99499998  | NA |
| ASV_16s_15035 | 0.175572369 | -0.373091348 | 3.55082975  | 0.967308188 | 0.995338803 | NA |
| ASV_16s_15036 | 0.177896934 | -0.533343587 | 3.550867301 | 0.762119681 | 0.997811592 | NA |
| ASV_16s_15037 | 0.061253455 | -0.24815747  | 3.551749083 | 0.33120878  | NA          | NA |
| ASV_16s_15038 | 0.214294257 | -0.646232342 | 3.550683499 | 0.713662743 | NA          | NA |
| ASV_16s_15039 | 0.200301552 | -0.633068012 | 3.550767853 | 0.690984592 | 0.998404052 | NA |
| ASV_16s_15040 | 0.195439354 | -0.6271851   | 3.550795622 | 0.68262594  | 0.998465698 | NA |
| ASV_16s_15041 | 0.182218697 | -0.607386782 | 3.550865747 | 0.658509522 | NA          | NA |
| ASV_16s_15042 | 0.182218697 | -0.607386782 | 3.550865747 | 0.658509522 | NA          | NA |
| ASV_16s_15043 | 0.182218697 | -0.607386782 | 3.550865747 | 0.658509522 | NA          | NA |
| ASV_16s_15044 | 0.197401888 | -0.629737686 | 3.550784792 | 0.686036174 | 0.998440743 | NA |
| ASV_16s_15045 | 0.174369039 | -0.594706365 | 3.550910795 | 0.643385563 | NA          | NA |
| ASV_16s_15046 | 0.171583677 | -0.589753068 | 3.550926011 | 0.637861707 | NA          | NA |
| ASV_16s_15047 | 0.171583677 | -0.589753068 | 3.550926011 | 0.637861707 | NA          | NA |
| ASV_16s_15048 | 0.171583677 | -0.589753068 | 3.550926011 | 0.637861707 | NA          | NA |
| ASV_16s_15049 | 0.171583677 | -0.589753068 | 3.550926011 | 0.637861707 | NA          | NA |
| ASV_16s_15050 | 0.171583677 | -0.589753068 | 3.550926011 | 0.637861707 | NA          | NA |
| ASV_16s_15051 | 0.171583677 | -0.589753068 | 3.550926011 | 0.637861707 | NA          | NA |
| ASV_16s_15052 | 0.054667657 | -0.168613317 | 3.550991456 | 0.265124076 | NA          | NA |
| ASV_16s_15053 | 0.054667657 | -0.168613317 | 3.550991456 | 0.265124076 | NA          | NA |
| ASV_16s_15054 | 0.048490613 | -0.163882813 | 3.551034933 | 0.229437236 | NA          | NA |
| ASV_16s_15055 | 0.076208602 | 0.220219713  | 3.550955667 | 0.353842469 | NA          | NA |
| ASV_16s_15056 | 0.176255098 | 0.032848398  | 3.550943231 | 0.996382966 | 0.994886673 | NA |
| ASV_16s_15057 | 0.183205978 | -0.390295894 | 3.550874857 | 0.640790259 | NA          | NA |
| ASV_16s_15058 | 0.193839294 | 0.303440676  | 3.551048479 | 1.036388163 | 0.994219994 | NA |
| ASV_16s_15059 | 0.182580049 | 0.222283569  | 3.550921196 | 1.0069771   | 0.9947152   | NA |
| ASV_16s_15060 | 0.193778086 | 0.171824201  | 3.55071297  | 1.054938044 | 0.993892966 | NA |
| ASV_16s_15061 | 0.175083921 | -0.272621395 | 3.550765501 | 0.667629323 | NA          | NA |
| ASV_16s_15062 | 0.235993385 | -0.708383166 | 3.550476952 | 0.835328086 | 0.99706648  | NA |
| ASV_16s_15063 | 0.208917818 | -0.475408827 | 3.550865212 | 0.978405948 | 0.995169397 | NA |
| ASV_16s_15064 | 0.228629289 | -0.68809976  | 3.550433384 | 0.886571945 | 0.99645685  | NA |
| ASV_16s_15065 | 0.215673785 | 1.346363607  | 3.550430769 | 0.355813689 | 0.999822109 | NA |
| ASV_16s_15066 | 0.190346608 | 0.202545328  | 3.551503613 | 0.653851125 | 0.998665743 | NA |
| ASV_16s_15067 | 0.212162581 | -0.48265632  | 3.550822297 | 0.966626228 | 0.995349086 | NA |
| ASV_16s_15068 | 0.196635687 | 0.437308155  | 3.550923494 | 0.938743332 | 0.995757106 | NA |
| ASV_16s_15069 | 0.234428568 | -0.691404905 | 3.550371159 | 0.925702154 | 0.99593971  | NA |
| ASV_16s_15070 | 0.207373567 | -0.927597833 | 3.550535624 | 0.534896973 | 0.999308405 | NA |
| ASV_16s_15071 | 0.214402067 | -0.638484128 | 3.550462895 | 0.908168991 | NA          | NA |
| ASV_16s_15072 | 0.201766817 | 0.133269104  | 3.550430788 | 0.655316904 | 0.998656001 | NA |
| ASV_16s_15073 | 0.228571272 | -0.636675915 | 3.550336829 | 0.988338594 | 0.995014464 | NA |
| ASV_16s_15074 | 0.230655454 | -0.628861084 | 3.550320003 | 1.006081058 | NA          | NA |
| ASV_16s_15075 | 0.270017206 | -1.218839915 | 3.550061046 | 0.487750599 | 0.999490109 | NA |
| ASV_16s_15076 | 0.214119649 | -0.538098244 | 3.55047829  | 0.998838864 | 0.994847245 | NA |
| ASV_16s_15077 | 0.226590159 | -0.582466636 | 3.550627803 | 0.851893122 | 0.996877598 | NA |
| ASV_16s_15078 | 0.241022843 | -0.561859206 | 3.550760997 | 0.697516386 | 0.998354747 | NA |
| ASV_16s_15079 | 0.210645326 | 0.608980092  | 3.550519168 | 0.521299    | 0.999364695 | NA |
| ASV_16s_15080 | 0.2418861   | -0.033776901 | 3.550616386 | 1.009626    | 0.994671758 | NA |
| ASV_16s_15081 | 0.188954446 | 0.677094283  | 3.551125577 | 0.892864955 | NA          | NA |
| ASV_16s_15082 | 0.188954446 | -0.098683706 | 3.550866546 | 0.948104713 | NA          | NA |
| ASV_16s_15083 | 0.253126273 | 1.082472609  | 3.550929709 | 0.851590662 | 0.996881116 | NA |

|               |             |              |             |             |             |    |
|---------------|-------------|--------------|-------------|-------------|-------------|----|
| ASV_16s_15084 | 0.223895    | -0.399251388 | 3.550591683 | 1.040595837 | NA          | NA |
| ASV_16s_15085 | 0.209827749 | -0.66302575  | 3.550586608 | 0.609205969 | NA          | NA |
| ASV_16s_15086 | 0.158950876 | 1.237341726  | 3.551389128 | 0.39939305  | 0.999737896 | NA |
| ASV_16s_15087 | 0.234146953 | 0.680390128  | 3.550941679 | 0.983680124 | 0.99508752  | NA |
| ASV_16s_15088 | 0.248832156 | 0.834711299  | 3.072887267 | 0.53123473  | 0.999323885 | NA |
| ASV_16s_15089 | 0.213774565 | -0.222178801 | 3.551384537 | 0.319433994 | 0.999876317 | NA |
| ASV_16s_15090 | 0.177649522 | -0.53922484  | 3.550824645 | 0.749500274 | NA          | NA |
| ASV_16s_15091 | 0.219617815 | -0.106763209 | 3.550947587 | 0.778714312 | 0.997655161 | NA |
| ASV_16s_15092 | 0.155630777 | -0.778364616 | 3.551150678 | 0.41782138  | NA          | NA |
| ASV_16s_15093 | 0.218605197 | 0.208295275  | 3.550253903 | 0.704281673 | 0.998302622 | NA |
| ASV_16s_15094 | 0.21399342  | -0.867109903 | 3.550803509 | 0.511716723 | NA          | NA |
| ASV_16s_15095 | 0.222976372 | 0.033730147  | 3.550986591 | 0.697862793 | NA          | NA |
| ASV_16s_15096 | 0.238987007 | 0.061940965  | 3.550303238 | 1.112525221 | NA          | NA |
| ASV_16s_15097 | 0.210400117 | -0.079205249 | 3.526351317 | 0.522216921 | 0.999360997 | NA |
| ASV_16s_15098 | 0.225089583 | 1.160415339  | 3.550876445 | 0.673704099 | NA          | NA |
| ASV_16s_15099 | 0.294689821 | 0.345254928  | 3.551584128 | 0.459219879 | NA          | NA |
| ASV_16s_15100 | 0.168656027 | 1.487371895  | 3.550936535 | 0.329932769 | 0.999862056 | NA |
| ASV_16s_15101 | 0.123924562 | 1.305239439  | 3.551364384 | 0.267007798 | 0.999932608 | NA |
| ASV_16s_15102 | 0.185928877 | 0.367094802  | 3.551601481 | 0.64643988  | NA          | NA |
| ASV_16s_15103 | 0.185928877 | 0.367094802  | 3.551601481 | 0.64643988  | NA          | NA |
| ASV_16s_15104 | 0.185928877 | 0.367094802  | 3.551601481 | 0.64643988  | NA          | NA |
| ASV_16s_15105 | 0.229143711 | -0.390340467 | 3.551237287 | 0.746243285 | NA          | NA |
| ASV_16s_15106 | 0.240453109 | 0.355117947  | 3.551921459 | 0.461345894 | NA          | NA |
| ASV_16s_15107 | 0.251520762 | 0.84279103   | 3.550907576 | 0.847092158 | 0.996933135 | NA |
| ASV_16s_15108 | 0.195092645 | 0.371259828  | 3.551543344 | 0.662539338 | NA          | NA |
| ASV_16s_15109 | 0.287001784 | -0.570692913 | 3.550537693 | 0.921523944 | NA          | NA |
| ASV_16s_15110 | 0.266080814 | 0.437491059  | 3.550300596 | 1.107453595 | 0.99290408  | NA |
| ASV_16s_15111 | 0.281124206 | -1.27824441  | 3.549901084 | 0.423297247 | NA          | NA |
| ASV_16s_15112 | 0.143898081 | -0.490573949 | 3.551176762 | 0.566347769 | NA          | NA |
| ASV_16s_15113 | 0.122042461 | -0.033164533 | 3.550805554 | 0.52141304  | 0.999364237 | NA |
| ASV_16s_15114 | 0.188353453 | -0.537742896 | 3.550742363 | 0.652555029 | NA          | NA |
| ASV_16s_15115 | 0.137993652 | 1.129046831  | 3.551081398 | 0.453503138 | NA          | NA |
| ASV_16s_15116 | 0.19425192  | 0.872471812  | 3.550658354 | 0.998904808 | 0.994846184 | NA |
| ASV_16s_15117 | 0.279879279 | -0.216009371 | 3.549786046 | 1.280250387 | 0.988960287 | NA |
| ASV_16s_15118 | 0.211653837 | -0.09699393  | 3.550148635 | 1.116886075 | 0.992716421 | NA |
| ASV_16s_15119 | 0.198737969 | 0.392574125  | 3.551145129 | 0.602409576 | NA          | NA |
| ASV_16s_15120 | 0.164055847 | 0.376365741  | 3.551367845 | 0.539576929 | NA          | NA |
| ASV_16s_15121 | 0.135292344 | -0.222365412 | 3.550841281 | 0.687693246 | NA          | NA |
| ASV_16s_15122 | 0.293392495 | -0.342697938 | 3.549739915 | 1.116016268 | 0.992733856 | NA |
| ASV_16s_15123 | 0.123606695 | -0.464121272 | 3.551036824 | 0.449454971 | NA          | NA |
| ASV_16s_15124 | 0.241249938 | -0.992158664 | 3.550137466 | 0.499536584 | 0.999448176 | NA |
| ASV_16s_15125 | 0.121117817 | -0.459068945 | 3.551059979 | 0.44630924  | NA          | NA |
| ASV_16s_15126 | 0.198737969 | -0.078708431 | 3.550789572 | 0.933698348 | NA          | NA |
| ASV_16s_15127 | 0.198737969 | -0.078708431 | 3.550789572 | 0.933698348 | NA          | NA |
| ASV_16s_15128 | 0.169466126 | -0.07854888  | 3.550836887 | 0.85616689  | NA          | NA |
| ASV_16s_15129 | 0.111064602 | 0.220129862  | 3.550837163 | 0.502601729 | NA          | NA |
| ASV_16s_15130 | 0.119972973 | 0.220115125  | 3.550817877 | 0.535944721 | 0.999303932 | NA |
| ASV_16s_15131 | 0.120254447 | 0.220114693  | 3.550817314 | 0.536972408 | 0.999299527 | NA |
| ASV_16s_15132 | 0.126161672 | 0.22010626   | 3.550806075 | 0.558186934 | NA          | NA |
| ASV_16s_15133 | 0.126161672 | 0.22010626   | 3.550806075 | 0.558186934 | NA          | NA |
| ASV_16s_15134 | 0.214642564 | 0.310940748  | 3.550892881 | 0.952552616 | NA          | NA |
| ASV_16s_15135 | 0.132901365 | 0.595929716  | 3.550756622 | 0.518913069 | NA          | NA |
| ASV_16s_15136 | 0.224572798 | 0.6879582    | 3.550850112 | 0.909037394 | NA          | NA |
| ASV_16s_15137 | 0.167646666 | 0.438632104  | 3.551289087 | 0.400547814 | NA          | NA |
| ASV_16s_15138 | 0.230898408 | 0.235648309  | 3.551049934 | 0.606878139 | NA          | NA |
| ASV_16s_15139 | 0.22015608  | 1.378958815  | 3.551001927 | 0.544925637 | NA          | NA |
| ASV_16s_15140 | 0.311730504 | -0.698945385 | 3.550193101 | 0.892844825 | 0.996377012 | NA |
| ASV_16s_15141 | 0.169068953 | 0.253229253  | 3.550804276 | 0.849933668 | 0.996900344 | NA |
| ASV_16s_15142 | 0.176403383 | -0.067807096 | 3.550741688 | 1.063530302 | NA          | NA |
| ASV_16s_15143 | 0.167782591 | 0.674654156  | 3.55167387  | 0.788983582 | 0.997554761 | NA |
| ASV_16s_15144 | 0.230532415 | 0.664697774  | 3.5501165   | 1.118850619 | NA          | NA |
| ASV_16s_15145 | 0.270076292 | -1.158523717 | 3.550511569 | 0.474598909 | 0.999534277 | NA |
| ASV_16s_15146 | 0.179872011 | -0.067982587 | 3.550649195 | 1.122363994 | 0.992606015 | NA |
| ASV_16s_15147 | 0.19074039  | -0.068229451 | 3.550576941 | 1.159486629 | 0.991829991 | NA |
| ASV_16s_15148 | 0.177581471 | 1.452653299  | 3.551234962 | 0.276935493 | 0.999923716 | NA |
| ASV_16s_15149 | 0.257846803 | 0.70580137   | 3.550417497 | 1.103787749 | 0.992976179 | NA |
| ASV_16s_15150 | 0.19067432  | -0.067929074 | 3.550560312 | 1.151751191 | NA          | NA |



|               |             |              |             |             |             |    |
|---------------|-------------|--------------|-------------|-------------|-------------|----|
| ASV_16s_15151 | 0.308422855 | 1.492852608  | 3.550658799 | 0.67714998  | 0.998505211 | NA |
| ASV_16s_15152 | 0.214450436 | 0.052794775  | 3.551121779 | 0.986846177 | NA          | NA |
| ASV_16s_15153 | 0.186313749 | -0.011795628 | 3.55101769  | 1.00027694  | NA          | NA |
| ASV_16s_15154 | 0.246168548 | 1.097926241  | 3.550900699 | 0.684572983 | NA          | NA |
| ASV_16s_15155 | 0.217251762 | 1.06676043   | 3.551022464 | 0.64207267  | NA          | NA |
| ASV_16s_15156 | 0.217251762 | 1.06676043   | 3.551022464 | 0.64207267  | NA          | NA |
| ASV_16s_15157 | 0.158352159 | 0.361614515  | 3.551500985 | 0.841058844 | NA          | NA |
| ASV_16s_15158 | 0.051260882 | 0.293376415  | 3.551903385 | 0.27891199  | NA          | NA |
| ASV_16s_15159 | 0.118967203 | 0.282828725  | 3.551698782 | 0.507277719 | NA          | NA |
| ASV_16s_15160 | 0.200962714 | 1.235366227  | 3.551299245 | 0.405247479 | NA          | NA |
| ASV_16s_15161 | 0.387081885 | -0.565159769 | 3.549729696 | 0.884074612 | NA          | NA |
| ASV_16s_15162 | 0.274961642 | 0.35058777   | 3.551370775 | 0.524421631 | 0.999352055 | NA |
| ASV_16s_15163 | 0.214491298 | 0.319461102  | 3.551013821 | 0.753281277 | 0.99789202  | NA |
| ASV_16s_15164 | 0.225089583 | -0.544985835 | 3.55015589  | 0.640402968 | NA          | NA |
| ASV_16s_15165 | 0.249581803 | 1.288536227  | 3.550593598 | 0.654444058 | NA          | NA |
| ASV_16s_15166 | 0.197786902 | 0.736934442  | 3.550226998 | 0.818228044 | 0.99725345  | NA |
| ASV_16s_15167 | 0.262016695 | 1.244648987  | 3.550211501 | 0.443890152 | NA          | NA |
| ASV_16s_15168 | 0.16014201  | 0.233410095  | 3.550866667 | 1.218367345 | 0.990497826 | NA |
| ASV_16s_15169 | 0.278460105 | 0.558795232  | 3.550896076 | 1.492865    | NA          | NA |
| ASV_16s_15170 | 0.265595061 | 0.355280678  | 3.550292633 | 1.326159971 | 0.987726366 | NA |
| ASV_16s_15171 | 0.187639151 | -0.028685864 | 3.550951707 | 0.964674526 | NA          | NA |
| ASV_16s_15172 | 0.191867272 | 0.331332496  | 3.550531697 | 1.133942364 | NA          | NA |
| ASV_16s_15173 | 0.203926888 | 0.278485917  | 3.550616217 | 1.117569381 | 0.992702707 | NA |
| ASV_16s_15174 | 0.163880777 | -0.07339914  | 3.550880897 | 0.864225607 | 0.996731937 | NA |
| ASV_16s_15175 | 0.156590276 | -0.073399162 | 3.550897885 | 0.842616649 | NA          | NA |
| ASV_16s_15176 | 0.171295272 | -0.073454945 | 3.550865098 | 0.885203214 | 0.996474117 | NA |
| ASV_16s_15177 | 0.15377661  | -0.073314493 | 3.550904875 | 0.834063112 | NA          | NA |
| ASV_16s_15178 | 0.213537894 | 0.346771941  | 3.550441075 | 1.195217383 | NA          | NA |
| ASV_16s_15179 | 0.190799985 | -0.073581487 | 3.550829305 | 0.937905686 | NA          | NA |
| ASV_16s_15180 | 0.190799985 | -0.073581487 | 3.550829305 | 0.937905686 | NA          | NA |
| ASV_16s_15181 | 0.214044197 | 0.360329817  | 3.55106808  | 1.012905224 | NA          | NA |
| ASV_16s_15182 | 0.214044197 | 0.360329817  | 3.55106808  | 1.012905224 | NA          | NA |
| ASV_16s_15183 | 0.207484385 | 0.355420915  | 3.551354455 | 0.735147826 | NA          | NA |
| ASV_16s_15184 | 0.208586307 | 0.339132872  | 3.551111923 | 0.748008302 | 0.99793906  | NA |
| ASV_16s_15185 | 0.278567301 | 0.636883473  | 3.550583503 | 1.029818094 | NA          | NA |
| ASV_16s_15186 | 0.237410306 | 0.334248775  | 3.550988602 | 0.835316338 | 0.997066612 | NA |
| ASV_16s_15187 | 0.250801242 | 0.670615912  | 3.550977621 | 1.350737241 | NA          | NA |
| ASV_16s_15188 | 0.190277896 | 0.360311835  | 3.551126867 | 0.954670266 | NA          | NA |
| ASV_16s_15189 | 0.190277896 | 0.360311835  | 3.551126867 | 0.954670266 | NA          | NA |
| ASV_16s_15190 | 0.190277896 | 0.360311835  | 3.551126867 | 0.954670266 | NA          | NA |
| ASV_16s_15191 | 0.190277896 | 0.360311835  | 3.551126867 | 0.954670266 | NA          | NA |
| ASV_16s_15192 | 0.246542039 | 0.315939636  | 3.550878419 | 1.044825937 | NA          | NA |
| ASV_16s_15193 | 0.237436501 | 0.315939545  | 3.550889536 | 1.025892036 | 0.994399978 | NA |
| ASV_16s_15194 | 0.244928148 | 0.315939535  | 3.550880343 | 1.041441765 | 0.994132036 | NA |
| ASV_16s_15195 | 0.216725832 | 0.315939577  | 3.550918279 | 0.980170467 | 0.995142103 | NA |
| ASV_16s_15196 | 0.21559502  | 0.315939579  | 3.550920005 | 0.977565487 | 0.995182363 | NA |
| ASV_16s_15197 | 0.214568433 | 0.31593958   | 3.550921589 | 0.975183584 | 0.995218987 | NA |
| ASV_16s_15198 | 0.211496052 | 0.315939586  | 3.55092642  | 0.967997785 | 0.995328389 | NA |
| ASV_16s_15199 | 0.205581881 | 0.315939717  | 3.550936123 | 0.953921946 | 0.99553799  | NA |
| ASV_16s_15200 | 0.2332362   | 0.548200803  | 3.550856707 | 1.501832577 | 0.982246148 | NA |
| ASV_16s_15201 | 0.226298095 | 0.315939561  | 3.550904369 | 1.001317078 | 0.994807262 | NA |
| ASV_16s_15202 | 0.233339509 | 0.315939551  | 3.550894851 | 1.016722818 | 0.994554244 | NA |
| ASV_16s_15203 | 0.198737969 | 0.315939734  | 3.550948069 | 0.937172976 | NA          | NA |
| ASV_16s_15204 | 0.198737969 | 0.315939734  | 3.550948069 | 0.937172976 | NA          | NA |
| ASV_16s_15205 | 0.198737969 | 0.315939734  | 3.550948069 | 0.937172976 | NA          | NA |
| ASV_16s_15206 | 0.310686106 | 0.734413316  | 3.550922084 | 1.137161339 | NA          | NA |
| ASV_16s_15207 | 0.275419772 | 0.734260945  | 3.550966205 | 1.076358471 | 0.993500963 | NA |
| ASV_16s_15208 | 0.262905911 | 0.734197195  | 3.55098468  | 1.052997582 | NA          | NA |
| ASV_16s_15209 | 0.262905911 | 0.734197195  | 3.55098468  | 1.052997582 | NA          | NA |
| ASV_16s_15210 | 0.262905911 | 0.734197195  | 3.55098468  | 1.052997582 | NA          | NA |
| ASV_16s_15211 | 0.262905911 | 0.734197195  | 3.55098468  | 1.052997582 | NA          | NA |
| ASV_16s_15212 | 0.262905911 | 0.734197195  | 3.55098468  | 1.052997582 | NA          | NA |
| ASV_16s_15213 | 0.262905911 | 0.734197195  | 3.55098468  | 1.052997582 | NA          | NA |
| ASV_16s_15214 | 0.262905911 | 0.734197195  | 3.55098468  | 1.052997582 | NA          | NA |
| ASV_16s_15215 | 0.262905911 | 0.734197195  | 3.55098468  | 1.052997582 | NA          | NA |
| ASV_16s_15216 | 0.130231932 | 0.729218277  | 3.55138729  | 0.717926556 | NA          | NA |
| ASV_16s_15217 | 0.24441732  | 0.693141847  | 3.550855594 | 0.975805573 | NA          | NA |

|               |             |              |             |             |             |    |
|---------------|-------------|--------------|-------------|-------------|-------------|----|
| ASV_16s_15218 | 0.24441732  | 0.693141847  | 3.550855594 | 0.975805573 | NA          | NA |
| ASV_16s_15219 | 0.247884923 | 0.693156266  | 3.550851371 | 0.982847014 | 0.995100512 | NA |
| ASV_16s_15220 | 0.248875666 | 0.693160313  | 3.550850186 | 0.984843164 | 0.995069345 | NA |
| ASV_16s_15221 | 0.23381434  | 0.693095111  | 3.550869286 | 0.953688059 | 0.99554142  | NA |
| ASV_16s_15222 | 0.198737969 | 0.692905539  | 3.550924895 | 0.873643539 | NA          | NA |
| ASV_16s_15223 | 0.198737969 | 0.692905539  | 3.550924895 | 0.873643539 | NA          | NA |
| ASV_16s_15224 | 0.254225237 | 0.693181566  | 3.550843964 | 0.995419668 | 0.994902086 | NA |
| ASV_16s_15225 | 0.167264485 | 0.291459705  | 3.551715849 | 0.610573012 | NA          | NA |
| ASV_16s_15226 | 0.167264485 | 0.291459705  | 3.551715849 | 0.610573012 | NA          | NA |
| ASV_16s_15227 | 0.167264485 | 0.291459705  | 3.551715849 | 0.610573012 | NA          | NA |
| ASV_16s_15228 | 0.170371511 | -0.049170307 | 3.551083371 | 0.968032652 | 0.995327862 | NA |
| ASV_16s_15229 | 0.170371511 | -0.049170307 | 3.551083371 | 0.968032652 | 0.995327862 | NA |
| ASV_16s_15230 | 0.170630429 | -0.06920916  | 3.551052616 | 0.9852389   | 0.995063152 | NA |
| ASV_16s_15231 | 0.170889348 | -0.088744576 | 3.551024881 | 1.000757662 | 0.994816305 | NA |
| ASV_16s_15232 | 0.169876489 | -0.085201379 | 3.551037657 | 0.99618582  | 0.99488983  | NA |
| ASV_16s_15233 | 0.167350046 | -0.094878596 | 3.551046405 | 0.998114298 | 0.994858898 | NA |
| ASV_16s_15234 | 0.171407186 | -0.126311622 | 3.550977003 | 1.026473021 | 0.994390111 | NA |
| ASV_16s_15235 | 0.171407186 | -0.126311622 | 3.550977003 | 1.026473021 | 0.994390111 | NA |
| ASV_16s_15236 | 0.171666105 | -0.144511331 | 3.550956461 | 1.036918806 | 0.994210798 | NA |
| ASV_16s_15237 | 0.169133957 | -0.136775301 | 3.550984474 | 1.026848953 | 0.99438372  | NA |
| ASV_16s_15238 | 0.171666105 | -0.144511331 | 3.550956461 | 1.036918806 | 0.994210798 | NA |
| ASV_16s_15239 | 0.167367158 | -0.148935987 | 3.550987081 | 1.028821453 | 0.994350111 | NA |
| ASV_16s_15240 | 0.178383186 | -0.179154158 | 3.550867185 | 1.070897595 | 0.993602373 | NA |
| ASV_16s_15241 | 0.181270783 | -0.186272005 | 3.550837684 | 1.082206537 | 0.993391238 | NA |
| ASV_16s_15242 | 0.167367158 | -0.148935987 | 3.550987081 | 1.028821453 | 0.994350111 | NA |
| ASV_16s_15243 | 0.167372862 | -0.166411981 | 3.550971264 | 1.036465431 | 0.994218655 | NA |
| ASV_16s_15244 | 0.174539551 | -0.18588005  | 3.550895047 | 1.062264213 | 0.993760637 | NA |
| ASV_16s_15245 | 0.172442861 | -0.19725535  | 3.550905371 | 1.058808474 | 0.993823281 | NA |
| ASV_16s_15246 | 0.180710494 | -0.248530619 | 3.550806602 | 1.082522896 | 0.993385269 | NA |
| ASV_16s_15247 | 0.167395678 | -0.23498722  | 3.550925344 | 1.032153013 | 0.994293054 | NA |
| ASV_16s_15248 | 0.171959248 | -0.26263744  | 3.55087685  | 1.041183493 | 0.994136552 | NA |
| ASV_16s_15249 | 0.173737456 | -0.28335942  | 3.5508543   | 1.037191112 | 0.994206075 | NA |
| ASV_16s_15250 | 0.173737456 | -0.28335942  | 3.5508543   | 1.037191112 | 0.994206075 | NA |
| ASV_16s_15251 | 0.167407086 | -0.269154215 | 3.550911242 | 1.014061053 | 0.994598512 | NA |
| ASV_16s_15252 | 0.167407086 | -0.269154215 | 3.550911242 | 1.014061053 | 0.994598512 | NA |
| ASV_16s_15253 | 0.181310711 | -0.298146679 | 3.550785741 | 1.056423886 | 0.993866274 | NA |
| ASV_16s_15254 | 0.18440611  | -0.320184398 | 3.550756876 | 1.054017617 | 0.993909464 | NA |
| ASV_16s_15255 | 0.173996374 | -0.300892506 | 3.550847666 | 1.026008974 | 0.994397993 | NA |
| ASV_16s_15256 | 0.198321143 | -0.373931928 | 3.550646868 | 1.066503957 | 0.99368323  | NA |
| ASV_16s_15257 | 0.212230472 | -0.405408556 | 3.550543227 | 1.086448328 | NA          | NA |
| ASV_16s_15258 | 0.169455621 | -0.343736774 | 3.550878442 | 0.96632174  | 0.995353673 | NA |
| ASV_16s_15259 | 0.190306126 | -0.396493552 | 3.55071627  | 1.009111395 | 0.994680215 | NA |
| ASV_16s_15260 | 0.167435606 | -0.357650999 | 3.550894936 | 0.942358544 | NA          | NA |
| ASV_16s_15261 | 0.172246687 | -0.366882729 | 3.550855752 | 0.957210672 | 0.995489573 | NA |
| ASV_16s_15262 | 0.17503205  | -0.372068858 | 3.550834014 | 0.965611944 | NA          | NA |
| ASV_16s_15263 | 0.167441311 | -0.3758041   | 3.550895625 | 0.923193202 | NA          | NA |
| ASV_16s_15264 | 0.252517398 | -0.672499256 | 3.550477349 | 0.768529117 | 0.997752017 | NA |
| ASV_16s_15265 | 0.228201482 | -0.657654845 | 3.550607248 | 0.734673555 | NA          | NA |
| ASV_16s_15266 | 0.217073988 | -0.648628344 | 3.55066782  | 0.71793443  | 0.99819411  | NA |
| ASV_16s_15267 | 0.209192013 | -0.641519832 | 3.550713218 | 0.705513433 | NA          | NA |
| ASV_16s_15268 | 0.209192013 | -0.641519832 | 3.550713218 | 0.705513433 | NA          | NA |
| ASV_16s_15269 | 0.177880157 | -0.600443844 | 3.550890472 | 0.650174465 | NA          | NA |
| ASV_16s_15270 | 0.175935612 | -0.59727339  | 3.550901891 | 0.646350413 | 0.998714858 | NA |
| ASV_16s_15271 | 0.167498351 | -0.582321133 | 3.550949139 | 0.629567223 | NA          | NA |
| ASV_16s_15272 | 0.167498351 | -0.582321133 | 3.550949139 | 0.629567223 | NA          | NA |
| ASV_16s_15273 | 0.167498351 | -0.582321133 | 3.550949139 | 0.629567223 | NA          | NA |
| ASV_16s_15274 | 0.167498351 | -0.582321133 | 3.550949139 | 0.629567223 | NA          | NA |
| ASV_16s_15275 | 0.167498351 | -0.582321133 | 3.550949139 | 0.629567223 | NA          | NA |
| ASV_16s_15276 | 0.053366046 | -0.168364656 | 3.55100246  | 0.257737251 | NA          | NA |
| ASV_16s_15277 | 0.053230162 | 0.056594582  | 3.551002766 | 0.386556972 | 0.999765053 | NA |
| ASV_16s_15278 | 0.108420207 | 0.220134684  | 3.550843507 | 0.4923362   | NA          | NA |
| ASV_16s_15279 | 0.195905617 | 0.096243203  | 3.550825132 | 1.020167563 | 0.994496612 | NA |
| ASV_16s_15280 | 0.182149383 | -0.240646601 | 3.550630373 | 0.709492217 | 0.998261735 | NA |
| ASV_16s_15281 | 0.213900726 | -0.670731923 | 3.5505724   | 0.822331289 | 0.99720932  | NA |
| ASV_16s_15282 | 0.215866369 | -0.667312968 | 3.550519374 | 0.849892437 | 0.996900821 | NA |
| ASV_16s_15283 | 0.1724987   | -0.20359809  | 3.550700032 | 0.71417518  | NA          | NA |
| ASV_16s_15284 | 0.219027114 | -0.292394049 | 3.550339782 | 0.859494418 | NA          | NA |

|               |             |              |             |             |             |    |
|---------------|-------------|--------------|-------------|-------------|-------------|----|
| ASV_16s_15285 | 0.226152787 | -0.680137825 | 3.550431416 | 0.890133119 | 0.996411667 | NA |
| ASV_16s_15286 | 0.225349177 | -0.67139561  | 3.550414392 | 0.910512454 | 0.99614589  | NA |
| ASV_16s_15287 | 0.181617743 | 0.957601468  | 3.551453499 | 0.599341961 | NA          | NA |
| ASV_16s_15288 | 0.220840189 | -0.650400614 | 3.550420609 | 0.923959734 | 0.995963715 | NA |
| ASV_16s_15289 | 0.225094636 | -0.321678653 | 3.550691697 | 1.003694868 | 0.994768713 | NA |
| ASV_16s_15290 | 0.217123677 | -0.633447845 | 3.550432761 | 0.93114462  | 0.995864136 | NA |
| ASV_16s_15291 | 0.201648209 | -0.603959044 | 3.55054905  | 0.889379967 | 0.996421254 | NA |
| ASV_16s_15292 | 0.218962529 | -0.624311357 | 3.55040641  | 0.952773782 | 0.995554814 | NA |
| ASV_16s_15293 | 0.19906152  | -0.544031594 | 3.551163667 | 0.739882015 | NA          | NA |
| ASV_16s_15294 | 0.197743882 | 0.682293068  | 3.55121987  | 0.895845891 | NA          | NA |
| ASV_16s_15295 | 0.154547645 | -0.272985547 | 3.550194481 | 0.784396868 | 0.997599947 | NA |
| ASV_16s_15296 | 0.224200291 | -0.616217643 | 3.550364041 | 0.986212094 | 0.995047898 | NA |
| ASV_16s_15297 | 0.219232119 | -0.599303273 | 3.550400187 | 0.977617549 | 0.995181561 | NA |
| ASV_16s_15298 | 0.22987887  | -0.076189786 | 3.550533075 | 1.073426261 | NA          | NA |
| ASV_16s_15299 | 0.225859911 | -0.599085449 | 3.550359074 | 1.007390352 | NA          | NA |
| ASV_16s_15300 | 0.219691718 | -0.586541493 | 3.550403128 | 0.989651607 | 0.994993747 | NA |
| ASV_16s_15301 | 0.193059206 | -0.458425362 | 3.551390294 | 0.739810411 | 0.998010804 | NA |
| ASV_16s_15302 | 0.234892974 | -0.511117571 | 3.550456725 | 1.099998182 | NA          | NA |
| ASV_16s_15303 | 0.207408506 | -0.159859264 | 3.550698645 | 0.929834292 | 0.995882414 | NA |
| ASV_16s_15304 | 0.175251383 | 0.31762204   | 3.552012862 | 0.396385861 | 0.999744442 | NA |
| ASV_16s_15305 | 0.221875179 | 0.183208776  | 3.549742342 | 1.02377455  | NA          | NA |
| ASV_16s_15306 | 0.2307653   | -0.3874651   | 3.550323932 | 0.866179045 | 0.996708466 | NA |
| ASV_16s_15307 | 0.227702307 | -0.483910661 | 3.550734675 | 0.789403483 | 0.997550596 | NA |
| ASV_16s_15308 | 0.210725982 | 0.468712963  | 3.550767234 | 0.590552047 | 0.999042762 | NA |
| ASV_16s_15309 | 0.215802443 | -0.203324736 | 3.551365242 | 0.508497621 | 0.999414768 | NA |
| ASV_16s_15310 | 0.217715192 | -0.150599676 | 3.551125841 | 0.783234315 | 0.997611311 | NA |
| ASV_16s_15311 | 0.214903168 | -0.160874872 | 3.55082945  | 1.000109159 | 0.994826775 | NA |
| ASV_16s_15312 | 0.228572062 | 0.210377885  | 3.550778543 | 0.972018025 | 0.995267383 | NA |
| ASV_16s_15313 | 0.214795058 | -0.110768708 | 3.550816152 | 0.968280099 | 0.995324122 | NA |
| ASV_16s_15314 | 0.214097729 | -0.060872194 | 3.550996831 | 1.023609378 | NA          | NA |
| ASV_16s_15315 | 0.186361065 | -0.006747523 | 3.550650193 | 0.882236686 | 0.996511352 | NA |
| ASV_16s_15316 | 0.195243917 | 0.049792029  | 3.550884294 | 0.892320234 | 0.996383733 | NA |
| ASV_16s_15317 | 0.276810625 | -0.042997661 | 3.550752702 | 1.009707614 | 0.994670415 | NA |
| ASV_16s_15318 | 0.198565023 | 0.51085015   | 3.550864183 | 1.257615718 | 0.989539249 | NA |
| ASV_16s_15319 | 0.219730307 | 1.155429135  | 3.550909281 | 0.665278725 | NA          | NA |
| ASV_16s_15320 | 0.242130837 | 0.234863028  | 3.549962429 | 0.924238649 | 0.995959879 | NA |
| ASV_16s_15321 | 0.22661426  | 0.790009137  | 3.55032164  | 0.805823625 | 0.997384066 | NA |
| ASV_16s_15322 | 0.216995388 | 0.327114097  | 3.551936101 | 0.464823263 | 0.999565363 | NA |
| ASV_16s_15323 | 0.18543708  | 1.189986313  | 3.551071722 | 0.611681727 | NA          | NA |
| ASV_16s_15324 | 0.205056012 | 0.575662648  | 3.550517049 | 1.033454852 | 0.99427066  | NA |
| ASV_16s_15325 | 0.208658522 | 1.226118713  | 3.550968642 | 0.652946091 | NA          | NA |
| ASV_16s_15326 | 0.232046406 | 1.254285681  | 3.550864506 | 0.69003756  | 0.998411118 | NA |
| ASV_16s_15327 | 0.243031141 | 0.385368705  | 3.551255583 | 0.736538424 | NA          | NA |
| ASV_16s_15328 | 0.204622694 | 0.348553106  | 3.551985055 | 0.397074086 | 0.999742954 | NA |
| ASV_16s_15329 | 0.140653208 | 0.347127047  | 3.551846882 | 0.5537604   | NA          | NA |
| ASV_16s_15330 | 0.140653208 | 0.347127047  | 3.551846882 | 0.5537604   | NA          | NA |
| ASV_16s_15331 | 0.190447582 | 0.369330421  | 3.551574021 | 0.654448728 | NA          | NA |
| ASV_16s_15332 | 0.252232179 | 0.107438873  | 3.551911676 | 0.478100684 | NA          | NA |
| ASV_16s_15333 | 0.186342446 | 1.219212504  | 3.550847696 | 0.553651236 | NA          | NA |
| ASV_16s_15334 | 0.235541704 | 0.407530538  | 3.550936415 | 0.658913285 | NA          | NA |
| ASV_16s_15335 | 0.200735353 | 0.739337431  | 3.550684721 | 0.992342821 | 0.994951113 | NA |
| ASV_16s_15336 | 0.160149755 | 0.374614826  | 3.551388731 | 0.53163379  | NA          | NA |
| ASV_16s_15337 | 0.16668188  | 0.553488484  | 3.551065804 | 0.709264244 | NA          | NA |
| ASV_16s_15338 | 0.222245282 | -0.155606365 | 3.55005842  | 1.16441378  | 0.991723314 | NA |
| ASV_16s_15339 | 0.173276358 | 0.379842834  | 3.551316844 | 0.557533259 | NA          | NA |
| ASV_16s_15340 | 0.060333351 | 0.342147566  | 3.551825057 | 0.261024903 | NA          | NA |
| ASV_16s_15341 | 0.205976076 | -0.073487305 | 3.55074373  | 0.906174465 | NA          | NA |
| ASV_16s_15342 | 0.097353884 | -0.403705651 | 3.551269543 | 0.383360591 | NA          | NA |
| ASV_16s_15343 | 0.097353884 | -0.403705651 | 3.551269543 | 0.383360591 | NA          | NA |
| ASV_16s_15344 | 0.14835455  | -0.246252097 | 3.550630485 | 0.549377086 | NA          | NA |
| ASV_16s_15345 | 0.118234059 | -0.452882536 | 3.551088738 | 0.439060109 | NA          | NA |
| ASV_16s_15346 | 0.118234059 | -0.452882536 | 3.551088738 | 0.439060109 | NA          | NA |
| ASV_16s_15347 | 0.108358971 | -0.430894893 | 3.551178361 | 0.413426636 | NA          | NA |
| ASV_16s_15348 | 0.108358971 | -0.430894893 | 3.551178361 | 0.413426636 | NA          | NA |
| ASV_16s_15349 | 0.108358971 | -0.430894893 | 3.551178361 | 0.413426636 | NA          | NA |
| ASV_16s_15350 | 0.194006112 | -0.078686006 | 3.55079627  | 0.921814889 | NA          | NA |
| ASV_16s_15351 | 0.165431219 | -0.078522658 | 3.55084473  | 0.844542527 | NA          | NA |

|               |             |              |             |             |             |    |
|---------------|-------------|--------------|-------------|-------------|-------------|----|
| ASV_16s_15352 | 0.165431219 | -0.078522658 | 3.55084473  | 0.844542527 | NA          | NA |
| ASV_16s_15353 | 0.165431219 | -0.078522658 | 3.55084473  | 0.844542527 | NA          | NA |
| ASV_16s_15354 | 0.165431219 | -0.078522658 | 3.55084473  | 0.844542527 | NA          | NA |
| ASV_16s_15355 | 0.170606637 | -0.078554052 | 3.550834757 | 0.859332974 | 0.996790244 | NA |
| ASV_16s_15356 | 0.115842774 | 0.220121655  | 3.550826463 | 0.520627205 | 0.999367393 | NA |
| ASV_16s_15357 | 0.116549685 | 0.220120509  | 3.550824953 | 0.523260821 | 0.999356774 | NA |
| ASV_16s_15358 | 0.134641362 | 0.223119114  | 3.550983945 | 0.380377021 | 0.999777409 | NA |
| ASV_16s_15359 | 0.120929117 | 0.220113693  | 3.550815986 | 0.539384618 | 0.999289111 | NA |
| ASV_16s_15360 | 0.123157823 | 0.220110442  | 3.550811666 | 0.547445616 | NA          | NA |
| ASV_16s_15361 | 0.122989865 | 0.220110669  | 3.550811986 | 0.546842117 | 0.999256248 | NA |
| ASV_16s_15362 | 0.18328255  | 0.310944128  | 3.550944814 | 0.874555082 | NA          | NA |
| ASV_16s_15363 | 0.188784511 | -0.068143365 | 3.550756407 | 1.034303116 | 0.994256037 | NA |
| ASV_16s_15364 | 0.189952264 | -0.068163187 | 3.550705251 | 1.100676315 | 0.993037008 | NA |
| ASV_16s_15365 | 0.171872957 | -0.067953867 | 3.55077123  | 1.03485618  | NA          | NA |
| ASV_16s_15366 | 0.171872957 | -0.067953867 | 3.55077123  | 1.03485618  | NA          | NA |
| ASV_16s_15367 | 0.138559361 | -0.319426521 | 3.551148548 | 0.71825861  | NA          | NA |
| ASV_16s_15368 | 0.176332622 | -0.067840432 | 3.550677483 | 1.097608638 | NA          | NA |
| ASV_16s_15369 | 0.177819177 | -0.067343492 | 3.550705161 | 1.083817731 | NA          | NA |
| ASV_16s_15370 | 0.185060169 | -0.293922732 | 3.551090559 | 0.971385566 | NA          | NA |
| ASV_16s_15371 | 0.156491873 | 0.723687344  | 3.551619449 | 0.786919668 | NA          | NA |
| ASV_16s_15372 | 0.154571189 | 0.747867396  | 3.551417111 | 0.724239668 | NA          | NA |
| ASV_16s_15373 | 0.213811488 | 0.337536277  | 3.551426669 | 0.565182772 | 0.999171084 | NA |
| ASV_16s_15374 | 0.159696201 | -0.481555529 | 3.550746061 | 0.621717029 | 0.998867617 | NA |
| ASV_16s_15375 | 0.185945682 | -0.041677666 | 3.55089116  | 1.021229818 | NA          | NA |
| ASV_16s_15376 | 0.15773937  | -0.385111623 | 3.550971228 | 0.618346139 | NA          | NA |
| ASV_16s_15377 | 0.157915295 | 0.700757848  | 3.551564348 | 0.782368253 | NA          | NA |
| ASV_16s_15378 | 0.225150769 | 1.413816521  | 3.551034556 | 0.418864804 | NA          | NA |
| ASV_16s_15379 | 0.212079101 | 1.060488286  | 3.551047002 | 0.633690118 | NA          | NA |
| ASV_16s_15380 | 0.223910041 | 0.324476202  | 3.551516858 | 0.656418878 | 0.998648645 | NA |
| ASV_16s_15381 | 0.050040385 | 0.293731033  | 3.551906155 | 0.273609193 | NA          | NA |
| ASV_16s_15382 | 0.050040385 | 0.293731033  | 3.551906155 | 0.273609193 | NA          | NA |
| ASV_16s_15383 | 0.233599617 | 0.279721396  | 3.551473039 | 0.744849639 | NA          | NA |
| ASV_16s_15384 | 0.162718485 | 0.691015857  | 3.55134521  | 0.585689096 | NA          | NA |
| ASV_16s_15385 | 0.37786565  | -0.565057757 | 3.54975519  | 0.876284497 | NA          | NA |
| ASV_16s_15386 | 0.300994809 | -0.044381373 | 3.550236464 | 1.300978567 | NA          | NA |
| ASV_16s_15387 | 0.287998887 | 0.486793288  | 3.550474472 | 0.953564347 | 0.995543234 | NA |
| ASV_16s_15388 | 0.32036402  | -0.498190752 | 3.550057381 | 0.901340111 | 0.996267037 | NA |
| ASV_16s_15389 | 0.307325763 | 0.381432974  | 3.550823802 | 1.923284414 | 0.963964015 | NA |
| ASV_16s_15390 | 0.312882566 | 0.199629649  | 3.549801733 | 1.332341996 | 0.987554051 | NA |
| ASV_16s_15391 | 0.311674428 | 0.337673528  | 3.549932007 | 1.551356811 | 0.980478239 | NA |
| ASV_16s_15392 | 0.183171553 | -0.028654458 | 3.550962205 | 0.952860009 | NA          | NA |
| ASV_16s_15393 | 0.183171553 | -0.028654458 | 3.550962205 | 0.952860009 | NA          | NA |
| ASV_16s_15394 | 0.20929681  | -0.073679997 | 3.550801531 | 0.983361816 | NA          | NA |
| ASV_16s_15395 | 0.233548961 | 0.337347025  | 3.550272841 | 1.277478299 | 0.98903223  | NA |
| ASV_16s_15396 | 0.152861936 | -0.07330645  | 3.55090722  | 0.831201363 | NA          | NA |
| ASV_16s_15397 | 0.152861936 | -0.07330645  | 3.55090722  | 0.831201363 | NA          | NA |
| ASV_16s_15398 | 0.152125024 | -0.073299763 | 3.550909116 | 0.828931759 | 0.997137362 | NA |
| ASV_16s_15399 | 0.190432006 | 0.288637259  | 3.550310696 | 1.017498775 | NA          | NA |
| ASV_16s_15400 | 0.228064763 | 0.381301059  | 3.550718516 | 1.128659352 | NA          | NA |
| ASV_16s_15401 | 0.208947906 | 0.360326307  | 3.55107959  | 1.00084245  | NA          | NA |
| ASV_16s_15402 | 0.208947906 | 0.360326307  | 3.55107959  | 1.00084245  | NA          | NA |
| ASV_16s_15403 | 0.208947906 | 0.360326307  | 3.55107959  | 1.00084245  | NA          | NA |
| ASV_16s_15404 | 0.24461146  | 0.7558246    | 3.550644413 | 1.251301432 | 0.989697331 | NA |
| ASV_16s_15405 | 0.18574747  | 0.360307898  | 3.55113979  | 0.942799657 | NA          | NA |
| ASV_16s_15406 | 0.18574747  | 0.360307898  | 3.55113979  | 0.942799657 | NA          | NA |
| ASV_16s_15407 | 0.18574747  | 0.360307898  | 3.55113979  | 0.942799657 | NA          | NA |
| ASV_16s_15408 | 0.18574747  | 0.360307898  | 3.55113979  | 0.942799657 | NA          | NA |
| ASV_16s_15409 | 0.18574747  | 0.360307898  | 3.55113979  | 0.942799657 | NA          | NA |
| ASV_16s_15410 | 0.18574747  | 0.360307898  | 3.55113979  | 0.942799657 | NA          | NA |
| ASV_16s_15411 | 0.18574747  | 0.360307898  | 3.55113979  | 0.942799657 | NA          | NA |
| ASV_16s_15412 | 0.18574747  | 0.360307898  | 3.55113979  | 0.942799657 | NA          | NA |
| ASV_16s_15413 | 0.24067199  | 0.315939654  | 3.550885503 | 1.032646613 | NA          | NA |
| ASV_16s_15414 | 0.214493571 | 0.315939603  | 3.550921723 | 0.974940679 | 0.995222712 | NA |
| ASV_16s_15415 | 0.211197979 | 0.315939609  | 3.550926914 | 0.96722915  | 0.995339995 | NA |
| ASV_16s_15416 | 0.202218807 | 0.315939627  | 3.550941908 | 0.945693733 | 0.995657655 | NA |
| ASV_16s_15417 | 0.20119222  | 0.315939629  | 3.550943708 | 0.943174992 | 0.995693867 | NA |
| ASV_16s_15418 | 0.209944613 | 0.315939612  | 3.55092894  | 0.963886752 | 0.995390247 | NA |

|               |             |              |             |             |             |    |
|---------------|-------------|--------------|-------------|-------------|-------------|----|
| ASV_16s_15419 | 0.233056196 | 0.315939573  | 3.550895234 | 1.016059037 | 0.994565305 | NA |
| ASV_16s_15420 | 0.194006112 | 0.315939757  | 3.550956836 | 0.925241554 | NA          | NA |
| ASV_16s_15421 | 0.194006112 | 0.315939757  | 3.550956836 | 0.925241554 | NA          | NA |
| ASV_16s_15422 | 0.194006112 | 0.315939757  | 3.550956836 | 0.925241554 | NA          | NA |
| ASV_16s_15423 | 0.194006112 | 0.315939757  | 3.550956836 | 0.925241554 | NA          | NA |
| ASV_16s_15424 | 0.194006112 | 0.371279157  | 3.550934497 | 1.164346851 | NA          | NA |
| ASV_16s_15425 | 0.184759205 | 0.687759681  | 3.550913503 | 0.813707999 | NA          | NA |
| ASV_16s_15426 | 0.288244449 | 1.094384953  | 3.550610975 | 0.832579377 | 0.99709708  | NA |
| ASV_16s_15427 | 0.256646247 | 0.734163072  | 3.550994615 | 1.040842614 | NA          | NA |
| ASV_16s_15428 | 0.256646247 | 0.734163072  | 3.550994615 | 1.040842614 | NA          | NA |
| ASV_16s_15429 | 0.256646247 | 0.734163072  | 3.550994615 | 1.040842614 | NA          | NA |
| ASV_16s_15430 | 0.127131172 | 0.728021251  | 3.551402819 | 0.707323352 | NA          | NA |
| ASV_16s_15431 | 0.127131172 | 0.728021251  | 3.551402819 | 0.707323352 | NA          | NA |
| ASV_16s_15432 | 0.243056206 | 0.693136194  | 3.550857298 | 0.972960242 | 0.995253011 | NA |
| ASV_16s_15433 | 0.245367941 | 0.693145958  | 3.550854438 | 0.977685545 | NA          | NA |
| ASV_16s_15434 | 0.194006112 | 0.692874913  | 3.550933944 | 0.861876716 | NA          | NA |
| ASV_16s_15435 | 0.224902884 | 0.69305255   | 3.550881812 | 0.934270315 | 0.995820324 | NA |
| ASV_16s_15436 | 0.227109796 | 0.693063414  | 3.550878626 | 0.939113382 | 0.995751849 | NA |
| ASV_16s_15437 | 0.284489515 | 0.693287386  | 3.550813058 | 1.051960656 | NA          | NA |
| ASV_16s_15438 | 0.280126051 | 1.391323508  | 3.550546996 | 0.598079025 | NA          | NA |
| ASV_16s_15439 | 0.163184863 | 0.291855548  | 3.551734177 | 0.602229328 | NA          | NA |
| ASV_16s_15440 | 0.163184863 | 0.291855548  | 3.551734177 | 0.602229328 | NA          | NA |
| ASV_16s_15441 | 0.163184863 | 0.291855548  | 3.551734177 | 0.602229328 | NA          | NA |
| ASV_16s_15442 | 0.163184863 | 0.291855548  | 3.551734177 | 0.602229328 | NA          | NA |
| ASV_16s_15443 | 0.164738376 | 0.088782884  | 3.551375299 | 0.814319091 | NA          | NA |
| ASV_16s_15444 | 0.178185057 | -0.001486262 | 3.55109668  | 0.920367726 | NA          | NA |
| ASV_16s_15445 | 0.175589273 | -0.010765734 | 3.551101551 | 0.927623197 | NA          | NA |
| ASV_16s_15446 | 0.184613712 | -0.080575519 | 3.550922111 | 1.017851015 | 0.994535412 | NA |
| ASV_16s_15447 | 0.167068646 | -0.112204329 | 3.551028241 | 0.999472562 | 0.99483704  | NA |
| ASV_16s_15448 | 0.169461221 | -0.155127564 | 3.550964361 | 1.028198862 | 0.994360733 | NA |
| ASV_16s_15449 | 0.167845402 | -0.167727615 | 3.550966394 | 1.029297437 | 0.994341982 | NA |
| ASV_16s_15450 | 0.167845402 | -0.167727615 | 3.550966394 | 1.029297437 | 0.994341982 | NA |
| ASV_16s_15451 | 0.166326113 | -0.163293515 | 3.550982825 | 1.023558672 | 0.994439497 | NA |
| ASV_16s_15452 | 0.181292083 | -0.218024979 | 3.550816783 | 1.083607051 | 0.993364788 | NA |
| ASV_16s_15453 | 0.168104321 | -0.185662374 | 3.550949913 | 1.035153549 | 0.994241353 | NA |
| ASV_16s_15454 | 0.166090011 | -0.214538745 | 3.550947364 | 1.028203143 | 0.99436066  | NA |
| ASV_16s_15455 | 0.168622159 | -0.221069497 | 3.550922604 | 1.03630003  | 0.99422152  | NA |
| ASV_16s_15456 | 0.163304648 | -0.207157135 | 3.550975656 | 1.019414461 | 0.994509245 | NA |
| ASV_16s_15457 | 0.169139996 | -0.256071269 | 3.550902092 | 1.030359316 | 0.994323819 | NA |
| ASV_16s_15458 | 0.172534023 | -0.263863115 | 3.550871911 | 1.038289968 | 0.994186992 | NA |
| ASV_16s_15459 | 0.163344577 | -0.3311631   | 3.550931072 | 0.946197796 | 0.995650385 | NA |
| ASV_16s_15460 | 0.166895288 | -0.356559726 | 3.550899612 | 0.940571728 | 0.995731088 | NA |
| ASV_16s_15461 | 0.163350281 | -0.349399965 | 3.550929797 | 0.929278338 | NA          | NA |
| ASV_16s_15462 | 0.167913851 | -0.376678098 | 3.550891923 | 0.924534523 | 0.995955807 | NA |
| ASV_16s_15463 | 0.174884147 | -0.407554925 | 3.550840389 | 0.922460452 | 0.995984297 | NA |
| ASV_16s_15464 | 0.058336624 | -0.233500606 | 3.551763599 | 0.319600425 | NA          | NA |
| ASV_16s_15465 | 0.058336624 | -0.233500606 | 3.551763599 | 0.319600425 | NA          | NA |
| ASV_16s_15466 | 0.058336624 | -0.233500606 | 3.551763599 | 0.319600425 | NA          | NA |
| ASV_16s_15467 | 0.058336624 | -0.233500606 | 3.551763599 | 0.319600425 | NA          | NA |
| ASV_16s_15468 | 0.058336624 | -0.233500606 | 3.551763599 | 0.319600425 | NA          | NA |
| ASV_16s_15469 | 0.242662107 | -0.666988252 | 3.550528822 | 0.755148909 | 0.997875191 | NA |
| ASV_16s_15470 | 0.222635592 | -0.653178079 | 3.550637001 | 0.726344895 | NA          | NA |
| ASV_16s_15471 | 0.211743057 | -0.643859216 | 3.550698403 | 0.709530416 | 0.998261433 | NA |
| ASV_16s_15472 | 0.204089769 | -0.636689308 | 3.550744224 | 0.697180057 | NA          | NA |
| ASV_16s_15473 | 0.202034207 | -0.634700085 | 3.550757159 | 0.693750464 | 0.998383296 | NA |
| ASV_16s_15474 | 0.170756254 | -0.588208602 | 3.55093079  | 0.636109142 | NA          | NA |
| ASV_16s_15475 | 0.168224106 | -0.583618108 | 3.550945078 | 0.630995192 | 0.998811598 | NA |
| ASV_16s_15476 | 0.168224106 | -0.583618108 | 3.550945078 | 0.630995192 | 0.998811598 | NA |
| ASV_16s_15477 | 0.163413026 | -0.574714661 | 3.550973181 | 0.621107157 | NA          | NA |
| ASV_16s_15478 | 0.163413026 | -0.574714661 | 3.550973181 | 0.621107157 | NA          | NA |
| ASV_16s_15479 | 0.163413026 | -0.574714661 | 3.550973181 | 0.621107157 | NA          | NA |
| ASV_16s_15480 | 0.163413026 | -0.574714661 | 3.550973181 | 0.621107157 | NA          | NA |
| ASV_16s_15481 | 0.163413026 | -0.574714661 | 3.550973181 | 0.621107157 | NA          | NA |
| ASV_16s_15482 | 0.163413026 | -0.574714661 | 3.550973181 | 0.621107157 | NA          | NA |
| ASV_16s_15483 | 0.052064435 | -0.167207886 | 3.551010586 | 0.250235393 | NA          | NA |
| ASV_16s_15484 | 0.046181536 | -0.161588794 | 3.551052608 | 0.215615813 | NA          | NA |
| ASV_16s_15485 | 0.046181536 | -0.161588794 | 3.551052608 | 0.215615813 | NA          | NA |

|               |             |              |             |             |             |    |
|---------------|-------------|--------------|-------------|-------------|-------------|----|
| ASV_16s_15486 | 0.072579621 | 0.220234025  | 3.550974538 | 0.33625507  | NA          | NA |
| ASV_16s_15490 | 0.188781923 | 0.110120009  | 3.551059678 | 1.048888046 | 0.994000887 | NA |
| ASV_16s_15491 | 0.1922855   | -0.459897199 | 3.550965844 | 0.906737178 | 0.996196058 | NA |
| ASV_16s_15492 | 0.236624066 | -0.678522794 | 3.550588577 | 0.778610852 | 0.997656158 | NA |
| ASV_16s_15493 | 0.216060435 | -0.64924188  | 3.550730104 | 0.722056034 | 0.998160469 | NA |
| ASV_16s_15494 | 0.177934405 | -0.789932745 | 3.550884466 | 0.458561082 | 0.999584513 | NA |
| ASV_16s_15495 | 0.169282264 | 0.142277933  | 3.551043328 | 0.86448931  | 0.996728775 | NA |
| ASV_16s_15496 | 0.220964718 | -0.685312471 | 3.550598927 | 0.778682869 | 0.997655464 | NA |
| ASV_16s_15497 | 0.16691327  | -0.253597238 | 3.550836309 | 0.648659505 | NA          | NA |
| ASV_16s_15498 | 0.171401996 | 0.052561091  | 3.550859272 | 0.933610684 | 0.995829594 | NA |
| ASV_16s_15499 | 0.221904455 | -0.686739667 | 3.550551484 | 0.812600845 | 0.997313221 | NA |
| ASV_16s_15500 | 0.20157847  | -0.872108613 | 3.550614717 | 0.545947874 | 0.999260242 | NA |
| ASV_16s_15501 | 0.178965387 | 0.269195858  | 3.550880415 | 0.977618625 | 0.995181544 | NA |
| ASV_16s_15502 | 0.180030859 | 0.041879614  | 3.550635508 | 0.950376274 | 0.995589813 | NA |
| ASV_16s_15503 | 0.196842155 | -0.212604531 | 3.550446627 | 0.797748159 | 0.997466866 | NA |
| ASV_16s_15504 | 0.178112391 | 0.308020891  | 3.550944886 | 0.721539805 | 0.998164705 | NA |
| ASV_16s_15505 | 0.188539189 | 0.118974543  | 3.550953986 | 0.673415254 | NA          | NA |
| ASV_16s_15506 | 0.219142726 | -0.595302457 | 3.550687134 | 0.97192226  | 0.995268842 | NA |
| ASV_16s_15507 | 0.180391246 | 0.135153359  | 3.55068445  | 0.601338376 | 0.998984376 | NA |
| ASV_16s_15508 | 0.18092776  | 0.676895101  | 3.551325462 | 0.791848639 | NA          | NA |
| ASV_16s_15509 | 0.198749409 | 0.958299975  | 3.551522256 | 0.744876732 | NA          | NA |
| ASV_16s_15510 | 0.147523082 | 0.623557012  | 3.551761958 | 0.743058295 | NA          | NA |
| ASV_16s_15511 | 0.210856296 | -0.603327959 | 3.55046381  | 0.933489206 | NA          | NA |
| ASV_16s_15512 | 0.201992956 | -0.583895863 | 3.550533752 | 0.910228711 | 0.996149675 | NA |
| ASV_16s_15513 | 0.219788671 | -0.614439396 | 3.550395791 | 0.963188786 | NA          | NA |
| ASV_16s_15514 | 0.204222457 | -0.571763883 | 3.550514801 | 0.92846006  | NA          | NA |
| ASV_16s_15515 | 0.188066763 | -0.698608434 | 3.55028271  | 0.697034628 | 0.998358418 | NA |
| ASV_16s_15516 | 0.218899552 | -0.599052966 | 3.550402725 | 0.973444755 | NA          | NA |
| ASV_16s_15517 | 0.250372723 | -1.081142017 | 3.550380678 | 0.525571723 | 0.999347356 | NA |
| ASV_16s_15518 | 0.226625385 | -0.203742582 | 3.550180428 | 0.957436144 | 0.995486241 | NA |
| ASV_16s_15519 | 0.202534644 | -0.637639905 | 3.550588516 | 0.882637755 | 0.996506333 | NA |
| ASV_16s_15520 | 0.227829387 | 0.372468276  | 3.550286901 | 1.197705862 | 0.990979624 | NA |
| ASV_16s_15521 | 0.196361578 | -0.04903872  | 3.550612459 | 0.931864811 | 0.995854067 | NA |
| ASV_16s_15522 | 0.205175883 | -0.103335021 | 3.550887359 | 1.026560233 | 0.994388629 | NA |
| ASV_16s_15523 | 0.237833599 | 1.41677916   | 3.550195762 | 0.398180904 | 0.999740549 | NA |
| ASV_16s_15524 | 0.218094632 | -0.300386925 | 3.551382511 | 0.703889251 | 0.998305675 | NA |
| ASV_16s_15525 | 0.198358968 | 1.081921923  | 3.551348975 | 0.705735808 | NA          | NA |
| ASV_16s_15526 | 0.215452756 | -0.502880376 | 3.550508488 | 1.005917262 | 0.994732517 | NA |
| ASV_16s_15527 | 0.19018713  | -0.461624097 | 3.550656684 | 0.924254951 | NA          | NA |
| ASV_16s_15528 | 0.204653738 | -0.439960992 | 3.550605863 | 0.976136976 | NA          | NA |
| ASV_16s_15529 | 0.216062519 | 1.098340797  | 3.551133116 | 0.731523266 | 0.998081629 | NA |
| ASV_16s_15530 | 0.231980805 | -0.508779227 | 3.550444238 | 1.07145398  | NA          | NA |
| ASV_16s_15531 | 0.195245999 | -0.425175339 | 3.550656842 | 0.94393701  | NA          | NA |
| ASV_16s_15532 | 0.205262166 | -0.479683611 | 3.551071207 | 0.448884694 | 0.999612958 | NA |
| ASV_16s_15533 | 0.220575794 | -0.344170057 | 3.550695083 | 1.022046661 | 0.99446501  | NA |
| ASV_16s_15534 | 0.218398072 | -0.344305372 | 3.55076085  | 0.827997415 | 0.997147621 | NA |
| ASV_16s_15535 | 0.189716718 | -0.285324982 | 3.550778462 | 0.909524632 | 0.996159058 | NA |
| ASV_16s_15536 | 0.207307181 | 0.183217919  | 3.549795103 | 0.92459973  | NA          | NA |
| ASV_16s_15537 | 0.179002666 | -0.238517643 | 3.550959122 | 0.806519481 | 0.997376849 | NA |
| ASV_16s_15538 | 0.238443808 | 1.297643626  | 3.550853843 | 0.598378824 | 0.999000628 | NA |
| ASV_16s_15539 | 0.210038031 | 0.681022764  | 3.550984523 | 0.909372138 | 0.996161088 | NA |
| ASV_16s_15540 | 0.120616804 | 1.247807604  | 3.551461762 | 0.250133549 | NA          | NA |
| ASV_16s_15541 | 0.259274705 | 0.567995922  | 3.550516432 | 1.203789828 | NA          | NA |
| ASV_16s_15542 | 0.225438333 | 0.054786365  | 3.55085729  | 0.994872308 | 0.99491083  | NA |
| ASV_16s_15543 | 0.175395397 | -0.069619868 | 3.550887473 | 0.911423752 | NA          | NA |
| ASV_16s_15544 | 0.239538951 | 0.846565578  | 3.550638194 | 1.220594212 | 0.990444964 | NA |
| ASV_16s_15545 | 0.186774564 | 1.192218616  | 3.551065526 | 0.614131759 | NA          | NA |
| ASV_16s_15546 | 0.177075121 | 0.362607044  | 3.551655279 | 0.630007075 | NA          | NA |
| ASV_16s_15547 | 0.177075121 | 0.362607044  | 3.551655279 | 0.630007075 | NA          | NA |
| ASV_16s_15548 | 0.189629566 | 0.350791725  | 3.551966774 | 0.367991789 | 0.99980081  | NA |
| ASV_16s_15549 | 0.239925304 | 0.354745003  | 3.55175468  | 0.418586703 | 0.999693376 | NA |
| ASV_16s_15550 | 0.214122574 | 0.352190126  | 3.551933425 | 0.389270278 | 0.999759482 | NA |
| ASV_16s_15551 | 0.183203838 | 0.363582118  | 3.551585174 | 0.427953116 | NA          | NA |
| ASV_16s_15552 | 0.137222642 | 0.345916466  | 3.551860064 | 0.545642508 | NA          | NA |
| ASV_16s_15553 | 0.145030384 | 0.337058405  | 3.552005569 | 0.38832143  | NA          | NA |
| ASV_16s_15554 | 0.173136355 | -0.421318252 | 3.551318464 | 0.602544607 | NA          | NA |
| ASV_16s_15555 | 0.172046219 | 0.484135603  | 3.550860208 | 0.901659614 | 0.99626286  | NA |

|               |             |              |             |              |             |    |
|---------------|-------------|--------------|-------------|--------------|-------------|----|
| ASV_16s_15556 | 0.198131826 | -0.543978389 | 3.550661094 | 0.668708264  | 0.998564785 | NA |
| ASV_16s_15557 | 0.137045792 | -0.478059761 | 3.551232147 | 0.550799029  | NA          | NA |
| ASV_16s_15558 | 0.192105368 | -18.5717247  | 3.551624149 | -0.625298598 | 1           | NA |
| ASV_16s_15559 | 0.201607008 | -0.546174387 | 3.550633253 | 0.674486442  | NA          | NA |
| ASV_16s_15560 | 0.195440632 | -1.01750483  | 3.550646939 | 0.355695497  | 0.999822308 | NA |
| ASV_16s_15561 | 0.179952161 | -0.881558778 | 3.55087928  | 0.416624935  | NA          | NA |
| ASV_16s_15562 | 0.134560484 | -0.777134006 | 3.551130743 | 0.288425653  | NA          | NA |
| ASV_16s_15563 | 0.106044429 | 1.042311587  | 3.551280574 | 0.373142545  | NA          | NA |
| ASV_16s_15564 | 0.106044429 | 1.042311587  | 3.551280574 | 0.373142545  | NA          | NA |
| ASV_16s_15565 | 0.106044429 | 1.042311587  | 3.551280574 | 0.373142545  | NA          | NA |
| ASV_16s_15566 | 0.106044429 | 1.042311587  | 3.551280574 | 0.373142545  | NA          | NA |
| ASV_16s_15567 | 0.192271302 | -0.072274723 | 3.550832195 | 0.856627122  | NA          | NA |
| ASV_16s_15568 | 0.282653371 | 0.418528572  | 3.550695915 | 0.719382535  | NA          | NA |
| ASV_16s_15569 | 0.219623566 | 1.067028794  | 3.550563206 | 0.889850238  | NA          | NA |
| ASV_16s_15570 | 0.235338827 | 0.02016379   | 3.550114201 | 1.165804747  | 0.991693041 | NA |
| ASV_16s_15571 | 0.156243664 | 0.372822315  | 3.55141048  | 0.523556896  | NA          | NA |
| ASV_16s_15572 | 0.156243664 | 0.372822315  | 3.55141048  | 0.523556896  | NA          | NA |
| ASV_16s_15573 | 0.177713549 | -0.072314257 | 3.550747497 | 0.848388308  | NA          | NA |
| ASV_16s_15574 | 0.232161412 | 0.868729724  | 3.550430976 | 1.137137614  | 0.992303014 | NA |
| ASV_16s_15575 | 0.094979399 | -0.396699874 | 3.551286879 | 0.376534028  | NA          | NA |
| ASV_16s_15576 | 0.112007588 | -0.002621639 | 3.551025685 | 0.565644387  | NA          | NA |
| ASV_16s_15577 | 0.115350302 | -0.446631554 | 3.551115925 | 0.431681261  | NA          | NA |
| ASV_16s_15578 | 0.115350302 | -0.446631554 | 3.551115925 | 0.431681261  | NA          | NA |
| ASV_16s_15579 | 0.105716069 | -0.424724221 | 3.551202502 | 0.406320079  | NA          | NA |
| ASV_16s_15580 | 0.189274256 | -0.078662457 | 3.550803303 | 0.909674489  | NA          | NA |
| ASV_16s_15581 | 0.189274256 | -0.078662457 | 3.550803303 | 0.909674489  | NA          | NA |
| ASV_16s_15582 | 0.173244437 | -0.078570919 | 3.550829919 | 0.866659567  | 0.996702675 | NA |
| ASV_16s_15583 | 0.112605438 | 0.220127116  | 3.550833635 | 0.508381547  | 0.999415209 | NA |
| ASV_16s_15584 | 0.114708176 | 0.220123551  | 3.550828939 | 0.516331942  | 0.999384456 | NA |
| ASV_16s_15585 | 0.120153973 | 0.220114914  | 3.550817536 | 0.53651616   | NA          | NA |
| ASV_16s_15586 | 0.123409849 | 0.407308205  | 3.550777961 | 0.857292738  | 0.996814356 | NA |
| ASV_16s_15587 | 0.126572729 | 0.595903552  | 3.550766942 | 0.497635388  | NA          | NA |
| ASV_16s_15588 | 0.12200183  | 0.215309669  | 3.550907493 | 0.339430865  | 0.999848207 | NA |
| ASV_16s_15589 | 0.168829086 | -0.067463748 | 3.550772816 | 1.043062524  | NA          | NA |
| ASV_16s_15590 | 0.169324604 | -0.067586696 | 3.550769386 | 1.053251434  | NA          | NA |
| ASV_16s_15591 | 0.177605274 | -0.06773517  | 3.550725529 | 1.085747229  | 0.993324238 | NA |
| ASV_16s_15592 | 0.113243382 | 0.308907078  | 3.551987176 | 0.329787142  | 0.999862261 | NA |
| ASV_16s_15593 | 0.197860614 | -0.350387202 | 3.550742337 | 0.86001881   | 0.996782112 | NA |
| ASV_16s_15594 | 0.174704163 | 0.566812158  | 3.550662196 | 0.63203703   | 0.998805194 | NA |
| ASV_16s_15595 | 0.171306677 | -0.06791511  | 3.550723316 | 1.07578643   | 0.993511634 | NA |
| ASV_16s_15596 | 0.181657515 | -0.068122505 | 3.550647567 | 1.112592642  | 0.992802223 | NA |
| ASV_16s_15597 | 0.138526375 | 0.716666959  | 3.551530878 | 0.687944811  | 0.998426658 | NA |
| ASV_16s_15598 | 0.225941652 | 0.334858348  | 3.550302552 | 1.189012192  | NA          | NA |
| ASV_16s_15599 | 0.184238498 | -0.067596547 | 3.550630355 | 1.101905385  | NA          | NA |
| ASV_16s_15600 | 0.170294812 | 0.909268099  | 3.551380197 | 0.503768623  | NA          | NA |
| ASV_16s_15601 | 0.259801889 | 1.128024377  | 3.551010496 | 0.806762328  | NA          | NA |
| ASV_16s_15602 | 0.182627056 | -0.012606693 | 3.551031869 | 0.976037245  | NA          | NA |
| ASV_16s_15603 | 0.231406566 | 0.193452865  | 3.550469671 | 1.096903295  | NA          | NA |
| ASV_16s_15604 | 0.20206176  | 1.04793463   | 3.551097483 | 0.616998243  | NA          | NA |
| ASV_16s_15605 | 0.27760337  | 0.27957758   | 3.551382976 | 0.807701947  | NA          | NA |
| ASV_16s_15606 | 0.080800854 | 0.286515285  | 3.551807353 | 0.391570629  | NA          | NA |
| ASV_16s_15607 | 0.080800854 | 0.286515285  | 3.551807353 | 0.391570629  | NA          | NA |
| ASV_16s_15608 | 0.159138992 | -0.474091846 | 3.551303476 | 0.599777191  | NA          | NA |
| ASV_16s_15609 | 0.135447472 | -0.078278291 | 3.550917439 | 0.750883334  | NA          | NA |
| ASV_16s_15610 | 0.135447472 | -0.078278291 | 3.550917439 | 0.750883334  | NA          | NA |
| ASV_16s_15611 | 0.135447472 | -0.078278291 | 3.550917439 | 0.750883334  | NA          | NA |
| ASV_16s_15612 | 0.135447472 | -0.078278291 | 3.550917439 | 0.750883334  | NA          | NA |
| ASV_16s_15613 | 0.147558498 | -0.103441724 | 3.550865992 | 0.856943617  | NA          | NA |
| ASV_16s_15614 | 0.374820129 | -0.02933595  | 3.550736401 | 1.311508262  | NA          | NA |
| ASV_16s_15615 | 0.269571894 | 0.836357751  | 3.550458793 | 1.349094348  | 0.987079692 | NA |
| ASV_16s_15616 | 0.205730156 | 0.408482364  | 3.55074689  | 1.019799922  | NA          | NA |
| ASV_16s_15617 | 0.236528211 | 0.356077315  | 3.550419775 | 1.199933592  | NA          | NA |
| ASV_16s_15618 | 0.254850874 | 0.48107268   | 3.550953524 | 1.085560609  | 0.99332778  | NA |
| ASV_16s_15619 | 0.149133596 | -0.073272096 | 3.55091702  | 0.819574794  | NA          | NA |
| ASV_16s_15620 | 0.199760089 | 0.339873196  | 3.55048486  | 1.150955498  | 0.992012648 | NA |
| ASV_16s_15621 | 0.146453915 | -0.073246227 | 3.550924355 | 0.811119661  | NA          | NA |
| ASV_16s_15622 | 0.146453915 | -0.073246227 | 3.550924355 | 0.811119661  | NA          | NA |

|               |             |              |             |             |             |    |
|---------------|-------------|--------------|-------------|-------------|-------------|----|
| ASV_16s_15623 | 0.146453915 | -0.073246227 | 3.550924355 | 0.811119661 | NA          | NA |
| ASV_16s_15624 | 0.198420248 | 0.340469342  | 3.550496499 | 1.144303928 | 0.992153267 | NA |
| ASV_16s_15625 | 0.202892454 | 0.312124545  | 3.550529939 | 1.142209983 | 0.99219721  | NA |
| ASV_16s_15626 | 0.220436735 | 0.301488555  | 3.550504954 | 1.191829063 | 0.991113816 | NA |
| ASV_16s_15627 | 0.181714272 | -0.073526226 | 3.550845045 | 0.913985298 | NA          | NA |
| ASV_16s_15628 | 0.219484043 | 0.339860443  | 3.550367212 | 1.209024083 | NA          | NA |
| ASV_16s_15629 | 0.211197607 | 0.345368874  | 3.551156876 | 0.735743008 | 0.998045778 | NA |
| ASV_16s_15630 | 0.197962577 | 0.332220121  | 3.551057399 | 0.774866969 | 0.997692064 | NA |
| ASV_16s_15631 | 0.230159393 | 0.332218256  | 3.55097594  | 0.846004508 | NA          | NA |
| ASV_16s_15632 | 0.215034235 | 0.320427747  | 3.550987261 | 0.827637914 | 0.997151562 | NA |
| ASV_16s_15633 | 0.181217044 | 0.360303765  | 3.551153355 | 0.930669498 | NA          | NA |
| ASV_16s_15634 | 0.181217044 | 0.360303765  | 3.551153355 | 0.930669498 | NA          | NA |
| ASV_16s_15635 | 0.181217044 | 0.360303765  | 3.551153355 | 0.930669498 | NA          | NA |
| ASV_16s_15636 | 0.181217044 | 0.360303765  | 3.551153355 | 0.930669498 | NA          | NA |
| ASV_16s_15637 | 0.181217044 | 0.360303765  | 3.551153355 | 0.930669498 | NA          | NA |
| ASV_16s_15638 | 0.181217044 | 0.360303765  | 3.551153355 | 0.930669498 | NA          | NA |
| ASV_16s_15639 | 0.234801941 | 0.315939672  | 3.550892939 | 1.020183423 | NA          | NA |
| ASV_16s_15640 | 0.202939941 | 0.315939647  | 3.550940676 | 0.947377958 | 0.995633332 | NA |
| ASV_16s_15641 | 0.202962081 | 0.315939742  | 3.550940634 | 0.94745178  | NA          | NA |
| ASV_16s_15642 | 0.202962081 | 0.315939742  | 3.550940634 | 0.94745178  | NA          | NA |
| ASV_16s_15643 | 0.202962081 | 0.315939742  | 3.550940634 | 0.94745178  | NA          | NA |
| ASV_16s_15644 | 0.196460364 | 0.315939661  | 3.550952262 | 0.931367755 | 0.995861018 | NA |
| ASV_16s_15645 | 0.195433777 | 0.315939664  | 3.550954169 | 0.928786621 | 0.99589699  | NA |
| ASV_16s_15646 | 0.194064995 | 0.315939667  | 3.550956742 | 0.925327591 | 0.995944878 | NA |
| ASV_16s_15647 | 0.193380603 | 0.315939669  | 3.550958042 | 0.923589919 | 0.995968798 | NA |
| ASV_16s_15648 | 0.201856634 | 0.485538885  | 3.550904473 | 1.423929438 | 0.984827029 | NA |
| ASV_16s_15649 | 0.189274256 | 0.315939781  | 3.55096604  | 0.913055141 | NA          | NA |
| ASV_16s_15650 | 0.189274256 | 0.315939781  | 3.55096604  | 0.913055141 | NA          | NA |
| ASV_16s_15651 | 0.189274256 | 0.315939781  | 3.55096604  | 0.913055141 | NA          | NA |
| ASV_16s_15652 | 0.25484853  | 0.596184504  | 3.550657872 | 0.828541515 | NA          | NA |
| ASV_16s_15653 | 0.180252883 | 0.687731851  | 3.550922447 | 0.801839597 | NA          | NA |
| ASV_16s_15654 | 0.295538297 | 1.111206392  | 3.550526197 | 0.810695065 | NA          | NA |
| ASV_16s_15655 | 0.260625195 | 0.734185045  | 3.550988281 | 1.048487215 | 0.994007993 | NA |
| ASV_16s_15656 | 0.250386582 | 0.734127244  | 3.551005043 | 1.028399145 | NA          | NA |
| ASV_16s_15657 | 0.250386582 | 0.734127244  | 3.551005043 | 1.028399145 | NA          | NA |
| ASV_16s_15658 | 0.250386582 | 0.734127244  | 3.551005043 | 1.028399145 | NA          | NA |
| ASV_16s_15659 | 0.124030412 | 0.726412987  | 3.551417345 | 0.696567378 | NA          | NA |
| ASV_16s_15660 | 0.236741374 | 0.693106973  | 3.550865408 | 0.959783683 | 0.995451457 | NA |
| ASV_16s_15661 | 0.20558831  | 0.6929478    | 3.550912591 | 0.890044707 | 0.996412793 | NA |
| ASV_16s_15662 | 0.214852774 | 0.692998512  | 3.550897141 | 0.911682824 | 0.996130251 | NA |
| ASV_16s_15663 | 0.250093362 | 0.69316386   | 3.550848778 | 0.987129123 | 0.995033498 | NA |
| ASV_16s_15664 | 0.239383358 | 0.693120406  | 3.55086197  | 0.965310213 | NA          | NA |
| ASV_16s_15665 | 0.239383358 | 0.693120406  | 3.55086197  | 0.965310213 | NA          | NA |
| ASV_16s_15666 | 0.250984516 | 0.693167464  | 3.550847725 | 0.988934954 | 0.995005061 | NA |
| ASV_16s_15667 | 0.189274256 | 0.692842747  | 3.550943444 | 0.849888522 | NA          | NA |
| ASV_16s_15668 | 0.189274256 | 0.692842747  | 3.550943444 | 0.849888522 | NA          | NA |
| ASV_16s_15669 | 0.189274256 | 0.692842747  | 3.550943444 | 0.849888522 | NA          | NA |
| ASV_16s_15670 | 0.159105241 | 0.291796768  | 3.551749774 | 0.593650335 | NA          | NA |
| ASV_16s_15671 | 0.159105241 | 0.291796768  | 3.551749774 | 0.593650335 | NA          | NA |
| ASV_16s_15672 | 0.159105241 | 0.291796768  | 3.551749774 | 0.593650335 | NA          | NA |
| ASV_16s_15673 | 0.159105241 | 0.291796768  | 3.551749774 | 0.593650335 | NA          | NA |
| ASV_16s_15674 | 0.159105241 | 0.291796768  | 3.551749774 | 0.593650335 | NA          | NA |
| ASV_16s_15675 | 0.161953349 | -0.035291097 | 3.551178274 | 0.922570644 | 0.995982787 | NA |
| ASV_16s_15676 | 0.161953349 | -0.035291097 | 3.551178274 | 0.922570644 | 0.995982787 | NA |
| ASV_16s_15677 | 0.160692979 | -0.050558328 | 3.551166078 | 0.93338113  | 0.995832817 | NA |
| ASV_16s_15678 | 0.169962062 | -0.085289647 | 3.551037215 | 0.978652258 | 0.995165593 | NA |
| ASV_16s_15679 | 0.162989024 | -0.116875573 | 3.551058071 | 0.984061646 | 0.995081563 | NA |
| ASV_16s_15680 | 0.163247943 | -0.136024369 | 3.551035164 | 0.994920288 | 0.994910064 | NA |
| ASV_16s_15681 | 0.163247943 | -0.136024369 | 3.551035164 | 0.994920288 | 0.994910064 | NA |
| ASV_16s_15682 | 0.163247943 | -0.136024369 | 3.551035164 | 0.994920288 | 0.994910064 | NA |
| ASV_16s_15683 | 0.163247943 | -0.136024369 | 3.551035164 | 0.994920288 | 0.994910064 | NA |
| ASV_16s_15684 | 0.163247943 | -0.136024369 | 3.551035164 | 0.994920288 | 0.994910064 | NA |
| ASV_16s_15685 | 0.163506862 | -0.154818851 | 3.551014622 | 1.004163057 | 0.994761101 | NA |
| ASV_16s_15686 | 0.163506862 | -0.154818851 | 3.551014622 | 1.004163057 | 0.994761101 | NA |
| ASV_16s_15687 | 0.163506862 | -0.154818851 | 3.551014622 | 1.004163057 | 0.994761101 | NA |
| ASV_16s_15688 | 0.163765781 | -0.173319562 | 3.550996274 | 1.010830421 | 0.99465193  | NA |
| ASV_16s_15689 | 0.163765781 | -0.173319562 | 3.550996274 | 1.010830421 | 0.99465193  | NA |



|               |             |              |             |             |             |    |
|---------------|-------------|--------------|-------------|-------------|-------------|----|
| ASV_16s_15690 | 0.159207915 | -0.159749666 | 3.551048276 | 0.993874817 | 0.99492674  | NA |
| ASV_16s_15691 | 0.160727203 | -0.16434724  | 3.551030512 | 0.999482115 | 0.994836886 | NA |
| ASV_16s_15692 | 0.163765781 | -0.173319562 | 3.550996274 | 1.010830421 | 0.99465193  | NA |
| ASV_16s_15693 | 0.159213619 | -0.177874988 | 3.551032874 | 0.996055895 | 0.99489191  | NA |
| ASV_16s_15694 | 0.164283618 | -0.20972724  | 3.55096577  | 1.013641917 | 0.994605461 | NA |
| ASV_16s_15695 | 0.164542537 | -0.227723392 | 3.55095337  | 1.012480937 | 0.994624681 | NA |
| ASV_16s_15696 | 0.162263604 | -0.221841816 | 3.550976296 | 1.005253757 | 0.99474334  | NA |
| ASV_16s_15697 | 0.164542537 | -0.227723392 | 3.55095337  | 1.012480937 | 0.994624681 | NA |
| ASV_16s_15698 | 0.177458862 | -0.257678819 | 3.550830875 | 1.05470008  | 0.993897234 | NA |
| ASV_16s_15699 | 0.174101802 | -0.284003153 | 3.550851289 | 1.031197443 | 0.994309457 | NA |
| ASV_16s_15700 | 0.168686555 | -0.272008636 | 3.550899907 | 1.013145296 | 0.994613688 | NA |
| ASV_16s_15701 | 0.162528227 | -0.257499504 | 3.550957961 | 0.994715178 | 0.994913338 | NA |
| ASV_16s_15702 | 0.17104337  | -0.294475709 | 3.550873205 | 1.0096881   | 0.994670736 | NA |
| ASV_16s_15703 | 0.160761428 | -0.271121508 | 3.550968356 | 0.977973708 | 0.995176068 | NA |
| ASV_16s_15704 | 0.165837131 | -0.318407028 | 3.550911604 | 0.969990581 | 0.995298213 | NA |
| ASV_16s_15705 | 0.159276363 | -0.378586919 | 3.550967158 | 0.877777205 | NA          | NA |
| ASV_16s_15706 | 0.162073134 | -0.422755521 | 3.55095073  | 0.840535718 | 0.99700793  | NA |
| ASV_16s_15707 | 0.056878208 | -0.225955712 | 3.551771205 | 0.313746347 | NA          | NA |
| ASV_16s_15708 | 0.056878208 | -0.225955712 | 3.551771205 | 0.313746347 | NA          | NA |
| ASV_16s_15709 | 0.056878208 | -0.225955712 | 3.551771205 | 0.313746347 | NA          | NA |
| ASV_16s_15710 | 0.056878208 | -0.225955712 | 3.551771205 | 0.313746347 | NA          | NA |
| ASV_16s_15711 | 0.056878208 | -0.225955712 | 3.551771205 | 0.313746347 | NA          | NA |
| ASV_16s_15712 | 0.229029864 | -0.658264738 | 3.55060323  | 0.735777009 | 0.998045487 | NA |
| ASV_16s_15713 | 0.189453414 | -0.618387913 | 3.550826887 | 0.671760406 | 0.998543432 | NA |
| ASV_16s_15714 | 0.219576742 | -0.650661331 | 3.550653977 | 0.721666178 | NA          | NA |
| ASV_16s_15715 | 0.169203076 | -0.585368873 | 3.550939611 | 0.632930814 | NA          | NA |
| ASV_16s_15716 | 0.169203076 | -0.585368873 | 3.550939611 | 0.632930814 | NA          | NA |
| ASV_16s_15717 | 0.169203076 | -0.585368873 | 3.550939611 | 0.632930814 | NA          | NA |
| ASV_16s_15718 | 0.167430573 | -0.582135363 | 3.550949723 | 0.629328706 | NA          | NA |
| ASV_16s_15719 | 0.16515164  | -0.5779287   | 3.550962977 | 0.624655707 | 0.99885007  | NA |
| ASV_16s_15720 | 0.1593277   | -0.566798929 | 3.550997951 | 0.612445696 | NA          | NA |
| ASV_16s_15721 | 0.1593277   | -0.566798929 | 3.550997951 | 0.612445696 | NA          | NA |
| ASV_16s_15722 | 0.1593277   | -0.566798929 | 3.550997951 | 0.612445696 | NA          | NA |
| ASV_16s_15723 | 0.1593277   | -0.566798929 | 3.550997951 | 0.612445696 | NA          | NA |
| ASV_16s_15724 | 0.296023686 | 1.553128993  | 3.550497118 | 0.591474313 | NA          | NA |
| ASV_16s_15725 | 0.049602854 | 0.052504152  | 3.551034386 | 0.35384616  | 0.999825396 | NA |
| ASV_16s_15726 | 0.030585364 | -0.142163541 | 3.551236554 | 0.11638502  | NA          | NA |
| ASV_16s_15727 | 0.061481993 | 0.220287905  | 3.551045861 | 0.279595502 | 0.999921201 | NA |
| ASV_16s_15730 | 0.167343136 | -0.131579976 | 3.55097885  | 0.917635166 | 0.996050075 | NA |
| ASV_16s_15731 | 0.180161729 | -0.067897742 | 3.551388358 | 0.799045243 | 0.997453685 | NA |
| ASV_16s_15732 | 0.166424524 | 0.036705322  | 3.550981281 | 0.936411668 | 0.995790136 | NA |
| ASV_16s_15733 | 0.168590343 | 0.063026219  | 3.550966288 | 0.947980134 | 0.995624614 | NA |
| ASV_16s_15734 | 0.169501497 | -0.308524003 | 3.551195939 | 0.84428775  | 0.996965275 | NA |
| ASV_16s_15735 | 0.192129634 | 0.290967501  | 3.550778572 | 0.743008226 | NA          | NA |
| ASV_16s_15736 | 0.173494648 | 0.734257449  | 3.551794281 | 0.60778241  | NA          | NA |
| ASV_16s_15737 | 0.163731045 | 0.256313141  | 3.551134949 | 0.915101155 | 0.996084338 | NA |
| ASV_16s_15738 | 0.225436443 | -0.692424477 | 3.550538906 | 0.823964142 | 0.99719163  | NA |
| ASV_16s_15739 | 0.163828014 | -0.201847771 | 3.550808126 | 0.675516358 | NA          | NA |
| ASV_16s_15740 | 0.171954069 | 0.455962186  | 3.551071337 | 0.795017299 | 0.997494471 | NA |
| ASV_16s_15741 | 0.22634437  | -0.680337278 | 3.550430671 | 0.887422617 | 0.996446091 | NA |
| ASV_16s_15742 | 0.207602869 | -0.64210346  | 3.550540395 | 0.852561337 | 0.996869817 | NA |
| ASV_16s_15743 | 0.203238744 | -0.067878986 | 3.551205366 | 1.017521545 | NA          | NA |
| ASV_16s_15744 | 0.191984992 | -0.035764703 | 3.551227233 | 0.814457998 | 0.99729359  | NA |
| ASV_16s_15745 | 0.207386    | -0.618813469 | 3.550508389 | 0.892394581 | 0.996382781 | NA |
| ASV_16s_15746 | 0.198204421 | -0.595881423 | 3.550575782 | 0.877750571 | 0.996567173 | NA |
| ASV_16s_15747 | 0.214048653 | -0.599029965 | 3.550437543 | 0.94728303  | NA          | NA |
| ASV_16s_15748 | 0.300505646 | 0.763155277  | 3.550183097 | 1.428512281 | 0.984681911 | NA |
| ASV_16s_15749 | 0.227282609 | -0.583065793 | 3.550808653 | 0.675683697 | 0.998515675 | NA |
| ASV_16s_15750 | 0.209487842 | -0.695896408 | 3.550441377 | 0.840238739 | 0.99701129  | NA |
| ASV_16s_15751 | 0.206708433 | -0.93928117  | 3.550827389 | 0.445114622 | 0.999623671 | NA |
| ASV_16s_15752 | 0.204531084 | -0.539621832 | 3.550529665 | 0.945525425 | 0.995660081 | NA |
| ASV_16s_15753 | 0.173038278 | 1.190027349  | 3.551375376 | 0.483084362 | 0.999506093 | NA |
| ASV_16s_15754 | 0.214209691 | -0.477859708 | 3.550535941 | 1.002444903 | 0.994789    | NA |
| ASV_16s_15755 | 0.220380436 | -0.541438897 | 3.550446407 | 1.034395194 | NA          | NA |
| ASV_16s_15756 | 0.16161226  | -0.649507945 | 3.550822595 | 0.507442186 | NA          | NA |
| ASV_16s_15757 | 0.142303951 | -0.2471499   | 3.551742111 | 0.57435507  | NA          | NA |
| ASV_16s_15758 | 0.193991272 | -0.406918738 | 3.550707954 | 1.023779049 | 0.994435772 | NA |

|               |             |              |             |             |             |    |
|---------------|-------------|--------------|-------------|-------------|-------------|----|
| ASV_16s_15759 | 0.200935968 | 0.182630395  | 3.549831208 | 0.889890442 | NA          | NA |
| ASV_16s_15760 | 0.197657254 | 0.18214643   | 3.549907328 | 0.8494584   | NA          | NA |
| ASV_16s_15761 | 0.179774885 | -0.461806985 | 3.550796967 | 0.77281836  | NA          | NA |
| ASV_16s_15762 | 0.192757337 | -0.002447721 | 3.55091605  | 0.882509928 | NA          | NA |
| ASV_16s_15763 | 0.174333599 | -0.069118032 | 3.550934326 | 0.915431871 | 0.996079877 | NA |
| ASV_16s_15764 | 0.209846457 | 0.334727123  | 3.550868946 | 1.370606735 | 0.986454589 | NA |
| ASV_16s_15765 | 0.221459337 | 1.242529811  | 3.550912175 | 0.673692185 | NA          | NA |
| ASV_16s_15766 | 0.176391369 | 1.174101435  | 3.551116173 | 0.594268742 | NA          | NA |
| ASV_16s_15767 | 0.185321602 | 1.391773152  | 3.550904905 | 0.42991413  | 0.999664806 | NA |
| ASV_16s_15768 | 0.1821052   | 1.184182889  | 3.551087787 | 0.605281955 | NA          | NA |
| ASV_16s_15769 | 0.20628116  | 0.982918642  | 3.551030394 | 0.859261285 | 0.996791093 | NA |
| ASV_16s_15770 | 0.227375369 | -0.311999259 | 3.550288125 | 1.07326768  | NA          | NA |
| ASV_16s_15771 | 0.225330549 | 0.368650287  | 3.551570843 | 0.458925815 | NA          | NA |
| ASV_16s_15772 | 0.241020323 | 0.384985429  | 3.551267448 | 0.733636625 | NA          | NA |
| ASV_16s_15773 | 0.206357888 | 0.352331746  | 3.551927254 | 0.379822923 | 0.999778495 | NA |
| ASV_16s_15774 | 0.181157456 | 0.364639497  | 3.551632194 | 0.637603717 | NA          | NA |
| ASV_16s_15775 | 0.181157456 | 0.364639497  | 3.551632194 | 0.637603717 | NA          | NA |
| ASV_16s_15776 | 0.265935569 | 0.098472694  | 3.550316715 | 1.089722625 | 0.993248501 | NA |
| ASV_16s_15777 | 0.22386071  | -0.559163558 | 3.550476233 | 0.708805657 | NA          | NA |
| ASV_16s_15778 | 0.214174832 | -1.014530297 | 3.550476593 | 0.396213516 | 0.999744814 | NA |
| ASV_16s_15779 | 0.133619647 | -0.471148163 | 3.551258907 | 0.542737511 | NA          | NA |
| ASV_16s_15780 | 0.133619647 | -0.471148163 | 3.551258907 | 0.542737511 | NA          | NA |
| ASV_16s_15781 | 0.118432804 | -0.689459973 | 3.551239201 | 0.276330172 | NA          | NA |
| ASV_16s_15782 | 0.191633732 | -1.00222855  | 3.550718076 | 0.362536275 | 0.999810557 | NA |
| ASV_16s_15783 | 0.174899635 | -0.527949114 | 3.550867875 | 0.628577522 | NA          | NA |
| ASV_16s_15784 | 0.174899635 | -0.527949114 | 3.550867875 | 0.628577522 | NA          | NA |
| ASV_16s_15785 | 0.142350612 | 1.37491145   | 3.551218766 | 0.295749081 | 0.99990468  | NA |
| ASV_16s_15786 | 0.103393318 | 1.033949951  | 3.551301193 | 0.365882022 | NA          | NA |
| ASV_16s_15787 | 0.103393318 | 1.033949951  | 3.551301193 | 0.365882022 | NA          | NA |
| ASV_16s_15788 | 0.177252571 | 1.204929732  | 3.550886949 | 0.536441142 | NA          | NA |
| ASV_16s_15789 | 0.224051865 | 0.403101595  | 3.55099523  | 0.642040734 | NA          | NA |
| ASV_16s_15790 | 0.203249702 | 0.394521429  | 3.551116287 | 0.609648575 | NA          | NA |
| ASV_16s_15791 | 0.184542399 | 0.38572635   | 3.551242608 | 0.5780371   | NA          | NA |
| ASV_16s_15792 | 0.184542399 | 0.38572635   | 3.551242608 | 0.5780371   | NA          | NA |
| ASV_16s_15793 | 0.152337572 | 0.370986212  | 3.55143315  | 0.515322957 | NA          | NA |
| ASV_16s_15794 | 0.152337572 | 0.370986212  | 3.55143315  | 0.515322957 | NA          | NA |
| ASV_16s_15795 | 0.239298729 | -0.152790194 | 3.549969738 | 1.18478093  | 0.991273102 | NA |
| ASV_16s_15796 | 0.05739026  | 0.341952344  | 3.551836488 | 0.250230199 | NA          | NA |
| ASV_16s_15797 | 0.11533526  | 0.353792081  | 3.551625815 | 0.414532697 | 0.999703181 | NA |
| ASV_16s_15798 | 0.092604914 | -0.389204005 | 3.551303297 | 0.369567036 | NA          | NA |
| ASV_16s_15799 | 0.092604914 | -0.389204005 | 3.551303297 | 0.369567036 | NA          | NA |
| ASV_16s_15800 | 0.092604914 | -0.389204005 | 3.551303297 | 0.369567036 | NA          | NA |
| ASV_16s_15801 | 0.092604914 | -0.389204005 | 3.551303297 | 0.369567036 | NA          | NA |
| ASV_16s_15802 | 0.092604914 | -0.389204005 | 3.551303297 | 0.369567036 | NA          | NA |
| ASV_16s_15803 | 0.146527513 | 0.548835532  | 3.550713751 | 0.782370672 | 0.997619731 | NA |
| ASV_16s_15804 | 0.112466544 | -0.440131264 | 3.551142883 | 0.424184684 | NA          | NA |
| ASV_16s_15805 | 0.103073168 | -0.418553033 | 3.55122454  | 0.399154192 | NA          | NA |
| ASV_16s_15806 | 0.157361403 | -0.078466164 | 3.550861619 | 0.820595302 | NA          | NA |
| ASV_16s_15807 | 0.157361403 | -0.078466164 | 3.550861619 | 0.820595302 | NA          | NA |
| ASV_16s_15808 | 0.157361403 | -0.078466164 | 3.550861619 | 0.820595302 | NA          | NA |
| ASV_16s_15809 | 0.157361403 | -0.078466164 | 3.550861619 | 0.820595302 | NA          | NA |
| ASV_16s_15810 | 0.157361403 | -0.078466164 | 3.550861619 | 0.820595302 | NA          | NA |
| ASV_16s_15811 | 0.165642073 | -0.078522677 | 3.550844346 | 0.845025981 | 0.996956836 | NA |
| ASV_16s_15812 | 0.177545536 | -0.078596983 | 3.55082232  | 0.878468856 | NA          | NA |
| ASV_16s_15813 | 0.108523227 | 0.220134453  | 3.550843282 | 0.492634518 | 0.999473006 | NA |
| ASV_16s_15814 | 0.110553983 | 0.220130749  | 3.550838401 | 0.500492557 | 0.999444676 | NA |
| ASV_16s_15815 | 0.117150124 | 0.220119612  | 3.550823707 | 0.525403506 | NA          | NA |
| ASV_16s_15816 | 0.116916183 | 0.220119986  | 3.5508242   | 0.524533607 | NA          | NA |
| ASV_16s_15817 | 0.194536444 | 0.310942736  | 3.550924299 | 0.903642116 | 0.996236869 | NA |
| ASV_16s_15818 | 0.12340841  | 0.595888366  | 3.550772498 | 0.486781426 | NA          | NA |
| ASV_16s_15819 | 0.222695478 | 0.519268592  | 3.551338165 | 0.721123396 | NA          | NA |
| ASV_16s_15820 | 0.18181358  | 0.313389302  | 3.551032771 | 0.753727129 | 0.997888011 | NA |
| ASV_16s_15821 | 0.165983426 | -0.06737794  | 3.550827442 | 0.941081448 | 0.995723817 | NA |
| ASV_16s_15822 | 0.217660005 | 0.371332746  | 3.515920257 | 0.94855     | 0.995616353 | NA |
| ASV_16s_15823 | 0.153979204 | 0.612416552  | 3.550599776 | 0.757149093 | 0.997857069 | NA |
| ASV_16s_15824 | 0.181923806 | -0.068078861 | 3.550732267 | 1.072079584 | NA          | NA |
| ASV_16s_15825 | 0.188602258 | 1.42454609   | 3.55105859  | 0.377987136 | 0.999782065 | NA |

|               |             |              |             |             |             |    |
|---------------|-------------|--------------|-------------|-------------|-------------|----|
| ASV_16s_15826 | 0.198514484 | -0.147883296 | 3.550688688 | 0.872399889 | 0.996632988 | NA |
| ASV_16s_15827 | 0.210332663 | 1.671245449  | 3.550763378 | 0.279035193 | 0.999921736 | NA |
| ASV_16s_15828 | 0.166280733 | -0.068081277 | 3.550783363 | 1.050662579 | 0.993969359 | NA |
| ASV_16s_15829 | 0.192840948 | 0.63367626   | 3.55157977  | 0.570819545 | 0.999143643 | NA |
| ASV_16s_15830 | 0.16727177  | -0.067766591 | 3.550758553 | 1.051831354 | 0.993948537 | NA |
| ASV_16s_15831 | 0.167767288 | -0.067623148 | 3.550755288 | 1.050673639 | 0.993969162 | NA |
| ASV_16s_15832 | 0.361738313 | 1.547952002  | 3.550412762 | 0.605266389 | NA          | NA |
| ASV_16s_15833 | 0.286816288 | 0.532266709  | 3.550757422 | 1.464426527 | NA          | NA |
| ASV_16s_15834 | 0.188718207 | 0.35788705   | 3.55077866  | 1.041994262 | 0.994122369 | NA |
| ASV_16s_15835 | 0.206471051 | 0.436355769  | 3.550894665 | 0.907178747 | 0.996190212 | NA |
| ASV_16s_15836 | 0.187617974 | 0.956419009  | 3.551005776 | 0.679156011 | NA          | NA |
| ASV_16s_15837 | 0.19279235  | 0.33416564   | 3.551264631 | 0.635505772 | 0.998783706 | NA |
| ASV_16s_15838 | 0.095659222 | 0.2849452    | 3.551758694 | 0.439579337 | NA          | NA |
| ASV_16s_15839 | 0.078780833 | 0.28674648   | 3.551814839 | 0.384646687 | NA          | NA |
| ASV_16s_15840 | 0.110469546 | 0.283554981  | 3.55171864  | 0.483467692 | NA          | NA |
| ASV_16s_15841 | 0.260961227 | -0.590145228 | 3.550908656 | 0.767110823 | NA          | NA |
| ASV_16s_15842 | 0.050942491 | -0.175285292 | 3.551761104 | 0.280872156 | NA          | NA |
| ASV_16s_15843 | 0.359433179 | -0.564839631 | 3.54981008  | 0.860122194 | NA          | NA |
| ASV_16s_15844 | 0.232507331 | 0.345296046  | 3.551420608 | 0.530001942 | NA          | NA |
| ASV_16s_15845 | 0.132061285 | -0.078243907 | 3.55092773  | 0.739263351 | NA          | NA |
| ASV_16s_15846 | 0.132061285 | -0.078243907 | 3.55092773  | 0.739263351 | NA          | NA |
| ASV_16s_15847 | 0.296548122 | 0.416303699  | 3.550840327 | 1.832077496 | 0.968547177 | NA |
| ASV_16s_15848 | 0.291505748 | -0.029148341 | 3.550798268 | 1.184154197 | NA          | NA |
| ASV_16s_15849 | 0.241286281 | 0.204851965  | 3.550394681 | 1.30532858  | 0.988296215 | NA |
| ASV_16s_15850 | 0.235166589 | 0.627353219  | 3.55098345  | 1.244788553 | NA          | NA |
| ASV_16s_15851 | 0.174236355 | -0.028586787 | 3.550984807 | 0.928473619 | NA          | NA |
| ASV_16s_15852 | 0.145405256 | -0.073235976 | 3.550927319 | 0.807718821 | NA          | NA |
| ASV_16s_15853 | 0.18209474  | 0.299790043  | 3.55063719  | 1.049768479 | NA          | NA |
| ASV_16s_15854 | 0.193500425 | 0.338536436  | 3.550520021 | 1.125960797 | 0.992532952 | NA |
| ASV_16s_15855 | 0.142792567 | -0.073209459 | 3.55093484  | 0.799302194 | NA          | NA |
| ASV_16s_15856 | 0.142792567 | -0.073209459 | 3.55093484  | 0.799302194 | NA          | NA |
| ASV_16s_15857 | 0.142792567 | -0.073209459 | 3.55093484  | 0.799302194 | NA          | NA |
| ASV_16s_15858 | 0.19869921  | 0.582316276  | 3.550349947 | 0.950520688 | NA          | NA |
| ASV_16s_15859 | 0.198755326 | 0.360318749  | 3.551104371 | 0.975944385 | NA          | NA |
| ASV_16s_15860 | 0.207266665 | 0.359830794  | 3.551440175 | 0.751583324 | NA          | NA |
| ASV_16s_15861 | 0.189280042 | 0.340441714  | 3.551228636 | 0.70274738  | NA          | NA |
| ASV_16s_15862 | 0.25686767  | 0.335335915  | 3.550947217 | 0.874241738 | 0.996610427 | NA |
| ASV_16s_15863 | 0.176686618 | 0.360299421  | 3.55116761  | 0.91828673  | NA          | NA |
| ASV_16s_15864 | 0.176686618 | 0.360299421  | 3.55116761  | 0.91828673  | NA          | NA |
| ASV_16s_15865 | 0.176686618 | 0.360299421  | 3.55116761  | 0.91828673  | NA          | NA |
| ASV_16s_15866 | 0.176686618 | 0.360299421  | 3.55116761  | 0.91828673  | NA          | NA |
| ASV_16s_15867 | 0.20093827  | 0.315939671  | 3.550944197 | 0.942404514 | 0.995704905 | NA |
| ASV_16s_15868 | 0.214797889 | 0.315939642  | 3.550921305 | 0.974908938 | 0.995223199 | NA |
| ASV_16s_15869 | 0.191371552 | 0.315939694  | 3.550961935 | 0.918381707 | 0.996039945 | NA |
| ASV_16s_15870 | 0.228725418 | 0.315939617  | 3.550901065 | 1.006434681 | 0.994724067 | NA |
| ASV_16s_15871 | 0.190701921 | 0.315939696  | 3.550963239 | 0.916675532 | 0.996063073 | NA |
| ASV_16s_15872 | 0.190017529 | 0.315939697  | 3.550964585 | 0.91491137  | 0.996086896 | NA |
| ASV_16s_15873 | 0.190017529 | 0.315939697  | 3.550964585 | 0.91491137  | 0.996086896 | NA |
| ASV_16s_15874 | 0.190017529 | 0.315939697  | 3.550964585 | 0.91491137  | 0.996086896 | NA |
| ASV_16s_15875 | 0.189675334 | 0.315939698  | 3.550965262 | 0.914027195 | 0.996098    | NA |
| ASV_16s_15876 | 0.237135348 | 0.552256799  | 3.550851975 | 1.50240348  | 0.982226335 | NA |
| ASV_16s_15877 | 0.188306551 | 0.559131589  | 3.550922653 | 1.263348142 | 0.989394442 | NA |
| ASV_16s_15878 | 0.188306551 | 0.315939702  | 3.550967994 | 0.910476386 | 0.996146371 | NA |
| ASV_16s_15879 | 0.21685792  | 0.315939638  | 3.550918173 | 0.979409249 | 0.99515389  | NA |
| ASV_16s_15880 | 0.184542399 | 0.315939804  | 3.550975713 | 0.900593647 | NA          | NA |
| ASV_16s_15881 | 0.184542399 | 0.315939804  | 3.550975713 | 0.900593647 | NA          | NA |
| ASV_16s_15882 | 0.184542399 | 0.315939804  | 3.550975713 | 0.900593647 | NA          | NA |
| ASV_16s_15883 | 0.184542399 | 0.315939804  | 3.550975713 | 0.900593647 | NA          | NA |
| ASV_16s_15884 | 0.184542399 | 0.315939804  | 3.550975713 | 0.900593647 | NA          | NA |
| ASV_16s_15885 | 0.184542399 | 0.315939804  | 3.550975713 | 0.900593647 | NA          | NA |
| ASV_16s_15886 | 0.222131233 | 0.315939629  | 3.550910366 | 0.991748042 | 0.994960556 | NA |
| ASV_16s_15887 | 0.20901706  | 0.746802342  | 3.550845419 | 1.238978185 | 0.990001568 | NA |
| ASV_16s_15888 | 0.248477317 | 0.596176203  | 3.550660642 | 0.815799001 | NA          | NA |
| ASV_16s_15889 | 0.175746561 | 0.687702594  | 3.550931848 | 0.789731537 | NA          | NA |
| ASV_16s_15890 | 0.175746561 | 0.687702594  | 3.550931848 | 0.789731537 | NA          | NA |
| ASV_16s_15891 | 0.240803616 | 1.096350491  | 3.550742805 | 0.755583141 | 0.997871265 | NA |
| ASV_16s_15892 | 0.244126918 | 0.734089589  | 3.551016003 | 1.015667979 | NA          | NA |

|               |             |              |             |             |             |    |
|---------------|-------------|--------------|-------------|-------------|-------------|----|
| ASV_16s_15893 | 0.244126918 | 0.734089589  | 3.551016003 | 1.015667979 | NA          | NA |
| ASV_16s_15894 | 0.244126918 | 0.734089589  | 3.551016003 | 1.015667979 | NA          | NA |
| ASV_16s_15895 | 0.244126918 | 0.734089589  | 3.551016003 | 1.015667979 | NA          | NA |
| ASV_16s_15896 | 0.244126918 | 0.734089589  | 3.551016003 | 1.015667979 | NA          | NA |
| ASV_16s_15897 | 0.364975897 | 0.734590148  | 3.550870794 | 1.218539591 | NA          | NA |
| ASV_16s_15898 | 0.120929651 | 0.724763162  | 3.551432553 | 0.685650965 | NA          | NA |
| ASV_16s_15899 | 0.120929651 | 0.724763162  | 3.551432553 | 0.685650965 | NA          | NA |
| ASV_16s_15900 | 0.120929651 | 0.724763162  | 3.551432553 | 0.685650965 | NA          | NA |
| ASV_16s_15901 | 0.120929651 | 0.724763162  | 3.551432553 | 0.685650965 | NA          | NA |
| ASV_16s_15902 | 0.120929651 | 0.724763162  | 3.551432553 | 0.685650965 | NA          | NA |
| ASV_16s_15903 | 0.210644886 | 0.692975551  | 3.550904007 | 0.901896131 | 0.996259765 | NA |
| ASV_16s_15904 | 0.229766047 | 0.693075016  | 3.550874882 | 0.944849563 | 0.995669813 | NA |
| ASV_16s_15905 | 0.230261419 | 0.693077375  | 3.550874191 | 0.945919279 | 0.995654403 | NA |
| ASV_16s_15906 | 0.213548853 | 0.692991787  | 3.550899252 | 0.908625797 | 0.996171014 | NA |
| ASV_16s_15907 | 0.194330832 | 0.692877253  | 3.550933354 | 0.862546059 | 0.99675203  | NA |
| ASV_16s_15908 | 0.233398774 | 0.693093545  | 3.550869886 | 0.952645569 | NA          | NA |
| ASV_16s_15909 | 0.233398774 | 0.693093545  | 3.550869886 | 0.952645569 | NA          | NA |
| ASV_16s_15910 | 0.233398774 | 0.693093545  | 3.550869886 | 0.952645569 | NA          | NA |
| ASV_16s_15911 | 0.215860588 | 0.6930044    | 3.550895557 | 0.913922683 | 0.996100206 | NA |
| ASV_16s_15912 | 0.217834761 | 0.693014905  | 3.55089248  | 0.918345826 | 0.996040432 | NA |
| ASV_16s_15913 | 0.270611977 | 0.693242057  | 3.5508264   | 1.026667198 | NA          | NA |
| ASV_16s_15914 | 0.270611977 | 0.693242057  | 3.5508264   | 1.026667198 | NA          | NA |
| ASV_16s_15915 | 0.15502562  | 0.292235328  | 3.551762147 | 0.584838954 | NA          | NA |
| ASV_16s_15916 | 0.15502562  | 0.292235328  | 3.551762147 | 0.584838954 | NA          | NA |
| ASV_16s_15917 | 0.15502562  | 0.292235328  | 3.551762147 | 0.584838954 | NA          | NA |
| ASV_16s_15918 | 0.15502562  | 0.292235328  | 3.551762147 | 0.584838954 | NA          | NA |
| ASV_16s_15919 | 0.15502562  | 0.292235328  | 3.551762147 | 0.584838954 | NA          | NA |
| ASV_16s_15920 | 0.15502562  | 0.292235328  | 3.551762147 | 0.584838954 | NA          | NA |
| ASV_16s_15921 | 0.15502562  | 0.292235328  | 3.551762147 | 0.584838954 | NA          | NA |
| ASV_16s_15922 | 0.15502562  | 0.292235328  | 3.551762147 | 0.584838954 | NA          | NA |
| ASV_16s_15923 | 0.15502562  | 0.292235328  | 3.551762147 | 0.584838954 | NA          | NA |
| ASV_16s_15924 | 0.15502562  | 0.292235328  | 3.551762147 | 0.584838954 | NA          | NA |
| ASV_16s_15925 | 0.15502562  | 0.292235328  | 3.551762147 | 0.584838954 | NA          | NA |
| ASV_16s_15926 | 0.15502562  | 0.292235328  | 3.551762147 | 0.584838954 | NA          | NA |
| ASV_16s_15927 | 0.164328928 | 0.041620115  | 3.551294071 | 0.837519568 | NA          | NA |
| ASV_16s_15928 | 0.157096971 | 0.032749774  | 3.551332548 | 0.844687307 | NA          | NA |
| ASV_16s_15929 | 0.157355889 | 0.007555174  | 3.551288873 | 0.868057781 | NA          | NA |
| ASV_16s_15930 | 0.157614808 | -0.016324831 | 3.551248638 | 0.889393962 | 0.996421076 | NA |
| ASV_16s_15931 | 0.157873727 | -0.038966306 | 3.551210754 | 0.908860804 | 0.99616789  | NA |
| ASV_16s_15932 | 0.155116885 | -0.127955058 | 3.551118103 | 0.962040863 | 0.99541785  | NA |
| ASV_16s_15933 | 0.172356084 | -0.18014363  | 3.550919668 | 1.033841197 | 0.994264003 | NA |
| ASV_16s_15934 | 0.15942724  | -0.160356057 | 3.55104591  | 0.98582135  | 0.995054026 | NA |
| ASV_16s_15935 | 0.15942724  | -0.160356057 | 3.55104591  | 0.98582135  | 0.995054026 | NA |
| ASV_16s_15936 | 0.170278138 | -0.225124536 | 3.550907359 | 1.02754412  | 0.99437189  | NA |
| ASV_16s_15937 | 0.160203997 | -0.216357112 | 3.550997868 | 0.989947647 | 0.994989069 | NA |
| ASV_16s_15938 | 0.160203997 | -0.216357112 | 3.550997868 | 0.989947647 | 0.994989069 | NA |
| ASV_16s_15939 | 0.158431493 | -0.211583397 | 3.551016795 | 0.98404489  | 0.995081824 | NA |
| ASV_16s_15940 | 0.160462915 | -0.234744777 | 3.550985911 | 0.987963771 | 0.995020368 | NA |
| ASV_16s_15941 | 0.160721834 | -0.253073108 | 3.55097584  | 0.984808574 | 0.995069887 | NA |
| ASV_16s_15942 | 0.158955035 | -0.266732248 | 3.550986637 | 0.970566628 | 0.995289466 | NA |
| ASV_16s_15943 | 0.158448605 | -0.265499951 | 3.550991792 | 0.968498491 | 0.995320819 | NA |
| ASV_16s_15944 | 0.172605445 | -0.297794282 | 3.550859971 | 1.012235764 | 0.994628734 | NA |
| ASV_16s_15945 | 0.155162517 | -0.27581532  | 3.551018118 | 0.945081157 | 0.99566648  | NA |
| ASV_16s_15946 | 0.161239672 | -0.29026865  | 3.550958019 | 0.967550639 | 0.995335143 | NA |
| ASV_16s_15947 | 0.158206799 | -0.301511402 | 3.550982144 | 0.943221625 | 0.995693198 | NA |
| ASV_16s_15948 | 0.15517963  | -0.331798469 | 3.55100396  | 0.902020123 | 0.996258142 | NA |
| ASV_16s_15949 | 0.155185334 | -0.350599615 | 3.551001474 | 0.884314809 | 0.996485295 | NA |
| ASV_16s_15950 | 0.155191038 | -0.369558084 | 3.551000054 | 0.864933204 | NA          | NA |
| ASV_16s_15951 | 0.155191038 | -0.369558084 | 3.551000054 | 0.864933204 | NA          | NA |
| ASV_16s_15952 | 0.174238596 | -0.505765944 | 3.55088221  | 0.78653734  | 0.997578929 | NA |
| ASV_16s_15953 | 0.055419792 | -0.218258262 | 3.55177906  | 0.307846848 | NA          | NA |
| ASV_16s_15954 | 0.055419792 | -0.218258262 | 3.55177906  | 0.307846848 | NA          | NA |
| ASV_16s_15955 | 0.055419792 | -0.218258262 | 3.55177906  | 0.307846848 | NA          | NA |
| ASV_16s_15956 | 0.211503812 | -0.643598227 | 3.550700048 | 0.709049415 | NA          | NA |
| ASV_16s_15957 | 0.202694546 | -0.635310595 | 3.550753186 | 0.694775557 | 0.998375558 | NA |
| ASV_16s_15958 | 0.199912673 | -0.632617983 | 3.550770803 | 0.690162328 | 0.998410188 | NA |
| ASV_16s_15959 | 0.218120692 | -0.649441281 | 3.550662279 | 0.719388396 | NA          | NA |

|               |             |              |             |             |             |    |
|---------------|-------------|--------------|-------------|-------------|-------------|----|
| ASV_16s_15960 | 0.205365212 | -0.637858573 | 3.550736673 | 0.699154653 | 0.998342224 | NA |
| ASV_16s_15961 | 0.18811392  | -0.61636673  | 3.550834162 | 0.669257832 | 0.998560956 | NA |
| ASV_16s_15962 | 0.17778086  | -0.600176468 | 3.550891432 | 0.649796504 | 0.998692446 | NA |
| ASV_16s_15963 | 0.16030667  | -0.568677097 | 3.550992073 | 0.614469741 | 0.99891012  | NA |
| ASV_16s_15964 | 0.159547025 | -0.567194348 | 3.550996712 | 0.612857939 | 0.998919424 | NA |
| ASV_16s_15965 | 0.159040596 | -0.566201297 | 3.550999826 | 0.611779689 | 0.998925619 | NA |
| ASV_16s_15966 | 0.155242374 | -0.55865697  | 3.551023679 | 0.603622209 | NA          | NA |
| ASV_16s_15967 | 0.155242374 | -0.55865697  | 3.551023679 | 0.603622209 | NA          | NA |
| ASV_16s_15968 | 0.155242374 | -0.55865697  | 3.551023679 | 0.603622209 | NA          | NA |
| ASV_16s_15969 | 0.155242374 | -0.55865697  | 3.551023679 | 0.603622209 | NA          | NA |
| ASV_16s_15970 | 0.049461213 | -0.164801889 | 3.55102805  | 0.235054196 | NA          | NA |
| ASV_16s_15971 | 0.045784401 | -0.161178215 | 3.551055853 | 0.213169973 | 0.999968713 | NA |
| ASV_16s_15972 | 0.052152581 | 0.221301565  | 3.551121257 | 0.22844402  | NA          | NA |
| ASV_16s_15974 | 0.109848003 | 0.595818484  | 3.550799879 | 0.438553309 | NA          | NA |
| ASV_16s_15975 | 0.201797481 | -0.625759051 | 3.550830321 | 0.698080677 | 0.998350441 | NA |
| ASV_16s_15976 | 0.213989666 | -0.674030833 | 3.550640322 | 0.769914937 | 0.997738996 | NA |
| ASV_16s_15977 | 0.205590633 | 0.657624848  | 3.55170382  | 0.688500295 | NA          | NA |
| ASV_16s_15978 | 0.159242653 | -0.211599112 | 3.550882162 | 0.646968764 | NA          | NA |
| ASV_16s_15979 | 0.159213465 | 0.760962766  | 3.551679487 | 0.531153385 | NA          | NA |
| ASV_16s_15980 | 0.197818745 | -0.137287821 | 3.550493925 | 0.902687343 | 0.9962494   | NA |
| ASV_16s_15981 | 0.201835437 | -0.646651537 | 3.550646678 | 0.796285653 | 0.997481675 | NA |
| ASV_16s_15982 | 0.164191686 | -0.047211233 | 3.550933085 | 0.544336184 | NA          | NA |
| ASV_16s_15983 | 0.174163842 | 0.675357787  | 3.551536416 | 0.757452311 | NA          | NA |
| ASV_16s_15984 | 0.170414108 | 0.459031104  | 3.551344612 | 0.75606687  | 0.997866886 | NA |
| ASV_16s_15985 | 0.177643519 | 0.681704959  | 3.551422265 | 0.798850173 | NA          | NA |
| ASV_16s_15986 | 0.209307958 | -0.614375898 | 3.550486754 | 0.904482083 | NA          | NA |
| ASV_16s_15987 | 0.162611704 | 0.675347299  | 3.551429717 | 0.744810572 | NA          | NA |
| ASV_16s_15988 | 0.196655034 | -0.568857105 | 3.550578419 | 0.886292123 | 0.996460384 | NA |
| ASV_16s_15989 | 0.210172478 | -0.586551132 | 3.550467665 | 0.936504475 | 0.995788825 | NA |
| ASV_16s_15990 | 0.207695381 | -0.565751249 | 3.550493042 | 0.941037708 | NA          | NA |
| ASV_16s_15991 | 0.193707668 | 1.421805182  | 3.550706454 | 0.341025791 | 0.999845791 | NA |
| ASV_16s_15992 | 0.228757288 | -0.597135933 | 3.550345109 | 1.026459679 | 0.994390337 | NA |
| ASV_16s_15993 | 0.213809954 | -0.551151176 | 3.550468134 | 0.978944902 | 0.995161071 | NA |
| ASV_16s_15994 | 0.164413435 | 0.157664412  | 3.551792591 | 0.63900111  | 0.998761793 | NA |
| ASV_16s_15995 | 0.192967304 | -0.500128303 | 3.550622979 | 0.914481445 | 0.996092687 | NA |
| ASV_16s_15996 | 0.194051141 | -0.46163628  | 3.550636705 | 0.925813279 | 0.995938176 | NA |
| ASV_16s_15997 | 0.159288632 | 0.674645094  | 3.551211883 | 0.603069283 | 0.998974789 | NA |
| ASV_16s_15998 | 0.214250747 | -0.122803508 | 3.550869464 | 0.99995229  | NA          | NA |
| ASV_16s_15999 | 0.16777683  | -0.088068276 | 3.551024598 | 0.820012575 | 0.997234314 | NA |
| ASV_16s_16000 | 0.213162903 | -0.427304018 | 3.551003846 | 0.604887731 | 0.998964651 | NA |
| ASV_16s_16001 | 0.173910803 | -0.330075388 | 3.550859755 | 0.895979618 | NA          | NA |
| ASV_16s_16002 | 0.230482251 | 0.22904777   | 3.550856261 | 0.922927288 | 0.995977896 | NA |
| ASV_16s_16003 | 0.190461472 | -0.399187417 | 3.550700347 | 0.920376414 | 0.996012793 | NA |
| ASV_16s_16004 | 0.175660207 | -0.740662807 | 3.550710177 | 0.510217764 | NA          | NA |
| ASV_16s_16005 | 0.219795396 | -0.266514513 | 3.550504119 | 0.845956856 | 0.996946173 | NA |
| ASV_16s_16006 | 0.204623851 | 0.678217089  | 3.551048412 | 0.920833655 | 0.996006552 | NA |
| ASV_16s_16007 | 0.175740965 | -0.378004942 | 3.550951666 | 0.417955321 | 0.999694917 | NA |
| ASV_16s_16008 | 0.245175656 | 0.949824797  | 3.550770468 | 0.778922565 | 0.997653152 | NA |
| ASV_16s_16009 | 0.180970241 | 0.14742022   | 3.551699365 | 0.725226513 | 0.99813431  | NA |
| ASV_16s_16010 | 0.210269528 | 0.681024468  | 3.550983992 | 0.913111159 | NA          | NA |
| ASV_16s_16011 | 0.189672765 | 0.381112159  | 3.551112261 | 0.821408743 | 0.997219282 | NA |
| ASV_16s_16012 | 0.210752232 | -0.165756957 | 3.550835488 | 0.965248939 | 0.99536981  | NA |
| ASV_16s_16013 | 0.212599798 | 0.210276372  | 3.550808796 | 0.929686738 | NA          | NA |
| ASV_16s_16014 | 0.223606338 | 0.12350202   | 3.550765601 | 1.145769278 | 0.992122423 | NA |
| ASV_16s_16015 | 0.095318684 | 0.552871116  | 3.551520216 | 0.313297446 | NA          | NA |
| ASV_16s_16016 | 0.199263545 | 1.513803784  | 3.550845261 | 0.370976725 | NA          | NA |
| ASV_16s_16017 | 0.28870662  | 0.334045721  | 3.551859697 | 0.527313213 | NA          | NA |
| ASV_16s_16018 | 0.209441252 | 1.362961754  | 3.550956445 | 0.559315789 | 0.999199007 | NA |
| ASV_16s_16019 | 0.234277567 | 1.035820847  | 3.551325309 | 0.596173457 | 0.999012624 | NA |
| ASV_16s_16020 | 0.255487796 | 0.70166087   | 3.550655551 | 1.2550682   | 0.989603207 | NA |
| ASV_16s_16021 | 0.177435836 | 1.175933308  | 3.551110968 | 0.596248168 | NA          | NA |
| ASV_16s_16022 | 0.177435836 | 1.175933308  | 3.551110968 | 0.596248168 | NA          | NA |
| ASV_16s_16023 | 0.234060798 | 0.596202935  | 3.551584473 | 0.656250176 | 0.998649773 | NA |
| ASV_16s_16024 | 0.270534187 | 0.498264126  | 3.550862272 | 0.936199622 | NA          | NA |
| ASV_16s_16025 | 0.168221365 | 0.358229449  | 3.551703033 | 0.612687063 | NA          | NA |
| ASV_16s_16026 | 0.168221365 | 0.358229449  | 3.551703033 | 0.612687063 | NA          | NA |
| ASV_16s_16027 | 0.168221365 | 0.358229449  | 3.551703033 | 0.612687063 | NA          | NA |

|               |             |              |             |             |             |    |
|---------------|-------------|--------------|-------------|-------------|-------------|----|
| ASV_16s_16028 | 0.20365248  | 0.37462075   | 3.551490338 | 0.676752369 | NA          | NA |
| ASV_16s_16029 | 0.20365248  | 0.37462075   | 3.551490338 | 0.676752369 | NA          | NA |
| ASV_16s_16030 | 0.215221795 | 0.364570721  | 3.551614138 | 0.44136853  | NA          | NA |
| ASV_16s_16031 | 0.218812723 | 0.880778113  | 3.551257787 | 0.661634367 | NA          | NA |
| ASV_16s_16032 | 0.13036151  | 0.343507039  | 3.55188174  | 0.528938224 | NA          | NA |
| ASV_16s_16033 | 0.13036151  | 0.343507039  | 3.55188174  | 0.528938224 | NA          | NA |
| ASV_16s_16034 | 0.13036151  | 0.343507039  | 3.55188174  | 0.528938224 | NA          | NA |
| ASV_16s_16035 | 0.176512393 | 0.362318522  | 3.55165838  | 0.628830006 | NA          | NA |
| ASV_16s_16036 | 0.176512393 | 0.362318522  | 3.55165838  | 0.628830006 | NA          | NA |
| ASV_16s_16037 | 0.223262066 | 0.68219292   | 3.550685084 | 0.652567667 | NA          | NA |
| ASV_16s_16038 | 0.146390616 | -0.494567155 | 3.551155216 | 0.570497709 | NA          | NA |
| ASV_16s_16039 | 0.224545148 | 0.555180595  | 3.550520732 | 0.94596076  | 0.995653804 | NA |
| ASV_16s_16040 | 0.130193502 | -0.463978653 | 3.551286572 | 0.534497345 | NA          | NA |
| ASV_16s_16041 | 0.155202706 | 0.309000527  | 3.550952995 | 0.530032766 | NA          | NA |
| ASV_16s_16042 | 0.100742207 | 1.025391277  | 3.55132266  | 0.35854406  | NA          | NA |
| ASV_16s_16043 | 0.124851399 | 1.0958422    | 3.551153787 | 0.421567169 | NA          | NA |
| ASV_16s_16044 | 0.188202273 | 0.38774979   | 3.551218864 | 0.584419546 | 0.999074927 | NA |
| ASV_16s_16045 | 0.219904825 | -0.095302558 | 3.550100089 | 1.132460087 | 0.992399778 | NA |
| ASV_16s_16046 | 0.148431481 | 0.369103905  | 3.551456802 | 0.506944582 | NA          | NA |
| ASV_16s_16047 | 0.148431481 | 0.369103905  | 3.551456802 | 0.506944582 | NA          | NA |
| ASV_16s_16048 | 0.15627003  | 0.584279104  | 3.551096315 | 0.707067363 | NA          | NA |
| ASV_16s_16049 | 0.090230429 | -0.381440985 | 3.551320221 | 0.362456591 | NA          | NA |
| ASV_16s_16050 | 0.090230429 | -0.381440985 | 3.551320221 | 0.362456591 | NA          | NA |
| ASV_16s_16051 | 0.201623799 | -0.08588391  | 3.550125604 | 0.903697152 | 0.996236145 | NA |
| ASV_16s_16052 | 0.294699612 | -0.548075751 | 3.549814543 | 0.725912077 | NA          | NA |
| ASV_16s_16053 | 0.109582787 | -0.433619452 | 3.551167812 | 0.416564788 | NA          | NA |
| ASV_16s_16054 | 0.109582787 | -0.433619452 | 3.551167812 | 0.416564788 | NA          | NA |
| ASV_16s_16055 | 0.109582787 | -0.433619452 | 3.551167812 | 0.416564788 | NA          | NA |
| ASV_16s_16056 | 0.109582787 | -0.433619452 | 3.551167812 | 0.416564788 | NA          | NA |
| ASV_16s_16057 | 0.109582787 | -0.433619452 | 3.551167812 | 0.416564788 | NA          | NA |
| ASV_16s_16058 | 0.079614782 | 0.950832963  | 3.551500083 | 0.297329525 | NA          | NA |
| ASV_16s_16059 | 0.179810543 | -0.07861029  | 3.550818474 | 0.884555115 | NA          | NA |
| ASV_16s_16060 | 0.179810543 | -0.07861029  | 3.550818474 | 0.884555115 | NA          | NA |
| ASV_16s_16061 | 0.179810543 | -0.07861029  | 3.550818474 | 0.884555115 | NA          | NA |
| ASV_16s_16062 | 0.153326495 | -0.078435687 | 3.550870727 | 0.808281526 | NA          | NA |
| ASV_16s_16063 | 0.153326495 | -0.078435687 | 3.550870727 | 0.808281526 | NA          | NA |
| ASV_16s_16064 | 0.153326495 | -0.078435687 | 3.550870727 | 0.808281526 | NA          | NA |
| ASV_16s_16065 | 0.153326495 | -0.078435687 | 3.550870727 | 0.808281526 | NA          | NA |
| ASV_16s_16066 | 0.153326495 | -0.078435687 | 3.550870727 | 0.808281526 | NA          | NA |
| ASV_16s_16067 | 0.153326495 | -0.078435687 | 3.550870727 | 0.808281526 | NA          | NA |
| ASV_16s_16068 | 0.172993086 | -0.078570052 | 3.550830404 | 0.865848758 | NA          | NA |
| ASV_16s_16069 | 0.173824787 | 0.310945336  | 3.550964184 | 0.848599999 | 0.996915763 | NA |
| ASV_16s_16070 | 0.18783429  | 1.21250432   | 3.551028369 | 0.584578067 | 0.999074105 | NA |
| ASV_16s_16071 | 0.209967454 | 0.608992142  | 3.550978214 | 0.713221569 | NA          | NA |
| ASV_16s_16072 | 0.152560305 | 0.35333206   | 3.551679724 | 0.415962888 | NA          | NA |
| ASV_16s_16073 | 0.17799767  | -0.068051237 | 3.550785247 | 0.999020771 | NA          | NA |
| ASV_16s_16074 | 0.253881635 | 1.825177003  | 3.550433937 | 0.278743757 | 0.999922013 | NA |
| ASV_16s_16075 | 0.212898849 | 1.377949113  | 3.550984625 | 0.565461472 | 0.999169741 | NA |
| ASV_16s_16076 | 0.159768234 | -0.067767059 | 3.550828693 | 0.986485906 | NA          | NA |
| ASV_16s_16077 | 0.193887213 | 1.63776743   | 3.550881797 | 0.23284847  | 0.999957706 | NA |
| ASV_16s_16078 | 0.195750159 | -0.064477061 | 3.550748614 | 0.915286573 | 0.996081837 | NA |
| ASV_16s_16079 | 0.248235965 | 0.317188853  | 3.550934532 | 0.767199832 | NA          | NA |
| ASV_16s_16080 | 0.169854788 | -0.060953773 | 3.55079745  | 1.021998605 | 0.994465819 | NA |
| ASV_16s_16081 | 0.174573355 | -0.061098488 | 3.550765975 | 1.03053049  | NA          | NA |
| ASV_16s_16082 | 0.172398451 | -0.05456249  | 3.550834809 | 1.006818175 | NA          | NA |
| ASV_16s_16083 | 0.165912847 | 0.373479989  | 3.551601977 | 0.586138442 | NA          | NA |
| ASV_16s_16084 | 0.195678928 | 0.592898677  | 3.550705707 | 0.835958839 | NA          | NA |
| ASV_16s_16085 | 0.093206421 | 0.28519452   | 3.551766172 | 0.431903507 | NA          | NA |
| ASV_16s_16086 | 0.093206421 | 0.28519452   | 3.551766172 | 0.431903507 | NA          | NA |
| ASV_16s_16087 | 0.308824952 | -0.160616682 | 3.549665468 | 1.193395156 | NA          | NA |
| ASV_16s_16088 | 0.209356764 | 0.32371003   | 3.55109699  | 0.643929893 | 0.998730445 | NA |
| ASV_16s_16089 | 0.20365248  | -0.541451666 | 3.550303521 | 0.608573812 | NA          | NA |
| ASV_16s_16090 | 0.225812107 | 1.267094415  | 3.550684493 | 0.619639846 | NA          | NA |
| ASV_16s_16091 | 0.186949236 | 0.672165826  | 3.550536681 | 0.780558988 | 0.99763733  | NA |
| ASV_16s_16092 | 0.128675098 | -0.078207715 | 3.55093856  | 0.727434972 | NA          | NA |
| ASV_16s_16093 | 0.128675098 | -0.078207715 | 3.55093856  | 0.727434972 | NA          | NA |
| ASV_16s_16094 | 0.180836195 | -0.108783729 | 3.550532478 | 1.05310858  | 0.993925729 | NA |

|               |             |              |             |             |             |    |
|---------------|-------------|--------------|-------------|-------------|-------------|----|
| ASV_16s_16095 | 0.275267823 | 0.472796426  | 3.550875535 | 1.652688923 | 0.976548255 | NA |
| ASV_16s_16096 | 0.271847566 | 0.475626451  | 3.550243643 | 1.463866739 | 0.983534294 | NA |
| ASV_16s_16097 | 0.251472484 | 0.472536986  | 3.550252084 | 1.371576858 | 0.986425975 | NA |
| ASV_16s_16098 | 0.169768756 | -0.028550282 | 3.550996995 | 0.915886991 | NA          | NA |
| ASV_16s_16099 | 0.169768756 | -0.028550282 | 3.550996995 | 0.915886991 | NA          | NA |
| ASV_16s_16100 | 0.169768756 | -0.028550282 | 3.550996995 | 0.915886991 | NA          | NA |
| ASV_16s_16101 | 0.244405368 | 0.791461102  | 3.550293273 | 0.892120278 | 0.996386293 | NA |
| ASV_16s_16102 | 0.176562162 | -0.073490863 | 3.550854705 | 0.899890783 | 0.996285951 | NA |
| ASV_16s_16103 | 0.141676917 | -0.073197953 | 3.550938158 | 0.795609849 | NA          | NA |
| ASV_16s_16104 | 0.141676917 | -0.073197953 | 3.550938158 | 0.795609849 | NA          | NA |
| ASV_16s_16105 | 0.139131219 | -0.073170757 | 3.550945875 | 0.787248826 | NA          | NA |
| ASV_16s_16106 | 0.139131219 | -0.073170757 | 3.550945875 | 0.787248826 | NA          | NA |
| ASV_16s_16107 | 0.206325791 | 0.290765503  | 3.550169006 | 1.118780965 | NA          | NA |
| ASV_16s_16108 | 0.20888331  | 0.344479761  | 3.550453982 | 1.150260882 | 0.992027406 | NA |
| ASV_16s_16109 | 0.200097482 | 0.330114016  | 3.550479999 | 1.152137866 | NA          | NA |
| ASV_16s_16110 | 0.193659035 | 0.360314672  | 3.551117733 | 0.963076832 | NA          | NA |
| ASV_16s_16111 | 0.172156192 | 0.360294849  | 3.55118261  | 0.905627307 | NA          | NA |
| ASV_16s_16112 | 0.172156192 | 0.360294849  | 3.55118261  | 0.905627307 | NA          | NA |
| ASV_16s_16113 | 0.172156192 | 0.360294849  | 3.55118261  | 0.905627307 | NA          | NA |
| ASV_16s_16114 | 0.172156192 | 0.360294849  | 3.55118261  | 0.905627307 | NA          | NA |
| ASV_16s_16115 | 0.172156192 | 0.360294849  | 3.55118261  | 0.905627307 | NA          | NA |
| ASV_16s_16116 | 0.172156192 | 0.360294849  | 3.55118261  | 0.905627307 | NA          | NA |
| ASV_16s_16117 | 0.250126033 | 0.639964101  | 3.550969734 | 1.431031541 | NA          | NA |
| ASV_16s_16118 | 0.213478725 | 0.613953779  | 3.550797278 | 1.100146214 | 0.993047339 | NA |
| ASV_16s_16119 | 0.247150674 | 0.315939606  | 3.550877774 | 1.045693899 | 0.994057371 | NA |
| ASV_16s_16120 | 0.199159809 | 0.315939693  | 3.550947388 | 0.937939119 | 0.995768517 | NA |
| ASV_16s_16121 | 0.192813977 | 0.315939785  | 3.550959164 | 0.922021027 | NA          | NA |
| ASV_16s_16122 | 0.186996651 | 0.315939724  | 3.550970665 | 0.906989627 | 0.996192716 | NA |
| ASV_16s_16123 | 0.186654455 | 0.315939725  | 3.550971364 | 0.906092687 | 0.996204579 | NA |
| ASV_16s_16124 | 0.184601282 | 0.315939731  | 3.55097561  | 0.900680538 | 0.996275652 | NA |
| ASV_16s_16125 | 0.19890335  | 0.315939524  | 3.550947871 | 0.936253392 | 0.995792372 | NA |
| ASV_16s_16126 | 0.183574695 | 0.315939734  | 3.550977769 | 0.897954634 | 0.99631112  | NA |
| ASV_16s_16127 | 0.183574695 | 0.315939734  | 3.550977769 | 0.897954634 | 0.99631112  | NA |
| ASV_16s_16128 | 0.182548108 | 0.346370282  | 3.550965616 | 1.02372202  | 0.994436736 | NA |
| ASV_16s_16129 | 0.179810543 | 0.315939827  | 3.550985894 | 0.887849855 | NA          | NA |
| ASV_16s_16130 | 0.179810543 | 0.315939827  | 3.550985894 | 0.887849855 | NA          | NA |
| ASV_16s_16131 | 0.171240239 | 0.6876718    | 3.550941742 | 0.777387864 | NA          | NA |
| ASV_16s_16132 | 0.171240239 | 0.6876718    | 3.550941742 | 0.777387864 | NA          | NA |
| ASV_16s_16133 | 0.171240239 | 0.6876718    | 3.550941742 | 0.777387864 | NA          | NA |
| ASV_16s_16134 | 0.171240239 | 0.6876718    | 3.550941742 | 0.777387864 | NA          | NA |
| ASV_16s_16135 | 0.246386447 | 0.984343571  | 3.550826302 | 0.809545353 | 0.997345315 | NA |
| ASV_16s_16136 | 0.248105866 | 0.734112582  | 3.551009013 | 1.023667732 | 0.994437654 | NA |
| ASV_16s_16137 | 0.237867253 | 0.734049965  | 3.551027537 | 1.002650338 | NA          | NA |
| ASV_16s_16138 | 0.237867253 | 0.734049965  | 3.551027537 | 1.002650338 | NA          | NA |
| ASV_16s_16139 | 0.237867253 | 0.734049965  | 3.551027537 | 1.002650338 | NA          | NA |
| ASV_16s_16140 | 0.237867253 | 0.734049965  | 3.551027537 | 1.002650338 | NA          | NA |
| ASV_16s_16141 | 0.237867253 | 0.734049965  | 3.551027537 | 1.002650338 | NA          | NA |
| ASV_16s_16142 | 0.237867253 | 0.734049965  | 3.551027537 | 1.002650338 | NA          | NA |
| ASV_16s_16143 | 0.237867253 | 0.734049965  | 3.551027537 | 1.002650338 | NA          | NA |
| ASV_16s_16144 | 0.237867253 | 0.734049965  | 3.551027537 | 1.002650338 | NA          | NA |
| ASV_16s_16145 | 0.237867253 | 0.734049965  | 3.551027537 | 1.002650338 | NA          | NA |
| ASV_16s_16146 | 0.117828891 | 0.723065989  | 3.551448492 | 0.674599298 | NA          | NA |
| ASV_16s_16147 | 0.22113948  | 0.693033904  | 3.550887417 | 0.925808406 | NA          | NA |
| ASV_16s_16148 | 0.19394939  | 0.692873261  | 3.55093412  | 0.861523202 | 0.996764227 | NA |
| ASV_16s_16149 | 0.237033861 | 0.69310891   | 3.55086506  | 0.960249411 | 0.995444536 | NA |
| ASV_16s_16150 | 0.22741419  | 0.693065272  | 3.550878218 | 0.939674247 | NA          | NA |
| ASV_16s_16151 | 0.22741419  | 0.693065272  | 3.550878218 | 0.939674247 | NA          | NA |
| ASV_16s_16152 | 0.22741419  | 0.693065272  | 3.550878218 | 0.939674247 | NA          | NA |
| ASV_16s_16153 | 0.238048585 | 0.693113444  | 3.550863732 | 0.962379359 | 0.995412796 | NA |
| ASV_16s_16154 | 0.201106911 | 0.692919312  | 3.550920613 | 0.879136273 | 0.996549994 | NA |
| ASV_16s_16155 | 0.179810543 | 0.692773342  | 3.550963937 | 0.825173746 | NA          | NA |
| ASV_16s_16156 | 0.179810543 | 0.692773342  | 3.550963937 | 0.825173746 | NA          | NA |
| ASV_16s_16157 | 0.179810543 | 0.692773342  | 3.550963937 | 0.825173746 | NA          | NA |
| ASV_16s_16158 | 0.179810543 | 0.692773342  | 3.550963937 | 0.825173746 | NA          | NA |
| ASV_16s_16159 | 0.199672753 | 0.692910297  | 3.550923256 | 0.875431802 | 0.996595797 | NA |
| ASV_16s_16160 | 0.208663923 | 0.692964493  | 3.550907366 | 0.897122565 | 0.996321902 | NA |
| ASV_16s_16161 | 0.263673209 | 0.69321645   | 3.550833597 | 1.013548864 | NA          | NA |

|               |             |              |             |             |             |    |
|---------------|-------------|--------------|-------------|-------------|-------------|----|
| ASV_16s_16162 | 0.150945998 | 0.292847599  | 3.551773776 | 0.57581696  | NA          | NA |
| ASV_16s_16163 | 0.150945998 | 0.292847599  | 3.551773776 | 0.57581696  | NA          | NA |
| ASV_16s_16164 | 0.150945998 | 0.292847599  | 3.551773776 | 0.57581696  | NA          | NA |
| ASV_16s_16165 | 0.150945998 | 0.292847599  | 3.551773776 | 0.57581696  | NA          | NA |
| ASV_16s_16166 | 0.150945998 | 0.292847599  | 3.551773776 | 0.57581696  | NA          | NA |
| ASV_16s_16167 | 0.150945998 | 0.292847599  | 3.551773776 | 0.57581696  | NA          | NA |
| ASV_16s_16168 | 0.150945998 | 0.292847599  | 3.551773776 | 0.57581696  | NA          | NA |
| ASV_16s_16169 | 0.150945998 | 0.292847599  | 3.551773776 | 0.57581696  | NA          | NA |
| ASV_16s_16170 | 0.150945998 | 0.292847599  | 3.551773776 | 0.57581696  | NA          | NA |
| ASV_16s_16171 | 0.150945998 | 0.292847599  | 3.551773776 | 0.57581696  | NA          | NA |
| ASV_16s_16172 | 0.150945998 | 0.292847599  | 3.551773776 | 0.57581696  | NA          | NA |
| ASV_16s_16173 | 0.150945998 | 0.292847599  | 3.551773776 | 0.57581696  | NA          | NA |
| ASV_16s_16174 | 0.150974519 | 0.122704152  | 3.551521111 | 0.743780531 | NA          | NA |
| ASV_16s_16175 | 0.150980223 | 0.094602352  | 3.551478387 | 0.771563527 | NA          | NA |
| ASV_16s_16176 | 0.16490096  | -0.047002265 | 3.551134233 | 0.918032191 | 0.99604469  | NA |
| ASV_16s_16177 | 0.154053024 | -0.064564877 | 3.551207536 | 0.911819187 | 0.996128426 | NA |
| ASV_16s_16178 | 0.151014447 | -0.051248782 | 3.551249968 | 0.897477723 | 0.996317302 | NA |
| ASV_16s_16179 | 0.154570862 | -0.106691479 | 3.551147881 | 0.940350227 | 0.995734246 | NA |
| ASV_16s_16180 | 0.1550887   | -0.14671765  | 3.551099236 | 0.960221653 | 0.995444948 | NA |
| ASV_16s_16181 | 0.153822626 | -0.142602853 | 3.551115465 | 0.95510062  | 0.995520676 | NA |
| ASV_16s_16182 | 0.1550887   | -0.14671765  | 3.551099236 | 0.960221653 | 0.995444948 | NA |
| ASV_16s_16183 | 0.1550887   | -0.14671765  | 3.551099236 | 0.960221653 | 0.995444948 | NA |
| ASV_16s_16184 | 0.1550887   | -0.14671765  | 3.551099236 | 0.960221653 | 0.995444948 | NA |
| ASV_16s_16185 | 0.155865456 | -0.204456928 | 3.551045315 | 0.966686614 | 0.995348176 | NA |
| ASV_16s_16186 | 0.15106008  | -0.20944526  | 3.551089085 | 0.949005298 | 0.995609746 | NA |
| ASV_16s_16187 | 0.166457435 | -0.249531714 | 3.550927495 | 1.000567566 | 0.994819376 | NA |
| ASV_16s_16188 | 0.153592227 | -0.216494254 | 3.551059908 | 0.957226397 | 0.99548934  | NA |
| ASV_16s_16189 | 0.156383294 | -0.242171013 | 3.551020419 | 0.962867961 | 0.995405495 | NA |
| ASV_16s_16190 | 0.151065784 | -0.228125659 | 3.55107844  | 0.946466776 | 0.995646502 | NA |
| ASV_16s_16191 | 0.156642213 | -0.261008388 | 3.551010668 | 0.958673125 | 0.995467934 | NA |
| ASV_16s_16192 | 0.15716005  | -0.29905774  | 3.550992512 | 0.939360601 | 0.995748334 | NA |
| ASV_16s_16193 | 0.163618213 | -0.313563708 | 3.550931829 | 0.957526133 | 0.995448911 | NA |
| ASV_16s_16194 | 0.157677888 | -0.337298059 | 3.550981012 | 0.910346688 | 0.996148102 | NA |
| ASV_16s_16195 | 0.152366082 | -0.343753552 | 3.551024572 | 0.874858507 | 0.99660285  | NA |
| ASV_16s_16196 | 0.153885371 | -0.347525312 | 3.551012558 | 0.879929409 | 0.996540135 | NA |
| ASV_16s_16197 | 0.151128528 | -0.440277795 | 3.551038561 | 0.757900978 | NA          | NA |
| ASV_16s_16198 | 0.176281542 | -0.508896242 | 3.550868207 | 0.791161085 | 0.997533114 | NA |
| ASV_16s_16199 | 0.154679239 | -0.469398286 | 3.55101532  | 0.73870587  | 0.998020342 | NA |
| ASV_16s_16200 | 0.053961377 | -0.210401577 | 3.551787179 | 0.301874665 | NA          | NA |
| ASV_16s_16201 | 0.208898106 | -0.641158522 | 3.55071551  | 0.70482632  | 0.998298378 | NA |
| ASV_16s_16202 | 0.193883138 | -0.624811178 | 3.550803992 | 0.679634647 | 0.998487368 | NA |
| ASV_16s_16203 | 0.193419492 | -0.624140368 | 3.550806367 | 0.678809293 | 0.998493311 | NA |
| ASV_16s_16204 | 0.212380674 | -0.644379995 | 3.550695116 | 0.710382158 | NA          | NA |
| ASV_16s_16205 | 0.200262968 | -0.632936337 | 3.55076872  | 0.690685426 | 0.998406286 | NA |
| ASV_16s_16206 | 0.208316397 | -0.640617197 | 3.55071897  | 0.703890972 | NA          | NA |
| ASV_16s_16207 | 0.174329757 | -0.594442512 | 3.5509116   | 0.642995917 | 0.998736426 | NA |
| ASV_16s_16208 | 0.160525995 | -0.569070779 | 3.550990845 | 0.614880334 | NA          | NA |
| ASV_16s_16209 | 0.160525995 | -0.569070779 | 3.550990845 | 0.614880334 | NA          | NA |
| ASV_16s_16210 | 0.160525995 | -0.569070779 | 3.550990845 | 0.614880334 | NA          | NA |
| ASV_16s_16211 | 0.17118161  | -0.588835054 | 3.550928848 | 0.636350658 | 0.998778433 | NA |
| ASV_16s_16212 | 0.153689196 | -0.555487142 | 3.551033812 | 0.600187619 | 0.998990716 | NA |
| ASV_16s_16213 | 0.151157049 | -0.550311491 | 3.551050491 | 0.594629242 | NA          | NA |
| ASV_16s_16214 | 0.151157049 | -0.550311491 | 3.551050491 | 0.594629242 | NA          | NA |
| ASV_16s_16215 | 0.151157049 | -0.550311491 | 3.551050491 | 0.594629242 | NA          | NA |
| ASV_16s_16216 | 0.151157049 | -0.550311491 | 3.551050491 | 0.594629242 | NA          | NA |
| ASV_16s_16217 | 0.151157049 | -0.550311491 | 3.551050491 | 0.594629242 | NA          | NA |
| ASV_16s_16218 | 0.151157049 | -0.550311491 | 3.551050491 | 0.594629242 | NA          | NA |
| ASV_16s_16219 | 0.048159602 | -0.163550264 | 3.551037452 | 0.227353496 | NA          | NA |
| ASV_16s_16220 | 0.065639989 | 0.175494059  | 3.550895158 | 0.464161912 | 0.999567413 | NA |
| ASV_16s_16221 | 0.049434461 | 0.024542286  | 3.551026725 | 0.356416451 | 0.999821094 | NA |
| ASV_16s_16222 | 0.042717921 | -0.157922493 | 3.551082503 | 0.194410751 | NA          | NA |
| ASV_16s_16223 | 0.042717921 | -0.157922493 | 3.551082503 | 0.194410751 | NA          | NA |
| ASV_16s_16224 | 0.042717921 | -0.157922493 | 3.551082503 | 0.194410751 | NA          | NA |
| ASV_16s_16225 | 0.046422186 | 0.026130914  | 3.551055591 | 0.327583004 | 0.999865341 | NA |
| ASV_16s_16226 | 0.051254026 | -0.166466109 | 3.551015886 | 0.245465109 | NA          | NA |
| ASV_16s_16227 | 0.050780145 | 0.221897571  | 3.551131089 | 0.22057358  | NA          | NA |
| ASV_16s_16228 | 0.195830346 | -0.51773942  | 3.550849237 | 0.91577054  | 0.996075306 | NA |



|               |             |              |             |             |             |    |
|---------------|-------------|--------------|-------------|-------------|-------------|----|
| ASV_16s_16229 | 0.154486171 | 0.61720886   | 3.551805615 | 0.60252909  | NA          | NA |
| ASV_16s_16230 | 0.165014387 | 0.168915544  | 3.551209664 | 0.842629704 | 0.996984174 | NA |
| ASV_16s_16231 | 0.15682214  | 0.380228675  | 3.551415441 | 0.785828976 | 0.997585898 | NA |
| ASV_16s_16232 | 0.198338559 | -0.644428784 | 3.550697766 | 0.76629638  | 0.99777289  | NA |
| ASV_16s_16233 | 0.194542946 | -0.636714908 | 3.550724525 | 0.756601589 | 0.997862039 | NA |
| ASV_16s_16234 | 0.16114915  | 0.306082152  | 3.551966943 | 0.451499992 | NA          | NA |
| ASV_16s_16235 | 0.163287292 | 0.121977239  | 3.550960934 | 0.697013    | 0.998358582 | NA |
| ASV_16s_16236 | 0.195031112 | -0.631887076 | 3.550691508 | 0.780555307 | 0.997637366 | NA |
| ASV_16s_16237 | 0.16956088  | 0.006558516  | 3.550875786 | 0.557854262 | 0.999205863 | NA |
| ASV_16s_16238 | 0.196032099 | -0.612518747 | 3.550613127 | 0.826374168 | 0.997165387 | NA |
| ASV_16s_16239 | 0.156657433 | -0.137407058 | 3.550848885 | 0.688578234 | NA          | NA |
| ASV_16s_16240 | 0.204197421 | -0.613366966 | 3.550532711 | 0.874173108 | NA          | NA |
| ASV_16s_16241 | 0.186313642 | -0.572974866 | 3.550674657 | 0.829527549 | 0.997130808 | NA |
| ASV_16s_16242 | 0.199107634 | -0.571513557 | 3.55055733  | 0.89166373  | NA          | NA |
| ASV_16s_16243 | 0.188907431 | -0.539670742 | 3.550643681 | 0.866791014 | NA          | NA |
| ASV_16s_16244 | 0.182739789 | -0.090456262 | 3.550648951 | 0.853206145 | 0.996862296 | NA |
| ASV_16s_16245 | 0.183724337 | 0.459154984  | 3.550988842 | 0.661815301 | 0.998612237 | NA |
| ASV_16s_16246 | 0.195056419 | -0.539577737 | 3.55059392  | 0.895112527 | 0.996347865 | NA |
| ASV_16s_16247 | 0.224074063 | -0.586212623 | 3.551017676 | 0.813668156 | 0.99730195  | NA |
| ASV_16s_16248 | 0.198472795 | -0.536336935 | 3.550570963 | 0.913321266 | 0.996108288 | NA |
| ASV_16s_16249 | 0.199754296 | -0.212776223 | 3.550378921 | 0.643283024 | 0.998734589 | NA |
| ASV_16s_16250 | 0.201679497 | -0.547869935 | 3.550543551 | 0.921978669 | 0.995990896 | NA |
| ASV_16s_16251 | 0.215583456 | 0.002611661  | 3.550731542 | 1.022140222 | 0.994463433 | NA |
| ASV_16s_16252 | 0.195079168 | -0.502146407 | 3.550850348 | 0.76363988  | 0.997797557 | NA |
| ASV_16s_16253 | 0.19492398  | -0.485104991 | 3.550617705 | 0.918811349 | 0.996034107 | NA |
| ASV_16s_16254 | 0.198369945 | -0.478637803 | 3.550603721 | 0.934673807 | 0.995814646 | NA |
| ASV_16s_16255 | 0.211263647 | -0.152470998 | 3.550559637 | 0.927903501 | 0.995909251 | NA |
| ASV_16s_16256 | 0.200792986 | -0.436779645 | 3.550624163 | 0.949689893 | NA          | NA |
| ASV_16s_16257 | 0.211350994 | -0.087523028 | 3.550596143 | 0.951612699 | 0.995571786 | NA |
| ASV_16s_16258 | 0.128432189 | 0.665266988  | 3.551726715 | 0.691277469 | 0.998401863 | NA |
| ASV_16s_16259 | 0.214433266 | -0.481531969 | 3.550531949 | 1.000682876 | NA          | NA |
| ASV_16s_16260 | 0.164234298 | -0.703445951 | 3.550792384 | 0.495407388 | NA          | NA |
| ASV_16s_16261 | 0.203623598 | 1.369077044  | 3.551020922 | 0.490972642 | 0.999478869 | NA |
| ASV_16s_16262 | 0.219718502 | 0.153323902  | 3.551213588 | 0.775002632 | 0.997690769 | NA |
| ASV_16s_16263 | 0.197662588 | -0.383238855 | 3.550686196 | 0.939005632 | NA          | NA |
| ASV_16s_16264 | 0.235789178 | -0.577811932 | 3.550742206 | 0.732946868 | NA          | NA |
| ASV_16s_16265 | 0.141154331 | 0.64991041   | 3.551792227 | 0.514730491 | 0.999390737 | NA |
| ASV_16s_16266 | 0.179967852 | -0.39999644  | 3.551186641 | 0.421991207 | 0.999684972 | NA |
| ASV_16s_16267 | 0.170265815 | 1.355242063  | 3.551332895 | 0.356402044 | 0.999821118 | NA |
| ASV_16s_16268 | 0.173786867 | -0.209157072 | 3.550854696 | 0.852816043 | NA          | NA |
| ASV_16s_16269 | 0.190342821 | -0.403938203 | 3.551054399 | 0.633009961 | 0.998799193 | NA |
| ASV_16s_16270 | 0.186458519 | -0.165748113 | 3.550862278 | 0.88813083  | 0.996437117 | NA |
| ASV_16s_16271 | 0.187003887 | 0.265504154  | 3.550929339 | 0.84753142  | NA          | NA |
| ASV_16s_16272 | 0.166081576 | -0.038076942 | 3.551427005 | 0.70449684  | NA          | NA |
| ASV_16s_16273 | 0.182555145 | 0.152965977  | 3.551493583 | 0.6397432   | NA          | NA |
| ASV_16s_16274 | 0.192032949 | -0.002455036 | 3.550888133 | 0.887500092 | 0.99644511  | NA |
| ASV_16s_16275 | 0.192425112 | 0.0469419    | 3.551087702 | 0.945880233 | NA          | NA |
| ASV_16s_16276 | 0.174687595 | 0.357964766  | 3.551314321 | 0.748862843 | NA          | NA |
| ASV_16s_16277 | 0.179927966 | -0.531611663 | 3.550958329 | 0.617589345 | NA          | NA |
| ASV_16s_16278 | 0.213642961 | 0.733114114  | 3.550385004 | 0.800461335 | 0.997439242 | NA |
| ASV_16s_16279 | 0.201610765 | 1.215843243  | 3.55100036  | 0.639184755 | 0.998760634 | NA |
| ASV_16s_16280 | 0.188301593 | 1.194652315  | 3.551058654 | 0.616791679 | NA          | NA |
| ASV_16s_16281 | 0.188301593 | 1.194652315  | 3.551058654 | 0.616791679 | NA          | NA |
| ASV_16s_16282 | 0.172766472 | 1.167478099  | 3.551135159 | 0.587037291 | NA          | NA |
| ASV_16s_16283 | 0.172766472 | 1.167478099  | 3.551135159 | 0.587037291 | NA          | NA |
| ASV_16s_16284 | 0.168644208 | 0.826464787  | 3.55111781  | 0.953832396 | 0.995539304 | NA |
| ASV_16s_16285 | 0.194095196 | 1.439030454  | 3.550819253 | 0.486041004 | 0.999496005 | NA |
| ASV_16s_16286 | 0.163794487 | 0.355946963  | 3.551728526 | 0.603748305 | NA          | NA |
| ASV_16s_16287 | 0.128114961 | -0.272246479 | 3.551609267 | 0.481978955 | 0.999509828 | NA |
| ASV_16s_16288 | 0.198293204 | 0.372503582  | 3.551523534 | 0.667728434 | NA          | NA |
| ASV_16s_16289 | 0.193704688 | 0.370635587  | 3.551553375 | 0.658396459 | NA          | NA |
| ASV_16s_16290 | 0.126930944 | 0.342392824  | 3.551892329 | 0.520378234 | NA          | NA |
| ASV_16s_16291 | 0.126930944 | 0.342392824  | 3.551892329 | 0.520378234 | NA          | NA |
| ASV_16s_16292 | 0.126930944 | 0.342392824  | 3.551892329 | 0.520378234 | NA          | NA |
| ASV_16s_16293 | 0.17186733  | 0.360043124  | 3.551683064 | 0.619812447 | NA          | NA |
| ASV_16s_16294 | 0.203297826 | -0.106865352 | 3.55165114  | 0.59932208  | NA          | NA |
| ASV_16s_16295 | 0.177168391 | 0.963247935  | 3.551407382 | 0.581763233 | NA          | NA |

|               |             |              |             |             |             |    |
|---------------|-------------|--------------|-------------|-------------|-------------|----|
| ASV_16s_16296 | 0.186415462 | -0.178943363 | 3.551531669 | 0.666172597 | 0.998582365 | NA |
| ASV_16s_16297 | 0.195763282 | -0.789049833 | 3.550771051 | 0.526742529 | NA          | NA |
| ASV_16s_16298 | 0.212380674 | -0.552598273 | 3.550553958 | 0.691358941 | NA          | NA |
| ASV_16s_16299 | 0.172041684 | -0.525587189 | 3.550896705 | 0.623192853 | 0.998858828 | NA |
| ASV_16s_16300 | 0.197783075 | 0.25733389   | 3.550437036 | 1.071099324 | 0.993598645 | NA |
| ASV_16s_16301 | 0.115091177 | 1.068893605  | 3.551215907 | 0.395955415 | 0.99974537  | NA |
| ASV_16s_16302 | 0.098091097 | 1.016625198  | 3.551345035 | 0.351122744 | NA          | NA |
| ASV_16s_16303 | 0.098091097 | 1.016625198  | 3.551345035 | 0.351122744 | NA          | NA |
| ASV_16s_16304 | 0.121565836 | 1.087007822  | 3.551173769 | 0.413319354 | NA          | NA |
| ASV_16s_16305 | 0.121565836 | 1.087007822  | 3.551173769 | 0.413319354 | NA          | NA |
| ASV_16s_16306 | 0.168162695 | 1.189927027  | 3.550929734 | 0.518585837 | NA          | NA |
| ASV_16s_16307 | 0.168162695 | 1.189927027  | 3.550929734 | 0.518585837 | NA          | NA |
| ASV_16s_16308 | 0.261454368 | 0.415617426  | 3.550811813 | 0.693652407 | NA          | NA |
| ASV_16s_16309 | 0.144525389 | 0.367170232  | 3.551481536 | 0.498399613 | NA          | NA |
| ASV_16s_16310 | 0.2475786   | 0.411821552  | 3.550880173 | 0.675447018 | NA          | NA |
| ASV_16s_16311 | 0.156371348 | 0.372857714  | 3.551410047 | 0.523668533 | NA          | NA |
| ASV_16s_16312 | 0.156371348 | 0.372857714  | 3.551410047 | 0.523668533 | NA          | NA |
| ASV_16s_16313 | 0.166668375 | 0.603310147  | 3.551000059 | 0.746081649 | NA          | NA |
| ASV_16s_16314 | 0.05444717  | 0.341748808  | 3.551848657 | 0.239320047 | NA          | NA |
| ASV_16s_16315 | 0.087855944 | -0.373465373 | 3.551337753 | 0.355219446 | NA          | NA |
| ASV_16s_16316 | 0.087855944 | -0.373465373 | 3.551337753 | 0.355219446 | NA          | NA |
| ASV_16s_16317 | 0.215518103 | -0.543519582 | 3.55021897  | 0.626381321 | NA          | NA |
| ASV_16s_16318 | 0.106699029 | -0.426949254 | 3.551193756 | 0.408830058 | NA          | NA |
| ASV_16s_16319 | 0.106699029 | -0.426949254 | 3.551193756 | 0.408830058 | NA          | NA |
| ASV_16s_16320 | 0.106699029 | -0.426949254 | 3.551193756 | 0.408830058 | NA          | NA |
| ASV_16s_16321 | 0.097787364 | -0.404836805 | 3.551266661 | 0.384437756 | NA          | NA |
| ASV_16s_16322 | 0.097787364 | -0.404836805 | 3.551266661 | 0.384437756 | NA          | NA |
| ASV_16s_16323 | 0.097787364 | -0.404836805 | 3.551266661 | 0.384437756 | NA          | NA |
| ASV_16s_16324 | 0.175078687 | -0.078582915 | 3.550826673 | 0.871563091 | NA          | NA |
| ASV_16s_16325 | 0.149291588 | -0.078402177 | 3.550880326 | 0.795717129 | NA          | NA |
| ASV_16s_16326 | 0.149291588 | -0.078402177 | 3.550880326 | 0.795717129 | NA          | NA |
| ASV_16s_16327 | 0.149291588 | -0.078402177 | 3.550880326 | 0.795717129 | NA          | NA |
| ASV_16s_16328 | 0.149291588 | -0.078402177 | 3.550880326 | 0.795717129 | NA          | NA |
| ASV_16s_16329 | 0.149291588 | -0.078402177 | 3.550880326 | 0.795717129 | NA          | NA |
| ASV_16s_16330 | 0.10385137  | 0.220143573  | 3.550855263 | 0.474104719 | 0.999535884 | NA |
| ASV_16s_16331 | 0.107188431 | 0.220137016  | 3.55084662  | 0.487311907 | 0.999491627 | NA |
| ASV_16s_16332 | 0.111142425 | 0.220129761  | 3.550837046 | 0.502651685 | NA          | NA |
| ASV_16s_16333 | 0.142854188 | 0.212944523  | 3.550820548 | 0.383161427 | NA          | NA |
| ASV_16s_16334 | 0.192892289 | 0.310942956  | 3.550927189 | 0.89933452  | NA          | NA |
| ASV_16s_16335 | 0.189089878 | 0.310943395  | 3.550933978 | 0.889563043 | NA          | NA |
| ASV_16s_16336 | 0.272940372 | 0.813219952  | 3.550446813 | 1.343248067 | 0.987246467 | NA |
| ASV_16s_16337 | 0.21793531  | -0.140667547 | 3.550861573 | 0.874888478 | 0.996602481 | NA |
| ASV_16s_16338 | 0.157163898 | 0.536715746  | 3.55171805  | 0.625824257 | NA          | NA |
| ASV_16s_16339 | 0.265588235 | 0.789590409  | 3.551058945 | 0.775610301 | NA          | NA |
| ASV_16s_16340 | 0.155237807 | -0.067921408 | 3.550860388 | 0.957075394 | NA          | NA |
| ASV_16s_16341 | 0.231020503 | -1.055227242 | 3.550775554 | 0.44765309  | NA          | NA |
| ASV_16s_16342 | 0.21138156  | 0.668311852  | 3.550357263 | 0.693614506 | NA          | NA |
| ASV_16s_16343 | 0.149522301 | -0.051022624 | 3.551235551 | 0.744482979 | 0.997970118 | NA |
| ASV_16s_16344 | 0.209946599 | 1.524316043  | 3.550786388 | 0.355452146 | 0.999822716 | NA |
| ASV_16s_16345 | 0.158210917 | -0.06786368  | 3.550850383 | 1.003314033 | 0.994774899 | NA |
| ASV_16s_16346 | 0.192188441 | 1.40577927   | 3.551098361 | 0.378051857 | 0.99978194  | NA |
| ASV_16s_16347 | 0.159697472 | -0.067318127 | 3.550847938 | 1.000861429 | 0.994814629 | NA |
| ASV_16s_16348 | 0.183409751 | 0.456317153  | 3.551322998 | 0.824381855 | 0.997187093 | NA |
| ASV_16s_16349 | 0.134637465 | 1.135829645  | 3.551497797 | 0.451546523 | 0.999605271 | NA |
| ASV_16s_16350 | 0.137693218 | 0.309244904  | 3.551482035 | 0.698851876 | NA          | NA |
| ASV_16s_16351 | 0.169035778 | -0.012614157 | 3.551090177 | 0.931616237 | NA          | NA |
| ASV_16s_16352 | 0.181731531 | 0.320808294  | 3.551200863 | 0.692101073 | 0.998395695 | NA |
| ASV_16s_16353 | 0.276599436 | 1.191042762  | 3.550587056 | 0.743462153 | NA          | NA |
| ASV_16s_16354 | 0.296812336 | 0.281658567  | 3.551328021 | 0.831409135 | NA          | NA |
| ASV_16s_16355 | 0.125861501 | 0.282278861  | 3.551684217 | 0.525527465 | NA          | NA |
| ASV_16s_16356 | 0.07474079  | 0.287217345  | 3.551830353 | 0.370540771 | NA          | NA |
| ASV_16s_16357 | 0.07474079  | 0.287217345  | 3.551830353 | 0.370540771 | NA          | NA |
| ASV_16s_16358 | 0.07474079  | 0.287217345  | 3.551830353 | 0.370540771 | NA          | NA |
| ASV_16s_16359 | 0.07474079  | 0.287217345  | 3.551830353 | 0.370540771 | NA          | NA |
| ASV_16s_16360 | 0.252501213 | 0.358510045  | 3.551568771 | 0.52958672  | NA          | NA |
| ASV_16s_16361 | 0.297288256 | 0.356874518  | 3.551363535 | 0.531522447 | 0.999322677 | NA |
| ASV_16s_16362 | 0.219869683 | 1.261239976  | 3.550709591 | 0.610382362 | NA          | NA |

|               |             |              |             |             |             |    |
|---------------|-------------|--------------|-------------|-------------|-------------|----|
| ASV_16s_16363 | 0.125288911 | -0.07816957  | 3.550949972 | 0.715397514 | NA          | NA |
| ASV_16s_16364 | 0.153617312 | -0.114506409 | 3.55065034  | 0.945810819 | 0.995655967 | NA |
| ASV_16s_16365 | 0.278270169 | 0.307056631  | 3.550839688 | 1.848035664 | 0.967770363 | NA |
| ASV_16s_16366 | 0.224306956 | 0.263508121  | 3.550084664 | 0.985263255 | 0.99506277  | NA |
| ASV_16s_16367 | 0.223464721 | 0.294437705  | 3.550908365 | 1.560209951 | 0.980151685 | NA |
| ASV_16s_16368 | 0.227943298 | 0.505326068  | 3.550951009 | 1.424626086 | 0.984805023 | NA |
| ASV_16s_16369 | 0.22264726  | 0.621963398  | 3.551004392 | 1.213335341 | NA          | NA |
| ASV_16s_16370 | 0.165301157 | -0.028511812 | 3.551009838 | 0.903011078 | NA          | NA |
| ASV_16s_16371 | 0.165301157 | -0.028511812 | 3.551009838 | 0.903011078 | NA          | NA |
| ASV_16s_16372 | 0.165301157 | -0.028511812 | 3.551009838 | 0.903011078 | NA          | NA |
| ASV_16s_16373 | 0.165301157 | -0.028511812 | 3.551009838 | 0.903011078 | NA          | NA |
| ASV_16s_16374 | 0.165301157 | -0.028511812 | 3.551009838 | 0.903011078 | NA          | NA |
| ASV_16s_16375 | 0.137948577 | -0.07315788  | 3.55094958  | 0.783260099 | NA          | NA |
| ASV_16s_16376 | 0.137948577 | -0.07315788  | 3.55094958  | 0.783260099 | NA          | NA |
| ASV_16s_16377 | 0.137948577 | -0.07315788  | 3.55094958  | 0.783260099 | NA          | NA |
| ASV_16s_16378 | 0.15262437  | 0.137623746  | 3.550907481 | 0.849788263 | NA          | NA |
| ASV_16s_16379 | 0.135469871 | -0.073129966 | 3.550957502 | 0.774942022 | NA          | NA |
| ASV_16s_16380 | 0.135469871 | -0.073129966 | 3.550957502 | 0.774942022 | NA          | NA |
| ASV_16s_16381 | 0.135469871 | -0.073129966 | 3.550957502 | 0.774942022 | NA          | NA |
| ASV_16s_16382 | 0.222446905 | 0.126344443  | 3.550807995 | 1.590636849 | 0.979004922 | NA |
| ASV_16s_16383 | 0.188562745 | 0.360310376  | 3.551131813 | 0.949910654 | NA          | NA |
| ASV_16s_16384 | 0.188562745 | 0.360310376  | 3.551131813 | 0.949910654 | NA          | NA |
| ASV_16s_16385 | 0.188562745 | 0.360310376  | 3.551131813 | 0.949910654 | NA          | NA |
| ASV_16s_16386 | 0.177265291 | 0.332221744  | 3.551128602 | 0.723923811 | NA          | NA |
| ASV_16s_16387 | 0.167625765 | 0.360290032  | 3.551198414 | 0.892683803 | NA          | NA |
| ASV_16s_16388 | 0.167625765 | 0.360290032  | 3.551198414 | 0.892683803 | NA          | NA |
| ASV_16s_16389 | 0.167625765 | 0.360290032  | 3.551198414 | 0.892683803 | NA          | NA |
| ASV_16s_16390 | 0.167625765 | 0.360290032  | 3.551198414 | 0.892683803 | NA          | NA |
| ASV_16s_16391 | 0.192047343 | 0.315939728  | 3.550960666 | 0.919972162 | 0.996018305 | NA |
| ASV_16s_16392 | 0.187739925 | 0.31593974   | 3.550969177 | 0.908865815 | NA          | NA |
| ASV_16s_16393 | 0.22979091  | 0.315939647  | 3.550899654 | 1.008584333 | 0.994688868 | NA |
| ASV_16s_16394 | 0.178842838 | 0.315939766  | 3.550988059 | 0.885152635 | 0.996474754 | NA |
| ASV_16s_16395 | 0.175078687 | 0.315939778  | 3.550996621 | 0.874827057 | NA          | NA |
| ASV_16s_16396 | 0.175078687 | 0.315939778  | 3.550996621 | 0.874827057 | NA          | NA |
| ASV_16s_16397 | 0.175078687 | 0.315939778  | 3.550996621 | 0.874827057 | NA          | NA |
| ASV_16s_16398 | 0.175078687 | 0.315939778  | 3.550996621 | 0.874827057 | NA          | NA |
| ASV_16s_16399 | 0.235734891 | 0.596160955  | 3.550666631 | 0.789419307 | NA          | NA |
| ASV_16s_16400 | 0.36006543  | 0.734576503  | 3.550874837 | 1.211525173 | 0.990659108 | NA |
| ASV_16s_16401 | 0.253953632 | 1.143788254  | 3.550713594 | 0.77033278  | 0.997735061 | NA |
| ASV_16s_16402 | 0.246858283 | 1.146866439  | 3.550767809 | 0.762012809 | 0.997812577 | NA |
| ASV_16s_16403 | 0.235556649 | 1.067974645  | 3.550780172 | 0.754672633 | NA          | NA |
| ASV_16s_16404 | 0.231607589 | 0.734008214  | 3.551039691 | 0.989308774 | NA          | NA |
| ASV_16s_16405 | 0.231607589 | 0.734008214  | 3.551039691 | 0.989308774 | NA          | NA |
| ASV_16s_16406 | 0.231607589 | 0.734008214  | 3.551039691 | 0.989308774 | NA          | NA |
| ASV_16s_16407 | 0.231607589 | 0.734008214  | 3.551039691 | 0.989308774 | NA          | NA |
| ASV_16s_16408 | 0.231607589 | 0.734008214  | 3.551039691 | 0.989308774 | NA          | NA |
| ASV_16s_16409 | 0.231607589 | 0.734008214  | 3.551039691 | 0.989308774 | NA          | NA |
| ASV_16s_16410 | 0.231607589 | 0.734008214  | 3.551039691 | 0.989308774 | NA          | NA |
| ASV_16s_16411 | 0.155793886 | 0.733239588  | 3.551263273 | 0.795207279 | 0.997492557 | NA |
| ASV_16s_16412 | 0.204863876 | 0.842870426  | 3.550923569 | 0.794463643 | 0.997500044 | NA |
| ASV_16s_16413 | 0.114728131 | 0.721330479  | 3.55146522  | 0.663364944 | NA          | NA |
| ASV_16s_16414 | 0.114728131 | 0.721330479  | 3.55146522  | 0.663364944 | NA          | NA |
| ASV_16s_16415 | 0.114728131 | 0.721330479  | 3.55146522  | 0.663364944 | NA          | NA |
| ASV_16s_16416 | 0.114728131 | 0.721330479  | 3.55146522  | 0.663364944 | NA          | NA |
| ASV_16s_16417 | 0.114728131 | 0.721330479  | 3.55146522  | 0.663364944 | NA          | NA |
| ASV_16s_16418 | 0.114728131 | 0.721330479  | 3.55146522  | 0.663364944 | NA          | NA |
| ASV_16s_16419 | 0.197918362 | 0.692899493  | 3.550926529 | 0.871293172 | 0.996646498 | NA |
| ASV_16s_16420 | 0.218292251 | 0.69301797   | 3.550891783 | 0.919337296 | 0.996026952 | NA |
| ASV_16s_16421 | 0.218292251 | 0.69301797   | 3.550891783 | 0.919337296 | 0.996026952 | NA |
| ASV_16s_16422 | 0.200315505 | 0.692914626  | 3.550922089 | 0.877014782 | 0.996576273 | NA |
| ASV_16s_16423 | 0.221429606 | 0.693035474  | 3.550886999 | 0.926386048 | NA          | NA |
| ASV_16s_16424 | 0.221429606 | 0.693035474  | 3.550886999 | 0.926386048 | NA          | NA |
| ASV_16s_16425 | 0.247356113 | 0.693153493  | 3.550852085 | 0.98144042  | 0.995122398 | NA |
| ASV_16s_16426 | 0.175078687 | 0.692735837  | 3.550975011 | 0.812423285 | NA          | NA |
| ASV_16s_16427 | 0.175078687 | 0.692735837  | 3.550975011 | 0.812423285 | NA          | NA |
| ASV_16s_16428 | 0.175078687 | 0.692735837  | 3.550975011 | 0.812423285 | NA          | NA |
| ASV_16s_16429 | 0.175078687 | 0.692735837  | 3.550975011 | 0.812423285 | NA          | NA |

|               |             |              |             |             |             |    |
|---------------|-------------|--------------|-------------|-------------|-------------|----|
| ASV_16s_16430 | 0.175078687 | 0.692735837  | 3.550975011 | 0.812423285 | NA          | NA |
| ASV_16s_16431 | 0.203768546 | 0.692935833  | 3.550915868 | 0.88542284  | 0.99647135  | NA |
| ASV_16s_16432 | 0.219468501 | 0.69302406   | 3.550889998 | 0.921896982 | 0.995992015 | NA |
| ASV_16s_16433 | 0.146866377 | 0.293475527  | 3.551785878 | 0.566624114 | NA          | NA |
| ASV_16s_16434 | 0.146866377 | 0.293475527  | 3.551785878 | 0.566624114 | NA          | NA |
| ASV_16s_16435 | 0.146866377 | 0.293475527  | 3.551785878 | 0.566624114 | NA          | NA |
| ASV_16s_16436 | 0.146866377 | 0.293475527  | 3.551785878 | 0.566624114 | NA          | NA |
| ASV_16s_16437 | 0.146866377 | 0.293475527  | 3.551785878 | 0.566624114 | NA          | NA |
| ASV_16s_16438 | 0.146866377 | 0.293475527  | 3.551785878 | 0.566624114 | NA          | NA |
| ASV_16s_16439 | 0.146866377 | 0.293475527  | 3.551785878 | 0.566624114 | NA          | NA |
| ASV_16s_16440 | 0.146866377 | 0.293475527  | 3.551785878 | 0.566624114 | NA          | NA |
| ASV_16s_16441 | 0.146866377 | 0.293475527  | 3.551785878 | 0.566624114 | NA          | NA |
| ASV_16s_16442 | 0.146866377 | 0.293475527  | 3.551785878 | 0.566624114 | NA          | NA |
| ASV_16s_16443 | 0.146866377 | 0.293475527  | 3.551785878 | 0.566624114 | NA          | NA |
| ASV_16s_16444 | 0.146866377 | 0.293475527  | 3.551785878 | 0.566624114 | NA          | NA |
| ASV_16s_16445 | 0.155437916 | 0.093706983  | 3.551448007 | 0.754558826 | NA          | NA |
| ASV_16s_16446 | 0.146917713 | 0.015216264  | 3.551381768 | 0.829670915 | 0.997129229 | NA |
| ASV_16s_16447 | 0.146923417 | -0.008726755 | 3.551344746 | 0.849074719 | 0.99691028  | NA |
| ASV_16s_16448 | 0.149714484 | -0.045161127 | 3.551268614 | 0.880218713 | 0.996536535 | NA |
| ASV_16s_16449 | 0.146929121 | -0.031934529 | 3.551309696 | 0.866698766 | 0.996702202 | NA |
| ASV_16s_16450 | 0.149714484 | -0.045161127 | 3.551268614 | 0.880218713 | 0.996536535 | NA |
| ASV_16s_16451 | 0.149973403 | -0.067980671 | 3.551236177 | 0.896763948 | 0.996326543 | NA |
| ASV_16s_16452 | 0.14694053  | -0.076039758 | 3.551250003 | 0.8964661   | 0.996330394 | NA |
| ASV_16s_16453 | 0.15049124  | -0.11141325  | 3.551180203 | 0.92411446  | 0.995961588 | NA |
| ASV_16s_16454 | 0.15746724  | -0.172491723 | 3.551053882 | 0.96488956  | 0.995375207 | NA |
| ASV_16s_16455 | 0.146957642 | -0.137925365 | 3.55118146  | 0.922325209 | 0.99598615  | NA |
| ASV_16s_16456 | 0.151267997 | -0.172317804 | 3.551113615 | 0.94156167  | 0.995716959 | NA |
| ASV_16s_16457 | 0.151267997 | -0.172317804 | 3.551113615 | 0.94156167  | 0.995716959 | NA |
| ASV_16s_16458 | 0.177964417 | -0.242431972 | 3.550833111 | 1.049907706 | 0.993982784 | NA |
| ASV_16s_16459 | 0.167032835 | -0.216751093 | 3.55093894  | 1.004279151 | 0.994759212 | NA |
| ASV_16s_16460 | 0.151526916 | -0.191972877 | 3.551096047 | 0.942822629 | 0.995698917 | NA |
| ASV_16s_16461 | 0.148499747 | -0.22047964  | 3.551105293 | 0.92905047  | 0.995893322 | NA |
| ASV_16s_16462 | 0.152044753 | -0.230734568 | 3.551067783 | 0.94060584  | 0.995730602 | NA |
| ASV_16s_16463 | 0.16334855  | -0.259276553 | 3.550950809 | 0.978591739 | 0.995166528 | NA |
| ASV_16s_16464 | 0.15027225  | -0.225743459 | 3.551086769 | 0.934805319 | 0.995812795 | NA |
| ASV_16s_16465 | 0.146986162 | -0.234598472 | 3.551109216 | 0.920587859 | 0.996009908 | NA |
| ASV_16s_16466 | 0.151620704 | -0.248083906 | 3.551063854 | 0.934742882 | 0.995813674 | NA |
| ASV_16s_16467 | 0.14901188  | -0.240756196 | 3.551089974 | 0.926755146 | 0.995925159 | NA |
| ASV_16s_16468 | 0.15282151  | -0.28862291  | 3.551035856 | 0.923432476 | 0.995970961 | NA |
| ASV_16s_16469 | 0.149276503 | -0.279048331 | 3.551068811 | 0.909483611 | 0.996159604 | NA |
| ASV_16s_16470 | 0.147003274 | -0.291539364 | 3.551080831 | 0.888121396 | 0.996437237 | NA |
| ASV_16s_16471 | 0.150295066 | -0.300674809 | 3.551052123 | 0.900264407 | 0.996281081 | NA |
| ASV_16s_16472 | 0.150047556 | -0.318846688 | 3.551048053 | 0.883994654 | 0.996489317 | NA |
| ASV_16s_16473 | 0.052502961 | -0.202397486 | 3.551795355 | 0.295826665 | NA          | NA |
| ASV_16s_16474 | 0.192490058 | -0.62275715  | 3.550811278 | 0.677087028 | 0.998505662 | NA |
| ASV_16s_16475 | 0.203506344 | -0.636041264 | 3.550748426 | 0.695997385 | 0.998366302 | NA |
| ASV_16s_16476 | 0.191562767 | -0.621404365 | 3.550816094 | 0.675423278 | 0.998517528 | NA |
| ASV_16s_16477 | 0.203854601 | -0.636374217 | 3.550746264 | 0.696569336 | 0.998361958 | NA |
| ASV_16s_16478 | 0.195970536 | -0.627744771 | 3.550793391 | 0.683264061 | 0.998461049 | NA |
| ASV_16s_16479 | 0.206640656 | -0.639018552 | 3.5507292   | 0.701119604 | NA          | NA |
| ASV_16s_16480 | 0.206640656 | -0.639018552 | 3.5507292   | 0.701119604 | NA          | NA |
| ASV_16s_16481 | 0.193885176 | -0.624778629 | 3.55080411  | 0.679572851 | 0.998487813 | NA |
| ASV_16s_16482 | 0.183680792 | -0.609496632 | 3.550858311 | 0.660942299 | NA          | NA |
| ASV_16s_16483 | 0.183680792 | -0.609496632 | 3.550858311 | 0.660942299 | NA          | NA |
| ASV_16s_16484 | 0.183680792 | -0.609496632 | 3.550858311 | 0.660942299 | NA          | NA |
| ASV_16s_16485 | 0.162520195 | -0.572862216 | 3.550979061 | 0.618974337 | 0.998888383 | NA |
| ASV_16s_16486 | 0.156187455 | -0.560478673 | 3.551017886 | 0.605551794 | NA          | NA |
| ASV_16s_16487 | 0.152895663 | -0.553837189 | 3.551039111 | 0.598393723 | 0.999000546 | NA |
| ASV_16s_16488 | 0.152389233 | -0.552802182 | 3.551042442 | 0.597283535 | 0.999006598 | NA |
| ASV_16s_16489 | 0.147071723 | -0.541751931 | 3.551078462 | 0.585463134 | NA          | NA |
| ASV_16s_16490 | 0.147071723 | -0.541751931 | 3.551078462 | 0.585463134 | NA          | NA |
| ASV_16s_16491 | 0.147071723 | -0.541751931 | 3.551078462 | 0.585463134 | NA          | NA |
| ASV_16s_16492 | 0.147071723 | -0.541751931 | 3.551078462 | 0.585463134 | NA          | NA |
| ASV_16s_16493 | 0.147071723 | -0.541751931 | 3.551078462 | 0.585463134 | NA          | NA |
| ASV_16s_16494 | 0.147071723 | -0.541751931 | 3.551078462 | 0.585463134 | NA          | NA |
| ASV_16s_16495 | 0.147071723 | -0.541751931 | 3.551078462 | 0.585463134 | NA          | NA |
| ASV_16s_16496 | 0.147071723 | -0.541751931 | 3.551078462 | 0.585463134 | NA          | NA |

|               |             |              |             |             |             |    |
|---------------|-------------|--------------|-------------|-------------|-------------|----|
| ASV_16s_16497 | 0.147071723 | -0.541751931 | 3.551078462 | 0.585463134 | NA          | NA |
| ASV_16s_16498 | 0.147071723 | -0.541751931 | 3.551078462 | 0.585463134 | NA          | NA |
| ASV_16s_16499 | 0.147071723 | -0.541751931 | 3.551078462 | 0.585463134 | NA          | NA |
| ASV_16s_16500 | 0.147071723 | -0.541751931 | 3.551078462 | 0.585463134 | NA          | NA |
| ASV_16s_16501 | 0.176992254 | -0.598794175 | 3.550896403 | 0.648077208 | 0.99870366  | NA |
| ASV_16s_16502 | 0.041563382 | -0.156632039 | 3.551093514 | 0.187215846 | NA          | NA |
| ASV_16s_16503 | 0.173977022 | 0.10335      | 3.551209139 | 0.967781604 | 0.995331655 | NA |
| ASV_16s_16504 | 0.161903043 | -0.325077988 | 3.551087042 | 0.522555604 | 0.999359629 | NA |
| ASV_16s_16505 | 0.156020278 | 0.166495131  | 3.551879103 | 0.536208508 | 0.999302803 | NA |
| ASV_16s_16506 | 0.201734627 | -0.652120794 | 3.550681558 | 0.771478077 | NA          | NA |
| ASV_16s_16507 | 0.151923766 | 0.660353244  | 3.551729667 | 0.645211559 | NA          | NA |
| ASV_16s_16508 | 0.165602777 | 0.234710354  | 3.551032742 | 0.696926339 | 0.998359242 | NA |
| ASV_16s_16509 | 0.194952046 | -0.622755112 | 3.550654357 | 0.7981411   | 0.997462878 | NA |
| ASV_16s_16510 | 0.186678377 | 0.698445526  | 3.551519916 | 0.876993249 | NA          | NA |
| ASV_16s_16511 | 0.194542714 | -0.900408716 | 3.550613125 | 0.514737361 | NA          | NA |
| ASV_16s_16512 | 0.180410067 | -0.567506215 | 3.550732436 | 0.793835706 | NA          | NA |
| ASV_16s_16513 | 0.205272658 | -0.613018813 | 3.550524017 | 0.878031406 | 0.996563696 | NA |
| ASV_16s_16514 | 0.195965564 | -0.576607597 | 3.550588402 | 0.86779978  | 0.996688909 | NA |
| ASV_16s_16515 | 0.15242248  | 0.315628822  | 3.552007176 | 0.363868353 | 0.999808208 | NA |
| ASV_16s_16516 | 0.194730678 | -0.53631706  | 3.550597692 | 0.891980166 | 0.996388086 | NA |
| ASV_16s_16517 | 0.190668929 | -0.502731846 | 3.550637302 | 0.89004396  | 0.996412803 | NA |
| ASV_16s_16518 | 0.190694313 | -0.486709189 | 3.550641541 | 0.896481627 | 0.996330194 | NA |
| ASV_16s_16519 | 0.195309998 | -0.507467943 | 3.550606948 | 0.909792202 | 0.996155494 | NA |
| ASV_16s_16520 | 0.192671135 | 0.307158027  | 3.551422356 | 0.566516017 | 0.999164648 | NA |
| ASV_16s_16521 | 0.207721342 | -0.529289137 | 3.550521365 | 0.95862232  | 0.995468687 | NA |
| ASV_16s_16522 | 0.146918348 | -0.281406567 | 3.551022986 | 0.702546935 | NA          | NA |
| ASV_16s_16523 | 0.162975595 | -0.560596951 | 3.550463075 | 0.658110311 | NA          | NA |
| ASV_16s_16524 | 0.168822736 | -0.344928257 | 3.551608187 | 0.646393219 | NA          | NA |
| ASV_16s_16525 | 0.194203141 | -0.109013268 | 3.550919787 | 0.932427994 | NA          | NA |
| ASV_16s_16526 | 0.154933246 | -0.480177895 | 3.551172717 | 0.557773343 | 0.999206241 | NA |
| ASV_16s_16527 | 0.193417478 | 0.309541733  | 3.551192749 | 0.645524592 | NA          | NA |
| ASV_16s_16528 | 0.189282112 | -0.304845887 | 3.55091569  | 0.813979554 | 0.997298656 | NA |
| ASV_16s_16529 | 0.181503211 | 0.664554391  | 3.550362096 | 0.858869554 | NA          | NA |
| ASV_16s_16530 | 0.202897111 | 0.680967452  | 3.551002815 | 0.889681514 | 0.996417417 | NA |
| ASV_16s_16531 | 0.198300361 | 0.680929498  | 3.551015343 | 0.878997746 | NA          | NA |
| ASV_16s_16532 | 0.159488903 | 0.351744012  | 3.551569364 | 0.630039586 | NA          | NA |
| ASV_16s_16533 | 0.138614574 | 0.821673791  | 3.551457672 | 0.316815295 | 0.999879708 | NA |
| ASV_16s_16534 | 0.116266302 | -0.031587867 | 3.551788732 | 0.53028448  | NA          | NA |
| ASV_16s_16535 | 0.183209067 | -0.859123265 | 3.550924341 | 0.456209527 | NA          | NA |
| ASV_16s_16536 | 0.190897476 | 0.42363052   | 3.551358476 | 0.516198289 | 0.999384982 | NA |
| ASV_16s_16537 | 0.194081813 | 0.604248575  | 3.551818844 | 0.228597242 | 0.999960283 | NA |
| ASV_16s_16538 | 0.183755361 | -0.257787241 | 3.550532001 | 0.436069108 | 0.999648541 | NA |
| ASV_16s_16539 | 0.242937381 | 0.246884399  | 3.550442042 | 1.273878431 | 0.989125222 | NA |
| ASV_16s_16540 | 0.228127057 | -0.333859314 | 3.551433917 | 0.552878015 | 0.999228908 | NA |
| ASV_16s_16541 | 0.114042079 | 0.929675985  | 3.551589588 | 0.219914225 | 0.9999652   | NA |
| ASV_16s_16542 | 0.170531569 | -0.069250474 | 3.550951171 | 0.879431588 | 0.996546325 | NA |
| ASV_16s_16543 | 0.188824668 | 1.439040477  | 3.550908959 | 0.391250977 | NA          | NA |
| ASV_16s_16544 | 0.162822802 | 1.148733592  | 3.551190185 | 0.566876821 | NA          | NA |
| ASV_16s_16545 | 0.163922668 | 0.952328338  | 3.551137299 | 0.836612535 | 0.997052109 | NA |
| ASV_16s_16546 | 0.183212361 | 1.185995981  | 3.551082745 | 0.607213277 | NA          | NA |
| ASV_16s_16547 | 0.178417003 | 1.5153017    | 3.550828394 | 0.340891908 | 0.999845995 | NA |
| ASV_16s_16548 | 0.159367609 | 0.353604374  | 3.551755164 | 0.594623275 | NA          | NA |
| ASV_16s_16549 | 0.159367609 | 0.353604374  | 3.551755164 | 0.594623275 | NA          | NA |
| ASV_16s_16550 | 0.167609806 | 0.198523175  | 3.551778883 | 0.525608668 | NA          | NA |
| ASV_16s_16551 | 0.145077337 | 0.267915674  | 3.55169875  | 0.320565183 | NA          | NA |
| ASV_16s_16552 | 0.19407372  | -0.053836811 | 3.551606621 | 0.595023247 | 0.999018842 | NA |
| ASV_16s_16553 | 0.223062702 | -0.10236507  | 3.551517447 | 0.690039144 | 0.998411106 | NA |
| ASV_16s_16554 | 0.194086244 | 1.175899328  | 3.551049808 | 0.577751197 | NA          | NA |
| ASV_16s_16555 | 0.103772329 | 0.907337669  | 3.551696686 | 0.318233418 | NA          | NA |
| ASV_16s_16556 | 0.123500378 | 0.341250503  | 3.55190335  | 0.511655624 | NA          | NA |
| ASV_16s_16557 | 0.123500378 | 0.341250503  | 3.55190335  | 0.511655624 | NA          | NA |
| ASV_16s_16558 | 0.180420547 | 0.34683313   | 3.552002404 | 0.367525524 | 0.999801657 | NA |
| ASV_16s_16559 | 0.205553484 | 0.350602052  | 3.551925992 | 0.464813109 | 0.999565395 | NA |
| ASV_16s_16560 | 0.26269806  | -0.187970986 | 3.550519186 | 1.007753902 | 0.994702484 | NA |
| ASV_16s_16561 | 0.249583111 | -0.080018597 | 3.550898373 | 0.798670454 | 0.997457498 | NA |
| ASV_16s_16562 | 0.235722518 | 0.38396952   | 3.551299272 | 0.725987688 | NA          | NA |
| ASV_16s_16563 | 0.204356201 | -0.857903084 | 3.550755005 | 0.475676409 | NA          | NA |

|               |             |              |             |             |             |    |
|---------------|-------------|--------------|-------------|-------------|-------------|----|
| ASV_16s_16564 | 0.207867002 | -0.791683976 | 3.550619677 | 0.602516275 | 0.998977858 | NA |
| ASV_16s_16565 | 0.177553166 | -0.530024915 | 3.550842834 | 0.633255073 | NA          | NA |
| ASV_16s_16566 | 0.177553166 | -0.530024915 | 3.550842834 | 0.633255073 | NA          | NA |
| ASV_16s_16567 | 0.123341212 | -0.4482592   | 3.551341797 | 0.517508326 | NA          | NA |
| ASV_16s_16568 | 0.170368224 | -0.465220862 | 3.55131957  | 0.553417088 | 0.999226434 | NA |
| ASV_16s_16569 | 0.17311277  | -0.526444329 | 3.550886182 | 0.625119147 | 0.998847287 | NA |
| ASV_16s_16570 | 0.161445817 | -0.514312526 | 3.55100074  | 0.602672184 | NA          | NA |
| ASV_16s_16571 | 0.196107739 | -0.253631472 | 3.551234512 | 0.615853215 | NA          | NA |
| ASV_16s_16572 | 0.18286897  | 1.213704012  | 3.550862668 | 0.546920033 | NA          | NA |
| ASV_16s_16573 | 0.17110434  | 1.194807184  | 3.550915637 | 0.524332661 | 0.999352417 | NA |
| ASV_16s_16574 | 0.189550581 | 0.861197839  | 3.550685181 | 0.955054356 | 0.995521356 | NA |
| ASV_16s_16575 | 0.206817106 | 0.396020747  | 3.551094432 | 0.615218821 | NA          | NA |
| ASV_16s_16576 | 0.206817106 | 0.396020747  | 3.551094432 | 0.615218821 | NA          | NA |
| ASV_16s_16577 | 0.17034683  | 0.378773324  | 3.551334144 | 0.5516463   | NA          | NA |
| ASV_16s_16578 | 0.17034683  | 0.378773324  | 3.551334144 | 0.5516463   | NA          | NA |
| ASV_16s_16579 | 0.140619297 | 0.365577027  | 3.551504658 | 0.489648629 | NA          | NA |
| ASV_16s_16580 | 0.152145095 | 0.37087003   | 3.551434596 | 0.514755681 | NA          | NA |
| ASV_16s_16581 | 0.152145095 | 0.37087003   | 3.551434596 | 0.514755681 | NA          | NA |
| ASV_16s_16582 | 0.164933583 | 0.090691075  | 3.550784363 | 0.82334318  | 0.997198366 | NA |
| ASV_16s_16583 | 0.293685225 | 0.418774903  | 3.550632441 | 0.731480841 | NA          | NA |
| ASV_16s_16584 | 0.052975625 | 0.34164366   | 3.551855043 | 0.233790733 | NA          | NA |
| ASV_16s_16585 | 0.052975625 | 0.34164366   | 3.551855043 | 0.233790733 | NA          | NA |
| ASV_16s_16586 | 0.242877842 | -0.047373638 | 3.549892049 | 1.0797016   | 0.99343838  | NA |
| ASV_16s_16587 | 0.103815272 | -0.420213037 | 3.551218605 | 0.401032989 | NA          | NA |
| ASV_16s_16588 | 0.103815272 | -0.420213037 | 3.551218605 | 0.401032989 | NA          | NA |
| ASV_16s_16589 | 0.095144463 | -0.397091174 | 3.551286028 | 0.376855965 | NA          | NA |
| ASV_16s_16590 | 0.186613862 | 1.219473743  | 3.550846991 | 0.553881408 | NA          | NA |
| ASV_16s_16591 | 0.17034683  | -0.078553994 | 3.550835327 | 0.858283527 | NA          | NA |
| ASV_16s_16592 | 0.167655729 | -0.078536717 | 3.550840454 | 0.850626266 | 0.996892316 | NA |
| ASV_16s_16593 | 0.14525668  | -0.078368383 | 3.550890456 | 0.782885761 | NA          | NA |
| ASV_16s_16594 | 0.15353735  | -0.078436264 | 3.550870283 | 0.808785324 | 0.997353259 | NA |
| ASV_16s_16595 | 0.163888187 | -0.078511588 | 3.550847913 | 0.839738534 | NA          | NA |
| ASV_16s_16596 | 0.101560431 | 0.220148348  | 3.55086154  | 0.464846681 | 0.99956529  | NA |
| ASV_16s_16597 | 0.101560431 | 0.220148348  | 3.55086154  | 0.464846681 | 0.99956529  | NA |
| ASV_16s_16598 | 0.102974253 | 0.220145392  | 3.550857644 | 0.47053906  | 0.999547365 | NA |
| ASV_16s_16599 | 0.103327708 | 0.220144548  | 3.550856685 | 0.471956349 | 0.999542825 | NA |
| ASV_16s_16600 | 0.108138576 | 0.220135254  | 3.55084427  | 0.490980325 | NA          | NA |
| ASV_16s_16601 | 0.108138576 | 0.220135254  | 3.55084427  | 0.490980325 | NA          | NA |
| ASV_16s_16602 | 0.108090588 | 0.220135224  | 3.550844387 | 0.490792862 | 0.999479501 | NA |
| ASV_16s_16603 | 0.185683133 | 0.310943695  | 3.550940314 | 0.880584835 | 0.996531975 | NA |
| ASV_16s_16604 | 0.16093102  | 0.310947312  | 3.550994197 | 0.811409074 | NA          | NA |
| ASV_16s_16605 | 0.171208236 | 1.276619765  | 3.551179167 | 0.503372019 | 0.999434041 | NA |
| ASV_16s_16606 | 0.167140571 | 1.117573395  | 3.551235603 | 0.566576117 | 0.999164357 | NA |
| ASV_16s_16607 | 0.263349224 | 0.138003124  | 3.550022027 | 1.279707354 | 0.988974403 | NA |
| ASV_16s_16608 | 0.157435426 | -0.067255199 | 3.550852776 | 0.953673303 | 0.995541637 | NA |
| ASV_16s_16609 | 0.1512029   | -0.067848387 | 3.550882719 | 0.940189284 | NA          | NA |
| ASV_16s_16610 | 0.237276318 | 0.337389782  | 3.551225385 | 0.674952595 | 0.998520874 | NA |
| ASV_16s_16611 | 0.163730246 | -0.593786775 | 3.550455345 | 0.651088012 | NA          | NA |
| ASV_16s_16612 | 0.145880389 | 0.682176089  | 3.551479055 | 0.656710106 | 0.998646697 | NA |
| ASV_16s_16613 | 0.28249634  | 1.405228791  | 3.550806888 | 0.70185347  | 0.998321455 | NA |
| ASV_16s_16614 | 0.15417601  | -0.067736295 | 3.550889438 | 0.978972156 | 0.99516065  | NA |
| ASV_16s_16615 | 0.168453819 | 0.477820479  | 3.551246812 | 0.78307777  | NA          | NA |
| ASV_16s_16616 | 0.165713933 | -0.065260019 | 3.55080593  | 1.005634148 | NA          | NA |
| ASV_16s_16617 | 0.210215757 | 0.325620529  | 3.551667296 | 0.564730848 | NA          | NA |
| ASV_16s_16618 | 0.230096063 | 0.777889704  | 3.551137613 | 0.964573803 | NA          | NA |
| ASV_16s_16619 | 0.236488025 | -0.52687321  | 3.55116226  | 0.754719654 | 0.997879067 | NA |
| ASV_16s_16620 | 0.163271528 | -0.027691079 | 3.55105883  | 0.927519581 | NA          | NA |
| ASV_16s_16621 | 0.205365405 | 0.328448112  | 3.55114409  | 0.636154529 | 0.998779659 | NA |
| ASV_16s_16622 | 0.19302785  | 0.550681522  | 3.550987048 | 0.870345115 | 0.996658042 | NA |
| ASV_16s_16623 | 0.280489224 | 0.249964426  | 3.550773262 | 1.177207779 | 0.99144225  | NA |
| ASV_16s_16624 | 0.122459839 | 0.282549596  | 3.55169134  | 0.516447751 | NA          | NA |
| ASV_16s_16625 | 0.043937899 | 0.295577496  | 3.551920976 | 0.246217851 | 0.999948845 | NA |
| ASV_16s_16626 | 0.072720769 | 0.287457698  | 3.551838411 | 0.363325991 | NA          | NA |
| ASV_16s_16627 | 0.205111859 | 0.279537491  | 3.551531208 | 0.697116614 | NA          | NA |
| ASV_16s_16628 | 0.123761433 | -0.401706179 | 3.551460134 | 0.517453936 | NA          | NA |
| ASV_16s_16629 | 0.299020213 | -0.161689892 | 3.550341256 | 1.251124954 | NA          | NA |
| ASV_16s_16630 | 0.272653057 | -0.092959846 | 3.550077895 | 1.202382254 | 0.990871943 | NA |

|               |             |              |             |             |             |    |
|---------------|-------------|--------------|-------------|-------------|-------------|----|
| ASV_16s_16631 | 0.191222585 | -0.572819019 | 3.550530882 | 0.641337205 | NA          | NA |
| ASV_16s_16632 | 0.213927259 | 1.254548651  | 3.550732682 | 0.600839605 | NA          | NA |
| ASV_16s_16633 | 0.186084207 | 1.009653583  | 3.550716355 | 0.829603264 | NA          | NA |
| ASV_16s_16634 | 0.121902724 | -0.078127857 | 3.550962015 | 0.703122013 | NA          | NA |
| ASV_16s_16635 | 0.207236745 | -0.10882045  | 3.550442481 | 1.166983201 | 0.991667339 | NA |
| ASV_16s_16636 | 0.265976092 | 0.183505837  | 3.550834515 | 1.69405817  | 0.974821967 | NA |
| ASV_16s_16637 | 0.283078302 | 0.34084083   | 3.550068981 | 1.429590236 | 0.984647656 | NA |
| ASV_16s_16638 | 0.251339907 | 0.926569828  | 3.550825871 | 1.053022233 | 0.993927273 | NA |
| ASV_16s_16639 | 0.23481782  | 0.348112564  | 3.550265943 | 1.277998558 | 0.98901875  | NA |
| ASV_16s_16640 | 0.20325863  | -0.060362154 | 3.550560593 | 1.203260526 | NA          | NA |
| ASV_16s_16641 | 0.237455464 | 0.371656982  | 3.55051229  | 1.165413018 | 0.991701574 | NA |
| ASV_16s_16642 | 0.160833558 | -0.028471217 | 3.55102339  | 0.889846195 | NA          | NA |
| ASV_16s_16643 | 0.160833558 | -0.028471217 | 3.55102339  | 0.889846195 | NA          | NA |
| ASV_16s_16644 | 0.160833558 | -0.028471217 | 3.55102339  | 0.889846195 | NA          | NA |
| ASV_16s_16645 | 0.160833558 | -0.028471217 | 3.55102339  | 0.889846195 | NA          | NA |
| ASV_16s_16646 | 0.160833558 | -0.028471217 | 3.55102339  | 0.889846195 | NA          | NA |
| ASV_16s_16647 | 0.183772809 | -0.073538462 | 3.550841421 | 0.919197294 | NA          | NA |
| ASV_16s_16648 | 0.134220237 | -0.073115587 | 3.550961633 | 0.770636615 | NA          | NA |
| ASV_16s_16649 | 0.143994439 | -0.073220563 | 3.550931424 | 0.802976108 | 0.997413463 | NA |
| ASV_16s_16650 | 0.131808523 | -0.073086917 | 3.550969773 | 0.762362961 | NA          | NA |
| ASV_16s_16651 | 0.131808523 | -0.073086917 | 3.550969773 | 0.762362961 | NA          | NA |
| ASV_16s_16652 | 0.190833967 | 0.143594298  | 3.550856936 | 1.457108548 | 0.983757524 | NA |
| ASV_16s_16653 | 0.170783274 | 0.329649485  | 3.550679995 | 1.026854034 | 0.994383633 | NA |
| ASV_16s_16654 | 0.178578224 | 0.34271875   | 3.550639713 | 1.050894156 | 0.993965237 | NA |
| ASV_16s_16655 | 0.22478448  | 0.376291879  | 3.550685059 | 1.079591592 | NA          | NA |
| ASV_16s_16656 | 0.183466454 | 0.360305843  | 3.551146669 | 0.936422757 | NA          | NA |
| ASV_16s_16657 | 0.25299547  | 0.337724313  | 3.550966285 | 0.840196442 | NA          | NA |
| ASV_16s_16658 | 0.163095339 | 0.36028495   | 3.55121509  | 0.879469338 | NA          | NA |
| ASV_16s_16659 | 0.163095339 | 0.36028495   | 3.55121509  | 0.879469338 | NA          | NA |
| ASV_16s_16660 | 0.163095339 | 0.36028495   | 3.55121509  | 0.879469338 | NA          | NA |
| ASV_16s_16661 | 0.163095339 | 0.36028495   | 3.55121509  | 0.879469338 | NA          | NA |
| ASV_16s_16662 | 0.163095339 | 0.36028495   | 3.55121509  | 0.879469338 | NA          | NA |
| ASV_16s_16663 | 0.163095339 | 0.36028495   | 3.55121509  | 0.879469338 | NA          | NA |
| ASV_16s_16664 | 0.163095339 | 0.36028495   | 3.55121509  | 0.879469338 | NA          | NA |
| ASV_16s_16665 | 0.190834289 | 0.315939747  | 3.550963051 | 0.916776773 | 0.996061703 | NA |
| ASV_16s_16666 | 0.182665873 | 0.31593977   | 3.550979744 | 0.895389408 | NA          | NA |
| ASV_16s_16667 | 0.175479765 | 0.315939793  | 3.550995716 | 0.875860955 | 0.996590511 | NA |
| ASV_16s_16668 | 0.175137569 | 0.315939794  | 3.550996509 | 0.874914425 | 0.996602162 | NA |
| ASV_16s_16669 | 0.240168469 | 0.31593953   | 3.550886232 | 1.030839638 | 0.994315591 | NA |
| ASV_16s_16670 | 0.189154564 | 0.315939613  | 3.550966391 | 0.911036795 | 0.996138888 | NA |
| ASV_16s_16671 | 0.226967533 | 0.315939665  | 3.55090355  | 1.002419283 | 0.994789416 | NA |
| ASV_16s_16672 | 0.208093966 | 0.315939704  | 3.550932088 | 0.958365416 | 0.995472492 | NA |
| ASV_16s_16673 | 0.17034683  | 0.31593981   | 3.551007943 | 0.861493178 | NA          | NA |
| ASV_16s_16674 | 0.17034683  | 0.31593981   | 3.551007943 | 0.861493178 | NA          | NA |
| ASV_16s_16675 | 0.17034683  | 0.31593981   | 3.551007943 | 0.861493178 | NA          | NA |
| ASV_16s_16676 | 0.190209041 | 0.432380976  | 3.550927403 | 1.285746291 | 0.988816796 | NA |
| ASV_16s_16677 | 0.23287321  | 0.935465342  | 3.551165189 | 0.799525445 | NA          | NA |
| ASV_16s_16678 | 0.360568677 | 0.734578036  | 3.550874438 | 1.212157941 | NA          | NA |
| ASV_16s_16679 | 0.247694723 | 1.080450223  | 3.55073137  | 0.771319984 | NA          | NA |
| ASV_16s_16680 | 0.224761885 | 1.114249881  | 3.55082347  | 0.723850404 | 0.998145694 | NA |
| ASV_16s_16681 | 0.266302376 | 0.73421452   | 3.550979618 | 1.059037838 | NA          | NA |
| ASV_16s_16682 | 0.266302376 | 0.73421452   | 3.550979618 | 1.059037838 | NA          | NA |
| ASV_16s_16683 | 0.22933353  | 1.082886656  | 3.550792241 | 0.73883758  | 0.998019207 | NA |
| ASV_16s_16684 | 0.219196056 | 1.067758775  | 3.550839695 | 0.724068161 | 0.998143896 | NA |
| ASV_16s_16685 | 0.266302376 | 0.73421452   | 3.550979618 | 1.059037838 | NA          | NA |
| ASV_16s_16686 | 0.23331129  | 0.734018849  | 3.551036357 | 0.992863725 | 0.994942834 | NA |
| ASV_16s_16687 | 0.23331129  | 0.734018849  | 3.551036357 | 0.992863725 | 0.994942834 | NA |
| ASV_16s_16688 | 0.225347924 | 0.733964162  | 3.551052516 | 0.975626318 | NA          | NA |
| ASV_16s_16689 | 0.225347924 | 0.733964162  | 3.551052516 | 0.975626318 | NA          | NA |
| ASV_16s_16690 | 0.225347924 | 0.733964162  | 3.551052516 | 0.975626318 | NA          | NA |
| ASV_16s_16691 | 0.225347924 | 0.733964162  | 3.551052516 | 0.975626318 | NA          | NA |
| ASV_16s_16692 | 0.225347924 | 0.733964162  | 3.551052516 | 0.975626318 | NA          | NA |
| ASV_16s_16693 | 0.225347924 | 0.733964162  | 3.551052516 | 0.975626318 | NA          | NA |
| ASV_16s_16694 | 0.225347924 | 0.733964162  | 3.551052516 | 0.975626318 | NA          | NA |
| ASV_16s_16695 | 0.111627371 | 0.719362204  | 3.551481941 | 0.651919529 | NA          | NA |
| ASV_16s_16696 | 0.20950056  | 0.692969844  | 3.55090597  | 0.899035887 | NA          | NA |
| ASV_16s_16697 | 0.211977419 | 0.692983853  | 3.550901861 | 0.904807792 | 0.996221532 | NA |

|               |             |              |             |             |             |    |
|---------------|-------------|--------------|-------------|-------------|-------------|----|
| ASV_16s_16698 | 0.215445022 | 0.693002933  | 3.550896265 | 0.912791496 | NA          | NA |
| ASV_16s_16699 | 0.226895238 | 0.693061824  | 3.550879    | 0.938379301 | 0.995762274 | NA |
| ASV_16s_16700 | 0.194148654 | 0.692875089  | 3.550933777 | 0.861869775 | 0.996760097 | NA |
| ASV_16s_16701 | 0.190390471 | 0.692849601  | 3.55094126  | 0.852419071 | 0.996871474 | NA |
| ASV_16s_16702 | 0.185379561 | 0.692814031  | 3.550951706 | 0.839593745 | 0.997018577 | NA |
| ASV_16s_16703 | 0.177863196 | 0.692756973  | 3.550968469 | 0.819825758 | 0.997236321 | NA |
| ASV_16s_16704 | 0.17034683  | 0.692696258  | 3.550986696 | 0.799414613 | NA          | NA |
| ASV_16s_16705 | 0.17034683  | 0.692696258  | 3.550986696 | 0.799414613 | NA          | NA |
| ASV_16s_16706 | 0.17034683  | 0.692696258  | 3.550986696 | 0.799414613 | NA          | NA |
| ASV_16s_16707 | 0.17034683  | 0.692696258  | 3.550986696 | 0.799414613 | NA          | NA |
| ASV_16s_16708 | 0.205858682 | 0.692948539  | 3.55091222  | 0.890339985 | 0.996409031 | NA |
| ASV_16s_16709 | 0.142786755 | 0.294119952  | 3.551798487 | 0.557246589 | NA          | NA |
| ASV_16s_16710 | 0.142786755 | 0.294119952  | 3.551798487 | 0.557246589 | NA          | NA |
| ASV_16s_16711 | 0.142786755 | 0.294119952  | 3.551798487 | 0.557246589 | NA          | NA |
| ASV_16s_16712 | 0.142786755 | 0.294119952  | 3.551798487 | 0.557246589 | NA          | NA |
| ASV_16s_16713 | 0.142786755 | 0.294119952  | 3.551798487 | 0.557246589 | NA          | NA |
| ASV_16s_16714 | 0.142820979 | 0.091922127  | 3.551523985 | 0.74742851  | NA          | NA |
| ASV_16s_16715 | 0.145375944 | -0.024187527 | 3.551334126 | 0.847413017 | 0.996929444 | NA |
| ASV_16s_16716 | 0.142843796 | -0.011331025 | 3.551375233 | 0.834824379 | 0.997072104 | NA |
| ASV_16s_16717 | 0.1428495   | -0.034866858 | 3.551339731 | 0.85189786  | 0.996877543 | NA |
| ASV_16s_16718 | 0.153541108 | -0.10277156  | 3.551163371 | 0.917767584 | 0.99604828  | NA |
| ASV_16s_16719 | 0.1461527   | -0.093750372 | 3.551235145 | 0.895201021 | 0.996346724 | NA |
| ASV_16s_16720 | 0.142860908 | -0.079633196 | 3.551279397 | 0.880442055 | 0.996533753 | NA |
| ASV_16s_16721 | 0.142866612 | -0.101077581 | 3.551253873 | 0.890829141 | 0.996402793 | NA |
| ASV_16s_16722 | 0.146411619 | -0.115523787 | 3.55120873  | 0.906113989 | 0.996204298 | NA |
| ASV_16s_16723 | 0.146670538 | -0.136759709 | 3.551185056 | 0.912114673 | 0.99612447  | NA |
| ASV_16s_16724 | 0.154420333 | -0.163156317 | 3.551090871 | 0.945049766 | 0.995666932 | NA |
| ASV_16s_16725 | 0.142872316 | -0.122020974 | 3.551231056 | 0.896390248 | 0.996331375 | NA |
| ASV_16s_16726 | 0.146929457 | -0.157543043 | 3.551163888 | 0.916179548 | 0.99606978  | NA |
| ASV_16s_16727 | 0.146929457 | -0.157543043 | 3.551163888 | 0.916179548 | 0.99606978  | NA |
| ASV_16s_16728 | 0.146929457 | -0.157543043 | 3.551163888 | 0.916179548 | 0.99606978  | NA |
| ASV_16s_16729 | 0.146929457 | -0.157543043 | 3.551163888 | 0.916179548 | 0.99606978  | NA |
| ASV_16s_16730 | 0.145669087 | -0.172670864 | 3.551161446 | 0.912448738 | 0.996119994 | NA |
| ASV_16s_16731 | 0.157521435 | -0.208892351 | 3.551027519 | 0.95853602  | 0.995469965 | NA |
| ASV_16s_16732 | 0.144408717 | -0.187794911 | 3.551159728 | 0.907686607 | 0.996183481 | NA |
| ASV_16s_16733 | 0.145168361 | -0.19039911  | 3.55115171  | 0.91041435  | 0.996147199 | NA |
| ASV_16s_16734 | 0.142889428 | -0.182519381 | 3.551176067 | 0.902268096 | 0.996254895 | NA |
| ASV_16s_16735 | 0.147706213 | -0.217908124 | 3.551113237 | 0.91757574  | 0.996050881 | NA |
| ASV_16s_16736 | 0.14467334  | -0.227260925 | 3.551131649 | 0.904043775 | 0.996231588 | NA |
| ASV_16s_16737 | 0.144932259 | -0.247083532 | 3.55111888  | 0.899918022 | 0.996285596 | NA |
| ASV_16s_16738 | 0.148224051 | -0.257058481 | 3.551088175 | 0.909959919 | 0.996153259 | NA |
| ASV_16s_16739 | 0.148224051 | -0.257058481 | 3.551088175 | 0.909959919 | 0.996153259 | NA |
| ASV_16s_16740 | 0.148224051 | -0.257058481 | 3.551088175 | 0.909959919 | 0.996153259 | NA |
| ASV_16s_16741 | 0.144431533 | -0.264797373 | 3.551113405 | 0.889835495 | 0.996415457 | NA |
| ASV_16s_16742 | 0.163554698 | -0.313299079 | 3.550932913 | 0.948309878 | 0.995619835 | NA |
| ASV_16s_16743 | 0.148741888 | -0.296345611 | 3.551065676 | 0.89444686  | 0.996356436 | NA |
| ASV_16s_16744 | 0.051044546 | -0.19440236  | 3.551801766 | 0.289701277 | NA          | NA |
| ASV_16s_16745 | 0.197418069 | -0.629591238 | 3.550785451 | 0.685731288 | 0.998442985 | NA |
| ASV_16s_16746 | 0.186460523 | -0.613772632 | 3.550843345 | 0.666061525 | 0.998583131 | NA |
| ASV_16s_16747 | 0.197940454 | -0.630243505 | 3.550782519 | 0.686633444 | 0.998436344 | NA |
| ASV_16s_16748 | 0.200900637 | -0.633506996 | 3.550764967 | 0.691628685 | NA          | NA |
| ASV_16s_16749 | 0.200900637 | -0.633506996 | 3.550764967 | 0.691628685 | NA          | NA |
| ASV_16s_16750 | 0.178578548 | -0.60137381  | 3.550887138 | 0.651183765 | NA          | NA |
| ASV_16s_16751 | 0.178578548 | -0.60137381  | 3.550887138 | 0.651183765 | NA          | NA |
| ASV_16s_16752 | 0.178578548 | -0.60137381  | 3.550887138 | 0.651183765 | NA          | NA |
| ASV_16s_16753 | 0.163473607 | -0.574633067 | 3.550973439 | 0.620919734 | 0.998872346 | NA |
| ASV_16s_16754 | 0.157319776 | -0.562674005 | 3.551010932 | 0.607893352 | 0.998947749 | NA |
| ASV_16s_16755 | 0.151848915 | -0.551659492 | 3.551046131 | 0.596037653 | NA          | NA |
| ASV_16s_16756 | 0.151848915 | -0.551659492 | 3.551046131 | 0.596037653 | NA          | NA |
| ASV_16s_16757 | 0.151848915 | -0.551659492 | 3.551046131 | 0.596037653 | NA          | NA |
| ASV_16s_16758 | 0.151848915 | -0.551659492 | 3.551046131 | 0.596037653 | NA          | NA |
| ASV_16s_16759 | 0.151848915 | -0.551659492 | 3.551046131 | 0.596037653 | NA          | NA |
| ASV_16s_16760 | 0.161268745 | -0.570408064 | 3.550986678 | 0.615472813 | NA          | NA |
| ASV_16s_16761 | 0.146024975 | -0.539492979 | 3.551085924 | 0.583036226 | 0.999082081 | NA |
| ASV_16s_16762 | 0.144758901 | -0.536787183 | 3.551094904 | 0.580156908 | NA          | NA |
| ASV_16s_16763 | 0.142986397 | -0.532964675 | 3.551107679 | 0.576092538 | NA          | NA |
| ASV_16s_16764 | 0.142986397 | -0.532964675 | 3.551107679 | 0.576092538 | NA          | NA |



|               |             |              |             |             |             |    |
|---------------|-------------|--------------|-------------|-------------|-------------|----|
| ASV_16s_16765 | 0.142986397 | -0.532964675 | 3.551107679 | 0.576092538 | NA          | NA |
| ASV_16s_16766 | 0.142986397 | -0.532964675 | 3.551107679 | 0.576092538 | NA          | NA |
| ASV_16s_16767 | 0.142986397 | -0.532964675 | 3.551107679 | 0.576092538 | NA          | NA |
| ASV_16s_16768 | 0.142986397 | -0.532964675 | 3.551107679 | 0.576092538 | NA          | NA |
| ASV_16s_16769 | 0.142986397 | -0.532964675 | 3.551107679 | 0.576092538 | NA          | NA |
| ASV_16s_16770 | 0.142986397 | -0.532964675 | 3.551107679 | 0.576092538 | NA          | NA |
| ASV_16s_16771 | 0.049378536 | 0.149133395  | 3.551090049 | 0.292312546 | 0.999908379 | NA |
| ASV_16s_16772 | 0.046680526 | -0.162079779 | 3.55104877  | 0.218463636 | 0.999965978 | NA |
| ASV_16s_16773 | 0.048483538 | -0.163858708 | 3.551035115 | 0.229210223 | NA          | NA |
| ASV_16s_16774 | 0.092553835 | 0.220169316  | 3.550889159 | 0.427333001 | NA          | NA |
| ASV_16s_16775 | 0.048035272 | 0.223139442  | 3.551152349 | 0.20457948  | NA          | NA |
| ASV_16s_16777 | 0.101175792 | 0.595764452  | 3.550821258 | 0.405745674 | NA          | NA |
| ASV_16s_16778 | 0.154284978 | 0.208285343  | 3.551361103 | 0.854989539 | 0.996841433 | NA |
| ASV_16s_16779 | 0.161037963 | -0.536938033 | 3.551083768 | 0.665864961 | NA          | NA |
| ASV_16s_16780 | 0.166550949 | -0.036041507 | 3.551591023 | 0.763431811 | NA          | NA |
| ASV_16s_16781 | 0.185265749 | -0.615454785 | 3.5507856   | 0.734825318 | 0.998053612 | NA |
| ASV_16s_16782 | 0.151773539 | -0.076006121 | 3.551083698 | 0.509723133 | NA          | NA |
| ASV_16s_16783 | 0.158900598 | 0.30531452   | 3.551959583 | 0.463512652 | NA          | NA |
| ASV_16s_16784 | 0.216519807 | 0.002809877  | 3.551142241 | 0.751477125 | NA          | NA |
| ASV_16s_16785 | 0.192677541 | -0.60468838  | 3.550639674 | 0.80931655  | 0.997347708 | NA |
| ASV_16s_16786 | 0.138288542 | -0.457132901 | 3.551236353 | 0.660018114 | 0.998624434 | NA |
| ASV_16s_16787 | 0.186400079 | -0.559487367 | 3.550673733 | 0.828736227 | 0.997139511 | NA |
| ASV_16s_16788 | 0.155366294 | -0.028646278 | 3.551748936 | 0.567150329 | 0.999161574 | NA |
| ASV_16s_16789 | 0.180244461 | -0.502844582 | 3.550715504 | 0.838347526 | 0.997032625 | NA |
| ASV_16s_16790 | 0.189164788 | -0.516497312 | 3.550645831 | 0.873202894 | 0.996623164 | NA |
| ASV_16s_16791 | 0.189521424 | -0.522858364 | 3.550641522 | 0.872334202 | 0.996633791 | NA |
| ASV_16s_16792 | 0.188812203 | -0.495380656 | 3.550651094 | 0.881088604 | 0.996525694 | NA |
| ASV_16s_16793 | 0.180466583 | -0.461588181 | 3.550715719 | 0.856684015 | 0.996821527 | NA |
| ASV_16s_16794 | 0.196087515 | -0.07534929  | 3.551597809 | 0.595326214 | 0.999017207 | NA |
| ASV_16s_16795 | 0.189330261 | -0.476486316 | 3.550654426 | 0.889963294 | 0.99641383  | NA |
| ASV_16s_16796 | 0.189495432 | -0.484693749 | 3.551177533 | 0.558330864 | 0.999203632 | NA |
| ASV_16s_16797 | 0.135635904 | -0.756631133 | 3.551254103 | 0.346935423 | 0.999836607 | NA |
| ASV_16s_16798 | 0.186154444 | -0.44962784  | 3.550684791 | 0.884006591 | 0.996489167 | NA |
| ASV_16s_16799 | 0.185699092 | -0.425147446 | 3.550701427 | 0.886484972 | 0.996457948 | NA |
| ASV_16s_16800 | 0.178268505 | -0.353578016 | 3.551700034 | 0.453232473 | 0.999600348 | NA |
| ASV_16s_16801 | 0.191392021 | -0.048492656 | 3.550597682 | 0.855632638 | 0.996833888 | NA |
| ASV_16s_16802 | 0.159008583 | 0.756598762  | 3.5513664   | 0.66004665  | 0.998624241 | NA |
| ASV_16s_16803 | 0.188022312 | -0.410579931 | 3.550701808 | 0.896599732 | 0.996328667 | NA |
| ASV_16s_16804 | 0.186926613 | 0.18316993   | 3.549853331 | 0.8586925   | NA          | NA |
| ASV_16s_16805 | 0.186926613 | 0.18316993   | 3.549853331 | 0.8586925   | NA          | NA |
| ASV_16s_16806 | 0.188786236 | -0.35066719  | 3.55075179  | 0.898991271 | NA          | NA |
| ASV_16s_16807 | 0.213891796 | 0.196714815  | 3.55097537  | 0.973053592 | NA          | NA |
| ASV_16s_16808 | 0.181978511 | 0.829297315  | 3.551193933 | 0.381217054 | 0.999775756 | NA |
| ASV_16s_16809 | 0.236374813 | 0.558705736  | 3.550683272 | 1.106090106 | 0.992930951 | NA |
| ASV_16s_16810 | 0.197530517 | -0.159775093 | 3.551103974 | 0.629385941 | 0.998821445 | NA |
| ASV_16s_16811 | 0.180254564 | -0.165744001 | 3.550875503 | 0.865956581 | 0.996711144 | NA |
| ASV_16s_16812 | 0.179790432 | -0.110732834 | 3.550932888 | 0.854190542 | 0.996850791 | NA |
| ASV_16s_16813 | 0.168381314 | 0.68954495   | 3.551230476 | 0.567506947 | 0.999159842 | NA |
| ASV_16s_16814 | 0.160442728 | -0.467098676 | 3.550850876 | 0.585652536 | NA          | NA |
| ASV_16s_16815 | 0.166743591 | -0.085126821 | 3.550951612 | 0.816657735 | 0.997270216 | NA |
| ASV_16s_16816 | 0.169449222 | -0.453735284 | 3.551002711 | 0.771984202 | 0.997719462 | NA |
| ASV_16s_16817 | 0.182737945 | -0.065306971 | 3.551275414 | 0.634038773 | 0.998792825 | NA |
| ASV_16s_16818 | 0.187545612 | -0.03228802  | 3.550693622 | 0.857900015 | 0.996807191 | NA |
| ASV_16s_16819 | 0.17286476  | -0.032603215 | 3.551463372 | 0.678154476 | 0.998498015 | NA |
| ASV_16s_16820 | 0.230268179 | 0.215510043  | 3.550453459 | 0.597799489 | 0.999003789 | NA |
| ASV_16s_16821 | 0.175451115 | 0.136228795  | 3.550495022 | 0.689827397 | NA          | NA |
| ASV_16s_16822 | 0.117884944 | -0.04100867  | 3.550821615 | 0.485650867 | 0.999497344 | NA |
| ASV_16s_16823 | 0.165278358 | -0.317879512 | 3.551386837 | 0.378747941 | 0.99978059  | NA |
| ASV_16s_16824 | 0.166727791 | -0.069586835 | 3.551017485 | 0.825937322 | 0.997170156 | NA |
| ASV_16s_16825 | 0.173064978 | 0.111961216  | 3.551236897 | 0.635041846 | 0.998786595 | NA |
| ASV_16s_16826 | 0.107849448 | 0.3696696    | 3.550884562 | 0.438983198 | 0.999640656 | NA |
| ASV_16s_16827 | 0.107317621 | 1.221491321  | 3.551533269 | 0.247996045 | 0.999947576 | NA |
| ASV_16s_16828 | 0.123978183 | 1.298891452  | 3.551365385 | 0.26000803  | 0.999938425 | NA |
| ASV_16s_16829 | 0.178123129 | 1.177046253  | 3.551107817 | 0.59740216  | NA          | NA |
| ASV_16s_16830 | 0.185010465 | 1.505940702  | 3.550798003 | 0.360650571 | 0.999813848 | NA |
| ASV_16s_16831 | 0.163427743 | 1.149881895  | 3.551186844 | 0.56807271  | NA          | NA |
| ASV_16s_16832 | 0.163427743 | 1.149881895  | 3.551186844 | 0.56807271  | NA          | NA |

|               |             |              |             |             |             |    |
|---------------|-------------|--------------|-------------|-------------|-------------|----|
| ASV_16s_16833 | 0.163427743 | 1.149881895  | 3.551186844 | 0.56807271  | NA          | NA |
| ASV_16s_16834 | 0.154940731 | 0.351497314  | 3.551780929 | 0.58527967  | NA          | NA |
| ASV_16s_16835 | 0.159648648 | 0.340359943  | 3.551980848 | 0.409879409 | NA          | NA |
| ASV_16s_16836 | 0.15886806  | 0.353326392  | 3.551758357 | 0.593528358 | 0.999026884 | NA |
| ASV_16s_16837 | 0.233241914 | 0.633877135  | 3.550848575 | 1.067207232 | 0.993670332 | NA |
| ASV_16s_16838 | 0.206186924 | 0.350302894  | 3.5519176   | 0.464814524 | NA          | NA |
| ASV_16s_16839 | 0.183034645 | 0.316680338  | 3.551877795 | 0.184319809 | 0.999980981 | NA |
| ASV_16s_16840 | 0.149999952 | -0.286115251 | 3.551419377 | 0.526616867 | 0.999343067 | NA |
| ASV_16s_16841 | 0.112529539 | 0.726045818  | 3.551138845 | 0.212233257 | 0.99996918  | NA |
| ASV_16s_16842 | 0.209228251 | 0.426303652  | 3.550642049 | 0.860773733 | 0.996773145 | NA |
| ASV_16s_16843 | 0.218232876 | 0.379439634  | 3.551401869 | 0.699880318 | NA          | NA |
| ASV_16s_16844 | 0.208998868 | -0.550573213 | 3.550578613 | 0.685972725 | NA          | NA |
| ASV_16s_16845 | 0.198856875 | -0.543748577 | 3.550889514 | 0.600922907 | NA          | NA |
| ASV_16s_16846 | 0.212637557 | -1.058631994 | 3.550573291 | 0.386801733 | 0.999764554 | NA |
| ASV_16s_16847 | 0.119915068 | -0.43989163  | 3.551370198 | 0.508759313 | NA          | NA |
| ASV_16s_16848 | 0.156961211 | -0.508919474 | 3.55104696  | 0.593618856 | NA          | NA |
| ASV_16s_16849 | 0.134549332 | -0.770115395 | 3.551218318 | 0.318756993 | 0.9998772   | NA |
| ASV_16s_16850 | 0.236592839 | 1.259007627  | 3.55084581  | 0.69650821  | NA          | NA |
| ASV_16s_16851 | 0.182032292 | 1.212341234  | 3.550866402 | 0.545250593 | 0.999263346 | NA |
| ASV_16s_16852 | 0.092788875 | 0.998431845  | 3.551392755 | 0.336093675 | NA          | NA |
| ASV_16s_16853 | 0.201072186 | 0.393530991  | 3.551130891 | 0.605864064 | NA          | NA |
| ASV_16s_16854 | 0.182403579 | 0.384465703  | 3.551257543 | 0.573990204 | NA          | NA |
| ASV_16s_16855 | 0.182403579 | 0.384465703  | 3.551257543 | 0.573990204 | NA          | NA |
| ASV_16s_16856 | 0.182403579 | 0.384465703  | 3.551257543 | 0.573990204 | NA          | NA |
| ASV_16s_16857 | 0.165614974 | 0.376994415  | 3.551360428 | 0.542320451 | NA          | NA |
| ASV_16s_16858 | 0.165614974 | 0.376994415  | 3.551360428 | 0.542320451 | NA          | NA |
| ASV_16s_16859 | 0.136713206 | 0.364007444  | 3.551527136 | 0.480703569 | NA          | NA |
| ASV_16s_16860 | 0.136713206 | 0.364007444  | 3.551527136 | 0.480703569 | NA          | NA |
| ASV_16s_16861 | 0.147918842 | 0.368828403  | 3.5514603   | 0.505675055 | NA          | NA |
| ASV_16s_16862 | 0.05150408  | 0.341536645  | 3.551861614 | 0.228201285 | NA          | NA |
| ASV_16s_16863 | 0.207509847 | 0.396303301  | 3.551090348 | 0.616259608 | NA          | NA |
| ASV_16s_16864 | 0.083106974 | -0.356927828 | 3.551374922 | 0.340471306 | NA          | NA |
| ASV_16s_16865 | 0.083106974 | -0.356927828 | 3.551374922 | 0.340471306 | NA          | NA |
| ASV_16s_16866 | 0.100931514 | -0.413361363 | 3.551243251 | 0.393147677 | NA          | NA |
| ASV_16s_16867 | 0.092501561 | -0.388748195 | 3.551304303 | 0.369101582 | NA          | NA |
| ASV_16s_16868 | 0.182438077 | 1.212996203  | 3.550864605 | 0.546049463 | NA          | NA |
| ASV_16s_16869 | 0.073329405 | 0.925723885  | 3.551557496 | 0.277684979 | NA          | NA |
| ASV_16s_16870 | 0.073329405 | 0.925723885  | 3.551557496 | 0.277684979 | NA          | NA |
| ASV_16s_16871 | 0.181430143 | 1.211420289  | 3.550868935 | 0.544154296 | NA          | NA |
| ASV_16s_16872 | 0.165614974 | -0.078523406 | 3.550844473 | 0.844679729 | NA          | NA |
| ASV_16s_16873 | 0.164538533 | -0.078513644 | 3.550846621 | 0.841557755 | 0.99699635  | NA |
| ASV_16s_16874 | 0.141221772 | -0.078332633 | 3.550901162 | 0.769760707 | NA          | NA |
| ASV_16s_16875 | 0.141221772 | -0.078332633 | 3.550901162 | 0.769760707 | NA          | NA |
| ASV_16s_16876 | 0.141221772 | -0.078332633 | 3.550901162 | 0.769760707 | NA          | NA |
| ASV_16s_16877 | 0.141221772 | -0.078332633 | 3.550901162 | 0.769760707 | NA          | NA |
| ASV_16s_16878 | 0.141221772 | -0.078332633 | 3.550901162 | 0.769760707 | NA          | NA |
| ASV_16s_16879 | 0.141221772 | -0.078332633 | 3.550901162 | 0.769760707 | NA          | NA |
| ASV_16s_16880 | 0.100329858 | 0.220150908  | 3.550865037 | 0.459798367 | 0.999580776 | NA |
| ASV_16s_16881 | 0.105134727 | 0.220141057  | 3.550851906 | 0.479105755 | NA          | NA |
| ASV_16s_16882 | 0.10492478  | 0.220141473  | 3.550852454 | 0.478272156 | NA          | NA |
| ASV_16s_16883 | 0.162222794 | 0.310947119  | 3.550991009 | 0.815141129 | 0.997286345 | NA |
| ASV_16s_16884 | 0.110751138 | 0.595824143  | 3.550797893 | 0.441712041 | NA          | NA |
| ASV_16s_16885 | 0.154978768 | 0.753855203  | 3.551839969 | 0.341768404 | 0.999844657 | NA |
| ASV_16s_16886 | 0.172728338 | 0.613516536  | 3.551013773 | 0.52510838  | 0.999349252 | NA |
| ASV_16s_16887 | 0.204465693 | -0.230252088 | 3.551376168 | 0.78654965  | 0.997578808 | NA |
| ASV_16s_16888 | 0.161359562 | 1.008487998  | 3.551032583 | 0.680975945 | 0.998477677 | NA |
| ASV_16s_16889 | 0.194501724 | 1.459513375  | 3.550950498 | 0.333088903 | 0.999857555 | NA |
| ASV_16s_16890 | 0.148159029 | -0.06729702  | 3.550901136 | 0.944018479 | 0.995681762 | NA |
| ASV_16s_16891 | 0.180305929 | 0.065511598  | 3.55169868  | 0.529873849 | 0.999329577 | NA |
| ASV_16s_16892 | 0.152618693 | -0.052856758 | 3.550985013 | 0.93838531  | NA          | NA |
| ASV_16s_16893 | 0.193454572 | 0.052261398  | 3.551178851 | 0.812972497 | 0.9973093   | NA |
| ASV_16s_16894 | 0.15360973  | -0.04035144  | 3.551070219 | 0.919404557 | NA          | NA |
| ASV_16s_16895 | 0.178305634 | -0.144206756 | 3.550905458 | 1.137225126 | 0.992301196 | NA |
| ASV_16s_16896 | 0.181926965 | -0.416508992 | 3.550725233 | 0.704480845 | 0.998301071 | NA |
| ASV_16s_16897 | 0.095554694 | 0.299391975  | 3.551946495 | 0.323955707 | 0.999870307 | NA |
| ASV_16s_16898 | 0.397100389 | 1.191377747  | 3.550425146 | 0.850036508 | NA          | NA |
| ASV_16s_16899 | 0.375158954 | 1.182280533  | 3.550480739 | 0.83059094  | NA          | NA |

|               |             |              |             |             |             |    |
|---------------|-------------|--------------|-------------|-------------|-------------|----|
| ASV_16s_16900 | 0.181043135 | 1.016725676  | 3.551206689 | 0.579185998 | NA          | NA |
| ASV_16s_16901 | 0.181043135 | 1.016725676  | 3.551206689 | 0.579185998 | NA          | NA |
| ASV_16s_16902 | 0.119058177 | 0.282827223  | 3.551698743 | 0.50719815  | NA          | NA |
| ASV_16s_16903 | 0.119058177 | 0.282827223  | 3.551698743 | 0.50719815  | NA          | NA |
| ASV_16s_16904 | 0.070700747 | 0.28769917   | 3.551846601 | 0.355986871 | NA          | NA |
| ASV_16s_16905 | 0.199414307 | 0.279498013  | 3.551544332 | 0.686862816 | NA          | NA |
| ASV_16s_16906 | 0.120323615 | -0.3938318   | 3.551476245 | 0.508520171 | NA          | NA |
| ASV_16s_16907 | 0.322568237 | -0.564326193 | 3.549938576 | 0.825164647 | NA          | NA |
| ASV_16s_16908 | 0.271616607 | -0.181033064 | 3.549751493 | 1.104766911 | NA          | NA |
| ASV_16s_16909 | 0.272181673 | 0.140100622  | 3.549937227 | 0.972669617 | NA          | NA |
| ASV_16s_16910 | 0.187574652 | -0.536101797 | 3.550430473 | 0.582326991 | NA          | NA |
| ASV_16s_16911 | 0.192247458 | 1.189103559  | 3.550648437 | 0.748523728 | NA          | NA |
| ASV_16s_16912 | 0.118516538 | -0.078085441 | 3.550974743 | 0.690594177 | NA          | NA |
| ASV_16s_16913 | 0.118516538 | -0.078085441 | 3.550974743 | 0.690594177 | NA          | NA |
| ASV_16s_16914 | 0.118516538 | -0.078085441 | 3.550974743 | 0.690594177 | NA          | NA |
| ASV_16s_16915 | 0.270784079 | -0.029082766 | 3.550819611 | 1.146327386 | 0.992110655 | NA |
| ASV_16s_16916 | 0.18042122  | -0.028633471 | 3.550969117 | 0.942287064 | 0.995706586 | NA |
| ASV_16s_16917 | 0.156365959 | -0.028427077 | 3.551037711 | 0.876407861 | NA          | NA |
| ASV_16s_16918 | 0.156365959 | -0.028427077 | 3.551037711 | 0.876407861 | NA          | NA |
| ASV_16s_16919 | 0.161742157 | 0.056499589  | 3.551016267 | 1.034434496 | NA          | NA |
| ASV_16s_16920 | 0.174569781 | 0.332127087  | 3.550648166 | 1.031712858 | NA          | NA |
| ASV_16s_16921 | 0.178668009 | -0.073505677 | 3.550850762 | 0.905427874 | NA          | NA |
| ASV_16s_16922 | 0.202920159 | 0.343047617  | 3.550480832 | 1.113923414 | 0.992775697 | NA |
| ASV_16s_16923 | 0.196681589 | 0.294283626  | 3.550243552 | 1.072455773 | 0.993573541 | NA |
| ASV_16s_16924 | 0.218744819 | 0.308635935  | 3.55032475  | 1.106668349 | 0.992919563 | NA |
| ASV_16s_16925 | 0.190343713 | 0.312304775  | 3.550579151 | 1.087527409 | 0.99329039  | NA |
| ASV_16s_16926 | 0.128147175 | -0.073039984 | 3.550982739 | 0.749544466 | NA          | NA |
| ASV_16s_16927 | 0.218187848 | 0.196975593  | 3.550805492 | 1.73933304  | 0.972851197 | NA |
| ASV_16s_16928 | 0.217961372 | 0.337034124  | 3.550363858 | 1.186440316 | 0.991235762 | NA |
| ASV_16s_16929 | 0.201356738 | 0.333498697  | 3.550454519 | 1.133032124 | 0.992387986 | NA |
| ASV_16s_16930 | 0.158999988 | -0.073359161 | 3.550892234 | 0.849411545 | NA          | NA |
| ASV_16s_16931 | 0.178370164 | 0.360300986  | 3.551162367 | 0.922610785 | NA          | NA |
| ASV_16s_16932 | 0.178370164 | 0.360300986  | 3.551162367 | 0.922610785 | NA          | NA |
| ASV_16s_16933 | 0.178370164 | 0.360300986  | 3.551162367 | 0.922610785 | NA          | NA |
| ASV_16s_16934 | 0.178370164 | 0.360300986  | 3.551162367 | 0.922610785 | NA          | NA |
| ASV_16s_16935 | 0.158564913 | 0.36027958   | 3.551232711 | 0.865956995 | NA          | NA |
| ASV_16s_16936 | 0.158564913 | 0.36027958   | 3.551232711 | 0.865956995 | NA          | NA |
| ASV_16s_16937 | 0.158564913 | 0.36027958   | 3.551232711 | 0.865956995 | NA          | NA |
| ASV_16s_16938 | 0.158564913 | 0.36027958   | 3.551232711 | 0.865956995 | NA          | NA |
| ASV_16s_16939 | 0.158564913 | 0.36027958   | 3.551232711 | 0.865956995 | NA          | NA |
| ASV_16s_16940 | 0.158564913 | 0.36027958   | 3.551232711 | 0.865956995 | NA          | NA |
| ASV_16s_16941 | 0.186102432 | 0.315939774  | 3.550972574 | 0.904392315 | 0.996227003 | NA |
| ASV_16s_16942 | 0.177569681 | 0.31593967   | 3.550990969 | 0.881508679 | 0.996520451 | NA |
| ASV_16s_16943 | 0.177591821 | 0.315939801  | 3.550990913 | 0.881594273 | NA          | NA |
| ASV_16s_16944 | 0.173143277 | 0.315939816  | 3.551001219 | 0.869289054 | 0.996670871 | NA |
| ASV_16s_16945 | 0.170063517 | 0.315939826  | 3.551008666 | 0.86060972  | 0.996775094 | NA |
| ASV_16s_16946 | 0.16903693  | 0.31593983   | 3.551011208 | 0.857688047 | 0.996809693 | NA |
| ASV_16s_16947 | 0.193925325 | 0.315939752  | 3.55095716  | 0.922757623 | 0.995980223 | NA |
| ASV_16s_16948 | 0.165614974 | 0.315939843  | 3.551019908 | 0.847862128 | NA          | NA |
| ASV_16s_16949 | 0.165614974 | 0.315939843  | 3.551019908 | 0.847862128 | NA          | NA |
| ASV_16s_16950 | 0.165614974 | 0.315939843  | 3.551019908 | 0.847862128 | NA          | NA |
| ASV_16s_16951 | 0.165614974 | 0.315939843  | 3.551019908 | 0.847862128 | NA          | NA |
| ASV_16s_16952 | 0.165614974 | 0.315939843  | 3.551019908 | 0.847862128 | NA          | NA |
| ASV_16s_16953 | 0.165614974 | 0.315939843  | 3.551019908 | 0.847862128 | NA          | NA |
| ASV_16s_16954 | 0.165614974 | 0.315939843  | 3.551019908 | 0.847862128 | NA          | NA |
| ASV_16s_16955 | 0.236616105 | 0.315939559  | 3.550890753 | 1.027146413 | 0.99437866  | NA |
| ASV_16s_16956 | 0.222992464 | 0.596143919  | 3.550673306 | 0.761690873 | NA          | NA |
| ASV_16s_16957 | 0.222992464 | 0.596143919  | 3.550673306 | 0.761690873 | NA          | NA |
| ASV_16s_16958 | 0.157721273 | 0.687567781  | 3.550974801 | 0.738823088 | NA          | NA |
| ASV_16s_16959 | 0.284934511 | 0.68815432   | 3.550787772 | 1.027646449 | NA          | NA |
| ASV_16s_16960 | 0.23225751  | 1.123314866  | 3.551039359 | 0.757511393 | NA          | NA |
| ASV_16s_16961 | 0.237290238 | 0.734045389  | 3.551028715 | 1.001191491 | 0.994809293 | NA |
| ASV_16s_16962 | 0.208854354 | 0.929082364  | 3.550925295 | 0.757479936 | 0.997854061 | NA |
| ASV_16s_16963 | 0.21908826  | 0.733916696  | 3.551066069 | 0.961602009 | NA          | NA |
| ASV_16s_16964 | 0.21908826  | 0.733916696  | 3.551066069 | 0.961602009 | NA          | NA |
| ASV_16s_16965 | 0.21908826  | 0.733916696  | 3.551066069 | 0.961602009 | NA          | NA |
| ASV_16s_16966 | 0.21908826  | 0.733916696  | 3.551066069 | 0.961602009 | NA          | NA |

|               |             |              |             |             |             |    |
|---------------|-------------|--------------|-------------|-------------|-------------|----|
| ASV_16s_16967 | 0.21908826  | 0.733916696  | 3.551066069 | 0.961602009 | NA          | NA |
| ASV_16s_16968 | 0.21908826  | 0.733916696  | 3.551066069 | 0.961602009 | NA          | NA |
| ASV_16s_16969 | 0.21908826  | 0.733916696  | 3.551066069 | 0.961602009 | NA          | NA |
| ASV_16s_16970 | 0.21908826  | 0.733916696  | 3.551066069 | 0.961602009 | NA          | NA |
| ASV_16s_16971 | 0.21908826  | 0.733916696  | 3.551066069 | 0.961602009 | NA          | NA |
| ASV_16s_16972 | 0.21908826  | 0.733916696  | 3.551066069 | 0.961602009 | NA          | NA |
| ASV_16s_16973 | 0.21908826  | 0.733916696  | 3.551066069 | 0.961602009 | NA          | NA |
| ASV_16s_16974 | 0.21908826  | 0.733916696  | 3.551066069 | 0.961602009 | NA          | NA |
| ASV_16s_16975 | 0.10852661  | 0.716574841  | 3.551495966 | 0.640224514 | NA          | NA |
| ASV_16s_16976 | 0.10852661  | 0.716574841  | 3.551495966 | 0.640224514 | NA          | NA |
| ASV_16s_16977 | 0.2036811   | 0.69293575   | 3.550916039 | 0.88515871  | NA          | NA |
| ASV_16s_16978 | 0.2036811   | 0.69293575   | 3.550916039 | 0.88515871  | NA          | NA |
| ASV_16s_16979 | 0.2036811   | 0.69293575   | 3.550916039 | 0.88515871  | NA          | NA |
| ASV_16s_16980 | 0.205497463 | 0.692946642  | 3.550912842 | 0.889502598 | 0.996419694 | NA |
| ASV_16s_16981 | 0.206488207 | 0.692952503  | 3.550911122 | 0.891857718 | 0.996389652 | NA |
| ASV_16s_16982 | 0.199467213 | 0.69290971   | 3.550923683 | 0.874946567 | 0.996601767 | NA |
| ASV_16s_16983 | 0.189852238 | 0.692845996  | 3.550942391 | 0.85031813  | 0.996895889 | NA |
| ASV_16s_16984 | 0.209460438 | 0.692969758  | 3.550906059 | 0.898863645 | NA          | NA |
| ASV_16s_16985 | 0.209460438 | 0.692969758  | 3.550906059 | 0.898863645 | NA          | NA |
| ASV_16s_16986 | 0.209460438 | 0.692969758  | 3.550906059 | 0.898863645 | NA          | NA |
| ASV_16s_16987 | 0.209460438 | 0.692969758  | 3.550906059 | 0.898863645 | NA          | NA |
| ASV_16s_16988 | 0.209460438 | 0.692969758  | 3.550906059 | 0.898863645 | NA          | NA |
| ASV_16s_16989 | 0.209460438 | 0.692969758  | 3.550906059 | 0.898863645 | NA          | NA |
| ASV_16s_16990 | 0.185658615 | 0.69281623   | 3.550951135 | 0.840237502 | 0.997011304 | NA |
| ASV_16s_16991 | 0.165614974 | 0.69265443   | 3.550999045 | 0.78613375  | NA          | NA |
| ASV_16s_16992 | 0.165614974 | 0.69265443   | 3.550999045 | 0.78613375  | NA          | NA |
| ASV_16s_16993 | 0.165614974 | 0.69265443   | 3.550999045 | 0.78613375  | NA          | NA |
| ASV_16s_16994 | 0.165614974 | 0.69265443   | 3.550999045 | 0.78613375  | NA          | NA |
| ASV_16s_16995 | 0.165614974 | 0.69265443   | 3.550999045 | 0.78613375  | NA          | NA |
| ASV_16s_16996 | 0.150933796 | -0.280278873 | 3.550986389 | 0.718007281 | NA          | NA |
| ASV_16s_16997 | 0.138707134 | 0.294754771  | 3.551811453 | 0.547682225 | NA          | NA |
| ASV_16s_16998 | 0.138707134 | 0.294754771  | 3.551811453 | 0.547682225 | NA          | NA |
| ASV_16s_16999 | 0.138707134 | 0.294754771  | 3.551811453 | 0.547682225 | NA          | NA |
| ASV_16s_17000 | 0.138707134 | 0.294754771  | 3.551811453 | 0.547682225 | NA          | NA |
| ASV_16s_17001 | 0.138707134 | 0.294754771  | 3.551811453 | 0.547682225 | NA          | NA |
| ASV_16s_17002 | 0.138707134 | 0.294754771  | 3.551811453 | 0.547682225 | NA          | NA |
| ASV_16s_17003 | 0.138707134 | 0.294754771  | 3.551811453 | 0.547682225 | NA          | NA |
| ASV_16s_17004 | 0.138707134 | 0.294754771  | 3.551811453 | 0.547682225 | NA          | NA |
| ASV_16s_17005 | 0.138707134 | 0.294754771  | 3.551811453 | 0.547682225 | NA          | NA |
| ASV_16s_17006 | 0.138707134 | 0.294754771  | 3.551811453 | 0.547682225 | NA          | NA |
| ASV_16s_17007 | 0.138707134 | 0.294754771  | 3.551811453 | 0.547682225 | NA          | NA |
| ASV_16s_17008 | 0.140001728 | 0.110881466  | 3.551571404 | 0.715777729 | NA          | NA |
| ASV_16s_17009 | 0.140519565 | 0.052176978  | 3.551481372 | 0.768762393 | 0.997749828 | NA |
| ASV_16s_17010 | 0.140778484 | 0.024557436  | 3.551438466 | 0.792064202 | 0.9975241   | NA |
| ASV_16s_17011 | 0.13875847  | 0.010678816  | 3.551433127 | 0.801783774 | 0.997425707 | NA |
| ASV_16s_17012 | 0.141555241 | -0.051411939 | 3.551327675 | 0.849940894 | 0.99690026  | NA |
| ASV_16s_17013 | 0.14181416  | -0.074902474 | 3.551294433 | 0.865245972 | 0.99671969  | NA |
| ASV_16s_17014 | 0.14181416  | -0.074902474 | 3.551294433 | 0.865245972 | 0.99671969  | NA |
| ASV_16s_17015 | 0.142331997 | -0.119777132 | 3.551238149 | 0.884629264 | 0.996481341 | NA |
| ASV_16s_17016 | 0.161965403 | -0.203139346 | 3.55099119  | 0.973738104 | 0.995241125 | NA |
| ASV_16s_17017 | 0.142590916 | -0.141356306 | 3.551214338 | 0.889900349 | 0.996414632 | NA |
| ASV_16s_17018 | 0.152010746 | -0.174403705 | 3.551105142 | 0.929803164 | 0.995882847 | NA |
| ASV_16s_17019 | 0.142590916 | -0.141356306 | 3.551214338 | 0.889900349 | 0.996414632 | NA |
| ASV_16s_17020 | 0.153894712 | -0.18008301  | 3.551082204 | 0.937953664 | 0.995768311 | NA |
| ASV_16s_17021 | 0.138798399 | -0.147274996 | 3.551240555 | 0.877110487 | 0.99657509  | NA |
| ASV_16s_17022 | 0.143108754 | -0.183213484 | 3.55117391  | 0.894189364 | 0.996359748 | NA |
| ASV_16s_17023 | 0.143108754 | -0.183213484 | 3.55117391  | 0.894189364 | 0.996359748 | NA |
| ASV_16s_17024 | 0.14133625  | -0.176955404 | 3.551193442 | 0.887503544 | 0.996445066 | NA |
| ASV_16s_17025 | 0.144989196 | -0.209020485 | 3.551140554 | 0.899725873 | 0.996288099 | NA |
| ASV_16s_17026 | 0.158197594 | -0.282898513 | 3.550988583 | 0.935410476 | 0.995804268 | NA |
| ASV_16s_17027 | 0.140340503 | -0.232633999 | 3.551163897 | 0.876556473 | 0.996581933 | NA |
| ASV_16s_17028 | 0.141859792 | -0.237469847 | 3.551148718 | 0.881394402 | 0.996521877 | NA |
| ASV_16s_17029 | 0.156801835 | -0.27957107  | 3.551002389 | 0.930713029 | 0.995870162 | NA |
| ASV_16s_17030 | 0.142118711 | -0.257721554 | 3.551135913 | 0.87598494  | 0.996588983 | NA |
| ASV_16s_17031 | 0.162341612 | -0.3287211   | 3.5509414   | 0.926901802 | 0.995923129 | NA |
| ASV_16s_17032 | 0.138832623 | -0.267484588 | 3.551158416 | 0.856424136 | 0.996824585 | NA |
| ASV_16s_17033 | 0.15220426  | -0.305561424 | 3.551035688 | 0.896136267 | 0.996334656 | NA |

|               |             |              |             |             |             |    |
|---------------|-------------|--------------|-------------|-------------|-------------|----|
| ASV_16s_17034 | 0.144403348 | -0.284011134 | 3.551104798 | 0.874785895 | 0.996603742 | NA |
| ASV_16s_17035 | 0.144403348 | -0.284011134 | 3.551104798 | 0.874785895 | 0.996603742 | NA |
| ASV_16s_17036 | 0.162235853 | -0.346791305 | 3.550940748 | 0.912784748 | 0.996115489 | NA |
| ASV_16s_17037 | 0.14162369  | -0.295613784 | 3.551123086 | 0.852654785 | 0.996868727 | NA |
| ASV_16s_17038 | 0.145180105 | -0.344814344 | 3.551081541 | 0.831713923 | 0.997106671 | NA |
| ASV_16s_17039 | 0.141888312 | -0.336265114 | 3.551110481 | 0.82049066  | 0.997229173 | NA |
| ASV_16s_17040 | 0.141140076 | -0.374827141 | 3.551111133 | 0.777216069 | 0.997669578 | NA |
| ASV_16s_17041 | 0.142659365 | -0.378804182 | 3.551099485 | 0.78207829  | 0.997622577 | NA |
| ASV_16s_17042 | 0.185223673 | -0.520976194 | 3.55080445  | 0.810815141 | NA          | NA |
| ASV_16s_17043 | 0.04958613  | -0.18623189  | 3.5518084   | 0.283524455 | NA          | NA |
| ASV_16s_17044 | 0.04958613  | -0.18623189  | 3.5518084   | 0.283524455 | NA          | NA |
| ASV_16s_17045 | 0.04958613  | -0.18623189  | 3.5518084   | 0.283524455 | NA          | NA |
| ASV_16s_17046 | 0.04958613  | -0.18623189  | 3.5518084   | 0.283524455 | NA          | NA |
| ASV_16s_17047 | 0.202723845 | -0.635204127 | 3.550753881 | 0.692788948 | 0.998390532 | NA |
| ASV_16s_17048 | 0.181821924 | -0.6064964   | 3.550868896 | 0.657301043 | 0.998642738 | NA |
| ASV_16s_17049 | 0.192200436 | -0.622260551 | 3.550813041 | 0.676438063 | 0.998510298 | NA |
| ASV_16s_17050 | 0.173257595 | -0.592445722 | 3.550917719 | 0.640718795 | 0.998750928 | NA |
| ASV_16s_17051 | 0.193071078 | -0.623526694 | 3.550808542 | 0.677995581 | 0.998499154 | NA |
| ASV_16s_17052 | 0.17904005  | -0.602072916 | 3.550884637 | 0.651998707 | 0.998677988 | NA |
| ASV_16s_17053 | 0.170620311 | -0.587733178 | 3.550932261 | 0.635465599 | 0.998783956 | NA |
| ASV_16s_17054 | 0.195160619 | -0.62654392  | 3.550797876 | 0.681708199 | NA          | NA |
| ASV_16s_17055 | 0.195160619 | -0.62654392  | 3.550797876 | 0.681708199 | NA          | NA |
| ASV_16s_17056 | 0.173476304 | -0.592849425 | 3.55091648  | 0.641176209 | NA          | NA |
| ASV_16s_17057 | 0.173476304 | -0.592849425 | 3.55091648  | 0.641176209 | NA          | NA |
| ASV_16s_17058 | 0.173476304 | -0.592849425 | 3.55091648  | 0.641176209 | NA          | NA |
| ASV_16s_17059 | 0.191425878 | -0.621131095 | 3.550817068 | 0.675047856 | NA          | NA |
| ASV_16s_17060 | 0.147510374 | -0.542599005 | 3.551075672 | 0.586327905 | NA          | NA |
| ASV_16s_17061 | 0.147510374 | -0.542599005 | 3.551075672 | 0.586327905 | NA          | NA |
| ASV_16s_17062 | 0.147510374 | -0.542599005 | 3.551075672 | 0.586327905 | NA          | NA |
| ASV_16s_17063 | 0.147510374 | -0.542599005 | 3.551075672 | 0.586327905 | NA          | NA |
| ASV_16s_17064 | 0.153131983 | -0.55420343  | 3.551037933 | 0.59738837  | 0.999006027 | NA |
| ASV_16s_17065 | 0.141433219 | -0.529225969 | 3.551117666 | 0.572404042 | 0.999135821 | NA |
| ASV_16s_17066 | 0.138901072 | -0.522992103 | 3.551133455 | 0.566426959 | NA          | NA |
| ASV_16s_17067 | 0.138901072 | -0.522992103 | 3.551133455 | 0.566426959 | NA          | NA |
| ASV_16s_17068 | 0.138901072 | -0.522992103 | 3.551133455 | 0.566426959 | NA          | NA |
| ASV_16s_17069 | 0.138901072 | -0.522992103 | 3.551133455 | 0.566426959 | NA          | NA |
| ASV_16s_17070 | 0.138901072 | -0.522992103 | 3.551133455 | 0.566426959 | NA          | NA |
| ASV_16s_17071 | 0.04425477  | -0.159573583 | 3.55106879  | 0.203773072 | NA          | NA |
| ASV_16s_17072 | 0.061692678 | 0.220286876  | 3.551044391 | 0.280552351 | NA          | NA |
| ASV_16s_17076 | 0.154504725 | -0.375620109 | 3.551244798 | 0.719989038 | 0.998177392 | NA |
| ASV_16s_17077 | 0.171571836 | -0.190165636 | 3.551049798 | 0.609386684 | NA          | NA |
| ASV_16s_17078 | 0.154152826 | -0.125034662 | 3.55114436  | 0.503261814 | NA          | NA |
| ASV_16s_17079 | 0.166014518 | -0.716101759 | 3.551007562 | 0.509584094 | NA          | NA |
| ASV_16s_17080 | 0.144073318 | -0.177838847 | 3.551104108 | 0.629093167 | NA          | NA |
| ASV_16s_17081 | 0.154255983 | 0.121323583  | 3.551018124 | 0.818039871 | 0.997255462 | NA |
| ASV_16s_17082 | 0.187754006 | -0.614727308 | 3.550741788 | 0.756209634 | 0.997865593 | NA |
| ASV_16s_17083 | 0.189641337 | -0.619155312 | 3.55072798  | 0.760596213 | NA          | NA |
| ASV_16s_17084 | 0.180150659 | -0.581141609 | 3.550757166 | 0.760869628 | 0.997823088 | NA |
| ASV_16s_17085 | 0.169403619 | 1.01102186   | 3.550460685 | 0.472054185 | NA          | NA |
| ASV_16s_17086 | 0.252468187 | -0.891409308 | 3.550460677 | 0.640125749 | 0.998754686 | NA |
| ASV_16s_17087 | 0.14438107  | -0.101388622 | 3.551351559 | 0.693072233 | 0.998388402 | NA |
| ASV_16s_17088 | 0.184304068 | -0.536255965 | 3.550686371 | 0.83379766  | 0.997083543 | NA |
| ASV_16s_17089 | 0.147952502 | -0.049388011 | 3.550966355 | 0.720603372 | 0.998172373 | NA |
| ASV_16s_17090 | 0.169724168 | -0.040045889 | 3.550779127 | 0.800435251 | 0.997439509 | NA |
| ASV_16s_17091 | 0.178901723 | -0.479678613 | 3.550723747 | 0.83854286  | 0.997030426 | NA |
| ASV_16s_17092 | 0.184296321 | -0.480699382 | 3.550684925 | 0.863005609 | 0.99674654  | NA |
| ASV_16s_17093 | 0.151945556 | -0.381177367 | 3.551333839 | 0.541685728 | 0.999279078 | NA |
| ASV_16s_17094 | 0.180133202 | -0.39915792  | 3.55074842  | 0.863491031 | 0.996740735 | NA |
| ASV_16s_17095 | 0.205745502 | -0.414502268 | 3.551228216 | 0.525365796 | 0.999348199 | NA |
| ASV_16s_17096 | 0.168331195 | -0.330921136 | 3.551103971 | 0.879797063 | 0.996541781 | NA |
| ASV_16s_17097 | 0.160755694 | 0.429300266  | 3.551251225 | 0.582351371 | 0.999085609 | NA |
| ASV_16s_17098 | 0.182538034 | 0.486013829  | 3.551329643 | 0.806782456 | 0.997374119 | NA |
| ASV_16s_17099 | 0.149839095 | 0.620948652  | 3.551191614 | 0.725170255 | NA          | NA |
| ASV_16s_17100 | 0.181411219 | 0.267771867  | 3.550874911 | 0.730280097 | 0.998092107 | NA |
| ASV_16s_17101 | 0.166787631 | -0.224662135 | 3.550914677 | 0.818882897 | 0.997246438 | NA |
| ASV_16s_17102 | 0.208151778 | 0.254784897  | 3.551021297 | 0.947721652 | NA          | NA |
| ASV_16s_17103 | 0.178274514 | -0.113970234 | 3.55188669  | 0.478627594 | 0.999521036 | NA |

|               |             |              |             |             |             |    |
|---------------|-------------|--------------|-------------|-------------|-------------|----|
| ASV_16s_17104 | 0.172721148 | 0.205032247  | 3.550872425 | 0.785103334 | NA          | NA |
| ASV_16s_17105 | 0.174113834 | -0.110740811 | 3.550906725 | 0.840549662 | NA          | NA |
| ASV_16s_17106 | 0.163209763 | 0.685856243  | 3.551047823 | 0.496192086 | NA          | NA |
| ASV_16s_17107 | 0.175391888 | 0.265542249  | 3.550918228 | 0.806942964 | 0.997372451 | NA |
| ASV_16s_17108 | 0.168760785 | 0.664215363  | 3.550472082 | 0.787433435 | NA          | NA |
| ASV_16s_17109 | 0.166551186 | 0.311371749  | 3.551190473 | 0.647320874 | NA          | NA |
| ASV_16s_17110 | 0.17586248  | 0.695492214  | 3.551129832 | 0.62759113  | 0.998832362 | NA |
| ASV_16s_17111 | 0.176454723 | 0.428147347  | 3.550939538 | 0.802599474 | 0.997417334 | NA |
| ASV_16s_17112 | 0.200931001 | 0.789494048  | 3.550989789 | 0.766287538 | 0.997772972 | NA |
| ASV_16s_17113 | 0.190533337 | 0.951786706  | 3.551003327 | 0.499783626 | NA          | NA |
| ASV_16s_17114 | 0.196962976 | 0.425212266  | 3.551029123 | 1.043376248 | NA          | NA |
| ASV_16s_17115 | 0.180113147 | 0.471402733  | 3.551463246 | 0.742321153 | 0.99798901  | NA |
| ASV_16s_17116 | 0.186870476 | 0.639913296  | 3.550938284 | 0.833652976 | 0.997085153 | NA |
| ASV_16s_17117 | 0.209562361 | 0.338975511  | 3.552017876 | 0.322463313 | 0.999872312 | NA |
| ASV_16s_17118 | 0.138252713 | -0.284237381 | 3.551742639 | 0.550348509 | 0.999240447 | NA |
| ASV_16s_17119 | 0.173033896 | 1.167850978  | 3.551134083 | 0.587379791 | NA          | NA |
| ASV_16s_17120 | 0.158758379 | 1.140347496  | 3.551212975 | 0.558207904 | NA          | NA |
| ASV_16s_17121 | 0.187126191 | 1.466720266  | 3.550976743 | 0.412871056 | 0.999707137 | NA |
| ASV_16s_17122 | 0.150513853 | 0.349938312  | 3.551803597 | 0.575647089 | NA          | NA |
| ASV_16s_17123 | 0.150513853 | 0.349938312  | 3.551803597 | 0.575647089 | NA          | NA |
| ASV_16s_17124 | 0.150513853 | 0.349938312  | 3.551803597 | 0.575647089 | NA          | NA |
| ASV_16s_17125 | 0.132705012 | -0.295729668 | 3.55157726  | 0.4763547   | 0.999528538 | NA |
| ASV_16s_17126 | 0.14645744  | -0.072026744 | 3.551034604 | 0.74816763  | NA          | NA |
| ASV_16s_17127 | 0.177623371 | -0.076038203 | 3.551081865 | 0.853767119 | 0.996855743 | NA |
| ASV_16s_17128 | 0.26399931  | 0.390686854  | 3.551133039 | 0.763837955 | NA          | NA |
| ASV_16s_17129 | 0.157932141 | 0.352812861  | 3.551764276 | 0.591523442 | NA          | NA |
| ASV_16s_17130 | 0.211997651 | 0.377605741  | 3.551440847 | 0.690044518 | NA          | NA |
| ASV_16s_17131 | 0.211997651 | 0.377605741  | 3.551440847 | 0.690044518 | NA          | NA |
| ASV_16s_17132 | 0.19952847  | -0.500905683 | 3.551094705 | 0.542863637 | 0.999273905 | NA |
| ASV_16s_17133 | 0.187751507 | 0.367921093  | 3.551591275 | 0.649259084 | NA          | NA |
| ASV_16s_17134 | 0.195160619 | -0.542040895 | 3.550686004 | 0.663582878 | NA          | NA |
| ASV_16s_17135 | 0.174960974 | -0.527905114 | 3.550868394 | 0.62839043  | 0.998827508 | NA |
| ASV_16s_17136 | 0.23308799  | -0.562287479 | 3.550414986 | 0.721614151 | NA          | NA |
| ASV_16s_17137 | 0.167689102 | -0.521497385 | 3.550940651 | 0.614793567 | NA          | NA |
| ASV_16s_17138 | 0.167689102 | -0.521497385 | 3.550940651 | 0.614793567 | NA          | NA |
| ASV_16s_17139 | 0.165054047 | -0.822403172 | 3.551009026 | 0.40415459  | NA          | NA |
| ASV_16s_17140 | 0.116488923 | -0.431300975 | 3.551399866 | 0.499823103 | NA          | NA |
| ASV_16s_17141 | 0.116488923 | -0.431300975 | 3.551399866 | 0.499823103 | NA          | NA |
| ASV_16s_17142 | 0.090137764 | 0.989123232  | 3.551416241 | 0.328485979 | NA          | NA |
| ASV_16s_17143 | 0.090137764 | 0.989123232  | 3.551416241 | 0.328485979 | NA          | NA |
| ASV_16s_17144 | 0.090137764 | 0.989123232  | 3.551416241 | 0.328485979 | NA          | NA |
| ASV_16s_17145 | 0.154527882 | 1.16496505   | 3.550999148 | 0.490150152 | NA          | NA |
| ASV_16s_17146 | 0.240255366 | 0.409203797  | 3.550914817 | 0.665155079 | NA          | NA |
| ASV_16s_17147 | 0.177192048 | 0.381554482  | 3.551293152 | 0.564472113 | NA          | NA |
| ASV_16s_17148 | 0.184928176 | -0.215612907 | 3.550298216 | 0.92824189  | 0.995904556 | NA |
| ASV_16s_17149 | 0.132807114 | 0.362081914  | 3.551547956 | 0.471555106 | NA          | NA |
| ASV_16s_17150 | 0.132807114 | 0.362081914  | 3.551547956 | 0.471555106 | NA          | NA |
| ASV_16s_17151 | 0.132807114 | 0.362081914  | 3.551547956 | 0.471555106 | NA          | NA |
| ASV_16s_17152 | 0.132807114 | 0.362081914  | 3.551547956 | 0.471555106 | NA          | NA |
| ASV_16s_17153 | 0.22750466  | 0.404393449  | 3.550977822 | 0.646850837 | NA          | NA |
| ASV_16s_17154 | 0.211237892 | 0.676465381  | 3.550678592 | 0.966500386 | 0.995350982 | NA |
| ASV_16s_17155 | 0.14369259  | 0.366725404  | 3.551487289 | 0.496395651 | NA          | NA |
| ASV_16s_17156 | 0.14369259  | 0.366725404  | 3.551487289 | 0.496395651 | NA          | NA |
| ASV_16s_17157 | 0.050032535 | 0.341429288  | 3.551868277 | 0.222538674 | NA          | NA |
| ASV_16s_17158 | 0.080732489 | -0.348407318 | 3.551394245 | 0.332948415 | NA          | NA |
| ASV_16s_17159 | 0.080732489 | -0.348407318 | 3.551394245 | 0.332948415 | NA          | NA |
| ASV_16s_17160 | 0.080732489 | -0.348407318 | 3.551394245 | 0.332948415 | NA          | NA |
| ASV_16s_17161 | 0.080732489 | -0.348407318 | 3.551394245 | 0.332948415 | NA          | NA |
| ASV_16s_17162 | 0.080732489 | -0.348407318 | 3.551394245 | 0.332948415 | NA          | NA |
| ASV_16s_17163 | 0.115694093 | -0.447087479 | 3.551114033 | 0.426612737 | 0.999673313 | NA |
| ASV_16s_17164 | 0.165016817 | -0.514328418 | 3.55085115  | 0.445064874 | NA          | NA |
| ASV_16s_17165 | 0.154890263 | -0.512943774 | 3.550723245 | 0.521827289 | NA          | NA |
| ASV_16s_17166 | 0.098047756 | -0.405480923 | 3.551265024 | 0.385037032 | NA          | NA |
| ASV_16s_17167 | 0.098047756 | -0.405480923 | 3.551265024 | 0.385037032 | NA          | NA |
| ASV_16s_17168 | 0.160883117 | -0.078491013 | 3.550854155 | 0.830753064 | NA          | NA |
| ASV_16s_17169 | 0.137186864 | -0.078294765 | 3.550912496 | 0.75634734  | NA          | NA |
| ASV_16s_17170 | 0.137186864 | -0.078294765 | 3.550912496 | 0.75634734  | NA          | NA |

|               |             |              |             |             |             |    |
|---------------|-------------|--------------|-------------|-------------|-------------|----|
| ASV_16s_17171 | 0.137186864 | -0.078294765 | 3.550912496 | 0.75634734  | NA          | NA |
| ASV_16s_17172 | 0.137186864 | -0.078294765 | 3.550912496 | 0.75634734  | NA          | NA |
| ASV_16s_17173 | 0.137186864 | -0.078294765 | 3.550912496 | 0.75634734  | NA          | NA |
| ASV_16s_17174 | 0.137186864 | -0.078294765 | 3.550912496 | 0.75634734  | NA          | NA |
| ASV_16s_17175 | 0.137186864 | -0.078294765 | 3.550912496 | 0.75634734  | NA          | NA |
| ASV_16s_17176 | 0.137186864 | -0.078294765 | 3.550912496 | 0.75634734  | NA          | NA |
| ASV_16s_17177 | 0.137186864 | -0.078294765 | 3.550912496 | 0.75634734  | NA          | NA |
| ASV_16s_17178 | 0.137186864 | -0.078294765 | 3.550912496 | 0.75634734  | NA          | NA |
| ASV_16s_17179 | 0.137186864 | -0.078294765 | 3.550912496 | 0.75634734  | NA          | NA |
| ASV_16s_17180 | 0.142362283 | -0.078340556 | 3.550898109 | 0.773395879 | 0.997706072 | NA |
| ASV_16s_17181 | 0.102130877 | 0.220147122  | 3.550859988 | 0.467036363 | NA          | NA |
| ASV_16s_17182 | 0.102130877 | 0.220147122  | 3.550859988 | 0.467036363 | NA          | NA |
| ASV_16s_17183 | 0.102130877 | 0.220147122  | 3.550859988 | 0.467036363 | NA          | NA |
| ASV_16s_17184 | 0.102130877 | 0.220147122  | 3.550859988 | 0.467036363 | NA          | NA |
| ASV_16s_17185 | 0.102130877 | 0.220147122  | 3.550859988 | 0.467036363 | NA          | NA |
| ASV_16s_17186 | 0.101980915 | 0.220147419  | 3.550860403 | 0.466432527 | 0.999560346 | NA |
| ASV_16s_17187 | 0.101926929 | 0.220147627  | 3.550860554 | 0.466214916 | NA          | NA |
| ASV_16s_17188 | 0.199830128 | -0.134918423 | 3.55073062  | 0.776857388 | 0.99767302  | NA |
| ASV_16s_17189 | 0.240135573 | 0.603878189  | 3.551226413 | 0.808189221 | NA          | NA |
| ASV_16s_17190 | 0.190260494 | -0.570855147 | 3.550640211 | 0.486862481 | 0.999493178 | NA |
| ASV_16s_17191 | 0.147717636 | -0.067389953 | 3.550897348 | 0.898995252 | 0.996297606 | NA |
| ASV_16s_17192 | 0.142142047 | -0.067293396 | 3.550927629 | 0.878681244 | NA          | NA |
| ASV_16s_17193 | 0.143628602 | -0.067436647 | 3.550930692 | 0.915343796 | 0.996081065 | NA |
| ASV_16s_17194 | 0.143628602 | -0.067436647 | 3.550930692 | 0.915343796 | 0.996081065 | NA |
| ASV_16s_17195 | 0.229951967 | -1.049011701 | 3.55081904  | 0.437176874 | 0.999645558 | NA |
| ASV_16s_17196 | 0.144619639 | -0.066946316 | 3.550941785 | 0.924572542 | 0.995955283 | NA |
| ASV_16s_17197 | 0.154226661 | -0.078066594 | 3.551174763 | 0.742667389 | 0.997985992 | NA |
| ASV_16s_17198 | 0.149148327 | 1.381755505  | 3.551350666 | 0.298634724 | 0.999901495 | NA |
| ASV_16s_17199 | 0.168699151 | 0.072365787  | 3.550618137 | 1.150871865 | 0.992014426 | NA |
| ASV_16s_17200 | 0.151237566 | -0.064631434 | 3.550933965 | 0.94279248  | 0.995699349 | NA |
| ASV_16s_17201 | 0.139179347 | 0.084691351  | 3.551449928 | 0.703187584 | 0.998311125 | NA |
| ASV_16s_17202 | 0.148583786 | -0.048304033 | 3.551060504 | 0.910044495 | NA          | NA |
| ASV_16s_17203 | 0.185749055 | 0.356171566  | 3.551753523 | 0.58131619  | NA          | NA |
| ASV_16s_17204 | 0.19195264  | 0.364693481  | 3.551559574 | 0.641214685 | NA          | NA |
| ASV_16s_17205 | 0.150774275 | 0.352474549  | 3.551547435 | 0.707788789 | NA          | NA |
| ASV_16s_17206 | 0.145058436 | 0.913987116  | 3.55150671  | 0.48004909  | NA          | NA |
| ASV_16s_17207 | 0.221215784 | 0.85392383   | 3.550958109 | 0.760308253 | NA          | NA |
| ASV_16s_17208 | 0.148512489 | 1.158720005  | 3.551490351 | 0.45510655  | 0.999594827 | NA |
| ASV_16s_17209 | 0.171752496 | 1.001305729  | 3.551260617 | 0.561296115 | NA          | NA |
| ASV_16s_17210 | 0.171752496 | 1.001305729  | 3.551260617 | 0.561296115 | NA          | NA |
| ASV_16s_17211 | 0.272746471 | 0.279444365  | 3.551394658 | 0.800931946 | NA          | NA |
| ASV_16s_17212 | 0.193716755 | 0.279457537  | 3.551558036 | 0.676356545 | NA          | NA |
| ASV_16s_17213 | 0.193716755 | 0.279457537  | 3.551558036 | 0.676356545 | NA          | NA |
| ASV_16s_17214 | 0.135268143 | -0.427138083 | 3.551403286 | 0.545864842 | NA          | NA |
| ASV_16s_17215 | 0.13633849  | 0.936678623  | 3.551462764 | 0.486197355 | NA          | NA |
| ASV_16s_17216 | 0.265427392 | -0.052267414 | 3.54981882  | 1.012413955 | NA          | NA |
| ASV_16s_17217 | 0.239486371 | -0.293457766 | 3.550670896 | 0.897687683 | 0.996314581 | NA |
| ASV_16s_17218 | 0.182215376 | -0.533794209 | 3.550476562 | 0.573073099 | NA          | NA |
| ASV_16s_17219 | 0.202042412 | 1.240449702  | 3.55078163  | 0.581040476 | NA          | NA |
| ASV_16s_17220 | 0.202042412 | 1.240449702  | 3.55078163  | 0.581040476 | NA          | NA |
| ASV_16s_17221 | 0.202042412 | 1.240449702  | 3.55078163  | 0.581040476 | NA          | NA |
| ASV_16s_17222 | 0.189016834 | 1.139189525  | 3.550617908 | 0.776184727 | 0.997679468 | NA |
| ASV_16s_17223 | 0.205169198 | 0.744837938  | 3.550880929 | 0.888504257 | 0.996432379 | NA |
| ASV_16s_17224 | 0.115130351 | -0.078040504 | 3.550988215 | 0.67779396  | NA          | NA |
| ASV_16s_17225 | 0.115130351 | -0.078040504 | 3.550988215 | 0.67779396  | NA          | NA |
| ASV_16s_17226 | 0.154463213 | -0.067290573 | 3.550860693 | 0.935938697 | NA          | NA |
| ASV_16s_17227 | 0.315393984 | 0.005853813  | 3.550777103 | 1.471417273 | NA          | NA |
| ASV_16s_17228 | 0.26679633  | 0.34102958   | 3.550105232 | 1.37583826  | 0.986299847 | NA |
| ASV_16s_17229 | 0.239237799 | 0.30669032   | 3.550600227 | 1.207246117 | NA          | NA |
| ASV_16s_17230 | 0.267548105 | 0.148393338  | 3.550844702 | 1.863677064 | 0.966998641 | NA |
| ASV_16s_17231 | 0.231425828 | 0.429838249  | 3.550923571 | 1.533809176 | 0.981116051 | NA |
| ASV_16s_17232 | 0.167435781 | 0.195520561  | 3.550702834 | 1.006624893 | 0.994720959 | NA |
| ASV_16s_17233 | 0.151898361 | -0.028381777 | 3.55105287  | 0.86267691  | NA          | NA |
| ASV_16s_17234 | 0.155333709 | 0.326253845  | 3.550833419 | 0.953837679 | 0.995539226 | NA |
| ASV_16s_17235 | 0.173563208 | -0.073470956 | 3.550860651 | 0.89132194  | NA          | NA |
| ASV_16s_17236 | 0.173563208 | -0.073470956 | 3.550860651 | 0.89132194  | NA          | NA |
| ASV_16s_17237 | 0.126763557 | -0.073022271 | 3.550987853 | 0.744594459 | NA          | NA |

|               |             |              |             |             |             |    |
|---------------|-------------|--------------|-------------|-------------|-------------|----|
| ASV_16s_17238 | 0.126763557 | -0.073022271 | 3.550987853 | 0.744594459 | NA          | NA |
| ASV_16s_17239 | 0.126763557 | -0.073022271 | 3.550987853 | 0.744594459 | NA          | NA |
| ASV_16s_17240 | 0.124485827 | -0.072991943 | 3.550996465 | 0.736471826 | NA          | NA |
| ASV_16s_17241 | 0.124485827 | -0.072991943 | 3.550996465 | 0.736471826 | NA          | NA |
| ASV_16s_17242 | 0.124485827 | -0.072991943 | 3.550996465 | 0.736471826 | NA          | NA |
| ASV_16s_17243 | 0.124485827 | -0.072991943 | 3.550996465 | 0.736471826 | NA          | NA |
| ASV_16s_17244 | 0.124485827 | -0.072991943 | 3.550996465 | 0.736471826 | NA          | NA |
| ASV_16s_17245 | 0.154457131 | -0.073320236 | 3.550903331 | 0.835629874 | NA          | NA |
| ASV_16s_17246 | 0.173273874 | 0.360295925  | 3.551178984 | 0.908462508 | NA          | NA |
| ASV_16s_17247 | 0.173273874 | 0.360295925  | 3.551178984 | 0.908462508 | NA          | NA |
| ASV_16s_17248 | 0.173273874 | 0.360295925  | 3.551178984 | 0.908462508 | NA          | NA |
| ASV_16s_17249 | 0.173273874 | 0.360295925  | 3.551178984 | 0.908462508 | NA          | NA |
| ASV_16s_17250 | 0.231823813 | 0.360943406  | 3.551263748 | 0.784756258 | 0.997596426 | NA |
| ASV_16s_17251 | 0.251519605 | 0.714349652  | 3.550793274 | 1.084144413 | NA          | NA |
| ASV_16s_17252 | 0.154034487 | 0.36027383   | 3.551251357 | 0.852138166 | NA          | NA |
| ASV_16s_17253 | 0.154034487 | 0.36027383   | 3.551251357 | 0.852138166 | NA          | NA |
| ASV_16s_17254 | 0.154034487 | 0.36027383   | 3.551251357 | 0.852138166 | NA          | NA |
| ASV_16s_17255 | 0.154034487 | 0.36027383   | 3.551251357 | 0.852138166 | NA          | NA |
| ASV_16s_17256 | 0.154034487 | 0.36027383   | 3.551251357 | 0.852138166 | NA          | NA |
| ASV_16s_17257 | 0.154034487 | 0.36027383   | 3.551251357 | 0.852138166 | NA          | NA |
| ASV_16s_17258 | 0.154034487 | 0.36027383   | 3.551251357 | 0.852138166 | NA          | NA |
| ASV_16s_17259 | 0.154034487 | 0.36027383   | 3.551251357 | 0.852138166 | NA          | NA |
| ASV_16s_17260 | 0.154034487 | 0.36027383   | 3.551251357 | 0.852138166 | NA          | NA |
| ASV_16s_17261 | 0.154034487 | 0.36027383   | 3.551251357 | 0.852138166 | NA          | NA |
| ASV_16s_17262 | 0.198994687 | 0.646550924  | 3.551070814 | 1.237181315 | 0.990045458 | NA |
| ASV_16s_17263 | 0.175049975 | 0.320428634  | 3.551042123 | 0.800038262 | 0.997443563 | NA |
| ASV_16s_17264 | 0.218957985 | 0.676239729  | 3.551037519 | 1.176517545 | NA          | NA |
| ASV_16s_17265 | 0.185923345 | 0.315939676  | 3.550972965 | 0.903842069 | 0.996234241 | NA |
| ASV_16s_17266 | 0.187641702 | 0.315939672  | 3.55096945  | 0.908359944 | 0.996174546 | NA |
| ASV_16s_17267 | 0.183709225 | 0.315939681  | 3.550977609 | 0.896594782 | 0.996328731 | NA |
| ASV_16s_17268 | 0.171134227 | 0.315939716  | 3.551006078 | 0.863545798 | 0.996740079 | NA |
| ASV_16s_17269 | 0.1773403   | 0.606768288  | 3.550979621 | 0.940976558 | 0.995725314 | NA |
| ASV_16s_17270 | 0.170122399 | 0.31593984   | 3.551008549 | 0.860697287 | 0.996774054 | NA |
| ASV_16s_17271 | 0.16772703  | 0.315939849  | 3.551014526 | 0.853863873 | 0.996854612 | NA |
| ASV_16s_17272 | 0.16772703  | 0.315939849  | 3.551014526 | 0.853863873 | 0.996854612 | NA |
| ASV_16s_17273 | 0.167042639 | 0.315939851  | 3.551016264 | 0.851897915 | 0.996877542 | NA |
| ASV_16s_17274 | 0.164305074 | 0.315939862  | 3.551023364 | 0.843974648 | 0.99696885  | NA |
| ASV_16s_17275 | 0.189127635 | 0.315939668  | 3.550966507 | 0.910178866 | 0.99615034  | NA |
| ASV_16s_17276 | 0.160883117 | 0.315939876  | 3.551032574 | 0.833917262 | NA          | NA |
| ASV_16s_17277 | 0.160883117 | 0.315939876  | 3.551032574 | 0.833917262 | NA          | NA |
| ASV_16s_17278 | 0.160883117 | 0.315939876  | 3.551032574 | 0.833917262 | NA          | NA |
| ASV_16s_17279 | 0.160883117 | 0.315939876  | 3.551032574 | 0.833917262 | NA          | NA |
| ASV_16s_17280 | 0.160883117 | 0.315939876  | 3.551032574 | 0.833917262 | NA          | NA |
| ASV_16s_17281 | 0.160883117 | 0.315939876  | 3.551032574 | 0.833917262 | NA          | NA |
| ASV_16s_17282 | 0.160883117 | 0.315939876  | 3.551032574 | 0.833917262 | NA          | NA |
| ASV_16s_17283 | 0.177589266 | 0.315939813  | 3.550991006 | 0.87901335  | 0.99655152  | NA |
| ASV_16s_17284 | 0.174124591 | 0.465003565  | 3.550955258 | 1.2505889   | 0.989715076 | NA |
| ASV_16s_17285 | 0.160883117 | 0.507571193  | 3.550983449 | 1.190556511 | 0.991142709 | NA |
| ASV_16s_17286 | 0.153214951 | 0.687529527  | 3.550987111 | 0.72542204  | NA          | NA |
| ASV_16s_17287 | 0.276793525 | 0.688132912  | 3.550794627 | 1.012968617 | NA          | NA |
| ASV_16s_17288 | 0.233523131 | 1.156070779  | 3.550855183 | 0.726875107 | NA          | NA |
| ASV_16s_17289 | 0.208438579 | 1.095066484  | 3.550893378 | 0.695675527 | NA          | NA |
| ASV_16s_17290 | 0.171289012 | 0.733448845  | 3.551202139 | 0.835135887 | 0.997068627 | NA |
| ASV_16s_17291 | 0.212828595 | 0.733867483  | 3.551080415 | 0.947232907 | NA          | NA |
| ASV_16s_17292 | 0.212828595 | 0.733867483  | 3.551080415 | 0.947232907 | NA          | NA |
| ASV_16s_17293 | 0.173105583 | 1.001473406  | 3.551066441 | 0.645089431 | NA          | NA |
| ASV_16s_17294 | 0.201328865 | 0.856549571  | 3.550938377 | 0.775315785 | 0.997687779 | NA |
| ASV_16s_17295 | 0.212828595 | 0.733867483  | 3.551080415 | 0.947232907 | NA          | NA |
| ASV_16s_17296 | 0.212828595 | 0.733867483  | 3.551080415 | 0.947232907 | NA          | NA |
| ASV_16s_17297 | 0.212828595 | 0.733867483  | 3.551080415 | 0.947232907 | NA          | NA |
| ASV_16s_17298 | 0.212828595 | 0.733867483  | 3.551080415 | 0.947232907 | NA          | NA |
| ASV_16s_17299 | 0.225110773 | 1.046678458  | 3.550827406 | 0.740280863 | 0.998006732 | NA |
| ASV_16s_17300 | 0.10542585  | 0.713708152  | 3.551510721 | 0.628334806 | NA          | NA |
| ASV_16s_17301 | 0.10542585  | 0.713708152  | 3.551510721 | 0.628334806 | NA          | NA |
| ASV_16s_17302 | 0.10542585  | 0.713708152  | 3.551510721 | 0.628334806 | NA          | NA |
| ASV_16s_17303 | 0.10542585  | 0.713708152  | 3.551510721 | 0.628334806 | NA          | NA |
| ASV_16s_17304 | 0.199843127 | 0.692912207  | 3.550923008 | 0.875798014 | 0.996591287 | NA |



|               |             |              |             |             |             |    |
|---------------|-------------|--------------|-------------|-------------|-------------|----|
| ASV_16s_17305 | 0.176109568 | 0.692743279  | 3.55097264  | 0.81495851  | 0.997288283 | NA |
| ASV_16s_17306 | 0.184451553 | 0.692804794  | 3.550953752 | 0.837033137 | 0.997047394 | NA |
| ASV_16s_17307 | 0.203475854 | 0.692934621  | 3.550916428 | 0.884583222 | NA          | NA |
| ASV_16s_17308 | 0.203475854 | 0.692934621  | 3.550916428 | 0.884583222 | NA          | NA |
| ASV_16s_17309 | 0.203475854 | 0.692934621  | 3.550916428 | 0.884583222 | NA          | NA |
| ASV_16s_17310 | 0.203475854 | 0.692934621  | 3.550916428 | 0.884583222 | NA          | NA |
| ASV_16s_17311 | 0.179674031 | 0.692771447  | 3.55096436  | 0.824482587 | 0.997185999 | NA |
| ASV_16s_17312 | 0.160883117 | 0.692609069  | 3.551012117 | 0.772547455 | NA          | NA |
| ASV_16s_17313 | 0.160883117 | 0.692609069  | 3.551012117 | 0.772547455 | NA          | NA |
| ASV_16s_17314 | 0.160883117 | 0.692609069  | 3.551012117 | 0.772547455 | NA          | NA |
| ASV_16s_17315 | 0.189572977 | 0.692844139  | 3.550942998 | 0.848801217 | 0.99691344  | NA |
| ASV_16s_17316 | 0.236345803 | 0.693106442  | 3.550866038 | 0.958505859 | NA          | NA |
| ASV_16s_17317 | 0.235918134 | 0.69310451   | 3.550866604 | 0.957604686 | NA          | NA |
| ASV_16s_17318 | 0.134627512 | 0.295035958  | 3.551822438 | 0.537888949 | NA          | NA |
| ASV_16s_17319 | 0.134627512 | 0.295035958  | 3.551822438 | 0.537888949 | NA          | NA |
| ASV_16s_17320 | 0.134627512 | 0.295035958  | 3.551822438 | 0.537888949 | NA          | NA |
| ASV_16s_17321 | 0.134627512 | 0.295035958  | 3.551822438 | 0.537888949 | NA          | NA |
| ASV_16s_17322 | 0.134627512 | 0.295035958  | 3.551822438 | 0.537888949 | NA          | NA |
| ASV_16s_17323 | 0.134627512 | 0.295035958  | 3.551822438 | 0.537888949 | NA          | NA |
| ASV_16s_17324 | 0.134627512 | 0.295035958  | 3.551822438 | 0.537888949 | NA          | NA |
| ASV_16s_17325 | 0.134627512 | 0.295035958  | 3.551822438 | 0.537888949 | NA          | NA |
| ASV_16s_17326 | 0.136957782 | -0.004177494 | 3.551426021 | 0.798807268 | 0.997456107 | NA |
| ASV_16s_17327 | 0.150951808 | -0.071821968 | 3.551224482 | 0.873507836 | 0.996619428 | NA |
| ASV_16s_17328 | 0.14238323  | -0.055138412 | 3.551315741 | 0.843408692 | 0.996975304 | NA |
| ASV_16s_17329 | 0.137475619 | -0.054490127 | 3.551357205 | 0.834109164 | 0.997080076 | NA |
| ASV_16s_17330 | 0.134690257 | -0.040547989 | 3.551396181 | 0.820894629 | 0.997224823 | NA |
| ASV_16s_17331 | 0.137734538 | -0.078549669 | 3.551324964 | 0.847561972 | 0.996927729 | NA |
| ASV_16s_17332 | 0.136721679 | -0.073764714 | 3.551338557 | 0.842886337 | 0.996981253 | NA |
| ASV_16s_17333 | 0.137734538 | -0.078549669 | 3.551324964 | 0.847561972 | 0.996927729 | NA |
| ASV_16s_17334 | 0.137993457 | -0.101726552 | 3.551295381 | 0.856036205 | 0.996829147 | NA |
| ASV_16s_17335 | 0.137993457 | -0.101726552 | 3.551295381 | 0.856036205 | 0.996829147 | NA |
| ASV_16s_17336 | 0.137993457 | -0.101726552 | 3.551295381 | 0.856036205 | 0.996829147 | NA |
| ASV_16s_17337 | 0.138252376 | -0.124172863 | 3.551268389 | 0.862579943 | 0.996751625 | NA |
| ASV_16s_17338 | 0.149556172 | -0.166459777 | 3.551134864 | 0.912379511 | 0.996120922 | NA |
| ASV_16s_17339 | 0.138252376 | -0.124172863 | 3.551268389 | 0.862579943 | 0.996751625 | NA |
| ASV_16s_17340 | 0.134713073 | -0.130787838 | 3.551290682 | 0.851472043 | 0.996882495 | NA |
| ASV_16s_17341 | 0.134713073 | -0.130787838 | 3.551290682 | 0.851472043 | 0.996882495 | NA |
| ASV_16s_17342 | 0.138770213 | -0.167564755 | 3.551222927 | 0.869151029 | 0.996672546 | NA |
| ASV_16s_17343 | 0.138770213 | -0.167564755 | 3.551222927 | 0.869151029 | 0.996672546 | NA |
| ASV_16s_17344 | 0.138770213 | -0.167564755 | 3.551222927 | 0.869151029 | 0.996672546 | NA |
| ASV_16s_17345 | 0.138770213 | -0.167564755 | 3.551222927 | 0.869151029 | 0.996672546 | NA |
| ASV_16s_17346 | 0.134718777 | -0.152014614 | 3.551270307 | 0.853432545 | 0.996859652 | NA |
| ASV_16s_17347 | 0.139029132 | -0.188652913 | 3.551203759 | 0.86958142  | 0.996667323 | NA |
| ASV_16s_17348 | 0.137009118 | -0.201643354 | 3.551211545 | 0.86018032  | 0.996780195 | NA |
| ASV_16s_17349 | 0.137768762 | -0.204265503 | 3.551203222 | 0.862863682 | 0.996748236 | NA |
| ASV_16s_17350 | 0.134730185 | -0.193499095 | 3.551236284 | 0.852196992 | 0.996874061 | NA |
| ASV_16s_17351 | 0.13954697  | -0.230010895 | 3.551172178 | 0.865139752 | 0.996720967 | NA |
| ASV_16s_17352 | 0.14988003  | -0.261759458 | 3.551073165 | 0.900967434 | 0.996271907 | NA |
| ASV_16s_17353 | 0.139805889 | -0.250477559 | 3.551159211 | 0.860254748 | 0.996779311 | NA |
| ASV_16s_17354 | 0.139805889 | -0.250477559 | 3.551159211 | 0.860254748 | 0.996779311 | NA |
| ASV_16s_17355 | 0.151109685 | -0.283770826 | 3.551052666 | 0.897193163 | 0.996320988 | NA |
| ASV_16s_17356 | 0.13753266  | -0.263431216 | 3.551171776 | 0.845880802 | 0.996947045 | NA |
| ASV_16s_17357 | 0.134753001 | -0.274783172 | 3.551188159 | 0.826823443 | 0.997160477 | NA |
| ASV_16s_17358 | 0.145492043 | -0.325851865 | 3.551082622 | 0.846663384 | 0.996938063 | NA |
| ASV_16s_17359 | 0.134770114 | -0.336636385 | 3.551167359 | 0.776650702 | 0.997675003 | NA |
| ASV_16s_17360 | 0.141100483 | -0.354293091 | 3.551114076 | 0.798190236 | 0.997462379 | NA |
| ASV_16s_17361 | 0.048127715 | -0.177878214 | 3.551815271 | 0.277268578 | NA          | NA |
| ASV_16s_17362 | 0.048127715 | -0.177878214 | 3.551815271 | 0.277268578 | NA          | NA |
| ASV_16s_17363 | 0.048127715 | -0.177878214 | 3.551815271 | 0.277268578 | NA          | NA |
| ASV_16s_17364 | 0.194015877 | -0.624837378 | 3.550803904 | 0.678911516 | 0.998492575 | NA |
| ASV_16s_17365 | 0.183674363 | -0.609369237 | 3.55085876  | 0.660724981 | NA          | NA |
| ASV_16s_17366 | 0.187156932 | -0.614766275 | 3.550839891 | 0.667212927 | 0.99857517  | NA |
| ASV_16s_17367 | 0.157900026 | -0.563736504 | 3.55100758  | 0.608996832 | 0.998941497 | NA |
| ASV_16s_17368 | 0.187679317 | -0.615555121 | 3.55083709  | 0.668173552 | 0.998568504 | NA |
| ASV_16s_17369 | 0.189420601 | -0.618141441 | 3.550827772 | 0.671350202 | NA          | NA |
| ASV_16s_17370 | 0.189420601 | -0.618141441 | 3.550827772 | 0.671350202 | NA          | NA |
| ASV_16s_17371 | 0.180491765 | -0.604345002 | 3.550876531 | 0.654698954 | 0.998660114 | NA |

|               |             |              |             |              |             |    |
|---------------|-------------|--------------|-------------|--------------|-------------|----|
| ASV_16s_17372 | 0.177940669 | -0.600262355 | 3.550891124 | 0.64980657   | 0.99869238  | NA |
| ASV_16s_17373 | 0.168374059 | -0.583631501 | 3.550945035 | 0.630880374  | NA          | NA |
| ASV_16s_17374 | 0.168374059 | -0.583631501 | 3.550945035 | 0.630880374  | NA          | NA |
| ASV_16s_17375 | 0.159533302 | -0.566933017 | 3.550997529 | 0.612459909  | 0.998921714 | NA |
| ASV_16s_17376 | 0.143171834 | -0.533284205 | 3.551106607 | 0.576391294  | NA          | NA |
| ASV_16s_17377 | 0.143171834 | -0.533284205 | 3.551106607 | 0.576391294  | NA          | NA |
| ASV_16s_17378 | 0.143171834 | -0.533284205 | 3.551106607 | 0.576391294  | NA          | NA |
| ASV_16s_17379 | 0.143171834 | -0.533284205 | 3.551106607 | 0.576391294  | NA          | NA |
| ASV_16s_17380 | 0.139880042 | -0.525365601 | 3.551127422 | 0.56868087   | 0.999154126 | NA |
| ASV_16s_17381 | 0.139120397 | -0.523486989 | 3.551132195 | 0.566880448  | 0.999162883 | NA |
| ASV_16s_17382 | 0.137601109 | -0.519701321 | 3.551141862 | 0.563256213  | 0.999180324 | NA |
| ASV_16s_17383 | 0.137601109 | -0.519701321 | 3.551141862 | 0.563256213  | 0.999180324 | NA |
| ASV_16s_17384 | 0.137347894 | -0.519066646 | 3.551143489 | 0.562649135  | 0.999183222 | NA |
| ASV_16s_17385 | 0.134815746 | -0.512722794 | 3.55115959  | 0.556508707  | NA          | NA |
| ASV_16s_17386 | 0.134815746 | -0.512722794 | 3.55115959  | 0.556508707  | NA          | NA |
| ASV_16s_17387 | 0.134815746 | -0.512722794 | 3.55115959  | 0.556508707  | NA          | NA |
| ASV_16s_17388 | 0.134815746 | -0.512722794 | 3.55115959  | 0.556508707  | NA          | NA |
| ASV_16s_17389 | 0.134815746 | -0.512722794 | 3.55115959  | 0.556508707  | NA          | NA |
| ASV_16s_17390 | 0.134815746 | -0.512722794 | 3.55115959  | 0.556508707  | NA          | NA |
| ASV_16s_17391 | 0.134815746 | -0.512722794 | 3.55115959  | 0.556508707  | NA          | NA |
| ASV_16s_17392 | 0.134815746 | -0.512722794 | 3.55115959  | 0.556508707  | NA          | NA |
| ASV_16s_17393 | 0.050898789 | 0.041990041  | 3.550995105 | 0.316630773  | 0.999879944 | NA |
| ASV_16s_17394 | 0.038099767 | -0.152528167 | 3.551130325 | 0.165255473  | NA          | NA |
| ASV_16s_17395 | 0.087265044 | 0.220183659  | 3.550908053 | 0.404207217  | NA          | NA |
| ASV_16s_17396 | 0.087265044 | 0.220183659  | 3.550908053 | 0.404207217  | NA          | NA |
| ASV_16s_17397 | 0.045290399 | 0.224454347  | 3.551176049 | 0.188271438  | NA          | NA |
| ASV_16s_17398 | 0.045290399 | 0.224454347  | 3.551176049 | 0.188271438  | NA          | NA |
| ASV_16s_17400 | 0.114800364 | 0.687070086  | 3.551131525 | 0.57949303   | 0.999100233 | NA |
| ASV_16s_17401 | 0.143027434 | -0.153512664 | 3.551377272 | 0.762532426  | 0.997807787 | NA |
| ASV_16s_17402 | 0.006328636 | 0.407894309  | 3.55200467  | -0.030111831 | 1           | NA |
| ASV_16s_17403 | 0.157740257 | -0.545992073 | 3.551034228 | 0.645769485  | 0.99871861  | NA |
| ASV_16s_17404 | 0.179614095 | -0.593067079 | 3.550800386 | 0.735171721  | 0.998050657 | NA |
| ASV_16s_17405 | 0.175573947 | -0.569959338 | 3.550799566 | 0.744242756  | 0.997972223 | NA |
| ASV_16s_17406 | 0.179459331 | -0.581147942 | 3.550767693 | 0.75342078   | 0.997890766 | NA |
| ASV_16s_17407 | 0.14835922  | -0.222851273 | 3.551121792 | 0.685248046  | NA          | NA |
| ASV_16s_17408 | 0.142878197 | 0.307449425  | 3.551960754 | 0.420152277  | 0.999689531 | NA |
| ASV_16s_17409 | 0.158689124 | 0.211871856  | 3.551047473 | 0.858898952  | 0.996795383 | NA |
| ASV_16s_17410 | 0.17469583  | -0.55169572  | 3.550784625 | 0.761396682  | 0.997818246 | NA |
| ASV_16s_17411 | 0.174976059 | -0.518234974 | 3.551259107 | 0.632919563  | NA          | NA |
| ASV_16s_17412 | 0.167433497 | 0.085884711  | 3.551267023 | 0.484892451  | 0.99949994  | NA |
| ASV_16s_17413 | 0.161278312 | -0.102992017 | 3.550831369 | 0.737362922  | 0.998031898 | NA |
| ASV_16s_17414 | 0.164200899 | 0.681052893  | 3.551610545 | 0.794249516  | 0.997502197 | NA |
| ASV_16s_17415 | 0.174806891 | -0.537150356 | 3.550774571 | 0.777268883  | 0.99766907  | NA |
| ASV_16s_17416 | 0.167991301 | -0.346850795 | 3.551022313 | 0.670119696  | 0.998554937 | NA |
| ASV_16s_17417 | 0.147752451 | 0.866777269  | 3.551799536 | 0.556652521  | 0.99921147  | NA |
| ASV_16s_17418 | 0.171959944 | 0.67922129   | 3.551310816 | 0.794826339  | 0.997496394 | NA |
| ASV_16s_17419 | 0.173513457 | 0.404740371  | 3.551060724 | 0.894086437  | 0.996361072 | NA |
| ASV_16s_17420 | 0.1926564   | -0.509479481 | 3.551268164 | 0.615833303  | 0.998902206 | NA |
| ASV_16s_17421 | 0.169932966 | -0.519474451 | 3.550817434 | 0.768939796  | 0.997748163 | NA |
| ASV_16s_17422 | 0.13009751  | -0.68841414  | 3.551085163 | 0.354716462  | 0.999823947 | NA |
| ASV_16s_17423 | 0.228858301 | 1.163535914  | 3.550855818 | 0.677675795  | 0.998501447 | NA |
| ASV_16s_17424 | 0.180835051 | -0.528396728 | 3.550718573 | 0.819295284  | 0.997242016 | NA |
| ASV_16s_17425 | 0.19220539  | -0.131997171 | 3.551087575 | 0.855852125  | 0.99683131  | NA |
| ASV_16s_17426 | 0.18407195  | -0.503335272 | 3.550685444 | 0.850694893  | 0.99689152  | NA |
| ASV_16s_17427 | 0.187100418 | -0.549749491 | 3.550665664 | 0.853384623  | 0.996860212 | NA |
| ASV_16s_17428 | 0.123593568 | 0.316321468  | 3.552008415 | 0.323271314  | 0.999871229 | NA |
| ASV_16s_17429 | 0.177697515 | -0.453987317 | 3.55073597  | 0.838444169  | 0.997031537 | NA |
| ASV_16s_17430 | 0.152628808 | 1.024406674  | 3.551401097 | 0.504629235  | 0.999429354 | NA |
| ASV_16s_17431 | 0.175475347 | -0.416669586 | 3.550763285 | 0.837977511  | 0.997036787 | NA |
| ASV_16s_17432 | 0.147614596 | 0.035821899  | 3.550943622 | 0.706232923  | 0.998287386 | NA |
| ASV_16s_17433 | 0.165296071 | -0.410500876 | 3.550833646 | 0.800719855  | 0.9974366   | NA |
| ASV_16s_17434 | 0.176369421 | -0.129918478 | 3.550767244 | 1.004325051  | 0.994758465 | NA |
| ASV_16s_17435 | 0.172795208 | 0.141519317  | 3.550894242 | 0.829372827  | 0.997132511 | NA |
| ASV_16s_17436 | 0.184607259 | -0.424862128 | 3.550779972 | 0.898911459  | 0.996298695 | NA |
| ASV_16s_17437 | 0.155787406 | 0.603701197  | 3.551330916 | 0.373022862  | 0.99979152  | NA |
| ASV_16s_17438 | 0.197730403 | -0.300847235 | 3.551497461 | 0.693733102  | NA          | NA |
| ASV_16s_17439 | 0.177580762 | -0.350650231 | 3.55079819  | 0.850888064  | 0.996889278 | NA |

|               |             |              |             |             |             |    |
|---------------|-------------|--------------|-------------|-------------|-------------|----|
| ASV_16s_17440 | 0.175881953 | -0.096670303 | 3.550991776 | 0.852714609 | NA          | NA |
| ASV_16s_17441 | 0.184785094 | -0.021529046 | 3.55087662  | 0.842366782 | 0.996987163 | NA |
| ASV_16s_17442 | 0.134941379 | -0.032256742 | 3.551698152 | 0.56265202  | 0.999183208 | NA |
| ASV_16s_17443 | 0.178792683 | 0.367480746  | 3.551595433 | 0.434693181 | 0.999652223 | NA |
| ASV_16s_17444 | 0.207603173 | -0.006957656 | 3.256662806 | 1.521003167 | 0.98157361  | NA |
| ASV_16s_17445 | 0.201892113 | 0.254205983  | 3.551043782 | 0.92668619  | NA          | NA |
| ASV_16s_17446 | 0.166157851 | -0.033333482 | 3.551539585 | 0.63112778  | 0.998810785 | NA |
| ASV_16s_17447 | 0.172554434 | -0.00244065  | 3.550943431 | 0.824894582 | 0.997181518 | NA |
| ASV_16s_17448 | 0.163842532 | -0.00243682  | 3.550959047 | 0.79792718  | 0.99746505  | NA |
| ASV_16s_17449 | 0.18482256  | 0.929527778  | 3.550979792 | 0.557382067 | 0.999208069 | NA |
| ASV_16s_17450 | 0.160321428 | 0.054813145  | 3.551019768 | 0.805474521 | NA          | NA |
| ASV_16s_17451 | 0.186013491 | 0.428242503  | 3.550911371 | 0.832393463 | 0.997099142 | NA |
| ASV_16s_17452 | 0.176363783 | 0.141147209  | 3.551941108 | 0.40288441  | 0.999730152 | NA |
| ASV_16s_17453 | 0.194776086 | 0.534109348  | 3.550914838 | 0.846366924 | 0.996941468 | NA |
| ASV_16s_17454 | 0.175094989 | 1.436118725  | 3.55112493  | 0.347319681 | 0.999835997 | NA |
| ASV_16s_17455 | 0.188334656 | 1.453744069  | 3.551058392 | 0.392266244 | 0.999753226 | NA |
| ASV_16s_17456 | 0.160072941 | 0.936582509  | 3.551679326 | 0.583215033 | 0.999081158 | NA |
| ASV_16s_17457 | 0.165562552 | 0.971787598  | 3.551388305 | 0.536476465 | 0.999301655 | NA |
| ASV_16s_17458 | 0.234964682 | 0.277882624  | 3.551336033 | 0.724247395 | 0.998142415 | NA |
| ASV_16s_17459 | 0.240679742 | 0.451472407  | 3.551857642 | 0.568488883 | 0.999155062 | NA |
| ASV_16s_17460 | 0.233695411 | 0.278104266  | 3.551343945 | 0.722738724 | 0.998154857 | NA |
| ASV_16s_17461 | 0.156015314 | 1.134433177  | 3.551228066 | 0.552269501 | 0.999231694 | NA |
| ASV_16s_17462 | 0.154089015 | 1.130237108  | 3.551238792 | 0.548097445 | NA          | NA |
| ASV_16s_17463 | 0.154089015 | 1.130237108  | 3.551238792 | 0.548097445 | NA          | NA |
| ASV_16s_17464 | 0.19502715  | 0.695443446  | 3.551024203 | 0.983712406 | 0.995087016 | NA |
| ASV_16s_17465 | 0.146086975 | 0.348639674  | 3.551825157 | 0.565779518 | NA          | NA |
| ASV_16s_17466 | 0.146086975 | 0.348639674  | 3.551825157 | 0.565779518 | NA          | NA |
| ASV_16s_17467 | 0.146086975 | 0.348639674  | 3.551825157 | 0.565779518 | NA          | NA |
| ASV_16s_17468 | 0.164983913 | 0.315832291  | 3.551197363 | 0.613940204 | NA          | NA |
| ASV_16s_17469 | 0.19561043  | 0.37138516   | 3.551541337 | 0.662901687 | NA          | NA |
| ASV_16s_17470 | 0.19561043  | 0.37138516   | 3.551541337 | 0.662901687 | NA          | NA |
| ASV_16s_17471 | 0.192322385 | 0.351861719  | 3.551887465 | 0.363624776 | 0.999808639 | NA |
| ASV_16s_17472 | 0.11320868  | 0.337705124  | 3.551937645 | 0.484528111 | NA          | NA |
| ASV_16s_17473 | 0.11320868  | 0.337705124  | 3.551937645 | 0.484528111 | NA          | NA |
| ASV_16s_17474 | 0.11320868  | 0.337705124  | 3.551937645 | 0.484528111 | NA          | NA |
| ASV_16s_17475 | 0.11320868  | 0.337705124  | 3.551937645 | 0.484528111 | NA          | NA |
| ASV_16s_17476 | 0.153287078 | 0.350813123  | 3.551790119 | 0.581609032 | NA          | NA |
| ASV_16s_17477 | 0.214428107 | 0.352388016  | 3.551827364 | 0.387696837 | 0.999762724 | NA |
| ASV_16s_17478 | 0.170816936 | 0.066380043  | 3.551062225 | 0.932102053 | 0.995850747 | NA |
| ASV_16s_17479 | 0.202946832 | -1.028948574 | 3.550548469 | 0.362162603 | 0.999811213 | NA |
| ASV_16s_17480 | 0.19144274  | -0.058660427 | 3.550488669 | 0.93558811  | 0.995801763 | NA |
| ASV_16s_17481 | 0.189420601 | -0.538309816 | 3.55073484  | 0.653870216 | NA          | NA |
| ASV_16s_17482 | 0.113062778 | -0.422474933 | 3.551430893 | 0.490734183 | NA          | NA |
| ASV_16s_17483 | 0.149269818 | -0.844930785 | 3.551013583 | 0.30406379  | 0.999895303 | NA |
| ASV_16s_17484 | 0.167629889 | 1.188862098  | 3.550932721 | 0.517267845 | NA          | NA |
| ASV_16s_17485 | 0.170438558 | 1.193593572  | 3.550919127 | 0.522835176 | NA          | NA |
| ASV_16s_17486 | 0.188943794 | 0.284327089  | 3.550232397 | 0.945083569 | 0.995666445 | NA |
| ASV_16s_17487 | 0.149982944 | 1.155566711  | 3.551021638 | 0.480198418 | NA          | NA |
| ASV_16s_17488 | 0.149982944 | 1.155566711  | 3.551021638 | 0.480198418 | NA          | NA |
| ASV_16s_17489 | 0.206716875 | 1.246027422  | 3.550762013 | 0.588814538 | NA          | NA |
| ASV_16s_17490 | 0.171980517 | 0.379299683  | 3.551325348 | 0.554597118 | NA          | NA |
| ASV_16s_17491 | 0.171980517 | 0.379299683  | 3.551325348 | 0.554597118 | NA          | NA |
| ASV_16s_17492 | 0.156151261 | 0.372717714  | 3.551411761 | 0.522964477 | NA          | NA |
| ASV_16s_17493 | 0.156151261 | 0.372717714  | 3.551411761 | 0.522964477 | NA          | NA |
| ASV_16s_17494 | 0.220813346 | 0.40174909   | 3.551013676 | 0.636789942 | NA          | NA |
| ASV_16s_17495 | 0.139466337 | 0.365122044  | 3.55151168  | 0.486861559 | NA          | NA |
| ASV_16s_17496 | 0.139466337 | 0.365122044  | 3.55151168  | 0.486861559 | NA          | NA |
| ASV_16s_17497 | 0.139466337 | 0.365122044  | 3.55151168  | 0.486861559 | NA          | NA |
| ASV_16s_17498 | 0.228156371 | 0.31164432   | 3.550113926 | 1.329287231 | 0.987639382 | NA |
| ASV_16s_17499 | 0.04856099  | 0.341319451  | 3.551875174 | 0.21681556  | NA          | NA |
| ASV_16s_17500 | 0.04856099  | 0.341319451  | 3.551875174 | 0.21681556  | NA          | NA |
| ASV_16s_17501 | 0.078358004 | -0.339714837 | 3.551414056 | 0.325293592 | NA          | NA |
| ASV_16s_17502 | 0.078358004 | -0.339714837 | 3.551414056 | 0.325293592 | NA          | NA |
| ASV_16s_17503 | 0.08971013  | -0.049700642 | 3.551267768 | 0.443159086 | NA          | NA |
| ASV_16s_17504 | 0.102510304 | -0.416826416 | 3.551230739 | 0.386948359 | 0.999764255 | NA |
| ASV_16s_17505 | 0.095163999 | -0.397041017 | 3.551286137 | 0.376770708 | NA          | NA |
| ASV_16s_17506 | 0.095163999 | -0.397041017 | 3.551286137 | 0.376770708 | NA          | NA |

|               |             |              |             |             |             |    |
|---------------|-------------|--------------|-------------|-------------|-------------|----|
| ASV_16s_17507 | 0.095163999 | -0.397041017 | 3.551286137 | 0.376770708 | NA          | NA |
| ASV_16s_17508 | 0.087215757 | -0.371150795 | 3.551342889 | 0.35308514  | NA          | NA |
| ASV_16s_17509 | 0.087215757 | -0.371150795 | 3.551342889 | 0.35308514  | NA          | NA |
| ASV_16s_17510 | 0.146439009 | -0.089922185 | 3.550904034 | 0.729312438 | NA          | NA |
| ASV_16s_17511 | 0.172013044 | 1.196202961  | 3.550911639 | 0.525926233 | NA          | NA |
| ASV_16s_17512 | 0.172013044 | 1.196202961  | 3.550911639 | 0.525926233 | NA          | NA |
| ASV_16s_17513 | 0.069139153 | 0.908292139  | 3.551595057 | 0.264229758 | NA          | NA |
| ASV_16s_17514 | 0.171062707 | 1.194631358  | 3.550916144 | 0.524063086 | NA          | NA |
| ASV_16s_17515 | 0.171062707 | 1.194631358  | 3.550916144 | 0.524063086 | NA          | NA |
| ASV_16s_17516 | 0.156151261 | -0.078456657 | 3.550864423 | 0.816519572 | NA          | NA |
| ASV_16s_17517 | 0.150575672 | -0.078411343 | 3.550877317 | 0.799411622 | 0.997449953 | NA |
| ASV_16s_17518 | 0.133151956 | -0.078254598 | 3.550924514 | 0.742610339 | NA          | NA |
| ASV_16s_17519 | 0.133151956 | -0.078254598 | 3.550924514 | 0.742610339 | NA          | NA |
| ASV_16s_17520 | 0.133151956 | -0.078254598 | 3.550924514 | 0.742610339 | NA          | NA |
| ASV_16s_17521 | 0.133151956 | -0.078254598 | 3.550924514 | 0.742610339 | NA          | NA |
| ASV_16s_17522 | 0.133151956 | -0.078254598 | 3.550924514 | 0.742610339 | NA          | NA |
| ASV_16s_17523 | 0.133151956 | -0.078254598 | 3.550924514 | 0.742610339 | NA          | NA |
| ASV_16s_17524 | 0.133151956 | -0.078254598 | 3.550924514 | 0.742610339 | NA          | NA |
| ASV_16s_17525 | 0.133151956 | -0.078254598 | 3.550924514 | 0.742610339 | NA          | NA |
| ASV_16s_17526 | 0.087265044 | 0.220183659  | 3.550908053 | 0.404207217 | NA          | NA |
| ASV_16s_17527 | 0.091153056 | 0.2201729    | 3.550893984 | 0.42119395  | 0.999686954 | NA |
| ASV_16s_17528 | 0.092920334 | 0.220168346  | 3.550887976 | 0.428771398 | 0.999667767 | NA |
| ASV_16s_17529 | 0.093273789 | 0.220167456  | 3.550886802 | 0.430276524 | 0.999663863 | NA |
| ASV_16s_17530 | 0.096550865 | 0.220159491  | 3.550876318 | 0.444101219 | 0.999626515 | NA |
| ASV_16s_17531 | 0.096886325 | 0.220158707  | 3.550875285 | 0.445499912 | 0.999622585 | NA |
| ASV_16s_17532 | 0.099127028 | 0.220153644  | 3.550868561 | 0.454765038 | NA          | NA |
| ASV_16s_17533 | 0.099127028 | 0.220153644  | 3.550868561 | 0.454765038 | NA          | NA |
| ASV_16s_17534 | 0.098995062 | 0.22015392   | 3.550868948 | 0.454223438 | 0.999597435 | NA |
| ASV_16s_17535 | 0.102091958 | 0.424027202  | 3.550819745 | 0.708394113 | 0.998270406 | NA |
| ASV_16s_17536 | 0.159379566 | 0.310947608  | 3.550998209 | 0.806558967 | NA          | NA |
| ASV_16s_17537 | 0.169183233 | 0.310946075  | 3.550974568 | 0.835135023 | NA          | NA |
| ASV_16s_17538 | 0.169183233 | 0.310946075  | 3.550974568 | 0.835135023 | NA          | NA |
| ASV_16s_17539 | 0.147520101 | 0.310949733  | 3.551030978 | 0.770082998 | NA          | NA |
| ASV_16s_17540 | 0.168647729 | 0.310946154  | 3.550975789 | 0.833609082 | NA          | NA |
| ASV_16s_17541 | 0.104422501 | 0.595786184  | 3.550812893 | 0.41801984  | NA          | NA |
| ASV_16s_17542 | 0.104422501 | 0.595786184  | 3.550812893 | 0.41801984  | NA          | NA |
| ASV_16s_17543 | 0.135629548 | -0.066248138 | 3.550935786 | 0.780479592 | NA          | NA |
| ASV_16s_17544 | 0.162850078 | 0.311361213  | 3.551947103 | 0.418475009 | NA          | NA |
| ASV_16s_17545 | 0.217238365 | 0.047808345  | 2.544430514 | 1.145219031 | 0.992134014 | NA |
| ASV_16s_17546 | 0.209282003 | -0.11732755  | 3.550580454 | 0.879793937 | NA          | NA |
| ASV_16s_17547 | 0.121942187 | 0.207250779  | 3.550975059 | 0.795573865 | 0.997488862 | NA |
| ASV_16s_17548 | 0.158357936 | -0.049380335 | 3.551411595 | 0.663780387 | 0.998598817 | NA |
| ASV_16s_17549 | 0.158669947 | 0.789690799  | 3.551505744 | 0.404796132 | 0.999725846 | NA |
| ASV_16s_17550 | 0.143040101 | -0.04839616  | 3.551359658 | 0.706429177 | 0.998285849 | NA |
| ASV_16s_17551 | 0.293409429 | -1.078611145 | 3.550641741 | 0.562063335 | 0.999186011 | NA |
| ASV_16s_17552 | 0.152324085 | -0.06738928  | 3.550916305 | 0.943457817 | 0.99568981  | NA |
| ASV_16s_17553 | 0.173892988 | -0.517914048 | 3.550633222 | 0.642264274 | 0.998741097 | NA |
| ASV_16s_17554 | 0.126102786 | 1.118955091  | 3.551549518 | 0.426693848 | 0.999673106 | NA |
| ASV_16s_17555 | 0.196168005 | 1.390367034  | 3.5510624   | 0.439635554 | 0.999638874 | NA |
| ASV_16s_17556 | 0.150421156 | 0.357447512  | 3.551706692 | 0.588657639 | NA          | NA |
| ASV_16s_17557 | 0.196285008 | 0.70177108   | 3.551134724 | 0.8167238   | 0.997269512 | NA |
| ASV_16s_17558 | 0.199674167 | 0.742549883  | 3.551214532 | 0.943276148 | NA          | NA |
| ASV_16s_17559 | 0.162441099 | 0.363443625  | 3.551496822 | 0.658210797 | NA          | NA |
| ASV_16s_17560 | 0.175042393 | 0.163987285  | 3.551006186 | 0.843419366 | 0.996975183 | NA |
| ASV_16s_17561 | 0.203912695 | 0.282811637  | 3.551525317 | 0.676883038 | NA          | NA |
| ASV_16s_17562 | 0.117415795 | 0.282965498  | 3.551702468 | 0.502578965 | NA          | NA |
| ASV_16s_17563 | 0.080942419 | 0.286504802  | 3.551807014 | 0.391777142 | NA          | NA |
| ASV_16s_17564 | 0.080942419 | 0.286504802  | 3.551807014 | 0.391777142 | NA          | NA |
| ASV_16s_17565 | 0.112254852 | 0.283404589  | 3.551714468 | 0.488217576 | NA          | NA |
| ASV_16s_17566 | 0.220813346 | -0.553926823 | 3.551047224 | 0.709649393 | NA          | NA |
| ASV_16s_17567 | 0.152592835 | -0.020165364 | 3.551245806 | 0.739571844 | 0.998012867 | NA |
| ASV_16s_17568 | 0.298094943 | -0.60137     | 3.550724775 | 0.810620536 | NA          | NA |
| ASV_16s_17569 | 0.043105185 | -0.134369153 | 3.551796335 | 0.247181358 | 0.99994816  | NA |
| ASV_16s_17570 | 0.176856101 | -0.531414564 | 3.550525248 | 0.563597277 | NA          | NA |
| ASV_16s_17571 | 0.209645178 | 1.235763054  | 3.550716467 | 0.730526867 | NA          | NA |
| ASV_16s_17572 | 0.215450259 | 1.205799165  | 3.550433303 | 0.835191736 | NA          | NA |
| ASV_16s_17573 | 0.111744164 | -0.077992831 | 3.5510025   | 0.664766192 | NA          | NA |

|               |             |              |             |             |             |    |
|---------------|-------------|--------------|-------------|-------------|-------------|----|
| ASV_16s_17574 | 0.111744164 | -0.077992831 | 3.5510025   | 0.664766192 | NA          | NA |
| ASV_16s_17575 | 0.139259689 | 0.130479935  | 3.550604179 | 0.91293102  | 0.996113526 | NA |
| ASV_16s_17576 | 0.309226607 | -0.029196348 | 3.550782428 | 1.213509138 | NA          | NA |
| ASV_16s_17577 | 0.195260197 | 0.133384789  | 3.550494469 | 1.113467767 | 0.992784786 | NA |
| ASV_16s_17578 | 0.24665871  | -0.028996404 | 3.550848892 | 1.099564076 | NA          | NA |
| ASV_16s_17579 | 0.147430762 | -0.028333716 | 3.551068941 | 0.848636711 | NA          | NA |
| ASV_16s_17580 | 0.147430762 | -0.028333716 | 3.551068941 | 0.848636711 | NA          | NA |
| ASV_16s_17581 | 0.147430762 | -0.028333716 | 3.551068941 | 0.848636711 | NA          | NA |
| ASV_16s_17582 | 0.147430762 | -0.028333716 | 3.551068941 | 0.848636711 | NA          | NA |
| ASV_16s_17583 | 0.168458408 | -0.073434127 | 3.550871137 | 0.876862231 | NA          | NA |
| ASV_16s_17584 | 0.123035217 | -0.072972194 | 3.551002149 | 0.731170903 | NA          | NA |
| ASV_16s_17585 | 0.123035217 | -0.072972194 | 3.551002149 | 0.731170903 | NA          | NA |
| ASV_16s_17586 | 0.12216432  | -0.072960028 | 3.551005605 | 0.728013194 | 0.998111116 | NA |
| ASV_16s_17587 | 0.12082448  | -0.072940973 | 3.551011018 | 0.723121733 | NA          | NA |
| ASV_16s_17588 | 0.12082448  | -0.072940973 | 3.551011018 | 0.723121733 | NA          | NA |
| ASV_16s_17589 | 0.12082448  | -0.072940973 | 3.551011018 | 0.723121733 | NA          | NA |
| ASV_16s_17590 | 0.12082448  | -0.072940973 | 3.551011018 | 0.723121733 | NA          | NA |
| ASV_16s_17591 | 0.149405963 | 0.292102814  | 3.550842894 | 0.914122362 | NA          | NA |
| ASV_16s_17592 | 0.172790813 | 0.362998877  | 3.550816697 | 0.976372225 | 0.995200733 | NA |
| ASV_16s_17593 | 0.17538913  | 0.369714438  | 3.55085389  | 0.973669298 | 0.995242177 | NA |
| ASV_16s_17594 | 0.198234652 | 0.783579165  | 3.55073989  | 0.759917161 | 0.997831821 | NA |
| ASV_16s_17595 | 0.219495987 | 0.360722809  | 3.550529737 | 1.107113    | 0.992910799 | NA |
| ASV_16s_17596 | 0.205844503 | 0.359003423  | 3.550578494 | 1.065497518 | NA          | NA |
| ASV_16s_17597 | 0.168177583 | 0.360290559  | 3.5511966   | 0.893953071 | NA          | NA |
| ASV_16s_17598 | 0.168177583 | 0.360290559  | 3.5511966   | 0.893953071 | NA          | NA |
| ASV_16s_17599 | 0.168177583 | 0.360290559  | 3.5511966   | 0.893953071 | NA          | NA |
| ASV_16s_17600 | 0.168177583 | 0.360290559  | 3.5511966   | 0.893953071 | NA          | NA |
| ASV_16s_17601 | 0.168177583 | 0.360290559  | 3.5511966   | 0.893953071 | NA          | NA |
| ASV_16s_17602 | 0.149504061 | 0.360267814  | 3.551271127 | 0.837990231 | NA          | NA |
| ASV_16s_17603 | 0.149504061 | 0.360267814  | 3.551271127 | 0.837990231 | NA          | NA |
| ASV_16s_17604 | 0.149504061 | 0.360267814  | 3.551271127 | 0.837990231 | NA          | NA |
| ASV_16s_17605 | 0.149504061 | 0.360267814  | 3.551271127 | 0.837990231 | NA          | NA |
| ASV_16s_17606 | 0.149504061 | 0.360267814  | 3.551271127 | 0.837990231 | NA          | NA |
| ASV_16s_17607 | 0.149504061 | 0.360267814  | 3.551271127 | 0.837990231 | NA          | NA |
| ASV_16s_17608 | 0.149504061 | 0.360267814  | 3.551271127 | 0.837990231 | NA          | NA |
| ASV_16s_17609 | 0.149504061 | 0.360267814  | 3.551271127 | 0.837990231 | NA          | NA |
| ASV_16s_17610 | 0.149504061 | 0.360267814  | 3.551271127 | 0.837990231 | NA          | NA |
| ASV_16s_17611 | 0.149504061 | 0.360267814  | 3.551271127 | 0.837990231 | NA          | NA |
| ASV_16s_17612 | 0.139496401 | 0.418573722  | 3.551275987 | 1.009114544 | 0.994680163 | NA |
| ASV_16s_17613 | 0.182359592 | 0.583848216  | 3.551097261 | 1.298317023 | 0.988484288 | NA |
| ASV_16s_17614 | 0.273992219 | 0.360361411  | 3.550965017 | 1.136391986 | NA          | NA |
| ASV_16s_17615 | 0.193711602 | 0.315939774  | 3.550957565 | 0.923908972 | NA          | NA |
| ASV_16s_17616 | 0.185751636 | 0.315939701  | 3.550973342 | 0.903318335 | 0.996241121 | NA |
| ASV_16s_17617 | 0.168671375 | 0.31593975   | 3.551012187 | 0.856451613 | 0.996824262 | NA |
| ASV_16s_17618 | 0.167533182 | 0.315939753  | 3.551015054 | 0.853195589 | 0.996862419 | NA |
| ASV_16s_17619 | 0.170159142 | 0.315939745  | 3.551008493 | 0.860695107 | 0.996774079 | NA |
| ASV_16s_17620 | 0.165256798 | 0.315939761  | 3.551020906 | 0.84651921  | 0.996939719 | NA |
| ASV_16s_17621 | 0.202268798 | 0.898527465  | 3.550807674 | 1.013037686 | 0.99461547  | NA |
| ASV_16s_17622 | 0.167443717 | 0.315939861  | 3.551015272 | 0.852969248 | NA          | NA |
| ASV_16s_17623 | 0.167443717 | 0.315939861  | 3.551015272 | 0.852969248 | NA          | NA |
| ASV_16s_17624 | 0.259955883 | 0.315939577  | 3.550863597 | 1.070865851 | NA          | NA |
| ASV_16s_17625 | 0.156151261 | 0.315939909  | 3.551046004 | 0.819651121 | NA          | NA |
| ASV_16s_17626 | 0.156151261 | 0.315939909  | 3.551046004 | 0.819651121 | NA          | NA |
| ASV_16s_17627 | 0.181210484 | 0.315939713  | 3.550983034 | 0.888330946 | 0.996434579 | NA |
| ASV_16s_17628 | 0.185387021 | 0.315939701  | 3.550974176 | 0.899690073 | 0.996288565 | NA |
| ASV_16s_17629 | 0.210250038 | 0.596119474  | 3.550680789 | 0.732536649 | NA          | NA |
| ASV_16s_17630 | 0.210250038 | 0.596119474  | 3.550680789 | 0.732536649 | NA          | NA |
| ASV_16s_17631 | 0.148708629 | 0.687488948  | 3.551000164 | 0.71173801  | NA          | NA |
| ASV_16s_17632 | 0.148708629 | 0.687488948  | 3.551000164 | 0.71173801  | NA          | NA |
| ASV_16s_17633 | 0.261830065 | 1.11263332   | 3.55090824  | 0.835765662 | 0.99706159  | NA |
| ASV_16s_17634 | 0.230314118 | 1.12502983   | 3.550979188 | 0.757590175 | 0.997853059 | NA |
| ASV_16s_17635 | 0.214081194 | 0.73387753   | 3.551077542 | 0.949126976 | 0.99560798  | NA |
| ASV_16s_17636 | 0.215856426 | 1.105514586  | 3.550861927 | 0.709839511 | 0.998258987 | NA |
| ASV_16s_17637 | 0.182805579 | 1.06200959   | 3.5510241   | 0.648200006 | NA          | NA |
| ASV_16s_17638 | 0.244110512 | 0.734088855  | 3.551016192 | 1.015160845 | NA          | NA |
| ASV_16s_17639 | 0.20656893  | 0.73381529   | 3.551095625 | 0.932489243 | NA          | NA |
| ASV_16s_17640 | 0.20656893  | 0.73381529   | 3.551095625 | 0.932489243 | NA          | NA |

|               |             |              |             |             |             |    |
|---------------|-------------|--------------|-------------|-------------|-------------|----|
| ASV_16s_17641 | 0.20656893  | 0.73381529   | 3.551095625 | 0.932489243 | NA          | NA |
| ASV_16s_17642 | 0.20656893  | 0.73381529   | 3.551095625 | 0.932489243 | NA          | NA |
| ASV_16s_17643 | 0.20656893  | 0.73381529   | 3.551095625 | 0.932489243 | NA          | NA |
| ASV_16s_17644 | 0.20656893  | 0.73381529   | 3.551095625 | 0.932489243 | NA          | NA |
| ASV_16s_17645 | 0.201286476 | 1.106147419  | 3.551080107 | 0.699415549 | 0.998340223 | NA |
| ASV_16s_17646 | 0.169901535 | 1.018240421  | 3.551087234 | 0.631337174 | NA          | NA |
| ASV_16s_17647 | 0.19204218  | 0.69286134   | 3.550938    | 0.856381326 | NA          | NA |
| ASV_16s_17648 | 0.172465315 | 0.692713376  | 3.550981491 | 0.804977207 | 0.997392827 | NA |
| ASV_16s_17649 | 0.195179535 | 0.692882319  | 3.550931838 | 0.864229089 | 0.996731895 | NA |
| ASV_16s_17650 | 0.188040521 | 0.692831361  | 3.550946182 | 0.844935469 | 0.996957872 | NA |
| ASV_16s_17651 | 0.19749127  | 0.692897358  | 3.550927422 | 0.869950713 | NA          | NA |
| ASV_16s_17652 | 0.185753664 | 0.692814941  | 3.550950994 | 0.839559853 | 0.99701896  | NA |
| ASV_16s_17653 | 0.156151261 | 0.692562196  | 3.551025977 | 0.758672677 | NA          | NA |
| ASV_16s_17654 | 0.156151261 | 0.692562196  | 3.551025977 | 0.758672677 | NA          | NA |
| ASV_16s_17655 | 0.156151261 | 0.692562196  | 3.551025977 | 0.758672677 | NA          | NA |
| ASV_16s_17656 | 0.156151261 | 0.692562196  | 3.551025977 | 0.758672677 | NA          | NA |
| ASV_16s_17657 | 0.156151261 | 0.692562196  | 3.551025977 | 0.758672677 | NA          | NA |
| ASV_16s_17658 | 0.156151261 | 0.692562196  | 3.551025977 | 0.758672677 | NA          | NA |
| ASV_16s_17659 | 0.173907187 | 0.692725318  | 3.550977979 | 0.806898563 | 0.997372912 | NA |
| ASV_16s_17660 | 0.229394456 | 0.693074269  | 3.550875519 | 0.94357669  | NA          | NA |
| ASV_16s_17661 | 0.261203359 | 1.473846299  | 3.550721282 | 0.571484787 | 0.999140365 | NA |
| ASV_16s_17662 | 0.220299813 | 0.280119618  | 3.55142969  | 0.702890342 | NA          | NA |
| ASV_16s_17663 | 0.13054789  | 0.295318371  | 3.551833642 | 0.527957813 | NA          | NA |
| ASV_16s_17664 | 0.13054789  | 0.295318371  | 3.551833642 | 0.527957813 | NA          | NA |
| ASV_16s_17665 | 0.13054789  | 0.295318371  | 3.551833642 | 0.527957813 | NA          | NA |
| ASV_16s_17666 | 0.13054789  | 0.295318371  | 3.551833642 | 0.527957813 | NA          | NA |
| ASV_16s_17667 | 0.13054789  | 0.295318371  | 3.551833642 | 0.527957813 | NA          | NA |
| ASV_16s_17668 | 0.13054789  | 0.295318371  | 3.551833642 | 0.527957813 | NA          | NA |
| ASV_16s_17669 | 0.13054789  | 0.295318371  | 3.551833642 | 0.527957813 | NA          | NA |
| ASV_16s_17670 | 0.13054789  | 0.295318371  | 3.551833642 | 0.527957813 | NA          | NA |
| ASV_16s_17671 | 0.13054789  | 0.295318371  | 3.551833642 | 0.527957813 | NA          | NA |
| ASV_16s_17672 | 0.13054789  | 0.295318371  | 3.551833642 | 0.527957813 | NA          | NA |
| ASV_16s_17673 | 0.13054789  | 0.295318371  | 3.551833642 | 0.527957813 | NA          | NA |
| ASV_16s_17674 | 0.13054789  | 0.295318371  | 3.551833642 | 0.527957813 | NA          | NA |
| ASV_16s_17675 | 0.13054789  | 0.295318371  | 3.551833642 | 0.527957813 | NA          | NA |
| ASV_16s_17676 | 0.13054789  | 0.295318371  | 3.551833642 | 0.527957813 | NA          | NA |
| ASV_16s_17677 | 0.13054789  | 0.295318371  | 3.551833642 | 0.527957813 | NA          | NA |
| ASV_16s_17678 | 0.13054789  | 0.295318371  | 3.551833642 | 0.527957813 | NA          | NA |
| ASV_16s_17679 | 0.130593523 | 0.031881692  | 3.551521343 | 0.753223952 | 0.997892536 | NA |
| ASV_16s_17680 | 0.132619241 | 0.020253713  | 3.55149206  | 0.763651118 | 0.997797453 | NA |
| ASV_16s_17681 | 0.149833854 | -0.087843479 | 3.551213752 | 0.87440287  | 0.996608448 | NA |
| ASV_16s_17682 | 0.133137079 | -0.032573041 | 3.551417304 | 0.801783434 | 0.99742571  | NA |
| ASV_16s_17683 | 0.133654916 | -0.08183718  | 3.551353047 | 0.826385327 | 0.997165265 | NA |
| ASV_16s_17684 | 0.132642057 | -0.077016748 | 3.55136705  | 0.821752741 | 0.99721557  | NA |
| ASV_16s_17685 | 0.137529814 | -0.09960881  | 3.551302156 | 0.844349556 | 0.996964569 | NA |
| ASV_16s_17686 | 0.133913835 | -0.105462313 | 3.551323803 | 0.834126501 | 0.997079883 | NA |
| ASV_16s_17687 | 0.133913835 | -0.105462313 | 3.551323803 | 0.834126501 | 0.997079883 | NA |
| ASV_16s_17688 | 0.158405394 | -0.193041463 | 3.551030673 | 0.94909938  | 0.99560838  | NA |
| ASV_16s_17689 | 0.132653465 | -0.121840475 | 3.551315995 | 0.833316618 | 0.997088893 | NA |
| ASV_16s_17690 | 0.134172754 | -0.128392203 | 3.551297427 | 0.839749072 | 0.997016823 | NA |
| ASV_16s_17691 | 0.134172754 | -0.128392203 | 3.551297427 | 0.839749072 | 0.997016823 | NA |
| ASV_16s_17692 | 0.130633451 | -0.134938445 | 3.551318826 | 0.827949014 | 0.997148152 | NA |
| ASV_16s_17693 | 0.130633451 | -0.134938445 | 3.551318826 | 0.827949014 | 0.997148152 | NA |
| ASV_16s_17694 | 0.130633451 | -0.134938445 | 3.551318826 | 0.827949014 | 0.997148152 | NA |
| ASV_16s_17695 | 0.134431673 | -0.150757225 | 3.551273832 | 0.843258919 | 0.996977011 | NA |
| ASV_16s_17696 | 0.130639155 | -0.156568153 | 3.551298615 | 0.8291108   | 0.997135394 | NA |
| ASV_16s_17697 | 0.134949511 | -0.194233552 | 3.55123422  | 0.8441053   | 0.996967359 | NA |
| ASV_16s_17698 | 0.134949511 | -0.194233552 | 3.55123422  | 0.8441053   | 0.996967359 | NA |
| ASV_16s_17699 | 0.13520843  | -0.215467298 | 3.551217773 | 0.841786281 | 0.996993757 | NA |
| ASV_16s_17700 | 0.13520843  | -0.215467298 | 3.551217773 | 0.841786281 | 0.996993757 | NA |
| ASV_16s_17701 | 0.130650564 | -0.198865266 | 3.551265135 | 0.825860448 | 0.997170995 | NA |
| ASV_16s_17702 | 0.130650564 | -0.198865266 | 3.551265135 | 0.825860448 | 0.997170995 | NA |
| ASV_16s_17703 | 0.130656268 | -0.219670031 | 3.551251598 | 0.821750406 | 0.997215595 | NA |
| ASV_16s_17704 | 0.14218443  | -0.277385668 | 3.551126128 | 0.852352706 | 0.996872247 | NA |
| ASV_16s_17705 | 0.134206979 | -0.252474961 | 3.551204273 | 0.826961586 | 0.997158967 | NA |
| ASV_16s_17706 | 0.130667676 | -0.261332334 | 3.551228173 | 0.808272624 | 0.997358609 | NA |
| ASV_16s_17707 | 0.130667676 | -0.261332334 | 3.551228173 | 0.808272624 | 0.997358609 | NA |

|               |             |              |             |             |             |    |
|---------------|-------------|--------------|-------------|-------------|-------------|----|
| ASV_16s_17708 | 0.130679084 | -0.303438236 | 3.551210553 | 0.780156127 | 0.997641232 | NA |
| ASV_16s_17709 | 0.046669299 | -0.169333869 | 3.551822392 | 0.270931686 | 0.999929185 | NA |
| ASV_16s_17710 | 0.046669299 | -0.169333869 | 3.551822392 | 0.270931686 | 0.999929185 | NA |
| ASV_16s_17711 | 0.178108473 | -0.600493181 | 3.550890295 | 0.650062256 | NA          | NA |
| ASV_16s_17712 | 0.183680583 | -0.60933364  | 3.550858884 | 0.660659437 | NA          | NA |
| ASV_16s_17713 | 0.163271815 | -0.574145388 | 3.550974996 | 0.620322058 | NA          | NA |
| ASV_16s_17714 | 0.163271815 | -0.574145388 | 3.550974996 | 0.620322058 | NA          | NA |
| ASV_16s_17715 | 0.163271815 | -0.574145388 | 3.550974996 | 0.620322058 | NA          | NA |
| ASV_16s_17716 | 0.159499413 | -0.566832017 | 3.550997846 | 0.612333184 | 0.998922442 | NA |
| ASV_16s_17717 | 0.154332883 | -0.556559466 | 3.551030378 | 0.60122885  | 0.99898498  | NA |
| ASV_16s_17718 | 0.145291456 | -0.537785575 | 3.551091586 | 0.580645037 | NA          | NA |
| ASV_16s_17719 | 0.138833293 | -0.52272634  | 3.551134132 | 0.566130258 | NA          | NA |
| ASV_16s_17720 | 0.138833293 | -0.52272634  | 3.551134132 | 0.566130258 | NA          | NA |
| ASV_16s_17721 | 0.138833293 | -0.52272634  | 3.551134132 | 0.566130258 | NA          | NA |
| ASV_16s_17722 | 0.138833293 | -0.52272634  | 3.551134132 | 0.566130258 | NA          | NA |
| ASV_16s_17723 | 0.136047931 | -0.515772963 | 3.551151834 | 0.559438595 | 0.999198429 | NA |
| ASV_16s_17724 | 0.136047931 | -0.515772963 | 3.551151834 | 0.559438595 | 0.999198429 | NA |
| ASV_16s_17725 | 0.15955692  | -0.566920983 | 3.550997567 | 0.610125652 | 0.998935075 | NA |
| ASV_16s_17726 | 0.135288286 | -0.513865164 | 3.551156681 | 0.557591045 | 0.999207093 | NA |
| ASV_16s_17727 | 0.13073042  | -0.502207268 | 3.551186673 | 0.546338149 | NA          | NA |
| ASV_16s_17728 | 0.13073042  | -0.502207268 | 3.551186673 | 0.546338149 | NA          | NA |
| ASV_16s_17729 | 0.13073042  | -0.502207268 | 3.551186673 | 0.546338149 | NA          | NA |
| ASV_16s_17730 | 0.13073042  | -0.502207268 | 3.551186673 | 0.546338149 | NA          | NA |
| ASV_16s_17731 | 0.13073042  | -0.502207268 | 3.551186673 | 0.546338149 | NA          | NA |
| ASV_16s_17732 | 0.13073042  | -0.502207268 | 3.551186673 | 0.546338149 | NA          | NA |
| ASV_16s_17733 | 0.13073042  | -0.502207268 | 3.551186673 | 0.546338149 | NA          | NA |
| ASV_16s_17734 | 0.13073042  | -0.502207268 | 3.551186673 | 0.546338149 | NA          | NA |
| ASV_16s_17735 | 0.13073042  | -0.502207268 | 3.551186673 | 0.546338149 | NA          | NA |
| ASV_16s_17736 | 0.13073042  | -0.502207268 | 3.551186673 | 0.546338149 | NA          | NA |
| ASV_16s_17737 | 0.13073042  | -0.502207268 | 3.551186673 | 0.546338149 | NA          | NA |
| ASV_16s_17738 | 0.162788133 | -0.573169322 | 3.55097811  | 0.616459766 | 0.998898558 | NA |
| ASV_16s_17739 | 0.036945229 | -0.151074632 | 3.551144043 | 0.157812673 | NA          | NA |
| ASV_16s_17740 | 0.084620649 | 0.220191429  | 3.550918382 | 0.392351019 | NA          | NA |
| ASV_16s_17741 | 0.142529012 | 0.027395163  | 3.55138147  | 0.792106847 | 0.997523673 | NA |
| ASV_16s_17742 | 0.13799762  | -0.086609943 | 3.551291355 | 0.756019874 | 0.997867312 | NA |
| ASV_16s_17743 | 0.190447384 | -0.815752365 | 3.550737049 | 0.543021421 | 0.99927321  | NA |
| ASV_16s_17744 | 0.141517934 | 0.151648352  | 3.551412782 | 0.762692887 | 0.997806307 | NA |
| ASV_16s_17745 | 0.133696405 | -0.012078344 | 3.551306043 | 0.688566232 | 0.998422054 | NA |
| ASV_16s_17746 | 0.13373063  | -0.18540627  | 3.551204502 | 0.547304957 | NA          | NA |
| ASV_16s_17747 | 0.137971076 | -0.156295594 | 3.551555481 | 0.707979972 | 0.998273668 | NA |
| ASV_16s_17748 | 0.182620033 | -0.605396196 | 3.550793893 | 0.734729593 | 0.998054428 | NA |
| ASV_16s_17749 | 0.162979826 | -0.547708819 | 3.550945513 | 0.696603303 | 0.9983617   | NA |
| ASV_16s_17750 | 0.172283581 | -0.560524741 | 3.550828933 | 0.732549162 | 0.998072953 | NA |
| ASV_16s_17751 | 0.151127151 | -0.508444366 | 3.551053065 | 0.667401643 | 0.998573862 | NA |
| ASV_16s_17752 | 0.156952434 | -0.528588041 | 3.550999307 | 0.682104671 | NA          | NA |
| ASV_16s_17753 | 0.179273902 | -0.552531724 | 3.550737469 | 0.786049358 | 0.997583731 | NA |
| ASV_16s_17754 | 0.173877457 | -0.533891085 | 3.550783001 | 0.771518295 | 0.99772387  | NA |
| ASV_16s_17755 | 0.139026943 | 0.668387867  | 3.551651716 | 0.662679784 | 0.998606344 | NA |
| ASV_16s_17756 | 0.173524873 | -0.515947279 | 3.550785512 | 0.78439326  | 0.997599982 | NA |
| ASV_16s_17757 | 0.171919659 | -0.517728164 | 3.550799136 | 0.775817878 | 0.997682979 | NA |
| ASV_16s_17758 | 0.175708286 | -0.52751065  | 3.550766408 | 0.788938109 | 0.997555211 | NA |
| ASV_16s_17759 | 0.164715607 | -0.482159041 | 3.550853191 | 0.759531003 | 0.997835355 | NA |
| ASV_16s_17760 | 0.184819981 | 0.225686025  | 3.55100936  | 0.643819756 | 0.998731151 | NA |
| ASV_16s_17761 | 0.160231859 | -0.045161117 | 3.550849499 | 0.749476944 | 0.997926029 | NA |
| ASV_16s_17762 | 0.116896707 | 0.059259065  | 3.551322483 | 0.437969576 | 0.999643412 | NA |
| ASV_16s_17763 | 0.170019203 | -0.778580089 | 3.55093627  | 0.442814061 | 0.999630107 | NA |
| ASV_16s_17764 | 0.164937729 | -0.439824737 | 3.550833629 | 0.780806893 | 0.997634927 | NA |
| ASV_16s_17765 | 0.163310189 | -0.445341876 | 3.550849776 | 0.774116016 | 0.997699222 | NA |
| ASV_16s_17766 | 0.158501729 | -0.840469832 | 3.550887583 | 0.324064988 | 0.999870159 | NA |
| ASV_16s_17767 | 0.158638288 | -0.392771681 | 3.550886553 | 0.768455651 | 0.997752706 | NA |
| ASV_16s_17768 | 0.219091497 | -0.040218032 | 3.550656693 | 1.003677107 | 0.994769001 | NA |
| ASV_16s_17769 | 0.1730693   | -0.410532858 | 3.550781554 | 0.824538564 | 0.99718539  | NA |
| ASV_16s_17770 | 0.146173782 | -0.667485688 | 3.55091224  | 0.264030998 | 0.999935126 | NA |
| ASV_16s_17771 | 0.125434724 | -0.447686859 | 3.55073662  | 0.503050305 | 0.999435236 | NA |
| ASV_16s_17772 | 0.193583557 | 0.722177655  | 3.551326504 | 0.921206455 | 0.996001459 | NA |
| ASV_16s_17773 | 0.140845182 | 0.865308965  | 3.551421759 | 0.416506211 | 0.999698435 | NA |
| ASV_16s_17774 | 0.158838497 | -0.348068553 | 3.551384348 | 0.532256239 | 0.999319591 | NA |

|               |             |              |             |             |             |    |
|---------------|-------------|--------------|-------------|-------------|-------------|----|
| ASV_16s_17775 | 0.162199202 | -0.342001648 | 3.550924785 | 0.812548506 | 0.997313773 | NA |
| ASV_16s_17776 | 0.171754164 | 0.109472174  | 3.550887124 | 0.806557181 | 0.997376458 | NA |
| ASV_16s_17777 | 0.170005    | -0.285260738 | 3.550951742 | 0.818748173 | 0.997247881 | NA |
| ASV_16s_17778 | 0.155101216 | -0.285260738 | 3.550951742 | 0.766842748 | 0.997767794 | NA |
| ASV_16s_17779 | 0.171294449 | -0.285289849 | 3.550875098 | 0.824375106 | 0.997187167 | NA |
| ASV_16s_17780 | 0.173400207 | 0.136291505  | 3.55088776  | 0.808607664 | 0.997355114 | NA |
| ASV_16s_17781 | 0.145335876 | -0.666105263 | 3.551018234 | 0.472012505 | 0.999542644 | NA |
| ASV_16s_17782 | 0.16945233  | 0.183115455  | 3.549931202 | 0.76861783  | 0.997751185 | NA |
| ASV_16s_17783 | 0.168513066 | 0.33702619   | 3.551766278 | 0.548828066 | 0.999247326 | NA |
| ASV_16s_17784 | 0.175746814 | -0.224665565 | 3.550905212 | 0.83874601  | 0.997028138 | NA |
| ASV_16s_17785 | 0.161435622 | -0.224653507 | 3.550940023 | 0.790058699 | 0.997544089 | NA |
| ASV_16s_17786 | 0.213996443 | 0.586913955  | 3.55082828  | 1.045883228 | 0.994054032 | NA |
| ASV_16s_17787 | 0.16957575  | -0.1657243   | 3.55093397  | 0.817043967 | NA          | NA |
| ASV_16s_17788 | 0.21096051  | -0.467024641 | 3.550871974 | 0.737430845 | NA          | NA |
| ASV_16s_17789 | 0.164113509 | -0.071298006 | 3.551260702 | 0.688964759 | 0.998419097 | NA |
| ASV_16s_17790 | 0.165537282 | 0.77049452   | 3.551406189 | 0.401699888 | 0.999732797 | NA |
| ASV_16s_17791 | 0.162894903 | 0.167677154  | 3.550302051 | 0.692786737 | NA          | NA |
| ASV_16s_17792 | 0.147505996 | 0.311372021  | 3.551285801 | 0.593051598 | NA          | NA |
| ASV_16s_17793 | 0.197254998 | 1.364001436  | 3.551000363 | 0.460775605 | 0.999577809 | NA |
| ASV_16s_17794 | 0.168886239 | 1.09527561   | 3.551329673 | 0.657571862 | 0.998640921 | NA |
| ASV_16s_17795 | 0.177211882 | 0.690097482  | 3.550989308 | 0.801371443 | 0.997429932 | NA |
| ASV_16s_17796 | 0.151379421 | 0.021432261  | 3.551268566 | 0.558728455 | NA          | NA |
| ASV_16s_17797 | 0.22133134  | 0.280032386  | 3.551423378 | 0.704462519 | NA          | NA |
| ASV_16s_17798 | 0.167199804 | -0.769438777 | 3.551268107 | 0.333134955 | 0.999857489 | NA |
| ASV_16s_17799 | 0.17781593  | 1.482391673  | 3.550855066 | 0.351451089 | 0.999829339 | NA |
| ASV_16s_17800 | 0.162855432 | 1.148629476  | 3.551190488 | 0.566679943 | NA          | NA |
| ASV_16s_17801 | 0.174737037 | 0.804261946  | 3.551071496 | 0.584329988 | 0.999075392 | NA |
| ASV_16s_17802 | 0.149419651 | 1.119247382  | 3.551263107 | 0.537671342 | NA          | NA |
| ASV_16s_17803 | 0.146806697 | 1.377984128  | 3.551119477 | 0.307470146 | 0.999891284 | NA |
| ASV_16s_17804 | 0.141660097 | 0.347399626  | 3.55184348  | 0.555591971 | NA          | NA |
| ASV_16s_17805 | 0.150846445 | 0.596521994  | 3.55181164  | 0.494406103 | NA          | NA |
| ASV_16s_17806 | 0.1679455   | 0.358018793  | 3.551705366 | 0.611731383 | 0.998925896 | NA |
| ASV_16s_17807 | 0.171496825 | 0.359802398  | 3.551685701 | 0.618754776 | NA          | NA |
| ASV_16s_17808 | 0.201600426 | 0.86704581   | 3.551271419 | 0.662889443 | 0.998604912 | NA |
| ASV_16s_17809 | 0.109778114 | 0.336534418  | 3.55194548  | 0.475100278 | NA          | NA |
| ASV_16s_17810 | 0.091824735 | -0.189040413 | 3.551729587 | 0.373569043 | 0.999790494 | NA |
| ASV_16s_17811 | 0.111369652 | 0.449433719  | 3.550960512 | 0.311463413 | 0.999886437 | NA |
| ASV_16s_17812 | 0.21140244  | 0.333295139  | 3.551916895 | 0.525213077 | 0.999348824 | NA |
| ASV_16s_17813 | 0.195793478 | -0.480765224 | 3.551167413 | 0.629889962 | 0.998818367 | NA |
| ASV_16s_17814 | 0.183680583 | -0.534461719 | 3.550786439 | 0.643895742 | NA          | NA |
| ASV_16s_17815 | 0.183680583 | -0.534461719 | 3.550786439 | 0.643895742 | NA          | NA |
| ASV_16s_17816 | 0.183680583 | -0.534461719 | 3.550786439 | 0.643895742 | NA          | NA |
| ASV_16s_17817 | 0.161673463 | -0.463796045 | 3.551284358 | 0.540968465 | NA          | NA |
| ASV_16s_17818 | 0.125713979 | 0.114227124  | 3.551375171 | 0.430566784 | NA          | NA |
| ASV_16s_17819 | 0.097161727 | -0.592764501 | 3.551390474 | 0.241555577 | 0.999952069 | NA |
| ASV_16s_17820 | 0.143507393 | -0.489599735 | 3.551181766 | 0.564944543 | NA          | NA |
| ASV_16s_17821 | 0.143507393 | -0.489599735 | 3.551181766 | 0.564944543 | NA          | NA |
| ASV_16s_17822 | 0.197733523 | 1.209658828  | 3.551017088 | 0.63351317  | NA          | NA |
| ASV_16s_17823 | 0.084835543 | 0.970157374  | 3.551457767 | 0.312854695 | NA          | NA |
| ASV_16s_17824 | 0.084835543 | 0.970157374  | 3.551457767 | 0.312854695 | NA          | NA |
| ASV_16s_17825 | 0.233175237 | 1.273933318  | 3.550655813 | 0.630334722 | NA          | NA |
| ASV_16s_17826 | 0.145438007 | 1.145898414  | 3.551045269 | 0.470054661 | NA          | NA |
| ASV_16s_17827 | 0.157636923 | -0.044522743 | 3.551296899 | 0.603419755 | NA          | NA |
| ASV_16s_17828 | 0.122902012 | -0.019828184 | 3.55110752  | 0.68809975  | 0.998425511 | NA |
| ASV_16s_17829 | 0.183837428 | 0.385232645  | 3.551248442 | 0.576340742 | NA          | NA |
| ASV_16s_17830 | 0.166768987 | 0.377465785  | 3.551354899 | 0.544399674 | NA          | NA |
| ASV_16s_17831 | 0.194394439 | -0.047149946 | 3.550308499 | 1.01564172  | 0.994572252 | NA |
| ASV_16s_17832 | 0.176103592 | 0.759194846  | 3.550803593 | 0.881470914 | 0.996520922 | NA |
| ASV_16s_17833 | 0.124994931 | 0.358676083  | 3.551582777 | 0.452622169 | NA          | NA |
| ASV_16s_17834 | 0.124994931 | 0.358676083  | 3.551582777 | 0.452622169 | NA          | NA |
| ASV_16s_17835 | 0.124994931 | 0.358676083  | 3.551582777 | 0.452622169 | NA          | NA |
| ASV_16s_17836 | 0.135240085 | 0.363262855  | 3.551535141 | 0.477100571 | NA          | NA |
| ASV_16s_17837 | 0.047089444 | 0.341202862  | 3.551882322 | 0.211003956 | NA          | NA |
| ASV_16s_17838 | 0.047089444 | 0.341202862  | 3.551882322 | 0.211003956 | NA          | NA |
| ASV_16s_17839 | 0.047089444 | 0.341202862  | 3.551882322 | 0.211003956 | NA          | NA |
| ASV_16s_17840 | 0.047089444 | 0.341202862  | 3.551882322 | 0.211003956 | NA          | NA |
| ASV_16s_17841 | 0.189723289 | 0.388386035  | 3.551208949 | 0.586654675 | NA          | NA |



|               |             |              |             |             |             |    |
|---------------|-------------|--------------|-------------|-------------|-------------|----|
| ASV_16s_17842 | 0.162192372 | -0.072301637 | 3.550904336 | 0.74137546  | NA          | NA |
| ASV_16s_17843 | 0.075983519 | -0.330861586 | 3.551433025 | 0.317497347 | NA          | NA |
| ASV_16s_17844 | 0.075983519 | -0.330861586 | 3.551433025 | 0.317497347 | NA          | NA |
| ASV_16s_17845 | 0.186394035 | -0.535564597 | 3.550441083 | 0.580114876 | NA          | NA |
| ASV_16s_17846 | 0.092280241 | -0.387926199 | 3.551306118 | 0.368302564 | NA          | NA |
| ASV_16s_17847 | 0.067044027 | 0.899294426  | 3.551614295 | 0.257408635 | NA          | NA |
| ASV_16s_17848 | 0.14863161  | -0.078395864 | 3.550882064 | 0.79326104  | 0.99751212  | NA |
| ASV_16s_17849 | 0.129117049 | -0.078211925 | 3.550937279 | 0.728563325 | NA          | NA |
| ASV_16s_17850 | 0.129117049 | -0.078211925 | 3.550937279 | 0.728563325 | NA          | NA |
| ASV_16s_17851 | 0.129117049 | -0.078211925 | 3.550937279 | 0.728563325 | NA          | NA |
| ASV_16s_17852 | 0.129117049 | -0.078211925 | 3.550937279 | 0.728563325 | NA          | NA |
| ASV_16s_17853 | 0.129117049 | -0.078211925 | 3.550937279 | 0.728563325 | NA          | NA |
| ASV_16s_17854 | 0.129117049 | -0.078211925 | 3.550937279 | 0.728563325 | NA          | NA |
| ASV_16s_17855 | 0.089215572 | 0.22017814   | 3.550900868 | 0.412718225 | 0.999707499 | NA |
| ASV_16s_17856 | 0.090982849 | 0.220173389  | 3.550894599 | 0.420395043 | 0.999688932 | NA |
| ASV_16s_17857 | 0.092043216 | 0.220170625  | 3.550890953 | 0.424958271 | 0.99967752  | NA |
| ASV_16s_17858 | 0.096123179 | 0.22016057   | 3.550877667 | 0.442253488 | NA          | NA |
| ASV_16s_17859 | 0.096123179 | 0.22016057   | 3.550877667 | 0.442253488 | NA          | NA |
| ASV_16s_17860 | 0.164975942 | 0.31094664   | 3.5509844   | 0.82294987  | 0.997202627 | NA |
| ASV_16s_17861 | 0.163537192 | 0.310946946  | 3.550987869 | 0.818756799 | NA          | NA |
| ASV_16s_17862 | 0.101258183 | 0.595764239  | 3.550821095 | 0.405884848 | NA          | NA |
| ASV_16s_17863 | 0.101258183 | 0.595764239  | 3.550821095 | 0.405884848 | NA          | NA |
| ASV_16s_17864 | 0.101258183 | 0.595764239  | 3.550821095 | 0.405884848 | NA          | NA |
| ASV_16s_17865 | 0.156811247 | -0.387571816 | 3.551117427 | 0.573594599 | 0.999129912 | NA |
| ASV_16s_17866 | 0.210615024 | 0.907776233  | 3.551031418 | 0.623728234 | 0.998855628 | NA |
| ASV_16s_17867 | 0.133642784 | -0.065739015 | 3.550951303 | 0.787621129 | 0.997568241 | NA |
| ASV_16s_17868 | 0.202221006 | 0.40308011   | 3.550767634 | 1.031849387 | NA          | NA |
| ASV_16s_17869 | 0.162498321 | 1.09918397   | 3.551054684 | 0.687190181 | 0.998432237 | NA |
| ASV_16s_17870 | 0.136054305 | -0.066957257 | 3.551007162 | 0.872327387 | 0.996633874 | NA |
| ASV_16s_17871 | 0.136054305 | -0.066957257 | 3.551007162 | 0.872327387 | 0.996633874 | NA |
| ASV_16s_17872 | 0.163307654 | 0.322607411  | 3.551850993 | 0.497328174 | 0.999456206 | NA |
| ASV_16s_17873 | 0.137045342 | -0.066705972 | 3.551047755 | 0.877493395 | 0.996570356 | NA |
| ASV_16s_17874 | 0.231689115 | -1.115406765 | 3.550415788 | 0.4577019   | 0.999587095 | NA |
| ASV_16s_17875 | 0.120557893 | 0.127675468  | 3.551556714 | 0.633094982 | 0.998798668 | NA |
| ASV_16s_17876 | 0.152181191 | 0.366960811  | 3.551729671 | 0.518526806 | NA          | NA |
| ASV_16s_17877 | 0.153826648 | 0.319958492  | 3.551274612 | 0.632054606 | NA          | NA |
| ASV_16s_17878 | 0.168950605 | 0.319175413  | 3.551158156 | 0.693192771 | 0.998387495 | NA |
| ASV_16s_17879 | 0.146339393 | 0.361867947  | 3.551400274 | 0.727662238 | NA          | NA |
| ASV_16s_17880 | 0.182321652 | 0.279373349  | 3.551587362 | 0.65449722  | NA          | NA |
| ASV_16s_17881 | 0.182321652 | 0.279373349  | 3.551587362 | 0.65449722  | NA          | NA |
| ASV_16s_17882 | 0.294919531 | -0.563857709 | 3.550055902 | 0.796243119 | NA          | NA |
| ASV_16s_17883 | 0.294919531 | -0.563857709 | 3.550055902 | 0.796243119 | NA          | NA |
| ASV_16s_17884 | 0.235788115 | 0.116713324  | 3.551012865 | 1.040881963 | 0.994141821 | NA |
| ASV_16s_17885 | 0.178325678 | 0.384456824  | 3.55106659  | 0.784028408 | NA          | NA |
| ASV_16s_17886 | 0.189939052 | 0.739883361  | 3.551383006 | 0.761483991 | 0.997817443 | NA |
| ASV_16s_17887 | 0.171496825 | -0.528958254 | 3.550576762 | 0.553909316 | NA          | NA |
| ASV_16s_17888 | 0.171496825 | -0.528958254 | 3.550576762 | 0.553909316 | NA          | NA |
| ASV_16s_17889 | 0.180473024 | 1.201501037  | 3.550843471 | 0.624025644 | NA          | NA |
| ASV_16s_17890 | 0.163133176 | 0.001197514  | 3.550973883 | 0.863845791 | 0.996736488 | NA |
| ASV_16s_17891 | 0.299856104 | -0.029171661 | 3.550790644 | 1.197845567 | NA          | NA |
| ASV_16s_17892 | 0.239184204 | -0.028964264 | 3.550859169 | 1.084045267 | NA          | NA |
| ASV_16s_17893 | 0.231691871 | -0.131103338 | 3.55087835  | 0.987100819 | NA          | NA |
| ASV_16s_17894 | 0.142963163 | -0.028282651 | 3.55108601  | 0.834248198 | NA          | NA |
| ASV_16s_17895 | 0.142963163 | -0.028282651 | 3.55108601  | 0.834248198 | NA          | NA |
| ASV_16s_17896 | 0.216205398 | 0.57961204   | 3.550999642 | 1.269247535 | 0.989244131 | NA |
| ASV_16s_17897 | 0.173747387 | 0.265992905  | 3.550734388 | 0.985937593 | NA          | NA |
| ASV_16s_17898 | 0.179521708 | 0.320187411  | 3.55061861  | 1.036312189 | 0.99422131  | NA |
| ASV_16s_17899 | 0.18529603  | 0.343928722  | 3.55059709  | 1.033861702 | 0.994263649 | NA |
| ASV_16s_17900 | 0.119306877 | -0.072918985 | 3.551017333 | 0.717453307 | NA          | NA |
| ASV_16s_17901 | 0.119306877 | -0.072918985 | 3.551017333 | 0.717453307 | NA          | NA |
| ASV_16s_17902 | 0.117163132 | -0.072886815 | 3.551026475 | 0.709463243 | NA          | NA |
| ASV_16s_17903 | 0.117163132 | -0.072886815 | 3.551026475 | 0.709463243 | NA          | NA |
| ASV_16s_17904 | 0.117163132 | -0.072886815 | 3.551026475 | 0.709463243 | NA          | NA |
| ASV_16s_17905 | 0.117163132 | -0.072886815 | 3.551026475 | 0.709463243 | NA          | NA |
| ASV_16s_17906 | 0.117163132 | -0.072886815 | 3.551026475 | 0.709463243 | NA          | NA |
| ASV_16s_17907 | 0.166531149 | 0.361572669  | 3.550852456 | 0.951381032 | 0.995575167 | NA |
| ASV_16s_17908 | 0.169129466 | 0.368360538  | 3.550886532 | 0.949659333 | 0.995600244 | NA |

|               |             |              |             |             |             |    |
|---------------|-------------|--------------|-------------|-------------|-------------|----|
| ASV_16s_17909 | 0.211235533 | 0.330077247  | 3.550575646 | 1.023010184 | 0.994448761 | NA |
| ASV_16s_17910 | 0.210071207 | 0.517170373  | 3.550580018 | 0.887456318 | 0.996445664 | NA |
| ASV_16s_17911 | 0.199584838 | 0.357852466  | 3.550603423 | 1.043881964 | NA          | NA |
| ASV_16s_17912 | 0.145371417 | -0.073235088 | 3.550927595 | 0.80710834  | NA          | NA |
| ASV_16s_17913 | 0.18135271  | 0.289031016  | 3.550309104 | 0.985222348 | NA          | NA |
| ASV_16s_17914 | 0.163081293 | 0.360284859  | 3.551215309 | 0.879100299 | NA          | NA |
| ASV_16s_17915 | 0.163081293 | 0.360284859  | 3.551215309 | 0.879100299 | NA          | NA |
| ASV_16s_17916 | 0.163081293 | 0.360284859  | 3.551215309 | 0.879100299 | NA          | NA |
| ASV_16s_17917 | 0.163081293 | 0.360284859  | 3.551215309 | 0.879100299 | NA          | NA |
| ASV_16s_17918 | 0.1684976   | 0.362822749  | 3.551592945 | 0.693849357 | NA          | NA |
| ASV_16s_17919 | 0.157250349 | 0.341585107  | 3.551622295 | 0.631008647 | 0.998811516 | NA |
| ASV_16s_17920 | 0.144973635 | 0.360261426  | 3.551292121 | 0.823515174 | NA          | NA |
| ASV_16s_17921 | 0.144973635 | 0.360261426  | 3.551292121 | 0.823515174 | NA          | NA |
| ASV_16s_17922 | 0.144973635 | 0.360261426  | 3.551292121 | 0.823515174 | NA          | NA |
| ASV_16s_17923 | 0.144973635 | 0.360261426  | 3.551292121 | 0.823515174 | NA          | NA |
| ASV_16s_17924 | 0.144973635 | 0.360261426  | 3.551292121 | 0.823515174 | NA          | NA |
| ASV_16s_17925 | 0.144973635 | 0.360261426  | 3.551292121 | 0.823515174 | NA          | NA |
| ASV_16s_17926 | 0.187841553 | 0.315939799  | 3.550969097 | 0.90871523  | NA          | NA |
| ASV_16s_17927 | 0.187841553 | 0.315939799  | 3.550969097 | 0.90871523  | NA          | NA |
| ASV_16s_17928 | 0.169630479 | 0.31593977   | 3.551009832 | 0.859090271 | 0.996793118 | NA |
| ASV_16s_17929 | 0.163374112 | 0.315939792  | 3.551025902 | 0.840761045 | 0.99700538  | NA |
| ASV_16s_17930 | 0.163150901 | 0.315939792  | 3.551026496 | 0.84017648  | 0.997011994 | NA |
| ASV_16s_17931 | 0.162369665 | 0.315939892  | 3.551028588 | 0.838134942 | NA          | NA |
| ASV_16s_17932 | 0.198813851 | 0.315939692  | 3.550948183 | 0.935147683 | 0.995807972 | NA |
| ASV_16s_17933 | 0.181796404 | 0.487177346  | 3.550939182 | 1.283863852 | 0.988866073 | NA |
| ASV_16s_17934 | 0.156210143 | 0.315939818  | 3.551045866 | 0.819738284 | 0.997237261 | NA |
| ASV_16s_17935 | 0.154841361 | 0.315939824  | 3.55104989  | 0.815572639 | 0.997281763 | NA |
| ASV_16s_17936 | 0.15415697  | 0.315939826  | 3.551051929 | 0.813478524 | 0.997303955 | NA |
| ASV_16s_17937 | 0.182875351 | 0.315939731  | 3.550979464 | 0.892804274 | 0.996377532 | NA |
| ASV_16s_17938 | 0.151419405 | 0.315939942  | 3.551060269 | 0.805028247 | NA          | NA |
| ASV_16s_17939 | 0.151419405 | 0.315939942  | 3.551060269 | 0.805028247 | NA          | NA |
| ASV_16s_17940 | 0.151419405 | 0.315939942  | 3.551060269 | 0.805028247 | NA          | NA |
| ASV_16s_17941 | 0.151419405 | 0.467615966  | 3.551009816 | 1.134301715 | 0.992361772 | NA |
| ASV_16s_17942 | 0.144202306 | 0.687445838  | 3.551014029 | 0.697766108 | NA          | NA |
| ASV_16s_17943 | 0.144202306 | 0.687445838  | 3.551014029 | 0.697766108 | NA          | NA |
| ASV_16s_17944 | 0.260511553 | 0.688084927  | 3.550809621 | 0.982324061 | NA          | NA |
| ASV_16s_17945 | 0.241698338 | 1.035105881  | 3.550737595 | 0.749292856 | NA          | NA |
| ASV_16s_17946 | 0.222885123 | 1.14113511   | 3.55084104  | 0.701823329 | 0.998321688 | NA |
| ASV_16s_17947 | 0.236713223 | 0.734041757  | 3.551029899 | 0.999729233 | NA          | NA |
| ASV_16s_17948 | 0.236713223 | 0.734041757  | 3.551029899 | 0.999729233 | NA          | NA |
| ASV_16s_17949 | 0.236713223 | 0.734041757  | 3.551029899 | 0.999729233 | NA          | NA |
| ASV_16s_17950 | 0.215098374 | 0.733885701  | 3.551075209 | 0.951788788 | 0.995569215 | NA |
| ASV_16s_17951 | 0.200309266 | 0.733759852  | 3.551111178 | 0.917357576 | NA          | NA |
| ASV_16s_17952 | 0.200309266 | 0.733759852  | 3.551111178 | 0.917357576 | NA          | NA |
| ASV_16s_17953 | 0.200309266 | 0.733759852  | 3.551111178 | 0.917357576 | NA          | NA |
| ASV_16s_17954 | 0.200309266 | 0.733759852  | 3.551111178 | 0.917357576 | NA          | NA |
| ASV_16s_17955 | 0.200309266 | 0.733759852  | 3.551111178 | 0.917357576 | NA          | NA |
| ASV_16s_17956 | 0.200309266 | 0.733759852  | 3.551111178 | 0.917357576 | NA          | NA |
| ASV_16s_17957 | 0.200309266 | 0.733759852  | 3.551111178 | 0.917357576 | NA          | NA |
| ASV_16s_17958 | 0.200309266 | 0.733759852  | 3.551111178 | 0.917357576 | NA          | NA |
| ASV_16s_17959 | 0.200309266 | 0.733759852  | 3.551111178 | 0.917357576 | NA          | NA |
| ASV_16s_17960 | 0.200309266 | 0.733759852  | 3.551111178 | 0.917357576 | NA          | NA |
| ASV_16s_17961 | 0.200309266 | 0.733759852  | 3.551111178 | 0.917357576 | NA          | NA |
| ASV_16s_17962 | 0.196768115 | 0.801923483  | 3.550952392 | 0.769516609 | 0.997742744 | NA |
| ASV_16s_17963 | 0.099224329 | 0.707717792  | 3.551542675 | 0.603959546 | NA          | NA |
| ASV_16s_17964 | 0.099224329 | 0.707717792  | 3.551542675 | 0.603959546 | NA          | NA |
| ASV_16s_17965 | 0.099224329 | 0.707717792  | 3.551542675 | 0.603959546 | NA          | NA |
| ASV_16s_17966 | 0.099224329 | 0.707717792  | 3.551542675 | 0.603959546 | NA          | NA |
| ASV_16s_17967 | 0.18622272  | 0.692820656  | 3.550950006 | 0.841476968 | NA          | NA |
| ASV_16s_17968 | 0.178250651 | 0.692758657  | 3.550967682 | 0.820533008 | 0.997228717 | NA |
| ASV_16s_17969 | 0.191506686 | 0.692857773  | 3.5509391   | 0.854942091 | NA          | NA |
| ASV_16s_17970 | 0.178979411 | 0.692766222  | 3.550966005 | 0.822469669 | 0.997207824 | NA |
| ASV_16s_17971 | 0.176473956 | 0.692746375  | 3.55097184  | 0.815762817 | 0.997279741 | NA |
| ASV_16s_17972 | 0.16394668  | 0.692638184  | 3.551003666 | 0.7811263   | 0.997631828 | NA |
| ASV_16s_17973 | 0.151419405 | 0.692512393  | 3.551040699 | 0.744482999 | NA          | NA |
| ASV_16s_17974 | 0.151419405 | 0.692512393  | 3.551040699 | 0.744482999 | NA          | NA |
| ASV_16s_17975 | 0.151419405 | 0.692512393  | 3.551040699 | 0.744482999 | NA          | NA |

|               |             |              |             |             |             |    |
|---------------|-------------|--------------|-------------|-------------|-------------|----|
| ASV_16s_17976 | 0.175833803 | 0.69274113   | 3.550973383 | 0.811397571 | 0.99732589  | NA |
| ASV_16s_17977 | 0.178053294 | 0.692758861  | 3.550968169 | 0.817369339 | 0.997262626 | NA |
| ASV_16s_17978 | 0.126468269 | 0.295607535  | 3.551845298 | 0.517830767 | NA          | NA |
| ASV_16s_17979 | 0.126468269 | 0.295607535  | 3.551845298 | 0.517830767 | NA          | NA |
| ASV_16s_17980 | 0.126468269 | 0.295607535  | 3.551845298 | 0.517830767 | NA          | NA |
| ASV_16s_17981 | 0.126468269 | 0.295607535  | 3.551845298 | 0.517830767 | NA          | NA |
| ASV_16s_17982 | 0.126468269 | 0.295607535  | 3.551845298 | 0.517830767 | NA          | NA |
| ASV_16s_17983 | 0.126468269 | 0.295607535  | 3.551845298 | 0.517830767 | NA          | NA |
| ASV_16s_17984 | 0.126468269 | 0.295607535  | 3.551845298 | 0.517830767 | NA          | NA |
| ASV_16s_17985 | 0.126468269 | 0.295607535  | 3.551845298 | 0.517830767 | NA          | NA |
| ASV_16s_17986 | 0.126468269 | 0.295607535  | 3.551845298 | 0.517830767 | NA          | NA |
| ASV_16s_17987 | 0.126468269 | 0.295607535  | 3.551845298 | 0.517830767 | NA          | NA |
| ASV_16s_17988 | 0.126468269 | 0.295607535  | 3.551845298 | 0.517830767 | NA          | NA |
| ASV_16s_17989 | 0.126468269 | 0.295607535  | 3.551845298 | 0.517830767 | NA          | NA |
| ASV_16s_17990 | 0.128798538 | -0.00943136  | 3.551479898 | 0.768322629 | 0.997753952 | NA |
| ASV_16s_17991 | 0.129316376 | -0.060792243 | 3.551412042 | 0.795592804 | 0.99748867  | NA |
| ASV_16s_17992 | 0.129316376 | -0.060792243 | 3.551412042 | 0.795592804 | 0.99748867  | NA |
| ASV_16s_17993 | 0.129316376 | -0.060792243 | 3.551412042 | 0.795592804 | 0.99748867  | NA |
| ASV_16s_17994 | 0.129316376 | -0.060792243 | 3.551412042 | 0.795592804 | 0.99748867  | NA |
| ASV_16s_17995 | 0.127549577 | -0.075629641 | 3.5514087   | 0.795518279 | 0.997489422 | NA |
| ASV_16s_17996 | 0.126536718 | -0.070784218 | 3.551421719 | 0.791002725 | 0.997534693 | NA |
| ASV_16s_17997 | 0.129575295 | -0.085254617 | 3.551381933 | 0.804657472 | 0.997396131 | NA |
| ASV_16s_17998 | 0.129575295 | -0.085254617 | 3.551381933 | 0.804657472 | 0.997396131 | NA |
| ASV_16s_17999 | 0.129834214 | -0.109222682 | 3.551352264 | 0.811460378 | 0.99732523  | NA |
| ASV_16s_18000 | 0.12806171  | -0.101104751 | 3.551375958 | 0.803742559 | 0.997405572 | NA |
| ASV_16s_18001 | 0.129834214 | -0.109222682 | 3.551352264 | 0.811460378 | 0.99732523  | NA |
| ASV_16s_18002 | 0.130093133 | -0.132526367 | 3.551325783 | 0.816249666 | 0.997274562 | NA |
| ASV_16s_18003 | 0.130093133 | -0.132526367 | 3.551325783 | 0.816249666 | 0.997274562 | NA |
| ASV_16s_18004 | 0.130093133 | -0.132526367 | 3.551325783 | 0.816249666 | 0.997274562 | NA |
| ASV_16s_18005 | 0.130352051 | -0.155302091 | 3.551302255 | 0.818950111 | 0.997245717 | NA |
| ASV_16s_18006 | 0.130352051 | -0.155302091 | 3.551302255 | 0.818950111 | 0.997245717 | NA |
| ASV_16s_18007 | 0.141807609 | -0.198133906 | 3.551174309 | 0.866519936 | 0.996704358 | NA |
| ASV_16s_18008 | 0.13061097  | -0.177636678 | 3.551281406 | 0.819361403 | 0.997241307 | NA |
| ASV_16s_18009 | 0.126559534 | -0.161429062 | 3.551328635 | 0.803946933 | 0.997403465 | NA |
| ASV_16s_18010 | 0.13061097  | -0.177636678 | 3.551281406 | 0.819361403 | 0.997241307 | NA |
| ASV_16s_18011 | 0.131128808 | -0.221281394 | 3.551246921 | 0.81445102  | 0.997293664 | NA |
| ASV_16s_18012 | 0.131128808 | -0.221281394 | 3.551246921 | 0.81445102  | 0.997293664 | NA |
| ASV_16s_18013 | 0.131128808 | -0.221281394 | 3.551246921 | 0.81445102  | 0.997293664 | NA |
| ASV_16s_18014 | 0.129609519 | -0.215818635 | 3.551262825 | 0.809156071 | 0.997349386 | NA |
| ASV_16s_18015 | 0.138923591 | -0.267517576 | 3.5511583   | 0.834624436 | 0.997074334 | NA |
| ASV_16s_18016 | 0.12658235  | -0.247297006 | 3.551270816 | 0.786764658 | 0.99757669  | NA |
| ASV_16s_18017 | 0.132164483 | -0.307930329 | 3.551196735 | 0.782234247 | 0.997621059 | NA |
| ASV_16s_18018 | 0.128872691 | -0.297686268 | 3.55122801  | 0.771390627 | 0.997725077 | NA |
| ASV_16s_18019 | 0.151011212 | -0.398583248 | 3.551033663 | 0.800284459 | 0.997441049 | NA |
| ASV_16s_18020 | 0.137179608 | -0.364009951 | 3.551143949 | 0.758041435 | 0.997848951 | NA |
| ASV_16s_18021 | 0.045210883 | -0.160587314 | 3.551829781 | 0.26451224  | 0.999934723 | NA |
| ASV_16s_18022 | 0.045210883 | -0.160587314 | 3.551829781 | 0.26451224  | 0.999934723 | NA |
| ASV_16s_18023 | 0.045210883 | -0.160587314 | 3.551829781 | 0.26451224  | 0.999934723 | NA |
| ASV_16s_18024 | 0.045210883 | -0.160587314 | 3.551829781 | 0.26451224  | 0.999934723 | NA |
| ASV_16s_18025 | 0.045210883 | -0.160587314 | 3.551829781 | 0.26451224  | 0.999934723 | NA |
| ASV_16s_18026 | 0.189748175 | -0.618523376 | 3.550826401 | 0.670635585 | 0.998551326 | NA |
| ASV_16s_18027 | 0.172542584 | -0.591049971 | 3.550922013 | 0.639097621 | NA          | NA |
| ASV_16s_18028 | 0.172542584 | -0.591049971 | 3.550922013 | 0.639097621 | NA          | NA |
| ASV_16s_18029 | 0.167906128 | -0.582679693 | 3.550948016 | 0.629769813 | 0.998819101 | NA |
| ASV_16s_18030 | 0.176025152 | -0.597071645 | 3.550902617 | 0.645946401 | 0.998717468 | NA |
| ASV_16s_18031 | 0.169821541 | -0.586161698 | 3.550937144 | 0.633646762 | 0.998795254 | NA |
| ASV_16s_18032 | 0.177940565 | -0.600175903 | 3.550891434 | 0.649657088 | NA          | NA |
| ASV_16s_18033 | 0.177940565 | -0.600175903 | 3.550891434 | 0.649657088 | NA          | NA |
| ASV_16s_18034 | 0.177940565 | -0.600175903 | 3.550891434 | 0.649657088 | NA          | NA |
| ASV_16s_18035 | 0.145706575 | -0.538611812 | 3.551088842 | 0.580686181 | 0.999094148 | NA |
| ASV_16s_18036 | 0.160720667 | -0.569189386 | 3.550990476 | 0.61487908  | NA          | NA |
| ASV_16s_18037 | 0.158169571 | -0.564195121 | 3.551006134 | 0.609457975 | NA          | NA |
| ASV_16s_18038 | 0.158169571 | -0.564195121 | 3.551006134 | 0.609457975 | NA          | NA |
| ASV_16s_18039 | 0.158169571 | -0.564195121 | 3.551006134 | 0.609457975 | NA          | NA |
| ASV_16s_18040 | 0.14054872  | -0.526869055 | 3.551123614 | 0.568334818 | 0.999155814 | NA |
| ASV_16s_18041 | 0.134494753 | -0.511810419 | 3.551161919 | 0.555580808 | NA          | NA |
| ASV_16s_18042 | 0.134494753 | -0.511810419 | 3.551161919 | 0.555580808 | NA          | NA |

|               |             |              |             |             |             |    |
|---------------|-------------|--------------|-------------|-------------|-------------|----|
| ASV_16s_18043 | 0.134494753 | -0.511810419 | 3.551161919 | 0.555580808 | NA          | NA |
| ASV_16s_18044 | 0.134494753 | -0.511810419 | 3.551161919 | 0.555580808 | NA          | NA |
| ASV_16s_18045 | 0.134494753 | -0.511810419 | 3.551161919 | 0.555580808 | NA          | NA |
| ASV_16s_18046 | 0.134494753 | -0.511810419 | 3.551161919 | 0.555580808 | NA          | NA |
| ASV_16s_18047 | 0.134494753 | -0.511810419 | 3.551161919 | 0.555580808 | NA          | NA |
| ASV_16s_18048 | 0.132469035 | -0.506646417 | 3.551175176 | 0.550589237 | 0.999239354 | NA |
| ASV_16s_18049 | 0.130443316 | -0.501407337 | 3.551188754 | 0.545548408 | 0.999262021 | NA |
| ASV_16s_18050 | 0.126645095 | -0.491334957 | 3.551215002 | 0.535963085 | NA          | NA |
| ASV_16s_18051 | 0.126645095 | -0.491334957 | 3.551215002 | 0.535963085 | NA          | NA |
| ASV_16s_18052 | 0.126645095 | -0.491334957 | 3.551215002 | 0.535963085 | NA          | NA |
| ASV_16s_18053 | 0.126645095 | -0.491334957 | 3.551215002 | 0.535963085 | NA          | NA |
| ASV_16s_18054 | 0.040349937 | -0.155222436 | 3.551105846 | 0.179470478 | NA          | NA |
| ASV_16s_18055 | 0.086070019 | 0.253651901  | 3.550842608 | 0.332583964 | 0.999858282 | NA |
| ASV_16s_18056 | 0.081976254 | 0.220199778  | 3.550929375 | 0.38028447  | NA          | NA |
| ASV_16s_18057 | 0.076477844 | 0.330253871  | 3.550910137 | 0.508470358 | 0.999414871 | NA |
| ASV_16s_18058 | 0.056249206 | 0.220320925  | 3.551089391 | 0.25104297  | NA          | NA |
| ASV_16s_18060 | 0.171772084 | 0.687673744  | 3.550940734 | 0.778282501 | 0.997659322 | NA |
| ASV_16s_18061 | 0.140415977 | -0.209185198 | 3.551383742 | 0.76125343  | 0.997819563 | NA |
| ASV_16s_18062 | 0.136170963 | 0.107391935  | 3.551455879 | 0.734765968 | 0.998054118 | NA |
| ASV_16s_18063 | 0.149497482 | -0.512676323 | 3.55126176  | 0.614809645 | 0.998908151 | NA |
| ASV_16s_18064 | 0.163416795 | -0.551649029 | 3.551043675 | 0.634310033 | 0.998791143 | NA |
| ASV_16s_18065 | 0.13265017  | 0.04370323   | 3.551336544 | 0.714379921 | 0.998222792 | NA |
| ASV_16s_18066 | 0.149492897 | 0.195319105  | 3.551199922 | 0.784618362 | 0.997597777 | NA |
| ASV_16s_18067 | 0.1550487   | 0.240715392  | 3.551130621 | 0.828127916 | 0.99714619  | NA |
| ASV_16s_18068 | 0.175797875 | -0.501579826 | 3.551309022 | 0.623884312 | NA          | NA |
| ASV_16s_18069 | 0.161950992 | -0.539764503 | 3.550946641 | 0.688265606 | 0.998424283 | NA |
| ASV_16s_18070 | 0.179200619 | -0.579331772 | 3.550768567 | 0.750211939 | 0.997919487 | NA |
| ASV_16s_18071 | 0.17413314  | -0.499868505 | 3.551320422 | 0.624324041 | NA          | NA |
| ASV_16s_18072 | 0.15185019  | -0.510984365 | 3.551046527 | 0.664743588 | 0.998592208 | NA |
| ASV_16s_18073 | 0.140443341 | 0.409183523  | 3.551352228 | 0.719658016 | 0.998180092 | NA |
| ASV_16s_18074 | 0.154927416 | -0.508864765 | 3.550994119 | 0.686658665 | 0.998436158 | NA |
| ASV_16s_18075 | 0.159391241 | -0.498646708 | 3.550916493 | 0.713922395 | 0.998226462 | NA |
| ASV_16s_18076 | 0.15088133  | 0.398695687  | 3.551259601 | 0.786491498 | 0.99757938  | NA |
| ASV_16s_18077 | 0.166623    | -0.494402668 | 3.550839818 | 0.758589311 | 0.997843957 | NA |
| ASV_16s_18078 | 0.180948479 | -0.948188351 | 3.550808784 | 0.406406875 | 0.999722182 | NA |
| ASV_16s_18079 | 0.143046489 | -0.003675188 | 3.550974128 | 0.66428092  | 0.998595385 | NA |
| ASV_16s_18080 | 0.150826007 | 0.67691496   | 3.551429866 | 0.711237837 | 0.998247893 | NA |
| ASV_16s_18081 | 0.138030771 | -0.115190519 | 3.551267556 | 0.677084275 | 0.998505681 | NA |
| ASV_16s_18082 | 0.160458748 | -0.036468907 | 3.551356148 | 0.50964235  | 0.999410403 | NA |
| ASV_16s_18083 | 0.167253814 | -0.449547409 | 3.550816095 | 0.783320773 | 0.997610467 | NA |
| ASV_16s_18084 | 0.125752848 | -0.096890575 | 3.551283329 | 0.652893158 | 0.998672085 | NA |
| ASV_16s_18085 | 0.165256943 | -0.425069679 | 3.550831076 | 0.782746594 | 0.998616069 | NA |
| ASV_16s_18086 | 0.136729365 | 1.03035781   | 3.550556094 | 0.340783238 | 0.99984616  | NA |
| ASV_16s_18087 | 0.164974601 | -0.1141255   | 3.551173211 | 0.779545815 | 0.997647134 | NA |
| ASV_16s_18088 | 0.153917661 | -0.39905252  | 3.550927788 | 0.742812529 | 0.997984726 | NA |
| ASV_16s_18089 | 0.155635552 | -0.378771963 | 3.551256426 | 0.631560473 | 0.998808127 | NA |
| ASV_16s_18090 | 0.145100039 | 0.048997172  | 3.551146094 | 0.60403718  | 0.998969401 | NA |
| ASV_16s_18091 | 0.166196059 | -0.372046204 | 3.550840718 | 0.797075733 | 0.997473682 | NA |
| ASV_16s_18092 | 0.164346238 | -0.372039658 | 3.550852162 | 0.789551542 | 0.997549127 | NA |
| ASV_16s_18093 | 0.166755954 | -0.383154084 | 3.550832239 | 0.797803025 | 0.99746631  | NA |
| ASV_16s_18094 | 0.167999187 | 0.183481724  | 3.549957741 | 0.761615654 | 0.997816232 | NA |
| ASV_16s_18095 | 0.13539335  | -0.307762382 | 3.55136163  | 0.654147171 | 0.998663779 | NA |
| ASV_16s_18096 | 0.164444392 | -0.338820279 | 3.550869599 | 0.792828102 | 0.997516458 | NA |
| ASV_16s_18097 | 0.156009624 | -0.314892553 | 3.550913638 | 0.763352889 | 0.997800211 | NA |
| ASV_16s_18098 | 0.138263119 | 0.966974982  | 3.551673557 | 0.50658149  | 0.999422024 | NA |
| ASV_16s_18099 | 0.158864485 | 0.468067253  | 3.55110838  | 0.775498457 | 0.997686033 | NA |
| ASV_16s_18100 | 0.155088904 | -0.28526155  | 3.550951932 | 0.759850135 | 0.997832435 | NA |
| ASV_16s_18101 | 0.128118467 | -0.540549719 | 3.551055309 | 0.45794283  | 0.999586372 | NA |
| ASV_16s_18102 | 0.142754388 | 0.164057803  | 3.551039784 | 0.703281323 | 0.998310397 | NA |
| ASV_16s_18103 | 0.16388018  | -0.165718531 | 3.550953601 | 0.793209212 | 0.997512639 | NA |
| ASV_16s_18104 | 0.143147704 | 0.209474398  | 3.551047062 | 0.704876475 | NA          | NA |
| ASV_16s_18105 | 0.100156366 | -0.006712276 | 3.551841784 | 0.46400489  | 0.999567899 | NA |
| ASV_16s_18106 | 0.156523689 | 0.13644261   | 3.550553317 | 0.622651938 | NA          | NA |
| ASV_16s_18107 | 0.179822339 | 1.104411167  | 3.551158344 | 0.592815646 | 0.999030702 | NA |
| ASV_16s_18108 | 0.154831518 | -0.067910508 | 3.551222799 | 0.706599449 | 0.998284514 | NA |
| ASV_16s_18109 | 0.15560688  | 0.688531578  | 3.551067093 | 0.734525776 | 0.998056165 | NA |
| ASV_16s_18110 | 0.166137549 | 1.080133511  | 3.551242569 | 0.568314529 | NA          | NA |

|               |             |              |             |             |             |    |
|---------------|-------------|--------------|-------------|-------------|-------------|----|
| ASV_16s_18111 | 0.166137549 | 1.080133511  | 3.551242569 | 0.568314529 | NA          | NA |
| ASV_16s_18112 | 0.156889885 | 1.438744499  | 3.551076785 | 0.319387618 | 0.999876377 | NA |
| ASV_16s_18113 | 0.140208524 | 1.096648832  | 3.551314585 | 0.5165026   | NA          | NA |
| ASV_16s_18114 | 0.140208524 | 1.096648832  | 3.551314585 | 0.5165026   | NA          | NA |
| ASV_16s_18115 | 0.1448975   | 0.376503433  | 3.550961082 | 0.82789899  | 0.997148701 | NA |
| ASV_16s_18116 | 0.176428345 | 0.746517844  | 3.551239754 | 0.493558172 | NA          | NA |
| ASV_16s_18117 | 0.171622885 | 1.476777398  | 3.550887389 | 0.335648536 | 0.999853832 | NA |
| ASV_16s_18118 | 0.144750287 | 1.107927678  | 3.551288615 | 0.52703058  | NA          | NA |
| ASV_16s_18119 | 0.144750287 | 1.107927678  | 3.551288615 | 0.52703058  | NA          | NA |
| ASV_16s_18120 | 0.144750287 | 1.107927678  | 3.551288615 | 0.52703058  | NA          | NA |
| ASV_16s_18121 | 0.168444607 | 0.902110097  | 3.551102707 | 0.86596595  | 0.996711031 | NA |
| ASV_16s_18122 | 0.152546548 | 1.404922944  | 3.551060965 | 0.313057969 | 0.99988446  | NA |
| ASV_16s_18123 | 0.226987172 | 1.64905401   | 3.550505865 | 0.398292208 | 0.999740306 | NA |
| ASV_16s_18124 | 0.137233219 | 0.34585835   | 3.551860555 | 0.5451387   | NA          | NA |
| ASV_16s_18125 | 0.157613138 | 0.342281595  | 3.552028094 | 0.336323879 | 0.999852838 | NA |
| ASV_16s_18126 | 0.166137549 | 0.357086089  | 3.551715747 | 0.608062851 | NA          | NA |
| ASV_16s_18127 | 0.183755253 | 0.365868471  | 3.55161675  | 0.641828509 | NA          | NA |
| ASV_16s_18128 | 0.240705254 | 0.384876584  | 3.551270829 | 0.732376293 | NA          | NA |
| ASV_16s_18129 | 0.197318379 | 1.111283615  | 3.551127446 | 0.637852098 | 0.998769025 | NA |
| ASV_16s_18130 | 0.136523216 | 0.348370318  | 3.551746623 | 0.336757174 | NA          | NA |
| ASV_16s_18131 | 0.154846043 | -0.294693771 | 3.550954588 | 0.839924144 | 0.997014846 | NA |
| ASV_16s_18132 | 0.117284635 | 0.347568083  | 3.551821164 | 0.299862477 | 0.999900118 | NA |
| ASV_16s_18133 | 0.143996952 | 0.348126893  | 3.551834458 | 0.560895251 | NA          | NA |
| ASV_16s_18134 | 0.143996952 | 0.348126893  | 3.551834458 | 0.560895251 | NA          | NA |
| ASV_16s_18135 | 0.143996952 | 0.348126893  | 3.551834458 | 0.560895251 | NA          | NA |
| ASV_16s_18136 | 0.134390324 | 0.343821032  | 3.552021096 | 0.309976403 | 0.999888259 | NA |
| ASV_16s_18137 | 0.186918005 | 0.348347666  | 3.551992916 | 0.371043459 | 0.99979521  | NA |
| ASV_16s_18138 | 0.252273674 | 0.377451402  | 3.551442545 | 0.480778425 | NA          | NA |
| ASV_16s_18139 | 0.245266476 | 0.385721191  | 3.55124475  | 0.738836076 | NA          | NA |
| ASV_16s_18140 | 0.188026691 | 0.353914956  | 3.551716276 | 0.395175181 | 0.999747046 | NA |
| ASV_16s_18141 | 0.177940565 | -0.530226931 | 3.550840413 | 0.633611787 | NA          | NA |
| ASV_16s_18142 | 0.184756165 | 0.058400825  | 3.551385359 | 0.539539753 | NA          | NA |
| ASV_16s_18143 | 0.276737755 | -0.570710811 | 3.550360134 | 0.794663956 | NA          | NA |
| ASV_16s_18144 | 0.106210489 | -0.404141074 | 3.551489341 | 0.472022397 | NA          | NA |
| ASV_16s_18145 | 0.106210489 | -0.404141074 | 3.551489341 | 0.472022397 | NA          | NA |
| ASV_16s_18146 | 0.106210489 | -0.404141074 | 3.551489341 | 0.472022397 | NA          | NA |
| ASV_16s_18147 | 0.156245431 | -0.507879563 | 3.551055381 | 0.591885681 | NA          | NA |
| ASV_16s_18148 | 0.139022787 | -0.48164389  | 3.551218438 | 0.554830977 | NA          | NA |
| ASV_16s_18149 | 0.157470502 | 1.170519016  | 3.550984364 | 0.49621031  | NA          | NA |
| ASV_16s_18150 | 0.157470502 | 1.170519016  | 3.550984364 | 0.49621031  | NA          | NA |
| ASV_16s_18151 | 0.132836586 | 1.115958801  | 3.551109627 | 0.440520378 | 0.999636448 | NA |
| ASV_16s_18152 | 0.140893069 | 1.135474429  | 3.551067703 | 0.459635429 | NA          | NA |
| ASV_16s_18153 | 0.140893069 | 1.135474429  | 3.551067703 | 0.459635429 | NA          | NA |
| ASV_16s_18154 | 0.140893069 | 1.135474429  | 3.551067703 | 0.459635429 | NA          | NA |
| ASV_16s_18155 | 0.140893069 | 1.135474429  | 3.551067703 | 0.459635429 | NA          | NA |
| ASV_16s_18156 | 0.178971342 | 0.030780268  | 3.550532894 | 0.911448199 | 0.996133389 | NA |
| ASV_16s_18157 | 0.165935749 | -0.064685582 | 3.551052239 | 0.667697502 | 0.99857181  | NA |
| ASV_16s_18158 | 0.161557456 | 0.375155655  | 3.551382244 | 0.53389095  | NA          | NA |
| ASV_16s_18159 | 0.146687548 | 0.368182965  | 3.551468531 | 0.502741005 | NA          | NA |
| ASV_16s_18160 | 0.146687548 | 0.368182965  | 3.551468531 | 0.502741005 | NA          | NA |
| ASV_16s_18161 | 0.146687548 | 0.368182965  | 3.551468531 | 0.502741005 | NA          | NA |
| ASV_16s_18162 | 0.121088839 | 0.356737717  | 3.551599607 | 0.442816429 | NA          | NA |
| ASV_16s_18163 | 0.121088839 | 0.356737717  | 3.551599607 | 0.442816429 | NA          | NA |
| ASV_16s_18164 | 0.121088839 | 0.356737717  | 3.551599607 | 0.442816429 | NA          | NA |
| ASV_16s_18165 | 0.181298087 | 0.714095429  | 3.55080609  | 0.881531682 | 0.996520163 | NA |
| ASV_16s_18166 | 0.131013832 | 0.36132896   | 3.55155695  | 0.467128737 | NA          | NA |
| ASV_16s_18167 | 0.131013832 | 0.36132896   | 3.55155695  | 0.467128737 | NA          | NA |
| ASV_16s_18168 | 0.25289561  | 0.413251611  | 3.550854422 | 0.682677165 | NA          | NA |
| ASV_16s_18169 | 0.183032923 | 0.326920449  | 3.551315129 | 0.474335515 | 0.999535134 | NA |
| ASV_16s_18170 | 0.183794436 | 0.385191038  | 3.551248934 | 0.576184605 | NA          | NA |
| ASV_16s_18171 | 0.073609034 | -0.321635113 | 3.551450342 | 0.309512275 | NA          | NA |
| ASV_16s_18172 | 0.073609034 | -0.321635113 | 3.551450342 | 0.309512275 | NA          | NA |
| ASV_16s_18173 | 0.172609359 | 0.149732094  | 3.55034245  | 0.863627688 | 0.996739099 | NA |
| ASV_16s_18174 | 0.141223475 | -0.495417367 | 3.550857213 | 0.492856133 | NA          | NA |
| ASV_16s_18175 | 0.222402594 | -0.544538501 | 3.550174907 | 0.635926902 | NA          | NA |
| ASV_16s_18176 | 0.089396484 | -0.37841442  | 3.551326844 | 0.359620963 | NA          | NA |
| ASV_16s_18177 | 0.089396484 | -0.37841442  | 3.551326844 | 0.359620963 | NA          | NA |

|               |             |              |             |             |             |    |
|---------------|-------------|--------------|-------------|-------------|-------------|----|
| ASV_16s_18178 | 0.089396484 | -0.37841442  | 3.551326844 | 0.359620963 | NA          | NA |
| ASV_16s_18179 | 0.146687548 | -0.502635694 | 3.550801477 | 0.504597902 | NA          | NA |
| ASV_16s_18180 | 0.161588011 | 1.178138067  | 3.550963099 | 0.504822961 | NA          | NA |
| ASV_16s_18181 | 0.064948901 | 0.890213214  | 3.551632302 | 0.250501729 | NA          | NA |
| ASV_16s_18182 | 0.064948901 | 0.890213214  | 3.551632302 | 0.250501729 | NA          | NA |
| ASV_16s_18183 | 0.064948901 | 0.890213214  | 3.551632302 | 0.250501729 | NA          | NA |
| ASV_16s_18184 | 0.064948901 | 0.890213214  | 3.551632302 | 0.250501729 | NA          | NA |
| ASV_16s_18185 | 0.146687548 | -0.078379865 | 3.550886937 | 0.787042523 | NA          | NA |
| ASV_16s_18186 | 0.146687548 | -0.078379865 | 3.550886937 | 0.787042523 | NA          | NA |
| ASV_16s_18187 | 0.146687548 | -0.078379865 | 3.550886937 | 0.787042523 | NA          | NA |
| ASV_16s_18188 | 0.142740599 | -0.078345387 | 3.55089718  | 0.77437895  | 0.997696717 | NA |
| ASV_16s_18189 | 0.125082141 | -0.078166508 | 3.550950865 | 0.714220424 | NA          | NA |
| ASV_16s_18190 | 0.125082141 | -0.078166508 | 3.550950865 | 0.714220424 | NA          | NA |
| ASV_16s_18191 | 0.125082141 | -0.078166508 | 3.550950865 | 0.714220424 | NA          | NA |
| ASV_16s_18192 | 0.125082141 | -0.078166508 | 3.550950865 | 0.714220424 | NA          | NA |
| ASV_16s_18193 | 0.125082141 | -0.078166508 | 3.550950865 | 0.714220424 | NA          | NA |
| ASV_16s_18194 | 0.125082141 | -0.078166508 | 3.550950865 | 0.714220424 | NA          | NA |
| ASV_16s_18195 | 0.125082141 | -0.078166508 | 3.550950865 | 0.714220424 | NA          | NA |
| ASV_16s_18196 | 0.125082141 | -0.078166508 | 3.550950865 | 0.714220424 | NA          | NA |
| ASV_16s_18197 | 0.125082141 | -0.078166508 | 3.550950865 | 0.714220424 | NA          | NA |
| ASV_16s_18198 | 0.125082141 | -0.078166508 | 3.550950865 | 0.714220424 | NA          | NA |
| ASV_16s_18199 | 0.125082141 | -0.078166508 | 3.550950865 | 0.714220424 | NA          | NA |
| ASV_16s_18200 | 0.125082141 | -0.078166508 | 3.550950865 | 0.714220424 | NA          | NA |
| ASV_16s_18201 | 0.134915436 | -0.078271121 | 3.55091925  | 0.748441153 | 0.997935225 | NA |
| ASV_16s_18202 | 0.141125939 | -0.078330733 | 3.550901534 | 0.769121479 | NA          | NA |
| ASV_16s_18203 | 0.141125939 | -0.078330733 | 3.550901534 | 0.769121479 | NA          | NA |
| ASV_16s_18204 | 0.086217721 | 0.220186683  | 3.550912112 | 0.399421389 | 0.999737834 | NA |
| ASV_16s_18205 | 0.086924632 | 0.220184625  | 3.550909398 | 0.402562082 | 0.999730874 | NA |
| ASV_16s_18206 | 0.088338454 | 0.220180609  | 3.550904098 | 0.408807488 | 0.999716658 | NA |
| ASV_16s_18207 | 0.093119329 | 0.220167937  | 3.550887359 | 0.429493756 | NA          | NA |
| ASV_16s_18208 | 0.093119329 | 0.220167937  | 3.550887359 | 0.429493756 | NA          | NA |
| ASV_16s_18209 | 0.093119329 | 0.220167937  | 3.550887359 | 0.429493756 | NA          | NA |
| ASV_16s_18210 | 0.158653838 | 0.310947679  | 3.551000136 | 0.804208321 | 0.997400769 | NA |
| ASV_16s_18211 | 0.138579489 | 0.310951596  | 3.551059434 | 0.740919322 | NA          | NA |
| ASV_16s_18212 | 0.138579489 | 0.310951596  | 3.551059434 | 0.740919322 | NA          | NA |
| ASV_16s_18213 | 0.158426654 | 0.310947717  | 3.551000724 | 0.803527959 | NA          | NA |
| ASV_16s_18214 | 0.142146177 | 0.687425298  | 3.551020666 | 0.691236218 | NA          | NA |
| ASV_16s_18215 | 0.112219291 | 0.07348456   | 3.550861585 | 0.513531074 | NA          | NA |
| ASV_16s_18216 | 0.164502393 | -0.418939112 | 3.550798041 | 0.634654127 | NA          | NA |
| ASV_16s_18217 | 0.202488683 | 1.396179021  | 3.551102104 | 0.389886805 | 0.999758204 | NA |
| ASV_16s_18218 | 0.160795652 | 0.698793113  | 3.550870568 | 0.866721983 | NA          | NA |
| ASV_16s_18219 | 0.130037324 | -0.067039037 | 3.551007271 | 0.824424134 | 0.997186634 | NA |
| ASV_16s_18220 | 0.188361006 | 1.641324536  | 3.550909689 | 0.244024909 | 0.99995038  | NA |
| ASV_16s_18221 | 0.149006755 | 0.647400902  | 3.551452059 | 0.616131429 | 0.998900471 | NA |
| ASV_16s_18222 | 0.19130215  | 0.309882657  | 3.550830759 | 0.719687975 | 0.998179848 | NA |
| ASV_16s_18223 | 0.130532842 | -0.066724514 | 3.551019962 | 0.832223614 | 0.997101025 | NA |
| ASV_16s_18224 | 0.130532842 | -0.066724514 | 3.551019962 | 0.832223614 | 0.997101025 | NA |
| ASV_16s_18225 | 0.131523879 | -0.067102652 | 3.551036727 | 0.843652499 | 0.996972525 | NA |
| ASV_16s_18226 | 0.141956558 | 0.639000593  | 3.55066656  | 0.691180056 | 0.998402591 | NA |
| ASV_16s_18227 | 0.101004337 | 0.097808595  | 3.5516661   | 0.584120866 | 0.999076475 | NA |
| ASV_16s_18228 | 0.140729515 | -0.06345777  | 3.551042709 | 0.878748081 | 0.996554812 | NA |
| ASV_16s_18229 | 0.142860373 | -0.061120174 | 3.551027128 | 0.883479671 | 0.996495782 | NA |
| ASV_16s_18230 | 0.155190355 | 0.332783651  | 3.551371875 | 0.53168482  | 0.999321995 | NA |
| ASV_16s_18231 | 0.231745474 | 1.165964561  | 3.550839062 | 0.683115965 | NA          | NA |
| ASV_16s_18232 | 0.135489682 | 1.081723245  | 3.551496456 | 0.405129574 | 0.999725091 | NA |
| ASV_16s_18233 | 0.062620662 | 0.289565306  | 3.55187586  | 0.325253177 | 0.999868545 | NA |
| ASV_16s_18234 | 0.062620662 | 0.289565306  | 3.55187586  | 0.325253177 | 0.999868545 | NA |
| ASV_16s_18235 | 0.207430719 | -0.539018428 | 3.551096688 | 0.6881988   | NA          | NA |
| ASV_16s_18236 | 0.280028582 | -0.598399976 | 3.55082727  | 0.789790555 | NA          | NA |
| ASV_16s_18237 | 0.124308623 | 0.913525512  | 3.551508553 | 0.457560953 | NA          | NA |
| ASV_16s_18238 | 0.256137588 | -0.17276192  | 3.550129069 | 1.015898311 | NA          | NA |
| ASV_16s_18239 | 0.203283314 | 0.333375281  | 3.550994935 | 0.862962263 | 0.996747058 | NA |
| ASV_16s_18240 | 0.18421514  | 1.215589179  | 3.550857521 | 0.549076964 | NA          | NA |
| ASV_16s_18241 | 0.104971791 | -0.077888267 | 3.551033817 | 0.637895304 | NA          | NA |
| ASV_16s_18242 | 0.104971791 | -0.077888267 | 3.551033817 | 0.637895304 | NA          | NA |
| ASV_16s_18243 | 0.104971791 | -0.077888267 | 3.551033817 | 0.637895304 | NA          | NA |
| ASV_16s_18244 | 0.134884804 | -0.094009538 | 3.550929589 | 0.817850073 | 0.997257491 | NA |

|               |             |              |             |             |             |    |
|---------------|-------------|--------------|-------------|-------------|-------------|----|
| ASV_16s_18245 | 0.134576522 | -0.043927186 | 3.55106738  | 0.786569345 | NA          | NA |
| ASV_16s_18246 | 0.135922191 | -0.02245309  | 3.551072036 | 0.782123548 | NA          | NA |
| ASV_16s_18247 | 0.326532041 | -0.029238798 | 3.550768562 | 1.250146998 | NA          | NA |
| ASV_16s_18248 | 0.246702332 | 0.289348602  | 3.550873881 | 1.69539397  | 0.974765042 | NA |
| ASV_16s_18249 | 0.229850318 | -0.485454667 | 3.550429352 | 0.774594278 | 0.997694665 | NA |
| ASV_16s_18250 | 0.218936311 | 0.420119937  | 3.550942009 | 1.46612615  | 0.983459255 | NA |
| ASV_16s_18251 | 0.241089147 | 0.661180322  | 3.550313765 | 1.144861017 | 0.99214155  | NA |
| ASV_16s_18252 | 0.231709697 | -0.028931499 | 3.550870107 | 1.068064205 | NA          | NA |
| ASV_16s_18253 | 0.231091952 | 0.150837768  | 3.550875624 | 1.475451368 | 0.983147383 | NA |
| ASV_16s_18254 | 0.195951559 | 0.379129224  | 3.550678978 | 1.009341759 | NA          | NA |
| ASV_16s_18255 | 0.149536598 | -0.075221787 | 3.551137754 | 1.015946984 | 0.994567171 | NA |
| ASV_16s_18256 | 0.138495564 | -0.028228305 | 3.551104173 | 0.819506387 | NA          | NA |
| ASV_16s_18257 | 0.130766485 | 0.212445319  | 3.550974771 | 0.786045614 | NA          | NA |
| ASV_16s_18258 | 0.113501784 | -0.072829179 | 3.551042923 | 0.695511197 | NA          | NA |
| ASV_16s_18259 | 0.113501784 | -0.072829179 | 3.551042923 | 0.695511197 | NA          | NA |
| ASV_16s_18260 | 0.113501784 | -0.072829179 | 3.551042923 | 0.695511197 | NA          | NA |
| ASV_16s_18261 | 0.113501784 | -0.072829179 | 3.551042923 | 0.695511197 | NA          | NA |
| ASV_16s_18262 | 0.165468118 | 0.374654528  | 3.550955589 | 0.922362649 | 0.995985637 | NA |
| ASV_16s_18263 | 0.192520254 | 0.301789039  | 3.550590378 | 1.081097601 | 0.993412134 | NA |
| ASV_16s_18264 | 0.140828561 | -0.073188404 | 3.550940896 | 0.792312047 | NA          | NA |
| ASV_16s_18265 | 0.157985002 | 0.360278795  | 3.551235215 | 0.863872914 | NA          | NA |
| ASV_16s_18266 | 0.157985002 | 0.360278795  | 3.551235215 | 0.863872914 | NA          | NA |
| ASV_16s_18267 | 0.2594338   | 0.360354996  | 3.550985801 | 1.110230745 | NA          | NA |
| ASV_16s_18268 | 0.201242186 | 0.354094891  | 3.551445463 | 0.729294022 | 0.998100391 | NA |
| ASV_16s_18269 | 0.203168569 | 0.338379657  | 3.55112845  | 0.738282397 | 0.998023991 | NA |
| ASV_16s_18270 | 0.140443209 | 0.360254631  | 3.551314456 | 0.808709888 | NA          | NA |
| ASV_16s_18271 | 0.140443209 | 0.360254631  | 3.551314456 | 0.808709888 | NA          | NA |
| ASV_16s_18272 | 0.140443209 | 0.360254631  | 3.551314456 | 0.808709888 | NA          | NA |
| ASV_16s_18273 | 0.140443209 | 0.360254631  | 3.551314456 | 0.808709888 | NA          | NA |
| ASV_16s_18274 | 0.140443209 | 0.360254631  | 3.551314456 | 0.808709888 | NA          | NA |
| ASV_16s_18275 | 0.140443209 | 0.360254631  | 3.551314456 | 0.808709888 | NA          | NA |
| ASV_16s_18276 | 0.140443209 | 0.360254631  | 3.551314456 | 0.808709888 | NA          | NA |
| ASV_16s_18277 | 0.140443209 | 0.360254631  | 3.551314456 | 0.808709888 | NA          | NA |
| ASV_16s_18278 | 0.140443209 | 0.360254631  | 3.551314456 | 0.808709888 | NA          | NA |
| ASV_16s_18279 | 0.140443209 | 0.360254631  | 3.551314456 | 0.808709888 | NA          | NA |
| ASV_16s_18280 | 0.140443209 | 0.360254631  | 3.551314456 | 0.808709888 | NA          | NA |
| ASV_16s_18281 | 0.140443209 | 0.360254631  | 3.551314456 | 0.808709888 | NA          | NA |
| ASV_16s_18282 | 0.181971505 | 0.315939755  | 3.55098137  | 0.893092008 | NA          | NA |
| ASV_16s_18283 | 0.172865967 | 0.315939782  | 3.551002004 | 0.868136215 | 0.996684839 | NA |
| ASV_16s_18284 | 0.162622238 | 0.315939817  | 3.551027954 | 0.838089815 | 0.997035524 | NA |
| ASV_16s_18285 | 0.157957864 | 0.315939834  | 3.551040873 | 0.82409494  | 0.99719021  | NA |
| ASV_16s_18286 | 0.157295612 | 0.315939923  | 3.55104276  | 0.822930295 | NA          | NA |
| ASV_16s_18287 | 0.1909364   | 0.315939732  | 3.550963019 | 0.914568024 | 0.996091522 | NA |
| ASV_16s_18288 | 0.152162678 | 0.315939858  | 3.551058012 | 0.807237346 | 0.997369391 | NA |
| ASV_16s_18289 | 0.222479418 | 0.315939667  | 3.550910025 | 0.998370293 | 0.994854783 | NA |
| ASV_16s_18290 | 0.151136091 | 0.315939862  | 3.551061186 | 0.80405127  | 0.997402389 | NA |
| ASV_16s_18291 | 0.150109504 | 0.315939867  | 3.551064403 | 0.800848074 | 0.997435289 | NA |
| ASV_16s_18292 | 0.190575795 | 0.796782978  | 3.550935318 | 1.001088749 | 0.994810954 | NA |
| ASV_16s_18293 | 0.148398526 | 0.315939874  | 3.551069862 | 0.79547748  | 0.997489834 | NA |
| ASV_16s_18294 | 0.170075493 | 0.315939791  | 3.551008814 | 0.856840341 | 0.996819686 | NA |
| ASV_16s_18295 | 0.184434684 | 0.315939749  | 3.550976202 | 0.897064947 | 0.996322648 | NA |
| ASV_16s_18296 | 0.146687548 | 0.315939975  | 3.551075449 | 0.790057758 | NA          | NA |
| ASV_16s_18297 | 0.146687548 | 0.315939975  | 3.551075449 | 0.790057758 | NA          | NA |
| ASV_16s_18298 | 0.146687548 | 0.315939975  | 3.551075449 | 0.790057758 | NA          | NA |
| ASV_16s_18299 | 0.146687548 | 0.315939975  | 3.551075449 | 0.790057758 | NA          | NA |
| ASV_16s_18300 | 0.146687548 | 0.315939975  | 3.551075449 | 0.790057758 | NA          | NA |
| ASV_16s_18301 | 0.146687548 | 0.315939975  | 3.551075449 | 0.790057758 | NA          | NA |
| ASV_16s_18302 | 0.146687548 | 0.315939975  | 3.551075449 | 0.790057758 | NA          | NA |
| ASV_16s_18303 | 0.146687548 | 0.315939975  | 3.551075449 | 0.790057758 | NA          | NA |
| ASV_16s_18304 | 0.276160199 | 0.315939597  | 3.550847485 | 1.107343784 | NA          | NA |
| ASV_16s_18305 | 0.197507611 | 0.596102872  | 3.550689238 | 0.701821894 | NA          | NA |
| ASV_16s_18306 | 0.139695984 | 0.687399958  | 3.551028783 | 0.683478139 | NA          | NA |
| ASV_16s_18307 | 0.21850678  | 1.128495799  | 3.550825549 | 0.690410219 | 0.99840834  | NA |
| ASV_16s_18308 | 0.210981494 | 1.142675262  | 3.551037953 | 0.695732223 | 0.998368314 | NA |
| ASV_16s_18309 | 0.20533753  | 1.059785145  | 3.551210107 | 0.709078951 | NA          | NA |
| ASV_16s_18310 | 0.303915292 | 0.734385638  | 3.550929998 | 1.129428634 | 0.992462079 | NA |
| ASV_16s_18311 | 0.29931321  | 0.734366903  | 3.550935419 | 1.120598644 | 0.99264171  | NA |

|               |             |              |             |             |             |    |
|---------------|-------------|--------------|-------------|-------------|-------------|----|
| ASV_16s_18312 | 0.229315935 | 0.733991645  | 3.551044486 | 0.983840166 | NA          | NA |
| ASV_16s_18313 | 0.213323344 | 0.979725669  | 3.551189892 | 0.789658655 | NA          | NA |
| ASV_16s_18314 | 0.209538075 | 1.121272869  | 3.550994136 | 0.705370146 | 0.998294134 | NA |
| ASV_16s_18315 | 0.194049601 | 0.733700866  | 3.551128969 | 0.901822016 | NA          | NA |
| ASV_16s_18316 | 0.194049601 | 0.733700866  | 3.551128969 | 0.901822016 | NA          | NA |
| ASV_16s_18317 | 0.194049601 | 0.733700866  | 3.551128969 | 0.901822016 | NA          | NA |
| ASV_16s_18318 | 0.194049601 | 0.733700866  | 3.551128969 | 0.901822016 | NA          | NA |
| ASV_16s_18319 | 0.194049601 | 0.733700866  | 3.551128969 | 0.901822016 | NA          | NA |
| ASV_16s_18320 | 0.194049601 | 0.733700866  | 3.551128969 | 0.901822016 | NA          | NA |
| ASV_16s_18321 | 0.194049601 | 0.733700866  | 3.551128969 | 0.901822016 | NA          | NA |
| ASV_16s_18322 | 0.194049601 | 0.733700866  | 3.551128969 | 0.901822016 | NA          | NA |
| ASV_16s_18323 | 0.194049601 | 0.733700866  | 3.551128969 | 0.901822016 | NA          | NA |
| ASV_16s_18324 | 0.194049601 | 0.733700866  | 3.551128969 | 0.901822016 | NA          | NA |
| ASV_16s_18325 | 0.096123569 | 0.704560554  | 3.551560016 | 0.591461848 | NA          | NA |
| ASV_16s_18326 | 0.096123569 | 0.704560554  | 3.551560016 | 0.591461848 | NA          | NA |
| ASV_16s_18327 | 0.18040326  | 0.69277736   | 3.550962783 | 0.826185575 | NA          | NA |
| ASV_16s_18328 | 0.190590244 | 0.692850141  | 3.550940985 | 0.851710512 | 0.996879722 | NA |
| ASV_16s_18329 | 0.183375491 | 0.69279839   | 3.550956172 | 0.833993675 | 0.997081362 | NA |
| ASV_16s_18330 | 0.183540615 | 0.69279962   | 3.550955811 | 0.834424382 | 0.997076564 | NA |
| ASV_16s_18331 | 0.183870863 | 0.692802073  | 3.550955091 | 0.835284831 | 0.997066964 | NA |
| ASV_16s_18332 | 0.166497801 | 0.69265991   | 3.550996832 | 0.788251347 | 0.997562011 | NA |
| ASV_16s_18333 | 0.185522102 | 0.692815649  | 3.550951529 | 0.839571666 | NA          | NA |
| ASV_16s_18334 | 0.185522102 | 0.692815649  | 3.550951529 | 0.839571666 | NA          | NA |
| ASV_16s_18335 | 0.185522102 | 0.692815649  | 3.550951529 | 0.839571666 | NA          | NA |
| ASV_16s_18336 | 0.185522102 | 0.692815649  | 3.550951529 | 0.839571666 | NA          | NA |
| ASV_16s_18337 | 0.185522102 | 0.692815649  | 3.550951529 | 0.839571666 | NA          | NA |
| ASV_16s_18338 | 0.185522102 | 0.692815649  | 3.550951529 | 0.839571666 | NA          | NA |
| ASV_16s_18339 | 0.162973006 | 0.692629138  | 3.55100638  | 0.778253977 | 0.997659597 | NA |
| ASV_16s_18340 | 0.146687548 | 0.692459391  | 3.551056365 | 0.729985312 | NA          | NA |
| ASV_16s_18341 | 0.146687548 | 0.692459391  | 3.551056365 | 0.729985312 | NA          | NA |
| ASV_16s_18342 | 0.146687548 | 0.692459391  | 3.551056365 | 0.729985312 | NA          | NA |
| ASV_16s_18343 | 0.146687548 | 0.692459391  | 3.551056365 | 0.729985312 | NA          | NA |
| ASV_16s_18344 | 0.146687548 | 0.692459391  | 3.551056365 | 0.729985312 | NA          | NA |
| ASV_16s_18345 | 0.164443474 | 0.69264276   | 3.551002371 | 0.779429578 | 0.997648257 | NA |
| ASV_16s_18346 | 0.168756671 | 0.692679934  | 3.550990951 | 0.791358885 | 0.997531142 | NA |
| ASV_16s_18347 | 0.179791232 | 0.692771013  | 3.550964207 | 0.821446421 | 0.997218876 | NA |
| ASV_16s_18348 | 0.181998144 | 0.692787921  | 3.550959244 | 0.827379457 | 0.997154393 | NA |
| ASV_16s_18349 | 0.215491761 | 0.693003721  | 3.550896311 | 0.912453425 | NA          | NA |
| ASV_16s_18350 | 0.215101828 | 0.693001607  | 3.550896931 | 0.91156184  | NA          | NA |
| ASV_16s_18351 | 0.215303172 | 1.384382025  | 3.550963587 | 0.513328705 | 0.999396199 | NA |
| ASV_16s_18352 | 0.122388647 | 0.295899691  | 3.551857264 | 0.507478219 | NA          | NA |
| ASV_16s_18353 | 0.122388647 | 0.295899691  | 3.551857264 | 0.507478219 | NA          | NA |
| ASV_16s_18354 | 0.122388647 | 0.295899691  | 3.551857264 | 0.507478219 | NA          | NA |
| ASV_16s_18355 | 0.122388647 | 0.295899691  | 3.551857264 | 0.507478219 | NA          | NA |
| ASV_16s_18356 | 0.122388647 | 0.295899691  | 3.551857264 | 0.507478219 | NA          | NA |
| ASV_16s_18357 | 0.122388647 | 0.295899691  | 3.551857264 | 0.507478219 | NA          | NA |
| ASV_16s_18358 | 0.122388647 | 0.295899691  | 3.551857264 | 0.507478219 | NA          | NA |
| ASV_16s_18359 | 0.122388647 | 0.295899691  | 3.551857264 | 0.507478219 | NA          | NA |
| ASV_16s_18360 | 0.122388647 | 0.295899691  | 3.551857264 | 0.507478219 | NA          | NA |
| ASV_16s_18361 | 0.130141404 | 0.062122248  | 3.551566433 | 0.700768907 | 0.998329822 | NA |
| ASV_16s_18362 | 0.12394216  | 0.074189387  | 3.551623154 | 0.689743334 | 0.998413309 | NA |
| ASV_16s_18363 | 0.134793058 | -0.040580409 | 3.551396096 | 0.78847493  | 0.997559799 | NA |
| ASV_16s_18364 | 0.124459998 | 0.014957467  | 3.551542928 | 0.733594721 | 0.998064085 | NA |
| ASV_16s_18365 | 0.124459998 | 0.014957467  | 3.551542928 | 0.733594721 | 0.998064085 | NA |
| ASV_16s_18366 | 0.12243428  | 0.026815818  | 3.551572827 | 0.723383417 | 0.998149547 | NA |
| ASV_16s_18367 | 0.124718917 | -0.012225184 | 3.551507767 | 0.751206695 | 0.997910611 | NA |
| ASV_16s_18368 | 0.124977836 | -0.038777976 | 3.551471536 | 0.763667685 | 0.9977973   | NA |
| ASV_16s_18369 | 0.124977836 | -0.038777976 | 3.551471536 | 0.763667685 | 0.9977973   | NA |
| ASV_16s_18370 | 0.125495673 | -0.089034989 | 3.551410397 | 0.782184249 | 0.997621546 | NA |
| ASV_16s_18371 | 0.12372317  | -0.080693731 | 3.551433085 | 0.774260944 | 0.997697842 | NA |
| ASV_16s_18372 | 0.130181332 | -0.110623417 | 3.551348205 | 0.803527341 | 0.997407789 | NA |
| ASV_16s_18373 | 0.124235304 | -0.106254587 | 3.551403058 | 0.781600109 | 0.997627227 | NA |
| ASV_16s_18374 | 0.125754592 | -0.113231379 | 3.551382338 | 0.788151727 | 0.997562997 | NA |
| ASV_16s_18375 | 0.125754592 | -0.113231379 | 3.551382338 | 0.788151727 | 0.997562997 | NA |
| ASV_16s_18376 | 0.123728874 | -0.103969821 | 3.551409279 | 0.779432949 | 0.997648225 | NA |
| ASV_16s_18377 | 0.125754592 | -0.113231379 | 3.551382338 | 0.788151727 | 0.997562997 | NA |
| ASV_16s_18378 | 0.1224628   | -0.098187068 | 3.551425119 | 0.774052935 | 0.997699823 | NA |



|               |             |              |             |             |             |    |
|---------------|-------------|--------------|-------------|-------------|-------------|----|
| ASV_16s_18379 | 0.126013511 | -0.136943669 | 3.551355816 | 0.79219379  | 0.997522804 | NA |
| ASV_16s_18380 | 0.126013511 | -0.136943669 | 3.551355816 | 0.79219379  | 0.997522804 | NA |
| ASV_16s_18381 | 0.12627243  | -0.160154283 | 3.551332399 | 0.793800033 | 0.997506712 | NA |
| ASV_16s_18382 | 0.12627243  | -0.160154283 | 3.551332399 | 0.793800033 | 0.997506712 | NA |
| ASV_16s_18383 | 0.12627243  | -0.160154283 | 3.551332399 | 0.793800033 | 0.997506712 | NA |
| ASV_16s_18384 | 0.12627243  | -0.160154283 | 3.551332399 | 0.793800033 | 0.997506712 | NA |
| ASV_16s_18385 | 0.131697879 | -0.202558245 | 3.551254497 | 0.813163322 | 0.997307285 | NA |
| ASV_16s_18386 | 0.126531349 | -0.182924612 | 3.551311748 | 0.79320507  | 0.997512681 | NA |
| ASV_16s_18387 | 0.122485616 | -0.188819815 | 3.551343411 | 0.775178572 | 0.997689089 | NA |
| ASV_16s_18388 | 0.126790268 | -0.205349364 | 3.551293679 | 0.790615356 | 0.997538551 | NA |
| ASV_16s_18389 | 0.122485616 | -0.188819815 | 3.551343411 | 0.775178572 | 0.997689089 | NA |
| ASV_16s_18390 | 0.127049186 | -0.227518952 | 3.551278057 | 0.786328444 | 0.997580985 | NA |
| ASV_16s_18391 | 0.12249132  | -0.210784971 | 3.551328734 | 0.770816119 | 0.997730503 | NA |
| ASV_16s_18392 | 0.124775957 | -0.240849599 | 3.551290718 | 0.771881404 | 0.997720435 | NA |
| ASV_16s_18393 | 0.127825943 | -0.294278557 | 3.55123843  | 0.761378472 | 0.997818414 | NA |
| ASV_16s_18394 | 0.122519841 | -0.320766011 | 3.55127652  | 0.713238905 | 0.998231934 | NA |
| ASV_16s_18395 | 0.043752468 | -0.151630303 | 3.551837453 | 0.258008389 | 0.99994002  | NA |
| ASV_16s_18396 | 0.167615607 | -0.582064272 | 3.550949946 | 0.626261509 | 0.998840406 | NA |
| ASV_16s_18397 | 0.166976694 | -0.580924535 | 3.550953524 | 0.627793263 | NA          | NA |
| ASV_16s_18398 | 0.158631074 | -0.565048804 | 3.551003447 | 0.610356527 | 0.998933759 | NA |
| ASV_16s_18399 | 0.158167428 | -0.564135145 | 3.551006323 | 0.609365167 | 0.998939404 | NA |
| ASV_16s_18400 | 0.161996163 | -0.571603653 | 3.550982964 | 0.617478066 | 0.998892609 | NA |
| ASV_16s_18401 | 0.160720615 | -0.569133342 | 3.550990651 | 0.614790474 | 0.998908262 | NA |
| ASV_16s_18402 | 0.160082841 | -0.567891339 | 3.550994531 | 0.613441327 | 0.998916063 | NA |
| ASV_16s_18403 | 0.160082841 | -0.567891339 | 3.550994531 | 0.613441327 | 0.998916063 | NA |
| ASV_16s_18404 | 0.153067327 | -0.553917269 | 3.551038853 | 0.598347153 | NA          | NA |
| ASV_16s_18405 | 0.153067327 | -0.553917269 | 3.551038853 | 0.598347153 | NA          | NA |
| ASV_16s_18406 | 0.153067327 | -0.553917269 | 3.551038853 | 0.598347153 | NA          | NA |
| ASV_16s_18407 | 0.136614375 | -0.517062093 | 3.551148568 | 0.559415405 | 0.999198538 | NA |
| ASV_16s_18408 | 0.130156212 | -0.500606048 | 3.551190843 | 0.544756914 | NA          | NA |
| ASV_16s_18409 | 0.130156212 | -0.500606048 | 3.551190843 | 0.544756914 | NA          | NA |
| ASV_16s_18410 | 0.130156212 | -0.500606048 | 3.551190843 | 0.544756914 | NA          | NA |
| ASV_16s_18411 | 0.130156212 | -0.500606048 | 3.551190843 | 0.544756914 | NA          | NA |
| ASV_16s_18412 | 0.130156212 | -0.500606048 | 3.551190843 | 0.544756914 | NA          | NA |
| ASV_16s_18413 | 0.130156212 | -0.500606048 | 3.551190843 | 0.544756914 | NA          | NA |
| ASV_16s_18414 | 0.126104776 | -0.489811503 | 3.551218957 | 0.534501061 | 0.99931009  | NA |
| ASV_16s_18415 | 0.126104776 | -0.489811503 | 3.551218957 | 0.534501061 | 0.99931009  | NA |
| ASV_16s_18416 | 0.125598346 | -0.488431091 | 3.55122255  | 0.533199709 | 0.999315609 | NA |
| ASV_16s_18417 | 0.136284251 | -0.516208841 | 3.551150728 | 0.556811368 | 0.999210731 | NA |
| ASV_16s_18418 | 0.125345132 | -0.487738986 | 3.551224355 | 0.532547561 | 0.999318363 | NA |
| ASV_16s_18419 | 0.123572628 | -0.482857344 | 3.55123715  | 0.527957638 | NA          | NA |
| ASV_16s_18420 | 0.122559769 | -0.480040825 | 3.551244585 | 0.525319329 | NA          | NA |
| ASV_16s_18421 | 0.122559769 | -0.480040825 | 3.551244585 | 0.525319329 | NA          | NA |
| ASV_16s_18422 | 0.122559769 | -0.480040825 | 3.551244585 | 0.525319329 | NA          | NA |
| ASV_16s_18423 | 0.122559769 | -0.480040825 | 3.551244585 | 0.525319329 | NA          | NA |
| ASV_16s_18424 | 0.122559769 | -0.480040825 | 3.551244585 | 0.525319329 | NA          | NA |
| ASV_16s_18425 | 0.122559769 | -0.480040825 | 3.551244585 | 0.525319329 | NA          | NA |
| ASV_16s_18426 | 0.122559769 | -0.480040825 | 3.551244585 | 0.525319329 | NA          | NA |
| ASV_16s_18427 | 0.122559769 | -0.480040825 | 3.551244585 | 0.525319329 | NA          | NA |
| ASV_16s_18428 | 0.122559769 | -0.480040825 | 3.551244585 | 0.525319329 | NA          | NA |
| ASV_16s_18429 | 0.122559769 | -0.480040825 | 3.551244585 | 0.525319329 | NA          | NA |
| ASV_16s_18430 | 0.122559769 | -0.480040825 | 3.551244585 | 0.525319329 | NA          | NA |
| ASV_16s_18431 | 0.143931577 | -0.53471116  | 3.551101829 | 0.573136637 | 0.999132188 | NA |
| ASV_16s_18432 | 0.079331858 | 0.220208677  | 3.550941098 | 0.367990423 | NA          | NA |
| ASV_16s_18433 | 0.04117309  | 0.226583918  | 3.551217195 | 0.163273418 | NA          | NA |
| ASV_16s_18434 | 0.054434716 | 0.220358278  | 3.551106174 | 0.240998219 | NA          | NA |
| ASV_16s_18435 | 0.054434716 | 0.220358278  | 3.551106174 | 0.240998219 | NA          | NA |
| ASV_16s_18436 | 0.054434716 | 0.220358278  | 3.551106174 | 0.240998219 | NA          | NA |
| ASV_16s_18439 | 0.124059874 | -0.306511189 | 3.551343475 | 0.496205184 | NA          | NA |
| ASV_16s_18440 | 0.130796747 | 0.240821328  | 3.5516287   | 0.680387523 | 0.998481933 | NA |
| ASV_16s_18441 | 0.141043544 | 0.184541626  | 3.55152276  | 0.652278662 | 0.998676142 | NA |
| ASV_16s_18442 | 0.163623913 | -0.560039219 | 3.550963412 | 0.663845906 | 0.998598368 | NA |
| ASV_16s_18443 | 0.149673215 | -0.655987064 | 3.551134707 | 0.481912589 | 0.999510052 | NA |
| ASV_16s_18444 | 0.126940298 | 0.646187792  | 3.551836056 | 0.557641762 | 0.999206856 | NA |
| ASV_16s_18445 | 0.109952181 | 0.03186661   | 3.551805114 | 0.454686989 | 0.999596068 | NA |
| ASV_16s_18446 | 0.158414723 | -0.514879939 | 3.55095182  | 0.689975938 | 0.998411577 | NA |
| ASV_16s_18447 | 0.169832292 | -0.538134662 | 3.550829966 | 0.738750103 | 0.998019961 | NA |

|               |             |              |             |             |             |    |
|---------------|-------------|--------------|-------------|-------------|-------------|----|
| ASV_16s_18448 | 0.151218199 | -0.495107051 | 3.551024819 | 0.672465607 | 0.998538469 | NA |
| ASV_16s_18449 | 0.1308677   | 0.666597699  | 3.55167241  | 0.62729074  | 0.998834182 | NA |
| ASV_16s_18450 | 0.1308677   | 0.666597699  | 3.55167241  | 0.62729074  | 0.998834182 | NA |
| ASV_16s_18451 | 0.126902981 | 0.315918097  | 3.552007331 | 0.328756292 | 0.999863708 | NA |
| ASV_16s_18452 | 0.16422825  | -0.484004913 | 3.550858408 | 0.748442226 | 0.997935215 | NA |
| ASV_16s_18453 | 0.168209172 | -0.477521204 | 3.550817799 | 0.77318097  | 0.997708114 | NA |
| ASV_16s_18454 | 0.135662636 | -0.030412243 | 3.551514224 | 0.461822682 | 0.999574613 | NA |
| ASV_16s_18455 | 0.170585257 | 0.626236428  | 3.550857925 | 0.729868714 | 0.998095566 | NA |
| ASV_16s_18456 | 0.161608715 | -0.43050727  | 3.550861987 | 0.759514233 | 0.997835508 | NA |
| ASV_16s_18457 | 0.14870636  | -0.367598299 | 3.550970547 | 0.720018486 | 0.998177151 | NA |
| ASV_16s_18458 | 0.160894199 | 0.093050004  | 3.551138304 | 0.794731085 | 0.997497353 | NA |
| ASV_16s_18459 | 0.139418392 | 0.756588031  | 3.551312173 | 0.486107933 | 0.999495775 | NA |
| ASV_16s_18460 | 0.166438148 | -0.062919284 | 3.550930978 | 0.682106363 | 0.998469477 | NA |
| ASV_16s_18461 | 0.160982754 | -0.372027013 | 3.550874337 | 0.770458718 | 0.997733874 | NA |
| ASV_16s_18462 | 0.136842584 | -0.283181488 | 3.551103909 | 0.71240092  | 0.998238629 | NA |
| ASV_16s_18463 | 0.183963513 | -0.521333255 | 3.550698339 | 0.387414448 | 0.999763302 | NA |
| ASV_16s_18464 | 0.153508694 | -0.31488281  | 3.550929232 | 0.748085124 | 0.99793838  | NA |
| ASV_16s_18465 | 0.157185416 | 0.679635717  | 3.551192409 | 0.73530617  | 0.99804951  | NA |
| ASV_16s_18466 | 0.15567783  | 0.164892468  | 3.550970521 | 0.738050845 | 0.998025984 | NA |
| ASV_16s_18467 | 0.15834926  | 0.183512437  | 3.549991849 | 0.710090711 | 0.998256997 | NA |
| ASV_16s_18468 | 0.15834926  | 0.183512437  | 3.549991849 | 0.710090711 | 0.998256997 | NA |
| ASV_16s_18469 | 0.164297819 | 0.681690546  | 3.551117189 | 0.754074435 | NA          | NA |
| ASV_16s_18470 | 0.149566674 | -0.110711095 | 3.551003536 | 0.740284981 | 0.998006697 | NA |
| ASV_16s_18471 | 0.142915511 | -0.105778276 | 3.551052994 | 0.743449623 | 0.997979163 | NA |
| ASV_16s_18472 | 0.136866561 | -0.163231971 | 3.551032375 | 0.360502045 | 0.999814106 | NA |
| ASV_16s_18473 | 0.143594703 | -0.060822221 | 3.551381453 | 0.630476151 | 0.99881478  | NA |
| ASV_16s_18474 | 0.14161263  | -0.069418955 | 3.551231151 | 0.651894075 | 0.998678677 | NA |
| ASV_16s_18475 | 0.166689026 | 0.375118275  | 3.550967303 | 0.768683058 | 0.997750573 | NA |
| ASV_16s_18476 | 0.216751176 | 1.216422316  | 3.550877095 | 0.5794841   | NA          | NA |
| ASV_16s_18477 | 0.160778273 | 1.070041906  | 3.551278917 | 0.557218811 | NA          | NA |
| ASV_16s_18478 | 0.160778273 | 1.070041906  | 3.551278917 | 0.557218811 | NA          | NA |
| ASV_16s_18479 | 0.160778273 | 1.070041906  | 3.551278917 | 0.557218811 | NA          | NA |
| ASV_16s_18480 | 0.118811365 | 0.217171388  | 3.55113807  | 0.243125589 | 0.999951    | NA |
| ASV_16s_18481 | 0.131361571 | 0.746461627  | 3.551651023 | 0.434360612 | NA          | NA |
| ASV_16s_18482 | 0.152676967 | 1.126807093  | 3.551246371 | 0.544763661 | NA          | NA |
| ASV_16s_18483 | 0.149318022 | 1.118893228  | 3.551263897 | 0.537286979 | 0.999298174 | NA |
| ASV_16s_18484 | 0.158077838 | 0.656494716  | 3.551336293 | 0.83782328  | 0.997038521 | NA |
| ASV_16s_18485 | 0.170039932 | 1.409880632  | 3.551085008 | 0.38932779  | 0.999759363 | NA |
| ASV_16s_18486 | 0.140080923 | 1.096272842  | 3.55131546  | 0.516127392 | NA          | NA |
| ASV_16s_18487 | 0.140080923 | 1.096272842  | 3.55131546  | 0.516127392 | NA          | NA |
| ASV_16s_18488 | 0.140080923 | 1.096272842  | 3.55131546  | 0.516127392 | NA          | NA |
| ASV_16s_18489 | 0.140080923 | 1.096272842  | 3.55131546  | 0.516127392 | NA          | NA |
| ASV_16s_18490 | 0.178033142 | 1.50737745   | 3.55083018  | 0.338244074 | 0.999849988 | NA |
| ASV_16s_18491 | 0.137243266 | 1.301608682  | 3.551281326 | 0.284177338 | 0.999916736 | NA |
| ASV_16s_18492 | 0.132806341 | 0.344237018  | 3.551874884 | 0.534410963 | NA          | NA |
| ASV_16s_18493 | 0.160778273 | 0.354279298  | 3.551747438 | 0.597103264 | NA          | NA |
| ASV_16s_18494 | 0.156949066 | -0.00578728  | 3.551089618 | 0.895409162 | 0.996344041 | NA |
| ASV_16s_18495 | 0.177827664 | 0.362853251  | 3.551652641 | 0.63077046  | NA          | NA |
| ASV_16s_18496 | 0.169165887 | 0.341949619  | 3.551982412 | 0.409941038 | 0.999714024 | NA |
| ASV_16s_18497 | 0.173320254 | 0.34623538   | 3.551919976 | 0.47262819  | 0.999540662 | NA |
| ASV_16s_18498 | 0.141682008 | 0.395849816  | 3.551199266 | 0.579275048 | 0.999101342 | NA |
| ASV_16s_18499 | 0.102916982 | 0.334193147  | 3.551961531 | 0.455747326 | NA          | NA |
| ASV_16s_18500 | 0.102916982 | 0.334193147  | 3.551961531 | 0.455747326 | NA          | NA |
| ASV_16s_18501 | 0.102916982 | 0.334193147  | 3.551961531 | 0.455747326 | NA          | NA |
| ASV_16s_18502 | 0.150801932 | -0.471744344 | 3.55117949  | 0.492955579 | NA          | NA |
| ASV_16s_18503 | 0.139351889 | 0.346648609  | 3.551852881 | 0.550060947 | NA          | NA |
| ASV_16s_18504 | 0.135080803 | -0.001567877 | 3.551833482 | 0.56113704  | NA          | NA |
| ASV_16s_18505 | 0.187056751 | 0.367515192  | 3.551596283 | 0.647701088 | NA          | NA |
| ASV_16s_18506 | 0.198013555 | 0.34792754   | 3.551991291 | 0.387979955 | 0.999762143 | NA |
| ASV_16s_18507 | 0.172200546 | -0.525569731 | 3.550896905 | 0.623013073 | NA          | NA |
| ASV_16s_18508 | 0.23812915  | -0.714693309 | 3.550308876 | 0.508511635 | NA          | NA |
| ASV_16s_18509 | 0.102784344 | -0.394194245 | 3.551518013 | 0.462428676 | NA          | NA |
| ASV_16s_18510 | 0.102784344 | -0.394194245 | 3.551518013 | 0.462428676 | NA          | NA |
| ASV_16s_18511 | 0.148430387 | -0.820604421 | 3.551110471 | 0.341553988 | 0.999844985 | NA |
| ASV_16s_18512 | 0.090337278 | -0.546297054 | 3.551432526 | 0.231013364 | 0.999958832 | NA |
| ASV_16s_18513 | 0.079533322 | 0.950252252  | 3.55150138  | 0.296776088 | NA          | NA |
| ASV_16s_18514 | 0.079533322 | 0.950252252  | 3.55150138  | 0.296776088 | NA          | NA |

|               |             |              |             |             |             |    |
|---------------|-------------|--------------|-------------|-------------|-------------|----|
| ASV_16s_18515 | 0.079533322 | 0.950252252  | 3.55150138  | 0.296776088 | NA          | NA |
| ASV_16s_18516 | 0.218601785 | 1.259637818  | 3.550715526 | 0.607861598 | NA          | NA |
| ASV_16s_18517 | 0.136348131 | 1.124644326  | 3.551090888 | 0.448980454 | NA          | NA |
| ASV_16s_18518 | 0.156345925 | 0.372772352  | 3.551411092 | 0.523139151 | NA          | NA |
| ASV_16s_18519 | 0.156345925 | 0.372772352  | 3.551411092 | 0.523139151 | NA          | NA |
| ASV_16s_18520 | 0.141955692 | 0.366029249  | 3.551497718 | 0.4922463   | NA          | NA |
| ASV_16s_18521 | 0.141955692 | 0.366029249  | 3.551497718 | 0.4922463   | NA          | NA |
| ASV_16s_18522 | 0.117182748 | 0.354776371  | 3.551616974 | 0.432835626 | NA          | NA |
| ASV_16s_18523 | 0.200739405 | 0.393315368  | 3.551134089 | 0.604808964 | NA          | NA |
| ASV_16s_18524 | 0.126787579 | 0.359522891  | 3.551575527 | 0.456880997 | NA          | NA |
| ASV_16s_18525 | 0.126787579 | 0.359522891  | 3.551575527 | 0.456880997 | NA          | NA |
| ASV_16s_18526 | 0.044146354 | 0.340731822  | 3.551895835 | 0.199193597 | 0.999975189 | NA |
| ASV_16s_18527 | 0.177865584 | 0.381804164  | 3.551289724 | 0.565408602 | NA          | NA |
| ASV_16s_18528 | 0.177865584 | 0.381804164  | 3.551289724 | 0.565408602 | NA          | NA |
| ASV_16s_18529 | 0.071234549 | -0.311850349 | 3.55146697  | 0.301361615 | NA          | NA |
| ASV_16s_18530 | 0.071234549 | -0.311850349 | 3.55146697  | 0.301361615 | NA          | NA |
| ASV_16s_18531 | 0.174744408 | -0.53042041  | 3.550545943 | 0.559605829 | NA          | NA |
| ASV_16s_18532 | 0.174744408 | -0.53042041  | 3.550545943 | 0.559605829 | NA          | NA |
| ASV_16s_18533 | 0.183682624 | -0.534354108 | 3.55046528  | 0.571489973 | 0.99914034  | NA |
| ASV_16s_18534 | 0.231691184 | -0.545888409 | 3.550118076 | 0.647887374 | NA          | NA |
| ASV_16s_18535 | 0.13666788  | -0.488432051 | 3.550904306 | 0.48263457  | NA          | NA |
| ASV_16s_18536 | 0.079287052 | -0.343006937 | 3.551406515 | 0.328139009 | NA          | NA |
| ASV_16s_18537 | 0.079287052 | -0.343006937 | 3.551406515 | 0.328139009 | NA          | NA |
| ASV_16s_18538 | 0.156375494 | 1.168412856  | 3.550990309 | 0.49381297  | NA          | NA |
| ASV_16s_18539 | 0.107652851 | 0.645404382  | 3.550846739 | 0.355647429 | NA          | NA |
| ASV_16s_18540 | 0.062853775 | 0.880972449  | 3.551649972 | 0.24351016  | NA          | NA |
| ASV_16s_18541 | 0.062853775 | 0.880972449  | 3.551649972 | 0.24351016  | NA          | NA |
| ASV_16s_18542 | 0.141955692 | -0.078338542 | 3.550899316 | 0.771731985 | NA          | NA |
| ASV_16s_18543 | 0.141955692 | -0.078338542 | 3.550899316 | 0.771731985 | NA          | NA |
| ASV_16s_18544 | 0.141955692 | -0.078338542 | 3.550899316 | 0.771731985 | NA          | NA |
| ASV_16s_18545 | 0.141955692 | -0.078338542 | 3.550899316 | 0.771731985 | NA          | NA |
| ASV_16s_18546 | 0.141955692 | -0.078338542 | 3.550899316 | 0.771731985 | NA          | NA |
| ASV_16s_18547 | 0.141955692 | -0.078338542 | 3.550899316 | 0.771731985 | NA          | NA |
| ASV_16s_18548 | 0.121047233 | -0.078118076 | 3.550965351 | 0.699541455 | NA          | NA |
| ASV_16s_18549 | 0.121047233 | -0.078118076 | 3.550965351 | 0.699541455 | NA          | NA |
| ASV_16s_18550 | 0.121047233 | -0.078118076 | 3.550965351 | 0.699541455 | NA          | NA |
| ASV_16s_18551 | 0.133954787 | 0.096619955  | 3.55093138  | 1.075720723 | 0.993512859 | NA |
| ASV_16s_18552 | 0.136573489 | -0.078287828 | 3.550914395 | 0.753949196 | NA          | NA |
| ASV_16s_18553 | 0.079331858 | 0.220208677  | 3.550941098 | 0.367990423 | NA          | NA |
| ASV_16s_18554 | 0.084280237 | 0.220192538  | 3.550919814 | 0.390677748 | 0.999756557 | NA |
| ASV_16s_18555 | 0.09011548  | 0.220175789  | 3.550897695 | 0.416507833 | NA          | NA |
| ASV_16s_18556 | 0.09011548  | 0.220175789  | 3.550897695 | 0.416507833 | NA          | NA |
| ASV_16s_18557 | 0.09011548  | 0.220175789  | 3.550897695 | 0.416507833 | NA          | NA |
| ASV_16s_18558 | 0.090019504 | 0.220176033  | 3.550898036 | 0.416090855 | 0.999699438 | NA |
| ASV_16s_18559 | 0.089935526 | 0.220176274  | 3.550898334 | 0.41572595  | NA          | NA |
| ASV_16s_18560 | 0.153802939 | 0.310948537  | 3.551013092 | 0.789402343 | NA          | NA |
| ASV_16s_18561 | 0.134109183 | 0.310952618  | 3.551075077 | 0.725845006 | NA          | NA |
| ASV_16s_18562 | 0.153316117 | 0.310948624  | 3.551014433 | 0.78790541  | NA          | NA |
| ASV_16s_18563 | 0.094929546 | 0.595718633  | 3.550839136 | 0.381025521 | NA          | NA |
| ASV_16s_18564 | 0.144309975 | -0.545010639 | 3.551304229 | 0.490411774 | NA          | NA |
| ASV_16s_18565 | 0.181036744 | 1.247091021  | 3.551095677 | 0.546790354 | NA          | NA |
| ASV_16s_18566 | 0.116460244 | 0.237717396  | 3.551002071 | 0.358697872 | NA          | NA |
| ASV_16s_18567 | 0.174001754 | 0.448564195  | 3.551453774 | 0.520751835 | 0.999366893 | NA |
| ASV_16s_18568 | 0.190279833 | 1.262973553  | 3.55146195  | 0.431376273 | 0.99966099  | NA |
| ASV_16s_18569 | 0.154178157 | 0.245329325  | 3.550782168 | 0.872641443 | NA          | NA |
| ASV_16s_18570 | 0.126002416 | -0.066938874 | 3.551039094 | 0.801030256 | 0.997433425 | NA |
| ASV_16s_18571 | 0.146349496 | -0.174024403 | 3.551041432 | 0.726284818 | 0.998125524 | NA |
| ASV_16s_18572 | 0.153114256 | -0.640635032 | 3.551266089 | 0.491075767 | 0.999478507 | NA |
| ASV_16s_18573 | 0.128975526 | -0.060460661 | 3.551141547 | 0.825310079 | 0.997176994 | NA |
| ASV_16s_18574 | 0.136221112 | -0.066528415 | 3.5510585   | 0.856060005 | 0.996828867 | NA |
| ASV_16s_18575 | 0.136221112 | -0.066528415 | 3.5510585   | 0.856060005 | 0.996828867 | NA |
| ASV_16s_18576 | 0.1478326   | 0.514690649  | 3.551568859 | 0.571526055 | 0.999140161 | NA |
| ASV_16s_18577 | 0.206384834 | 1.032699646  | 3.551469381 | 0.740369147 | 0.998005968 | NA |
| ASV_16s_18578 | 0.175279831 | 0.618524907  | 3.550796976 | 0.578158387 | 0.999107007 | NA |
| ASV_16s_18579 | 0.130370308 | 0.021768178  | 3.551236123 | 0.882563383 | 0.996507264 | NA |
| ASV_16s_18580 | 0.137322795 | -0.012639437 | 3.55128476  | 0.812057296 | NA          | NA |
| ASV_16s_18581 | 0.209125863 | -0.015264004 | 3.551547478 | 0.693139904 | NA          | NA |

|               |             |              |             |             |             |    |
|---------------|-------------|--------------|-------------|-------------|-------------|----|
| ASV_16s_18582 | 0.161659033 | 0.02246907   | 3.550910118 | 0.84878833  | 0.996913588 | NA |
| ASV_16s_18583 | 0.099547193 | 0.50159685   | 3.551560245 | 0.523405826 | NA          | NA |
| ASV_16s_18584 | 0.224269813 | 1.159337313  | 3.550883491 | 0.671451354 | NA          | NA |
| ASV_16s_18585 | 0.15517983  | 0.971474438  | 3.551366128 | 0.527320787 | NA          | NA |
| ASV_16s_18586 | 0.106741632 | 0.283897738  | 3.551728261 | 0.472244291 | NA          | NA |
| ASV_16s_18587 | 0.170926549 | 0.279224247  | 3.551610225 | 0.631224289 | NA          | NA |
| ASV_16s_18588 | 0.170926549 | 0.279224247  | 3.551610225 | 0.631224289 | NA          | NA |
| ASV_16s_18589 | 0.120298667 | 0.905381233  | 3.551522867 | 0.447619126 | NA          | NA |
| ASV_16s_18590 | 0.276487061 | -0.563492757 | 3.550147073 | 0.784884019 | NA          | NA |
| ASV_16s_18591 | 0.20514442  | -0.861550286 | 3.550677399 | 0.548342241 | 0.999249515 | NA |
| ASV_16s_18592 | 0.160778273 | -0.519687011 | 3.550672398 | 0.533354363 | NA          | NA |
| ASV_16s_18593 | 0.160778273 | -0.519687011 | 3.550672398 | 0.533354363 | NA          | NA |
| ASV_16s_18594 | 0.160778273 | -0.519687011 | 3.550672398 | 0.533354363 | NA          | NA |
| ASV_16s_18595 | 0.178272716 | 1.20621666   | 3.550883354 | 0.537789426 | NA          | NA |
| ASV_16s_18596 | 0.178272716 | 1.20621666   | 3.550883354 | 0.537789426 | NA          | NA |
| ASV_16s_18597 | 0.178272716 | 1.20621666   | 3.550883354 | 0.537789426 | NA          | NA |
| ASV_16s_18598 | 0.167272981 | 1.116199621  | 3.551006894 | 0.721647576 | 0.998163821 | NA |
| ASV_16s_18599 | 0.101585604 | -0.077830781 | 3.551051032 | 0.624118007 | NA          | NA |
| ASV_16s_18600 | 0.131481477 | -0.067215067 | 3.551058894 | 0.797629524 | NA          | NA |
| ASV_16s_18601 | 0.26051674  | 0.411694246  | 3.55015271  | 1.406733336 | 0.985364136 | NA |
| ASV_16s_18602 | 0.247858258 | 0.639017925  | 3.550332718 | 1.279203317 | 0.988987495 | NA |
| ASV_16s_18603 | 0.224235191 | -0.028896513 | 3.550881772 | 1.050923538 | NA          | NA |
| ASV_16s_18604 | 0.242820901 | 0.613043126  | 3.550671913 | 1.368714794 | 0.986510287 | NA |
| ASV_16s_18605 | 0.189966975 | 0.379058303  | 3.550698899 | 0.987871968 | NA          | NA |
| ASV_16s_18606 | 0.160237422 | -0.302634181 | 3.551036936 | 0.714753928 | NA          | NA |
| ASV_16s_18607 | 0.196639507 | 0.475949191  | 3.551002764 | 1.308166567 | 0.988219558 | NA |
| ASV_16s_18608 | 0.134027965 | -0.028170359 | 3.551123538 | 0.804379707 | NA          | NA |
| ASV_16s_18609 | 0.134027965 | -0.028170359 | 3.551123538 | 0.804379707 | NA          | NA |
| ASV_16s_18610 | 0.134027965 | -0.028170359 | 3.551123538 | 0.804379707 | NA          | NA |
| ASV_16s_18611 | 0.134027965 | -0.028170359 | 3.551123538 | 0.804379707 | NA          | NA |
| ASV_16s_18612 | 0.16986928  | 0.479598997  | 3.551073628 | 1.189169589 | 0.991174131 | NA |
| ASV_16s_18613 | 0.153144007 | -0.0733075   | 3.550906772 | 0.831250983 | NA          | NA |
| ASV_16s_18614 | 0.111850197 | -0.072801979 | 3.551050718 | 0.689074931 | NA          | NA |
| ASV_16s_18615 | 0.111850197 | -0.072801979 | 3.551050718 | 0.689074931 | NA          | NA |
| ASV_16s_18616 | 0.111850197 | -0.072801979 | 3.551050718 | 0.689074931 | NA          | NA |
| ASV_16s_18617 | 0.109840436 | -0.072767721 | 3.551060461 | 0.681252667 | NA          | NA |
| ASV_16s_18618 | 0.109840436 | -0.072767721 | 3.551060461 | 0.681252667 | NA          | NA |
| ASV_16s_18619 | 0.109840436 | -0.072767721 | 3.551060461 | 0.681252667 | NA          | NA |
| ASV_16s_18620 | 0.14621687  | 0.334851436  | 3.550910148 | 0.886773462 | 0.996454303 | NA |
| ASV_16s_18621 | 0.186582557 | 0.327039227  | 3.550570339 | 1.05974051  | 0.993806425 | NA |
| ASV_16s_18622 | 0.154285178 | -0.073317625 | 3.550903905 | 0.831755504 | 0.99710621  | NA |
| ASV_16s_18623 | 0.187306985 | 0.424335534  | 3.551070957 | 0.936020431 | NA          | NA |
| ASV_16s_18624 | 0.136285704 | -0.073138621 | 3.550955079 | 0.777142559 | NA          | NA |
| ASV_16s_18625 | 0.136285704 | -0.073138621 | 3.550955079 | 0.777142559 | NA          | NA |
| ASV_16s_18626 | 0.16203782  | 0.334510999  | 3.550758609 | 0.946760207 | 0.995642263 | NA |
| ASV_16s_18627 | 0.152888712 | 0.360272331  | 3.551256438 | 0.848248387 | NA          | NA |
| ASV_16s_18628 | 0.152888712 | 0.360272331  | 3.551256438 | 0.848248387 | NA          | NA |
| ASV_16s_18629 | 0.148382074 | 0.339142381  | 3.551535298 | 0.610691119 | 0.998931849 | NA |
| ASV_16s_18630 | 0.181747407 | 0.344681544  | 3.551367453 | 0.6772506   | 0.998504491 | NA |
| ASV_16s_18631 | 0.135912783 | 0.360247387  | 3.551338267 | 0.79355626  | NA          | NA |
| ASV_16s_18632 | 0.135912783 | 0.360247387  | 3.551338267 | 0.79355626  | NA          | NA |
| ASV_16s_18633 | 0.135912783 | 0.360247387  | 3.551338267 | 0.79355626  | NA          | NA |
| ASV_16s_18634 | 0.135912783 | 0.360247387  | 3.551338267 | 0.79355626  | NA          | NA |
| ASV_16s_18635 | 0.135912783 | 0.360247387  | 3.551338267 | 0.79355626  | NA          | NA |
| ASV_16s_18636 | 0.135912783 | 0.360247387  | 3.551338267 | 0.79355626  | NA          | NA |
| ASV_16s_18637 | 0.135912783 | 0.360247387  | 3.551338267 | 0.79355626  | NA          | NA |
| ASV_16s_18638 | 0.176101456 | 0.315939793  | 3.550994458 | 0.877042059 | NA          | NA |
| ASV_16s_18639 | 0.184044263 | 0.315939626  | 3.550977023 | 0.896490876 | 0.996330074 | NA |
| ASV_16s_18640 | 0.16244315  | 0.315939839  | 3.551028473 | 0.837106271 | 0.997046573 | NA |
| ASV_16s_18641 | 0.151061229 | 0.315939885  | 3.55106147  | 0.802337388 | 0.997420026 | NA |
| ASV_16s_18642 | 0.15222156  | 0.315939955  | 3.551057871 | 0.807324427 | NA          | NA |
| ASV_16s_18643 | 0.147088626 | 0.315939902  | 3.551074169 | 0.79123212  | 0.997532406 | NA |
| ASV_16s_18644 | 0.146746431 | 0.315939904  | 3.551075295 | 0.790144104 | 0.99754324  | NA |
| ASV_16s_18645 | 0.156949016 | 0.610050687  | 3.551103908 | 0.812126434 | 0.997318221 | NA |
| ASV_16s_18646 | 0.141955692 | 0.31594001   | 3.551091636 | 0.774721529 | NA          | NA |
| ASV_16s_18647 | 0.141955692 | 0.31594001   | 3.551091636 | 0.774721529 | NA          | NA |
| ASV_16s_18648 | 0.141955692 | 0.31594001   | 3.551091636 | 0.774721529 | NA          | NA |

|               |             |              |             |             |             |    |
|---------------|-------------|--------------|-------------|-------------|-------------|----|
| ASV_16s_18649 | 0.141955692 | 0.31594001   | 3.551091636 | 0.774721529 | NA          | NA |
| ASV_16s_18650 | 0.141955692 | 0.31594001   | 3.551091636 | 0.774721529 | NA          | NA |
| ASV_16s_18651 | 0.141955692 | 0.31594001   | 3.551091636 | 0.774721529 | NA          | NA |
| ASV_16s_18652 | 0.141955692 | 0.31594001   | 3.551091636 | 0.774721529 | NA          | NA |
| ASV_16s_18653 | 0.141955692 | 0.31594001   | 3.551091636 | 0.774721529 | NA          | NA |
| ASV_16s_18654 | 0.141955692 | 0.31594001   | 3.551091636 | 0.774721529 | NA          | NA |
| ASV_16s_18655 | 0.141955692 | 0.31594001   | 3.551091636 | 0.774721529 | NA          | NA |
| ASV_16s_18656 | 0.15866184  | 0.315939853  | 3.551038985 | 0.822817629 | 0.997204059 | NA |
| ASV_16s_18657 | 0.171191452 | 0.315939808  | 3.551006164 | 0.859218861 | 0.996791595 | NA |
| ASV_16s_18658 | 0.191136398 | 0.596090564  | 3.550693885 | 0.685841917 | NA          | NA |
| ASV_16s_18659 | 0.135189662 | 0.687351037  | 3.551044517 | 0.668854441 | NA          | NA |
| ASV_16s_18660 | 0.216009759 | 1.100335301  | 3.550788674 | 0.683937474 | 0.998456132 | NA |
| ASV_16s_18661 | 0.300473898 | 0.734371749  | 3.550934065 | 1.13805397  | NA          | NA |
| ASV_16s_18662 | 0.181937169 | 1.090268696  | 3.551151427 | 0.651689964 | 0.998680021 | NA |
| ASV_16s_18663 | 0.187789937 | 0.733637985  | 3.551147297 | 0.88589452  | NA          | NA |
| ASV_16s_18664 | 0.187789937 | 0.733637985  | 3.551147297 | 0.88589452  | NA          | NA |
| ASV_16s_18665 | 0.187789937 | 0.733637985  | 3.551147297 | 0.88589452  | NA          | NA |
| ASV_16s_18666 | 0.187789937 | 0.733637985  | 3.551147297 | 0.88589452  | NA          | NA |
| ASV_16s_18667 | 0.187789937 | 0.733637985  | 3.551147297 | 0.88589452  | NA          | NA |
| ASV_16s_18668 | 0.187789937 | 0.733637985  | 3.551147297 | 0.88589452  | NA          | NA |
| ASV_16s_18669 | 0.174341191 | 1.041251641  | 3.551063954 | 0.630071185 | NA          | NA |
| ASV_16s_18670 | 0.093022809 | 0.701351127  | 3.551578382 | 0.578807747 | NA          | NA |
| ASV_16s_18671 | 0.093022809 | 0.701351127  | 3.551578382 | 0.578807747 | NA          | NA |
| ASV_16s_18672 | 0.1745838   | 0.692731196  | 3.550976408 | 0.810494653 | NA          | NA |
| ASV_16s_18673 | 0.1745838   | 0.692731196  | 3.550976408 | 0.810494653 | NA          | NA |
| ASV_16s_18674 | 0.1745838   | 0.692731196  | 3.550976408 | 0.810494653 | NA          | NA |
| ASV_16s_18675 | 0.156094539 | 0.692560229  | 3.551026272 | 0.758206204 | 0.99784745  | NA |
| ASV_16s_18676 | 0.177721155 | 0.692755194  | 3.550968971 | 0.818949052 | 0.997245729 | NA |
| ASV_16s_18677 | 0.153919332 | 0.69253763   | 3.551032918 | 0.751639697 | 0.99790674  | NA |
| ASV_16s_18678 | 0.177721155 | 0.692755194  | 3.550968971 | 0.818949052 | 0.997245729 | NA |
| ASV_16s_18679 | 0.151744124 | 0.692514393  | 3.551039752 | 0.744913204 | 0.997966345 | NA |
| ASV_16s_18680 | 0.178546775 | 0.69276171   | 3.550967057 | 0.821146586 | 0.997222109 | NA |
| ASV_16s_18681 | 0.200362854 | 0.692911029  | 3.550922167 | 0.87599758  | 0.996588827 | NA |
| ASV_16s_18682 | 0.179537518 | 0.692770732  | 3.550964784 | 0.823789769 | NA          | NA |
| ASV_16s_18683 | 0.179537518 | 0.692770732  | 3.550964784 | 0.823789769 | NA          | NA |
| ASV_16s_18684 | 0.165757515 | 0.692653533  | 3.550998842 | 0.786067866 | 0.997583549 | NA |
| ASV_16s_18685 | 0.141955692 | 0.69240288   | 3.551073069 | 0.71514795  | NA          | NA |
| ASV_16s_18686 | 0.141955692 | 0.69240288   | 3.551073069 | 0.71514795  | NA          | NA |
| ASV_16s_18687 | 0.141955692 | 0.69240288   | 3.551073069 | 0.71514795  | NA          | NA |
| ASV_16s_18688 | 0.141955692 | 0.69240288   | 3.551073069 | 0.71514795  | NA          | NA |
| ASV_16s_18689 | 0.141955692 | 0.69240288   | 3.551073069 | 0.71514795  | NA          | NA |
| ASV_16s_18690 | 0.141955692 | 0.69240288   | 3.551073069 | 0.71514795  | NA          | NA |
| ASV_16s_18691 | 0.159711618 | 0.692596368  | 3.551015645 | 0.765173744 | 0.997783336 | NA |
| ASV_16s_18692 | 0.208540414 | 0.692963775  | 3.550907742 | 0.896235261 | NA          | NA |
| ASV_16s_18693 | 0.208540414 | 0.692963775  | 3.550907742 | 0.896235261 | NA          | NA |
| ASV_16s_18694 | 0.20816306  | 0.692961591  | 3.550908383 | 0.895347475 | NA          | NA |
| ASV_16s_18695 | 0.118309026 | 0.296200825  | 3.5518698   | 0.496900464 | NA          | NA |
| ASV_16s_18696 | 0.118309026 | 0.296200825  | 3.5518698   | 0.496900464 | NA          | NA |
| ASV_16s_18697 | 0.118309026 | 0.296200825  | 3.5518698   | 0.496900464 | NA          | NA |
| ASV_16s_18698 | 0.118309026 | 0.296200825  | 3.5518698   | 0.496900464 | NA          | NA |
| ASV_16s_18699 | 0.118309026 | 0.296200825  | 3.5518698   | 0.496900464 | NA          | NA |
| ASV_16s_18700 | 0.118309026 | 0.296200825  | 3.5518698   | 0.496900464 | NA          | NA |
| ASV_16s_18701 | 0.118309026 | 0.296200825  | 3.5518698   | 0.496900464 | NA          | NA |
| ASV_16s_18702 | 0.118309026 | 0.296200825  | 3.5518698   | 0.496900464 | NA          | NA |
| ASV_16s_18703 | 0.118309026 | 0.296200825  | 3.5518698   | 0.496900464 | NA          | NA |
| ASV_16s_18704 | 0.118309026 | 0.296200825  | 3.5518698   | 0.496900464 | NA          | NA |
| ASV_16s_18705 | 0.118309026 | 0.296200825  | 3.5518698   | 0.496900464 | NA          | NA |
| ASV_16s_18706 | 0.118309026 | 0.296200825  | 3.5518698   | 0.496900464 | NA          | NA |
| ASV_16s_18707 | 0.118309026 | 0.296200825  | 3.5518698   | 0.496900464 | NA          | NA |
| ASV_16s_18708 | 0.126061782 | 0.060042862  | 3.551592899 | 0.686734779 | 0.998435597 | NA |
| ASV_16s_18709 | 0.12902345  | 0.041828701  | 3.55154638  | 0.703876258 | 0.998305776 | NA |
| ASV_16s_18710 | 0.120121458 | 0.041909897  | 3.551603735 | 0.697633805 | 0.998353852 | NA |
| ASV_16s_18711 | 0.120380376 | 0.012376058  | 3.551567625 | 0.716674768 | 0.998204309 | NA |
| ASV_16s_18712 | 0.120639295 | -0.015505081 | 3.551533915 | 0.730640028 | 0.998089077 | NA |
| ASV_16s_18713 | 0.120639295 | -0.015505081 | 3.551533915 | 0.730640028 | 0.998089077 | NA |
| ASV_16s_18714 | 0.118360362 | -0.002367496 | 3.551562552 | 0.719535569 | 0.99818109  | NA |
| ASV_16s_18715 | 0.120898214 | -0.042140964 | 3.551500551 | 0.742351023 | 0.99798875  | NA |

|               |             |              |             |             |             |    |
|---------------|-------------|--------------|-------------|-------------|-------------|----|
| ASV_16s_18716 | 0.118377474 | -0.078671462 | 3.551479564 | 0.745717982 | 0.997959273 | NA |
| ASV_16s_18717 | 0.136915641 | -0.160084589 | 3.551246035 | 0.831550915 | 0.997108475 | NA |
| ASV_16s_18718 | 0.121416052 | -0.093209267 | 3.55143886  | 0.759078704 | 0.997839489 | NA |
| ASV_16s_18719 | 0.118377474 | -0.078671462 | 3.551479564 | 0.745717982 | 0.997959273 | NA |
| ASV_16s_18720 | 0.121416052 | -0.093209267 | 3.55143886  | 0.759078704 | 0.997839489 | NA |
| ASV_16s_18721 | 0.121416052 | -0.093209267 | 3.55143886  | 0.759078704 | 0.997839489 | NA |
| ASV_16s_18722 | 0.121674971 | -0.117605312 | 3.551413161 | 0.764325137 | 0.997791212 | NA |
| ASV_16s_18723 | 0.121933889 | -0.141686715 | 3.551387735 | 0.767245089 | 0.997764036 | NA |
| ASV_16s_18724 | 0.119908171 | -0.132797049 | 3.551414476 | 0.758998398 | 0.997840223 | NA |
| ASV_16s_18725 | 0.128963324 | -0.170879242 | 3.551300958 | 0.796641089 | 0.997478081 | NA |
| ASV_16s_18726 | 0.119908171 | -0.132797049 | 3.551414476 | 0.758998398 | 0.997840223 | NA |
| ASV_16s_18727 | 0.121933889 | -0.141686715 | 3.551387735 | 0.767245089 | 0.997764036 | NA |
| ASV_16s_18728 | 0.137005618 | -0.201197926 | 3.551212949 | 0.831842847 | 0.997105243 | NA |
| ASV_16s_18729 | 0.121933889 | -0.141686715 | 3.551387735 | 0.767245089 | 0.997764036 | NA |
| ASV_16s_18730 | 0.122192808 | -0.165350052 | 3.551364458 | 0.767844789 | 0.997758428 | NA |
| ASV_16s_18731 | 0.122192808 | -0.165350052 | 3.551364458 | 0.767844789 | 0.997758428 | NA |
| ASV_16s_18732 | 0.120932438 | -0.182551033 | 3.551362603 | 0.76057367  | 0.997825804 | NA |
| ASV_16s_18733 | 0.121185653 | -0.183566244 | 3.551359483 | 0.761517429 | 0.997817136 | NA |
| ASV_16s_18734 | 0.154738069 | -0.311506764 | 3.551013848 | 0.886921607 | 0.99645243  | NA |
| ASV_16s_18735 | 0.122969565 | -0.234266131 | 3.551311238 | 0.757307113 | 0.997855633 | NA |
| ASV_16s_18736 | 0.122969565 | -0.234266131 | 3.551311238 | 0.757307113 | 0.997855633 | NA |
| ASV_16s_18737 | 0.122969565 | -0.234266131 | 3.551311238 | 0.757307113 | 0.997855633 | NA |
| ASV_16s_18738 | 0.118417403 | -0.239878932 | 3.551350284 | 0.734578026 | 0.99805572  | NA |
| ASV_16s_18739 | 0.129764922 | -0.300264483 | 3.551220164 | 0.759390956 | 0.997836636 | NA |
| ASV_16s_18740 | 0.121461684 | -0.273113051 | 3.551304409 | 0.734196335 | 0.99805897  | NA |
| ASV_16s_18741 | 0.12070204  | -0.270502166 | 3.551312702 | 0.731947059 | 0.998078048 | NA |
| ASV_16s_18742 | 0.119694885 | -0.289336241 | 3.551313849 | 0.717314012 | 0.998199138 | NA |
| ASV_16s_18743 | 0.136921565 | -0.363186623 | 3.551146458 | 0.750504191 | 0.997916882 | NA |
| ASV_16s_18744 | 0.120465937 | -0.335732193 | 3.551287922 | 0.684639063 | 0.998450999 | NA |
| ASV_16s_18745 | 0.123003789 | -0.365877326 | 3.55126009  | 0.671345213 | 0.998546349 | NA |
| ASV_16s_18746 | 0.042294052 | -0.142449717 | 3.551845428 | 0.251418783 | 0.999945073 | NA |
| ASV_16s_18747 | 0.164593566 | -0.576438268 | 3.550967698 | 0.62086604  | 0.998872664 | NA |
| ASV_16s_18748 | 0.161410804 | -0.570420665 | 3.55098664  | 0.616164288 | NA          | NA |
| ASV_16s_18749 | 0.161410804 | -0.570420665 | 3.55098664  | 0.616164288 | NA          | NA |
| ASV_16s_18750 | 0.161410804 | -0.570420665 | 3.55098664  | 0.616164288 | NA          | NA |
| ASV_16s_18751 | 0.161410804 | -0.570420665 | 3.55098664  | 0.616164288 | NA          | NA |
| ASV_16s_18752 | 0.163674474 | -0.574742831 | 3.550973092 | 0.620904221 | 0.998872438 | NA |
| ASV_16s_18753 | 0.15445612  | -0.556671371 | 3.551030018 | 0.601283654 | 0.998984678 | NA |
| ASV_16s_18754 | 0.164196859 | -0.575719708 | 3.550969983 | 0.621987458 | 0.99886601  | NA |
| ASV_16s_18755 | 0.153528829 | -0.554795016 | 3.551036031 | 0.59926258  | 0.998995793 | NA |
| ASV_16s_18756 | 0.156891828 | -0.561549228 | 3.551014491 | 0.606474289 | 0.998955752 | NA |
| ASV_16s_18757 | 0.154225343 | -0.556204477 | 3.551031512 | 0.600618237 | 0.998988347 | NA |
| ASV_16s_18758 | 0.159501663 | -0.566699916 | 3.550998262 | 0.612120014 | 0.998923666 | NA |
| ASV_16s_18759 | 0.166460528 | -0.579918226 | 3.550956692 | 0.626647554 | NA          | NA |
| ASV_16s_18760 | 0.166460528 | -0.579918226 | 3.550956692 | 0.626647554 | NA          | NA |
| ASV_16s_18761 | 0.166460528 | -0.579918226 | 3.550956692 | 0.626647554 | NA          | NA |
| ASV_16s_18762 | 0.166460528 | -0.579918226 | 3.550956692 | 0.626647554 | NA          | NA |
| ASV_16s_18763 | 0.160720562 | -0.569077258 | 3.550990827 | 0.614701703 | 0.998908776 | NA |
| ASV_16s_18764 | 0.147965082 | -0.54331081  | 3.551073331 | 0.586967499 | NA          | NA |
| ASV_16s_18765 | 0.143191999 | -0.53308786  | 3.551107264 | 0.573168626 | 0.999132029 | NA |
| ASV_16s_18766 | 0.138557458 | -0.52182516  | 3.551136431 | 0.561828675 | 0.999187126 | NA |
| ASV_16s_18767 | 0.132378069 | -0.50625596  | 3.551176183 | 0.546963756 | 0.999255703 | NA |
| ASV_16s_18768 | 0.12718598  | -0.492660896 | 3.551211569 | 0.535454179 | 0.999306029 | NA |
| ASV_16s_18769 | 0.125817672 | -0.488971597 | 3.551221142 | 0.533684797 | NA          | NA |
| ASV_16s_18770 | 0.125817672 | -0.488971597 | 3.551221142 | 0.533684797 | NA          | NA |
| ASV_16s_18771 | 0.125817672 | -0.488971597 | 3.551221142 | 0.533684797 | NA          | NA |
| ASV_16s_18772 | 0.125817672 | -0.488971597 | 3.551221142 | 0.533684797 | NA          | NA |
| ASV_16s_18773 | 0.125817672 | -0.488971597 | 3.551221142 | 0.533684797 | NA          | NA |
| ASV_16s_18774 | 0.120753377 | -0.474901174 | 3.551258248 | 0.520490259 | 0.999367942 | NA |
| ASV_16s_18775 | 0.118474444 | -0.468394104 | 3.551275731 | 0.514426526 | NA          | NA |
| ASV_16s_18776 | 0.118474444 | -0.468394104 | 3.551275731 | 0.514426526 | NA          | NA |
| ASV_16s_18777 | 0.118474444 | -0.468394104 | 3.551275731 | 0.514426526 | NA          | NA |
| ASV_16s_18778 | 0.118474444 | -0.468394104 | 3.551275731 | 0.514426526 | NA          | NA |
| ASV_16s_18779 | 0.118474444 | -0.468394104 | 3.551275731 | 0.514426526 | NA          | NA |
| ASV_16s_18780 | 0.118474444 | -0.468394104 | 3.551275731 | 0.514426526 | NA          | NA |
| ASV_16s_18781 | 0.118474444 | -0.468394104 | 3.551275731 | 0.514426526 | NA          | NA |
| ASV_16s_18782 | 0.118474444 | -0.468394104 | 3.551275731 | 0.514426526 | NA          | NA |

|               |             |              |             |             |             |    |
|---------------|-------------|--------------|-------------|-------------|-------------|----|
| ASV_16s_18783 | 0.033481613 | -0.146414423 | 3.551190545 | 0.135282125 | NA          | NA |
| ASV_16s_18785 | 0.141335025 | -0.013133513 | 3.551358777 | 0.763923479 | 0.997794933 | NA |
| ASV_16s_18786 | 0.144805392 | -0.501688739 | 3.551224064 | 0.565384023 | NA          | NA |
| ASV_16s_18787 | 0.113869406 | -0.250269788 | 3.551092957 | 0.37237855  | NA          | NA |
| ASV_16s_18788 | 0.154720722 | -0.52680561  | 3.551117327 | 0.605989482 | 0.998958477 | NA |
| ASV_16s_18789 | 0.168139832 | -0.450151875 | 3.551166    | 0.772851178 | 0.997711245 | NA |
| ASV_16s_18790 | 0.123587928 | -0.11236234  | 3.551754245 | 0.549993607 | 0.999242056 | NA |
| ASV_16s_18791 | 0.122550189 | -0.466060848 | 3.55133151  | 0.466193997 | NA          | NA |
| ASV_16s_18792 | 0.161292603 | -0.21307212  | 3.550861167 | 0.623604422 | NA          | NA |
| ASV_16s_18793 | 0.136753138 | -0.084161537 | 3.551646561 | 0.616646348 | 0.998897469 | NA |
| ASV_16s_18794 | 0.16172011  | -0.538767443 | 3.550949271 | 0.68125267  | 0.998475672 | NA |
| ASV_16s_18795 | 0.153141912 | -0.511991712 | 3.55103009  | 0.655644292 | 0.998653819 | NA |
| ASV_16s_18796 | 0.155404559 | -0.450498974 | 3.551335693 | 0.503989899 | 0.99943174  | NA |
| ASV_16s_18797 | 0.124831374 | 0.639495255  | 3.551834301 | 0.57885082  | 0.999103497 | NA |
| ASV_16s_18798 | 0.158702379 | -0.03931822  | 3.551848697 | 0.525273103 | 0.999348579 | NA |
| ASV_16s_18799 | 0.181821027 | -0.987467004 | 3.550819521 | 0.298175523 | 0.999902007 | NA |
| ASV_16s_18800 | 0.159101485 | -0.482232499 | 3.550906506 | 0.717142135 | 0.998200529 | NA |
| ASV_16s_18801 | 0.149044546 | -0.43363447  | 3.55098288  | 0.692146044 | 0.998395358 | NA |
| ASV_16s_18802 | 0.148283848 | -0.416033775 | 3.550986688 | 0.695023666 | 0.998373681 | NA |
| ASV_16s_18803 | 0.124974897 | 0.033647925  | 3.551183108 | 0.591542655 | 0.999037497 | NA |
| ASV_16s_18804 | 0.123778609 | 0.311016298  | 3.551883439 | 0.398506013 | 0.999739839 | NA |
| ASV_16s_18805 | 0.148081185 | -0.392716855 | 3.550982461 | 0.70330393  | 0.998310222 | NA |
| ASV_16s_18806 | 0.133686706 | -0.090775579 | 3.551232467 | 0.698959517 | 0.998343719 | NA |
| ASV_16s_18807 | 0.128092548 | 0.674069489  | 3.551580412 | 0.624463499 | 0.998851223 | NA |
| ASV_16s_18808 | 0.156648471 | -0.383114156 | 3.550903743 | 0.744625138 | 0.997968872 | NA |
| ASV_16s_18809 | 0.156648471 | -0.383114156 | 3.550903743 | 0.744625138 | 0.997968872 | NA |
| ASV_16s_18810 | 0.156648471 | -0.383114156 | 3.550903743 | 0.744625138 | 0.997968872 | NA |
| ASV_16s_18811 | 0.158033119 | -0.383120372 | 3.550892981 | 0.750600043 | 0.997916027 | NA |
| ASV_16s_18812 | 0.13816611  | 0.677707917  | 3.551384962 | 0.665238923 | 0.998588801 | NA |
| ASV_16s_18813 | 0.144875422 | -0.350574425 | 3.551010903 | 0.701462366 | 0.998324475 | NA |
| ASV_16s_18814 | 0.142220179 | -0.314839488 | 3.551010991 | 0.696224413 | 0.998364579 | NA |
| ASV_16s_18815 | 0.127475072 | 0.148284409  | 3.551085552 | 0.617049257 | 0.998895117 | NA |
| ASV_16s_18816 | 0.132560208 | 0.304649015  | 3.551513762 | 0.464243477 | 0.999567161 | NA |
| ASV_16s_18817 | 0.153617404 | 0.18323399   | 3.550019104 | 0.685484429 | 0.998444798 | NA |
| ASV_16s_18818 | 0.190696868 | 0.978848669  | 3.551335874 | 0.587238996 | 0.999060231 | NA |
| ASV_16s_18819 | 0.145178305 | 0.485224774  | 3.551189695 | 0.813782629 | 0.99730074  | NA |
| ASV_16s_18820 | 0.177888094 | -0.074089698 | 3.551290506 | 0.644323431 | 0.998727292 | NA |
| ASV_16s_18821 | 0.131259632 | -0.081375586 | 3.551067485 | 0.678217655 | NA          | NA |
| ASV_16s_18822 | 0.170630057 | 0.728267628  | 3.551280013 | 0.812523278 | NA          | NA |
| ASV_16s_18823 | 0.151590911 | 0.050641278  | 3.551054878 | 0.691553137 | 0.9983998   | NA |
| ASV_16s_18824 | 0.145833887 | -0.080951355 | 3.550967544 | 0.740339471 | NA          | NA |
| ASV_16s_18825 | 0.151914555 | 0.4807409    | 3.551041644 | 0.712623209 | 0.998236855 | NA |
| ASV_16s_18826 | 0.155418998 | 1.059429831  | 3.551316636 | 0.545813465 | NA          | NA |
| ASV_16s_18827 | 0.172519799 | 0.153046348  | 3.550812758 | 0.541814124 | 0.999278515 | NA |
| ASV_16s_18828 | 0.164674892 | 1.152008505  | 3.551180571 | 0.570190913 | NA          | NA |
| ASV_16s_18829 | 0.139129731 | 1.394904066  | 3.551326136 | 0.263408554 | 0.999935644 | NA |
| ASV_16s_18830 | 0.131162813 | 1.073043229  | 3.55137075  | 0.494689016 | NA          | NA |
| ASV_16s_18831 | 0.140075144 | 1.096199647  | 3.551315631 | 0.516032334 | NA          | NA |
| ASV_16s_18832 | 0.147587735 | 1.114697357  | 3.551273295 | 0.533315875 | NA          | NA |
| ASV_16s_18833 | 0.168997107 | 1.486096732  | 3.550922902 | 0.325460381 | 0.999868263 | NA |
| ASV_16s_18834 | 0.135411559 | 1.084255496  | 3.551343762 | 0.504970658 | NA          | NA |
| ASV_16s_18835 | 0.135411559 | 1.084255496  | 3.551343762 | 0.504970658 | NA          | NA |
| ASV_16s_18836 | 0.135411559 | 1.084255496  | 3.551343762 | 0.504970658 | NA          | NA |
| ASV_16s_18837 | 0.162490781 | 0.85423359   | 3.551156152 | 0.866161396 | 0.996708678 | NA |
| ASV_16s_18838 | 0.128379463 | 0.342818056  | 3.551888269 | 0.523469124 | NA          | NA |
| ASV_16s_18839 | 0.128379463 | 0.342818056  | 3.551888269 | 0.523469124 | NA          | NA |
| ASV_16s_18840 | 0.135450209 | 0.801720843  | 3.551750871 | 0.451350917 | 0.999605839 | NA |
| ASV_16s_18841 | 0.155418998 | 0.351638736  | 3.551779086 | 0.585844702 | NA          | NA |
| ASV_16s_18842 | 0.155418998 | 0.351638736  | 3.551779086 | 0.585844702 | NA          | NA |
| ASV_16s_18843 | 0.155418998 | 0.351638736  | 3.551779086 | 0.585844702 | NA          | NA |
| ASV_16s_18844 | 0.120036194 | 0.042519607  | 3.551607068 | 0.696271753 | 0.998364219 | NA |
| ASV_16s_18845 | 0.177310835 | -0.499158797 | 3.551116857 | 0.40235753  | 0.999731331 | NA |
| ASV_16s_18846 | 0.160140991 | 0.353925897  | 3.551751478 | 0.595704083 | NA          | NA |
| ASV_16s_18847 | 0.159658761 | -0.511972319 | 3.551020686 | 0.59682406  | 0.999009095 | NA |
| ASV_16s_18848 | 0.166460528 | -0.519934426 | 3.550953582 | 0.612024564 | NA          | NA |
| ASV_16s_18849 | 0.166460528 | -0.519934426 | 3.550953582 | 0.612024564 | NA          | NA |
| ASV_16s_18850 | 0.268674825 | -0.865986835 | 3.550375918 | 0.559964945 | NA          | NA |

|               |             |              |             |             |             |    |
|---------------|-------------|--------------|-------------|-------------|-------------|----|
| ASV_16s_18851 | 0.19482888  | 0.562260634  | 3.551115596 | 0.575474449 | 0.999120526 | NA |
| ASV_16s_18852 | 0.14302894  | -0.488641384 | 3.551186705 | 0.563650626 | NA          | NA |
| ASV_16s_18853 | 0.175082019 | -0.854254749 | 3.551047585 | 0.322869841 | 0.999871768 | NA |
| ASV_16s_18854 | 0.17680423  | 1.486329633  | 3.550972019 | 0.360955016 | 0.99981332  | NA |
| ASV_16s_18855 | 0.147311114 | 1.149745537  | 3.551035805 | 0.473997758 | NA          | NA |
| ASV_16s_18856 | 0.076882211 | 0.939864293  | 3.551524819 | 0.288566467 | NA          | NA |
| ASV_16s_18857 | 0.131803193 | 1.113385581  | 3.551115173 | 0.438057205 | NA          | NA |
| ASV_16s_18858 | 0.131803193 | 1.113385581  | 3.551115173 | 0.438057205 | NA          | NA |
| ASV_16s_18859 | 0.131803193 | 1.113385581  | 3.551115173 | 0.438057205 | NA          | NA |
| ASV_16s_18860 | 0.166602669 | 0.377355179  | 3.551356193 | 0.543819981 | NA          | NA |
| ASV_16s_18861 | 0.166602669 | 0.377355179  | 3.551356193 | 0.543819981 | NA          | NA |
| ASV_16s_18862 | 0.132898322 | 0.170054238  | 3.551241081 | 0.674871324 | 0.998521451 | NA |
| ASV_16s_18863 | 0.151134394 | 0.370311251  | 3.551441581 | 0.512113502 | NA          | NA |
| ASV_16s_18864 | 0.137223835 | 0.36419234   | 3.551525156 | 0.481458635 | NA          | NA |
| ASV_16s_18865 | 0.113276656 | 0.352767087  | 3.551635118 | 0.422693592 | NA          | NA |
| ASV_16s_18866 | 0.122561327 | 0.357450924  | 3.551593378 | 0.446361696 | NA          | NA |
| ASV_16s_18867 | 0.122561327 | 0.357450924  | 3.551593378 | 0.446361696 | NA          | NA |
| ASV_16s_18868 | 0.177671636 | 0.877142864  | 3.550748508 | 0.867510542 | 0.996692404 | NA |
| ASV_16s_18869 | 0.042674809 | 0.340327476  | 3.551901853 | 0.193175661 | 0.999977663 | NA |
| ASV_16s_18870 | 0.068860064 | -0.301785679 | 3.551484369 | 0.293101316 | NA          | NA |
| ASV_16s_18871 | 0.068860064 | -0.301785679 | 3.551484369 | 0.293101316 | NA          | NA |
| ASV_16s_18872 | 0.07664415  | -0.333208294 | 3.551428417 | 0.319523563 | NA          | NA |
| ASV_16s_18873 | 0.07664415  | -0.333208294 | 3.551428417 | 0.319523563 | NA          | NA |
| ASV_16s_18874 | 0.07664415  | -0.333208294 | 3.551428417 | 0.319523563 | NA          | NA |
| ASV_16s_18875 | 0.060758649 | 0.87147281   | 3.551668464 | 0.236438493 | 0.999955442 | NA |
| ASV_16s_18876 | 0.150327833 | 1.15608868   | 3.551020378 | 0.480650277 | NA          | NA |
| ASV_16s_18877 | 0.137223835 | -0.078294336 | 3.550912546 | 0.756027061 | NA          | NA |
| ASV_16s_18878 | 0.137223835 | -0.078294336 | 3.550912546 | 0.756027061 | NA          | NA |
| ASV_16s_18879 | 0.128860452 | -0.078208023 | 3.550938229 | 0.727373123 | 0.99811646  | NA |
| ASV_16s_18880 | 0.117012325 | -0.07806494  | 3.550980832 | 0.684491914 | NA          | NA |
| ASV_16s_18881 | 0.117012325 | -0.07806494  | 3.550980832 | 0.684491914 | NA          | NA |
| ASV_16s_18882 | 0.117012325 | -0.07806494  | 3.550980832 | 0.684491914 | NA          | NA |
| ASV_16s_18883 | 0.117012325 | -0.07806494  | 3.550980832 | 0.684491914 | NA          | NA |
| ASV_16s_18884 | 0.117012325 | -0.07806494  | 3.550980832 | 0.684491914 | NA          | NA |
| ASV_16s_18885 | 0.117012325 | -0.07806494  | 3.550980832 | 0.684491914 | NA          | NA |
| ASV_16s_18886 | 0.087111631 | 0.220184177  | 3.550908742 | 0.403254835 | NA          | NA |
| ASV_16s_18887 | 0.087111631 | 0.220184177  | 3.550908742 | 0.403254835 | NA          | NA |
| ASV_16s_18888 | 0.086937675 | 0.220184678  | 3.550909403 | 0.402483425 | NA          | NA |
| ASV_16s_18889 | 0.086937675 | 0.220184678  | 3.550909403 | 0.402483425 | NA          | NA |
| ASV_16s_18890 | 0.086937675 | 0.220184678  | 3.550909403 | 0.402483425 | NA          | NA |
| ASV_16s_18891 | 0.140060831 | 0.310951238  | 3.551054561 | 0.745620392 | NA          | NA |
| ASV_16s_18892 | 0.135793579 | 0.310952032  | 3.55106912  | 0.731423797 | 0.998082468 | NA |
| ASV_16s_18893 | 0.151185848 | 0.310949032  | 3.551020444 | 0.781207062 | NA          | NA |
| ASV_16s_18894 | 0.149952634 | 0.31094926   | 3.551023978 | 0.777359226 | 0.997668203 | NA |
| ASV_16s_18895 | 0.129638877 | 0.310953644  | 3.551091793 | 0.710467407 | NA          | NA |
| ASV_16s_18896 | 0.129638877 | 0.310953644  | 3.551091793 | 0.710467407 | NA          | NA |
| ASV_16s_18897 | 0.14820558  | 0.310949591  | 3.551029084 | 0.771871434 | NA          | NA |
| ASV_16s_18898 | 0.091765228 | 0.59569346   | 3.550849087 | 0.368352995 | NA          | NA |
| ASV_16s_18899 | 0.091765228 | 0.59569346   | 3.550849087 | 0.368352995 | NA          | NA |
| ASV_16s_18900 | 0.091765228 | 0.59569346   | 3.550849087 | 0.368352995 | NA          | NA |
| ASV_16s_18901 | 0.15506217  | 0.687544751  | 3.550982159 | 0.730470769 | NA          | NA |
| ASV_16s_18902 | 0.180526106 | 0.522552505  | 3.55157413  | 0.447513624 | 0.999616878 | NA |
| ASV_16s_18903 | 0.189875552 | 1.396046023  | 3.550984621 | 0.331224796 | 0.999860225 | NA |
| ASV_16s_18904 | 0.175559554 | -0.679523491 | 3.551072324 | 0.467072932 | 0.999558339 | NA |
| ASV_16s_18905 | 0.172641012 | 0.728309693  | 3.551417559 | 0.754030616 | 0.997885279 | NA |
| ASV_16s_18906 | 0.124940619 | -0.056702768 | 3.551197452 | 0.798108585 | 0.997463208 | NA |
| ASV_16s_18907 | 0.180086483 | 1.371877019  | 3.551181021 | 0.337330692 | 0.999851348 | NA |
| ASV_16s_18908 | 0.125436137 | -0.053296706 | 3.551230077 | 0.796532545 | 0.997479179 | NA |
| ASV_16s_18909 | 0.149443038 | 0.893445887  | 3.551522746 | 0.464556998 | 0.999566189 | NA |
| ASV_16s_18910 | 0.139725466 | 1.040427055  | 3.551276563 | 0.496699937 | 0.999458475 | NA |
| ASV_16s_18911 | 0.152332826 | 0.364867341  | 3.551656798 | 0.547379639 | 0.99925384  | NA |
| ASV_16s_18912 | 0.144725104 | -0.382831956 | 3.550906962 | 0.616719883 | NA          | NA |
| ASV_16s_18913 | 0.182272556 | 0.329560523  | 3.551857104 | 0.346712369 | 0.99983696  | NA |
| ASV_16s_18914 | 0.143010414 | 0.494733085  | 3.551116482 | 0.619181565 | NA          | NA |
| ASV_16s_18915 | 0.194048092 | 1.125773565  | 3.551071029 | 0.621378992 | NA          | NA |
| ASV_16s_18916 | 0.058580619 | 0.291232135  | 3.551887309 | 0.309056917 | 0.999889375 | NA |
| ASV_16s_18917 | 0.209401129 | 0.279565026  | 3.551522188 | 0.704482952 | NA          | NA |



|               |             |              |             |             |             |    |
|---------------|-------------|--------------|-------------|-------------|-------------|----|
| ASV_16s_18918 | 0.037880314 | -0.103849711 | 3.551824302 | 0.22346046  | 0.999963247 | NA |
| ASV_16s_18919 | 0.244158809 | 1.357969158  | 3.550808478 | 0.542140937 | 0.999277082 | NA |
| ASV_16s_18920 | 0.267270825 | -0.563292349 | 3.550197342 | 0.785087568 | NA          | NA |
| ASV_16s_18921 | 0.226265391 | 0.344974663  | 3.551478053 | 0.534036493 | 0.999312063 | NA |
| ASV_16s_18922 | 0.161206301 | 0.328457191  | 3.551465156 | 0.462810765 | NA          | NA |
| ASV_16s_18923 | 0.172330292 | 1.1965397    | 3.550910675 | 0.526223771 | NA          | NA |
| ASV_16s_18924 | 0.172330292 | 1.1965397    | 3.550910675 | 0.526223771 | NA          | NA |
| ASV_16s_18925 | 0.195550618 | 1.099978625  | 3.550578484 | 0.819592356 | 0.997238828 | NA |
| ASV_16s_18926 | 0.167468209 | 0.801869055  | 3.550992625 | 0.748161231 | 0.997937705 | NA |
| ASV_16s_18927 | 0.153226111 | 0.6870436    | 3.551082275 | 0.705674521 | NA          | NA |
| ASV_16s_18928 | 0.098199417 | -0.077769356 | 3.551069427 | 0.610036122 | NA          | NA |
| ASV_16s_18929 | 0.098199417 | -0.077769356 | 3.551069427 | 0.610036122 | NA          | NA |
| ASV_16s_18930 | 0.098199417 | -0.077769356 | 3.551069427 | 0.610036122 | NA          | NA |
| ASV_16s_18931 | 0.098199417 | -0.077769356 | 3.551069427 | 0.610036122 | NA          | NA |
| ASV_16s_18932 | 0.228975444 | 0.738203068  | 3.550984266 | 1.130421316 | 0.992441713 | NA |
| ASV_16s_18933 | 0.210798046 | 0.348010439  | 3.550380554 | 1.184260807 | 0.991284785 | NA |
| ASV_16s_18934 | 0.215749498 | 0.325509427  | 3.550926704 | 1.523732017 | 0.981476666 | NA |
| ASV_16s_18935 | 0.216760685 | -0.028859098 | 3.550894238 | 1.033521118 | NA          | NA |
| ASV_16s_18936 | 0.233715334 | 0.218767945  | 3.550879899 | 1.562083832 | 0.980082155 | NA |
| ASV_16s_18937 | 0.178363585 | 0.325837258  | 3.55065713  | 1.043862232 | 0.994089608 | NA |
| ASV_16s_18938 | 0.18448157  | 0.371086141  | 3.550669193 | 0.990717191 | 0.994976894 | NA |
| ASV_16s_18939 | 0.16657438  | 0.263585019  | 3.550980431 | 0.962044152 | 0.9954178   | NA |
| ASV_16s_18940 | 0.129560366 | -0.028108449 | 3.551144228 | 0.788864707 | NA          | NA |
| ASV_16s_18941 | 0.129560366 | -0.028108449 | 3.551144228 | 0.788864707 | NA          | NA |
| ASV_16s_18942 | 0.129560366 | -0.028108449 | 3.551144228 | 0.788864707 | NA          | NA |
| ASV_16s_18943 | 0.129560366 | -0.028108449 | 3.551144228 | 0.788864707 | NA          | NA |
| ASV_16s_18944 | 0.129560366 | -0.028108449 | 3.551144228 | 0.788864707 | NA          | NA |
| ASV_16s_18945 | 0.148039207 | -0.073260134 | 3.550920282 | 0.815282359 | NA          | NA |
| ASV_16s_18946 | 0.148039207 | -0.073260134 | 3.550920282 | 0.815282359 | NA          | NA |
| ASV_16s_18947 | 0.108121857 | -0.072737461 | 3.551069126 | 0.67439071  | NA          | NA |
| ASV_16s_18948 | 0.108121857 | -0.072737461 | 3.551069126 | 0.67439071  | NA          | NA |
| ASV_16s_18949 | 0.108121857 | -0.072737461 | 3.551069126 | 0.67439071  | NA          | NA |
| ASV_16s_18950 | 0.108121857 | -0.072737461 | 3.551069126 | 0.67439071  | NA          | NA |
| ASV_16s_18951 | 0.106179088 | -0.072702054 | 3.551079199 | 0.666686828 | NA          | NA |
| ASV_16s_18952 | 0.106179088 | -0.072702054 | 3.551079199 | 0.666686828 | NA          | NA |
| ASV_16s_18953 | 0.106179088 | -0.072702054 | 3.551079199 | 0.666686828 | NA          | NA |
| ASV_16s_18954 | 0.106179088 | -0.072702054 | 3.551079199 | 0.666686828 | NA          | NA |
| ASV_16s_18955 | 0.106179088 | -0.072702054 | 3.551079199 | 0.666686828 | NA          | NA |
| ASV_16s_18956 | 0.154061348 | 0.316613847  | 3.550809933 | 0.911252645 | 0.996136004 | NA |
| ASV_16s_18957 | 0.140503742 | 0.728682985  | 3.551200766 | 0.809732042 | 0.997343362 | NA |
| ASV_16s_18958 | 0.138681572 | 0.327769931  | 3.551248924 | 0.642409667 | NA          | NA |
| ASV_16s_18959 | 0.158823291 | 0.334249846  | 3.551283751 | 0.649750019 | 0.99869275  | NA |
| ASV_16s_18960 | 0.131382357 | 0.36023965   | 3.551363704 | 0.778079426 | NA          | NA |
| ASV_16s_18961 | 0.169425603 | 0.644268358  | 3.551154594 | 1.099672241 | 0.993056567 | NA |
| ASV_16s_18962 | 0.131382357 | 0.36023965   | 3.551363704 | 0.778079426 | NA          | NA |
| ASV_16s_18963 | 0.131382357 | 0.36023965   | 3.551363704 | 0.778079426 | NA          | NA |
| ASV_16s_18964 | 0.131382357 | 0.36023965   | 3.551363704 | 0.778079426 | NA          | NA |
| ASV_16s_18965 | 0.131382357 | 0.36023965   | 3.551363704 | 0.778079426 | NA          | NA |
| ASV_16s_18966 | 0.131382357 | 0.36023965   | 3.551363704 | 0.778079426 | NA          | NA |
| ASV_16s_18967 | 0.131382357 | 0.36023965   | 3.551363704 | 0.778079426 | NA          | NA |
| ASV_16s_18968 | 0.131382357 | 0.36023965   | 3.551363704 | 0.778079426 | NA          | NA |
| ASV_16s_18969 | 0.131382357 | 0.36023965   | 3.551363704 | 0.778079426 | NA          | NA |
| ASV_16s_18970 | 0.131382357 | 0.36023965   | 3.551363704 | 0.778079426 | NA          | NA |
| ASV_16s_18971 | 0.131382357 | 0.36023965   | 3.551363704 | 0.778079426 | NA          | NA |
| ASV_16s_18972 | 0.131382357 | 0.36023965   | 3.551363704 | 0.778079426 | NA          | NA |
| ASV_16s_18973 | 0.131382357 | 0.36023965   | 3.551363704 | 0.778079426 | NA          | NA |
| ASV_16s_18974 | 0.170231408 | 0.315939831  | 3.551008445 | 0.860521907 | NA          | NA |
| ASV_16s_18975 | 0.170231408 | 0.315939831  | 3.551008445 | 0.860521907 | NA          | NA |
| ASV_16s_18976 | 0.15543491  | 0.315939886  | 3.551048266 | 0.8147718   | 0.997290264 | NA |
| ASV_16s_18977 | 0.154296718 | 0.315939891  | 3.551051642 | 0.811265828 | 0.997327275 | NA |
| ASV_16s_18978 | 0.153158525 | 0.315939896  | 3.551055068 | 0.807762035 | 0.99736393  | NA |
| ASV_16s_18979 | 0.142914796 | 0.315939944  | 3.551088331 | 0.776352262 | 0.997677863 | NA |
| ASV_16s_18980 | 0.147147508 | 0.315939923  | 3.551074018 | 0.791318591 | NA          | NA |
| ASV_16s_18981 | 0.147147508 | 0.315939923  | 3.551074018 | 0.791318591 | NA          | NA |
| ASV_16s_18982 | 0.140645792 | 0.315939955  | 3.551096341 | 0.770332316 | 0.997735065 | NA |
| ASV_16s_18983 | 0.192481605 | 0.518729443  | 3.550917586 | 1.309398843 | 0.988186177 | NA |
| ASV_16s_18984 | 0.168679782 | 0.315939836  | 3.551012369 | 0.851744404 | 0.996879328 | NA |

|               |             |             |             |             |             |    |
|---------------|-------------|-------------|-------------|-------------|-------------|----|
| ASV_16s_18985 | 0.152951809 | 0.315939897 | 3.551055744 | 0.805180653 | 0.997390723 | NA |
| ASV_16s_18986 | 0.137223835 | 0.315939973 | 3.551108931 | 0.75901077  | NA          | NA |
| ASV_16s_18987 | 0.137223835 | 0.315939973 | 3.551108931 | 0.75901077  | NA          | NA |
| ASV_16s_18988 | 0.137223835 | 0.315939973 | 3.551108931 | 0.75901077  | NA          | NA |
| ASV_16s_18989 | 0.137223835 | 0.315939973 | 3.551108931 | 0.75901077  | NA          | NA |
| ASV_16s_18990 | 0.137223835 | 0.315939973 | 3.551108931 | 0.75901077  | NA          | NA |
| ASV_16s_18991 | 0.137223835 | 0.315939973 | 3.551108931 | 0.75901077  | NA          | NA |
| ASV_16s_18992 | 0.137223835 | 0.315939973 | 3.551108931 | 0.75901077  | NA          | NA |
| ASV_16s_18993 | 0.137223835 | 0.315939973 | 3.551108931 | 0.75901077  | NA          | NA |
| ASV_16s_18994 | 0.137223835 | 0.315939973 | 3.551108931 | 0.75901077  | NA          | NA |
| ASV_16s_18995 | 0.137223835 | 0.315939973 | 3.551108931 | 0.75901077  | NA          | NA |
| ASV_16s_18996 | 0.137223835 | 0.315939973 | 3.551108931 | 0.75901077  | NA          | NA |
| ASV_16s_18997 | 0.137223835 | 0.315939973 | 3.551108931 | 0.75901077  | NA          | NA |
| ASV_16s_18998 | 0.137223835 | 0.315939973 | 3.551108931 | 0.75901077  | NA          | NA |
| ASV_16s_18999 | 0.137223835 | 0.315939973 | 3.551108931 | 0.75901077  | NA          | NA |
| ASV_16s_19000 | 0.167901871 | 0.533555489 | 3.550965032 | 1.175699461 | 0.991475691 | NA |
| ASV_16s_19001 | 0.184765184 | 0.596079578 | 3.550698852 | 0.669445908 | NA          | NA |
| ASV_16s_19002 | 0.13068334  | 0.687298763 | 3.551061329 | 0.653909246 | NA          | NA |
| ASV_16s_19003 | 0.13068334  | 0.687298763 | 3.551061329 | 0.653909246 | NA          | NA |
| ASV_16s_19004 | 0.236088595 | 0.688002655 | 3.550835983 | 0.934096461 | NA          | NA |
| ASV_16s_19005 | 0.211631416 | 1.078371265 | 3.550803619 | 0.678552713 | 0.998495155 | NA |
| ASV_16s_19006 | 0.214521359 | 0.733881142 | 3.55107666  | 0.948852137 | NA          | NA |
| ASV_16s_19007 | 0.214521359 | 0.733881142 | 3.55107666  | 0.948852137 | NA          | NA |
| ASV_16s_19008 | 0.214521359 | 0.733881142 | 3.55107666  | 0.948852137 | NA          | NA |
| ASV_16s_19009 | 0.181386966 | 1.027977455 | 3.551021603 | 0.653307638 | 0.998669343 | NA |
| ASV_16s_19010 | 0.19631938  | 0.733721561 | 3.55112273  | 0.905153301 | 0.996216978 | NA |
| ASV_16s_19011 | 0.181530272 | 0.73357081  | 3.551166879 | 0.869530717 | NA          | NA |
| ASV_16s_19012 | 0.181530272 | 0.73357081  | 3.551166879 | 0.869530717 | NA          | NA |
| ASV_16s_19013 | 0.181530272 | 0.73357081  | 3.551166879 | 0.869530717 | NA          | NA |
| ASV_16s_19014 | 0.181530272 | 0.73357081  | 3.551166879 | 0.869530717 | NA          | NA |
| ASV_16s_19015 | 0.181530272 | 0.73357081  | 3.551166879 | 0.869530717 | NA          | NA |
| ASV_16s_19016 | 0.181530272 | 0.73357081  | 3.551166879 | 0.869530717 | NA          | NA |
| ASV_16s_19017 | 0.181530272 | 0.73357081  | 3.551166879 | 0.869530717 | NA          | NA |
| ASV_16s_19018 | 0.181530272 | 0.73357081  | 3.551166879 | 0.869530717 | NA          | NA |
| ASV_16s_19019 | 0.181530272 | 0.73357081  | 3.551166879 | 0.869530717 | NA          | NA |
| ASV_16s_19020 | 0.181530272 | 0.73357081  | 3.551166879 | 0.869530717 | NA          | NA |
| ASV_16s_19021 | 0.181530272 | 0.73357081  | 3.551166879 | 0.869530717 | NA          | NA |
| ASV_16s_19022 | 0.181530272 | 0.73357081  | 3.551166879 | 0.869530717 | NA          | NA |
| ASV_16s_19023 | 0.181530272 | 0.73357081  | 3.551166879 | 0.869530717 | NA          | NA |
| ASV_16s_19024 | 0.089922049 | 0.698008904 | 3.551597864 | 0.565951627 | NA          | NA |
| ASV_16s_19025 | 0.089922049 | 0.698008904 | 3.551597864 | 0.565951627 | NA          | NA |
| ASV_16s_19026 | 0.089922049 | 0.698008904 | 3.551597864 | 0.565951627 | NA          | NA |
| ASV_16s_19027 | 0.089922049 | 0.698008904 | 3.551597864 | 0.565951627 | NA          | NA |
| ASV_16s_19028 | 0.170580703 | 0.692696443 | 3.550986329 | 0.799444388 | 0.997449619 | NA |
| ASV_16s_19029 | 0.171571447 | 0.69270491  | 3.550983841 | 0.80217115  | 0.997421733 | NA |
| ASV_16s_19030 | 0.171571447 | 0.69270491  | 3.550983841 | 0.80217115  | 0.997421733 | NA |
| ASV_16s_19031 | 0.145924664 | 0.692449154 | 3.551059077 | 0.726495332 | 0.998123773 | NA |
| ASV_16s_19032 | 0.195740954 | 0.692885163 | 3.550930882 | 0.863332006 | 0.996742637 | NA |
| ASV_16s_19033 | 0.173552934 | 0.692722734 | 3.550978948 | 0.80758843  | NA          | NA |
| ASV_16s_19034 | 0.173552934 | 0.692722734 | 3.550978948 | 0.80758843  | NA          | NA |
| ASV_16s_19035 | 0.173552934 | 0.692722734 | 3.550978948 | 0.80758843  | NA          | NA |
| ASV_16s_19036 | 0.173552934 | 0.692722734 | 3.550978948 | 0.80758843  | NA          | NA |
| ASV_16s_19037 | 0.173552934 | 0.692722734 | 3.550978948 | 0.80758843  | NA          | NA |
| ASV_16s_19038 | 0.173552934 | 0.692722734 | 3.550978948 | 0.80758843  | NA          | NA |
| ASV_16s_19039 | 0.173552934 | 0.692722734 | 3.550978948 | 0.80758843  | NA          | NA |
| ASV_16s_19040 | 0.164783841 | 0.692644854 | 3.551001498 | 0.783219416 | 0.997611457 | NA |
| ASV_16s_19041 | 0.158520204 | 0.692584945 | 3.551019118 | 0.764319594 | 0.997791263 | NA |
| ASV_16s_19042 | 0.137223835 | 0.692342502 | 3.551090918 | 0.699960716 | NA          | NA |
| ASV_16s_19043 | 0.137223835 | 0.692342502 | 3.551090918 | 0.699960716 | NA          | NA |
| ASV_16s_19044 | 0.137223835 | 0.692342502 | 3.551090918 | 0.699960716 | NA          | NA |
| ASV_16s_19045 | 0.137223835 | 0.692342502 | 3.551090918 | 0.699960716 | NA          | NA |
| ASV_16s_19046 | 0.137223835 | 0.692342502 | 3.551090918 | 0.699960716 | NA          | NA |
| ASV_16s_19047 | 0.137223835 | 0.692342502 | 3.551090918 | 0.699960716 | NA          | NA |
| ASV_16s_19048 | 0.152760271 | 0.692525499 | 3.551036608 | 0.744228601 | 0.997972347 | NA |
| ASV_16s_19049 | 0.161638234 | 0.69261523  | 3.55101021  | 0.769477219 | 0.997743114 | NA |
| ASV_16s_19050 | 0.2108874   | 1.387641277 | 3.550973387 | 0.499249043 | 0.999449226 | NA |
| ASV_16s_19051 | 0.114229404 | 0.29651153  | 3.551882954 | 0.486116838 | NA          | NA |

|               |             |              |             |             |             |    |
|---------------|-------------|--------------|-------------|-------------|-------------|----|
| ASV_16s_19052 | 0.114229404 | 0.29651153   | 3.551882954 | 0.486116838 | NA          | NA |
| ASV_16s_19053 | 0.114229404 | 0.29651153   | 3.551882954 | 0.486116838 | NA          | NA |
| ASV_16s_19054 | 0.114229404 | 0.29651153   | 3.551882954 | 0.486116838 | NA          | NA |
| ASV_16s_19055 | 0.114229404 | 0.29651153   | 3.551882954 | 0.486116838 | NA          | NA |
| ASV_16s_19056 | 0.114229404 | 0.29651153   | 3.551882954 | 0.486116838 | NA          | NA |
| ASV_16s_19057 | 0.114229404 | 0.29651153   | 3.551882954 | 0.486116838 | NA          | NA |
| ASV_16s_19058 | 0.114229404 | 0.29651153   | 3.551882954 | 0.486116838 | NA          | NA |
| ASV_16s_19059 | 0.114229404 | 0.29651153   | 3.551882954 | 0.486116838 | NA          | NA |
| ASV_16s_19060 | 0.114229404 | 0.29651153   | 3.551882954 | 0.486116838 | NA          | NA |
| ASV_16s_19061 | 0.114229404 | 0.29651153   | 3.551882954 | 0.486116838 | NA          | NA |
| ASV_16s_19062 | 0.114229404 | 0.29651153   | 3.551882954 | 0.486116838 | NA          | NA |
| ASV_16s_19063 | 0.114229404 | 0.29651153   | 3.551882954 | 0.486116838 | NA          | NA |
| ASV_16s_19064 | 0.114229404 | 0.29651153   | 3.551882954 | 0.486116838 | NA          | NA |
| ASV_16s_19065 | 0.114229404 | 0.29651153   | 3.551882954 | 0.486116838 | NA          | NA |
| ASV_16s_19066 | 0.114269333 | 0.052096444  | 3.551649117 | 0.671912869 | 0.99854236  | NA |
| ASV_16s_19067 | 0.116559674 | -0.018171035 | 3.551556116 | 0.709481069 | 0.998261823 | NA |
| ASV_16s_19068 | 0.114280741 | -0.004662136 | 3.55158395  | 0.69848386  | 0.998347359 | NA |
| ASV_16s_19069 | 0.116818592 | -0.045502445 | 3.551527109 | 0.720278916 | 0.998175025 | NA |
| ASV_16s_19070 | 0.116818592 | -0.045502445 | 3.551527109 | 0.720278916 | 0.998175025 | NA |
| ASV_16s_19071 | 0.129734917 | -0.108329192 | 3.551354858 | 0.784146721 | 0.997602395 | NA |
| ASV_16s_19072 | 0.116818592 | -0.045502445 | 3.551527109 | 0.720278916 | 0.998175025 | NA |
| ASV_16s_19073 | 0.117077511 | -0.072109416 | 3.551498146 | 0.728909808 | 0.998103612 | NA |
| ASV_16s_19074 | 0.114292149 | -0.057127843 | 3.55153082  | 0.716293761 | 0.998207387 | NA |
| ASV_16s_19075 | 0.139944023 | -0.191299128 | 3.551195496 | 0.841946873 | 0.996991934 | NA |
| ASV_16s_19076 | 0.11733643  | -0.097662734 | 3.551469035 | 0.735468531 | 0.998048123 | NA |
| ASV_16s_19077 | 0.11733643  | -0.097662734 | 3.551469035 | 0.735468531 | 0.998048123 | NA |
| ASV_16s_19078 | 0.114303557 | -0.106931642 | 3.551482918 | 0.725882331 | 0.998128869 | NA |
| ASV_16s_19079 | 0.117595349 | -0.122519619 | 3.551443345 | 0.739646276 | 0.998012223 | NA |
| ASV_16s_19080 | 0.117854268 | -0.146846219 | 3.551420852 | 0.741505653 | 0.997996106 | NA |
| ASV_16s_19081 | 0.118113187 | -0.170928806 | 3.551398672 | 0.741117797 | 0.997999475 | NA |
| ASV_16s_19082 | 0.118113187 | -0.170928806 | 3.551398672 | 0.741117797 | 0.997999475 | NA |
| ASV_16s_19083 | 0.118113187 | -0.170928806 | 3.551398672 | 0.741117797 | 0.997999475 | NA |
| ASV_16s_19084 | 0.145039159 | -0.266007633 | 3.551109582 | 0.853665288 | 0.996856933 | NA |
| ASV_16s_19085 | 0.118372106 | -0.194695406 | 3.551378708 | 0.73856279  | 0.998021576 | NA |
| ASV_16s_19086 | 0.118372106 | -0.194695406 | 3.551378708 | 0.73856279  | 0.998021576 | NA |
| ASV_16s_19087 | 0.114320669 | -0.177762695 | 3.551427075 | 0.723707472 | 0.998146874 | NA |
| ASV_16s_19088 | 0.114326373 | -0.200760814 | 3.551410548 | 0.718854321 | 0.998186637 | NA |
| ASV_16s_19089 | 0.118631024 | -0.218127611 | 3.551361367 | 0.73390348  | 0.998061461 | NA |
| ASV_16s_19090 | 0.114326373 | -0.200760814 | 3.551410548 | 0.718854321 | 0.998186637 | NA |
| ASV_16s_19091 | 0.118889943 | -0.241534065 | 3.55134502  | 0.727205247 | 0.99811786  | NA |
| ASV_16s_19092 | 0.118889943 | -0.241534065 | 3.55134502  | 0.727205247 | 0.99811786  | NA |
| ASV_16s_19093 | 0.116357795 | -0.231957523 | 3.551374388 | 0.718816835 | 0.998186942 | NA |
| ASV_16s_19094 | 0.116628122 | -0.300059164 | 3.551331081 | 0.68627884  | 0.998438957 | NA |
| ASV_16s_19095 | 0.040835637 | -0.133035523 | 3.551853726 | 0.244741319 | 0.999949882 | NA |
| ASV_16s_19096 | 0.040835637 | -0.133035523 | 3.551853726 | 0.244741319 | 0.999949882 | NA |
| ASV_16s_19097 | 0.040835637 | -0.133035523 | 3.551853726 | 0.244741319 | 0.999949882 | NA |
| ASV_16s_19098 | 0.177415004 | -0.599136365 | 3.550895168 | 0.644025813 | 0.99872983  | NA |
| ASV_16s_19099 | 0.169673084 | -0.5856578   | 3.550938711 | 0.62803811  | 0.998829649 | NA |
| ASV_16s_19100 | 0.155844914 | -0.559405233 | 3.551021297 | 0.604201987 | NA          | NA |
| ASV_16s_19101 | 0.150744813 | -0.549037066 | 3.551054625 | 0.593053406 | 0.999029429 | NA |
| ASV_16s_19102 | 0.148890231 | -0.545187268 | 3.551067179 | 0.588578547 | 0.999053194 | NA |
| ASV_16s_19103 | 0.152079101 | -0.551781031 | 3.551045739 | 0.595655762 | 0.999015426 | NA |
| ASV_16s_19104 | 0.148890231 | -0.545187268 | 3.551067179 | 0.588578547 | 0.999053194 | NA |
| ASV_16s_19105 | 0.148426585 | -0.544217505 | 3.551070356 | 0.587497618 | 0.999058876 | NA |
| ASV_16s_19106 | 0.148426585 | -0.544217505 | 3.551070356 | 0.587497618 | 0.999058876 | NA |
| ASV_16s_19107 | 0.16072051  | -0.569020671 | 3.550991003 | 0.614612813 | NA          | NA |
| ASV_16s_19108 | 0.151791674 | -0.551188225 | 3.551047653 | 0.594079428 | 0.999023924 | NA |
| ASV_16s_19109 | 0.149878352 | -0.547240754 | 3.55106047  | 0.58990488  | 0.999046192 | NA |
| ASV_16s_19110 | 0.142862838 | -0.532347248 | 3.551109684 | 0.575276856 | NA          | NA |
| ASV_16s_19111 | 0.142862838 | -0.532347248 | 3.551109684 | 0.575276856 | NA          | NA |
| ASV_16s_19112 | 0.142862838 | -0.532347248 | 3.551109684 | 0.575276856 | NA          | NA |
| ASV_16s_19113 | 0.142862838 | -0.532347248 | 3.551109684 | 0.575276856 | NA          | NA |
| ASV_16s_19114 | 0.142862838 | -0.532347248 | 3.551109684 | 0.575276856 | NA          | NA |
| ASV_16s_19115 | 0.136016979 | -0.515419696 | 3.55115273  | 0.554519933 | 0.999221355 | NA |
| ASV_16s_19116 | 0.138270354 | -0.521060397 | 3.551138385 | 0.560983143 | 0.999191137 | NA |
| ASV_16s_19117 | 0.121479132 | -0.47689001  | 3.551252946 | 0.522320956 | NA          | NA |
| ASV_16s_19118 | 0.121479132 | -0.47689001  | 3.551252946 | 0.522320956 | NA          | NA |

|               |             |              |             |             |             |    |
|---------------|-------------|--------------|-------------|-------------|-------------|----|
| ASV_16s_19119 | 0.121479132 | -0.47689001  | 3.551252946 | 0.522320956 | NA          | NA |
| ASV_16s_19120 | 0.121479132 | -0.47689001  | 3.551252946 | 0.522320956 | NA          | NA |
| ASV_16s_19121 | 0.121479132 | -0.47689001  | 3.551252946 | 0.522320956 | NA          | NA |
| ASV_16s_19122 | 0.14597069  | -0.538980496 | 3.551087621 | 0.576468743 | 0.999115534 | NA |
| ASV_16s_19123 | 0.117934125 | -0.466771242 | 3.551280123 | 0.51288986  | 0.999397902 | NA |
| ASV_16s_19124 | 0.11717448  | -0.464567177 | 3.55128611  | 0.510842085 | 0.999405806 | NA |
| ASV_16s_19125 | 0.11717448  | -0.464567177 | 3.55128611  | 0.510842085 | 0.999405806 | NA |
| ASV_16s_19126 | 0.114389118 | -0.456373242 | 3.551308576 | 0.50327079  | NA          | NA |
| ASV_16s_19127 | 0.114389118 | -0.456373242 | 3.551308576 | 0.50327079  | NA          | NA |
| ASV_16s_19128 | 0.114389118 | -0.456373242 | 3.551308576 | 0.50327079  | NA          | NA |
| ASV_16s_19129 | 0.114389118 | -0.456373242 | 3.551308576 | 0.50327079  | NA          | NA |
| ASV_16s_19130 | 0.114389118 | -0.456373242 | 3.551308576 | 0.50327079  | NA          | NA |
| ASV_16s_19131 | 0.114389118 | -0.456373242 | 3.551308576 | 0.50327079  | NA          | NA |
| ASV_16s_19132 | 0.174230181 | -0.593870733 | 3.55091335  | 0.640121325 | NA          | NA |
| ASV_16s_19133 | 0.025332337 | -0.130544653 | 3.551340605 | 0.080800728 | NA          | NA |
| ASV_16s_19134 | 0.021958723 | -0.115515495 | 3.551408282 | 0.057569594 | NA          | NA |
| ASV_16s_19135 | 0.050805735 | 0.221901399  | 3.551131153 | 0.220372456 | NA          | NA |
| ASV_16s_19137 | 0.178393971 | 0.596066244  | 3.550704174 | 0.652161695 | NA          | NA |
| ASV_16s_19138 | 0.16072051  | 0.687591628  | 3.550967235 | 0.746896394 | NA          | NA |
| ASV_16s_19139 | 0.147060169 | -0.531641731 | 3.551127369 | 0.560074301 | 0.999195433 | NA |
| ASV_16s_19140 | 0.118171006 | -0.057769622 | 3.551632323 | 0.641098251 | 0.998748519 | NA |
| ASV_16s_19141 | 0.120898739 | -0.172520576 | 3.551454933 | 0.477065338 | 0.999526201 | NA |
| ASV_16s_19142 | 0.155028212 | -0.527885504 | 3.551114063 | 0.603554996 | 0.998972088 | NA |
| ASV_16s_19143 | 0.126408273 | 0.622180564  | 3.551878669 | 0.552896413 | 0.999228824 | NA |
| ASV_16s_19144 | 0.147582991 | -0.194836668 | 3.551608547 | 0.5985768   | 0.998999546 | NA |
| ASV_16s_19145 | 0.149936403 | -0.521648994 | 3.551107107 | 0.609165811 | 0.998940537 | NA |
| ASV_16s_19146 | 0.147466908 | -0.511185227 | 3.551136799 | 0.604078807 | 0.998969169 | NA |
| ASV_16s_19147 | 0.151635391 | -0.516963997 | 3.551060281 | 0.632750305 | 0.998800797 | NA |
| ASV_16s_19148 | 0.149475707 | -0.447488132 | 3.551361791 | 0.483190575 | 0.999505733 | NA |
| ASV_16s_19149 | 0.129583184 | -0.06931701  | 3.551224337 | 0.588400412 | 0.999054132 | NA |
| ASV_16s_19150 | 0.147725945 | -0.50642532  | 3.55110081  | 0.627778862 | 0.998831223 | NA |
| ASV_16s_19151 | 0.145653444 | -0.486972814 | 3.551097979 | 0.629186859 | 0.998822659 | NA |
| ASV_16s_19152 | 0.150240126 | -0.498687977 | 3.551051084 | 0.645646553 | 0.998719404 | NA |
| ASV_16s_19153 | 0.143862386 | -0.47399323  | 3.551101847 | 0.627835514 | 0.998830879 | NA |
| ASV_16s_19154 | 0.118746438 | -0.642112844 | 3.551186461 | 0.384529417 | 0.999769158 | NA |
| ASV_16s_19155 | 0.123340941 | 0.225902199  | 3.551496753 | 0.664669883 | 0.998592715 | NA |
| ASV_16s_19156 | 0.152319068 | -0.489031794 | 3.550996936 | 0.667138165 | 0.998575687 | NA |
| ASV_16s_19157 | 0.147305373 | -0.453003077 | 3.551016529 | 0.664231577 | 0.998595724 | NA |
| ASV_16s_19158 | 0.146549089 | -0.453792336 | 3.551027076 | 0.660207758 | 0.99862315  | NA |
| ASV_16s_19159 | 0.135107465 | 0.673105841  | 3.551578019 | 0.631990382 | 0.998805482 | NA |
| ASV_16s_19160 | 0.159743235 | -0.480770064 | 3.550899847 | 0.71825531  | 0.998191506 | NA |
| ASV_16s_19161 | 0.145836513 | -0.739975064 | 3.550949561 | 0.437597662 | 0.99964442  | NA |
| ASV_16s_19162 | 0.139592113 | -0.412933315 | 3.551074231 | 0.647343997 | 0.998708423 | NA |
| ASV_16s_19163 | 0.130704952 | 0.670778474  | 3.551499936 | 0.597807804 | 0.999003743 | NA |
| ASV_16s_19164 | 0.156078622 | -0.478832077 | 3.550946638 | 0.70787662  | 0.998274482 | NA |
| ASV_16s_19165 | 0.123973645 | -0.282135144 | 3.551486839 | 0.663755224 | 0.99859899  | NA |
| ASV_16s_19166 | 0.133322266 | 0.041307032  | 3.551074945 | 0.614898581 | 0.998907635 | NA |
| ASV_16s_19167 | 0.123360692 | 0.33276863   | 3.551890338 | 0.277095288 | 0.999923566 | NA |
| ASV_16s_19168 | 0.154946823 | -0.337093772 | 3.551265347 | 0.715651782 | 0.998212564 | NA |
| ASV_16s_19169 | 0.14566649  | -0.376798428 | 3.551001423 | 0.690976223 | 0.998404115 | NA |
| ASV_16s_19170 | 0.143206124 | -0.367568169 | 3.551023856 | 0.682513995 | 0.998466513 | NA |
| ASV_16s_19171 | 0.14837487  | 0.0881197    | 3.551241215 | 0.734832954 | 0.998053547 | NA |
| ASV_16s_19172 | 0.150556144 | -0.371980989 | 3.550954941 | 0.714363643 | 0.998222923 | NA |
| ASV_16s_19173 | 0.145598083 | -0.377622243 | 3.551068117 | 0.713903628 | 0.998226612 | NA |
| ASV_16s_19174 | 0.142987233 | -0.341346398 | 3.551018818 | 0.688196503 | 0.998424795 | NA |
| ASV_16s_19175 | 0.150908453 | -0.350592285 | 3.550959338 | 0.719518451 | 0.99818123  | NA |
| ASV_16s_19176 | 0.150908453 | -0.350592285 | 3.550959338 | 0.719518451 | 0.99818123  | NA |
| ASV_16s_19177 | 0.158079006 | -0.623512865 | 3.551465438 | 0.300782924 | 0.999899076 | NA |
| ASV_16s_19178 | 0.149331732 | -0.285246179 | 3.550990229 | 0.719621539 | 0.998180389 | NA |
| ASV_16s_19179 | 0.143304206 | -0.224626148 | 3.551016864 | 0.702225715 | 0.998318577 | NA |
| ASV_16s_19180 | 0.135202947 | -0.224606529 | 3.551074406 | 0.669948491 | 0.998556134 | NA |
| ASV_16s_19181 | 0.156736455 | -0.162047899 | 3.551481559 | 0.556876441 | 0.999210427 | NA |
| ASV_16s_19182 | 0.144078574 | -0.164211107 | 3.55112759  | 0.652855905 | 0.998672331 | NA |
| ASV_16s_19183 | 0.241960299 | 0.255124461  | 3.550922412 | 1.085019007 | 0.993338053 | NA |
| ASV_16s_19184 | 0.180582737 | 0.725164893  | 3.551289139 | 0.848564904 | 0.996916168 | NA |
| ASV_16s_19185 | 0.164539739 | -0.506980125 | 3.551230415 | 0.393573008 | 0.999750463 | NA |
| ASV_16s_19186 | 0.149147762 | -0.110998279 | 3.551023048 | 0.725468407 | 0.998132305 | NA |

|               |             |              |             |             |             |    |
|---------------|-------------|--------------|-------------|-------------|-------------|----|
| ASV_16s_19187 | 0.151097523 | 0.265227181  | 3.551012105 | 0.712454109 | 0.998238204 | NA |
| ASV_16s_19188 | 0.143329532 | 0.341074173  | 3.551748615 | 0.531281896 | 0.999323687 | NA |
| ASV_16s_19189 | 0.147202226 | -0.006232595 | 3.551325525 | 0.776975001 | 0.997671892 | NA |
| ASV_16s_19190 | 0.12857857  | 0.311372438  | 3.551414928 | 0.534343881 | NA          | NA |
| ASV_16s_19191 | 0.14232812  | 0.136655638  | 3.550610891 | 0.557207748 | NA          | NA |
| ASV_16s_19192 | 0.101079173 | 0.693078603  | 3.551460677 | 0.321527853 | 0.999873558 | NA |
| ASV_16s_19193 | 0.16854633  | 1.084280831  | 3.551227862 | 0.568370286 | 0.999155641 | NA |
| ASV_16s_19194 | 0.137035104 | 0.116991507  | 3.551005583 | 0.507669269 | 0.999417912 | NA |
| ASV_16s_19195 | 0.172011221 | 0.545424059  | 3.55102517  | 0.79578001  | NA          | NA |
| ASV_16s_19196 | 0.090402966 | 0.063531015  | 3.550911252 | 0.376386695 | NA          | NA |
| ASV_16s_19197 | 0.155891203 | 1.376181262  | 3.551269085 | 0.318480426 | 0.999877559 | NA |
| ASV_16s_19198 | 0.147271295 | 1.344803767  | 3.551177169 | 0.309440378 | 0.999888911 | NA |
| ASV_16s_19199 | 0.193664923 | 0.285472689  | 3.551584184 | 0.658524575 | NA          | NA |
| ASV_16s_19200 | 0.158996447 | 1.140533287  | 3.551212503 | 0.558238198 | NA          | NA |
| ASV_16s_19201 | 0.126639957 | 1.060733834  | 3.55140038  | 0.483451281 | NA          | NA |
| ASV_16s_19202 | 0.138965587 | 1.248139385  | 3.551339134 | 0.391400292 | 0.999755046 | NA |
| ASV_16s_19203 | 0.159937548 | 1.142506333  | 3.551207511 | 0.557939407 | 0.999205465 | NA |
| ASV_16s_19204 | 0.130742195 | 1.07185305   | 3.551373648 | 0.493577027 | NA          | NA |
| ASV_16s_19205 | 0.130742195 | 1.07185305   | 3.551373648 | 0.493577027 | NA          | NA |
| ASV_16s_19206 | 0.138538455 | 1.332591141  | 3.551184522 | 0.30290992  | 0.999896641 | NA |
| ASV_16s_19207 | 0.153663378 | 0.322752644  | 3.551014342 | 0.721786511 | 0.998162682 | NA |
| ASV_16s_19208 | 0.146319554 | -0.421139417 | 3.551340585 | 0.473308019 | 0.999538466 | NA |
| ASV_16s_19209 | 0.186198698 | -0.799477515 | 3.550897991 | 0.485873727 | 0.99949658  | NA |
| ASV_16s_19210 | 0.150059722 | 0.349744851  | 3.551806595 | 0.574176627 | NA          | NA |
| ASV_16s_19211 | 0.150059722 | 0.349744851  | 3.551806595 | 0.574176627 | NA          | NA |
| ASV_16s_19212 | 0.172012408 | 0.359984219  | 3.551683706 | 0.615895139 | 0.998901846 | NA |
| ASV_16s_19213 | 0.165972486 | 0.356954425  | 3.551717219 | 0.605609034 | NA          | NA |
| ASV_16s_19214 | 0.16505914  | 0.342023222  | 3.551957337 | 0.430424989 | NA          | NA |
| ASV_16s_19215 | 0.149334201 | -0.266578098 | 3.551264164 | 0.689261839 | 0.99841689  | NA |
| ASV_16s_19216 | 0.217411197 | 0.379127197  | 3.551408445 | 0.708060589 | NA          | NA |
| ASV_16s_19217 | 0.096055849 | 0.331743518  | 3.551978889 | 0.43570955  | NA          | NA |
| ASV_16s_19218 | 0.096055849 | 0.331743518  | 3.551978889 | 0.43570955  | NA          | NA |
| ASV_16s_19219 | 0.096055849 | 0.331743518  | 3.551978889 | 0.43570955  | NA          | NA |
| ASV_16s_19220 | 0.130061763 | 0.343352089  | 3.551883203 | 0.527538692 | NA          | NA |
| ASV_16s_19221 | 0.130061763 | 0.343352089  | 3.551883203 | 0.527538692 | NA          | NA |
| ASV_16s_19222 | 0.129598696 | 0.094052993  | 3.551909355 | 0.513134064 | NA          | NA |
| ASV_16s_19223 | 0.174586301 | 0.361257427  | 3.551669834 | 0.621494564 | NA          | NA |
| ASV_16s_19224 | 0.183637055 | 0.85496334   | 3.55147423  | 0.573129166 | 0.999132225 | NA |
| ASV_16s_19225 | 0.154618888 | 0.351286782  | 3.551783677 | 0.584049779 | NA          | NA |
| ASV_16s_19226 | 0.148996906 | 0.343079309  | 3.55202624  | 0.33067795  | 0.999861002 | NA |
| ASV_16s_19227 | 0.143647838 | -0.560085061 | 3.551078607 | 0.469387505 | 0.999551031 | NA |
| ASV_16s_19228 | 0.170154841 | 0.604105617  | 3.550974593 | 0.500455789 | 0.999444811 | NA |
| ASV_16s_19229 | 0.190435461 | -0.758404644 | 3.550814386 | 0.541206595 | 0.999281175 | NA |
| ASV_16s_19230 | 0.119218202 | -0.437829754 | 3.551377272 | 0.506466816 | 0.999422456 | NA |
| ASV_16s_19231 | 0.125568969 | -0.453196136 | 3.551325265 | 0.522534964 | NA          | NA |
| ASV_16s_19232 | 0.147086338 | -0.731773195 | 3.55128809  | 0.303789682 | 0.999895622 | NA |
| ASV_16s_19233 | 0.173016832 | 1.167514498  | 3.551135053 | 0.586854813 | NA          | NA |
| ASV_16s_19234 | 0.26415346  | 1.283986494  | 3.550731062 | 0.758975076 | NA          | NA |
| ASV_16s_19235 | 0.127258256 | 1.101704695  | 3.551140726 | 0.4268921   | NA          | NA |
| ASV_16s_19236 | 0.136702017 | -0.067989212 | 3.551107762 | 0.589757708 | 0.999046971 | NA |
| ASV_16s_19237 | 0.210956423 | 0.397644697  | 3.551071099 | 0.627533096 | 0.998832714 | NA |
| ASV_16s_19238 | 0.160857749 | 0.374801087  | 3.551386494 | 0.53163878  | NA          | NA |
| ASV_16s_19239 | 0.132491979 | 0.361859702  | 3.551550383 | 0.470379266 | NA          | NA |
| ASV_16s_19240 | 0.132491979 | 0.361859702  | 3.551550383 | 0.470379266 | NA          | NA |
| ASV_16s_19241 | 0.132491979 | 0.361859702  | 3.551550383 | 0.470379266 | NA          | NA |
| ASV_16s_19242 | 0.109370565 | 0.350692401  | 3.55165424  | 0.412366339 | NA          | NA |
| ASV_16s_19243 | 0.109370565 | 0.350692401  | 3.55165424  | 0.412366339 | NA          | NA |
| ASV_16s_19244 | 0.109370565 | 0.350692401  | 3.55165424  | 0.412366339 | NA          | NA |
| ASV_16s_19245 | 0.118335074 | 0.355332781  | 3.551612013 | 0.435624266 | NA          | NA |
| ASV_16s_19246 | 0.118335074 | 0.355332781  | 3.551612013 | 0.435624266 | NA          | NA |
| ASV_16s_19247 | 0.18975108  | -0.095808417 | 3.550306248 | 0.989293403 | 0.994999405 | NA |
| ASV_16s_19248 | 0.066485579 | -0.291513353 | 3.551501333 | 0.284735979 | NA          | NA |
| ASV_16s_19249 | 0.066485579 | -0.291513353 | 3.551501333 | 0.284735979 | NA          | NA |
| ASV_16s_19250 | 0.163094781 | -0.522118851 | 3.550653199 | 0.537720256 | NA          | NA |
| ASV_16s_19251 | 0.163094781 | -0.522118851 | 3.550653199 | 0.537720256 | NA          | NA |
| ASV_16s_19252 | 0.127296664 | -0.509977153 | 3.55102368  | 0.390586071 | 0.999756748 | NA |
| ASV_16s_19253 | 0.127556688 | -0.471935293 | 3.550999514 | 0.461205563 | NA          | NA |

|               |             |              |             |             |             |    |
|---------------|-------------|--------------|-------------|-------------|-------------|----|
| ASV_16s_19254 | 0.127556688 | -0.471935293 | 3.550999514 | 0.461205563 | NA          | NA |
| ASV_16s_19255 | 0.166387868 | 1.186462166  | 3.550939453 | 0.514355034 | NA          | NA |
| ASV_16s_19256 | 0.145950461 | 1.14678735   | 3.551043074 | 0.470880921 | NA          | NA |
| ASV_16s_19257 | 0.058663524 | 0.861701656  | 3.551687838 | 0.229286251 | 0.999959873 | NA |
| ASV_16s_19258 | 0.058663524 | 0.861701656  | 3.551687838 | 0.229286251 | 0.999959873 | NA |
| ASV_16s_19259 | 0.058663524 | 0.861701656  | 3.551687838 | 0.229286251 | 0.999959873 | NA |
| ASV_16s_19260 | 0.132491979 | -0.078246958 | 3.550926717 | 0.739876841 | NA          | NA |
| ASV_16s_19261 | 0.132491979 | -0.078246958 | 3.550926717 | 0.739876841 | NA          | NA |
| ASV_16s_19262 | 0.132491979 | -0.078246958 | 3.550926717 | 0.739876841 | NA          | NA |
| ASV_16s_19263 | 0.112977418 | -0.078009602 | 3.550997413 | 0.669089588 | NA          | NA |
| ASV_16s_19264 | 0.112977418 | -0.078009602 | 3.550997413 | 0.669089588 | NA          | NA |
| ASV_16s_19265 | 0.112977418 | -0.078009602 | 3.550997413 | 0.669089588 | NA          | NA |
| ASV_16s_19266 | 0.112977418 | -0.078009602 | 3.550997413 | 0.669089588 | NA          | NA |
| ASV_16s_19267 | 0.112977418 | -0.078009602 | 3.550997413 | 0.669089588 | NA          | NA |
| ASV_16s_19268 | 0.112977418 | -0.078009602 | 3.550997413 | 0.669089588 | NA          | NA |
| ASV_16s_19269 | 0.12746859  | -0.078192725 | 3.550942861 | 0.722400979 | NA          | NA |
| ASV_16s_19270 | 0.12746859  | -0.078192725 | 3.550942861 | 0.722400979 | NA          | NA |
| ASV_16s_19271 | 0.12746859  | -0.078192725 | 3.550942861 | 0.722400979 | NA          | NA |
| ASV_16s_19272 | 0.074043068 | 0.220228361  | 3.550967046 | 0.342763057 | NA          | NA |
| ASV_16s_19273 | 0.07863799  | 0.220211174  | 3.550944368 | 0.364593853 | 0.999806921 | NA |
| ASV_16s_19274 | 0.07863799  | 0.220211174  | 3.550944368 | 0.364593853 | 0.999806921 | NA |
| ASV_16s_19275 | 0.084107781 | 0.220193158  | 3.550920575 | 0.389757611 | NA          | NA |
| ASV_16s_19276 | 0.083939824 | 0.220193677  | 3.550921259 | 0.388999485 | NA          | NA |
| ASV_16s_19277 | 0.083939824 | 0.220193677  | 3.550921259 | 0.388999485 | NA          | NA |
| ASV_16s_19278 | 0.138542553 | 0.310951588  | 3.551059691 | 0.740418184 | 0.998005543 | NA |
| ASV_16s_19279 | 0.143095043 | 0.310950623  | 3.551044777 | 0.755415098 | NA          | NA |
| ASV_16s_19280 | 0.08860091  | 0.595666506  | 3.550859747 | 0.355456321 | NA          | NA |
| ASV_16s_19281 | 0.128390095 | 0.68727077   | 3.551070361 | 0.646124783 | NA          | NA |
| ASV_16s_19282 | 0.138318439 | 0.493898022  | 3.551857095 | 0.558361339 | NA          | NA |
| ASV_16s_19283 | 0.115950528 | -0.065418804 | 3.551052338 | 0.712995075 | NA          | NA |
| ASV_16s_19284 | 0.152615915 | 1.360913836  | 3.551304328 | 0.337582622 | 0.999850974 | NA |
| ASV_16s_19285 | 0.197345037 | -0.24485609  | 3.550911284 | 0.653484058 | 0.998668176 | NA |
| ASV_16s_19286 | 0.117437083 | -0.067059313 | 3.551096206 | 0.745233397 | 0.997963533 | NA |
| ASV_16s_19287 | 0.132324319 | 1.283860829  | 3.551231484 | 0.267983033 | 0.999931768 | NA |
| ASV_16s_19288 | 0.110996909 | 1.093281348  | 3.551599767 | 0.37663651  | 0.999784666 | NA |
| ASV_16s_19289 | 0.118428119 | -0.066351615 | 3.551137711 | 0.759158805 | 0.997838757 | NA |
| ASV_16s_19290 | 0.121533337 | -0.066458514 | 3.551103901 | 0.771146083 | 0.997727388 | NA |
| ASV_16s_19291 | 0.139674499 | 0.298011157  | 3.550875899 | 0.820628366 | 0.997227691 | NA |
| ASV_16s_19292 | 0.118526634 | 0.304599362  | 3.551975536 | 0.317022469 | 0.999879442 | NA |
| ASV_16s_19293 | 0.129470525 | -0.064571994 | 3.55110781  | 0.810516664 | 0.99733514  | NA |
| ASV_16s_19294 | 0.132491979 | 0.273913671  | 3.550710574 | 0.754046978 | 0.997885131 | NA |
| ASV_16s_19295 | 0.128394084 | -0.063693933 | 3.551119725 | 0.80563926  | 0.997385976 | NA |
| ASV_16s_19296 | 0.153277169 | 0.727881708  | 3.551572617 | 0.751306195 | 0.997909722 | NA |
| ASV_16s_19297 | 0.210473519 | 0.29240695   | 3.551885714 | 0.45118179  | 0.99960633  | NA |
| ASV_16s_19298 | 0.120905711 | -0.052630443 | 3.55126215  | 0.770358778 | 0.997734816 | NA |
| ASV_16s_19299 | 0.225619016 | 0.18039298   | 3.550755708 | 0.940743744 | 0.995728635 | NA |
| ASV_16s_19300 | 0.115809118 | -0.095099158 | 3.551545448 | 0.673628727 | 0.998530258 | NA |
| ASV_16s_19301 | 0.130763574 | 0.706172403  | 3.551534876 | 0.715452803 | 0.998214167 | NA |
| ASV_16s_19302 | 0.138138389 | 0.318392742  | 3.551249993 | 0.62662171  | 0.99883823  | NA |
| ASV_16s_19303 | 0.16466728  | -0.344911191 | 3.551118718 | 0.608235865 | 0.998945811 | NA |
| ASV_16s_19304 | 0.087357422 | 0.190466469  | 3.551817997 | 0.373466961 | 0.999790686 | NA |
| ASV_16s_19305 | 0.149193424 | 0.348834234  | 3.551626504 | 0.588839426 | 0.99905182  | NA |
| ASV_16s_19306 | 0.211107101 | -0.642926421 | 3.550704294 | 0.709188681 | NA          | NA |
| ASV_16s_19307 | 0.211107101 | -0.642926421 | 3.550704294 | 0.709188681 | NA          | NA |
| ASV_16s_19308 | 0.187356778 | 1.116478983  | 3.551114259 | 0.606934487 | NA          | NA |
| ASV_16s_19309 | 0.187356778 | 1.116478983  | 3.551114259 | 0.606934487 | NA          | NA |
| ASV_16s_19310 | 0.203783348 | 1.049505848  | 3.551091061 | 0.620368475 | 0.998875609 | NA |
| ASV_16s_19311 | 0.141443232 | 0.945979112  | 3.55144117  | 0.497347007 | NA          | NA |
| ASV_16s_19312 | 0.068678416 | 0.287949971  | 3.551855213 | 0.348236065 | 0.999834536 | NA |
| ASV_16s_19313 | 0.068678416 | 0.287949971  | 3.551855213 | 0.348236065 | 0.999834536 | NA |
| ASV_16s_19314 | 0.079311469 | 0.286695709  | 3.551813188 | 0.385956201 | 0.999766275 | NA |
| ASV_16s_19315 | 0.159531446 | 0.279927248  | 3.551626224 | 0.606242211 | NA          | NA |
| ASV_16s_19316 | 0.22566436  | -0.558879707 | 3.551031266 | 0.724896287 | NA          | NA |
| ASV_16s_19317 | 0.036574096 | -0.095758591 | 3.551831835 | 0.21736044  | 0.999966561 | NA |
| ASV_16s_19318 | 0.299365983 | 1.14342615   | 3.550718726 | 0.808807858 | NA          | NA |
| ASV_16s_19319 | 0.221669394 | 0.057072134  | 3.551029478 | 0.979940785 | 0.995145661 | NA |
| ASV_16s_19320 | 0.17285139  | -0.143336633 | 3.551195061 | 0.803061377 | 0.997412585 | NA |

|               |             |              |             |             |             |    |
|---------------|-------------|--------------|-------------|-------------|-------------|----|
| ASV_16s_19321 | 0.145945116 | 0.538223973  | 3.551129527 | 0.67672281  | NA          | NA |
| ASV_16s_19322 | 0.166387868 | 1.186462166  | 3.550939453 | 0.514355034 | NA          | NA |
| ASV_16s_19323 | 0.166387868 | 1.186462166  | 3.550939453 | 0.514355034 | NA          | NA |
| ASV_16s_19324 | 0.154282194 | 1.111810735  | 3.550991067 | 0.586410958 | 0.999064564 | NA |
| ASV_16s_19325 | 0.09481323  | -0.077702104 | 3.551089126 | 0.595659572 | NA          | NA |
| ASV_16s_19326 | 0.09481323  | -0.077702104 | 3.551089126 | 0.595659572 | NA          | NA |
| ASV_16s_19327 | 0.09481323  | -0.077702104 | 3.551089126 | 0.595659572 | NA          | NA |
| ASV_16s_19328 | 0.09481323  | -0.077702104 | 3.551089126 | 0.595659572 | NA          | NA |
| ASV_16s_19329 | 0.09481323  | -0.077702104 | 3.551089126 | 0.595659572 | NA          | NA |
| ASV_16s_19330 | 0.154313372 | 0.111814469  | 3.550912081 | 0.923266627 | 0.995973239 | NA |
| ASV_16s_19331 | 0.262374091 | -0.029055244 | 3.550829363 | 1.165744611 | NA          | NA |
| ASV_16s_19332 | 0.209286178 | -0.028819011 | 3.550907592 | 1.018037055 | NA          | NA |
| ASV_16s_19333 | 0.209286178 | -0.028819011 | 3.550907592 | 1.018037055 | NA          | NA |
| ASV_16s_19334 | 0.198571424 | 0.371274594  | 3.55061606  | 1.037345163 | 0.994203402 | NA |
| ASV_16s_19335 | 0.172875158 | 0.408108735  | 3.550853043 | 0.902779436 | NA          | NA |
| ASV_16s_19336 | 0.183880647 | 0.595701431  | 3.551083253 | 1.084220285 | 0.993353185 | NA |
| ASV_16s_19337 | 0.125092768 | -0.028042159 | 3.551166385 | 0.772987101 | NA          | NA |
| ASV_16s_19338 | 0.125092768 | -0.028042159 | 3.551166385 | 0.772987101 | NA          | NA |
| ASV_16s_19339 | 0.125092768 | -0.028042159 | 3.551166385 | 0.772987101 | NA          | NA |
| ASV_16s_19340 | 0.125092768 | -0.028042159 | 3.551166385 | 0.772987101 | NA          | NA |
| ASV_16s_19341 | 0.131229268 | 0.303848153  | 3.551140851 | 0.805125073 | 0.997391298 | NA |
| ASV_16s_19342 | 0.142934407 | -0.073209361 | 3.550934754 | 0.79886519  | NA          | NA |
| ASV_16s_19343 | 0.136191086 | -0.07313633  | 3.550955469 | 0.776606208 | 0.997675429 | NA |
| ASV_16s_19344 | 0.104393517 | -0.07266837  | 3.55108884  | 0.659441259 | NA          | NA |
| ASV_16s_19345 | 0.104393517 | -0.07266837  | 3.55108884  | 0.659441259 | NA          | NA |
| ASV_16s_19346 | 0.10251774  | -0.072631732 | 3.551099267 | 0.651865926 | NA          | NA |
| ASV_16s_19347 | 0.10251774  | -0.072631732 | 3.551099267 | 0.651865926 | NA          | NA |
| ASV_16s_19348 | 0.10251774  | -0.072631732 | 3.551099267 | 0.651865926 | NA          | NA |
| ASV_16s_19349 | 0.10251774  | -0.072631732 | 3.551099267 | 0.651865926 | NA          | NA |
| ASV_16s_19350 | 0.10251774  | -0.072631732 | 3.551099267 | 0.651865926 | NA          | NA |
| ASV_16s_19351 | 0.10251774  | -0.072631732 | 3.551099267 | 0.651865926 | NA          | NA |
| ASV_16s_19352 | 0.10251774  | -0.072631732 | 3.551099267 | 0.651865926 | NA          | NA |
| ASV_16s_19353 | 0.10251774  | -0.072631732 | 3.551099267 | 0.651865926 | NA          | NA |
| ASV_16s_19354 | 0.133697541 | 0.316323034  | 3.551005004 | 0.821537453 | 0.997217894 | NA |
| ASV_16s_19355 | 0.146689124 | 0.370076441  | 3.551075633 | 0.844297416 | 0.996965165 | NA |
| ASV_16s_19356 | 0.189596752 | 0.688019992  | 3.550539383 | 0.778906629 | 0.997653306 | NA |
| ASV_16s_19357 | 0.12719999  | -0.073027096 | 3.550986469 | 0.745606443 | NA          | NA |
| ASV_16s_19358 | 0.12719999  | -0.073027096 | 3.550986469 | 0.745606443 | NA          | NA |
| ASV_16s_19359 | 0.12719999  | -0.073027096 | 3.550986469 | 0.745606443 | NA          | NA |
| ASV_16s_19360 | 0.142696131 | 0.360258031  | 3.551303391 | 0.815762157 | NA          | NA |
| ASV_16s_19361 | 0.142696131 | 0.360258031  | 3.551303391 | 0.815762157 | NA          | NA |
| ASV_16s_19362 | 0.142696131 | 0.360258031  | 3.551303391 | 0.815762157 | NA          | NA |
| ASV_16s_19363 | 0.194346764 | 0.348555502  | 3.55137051  | 0.704554498 | 0.998300497 | NA |
| ASV_16s_19364 | 0.170082892 | 0.691583679  | 3.551177204 | 0.967166362 | 0.995340942 | NA |
| ASV_16s_19365 | 0.126851931 | 0.360231367  | 3.55139094  | 0.762250173 | NA          | NA |
| ASV_16s_19366 | 0.126851931 | 0.360231367  | 3.55139094  | 0.762250173 | NA          | NA |
| ASV_16s_19367 | 0.126851931 | 0.360231367  | 3.55139094  | 0.762250173 | NA          | NA |
| ASV_16s_19368 | 0.126851931 | 0.360231367  | 3.55139094  | 0.762250173 | NA          | NA |
| ASV_16s_19369 | 0.126851931 | 0.360231367  | 3.55139094  | 0.762250173 | NA          | NA |
| ASV_16s_19370 | 0.126851931 | 0.360231367  | 3.55139094  | 0.762250173 | NA          | NA |
| ASV_16s_19371 | 0.126851931 | 0.360231367  | 3.55139094  | 0.762250173 | NA          | NA |
| ASV_16s_19372 | 0.126851931 | 0.360231367  | 3.55139094  | 0.762250173 | NA          | NA |
| ASV_16s_19373 | 0.126851931 | 0.360231367  | 3.55139094  | 0.762250173 | NA          | NA |
| ASV_16s_19374 | 0.126851931 | 0.360231367  | 3.55139094  | 0.762250173 | NA          | NA |
| ASV_16s_19375 | 0.126851931 | 0.360231367  | 3.55139094  | 0.762250173 | NA          | NA |
| ASV_16s_19376 | 0.111125607 | 0.46915972   | 3.551421695 | 0.927211853 | 0.995918837 | NA |
| ASV_16s_19377 | 0.164361359 | 0.315939869  | 3.551023428 | 0.84203925  | NA          | NA |
| ASV_16s_19378 | 0.165292834 | 0.315939739  | 3.551021022 | 0.841940042 | 0.996992011 | NA |
| ASV_16s_19379 | 0.16214724  | 0.315939749  | 3.551029376 | 0.832679636 | 0.997095967 | NA |
| ASV_16s_19380 | 0.152421411 | 0.315939918  | 3.551057351 | 0.805470969 | 0.997387719 | NA |
| ASV_16s_19381 | 0.16564241  | 0.315939738  | 3.551020108 | 0.843323115 | 0.996976279 | NA |
| ASV_16s_19382 | 0.148553034 | 0.315939798  | 3.551069498 | 0.793751058 | 0.997507204 | NA |
| ASV_16s_19383 | 0.142073456 | 0.315939967  | 3.551091313 | 0.774892879 | NA          | NA |
| ASV_16s_19384 | 0.142073456 | 0.315939967  | 3.551091313 | 0.774892879 | NA          | NA |
| ASV_16s_19385 | 0.142073456 | 0.315939967  | 3.551091313 | 0.774892879 | NA          | NA |
| ASV_16s_19386 | 0.135229544 | 0.356379821  | 3.551091774 | 0.863293298 | 0.9967431   | NA |
| ASV_16s_19387 | 0.135229544 | 0.315940005  | 3.551116613 | 0.752211417 | 0.997901621 | NA |

|               |             |             |             |             |             |    |
|---------------|-------------|-------------|-------------|-------------|-------------|----|
| ASV_16s_19388 | 0.156906511 | 0.315939767 | 3.551044071 | 0.816346891 | 0.997273527 | NA |
| ASV_16s_19389 | 0.132491979 | 0.315940021 | 3.551127456 | 0.742936875 | NA          | NA |
| ASV_16s_19390 | 0.132491979 | 0.315940021 | 3.551127456 | 0.742936875 | NA          | NA |
| ASV_16s_19391 | 0.132491979 | 0.315940021 | 3.551127456 | 0.742936875 | NA          | NA |
| ASV_16s_19392 | 0.132491979 | 0.315940021 | 3.551127456 | 0.742936875 | NA          | NA |
| ASV_16s_19393 | 0.132491979 | 0.315940021 | 3.551127456 | 0.742936875 | NA          | NA |
| ASV_16s_19394 | 0.132491979 | 0.315940021 | 3.551127456 | 0.742936875 | NA          | NA |
| ASV_16s_19395 | 0.132491979 | 0.315940021 | 3.551127456 | 0.742936875 | NA          | NA |
| ASV_16s_19396 | 0.132491979 | 0.315940021 | 3.551127456 | 0.742936875 | NA          | NA |
| ASV_16s_19397 | 0.132491979 | 0.315940021 | 3.551127456 | 0.742936875 | NA          | NA |
| ASV_16s_19398 | 0.14502159  | 0.315939953 | 3.55108123  | 0.779954781 | 0.99764318  | NA |
| ASV_16s_19399 | 0.249435018 | 0.315939664 | 3.550875324 | 1.084851333 | NA          | NA |
| ASV_16s_19400 | 0.126177018 | 0.68724278  | 3.551079336 | 0.638636226 | NA          | NA |
| ASV_16s_19401 | 0.126177018 | 0.68724278  | 3.551079336 | 0.638636226 | NA          | NA |
| ASV_16s_19402 | 0.126177018 | 0.68724278  | 3.551079336 | 0.638636226 | NA          | NA |
| ASV_16s_19403 | 0.189939263 | 1.031406443 | 3.55097882  | 0.670077826 | 0.99855523  | NA |
| ASV_16s_19404 | 0.207124071 | 0.733819083 | 3.55109446  | 0.931128494 | NA          | NA |
| ASV_16s_19405 | 0.175138888 | 1.066352899 | 3.551231137 | 0.64589456  | 0.998717803 | NA |
| ASV_16s_19406 | 0.236540092 | 0.734039674 | 3.551030403 | 1.006139955 | 0.994728881 | NA |
| ASV_16s_19407 | 0.170834021 | 0.954229801 | 3.551054504 | 0.654035522 | NA          | NA |
| ASV_16s_19408 | 0.175270608 | 0.733498889 | 3.55118785  | 0.852707463 | NA          | NA |
| ASV_16s_19409 | 0.175270608 | 0.733498889 | 3.55118785  | 0.852707463 | NA          | NA |
| ASV_16s_19410 | 0.175270608 | 0.733498889 | 3.55118785  | 0.852707463 | NA          | NA |
| ASV_16s_19411 | 0.175270608 | 0.733498889 | 3.55118785  | 0.852707463 | NA          | NA |
| ASV_16s_19412 | 0.175270608 | 0.733498889 | 3.55118785  | 0.852707463 | NA          | NA |
| ASV_16s_19413 | 0.175270608 | 0.733498889 | 3.55118785  | 0.852707463 | NA          | NA |
| ASV_16s_19414 | 0.175270608 | 0.733498889 | 3.55118785  | 0.852707463 | NA          | NA |
| ASV_16s_19415 | 0.175270608 | 0.733498889 | 3.55118785  | 0.852707463 | NA          | NA |
| ASV_16s_19416 | 0.175270608 | 0.733498889 | 3.55118785  | 0.852707463 | NA          | NA |
| ASV_16s_19417 | 0.175270608 | 0.733498889 | 3.55118785  | 0.852707463 | NA          | NA |
| ASV_16s_19418 | 0.175270608 | 0.733498889 | 3.55118785  | 0.852707463 | NA          | NA |
| ASV_16s_19419 | 0.175270608 | 0.733498889 | 3.55118785  | 0.852707463 | NA          | NA |
| ASV_16s_19420 | 0.175270608 | 0.733498889 | 3.55118785  | 0.852707463 | NA          | NA |
| ASV_16s_19421 | 0.086821288 | 0.694458712 | 3.55161832  | 0.552833627 | NA          | NA |
| ASV_16s_19422 | 0.086821288 | 0.694458712 | 3.55161832  | 0.552833627 | NA          | NA |
| ASV_16s_19423 | 0.086821288 | 0.694458712 | 3.55161832  | 0.552833627 | NA          | NA |
| ASV_16s_19424 | 0.086821288 | 0.694458712 | 3.55161832  | 0.552833627 | NA          | NA |
| ASV_16s_19425 | 0.086821288 | 0.694458712 | 3.55161832  | 0.552833627 | NA          | NA |
| ASV_16s_19426 | 0.086821288 | 0.694458712 | 3.55161832  | 0.552833627 | NA          | NA |
| ASV_16s_19427 | 0.086821288 | 0.694458712 | 3.55161832  | 0.552833627 | NA          | NA |
| ASV_16s_19428 | 0.086821288 | 0.694458712 | 3.55161832  | 0.552833627 | NA          | NA |
| ASV_16s_19429 | 0.086821288 | 0.694458712 | 3.55161832  | 0.552833627 | NA          | NA |
| ASV_16s_19430 | 0.086821288 | 0.694458712 | 3.55161832  | 0.552833627 | NA          | NA |
| ASV_16s_19431 | 0.148806033 | 0.69248239  | 3.551049393 | 0.734773888 | 0.998054051 | NA |
| ASV_16s_19432 | 0.165256615 | 0.692649353 | 3.551000255 | 0.784472781 | 0.997599203 | NA |
| ASV_16s_19433 | 0.165256615 | 0.692649353 | 3.551000255 | 0.784472781 | 0.997599203 | NA |
| ASV_16s_19434 | 0.16756835  | 0.692670214 | 3.550994119 | 0.790971754 | NA          | NA |
| ASV_16s_19435 | 0.16756835  | 0.692670214 | 3.550994119 | 0.790971754 | NA          | NA |
| ASV_16s_19436 | 0.16756835  | 0.692670214 | 3.550994119 | 0.790971754 | NA          | NA |
| ASV_16s_19437 | 0.16756835  | 0.692670214 | 3.550994119 | 0.790971754 | NA          | NA |
| ASV_16s_19438 | 0.16756835  | 0.692670214 | 3.550994119 | 0.790971754 | NA          | NA |
| ASV_16s_19439 | 0.16756835  | 0.692670214 | 3.550994119 | 0.790971754 | NA          | NA |
| ASV_16s_19440 | 0.16756835  | 0.692670214 | 3.550994119 | 0.790971754 | NA          | NA |
| ASV_16s_19441 | 0.16756835  | 0.692670214 | 3.550994119 | 0.790971754 | NA          | NA |
| ASV_16s_19442 | 0.159156357 | 0.692591365 | 3.551017316 | 0.764245948 | 0.997791946 | NA |
| ASV_16s_19443 | 0.181103035 | 0.692781755 | 3.550961323 | 0.825030361 | 0.99718004  | NA |
| ASV_16s_19444 | 0.148777437 | 0.692482052 | 3.551049492 | 0.733609207 | 0.998063962 | NA |
| ASV_16s_19445 | 0.154204003 | 0.692540953 | 3.551032152 | 0.74772846  | 0.997941537 | NA |
| ASV_16s_19446 | 0.132491979 | 0.692277849 | 3.551110033 | 0.684398758 | NA          | NA |
| ASV_16s_19447 | 0.132491979 | 0.692277849 | 3.551110033 | 0.684398758 | NA          | NA |
| ASV_16s_19448 | 0.132491979 | 0.692277849 | 3.551110033 | 0.684398758 | NA          | NA |
| ASV_16s_19449 | 0.132491979 | 0.692277849 | 3.551110033 | 0.684398758 | NA          | NA |
| ASV_16s_19450 | 0.132491979 | 0.692277849 | 3.551110033 | 0.684398758 | NA          | NA |
| ASV_16s_19451 | 0.132491979 | 0.692277849 | 3.551110033 | 0.684398758 | NA          | NA |
| ASV_16s_19452 | 0.132491979 | 0.692277849 | 3.551110033 | 0.684398758 | NA          | NA |
| ASV_16s_19453 | 0.132491979 | 0.692277849 | 3.551110033 | 0.684398758 | NA          | NA |
| ASV_16s_19454 | 0.132491979 | 0.692277849 | 3.551110033 | 0.684398758 | NA          | NA |



|               |             |              |             |             |             |    |
|---------------|-------------|--------------|-------------|-------------|-------------|----|
| ASV_16s_19455 | 0.132491979 | 0.692277849  | 3.551110033 | 0.684398758 | NA          | NA |
| ASV_16s_19456 | 0.132491979 | 0.692277849  | 3.551110033 | 0.684398758 | NA          | NA |
| ASV_16s_19457 | 0.150147277 | 0.692497239  | 3.551045021 | 0.735261303 | 0.998049893 | NA |
| ASV_16s_19458 | 0.154561102 | 0.692544658  | 3.551031062 | 0.748010782 | 0.997939038 | NA |
| ASV_16s_19459 | 0.163388751 | 0.69263192   | 3.551005383 | 0.773394389 | 0.997706087 | NA |
| ASV_16s_19460 | 0.16578434  | 0.692654019  | 3.550998882 | 0.780212695 | 0.997640684 | NA |
| ASV_16s_19461 | 0.19463772  | 0.692877994  | 3.550933048 | 0.859511574 | NA          | NA |
| ASV_16s_19462 | 0.19463772  | 0.692877994  | 3.550933048 | 0.859511574 | NA          | NA |
| ASV_16s_19463 | 0.194285522 | 0.692875658  | 3.550933734 | 0.858645444 | NA          | NA |
| ASV_16s_19464 | 0.110149783 | 0.29683243   | 3.551896778 | 0.475120617 | NA          | NA |
| ASV_16s_19465 | 0.110149783 | 0.29683243   | 3.551896778 | 0.475120617 | NA          | NA |
| ASV_16s_19466 | 0.110149783 | 0.29683243   | 3.551896778 | 0.475120617 | NA          | NA |
| ASV_16s_19467 | 0.110149783 | 0.29683243   | 3.551896778 | 0.475120617 | NA          | NA |
| ASV_16s_19468 | 0.110149783 | 0.29683243   | 3.551896778 | 0.475120617 | NA          | NA |
| ASV_16s_19469 | 0.110149783 | 0.29683243   | 3.551896778 | 0.475120617 | NA          | NA |
| ASV_16s_19470 | 0.110149783 | 0.29683243   | 3.551896778 | 0.475120617 | NA          | NA |
| ASV_16s_19471 | 0.110149783 | 0.29683243   | 3.551896778 | 0.475120617 | NA          | NA |
| ASV_16s_19472 | 0.110149783 | 0.29683243   | 3.551896778 | 0.475120617 | NA          | NA |
| ASV_16s_19473 | 0.110149783 | 0.29683243   | 3.551896778 | 0.475120617 | NA          | NA |
| ASV_16s_19474 | 0.110149783 | 0.29683243   | 3.551896778 | 0.475120617 | NA          | NA |
| ASV_16s_19475 | 0.110149783 | 0.29683243   | 3.551896778 | 0.475120617 | NA          | NA |
| ASV_16s_19476 | 0.110149783 | 0.29683243   | 3.551896778 | 0.475120617 | NA          | NA |
| ASV_16s_19477 | 0.110149783 | 0.29683243   | 3.551896778 | 0.475120617 | NA          | NA |
| ASV_16s_19478 | 0.110149783 | 0.29683243   | 3.551896778 | 0.475120617 | NA          | NA |
| ASV_16s_19479 | 0.110149783 | 0.29683243   | 3.551896778 | 0.475120617 | NA          | NA |
| ASV_16s_19480 | 0.110149783 | 0.29683243   | 3.551896778 | 0.475120617 | NA          | NA |
| ASV_16s_19481 | 0.110149783 | 0.29683243   | 3.551896778 | 0.475120617 | NA          | NA |
| ASV_16s_19482 | 0.110149783 | 0.29683243   | 3.551896778 | 0.475120617 | NA          | NA |
| ASV_16s_19483 | 0.110184007 | 0.080587774  | 3.551704145 | 0.636281806 | 0.998778864 | NA |
| ASV_16s_19484 | 0.110184007 | 0.080587774  | 3.551704145 | 0.636281806 | 0.998778864 | NA |
| ASV_16s_19485 | 0.111703296 | 0.069794035  | 3.55168305  | 0.644035299 | 0.998729769 | NA |
| ASV_16s_19486 | 0.121003642 | -0.017064733 | 3.551529931 | 0.708583746 | 0.99826891  | NA |
| ASV_16s_19487 | 0.111720408 | -0.01627452  | 3.551587227 | 0.683937422 | 0.998456133 | NA |
| ASV_16s_19488 | 0.112738971 | -0.048510971 | 3.551548469 | 0.697535049 | 0.998354605 | NA |
| ASV_16s_19489 | 0.110212527 | -0.060432868 | 3.551552881 | 0.692975419 | 0.99838913  | NA |
| ASV_16s_19490 | 0.11299789  | -0.075248611 | 3.551522333 | 0.705441567 | 0.998293576 | NA |
| ASV_16s_19491 | 0.11299789  | -0.075248611 | 3.551522333 | 0.705441567 | 0.998293576 | NA |
| ASV_16s_19492 | 0.112238245 | -0.071268466 | 3.551530477 | 0.702009718 | 0.998320247 | NA |
| ASV_16s_19493 | 0.110212527 | -0.060432868 | 3.551552881 | 0.692975419 | 0.99838913  | NA |
| ASV_16s_19494 | 0.110218231 | -0.085826175 | 3.551530404 | 0.697879187 | 0.998351979 | NA |
| ASV_16s_19495 | 0.113256809 | -0.101512217 | 3.551495228 | 0.710992905 | 0.998249839 | NA |
| ASV_16s_19496 | 0.110218231 | -0.085826175 | 3.551530404 | 0.697879187 | 0.998351979 | NA |
| ASV_16s_19497 | 0.113256809 | -0.101512217 | 3.551495228 | 0.710992905 | 0.998249839 | NA |
| ASV_16s_19498 | 0.12670349  | -0.183189703 | 3.551310963 | 0.771490457 | 0.997724133 | NA |
| ASV_16s_19499 | 0.113515727 | -0.12707247  | 3.551470951 | 0.714079775 | 0.9982252   | NA |
| ASV_16s_19500 | 0.113774646 | -0.152013422 | 3.551449409 | 0.714962541 | 0.998218111 | NA |
| ASV_16s_19501 | 0.113774646 | -0.152013422 | 3.551449409 | 0.714962541 | 0.998218111 | NA |
| ASV_16s_19502 | 0.127327086 | -0.206951976 | 3.551288923 | 0.771530455 | 0.997723755 | NA |
| ASV_16s_19503 | 0.113774646 | -0.152013422 | 3.551449409 | 0.714962541 | 0.998218111 | NA |
| ASV_16s_19504 | 0.113774646 | -0.152013422 | 3.551449409 | 0.714962541 | 0.998218111 | NA |
| ASV_16s_19505 | 0.110235343 | -0.159306511 | 3.551468534 | 0.699178446 | 0.998342041 | NA |
| ASV_16s_19506 | 0.114033565 | -0.176396438 | 3.551430106 | 0.713600061 | 0.998229044 | NA |
| ASV_16s_19507 | 0.114292484 | -0.200509631 | 3.551411173 | 0.709942418 | 0.998258172 | NA |
| ASV_16s_19508 | 0.114292484 | -0.200509631 | 3.551411173 | 0.709942418 | 0.998258172 | NA |
| ASV_16s_19509 | 0.127338494 | -0.249488276 | 3.5512641   | 0.759527979 | 0.997835383 | NA |
| ASV_16s_19510 | 0.110246752 | -0.206211183 | 3.551437604 | 0.689172237 | 0.998417556 | NA |
| ASV_16s_19511 | 0.110246752 | -0.206211183 | 3.551437604 | 0.689172237 | 0.998417556 | NA |
| ASV_16s_19512 | 0.110246752 | -0.206211183 | 3.551437604 | 0.689172237 | 0.998417556 | NA |
| ASV_16s_19513 | 0.112024959 | -0.236810069 | 3.551403489 | 0.686962663 | 0.998433916 | NA |
| ASV_16s_19514 | 0.112784603 | -0.239976831 | 3.55139563  | 0.689437551 | 0.998415584 | NA |
| ASV_16s_19515 | 0.123077954 | -0.32229651  | 3.551271848 | 0.697170669 | 0.998357382 | NA |
| ASV_16s_19516 | 0.110269568 | -0.298694619 | 3.551378859 | 0.64525436  | 0.998721932 | NA |
| ASV_16s_19517 | 0.039377221 | -0.123372733 | 3.551862372 | 0.237974818 | 0.999954447 | NA |
| ASV_16s_19518 | 0.039377221 | -0.123372733 | 3.551862372 | 0.237974818 | 0.999954447 | NA |
| ASV_16s_19519 | 0.039377221 | -0.123372733 | 3.551862372 | 0.237974818 | 0.999954447 | NA |
| ASV_16s_19520 | 0.180266248 | -0.201593085 | 3.550253901 | 0.630102093 | 0.99881707  | NA |
| ASV_16s_19521 | 0.150279024 | -0.548014005 | 3.551057952 | 0.591548602 | NA          | NA |

|               |             |              |             |             |             |    |
|---------------|-------------|--------------|-------------|-------------|-------------|----|
| ASV_16s_19522 | 0.150279024 | -0.548014005 | 3.551057952 | 0.591548602 | NA          | NA |
| ASV_16s_19523 | 0.154305642 | -0.32786229  | 3.550869061 | 0.375625916 | NA          | NA |
| ASV_16s_19524 | 0.14877479  | -0.544881739 | 3.551068179 | 0.586400886 | 0.999064616 | NA |
| ASV_16s_19525 | 0.14239705  | -0.531164107 | 3.551112792 | 0.57282168  | 0.999133751 | NA |
| ASV_16s_19526 | 0.141469759 | -0.528908552 | 3.551118465 | 0.570841028 | 0.999143538 | NA |
| ASV_16s_19527 | 0.154980492 | -0.557606468 | 3.55102703  | 0.600108005 | NA          | NA |
| ASV_16s_19528 | 0.147327204 | -0.541840134 | 3.551078171 | 0.582751557 | 0.999083548 | NA |
| ASV_16s_19529 | 0.146051656 | -0.539138507 | 3.551087098 | 0.580058195 | 0.999097354 | NA |
| ASV_16s_19530 | 0.145413882 | -0.537779483 | 3.551091606 | 0.578724063 | 0.99910414  | NA |
| ASV_16s_19531 | 0.142862786 | -0.532275797 | 3.551109892 | 0.573462756 | 0.999130568 | NA |
| ASV_16s_19532 | 0.137760594 | -0.519748864 | 3.55114174  | 0.563145492 | NA          | NA |
| ASV_16s_19533 | 0.137760594 | -0.519748864 | 3.55114174  | 0.563145492 | NA          | NA |
| ASV_16s_19534 | 0.152014668 | -0.551587999 | 3.551046362 | 0.594679122 | NA          | NA |
| ASV_16s_19535 | 0.117140591 | -0.464405307 | 3.551286551 | 0.510663006 | NA          | NA |
| ASV_16s_19536 | 0.117140591 | -0.464405307 | 3.551286551 | 0.510663006 | NA          | NA |
| ASV_16s_19537 | 0.117140591 | -0.464405307 | 3.551286551 | 0.510663006 | NA          | NA |
| ASV_16s_19538 | 0.117140591 | -0.464405307 | 3.551286551 | 0.510663006 | NA          | NA |
| ASV_16s_19539 | 0.117140591 | -0.464405307 | 3.551286551 | 0.510663006 | NA          | NA |
| ASV_16s_19540 | 0.114355229 | -0.456206858 | 3.551309036 | 0.503088442 | 0.999435094 | NA |
| ASV_16s_19541 | 0.114102014 | -0.45545255  | 3.551311122 | 0.502395953 | 0.999437661 | NA |
| ASV_16s_19542 | 0.114102014 | -0.45545255  | 3.551311122 | 0.502395953 | 0.999437661 | NA |
| ASV_16s_19543 | 0.14163215  | -0.52924499  | 3.551117617 | 0.565247348 | 0.999170773 | NA |
| ASV_16s_19544 | 0.11283594  | -0.45165814  | 3.551321657 | 0.498917162 | 0.999450437 | NA |
| ASV_16s_19545 | 0.11232951  | -0.450129583 | 3.551325921 | 0.497518042 | 0.999455519 | NA |
| ASV_16s_19546 | 0.110303792 | -0.443952393 | 3.551343276 | 0.491877187 | NA          | NA |
| ASV_16s_19547 | 0.110303792 | -0.443952393 | 3.551343276 | 0.491877187 | NA          | NA |
| ASV_16s_19548 | 0.110303792 | -0.443952393 | 3.551343276 | 0.491877187 | NA          | NA |
| ASV_16s_19549 | 0.110303792 | -0.443952393 | 3.551343276 | 0.491877187 | NA          | NA |
| ASV_16s_19550 | 0.110303792 | -0.443952393 | 3.551343276 | 0.491877187 | NA          | NA |
| ASV_16s_19551 | 0.110303792 | -0.443952393 | 3.551343276 | 0.491877187 | NA          | NA |
| ASV_16s_19552 | 0.110303792 | -0.443952393 | 3.551343276 | 0.491877187 | NA          | NA |
| ASV_16s_19553 | 0.110303792 | -0.443952393 | 3.551343276 | 0.491877187 | NA          | NA |
| ASV_16s_19554 | 0.110303792 | -0.443952393 | 3.551343276 | 0.491877187 | NA          | NA |
| ASV_16s_19555 | 0.110303792 | -0.443952393 | 3.551343276 | 0.491877187 | NA          | NA |
| ASV_16s_19556 | 0.110303792 | -0.443952393 | 3.551343276 | 0.491877187 | NA          | NA |
| ASV_16s_19557 | 0.110303792 | -0.443952393 | 3.551343276 | 0.491877187 | NA          | NA |
| ASV_16s_19558 | 0.168007674 | -0.582632909 | 3.550948162 | 0.625003528 | NA          | NA |
| ASV_16s_19559 | 0.035143493 | -0.148695474 | 3.551167301 | 0.146033668 | NA          | NA |
| ASV_16s_19560 | 0.032790334 | -0.145420021 | 3.551201011 | 0.130685791 | 0.999994172 | NA |
| ASV_16s_19561 | 0.036772479 | 0.164102047  | 3.55121406  | 0.183517191 | 0.999981264 | NA |
| ASV_16s_19562 | 0.031172537 | -0.143023904 | 3.551226954 | 0.120024135 | NA          | NA |
| ASV_16s_19563 | 0.071398673 | 0.220239283  | 3.550981456 | 0.329784181 | NA          | NA |
| ASV_16s_19568 | 0.154980492 | 0.687544216  | 3.550982468 | 0.73000359  | NA          | NA |
| ASV_16s_19569 | 0.116474886 | -0.124665311 | 3.551671358 | 0.596668406 | 0.99900994  | NA |
| ASV_16s_19570 | 0.116857874 | 0.04855047   | 3.551844439 | 0.513913405 | 0.999393924 | NA |
| ASV_16s_19571 | 0.145511996 | -0.494215243 | 3.551245901 | 0.559377002 | 0.999198719 | NA |
| ASV_16s_19572 | 0.119096918 | 0.411449836  | 3.551815262 | 0.589352252 | 0.999049114 | NA |
| ASV_16s_19573 | 0.124199608 | -0.092206076 | 3.551247556 | 0.524223905 | 0.99935286  | NA |
| ASV_16s_19574 | 0.118289413 | 0.274808027  | 3.551713304 | 0.550095313 | 0.999241595 | NA |
| ASV_16s_19575 | 0.149029693 | -0.509281627 | 3.551086759 | 0.621314853 | 0.998870004 | NA |
| ASV_16s_19576 | 0.140703746 | -0.04054407  | 3.551553228 | 0.729890912 | 0.998095379 | NA |
| ASV_16s_19577 | 0.145634566 | -0.483278975 | 3.551091888 | 0.62732306  | 0.998833987 | NA |
| ASV_16s_19578 | 0.132073151 | -0.445826439 | 3.551233997 | 0.578716781 | 0.999104177 | NA |
| ASV_16s_19579 | 0.121486618 | 0.311241969  | 3.55196193  | 0.380802134 | 0.999776574 | NA |
| ASV_16s_19580 | 0.091374725 | 0.236490076  | 3.551678409 | 0.431524678 | 0.999660601 | NA |
| ASV_16s_19581 | 0.151009066 | -0.487286302 | 3.55101389  | 0.658651241 | 0.998633662 | NA |
| ASV_16s_19582 | 0.142516843 | -0.456172881 | 3.551088775 | 0.630536809 | 0.998814409 | NA |
| ASV_16s_19583 | 0.137843524 | -0.433148973 | 3.551119351 | 0.618123305 | 0.998888829 | NA |
| ASV_16s_19584 | 0.115744271 | -0.095092589 | 3.551453626 | 0.578208897 | 0.999106752 | NA |
| ASV_16s_19585 | 0.132344781 | -0.362974789 | 3.551586488 | 0.37470795  | 0.999788343 | NA |
| ASV_16s_19586 | 0.147621449 | -0.434082751 | 3.550998189 | 0.673145868 | 0.99853367  | NA |
| ASV_16s_19587 | 0.177378382 | 0.075263423  | 3.551019878 | 0.860276123 | 0.996779057 | NA |
| ASV_16s_19588 | 0.117844855 | 0.247662856  | 3.551363332 | 0.390500348 | 0.999756927 | NA |
| ASV_16s_19589 | 0.136726725 | 0.330122623  | 3.551225239 | 0.694246674 | 0.998379553 | NA |
| ASV_16s_19590 | 0.129545398 | -0.363814886 | 3.551161392 | 0.614141699 | 0.998912018 | NA |
| ASV_16s_19591 | 0.11992201  | 0.258219978  | 3.551635293 | 0.451961132 | 0.999604064 | NA |
| ASV_16s_19592 | 0.124150791 | 0.942299031  | 3.551607477 | 0.397307236 | 0.999742449 | NA |

|               |             |              |             |             |             |    |
|---------------|-------------|--------------|-------------|-------------|-------------|----|
| ASV_16s_19593 | 0.13450752  | 0.67700874   | 3.551462916 | 0.636086308 | 0.998780085 | NA |
| ASV_16s_19594 | 0.151860807 | -0.386074673 | 3.550987088 | 0.706850782 | 0.998282543 | NA |
| ASV_16s_19595 | 0.139972141 | -0.371546029 | 3.551058248 | 0.660770334 | 0.998619337 | NA |
| ASV_16s_19596 | 0.12891346  | -0.339229368 | 3.551156506 | 0.619685624 | 0.998879641 | NA |
| ASV_16s_19597 | 0.138536582 | -0.34132111  | 3.551062163 | 0.66187741  | 0.998611814 | NA |
| ASV_16s_19598 | 0.117304281 | 0.096771414  | 3.551222764 | 0.55986811  | 0.999196406 | NA |
| ASV_16s_19599 | 0.176429532 | 0.984878454  | 3.551524455 | 0.545254667 | 0.999263328 | NA |
| ASV_16s_19600 | 0.142206743 | -0.343414799 | 3.55102756  | 0.677397285 | 0.998503442 | NA |
| ASV_16s_19601 | 0.143692147 | -0.343423737 | 3.551013835 | 0.683920664 | 0.998456255 | NA |
| ASV_16s_19602 | 0.147123424 | -0.142678863 | 3.551208385 | 0.600227799 | 0.998990495 | NA |
| ASV_16s_19603 | 0.145085174 | -0.346607678 | 3.551009256 | 0.688809482 | 0.99842025  | NA |
| ASV_16s_19604 | 0.145781688 | -0.350576709 | 3.551003044 | 0.691172799 | 0.998826245 | NA |
| ASV_16s_19605 | 0.146910965 | -0.288661512 | 3.55170949  | 0.53441284  | 0.999310465 | NA |
| ASV_16s_19606 | 0.13276314  | -0.314791336 | 3.551099401 | 0.642675924 | 0.99873847  | NA |
| ASV_16s_19607 | 0.150351216 | -0.285230559 | 3.551032455 | 0.713426699 | 0.998230432 | NA |
| ASV_16s_19608 | 0.148721525 | -0.285229565 | 3.551036058 | 0.707383864 | 0.998278357 | NA |
| ASV_16s_19609 | 0.139599554 | -0.219790159 | 3.551114275 | 0.703027257 | 0.998312369 | NA |
| ASV_16s_19610 | 0.226315844 | -0.039123452 | 3.550912173 | 1.170564594 | 0.991588924 | NA |
| ASV_16s_19611 | 0.143649834 | -0.165679998 | 3.551068558 | 0.696894343 | 0.998359486 | NA |
| ASV_16s_19612 | 0.136396078 | -0.08667846  | 3.551153719 | 0.674065259 | 0.998527168 | NA |
| ASV_16s_19613 | 0.140874978 | 0.182895483  | 3.550118353 | 0.614039745 | 0.998912607 | NA |
| ASV_16s_19614 | 0.135054342 | -0.056019066 | 3.551103211 | 0.670746686 | 0.998550548 | NA |
| ASV_16s_19615 | 0.122867642 | -0.291227536 | 3.551055246 | 0.646563162 | 0.998713482 | NA |
| ASV_16s_19616 | 0.120978305 | -0.006246537 | 3.551466537 | 0.685612185 | 0.99844386  | NA |
| ASV_16s_19617 | 0.141949835 | -0.00241075  | 3.551059652 | 0.699110014 | 0.998342566 | NA |
| ASV_16s_19618 | 0.160978062 | -0.463922857 | 3.551390382 | 0.396436263 | 0.999744334 | NA |
| ASV_16s_19619 | 0.130215168 | -0.057777507 | 3.551419796 | 0.583875987 | 0.999077743 | NA |
| ASV_16s_19620 | 0.120914636 | 0.108975276  | 3.551753657 | 0.428533091 | 0.999668383 | NA |
| ASV_16s_19621 | 0.18971174  | 0.729421155  | 3.551229438 | 0.858059037 | 0.996805313 | NA |
| ASV_16s_19622 | 0.095953475 | 1.144997201  | 3.551652194 | 0.211878308 | 0.999969356 | NA |
| ASV_16s_19623 | 0.162696493 | 0.221473219  | 3.551721621 | 0.380117353 | 0.999777918 | NA |
| ASV_16s_19624 | 0.153457522 | -0.272329173 | 3.551159555 | 0.541703565 | NA          | NA |
| ASV_16s_19625 | 0.206652667 | 0.332940819  | 3.551907614 | 0.488698141 | 0.999486821 | NA |
| ASV_16s_19626 | 0.153318003 | 1.128103485  | 3.551243525 | 0.545901194 | NA          | NA |
| ASV_16s_19627 | 0.157417925 | 1.364580901  | 3.551196243 | 0.351403247 | 0.999829418 | NA |
| ASV_16s_19628 | 0.125047271 | 1.056293139  | 3.551409746 | 0.479393768 | 0.99951849  | NA |
| ASV_16s_19629 | 0.133523448 | 1.079183119  | 3.551355901 | 0.50024112  | 0.999445598 | NA |
| ASV_16s_19630 | 0.137409271 | 1.089287466  | 3.551331834 | 0.5095627   | NA          | NA |
| ASV_16s_19631 | 0.155938256 | 1.133915082  | 3.551229397 | 0.548053074 | 0.999250816 | NA |
| ASV_16s_19632 | 0.126072831 | 1.059138757  | 3.551403896 | 0.481953204 | NA          | NA |
| ASV_16s_19633 | 0.126072831 | 1.059138757  | 3.551403896 | 0.481953204 | NA          | NA |
| ASV_16s_19634 | 0.126072831 | 1.059138757  | 3.551403896 | 0.481953204 | NA          | NA |
| ASV_16s_19635 | 0.170199745 | 0.653080667  | 3.551251657 | 0.849607524 | 0.996904119 | NA |
| ASV_16s_19636 | 0.119525707 | 0.339838694  | 3.551917201 | 0.500789727 | NA          | NA |
| ASV_16s_19637 | 0.160135506 | -0.456276677 | 3.551407851 | 0.51394572  | 0.999393799 | NA |
| ASV_16s_19638 | 0.13761346  | 0.348676266  | 3.55178417  | 0.331721486 | 0.999859517 | NA |
| ASV_16s_19639 | 0.144700446 | 0.348296107  | 3.551832038 | 0.561798801 | NA          | NA |
| ASV_16s_19640 | 0.187627526 | 0.099344564  | 3.551739154 | 0.530870475 | 0.999325412 | NA |
| ASV_16s_19641 | 0.15302476  | 0.151503634  | 3.551403284 | 0.755375098 | 0.997873147 | NA |
| ASV_16s_19642 | 0.163943725 | -0.435195271 | 3.551289712 | 0.497852438 | 0.999454307 | NA |
| ASV_16s_19643 | 0.092625283 | 0.330460752  | 3.551988215 | 0.425375893 | NA          | NA |
| ASV_16s_19644 | 0.1254167   | 0.341832014  | 3.551897719 | 0.515879474 | NA          | NA |
| ASV_16s_19645 | 0.1254167   | 0.341832014  | 3.551897719 | 0.515879474 | NA          | NA |
| ASV_16s_19646 | 0.105395088 | -0.092208985 | 3.551842032 | 0.39580233  | 0.999745699 | NA |
| ASV_16s_19647 | 0.111376244 | 0.347644906  | 3.551893959 | 0.269614854 | 0.999930346 | NA |
| ASV_16s_19648 | 0.149096785 | 0.349424377  | 3.551811582 | 0.569993081 | NA          | NA |
| ASV_16s_19649 | 0.176791888 | 0.36230589   | 3.551658514 | 0.62566698  | NA          | NA |
| ASV_16s_19650 | 0.092505909 | -0.36229232  | 3.551610967 | 0.432399573 | NA          | NA |
| ASV_16s_19651 | 0.13608473  | -0.475623239 | 3.551241532 | 0.547707888 | NA          | NA |
| ASV_16s_19652 | 0.13608473  | -0.475623239 | 3.551241532 | 0.547707888 | NA          | NA |
| ASV_16s_19653 | 0.123203736 | -0.368893646 | 3.551591783 | 0.417812406 | 0.999695266 | NA |
| ASV_16s_19654 | 0.121084363 | -0.442373077 | 3.551361725 | 0.511177836 | NA          | NA |
| ASV_16s_19655 | 0.122713318 | 1.089634468  | 3.55116779  | 0.415557977 | NA          | NA |
| ASV_16s_19656 | 0.122713318 | 1.089634468  | 3.55116779  | 0.415557977 | NA          | NA |
| ASV_16s_19657 | 0.122713318 | 1.089634468  | 3.55116779  | 0.415557977 | NA          | NA |
| ASV_16s_19658 | 0.143944174 | 0.366764134  | 3.551486789 | 0.496375309 | NA          | NA |
| ASV_16s_19659 | 0.190791026 | 0.388794405  | 3.551202617 | 0.590116859 | NA          | NA |

|               |             |              |             |             |             |    |
|---------------|-------------|--------------|-------------|-------------|-------------|----|
| ASV_16s_19660 | 0.154101733 | 0.036434869  | 3.550532942 | 0.875043688 | 0.996600572 | NA |
| ASV_16s_19661 | 0.140711332 | 0.365534142  | 3.551505318 | 0.489187177 | NA          | NA |
| ASV_16s_19662 | 0.127760123 | 0.359952885  | 3.551571868 | 0.458996531 | NA          | NA |
| ASV_16s_19663 | 0.131124743 | 0.62063144   | 3.551232745 | 0.630703647 | 0.998813386 | NA |
| ASV_16s_19664 | 0.105464473 | 0.348565185  | 3.551674311 | 0.401834247 | NA          | NA |
| ASV_16s_19665 | 0.105464473 | 0.348565185  | 3.551674311 | 0.401834247 | NA          | NA |
| ASV_16s_19666 | 0.114108821 | 0.353175552  | 3.551631401 | 0.424692493 | NA          | NA |
| ASV_16s_19667 | 0.141630513 | 0.36584406   | 3.551500554 | 0.483005862 | 0.999506358 | NA |
| ASV_16s_19668 | 0.039731719 | 0.339500606  | 3.5519144   | 0.180927101 | 0.999982155 | NA |
| ASV_16s_19669 | 0.064111094 | -0.281084979 | 3.55151691  | 0.276214575 | NA          | NA |
| ASV_16s_19670 | 0.153596184 | -0.125746042 | 3.550542762 | 0.685173743 | 0.998447079 | NA |
| ASV_16s_19671 | 0.127055081 | -0.285960946 | 3.550988036 | 0.533687796 | NA          | NA |
| ASV_16s_19672 | 0.193705485 | -0.538453253 | 3.550382935 | 0.591613567 | NA          | NA |
| ASV_16s_19673 | 0.077861454 | -0.337606912 | 3.55141891  | 0.323363608 | NA          | NA |
| ASV_16s_19674 | 0.071358347 | -0.312217968 | 3.55146634  | 0.301620197 | NA          | NA |
| ASV_16s_19675 | 0.071358347 | -0.312217968 | 3.55146634  | 0.301620197 | NA          | NA |
| ASV_16s_19676 | 0.127760123 | -0.472262126 | 3.550997579 | 0.461599393 | NA          | NA |
| ASV_16s_19677 | 0.139960396 | 1.133055151  | 3.551072835 | 0.457148208 | NA          | NA |
| ASV_16s_19678 | 0.127760123 | -0.078196074 | 3.550941934 | 0.723315523 | NA          | NA |
| ASV_16s_19679 | 0.127760123 | -0.078196074 | 3.550941934 | 0.723315523 | NA          | NA |
| ASV_16s_19680 | 0.127760123 | -0.078196074 | 3.550941934 | 0.723315523 | NA          | NA |
| ASV_16s_19681 | 0.127760123 | -0.078196074 | 3.550941934 | 0.723315523 | NA          | NA |
| ASV_16s_19682 | 0.127760123 | -0.078196074 | 3.550941934 | 0.723315523 | NA          | NA |
| ASV_16s_19683 | 0.10894251  | -0.077950154 | 3.551015217 | 0.653301453 | NA          | NA |
| ASV_16s_19684 | 0.10894251  | -0.077950154 | 3.551015217 | 0.653301453 | NA          | NA |
| ASV_16s_19685 | 0.10894251  | -0.077950154 | 3.551015217 | 0.653301453 | NA          | NA |
| ASV_16s_19686 | 0.10894251  | -0.077950154 | 3.551015217 | 0.653301453 | NA          | NA |
| ASV_16s_19687 | 0.10894251  | -0.077950154 | 3.551015217 | 0.653301453 | NA          | NA |
| ASV_16s_19688 | 0.10894251  | -0.077950154 | 3.551015217 | 0.653301453 | NA          | NA |
| ASV_16s_19689 | 0.10894251  | -0.077950154 | 3.551015217 | 0.653301453 | NA          | NA |
| ASV_16s_19690 | 0.10894251  | -0.077950154 | 3.551015217 | 0.653301453 | NA          | NA |
| ASV_16s_19691 | 0.10894251  | -0.077950154 | 3.551015217 | 0.653301453 | NA          | NA |
| ASV_16s_19692 | 0.10894251  | -0.077950154 | 3.551015217 | 0.653301453 | NA          | NA |
| ASV_16s_19693 | 0.10894251  | -0.077950154 | 3.551015217 | 0.653301453 | NA          | NA |
| ASV_16s_19694 | 0.076017589 | 0.220220631  | 3.550957007 | 0.352151104 | 0.999828193 | NA |
| ASV_16s_19695 | 0.075993595 | 0.220220743  | 3.550957127 | 0.352036925 | 0.99982838  | NA |
| ASV_16s_19696 | 0.077407417 | 0.220215513  | 3.550950217 | 0.35873828  | 0.999817145 | NA |
| ASV_16s_19697 | 0.078162316 | 0.220212772  | 3.550946629 | 0.362288971 | 0.999810991 | NA |
| ASV_16s_19698 | 0.081103932 | 0.220202796  | 3.550933281 | 0.37598158  | NA          | NA |
| ASV_16s_19699 | 0.080941973 | 0.220203334  | 3.550933991 | 0.375235035 | NA          | NA |
| ASV_16s_19700 | 0.130401463 | 0.310953498  | 3.551088968 | 0.712882321 | NA          | NA |
| ASV_16s_19701 | 0.13538854  | 0.310952313  | 3.551070647 | 0.729156985 | 0.99810154  | NA |
| ASV_16s_19702 | 0.138422645 | 0.310951633  | 3.551060139 | 0.739979969 | NA          | NA |
| ASV_16s_19703 | 0.138422645 | 0.310951633  | 3.551060139 | 0.739979969 | NA          | NA |
| ASV_16s_19704 | 0.138422645 | 0.310951633  | 3.551060139 | 0.739979969 | NA          | NA |
| ASV_16s_19705 | 0.138422645 | 0.310951633  | 3.551060139 | 0.739979969 | NA          | NA |
| ASV_16s_19706 | 0.138179234 | 0.310951686  | 3.551060965 | 0.739173351 | 0.998016309 | NA |
| ASV_16s_19707 | 0.140759238 | 0.310951129  | 3.551052354 | 0.747688357 | NA          | NA |
| ASV_16s_19708 | 0.120698265 | 0.31095608   | 3.551128921 | 0.678529212 | NA          | NA |
| ASV_16s_19709 | 0.120698265 | 0.31095608   | 3.551128921 | 0.678529212 | NA          | NA |
| ASV_16s_19710 | 0.120698265 | 0.31095608   | 3.551128921 | 0.678529212 | NA          | NA |
| ASV_16s_19711 | 0.120698265 | 0.31095608   | 3.551128921 | 0.678529212 | NA          | NA |
| ASV_16s_19712 | 0.137984506 | 0.310951729  | 3.551061628 | 0.738527276 | NA          | NA |
| ASV_16s_19713 | 0.137984506 | 0.310951729  | 3.551061628 | 0.738527276 | NA          | NA |
| ASV_16s_19714 | 0.085436592 | 0.595637582  | 3.550871195 | 0.342317284 | NA          | NA |
| ASV_16s_19715 | 0.085436592 | 0.595637582  | 3.550871195 | 0.342317284 | NA          | NA |
| ASV_16s_19716 | 0.123804735 | 0.68721056   | 3.551089365 | 0.630441493 | NA          | NA |
| ASV_16s_19717 | 0.144368227 | 0.687446624  | 3.55101371  | 0.69779227  | NA          | NA |
| ASV_16s_19718 | 0.099131597 | -0.296144865 | 3.551705905 | 0.49789519  | 0.999454152 | NA |
| ASV_16s_19719 | 0.133937045 | 1.130978534  | 3.551566157 | 0.270722555 | 0.99992937  | NA |
| ASV_16s_19720 | 0.113402175 | -0.066933902 | 3.551135237 | 0.7208904   | 0.998170025 | NA |
| ASV_16s_19721 | 0.122717928 | -0.06720249  | 3.551051217 | 0.756517176 | 0.997862805 | NA |
| ASV_16s_19722 | 0.195323675 | 1.482486736  | 3.551207573 | 0.283233616 | 0.99991767  | NA |
| ASV_16s_19723 | 0.113897693 | -0.06656387  | 3.551156854 | 0.727964781 | 0.99811152  | NA |
| ASV_16s_19724 | 0.175685334 | 1.186292629  | 3.551291704 | 0.518405471 | 0.999376258 | NA |
| ASV_16s_19725 | 0.181438523 | -0.473018432 | 3.551186977 | 0.598482823 | 0.99900006  | NA |
| ASV_16s_19726 | 0.182574041 | -0.424497901 | 3.551229423 | 0.608345373 | 0.998945191 | NA |

|               |             |              |             |             |             |    |
|---------------|-------------|--------------|-------------|-------------|-------------|----|
| ASV_16s_19727 | 0.137686532 | 1.311495445  | 3.551414426 | 0.290981955 | 0.999909784 | NA |
| ASV_16s_19728 | 0.138971436 | 0.33993369   | 3.551801435 | 0.408733874 | 0.999716829 | NA |
| ASV_16s_19729 | 0.160897768 | 0.729975162  | 3.551565271 | 0.765757527 | 0.997777908 | NA |
| ASV_16s_19730 | 0.124335808 | -0.052062464 | 3.55125041  | 0.769895047 | 0.997739184 | NA |
| ASV_16s_19731 | 0.210145715 | -0.165524133 | 3.55029635  | 0.837761782 | 0.997039212 | NA |
| ASV_16s_19732 | 0.200488418 | 0.287561954  | 3.551771909 | 0.459879301 | 0.999580531 | NA |
| ASV_16s_19733 | 0.12220902  | 0.655215181  | 3.551858905 | 0.602186489 | 0.998979686 | NA |
| ASV_16s_19734 | 0.122497693 | -0.027726873 | 3.551372936 | 0.747553847 | 0.997943081 | NA |
| ASV_16s_19735 | 0.183080283 | -0.690623768 | 3.551203303 | 0.416073837 | 0.999699479 | NA |
| ASV_16s_19736 | 0.149490944 | 0.502086266  | 3.551160905 | 0.722429121 | 0.998157404 | NA |
| ASV_16s_19737 | 0.141576868 | 1.028886255  | 3.551414204 | 0.514920454 | NA          | NA |
| ASV_16s_19738 | 0.180665465 | 1.105666361  | 3.55115411  | 0.592354295 | NA          | NA |
| ASV_16s_19739 | 0.054540577 | 0.292465304  | 3.551896381 | 0.292339115 | 0.999908351 | NA |
| ASV_16s_19740 | 0.194959672 | 0.27946484   | 3.551555544 | 0.682190788 | NA          | NA |
| ASV_16s_19741 | 0.153833894 | 0.280294947  | 3.55163485  | 0.590192589 | NA          | NA |
| ASV_16s_19742 | 0.180549813 | -0.304318397 | 3.551067119 | 0.85763612  | 0.996810306 | NA |
| ASV_16s_19743 | 0.204512919 | -0.128667738 | 3.551272995 | 0.932670388 | 0.995842787 | NA |
| ASV_16s_19744 | 0.248838355 | -0.562848745 | 3.550308968 | 0.782486611 | NA          | NA |
| ASV_16s_19745 | 0.158368105 | 0.450512472  | 3.551091882 | 0.664702441 | 0.998592491 | NA |
| ASV_16s_19746 | 0.160445445 | 1.175824679  | 3.550969515 | 0.502086485 | NA          | NA |
| ASV_16s_19747 | 0.146061176 | 0.8936567    | 3.551360018 | 0.688739224 | 0.998420771 | NA |
| ASV_16s_19748 | 0.091427043 | -0.077631619 | 3.551110276 | 0.580938551 | NA          | NA |
| ASV_16s_19749 | 0.091427043 | -0.077631619 | 3.551110276 | 0.580938551 | NA          | NA |
| ASV_16s_19750 | 0.091427043 | -0.077631619 | 3.551110276 | 0.580938551 | NA          | NA |
| ASV_16s_19751 | 0.1032421   | -0.094634497 | 3.551208823 | 0.631639559 | 0.99880764  | NA |
| ASV_16s_19752 | 0.127804603 | 0.295525206  | 3.550853411 | 0.72264195  | 0.998155653 | NA |
| ASV_16s_19753 | 0.197008491 | 0.359433606  | 3.550969498 | 1.397822671 | 0.985637861 | NA |
| ASV_16s_19754 | 0.192917965 | 0.357452294  | 3.550563474 | 1.054231629 | 0.99390563  | NA |
| ASV_16s_19755 | 0.120625169 | -0.027941997 | 3.551190123 | 0.75669453  | NA          | NA |
| ASV_16s_19756 | 0.120625169 | -0.027941997 | 3.551190123 | 0.75669453  | NA          | NA |
| ASV_16s_19757 | 0.140345975 | 0.355831566  | 3.550937409 | 0.836481373 | 0.997053579 | NA |
| ASV_16s_19758 | 0.137829607 | -0.073154832 | 3.550950292 | 0.781985731 | NA          | NA |
| ASV_16s_19759 | 0.152842843 | 0.317439866  | 3.550821067 | 0.891566717 | 0.996393373 | NA |
| ASV_16s_19760 | 0.153997707 | 0.328850569  | 3.550821579 | 0.89251909  | 0.996381186 | NA |
| ASV_16s_19761 | 0.100665178 | -0.072592778 | 3.551110003 | 0.644196216 | NA          | NA |
| ASV_16s_19762 | 0.100665178 | -0.072592778 | 3.551110003 | 0.644196216 | NA          | NA |
| ASV_16s_19763 | 0.100665178 | -0.072592778 | 3.551110003 | 0.644196216 | NA          | NA |
| ASV_16s_19764 | 0.100665178 | -0.072592778 | 3.551110003 | 0.644196216 | NA          | NA |
| ASV_16s_19765 | 0.1315537   | 0.269716114  | 3.550924033 | 0.739011702 | 0.998017704 | NA |
| ASV_16s_19766 | 0.131041073 | 0.318559215  | 3.551040848 | 0.800504107 | 0.997438805 | NA |
| ASV_16s_19767 | 0.098856392 | -0.072554799 | 3.55112081  | 0.636711104 | NA          | NA |
| ASV_16s_19768 | 0.098856392 | -0.072554799 | 3.55112081  | 0.636711104 | NA          | NA |
| ASV_16s_19769 | 0.098856392 | -0.072554799 | 3.55112081  | 0.636711104 | NA          | NA |
| ASV_16s_19770 | 0.098856392 | -0.072554799 | 3.55112081  | 0.636711104 | NA          | NA |
| ASV_16s_19771 | 0.098856392 | -0.072554799 | 3.55112081  | 0.636711104 | NA          | NA |
| ASV_16s_19772 | 0.122241243 | 0.274622279  | 3.551068126 | 0.764284446 | 0.997791589 | NA |
| ASV_16s_19773 | 0.129070289 | -0.073050835 | 3.550979806 | 0.742078441 | 0.997991124 | NA |
| ASV_16s_19774 | 0.140429459 | 0.368341793  | 3.551125049 | 0.816152553 | 0.997275596 | NA |
| ASV_16s_19775 | 0.122657133 | -0.072965995 | 3.551003899 | 0.729244749 | NA          | NA |
| ASV_16s_19776 | 0.122657133 | -0.072965995 | 3.551003899 | 0.729244749 | NA          | NA |
| ASV_16s_19777 | 0.129853392 | 0.026851619  | 3.551029179 | 0.702903183 | NA          | NA |
| ASV_16s_19778 | 0.139825211 | 0.281445236  | 3.550920862 | 0.834688824 | 0.997073616 | NA |
| ASV_16s_19779 | 0.137599841 | 0.36025003   | 3.551329451 | 0.798876826 | NA          | NA |
| ASV_16s_19780 | 0.137599841 | 0.36025003   | 3.551329451 | 0.798876826 | NA          | NA |
| ASV_16s_19781 | 0.137599841 | 0.36025003   | 3.551329451 | 0.798876826 | NA          | NA |
| ASV_16s_19782 | 0.132862199 | 0.340540257  | 3.551778311 | 0.573649703 | 0.999129638 | NA |
| ASV_16s_19783 | 0.129946727 | 0.332228065  | 3.551401929 | 0.589074234 | 0.999050581 | NA |
| ASV_16s_19784 | 0.173484013 | 0.335914027  | 3.55124885  | 0.676573764 | 0.998509329 | NA |
| ASV_16s_19785 | 0.122321505 | 0.36022248   | 3.551420172 | 0.745997745 | NA          | NA |
| ASV_16s_19786 | 0.122321505 | 0.36022248   | 3.551420172 | 0.745997745 | NA          | NA |
| ASV_16s_19787 | 0.122321505 | 0.36022248   | 3.551420172 | 0.745997745 | NA          | NA |
| ASV_16s_19788 | 0.122321505 | 0.36022248   | 3.551420172 | 0.745997745 | NA          | NA |
| ASV_16s_19789 | 0.122321505 | 0.36022248   | 3.551420172 | 0.745997745 | NA          | NA |
| ASV_16s_19790 | 0.122321505 | 0.36022248   | 3.551420172 | 0.745997745 | NA          | NA |
| ASV_16s_19791 | 0.122321505 | 0.36022248   | 3.551420172 | 0.745997745 | NA          | NA |
| ASV_16s_19792 | 0.122321505 | 0.36022248   | 3.551420172 | 0.745997745 | NA          | NA |
| ASV_16s_19793 | 0.122321505 | 0.36022248   | 3.551420172 | 0.745997745 | NA          | NA |

|               |             |             |             |             |             |    |
|---------------|-------------|-------------|-------------|-------------|-------------|----|
| ASV_16s_19794 | 0.122321505 | 0.36022248  | 3.551420172 | 0.745997745 | NA          | NA |
| ASV_16s_19795 | 0.122321505 | 0.36022248  | 3.551420172 | 0.745997745 | NA          | NA |
| ASV_16s_19796 | 0.122321505 | 0.36022248  | 3.551420172 | 0.745997745 | NA          | NA |
| ASV_16s_19797 | 0.122321505 | 0.36022248  | 3.551420172 | 0.745997745 | NA          | NA |
| ASV_16s_19798 | 0.15849131  | 0.315939908 | 3.551039515 | 0.822077087 | NA          | NA |
| ASV_16s_19799 | 0.160892225 | 0.315939782 | 3.551032874 | 0.827757483 | 0.997150252 | NA |
| ASV_16s_19800 | 0.135727468 | 0.31594002  | 3.551114755 | 0.750964886 | 0.997912771 | NA |
| ASV_16s_19801 | 0.133451083 | 0.315940034 | 3.551123674 | 0.74394095  | 0.997974866 | NA |
| ASV_16s_19802 | 0.136999404 | 0.315940013 | 3.551109883 | 0.758038457 | NA          | NA |
| ASV_16s_19803 | 0.136999404 | 0.315940013 | 3.551109883 | 0.758038457 | NA          | NA |
| ASV_16s_19804 | 0.153406025 | 0.693240345 | 3.551106028 | 0.877845626 | 0.996565997 | NA |
| ASV_16s_19805 | 0.13186647  | 0.315940043 | 3.551130055 | 0.740573199 | 0.998004199 | NA |
| ASV_16s_19806 | 0.171798447 | 0.315939857 | 3.551004785 | 0.861658769 | 0.996762612 | NA |
| ASV_16s_19807 | 0.127760123 | 0.315940069 | 3.551147345 | 0.726505389 | NA          | NA |
| ASV_16s_19808 | 0.127760123 | 0.315940069 | 3.551147345 | 0.726505389 | NA          | NA |
| ASV_16s_19809 | 0.127760123 | 0.315940069 | 3.551147345 | 0.726505389 | NA          | NA |
| ASV_16s_19810 | 0.127760123 | 0.315940069 | 3.551147345 | 0.726505389 | NA          | NA |
| ASV_16s_19811 | 0.127760123 | 0.315940069 | 3.551147345 | 0.726505389 | NA          | NA |
| ASV_16s_19812 | 0.127760123 | 0.315940069 | 3.551147345 | 0.726505389 | NA          | NA |
| ASV_16s_19813 | 0.127760123 | 0.315940069 | 3.551147345 | 0.726505389 | NA          | NA |
| ASV_16s_19814 | 0.127760123 | 0.315940069 | 3.551147345 | 0.726505389 | NA          | NA |
| ASV_16s_19815 | 0.127760123 | 0.315940069 | 3.551147345 | 0.726505389 | NA          | NA |
| ASV_16s_19816 | 0.127760123 | 0.315940069 | 3.551147345 | 0.726505389 | NA          | NA |
| ASV_16s_19817 | 0.172022758 | 0.59605022  | 3.550709891 | 0.631999066 | NA          | NA |
| ASV_16s_19818 | 0.121670696 | 0.687181551 | 3.551098669 | 0.623076599 | NA          | NA |
| ASV_16s_19819 | 0.121670696 | 0.687181551 | 3.551098669 | 0.623076599 | NA          | NA |
| ASV_16s_19820 | 0.219806623 | 0.687937763 | 3.550856806 | 0.902497418 | NA          | NA |
| ASV_16s_19821 | 0.261879785 | 0.734190514 | 3.550986697 | 1.085708252 | 0.993324978 | NA |
| ASV_16s_19822 | 0.221481087 | 1.113551465 | 3.551032876 | 0.750167342 | 0.997919884 | NA |
| ASV_16s_19823 | 0.187222764 | 1.095650318 | 3.551130366 | 0.665094317 | 0.998589796 | NA |
| ASV_16s_19824 | 0.169010943 | 0.733420758 | 3.551210361 | 0.832793542 | NA          | NA |
| ASV_16s_19825 | 0.169010943 | 0.733420758 | 3.551210361 | 0.832793542 | NA          | NA |
| ASV_16s_19826 | 0.169010943 | 0.733420758 | 3.551210361 | 0.832793542 | NA          | NA |
| ASV_16s_19827 | 0.169010943 | 0.733420758 | 3.551210361 | 0.832793542 | NA          | NA |
| ASV_16s_19828 | 0.169010943 | 0.733420758 | 3.551210361 | 0.832793542 | NA          | NA |
| ASV_16s_19829 | 0.169010943 | 0.733420758 | 3.551210361 | 0.832793542 | NA          | NA |
| ASV_16s_19830 | 0.169010943 | 0.733420758 | 3.551210361 | 0.832793542 | NA          | NA |
| ASV_16s_19831 | 0.169010943 | 0.733420758 | 3.551210361 | 0.832793542 | NA          | NA |
| ASV_16s_19832 | 0.169010943 | 0.733420758 | 3.551210361 | 0.832793542 | NA          | NA |
| ASV_16s_19833 | 0.169010943 | 0.733420758 | 3.551210361 | 0.832793542 | NA          | NA |
| ASV_16s_19834 | 0.169010943 | 0.733420758 | 3.551210361 | 0.832793542 | NA          | NA |
| ASV_16s_19835 | 0.169010943 | 0.733420758 | 3.551210361 | 0.832793542 | NA          | NA |
| ASV_16s_19836 | 0.169010943 | 0.733420758 | 3.551210361 | 0.832793542 | NA          | NA |
| ASV_16s_19837 | 0.169010943 | 0.733420758 | 3.551210361 | 0.832793542 | NA          | NA |
| ASV_16s_19838 | 0.169010943 | 0.733420758 | 3.551210361 | 0.832793542 | NA          | NA |
| ASV_16s_19839 | 0.169010943 | 0.733420758 | 3.551210361 | 0.832793542 | NA          | NA |
| ASV_16s_19840 | 0.169010943 | 0.733420758 | 3.551210361 | 0.832793542 | NA          | NA |
| ASV_16s_19841 | 0.169010943 | 0.733420758 | 3.551210361 | 0.832793542 | NA          | NA |
| ASV_16s_19842 | 0.18338381  | 1.043889809 | 3.55101079  | 0.65106537  | 0.998684128 | NA |
| ASV_16s_19843 | 0.083720528 | 0.690144677 | 3.551638323 | 0.539347699 | NA          | NA |
| ASV_16s_19844 | 0.083720528 | 0.690144677 | 3.551638323 | 0.539347699 | NA          | NA |
| ASV_16s_19845 | 0.083720528 | 0.690144677 | 3.551638323 | 0.539347699 | NA          | NA |
| ASV_16s_19846 | 0.083720528 | 0.690144677 | 3.551638323 | 0.539347699 | NA          | NA |
| ASV_16s_19847 | 0.15712542  | 0.692571233 | 3.551023308 | 0.760942065 | NA          | NA |
| ASV_16s_19848 | 0.15712542  | 0.692571233 | 3.551023308 | 0.760942065 | NA          | NA |
| ASV_16s_19849 | 0.15712542  | 0.692571233 | 3.551023308 | 0.760942065 | NA          | NA |
| ASV_16s_19850 | 0.159437155 | 0.692594259 | 3.551016531 | 0.767175046 | 0.997764691 | NA |
| ASV_16s_19851 | 0.161583766 | 0.69261506  | 3.551010409 | 0.773464652 | NA          | NA |
| ASV_16s_19852 | 0.161583766 | 0.69261506  | 3.551010409 | 0.773464652 | NA          | NA |
| ASV_16s_19853 | 0.161583766 | 0.69261506  | 3.551010409 | 0.773464652 | NA          | NA |
| ASV_16s_19854 | 0.161583766 | 0.69261506  | 3.551010409 | 0.773464652 | NA          | NA |
| ASV_16s_19855 | 0.161583766 | 0.69261506  | 3.551010409 | 0.773464652 | NA          | NA |
| ASV_16s_19856 | 0.149056491 | 0.692485277 | 3.551048618 | 0.733295268 | 0.998066627 | NA |
| ASV_16s_19857 | 0.145298308 | 0.692442045 | 3.551061352 | 0.721680733 | 0.998163549 | NA |
| ASV_16s_19858 | 0.178018741 | 0.69275786  | 3.550968405 | 0.815354879 | 0.997284076 | NA |
| ASV_16s_19859 | 0.127760123 | 0.692208449 | 3.551130555 | 0.668481874 | NA          | NA |
| ASV_16s_19860 | 0.127760123 | 0.692208449 | 3.551130555 | 0.668481874 | NA          | NA |

|               |             |              |             |             |             |    |
|---------------|-------------|--------------|-------------|-------------|-------------|----|
| ASV_16s_19861 | 0.127760123 | 0.692208449  | 3.551130555 | 0.668481874 | NA          | NA |
| ASV_16s_19862 | 0.127760123 | 0.692208449  | 3.551130555 | 0.668481874 | NA          | NA |
| ASV_16s_19863 | 0.127760123 | 0.692208449  | 3.551130555 | 0.668481874 | NA          | NA |
| ASV_16s_19864 | 0.127760123 | 0.692208449  | 3.551130555 | 0.668481874 | NA          | NA |
| ASV_16s_19865 | 0.127760123 | 0.692208449  | 3.551130555 | 0.668481874 | NA          | NA |
| ASV_16s_19866 | 0.127760123 | 0.692208449  | 3.551130555 | 0.668481874 | NA          | NA |
| ASV_16s_19867 | 0.127760123 | 0.692208449  | 3.551130555 | 0.668481874 | NA          | NA |
| ASV_16s_19868 | 0.149829245 | 0.692493779  | 3.551046114 | 0.732739932 | 0.998071337 | NA |
| ASV_16s_19869 | 0.156613502 | 0.692565874  | 3.551024886 | 0.752595645 | 0.997898177 | NA |
| ASV_16s_19870 | 0.187346754 | 0.692827925  | 3.550947812 | 0.839734981 | NA          | NA |
| ASV_16s_19871 | 0.106070161 | 0.297361847  | 3.551909876 | 0.463853033 | NA          | NA |
| ASV_16s_19872 | 0.106070161 | 0.297361847  | 3.551909876 | 0.463853033 | NA          | NA |
| ASV_16s_19873 | 0.106070161 | 0.297361847  | 3.551909876 | 0.463853033 | NA          | NA |
| ASV_16s_19874 | 0.106070161 | 0.297361847  | 3.551909876 | 0.463853033 | NA          | NA |
| ASV_16s_19875 | 0.106070161 | 0.297361847  | 3.551909876 | 0.463853033 | NA          | NA |
| ASV_16s_19876 | 0.106070161 | 0.297361847  | 3.551909876 | 0.463853033 | NA          | NA |
| ASV_16s_19877 | 0.106070161 | 0.297361847  | 3.551909876 | 0.463853033 | NA          | NA |
| ASV_16s_19878 | 0.106070161 | 0.297361847  | 3.551909876 | 0.463853033 | NA          | NA |
| ASV_16s_19879 | 0.106070161 | 0.297361847  | 3.551909876 | 0.463853033 | NA          | NA |
| ASV_16s_19880 | 0.106070161 | 0.297361847  | 3.551909876 | 0.463853033 | NA          | NA |
| ASV_16s_19881 | 0.106070161 | 0.297361847  | 3.551909876 | 0.463853033 | NA          | NA |
| ASV_16s_19882 | 0.106070161 | 0.297361847  | 3.551909876 | 0.463853033 | NA          | NA |
| ASV_16s_19883 | 0.106070161 | 0.297361847  | 3.551909876 | 0.463853033 | NA          | NA |
| ASV_16s_19884 | 0.106070161 | 0.297361847  | 3.551909876 | 0.463853033 | NA          | NA |
| ASV_16s_19885 | 0.106070161 | 0.297361847  | 3.551909876 | 0.463853033 | NA          | NA |
| ASV_16s_19886 | 0.106070161 | 0.297361847  | 3.551909876 | 0.463853033 | NA          | NA |
| ASV_16s_19887 | 0.106070161 | 0.297361847  | 3.551909876 | 0.463853033 | NA          | NA |
| ASV_16s_19888 | 0.106070161 | 0.297361847  | 3.551909876 | 0.463853033 | NA          | NA |
| ASV_16s_19889 | 0.106070161 | 0.297361847  | 3.551909876 | 0.463853033 | NA          | NA |
| ASV_16s_19890 | 0.106070161 | 0.297361847  | 3.551909876 | 0.463853033 | NA          | NA |
| ASV_16s_19891 | 0.106070161 | 0.297361847  | 3.551909876 | 0.463853033 | NA          | NA |
| ASV_16s_19892 | 0.106070161 | 0.297361847  | 3.551909876 | 0.463853033 | NA          | NA |
| ASV_16s_19893 | 0.112272366 | 0.097193484  | 3.551712515 | 0.610541118 | 0.998932705 | NA |
| ASV_16s_19894 | 0.107623674 | 0.068031884  | 3.551704544 | 0.624163159 | 0.998853024 | NA |
| ASV_16s_19895 | 0.107882593 | 0.036201794  | 3.551667868 | 0.640083928 | 0.998754951 | NA |
| ASV_16s_19896 | 0.106110089 | 0.048030588  | 3.55169105  | 0.631315203 | 0.998809634 | NA |
| ASV_16s_19897 | 0.107882593 | 0.036201794  | 3.551667868 | 0.640083928 | 0.998754951 | NA |
| ASV_16s_19898 | 0.108141512 | 0.00585653   | 3.551634401 | 0.653706488 | 0.998666702 | NA |
| ASV_16s_19899 | 0.118474571 | -0.054000665 | 3.551507546 | 0.706688034 | 0.99828382  | NA |
| ASV_16s_19900 | 0.106121498 | -0.0097754   | 3.551630486 | 0.654378523 | 0.998662243 | NA |
| ASV_16s_19901 | 0.106121498 | -0.0097754   | 3.551630486 | 0.654378523 | 0.998662243 | NA |
| ASV_16s_19902 | 0.10840043  | -0.023544432 | 3.551600822 | 0.665098042 | 0.998589771 | NA |
| ASV_16s_19903 | 0.108659349 | -0.051738648 | 3.551571108 | 0.674308091 | 0.998525447 | NA |
| ASV_16s_19904 | 0.108918268 | -0.078924838 | 3.551544759 | 0.681181061 | 0.998476191 | NA |
| ASV_16s_19905 | 0.112312295 | -0.096474923 | 3.551506756 | 0.696502682 | 0.998362465 | NA |
| ASV_16s_19906 | 0.106132906 | -0.063975574 | 3.551576264 | 0.668878834 | 0.998563597 | NA |
| ASV_16s_19907 | 0.106132906 | -0.063975574 | 3.551576264 | 0.668878834 | 0.998563597 | NA |
| ASV_16s_19908 | 0.109177187 | -0.105327921 | 3.551520895 | 0.685662526 | 0.99844349  | NA |
| ASV_16s_19909 | 0.10613861  | -0.089784023 | 3.551553447 | 0.672779061 | 0.998536259 | NA |
| ASV_16s_19910 | 0.109436106 | -0.131321321 | 3.551496287 | 0.687716295 | 0.998428349 | NA |
| ASV_16s_19911 | 0.106144314 | -0.114984148 | 3.551533288 | 0.67429504  | 0.99852554  | NA |
| ASV_16s_19912 | 0.109436106 | -0.131321321 | 3.551496287 | 0.687716295 | 0.998428349 | NA |
| ASV_16s_19913 | 0.109695025 | -0.156689227 | 3.551474506 | 0.687617066 | 0.998429083 | NA |
| ASV_16s_19914 | 0.109695025 | -0.156689227 | 3.551474506 | 0.687617066 | 0.998429083 | NA |
| ASV_16s_19915 | 0.109695025 | -0.156689227 | 3.551474506 | 0.687617066 | 0.998429083 | NA |
| ASV_16s_19916 | 0.109695025 | -0.156689227 | 3.551474506 | 0.687617066 | 0.998429083 | NA |
| ASV_16s_19917 | 0.109953944 | -0.18155947  | 3.551455321 | 0.68515923  | 0.998447186 | NA |
| ASV_16s_19918 | 0.120287003 | -0.224114783 | 3.551342862 | 0.725666775 | 0.998130659 | NA |
| ASV_16s_19919 | 0.110212862 | -0.205960465 | 3.551438154 | 0.68026323  | 0.998482831 | NA |
| ASV_16s_19920 | 0.110212862 | -0.205960465 | 3.551438154 | 0.68026323  | 0.998482831 | NA |
| ASV_16s_19921 | 0.110471781 | -0.230147493 | 3.551420143 | 0.673099103 | 0.998534    | NA |
| ASV_16s_19922 | 0.134296904 | -0.313920207 | 3.551178449 | 0.760796237 | 0.997823762 | NA |
| ASV_16s_19923 | 0.110471781 | -0.230147493 | 3.551420143 | 0.673099103 | 0.998534    | NA |
| ASV_16s_19924 | 0.108446063 | -0.221577192 | 3.551440347 | 0.666181601 | 0.998582302 | NA |
| ASV_16s_19925 | 0.110471781 | -0.230147493 | 3.551420143 | 0.673099103 | 0.998534    | NA |
| ASV_16s_19926 | 0.109211411 | -0.2480962   | 3.551416777 | 0.658877633 | 0.998632137 | NA |
| ASV_16s_19927 | 0.1107307   | -0.254370887 | 3.551401118 | 0.663807987 | 0.998598628 | NA |

|               |             |              |             |             |             |    |
|---------------|-------------|--------------|-------------|-------------|-------------|----|
| ASV_16s_19928 | 0.131454327 | -0.326325151 | 3.551198687 | 0.735429043 | 0.998048461 | NA |
| ASV_16s_19929 | 0.10871639  | -0.292654836 | 3.55139419  | 0.631787559 | 0.99880673  | NA |
| ASV_16s_19930 | 0.115453326 | -0.317758809 | 3.551331398 | 0.651237312 | 0.998682998 | NA |
| ASV_16s_19931 | 0.179940261 | -0.60309155  | 3.550880997 | 0.651003883 | NA          | NA |
| ASV_16s_19932 | 0.144713135 | -0.536216766 | 3.551096804 | 0.575005197 | NA          | NA |
| ASV_16s_19933 | 0.144713135 | -0.536216766 | 3.551096804 | 0.575005197 | NA          | NA |
| ASV_16s_19934 | 0.144713135 | -0.536216766 | 3.551096804 | 0.575005197 | NA          | NA |
| ASV_16s_19935 | 0.144713135 | -0.536216766 | 3.551096804 | 0.575005197 | NA          | NA |
| ASV_16s_19936 | 0.146976804 | -0.541037247 | 3.551080819 | 0.579500919 | 0.999100193 | NA |
| ASV_16s_19937 | 0.146976804 | -0.541037247 | 3.551080819 | 0.579500919 | 0.999100193 | NA |
| ASV_16s_19938 | 0.137758451 | -0.519666141 | 3.551141953 | 0.560620097 | 0.999192855 | NA |
| ASV_16s_19939 | 0.137758451 | -0.519666141 | 3.551141953 | 0.560620097 | 0.999192855 | NA |
| ASV_16s_19940 | 0.121024108 | -0.475423736 | 3.551256854 | 0.51482269  | 0.999390376 | NA |
| ASV_16s_19941 | 0.147499189 | -0.542139678 | 3.551077184 | 0.580547499 | 0.999094856 | NA |
| ASV_16s_19942 | 0.149240474 | -0.545787164 | 3.551065215 | 0.584060196 | NA          | NA |
| ASV_16s_19943 | 0.149240474 | -0.545787164 | 3.551065215 | 0.584060196 | NA          | NA |
| ASV_16s_19944 | 0.140311638 | -0.52599276  | 3.551125832 | 0.565632007 | 0.999168919 | NA |
| ASV_16s_19945 | 0.146384495 | -0.539782194 | 3.551084965 | 0.578318804 | NA          | NA |
| ASV_16s_19946 | 0.125718375 | -0.48846524  | 3.551222461 | 0.527862186 | 0.999337931 | NA |
| ASV_16s_19947 | 0.112802051 | -0.451486976 | 3.551322133 | 0.498731779 | NA          | NA |
| ASV_16s_19948 | 0.112802051 | -0.451486976 | 3.551322133 | 0.498731779 | NA          | NA |
| ASV_16s_19949 | 0.112802051 | -0.451486976 | 3.551322133 | 0.498731779 | NA          | NA |
| ASV_16s_19950 | 0.112802051 | -0.451486976 | 3.551322133 | 0.498731779 | NA          | NA |
| ASV_16s_19951 | 0.112802051 | -0.451486976 | 3.551322133 | 0.498731779 | NA          | NA |
| ASV_16s_19952 | 0.110016688 | -0.442997757 | 3.551345975 | 0.490976633 | 0.999478855 | NA |
| ASV_16s_19953 | 0.108750614 | -0.439073077 | 3.551357121 | 0.487406389 | 0.9994913   | NA |
| ASV_16s_19954 | 0.106218467 | -0.431101664 | 3.55138001  | 0.480228371 | NA          | NA |
| ASV_16s_19955 | 0.106218467 | -0.431101664 | 3.55138001  | 0.480228371 | NA          | NA |
| ASV_16s_19956 | 0.106218467 | -0.431101664 | 3.55138001  | 0.480228371 | NA          | NA |
| ASV_16s_19957 | 0.106218467 | -0.431101664 | 3.55138001  | 0.480228371 | NA          | NA |
| ASV_16s_19958 | 0.106218467 | -0.431101664 | 3.55138001  | 0.480228371 | NA          | NA |
| ASV_16s_19959 | 0.106218467 | -0.431101664 | 3.55138001  | 0.480228371 | NA          | NA |
| ASV_16s_19960 | 0.106218467 | -0.431101664 | 3.55138001  | 0.480228371 | NA          | NA |
| ASV_16s_19961 | 0.106218467 | -0.431101664 | 3.55138001  | 0.480228371 | NA          | NA |
| ASV_16s_19962 | 0.106218467 | -0.431101664 | 3.55138001  | 0.480228371 | NA          | NA |
| ASV_16s_19963 | 0.106218467 | -0.431101664 | 3.55138001  | 0.480228371 | NA          | NA |
| ASV_16s_19964 | 0.106218467 | -0.431101664 | 3.55138001  | 0.480228371 | NA          | NA |
| ASV_16s_19965 | 0.106218467 | -0.431101664 | 3.55138001  | 0.480228371 | NA          | NA |
| ASV_16s_19966 | 0.106218467 | -0.431101664 | 3.55138001  | 0.480228371 | NA          | NA |
| ASV_16s_19967 | 0.106218467 | -0.431101664 | 3.55138001  | 0.480228371 | NA          | NA |
| ASV_16s_19968 | 0.106218467 | -0.431101664 | 3.55138001  | 0.480228371 | NA          | NA |
| ASV_16s_19969 | 0.106218467 | -0.431101664 | 3.55138001  | 0.480228371 | NA          | NA |
| ASV_16s_19970 | 0.106218467 | -0.431101664 | 3.55138001  | 0.480228371 | NA          | NA |
| ASV_16s_19971 | 0.106218467 | -0.431101664 | 3.55138001  | 0.480228371 | NA          | NA |
| ASV_16s_19972 | 0.106218467 | -0.431101664 | 3.55138001  | 0.480228371 | NA          | NA |
| ASV_16s_19973 | 0.135301428 | 1.067156208  | 3.551571396 | 0.370345718 | 0.9997965   | NA |
| ASV_16s_19974 | 0.033841883 | -0.146908027 | 3.55118545  | 0.137535899 | NA          | NA |
| ASV_16s_19975 | 0.034833439 | 0.052803815  | 3.551174453 | 0.210999806 | 0.999969788 | NA |
| ASV_16s_19977 | 0.118123032 | 0.00574699   | 3.551542462 | 0.662601722 | 0.998606877 | NA |
| ASV_16s_19978 | 0.108443991 | -0.096052081 | 3.551527355 | 0.566775528 | 0.999163391 | NA |
| ASV_16s_19979 | 0.11240691  | 0.536123738  | 3.551944027 | 0.458643347 | 0.999584266 | NA |
| ASV_16s_19980 | 0.108678713 | 0.063384416  | 3.551620462 | 0.566673825 | 0.999163884 | NA |
| ASV_16s_19981 | 0.141072014 | -0.480648049 | 3.551285976 | 0.544885327 | 0.999264968 | NA |
| ASV_16s_19982 | 0.130404746 | -0.171792635 | 3.551456928 | 0.478495106 | 0.999521476 | NA |
| ASV_16s_19983 | 0.113761479 | -0.386232734 | 3.551467902 | 0.525173205 | 0.999348987 | NA |
| ASV_16s_19984 | 0.118488755 | 0.007556457  | 3.551830737 | 0.509335552 | 0.999411575 | NA |
| ASV_16s_19985 | 0.119571286 | 0.261253357  | 3.551689769 | 0.625402564 | 0.998845582 | NA |
| ASV_16s_19986 | 0.142253551 | -0.486295608 | 3.551240628 | 0.564909212 | 0.9991724   | NA |
| ASV_16s_19987 | 0.137044049 | -0.485312686 | 3.551221124 | 0.561041195 | 0.999190862 | NA |
| ASV_16s_19988 | 0.144947698 | -0.504379759 | 3.551155378 | 0.589928459 | 0.999046067 | NA |
| ASV_16s_19989 | 0.143034376 | -0.497735681 | 3.551173714 | 0.584282237 | 0.999075639 | NA |
| ASV_16s_19990 | 0.147962241 | -0.505638438 | 3.551097809 | 0.615780563 | 0.998902513 | NA |
| ASV_16s_19991 | 0.113948214 | 0.018661957  | 3.551538782 | 0.43083449  | 0.999662407 | NA |
| ASV_16s_19992 | 0.110218746 | -0.038220607 | 3.551408468 | 0.488327833 | 0.999488108 | NA |
| ASV_16s_19993 | 0.128455404 | -0.421386389 | 3.551520687 | 0.490496822 | 0.99948054  | NA |
| ASV_16s_19994 | 0.143575145 | -0.475412639 | 3.551109536 | 0.617629017 | 0.998891726 | NA |
| ASV_16s_19995 | 0.115699535 | 0.137333457  | 3.551477824 | 0.593896019 | 0.99902491  | NA |



|               |             |              |             |             |             |    |
|---------------|-------------|--------------|-------------|-------------|-------------|----|
| ASV_16s_19996 | 0.11370464  | 0.293709415  | 3.551463078 | 0.577390595 | 0.999110889 | NA |
| ASV_16s_19997 | 0.177304261 | 0.718112017  | 3.551436192 | 0.864034513 | 0.996734227 | NA |
| ASV_16s_19998 | 0.112139029 | 0.669669649  | 3.551725944 | 0.515799156 | 0.99938655  | NA |
| ASV_16s_19999 | 0.14192062  | -0.009986703 | 3.55101174  | 0.633341428 | 0.998797144 | NA |
| ASV_16s_20000 | 0.141881431 | -0.407901298 | 3.55104786  | 0.649697051 | 0.998693096 | NA |
| ASV_16s_20001 | 0.127257389 | 0.233014862  | 3.551209961 | 0.727954928 | 0.998111603 | NA |
| ASV_16s_20002 | 0.11193062  | 0.329732384  | 3.551896291 | 0.42440887  | 0.999678909 | NA |
| ASV_16s_20003 | 0.178638354 | 0.720220324  | 3.551409851 | 0.868221602 | 0.996683806 | NA |
| ASV_16s_20004 | 0.138359386 | 0.013341023  | 3.551061915 | 0.626205198 | 0.998840745 | NA |
| ASV_16s_20005 | 0.141268177 | -0.38232571  | 3.551047403 | 0.656591938 | 0.998647488 | NA |
| ASV_16s_20006 | 0.136768352 | -0.377903216 | 3.551089149 | 0.636865391 | 0.998775213 | NA |
| ASV_16s_20007 | 0.137496083 | -0.360345122 | 3.55108079  | 0.644875255 | 0.998724373 | NA |
| ASV_16s_20008 | 0.134102141 | -0.340979207 | 3.551108099 | 0.634786222 | 0.998788185 | NA |
| ASV_16s_20009 | 0.092366103 | 0.600668879  | 3.551882847 | 0.506183305 | 0.999423524 | NA |
| ASV_16s_20010 | 0.103640741 | 0.331095141  | 3.551922471 | 0.248101027 | 0.999947501 | NA |
| ASV_16s_20011 | 0.119992187 | 0.308313584  | 3.5518486   | 0.424660047 | 0.999678275 | NA |
| ASV_16s_20012 | 0.146475317 | -0.290861562 | 3.55144058  | 0.732248787 | 0.998075496 | NA |
| ASV_16s_20013 | 0.146376937 | -0.27257323  | 3.551798664 | 0.423389712 | 0.999681475 | NA |
| ASV_16s_20014 | 0.136675479 | 0.544838463  | 3.551512214 | 0.449530036 | 0.999611104 | NA |
| ASV_16s_20015 | 0.139247792 | -0.285212479 | 3.551081407 | 0.663797061 | 0.998598703 | NA |
| ASV_16s_20016 | 0.14004167  | -0.285212808 | 3.551080512 | 0.666660443 | 0.998578994 | NA |
| ASV_16s_20017 | 0.14004167  | -0.285212808 | 3.551080512 | 0.666660443 | 0.998578994 | NA |
| ASV_16s_20018 | 0.12274599  | -0.091086442 | 3.551736544 | 0.225440514 | 0.999962123 | NA |
| ASV_16s_20019 | 0.146825359 | 0.34353306   | 3.551284235 | 0.510556701 | 0.999406902 | NA |
| ASV_16s_20020 | 0.139428416 | -0.224599983 | 3.551091934 | 0.669720307 | 0.998557728 | NA |
| ASV_16s_20021 | 0.133050676 | -0.224599983 | 3.551091934 | 0.64845294  | 0.998701215 | NA |
| ASV_16s_20022 | 0.145892641 | 0.147593392  | 3.551061892 | 0.650980952 | 0.998684683 | NA |
| ASV_16s_20023 | 0.130399626 | 0.679937718  | 3.551343561 | 0.620448995 | 0.998875132 | NA |
| ASV_16s_20024 | 0.140299068 | 0.524871916  | 3.551230501 | 0.676074484 | 0.998512891 | NA |
| ASV_16s_20025 | 0.137680709 | -0.165669909 | 3.5510993   | 0.668519669 | 0.998566097 | NA |
| ASV_16s_20026 | 0.137152454 | -0.108352875 | 3.551236951 | 0.578321487 | 0.999106181 | NA |
| ASV_16s_20027 | 0.139127091 | 0.682723826  | 3.551221807 | 0.656083771 | 0.998650885 | NA |
| ASV_16s_20028 | 0.136928161 | 0.310857369  | 3.551400147 | 0.534329271 | 0.99931082  | NA |
| ASV_16s_20029 | 0.138160679 | 0.314504835  | 3.551753655 | 0.485321073 | 0.999498474 | NA |
| ASV_16s_20030 | 0.134503764 | 0.168167222  | 3.550433623 | 0.555556657 | 0.99921656  | NA |
| ASV_16s_20031 | 0.136168487 | 1.216527579  | 3.551460746 | 0.347730244 | 0.999835344 | NA |
| ASV_16s_20032 | 0.134643358 | -0.002380773 | 3.5511753   | 0.652785979 | 0.998672793 | NA |
| ASV_16s_20033 | 0.15249074  | -0.735635342 | 3.551205642 | 0.410600556 | 0.999712483 | NA |
| ASV_16s_20034 | 0.116219165 | 0.369433564  | 3.551145856 | 0.567914988 | 0.999157858 | NA |
| ASV_16s_20035 | 0.115410708 | 0.701986344  | 3.551323283 | 0.364635401 | 0.999806847 | NA |
| ASV_16s_20036 | 0.134109301 | 0.861346108  | 3.551502672 | 0.47035444  | 0.999547954 | NA |
| ASV_16s_20037 | 0.145382282 | 0.48072319   | 3.551047411 | 0.690025206 | NA          | NA |
| ASV_16s_20038 | 0.138724583 | 0.032399029  | 3.551876685 | 0.334564183 | 0.999855417 | NA |
| ASV_16s_20039 | 0.13728654  | 1.323628455  | 3.551344265 | 0.283239125 | 0.999917664 | NA |
| ASV_16s_20040 | 0.145271662 | 0.258147817  | 3.550926876 | 0.486786003 | 0.999493442 | NA |
| ASV_16s_20041 | 0.121050411 | 0.223108934  | 3.551355445 | 0.231477394 | 0.99995855  | NA |
| ASV_16s_20042 | 0.117594246 | 1.034499005  | 3.551452575 | 0.460334614 | NA          | NA |
| ASV_16s_20043 | 0.117594246 | 1.034499005  | 3.551452575 | 0.460334614 | NA          | NA |
| ASV_16s_20044 | 0.117594246 | 1.034499005  | 3.551452575 | 0.460334614 | NA          | NA |
| ASV_16s_20045 | 0.121492112 | 1.261846435  | 3.551415516 | 0.292660826 | 0.999908009 | NA |
| ASV_16s_20046 | 0.148316716 | 0.682644208  | 3.551061822 | 0.715161136 | 0.998216514 | NA |
| ASV_16s_20047 | 0.132320038 | 1.07593075   | 3.551363745 | 0.49723451  | NA          | NA |
| ASV_16s_20048 | 0.132320038 | 1.07593075   | 3.551363745 | 0.49723451  | NA          | NA |
| ASV_16s_20049 | 0.121403466 | 1.045751817  | 3.551430249 | 0.470086885 | NA          | NA |
| ASV_16s_20050 | 0.121403466 | 1.045751817  | 3.551430249 | 0.470086885 | NA          | NA |
| ASV_16s_20051 | 0.121403466 | 1.045751817  | 3.551430249 | 0.470086885 | NA          | NA |
| ASV_16s_20052 | 0.121403466 | 1.045751817  | 3.551430249 | 0.470086885 | NA          | NA |
| ASV_16s_20053 | 0.121403466 | 1.045751817  | 3.551430249 | 0.470086885 | NA          | NA |
| ASV_16s_20054 | 0.115098829 | 0.338271458  | 3.551932879 | 0.489071881 | NA          | NA |
| ASV_16s_20055 | 0.13934117  | 0.346609922  | 3.55185337  | 0.546130631 | NA          | NA |
| ASV_16s_20056 | 0.15291425  | 1.060963591  | 3.551377001 | 0.457404003 | 0.999587988 | NA |
| ASV_16s_20057 | 0.203210757 | -0.351028144 | 3.55062198  | 0.929055024 | 0.995893259 | NA |
| ASV_16s_20058 | 0.154117309 | 0.351044895  | 3.551786842 | 0.57688464  | NA          | NA |
| ASV_16s_20059 | 0.201881826 | 0.373772295  | 3.551503562 | 0.688677903 | NA          | NA |
| ASV_16s_20060 | 0.145266898 | 0.347658514  | 3.551971785 | 0.302472203 | 0.999897146 | NA |
| ASV_16s_20061 | 0.089194717 | 0.329219384  | 3.551997482 | 0.414834421 | NA          | NA |
| ASV_16s_20062 | 0.089194717 | 0.329219384  | 3.551997482 | 0.414834421 | NA          | NA |

|               |             |              |             |             |             |    |
|---------------|-------------|--------------|-------------|-------------|-------------|----|
| ASV_16s_20063 | 0.120771637 | 0.340259019  | 3.551913051 | 0.503920571 | NA          | NA |
| ASV_16s_20064 | 0.120771637 | 0.340259019  | 3.551913051 | 0.503920571 | NA          | NA |
| ASV_16s_20065 | 0.120771637 | 0.340259019  | 3.551913051 | 0.503920571 | NA          | NA |
| ASV_16s_20066 | 0.141904943 | 0.740321518  | 3.551822169 | 0.433522284 | 0.999655335 | NA |
| ASV_16s_20067 | 0.162115851 | 0.354915166  | 3.551740199 | 0.59429815  | NA          | NA |
| ASV_16s_20068 | 0.218956991 | -0.378858985 | 3.550894762 | 0.788349573 | 0.99756104  | NA |
| ASV_16s_20069 | 0.174116806 | -0.697443112 | 3.550827274 | 0.401915135 | 0.999732318 | NA |
| ASV_16s_20070 | 0.149240474 | -0.498477501 | 3.55113107  | 0.571393202 | NA          | NA |
| ASV_16s_20071 | 0.183948927 | -0.962090399 | 3.550751956 | 0.34173749  | 0.999844704 | NA |
| ASV_16s_20072 | 0.089079765 | -0.351238566 | 3.551640581 | 0.421850136 | NA          | NA |
| ASV_16s_20073 | 0.149663697 | 1.392921459  | 3.551179234 | 0.318759052 | 0.999877197 | NA |
| ASV_16s_20074 | 0.174752419 | 0.494551912  | 3.550987869 | 0.742524583 | 0.997987237 | NA |
| ASV_16s_20075 | 0.132072034 | 1.113868655  | 3.55111413  | 0.438435036 | NA          | NA |
| ASV_16s_20076 | 0.132072034 | 1.113868655  | 3.55111413  | 0.438435036 | NA          | NA |
| ASV_16s_20077 | 0.132072034 | 1.113868655  | 3.55111413  | 0.438435036 | NA          | NA |
| ASV_16s_20078 | 0.103524865 | 0.465628986  | 3.551110134 | 0.564529162 | 0.999174226 | NA |
| ASV_16s_20079 | 0.068928879 | 0.90712091   | 3.551597542 | 0.263248257 | 0.999935777 | NA |
| ASV_16s_20080 | 0.068928879 | 0.90712091   | 3.551597542 | 0.263248257 | 0.999935777 | NA |
| ASV_16s_20081 | 0.095442457 | 1.007078486  | 3.551369857 | 0.342693321 | 0.999843237 | NA |
| ASV_16s_20082 | 0.11816838  | 1.077144559  | 3.551196517 | 0.404042276 | NA          | NA |
| ASV_16s_20083 | 0.11816838  | 1.077144559  | 3.551196517 | 0.404042276 | NA          | NA |
| ASV_16s_20084 | 0.11816838  | 1.077144559  | 3.551196517 | 0.404042276 | NA          | NA |
| ASV_16s_20085 | 0.11816838  | 1.077144559  | 3.551196517 | 0.404042276 | NA          | NA |
| ASV_16s_20086 | 0.11816838  | 1.077144559  | 3.551196517 | 0.404042276 | NA          | NA |
| ASV_16s_20087 | 0.150086956 | 0.037546332  | 3.55086573  | 0.761354293 | 0.997818636 | NA |
| ASV_16s_20088 | 0.135499802 | 0.363314566  | 3.551534581 | 0.475117279 | NA          | NA |
| ASV_16s_20089 | 0.135499802 | 0.363314566  | 3.551534581 | 0.475117279 | NA          | NA |
| ASV_16s_20090 | 0.135499802 | 0.363314566  | 3.551534581 | 0.475117279 | NA          | NA |
| ASV_16s_20091 | 0.123028266 | 0.357644646  | 3.551591694 | 0.447259319 | NA          | NA |
| ASV_16s_20092 | 0.123028266 | 0.357644646  | 3.551591694 | 0.447259319 | NA          | NA |
| ASV_16s_20093 | 0.123028266 | 0.357644646  | 3.551591694 | 0.447259319 | NA          | NA |
| ASV_16s_20094 | 0.123028266 | 0.357644646  | 3.551591694 | 0.447259319 | NA          | NA |
| ASV_16s_20095 | 0.123028266 | 0.357644646  | 3.551591694 | 0.447259319 | NA          | NA |
| ASV_16s_20096 | 0.101558381 | 0.347323867  | 3.551689158 | 0.39099098  | NA          | NA |
| ASV_16s_20097 | 0.101558381 | 0.347323867  | 3.551689158 | 0.39099098  | NA          | NA |
| ASV_16s_20098 | 0.101558381 | 0.347323867  | 3.551689158 | 0.39099098  | NA          | NA |
| ASV_16s_20099 | 0.101558381 | 0.347323867  | 3.551689158 | 0.39099098  | NA          | NA |
| ASV_16s_20100 | 0.173974151 | 0.379978392  | 3.551314952 | 0.55600233  | NA          | NA |
| ASV_16s_20101 | 0.173974151 | 0.379978392  | 3.551314952 | 0.55600233  | NA          | NA |
| ASV_16s_20102 | 0.109882569 | 0.350942485  | 3.551651913 | 0.413552048 | NA          | NA |
| ASV_16s_20103 | 0.109882569 | 0.350942485  | 3.551651913 | 0.413552048 | NA          | NA |
| ASV_16s_20104 | 0.109882569 | 0.350942485  | 3.551651913 | 0.413552048 | NA          | NA |
| ASV_16s_20105 | 0.164884283 | 0.086609521  | 3.550380484 | 0.891229239 | 0.996397685 | NA |
| ASV_16s_20106 | 0.038260174 | 0.339073382  | 3.551921011 | 0.174803271 | 0.999984144 | NA |
| ASV_16s_20107 | 0.038260174 | 0.339073382  | 3.551921011 | 0.174803271 | 0.999984144 | NA |
| ASV_16s_20108 | 0.132834506 | 0.194644609  | 3.55128242  | 0.631211156 | 0.998810273 | NA |
| ASV_16s_20109 | 0.061736609 | -0.270332951 | 3.551533258 | 0.267542317 | NA          | NA |
| ASV_16s_20110 | 0.151445153 | -0.508435213 | 3.550757067 | 0.508253208 | NA          | NA |
| ASV_16s_20111 | 0.172679986 | -0.529397558 | 3.550567463 | 0.550998429 | 0.999237493 | NA |
| ASV_16s_20112 | 0.091295843 | 0.068467562  | 3.550976319 | 0.305060885 | 0.999894138 | NA |
| ASV_16s_20113 | 0.074977696 | -0.326780782 | 3.551441085 | 0.313821907 | NA          | NA |
| ASV_16s_20114 | 0.074977696 | -0.326780782 | 3.551441085 | 0.313821907 | NA          | NA |
| ASV_16s_20115 | 0.074977696 | -0.326780782 | 3.551441085 | 0.313821907 | NA          | NA |
| ASV_16s_20116 | 0.074977696 | -0.326780782 | 3.551441085 | 0.313821907 | NA          | NA |
| ASV_16s_20117 | 0.068715445 | -0.301011432 | 3.55148572  | 0.292428132 | NA          | NA |
| ASV_16s_20118 | 0.054473272 | 0.841269116  | 3.551729533 | 0.214741713 | 0.999967917 | NA |
| ASV_16s_20119 | 0.134776678 | 1.12059327   | 3.551099699 | 0.44491168  | NA          | NA |
| ASV_16s_20120 | 0.123028266 | -0.078141296 | 3.550958316 | 0.706320651 | NA          | NA |
| ASV_16s_20121 | 0.123028266 | -0.078141296 | 3.550958316 | 0.706320651 | NA          | NA |
| ASV_16s_20122 | 0.123028266 | -0.078141296 | 3.550958316 | 0.706320651 | NA          | NA |
| ASV_16s_20123 | 0.123028266 | -0.078141296 | 3.550958316 | 0.706320651 | NA          | NA |
| ASV_16s_20124 | 0.123028266 | -0.078141296 | 3.550958316 | 0.706320651 | NA          | NA |
| ASV_16s_20125 | 0.123028266 | -0.078141296 | 3.550958316 | 0.706320651 | NA          | NA |
| ASV_16s_20126 | 0.123028266 | -0.078141296 | 3.550958316 | 0.706320651 | NA          | NA |
| ASV_16s_20127 | 0.104907602 | -0.077886141 | 3.551034382 | 0.637169626 | NA          | NA |
| ASV_16s_20128 | 0.104907602 | -0.077886141 | 3.551034382 | 0.637169626 | NA          | NA |
| ASV_16s_20129 | 0.104907602 | -0.077886141 | 3.551034382 | 0.637169626 | NA          | NA |

|               |             |              |             |             |             |    |
|---------------|-------------|--------------|-------------|-------------|-------------|----|
| ASV_16s_20130 | 0.104907602 | -0.077886141 | 3.551034382 | 0.637169626 | NA          | NA |
| ASV_16s_20131 | 0.104907602 | -0.077886141 | 3.551034382 | 0.637169626 | NA          | NA |
| ASV_16s_20132 | 0.104907602 | -0.077886141 | 3.551034382 | 0.637169626 | NA          | NA |
| ASV_16s_20133 | 0.104907602 | -0.077886141 | 3.551034382 | 0.637169626 | NA          | NA |
| ASV_16s_20134 | 0.104907602 | -0.077886141 | 3.551034382 | 0.637169626 | NA          | NA |
| ASV_16s_20135 | 0.104907602 | -0.077886141 | 3.551034382 | 0.637169626 | NA          | NA |
| ASV_16s_20136 | 0.072288833 | 0.220235474  | 3.55097655  | 0.334067817 | 0.999856139 | NA |
| ASV_16s_20137 | 0.072995744 | 0.220232562  | 3.550972701 | 0.337518133 | 0.99985107  | NA |
| ASV_16s_20138 | 0.0733492   | 0.220231126  | 3.550970805 | 0.339236686 | 0.999848499 | NA |
| ASV_16s_20139 | 0.073702655 | 0.220229704  | 3.550968926 | 0.340950862 | 0.999845905 | NA |
| ASV_16s_20140 | 0.074409567 | 0.220226767  | 3.550965219 | 0.344365901 | 0.999840645 | NA |
| ASV_16s_20141 | 0.078100083 | 0.220213101  | 3.550946961 | 0.36191906  | NA          | NA |
| ASV_16s_20142 | 0.078100083 | 0.220213101  | 3.550946961 | 0.36191906  | NA          | NA |
| ASV_16s_20143 | 0.078100083 | 0.220213101  | 3.550946961 | 0.36191906  | NA          | NA |
| ASV_16s_20144 | 0.078100083 | 0.220213101  | 3.550946961 | 0.36191906  | NA          | NA |
| ASV_16s_20145 | 0.125571779 | 0.310954753  | 3.551108146 | 0.695906294 | NA          | NA |
| ASV_16s_20146 | 0.125571779 | 0.310954753  | 3.551108146 | 0.695906294 | NA          | NA |
| ASV_16s_20147 | 0.13329588  | 0.310952816  | 3.551078222 | 0.721566552 | NA          | NA |
| ASV_16s_20148 | 0.13329588  | 0.310952816  | 3.551078222 | 0.721566552 | NA          | NA |
| ASV_16s_20149 | 0.13329588  | 0.310952816  | 3.551078222 | 0.721566552 | NA          | NA |
| ASV_16s_20150 | 0.116227959 | 0.310957433  | 3.551149614 | 0.661949161 | NA          | NA |
| ASV_16s_20151 | 0.132873968 | 0.310952916  | 3.551079768 | 0.720335417 | NA          | NA |
| ASV_16s_20152 | 0.132873968 | 0.310952916  | 3.551079768 | 0.720335417 | NA          | NA |
| ASV_16s_20153 | 0.082272274 | 0.595606468  | 3.55088352  | 0.328927377 | NA          | NA |
| ASV_16s_20154 | 0.082272274 | 0.595606468  | 3.55088352  | 0.328927377 | NA          | NA |
| ASV_16s_20155 | 0.082272274 | 0.595606468  | 3.55088352  | 0.328927377 | NA          | NA |
| ASV_16s_20156 | 0.119219374 | 0.687146999  | 3.551109824 | 0.614440983 | NA          | NA |
| ASV_16s_20157 | 0.093582838 | -0.226879189 | 3.551615635 | 0.294153773 | 0.99990641  | NA |
| ASV_16s_20158 | 0.133154326 | 1.239124405  | 3.551374285 | 0.315021564 | 0.999881993 | NA |
| ASV_16s_20159 | 0.113589542 | 0.32521934   | 3.551997861 | 0.389548333 | 0.999758906 | NA |
| ASV_16s_20160 | 0.116645182 | 0.343861145  | 3.55189668  | 0.344242661 | 0.999840837 | NA |
| ASV_16s_20161 | 0.110358304 | -0.063534161 | 3.551231551 | 0.708397842 | 0.998270376 | NA |
| ASV_16s_20162 | 0.13626256  | 0.298146102  | 3.550916579 | 0.788048375 | 0.997564019 | NA |
| ASV_16s_20163 | 0.175756794 | 0.215722085  | 3.551197035 | 0.822733108 | 0.997204974 | NA |
| ASV_16s_20164 | 0.118011314 | -0.049443629 | 3.55131599  | 0.735534964 | 0.998047556 | NA |
| ASV_16s_20165 | 0.126134231 | 0.665897873  | 3.551755573 | 0.537679618 | 0.999296484 | NA |
| ASV_16s_20166 | 0.093713289 | 0.21235491   | 3.551507988 | 0.458306549 | 0.999585279 | NA |
| ASV_16s_20167 | 0.11798929  | -0.042319031 | 3.551370464 | 0.729875077 | 0.998095512 | NA |
| ASV_16s_20168 | 0.193190841 | -0.05933162  | 3.551551932 | 0.616650511 | 0.998897445 | NA |
| ASV_16s_20169 | 0.11432245  | 0.011921761  | 3.551496996 | 0.700652202 | 0.998330721 | NA |
| ASV_16s_20170 | 0.114817969 | 0.052100036  | 3.55150827  | 0.695547613 | 0.998369713 | NA |
| ASV_16s_20171 | 0.11792322  | 0.052100036  | 3.55150827  | 0.706633546 | 0.998284247 | NA |
| ASV_16s_20172 | 0.115313487 | 0.10700672   | 3.551514797 | 0.691599805 | 0.998399451 | NA |
| ASV_16s_20173 | 0.144121951 | 1.034522734  | 3.551396805 | 0.520615763 | NA          | NA |
| ASV_16s_20174 | 0.141425873 | 1.028479519  | 3.551415434 | 0.514127689 | 0.99939309  | NA |
| ASV_16s_20175 | 0.194367171 | 1.126015752  | 3.551069707 | 0.620123466 | NA          | NA |
| ASV_16s_20176 | 0.088443217 | 0.28570063   | 3.551781637 | 0.416093052 | 0.999699433 | NA |
| ASV_16s_20177 | 0.088443217 | 0.28570063   | 3.551781637 | 0.416093052 | 0.999699433 | NA |
| ASV_16s_20178 | 0.073646364 | 0.287357399  | 3.551835037 | 0.366121067 | 0.999804191 | NA |
| ASV_16s_20179 | 0.239622119 | -0.562600778 | 3.550371175 | 0.777670351 | NA          | NA |
| ASV_16s_20180 | 0.239622119 | -0.562600778 | 3.550371175 | 0.777670351 | NA          | NA |
| ASV_16s_20181 | 0.239622119 | -0.562600778 | 3.550371175 | 0.777670351 | NA          | NA |
| ASV_16s_20182 | 0.239622119 | -0.562600778 | 3.550371175 | 0.777670351 | NA          | NA |
| ASV_16s_20183 | 0.201186699 | 0.046382305  | 3.551201049 | 0.884864645 | 0.996478379 | NA |
| ASV_16s_20184 | 0.245285355 | 1.267292273  | 3.550810406 | 0.741519198 | NA          | NA |
| ASV_16s_20185 | 0.154503021 | 1.164483147  | 3.551000291 | 0.486169635 | NA          | NA |
| ASV_16s_20186 | 0.154503021 | 1.164483147  | 3.551000291 | 0.486169635 | NA          | NA |
| ASV_16s_20187 | 0.154503021 | 1.164483147  | 3.551000291 | 0.486169635 | NA          | NA |
| ASV_16s_20188 | 0.154503021 | 1.164483147  | 3.551000291 | 0.486169635 | NA          | NA |
| ASV_16s_20189 | 0.154503021 | 1.164483147  | 3.551000291 | 0.486169635 | NA          | NA |
| ASV_16s_20190 | 0.160481089 | 1.334594142  | 3.550998319 | 0.389738062 | 0.999758513 | NA |
| ASV_16s_20191 | 0.135133941 | 0.859243981  | 3.551211785 | 0.59503337  | 0.999018787 | NA |
| ASV_16s_20192 | 0.131502239 | 0.687020167  | 3.551218913 | 0.609527417 | 0.998938482 | NA |
| ASV_16s_20193 | 0.200659052 | 0.618277116  | 3.551516551 | 0.688686518 | 0.998421162 | NA |
| ASV_16s_20194 | 0.088040857 | -0.077555709 | 3.551133042 | 0.565855623 | NA          | NA |
| ASV_16s_20195 | 0.088040857 | -0.077555709 | 3.551133042 | 0.565855623 | NA          | NA |
| ASV_16s_20196 | 0.088040857 | -0.077555709 | 3.551133042 | 0.565855623 | NA          | NA |

|               |             |              |             |             |             |    |
|---------------|-------------|--------------|-------------|-------------|-------------|----|
| ASV_16s_20197 | 0.088040857 | -0.077555709 | 3.551133042 | 0.565855623 | NA          | NA |
| ASV_16s_20198 | 0.101721685 | -0.064353425 | 3.551267478 | 0.66334003  | 0.998601832 | NA |
| ASV_16s_20199 | 0.243633084 | -0.028983218 | 3.550853178 | 1.145488235 | NA          | NA |
| ASV_16s_20200 | 0.176114538 | 0.332789187  | 3.551012416 | 1.287632624 | 0.988767283 | NA |
| ASV_16s_20201 | 0.20500084  | 0.351832261  | 3.550466118 | 1.078230007 | 0.993465975 | NA |
| ASV_16s_20202 | 0.153809119 | 0.501472913  | 3.551034393 | 0.786878456 | 0.997575568 | NA |
| ASV_16s_20203 | 0.11615757  | -0.027001622 | 3.551214115 | 0.739859682 | NA          | NA |
| ASV_16s_20204 | 0.11615757  | -0.027001622 | 3.551214115 | 0.739859682 | NA          | NA |
| ASV_16s_20205 | 0.11615757  | -0.027001622 | 3.551214115 | 0.739859682 | NA          | NA |
| ASV_16s_20206 | 0.132724806 | -0.073096122 | 3.550967021 | 0.764596357 | NA          | NA |
| ASV_16s_20207 | 0.132724806 | -0.073096122 | 3.550967021 | 0.764596357 | NA          | NA |
| ASV_16s_20208 | 0.132724806 | -0.073096122 | 3.550967021 | 0.764596357 | NA          | NA |
| ASV_16s_20209 | 0.096936838 | -0.072513067 | 3.551132784 | 0.628581077 | NA          | NA |
| ASV_16s_20210 | 0.096936838 | -0.072513067 | 3.551132784 | 0.628581077 | NA          | NA |
| ASV_16s_20211 | 0.096936838 | -0.072513067 | 3.551132784 | 0.628581077 | NA          | NA |
| ASV_16s_20212 | 0.096936838 | -0.072513067 | 3.551132784 | 0.628581077 | NA          | NA |
| ASV_16s_20213 | 0.096936838 | -0.072513067 | 3.551132784 | 0.628581077 | NA          | NA |
| ASV_16s_20214 | 0.096936838 | -0.072513067 | 3.551132784 | 0.628581077 | NA          | NA |
| ASV_16s_20215 | 0.096936838 | -0.072513067 | 3.551132784 | 0.628581077 | NA          | NA |
| ASV_16s_20216 | 0.127312733 | 0.321784319  | 3.551096654 | 0.774784406 | 0.997692852 | NA |
| ASV_16s_20217 | 0.095195044 | -0.072473676 | 3.551143999 | 0.621208984 | NA          | NA |
| ASV_16s_20218 | 0.095195044 | -0.072473676 | 3.551143999 | 0.621208984 | NA          | NA |
| ASV_16s_20219 | 0.095195044 | -0.072473676 | 3.551143999 | 0.621208984 | NA          | NA |
| ASV_16s_20220 | 0.095195044 | -0.072473676 | 3.551143999 | 0.621208984 | NA          | NA |
| ASV_16s_20221 | 0.095195044 | -0.072473676 | 3.551143999 | 0.621208984 | NA          | NA |
| ASV_16s_20222 | 0.102989995 | 0.08612062   | 3.551149736 | 0.63895675  | NA          | NA |
| ASV_16s_20223 | 0.160658487 | -0.073372589 | 3.550888636 | 0.847099295 | NA          | NA |
| ASV_16s_20224 | 0.118114277 | -0.072900204 | 3.551022662 | 0.712434753 | NA          | NA |
| ASV_16s_20225 | 0.118114277 | -0.072900204 | 3.551022662 | 0.712434753 | NA          | NA |
| ASV_16s_20226 | 0.118114277 | -0.072900204 | 3.551022662 | 0.712434753 | NA          | NA |
| ASV_16s_20227 | 0.118114277 | -0.072900204 | 3.551022662 | 0.712434753 | NA          | NA |
| ASV_16s_20228 | 0.118114277 | -0.072900204 | 3.551022662 | 0.712434753 | NA          | NA |
| ASV_16s_20229 | 0.118114277 | -0.072900204 | 3.551022662 | 0.712434753 | NA          | NA |
| ASV_16s_20230 | 0.145583201 | 0.359996209  | 3.551026692 | 0.826354492 | 0.997165602 | NA |
| ASV_16s_20231 | 0.13250355  | 0.360241503  | 3.551357499 | 0.780871224 | NA          | NA |
| ASV_16s_20232 | 0.13250355  | 0.360241503  | 3.551357499 | 0.780871224 | NA          | NA |
| ASV_16s_20233 | 0.13250355  | 0.360241503  | 3.551357499 | 0.780871224 | NA          | NA |
| ASV_16s_20234 | 0.13250355  | 0.360241503  | 3.551357499 | 0.780871224 | NA          | NA |
| ASV_16s_20235 | 0.181932214 | 0.360304154  | 3.551152162 | 0.932018647 | 0.995851915 | NA |
| ASV_16s_20236 | 0.132214451 | 0.339248002  | 3.55176535  | 0.570191782 | 0.999146729 | NA |
| ASV_16s_20237 | 0.13250355  | 0.360241503  | 3.551357499 | 0.780871224 | NA          | NA |
| ASV_16s_20238 | 0.117791078 | 0.360212851  | 3.551451626 | 0.729324349 | NA          | NA |
| ASV_16s_20239 | 0.117791078 | 0.360212851  | 3.551451626 | 0.729324349 | NA          | NA |
| ASV_16s_20240 | 0.117791078 | 0.360212851  | 3.551451626 | 0.729324349 | NA          | NA |
| ASV_16s_20241 | 0.117791078 | 0.360212851  | 3.551451626 | 0.729324349 | NA          | NA |
| ASV_16s_20242 | 0.117791078 | 0.360212851  | 3.551451626 | 0.729324349 | NA          | NA |
| ASV_16s_20243 | 0.117791078 | 0.360212851  | 3.551451626 | 0.729324349 | NA          | NA |
| ASV_16s_20244 | 0.117791078 | 0.360212851  | 3.551451626 | 0.729324349 | NA          | NA |
| ASV_16s_20245 | 0.117791078 | 0.360212851  | 3.551451626 | 0.729324349 | NA          | NA |
| ASV_16s_20246 | 0.117791078 | 0.360212851  | 3.551451626 | 0.729324349 | NA          | NA |
| ASV_16s_20247 | 0.117791078 | 0.360212851  | 3.551451626 | 0.729324349 | NA          | NA |
| ASV_16s_20248 | 0.117791078 | 0.360212851  | 3.551451626 | 0.729324349 | NA          | NA |
| ASV_16s_20249 | 0.117791078 | 0.360212851  | 3.551451626 | 0.729324349 | NA          | NA |
| ASV_16s_20250 | 0.117791078 | 0.360212851  | 3.551451626 | 0.729324349 | NA          | NA |
| ASV_16s_20251 | 0.117791078 | 0.360212851  | 3.551451626 | 0.729324349 | NA          | NA |
| ASV_16s_20252 | 0.117791078 | 0.360212851  | 3.551451626 | 0.729324349 | NA          | NA |
| ASV_16s_20253 | 0.117791078 | 0.360212851  | 3.551451626 | 0.729324349 | NA          | NA |
| ASV_16s_20254 | 0.152621262 | 0.315939948  | 3.551056834 | 0.802219646 | NA          | NA |
| ASV_16s_20255 | 0.152621262 | 0.315939948  | 3.551056834 | 0.802219646 | NA          | NA |
| ASV_16s_20256 | 0.142377533 | 0.315939999  | 3.551090367 | 0.769791507 | 0.997740158 | NA |
| ASV_16s_20257 | 0.134410188 | 0.315940044  | 3.551119943 | 0.744745045 | 0.99796782  | NA |
| ASV_16s_20258 | 0.132133803 | 0.315940058  | 3.551129041 | 0.737648025 | 0.998029449 | NA |
| ASV_16s_20259 | 0.131925352 | 0.315940059  | 3.551129873 | 0.740360006 | NA          | NA |
| ASV_16s_20260 | 0.131925352 | 0.315940059  | 3.551129873 | 0.740360006 | NA          | NA |
| ASV_16s_20261 | 0.131925352 | 0.315940059  | 3.551129873 | 0.740360006 | NA          | NA |
| ASV_16s_20262 | 0.131925352 | 0.315940059  | 3.551129873 | 0.740360006 | NA          | NA |
| ASV_16s_20263 | 0.131925352 | 0.315940059  | 3.551129873 | 0.740360006 | NA          | NA |

|               |             |             |             |             |             |    |
|---------------|-------------|-------------|-------------|-------------|-------------|----|
| ASV_16s_20264 | 0.126108027 | 0.315940098 | 3.551154682 | 0.719677675 | 0.998179932 | NA |
| ASV_16s_20265 | 0.125765831 | 0.3159401   | 3.551156212 | 0.718542585 | 0.998189172 | NA |
| ASV_16s_20266 | 0.125765831 | 0.3159401   | 3.551156212 | 0.718542585 | 0.998189172 | NA |
| ASV_16s_20267 | 0.148193023 | 0.315939969 | 3.551070853 | 0.787165987 | 0.997572733 | NA |
| ASV_16s_20268 | 0.141901834 | 0.315940002 | 3.551092114 | 0.767394215 | 0.997762643 | NA |
| ASV_16s_20269 | 0.123028266 | 0.315940119 | 3.551168755 | 0.709618104 | NA          | NA |
| ASV_16s_20270 | 0.123028266 | 0.315940119 | 3.551168755 | 0.709618104 | NA          | NA |
| ASV_16s_20271 | 0.123028266 | 0.315940119 | 3.551168755 | 0.709618104 | NA          | NA |
| ASV_16s_20272 | 0.123028266 | 0.315940119 | 3.551168755 | 0.709618104 | NA          | NA |
| ASV_16s_20273 | 0.123028266 | 0.315940119 | 3.551168755 | 0.709618104 | NA          | NA |
| ASV_16s_20274 | 0.123028266 | 0.315940119 | 3.551168755 | 0.709618104 | NA          | NA |
| ASV_16s_20275 | 0.123028266 | 0.315940119 | 3.551168755 | 0.709618104 | NA          | NA |
| ASV_16s_20276 | 0.123028266 | 0.315940119 | 3.551168755 | 0.709618104 | NA          | NA |
| ASV_16s_20277 | 0.123028266 | 0.315940119 | 3.551168755 | 0.709618104 | NA          | NA |
| ASV_16s_20278 | 0.123028266 | 0.315940119 | 3.551168755 | 0.709618104 | NA          | NA |
| ASV_16s_20279 | 0.145979262 | 0.614690079 | 3.550525364 | 0.627132219 | 0.998835142 | NA |
| ASV_16s_20280 | 0.123028266 | 0.526949297 | 3.551104077 | 0.924864736 | 0.995951259 | NA |
| ASV_16s_20281 | 0.203484961 | 1.078086249 | 3.550843368 | 0.667270156 | 0.998574773 | NA |
| ASV_16s_20282 | 0.172287643 | 0.978740926 | 3.551095012 | 0.636671363 | 0.998776428 | NA |
| ASV_16s_20283 | 0.192329494 | 0.733682879 | 3.551134143 | 0.894710594 | NA          | NA |
| ASV_16s_20284 | 0.192329494 | 0.733682879 | 3.551134143 | 0.894710594 | NA          | NA |
| ASV_16s_20285 | 0.170846854 | 0.733443472 | 3.551203801 | 0.834017475 | 0.997081097 | NA |
| ASV_16s_20286 | 0.179815634 | 0.733550473 | 3.551172659 | 0.859404851 | 0.996789392 | NA |
| ASV_16s_20287 | 0.162751279 | 0.733337729 | 3.55123459  | 0.812487825 | NA          | NA |
| ASV_16s_20288 | 0.162751279 | 0.733337729 | 3.55123459  | 0.812487825 | NA          | NA |
| ASV_16s_20289 | 0.162751279 | 0.733337729 | 3.55123459  | 0.812487825 | NA          | NA |
| ASV_16s_20290 | 0.162751279 | 0.733337729 | 3.55123459  | 0.812487825 | NA          | NA |
| ASV_16s_20291 | 0.162751279 | 0.733337729 | 3.55123459  | 0.812487825 | NA          | NA |
| ASV_16s_20292 | 0.162751279 | 0.733337729 | 3.55123459  | 0.812487825 | NA          | NA |
| ASV_16s_20293 | 0.162751279 | 0.733337729 | 3.55123459  | 0.812487825 | NA          | NA |
| ASV_16s_20294 | 0.162751279 | 0.733337729 | 3.55123459  | 0.812487825 | NA          | NA |
| ASV_16s_20295 | 0.080619768 | 0.684906799 | 3.551655714 | 0.525530078 | NA          | NA |
| ASV_16s_20296 | 0.080619768 | 0.684906799 | 3.551655714 | 0.525530078 | NA          | NA |
| ASV_16s_20297 | 0.080619768 | 0.684906799 | 3.551655714 | 0.525530078 | NA          | NA |
| ASV_16s_20298 | 0.080619768 | 0.684906799 | 3.551655714 | 0.525530078 | NA          | NA |
| ASV_16s_20299 | 0.080619768 | 0.684906799 | 3.551655714 | 0.525530078 | NA          | NA |
| ASV_16s_20300 | 0.080619768 | 0.684906799 | 3.551655714 | 0.525530078 | NA          | NA |
| ASV_16s_20301 | 0.15130596  | 0.692510208 | 3.551041335 | 0.741359028 | NA          | NA |
| ASV_16s_20302 | 0.15130596  | 0.692510208 | 3.551041335 | 0.741359028 | NA          | NA |
| ASV_16s_20303 | 0.161379738 | 0.692613093 | 3.551011044 | 0.768206077 | 0.997755045 | NA |
| ASV_16s_20304 | 0.131729095 | 0.692265795 | 3.551113369 | 0.67869994  | 0.998494097 | NA |
| ASV_16s_20305 | 0.127378681 | 0.692201458 | 3.551132345 | 0.665393865 | 0.998587734 | NA |
| ASV_16s_20306 | 0.170680892 | 0.692696075 | 3.550986226 | 0.792907325 | 0.997515664 | NA |
| ASV_16s_20307 | 0.155599182 | 0.692555678 | 3.551027946 | 0.752734783 | NA          | NA |
| ASV_16s_20308 | 0.155599182 | 0.692555678 | 3.551027946 | 0.752734783 | NA          | NA |
| ASV_16s_20309 | 0.155599182 | 0.692555678 | 3.551027946 | 0.752734783 | NA          | NA |
| ASV_16s_20310 | 0.155599182 | 0.692555678 | 3.551027946 | 0.752734783 | NA          | NA |
| ASV_16s_20311 | 0.155599182 | 0.692555678 | 3.551027946 | 0.752734783 | NA          | NA |
| ASV_16s_20312 | 0.155599182 | 0.692555678 | 3.551027946 | 0.752734783 | NA          | NA |
| ASV_16s_20313 | 0.155599182 | 0.692555678 | 3.551027946 | 0.752734783 | NA          | NA |
| ASV_16s_20314 | 0.155599182 | 0.692555678 | 3.551027946 | 0.752734783 | NA          | NA |
| ASV_16s_20315 | 0.155599182 | 0.692555678 | 3.551027946 | 0.752734783 | NA          | NA |
| ASV_16s_20316 | 0.123028266 | 0.692132655 | 3.551152645 | 0.652243155 | NA          | NA |
| ASV_16s_20317 | 0.123028266 | 0.692132655 | 3.551152645 | 0.652243155 | NA          | NA |
| ASV_16s_20318 | 0.123028266 | 0.692132655 | 3.551152645 | 0.652243155 | NA          | NA |
| ASV_16s_20319 | 0.123028266 | 0.692132655 | 3.551152645 | 0.652243155 | NA          | NA |
| ASV_16s_20320 | 0.123028266 | 0.692132655 | 3.551152645 | 0.652243155 | NA          | NA |
| ASV_16s_20321 | 0.123028266 | 0.692132655 | 3.551152645 | 0.652243155 | NA          | NA |
| ASV_16s_20322 | 0.123028266 | 0.692132655 | 3.551152645 | 0.652243155 | NA          | NA |
| ASV_16s_20323 | 0.145223174 | 0.692441053 | 3.551061707 | 0.717410297 | 0.998198358 | NA |
| ASV_16s_20324 | 0.147304301 | 0.692465284 | 3.551054568 | 0.723618493 | 0.998147608 | NA |
| ASV_16s_20325 | 0.149662155 | 0.692491932 | 3.551046718 | 0.730624927 | 0.998089204 | NA |
| ASV_16s_20326 | 0.180735026 | 0.692779059 | 3.550962232 | 0.821419772 | NA          | NA |
| ASV_16s_20327 | 0.180735026 | 0.692779059 | 3.550962232 | 0.821419772 | NA          | NA |
| ASV_16s_20328 | 0.180596662 | 0.692777997 | 3.550962544 | 0.821033073 | 0.997223332 | NA |
| ASV_16s_20329 | 0.180546348 | 0.692777611 | 3.550962657 | 0.820892477 | 0.997224847 | NA |
| ASV_16s_20330 | 0.180407985 | 0.692776547 | 3.55096297  | 0.8205059   | NA          | NA |

|               |             |              |             |             |             |    |
|---------------|-------------|--------------|-------------|-------------|-------------|----|
| ASV_16s_20331 | 0.101990539 | 0.298113797  | 3.551922166 | 0.452334297 | NA          | NA |
| ASV_16s_20332 | 0.101990539 | 0.298113797  | 3.551922166 | 0.452334297 | NA          | NA |
| ASV_16s_20333 | 0.101990539 | 0.298113797  | 3.551922166 | 0.452334297 | NA          | NA |
| ASV_16s_20334 | 0.101990539 | 0.298113797  | 3.551922166 | 0.452334297 | NA          | NA |
| ASV_16s_20335 | 0.101990539 | 0.298113797  | 3.551922166 | 0.452334297 | NA          | NA |
| ASV_16s_20336 | 0.101990539 | 0.298113797  | 3.551922166 | 0.452334297 | NA          | NA |
| ASV_16s_20337 | 0.101990539 | 0.298113797  | 3.551922166 | 0.452334297 | NA          | NA |
| ASV_16s_20338 | 0.101990539 | 0.298113797  | 3.551922166 | 0.452334297 | NA          | NA |
| ASV_16s_20339 | 0.101990539 | 0.298113797  | 3.551922166 | 0.452334297 | NA          | NA |
| ASV_16s_20340 | 0.101990539 | 0.298113797  | 3.551922166 | 0.452334297 | NA          | NA |
| ASV_16s_20341 | 0.101990539 | 0.298113797  | 3.551922166 | 0.452334297 | NA          | NA |
| ASV_16s_20342 | 0.101990539 | 0.298113797  | 3.551922166 | 0.452334297 | NA          | NA |
| ASV_16s_20343 | 0.101990539 | 0.298113797  | 3.551922166 | 0.452334297 | NA          | NA |
| ASV_16s_20344 | 0.101990539 | 0.298113797  | 3.551922166 | 0.452334297 | NA          | NA |
| ASV_16s_20345 | 0.101990539 | 0.298113797  | 3.551922166 | 0.452334297 | NA          | NA |
| ASV_16s_20346 | 0.101990539 | 0.298113797  | 3.551922166 | 0.452334297 | NA          | NA |
| ASV_16s_20347 | 0.101990539 | 0.298113797  | 3.551922166 | 0.452334297 | NA          | NA |
| ASV_16s_20348 | 0.103544052 | 0.066134107  | 3.551727258 | 0.60380506  | 0.998970695 | NA |
| ASV_16s_20349 | 0.10406189  | 0.00311402   | 3.551657106 | 0.631488561 | 0.998808569 | NA |
| ASV_16s_20350 | 0.10406189  | 0.00311402   | 3.551657106 | 0.631488561 | 0.998808569 | NA |
| ASV_16s_20351 | 0.102036172 | 0.0158704    | 3.551682253 | 0.621827499 | 0.998866961 | NA |
| ASV_16s_20352 | 0.115945501 | -0.090349596 | 3.551488169 | 0.699641566 | 0.998338489 | NA |
| ASV_16s_20353 | 0.121276503 | -0.115169166 | 3.5514199   | 0.727533123 | 0.998115125 | NA |
| ASV_16s_20354 | 0.104579728 | -0.055177738 | 3.551594936 | 0.650308421 | 0.998689094 | NA |
| ASV_16s_20355 | 0.104579728 | -0.055177738 | 3.551594936 | 0.650308421 | 0.998689094 | NA |
| ASV_16s_20356 | 0.104579728 | -0.055177738 | 3.551594936 | 0.650308421 | 0.998689094 | NA |
| ASV_16s_20357 | 0.104579728 | -0.055177738 | 3.551594936 | 0.650308421 | 0.998689094 | NA |
| ASV_16s_20358 | 0.109771816 | -0.08316115  | 3.551535931 | 0.67447078  | 0.998524294 | NA |
| ASV_16s_20359 | 0.104579728 | -0.055177738 | 3.551594936 | 0.650308421 | 0.998689094 | NA |
| ASV_16s_20360 | 0.104579728 | -0.055177738 | 3.551594936 | 0.650308421 | 0.998689094 | NA |
| ASV_16s_20361 | 0.104838647 | -0.082799532 | 3.551568151 | 0.656169059 | 0.998650315 | NA |
| ASV_16s_20362 | 0.107421912 | -0.096242164 | 3.551539993 | 0.667631524 | 0.998572268 | NA |
| ASV_16s_20363 | 0.104838647 | -0.082799532 | 3.551568151 | 0.656169059 | 0.998650315 | NA |
| ASV_16s_20364 | 0.104838647 | -0.082799532 | 3.551568151 | 0.656169059 | 0.998650315 | NA |
| ASV_16s_20365 | 0.104838647 | -0.082799532 | 3.551568151 | 0.656169059 | 0.998650315 | NA |
| ASV_16s_20366 | 0.104838647 | -0.082799532 | 3.551568151 | 0.656169059 | 0.998650315 | NA |
| ASV_16s_20367 | 0.105097565 | -0.109625171 | 3.551544503 | 0.659548949 | 0.998627606 | NA |
| ASV_16s_20368 | 0.102058988 | -0.094005922 | 3.551577686 | 0.646853512 | 0.998711602 | NA |
| ASV_16s_20369 | 0.120597155 | -0.180691513 | 3.551368331 | 0.728981476 | 0.998103012 | NA |
| ASV_16s_20370 | 0.104084706 | -0.104493845 | 3.551555323 | 0.655275758 | 0.998656275 | NA |
| ASV_16s_20371 | 0.105356484 | -0.135835448 | 3.551522913 | 0.660624229 | 0.998620328 | NA |
| ASV_16s_20372 | 0.102064692 | -0.119633732 | 3.551557234 | 0.647397448 | 0.998708076 | NA |
| ASV_16s_20373 | 0.122147706 | -0.208925685 | 3.551334447 | 0.733105142 | 0.998068241 | NA |
| ASV_16s_20374 | 0.10409041  | -0.129678305 | 3.551536434 | 0.655492954 | 0.998654828 | NA |
| ASV_16s_20375 | 0.105615403 | -0.161634726 | 3.551500786 | 0.659418724 | 0.998628486 | NA |
| ASV_16s_20376 | 0.104349329 | -0.155599347 | 3.551514486 | 0.6544884   | 0.998661513 | NA |
| ASV_16s_20377 | 0.105615403 | -0.161634726 | 3.551500786 | 0.659418724 | 0.998628486 | NA |
| ASV_16s_20378 | 0.102070396 | -0.144611606 | 3.551538656 | 0.645754035 | 0.99871871  | NA |
| ASV_16s_20379 | 0.102070396 | -0.144611606 | 3.551538656 | 0.645754035 | 0.99871871  | NA |
| ASV_16s_20380 | 0.105874322 | -0.186810998 | 3.551480737 | 0.655698197 | 0.998653459 | NA |
| ASV_16s_20381 | 0.105874322 | -0.186810998 | 3.551480737 | 0.655698197 | 0.998653459 | NA |
| ASV_16s_20382 | 0.102081804 | -0.19362237  | 3.551503372 | 0.635354061 | 0.998784651 | NA |
| ASV_16s_20383 | 0.106133241 | -0.211533559 | 3.551462948 | 0.649611035 | 0.998693659 | NA |
| ASV_16s_20384 | 0.12679936  | -0.290492813 | 3.551250071 | 0.727996415 | 0.998111256 | NA |
| ASV_16s_20385 | 0.11581199  | -0.274413357 | 3.551351832 | 0.673928244 | 0.998528138 | NA |
| ASV_16s_20386 | 0.10639216  | -0.236276573 | 3.551444753 | 0.641045247 | 0.998748855 | NA |
| ASV_16s_20387 | 0.104619656 | -0.228799583 | 3.551461944 | 0.635090268 | 0.998786294 | NA |
| ASV_16s_20388 | 0.102093213 | -0.242180745 | 3.551472053 | 0.616196691 | 0.998900091 | NA |
| ASV_16s_20389 | 0.102098917 | -0.266350503 | 3.551458533 | 0.603630983 | 0.998971665 | NA |
| ASV_16s_20390 | 0.03646039  | -0.103493529 | 3.551878194 | 0.224140568 | 0.999962863 | NA |
| ASV_16s_20391 | 0.03646039  | -0.103493529 | 3.551878194 | 0.224140568 | 0.999962863 | NA |
| ASV_16s_20392 | 0.03646039  | -0.103493529 | 3.551878194 | 0.224140568 | 0.999962863 | NA |
| ASV_16s_20393 | 0.139147245 | -0.523045683 | 3.551133319 | 0.558693782 | NA          | NA |
| ASV_16s_20394 | 0.139147245 | -0.523045683 | 3.551133319 | 0.558693782 | NA          | NA |
| ASV_16s_20395 | 0.139147245 | -0.523045683 | 3.551133319 | 0.558693782 | NA          | NA |
| ASV_16s_20396 | 0.140366144 | -0.526052138 | 3.551125682 | 0.56134273  | 0.999189433 | NA |
| ASV_16s_20397 | 0.140540272 | -0.526479793 | 3.551124599 | 0.561722783 | 0.999187629 | NA |

|               |             |              |             |             |             |    |
|---------------|-------------|--------------|-------------|-------------|-------------|----|
| ASV_16s_20398 | 0.140888529 | -0.527333649 | 3.551122439 | 0.562484095 | 0.999184008 | NA |
| ASV_16s_20399 | 0.133583498 | -0.509096064 | 3.551168872 | 0.546816441 | 0.999256363 | NA |
| ASV_16s_20400 | 0.142281556 | -0.530729869 | 3.551113882 | 0.565545268 | 0.999169337 | NA |
| ASV_16s_20401 | 0.127556106 | -0.493399798 | 3.551209659 | 0.53443264  | NA          | NA |
| ASV_16s_20402 | 0.127556106 | -0.493399798 | 3.551209659 | 0.53443264  | NA          | NA |
| ASV_16s_20403 | 0.127556106 | -0.493399798 | 3.551209659 | 0.53443264  | NA          | NA |
| ASV_16s_20404 | 0.127556106 | -0.493399798 | 3.551209659 | 0.53443264  | NA          | NA |
| ASV_16s_20405 | 0.127556106 | -0.493399798 | 3.551209659 | 0.53443264  | NA          | NA |
| ASV_16s_20406 | 0.127556106 | -0.493399798 | 3.551209659 | 0.53443264  | NA          | NA |
| ASV_16s_20407 | 0.127556106 | -0.493399798 | 3.551209659 | 0.53443264  | NA          | NA |
| ASV_16s_20408 | 0.116100548 | -0.46120546  | 3.551295286 | 0.504187315 | 0.999431004 | NA |
| ASV_16s_20409 | 0.113681157 | -0.454015881 | 3.551315102 | 0.496026099 | 0.999460902 | NA |
| ASV_16s_20410 | 0.11363004  | -0.453876655 | 3.551315488 | 0.497676342 | 0.999454945 | NA |
| ASV_16s_20411 | 0.10846351  | -0.43810611  | 3.551359881 | 0.486495537 | NA          | NA |
| ASV_16s_20412 | 0.10846351  | -0.43810611  | 3.551359881 | 0.486495537 | NA          | NA |
| ASV_16s_20413 | 0.10846351  | -0.43810611  | 3.551359881 | 0.486495537 | NA          | NA |
| ASV_16s_20414 | 0.10846351  | -0.43810611  | 3.551359881 | 0.486495537 | NA          | NA |
| ASV_16s_20415 | 0.10846351  | -0.43810611  | 3.551359881 | 0.486495537 | NA          | NA |
| ASV_16s_20416 | 0.10846351  | -0.43810611  | 3.551359881 | 0.486495537 | NA          | NA |
| ASV_16s_20417 | 0.10846351  | -0.43810611  | 3.551359881 | 0.486495537 | NA          | NA |
| ASV_16s_20418 | 0.10846351  | -0.43810611  | 3.551359881 | 0.486495537 | NA          | NA |
| ASV_16s_20419 | 0.10846351  | -0.43810611  | 3.551359881 | 0.486495537 | NA          | NA |
| ASV_16s_20420 | 0.10846351  | -0.43810611  | 3.551359881 | 0.486495537 | NA          | NA |
| ASV_16s_20421 | 0.10846351  | -0.43810611  | 3.551359881 | 0.486495537 | NA          | NA |
| ASV_16s_20422 | 0.10846351  | -0.43810611  | 3.551359881 | 0.486495537 | NA          | NA |
| ASV_16s_20423 | 0.10846351  | -0.43810611  | 3.551359881 | 0.486495537 | NA          | NA |
| ASV_16s_20424 | 0.10846351  | -0.43810611  | 3.551359881 | 0.486495537 | NA          | NA |
| ASV_16s_20425 | 0.10846351  | -0.43810611  | 3.551359881 | 0.486495537 | NA          | NA |
| ASV_16s_20426 | 0.10846351  | -0.43810611  | 3.551359881 | 0.486495537 | NA          | NA |
| ASV_16s_20427 | 0.10846351  | -0.43810611  | 3.551359881 | 0.486495537 | NA          | NA |
| ASV_16s_20428 | 0.106184577 | -0.430917824 | 3.551380541 | 0.480032812 | 0.999516358 | NA |
| ASV_16s_20429 | 0.104158859 | -0.424411406 | 3.551399476 | 0.474236678 | 0.999535455 | NA |
| ASV_16s_20430 | 0.102133141 | -0.417789914 | 3.551418977 | 0.468400199 | NA          | NA |
| ASV_16s_20431 | 0.102133141 | -0.417789914 | 3.551418977 | 0.468400199 | NA          | NA |
| ASV_16s_20432 | 0.102133141 | -0.417789914 | 3.551418977 | 0.468400199 | NA          | NA |
| ASV_16s_20433 | 0.102133141 | -0.417789914 | 3.551418977 | 0.468400199 | NA          | NA |
| ASV_16s_20434 | 0.102133141 | -0.417789914 | 3.551418977 | 0.468400199 | NA          | NA |
| ASV_16s_20435 | 0.102133141 | -0.417789914 | 3.551418977 | 0.468400199 | NA          | NA |
| ASV_16s_20436 | 0.102133141 | -0.417789914 | 3.551418977 | 0.468400199 | NA          | NA |
| ASV_16s_20437 | 0.102133141 | -0.417789914 | 3.551418977 | 0.468400199 | NA          | NA |
| ASV_16s_20438 | 0.02886346  | -0.139363844 | 3.551268846 | 0.104607315 | NA          | NA |
| ASV_16s_20439 | 0.030843316 | -0.071540302 | 3.551214051 | 0.15155109  | 0.999990292 | NA |
| ASV_16s_20440 | 0.019606002 | -0.099995972 | 3.551450587 | 0.041171489 | 0.99999894  | NA |
| ASV_16s_20441 | 0.019606002 | -0.099995972 | 3.551450587 | 0.041171489 | 0.99999894  | NA |
| ASV_16s_20442 | 0.034310909 | 0.230658378  | 3.551306411 | 0.120499382 | NA          | NA |
| ASV_16s_20448 | 0.143500455 | 0.687438091  | 3.551016574 | 0.69016883  | NA          | NA |
| ASV_16s_20449 | 0.10480235  | 0.232448861  | 3.551791883 | 0.529198973 | 0.999332387 | NA |
| ASV_16s_20450 | 0.144090672 | -0.492929039 | 3.551246482 | 0.480921291 | 0.999513385 | NA |
| ASV_16s_20451 | 0.106057215 | 0.312351883  | 3.551933435 | 0.389997867 | 0.999757973 | NA |
| ASV_16s_20452 | 0.121896539 | 0.603846059  | 3.551841946 | 0.556368519 | 0.999212791 | NA |
| ASV_16s_20453 | 0.133353757 | -0.167464471 | 3.551254767 | 0.522321015 | 0.999360577 | NA |
| ASV_16s_20454 | 0.125754733 | -0.017433068 | 3.551668002 | 0.630340654 | 0.99881561  | NA |
| ASV_16s_20455 | 0.110874054 | 0.029739867  | 3.551844061 | 0.469761797 | 0.999549842 | NA |
| ASV_16s_20456 | 0.131478159 | -0.464936474 | 3.551270934 | 0.541503683 | 0.999279875 | NA |
| ASV_16s_20457 | 0.133284486 | -0.126143553 | 3.551154607 | 0.534391381 | 0.999310556 | NA |
| ASV_16s_20458 | 0.122006368 | -0.629261671 | 3.551213258 | 0.398629323 | 0.999739569 | NA |
| ASV_16s_20459 | 0.136762274 | -0.446870177 | 3.551165086 | 0.59279148  | 0.999030831 | NA |
| ASV_16s_20460 | 0.127630743 | -0.407442845 | 3.551242817 | 0.564197828 | 0.999175817 | NA |
| ASV_16s_20461 | 0.127776789 | -0.407569582 | 3.551240818 | 0.564876658 | 0.999172557 | NA |
| ASV_16s_20462 | 0.136687204 | -0.581728516 | 3.551251302 | 0.46650326  | 0.999560125 | NA |
| ASV_16s_20463 | 0.142773553 | 0.329367515  | 3.5519273   | 0.283787807 | 0.999917122 | NA |
| ASV_16s_20464 | 0.133255067 | -0.41012516  | 3.551156552 | 0.594978111 | 0.999019085 | NA |
| ASV_16s_20465 | 0.108477707 | 0.783711838  | 3.551946111 | 0.403027501 | 0.999729832 | NA |
| ASV_16s_20466 | 0.12338666  | -0.373857273 | 3.551257856 | 0.564751143 | 0.99917316  | NA |
| ASV_16s_20467 | 0.130185425 | 0.132090402  | 3.551543857 | 0.468267713 | 0.999554577 | NA |
| ASV_16s_20468 | 0.132691945 | -0.363059243 | 3.551162975 | 0.609841978 | 0.998936691 | NA |
| ASV_16s_20469 | 0.133683014 | -0.369367894 | 3.551118578 | 0.616721156 | 0.998897033 | NA |

|               |             |              |             |             |             |    |
|---------------|-------------|--------------|-------------|-------------|-------------|----|
| ASV_16s_20470 | 0.132486806 | -0.362458899 | 3.551129131 | 0.613022243 | 0.998918478 | NA |
| ASV_16s_20471 | 0.135528159 | -0.349846155 | 3.551104197 | 0.631485013 | 0.99880859  | NA |
| ASV_16s_20472 | 0.130533385 | -0.280838643 | 3.551495491 | 0.414622498 | 0.999702966 | NA |
| ASV_16s_20473 | 0.131384254 | 0.939812566  | 3.551738819 | 0.451546317 | 0.999605272 | NA |
| ASV_16s_20474 | 0.121997863 | 0.677973851  | 3.551512164 | 0.579389734 | 0.999100759 | NA |
| ASV_16s_20475 | 0.132999493 | -0.285194124 | 3.551131117 | 0.630622595 | 0.998813883 | NA |
| ASV_16s_20476 | 0.124480453 | -0.275384437 | 3.551358749 | 0.5008647   | 0.999443309 | NA |
| ASV_16s_20477 | 0.142131981 | -0.873316403 | 3.551185937 | 0.202462999 | 0.999973768 | NA |
| ASV_16s_20478 | 0.111918992 | 0.12976676   | 3.55125703  | 0.525499789 | 0.999347651 | NA |
| ASV_16s_20479 | 0.104212653 | -0.541031465 | 3.551297985 | 0.375305376 | 0.999787209 | NA |
| ASV_16s_20480 | 0.134336692 | -0.167278072 | 3.551856956 | 0.398683837 | 0.99973945  | NA |
| ASV_16s_20481 | 0.13444614  | 0.333262235  | 3.55185721  | 0.467697251 | 0.999556376 | NA |
| ASV_16s_20482 | 0.127323021 | 0.672650618  | 3.551760086 | 0.480347617 | 0.999515306 | NA |
| ASV_16s_20483 | 0.13350589  | -0.16565937  | 3.551131452 | 0.645364879 | 0.99872122  | NA |
| ASV_16s_20484 | 0.133688398 | -0.165655677 | 3.551142765 | 0.644306315 | 0.99872803  | NA |
| ASV_16s_20485 | 0.16427681  | 0.248389574  | 3.551189352 | 0.78512269  | 0.997592833 | NA |
| ASV_16s_20486 | 0.140761619 | -0.121476594 | 3.551829791 | 0.504454345 | 0.999430007 | NA |
| ASV_16s_20487 | 0.172509347 | -0.122696724 | 3.551694692 | 0.61197731  | 0.998924486 | NA |
| ASV_16s_20488 | 0.149846306 | 0.251578108  | 3.551310605 | 0.654656794 | 0.998660394 | NA |
| ASV_16s_20489 | 0.121587456 | -0.110670209 | 3.551135725 | 0.61193056  | 0.998924754 | NA |
| ASV_16s_20490 | 0.110105021 | 0.339201682  | 3.551789112 | 0.489614024 | 0.999483629 | NA |
| ASV_16s_20491 | 0.136609896 | 0.371842837  | 3.551187005 | 0.646043314 | 0.998716843 | NA |
| ASV_16s_20492 | 0.133403012 | -0.056013479 | 3.551121945 | 0.651939019 | 0.998678381 | NA |
| ASV_16s_20493 | 0.132461891 | -0.056011756 | 3.551128252 | 0.648113526 | 0.998703424 | NA |
| ASV_16s_20494 | 0.115543198 | 0.314811601  | 3.551231345 | 0.576825593 | 0.999113738 | NA |
| ASV_16s_20495 | 0.117969463 | -0.082142357 | 3.551210943 | 0.601804926 | 0.998981798 | NA |
| ASV_16s_20496 | 0.109210143 | 0.286367075  | 3.551626055 | 0.523335432 | 0.999356471 | NA |
| ASV_16s_20497 | 0.165617642 | 0.375017985  | 3.550998847 | 0.747852028 | 0.997940443 | NA |
| ASV_16s_20498 | 0.128132551 | 0.136933065  | 3.55068655  | 0.485423157 | 0.999498125 | NA |
| ASV_16s_20499 | 0.128132551 | 0.136933065  | 3.55068655  | 0.485423157 | 0.999498125 | NA |
| ASV_16s_20500 | 0.115317428 | 0.528649434  | 3.551280923 | 0.234890555 | 0.999956428 | NA |
| ASV_16s_20501 | 0.124628724 | 0.341005497  | 3.551726388 | 0.328720199 | 0.999863758 | NA |
| ASV_16s_20502 | 0.124853837 | 0.086771339  | 3.550876502 | 0.452148633 | 0.999603518 | NA |
| ASV_16s_20503 | 0.125330353 | 0.222703267  | 3.551422075 | 0.511816635 | 0.999402053 | NA |
| ASV_16s_20504 | 0.133981894 | 1.011359902  | 3.551466859 | 0.496781427 | NA          | NA |
| ASV_16s_20505 | 0.164548102 | 0.301566317  | 3.551942632 | 0.435719474 | 0.99964948  | NA |
| ASV_16s_20506 | 0.185658775 | 0.298698298  | 3.551883348 | 0.476917564 | 0.999526687 | NA |
| ASV_16s_20507 | 0.134437735 | -0.24589885  | 3.55115015  | 0.625319864 | 0.99884608  | NA |
| ASV_16s_20508 | 0.11307139  | 1.020611736  | 3.551480675 | 0.448407388 | NA          | NA |
| ASV_16s_20509 | 0.11307139  | 1.020611736  | 3.551480675 | 0.448407388 | NA          | NA |
| ASV_16s_20510 | 0.11307139  | 1.020611736  | 3.551480675 | 0.448407388 | NA          | NA |
| ASV_16s_20511 | 0.114243458 | 1.024254051  | 3.551473305 | 0.451509907 | 0.999605377 | NA |
| ASV_16s_20512 | 0.127230806 | 1.062117715  | 3.551397338 | 0.484632856 | NA          | NA |
| ASV_16s_20513 | 0.127230806 | 1.062117715  | 3.551397338 | 0.484632856 | NA          | NA |
| ASV_16s_20514 | 0.185019044 | 1.188458047  | 3.551075932 | 0.607059411 | 0.998952457 | NA |
| ASV_16s_20515 | 0.129364592 | 0.173243364  | 3.551124778 | 0.803388017 | 0.997409224 | NA |
| ASV_16s_20516 | 0.116734102 | 1.031838978  | 3.55145792  | 0.458012875 | NA          | NA |
| ASV_16s_20517 | 0.10375847  | 0.732609634  | 3.55178166  | 0.34259424  | 0.999843389 | NA |
| ASV_16s_20518 | 0.110671951 | 0.33679133   | 3.551943749 | 0.476998532 | NA          | NA |
| ASV_16s_20519 | 0.110671951 | 0.33679133   | 3.551943749 | 0.476998532 | NA          | NA |
| ASV_16s_20520 | 0.110671951 | 0.33679133   | 3.551943749 | 0.476998532 | NA          | NA |
| ASV_16s_20521 | 0.110671951 | 0.33679133   | 3.551943749 | 0.476998532 | NA          | NA |
| ASV_16s_20522 | 0.126049242 | -0.204493558 | 3.551710216 | 0.399001279 | 0.999738755 | NA |
| ASV_16s_20523 | 0.133981894 | 0.344562264  | 3.551871852 | 0.53055467  | NA          | NA |
| ASV_16s_20524 | 0.133981894 | 0.344562264  | 3.551871852 | 0.53055467  | NA          | NA |
| ASV_16s_20525 | 0.14818972  | 0.349107876  | 3.551816527 | 0.562275226 | NA          | NA |
| ASV_16s_20526 | 0.132970564 | 0.096507954  | 3.551858241 | 0.466955793 | 0.999558706 | NA |
| ASV_16s_20527 | 0.19411714  | 0.370654671  | 3.551553066 | 0.676646911 | NA          | NA |
| ASV_16s_20528 | 0.085764151 | 0.328273921  | 3.552005043 | 0.404021144 | NA          | NA |
| ASV_16s_20529 | 0.116126574 | 0.338628912  | 3.551929275 | 0.491685875 | NA          | NA |
| ASV_16s_20530 | 0.116126574 | 0.338628912  | 3.551929275 | 0.491685875 | NA          | NA |
| ASV_16s_20531 | 0.116126574 | 0.338628912  | 3.551929275 | 0.491685875 | NA          | NA |
| ASV_16s_20532 | 0.178214186 | 0.039646717  | 3.550959057 | 0.966250914 | 0.995354739 | NA |
| ASV_16s_20533 | 0.123671493 | -0.415177913 | 3.551290573 | 0.379124808 | 0.999779857 | NA |
| ASV_16s_20534 | 0.129536993 | -0.461962297 | 3.551294287 | 0.527660079 | 0.999338766 | NA |
| ASV_16s_20535 | 0.148391493 | 0.156597213  | 3.551530949 | 0.449541943 | NA          | NA |
| ASV_16s_20536 | 0.171388228 | -0.524744879 | 3.550907062 | 0.618638813 | NA          | NA |



|               |             |              |             |             |             |    |
|---------------|-------------|--------------|-------------|-------------|-------------|----|
| ASV_16s_20537 | 0.136884963 | 0.865046322  | 3.551224989 | 0.39294919  | 0.999751785 | NA |
| ASV_16s_20538 | 0.12330081  | -0.44760081  | 3.551344014 | 0.515760028 | NA          | NA |
| ASV_16s_20539 | 0.08565362  | -0.339724371 | 3.551671504 | 0.411020536 | NA          | NA |
| ASV_16s_20540 | 0.112115151 | -0.41957139  | 3.551441215 | 0.487585945 | NA          | NA |
| ASV_16s_20541 | 0.112115151 | -0.41957139  | 3.551441215 | 0.487585945 | NA          | NA |
| ASV_16s_20542 | 0.235851303 | 1.257750005  | 3.550850765 | 0.730259068 | NA          | NA |
| ASV_16s_20543 | 0.12699234  | 1.100808257  | 3.551142713 | 0.425955884 | NA          | NA |
| ASV_16s_20544 | 0.12699234  | 1.100808257  | 3.551142713 | 0.425955884 | NA          | NA |
| ASV_16s_20545 | 0.149496968 | 1.154078719  | 3.551025242 | 0.471128498 | 0.999545481 | NA |
| ASV_16s_20546 | 0.066277768 | 0.895672295  | 3.551622008 | 0.254595035 | 0.999942676 | NA |
| ASV_16s_20547 | 0.113623443 | 1.06420467   | 3.551227074 | 0.392300345 | NA          | NA |
| ASV_16s_20548 | 0.113623443 | 1.06420467   | 3.551227074 | 0.392300345 | NA          | NA |
| ASV_16s_20549 | 0.113623443 | 1.06420467   | 3.551227074 | 0.392300345 | NA          | NA |
| ASV_16s_20550 | 0.113623443 | 1.06420467   | 3.551227074 | 0.392300345 | NA          | NA |
| ASV_16s_20551 | 0.113623443 | 1.06420467   | 3.551227074 | 0.392300345 | NA          | NA |
| ASV_16s_20552 | 0.14362299  | 0.366589071  | 3.55148918  | 0.487882797 | NA          | NA |
| ASV_16s_20553 | 0.13935588  | 0.364998726  | 3.55151359  | 0.478646803 | 0.999520973 | NA |
| ASV_16s_20554 | 0.130288271 | 0.361000617  | 3.551561079 | 0.459739286 | NA          | NA |
| ASV_16s_20555 | 0.130288271 | 0.361000617  | 3.551561079 | 0.459739286 | NA          | NA |
| ASV_16s_20556 | 0.11829641  | 0.355274718  | 3.551612528 | 0.435245306 | NA          | NA |
| ASV_16s_20557 | 0.11829641  | 0.355274718  | 3.551612528 | 0.435245306 | NA          | NA |
| ASV_16s_20558 | 0.11829641  | 0.355274718  | 3.551612528 | 0.435245306 | NA          | NA |
| ASV_16s_20559 | 0.11829641  | 0.355274718  | 3.551612528 | 0.435245306 | NA          | NA |
| ASV_16s_20560 | 0.11829641  | 0.355274718  | 3.551612528 | 0.435245306 | NA          | NA |
| ASV_16s_20561 | 0.11829641  | 0.355274718  | 3.551612528 | 0.435245306 | NA          | NA |
| ASV_16s_20562 | 0.09765229  | 0.346543999  | 3.551701438 | 0.379870463 | NA          | NA |
| ASV_16s_20563 | 0.09765229  | 0.346543999  | 3.551701438 | 0.379870463 | NA          | NA |
| ASV_16s_20564 | 0.105656316 | 0.348628182  | 3.55167366  | 0.402176752 | NA          | NA |
| ASV_16s_20565 | 0.105656316 | 0.348628182  | 3.55167366  | 0.402176752 | NA          | NA |
| ASV_16s_20566 | 0.105656316 | 0.348628182  | 3.55167366  | 0.402176752 | NA          | NA |
| ASV_16s_20567 | 0.036788629 | 0.338633959  | 3.551927905 | 0.168622443 | 0.999985987 | NA |
| ASV_16s_20568 | 0.036788629 | 0.338633959  | 3.551927905 | 0.168622443 | 0.999985987 | NA |
| ASV_16s_20569 | 0.036788629 | 0.338633959  | 3.551927905 | 0.168622443 | 0.999985987 | NA |
| ASV_16s_20570 | 0.059362124 | -0.259234926 | 3.551550445 | 0.258762689 | 0.999939421 | NA |
| ASV_16s_20571 | 0.14562034  | -0.501024804 | 3.550813991 | 0.493431203 | NA          | NA |
| ASV_16s_20572 | 0.14562034  | -0.501024804 | 3.550813991 | 0.493431203 | NA          | NA |
| ASV_16s_20573 | 0.187841296 | -0.536059156 | 3.550431293 | 0.589949351 | NA          | NA |
| ASV_16s_20574 | 0.193881324 | -0.538476524 | 3.550382306 | 0.604961377 | NA          | NA |
| ASV_16s_20575 | 0.17935693  | -0.532397053 | 3.550504982 | 0.569384044 | NA          | NA |
| ASV_16s_20576 | 0.17935693  | -0.532397053 | 3.550504982 | 0.569384044 | NA          | NA |
| ASV_16s_20577 | 0.097792172 | -0.391839753 | 3.551297497 | 0.361336697 | 0.999812655 | NA |
| ASV_16s_20578 | 0.066072543 | -0.289571023 | 3.551504214 | 0.283096082 | NA          | NA |
| ASV_16s_20579 | 0.052378146 | 0.830629855  | 3.551751251 | 0.207344832 | 0.99997154  | NA |
| ASV_16s_20580 | 0.12959296  | 1.107515388  | 3.551127938 | 0.432323407 | NA          | NA |
| ASV_16s_20581 | 0.11829641  | -0.078082167 | 3.550976003 | 0.688843798 | NA          | NA |
| ASV_16s_20582 | 0.11829641  | -0.078082167 | 3.550976003 | 0.688843798 | NA          | NA |
| ASV_16s_20583 | 0.11829641  | -0.078082167 | 3.550976003 | 0.688843798 | NA          | NA |
| ASV_16s_20584 | 0.11829641  | -0.078082167 | 3.550976003 | 0.688843798 | NA          | NA |
| ASV_16s_20585 | 0.11829641  | -0.078082167 | 3.550976003 | 0.688843798 | NA          | NA |
| ASV_16s_20586 | 0.11829641  | -0.078082167 | 3.550976003 | 0.688843798 | NA          | NA |
| ASV_16s_20587 | 0.11829641  | -0.078082167 | 3.550976003 | 0.688843798 | NA          | NA |
| ASV_16s_20588 | 0.11829641  | -0.078082167 | 3.550976003 | 0.688843798 | NA          | NA |
| ASV_16s_20589 | 0.11829641  | -0.078082167 | 3.550976003 | 0.688843798 | NA          | NA |
| ASV_16s_20590 | 0.100872694 | -0.077817034 | 3.551055072 | 0.620708142 | NA          | NA |
| ASV_16s_20591 | 0.100872694 | -0.077817034 | 3.551055072 | 0.620708142 | NA          | NA |
| ASV_16s_20592 | 0.100872694 | -0.077817034 | 3.551055072 | 0.620708142 | NA          | NA |
| ASV_16s_20593 | 0.100872694 | -0.077817034 | 3.551055072 | 0.620708142 | NA          | NA |
| ASV_16s_20594 | 0.100872694 | -0.077817034 | 3.551055072 | 0.620708142 | NA          | NA |
| ASV_16s_20595 | 0.100872694 | -0.077817034 | 3.551055072 | 0.620708142 | NA          | NA |
| ASV_16s_20596 | 0.100872694 | -0.077817034 | 3.551055072 | 0.620708142 | NA          | NA |
| ASV_16s_20597 | 0.100872694 | -0.077817034 | 3.551055072 | 0.620708142 | NA          | NA |
| ASV_16s_20598 | 0.100872694 | -0.077817034 | 3.551055072 | 0.620708142 | NA          | NA |
| ASV_16s_20599 | 0.075096233 | 0.220224315  | 3.550961732 | 0.347585407 | NA          | NA |
| ASV_16s_20600 | 0.075096233 | 0.220224315  | 3.550961732 | 0.347585407 | NA          | NA |
| ASV_16s_20601 | 0.075096233 | 0.220224315  | 3.550961732 | 0.347585407 | NA          | NA |
| ASV_16s_20602 | 0.074946271 | 0.220224895  | 3.550962498 | 0.346866244 | NA          | NA |
| ASV_16s_20603 | 0.128169116 | 0.310954091  | 3.551097746 | 0.700566328 | NA          | NA |

|               |             |              |             |             |             |    |
|---------------|-------------|--------------|-------------|-------------|-------------|----|
| ASV_16s_20604 | 0.128169116 | 0.310954091  | 3.551097746 | 0.700566328 | NA          | NA |
| ASV_16s_20605 | 0.128169116 | 0.310954091  | 3.551097746 | 0.700566328 | NA          | NA |
| ASV_16s_20606 | 0.130332628 | 0.310953547  | 3.551089346 | 0.707248654 | NA          | NA |
| ASV_16s_20607 | 0.127360632 | 0.310954204  | 3.55110096  | 0.696857209 | 0.998359768 | NA |
| ASV_16s_20608 | 0.119930642 | 0.310956236  | 3.551132488 | 0.671723171 | 0.998543694 | NA |
| ASV_16s_20609 | 0.122001351 | 0.310955645  | 3.551123317 | 0.679053716 | 0.998491552 | NA |
| ASV_16s_20610 | 0.127763431 | 0.310954195  | 3.551099352 | 0.699317993 | NA          | NA |
| ASV_16s_20611 | 0.127763431 | 0.310954195  | 3.551099352 | 0.699317993 | NA          | NA |
| ASV_16s_20612 | 0.079107955 | 0.595572138  | 3.550896829 | 0.315278408 | NA          | NA |
| ASV_16s_20613 | 0.079107955 | 0.595572138  | 3.550896829 | 0.315278408 | NA          | NA |
| ASV_16s_20614 | 0.12488261  | 1.127028533  | 3.551521357 | 0.348654668 | 0.999833866 | NA |
| ASV_16s_20615 | 0.130116213 | 0.712088875  | 3.551318591 | 0.504740396 | 0.999428938 | NA |
| ASV_16s_20616 | 0.103845804 | -0.065116802 | 3.551148168 | 0.646561675 | 0.998713491 | NA |
| ASV_16s_20617 | 0.106818914 | -0.057042763 | 3.551310071 | 0.685040847 | 0.998448054 | NA |
| ASV_16s_20618 | 0.106818914 | -0.057042763 | 3.551310071 | 0.685040847 | 0.998448054 | NA |
| ASV_16s_20619 | 0.106818914 | -0.057042763 | 3.551310071 | 0.685040847 | 0.998448054 | NA |
| ASV_16s_20620 | 0.113524935 | -0.058902057 | 3.551247917 | 0.713677548 | 0.998228423 | NA |
| ASV_16s_20621 | 0.142831905 | 0.714835061  | 3.551205424 | 0.794175717 | 0.997502939 | NA |
| ASV_16s_20622 | 0.107809951 | -0.048335865 | 3.551388687 | 0.687042915 | 0.998433324 | NA |
| ASV_16s_20623 | 0.113502911 | -0.054388311 | 3.551286175 | 0.711793807 | 0.998243468 | NA |
| ASV_16s_20624 | 0.146020133 | 1.175344696  | 3.551348406 | 0.455566785 | 0.999593463 | NA |
| ASV_16s_20625 | 0.112415624 | -0.016179504 | 3.551295569 | 0.738191962 | 0.99802477  | NA |
| ASV_16s_20626 | 0.108305469 | -0.040540512 | 3.551438532 | 0.686038312 | 0.998440727 | NA |
| ASV_16s_20627 | 0.115073525 | -0.045225583 | 3.551373661 | 0.711024591 | 0.998249587 | NA |
| ASV_16s_20628 | 0.108800987 | -0.02796613  | 3.551486824 | 0.683756835 | 0.998457452 | NA |
| ASV_16s_20629 | 0.149064423 | 0.748162243  | 3.551446209 | 0.66913584  | 0.998561806 | NA |
| ASV_16s_20630 | 0.144175822 | -0.499347722 | 3.551035    | 0.420776515 | 0.999687988 | NA |
| ASV_16s_20631 | 0.113436841 | -0.028555705 | 3.551452379 | 0.697418167 | 0.998355496 | NA |
| ASV_16s_20632 | 0.102411318 | 0.954481294  | 3.551772877 | 0.37485118  | 0.999788071 | NA |
| ASV_16s_20633 | 0.134143233 | 0.007863479  | 3.551540843 | 0.617411128 | 0.998893001 | NA |
| ASV_16s_20634 | 0.109792024 | 0.010854909  | 3.55153764  | 0.675986172 | 0.998513521 | NA |
| ASV_16s_20635 | 0.113414817 | -0.010314244 | 3.551503044 | 0.690366534 | 0.998408666 | NA |
| ASV_16s_20636 | 0.120703654 | 0.319958766  | 3.551506711 | 0.528128664 | 0.999336828 | NA |
| ASV_16s_20637 | 0.173066945 | -0.627207077 | 3.55127848  | 0.412628487 | 0.999707711 | NA |
| ASV_16s_20638 | 0.111774097 | 0.208160442  | 3.551523354 | 0.668827072 | NA          | NA |
| ASV_16s_20639 | 0.267970681 | 1.118527573  | 3.550825393 | 0.788465414 | NA          | NA |
| ASV_16s_20640 | 0.182961433 | 1.019033013  | 3.551198631 | 0.579176537 | 0.999101843 | NA |
| ASV_16s_20641 | 0.1602923   | 0.980275875  | 3.551336059 | 0.52849883  | 0.999335295 | NA |
| ASV_16s_20642 | 0.129316525 | 0.922921412  | 3.551491762 | 0.469081679 | NA          | NA |
| ASV_16s_20643 | 0.085041555 | 0.286063027  | 3.551792949 | 0.40493347  | 0.999725535 | NA |
| ASV_16s_20644 | 0.085041555 | 0.286063027  | 3.551792949 | 0.40493347  | 0.999725535 | NA |
| ASV_16s_20645 | 0.050500534 | 0.29361995   | 3.551905284 | 0.275091084 | 0.999925426 | NA |
| ASV_16s_20646 | 0.050500534 | 0.29361995   | 3.551905284 | 0.275091084 | 0.999925426 | NA |
| ASV_16s_20647 | 0.08594544  | -0.305132624 | 3.551612331 | 0.408372764 | 0.999717664 | NA |
| ASV_16s_20648 | 0.267291056 | 1.117960968  | 3.550827929 | 0.786660503 | NA          | NA |
| ASV_16s_20649 | 0.203948073 | 0.394611617  | 3.551114961 | 0.636594251 | NA          | NA |
| ASV_16s_20650 | 0.203948073 | 0.394611617  | 3.551114961 | 0.636594251 | NA          | NA |
| ASV_16s_20651 | 0.145777055 | 0.357735352  | 3.551735549 | 0.482677317 | 0.99950747  | NA |
| ASV_16s_20652 | 0.133981894 | -0.483449709 | 3.550932577 | 0.469891608 | NA          | NA |
| ASV_16s_20653 | 0.148560597 | 1.152126742  | 3.551029988 | 0.470190378 | NA          | NA |
| ASV_16s_20654 | 0.148560597 | 1.152126742  | 3.551029988 | 0.470190378 | NA          | NA |
| ASV_16s_20655 | 0.148560597 | 1.152126742  | 3.551029988 | 0.470190378 | NA          | NA |
| ASV_16s_20656 | 0.148560597 | 1.152126742  | 3.551029988 | 0.470190378 | NA          | NA |
| ASV_16s_20657 | 0.08465467  | -0.077473746 | 3.551157615 | 0.550441599 | NA          | NA |
| ASV_16s_20658 | 0.08465467  | -0.077473746 | 3.551157615 | 0.550441599 | NA          | NA |
| ASV_16s_20659 | 0.08465467  | -0.077473746 | 3.551157615 | 0.550441599 | NA          | NA |
| ASV_16s_20660 | 0.234262581 | -0.028942992 | 3.550866511 | 1.131838597 | NA          | NA |
| ASV_16s_20661 | 0.175156646 | 0.435876848  | 3.551043259 | 1.208151618 | 0.990737996 | NA |
| ASV_16s_20662 | 0.127780884 | 0.260441572  | 3.551249469 | 0.947551131 | 0.995630826 | NA |
| ASV_16s_20663 | 0.161350981 | 0.543527598  | 3.551128807 | 1.032046672 | 0.994294881 | NA |
| ASV_16s_20664 | 0.186862659 | -0.028679676 | 3.550954039 | 0.968374256 | NA          | NA |
| ASV_16s_20665 | 0.160877289 | 0.360355637  | 3.550771733 | 0.907954344 | 0.99617993  | NA |
| ASV_16s_20666 | 0.111689971 | -0.026021119 | 3.551239935 | 0.722598732 | NA          | NA |
| ASV_16s_20667 | 0.111689971 | -0.026021119 | 3.551239935 | 0.722598732 | NA          | NA |
| ASV_16s_20668 | 0.111689971 | -0.026021119 | 3.551239935 | 0.722598732 | NA          | NA |
| ASV_16s_20669 | 0.111689971 | -0.026021119 | 3.551239935 | 0.722598732 | NA          | NA |
| ASV_16s_20670 | 0.111689971 | -0.026021119 | 3.551239935 | 0.722598732 | NA          | NA |

|               |             |              |             |             |             |    |
|---------------|-------------|--------------|-------------|-------------|-------------|----|
| ASV_16s_20671 | 0.111689971 | -0.026021119 | 3.551239935 | 0.722598732 | NA          | NA |
| ASV_16s_20672 | 0.127620006 | -0.073032744 | 3.550985081 | 0.743386187 | NA          | NA |
| ASV_16s_20673 | 0.127620006 | -0.073032744 | 3.550985081 | 0.743386187 | NA          | NA |
| ASV_16s_20674 | 0.142633242 | 0.324724732  | 3.550926432 | 0.828433034 | 0.997142841 | NA |
| ASV_16s_20675 | 0.143788107 | 0.336999241  | 3.550944255 | 0.827271639 | 0.997155574 | NA |
| ASV_16s_20676 | 0.093208498 | -0.072427    | 3.551157373 | 0.612583757 | NA          | NA |
| ASV_16s_20677 | 0.093208498 | -0.072427    | 3.551157373 | 0.612583757 | NA          | NA |
| ASV_16s_20678 | 0.093208498 | -0.072427    | 3.551157373 | 0.612583757 | NA          | NA |
| ASV_16s_20679 | 0.093208498 | -0.072427    | 3.551157373 | 0.612583757 | NA          | NA |
| ASV_16s_20680 | 0.108396446 | 0.217372703  | 3.551147922 | 0.678965589 | 0.998492186 | NA |
| ASV_16s_20681 | 0.091533697 | -0.072386084 | 3.551169029 | 0.60531011  | NA          | NA |
| ASV_16s_20682 | 0.091533697 | -0.072386084 | 3.551169029 | 0.60531011  | NA          | NA |
| ASV_16s_20683 | 0.091533697 | -0.072386084 | 3.551169029 | 0.60531011  | NA          | NA |
| ASV_16s_20684 | 0.091533697 | -0.072386084 | 3.551169029 | 0.60531011  | NA          | NA |
| ASV_16s_20685 | 0.091533697 | -0.072386084 | 3.551169029 | 0.60531011  | NA          | NA |
| ASV_16s_20686 | 0.091533697 | -0.072386084 | 3.551169029 | 0.60531011  | NA          | NA |
| ASV_16s_20687 | 0.091533697 | -0.072386084 | 3.551169029 | 0.60531011  | NA          | NA |
| ASV_16s_20688 | 0.091533697 | -0.072386084 | 3.551169029 | 0.60531011  | NA          | NA |
| ASV_16s_20689 | 0.091533697 | -0.072386084 | 3.551169029 | 0.60531011  | NA          | NA |
| ASV_16s_20690 | 0.124023823 | -0.061226149 | 3.5511958   | 0.792449705 | 0.997520245 | NA |
| ASV_16s_20691 | 0.142314563 | 0.550886515  | 3.550904721 | 0.655897957 | 0.998652126 | NA |
| ASV_16s_20692 | 0.140901714 | 0.449325725  | 3.551285954 | 0.756145546 | 0.997866174 | NA |
| ASV_16s_20693 | 0.11357142  | -0.072829181 | 3.551042918 | 0.69516252  | NA          | NA |
| ASV_16s_20694 | 0.11357142  | -0.072829181 | 3.551042918 | 0.69516252  | NA          | NA |
| ASV_16s_20695 | 0.12740726  | 0.360232302  | 3.551387769 | 0.759825208 | NA          | NA |
| ASV_16s_20696 | 0.12740726  | 0.360232302  | 3.551387769 | 0.759825208 | NA          | NA |
| ASV_16s_20697 | 0.12740726  | 0.360232302  | 3.551387769 | 0.759825208 | NA          | NA |
| ASV_16s_20698 | 0.12740726  | 0.360232302  | 3.551387769 | 0.759825208 | NA          | NA |
| ASV_16s_20699 | 0.113260652 | 0.360202548  | 3.55148557  | 0.71224815  | NA          | NA |
| ASV_16s_20700 | 0.113260652 | 0.360202548  | 3.55148557  | 0.71224815  | NA          | NA |
| ASV_16s_20701 | 0.113260652 | 0.360202548  | 3.55148557  | 0.71224815  | NA          | NA |
| ASV_16s_20702 | 0.113260652 | 0.360202548  | 3.55148557  | 0.71224815  | NA          | NA |
| ASV_16s_20703 | 0.113260652 | 0.360202548  | 3.55148557  | 0.71224815  | NA          | NA |
| ASV_16s_20704 | 0.113260652 | 0.360202548  | 3.55148557  | 0.71224815  | NA          | NA |
| ASV_16s_20705 | 0.113260652 | 0.360202548  | 3.55148557  | 0.71224815  | NA          | NA |
| ASV_16s_20706 | 0.113260652 | 0.360202548  | 3.55148557  | 0.71224815  | NA          | NA |
| ASV_16s_20707 | 0.113260652 | 0.360202548  | 3.55148557  | 0.71224815  | NA          | NA |
| ASV_16s_20708 | 0.113260652 | 0.360202548  | 3.55148557  | 0.71224815  | NA          | NA |
| ASV_16s_20709 | 0.113260652 | 0.360202548  | 3.55148557  | 0.71224815  | NA          | NA |
| ASV_16s_20710 | 0.113260652 | 0.360202548  | 3.55148557  | 0.71224815  | NA          | NA |
| ASV_16s_20711 | 0.113260652 | 0.360202548  | 3.55148557  | 0.71224815  | NA          | NA |
| ASV_16s_20712 | 0.113260652 | 0.360202548  | 3.55148557  | 0.71224815  | NA          | NA |
| ASV_16s_20713 | 0.113260652 | 0.360202548  | 3.55148557  | 0.71224815  | NA          | NA |
| ASV_16s_20714 | 0.146751213 | 0.315939988  | 3.551075532 | 0.781999972 | NA          | NA |
| ASV_16s_20715 | 0.146751213 | 0.315939988  | 3.551075532 | 0.781999972 | NA          | NA |
| ASV_16s_20716 | 0.146751213 | 0.315939988  | 3.551075532 | 0.781999972 | NA          | NA |
| ASV_16s_20717 | 0.146751213 | 0.315939988  | 3.551075532 | 0.781999972 | NA          | NA |
| ASV_16s_20718 | 0.129678331 | 0.315940088  | 3.551139279 | 0.727383308 | 0.998116375 | NA |
| ASV_16s_20719 | 0.1268513   | 0.315940107  | 3.551151452 | 0.719300291 | NA          | NA |
| ASV_16s_20720 | 0.1268513   | 0.315940107  | 3.551151452 | 0.719300291 | NA          | NA |
| ASV_16s_20721 | 0.152081891 | 0.31593987   | 3.551058613 | 0.79909519  | 0.997453176 | NA |
| ASV_16s_20722 | 0.122744953 | 0.315940137  | 3.551170156 | 0.706110145 | 0.998288348 | NA |
| ASV_16s_20723 | 0.121033975 | 0.31594015   | 3.55117832  | 0.700745498 | 0.998330002 | NA |
| ASV_16s_20724 | 0.143461167 | 0.315939907  | 3.551086741 | 0.770926459 | 0.997729461 | NA |
| ASV_16s_20725 | 0.11829641  | 0.315940171  | 3.551191865 | 0.692270415 | NA          | NA |
| ASV_16s_20726 | 0.11829641  | 0.315940171  | 3.551191865 | 0.692270415 | NA          | NA |
| ASV_16s_20727 | 0.11829641  | 0.315940171  | 3.551191865 | 0.692270415 | NA          | NA |
| ASV_16s_20728 | 0.11829641  | 0.315940171  | 3.551191865 | 0.692270415 | NA          | NA |
| ASV_16s_20729 | 0.11829641  | 0.315940171  | 3.551191865 | 0.692270415 | NA          | NA |
| ASV_16s_20730 | 0.11829641  | 0.315940171  | 3.551191865 | 0.692270415 | NA          | NA |
| ASV_16s_20731 | 0.11829641  | 0.315940171  | 3.551191865 | 0.692270415 | NA          | NA |
| ASV_16s_20732 | 0.11829641  | 0.315940171  | 3.551191865 | 0.692270415 | NA          | NA |
| ASV_16s_20733 | 0.11829641  | 0.315940171  | 3.551191865 | 0.692270415 | NA          | NA |
| ASV_16s_20734 | 0.11829641  | 0.315940171  | 3.551191865 | 0.692270415 | NA          | NA |
| ASV_16s_20735 | 0.14761616  | 0.719501554  | 3.551222234 | 0.843727377 | 0.996971671 | NA |
| ASV_16s_20736 | 0.11829641  | 0.481199717  | 3.551126732 | 0.908728317 | 0.996169651 | NA |
| ASV_16s_20737 | 0.159280331 | 0.596017078  | 3.550722697 | 0.591455151 | NA          | NA |

|               |             |             |             |             |             |    |
|---------------|-------------|-------------|-------------|-------------|-------------|----|
| ASV_16s_20738 | 0.203524651 | 0.687861523 | 3.550880954 | 0.866624607 | NA          | NA |
| ASV_16s_20739 | 0.203524651 | 0.687861523 | 3.550880954 | 0.866624607 | NA          | NA |
| ASV_16s_20740 | 0.188474079 | 0.997985711 | 3.550933026 | 0.653658592 | 0.998667019 | NA |
| ASV_16s_20741 | 0.194600277 | 1.091168412 | 3.55090698  | 0.649401289 | 0.998695029 | NA |
| ASV_16s_20742 | 0.169660864 | 1.08681568  | 3.551264874 | 0.612123552 | 0.998923646 | NA |
| ASV_16s_20743 | 0.185895512 | 1.086269756 | 3.551042063 | 0.652105708 | 0.998677282 | NA |
| ASV_16s_20744 | 0.182784538 | 0.733583106 | 3.551163206 | 0.868681338 | 0.996678239 | NA |
| ASV_16s_20745 | 0.145149748 | 0.801285116 | 3.55113456  | 0.620523423 | 0.998874692 | NA |
| ASV_16s_20746 | 0.184932206 | 0.733606675 | 3.551156349 | 0.875368999 | NA          | NA |
| ASV_16s_20747 | 0.184932206 | 0.733606675 | 3.551156349 | 0.875368999 | NA          | NA |
| ASV_16s_20748 | 0.170143098 | 0.733434906 | 3.551206338 | 0.831426914 | 0.997109847 | NA |
| ASV_16s_20749 | 0.169005474 | 0.733420471 | 3.55121054  | 0.828092537 | 0.997146578 | NA |
| ASV_16s_20750 | 0.165592603 | 0.733375998 | 3.55122349  | 0.818131631 | 0.997254481 | NA |
| ASV_16s_20751 | 0.156491614 | 0.733248108 | 3.551260742 | 0.791896294 | NA          | NA |
| ASV_16s_20752 | 0.156491614 | 0.733248108 | 3.551260742 | 0.791896294 | NA          | NA |
| ASV_16s_20753 | 0.156491614 | 0.733248108 | 3.551260742 | 0.791896294 | NA          | NA |
| ASV_16s_20754 | 0.156491614 | 0.733248108 | 3.551260742 | 0.791896294 | NA          | NA |
| ASV_16s_20755 | 0.156491614 | 0.733248108 | 3.551260742 | 0.791896294 | NA          | NA |
| ASV_16s_20756 | 0.156491614 | 0.733248108 | 3.551260742 | 0.791896294 | NA          | NA |
| ASV_16s_20757 | 0.156491614 | 0.733248108 | 3.551260742 | 0.791896294 | NA          | NA |
| ASV_16s_20758 | 0.156491614 | 0.733248108 | 3.551260742 | 0.791896294 | NA          | NA |
| ASV_16s_20759 | 0.156491614 | 0.733248108 | 3.551260742 | 0.791896294 | NA          | NA |
| ASV_16s_20760 | 0.156491614 | 0.733248108 | 3.551260742 | 0.791896294 | NA          | NA |
| ASV_16s_20761 | 0.156491614 | 0.733248108 | 3.551260742 | 0.791896294 | NA          | NA |
| ASV_16s_20762 | 0.156491614 | 0.733248108 | 3.551260742 | 0.791896294 | NA          | NA |
| ASV_16s_20763 | 0.156491614 | 0.733248108 | 3.551260742 | 0.791896294 | NA          | NA |
| ASV_16s_20764 | 0.233958909 | 0.734022549 | 3.551035522 | 1.026848548 | NA          | NA |
| ASV_16s_20765 | 0.077519007 | 0.679311099 | 3.551673351 | 0.511409558 | NA          | NA |
| ASV_16s_20766 | 0.077519007 | 0.679311099 | 3.551673351 | 0.511409558 | NA          | NA |
| ASV_16s_20767 | 0.077519007 | 0.679311099 | 3.551673351 | 0.511409558 | NA          | NA |
| ASV_16s_20768 | 0.077519007 | 0.679311099 | 3.551673351 | 0.511409558 | NA          | NA |
| ASV_16s_20769 | 0.077519007 | 0.679311099 | 3.551673351 | 0.511409558 | NA          | NA |
| ASV_16s_20770 | 0.1454865   | 0.692444334 | 3.551060797 | 0.72029063  | NA          | NA |
| ASV_16s_20771 | 0.1454865   | 0.692444334 | 3.551060797 | 0.72029063  | NA          | NA |
| ASV_16s_20772 | 0.1454865   | 0.692444334 | 3.551060797 | 0.72029063  | NA          | NA |
| ASV_16s_20773 | 0.134610464 | 0.692306133 | 3.551101532 | 0.68553079  | 0.998444458 | NA |
| ASV_16s_20774 | 0.147302863 | 0.692465443 | 3.551054578 | 0.725361639 | 0.99813319  | NA |
| ASV_16s_20775 | 0.148128483 | 0.69247487  | 3.551051801 | 0.727674429 | 0.998113946 | NA |
| ASV_16s_20776 | 0.138271787 | 0.69235324  | 3.551087114 | 0.696585154 | 0.998361838 | NA |
| ASV_16s_20777 | 0.148623855 | 0.692480476 | 3.551050149 | 0.729064407 | 0.998102316 | NA |
| ASV_16s_20778 | 0.149614598 | 0.69249158  | 3.551046879 | 0.731849493 | NA          | NA |
| ASV_16s_20779 | 0.149614598 | 0.69249158  | 3.551046879 | 0.731849493 | NA          | NA |
| ASV_16s_20780 | 0.149614598 | 0.69249158  | 3.551046879 | 0.731849493 | NA          | NA |
| ASV_16s_20781 | 0.149614598 | 0.69249158  | 3.551046879 | 0.731849493 | NA          | NA |
| ASV_16s_20782 | 0.125812775 | 0.692177164 | 3.551139575 | 0.658130636 | 0.998637166 | NA |
| ASV_16s_20783 | 0.11829641  | 0.692052098 | 3.551176489 | 0.635666605 | NA          | NA |
| ASV_16s_20784 | 0.11829641  | 0.692052098 | 3.551176489 | 0.635666605 | NA          | NA |
| ASV_16s_20785 | 0.11829641  | 0.692052098 | 3.551176489 | 0.635666605 | NA          | NA |
| ASV_16s_20786 | 0.11829641  | 0.692052098 | 3.551176489 | 0.635666605 | NA          | NA |
| ASV_16s_20787 | 0.11829641  | 0.692052098 | 3.551176489 | 0.635666605 | NA          | NA |
| ASV_16s_20788 | 0.11829641  | 0.692052098 | 3.551176489 | 0.635666605 | NA          | NA |
| ASV_16s_20789 | 0.11829641  | 0.692052098 | 3.551176489 | 0.635666605 | NA          | NA |
| ASV_16s_20790 | 0.11829641  | 0.692052098 | 3.551176489 | 0.635666605 | NA          | NA |
| ASV_16s_20791 | 0.11829641  | 0.692052098 | 3.551176489 | 0.635666605 | NA          | NA |
| ASV_16s_20792 | 0.11829641  | 0.692052098 | 3.551176489 | 0.635666605 | NA          | NA |
| ASV_16s_20793 | 0.11829641  | 0.692052098 | 3.551176489 | 0.635666605 | NA          | NA |
| ASV_16s_20794 | 0.11829641  | 0.692052098 | 3.551176489 | 0.635666605 | NA          | NA |
| ASV_16s_20795 | 0.11829641  | 0.692052098 | 3.551176489 | 0.635666605 | NA          | NA |
| ASV_16s_20796 | 0.136052336 | 0.692325549 | 3.551095807 | 0.687978955 | 0.998426405 | NA |
| ASV_16s_20797 | 0.140365532 | 0.692381713 | 3.55107925  | 0.700955406 | 0.998328385 | NA |
| ASV_16s_20798 | 0.160366106 | 0.692602135 | 3.551013997 | 0.761526732 | 0.99781705  | NA |
| ASV_16s_20799 | 0.173783678 | 0.692723709 | 3.550978568 | 0.801599645 | NA          | NA |
| ASV_16s_20800 | 0.173783678 | 0.692723709 | 3.550978568 | 0.801599645 | NA          | NA |
| ASV_16s_20801 | 0.172739507 | 1.148714333 | 3.551308925 | 0.447072857 | 0.999618132 | NA |
| ASV_16s_20802 | 0.16522486  | 0.291736712 | 3.551727214 | 0.605092857 | NA          | NA |
| ASV_16s_20803 | 0.097910918 | 0.298961729 | 3.55193236  | 0.440514457 | NA          | NA |
| ASV_16s_20804 | 0.097910918 | 0.298961729 | 3.55193236  | 0.440514457 | NA          | NA |

|               |             |              |             |             |             |    |
|---------------|-------------|--------------|-------------|-------------|-------------|----|
| ASV_16s_20805 | 0.097910918 | 0.298961729  | 3.55193236  | 0.440514457 | NA          | NA |
| ASV_16s_20806 | 0.097910918 | 0.298961729  | 3.55193236  | 0.440514457 | NA          | NA |
| ASV_16s_20807 | 0.097910918 | 0.298961729  | 3.55193236  | 0.440514457 | NA          | NA |
| ASV_16s_20808 | 0.097910918 | 0.298961729  | 3.55193236  | 0.440514457 | NA          | NA |
| ASV_16s_20809 | 0.097910918 | 0.298961729  | 3.55193236  | 0.440514457 | NA          | NA |
| ASV_16s_20810 | 0.097910918 | 0.298961729  | 3.55193236  | 0.440514457 | NA          | NA |
| ASV_16s_20811 | 0.097910918 | 0.298961729  | 3.55193236  | 0.440514457 | NA          | NA |
| ASV_16s_20812 | 0.097910918 | 0.298961729  | 3.55193236  | 0.440514457 | NA          | NA |
| ASV_16s_20813 | 0.097910918 | 0.298961729  | 3.55193236  | 0.440514457 | NA          | NA |
| ASV_16s_20814 | 0.097910918 | 0.298961729  | 3.55193236  | 0.440514457 | NA          | NA |
| ASV_16s_20815 | 0.097910918 | 0.298961729  | 3.55193236  | 0.440514457 | NA          | NA |
| ASV_16s_20816 | 0.097910918 | 0.298961729  | 3.55193236  | 0.440514457 | NA          | NA |
| ASV_16s_20817 | 0.097910918 | 0.298961729  | 3.55193236  | 0.440514457 | NA          | NA |
| ASV_16s_20818 | 0.097910918 | 0.298961729  | 3.55193236  | 0.440514457 | NA          | NA |
| ASV_16s_20819 | 0.097910918 | 0.298961729  | 3.55193236  | 0.440514457 | NA          | NA |
| ASV_16s_20820 | 0.097910918 | 0.298961729  | 3.55193236  | 0.440514457 | NA          | NA |
| ASV_16s_20821 | 0.097939438 | 0.105940349  | 3.55178856  | 0.560018666 | 0.999195696 | NA |
| ASV_16s_20822 | 0.099464431 | 0.063805997  | 3.551748461 | 0.582763391 | 0.999083487 | NA |
| ASV_16s_20823 | 0.097945142 | 0.074308753  | 3.551765289 | 0.575312349 | 0.999121338 | NA |
| ASV_16s_20824 | 0.097950846 | 0.0433485    | 3.551737181 | 0.588311966 | 0.999054598 | NA |
| ASV_16s_20825 | 0.099982269 | 9.36E-05     | 3.55167946  | 0.608814523 | 0.998942531 | NA |
| ASV_16s_20826 | 0.097962254 | -0.016099015 | 3.551676945 | 0.608000254 | 0.998947144 | NA |
| ASV_16s_20827 | 0.097962254 | -0.016099015 | 3.551676945 | 0.608000254 | 0.998947144 | NA |
| ASV_16s_20828 | 0.097962254 | -0.016099015 | 3.551676945 | 0.608000254 | 0.998947144 | NA |
| ASV_16s_20829 | 0.100241187 | -0.029710231 | 3.551650045 | 0.618425086 | 0.998887058 | NA |
| ASV_16s_20830 | 0.100241187 | -0.029710231 | 3.551650045 | 0.618425086 | 0.998887058 | NA |
| ASV_16s_20831 | 0.100500106 | -0.05880951  | 3.551619809 | 0.625572662 | 0.998844558 | NA |
| ASV_16s_20832 | 0.100500106 | -0.05880951  | 3.551619809 | 0.625572662 | 0.998844558 | NA |
| ASV_16s_20833 | 0.100500106 | -0.05880951  | 3.551619809 | 0.625572662 | 0.998844558 | NA |
| ASV_16s_20834 | 0.100500106 | -0.05880951  | 3.551619809 | 0.625572662 | 0.998844558 | NA |
| ASV_16s_20835 | 0.097967958 | -0.044150402 | 3.551651989 | 0.614343922 | 0.998910848 | NA |
| ASV_16s_20836 | 0.097967958 | -0.044150402 | 3.551651989 | 0.614343922 | 0.998910848 | NA |
| ASV_16s_20837 | 0.100759025 | -0.086958582 | 3.551592902 | 0.630346481 | 0.998815574 | NA |
| ASV_16s_20838 | 0.100759025 | -0.086958582 | 3.551592902 | 0.630346481 | 0.998815574 | NA |
| ASV_16s_20839 | 0.100759025 | -0.086958582 | 3.551592902 | 0.630346481 | 0.998815574 | NA |
| ASV_16s_20840 | 0.106410923 | -0.115948371 | 3.551531279 | 0.655338318 | 0.998655858 | NA |
| ASV_16s_20841 | 0.100759025 | -0.086958582 | 3.551592902 | 0.630346481 | 0.998815574 | NA |
| ASV_16s_20842 | 0.101017944 | -0.114174386 | 3.55156854  | 0.632713371 | 0.998801025 | NA |
| ASV_16s_20843 | 0.10652809  | -0.141311004 | 3.551510059 | 0.6561272   | 0.998650595 | NA |
| ASV_16s_20844 | 0.107735025 | -0.171317949 | 3.551478897 | 0.659247672 | 0.998629641 | NA |
| ASV_16s_20845 | 0.101276863 | -0.140647618 | 3.551546835 | 0.632664072 | 0.998801329 | NA |
| ASV_16s_20846 | 0.101276863 | -0.140647618 | 3.551546835 | 0.632664072 | 0.998801329 | NA |
| ASV_16s_20847 | 0.097990775 | -0.149684789 | 3.551562211 | 0.616748482 | 0.998896873 | NA |
| ASV_16s_20848 | 0.101535782 | -0.166567555 | 3.551526763 | 0.630194367 | 0.998816505 | NA |
| ASV_16s_20849 | 0.116406619 | -0.254278    | 3.551360548 | 0.681751399 | 0.998472055 | NA |
| ASV_16s_20850 | 0.107746433 | -0.218315068 | 3.551447705 | 0.64767064  | 0.998706302 | NA |
| ASV_16s_20851 | 0.097996479 | -0.174682696 | 3.551545873 | 0.611535322 | 0.99892702  | NA |
| ASV_16s_20852 | 0.1017947   | -0.192201194 | 3.551506626 | 0.625298749 | 0.998846207 | NA |
| ASV_16s_20853 | 0.1017947   | -0.192201194 | 3.551506626 | 0.625298749 | 0.998846207 | NA |
| ASV_16s_20854 | 0.100534331 | -0.210865715 | 3.551503957 | 0.612565136 | 0.998921109 | NA |
| ASV_16s_20855 | 0.112645598 | -0.28455854  | 3.551368934 | 0.643615088 | 0.998732463 | NA |
| ASV_16s_20856 | 0.098007887 | -0.224440948 | 3.55151411  | 0.593998381 | 0.99902436  | NA |
| ASV_16s_20857 | 0.102571457 | -0.268159198 | 3.551454297 | 0.596166298 | 0.999012663 | NA |
| ASV_16s_20858 | 0.098013591 | -0.249325189 | 3.551498981 | 0.582161192 | 0.999086587 | NA |
| ASV_16s_20859 | 0.111498161 | -0.349042629 | 3.551349764 | 0.589598031 | 0.999047815 | NA |
| ASV_16s_20860 | 0.098030703 | -0.324555694 | 3.551468157 | 0.53416381  | 0.999311523 | NA |
| ASV_16s_20861 | 0.035001974 | -0.093274796 | 3.551885091 | 0.217120445 | 0.999966687 | NA |
| ASV_16s_20862 | 0.035001974 | -0.093274796 | 3.551885091 | 0.217120445 | 0.999966687 | NA |
| ASV_16s_20863 | 0.035001974 | -0.093274796 | 3.551885091 | 0.217120445 | 0.999966687 | NA |
| ASV_16s_20864 | 0.166098703 | -0.578899217 | 3.550959907 | 0.623921317 | NA          | NA |
| ASV_16s_20865 | 0.134692112 | -0.511803286 | 3.551161937 | 0.544871544 | 0.999265029 | NA |
| ASV_16s_20866 | 0.133581355 | -0.509008003 | 3.551169098 | 0.54230013  | NA          | NA |
| ASV_16s_20867 | 0.133581355 | -0.509008003 | 3.551169098 | 0.54230013  | NA          | NA |
| ASV_16s_20868 | 0.134800254 | -0.512098872 | 3.551161183 | 0.545154537 | 0.999263773 | NA |
| ASV_16s_20869 | 0.127090317 | -0.492053861 | 3.551213138 | 0.527440802 | 0.999339672 | NA |
| ASV_16s_20870 | 0.136019153 | -0.515163509 | 3.55115338  | 0.548030074 | 0.99925092  | NA |
| ASV_16s_20871 | 0.126163026 | -0.489541953 | 3.551219657 | 0.52536097  | 0.999348219 | NA |

|               |             |              |             |             |             |    |
|---------------|-------------|--------------|-------------|-------------|-------------|----|
| ASV_16s_20872 | 0.13207712  | -0.505152583 | 3.551179034 | 0.5387994   | 0.999291647 | NA |
| ASV_16s_20873 | 0.137760437 | -0.519505655 | 3.551142363 | 0.552171121 | NA          | NA |
| ASV_16s_20874 | 0.137760437 | -0.519505655 | 3.551142363 | 0.552171121 | NA          | NA |
| ASV_16s_20875 | 0.137760437 | -0.519505655 | 3.551142363 | 0.552171121 | NA          | NA |
| ASV_16s_20876 | 0.137760437 | -0.519505655 | 3.551142363 | 0.552171121 | NA          | NA |
| ASV_16s_20877 | 0.137760437 | -0.519505655 | 3.551142363 | 0.552171121 | NA          | NA |
| ASV_16s_20878 | 0.137760437 | -0.519505655 | 3.551142363 | 0.552171121 | NA          | NA |
| ASV_16s_20879 | 0.130744923 | -0.501706724 | 3.551187975 | 0.535729644 | 0.999304852 | NA |
| ASV_16s_20880 | 0.122453861 | -0.479324023 | 3.551246482 | 0.51718103  | NA          | NA |
| ASV_16s_20881 | 0.122453861 | -0.479324023 | 3.551246482 | 0.51718103  | NA          | NA |
| ASV_16s_20882 | 0.122453861 | -0.479324023 | 3.551246482 | 0.51718103  | NA          | NA |
| ASV_16s_20883 | 0.122453861 | -0.479324023 | 3.551246482 | 0.51718103  | NA          | NA |
| ASV_16s_20884 | 0.135124149 | -0.512915223 | 3.5511591   | 0.545917164 | NA          | NA |
| ASV_16s_20885 | 0.135124149 | -0.512915223 | 3.5511591   | 0.545917164 | NA          | NA |
| ASV_16s_20886 | 0.135124149 | -0.512915223 | 3.5511591   | 0.545917164 | NA          | NA |
| ASV_16s_20887 | 0.135124149 | -0.512915223 | 3.5511591   | 0.545917164 | NA          | NA |
| ASV_16s_20888 | 0.10412497  | -0.424223995 | 3.551400024 | 0.474038748 | NA          | NA |
| ASV_16s_20889 | 0.10412497  | -0.424223995 | 3.551400024 | 0.474038748 | NA          | NA |
| ASV_16s_20890 | 0.10412497  | -0.424223995 | 3.551400024 | 0.474038748 | NA          | NA |
| ASV_16s_20891 | 0.10412497  | -0.424223995 | 3.551400024 | 0.474038748 | NA          | NA |
| ASV_16s_20892 | 0.10412497  | -0.424223995 | 3.551400024 | 0.474038748 | NA          | NA |
| ASV_16s_20893 | 0.10412497  | -0.424223995 | 3.551400024 | 0.474038748 | NA          | NA |
| ASV_16s_20894 | 0.10412497  | -0.424223995 | 3.551400024 | 0.474038748 | NA          | NA |
| ASV_16s_20895 | 0.10412497  | -0.424223995 | 3.551400024 | 0.474038748 | NA          | NA |
| ASV_16s_20896 | 0.10412497  | -0.424223995 | 3.551400024 | 0.474038748 | NA          | NA |
| ASV_16s_20897 | 0.10412497  | -0.424223995 | 3.551400024 | 0.474038748 | NA          | NA |
| ASV_16s_20898 | 0.10412497  | -0.424223995 | 3.551400024 | 0.474038748 | NA          | NA |
| ASV_16s_20899 | 0.10412497  | -0.424223995 | 3.551400024 | 0.474038748 | NA          | NA |
| ASV_16s_20900 | 0.10412497  | -0.424223995 | 3.551400024 | 0.474038748 | NA          | NA |
| ASV_16s_20901 | 0.10412497  | -0.424223995 | 3.551400024 | 0.474038748 | NA          | NA |
| ASV_16s_20902 | 0.10412497  | -0.424223995 | 3.551400024 | 0.474038748 | NA          | NA |
| ASV_16s_20903 | 0.10412497  | -0.424223995 | 3.551400024 | 0.474038748 | NA          | NA |
| ASV_16s_20904 | 0.101846037 | -0.416762589 | 3.551422025 | 0.467463398 | 0.999557112 | NA |
| ASV_16s_20905 | 0.109128686 | -0.440040223 | 3.551354367 | 0.482432949 | 0.999508296 | NA |
| ASV_16s_20906 | 0.100073534 | -0.410912528 | 3.55143881  | 0.462285622 | 0.999573194 | NA |
| ASV_16s_20907 | 0.098047815 | -0.404217604 | 3.551457005 | 0.456303718 | NA          | NA |
| ASV_16s_20908 | 0.098047815 | -0.404217604 | 3.551457005 | 0.456303718 | NA          | NA |
| ASV_16s_20909 | 0.098047815 | -0.404217604 | 3.551457005 | 0.456303718 | NA          | NA |
| ASV_16s_20910 | 0.098047815 | -0.404217604 | 3.551457005 | 0.456303718 | NA          | NA |
| ASV_16s_20911 | 0.098047815 | -0.404217604 | 3.551457005 | 0.456303718 | NA          | NA |
| ASV_16s_20912 | 0.098047815 | -0.404217604 | 3.551457005 | 0.456303718 | NA          | NA |
| ASV_16s_20913 | 0.098047815 | -0.404217604 | 3.551457005 | 0.456303718 | NA          | NA |
| ASV_16s_20914 | 0.098047815 | -0.404217604 | 3.551457005 | 0.456303718 | NA          | NA |
| ASV_16s_20915 | 0.098047815 | -0.404217604 | 3.551457005 | 0.456303718 | NA          | NA |
| ASV_16s_20916 | 0.098047815 | -0.404217604 | 3.551457005 | 0.456303718 | NA          | NA |
| ASV_16s_20917 | 0.098047815 | -0.404217604 | 3.551457005 | 0.456303718 | NA          | NA |
| ASV_16s_20918 | 0.098047815 | -0.404217604 | 3.551457005 | 0.456303718 | NA          | NA |
| ASV_16s_20919 | 0.098047815 | -0.404217604 | 3.551457005 | 0.456303718 | NA          | NA |
| ASV_16s_20920 | 0.098047815 | -0.404217604 | 3.551457005 | 0.456303718 | NA          | NA |
| ASV_16s_20921 | 0.098047815 | -0.404217604 | 3.551457005 | 0.456303718 | NA          | NA |
| ASV_16s_20922 | 0.098047815 | -0.404217604 | 3.551457005 | 0.456303718 | NA          | NA |
| ASV_16s_20923 | 0.098047815 | -0.404217604 | 3.551457005 | 0.456303718 | NA          | NA |
| ASV_16s_20924 | 0.098047815 | -0.404217604 | 3.551457005 | 0.456303718 | NA          | NA |
| ASV_16s_20925 | 0.098047815 | -0.404217604 | 3.551457005 | 0.456303718 | NA          | NA |
| ASV_16s_20926 | 0.098047815 | -0.404217604 | 3.551457005 | 0.456303718 | NA          | NA |
| ASV_16s_20927 | 0.167281655 | 1.148714333  | 3.551308925 | 0.44220191  | 0.999631806 | NA |
| ASV_16s_20928 | 0.031238661 | -0.143107748 | 3.551226026 | 0.120356366 | NA          | NA |
| ASV_16s_20929 | 0.031663614 | -0.042595858 | 3.551199398 | 0.169746986 | 0.999985664 | NA |
| ASV_16s_20930 | 0.032230218 | 0.070636385  | 3.55121698  | 0.182403006 | 0.999981651 | NA |
| ASV_16s_20931 | 0.063465487 | 0.220277391  | 3.551031853 | 0.289258118 | NA          | NA |
| ASV_16s_20932 | 0.032938472 | 0.231570285  | 3.551328458 | 0.111781105 | NA          | NA |
| ASV_16s_20933 | 0.043547773 | 0.22534824   | 3.551192896 | 0.177439853 | NA          | NA |
| ASV_16s_20937 | 0.152909118 | 0.595998504  | 3.5507299   | 0.570550278 | NA          | NA |
| ASV_16s_20938 | 0.147991048 | 0.442001381  | 3.550737462 | 0.530099431 | 0.999328635 | NA |
| ASV_16s_20939 | 0.101172092 | 0.063728672  | 3.551891436 | 0.427952445 | 0.999669879 | NA |
| ASV_16s_20940 | 0.104247667 | 0.535150637  | 3.551964243 | 0.424938772 | 0.99967757  | NA |
| ASV_16s_20941 | 0.107532376 | 0.369285566  | 3.551842274 | 0.477206278 | 0.999525737 | NA |

|               |             |              |             |             |             |    |
|---------------|-------------|--------------|-------------|-------------|-------------|----|
| ASV_16s_20942 | 0.11739607  | 0.216777313  | 3.551691409 | 0.596623127 | 0.999010186 | NA |
| ASV_16s_20943 | 0.131465847 | -0.448400926 | 3.551346303 | 0.527697333 | 0.999338612 | NA |
| ASV_16s_20944 | 0.126212784 | -0.430518475 | 3.551389452 | 0.511769237 | 0.999402236 | NA |
| ASV_16s_20945 | 0.109190405 | -0.039659215 | 3.551567057 | 0.364456463 | 0.999807165 | NA |
| ASV_16s_20946 | 0.10668084  | 0.026345214  | 3.551847751 | 0.451754278 | 0.999604667 | NA |
| ASV_16s_20947 | 0.149540278 | -0.04835156  | 3.55140844  | 0.794661008 | 0.997498058 | NA |
| ASV_16s_20948 | 0.112432104 | 0.308960228  | 3.551717603 | 0.57639884  | 0.999115886 | NA |
| ASV_16s_20949 | 0.13880068  | -0.448475294 | 3.551217849 | 0.613937193 | 0.9989132   | NA |
| ASV_16s_20950 | 0.127312321 | 1.064113643  | 3.551364763 | 0.410249835 | 0.999713303 | NA |
| ASV_16s_20951 | 0.125435553 | -0.380853175 | 3.551236056 | 0.562082364 | 0.99918592  | NA |
| ASV_16s_20952 | 0.130581036 | -0.397451046 | 3.551181574 | 0.581427232 | 0.999090354 | NA |
| ASV_16s_20953 | 0.126861421 | -0.01776025  | 3.551201829 | 0.547477311 | 0.999253402 | NA |
| ASV_16s_20954 | 0.129702924 | -0.367871549 | 3.551163176 | 0.589936041 | 0.999046027 | NA |
| ASV_16s_20955 | 0.13143988  | -0.348428606 | 3.551143405 | 0.605045555 | 0.998963768 | NA |
| ASV_16s_20956 | 0.130206665 | -0.34798656  | 3.5511561   | 0.599273937 | 0.998995731 | NA |
| ASV_16s_20957 | 0.123786592 | -0.312687884 | 3.551188638 | 0.579842032 | 0.999098456 | NA |
| ASV_16s_20958 | 0.103771377 | 0.330931763  | 3.551892021 | 0.413673051 | 0.999705232 | NA |
| ASV_16s_20959 | 0.103771377 | 0.330931763  | 3.551892021 | 0.413673051 | 0.999705232 | NA |
| ASV_16s_20960 | 0.119439659 | -0.283382121 | 3.551215538 | 0.567231795 | 0.999161179 | NA |
| ASV_16s_20961 | 0.122561671 | -0.284449354 | 3.551185515 | 0.581450986 | 0.999090232 | NA |
| ASV_16s_20962 | 0.139183412 | 0.404315722  | 3.551257204 | 0.412168691 | 0.999708798 | NA |
| ASV_16s_20963 | 0.125267826 | -0.535616714 | 3.55115109  | 0.454654697 | 0.999596163 | NA |
| ASV_16s_20964 | 0.119514854 | -0.224541721 | 3.551224896 | 0.576119884 | 0.999117288 | NA |
| ASV_16s_20965 | 0.116921165 | 0.674743583  | 3.551382131 | 0.534899857 | 0.999308393 | NA |
| ASV_16s_20966 | 0.127367674 | -0.165641897 | 3.551184888 | 0.612689801 | 0.998920392 | NA |
| ASV_16s_20967 | 0.12263801  | -0.578300617 | 3.551130266 | 0.415859761 | 0.999699995 | NA |
| ASV_16s_20968 | 0.126295714 | -0.110657633 | 3.551176725 | 0.613739651 | 0.998914341 | NA |
| ASV_16s_20969 | 0.140510594 | -0.613712194 | 3.551444392 | 0.365135247 | 0.999805956 | NA |
| ASV_16s_20970 | 0.109651145 | 0.683485514  | 3.55141688  | 0.548455545 | 0.999249005 | NA |
| ASV_16s_20971 | 0.129560216 | 0.581827535  | 3.551117173 | 0.467749517 | 0.999556211 | NA |
| ASV_16s_20972 | 0.13605817  | 0.049849051  | 3.551135327 | 0.651496155 | 0.998681296 | NA |
| ASV_16s_20973 | 0.118848581 | 1.036590478  | 3.551334655 | 0.36421206  | 0.999807599 | NA |
| ASV_16s_20974 | 0.122749541 | 0.102085635  | 3.5511318   | 0.627359196 | 0.998833768 | NA |
| ASV_16s_20975 | 0.114876384 | 0.883559386  | 3.551270994 | 0.360110743 | 0.999814783 | NA |
| ASV_16s_20976 | 0.149439933 | 0.047518502  | 3.55174241  | 0.504531177 | 0.99942972  | NA |
| ASV_16s_20977 | 0.128622619 | 0.998713161  | 3.551502819 | 0.480299452 | NA          | NA |
| ASV_16s_20978 | 0.128622619 | 0.998713161  | 3.551502819 | 0.480299452 | NA          | NA |
| ASV_16s_20979 | 0.128622619 | 0.998713161  | 3.551502819 | 0.480299452 | NA          | NA |
| ASV_16s_20980 | 0.128622619 | 0.998713161  | 3.551502819 | 0.480299452 | NA          | NA |
| ASV_16s_20981 | 0.128622619 | 0.590069803  | 3.551556957 | 0.380487934 | 0.999777191 | NA |
| ASV_16s_20982 | 0.108544037 | -0.445530921 | 3.551694425 | 0.376501132 | 0.999784925 | NA |
| ASV_16s_20983 | 0.136282669 | 1.086151304  | 3.551339255 | 0.499466642 | NA          | NA |
| ASV_16s_20984 | 0.108835602 | 1.232851469  | 3.551504884 | 0.242908931 | 0.999951148 | NA |
| ASV_16s_20985 | 0.122141574 | 1.047738129  | 3.551426356 | 0.471758781 | NA          | NA |
| ASV_16s_20986 | 0.144248061 | 0.942520282  | 3.551229682 | 0.590623437 | 0.999042384 | NA |
| ASV_16s_20987 | 0.163515194 | 1.46501649   | 3.550972105 | 0.313094361 | 0.999884414 | NA |
| ASV_16s_20988 | 0.112064738 | 1.017369684  | 3.551487248 | 0.445621954 | NA          | NA |
| ASV_16s_20989 | 0.17707875  | 1.174550638  | 3.551114895 | 0.590834848 | NA          | NA |
| ASV_16s_20990 | 0.106245073 | 0.335282417  | 3.551953999 | 0.464633358 | NA          | NA |
| ASV_16s_20991 | 0.106245073 | 0.335282417  | 3.551953999 | 0.464633358 | NA          | NA |
| ASV_16s_20992 | 0.106245073 | 0.335282417  | 3.551953999 | 0.464633358 | NA          | NA |
| ASV_16s_20993 | 0.106245073 | 0.335282417  | 3.551953999 | 0.464633358 | NA          | NA |
| ASV_16s_20994 | 0.106245073 | 0.335282417  | 3.551953999 | 0.464633358 | NA          | NA |
| ASV_16s_20995 | 0.122520196 | 0.340827029  | 3.551907478 | 0.499588081 | 0.999447988 | NA |
| ASV_16s_20996 | 0.128622619 | 0.342851832  | 3.551887949 | 0.514708393 | NA          | NA |
| ASV_16s_20997 | 0.128622619 | 0.342851832  | 3.551887949 | 0.514708393 | NA          | NA |
| ASV_16s_20998 | 0.128622619 | 0.342851832  | 3.551887949 | 0.514708393 | NA          | NA |
| ASV_16s_20999 | 0.128622619 | 0.342851832  | 3.551887949 | 0.514708393 | NA          | NA |
| ASV_16s_21000 | 0.128622619 | 0.342851832  | 3.551887949 | 0.514708393 | NA          | NA |
| ASV_16s_21001 | 0.142262131 | 0.347517696  | 3.55184201  | 0.54706936  | NA          | NA |
| ASV_16s_21002 | 0.142262131 | 0.347517696  | 3.55184201  | 0.54706936  | NA          | NA |
| ASV_16s_21003 | 0.082333585 | 0.327295136  | 3.552013018 | 0.392995678 | 0.999751686 | NA |
| ASV_16s_21004 | 0.082333585 | 0.327295136  | 3.552013018 | 0.392995678 | 0.999751686 | NA |
| ASV_16s_21005 | 0.082333585 | 0.327295136  | 3.552013018 | 0.392995678 | 0.999751686 | NA |
| ASV_16s_21006 | 0.082333585 | 0.327295136  | 3.552013018 | 0.392995678 | 0.999751686 | NA |
| ASV_16s_21007 | 0.082333585 | 0.327295136  | 3.552013018 | 0.392995678 | 0.999751686 | NA |
| ASV_16s_21008 | 0.10055165  | -0.071234801 | 3.551351311 | 0.531560806 | 0.999322516 | NA |

|               |             |              |             |             |             |    |
|---------------|-------------|--------------|-------------|-------------|-------------|----|
| ASV_16s_21009 | 0.111481511 | 0.337056084  | 3.551941973 | 0.477948487 | NA          | NA |
| ASV_16s_21010 | 0.111481511 | 0.337056084  | 3.551941973 | 0.477948487 | NA          | NA |
| ASV_16s_21011 | 0.111481511 | 0.337056084  | 3.551941973 | 0.477948487 | NA          | NA |
| ASV_16s_21012 | 0.111481511 | 0.337056084  | 3.551941973 | 0.477948487 | NA          | NA |
| ASV_16s_21013 | 0.132558671 | 0.333533383  | 3.552046192 | 0.296566176 | 0.999903786 | NA |
| ASV_16s_21014 | 0.149645401 | 0.349566595  | 3.551809367 | 0.565364999 | NA          | NA |
| ASV_16s_21015 | 0.137760437 | -0.478750212 | 3.551229497 | 0.540622334 | NA          | NA |
| ASV_16s_21016 | 0.137760437 | -0.478750212 | 3.551229497 | 0.540622334 | NA          | NA |
| ASV_16s_21017 | 0.118368778 | -0.435467187 | 3.551385413 | 0.498681901 | NA          | NA |
| ASV_16s_21018 | 0.082227475 | -0.327430273 | 3.551699436 | 0.39992495  | NA          | NA |
| ASV_16s_21019 | 0.082227475 | -0.327430273 | 3.551699436 | 0.39992495  | NA          | NA |
| ASV_16s_21020 | 0.082227475 | -0.327430273 | 3.551699436 | 0.39992495  | NA          | NA |
| ASV_16s_21021 | 0.082227475 | -0.327430273 | 3.551699436 | 0.39992495  | NA          | NA |
| ASV_16s_21022 | 0.082227475 | -0.327430273 | 3.551699436 | 0.39992495  | NA          | NA |
| ASV_16s_21023 | 0.120964205 | -0.441867712 | 3.551363446 | 0.503963753 | NA          | NA |
| ASV_16s_21024 | 0.107630545 | -0.407735123 | 3.551479113 | 0.475340683 | NA          | NA |
| ASV_16s_21025 | 0.107630545 | -0.407735123 | 3.551479113 | 0.475340683 | NA          | NA |
| ASV_16s_21026 | 0.107630545 | -0.407735123 | 3.551479113 | 0.475340683 | NA          | NA |
| ASV_16s_21027 | 0.148300142 | 1.116030863  | 3.5512703   | 0.524866013 | NA          | NA |
| ASV_16s_21028 | 0.143523359 | 0.969339388  | 3.551657721 | 0.424660324 | 0.999678274 | NA |
| ASV_16s_21029 | 0.121912646 | 1.0872589    | 3.551173197 | 0.413257499 | NA          | NA |
| ASV_16s_21030 | 0.121912646 | 1.0872589    | 3.551173197 | 0.413257499 | NA          | NA |
| ASV_16s_21031 | 0.063626657 | 0.884130008  | 3.551643899 | 0.245800091 | 0.99994914  | NA |
| ASV_16s_21032 | 0.063626657 | 0.884130008  | 3.551643899 | 0.245800091 | 0.99994914  | NA |
| ASV_16s_21033 | 0.063626657 | 0.884130008  | 3.551643899 | 0.245800091 | 0.99994914  | NA |
| ASV_16s_21034 | 0.109078505 | 1.050782118  | 3.551259648 | 0.380288656 | NA          | NA |
| ASV_16s_21035 | 0.109078505 | 1.050782118  | 3.551259648 | 0.380288656 | NA          | NA |
| ASV_16s_21036 | 0.109078505 | 1.050782118  | 3.551259648 | 0.380288656 | NA          | NA |
| ASV_16s_21037 | 0.127950377 | 0.359999619  | 3.551571471 | 0.45041546  | NA          | NA |
| ASV_16s_21038 | 0.127950377 | 0.359999619  | 3.551571471 | 0.45041546  | NA          | NA |
| ASV_16s_21039 | 0.137878071 | 0.364424209  | 3.55152253  | 0.472911837 | NA          | NA |
| ASV_16s_21040 | 0.137878071 | 0.364424209  | 3.55152253  | 0.472911837 | NA          | NA |
| ASV_16s_21041 | 0.124708249 | 0.358434797  | 3.551584854 | 0.44330313  | 0.999628745 | NA |
| ASV_16s_21042 | 0.12507674  | 0.35861796   | 3.551583278 | 0.4441224   | NA          | NA |
| ASV_16s_21043 | 0.12507674  | 0.35861796   | 3.551583278 | 0.4441224   | NA          | NA |
| ASV_16s_21044 | 0.12507674  | 0.35861796   | 3.551583278 | 0.4441224   | NA          | NA |
| ASV_16s_21045 | 0.113564554 | 0.352852693  | 3.551634338 | 0.420415172 | NA          | NA |
| ASV_16s_21046 | 0.113564554 | 0.352852693  | 3.551634338 | 0.420415172 | NA          | NA |
| ASV_16s_21047 | 0.113564554 | 0.352852693  | 3.551634338 | 0.420415172 | NA          | NA |
| ASV_16s_21048 | 0.113564554 | 0.352852693  | 3.551634338 | 0.420415172 | NA          | NA |
| ASV_16s_21049 | 0.122308211 | 0.012860984  | 3.551141307 | 0.631611787 | 0.998807811 | NA |
| ASV_16s_21050 | 0.093746198 | 0.345883639  | 3.551713316 | 0.368480279 | NA          | NA |
| ASV_16s_21051 | 0.093746198 | 0.345883639  | 3.551713316 | 0.368480279 | NA          | NA |
| ASV_16s_21052 | 0.101430063 | 0.347272989  | 3.551689805 | 0.390446971 | NA          | NA |
| ASV_16s_21053 | 0.101430063 | 0.347272989  | 3.551689805 | 0.390446971 | NA          | NA |
| ASV_16s_21054 | 0.101430063 | 0.347272989  | 3.551689805 | 0.390446971 | NA          | NA |
| ASV_16s_21055 | 0.128622619 | -0.473683567 | 3.550989206 | 0.453918495 | NA          | NA |
| ASV_16s_21056 | 0.139795526 | -0.493083114 | 3.550874443 | 0.478456764 | NA          | NA |
| ASV_16s_21057 | 0.180327645 | -0.532802543 | 3.550496684 | 0.578145679 | NA          | NA |
| ASV_16s_21058 | 0.180327645 | -0.532802543 | 3.550496684 | 0.578145679 | NA          | NA |
| ASV_16s_21059 | 0.180327645 | -0.532802543 | 3.550496684 | 0.578145679 | NA          | NA |
| ASV_16s_21060 | 0.151684998 | -0.312194725 | 3.551052463 | 0.593606024 | 0.999026467 | NA |
| ASV_16s_21061 | 0.117710251 | -0.394154668 | 3.551177108 | 0.354848752 | 0.999823726 | NA |
| ASV_16s_21062 | 0.069210181 | -0.303000662 | 3.551482252 | 0.294005407 | 0.99990657  | NA |
| ASV_16s_21063 | 0.113564554 | -0.441964742 | 3.551135373 | 0.423923454 | NA          | NA |
| ASV_16s_21064 | 0.05028302  | 0.820068555  | 3.551767106 | 0.199798057 | 0.999974931 | NA |
| ASV_16s_21065 | 0.05028302  | 0.820068555  | 3.551767106 | 0.199798057 | 0.999974931 | NA |
| ASV_16s_21066 | 0.05028302  | 0.820068555  | 3.551767106 | 0.199798057 | 0.999974931 | NA |
| ASV_16s_21067 | 0.113564554 | -0.078018157 | 3.550995157 | 0.668769838 | NA          | NA |
| ASV_16s_21068 | 0.113564554 | -0.078018157 | 3.550995157 | 0.668769838 | NA          | NA |
| ASV_16s_21069 | 0.113564554 | -0.078018157 | 3.550995157 | 0.668769838 | NA          | NA |
| ASV_16s_21070 | 0.113564554 | -0.078018157 | 3.550995157 | 0.668769838 | NA          | NA |
| ASV_16s_21071 | 0.096837787 | -0.077742211 | 3.551077476 | 0.603817693 | NA          | NA |
| ASV_16s_21072 | 0.096837787 | -0.077742211 | 3.551077476 | 0.603817693 | NA          | NA |
| ASV_16s_21073 | 0.096837787 | -0.077742211 | 3.551077476 | 0.603817693 | NA          | NA |
| ASV_16s_21074 | 0.096837787 | -0.077742211 | 3.551077476 | 0.603817693 | NA          | NA |
| ASV_16s_21075 | 0.096837787 | -0.077742211 | 3.551077476 | 0.603817693 | NA          | NA |



|               |             |              |             |             |             |    |
|---------------|-------------|--------------|-------------|-------------|-------------|----|
| ASV_16s_21076 | 0.096837787 | -0.077742211 | 3.551077476 | 0.603817693 | NA          | NA |
| ASV_16s_21077 | 0.096837787 | -0.077742211 | 3.551077476 | 0.603817693 | NA          | NA |
| ASV_16s_21078 | 0.096837787 | -0.077742211 | 3.551077476 | 0.603817693 | NA          | NA |
| ASV_16s_21079 | 0.096837787 | -0.077742211 | 3.551077476 | 0.603817693 | NA          | NA |
| ASV_16s_21080 | 0.096837787 | -0.077742211 | 3.551077476 | 0.603817693 | NA          | NA |
| ASV_16s_21081 | 0.102530747 | -0.077844856 | 3.551046474 | 0.625684028 | 0.998843887 | NA |
| ASV_16s_21082 | 0.109258791 | -0.077955089 | 3.551013958 | 0.654185289 | NA          | NA |
| ASV_16s_21083 | 0.063465487 | 0.220277391  | 3.551031853 | 0.289258118 | NA          | NA |
| ASV_16s_21084 | 0.066646587 | 0.220260943  | 3.55101028  | 0.305691992 | 0.999893395 | NA |
| ASV_16s_21085 | 0.072092384 | 0.220236456  | 3.550977729 | 0.332934614 | NA          | NA |
| ASV_16s_21086 | 0.072092384 | 0.220236456  | 3.550977729 | 0.332934614 | NA          | NA |
| ASV_16s_21087 | 0.0996243   | 0.233273728  | 3.551297679 | 0.282593683 | 0.999918299 | NA |
| ASV_16s_21088 | 0.125119323 | 0.310954903  | 3.551110143 | 0.68602996  | NA          | NA |
| ASV_16s_21089 | 0.125119323 | 0.310954903  | 3.551110143 | 0.68602996  | NA          | NA |
| ASV_16s_21090 | 0.125119323 | 0.310954903  | 3.551110143 | 0.68602996  | NA          | NA |
| ASV_16s_21091 | 0.107287346 | 0.310960465  | 3.551196142 | 0.627566094 | NA          | NA |
| ASV_16s_21092 | 0.122652894 | 0.310955577  | 3.55112056  | 0.678039862 | NA          | NA |
| ASV_16s_21093 | 0.075943637 | 0.595535516  | 3.550911244 | 0.30136184  | NA          | NA |
| ASV_16s_21094 | 0.075943637 | 0.595535516  | 3.550911244 | 0.30136184  | NA          | NA |
| ASV_16s_21095 | 0.075943637 | 0.595535516  | 3.550911244 | 0.30136184  | NA          | NA |
| ASV_16s_21096 | 0.09881986  | -0.066135452 | 3.55114505  | 0.60587454  | 0.998959122 | NA |
| ASV_16s_21097 | 0.132025374 | 1.172247639  | 3.551459105 | 0.315967361 | 0.999880792 | NA |
| ASV_16s_21098 | 0.112355972 | -0.065337993 | 3.551078372 | 0.670670041 | 0.998551085 | NA |
| ASV_16s_21099 | 0.099810896 | -0.064993416 | 3.551187159 | 0.622217919 | 0.998864639 | NA |
| ASV_16s_21100 | 0.126610559 | 1.029745065  | 3.551308556 | 0.464974058 | 0.999564895 | NA |
| ASV_16s_21101 | 0.158251344 | 0.73806981   | 3.551396683 | 0.655477063 | 0.998654934 | NA |
| ASV_16s_21102 | 0.14120654  | 0.670633652  | 3.55112529  | 0.778191033 | 0.997660203 | NA |
| ASV_16s_21103 | 0.197688334 | 0.36753931   | 3.551651728 | 0.525400526 | 0.999348057 | NA |
| ASV_16s_21104 | 0.111751681 | -0.066878161 | 3.551153051 | 0.689165686 | 0.998417605 | NA |
| ASV_16s_21105 | 0.122613705 | 0.343344707  | 3.552005057 | 0.41888679  | 0.999692641 | NA |
| ASV_16s_21106 | 0.10179297  | -0.060344345 | 3.551299247 | 0.650736368 | 0.998686288 | NA |
| ASV_16s_21107 | 0.068485502 | 0.506374484  | 3.551192113 | 0.345501443 | 0.999838869 | NA |
| ASV_16s_21108 | 0.103279525 | -0.048477257 | 3.551418263 | 0.658366513 | 0.99863558  | NA |
| ASV_16s_21109 | 0.103279525 | -0.048477257 | 3.551418263 | 0.658366513 | 0.99863558  | NA |
| ASV_16s_21110 | 0.098171568 | 0.184338899  | 3.55176219  | 0.510294879 | 0.999407906 | NA |
| ASV_16s_21111 | 0.130209138 | 0.355012409  | 3.55117906  | 0.722609586 | 0.99815592  | NA |
| ASV_16s_21112 | 0.097008275 | 0.976802253  | 3.551771821 | 0.355209377 | 0.999823123 | NA |
| ASV_16s_21113 | 0.147382418 | -0.720295807 | 3.551413119 | 0.372196431 | 0.999793066 | NA |
| ASV_16s_21114 | 0.10476608  | -0.012517067 | 3.551564619 | 0.654164672 | 0.998663663 | NA |
| ASV_16s_21115 | 0.108906415 | -0.028194187 | 3.551485545 | 0.671261569 | 0.998546937 | NA |
| ASV_16s_21116 | 0.114769486 | 0.325840707  | 3.551556934 | 0.458512639 | 0.999584659 | NA |
| ASV_16s_21117 | 0.109737378 | 0.105362378  | 3.551592101 | 0.654634464 | 0.998660543 | NA |
| ASV_16s_21118 | 0.108840344 | 0.105362378  | 3.551592101 | 0.652044897 | 0.998677683 | NA |
| ASV_16s_21119 | 0.108840344 | 0.105362378  | 3.551592101 | 0.652044897 | 0.998677683 | NA |
| ASV_16s_21120 | 0.153557257 | 0.292510479  | 3.551767351 | 0.574326038 | 0.999126268 | NA |
| ASV_16s_21121 | 0.148300142 | 0.293303611  | 3.551782548 | 0.560944342 | NA          | NA |
| ASV_16s_21122 | 0.148300142 | 0.293303611  | 3.551782548 | 0.560944342 | NA          | NA |
| ASV_16s_21123 | 0.125846105 | 0.992013445  | 3.551522236 | 0.4750941   | NA          | NA |
| ASV_16s_21124 | 0.125846105 | 0.992013445  | 3.551522236 | 0.4750941   | NA          | NA |
| ASV_16s_21125 | 0.121237056 | 0.90703393   | 3.551519961 | 0.449421244 | 0.999611417 | NA |
| ASV_16s_21126 | 0.121237056 | 0.90703393   | 3.551519961 | 0.449421244 | 0.999611417 | NA |
| ASV_16s_21127 | 0.103248908 | 0.284236911  | 3.551737943 | 0.448600509 | 0.999613773 | NA |
| ASV_16s_21128 | 0.192526921 | 0.279446467  | 3.551561827 | 0.697126037 | NA          | NA |
| ASV_16s_21129 | 0.081639893 | 0.286438252  | 3.551804877 | 0.393542146 | 0.999750528 | NA |
| ASV_16s_21130 | 0.029291933 | 0.299541861  | 3.551953116 | 0.17521716  | 0.999984014 | NA |
| ASV_16s_21131 | 0.160591524 | -0.475918616 | 3.55129958  | 0.596985426 | NA          | NA |
| ASV_16s_21132 | 0.095483395 | -0.332217825 | 3.551573433 | 0.438071939 | 0.999643135 | NA |
| ASV_16s_21133 | 0.096238934 | 0.850708737  | 3.551625287 | 0.383779007 | 0.999770664 | NA |
| ASV_16s_21134 | 0.229185261 | -0.00167603  | 3.55086084  | 1.004958252 | 0.994748156 | NA |
| ASV_16s_21135 | 0.226417251 | 1.247433309  | 3.550892093 | 0.716903795 | NA          | NA |
| ASV_16s_21136 | 0.155911167 | 0.930218132  | 3.550912661 | 0.705659292 | 0.998291875 | NA |
| ASV_16s_21137 | 0.132405864 | 0.32371614   | 3.551521536 | 0.437875464 | 0.999643668 | NA |
| ASV_16s_21138 | 0.142618173 | 1.13901799   | 3.551060232 | 0.454133912 | NA          | NA |
| ASV_16s_21139 | 0.142618173 | 1.13901799   | 3.551060232 | 0.454133912 | NA          | NA |
| ASV_16s_21140 | 0.129301931 | 1.00472201   | 3.55122152  | 0.515404813 | 0.999388097 | NA |
| ASV_16s_21141 | 0.081268483 | -0.077384996 | 3.551184221 | 0.534710826 | NA          | NA |
| ASV_16s_21142 | 0.081268483 | -0.077384996 | 3.551184221 | 0.534710826 | NA          | NA |

|               |             |              |             |             |             |    |
|---------------|-------------|--------------|-------------|-------------|-------------|----|
| ASV_16s_21143 | 0.081268483 | -0.077384996 | 3.551184221 | 0.534710826 | NA          | NA |
| ASV_16s_21144 | 0.081268483 | -0.077384996 | 3.551184221 | 0.534710826 | NA          | NA |
| ASV_16s_21145 | 0.186904216 | -0.423504028 | 3.550821893 | 0.747262444 | 0.997945657 | NA |
| ASV_16s_21146 | 0.170785798 | 0.395317813  | 3.55104307  | 1.215354163 | 0.990569064 | NA |
| ASV_16s_21147 | 0.142822088 | -0.414494571 | 3.551026687 | 0.596228276 | 0.999012327 | NA |
| ASV_16s_21148 | 0.171474848 | 0.91945444   | 3.550975148 | 0.703577894 | 0.998308095 | NA |
| ASV_16s_21149 | 0.179388153 | -0.028624926 | 3.55097209  | 0.949517257 | NA          | NA |
| ASV_16s_21150 | 0.179388153 | -0.028624926 | 3.55097209  | 0.949517257 | NA          | NA |
| ASV_16s_21151 | 0.179388153 | -0.028624926 | 3.55097209  | 0.949517257 | NA          | NA |
| ASV_16s_21152 | 0.123672958 | 0.633138602  | 3.551382584 | 0.739061872 | 0.998017271 | NA |
| ASV_16s_21153 | 0.122515206 | -0.072964126 | 3.551004639 | 0.721036253 | NA          | NA |
| ASV_16s_21154 | 0.089480158 | -0.072333806 | 3.551183995 | 0.596158388 | NA          | NA |
| ASV_16s_21155 | 0.089480158 | -0.072333806 | 3.551183995 | 0.596158388 | NA          | NA |
| ASV_16s_21156 | 0.089480158 | -0.072333806 | 3.551183995 | 0.596158388 | NA          | NA |
| ASV_16s_21157 | 0.089480158 | -0.072333806 | 3.551183995 | 0.596158388 | NA          | NA |
| ASV_16s_21158 | 0.089480158 | -0.072333806 | 3.551183995 | 0.596158388 | NA          | NA |
| ASV_16s_21159 | 0.099283489 | -0.072563626 | 3.551118535 | 0.630463428 | 0.998814858 | NA |
| ASV_16s_21160 | 0.087872349 | -0.072291239 | 3.551196127 | 0.588988149 | NA          | NA |
| ASV_16s_21161 | 0.087872349 | -0.072291239 | 3.551196127 | 0.588988149 | NA          | NA |
| ASV_16s_21162 | 0.087872349 | -0.072291239 | 3.551196127 | 0.588988149 | NA          | NA |
| ASV_16s_21163 | 0.087872349 | -0.072291239 | 3.551196127 | 0.588988149 | NA          | NA |
| ASV_16s_21164 | 0.087872349 | -0.072291239 | 3.551196127 | 0.588988149 | NA          | NA |
| ASV_16s_21165 | 0.087872349 | -0.072291239 | 3.551196127 | 0.588988149 | NA          | NA |
| ASV_16s_21166 | 0.113855516 | 0.299535192  | 3.551218595 | 0.701438535 | 0.998324659 | NA |
| ASV_16s_21167 | 0.148300142 | -0.073262246 | 3.550919798 | 0.806144724 | NA          | NA |
| ASV_16s_21168 | 0.148300142 | -0.073262246 | 3.550919798 | 0.806144724 | NA          | NA |
| ASV_16s_21169 | 0.148300142 | -0.073262246 | 3.550919798 | 0.806144724 | NA          | NA |
| ASV_16s_21170 | 0.14982949  | 0.473958714  | 3.551327956 | 0.776443646 | 0.997676987 | NA |
| ASV_16s_21171 | 0.109028563 | -0.072752281 | 3.551064853 | 0.677414001 | NA          | NA |
| ASV_16s_21172 | 0.109028563 | -0.072752281 | 3.551064853 | 0.677414001 | NA          | NA |
| ASV_16s_21173 | 0.109028563 | -0.072752281 | 3.551064853 | 0.677414001 | NA          | NA |
| ASV_16s_21174 | 0.127913448 | 0.304696541  | 3.551053343 | 0.759095462 | 0.997839336 | NA |
| ASV_16s_21175 | 0.117208894 | 0.334606781  | 3.551785331 | 0.526199074 | 0.999344784 | NA |
| ASV_16s_21176 | 0.117208894 | 0.334606781  | 3.551785331 | 0.526199074 | 0.999344784 | NA |
| ASV_16s_21177 | 0.120838505 | 0.320433166  | 3.551315109 | 0.598614089 | NA          | NA |
| ASV_16s_21178 | 0.320025623 | 0.360377646  | 3.550912108 | 1.469726884 | NA          | NA |
| ASV_16s_21179 | 0.108730226 | 0.359591738  | 3.551516736 | 0.694679794 | NA          | NA |
| ASV_16s_21180 | 0.108730226 | 0.359591738  | 3.551516736 | 0.694679794 | NA          | NA |
| ASV_16s_21181 | 0.108730226 | 0.359591738  | 3.551516736 | 0.694679794 | NA          | NA |
| ASV_16s_21182 | 0.108730226 | 0.359591738  | 3.551516736 | 0.694679794 | NA          | NA |
| ASV_16s_21183 | 0.108730226 | 0.359591738  | 3.551516736 | 0.694679794 | NA          | NA |
| ASV_16s_21184 | 0.108730226 | 0.359591738  | 3.551516736 | 0.694679794 | NA          | NA |
| ASV_16s_21185 | 0.108730226 | 0.359591738  | 3.551516736 | 0.694679794 | NA          | NA |
| ASV_16s_21186 | 0.108730226 | 0.359591738  | 3.551516736 | 0.694679794 | NA          | NA |
| ASV_16s_21187 | 0.108730226 | 0.359591738  | 3.551516736 | 0.694679794 | NA          | NA |
| ASV_16s_21188 | 0.108730226 | 0.359591738  | 3.551516736 | 0.694679794 | NA          | NA |
| ASV_16s_21189 | 0.108730226 | 0.359591738  | 3.551516736 | 0.694679794 | NA          | NA |
| ASV_16s_21190 | 0.108730226 | 0.359591738  | 3.551516736 | 0.694679794 | NA          | NA |
| ASV_16s_21191 | 0.108730226 | 0.359591738  | 3.551516736 | 0.694679794 | NA          | NA |
| ASV_16s_21192 | 0.108730226 | 0.359591738  | 3.551516736 | 0.694679794 | NA          | NA |
| ASV_16s_21193 | 0.108730226 | 0.359591738  | 3.551516736 | 0.694679794 | NA          | NA |
| ASV_16s_21194 | 0.108730226 | 0.359591738  | 3.551516736 | 0.694679794 | NA          | NA |
| ASV_16s_21195 | 0.108730226 | 0.359591738  | 3.551516736 | 0.694679794 | NA          | NA |
| ASV_16s_21196 | 0.108730226 | 0.359591738  | 3.551516736 | 0.694679794 | NA          | NA |
| ASV_16s_21197 | 0.108730226 | 0.359591738  | 3.551516736 | 0.694679794 | NA          | NA |
| ASV_16s_21198 | 0.108730226 | 0.359591738  | 3.551516736 | 0.694679794 | NA          | NA |
| ASV_16s_21199 | 0.108730226 | 0.359591738  | 3.551516736 | 0.694679794 | NA          | NA |
| ASV_16s_21200 | 0.108730226 | 0.359591738  | 3.551516736 | 0.694679794 | NA          | NA |
| ASV_16s_21201 | 0.108730226 | 0.359591738  | 3.551516736 | 0.694679794 | NA          | NA |
| ASV_16s_21202 | 0.108730226 | 0.359591738  | 3.551516736 | 0.694679794 | NA          | NA |
| ASV_16s_21203 | 0.108730226 | 0.359591738  | 3.551516736 | 0.694679794 | NA          | NA |
| ASV_16s_21204 | 0.140881165 | 0.315940029  | 3.55109578  | 0.761154288 | NA          | NA |
| ASV_16s_21205 | 0.128006932 | 0.566827751  | 3.551085988 | 0.885269585 | 0.996473281 | NA |
| ASV_16s_21206 | 0.121777248 | 0.315940157  | 3.551174819 | 0.697997118 | NA          | NA |
| ASV_16s_21207 | 0.129972036 | 0.460052174  | 3.551079814 | 0.955265751 | 0.995518247 | NA |
| ASV_16s_21208 | 0.118355292 | 0.315940079  | 3.551191646 | 0.687036409 | 0.998433372 | NA |
| ASV_16s_21209 | 0.116644314 | 0.315940198  | 3.551200428 | 0.681603965 | 0.998473125 | NA |

|               |             |             |             |             |             |    |
|---------------|-------------|-------------|-------------|-------------|-------------|----|
| ASV_16s_21210 | 0.163828233 | 0.315939758 | 3.551025093 | 0.840342688 | 0.997010114 | NA |
| ASV_16s_21211 | 0.115275532 | 0.31594021  | 3.551207637 | 0.677281848 | 0.998504268 | NA |
| ASV_16s_21212 | 0.189058824 | 0.315939798 | 3.55096696  | 0.931121002 | NA          | NA |
| ASV_16s_21213 | 0.189058824 | 0.315939798 | 3.55096696  | 0.931121002 | NA          | NA |
| ASV_16s_21214 | 0.189058824 | 0.315939798 | 3.55096696  | 0.931121002 | NA          | NA |
| ASV_16s_21215 | 0.13872931  | 0.315939958 | 3.551103712 | 0.753640755 | 0.997888788 | NA |
| ASV_16s_21216 | 0.113564554 | 0.315940224 | 3.551216889 | 0.671909828 | NA          | NA |
| ASV_16s_21217 | 0.113564554 | 0.315940224 | 3.551216889 | 0.671909828 | NA          | NA |
| ASV_16s_21218 | 0.113564554 | 0.315940224 | 3.551216889 | 0.671909828 | NA          | NA |
| ASV_16s_21219 | 0.113564554 | 0.315940224 | 3.551216889 | 0.671909828 | NA          | NA |
| ASV_16s_21220 | 0.113564554 | 0.315940224 | 3.551216889 | 0.671909828 | NA          | NA |
| ASV_16s_21221 | 0.113564554 | 0.315940224 | 3.551216889 | 0.671909828 | NA          | NA |
| ASV_16s_21222 | 0.113564554 | 0.315940224 | 3.551216889 | 0.671909828 | NA          | NA |
| ASV_16s_21223 | 0.113564554 | 0.315940224 | 3.551216889 | 0.671909828 | NA          | NA |
| ASV_16s_21224 | 0.113564554 | 0.315940224 | 3.551216889 | 0.671909828 | NA          | NA |
| ASV_16s_21225 | 0.113564554 | 0.315940224 | 3.551216889 | 0.671909828 | NA          | NA |
| ASV_16s_21226 | 0.113564554 | 0.315940224 | 3.551216889 | 0.671909828 | NA          | NA |
| ASV_16s_21227 | 0.152909118 | 0.595998504 | 3.5507299   | 0.570550278 | NA          | NA |
| ASV_16s_21228 | 0.10815173  | 0.686971545 | 3.551166273 | 0.574321842 | NA          | NA |
| ASV_16s_21229 | 0.10815173  | 0.686971545 | 3.551166273 | 0.574321842 | NA          | NA |
| ASV_16s_21230 | 0.10815173  | 0.686971545 | 3.551166273 | 0.574321842 | NA          | NA |
| ASV_16s_21231 | 0.10815173  | 0.686971545 | 3.551166273 | 0.574321842 | NA          | NA |
| ASV_16s_21232 | 0.10815173  | 0.686971545 | 3.551166273 | 0.574321842 | NA          | NA |
| ASV_16s_21233 | 0.195383665 | 0.687809728 | 3.550894533 | 0.846590568 | NA          | NA |
| ASV_16s_21234 | 0.202817798 | 0.733780371 | 3.551105711 | 0.935560061 | 0.995802158 | NA |
| ASV_16s_21235 | 0.176996254 | 1.058081495 | 3.551245119 | 0.658074297 | 0.998637545 | NA |
| ASV_16s_21236 | 0.177534918 | 0.733524192 | 3.551180394 | 0.854953408 | NA          | NA |
| ASV_16s_21237 | 0.177534918 | 0.733524192 | 3.551180394 | 0.854953408 | NA          | NA |
| ASV_16s_21238 | 0.153445533 | 1.018633702 | 3.551202257 | 0.579515446 | 0.999100119 | NA |
| ASV_16s_21239 | 0.177534918 | 0.733524192 | 3.551180394 | 0.854953408 | NA          | NA |
| ASV_16s_21240 | 0.161608186 | 0.733321577 | 3.551239382 | 0.805398855 | 0.997388465 | NA |
| ASV_16s_21241 | 0.158195315 | 0.733272956 | 3.551253545 | 0.794965179 | 0.997494996 | NA |
| ASV_16s_21242 | 0.150231949 | 0.732693762 | 3.551288086 | 0.770852031 | NA          | NA |
| ASV_16s_21243 | 0.150231949 | 0.732693762 | 3.551288086 | 0.770852031 | NA          | NA |
| ASV_16s_21244 | 0.150231949 | 0.732693762 | 3.551288086 | 0.770852031 | NA          | NA |
| ASV_16s_21245 | 0.150231949 | 0.732693762 | 3.551288086 | 0.770852031 | NA          | NA |
| ASV_16s_21246 | 0.150231949 | 0.732693762 | 3.551288086 | 0.770852031 | NA          | NA |
| ASV_16s_21247 | 0.150231949 | 0.732693762 | 3.551288086 | 0.770852031 | NA          | NA |
| ASV_16s_21248 | 0.150231949 | 0.732693762 | 3.551288086 | 0.770852031 | NA          | NA |
| ASV_16s_21249 | 0.150231949 | 0.732693762 | 3.551288086 | 0.770852031 | NA          | NA |
| ASV_16s_21250 | 0.150231949 | 0.732693762 | 3.551288086 | 0.770852031 | NA          | NA |
| ASV_16s_21251 | 0.150231949 | 0.732693762 | 3.551288086 | 0.770852031 | NA          | NA |
| ASV_16s_21252 | 0.150231949 | 0.732693762 | 3.551288086 | 0.770852031 | NA          | NA |
| ASV_16s_21253 | 0.150231949 | 0.732693762 | 3.551288086 | 0.770852031 | NA          | NA |
| ASV_16s_21254 | 0.150231949 | 0.732693762 | 3.551288086 | 0.770852031 | NA          | NA |
| ASV_16s_21255 | 0.150231949 | 0.732693762 | 3.551288086 | 0.770852031 | NA          | NA |
| ASV_16s_21256 | 0.224600552 | 0.733957028 | 3.551054607 | 1.007394659 | NA          | NA |
| ASV_16s_21257 | 0.074418247 | 0.673502816 | 3.551692167 | 0.496984373 | 0.999457449 | NA |
| ASV_16s_21258 | 0.074418247 | 0.673502816 | 3.551692167 | 0.496984373 | 0.999457449 | NA |
| ASV_16s_21259 | 0.074418247 | 0.673502816 | 3.551692167 | 0.496984373 | 0.999457449 | NA |
| ASV_16s_21260 | 0.13966704  | 0.69237302  | 3.551081871 | 0.699082949 | NA          | NA |
| ASV_16s_21261 | 0.13966704  | 0.69237302  | 3.551081871 | 0.699082949 | NA          | NA |
| ASV_16s_21262 | 0.13966704  | 0.69237302  | 3.551081871 | 0.699082949 | NA          | NA |
| ASV_16s_21263 | 0.13966704  | 0.69237302  | 3.551081871 | 0.699082949 | NA          | NA |
| ASV_16s_21264 | 0.13966704  | 0.69237302  | 3.551081871 | 0.699082949 | NA          | NA |
| ASV_16s_21265 | 0.140988031 | 0.692389712 | 3.551076951 | 0.702950859 | 0.998312961 | NA |
| ASV_16s_21266 | 0.141813651 | 0.692399989 | 3.551073923 | 0.705375189 | 0.998294095 | NA |
| ASV_16s_21267 | 0.141978775 | 0.69240203  | 3.551073321 | 0.705860684 | 0.9982903   | NA |
| ASV_16s_21268 | 0.123352986 | 0.692137796 | 3.551151248 | 0.648130351 | 0.998703314 | NA |
| ASV_16s_21269 | 0.142804395 | 0.692412167 | 3.551070334 | 0.708291278 | 0.998271216 | NA |
| ASV_16s_21270 | 0.143630015 | 0.69242219  | 3.551067381 | 0.710727025 | NA          | NA |
| ASV_16s_21271 | 0.143630015 | 0.69242219  | 3.551067381 | 0.710727025 | NA          | NA |
| ASV_16s_21272 | 0.143630015 | 0.69242219  | 3.551067381 | 0.710727025 | NA          | NA |
| ASV_16s_21273 | 0.143630015 | 0.69242219  | 3.551067381 | 0.710727025 | NA          | NA |
| ASV_16s_21274 | 0.143630015 | 0.69242219  | 3.551067381 | 0.710727025 | NA          | NA |
| ASV_16s_21275 | 0.143630015 | 0.69242219  | 3.551067381 | 0.710727025 | NA          | NA |
| ASV_16s_21276 | 0.143630015 | 0.69242219  | 3.551067381 | 0.710727025 | NA          | NA |

|               |             |              |             |             |             |    |
|---------------|-------------|--------------|-------------|-------------|-------------|----|
| ASV_16s_21277 | 0.148400938 | 0.692477928  | 3.551050962 | 0.724880008 | 0.998137181 | NA |
| ASV_16s_21278 | 0.127344556 | 0.692200797  | 3.551132658 | 0.660083965 | 0.998623988 | NA |
| ASV_16s_21279 | 0.126091829 | 0.692181441  | 3.551138369 | 0.656256171 | 0.998649733 | NA |
| ASV_16s_21280 | 0.134620935 | 0.692304814  | 3.551101586 | 0.681848887 | 0.998471347 | NA |
| ASV_16s_21281 | 0.113564554 | 0.691964873  | 3.551202306 | 0.618697292 | NA          | NA |
| ASV_16s_21282 | 0.113564554 | 0.691964873  | 3.551202306 | 0.618697292 | NA          | NA |
| ASV_16s_21283 | 0.113564554 | 0.691964873  | 3.551202306 | 0.618697292 | NA          | NA |
| ASV_16s_21284 | 0.113564554 | 0.691964873  | 3.551202306 | 0.618697292 | NA          | NA |
| ASV_16s_21285 | 0.113564554 | 0.691964873  | 3.551202306 | 0.618697292 | NA          | NA |
| ASV_16s_21286 | 0.113564554 | 0.691964873  | 3.551202306 | 0.618697292 | NA          | NA |
| ASV_16s_21287 | 0.113564554 | 0.691964873  | 3.551202306 | 0.618697292 | NA          | NA |
| ASV_16s_21288 | 0.135759461 | 0.692321546  | 3.551097044 | 0.68481637  | 0.9984497   | NA |
| ASV_16s_21289 | 0.093831296 | 0.299807533  | 3.551938819 | 0.428301189 | 0.999668981 | NA |
| ASV_16s_21290 | 0.093831296 | 0.299807533  | 3.551938819 | 0.428301189 | 0.999668981 | NA |
| ASV_16s_21291 | 0.093831296 | 0.299807533  | 3.551938819 | 0.428301189 | 0.999668981 | NA |
| ASV_16s_21292 | 0.093831296 | 0.299807533  | 3.551938819 | 0.428301189 | 0.999668981 | NA |
| ASV_16s_21293 | 0.093831296 | 0.299807533  | 3.551938819 | 0.428301189 | 0.999668981 | NA |
| ASV_16s_21294 | 0.093831296 | 0.299807533  | 3.551938819 | 0.428301189 | 0.999668981 | NA |
| ASV_16s_21295 | 0.093831296 | 0.299807533  | 3.551938819 | 0.428301189 | 0.999668981 | NA |
| ASV_16s_21296 | 0.093831296 | 0.299807533  | 3.551938819 | 0.428301189 | 0.999668981 | NA |
| ASV_16s_21297 | 0.093831296 | 0.299807533  | 3.551938819 | 0.428301189 | 0.999668981 | NA |
| ASV_16s_21298 | 0.093831296 | 0.299807533  | 3.551938819 | 0.428301189 | 0.999668981 | NA |
| ASV_16s_21299 | 0.093831296 | 0.299807533  | 3.551938819 | 0.428301189 | 0.999668981 | NA |
| ASV_16s_21300 | 0.093831296 | 0.299807533  | 3.551938819 | 0.428301189 | 0.999668981 | NA |
| ASV_16s_21301 | 0.093831296 | 0.299807533  | 3.551938819 | 0.428301189 | 0.999668981 | NA |
| ASV_16s_21302 | 0.093831296 | 0.299807533  | 3.551938819 | 0.428301189 | 0.999668981 | NA |
| ASV_16s_21303 | 0.093831296 | 0.299807533  | 3.551938819 | 0.428301189 | 0.999668981 | NA |
| ASV_16s_21304 | 0.093831296 | 0.299807533  | 3.551938819 | 0.428301189 | 0.999668981 | NA |
| ASV_16s_21305 | 0.093831296 | 0.299807533  | 3.551938819 | 0.428301189 | 0.999668981 | NA |
| ASV_16s_21306 | 0.093831296 | 0.299807533  | 3.551938819 | 0.428301189 | 0.999668981 | NA |
| ASV_16s_21307 | 0.093831296 | 0.299807533  | 3.551938819 | 0.428301189 | 0.999668981 | NA |
| ASV_16s_21308 | 0.093831296 | 0.299807533  | 3.551938819 | 0.428301189 | 0.999668981 | NA |
| ASV_16s_21309 | 0.093831296 | 0.299807533  | 3.551938819 | 0.428301189 | 0.999668981 | NA |
| ASV_16s_21310 | 0.093831296 | 0.299807533  | 3.551938819 | 0.428301189 | 0.999668981 | NA |
| ASV_16s_21311 | 0.093831296 | 0.299807533  | 3.551938819 | 0.428301189 | 0.999668981 | NA |
| ASV_16s_21312 | 0.093831296 | 0.299807533  | 3.551938819 | 0.428301189 | 0.999668981 | NA |
| ASV_16s_21313 | 0.093831296 | 0.299807533  | 3.551938819 | 0.428301189 | 0.999668981 | NA |
| ASV_16s_21314 | 0.093831296 | 0.299807533  | 3.551938819 | 0.428301189 | 0.999668981 | NA |
| ASV_16s_21315 | 0.093859817 | 0.103359468  | 3.551804454 | 0.539389461 | 0.99928909  | NA |
| ASV_16s_21316 | 0.093865521 | 0.071207726  | 3.551780815 | 0.553797131 | 0.999224686 | NA |
| ASV_16s_21317 | 0.095384809 | 0.060984337  | 3.551767068 | 0.561151531 | 0.99919034  | NA |
| ASV_16s_21318 | 0.093865521 | 0.071207726  | 3.551780815 | 0.553797131 | 0.999224686 | NA |
| ASV_16s_21319 | 0.093871225 | 0.040395581  | 3.551758439 | 0.566084033 | 0.999166737 | NA |
| ASV_16s_21320 | 0.095643728 | 0.028573981  | 3.551737027 | 0.574470805 | 0.999125546 | NA |
| ASV_16s_21321 | 0.106235707 | -0.063942473 | 3.551576334 | 0.636460537 | 0.998777746 | NA |
| ASV_16s_21322 | 0.095902647 | -0.00312869  | 3.551703055 | 0.585399877 | 0.999069835 | NA |
| ASV_16s_21323 | 0.095902647 | -0.00312869  | 3.551703055 | 0.585399877 | 0.999069835 | NA |
| ASV_16s_21324 | 0.096161566 | -0.033393734 | 3.551672918 | 0.593977638 | 0.999024471 | NA |
| ASV_16s_21325 | 0.096161566 | -0.033393734 | 3.551672918 | 0.593977638 | 0.999024471 | NA |
| ASV_16s_21326 | 0.096161566 | -0.033393734 | 3.551672918 | 0.593977638 | 0.999024471 | NA |
| ASV_16s_21327 | 0.093882633 | -0.019547395 | 3.551700067 | 0.58371092  | 0.999078597 | NA |
| ASV_16s_21328 | 0.096420485 | -0.062549846 | 3.551645136 | 0.600119088 | 0.998991093 | NA |
| ASV_16s_21329 | 0.093888337 | -0.047975267 | 3.551674214 | 0.589049246 | 0.999050713 | NA |
| ASV_16s_21330 | 0.096420485 | -0.062549846 | 3.551645136 | 0.600119088 | 0.998991093 | NA |
| ASV_16s_21331 | 0.096679403 | -0.091101356 | 3.551617308 | 0.603776062 | 0.998970857 | NA |
| ASV_16s_21332 | 0.110887361 | -0.161692707 | 3.55146311  | 0.668099891 | 0.998569016 | NA |
| ASV_16s_21333 | 0.110887361 | -0.161692707 | 3.55146311  | 0.668099891 | 0.998569016 | NA |
| ASV_16s_21334 | 0.093894041 | -0.075543958 | 3.551650772 | 0.592066597 | 0.999034704 | NA |
| ASV_16s_21335 | 0.096679403 | -0.091101356 | 3.551617308 | 0.603776062 | 0.998970857 | NA |
| ASV_16s_21336 | 0.096938322 | -0.118746744 | 3.551592504 | 0.605015842 | 0.998963935 | NA |
| ASV_16s_21337 | 0.093899745 | -0.102680164 | 3.551626801 | 0.592704183 | 0.999031298 | NA |
| ASV_16s_21338 | 0.096938322 | -0.118746744 | 3.551592504 | 0.605015842 | 0.998963935 | NA |
| ASV_16s_21339 | 0.101623981 | -0.142126361 | 3.551543779 | 0.624619668 | 0.998850287 | NA |
| ASV_16s_21340 | 0.097197241 | -0.145678413 | 3.551570605 | 0.603710481 | 0.998971222 | NA |
| ASV_16s_21341 | 0.093905449 | -0.129161252 | 3.551605733 | 0.59089921  | 0.999040919 | NA |
| ASV_16s_21342 | 0.097197241 | -0.145678413 | 3.551570605 | 0.603710481 | 0.998971222 | NA |
| ASV_16s_21343 | 0.095683657 | -0.163684989 | 3.551569047 | 0.593418419 | 0.999027473 | NA |

|               |             |              |             |             |             |    |
|---------------|-------------|--------------|-------------|-------------|-------------|----|
| ASV_16s_21344 | 0.095683657 | -0.163684989 | 3.551569047 | 0.593418419 | 0.999027473 | NA |
| ASV_16s_21345 | 0.097715079 | -0.198018717 | 3.551534336 | 0.593876117 | 0.999025017 | NA |
| ASV_16s_21346 | 0.093922561 | -0.20603141  | 3.55155652  | 0.571476041 | 0.999140408 | NA |
| ASV_16s_21347 | 0.10624163  | -0.306261675 | 3.551408057 | 0.585161343 | 0.999071076 | NA |
| ASV_16s_21348 | 0.033543559 | -0.082760848 | 3.551892297 | 0.209987233 | 0.999970281 | NA |
| ASV_16s_21349 | 0.033543559 | -0.082760848 | 3.551892297 | 0.209987233 | 0.999970281 | NA |
| ASV_16s_21350 | 0.137355503 | -0.518349048 | 3.551145316 | 0.549409017 | 0.999244702 | NA |
| ASV_16s_21351 | 0.135536968 | -0.513808917 | 3.551156824 | 0.544689728 | 0.999265836 | NA |
| ASV_16s_21352 | 0.128015465 | -0.49445575  | 3.551206934 | 0.525737781 | NA          | NA |
| ASV_16s_21353 | 0.128015465 | -0.49445575  | 3.551206934 | 0.525737781 | NA          | NA |
| ASV_16s_21354 | 0.128015465 | -0.49445575  | 3.551206934 | 0.525737781 | NA          | NA |
| ASV_16s_21355 | 0.128015465 | -0.49445575  | 3.551206934 | 0.525737781 | NA          | NA |
| ASV_16s_21356 | 0.128015465 | -0.49445575  | 3.551206934 | 0.525737781 | NA          | NA |
| ASV_16s_21357 | 0.123842655 | -0.483088551 | 3.551236541 | 0.515485993 | 0.999387779 | NA |
| ASV_16s_21358 | 0.130105006 | -0.499955512 | 3.551192541 | 0.530944262 | 0.999325102 | NA |
| ASV_16s_21359 | 0.122451718 | -0.47922366  | 3.551246749 | 0.512132061 | 0.999400835 | NA |
| ASV_16s_21360 | 0.132020419 | -0.504920092 | 3.551179636 | 0.535772227 | NA          | NA |
| ASV_16s_21361 | 0.132020419 | -0.504920092 | 3.551179636 | 0.535772227 | NA          | NA |
| ASV_16s_21362 | 0.124367131 | -0.484532088 | 3.551232747 | 0.516753891 | 0.999382794 | NA |
| ASV_16s_21363 | 0.117351617 | -0.464699411 | 3.551285751 | 0.500119053 | NA          | NA |
| ASV_16s_21364 | 0.117351617 | -0.464699411 | 3.551285751 | 0.500119053 | NA          | NA |
| ASV_16s_21365 | 0.129493976 | -0.498359416 | 3.551196716 | 0.529416632 | NA          | NA |
| ASV_16s_21366 | 0.129493976 | -0.498359416 | 3.551196716 | 0.529416632 | NA          | NA |
| ASV_16s_21367 | 0.115590351 | -0.459498524 | 3.551299967 | 0.49368274  | 0.999469285 | NA |
| ASV_16s_21368 | 0.09978643  | -0.409889216 | 3.551441576 | 0.461334701 | NA          | NA |
| ASV_16s_21369 | 0.09978643  | -0.409889216 | 3.551441576 | 0.461334701 | NA          | NA |
| ASV_16s_21370 | 0.09978643  | -0.409889216 | 3.551441576 | 0.461334701 | NA          | NA |
| ASV_16s_21371 | 0.09978643  | -0.409889216 | 3.551441576 | 0.461334701 | NA          | NA |
| ASV_16s_21372 | 0.09978643  | -0.409889216 | 3.551441576 | 0.461334701 | NA          | NA |
| ASV_16s_21373 | 0.09978643  | -0.409889216 | 3.551441576 | 0.461334701 | NA          | NA |
| ASV_16s_21374 | 0.09978643  | -0.409889216 | 3.551441576 | 0.461334701 | NA          | NA |
| ASV_16s_21375 | 0.09978643  | -0.409889216 | 3.551441576 | 0.461334701 | NA          | NA |
| ASV_16s_21376 | 0.09978643  | -0.409889216 | 3.551441576 | 0.461334701 | NA          | NA |
| ASV_16s_21377 | 0.09978643  | -0.409889216 | 3.551441576 | 0.461334701 | NA          | NA |
| ASV_16s_21378 | 0.096494637 | -0.398917194 | 3.551471571 | 0.450935411 | 0.999607045 | NA |
| ASV_16s_21379 | 0.096494637 | -0.398917194 | 3.551471571 | 0.450935411 | 0.999607045 | NA |
| ASV_16s_21380 | 0.095988208 | -0.397167982 | 3.55147615  | 0.449441215 | 0.99961136  | NA |
| ASV_16s_21381 | 0.094975349 | -0.393560196 | 3.551484964 | 0.446576624 | 0.999619541 | NA |
| ASV_16s_21382 | 0.09396249  | -0.389917616 | 3.551493919 | 0.44385584  | 0.999627202 | NA |
| ASV_16s_21383 | 0.09396249  | -0.389917616 | 3.551493919 | 0.44385584  | 0.999627202 | NA |
| ASV_16s_21384 | 0.09396249  | -0.389917616 | 3.551493919 | 0.44385584  | 0.999627202 | NA |
| ASV_16s_21385 | 0.09396249  | -0.389917616 | 3.551493919 | 0.44385584  | 0.999627202 | NA |
| ASV_16s_21386 | 0.09396249  | -0.389917616 | 3.551493919 | 0.44385584  | 0.999627202 | NA |
| ASV_16s_21387 | 0.09396249  | -0.389917616 | 3.551493919 | 0.44385584  | 0.999627202 | NA |
| ASV_16s_21388 | 0.09396249  | -0.389917616 | 3.551493919 | 0.44385584  | 0.999627202 | NA |
| ASV_16s_21389 | 0.09396249  | -0.389917616 | 3.551493919 | 0.44385584  | 0.999627202 | NA |
| ASV_16s_21390 | 0.09396249  | -0.389917616 | 3.551493919 | 0.44385584  | 0.999627202 | NA |
| ASV_16s_21391 | 0.09396249  | -0.389917616 | 3.551493919 | 0.44385584  | 0.999627202 | NA |
| ASV_16s_21392 | 0.09396249  | -0.389917616 | 3.551493919 | 0.44385584  | 0.999627202 | NA |
| ASV_16s_21393 | 0.09396249  | -0.389917616 | 3.551493919 | 0.44385584  | 0.999627202 | NA |
| ASV_16s_21394 | 0.09396249  | -0.389917616 | 3.551493919 | 0.44385584  | 0.999627202 | NA |
| ASV_16s_21395 | 0.09396249  | -0.389917616 | 3.551493919 | 0.44385584  | 0.999627202 | NA |
| ASV_16s_21396 | 0.09396249  | -0.389917616 | 3.551493919 | 0.44385584  | 0.999627202 | NA |
| ASV_16s_21397 | 0.09396249  | -0.389917616 | 3.551493919 | 0.44385584  | 0.999627202 | NA |
| ASV_16s_21398 | 0.09396249  | -0.389917616 | 3.551493919 | 0.44385584  | 0.999627202 | NA |
| ASV_16s_21399 | 0.09396249  | -0.389917616 | 3.551493919 | 0.44385584  | 0.999627202 | NA |
| ASV_16s_21400 | 0.09396249  | -0.389917616 | 3.551493919 | 0.44385584  | 0.999627202 | NA |
| ASV_16s_21401 | 0.09396249  | -0.389917616 | 3.551493919 | 0.44385584  | 0.999627202 | NA |
| ASV_16s_21402 | 0.143117648 | -0.532538362 | 3.551109109 | 0.564687342 | NA          | NA |
| ASV_16s_21403 | 0.02993705  | -0.141084264 | 3.55124881  | 0.11168695  | NA          | NA |
| ASV_16s_21404 | 0.02993705  | -0.141084264 | 3.55124881  | 0.11168695  | NA          | NA |
| ASV_16s_21405 | 0.032113443 | 0.024922034  | 3.551202394 | 0.178985344 | 0.999982804 | NA |
| ASV_16s_21406 | 0.060821091 | 0.22029232   | 3.55105156  | 0.275247342 | NA          | NA |
| ASV_16s_21407 | 0.031566036 | 0.232521497  | 3.551352319 | 0.103068077 | NA          | NA |
| ASV_16s_21408 | 0.041733282 | 0.226300051  | 3.551211506 | 0.166378199 | NA          | NA |
| ASV_16s_21414 | 0.045920146 | 0.65986383   | 3.551816201 | 0.229110032 | 0.999959978 | NA |
| ASV_16s_21415 | 0.066486949 | 0.595405932  | 3.550962343 | 0.258360779 | NA          | NA |

|               |             |              |             |             |             |    |
|---------------|-------------|--------------|-------------|-------------|-------------|----|
| ASV_16s_21416 | 0.096495521 | 0.01380963   | 3.551677975 | 0.514445021 | 0.999391852 | NA |
| ASV_16s_21417 | 0.10126134  | -0.227763647 | 3.551557106 | 0.416259973 | 0.99969903  | NA |
| ASV_16s_21418 | 0.104130032 | -0.468544992 | 3.551492709 | 0.39156416  | 0.999754702 | NA |
| ASV_16s_21419 | 0.099533784 | -0.209596601 | 3.55158752  | 0.376116829 | 0.999785661 | NA |
| ASV_16s_21420 | 0.097993749 | -0.127978188 | 3.55177416  | 0.470865738 | 0.999546321 | NA |
| ASV_16s_21421 | 0.100168045 | 0.535010919  | 3.551972612 | 0.407376906 | 0.999719959 | NA |
| ASV_16s_21422 | 0.120719738 | -0.412235864 | 3.551473792 | 0.478029197 | 0.999523019 | NA |
| ASV_16s_21423 | 0.124720511 | -0.427104292 | 3.551438425 | 0.489716224 | 0.999483272 | NA |
| ASV_16s_21424 | 0.101435395 | 0.582012614  | 3.551978646 | 0.418408804 | 0.999693811 | NA |
| ASV_16s_21425 | 0.116789793 | -0.349938158 | 3.55149998  | 0.537507414 | 0.999297226 | NA |
| ASV_16s_21426 | 0.098959897 | 0.119123834  | 3.551691351 | 0.485145554 | 0.999499075 | NA |
| ASV_16s_21427 | 0.119816967 | -0.403351827 | 3.551446566 | 0.488464654 | 0.999487632 | NA |
| ASV_16s_21428 | 0.121456221 | -0.417669217 | 3.551417728 | 0.49238606  | 0.999473886 | NA |
| ASV_16s_21429 | 0.1008318   | 0.644451824  | 3.551907299 | 0.334012841 | 0.999856219 | NA |
| ASV_16s_21430 | 0.116326853 | 0.095065047  | 3.551796645 | 0.478563141 | 0.99952125  | NA |
| ASV_16s_21431 | 0.131132544 | -0.452245152 | 3.551278689 | 0.539263566 | 0.999289636 | NA |
| ASV_16s_21432 | 0.120809018 | -0.191337248 | 3.551359675 | 0.703141722 | 0.998311481 | NA |
| ASV_16s_21433 | 0.100343769 | 0.368110671  | 3.551799172 | 0.50899157  | 0.999412887 | NA |
| ASV_16s_21434 | 0.126984571 | -0.421749972 | 3.551274103 | 0.539390574 | 0.999289085 | NA |
| ASV_16s_21435 | 0.141797047 | -0.341858761 | 3.551561585 | 0.415363904 | 0.999701188 | NA |
| ASV_16s_21436 | 0.097962769 | 0.01973468   | 3.551536053 | 0.432967154 | 0.999656804 | NA |
| ASV_16s_21437 | 0.133708554 | -0.353254111 | 3.551650538 | 0.478101707 | 0.999522779 | NA |
| ASV_16s_21438 | 0.102683914 | 0.212875123  | 3.551598156 | 0.517158409 | 0.999381197 | NA |
| ASV_16s_21439 | 0.121569495 | -0.354346717 | 3.551261979 | 0.545855309 | 0.999260654 | NA |
| ASV_16s_21440 | 0.120510811 | -0.363775313 | 3.551375128 | 0.560364333 | 0.999194064 | NA |
| ASV_16s_21441 | 0.126226575 | -0.346483905 | 3.551200977 | 0.572489041 | 0.9991354   | NA |
| ASV_16s_21442 | 0.124939413 | -0.289711213 | 3.55149772  | 0.622833847 | 0.99886097  | NA |
| ASV_16s_21443 | 0.098775319 | 0.252506888  | 3.5517809   | 0.368366503 | 0.999800128 | NA |
| ASV_16s_21444 | 0.146168643 | 0.305649009  | 3.551890964 | 0.447296356 | 0.999617497 | NA |
| ASV_16s_21445 | 0.124661376 | -0.282735311 | 3.551234375 | 0.575670562 | 0.999119543 | NA |
| ASV_16s_21446 | 0.171001571 | 0.723402292  | 3.551387252 | 0.830103251 | 0.997124465 | NA |
| ASV_16s_21447 | 0.102310349 | 0.666215747  | 3.551695944 | 0.492170031 | 0.999474649 | NA |
| ASV_16s_21448 | 0.095839205 | -0.505982111 | 3.551364565 | 0.355567934 | 0.999822522 | NA |
| ASV_16s_21449 | 0.125226266 | 0.18414499   | 3.550269565 | 0.522083936 | 0.999361534 | NA |
| ASV_16s_21450 | 0.121737894 | -0.165623278 | 3.551241903 | 0.58111431  | 0.999091957 | NA |
| ASV_16s_21451 | 0.121867713 | -0.165623737 | 3.551240495 | 0.581698863 | 0.999088961 | NA |
| ASV_16s_21452 | 0.147990416 | 0.208189803  | 3.551087664 | 0.673371955 | 0.998532073 | NA |
| ASV_16s_21453 | 0.105292853 | 0.193066708  | 3.551346592 | 0.513758265 | 0.999394528 | NA |
| ASV_16s_21454 | 0.123031345 | 0.333736091  | 3.551866771 | 0.445948077 | 0.99962132  | NA |
| ASV_16s_21455 | 0.113202535 | 0.051592211  | 3.551179678 | 0.679902835 | 0.998485433 | NA |
| ASV_16s_21456 | 0.136952812 | 0.26501673   | 3.551075666 | 0.643959854 | 0.998730253 | NA |
| ASV_16s_21457 | 0.104267053 | 0.680679244  | 3.551521583 | 0.515280975 | 0.999388583 | NA |
| ASV_16s_21458 | 0.121319242 | -0.002375687 | 3.551194777 | 0.597017429 | 0.999008045 | NA |
| ASV_16s_21459 | 0.113491924 | 0.095706714  | 3.551818767 | 0.440701588 | 0.99963595  | NA |
| ASV_16s_21460 | 0.113615572 | 0.344104413  | 3.551745644 | 0.514544541 | 0.999391463 | NA |
| ASV_16s_21461 | 0.125091645 | 0.102092728  | 3.551161833 | 0.617148978 | 0.998894534 | NA |
| ASV_16s_21462 | 0.117797368 | 0.213433889  | 3.550953091 | 0.546458625 | 0.999257962 | NA |
| ASV_16s_21463 | 0.111261629 | 0.347288183  | 3.551697506 | 0.544117289 | 0.999268372 | NA |
| ASV_16s_21464 | 0.130444428 | 0.688176391  | 3.551176336 | 0.632392402 | 0.998803005 | NA |
| ASV_16s_21465 | 0.123263343 | 0.985588584  | 3.551541018 | 0.464018503 | NA          | NA |
| ASV_16s_21466 | 0.123263343 | 0.985588584  | 3.551541018 | 0.464018503 | NA          | NA |
| ASV_16s_21467 | 0.125595935 | 1.117081434  | 3.551565305 | 0.331467165 | 0.99985988  | NA |
| ASV_16s_21468 | 0.129964998 | 1.006301439  | 3.551690594 | 0.361160486 | 0.999812962 | NA |
| ASV_16s_21469 | 0.145047581 | 0.585123159  | 3.551457899 | 0.413073297 | 0.999706657 | NA |
| ASV_16s_21470 | 0.129780872 | 0.064477152  | 3.551186259 | 0.388975112 | 0.999760093 | NA |
| ASV_16s_21471 | 0.142268636 | 0.321495943  | 3.55200807  | 0.371279449 | 0.999794773 | NA |
| ASV_16s_21472 | 0.149411299 | 0.612096543  | 3.551445018 | 0.781414696 | 0.997629028 | NA |
| ASV_16s_21473 | 0.107395374 | 1.002280201  | 3.551518346 | 0.432891932 | 0.999657003 | NA |
| ASV_16s_21474 | 0.107395374 | 1.002280201  | 3.551518346 | 0.432891932 | 0.999657003 | NA |
| ASV_16s_21475 | 0.107395374 | 1.002280201  | 3.551518346 | 0.432891932 | 0.999657003 | NA |
| ASV_16s_21476 | 0.107395374 | 1.002280201  | 3.551518346 | 0.432891932 | 0.999657003 | NA |
| ASV_16s_21477 | 0.107395374 | 1.002280201  | 3.551518346 | 0.432891932 | 0.999657003 | NA |
| ASV_16s_21478 | 0.106399963 | 1.204072998  | 3.551542877 | 0.256680778 | 0.999941063 | NA |
| ASV_16s_21479 | 0.112319328 | 1.248914553  | 3.551475062 | 0.245903665 | 0.999949067 | NA |
| ASV_16s_21480 | 0.114256382 | 0.712262595  | 3.551345117 | 0.549879126 | 0.999242575 | NA |
| ASV_16s_21481 | 0.1631644   | 0.898956354  | 3.551159071 | 0.725885183 | 0.998128845 | NA |
| ASV_16s_21482 | 0.161760377 | 1.22464308   | 3.55130585  | 0.47409788  | 0.999535906 | NA |

|               |             |              |             |             |             |    |
|---------------|-------------|--------------|-------------|-------------|-------------|----|
| ASV_16s_21483 | 0.101818195 | 0.333761856  | 3.551964545 | 0.451135323 | NA          | NA |
| ASV_16s_21484 | 0.101818195 | 0.333761856  | 3.551964545 | 0.451135323 | NA          | NA |
| ASV_16s_21485 | 0.101818195 | 0.333761856  | 3.551964545 | 0.451135323 | NA          | NA |
| ASV_16s_21486 | 0.101818195 | 0.333761856  | 3.551964545 | 0.451135323 | NA          | NA |
| ASV_16s_21487 | 0.101818195 | 0.333761856  | 3.551964545 | 0.451135323 | NA          | NA |
| ASV_16s_21488 | 0.123263343 | 0.341073812  | 3.551905069 | 0.498552857 | NA          | NA |
| ASV_16s_21489 | 0.123263343 | 0.341073812  | 3.551905069 | 0.498552857 | NA          | NA |
| ASV_16s_21490 | 0.134325181 | 0.346433668  | 3.551986823 | 0.285608182 | 0.999915306 | NA |
| ASV_16s_21491 | 0.127909897 | 0.348744956  | 3.551925944 | 0.274350347 | 0.999926105 | NA |
| ASV_16s_21492 | 0.118398556 | -0.071129105 | 3.551299243 | 0.575476657 | 0.999120515 | NA |
| ASV_16s_21493 | 0.133229166 | 0.348059757  | 3.551804825 | 0.306967479 | 0.999891884 | NA |
| ASV_16s_21494 | 0.13612816  | 0.347230009  | 3.551955684 | 0.284957439 | 0.999915959 | NA |
| ASV_16s_21495 | 0.161413815 | 0.349093714  | 3.551799608 | 0.340282779 | 0.99984692  | NA |
| ASV_16s_21496 | 0.078903019 | 0.326345875  | 3.552020984 | 0.381702372 | 0.999774798 | NA |
| ASV_16s_21497 | 0.078903019 | 0.326345875  | 3.552020984 | 0.381702372 | 0.999774798 | NA |
| ASV_16s_21498 | 0.106836448 | 0.33547338   | 3.551952689 | 0.461449933 | NA          | NA |
| ASV_16s_21499 | 0.106836448 | 0.33547338   | 3.551952689 | 0.461449933 | NA          | NA |
| ASV_16s_21500 | 0.106836448 | 0.33547338   | 3.551952689 | 0.461449933 | NA          | NA |
| ASV_16s_21501 | 0.143410176 | 0.347865682  | 3.55183769  | 0.549705001 | NA          | NA |
| ASV_16s_21502 | 0.112360469 | -0.148014179 | 3.551310738 | 0.347155587 | 0.999836258 | NA |
| ASV_16s_21503 | 0.137342113 | -0.477844252 | 3.551232975 | 0.537949828 | NA          | NA |
| ASV_16s_21504 | 0.148045254 | -0.67869258  | 3.551316435 | 0.322002276 | 0.999872927 | NA |
| ASV_16s_21505 | 0.132020419 | -0.467097618 | 3.5512747   | 0.5247867   | NA          | NA |
| ASV_16s_21506 | 0.132020419 | -0.467097618 | 3.5512747   | 0.5247867   | NA          | NA |
| ASV_16s_21507 | 0.132020419 | -0.467097618 | 3.5512747   | 0.5247867   | NA          | NA |
| ASV_16s_21508 | 0.132020419 | -0.467097618 | 3.5512747   | 0.5247867   | NA          | NA |
| ASV_16s_21509 | 0.132020419 | -0.467097618 | 3.5512747   | 0.5247867   | NA          | NA |
| ASV_16s_21510 | 0.109170334 | -0.626343418 | 3.551431085 | 0.292505202 | 0.999908174 | NA |
| ASV_16s_21511 | 0.116897992 | -0.489924314 | 3.551265049 | 0.405259911 | 0.999724795 | NA |
| ASV_16s_21512 | 0.134019113 | -0.710759448 | 3.551174579 | 0.291087297 | 0.999909673 | NA |
| ASV_16s_21513 | 0.15767717  | -0.509318576 | 3.551043501 | 0.590947042 | NA          | NA |
| ASV_16s_21514 | 0.128909118 | 0.492066043  | 3.551190116 | 0.433839689 | 0.999654494 | NA |
| ASV_16s_21515 | 0.113436745 | -0.422858897 | 3.551429532 | 0.481937764 | NA          | NA |
| ASV_16s_21516 | 0.113436745 | -0.422858897 | 3.551429532 | 0.481937764 | NA          | NA |
| ASV_16s_21517 | 0.07880133  | -0.314721819 | 3.551726259 | 0.388587504 | 0.999760893 | NA |
| ASV_16s_21518 | 0.070185657 | -0.463735283 | 3.551650758 | 0.190128258 | 0.999978847 | NA |
| ASV_16s_21519 | 0.115924029 | -0.429236443 | 3.551407072 | 0.487323271 | NA          | NA |
| ASV_16s_21520 | 0.115375057 | 1.19048432   | 3.55141378  | 0.270894958 | 0.999929217 | NA |
| ASV_16s_21521 | 0.216983199 | 1.236357032  | 3.550935291 | 0.701228581 | NA          | NA |
| ASV_16s_21522 | 0.116832953 | 1.073177941  | 3.551205797 | 0.397204422 | NA          | NA |
| ASV_16s_21523 | 0.164020687 | 1.18196373   | 3.55095218  | 0.501478008 | NA          | NA |
| ASV_16s_21524 | 0.104533567 | 1.036756323  | 3.551294234 | 0.367991553 | 0.999800811 | NA |
| ASV_16s_21525 | 0.104533567 | 1.036756323  | 3.551294234 | 0.367991553 | 0.999800811 | NA |
| ASV_16s_21526 | 0.132133151 | 0.36165678   | 3.551552846 | 0.457366169 | NA          | NA |
| ASV_16s_21527 | 0.119865209 | 0.356021636  | 3.551605909 | 0.428266631 | NA          | NA |
| ASV_16s_21528 | 0.108832697 | 0.350334673  | 3.551657577 | 0.404449458 | NA          | NA |
| ASV_16s_21529 | 0.108832697 | 0.350334673  | 3.551657577 | 0.404449458 | NA          | NA |
| ASV_16s_21530 | 0.108832697 | 0.350334673  | 3.551657577 | 0.404449458 | NA          | NA |
| ASV_16s_21531 | 0.089840107 | 0.345204782  | 3.55172579  | 0.356866458 | NA          | NA |
| ASV_16s_21532 | 0.089840107 | 0.345204782  | 3.55172579  | 0.356866458 | NA          | NA |
| ASV_16s_21533 | 0.097203811 | 0.346461715  | 3.551702905 | 0.378388817 | NA          | NA |
| ASV_16s_21534 | 0.097203811 | 0.346461715  | 3.551702905 | 0.378388817 | NA          | NA |
| ASV_16s_21535 | 0.132815163 | -0.0706739   | 3.551188138 | 0.548361078 | 0.99924943  | NA |
| ASV_16s_21536 | 0.134614911 | 0.923037725  | 3.551118115 | 0.60754478  | 0.999849718 | NA |
| ASV_16s_21537 | 0.136363614 | 0.363682531  | 3.551530622 | 0.467836448 | NA          | NA |
| ASV_16s_21538 | 0.136363614 | 0.363682531  | 3.551530622 | 0.467836448 | NA          | NA |
| ASV_16s_21539 | 0.129315334 | -0.474885822 | 3.550982143 | 0.451879263 | 0.999604303 | NA |
| ASV_16s_21540 | 0.054613154 | -0.235902923 | 3.551587642 | 0.24101681  | 0.999952432 | NA |
| ASV_16s_21541 | 0.133970713 | -0.48329616  | 3.550933459 | 0.462986639 | NA          | NA |
| ASV_16s_21542 | 0.133970713 | -0.48329616  | 3.550933459 | 0.462986639 | NA          | NA |
| ASV_16s_21543 | 0.133970713 | -0.48329616  | 3.550933459 | 0.462986639 | NA          | NA |
| ASV_16s_21544 | 0.152060941 | 0.178304927  | 3.550545417 | 0.756605774 | 0.997862001 | NA |
| ASV_16s_21545 | 0.145315244 | 0.255021334  | 3.550633421 | 0.721993643 | 0.998160982 | NA |
| ASV_16s_21546 | 0.165008376 | -0.523931517 | 3.550639026 | 0.543335741 | NA          | NA |
| ASV_16s_21547 | 0.06078674  | -0.265780772 | 3.551540269 | 0.263878566 | 0.999935253 | NA |
| ASV_16s_21548 | 0.119887879 | 1.081660494  | 3.551186044 | 0.403066513 | NA          | NA |
| ASV_16s_21549 | 0.119887879 | 1.081660494  | 3.551186044 | 0.403066513 | NA          | NA |

|               |             |              |             |             |             |    |
|---------------|-------------|--------------|-------------|-------------|-------------|----|
| ASV_16s_21550 | 0.119887879 | 1.081660494  | 3.551186044 | 0.403066513 | NA          | NA |
| ASV_16s_21551 | 0.119225523 | 1.079838455  | 3.551190258 | 0.401781895 | NA          | NA |
| ASV_16s_21552 | 0.119225523 | 1.079838455  | 3.551190258 | 0.401781895 | NA          | NA |
| ASV_16s_21553 | 0.108832697 | -0.077947704 | 3.551015968 | 0.646158513 | NA          | NA |
| ASV_16s_21554 | 0.108832697 | -0.077947704 | 3.551015968 | 0.646158513 | NA          | NA |
| ASV_16s_21555 | 0.108832697 | -0.077947704 | 3.551015968 | 0.646158513 | NA          | NA |
| ASV_16s_21556 | 0.108832697 | -0.077947704 | 3.551015968 | 0.646158513 | NA          | NA |
| ASV_16s_21557 | 0.108832697 | -0.077947704 | 3.551015968 | 0.646158513 | NA          | NA |
| ASV_16s_21558 | 0.108832697 | -0.077947704 | 3.551015968 | 0.646158513 | NA          | NA |
| ASV_16s_21559 | 0.108832697 | -0.077947704 | 3.551015968 | 0.646158513 | NA          | NA |
| ASV_16s_21560 | 0.108832697 | -0.077947704 | 3.551015968 | 0.646158513 | NA          | NA |
| ASV_16s_21561 | 0.108832697 | -0.077947704 | 3.551015968 | 0.646158513 | NA          | NA |
| ASV_16s_21562 | 0.108832697 | -0.077947704 | 3.551015968 | 0.646158513 | NA          | NA |
| ASV_16s_21563 | 0.108832697 | -0.077947704 | 3.551015968 | 0.646158513 | NA          | NA |
| ASV_16s_21564 | 0.108832697 | -0.077947704 | 3.551015968 | 0.646158513 | NA          | NA |
| ASV_16s_21565 | 0.106679816 | -0.077909379 | 3.55102601  | 0.639170319 | 0.998760725 | NA |
| ASV_16s_21566 | 0.092802879 | -0.07766094  | 3.551101816 | 0.58647693  | NA          | NA |
| ASV_16s_21567 | 0.092802879 | -0.07766094  | 3.551101816 | 0.58647693  | NA          | NA |
| ASV_16s_21568 | 0.092802879 | -0.07766094  | 3.551101816 | 0.58647693  | NA          | NA |
| ASV_16s_21569 | 0.092802879 | -0.07766094  | 3.551101816 | 0.58647693  | NA          | NA |
| ASV_16s_21570 | 0.092802879 | -0.07766094  | 3.551101816 | 0.58647693  | NA          | NA |
| ASV_16s_21571 | 0.092802879 | -0.07766094  | 3.551101816 | 0.58647693  | NA          | NA |
| ASV_16s_21572 | 0.092802879 | -0.07766094  | 3.551101816 | 0.58647693  | NA          | NA |
| ASV_16s_21573 | 0.092802879 | -0.07766094  | 3.551101816 | 0.58647693  | NA          | NA |
| ASV_16s_21574 | 0.092802879 | -0.07766094  | 3.551101816 | 0.58647693  | NA          | NA |
| ASV_16s_21575 | 0.092802879 | -0.07766094  | 3.551101816 | 0.58647693  | NA          | NA |
| ASV_16s_21576 | 0.092802879 | -0.07766094  | 3.551101816 | 0.58647693  | NA          | NA |
| ASV_16s_21577 | 0.092802879 | -0.07766094  | 3.551101816 | 0.58647693  | NA          | NA |
| ASV_16s_21578 | 0.092802879 | -0.07766094  | 3.551101816 | 0.58647693  | NA          | NA |
| ASV_16s_21579 | 0.104706342 | -0.077882873 | 3.551035576 | 0.632820002 | NA          | NA |
| ASV_16s_21580 | 0.104706342 | -0.077882873 | 3.551035576 | 0.632820002 | NA          | NA |
| ASV_16s_21581 | 0.064709103 | 0.220270885  | 3.551023237 | 0.295633208 | 0.999904807 | NA |
| ASV_16s_21582 | 0.065416014 | 0.220267262  | 3.551018445 | 0.299286077 | 0.999900766 | NA |
| ASV_16s_21583 | 0.069088535 | 0.22024826   | 3.550995086 | 0.317950553 | NA          | NA |
| ASV_16s_21584 | 0.069088535 | 0.22024826   | 3.550995086 | 0.317950553 | NA          | NA |
| ASV_16s_21585 | 0.069088535 | 0.22024826   | 3.550995086 | 0.317950553 | NA          | NA |
| ASV_16s_21586 | 0.069088535 | 0.22024826   | 3.550995086 | 0.317950553 | NA          | NA |
| ASV_16s_21587 | 0.06895057  | 0.220248867  | 3.550995917 | 0.317259032 | NA          | NA |
| ASV_16s_21588 | 0.06895057  | 0.220248867  | 3.550995917 | 0.317259032 | NA          | NA |
| ASV_16s_21589 | 0.06895057  | 0.220248867  | 3.550995917 | 0.317259032 | NA          | NA |
| ASV_16s_21590 | 0.11776954  | 0.310956829  | 3.551142535 | 0.657149571 | 0.998643753 | NA |
| ASV_16s_21591 | 0.118694451 | 0.310956554  | 3.55113825  | 0.660274978 | 0.998622695 | NA |
| ASV_16s_21592 | 0.117688403 | 0.310956854  | 3.551142914 | 0.656875814 | 0.998645588 | NA |
| ASV_16s_21593 | 0.119906018 | 0.31095631   | 3.551132737 | 0.664383307 | NA          | NA |
| ASV_16s_21594 | 0.119906018 | 0.31095631   | 3.551132737 | 0.664383307 | NA          | NA |
| ASV_16s_21595 | 0.10281704  | 0.310962171  | 3.55122242  | 0.608004916 | NA          | NA |
| ASV_16s_21596 | 0.110499814 | 0.31095927   | 3.551178708 | 0.632901845 | 0.998799861 | NA |
| ASV_16s_21597 | 0.117542357 | 0.31095701   | 3.551143601 | 0.656383466 | NA          | NA |
| ASV_16s_21598 | 0.117542357 | 0.31095701   | 3.551143601 | 0.656383466 | NA          | NA |
| ASV_16s_21599 | 0.117542357 | 0.31095701   | 3.551143601 | 0.656383466 | NA          | NA |
| ASV_16s_21600 | 0.072779319 | 0.595486532  | 3.550926909 | 0.287168088 | NA          | NA |
| ASV_16s_21601 | 0.122980342 | 0.68719949   | 3.55109319  | 0.620461845 | NA          | NA |
| ASV_16s_21602 | 0.095783928 | -0.091652976 | 3.551357845 | 0.405077621 | 0.999725208 | NA |
| ASV_16s_21603 | 0.097758062 | -0.056687632 | 3.551354891 | 0.623535955 | 0.998856778 | NA |
| ASV_16s_21604 | 0.097758062 | -0.056687632 | 3.551354891 | 0.623535955 | 0.998856778 | NA |
| ASV_16s_21605 | 0.117970058 | 1.171163371  | 3.551532942 | 0.280408042 | 0.999920422 | NA |
| ASV_16s_21606 | 0.150791703 | 0.903597222  | 3.551513356 | 0.465758508 | 0.999562452 | NA |
| ASV_16s_21607 | 0.09825358  | -0.05252177  | 3.551400172 | 0.626982877 | 0.998836046 | NA |
| ASV_16s_21608 | 0.105697906 | -0.05590906  | 3.551327755 | 0.659433227 | 0.998628388 | NA |
| ASV_16s_21609 | 0.098749099 | -0.048619023 | 3.551449999 | 0.628953789 | 0.99882408  | NA |
| ASV_16s_21610 | 0.13017063  | 0.530452889  | 3.551671171 | 0.323353153 | 0.999871119 | NA |
| ASV_16s_21611 | 0.105005521 | 0.155162642  | 3.551610852 | 0.625808793 | 0.998843136 | NA |
| ASV_16s_21612 | 0.091898953 | 0.286293333  | 3.551860898 | 0.316023805 | 0.99988072  | NA |
| ASV_16s_21613 | 0.127492495 | 0.995921947  | 3.551510877 | 0.472543127 | NA          | NA |
| ASV_16s_21614 | 0.142120969 | 0.294278877  | 3.551801626 | 0.545140707 | NA          | NA |
| ASV_16s_21615 | 0.173409404 | -0.592033966 | 3.550918985 | 0.649958331 | NA          | NA |
| ASV_16s_21616 | 0.155856495 | 0.972025833  | 3.551364474 | 0.517264297 | 0.999380779 | NA |



|               |             |              |             |             |             |    |
|---------------|-------------|--------------|-------------|-------------|-------------|----|
| ASV_16s_21617 | 0.081835251 | 0.286418338  | 3.551804238 | 0.394104182 | 0.999749334 | NA |
| ASV_16s_21618 | 0.166076757 | 0.27953204   | 3.551617142 | 0.625016869 | NA          | NA |
| ASV_16s_21619 | 0.131043687 | 0.281901826  | 3.551674457 | 0.526025618 | 0.999345496 | NA |
| ASV_16s_21620 | 0.207763142 | -0.538967226 | 3.551096862 | 0.741177078 | NA          | NA |
| ASV_16s_21621 | 0.207763142 | -0.538967226 | 3.551096862 | 0.741177078 | NA          | NA |
| ASV_16s_21622 | 0.211973413 | -0.552012992 | 3.55056106  | 0.749258424 | NA          | NA |
| ASV_16s_21623 | 0.211973413 | -0.552012992 | 3.55056106  | 0.749258424 | NA          | NA |
| ASV_16s_21624 | 0.129366116 | 0.321591409  | 3.551443904 | 0.464527083 | 0.999566282 | NA |
| ASV_16s_21625 | 0.123263343 | -0.462758841 | 3.55104304  | 0.437924717 | NA          | NA |
| ASV_16s_21626 | 0.136675749 | 1.124940975  | 3.551090245 | 0.437875665 | NA          | NA |
| ASV_16s_21627 | 0.136675749 | 1.124940975  | 3.551090245 | 0.437875665 | NA          | NA |
| ASV_16s_21628 | 0.136675749 | 1.124940975  | 3.551090245 | 0.437875665 | NA          | NA |
| ASV_16s_21629 | 0.136675749 | 1.124940975  | 3.551090245 | 0.437875665 | NA          | NA |
| ASV_16s_21630 | 0.128201777 | 1.053011804  | 3.551287027 | 0.449904379 | 0.999610026 | NA |
| ASV_16s_21631 | 0.150220939 | 1.067021792  | 3.551158011 | 0.557855686 | 0.999205856 | NA |
| ASV_16s_21632 | 0.117306669 | 0.686997727  | 3.551350319 | 0.532466197 | 0.999318706 | NA |
| ASV_16s_21633 | 0.077882296 | -0.077288597 | 3.551213122 | 0.518605897 | NA          | NA |
| ASV_16s_21634 | 0.077882296 | -0.077288597 | 3.551213122 | 0.518605897 | NA          | NA |
| ASV_16s_21635 | 0.077882296 | -0.077288597 | 3.551213122 | 0.518605897 | NA          | NA |
| ASV_16s_21636 | 0.085956314 | -0.080765062 | 3.551379439 | 0.533312357 | 0.999315132 | NA |
| ASV_16s_21637 | 0.242265708 | -0.028976466 | 3.550855186 | 1.202065342 | NA          | NA |
| ASV_16s_21638 | 0.188058427 | 0.341092626  | 3.550477593 | 1.03097933  | 0.994313197 | NA |
| ASV_16s_21639 | 0.095629312 | -0.167939812 | 3.55128308  | 0.510392576 | 0.999407531 | NA |
| ASV_16s_21640 | 0.215521574 | -0.028851835 | 3.550896647 | 1.096408263 | NA          | NA |
| ASV_16s_21641 | 0.168774691 | 0.261077406  | 3.55101118  | 0.931348655 | 0.995861285 | NA |
| ASV_16s_21642 | 0.105397349 | -0.024581193 | 3.551502278 | 0.681662292 | 0.998472702 | NA |
| ASV_16s_21643 | 0.102754773 | -0.023927804 | 3.551297977 | 0.685164326 | NA          | NA |
| ASV_16s_21644 | 0.102754773 | -0.023927804 | 3.551297977 | 0.685164326 | NA          | NA |
| ASV_16s_21645 | 0.102754773 | -0.023927804 | 3.551297977 | 0.685164326 | NA          | NA |
| ASV_16s_21646 | 0.102754773 | -0.023927804 | 3.551297977 | 0.685164326 | NA          | NA |
| ASV_16s_21647 | 0.102754773 | -0.023927804 | 3.551297977 | 0.685164326 | NA          | NA |
| ASV_16s_21648 | 0.102754773 | -0.023927804 | 3.551297977 | 0.685164326 | NA          | NA |
| ASV_16s_21649 | 0.117410406 | -0.072889592 | 3.551025889 | 0.698697982 | NA          | NA |
| ASV_16s_21650 | 0.117410406 | -0.072889592 | 3.551025889 | 0.698697982 | NA          | NA |
| ASV_16s_21651 | 0.085751818 | -0.072232587 | 3.551212914 | 0.579306097 | NA          | NA |
| ASV_16s_21652 | 0.085751818 | -0.072232587 | 3.551212914 | 0.579306097 | NA          | NA |
| ASV_16s_21653 | 0.085751818 | -0.072232587 | 3.551212914 | 0.579306097 | NA          | NA |
| ASV_16s_21654 | 0.085751818 | -0.072232587 | 3.551212914 | 0.579306097 | NA          | NA |
| ASV_16s_21655 | 0.10347109  | 0.245380611  | 3.551226517 | 0.644311327 | 0.998727997 | NA |
| ASV_16s_21656 | 0.084211001 | -0.072188224 | 3.551225563 | 0.572284676 | NA          | NA |
| ASV_16s_21657 | 0.084211001 | -0.072188224 | 3.551225563 | 0.572284676 | NA          | NA |
| ASV_16s_21658 | 0.084211001 | -0.072188224 | 3.551225563 | 0.572284676 | NA          | NA |
| ASV_16s_21659 | 0.084211001 | -0.072188224 | 3.551225563 | 0.572284676 | NA          | NA |
| ASV_16s_21660 | 0.084211001 | -0.072188224 | 3.551225563 | 0.572284676 | NA          | NA |
| ASV_16s_21661 | 0.084211001 | -0.072188224 | 3.551225563 | 0.572284676 | NA          | NA |
| ASV_16s_21662 | 0.084211001 | -0.072188224 | 3.551225563 | 0.572284676 | NA          | NA |
| ASV_16s_21663 | 0.084211001 | -0.072188224 | 3.551225563 | 0.572284676 | NA          | NA |
| ASV_16s_21664 | 0.142120969 | -0.073200334 | 3.550937404 | 0.784596284 | NA          | NA |
| ASV_16s_21665 | 0.142120969 | -0.073200334 | 3.550937404 | 0.784596284 | NA          | NA |
| ASV_16s_21666 | 0.104485706 | -0.072668754 | 3.551088682 | 0.656241599 | NA          | NA |
| ASV_16s_21667 | 0.104485706 | -0.072668754 | 3.551088682 | 0.656241599 | NA          | NA |
| ASV_16s_21668 | 0.104485706 | -0.072668754 | 3.551088682 | 0.656241599 | NA          | NA |
| ASV_16s_21669 | 0.104485706 | -0.072668754 | 3.551088682 | 0.656241599 | NA          | NA |
| ASV_16s_21670 | 0.104485706 | -0.072668754 | 3.551088682 | 0.656241599 | NA          | NA |
| ASV_16s_21671 | 0.104485706 | -0.072668754 | 3.551088682 | 0.656241599 | NA          | NA |
| ASV_16s_21672 | 0.104485706 | -0.072668754 | 3.551088682 | 0.656241599 | NA          | NA |
| ASV_16s_21673 | 0.117214679 | 0.360211533  | 3.551456122 | 0.716850609 | NA          | NA |
| ASV_16s_21674 | 0.117214679 | 0.360211533  | 3.551456122 | 0.716850609 | NA          | NA |
| ASV_16s_21675 | 0.117214679 | 0.360211533  | 3.551456122 | 0.716850609 | NA          | NA |
| ASV_16s_21676 | 0.1041998   | 0.358601892  | 3.55154715  | 0.673800625 | NA          | NA |
| ASV_16s_21677 | 0.1041998   | 0.358601892  | 3.55154715  | 0.673800625 | NA          | NA |
| ASV_16s_21678 | 0.1041998   | 0.358601892  | 3.55154715  | 0.673800625 | NA          | NA |
| ASV_16s_21679 | 0.1041998   | 0.358601892  | 3.55154715  | 0.673800625 | NA          | NA |
| ASV_16s_21680 | 0.1041998   | 0.358601892  | 3.55154715  | 0.673800625 | NA          | NA |
| ASV_16s_21681 | 0.1041998   | 0.358601892  | 3.55154715  | 0.673800625 | NA          | NA |
| ASV_16s_21682 | 0.1041998   | 0.358601892  | 3.55154715  | 0.673800625 | NA          | NA |
| ASV_16s_21683 | 0.1041998   | 0.358601892  | 3.55154715  | 0.673800625 | NA          | NA |

|               |             |             |             |             |             |    |
|---------------|-------------|-------------|-------------|-------------|-------------|----|
| ASV_16s_21684 | 0.1041998   | 0.358601892 | 3.55154715  | 0.673800625 | NA          | NA |
| ASV_16s_21685 | 0.1041998   | 0.358601892 | 3.55154715  | 0.673800625 | NA          | NA |
| ASV_16s_21686 | 0.1041998   | 0.358601892 | 3.55154715  | 0.673800625 | NA          | NA |
| ASV_16s_21687 | 0.1041998   | 0.358601892 | 3.55154715  | 0.673800625 | NA          | NA |
| ASV_16s_21688 | 0.139544984 | 0.805359021 | 3.551495146 | 0.760043428 | 0.997830665 | NA |
| ASV_16s_21689 | 0.135011116 | 0.315940006 | 3.55111778  | 0.739563069 | NA          | NA |
| ASV_16s_21690 | 0.135011116 | 0.315940006 | 3.55111778  | 0.739563069 | NA          | NA |
| ASV_16s_21691 | 0.135011116 | 0.315940006 | 3.55111778  | 0.739563069 | NA          | NA |
| ASV_16s_21692 | 0.135011116 | 0.315940006 | 3.55111778  | 0.739563069 | NA          | NA |
| ASV_16s_21693 | 0.135011116 | 0.315940006 | 3.55111778  | 0.739563069 | NA          | NA |
| ASV_16s_21694 | 0.135011116 | 0.315940006 | 3.55111778  | 0.739563069 | NA          | NA |
| ASV_16s_21695 | 0.135011116 | 0.315940006 | 3.55111778  | 0.739563069 | NA          | NA |
| ASV_16s_21696 | 0.117938234 | 0.31594011  | 3.551193869 | 0.680461291 | 0.9984814   | NA |
| ASV_16s_21697 | 0.11566185  | 0.315940126 | 3.551205688 | 0.672806928 | 0.998536062 | NA |
| ASV_16s_21698 | 0.130251631 | 0.315939916 | 3.551137085 | 0.722646873 | 0.998155613 | NA |
| ASV_16s_21699 | 0.116703196 | 0.315940208 | 3.551200205 | 0.676332991 | NA          | NA |
| ASV_16s_21700 | 0.116703196 | 0.315940208 | 3.551200205 | 0.676332991 | NA          | NA |
| ASV_16s_21701 | 0.116703196 | 0.315940208 | 3.551200205 | 0.676332991 | NA          | NA |
| ASV_16s_21702 | 0.116703196 | 0.315940208 | 3.551200205 | 0.676332991 | NA          | NA |
| ASV_16s_21703 | 0.116703196 | 0.315940208 | 3.551200205 | 0.676332991 | NA          | NA |
| ASV_16s_21704 | 0.120949923 | 0.315939959 | 3.551178972 | 0.690562552 | 0.998407203 | NA |
| ASV_16s_21705 | 0.181181373 | 0.315939715 | 3.550983421 | 0.909678743 | NA          | NA |
| ASV_16s_21706 | 0.146579832 | 0.315939846 | 3.551076327 | 0.780668569 | 0.997636268 | NA |
| ASV_16s_21707 | 0.108832697 | 0.31594028  | 3.551244073 | 0.650211777 | NA          | NA |
| ASV_16s_21708 | 0.108832697 | 0.31594028  | 3.551244073 | 0.650211777 | NA          | NA |
| ASV_16s_21709 | 0.108832697 | 0.31594028  | 3.551244073 | 0.650211777 | NA          | NA |
| ASV_16s_21710 | 0.108832697 | 0.31594028  | 3.551244073 | 0.650211777 | NA          | NA |
| ASV_16s_21711 | 0.108832697 | 0.31594028  | 3.551244073 | 0.650211777 | NA          | NA |
| ASV_16s_21712 | 0.108832697 | 0.31594028  | 3.551244073 | 0.650211777 | NA          | NA |
| ASV_16s_21713 | 0.108832697 | 0.31594028  | 3.551244073 | 0.650211777 | NA          | NA |
| ASV_16s_21714 | 0.108832697 | 0.31594028  | 3.551244073 | 0.650211777 | NA          | NA |
| ASV_16s_21715 | 0.108832697 | 0.31594028  | 3.551244073 | 0.650211777 | NA          | NA |
| ASV_16s_21716 | 0.108832697 | 0.31594028  | 3.551244073 | 0.650211777 | NA          | NA |
| ASV_16s_21717 | 0.108832697 | 0.31594028  | 3.551244073 | 0.650211777 | NA          | NA |
| ASV_16s_21718 | 0.114270715 | 0.408031295 | 3.551158679 | 0.818247415 | 0.997253242 | NA |
| ASV_16s_21719 | 0.125638587 | 0.693845851 | 3.551430221 | 0.728279206 | 0.998108892 | NA |
| ASV_16s_21720 | 0.1226127   | 0.499977539 | 3.551107109 | 0.910787238 | 0.996142222 | NA |
| ASV_16s_21721 | 0.140028012 | 0.655885789 | 3.551064317 | 0.780128273 | 0.997641501 | NA |
| ASV_16s_21722 | 0.103645408 | 0.686889468 | 3.5511927   | 0.55727442  | NA          | NA |
| ASV_16s_21723 | 0.187242679 | 0.687772435 | 3.550909292 | 0.824865769 | NA          | NA |
| ASV_16s_21724 | 0.187242679 | 0.687772435 | 3.550909292 | 0.824865769 | NA          | NA |
| ASV_16s_21725 | 0.187242679 | 0.687772435 | 3.550909292 | 0.824865769 | NA          | NA |
| ASV_16s_21726 | 0.177574607 | 1.102834299 | 3.551097608 | 0.618886213 | 0.998884349 | NA |
| ASV_16s_21727 | 0.159022857 | 1.080582825 | 3.551265115 | 0.575768071 | 0.999119054 | NA |
| ASV_16s_21728 | 0.186801338 | 0.99996649  | 3.551288657 | 0.723360713 | 0.998149734 | NA |
| ASV_16s_21729 | 0.170137629 | 0.733434625 | 3.551206514 | 0.833306307 | NA          | NA |
| ASV_16s_21730 | 0.170137629 | 0.733434625 | 3.551206514 | 0.833306307 | NA          | NA |
| ASV_16s_21731 | 0.151772474 | 1.041235548 | 3.551255089 | 0.571295874 | 0.999141297 | NA |
| ASV_16s_21732 | 0.152368177 | 1.000090965 | 3.551194837 | 0.580095213 | 0.999097165 | NA |
| ASV_16s_21733 | 0.170137629 | 0.733434625 | 3.551206514 | 0.833306307 | NA          | NA |
| ASV_16s_21734 | 0.170137629 | 0.733434625 | 3.551206514 | 0.833306307 | NA          | NA |
| ASV_16s_21735 | 0.150798027 | 0.73278204  | 3.551285724 | 0.770812794 | 0.997730534 | NA |
| ASV_16s_21736 | 0.143972285 | 0.7316484   | 3.551316704 | 0.749228794 | NA          | NA |
| ASV_16s_21737 | 0.143972285 | 0.7316484   | 3.551316704 | 0.749228794 | NA          | NA |
| ASV_16s_21738 | 0.143972285 | 0.7316484   | 3.551316704 | 0.749228794 | NA          | NA |
| ASV_16s_21739 | 0.143972285 | 0.7316484   | 3.551316704 | 0.749228794 | NA          | NA |
| ASV_16s_21740 | 0.143972285 | 0.7316484   | 3.551316704 | 0.749228794 | NA          | NA |
| ASV_16s_21741 | 0.143972285 | 0.7316484   | 3.551316704 | 0.749228794 | NA          | NA |
| ASV_16s_21742 | 0.143972285 | 0.7316484   | 3.551316704 | 0.749228794 | NA          | NA |
| ASV_16s_21743 | 0.143972285 | 0.7316484   | 3.551316704 | 0.749228794 | NA          | NA |
| ASV_16s_21744 | 0.143972285 | 0.7316484   | 3.551316704 | 0.749228794 | NA          | NA |
| ASV_16s_21745 | 0.143972285 | 0.7316484   | 3.551316704 | 0.749228794 | NA          | NA |
| ASV_16s_21746 | 0.143972285 | 0.7316484   | 3.551316704 | 0.749228794 | NA          | NA |
| ASV_16s_21747 | 0.143972285 | 0.7316484   | 3.551316704 | 0.749228794 | NA          | NA |
| ASV_16s_21748 | 0.143972285 | 0.7316484   | 3.551316704 | 0.749228794 | NA          | NA |
| ASV_16s_21749 | 0.143972285 | 0.7316484   | 3.551316704 | 0.749228794 | NA          | NA |
| ASV_16s_21750 | 0.143972285 | 0.7316484   | 3.551316704 | 0.749228794 | NA          | NA |

|               |             |             |             |             |             |    |
|---------------|-------------|-------------|-------------|-------------|-------------|----|
| ASV_16s_21751 | 0.143972285 | 0.7316484   | 3.551316704 | 0.749228794 | NA          | NA |
| ASV_16s_21752 | 0.143972285 | 0.7316484   | 3.551316704 | 0.749228794 | NA          | NA |
| ASV_16s_21753 | 0.143972285 | 0.7316484   | 3.551316704 | 0.749228794 | NA          | NA |
| ASV_16s_21754 | 0.143972285 | 0.7316484   | 3.551316704 | 0.749228794 | NA          | NA |
| ASV_16s_21755 | 0.215242196 | 0.73388501  | 3.551075343 | 0.985493754 | NA          | NA |
| ASV_16s_21756 | 0.168977196 | 1.040907553 | 3.551304141 | 0.641608644 | 0.998745274 | NA |
| ASV_16s_21757 | 0.071317487 | 0.667466641 | 3.551712286 | 0.482226896 | 0.999508992 | NA |
| ASV_16s_21758 | 0.071317487 | 0.667466641 | 3.551712286 | 0.482226896 | 0.999508992 | NA |
| ASV_16s_21759 | 0.071317487 | 0.667466641 | 3.551712286 | 0.482226896 | 0.999508992 | NA |
| ASV_16s_21760 | 0.071317487 | 0.667466641 | 3.551712286 | 0.482226896 | 0.999508992 | NA |
| ASV_16s_21761 | 0.071317487 | 0.667466641 | 3.551712286 | 0.482226896 | 0.999508992 | NA |
| ASV_16s_21762 | 0.071317487 | 0.667466641 | 3.551712286 | 0.482226896 | 0.999508992 | NA |
| ASV_16s_21763 | 0.071317487 | 0.667466641 | 3.551712286 | 0.482226896 | 0.999508992 | NA |
| ASV_16s_21764 | 0.071317487 | 0.667466641 | 3.551712286 | 0.482226896 | 0.999508992 | NA |
| ASV_16s_21765 | 0.13384758  | 0.692295569 | 3.551104767 | 0.677627327 | NA          | NA |
| ASV_16s_21766 | 0.13384758  | 0.692295569 | 3.551104767 | 0.677627327 | NA          | NA |
| ASV_16s_21767 | 0.13384758  | 0.692295569 | 3.551104767 | 0.677627327 | NA          | NA |
| ASV_16s_21768 | 0.13384758  | 0.692295569 | 3.551104767 | 0.677627327 | NA          | NA |
| ASV_16s_21769 | 0.13384758  | 0.692295569 | 3.551104767 | 0.677627327 | NA          | NA |
| ASV_16s_21770 | 0.135498819 | 0.692317271 | 3.551098093 | 0.682667303 | 0.998465397 | NA |
| ASV_16s_21771 | 0.135663943 | 0.692319507 | 3.551097434 | 0.683172576 | 0.998461716 | NA |
| ASV_16s_21772 | 0.135829067 | 0.692321737 | 3.551096778 | 0.683678077 | 0.998458028 | NA |
| ASV_16s_21773 | 0.135829067 | 0.692321737 | 3.551096778 | 0.683678077 | 0.998458028 | NA |
| ASV_16s_21774 | 0.137645431 | 0.692346828 | 3.551089656 | 0.689253578 | NA          | NA |
| ASV_16s_21775 | 0.137645431 | 0.692346828 | 3.551089656 | 0.689253578 | NA          | NA |
| ASV_16s_21776 | 0.137645431 | 0.692346828 | 3.551089656 | 0.689253578 | NA          | NA |
| ASV_16s_21777 | 0.137645431 | 0.692346828 | 3.551089656 | 0.689253578 | NA          | NA |
| ASV_16s_21778 | 0.137645431 | 0.692346828 | 3.551089656 | 0.689253578 | NA          | NA |
| ASV_16s_21779 | 0.137645431 | 0.692346828 | 3.551089656 | 0.689253578 | NA          | NA |
| ASV_16s_21780 | 0.137645431 | 0.692346828 | 3.551089656 | 0.689253578 | NA          | NA |
| ASV_16s_21781 | 0.137645431 | 0.692346828 | 3.551089656 | 0.689253578 | NA          | NA |
| ASV_16s_21782 | 0.137645431 | 0.692346828 | 3.551089656 | 0.689253578 | NA          | NA |
| ASV_16s_21783 | 0.137645431 | 0.692346828 | 3.551089656 | 0.689253578 | NA          | NA |
| ASV_16s_21784 | 0.131381793 | 0.692260674 | 3.551115056 | 0.669538531 | 0.998558997 | NA |
| ASV_16s_21785 | 0.126370883 | 0.692185713 | 3.551137167 | 0.653962166 | 0.998665007 | NA |
| ASV_16s_21786 | 0.118854517 | 0.692061649 | 3.551173783 | 0.63099586  | 0.998811594 | NA |
| ASV_16s_21787 | 0.108832697 | 0.691870137 | 3.55123035  | 0.601276573 | NA          | NA |
| ASV_16s_21788 | 0.108832697 | 0.691870137 | 3.55123035  | 0.601276573 | NA          | NA |
| ASV_16s_21789 | 0.108832697 | 0.691870137 | 3.55123035  | 0.601276573 | NA          | NA |
| ASV_16s_21790 | 0.108832697 | 0.691870137 | 3.55123035  | 0.601276573 | NA          | NA |
| ASV_16s_21791 | 0.108832697 | 0.691870137 | 3.55123035  | 0.601276573 | NA          | NA |
| ASV_16s_21792 | 0.108832697 | 0.691870137 | 3.55123035  | 0.601276573 | NA          | NA |
| ASV_16s_21793 | 0.108832697 | 0.691870137 | 3.55123035  | 0.601276573 | NA          | NA |
| ASV_16s_21794 | 0.108832697 | 0.691870137 | 3.55123035  | 0.601276573 | NA          | NA |
| ASV_16s_21795 | 0.108832697 | 0.691870137 | 3.55123035  | 0.601276573 | NA          | NA |
| ASV_16s_21796 | 0.108832697 | 0.691870137 | 3.55123035  | 0.601276573 | NA          | NA |
| ASV_16s_21797 | 0.108832697 | 0.691870137 | 3.55123035  | 0.601276573 | NA          | NA |
| ASV_16s_21798 | 0.108832697 | 0.691870137 | 3.55123035  | 0.601276573 | NA          | NA |
| ASV_16s_21799 | 0.108832697 | 0.691870137 | 3.55123035  | 0.601276573 | NA          | NA |
| ASV_16s_21800 | 0.126588623 | 0.692188928 | 3.551136219 | 0.654108392 | 0.998664037 | NA |
| ASV_16s_21801 | 0.159880984 | 0.692598723 | 3.551015483 | 0.759386801 | NA          | NA |
| ASV_16s_21802 | 0.159742621 | 0.692596531 | 3.55101588  | 0.758940683 | 0.99784075  | NA |
| ASV_16s_21803 | 0.159591679 | 0.69259589  | 3.551016316 | 0.758454283 | NA          | NA |
| ASV_16s_21804 | 0.129063774 | 0.030757859 | 3.551532812 | 0.709418301 | 0.99826232  | NA |
| ASV_16s_21805 | 0.144271939 | 0.585092474 | 3.550864222 | 0.46597413  | 0.999561779 | NA |
| ASV_16s_21806 | 0.089751675 | 0.300935949 | 3.551943873 | 0.415769573 | 0.999700213 | NA |
| ASV_16s_21807 | 0.089751675 | 0.300935949 | 3.551943873 | 0.415769573 | 0.999700213 | NA |
| ASV_16s_21808 | 0.089751675 | 0.300935949 | 3.551943873 | 0.415769573 | 0.999700213 | NA |
| ASV_16s_21809 | 0.089751675 | 0.300935949 | 3.551943873 | 0.415769573 | 0.999700213 | NA |
| ASV_16s_21810 | 0.089751675 | 0.300935949 | 3.551943873 | 0.415769573 | 0.999700213 | NA |
| ASV_16s_21811 | 0.089751675 | 0.300935949 | 3.551943873 | 0.415769573 | 0.999700213 | NA |
| ASV_16s_21812 | 0.089751675 | 0.300935949 | 3.551943873 | 0.415769573 | 0.999700213 | NA |
| ASV_16s_21813 | 0.089751675 | 0.300935949 | 3.551943873 | 0.415769573 | 0.999700213 | NA |
| ASV_16s_21814 | 0.089751675 | 0.300935949 | 3.551943873 | 0.415769573 | 0.999700213 | NA |
| ASV_16s_21815 | 0.089751675 | 0.300935949 | 3.551943873 | 0.415769573 | 0.999700213 | NA |
| ASV_16s_21816 | 0.089751675 | 0.300935949 | 3.551943873 | 0.415769573 | 0.999700213 | NA |
| ASV_16s_21817 | 0.089751675 | 0.300935949 | 3.551943873 | 0.415769573 | 0.999700213 | NA |

|               |             |              |             |             |             |    |
|---------------|-------------|--------------|-------------|-------------|-------------|----|
| ASV_16s_21818 | 0.089751675 | 0.300935949  | 3.551943873 | 0.415769573 | 0.999700213 | NA |
| ASV_16s_21819 | 0.089751675 | 0.300935949  | 3.551943873 | 0.415769573 | 0.999700213 | NA |
| ASV_16s_21820 | 0.089751675 | 0.300935949  | 3.551943873 | 0.415769573 | 0.999700213 | NA |
| ASV_16s_21821 | 0.089751675 | 0.300935949  | 3.551943873 | 0.415769573 | 0.999700213 | NA |
| ASV_16s_21822 | 0.089751675 | 0.300935949  | 3.551943873 | 0.415769573 | 0.999700213 | NA |
| ASV_16s_21823 | 0.089751675 | 0.300935949  | 3.551943873 | 0.415769573 | 0.999700213 | NA |
| ASV_16s_21824 | 0.089751675 | 0.300935949  | 3.551943873 | 0.415769573 | 0.999700213 | NA |
| ASV_16s_21825 | 0.089751675 | 0.300935949  | 3.551943873 | 0.415769573 | 0.999700213 | NA |
| ASV_16s_21826 | 0.089751675 | 0.300935949  | 3.551943873 | 0.415769573 | 0.999700213 | NA |
| ASV_16s_21827 | 0.089751675 | 0.300935949  | 3.551943873 | 0.415769573 | 0.999700213 | NA |
| ASV_16s_21828 | 0.089751675 | 0.300935949  | 3.551943873 | 0.415769573 | 0.999700213 | NA |
| ASV_16s_21829 | 0.089751675 | 0.300935949  | 3.551943873 | 0.415769573 | 0.999700213 | NA |
| ASV_16s_21830 | 0.089751675 | 0.300935949  | 3.551943873 | 0.415769573 | 0.999700213 | NA |
| ASV_16s_21831 | 0.089751675 | 0.300935949  | 3.551943873 | 0.415769573 | 0.999700213 | NA |
| ASV_16s_21832 | 0.089751675 | 0.300935949  | 3.551943873 | 0.415769573 | 0.999700213 | NA |
| ASV_16s_21833 | 0.089751675 | 0.300935949  | 3.551943873 | 0.415769573 | 0.999700213 | NA |
| ASV_16s_21834 | 0.089751675 | 0.300935949  | 3.551943873 | 0.415769573 | 0.999700213 | NA |
| ASV_16s_21835 | 0.089751675 | 0.300935949  | 3.551943873 | 0.415769573 | 0.999700213 | NA |
| ASV_16s_21836 | 0.089751675 | 0.300935949  | 3.551943873 | 0.415769573 | 0.999700213 | NA |
| ASV_16s_21837 | 0.096180329 | 0.148125164  | 3.551843916 | 0.519688487 | 0.999371149 | NA |
| ASV_16s_21838 | 0.089780195 | 0.100678547  | 3.551820921 | 0.518235507 | 0.999376933 | NA |
| ASV_16s_21839 | 0.097504431 | 0.046924854  | 3.551743618 | 0.557226686 | 0.999208794 | NA |
| ASV_16s_21840 | 0.089785899 | 0.068054594  | 3.551796583 | 0.531865157 | 0.999321237 | NA |
| ASV_16s_21841 | 0.091305188 | 0.057651291  | 3.5517827   | 0.539092689 | 0.999290377 | NA |
| ASV_16s_21842 | 0.091564107 | 0.02545352   | 3.551758117 | 0.551371152 | 0.999235796 | NA |
| ASV_16s_21843 | 0.091823025 | -0.006353388 | 3.551726424 | 0.561262849 | 0.999189812 | NA |
| ASV_16s_21844 | 0.091823025 | -0.006353388 | 3.551726424 | 0.561262849 | 0.999189812 | NA |
| ASV_16s_21845 | 0.091823025 | -0.006353388 | 3.551726424 | 0.561262849 | 0.999189812 | NA |
| ASV_16s_21846 | 0.091823025 | -0.006353388 | 3.551726424 | 0.561262849 | 0.999189812 | NA |
| ASV_16s_21847 | 0.102156085 | -0.067642374 | 3.551600584 | 0.611621759 | 0.998926524 | NA |
| ASV_16s_21848 | 0.092081944 | -0.037073794 | 3.551695582 | 0.568812308 | 0.999153484 | NA |
| ASV_16s_21849 | 0.09132223  | -0.032464738 | 3.55170469  | 0.565413027 | 0.999169975 | NA |
| ASV_16s_21850 | 0.092081944 | -0.037073794 | 3.551695582 | 0.568812308 | 0.999153484 | NA |
| ASV_16s_21851 | 0.092081944 | -0.037073794 | 3.551695582 | 0.568812308 | 0.999153484 | NA |
| ASV_16s_21852 | 0.089808715 | -0.051972458 | 3.551697213 | 0.56301156  | 0.999181493 | NA |
| ASV_16s_21853 | 0.092340863 | -0.066628591 | 3.551668395 | 0.573842203 | 0.999128679 | NA |
| ASV_16s_21854 | 0.092340863 | -0.066628591 | 3.551668395 | 0.573842203 | 0.999128679 | NA |
| ASV_16s_21855 | 0.092340863 | -0.066628591 | 3.551668395 | 0.573842203 | 0.999128679 | NA |
| ASV_16s_21856 | 0.089814419 | -0.080020963 | 3.551674203 | 0.564862269 | 0.999172626 | NA |
| ASV_16s_21857 | 0.092599782 | -0.095424482 | 3.551642551 | 0.576372163 | 0.99911602  | NA |
| ASV_16s_21858 | 0.089814419 | -0.080020963 | 3.551674203 | 0.564862269 | 0.999172626 | NA |
| ASV_16s_21859 | 0.092599782 | -0.095424482 | 3.551642551 | 0.576372163 | 0.99911602  | NA |
| ASV_16s_21860 | 0.092599782 | -0.095424482 | 3.551642551 | 0.576372163 | 0.99911602  | NA |
| ASV_16s_21861 | 0.089814419 | -0.080020963 | 3.551674203 | 0.564862269 | 0.999172626 | NA |
| ASV_16s_21862 | 0.089820123 | -0.107415216 | 3.551653279 | 0.564274305 | 0.99917545  | NA |
| ASV_16s_21863 | 0.092858701 | -0.123600648 | 3.551617749 | 0.576360349 | 0.999116079 | NA |
| ASV_16s_21864 | 0.089820123 | -0.107415216 | 3.551653279 | 0.564274305 | 0.99917545  | NA |
| ASV_16s_21865 | 0.098510599 | -0.15184716  | 3.5515577   | 0.599728548 | 0.998993238 | NA |
| ASV_16s_21866 | 0.096232873 | -0.166123066 | 3.551563877 | 0.586118661 | 0.99906609  | NA |
| ASV_16s_21867 | 0.089825827 | -0.134445462 | 3.551632349 | 0.561326423 | 0.99918951  | NA |
| ASV_16s_21868 | 0.09311762  | -0.151094847 | 3.551596039 | 0.573896843 | 0.999128407 | NA |
| ASV_16s_21869 | 0.09311762  | -0.151094847 | 3.551596039 | 0.573896843 | 0.999128407 | NA |
| ASV_16s_21870 | 0.089825827 | -0.134445462 | 3.551632349 | 0.561326423 | 0.99918951  | NA |
| ASV_16s_21871 | 0.093376538 | -0.178019667 | 3.551576989 | 0.568956368 | 0.99915278  | NA |
| ASV_16s_21872 | 0.093376538 | -0.178019667 | 3.551576989 | 0.568956368 | 0.99915278  | NA |
| ASV_16s_21873 | 0.089831532 | -0.160932274 | 3.551613953 | 0.556006308 | 0.999214474 | NA |
| ASV_16s_21874 | 0.093635457 | -0.20460834  | 3.551559644 | 0.561471279 | 0.999188823 | NA |
| ASV_16s_21875 | 0.08984294  | -0.213317985 | 3.551582723 | 0.538071502 | 0.999294794 | NA |
| ASV_16s_21876 | 0.093140436 | -0.253639866 | 3.551537051 | 0.535693546 | 0.999305006 | NA |
| ASV_16s_21877 | 0.032085143 | -0.072150761 | 3.551897667 | 0.202705581 | 0.99997366  | NA |
| ASV_16s_21878 | 0.032085143 | -0.072150761 | 3.551897667 | 0.202705581 | 0.99997366  | NA |
| ASV_16s_21879 | 0.152257144 | -0.551674034 | 3.551046083 | 0.592424587 | NA          | NA |
| ASV_16s_21880 | 0.152257144 | -0.551674034 | 3.551046083 | 0.592424587 | NA          | NA |
| ASV_16s_21881 | 0.122449576 | -0.479121111 | 3.55124702  | 0.508677845 | NA          | NA |
| ASV_16s_21882 | 0.122449576 | -0.479121111 | 3.55124702  | 0.508677845 | NA          | NA |
| ASV_16s_21883 | 0.122449576 | -0.479121111 | 3.55124702  | 0.508677845 | NA          | NA |
| ASV_16s_21884 | 0.122449576 | -0.479121111 | 3.55124702  | 0.508677845 | NA          | NA |

|               |             |              |             |             |             |    |
|---------------|-------------|--------------|-------------|-------------|-------------|----|
| ASV_16s_21885 | 0.122449576 | -0.479121111 | 3.55124702  | 0.508677845 | NA          | NA |
| ASV_16s_21886 | 0.122449576 | -0.479121111 | 3.55124702  | 0.508677845 | NA          | NA |
| ASV_16s_21887 | 0.12419086  | -0.483954348 | 3.551234266 | 0.513259925 | 0.999396466 | NA |
| ASV_16s_21888 | 0.124539117 | -0.484913443 | 3.551231748 | 0.514182357 | 0.999392876 | NA |
| ASV_16s_21889 | 0.116422183 | -0.461886703 | 3.551293422 | 0.493204089 | 0.999470987 | NA |
| ASV_16s_21890 | 0.124713245 | -0.485390923 | 3.551230495 | 0.5146442   | 0.999391074 | NA |
| ASV_16s_21891 | 0.126280401 | -0.489672292 | 3.551219319 | 0.518824065 | NA          | NA |
| ASV_16s_21892 | 0.126280401 | -0.489672292 | 3.551219319 | 0.518824065 | NA          | NA |
| ASV_16s_21893 | 0.126280401 | -0.489672292 | 3.551219319 | 0.518824065 | NA          | NA |
| ASV_16s_21894 | 0.106659712 | -0.43212607  | 3.551377049 | 0.469543654 | 0.999550535 | NA |
| ASV_16s_21895 | 0.112249373 | -0.449476699 | 3.551327745 | 0.48288327  | NA          | NA |
| ASV_16s_21896 | 0.112249373 | -0.449476699 | 3.551327745 | 0.48288327  | NA          | NA |
| ASV_16s_21897 | 0.112249373 | -0.449476699 | 3.551327745 | 0.48288327  | NA          | NA |
| ASV_16s_21898 | 0.112249373 | -0.449476699 | 3.551327745 | 0.48288327  | NA          | NA |
| ASV_16s_21899 | 0.112249373 | -0.449476699 | 3.551327745 | 0.48288327  | NA          | NA |
| ASV_16s_21900 | 0.112249373 | -0.449476699 | 3.551327745 | 0.48288327  | NA          | NA |
| ASV_16s_21901 | 0.112249373 | -0.449476699 | 3.551327745 | 0.48288327  | NA          | NA |
| ASV_16s_21902 | 0.112249373 | -0.449476699 | 3.551327745 | 0.48288327  | NA          | NA |
| ASV_16s_21903 | 0.123863803 | -0.483050858 | 3.551236641 | 0.512396114 | NA          | NA |
| ASV_16s_21904 | 0.123863803 | -0.483050858 | 3.551236641 | 0.512396114 | NA          | NA |
| ASV_16s_21905 | 0.099146248 | -0.407644862 | 3.551447663 | 0.450889631 | 0.999607178 | NA |
| ASV_16s_21906 | 0.095447889 | -0.39515614  | 3.551481058 | 0.444987658 | 0.999624028 | NA |
| ASV_16s_21907 | 0.095447889 | -0.39515614  | 3.551481058 | 0.444987658 | 0.999624028 | NA |
| ASV_16s_21908 | 0.095447889 | -0.39515614  | 3.551481058 | 0.444987658 | 0.999624028 | NA |
| ASV_16s_21909 | 0.095447889 | -0.39515614  | 3.551481058 | 0.444987658 | 0.999624028 | NA |
| ASV_16s_21910 | 0.095447889 | -0.39515614  | 3.551481058 | 0.444987658 | 0.999624028 | NA |
| ASV_16s_21911 | 0.095447889 | -0.39515614  | 3.551481058 | 0.444987658 | 0.999624028 | NA |
| ASV_16s_21912 | 0.095447889 | -0.39515614  | 3.551481058 | 0.444987658 | 0.999624028 | NA |
| ASV_16s_21913 | 0.095447889 | -0.39515614  | 3.551481058 | 0.444987658 | 0.999624028 | NA |
| ASV_16s_21914 | 0.095447889 | -0.39515614  | 3.551481058 | 0.444987658 | 0.999624028 | NA |
| ASV_16s_21915 | 0.095447889 | -0.39515614  | 3.551481058 | 0.444987658 | 0.999624028 | NA |
| ASV_16s_21916 | 0.094181815 | -0.390617399 | 3.551492194 | 0.441434327 | 0.99963393  | NA |
| ASV_16s_21917 | 0.106751685 | -0.432394688 | 3.551376274 | 0.469733347 | 0.999549932 | NA |
| ASV_16s_21918 | 0.0939286   | -0.389703033 | 3.551494449 | 0.440762763 | 0.999635781 | NA |
| ASV_16s_21919 | 0.093422171 | -0.387867771 | 3.551498984 | 0.43944943  | 0.999639383 | NA |
| ASV_16s_21920 | 0.092409312 | -0.384169782 | 3.551508165 | 0.43692242  | 0.999646245 | NA |
| ASV_16s_21921 | 0.089877164 | -0.374770229 | 3.551531772 | 0.431019294 | 0.999661924 | NA |
| ASV_16s_21922 | 0.089877164 | -0.374770229 | 3.551531772 | 0.431019294 | 0.999661924 | NA |
| ASV_16s_21923 | 0.089877164 | -0.374770229 | 3.551531772 | 0.431019294 | 0.999661924 | NA |
| ASV_16s_21924 | 0.089877164 | -0.374770229 | 3.551531772 | 0.431019294 | 0.999661924 | NA |
| ASV_16s_21925 | 0.089877164 | -0.374770229 | 3.551531772 | 0.431019294 | 0.999661924 | NA |
| ASV_16s_21926 | 0.089877164 | -0.374770229 | 3.551531772 | 0.431019294 | 0.999661924 | NA |
| ASV_16s_21927 | 0.089877164 | -0.374770229 | 3.551531772 | 0.431019294 | 0.999661924 | NA |
| ASV_16s_21928 | 0.089877164 | -0.374770229 | 3.551531772 | 0.431019294 | 0.999661924 | NA |
| ASV_16s_21929 | 0.089877164 | -0.374770229 | 3.551531772 | 0.431019294 | 0.999661924 | NA |
| ASV_16s_21930 | 0.089877164 | -0.374770229 | 3.551531772 | 0.431019294 | 0.999661924 | NA |
| ASV_16s_21931 | 0.089877164 | -0.374770229 | 3.551531772 | 0.431019294 | 0.999661924 | NA |
| ASV_16s_21932 | 0.089877164 | -0.374770229 | 3.551531772 | 0.431019294 | 0.999661924 | NA |
| ASV_16s_21933 | 0.089877164 | -0.374770229 | 3.551531772 | 0.431019294 | 0.999661924 | NA |
| ASV_16s_21934 | 0.089877164 | -0.374770229 | 3.551531772 | 0.431019294 | 0.999661924 | NA |
| ASV_16s_21935 | 0.089877164 | -0.374770229 | 3.551531772 | 0.431019294 | 0.999661924 | NA |
| ASV_16s_21936 | 0.089877164 | -0.374770229 | 3.551531772 | 0.431019294 | 0.999661924 | NA |
| ASV_16s_21937 | 0.136895142 | -0.517153635 | 3.551148336 | 0.54797949  | NA          | NA |
| ASV_16s_21938 | 0.136895142 | -0.517153635 | 3.551148336 | 0.54797949  | NA          | NA |
| ASV_16s_21939 | 0.136895142 | -0.517153635 | 3.551148336 | 0.54797949  | NA          | NA |
| ASV_16s_21940 | 0.081181381 | 0.724576518  | 3.55194609  | 0.282505739 | 0.999918385 | NA |
| ASV_16s_21941 | 0.028635439 | -0.138967854 | 3.551273547 | 0.102974793 | 0.999974442 | NA |
| ASV_16s_21942 | 0.058176696 | 0.220308354  | 3.551073044 | 0.260945167 | NA          | NA |
| ASV_16s_21943 | 0.051537458 | 0.221601797  | 3.551126179 | 0.224107988 | 0.999962882 | NA |
| ASV_16s_21944 | 0.039918792 | 0.227291475  | 3.551231709 | 0.155180307 | 0.999989468 | NA |
| ASV_16s_21950 | 0.140166692 | 0.595956478  | 3.550746271 | 0.526740434 | NA          | NA |
| ASV_16s_21951 | 0.127002367 | -0.45443705  | 3.551368816 | 0.480096332 | 0.999516146 | NA |
| ASV_16s_21952 | 0.085549892 | -0.450405728 | 3.55154422  | 0.333309045 | 0.999857238 | NA |
| ASV_16s_21953 | 0.094821074 | 0.488323929  | 3.551972821 | 0.381607913 | 0.999774985 | NA |
| ASV_16s_21954 | 0.102608055 | 0.041257553  | 3.551676001 | 0.504328729 | 0.999430476 | NA |
| ASV_16s_21955 | 0.123616316 | -0.428220003 | 3.551435538 | 0.483775038 | 0.999503749 | NA |
| ASV_16s_21956 | 0.11061401  | -0.370372962 | 3.551515272 | 0.454880795 | 0.999595495 | NA |

|               |             |              |             |             |             |    |
|---------------|-------------|--------------|-------------|-------------|-------------|----|
| ASV_16s_21957 | 0.092877373 | -0.021339588 | 3.551652691 | 0.39550769  | 0.999746333 | NA |
| ASV_16s_21958 | 0.117040761 | -0.105747981 | 3.551389403 | 0.491869136 | 0.999475712 | NA |
| ASV_16s_21959 | 0.09683774  | 0.061020216  | 3.551631428 | 0.318570822 | 0.999877442 | NA |
| ASV_16s_21960 | 0.093377408 | 0.010087928  | 3.551608909 | 0.404608331 | 0.999726272 | NA |
| ASV_16s_21961 | 0.153421584 | -0.427269367 | 3.551405768 | 0.465088735 | 0.999564538 | NA |
| ASV_16s_21962 | 0.107193868 | -0.345610438 | 3.551481384 | 0.464982818 | 0.999564867 | NA |
| ASV_16s_21963 | 0.141481165 | -0.41741011  | 3.55125519  | 0.601461603 | 0.998983695 | NA |
| ASV_16s_21964 | 0.119276313 | -0.363407237 | 3.551313465 | 0.522425869 | 0.999360153 | NA |
| ASV_16s_21965 | 0.118497449 | -0.362780658 | 3.551324537 | 0.518785964 | 0.999374746 | NA |
| ASV_16s_21966 | 0.120092687 | -0.371219866 | 3.55131075  | 0.52398009  | 0.999353852 | NA |
| ASV_16s_21967 | 0.156471344 | 0.063638776  | 3.551172864 | 0.734634064 | 0.998055242 | NA |
| ASV_16s_21968 | 0.129762845 | -0.340396796 | 3.551275915 | 0.570821288 | 0.999143635 | NA |
| ASV_16s_21969 | 0.122122992 | -0.337689396 | 3.551292099 | 0.542320331 | 0.999276294 | NA |
| ASV_16s_21970 | 0.110874054 | -0.314892192 | 3.551381421 | 0.499275445 | 0.99944913  | NA |
| ASV_16s_21971 | 0.119985591 | -0.343909526 | 3.551284361 | 0.534220959 | 0.99931128  | NA |
| ASV_16s_21972 | 0.105929992 | -0.304466138 | 3.551431393 | 0.48026433  | 0.999515585 | NA |
| ASV_16s_21973 | 0.105929992 | -0.304466138 | 3.551431393 | 0.48026433  | 0.999515585 | NA |
| ASV_16s_21974 | 0.161902596 | 0.183286602  | 3.551680167 | 0.521433985 | 0.999364152 | NA |
| ASV_16s_21975 | 0.097947701 | 0.996276478  | 3.5509799   | 0.238717261 | 0.999953961 | NA |
| ASV_16s_21976 | 0.118921358 | -0.222143571 | 3.551293554 | 0.550386982 | 0.999240272 | NA |
| ASV_16s_21977 | 0.118823993 | -0.222108501 | 3.551294608 | 0.549932845 | 0.999242332 | NA |
| ASV_16s_21978 | 0.107638111 | -0.220303701 | 3.551350941 | 0.50670556  | 0.999421556 | NA |
| ASV_16s_21979 | 0.113582104 | -0.222514237 | 3.551282501 | 0.533982568 | 0.999312292 | NA |
| ASV_16s_21980 | 0.099303685 | 0.888166361  | 3.551819788 | 0.272665731 | 0.999927634 | NA |
| ASV_16s_21981 | 0.149684472 | -0.460505475 | 3.551200661 | 0.563194063 | 0.999180621 | NA |
| ASV_16s_21982 | 0.108714201 | -0.080786163 | 3.551377627 | 0.528893889 | 0.999333655 | NA |
| ASV_16s_21983 | 0.129948887 | 0.316995606  | 3.551198124 | 0.599842062 | 0.998992615 | NA |
| ASV_16s_21984 | 0.117661683 | 0.315866414  | 3.55121601  | 0.563159682 | 0.999180785 | NA |
| ASV_16s_21985 | 0.115576339 | 0.168709261  | 3.550579442 | 0.450080952 | 0.999609516 | NA |
| ASV_16s_21986 | 0.100187432 | 0.310520686  | 3.551719611 | 0.429192546 | 0.999666678 | NA |
| ASV_16s_21987 | 0.116901046 | -0.002366364 | 3.551231012 | 0.572714785 | 0.999134281 | NA |
| ASV_16s_21988 | 0.098655176 | -0.176234867 | 3.551253096 | 0.543828235 | 0.99926965  | NA |
| ASV_16s_21989 | 0.100221656 | 0.002632987  | 3.551364155 | 0.542558241 | 0.999275249 | NA |
| ASV_16s_21990 | 0.120255514 | 0.576908145  | 3.551130318 | 0.393121767 | 0.99975142  | NA |
| ASV_16s_21991 | 0.119832385 | 1.09581515   | 3.551625956 | 0.217044508 | 0.999966727 | NA |
| ASV_16s_21992 | 0.132454018 | 0.114435518  | 3.551446869 | 0.534098609 | 0.9993118   | NA |
| ASV_16s_21993 | 0.125998894 | 0.159232614  | 3.551169194 | 0.659460051 | 0.998628207 | NA |
| ASV_16s_21994 | 0.09196998  | -0.235776526 | 3.551231347 | 0.453961432 | 0.999598207 | NA |
| ASV_16s_21995 | 0.117904067 | 0.972264222  | 3.551576622 | 0.447384577 | 0.999617245 | NA |
| ASV_16s_21996 | 0.141958165 | 0.83459297   | 3.551907492 | 0.469750781 | 0.999549877 | NA |
| ASV_16s_21997 | 0.118141413 | 1.179047571  | 3.551654021 | 0.213235971 | 0.99996868  | NA |
| ASV_16s_21998 | 0.152165296 | 0.292730201  | 3.551771533 | 0.57501961  | NA          | NA |
| ASV_16s_21999 | 0.12492578  | 1.055531313  | 3.551411215 | 0.46605992  | 0.999561511 | NA |
| ASV_16s_22000 | 0.12993306  | 1.069185542  | 3.551380167 | 0.477369582 | 0.999525198 | NA |
| ASV_16s_22001 | 0.136067339 | 0.888312899  | 3.551761264 | 0.390479059 | 0.999756972 | NA |
| ASV_16s_22002 | 0.099502823 | 0.975406776  | 3.551575572 | 0.41078333  | 0.999712056 | NA |
| ASV_16s_22003 | 0.099502823 | 0.975406776  | 3.551575572 | 0.41078333  | 0.999712056 | NA |
| ASV_16s_22004 | 0.099502823 | 0.975406776  | 3.551575572 | 0.41078333  | 0.999712056 | NA |
| ASV_16s_22005 | 0.099502823 | 0.975406776  | 3.551575572 | 0.41078333  | 0.999712056 | NA |
| ASV_16s_22006 | 0.114409676 | 1.024452734  | 3.551472899 | 0.441473884 | 0.999633821 | NA |
| ASV_16s_22007 | 0.111963109 | 1.016868268  | 3.551488268 | 0.438408881 | 0.99964222  | NA |
| ASV_16s_22008 | 0.111963109 | 1.016868268  | 3.551488268 | 0.438408881 | 0.99964222  | NA |
| ASV_16s_22009 | 0.111963109 | 1.016868268  | 3.551488268 | 0.438408881 | 0.99964222  | NA |
| ASV_16s_22010 | 0.121525667 | 0.131915786  | 3.551406823 | 0.357352754 | 0.999819509 | NA |
| ASV_16s_22011 | 0.11182003  | 1.226855819  | 3.551428411 | 0.251276776 | 0.999945178 | NA |
| ASV_16s_22012 | 0.10272601  | 0.986597069  | 3.551551568 | 0.419878032 | 0.999690207 | NA |
| ASV_16s_22013 | 0.10272601  | 0.986597069  | 3.551551568 | 0.419878032 | 0.999690207 | NA |
| ASV_16s_22014 | 0.10272601  | 0.986597069  | 3.551551568 | 0.419878032 | 0.999690207 | NA |
| ASV_16s_22015 | 0.10272601  | 0.986597069  | 3.551551568 | 0.419878032 | 0.999690207 | NA |
| ASV_16s_22016 | 0.10272601  | 0.986597069  | 3.551551568 | 0.419878032 | 0.999690207 | NA |
| ASV_16s_22017 | 0.10272601  | 0.986597069  | 3.551551568 | 0.419878032 | 0.999690207 | NA |
| ASV_16s_22018 | 0.097391316 | 0.332182143  | 3.551975738 | 0.434405876 | 0.999652989 | NA |
| ASV_16s_22019 | 0.097391316 | 0.332182143  | 3.551975738 | 0.434405876 | 0.999652989 | NA |
| ASV_16s_22020 | 0.097391316 | 0.332182143  | 3.551975738 | 0.434405876 | 0.999652989 | NA |
| ASV_16s_22021 | 0.116480044 | 0.338710573  | 3.551928453 | 0.478282783 | 0.99952218  | NA |
| ASV_16s_22022 | 0.106435193 | 0.344024489  | 3.551989326 | 0.244338037 | 0.999950163 | NA |
| ASV_16s_22023 | 0.133107506 | -0.304192264 | 3.551566348 | 0.403308617 | 0.999729201 | NA |

|               |             |              |             |             |             |    |
|---------------|-------------|--------------|-------------|-------------|-------------|----|
| ASV_16s_22024 | 0.117904067 | 0.339222855  | 3.551923324 | 0.481930646 | NA          | NA |
| ASV_16s_22025 | 0.117904067 | 0.339222855  | 3.551923324 | 0.481930646 | NA          | NA |
| ASV_16s_22026 | 0.117904067 | 0.339222855  | 3.551923324 | 0.481930646 | NA          | NA |
| ASV_16s_22027 | 0.117904067 | 0.339222855  | 3.551923324 | 0.481930646 | NA          | NA |
| ASV_16s_22028 | 0.117904067 | 0.339222855  | 3.551923324 | 0.481930646 | NA          | NA |
| ASV_16s_22029 | 0.130406954 | 0.343401127  | 3.55188274  | 0.514504183 | NA          | NA |
| ASV_16s_22030 | 0.128214923 | 0.347768294  | 3.551952266 | 0.271859745 | 0.999928358 | NA |
| ASV_16s_22031 | 0.146665785 | 0.299661444  | 3.55193834  | 0.328215608 | 0.999864462 | NA |
| ASV_16s_22032 | 0.148625901 | 0.823771734  | 3.551275392 | 0.768314732 | 0.997754026 | NA |
| ASV_16s_22033 | 0.162004175 | 0.755680726  | 3.55173154  | 0.502336292 | 0.999437882 | NA |
| ASV_16s_22034 | 0.075472453 | 0.325745901  | 3.552026889 | 0.370133189 | 0.999796892 | NA |
| ASV_16s_22035 | 0.075472453 | 0.325745901  | 3.552026889 | 0.370133189 | 0.999796892 | NA |
| ASV_16s_22036 | 0.075472453 | 0.325745901  | 3.552026889 | 0.370133189 | 0.999796892 | NA |
| ASV_16s_22037 | 0.102191385 | 0.333881595  | 3.551963706 | 0.444732243 | 0.999624746 | NA |
| ASV_16s_22038 | 0.102191385 | 0.333881595  | 3.551963706 | 0.444732243 | 0.999624746 | NA |
| ASV_16s_22039 | 0.102191385 | 0.333881595  | 3.551963706 | 0.444732243 | 0.999624746 | NA |
| ASV_16s_22040 | 0.102191385 | 0.333881595  | 3.551963706 | 0.444732243 | 0.999624746 | NA |
| ASV_16s_22041 | 0.082496822 | 0.244126202  | 3.551507178 | 0.158833847 | 0.99998859  | NA |
| ASV_16s_22042 | 0.068132715 | -0.143486856 | 3.55176869  | 0.238601804 | 0.999954037 | NA |
| ASV_16s_22043 | 0.177193872 | 0.362383316  | 3.551657681 | 0.651814973 | NA          | NA |
| ASV_16s_22044 | 0.135085715 | 0.342292504  | 3.552024447 | 0.303694407 | 0.999895733 | NA |
| ASV_16s_22045 | 0.131370717 | -0.46564076  | 3.551280236 | 0.52169031  | NA          | NA |
| ASV_16s_22046 | 0.126280401 | -0.454419604 | 3.551321194 | 0.508352142 | NA          | NA |
| ASV_16s_22047 | 0.120477882 | 0.338877653  | 3.551479284 | 0.352075536 | 0.999828317 | NA |
| ASV_16s_22048 | 0.15082164  | -0.500378367 | 3.551116606 | 0.575342905 | NA          | NA |
| ASV_16s_22049 | 0.115091136 | 0.83460495   | 3.551418219 | 0.32719535  | 0.999865878 | NA |
| ASV_16s_22050 | 0.075375185 | -0.301537599 | 3.551754711 | 0.376958745 | 0.999784047 | NA |
| ASV_16s_22051 | 0.075375185 | -0.301537599 | 3.551754711 | 0.376958745 | 0.999784047 | NA |
| ASV_16s_22052 | 0.083842875 | -0.333045897 | 3.551687769 | 0.398925515 | 0.999738921 | NA |
| ASV_16s_22053 | 0.110883854 | -0.416173264 | 3.551452208 | 0.470566118 | NA          | NA |
| ASV_16s_22054 | 0.110883854 | -0.416173264 | 3.551452208 | 0.470566118 | NA          | NA |
| ASV_16s_22055 | 0.117160961 | -0.647073794 | 3.551433115 | 0.25781834  | 0.99994017  | NA |
| ASV_16s_22056 | 0.098661333 | -0.381356382 | 3.551555828 | 0.443875885 | NA          | NA |
| ASV_16s_22057 | 0.135941797 | 1.085077707  | 3.551341805 | 0.491409702 | NA          | NA |
| ASV_16s_22058 | 0.135941797 | 1.085077707  | 3.551341805 | 0.491409702 | NA          | NA |
| ASV_16s_22059 | 0.148715499 | 1.116825609  | 3.551268519 | 0.52273327  | NA          | NA |
| ASV_16s_22060 | 0.111753259 | 1.058524522  | 3.551240748 | 0.380527694 | 0.999777113 | NA |
| ASV_16s_22061 | 0.111753259 | 1.058524522  | 3.551240748 | 0.380527694 | 0.999777113 | NA |
| ASV_16s_22062 | 0.058324436 | 0.859802549  | 3.551691645 | 0.227826057 | 0.999960738 | NA |
| ASV_16s_22063 | 0.058324436 | 0.859802549  | 3.551691645 | 0.227826057 | 0.999960738 | NA |
| ASV_16s_22064 | 0.072282389 | 0.920785488  | 3.551568893 | 0.273699893 | 0.999926698 | NA |
| ASV_16s_22065 | 0.072282389 | 0.920785488  | 3.551568893 | 0.273699893 | 0.999926698 | NA |
| ASV_16s_22066 | 0.09998863  | 1.022084975  | 3.551331052 | 0.3554209   | 0.999822768 | NA |
| ASV_16s_22067 | 0.09998863  | 1.022084975  | 3.551331052 | 0.3554209   | 0.999822768 | NA |
| ASV_16s_22068 | 0.09998863  | 1.022084975  | 3.551331052 | 0.3554209   | 0.999822768 | NA |
| ASV_16s_22069 | 0.09998863  | 1.022084975  | 3.551331052 | 0.3554209   | 0.999822768 | NA |
| ASV_16s_22070 | 0.09998863  | 1.022084975  | 3.551331052 | 0.3554209   | 0.999822768 | NA |
| ASV_16s_22071 | 0.13781125  | 1.127560971  | 3.551084591 | 0.437517194 | NA          | NA |
| ASV_16s_22072 | 0.126388231 | 0.359216455  | 3.551578144 | 0.441094761 | NA          | NA |
| ASV_16s_22073 | 0.126388231 | 0.359216455  | 3.551578144 | 0.441094761 | NA          | NA |
| ASV_16s_22074 | 0.126388231 | 0.359216455  | 3.551578144 | 0.441094761 | NA          | NA |
| ASV_16s_22075 | 0.092282464 | 0.273991564  | 3.551543573 | 0.128016915 | 0.999994573 | NA |
| ASV_16s_22076 | 0.114653678 | 0.353380935  | 3.551629535 | 0.412034569 | NA          | NA |
| ASV_16s_22077 | 0.114653678 | 0.353380935  | 3.551629535 | 0.412034569 | NA          | NA |
| ASV_16s_22078 | 0.114653678 | 0.353380935  | 3.551629535 | 0.412034569 | NA          | NA |
| ASV_16s_22079 | 0.104100841 | 0.348019374  | 3.551680378 | 0.388221953 | NA          | NA |
| ASV_16s_22080 | 0.104100841 | 0.348019374  | 3.551680378 | 0.388221953 | NA          | NA |
| ASV_16s_22081 | 0.104100841 | 0.348019374  | 3.551680378 | 0.388221953 | NA          | NA |
| ASV_16s_22082 | 0.104100841 | 0.348019374  | 3.551680378 | 0.388221953 | NA          | NA |
| ASV_16s_22083 | 0.131344712 | -0.046447697 | 3.551079999 | 0.679499541 | 0.998488342 | NA |
| ASV_16s_22084 | 0.085934015 | 0.344509412  | 3.551738851 | 0.344991211 | 0.999839669 | NA |
| ASV_16s_22085 | 0.085934015 | 0.344509412  | 3.551738851 | 0.344991211 | 0.999839669 | NA |
| ASV_16s_22086 | 0.085934015 | 0.344509412  | 3.551738851 | 0.344991211 | 0.999839669 | NA |
| ASV_16s_22087 | 0.147208897 | 0.368286781  | 3.551467205 | 0.497327316 | NA          | NA |
| ASV_16s_22088 | 0.092977558 | 0.345742921  | 3.551715881 | 0.365468839 | 0.99980536  | NA |
| ASV_16s_22089 | 0.032373993 | 0.336892321  | 3.551946342 | 0.149565547 | 0.999990722 | NA |
| ASV_16s_22090 | 0.130434761 | 0.36101367   | 3.551560912 | 0.451652826 | NA          | NA |

|               |             |              |             |             |             |    |
|---------------|-------------|--------------|-------------|-------------|-------------|----|
| ASV_16s_22091 | 0.052238669 | -0.223869519 | 3.551604295 | 0.231923221 | 0.999958277 | NA |
| ASV_16s_22092 | 0.052238669 | -0.223869519 | 3.551604295 | 0.231923221 | 0.999958277 | NA |
| ASV_16s_22093 | 0.052238669 | -0.223869519 | 3.551604295 | 0.231923221 | 0.999958277 | NA |
| ASV_16s_22094 | 0.128145899 | -0.472655522 | 3.550995257 | 0.446943308 | NA          | NA |
| ASV_16s_22095 | 0.128145899 | -0.472655522 | 3.550995257 | 0.446943308 | NA          | NA |
| ASV_16s_22096 | 0.179021487 | -0.532175208 | 3.550509536 | 0.59101302  | NA          | NA |
| ASV_16s_22097 | 0.170615565 | -0.528354982 | 3.550589539 | 0.565739221 | NA          | NA |
| ASV_16s_22098 | 0.170615565 | -0.528354982 | 3.550589539 | 0.565739221 | NA          | NA |
| ASV_16s_22099 | 0.170615565 | -0.528354982 | 3.550589539 | 0.565739221 | NA          | NA |
| ASV_16s_22100 | 0.157834099 | -0.5159782   | 3.550700818 | 0.528057923 | NA          | NA |
| ASV_16s_22101 | 0.063442666 | -0.2778015   | 3.551521871 | 0.273466092 | 0.99992691  | NA |
| ASV_16s_22102 | 0.063442666 | -0.2778015   | 3.551521871 | 0.273466092 | 0.99992691  | NA |
| ASV_16s_22103 | 0.058143838 | -0.253239959 | 3.551559863 | 0.254080008 | 0.999943069 | NA |
| ASV_16s_22104 | 0.058143838 | -0.253239959 | 3.551559863 | 0.254080008 | 0.999943069 | NA |
| ASV_16s_22105 | 0.058143838 | -0.253239959 | 3.551559863 | 0.254080008 | 0.999943069 | NA |
| ASV_16s_22106 | 0.130733325 | 1.110152962  | 3.551122183 | 0.421049286 | NA          | NA |
| ASV_16s_22107 | 0.114675363 | 1.06697328   | 3.551220467 | 0.386365131 | 0.999765444 | NA |
| ASV_16s_22108 | 0.046092769 | 0.797737893  | 3.551789865 | 0.184231816 | 0.999981012 | NA |
| ASV_16s_22109 | 0.046092769 | 0.797737893  | 3.551789865 | 0.184231816 | 0.999981012 | NA |
| ASV_16s_22110 | 0.114041804 | 1.065158195  | 3.551224794 | 0.385085935 | 0.999768036 | NA |
| ASV_16s_22111 | 0.114041804 | 1.065158195  | 3.551224794 | 0.385085935 | 0.999768036 | NA |
| ASV_16s_22112 | 0.114041804 | 1.065158195  | 3.551224794 | 0.385085935 | 0.999768036 | NA |
| ASV_16s_22113 | 0.104100841 | -0.077871832 | 3.551038663 | 0.623392521 | NA          | NA |
| ASV_16s_22114 | 0.104100841 | -0.077871832 | 3.551038663 | 0.623392521 | NA          | NA |
| ASV_16s_22115 | 0.104100841 | -0.077871832 | 3.551038663 | 0.623392521 | NA          | NA |
| ASV_16s_22116 | 0.104100841 | -0.077871832 | 3.551038663 | 0.623392521 | NA          | NA |
| ASV_16s_22117 | 0.104100841 | -0.077871832 | 3.551038663 | 0.623392521 | NA          | NA |
| ASV_16s_22118 | 0.104100841 | -0.077871832 | 3.551038663 | 0.623392521 | NA          | NA |
| ASV_16s_22119 | 0.096434406 | -0.077729134 | 3.551079987 | 0.595295183 | 0.999017374 | NA |
| ASV_16s_22120 | 0.088767971 | -0.077572355 | 3.551128355 | 0.56863218  | NA          | NA |
| ASV_16s_22121 | 0.088767971 | -0.077572355 | 3.551128355 | 0.56863218  | NA          | NA |
| ASV_16s_22122 | 0.088767971 | -0.077572355 | 3.551128355 | 0.56863218  | NA          | NA |
| ASV_16s_22123 | 0.088767971 | -0.077572355 | 3.551128355 | 0.56863218  | NA          | NA |
| ASV_16s_22124 | 0.088767971 | -0.077572355 | 3.551128355 | 0.56863218  | NA          | NA |
| ASV_16s_22125 | 0.088767971 | -0.077572355 | 3.551128355 | 0.56863218  | NA          | NA |
| ASV_16s_22126 | 0.088767971 | -0.077572355 | 3.551128355 | 0.56863218  | NA          | NA |
| ASV_16s_22127 | 0.088767971 | -0.077572355 | 3.551128355 | 0.56863218  | NA          | NA |
| ASV_16s_22128 | 0.088767971 | -0.077572355 | 3.551128355 | 0.56863218  | NA          | NA |
| ASV_16s_22129 | 0.088767971 | -0.077572355 | 3.551128355 | 0.56863218  | NA          | NA |
| ASV_16s_22130 | 0.058176696 | 0.220308354  | 3.551073044 | 0.260945167 | NA          | NA |
| ASV_16s_22131 | 0.058176696 | 0.220308354  | 3.551073044 | 0.260945167 | NA          | NA |
| ASV_16s_22132 | 0.058176696 | 0.220308354  | 3.551073044 | 0.260945167 | NA          | NA |
| ASV_16s_22133 | 0.058176696 | 0.220308354  | 3.551073044 | 0.260945167 | NA          | NA |
| ASV_16s_22134 | 0.061771237 | 0.220286909  | 3.551044389 | 0.280176372 | 0.999920645 | NA |
| ASV_16s_22135 | 0.063526518 | 0.220277063  | 3.551031556 | 0.28937928  | 0.999911456 | NA |
| ASV_16s_22136 | 0.066084685 | 0.220264012  | 3.551014068 | 0.302628253 | NA          | NA |
| ASV_16s_22137 | 0.066084685 | 0.220264012  | 3.551014068 | 0.302628253 | NA          | NA |
| ASV_16s_22138 | 0.066084685 | 0.220264012  | 3.551014068 | 0.302628253 | NA          | NA |
| ASV_16s_22139 | 0.066024701 | 0.220264092  | 3.551014459 | 0.302320371 | 0.99989732  | NA |
| ASV_16s_22140 | 0.065952719 | 0.220264669  | 3.551014937 | 0.301951587 | NA          | NA |
| ASV_16s_22141 | 0.065952719 | 0.220264669  | 3.551014937 | 0.301951587 | NA          | NA |
| ASV_16s_22142 | 0.068283262 | 0.444408276  | 3.550939413 | 0.426293302 | 0.999674128 | NA |
| ASV_16s_22143 | 0.109904138 | 0.310959398  | 3.551181963 | 0.62530684  | 0.998846158 | NA |
| ASV_16s_22144 | 0.112788822 | 0.310958541  | 3.551166904 | 0.635404714 | NA          | NA |
| ASV_16s_22145 | 0.112610321 | 0.310958599  | 3.551167814 | 0.634777147 | 0.998788241 | NA |
| ASV_16s_22146 | 0.113740767 | 0.310958232  | 3.551162101 | 0.63875748  | 0.998763329 | NA |
| ASV_16s_22147 | 0.098346734 | 0.310964029  | 3.551251071 | 0.585947522 | NA          | NA |
| ASV_16s_22148 | 0.098346734 | 0.310964029  | 3.551251071 | 0.585947522 | NA          | NA |
| ASV_16s_22149 | 0.112431819 | 0.310958658  | 3.551168727 | 0.634149967 | NA          | NA |
| ASV_16s_22150 | 0.069615001 | 0.595452105  | 3.550943994 | 0.272714143 | NA          | NA |
| ASV_16s_22151 | 0.12350419  | 0.998283692  | 3.551512305 | 0.41759707  | 0.99969579  | NA |
| ASV_16s_22152 | 0.155609712 | -0.738508676 | 3.551282541 | 0.387639877 | 0.999762841 | NA |
| ASV_16s_22153 | 0.066763062 | 0.440714382  | 3.551104056 | 0.316473312 | 0.999880146 | NA |
| ASV_16s_22154 | 0.143388141 | 0.641206555  | 3.551799589 | 0.583388228 | 0.999080264 | NA |
| ASV_16s_22155 | 0.098401138 | 0.13806279   | 3.551524614 | 0.472544939 | 0.99954093  | NA |
| ASV_16s_22156 | 0.103317211 | -0.096640759 | 3.551624739 | 0.330724438 | 0.999860936 | NA |
| ASV_16s_22157 | 0.102086538 | -0.060552263 | 3.551296176 | 0.632571539 | 0.9988019   | NA |



|               |             |              |             |             |             |    |
|---------------|-------------|--------------|-------------|-------------|-------------|----|
| ASV_16s_22158 | 0.094218673 | -0.048203669 | 3.551475647 | 0.598649072 | 0.998999151 | NA |
| ASV_16s_22159 | 0.094714191 | -0.040943028 | 3.551526172 | 0.600043139 | 0.998999151 | NA |
| ASV_16s_22160 | 0.106751607 | 0.318898015  | 3.551841133 | 0.453475782 | 0.999599634 | NA |
| ASV_16s_22161 | 0.075327203 | 0.849877443  | 3.551831272 | 0.350728298 | 0.999830517 | NA |
| ASV_16s_22162 | 0.080323441 | 0.634287559  | 3.551862434 | 0.449431634 | 0.999611387 | NA |
| ASV_16s_22163 | 0.121949343 | 0.98230637   | 3.551549703 | 0.455877115 | 0.999592542 | NA |
| ASV_16s_22164 | 0.200537467 | 0.488673855  | 3.550522039 | 0.993526325 | 0.994932291 | NA |
| ASV_16s_22165 | 0.135941797 | 0.294966897  | 3.551819724 | 0.528530692 | NA          | NA |
| ASV_16s_22166 | 0.165869865 | -0.578291053 | 3.550961829 | 0.633862995 | NA          | NA |
| ASV_16s_22167 | 0.16446453  | 1.076406907  | 3.551255899 | 0.558426418 | NA          | NA |
| ASV_16s_22168 | 0.111133968 | 0.885474541  | 3.551558723 | 0.417476424 | 0.999696083 | NA |
| ASV_16s_22169 | 0.078277197 | 0.286824816  | 3.551817396 | 0.381931104 | 0.999774345 | NA |
| ASV_16s_22170 | 0.078277197 | 0.286824816  | 3.551817396 | 0.381931104 | 0.999774345 | NA |
| ASV_16s_22171 | 0.053961612 | 0.292638248  | 3.551897698 | 0.289616399 | 0.99991121  | NA |
| ASV_16s_22172 | 0.053961612 | 0.292638248  | 3.551897698 | 0.289616399 | 0.99991121  | NA |
| ASV_16s_22173 | 0.053961612 | 0.292638248  | 3.551897698 | 0.289616399 | 0.99991121  | NA |
| ASV_16s_22174 | 0.074836568 | 0.287223869  | 3.55183057  | 0.369992218 | 0.999797151 | NA |
| ASV_16s_22175 | 0.026850938 | 0.300516924  | 3.551955409 | 0.162541674 | 0.999987648 | NA |
| ASV_16s_22176 | 0.228805462 | 1.078940713  | 3.550973851 | 0.721773167 | NA          | NA |
| ASV_16s_22177 | 0.088219023 | 0.830291462  | 3.551661034 | 0.360929948 | 0.999813363 | NA |
| ASV_16s_22178 | 0.202757178 | -0.546449072 | 3.550629783 | 0.73464607  | NA          | NA |
| ASV_16s_22179 | 0.164321757 | 0.248548639  | 3.551516606 | 0.719535615 | 0.99818109  | NA |
| ASV_16s_22180 | 0.130733325 | 1.110152962  | 3.551122183 | 0.421049286 | NA          | NA |
| ASV_16s_22181 | 0.130733325 | 1.110152962  | 3.551122183 | 0.421049286 | NA          | NA |
| ASV_16s_22182 | 0.130733325 | 1.110152962  | 3.551122183 | 0.421049286 | NA          | NA |
| ASV_16s_22183 | 0.130733325 | 1.110152962  | 3.551122183 | 0.421049286 | NA          | NA |
| ASV_16s_22184 | 0.130733325 | 1.110152962  | 3.551122183 | 0.421049286 | NA          | NA |
| ASV_16s_22185 | 0.074496109 | -0.077183526 | 3.551244629 | 0.502079373 | NA          | NA |
| ASV_16s_22186 | 0.074496109 | -0.077183526 | 3.551244629 | 0.502079373 | NA          | NA |
| ASV_16s_22187 | 0.074496109 | -0.077183526 | 3.551244629 | 0.502079373 | NA          | NA |
| ASV_16s_22188 | 0.074496109 | -0.077183526 | 3.551244629 | 0.502079373 | NA          | NA |
| ASV_16s_22189 | 0.104346374 | 0.213226097  | 3.55057036  | 0.423724877 | 0.999680632 | NA |
| ASV_16s_22190 | 0.105218953 | -0.42781358  | 3.551198137 | 0.450458845 | 0.999608425 | NA |
| ASV_16s_22191 | 0.19304329  | 0.209004981  | 3.550949621 | 1.37585255  | 0.986299423 | NA |
| ASV_16s_22192 | 0.172606416 | 0.473379106  | 3.551063722 | 1.152086473 | 0.991988582 | NA |
| ASV_16s_22193 | 0.166693753 | 0.178878817  | 3.550995441 | 1.026531861 | 0.994389111 | NA |
| ASV_16s_22194 | 0.16443914  | -0.028501715 | 3.551013095 | 0.906578402 | NA          | NA |
| ASV_16s_22195 | 0.16443914  | -0.028501715 | 3.551013095 | 0.906578402 | NA          | NA |
| ASV_16s_22196 | 0.16443914  | -0.028501715 | 3.551013095 | 0.906578402 | NA          | NA |
| ASV_16s_22197 | 0.16443914  | -0.028501715 | 3.551013095 | 0.906578402 | NA          | NA |
| ASV_16s_22198 | 0.13701264  | 0.304958086  | 3.551084007 | 0.814185907 | 0.997296472 | NA |
| ASV_16s_22199 | 0.177239999 | 0.363535599  | 3.55101694  | 1.270198337 | 0.989219783 | NA |
| ASV_16s_22200 | 0.12878469  | -0.04510811  | 3.551243875 | 0.792516515 | 0.997519577 | NA |
| ASV_16s_22201 | 0.128755466 | -0.028095462 | 3.55114863  | 0.770231587 | NA          | NA |
| ASV_16s_22202 | 0.128755466 | -0.028095462 | 3.55114863  | 0.770231587 | NA          | NA |
| ASV_16s_22203 | 0.098287175 | -0.022809878 | 3.551330761 | 0.662219872 | NA          | NA |
| ASV_16s_22204 | 0.098287175 | -0.022809878 | 3.551330761 | 0.662219872 | NA          | NA |
| ASV_16s_22205 | 0.112305605 | -0.072807359 | 3.55104906  | 0.675995587 | NA          | NA |
| ASV_16s_22206 | 0.130783434 | 0.412874243  | 3.551355759 | 0.709568959 | 0.998261128 | NA |
| ASV_16s_22207 | 0.1465541   | 0.250110376  | 3.551239293 | 1.001919282 | 0.994797516 | NA |
| ASV_16s_22208 | 0.082023478 | -0.071883945 | 3.551244001 | 0.562053084 | NA          | NA |
| ASV_16s_22209 | 0.082023478 | -0.071883945 | 3.551244001 | 0.562053084 | NA          | NA |
| ASV_16s_22210 | 0.082023478 | -0.071883945 | 3.551244001 | 0.562053084 | NA          | NA |
| ASV_16s_22211 | 0.082023478 | -0.071883945 | 3.551244001 | 0.562053084 | NA          | NA |
| ASV_16s_22212 | 0.082023478 | -0.071883945 | 3.551244001 | 0.562053084 | NA          | NA |
| ASV_16s_22213 | 0.082023478 | -0.071883945 | 3.551244001 | 0.562053084 | NA          | NA |
| ASV_16s_22214 | 0.082023478 | -0.071883945 | 3.551244001 | 0.562053084 | NA          | NA |
| ASV_16s_22215 | 0.082023478 | -0.071883945 | 3.551244001 | 0.562053084 | NA          | NA |
| ASV_16s_22216 | 0.082023478 | -0.071883945 | 3.551244001 | 0.562053084 | NA          | NA |
| ASV_16s_22217 | 0.080549653 | -0.071417629 | 3.551256402 | 0.555143005 | NA          | NA |
| ASV_16s_22218 | 0.080549653 | -0.071417629 | 3.551256402 | 0.555143005 | NA          | NA |
| ASV_16s_22219 | 0.080549653 | -0.071417629 | 3.551256402 | 0.555143005 | NA          | NA |
| ASV_16s_22220 | 0.080549653 | -0.071417629 | 3.551256402 | 0.555143005 | NA          | NA |
| ASV_16s_22221 | 0.080549653 | -0.071417629 | 3.551256402 | 0.555143005 | NA          | NA |
| ASV_16s_22222 | 0.080549653 | -0.071417629 | 3.551256402 | 0.555143005 | NA          | NA |
| ASV_16s_22223 | 0.080549653 | -0.071417629 | 3.551256402 | 0.555143005 | NA          | NA |
| ASV_16s_22224 | 0.080549653 | -0.071417629 | 3.551256402 | 0.555143005 | NA          | NA |

|               |             |              |             |             |             |    |
|---------------|-------------|--------------|-------------|-------------|-------------|----|
| ASV_16s_22225 | 0.080549653 | -0.071417629 | 3.551256402 | 0.555143005 | NA          | NA |
| ASV_16s_22226 | 0.102947844 | 0.185706268  | 3.551373568 | 0.563187012 | 0.999180655 | NA |
| ASV_16s_22227 | 0.101336187 | 0.270187696  | 3.551301439 | 0.627755087 | 0.998831367 | NA |
| ASV_16s_22228 | 0.116386758 | 0.311501229  | 3.550929575 | 0.640573476 | 0.998751849 | NA |
| ASV_16s_22229 | 0.089364742 | -0.072329097 | 3.551185074 | 0.589149696 | 0.999050183 | NA |
| ASV_16s_22230 | 0.116926087 | 0.393286025  | 3.551411333 | 0.671685704 | 0.998543957 | NA |
| ASV_16s_22231 | 0.135941797 | -0.073132754 | 3.550956604 | 0.762082645 | NA          | NA |
| ASV_16s_22232 | 0.135941797 | -0.073132754 | 3.550956604 | 0.762082645 | NA          | NA |
| ASV_16s_22233 | 0.136666225 | 0.267608004  | 3.550940404 | 0.790214972 | 0.997542535 | NA |
| ASV_16s_22234 | 0.099942849 | -0.072577706 | 3.551114664 | 0.633433688 | NA          | NA |
| ASV_16s_22235 | 0.099942849 | -0.072577706 | 3.551114664 | 0.633433688 | NA          | NA |
| ASV_16s_22236 | 0.099942849 | -0.072577706 | 3.551114664 | 0.633433688 | NA          | NA |
| ASV_16s_22237 | 0.112118389 | 0.360199755  | 3.551494907 | 0.694603819 | NA          | NA |
| ASV_16s_22238 | 0.112118389 | 0.360199755  | 3.551494907 | 0.694603819 | NA          | NA |
| ASV_16s_22239 | 0.112118389 | 0.360199755  | 3.551494907 | 0.694603819 | NA          | NA |
| ASV_16s_22240 | 0.112118389 | 0.360199755  | 3.551494907 | 0.694603819 | NA          | NA |
| ASV_16s_22241 | 0.112118389 | 0.360199755  | 3.551494907 | 0.694603819 | NA          | NA |
| ASV_16s_22242 | 0.112118389 | 0.360199755  | 3.551494907 | 0.694603819 | NA          | NA |
| ASV_16s_22243 | 0.112118389 | 0.360199755  | 3.551494907 | 0.694603819 | NA          | NA |
| ASV_16s_22244 | 0.112118389 | 0.360199755  | 3.551494907 | 0.694603819 | NA          | NA |
| ASV_16s_22245 | 0.109567351 | 0.347943589  | 3.551841322 | 0.517317239 | 0.99938057  | NA |
| ASV_16s_22246 | 0.129908474 | 0.324669479  | 3.551448809 | 0.552967309 | 0.999228498 | NA |
| ASV_16s_22247 | 0.099669374 | 0.357568726  | 3.55158018  | 0.651606829 | NA          | NA |
| ASV_16s_22248 | 0.099669374 | 0.357568726  | 3.55158018  | 0.651606829 | NA          | NA |
| ASV_16s_22249 | 0.099669374 | 0.357568726  | 3.55158018  | 0.651606829 | NA          | NA |
| ASV_16s_22250 | 0.099669374 | 0.357568726  | 3.55158018  | 0.651606829 | NA          | NA |
| ASV_16s_22251 | 0.099669374 | 0.357568726  | 3.55158018  | 0.651606829 | NA          | NA |
| ASV_16s_22252 | 0.099669374 | 0.357568726  | 3.55158018  | 0.651606829 | NA          | NA |
| ASV_16s_22253 | 0.099669374 | 0.357568726  | 3.55158018  | 0.651606829 | NA          | NA |
| ASV_16s_22254 | 0.099669374 | 0.357568726  | 3.55158018  | 0.651606829 | NA          | NA |
| ASV_16s_22255 | 0.099669374 | 0.357568726  | 3.55158018  | 0.651606829 | NA          | NA |
| ASV_16s_22256 | 0.099669374 | 0.357568726  | 3.55158018  | 0.651606829 | NA          | NA |
| ASV_16s_22257 | 0.099669374 | 0.357568726  | 3.55158018  | 0.651606829 | NA          | NA |
| ASV_16s_22258 | 0.099669374 | 0.357568726  | 3.55158018  | 0.651606829 | NA          | NA |
| ASV_16s_22259 | 0.099669374 | 0.357568726  | 3.55158018  | 0.651606829 | NA          | NA |
| ASV_16s_22260 | 0.099669374 | 0.357568726  | 3.55158018  | 0.651606829 | NA          | NA |
| ASV_16s_22261 | 0.099669374 | 0.357568726  | 3.55158018  | 0.651606829 | NA          | NA |
| ASV_16s_22262 | 0.099669374 | 0.357568726  | 3.55158018  | 0.651606829 | NA          | NA |
| ASV_16s_22263 | 0.099669374 | 0.357568726  | 3.55158018  | 0.651606829 | NA          | NA |
| ASV_16s_22264 | 0.099669374 | 0.357568726  | 3.55158018  | 0.651606829 | NA          | NA |
| ASV_16s_22265 | 0.099669374 | 0.357568726  | 3.55158018  | 0.651606829 | NA          | NA |
| ASV_16s_22266 | 0.099669374 | 0.357568726  | 3.55158018  | 0.651606829 | NA          | NA |
| ASV_16s_22267 | 0.099669374 | 0.357568726  | 3.55158018  | 0.651606829 | NA          | NA |
| ASV_16s_22268 | 0.099669374 | 0.357568726  | 3.55158018  | 0.651606829 | NA          | NA |
| ASV_16s_22269 | 0.129141068 | 0.315940068  | 3.55114177  | 0.717110075 | NA          | NA |
| ASV_16s_22270 | 0.129141068 | 0.315940068  | 3.55114177  | 0.717110075 | NA          | NA |
| ASV_16s_22271 | 0.129141068 | 0.315940068  | 3.55114177  | 0.717110075 | NA          | NA |
| ASV_16s_22272 | 0.129141068 | 0.315940068  | 3.55114177  | 0.717110075 | NA          | NA |
| ASV_16s_22273 | 0.113206378 | 0.315940174  | 3.55121907  | 0.659610027 | 0.998627193 | NA |
| ASV_16s_22274 | 0.113206378 | 0.315940174  | 3.55121907  | 0.659610027 | 0.998627193 | NA |
| ASV_16s_22275 | 0.112068186 | 0.315940183  | 3.551225421 | 0.655610578 | 0.998654043 | NA |
| ASV_16s_22276 | 0.111279569 | 0.436083629  | 3.551165768 | 0.830409103 | 0.997121092 | NA |
| ASV_16s_22277 | 0.111629144 | 0.315940262  | 3.551227883 | 0.654105064 | NA          | NA |
| ASV_16s_22278 | 0.111629144 | 0.315940262  | 3.551227883 | 0.654105064 | NA          | NA |
| ASV_16s_22279 | 0.111629144 | 0.315940262  | 3.551227883 | 0.654105064 | NA          | NA |
| ASV_16s_22280 | 0.111629144 | 0.315940262  | 3.551227883 | 0.654105064 | NA          | NA |
| ASV_16s_22281 | 0.134056336 | 0.315940042  | 3.5511217   | 0.735088669 | 0.998051366 | NA |
| ASV_16s_22282 | 0.107180601 | 0.315940224  | 3.551254194 | 0.638634395 | 0.998764104 | NA |
| ASV_16s_22283 | 0.126120003 | 0.315939975  | 3.551155061 | 0.705761688 | 0.998291074 | NA |
| ASV_16s_22284 | 0.104100841 | 0.315940339  | 3.55127371  | 0.628078141 | NA          | NA |
| ASV_16s_22285 | 0.104100841 | 0.315940339  | 3.55127371  | 0.628078141 | NA          | NA |
| ASV_16s_22286 | 0.104100841 | 0.315940339  | 3.55127371  | 0.628078141 | NA          | NA |
| ASV_16s_22287 | 0.104100841 | 0.315940339  | 3.55127371  | 0.628078141 | NA          | NA |
| ASV_16s_22288 | 0.104100841 | 0.315940339  | 3.55127371  | 0.628078141 | NA          | NA |
| ASV_16s_22289 | 0.104100841 | 0.315940339  | 3.55127371  | 0.628078141 | NA          | NA |
| ASV_16s_22290 | 0.104100841 | 0.315940339  | 3.55127371  | 0.628078141 | NA          | NA |
| ASV_16s_22291 | 0.104100841 | 0.315940339  | 3.55127371  | 0.628078141 | NA          | NA |

|               |             |             |             |             |             |    |
|---------------|-------------|-------------|-------------|-------------|-------------|----|
| ASV_16s_22292 | 0.104100841 | 0.315940339 | 3.55127371  | 0.628078141 | NA          | NA |
| ASV_16s_22293 | 0.104100841 | 0.315940339 | 3.55127371  | 0.628078141 | NA          | NA |
| ASV_16s_22294 | 0.104100841 | 0.315940339 | 3.55127371  | 0.628078141 | NA          | NA |
| ASV_16s_22295 | 0.104100841 | 0.315940339 | 3.55127371  | 0.628078141 | NA          | NA |
| ASV_16s_22296 | 0.104100841 | 0.315940339 | 3.55127371  | 0.628078141 | NA          | NA |
| ASV_16s_22297 | 0.104100841 | 0.315940339 | 3.55127371  | 0.628078141 | NA          | NA |
| ASV_16s_22298 | 0.104100841 | 0.315940339 | 3.55127371  | 0.628078141 | NA          | NA |
| ASV_16s_22299 | 0.11326769  | 0.606677858 | 3.551372249 | 0.655767246 | 0.998652998 | NA |
| ASV_16s_22300 | 0.195984657 | 0.31593979  | 3.550953726 | 0.977631943 | NA          | NA |
| ASV_16s_22301 | 0.140166692 | 0.595956478 | 3.550746271 | 0.526740434 | NA          | NA |
| ASV_16s_22302 | 0.099139086 | 0.686800006 | 3.551221513 | 0.539833798 | NA          | NA |
| ASV_16s_22303 | 0.099139086 | 0.686800006 | 3.551221513 | 0.539833798 | NA          | NA |
| ASV_16s_22304 | 0.099139086 | 0.686800006 | 3.551221513 | 0.539833798 | NA          | NA |
| ASV_16s_22305 | 0.214430563 | 0.733869291 | 3.551077296 | 0.992713709 | 0.99494522  | NA |
| ASV_16s_22306 | 0.162740341 | 0.73333702  | 3.551234991 | 0.810543859 | NA          | NA |
| ASV_16s_22307 | 0.162740341 | 0.73333702  | 3.551234991 | 0.810543859 | NA          | NA |
| ASV_16s_22308 | 0.162740341 | 0.73333702  | 3.551234991 | 0.810543859 | NA          | NA |
| ASV_16s_22309 | 0.162740341 | 0.73333702  | 3.551234991 | 0.810543859 | NA          | NA |
| ASV_16s_22310 | 0.162740341 | 0.73333702  | 3.551234991 | 0.810543859 | NA          | NA |
| ASV_16s_22311 | 0.161364782 | 0.878776353 | 3.55138017  | 0.680939885 | 0.998477938 | NA |
| ASV_16s_22312 | 0.162740341 | 0.73333702  | 3.551234991 | 0.810543859 | NA          | NA |
| ASV_16s_22313 | 0.13771262  | 0.730552928 | 3.551347799 | 0.726809453 | NA          | NA |
| ASV_16s_22314 | 0.13771262  | 0.730552928 | 3.551347799 | 0.726809453 | NA          | NA |
| ASV_16s_22315 | 0.13771262  | 0.730552928 | 3.551347799 | 0.726809453 | NA          | NA |
| ASV_16s_22316 | 0.13771262  | 0.730552928 | 3.551347799 | 0.726809453 | NA          | NA |
| ASV_16s_22317 | 0.13771262  | 0.730552928 | 3.551347799 | 0.726809453 | NA          | NA |
| ASV_16s_22318 | 0.13771262  | 0.730552928 | 3.551347799 | 0.726809453 | NA          | NA |
| ASV_16s_22319 | 0.13771262  | 0.730552928 | 3.551347799 | 0.726809453 | NA          | NA |
| ASV_16s_22320 | 0.13771262  | 0.730552928 | 3.551347799 | 0.726809453 | NA          | NA |
| ASV_16s_22321 | 0.13771262  | 0.730552928 | 3.551347799 | 0.726809453 | NA          | NA |
| ASV_16s_22322 | 0.13771262  | 0.730552928 | 3.551347799 | 0.726809453 | NA          | NA |
| ASV_16s_22323 | 0.13771262  | 0.730552928 | 3.551347799 | 0.726809453 | NA          | NA |
| ASV_16s_22324 | 0.13771262  | 0.730552928 | 3.551347799 | 0.726809453 | NA          | NA |
| ASV_16s_22325 | 0.13771262  | 0.730552928 | 3.551347799 | 0.726809453 | NA          | NA |
| ASV_16s_22326 | 0.13771262  | 0.730552928 | 3.551347799 | 0.726809453 | NA          | NA |
| ASV_16s_22327 | 0.13771262  | 0.730552928 | 3.551347799 | 0.726809453 | NA          | NA |
| ASV_16s_22328 | 0.13771262  | 0.730552928 | 3.551347799 | 0.726809453 | NA          | NA |
| ASV_16s_22329 | 0.13771262  | 0.730552928 | 3.551347799 | 0.726809453 | NA          | NA |
| ASV_16s_22330 | 0.13771262  | 0.730552928 | 3.551347799 | 0.726809453 | NA          | NA |
| ASV_16s_22331 | 0.13771262  | 0.730552928 | 3.551347799 | 0.726809453 | NA          | NA |
| ASV_16s_22332 | 0.068216726 | 0.661183049 | 3.551733862 | 0.467183642 | 0.999557991 | NA |
| ASV_16s_22333 | 0.068216726 | 0.661183049 | 3.551733862 | 0.467183642 | 0.999557991 | NA |
| ASV_16s_22334 | 0.068216726 | 0.661183049 | 3.551733862 | 0.467183642 | 0.999557991 | NA |
| ASV_16s_22335 | 0.068216726 | 0.661183049 | 3.551733862 | 0.467183642 | 0.999557991 | NA |
| ASV_16s_22336 | 0.068216726 | 0.661183049 | 3.551733862 | 0.467183642 | 0.999557991 | NA |
| ASV_16s_22337 | 0.068216726 | 0.661183049 | 3.551733862 | 0.467183642 | 0.999557991 | NA |
| ASV_16s_22338 | 0.068216726 | 0.661183049 | 3.551733862 | 0.467183642 | 0.999557991 | NA |
| ASV_16s_22339 | 0.068216726 | 0.661183049 | 3.551733862 | 0.467183642 | 0.999557991 | NA |
| ASV_16s_22340 | 0.068216726 | 0.661183049 | 3.551733862 | 0.467183642 | 0.999557991 | NA |
| ASV_16s_22341 | 0.12802812  | 0.692211152 | 3.551129732 | 0.655508316 | NA          | NA |
| ASV_16s_22342 | 0.12802812  | 0.692211152 | 3.551129732 | 0.655508316 | NA          | NA |
| ASV_16s_22343 | 0.12802812  | 0.692211152 | 3.551129732 | 0.655508316 | NA          | NA |
| ASV_16s_22344 | 0.12802812  | 0.692211152 | 3.551129732 | 0.655508316 | NA          | NA |
| ASV_16s_22345 | 0.12802812  | 0.692211152 | 3.551129732 | 0.655508316 | NA          | NA |
| ASV_16s_22346 | 0.129183988 | 0.692227657 | 3.551124613 | 0.659173685 | 0.99863014  | NA |
| ASV_16s_22347 | 0.118239688 | 0.692049755 | 3.551177069 | 0.624940581 | 0.99884836  | NA |
| ASV_16s_22348 | 0.130174731 | 0.692242296 | 3.551120297 | 0.662325309 | 0.998608762 | NA |
| ASV_16s_22349 | 0.131660847 | 0.692264688 | 3.551113945 | 0.667069497 | NA          | NA |
| ASV_16s_22350 | 0.131660847 | 0.692264688 | 3.551113945 | 0.667069497 | NA          | NA |
| ASV_16s_22351 | 0.131660847 | 0.692264688 | 3.551113945 | 0.667069497 | NA          | NA |
| ASV_16s_22352 | 0.131660847 | 0.692264688 | 3.551113945 | 0.667069497 | NA          | NA |
| ASV_16s_22353 | 0.131660847 | 0.692264688 | 3.551113945 | 0.667069497 | NA          | NA |
| ASV_16s_22354 | 0.131660847 | 0.692264688 | 3.551113945 | 0.667069497 | NA          | NA |
| ASV_16s_22355 | 0.131660847 | 0.692264688 | 3.551113945 | 0.667069497 | NA          | NA |
| ASV_16s_22356 | 0.131660847 | 0.692264688 | 3.551113945 | 0.667069497 | NA          | NA |
| ASV_16s_22357 | 0.131660847 | 0.692264688 | 3.551113945 | 0.667069497 | NA          | NA |
| ASV_16s_22358 | 0.131660847 | 0.692264688 | 3.551113945 | 0.667069497 | NA          | NA |

|               |             |             |             |             |             |    |
|---------------|-------------|-------------|-------------|-------------|-------------|----|
| ASV_16s_22359 | 0.131660847 | 0.692264688 | 3.551113945 | 0.667069497 | NA          | NA |
| ASV_16s_22360 | 0.131660847 | 0.692264688 | 3.551113945 | 0.667069497 | NA          | NA |
| ASV_16s_22361 | 0.131660847 | 0.692264688 | 3.551113945 | 0.667069497 | NA          | NA |
| ASV_16s_22362 | 0.131660847 | 0.692264688 | 3.551113945 | 0.667069497 | NA          | NA |
| ASV_16s_22363 | 0.121639026 | 0.692108361 | 3.551159786 | 0.63543215  | 0.998784165 | NA |
| ASV_16s_22364 | 0.139294324 | 0.692367329 | 3.55108344  | 0.691699652 | 0.998398703 | NA |
| ASV_16s_22365 | 0.120386299 | 0.692087133 | 3.551166046 | 0.631547677 | 0.998808205 | NA |
| ASV_16s_22366 | 0.117880844 | 0.692043344 | 3.55117896  | 0.623829074 | 0.998855024 | NA |
| ASV_16s_22367 | 0.115375389 | 0.691998707 | 3.551192429 | 0.616180056 | 0.998900188 | NA |
| ASV_16s_22368 | 0.114122661 | 0.691975166 | 3.551199381 | 0.612382501 | 0.998922159 | NA |
| ASV_16s_22369 | 0.111617206 | 0.69192653  | 3.551213746 | 0.604843356 | 0.9989649   | NA |
| ASV_16s_22370 | 0.104100841 | 0.691766886 | 3.551260923 | 0.58270477  | NA          | NA |
| ASV_16s_22371 | 0.104100841 | 0.691766886 | 3.551260923 | 0.58270477  | NA          | NA |
| ASV_16s_22372 | 0.104100841 | 0.691766886 | 3.551260923 | 0.58270477  | NA          | NA |
| ASV_16s_22373 | 0.104100841 | 0.691766886 | 3.551260923 | 0.58270477  | NA          | NA |
| ASV_16s_22374 | 0.104100841 | 0.691766886 | 3.551260923 | 0.58270477  | NA          | NA |
| ASV_16s_22375 | 0.104100841 | 0.691766886 | 3.551260923 | 0.58270477  | NA          | NA |
| ASV_16s_22376 | 0.104100841 | 0.691766886 | 3.551260923 | 0.58270477  | NA          | NA |
| ASV_16s_22377 | 0.104100841 | 0.691766886 | 3.551260923 | 0.58270477  | NA          | NA |
| ASV_16s_22378 | 0.104100841 | 0.691766886 | 3.551260923 | 0.58270477  | NA          | NA |
| ASV_16s_22379 | 0.104100841 | 0.691766886 | 3.551260923 | 0.58270477  | NA          | NA |
| ASV_16s_22380 | 0.104100841 | 0.691766886 | 3.551260923 | 0.58270477  | NA          | NA |
| ASV_16s_22381 | 0.104100841 | 0.691766886 | 3.551260923 | 0.58270477  | NA          | NA |
| ASV_16s_22382 | 0.104100841 | 0.691766886 | 3.551260923 | 0.58270477  | NA          | NA |
| ASV_16s_22383 | 0.152929637 | 0.69252678  | 3.551036446 | 0.736816594 | NA          | NA |
| ASV_16s_22384 | 0.15265291  | 0.692523825 | 3.551037317 | 0.735889153 | NA          | NA |
| ASV_16s_22385 | 0.144571753 | 0.293904725 | 3.551794255 | 0.555208903 | NA          | NA |
| ASV_16s_22386 | 0.085672053 | 0.302035273 | 3.551948878 | 0.401711991 | 0.99973277  | NA |
| ASV_16s_22387 | 0.085672053 | 0.302035273 | 3.551948878 | 0.401711991 | 0.99973277  | NA |
| ASV_16s_22388 | 0.085672053 | 0.302035273 | 3.551948878 | 0.401711991 | 0.99973277  | NA |
| ASV_16s_22389 | 0.085672053 | 0.302035273 | 3.551948878 | 0.401711991 | 0.99973277  | NA |
| ASV_16s_22390 | 0.085672053 | 0.302035273 | 3.551948878 | 0.401711991 | 0.99973277  | NA |
| ASV_16s_22391 | 0.085672053 | 0.302035273 | 3.551948878 | 0.401711991 | 0.99973277  | NA |
| ASV_16s_22392 | 0.085672053 | 0.302035273 | 3.551948878 | 0.401711991 | 0.99973277  | NA |
| ASV_16s_22393 | 0.085672053 | 0.302035273 | 3.551948878 | 0.401711991 | 0.99973277  | NA |
| ASV_16s_22394 | 0.085672053 | 0.302035273 | 3.551948878 | 0.401711991 | 0.99973277  | NA |
| ASV_16s_22395 | 0.085672053 | 0.302035273 | 3.551948878 | 0.401711991 | 0.99973277  | NA |
| ASV_16s_22396 | 0.085672053 | 0.302035273 | 3.551948878 | 0.401711991 | 0.99973277  | NA |
| ASV_16s_22397 | 0.085672053 | 0.302035273 | 3.551948878 | 0.401711991 | 0.99973277  | NA |
| ASV_16s_22398 | 0.085672053 | 0.302035273 | 3.551948878 | 0.401711991 | 0.99973277  | NA |
| ASV_16s_22399 | 0.085672053 | 0.302035273 | 3.551948878 | 0.401711991 | 0.99973277  | NA |
| ASV_16s_22400 | 0.085672053 | 0.302035273 | 3.551948878 | 0.401711991 | 0.99973277  | NA |
| ASV_16s_22401 | 0.085672053 | 0.302035273 | 3.551948878 | 0.401711991 | 0.99973277  | NA |
| ASV_16s_22402 | 0.085672053 | 0.302035273 | 3.551948878 | 0.401711991 | 0.99973277  | NA |
| ASV_16s_22403 | 0.085672053 | 0.302035273 | 3.551948878 | 0.401711991 | 0.99973277  | NA |
| ASV_16s_22404 | 0.085672053 | 0.302035273 | 3.551948878 | 0.401711991 | 0.99973277  | NA |
| ASV_16s_22405 | 0.085672053 | 0.302035273 | 3.551948878 | 0.401711991 | 0.99973277  | NA |
| ASV_16s_22406 | 0.085672053 | 0.302035273 | 3.551948878 | 0.401711991 | 0.99973277  | NA |
| ASV_16s_22407 | 0.085672053 | 0.302035273 | 3.551948878 | 0.401711991 | 0.99973277  | NA |
| ASV_16s_22408 | 0.085672053 | 0.302035273 | 3.551948878 | 0.401711991 | 0.99973277  | NA |
| ASV_16s_22409 | 0.085672053 | 0.302035273 | 3.551948878 | 0.401711991 | 0.99973277  | NA |
| ASV_16s_22410 | 0.085672053 | 0.302035273 | 3.551948878 | 0.401711991 | 0.99973277  | NA |
| ASV_16s_22411 | 0.085672053 | 0.302035273 | 3.551948878 | 0.401711991 | 0.99973277  | NA |
| ASV_16s_22412 | 0.085672053 | 0.302035273 | 3.551948878 | 0.401711991 | 0.99973277  | NA |
| ASV_16s_22413 | 0.085672053 | 0.302035273 | 3.551948878 | 0.401711991 | 0.99973277  | NA |
| ASV_16s_22414 | 0.085672053 | 0.302035273 | 3.551948878 | 0.401711991 | 0.99973277  | NA |
| ASV_16s_22415 | 0.085672053 | 0.302035273 | 3.551948878 | 0.401711991 | 0.99973277  | NA |
| ASV_16s_22416 | 0.085672053 | 0.302035273 | 3.551948878 | 0.401711991 | 0.99973277  | NA |
| ASV_16s_22417 | 0.085672053 | 0.302035273 | 3.551948878 | 0.401711991 | 0.99973277  | NA |
| ASV_16s_22418 | 0.085672053 | 0.302035273 | 3.551948878 | 0.401711991 | 0.99973277  | NA |
| ASV_16s_22419 | 0.085672053 | 0.302035273 | 3.551948878 | 0.401711991 | 0.99973277  | NA |
| ASV_16s_22420 | 0.085672053 | 0.302035273 | 3.551948878 | 0.401711991 | 0.99973277  | NA |
| ASV_16s_22421 | 0.085672053 | 0.302035273 | 3.551948878 | 0.401711991 | 0.99973277  | NA |
| ASV_16s_22422 | 0.085672053 | 0.302035273 | 3.551948878 | 0.401711991 | 0.99973277  | NA |
| ASV_16s_22423 | 0.085672053 | 0.302035273 | 3.551948878 | 0.401711991 | 0.99973277  | NA |
| ASV_16s_22424 | 0.085672053 | 0.302035273 | 3.551948878 | 0.401711991 | 0.99973277  | NA |
| ASV_16s_22425 | 0.085672053 | 0.302035273 | 3.551948878 | 0.401711991 | 0.99973277  | NA |

|               |             |              |             |             |             |    |
|---------------|-------------|--------------|-------------|-------------|-------------|----|
| ASV_16s_22426 | 0.085672053 | 0.302035273  | 3.551948878 | 0.401711991 | 0.99973277  | NA |
| ASV_16s_22427 | 0.085700573 | 0.098378674  | 3.551834694 | 0.496629442 | 0.99945873  | NA |
| ASV_16s_22428 | 0.085706277 | 0.064996447  | 3.551811674 | 0.50919831  | 0.999412099 | NA |
| ASV_16s_22429 | 0.087225566 | 0.054310029  | 3.551798355 | 0.516308922 | 0.999384546 | NA |
| ASV_16s_22430 | 0.087225566 | 0.054310029  | 3.551798355 | 0.516308922 | 0.999384546 | NA |
| ASV_16s_22431 | 0.087225566 | 0.054310029  | 3.551798355 | 0.516308922 | 0.999384546 | NA |
| ASV_16s_22432 | 0.087484485 | 0.021858727  | 3.55177565  | 0.527540332 | 0.999339261 | NA |
| ASV_16s_22433 | 0.087743404 | -0.009817875 | 3.551749468 | 0.536426659 | 0.999301869 | NA |
| ASV_16s_22434 | 0.087743404 | -0.009817875 | 3.551749468 | 0.536426659 | 0.999301869 | NA |
| ASV_16s_22435 | 0.085717686 | 0.003026355  | 3.551771493 | 0.52735934  | 0.999340008 | NA |
| ASV_16s_22436 | 0.098076464 | -0.07153524  | 3.551625779 | 0.586034044 | 0.999066531 | NA |
| ASV_16s_22437 | 0.087743404 | -0.009817875 | 3.551749468 | 0.536426659 | 0.999301869 | NA |
| ASV_16s_22438 | 0.087743404 | -0.009817875 | 3.551749468 | 0.536426659 | 0.999301869 | NA |
| ASV_16s_22439 | 0.087743404 | -0.009817875 | 3.551749468 | 0.536426659 | 0.999301869 | NA |
| ASV_16s_22440 | 0.088002323 | -0.040952106 | 3.551719272 | 0.54296071  | 0.999273478 | NA |
| ASV_16s_22441 | 0.087242678 | -0.036299584 | 3.5517287   | 0.539625787 | 0.999288064 | NA |
| ASV_16s_22442 | 0.08572339  | -0.026846797 | 3.551747778 | 0.533052008 | 0.999316233 | NA |
| ASV_16s_22443 | 0.099627015 | -0.10639632  | 3.551584801 | 0.597236075 | 0.999006856 | NA |
| ASV_16s_22444 | 0.088002323 | -0.040952106 | 3.551719272 | 0.54296071  | 0.999273478 | NA |
| ASV_16s_22445 | 0.088002323 | -0.040952106 | 3.551719272 | 0.54296071  | 0.999273478 | NA |
| ASV_16s_22446 | 0.088261241 | -0.071074787 | 3.551691973 | 0.546758522 | 0.999256622 | NA |
| ASV_16s_22447 | 0.088261241 | -0.071074787 | 3.551691973 | 0.546758522 | 0.999256622 | NA |
| ASV_16s_22448 | 0.088261241 | -0.071074787 | 3.551691973 | 0.546758522 | 0.999256622 | NA |
| ASV_16s_22449 | 0.08852016  | -0.100244921 | 3.551668068 | 0.548042446 | 0.999250864 | NA |
| ASV_16s_22450 | 0.092395058 | -0.12097464  | 3.551623457 | 0.564280087 | 0.999175422 | NA |
| ASV_16s_22451 | 0.08852016  | -0.100244921 | 3.551668068 | 0.548042446 | 0.999250864 | NA |
| ASV_16s_22452 | 0.08852016  | -0.100244921 | 3.551668068 | 0.548042446 | 0.999250864 | NA |
| ASV_16s_22453 | 0.122607103 | -0.298180569 | 3.551286819 | 0.687171695 | 0.998432373 | NA |
| ASV_16s_22454 | 0.089037998 | -0.156853727 | 3.551622914 | 0.543087688 | 0.999272918 | NA |
| ASV_16s_22455 | 0.087265495 | -0.147903876 | 3.551642768 | 0.536399977 | 0.999301983 | NA |
| ASV_16s_22456 | 0.089296917 | -0.184383822 | 3.551604107 | 0.536919301 | 0.999299755 | NA |
| ASV_16s_22457 | 0.087524413 | -0.175892754 | 3.551622964 | 0.530529159 | 0.99932684  | NA |
| ASV_16s_22458 | 0.088542977 | -0.20724104  | 3.55159656  | 0.524624381 | 0.999351228 | NA |
| ASV_16s_22459 | 0.087276903 | -0.201351649 | 3.55161009  | 0.52034161  | 0.999368537 | NA |
| ASV_16s_22460 | 0.085757614 | -0.194158618 | 3.551626775 | 0.51528172  | 0.99938858  | NA |
| ASV_16s_22461 | 0.030626727 | -0.061389184 | 3.551901729 | 0.195274284 | 0.999976821 | NA |
| ASV_16s_22462 | 0.145336365 | -0.537111696 | 3.551093825 | 0.575024019 | NA          | NA |
| ASV_16s_22463 | 0.145336365 | -0.537111696 | 3.551093825 | 0.575024019 | NA          | NA |
| ASV_16s_22464 | 0.118058339 | -0.46648959  | 3.551280887 | 0.49412681  | 0.999467704 | NA |
| ASV_16s_22465 | 0.116883686 | -0.46313223  | 3.551290021 | 0.490963608 | 0.999478901 | NA |
| ASV_16s_22466 | 0.116883686 | -0.46313223  | 3.551290021 | 0.490963608 | 0.999478901 | NA |
| ASV_16s_22467 | 0.116883686 | -0.46313223  | 3.551290021 | 0.490963608 | 0.999478901 | NA |
| ASV_16s_22468 | 0.116883686 | -0.46313223  | 3.551290021 | 0.490963608 | 0.999478901 | NA |
| ASV_16s_22469 | 0.116883686 | -0.46313223  | 3.551290021 | 0.490963608 | 0.999478901 | NA |
| ASV_16s_22470 | 0.116883686 | -0.46313223  | 3.551290021 | 0.490963608 | 0.999478901 | NA |
| ASV_16s_22471 | 0.116883686 | -0.46313223  | 3.551290021 | 0.490963608 | 0.999478901 | NA |
| ASV_16s_22472 | 0.116883686 | -0.46313223  | 3.551290021 | 0.490963608 | 0.999478901 | NA |
| ASV_16s_22473 | 0.116883686 | -0.46313223  | 3.551290021 | 0.490963608 | 0.999478901 | NA |
| ASV_16s_22474 | 0.120540382 | -0.473641501 | 3.551261617 | 0.501118364 | 0.999442376 | NA |
| ASV_16s_22475 | 0.116335949 | -0.461513066 | 3.551294444 | 0.489436715 | 0.999484248 | NA |
| ASV_16s_22476 | 0.107147129 | -0.433606838 | 3.551372781 | 0.465136836 | 0.999564389 | NA |
| ASV_16s_22477 | 0.107147129 | -0.433606838 | 3.551372781 | 0.465136836 | 0.999564389 | NA |
| ASV_16s_22478 | 0.107147129 | -0.433606838 | 3.551372781 | 0.465136836 | 0.999564389 | NA |
| ASV_16s_22479 | 0.107147129 | -0.433606838 | 3.551372781 | 0.465136836 | 0.999564389 | NA |
| ASV_16s_22480 | 0.107900571 | -0.435942639 | 3.55136607  | 0.467026815 | 0.999558483 | NA |
| ASV_16s_22481 | 0.091109349 | -0.379275944 | 3.551520408 | 0.427021787 | 0.999672267 | NA |
| ASV_16s_22482 | 0.091109349 | -0.379275944 | 3.551520408 | 0.427021787 | 0.999672267 | NA |
| ASV_16s_22483 | 0.091109349 | -0.379275944 | 3.551520408 | 0.427021787 | 0.999672267 | NA |
| ASV_16s_22484 | 0.091109349 | -0.379275944 | 3.551520408 | 0.427021787 | 0.999672267 | NA |
| ASV_16s_22485 | 0.091109349 | -0.379275944 | 3.551520408 | 0.427021787 | 0.999672267 | NA |
| ASV_16s_22486 | 0.091109349 | -0.379275944 | 3.551520408 | 0.427021787 | 0.999672267 | NA |
| ASV_16s_22487 | 0.091109349 | -0.379275944 | 3.551520408 | 0.427021787 | 0.999672267 | NA |
| ASV_16s_22488 | 0.091109349 | -0.379275944 | 3.551520408 | 0.427021787 | 0.999672267 | NA |
| ASV_16s_22489 | 0.091109349 | -0.379275944 | 3.551520408 | 0.427021787 | 0.999672267 | NA |
| ASV_16s_22490 | 0.091109349 | -0.379275944 | 3.551520408 | 0.427021787 | 0.999672267 | NA |
| ASV_16s_22491 | 0.091109349 | -0.379275944 | 3.551520408 | 0.427021787 | 0.999672267 | NA |
| ASV_16s_22492 | 0.091109349 | -0.379275944 | 3.551520408 | 0.427021787 | 0.999672267 | NA |

|               |             |              |             |             |             |    |
|---------------|-------------|--------------|-------------|-------------|-------------|----|
| ASV_16s_22493 | 0.091109349 | -0.379275944 | 3.551520408 | 0.427021787 | 0.999672267 | NA |
| ASV_16s_22494 | 0.091109349 | -0.379275944 | 3.551520408 | 0.427021787 | 0.999672267 | NA |
| ASV_16s_22495 | 0.091109349 | -0.379275944 | 3.551520408 | 0.427021787 | 0.999672267 | NA |
| ASV_16s_22496 | 0.089083631 | -0.371673883 | 3.551539627 | 0.422643261 | 0.999683345 | NA |
| ASV_16s_22497 | 0.088830416 | -0.370677629 | 3.551541874 | 0.422100078 | 0.999684701 | NA |
| ASV_16s_22498 | 0.088830416 | -0.370677629 | 3.551541874 | 0.422100078 | 0.999684701 | NA |
| ASV_16s_22499 | 0.108065043 | -0.436417316 | 3.55136471  | 0.467400518 | 0.999557309 | NA |
| ASV_16s_22500 | 0.088070771 | -0.367745254 | 3.55154772  | 0.420481433 | 0.999688718 | NA |
| ASV_16s_22501 | 0.088070771 | -0.367745254 | 3.55154772  | 0.420481433 | 0.999688718 | NA |
| ASV_16s_22502 | 0.087817557 | -0.366771514 | 3.551549624 | 0.419942704 | 0.999690047 | NA |
| ASV_16s_22503 | 0.087564342 | -0.365798549 | 3.551551514 | 0.419404741 | 0.999691371 | NA |
| ASV_16s_22504 | 0.085791838 | -0.358919251 | 3.551564963 | 0.415693004 | 0.999700397 | NA |
| ASV_16s_22505 | 0.085791838 | -0.358919251 | 3.551564963 | 0.415693004 | 0.999700397 | NA |
| ASV_16s_22506 | 0.085791838 | -0.358919251 | 3.551564963 | 0.415693004 | 0.999700397 | NA |
| ASV_16s_22507 | 0.085791838 | -0.358919251 | 3.551564963 | 0.415693004 | 0.999700397 | NA |
| ASV_16s_22508 | 0.085791838 | -0.358919251 | 3.551564963 | 0.415693004 | 0.999700397 | NA |
| ASV_16s_22509 | 0.085791838 | -0.358919251 | 3.551564963 | 0.415693004 | 0.999700397 | NA |
| ASV_16s_22510 | 0.085791838 | -0.358919251 | 3.551564963 | 0.415693004 | 0.999700397 | NA |
| ASV_16s_22511 | 0.085791838 | -0.358919251 | 3.551564963 | 0.415693004 | 0.999700397 | NA |
| ASV_16s_22512 | 0.085791838 | -0.358919251 | 3.551564963 | 0.415693004 | 0.999700397 | NA |
| ASV_16s_22513 | 0.085791838 | -0.358919251 | 3.551564963 | 0.415693004 | 0.999700397 | NA |
| ASV_16s_22514 | 0.085791838 | -0.358919251 | 3.551564963 | 0.415693004 | 0.999700397 | NA |
| ASV_16s_22515 | 0.085791838 | -0.358919251 | 3.551564963 | 0.415693004 | 0.999700397 | NA |
| ASV_16s_22516 | 0.085791838 | -0.358919251 | 3.551564963 | 0.415693004 | 0.999700397 | NA |
| ASV_16s_22517 | 0.085791838 | -0.358919251 | 3.551564963 | 0.415693004 | 0.999700397 | NA |
| ASV_16s_22518 | 0.085791838 | -0.358919251 | 3.551564963 | 0.415693004 | 0.999700397 | NA |
| ASV_16s_22519 | 0.085791838 | -0.358919251 | 3.551564963 | 0.415693004 | 0.999700397 | NA |
| ASV_16s_22520 | 0.085791838 | -0.358919251 | 3.551564963 | 0.415693004 | 0.999700397 | NA |
| ASV_16s_22521 | 0.085791838 | -0.358919251 | 3.551564963 | 0.415693004 | 0.999700397 | NA |
| ASV_16s_22522 | 0.085791838 | -0.358919251 | 3.551564963 | 0.415693004 | 0.999700397 | NA |
| ASV_16s_22523 | 0.085791838 | -0.358919251 | 3.551564963 | 0.415693004 | 0.999700397 | NA |
| ASV_16s_22524 | 0.096477743 | -0.398591808 | 3.551472469 | 0.439082345 | 0.999640386 | NA |
| ASV_16s_22525 | 0.130672636 | -0.501222932 | 3.551189235 | 0.530367534 | NA          | NA |
| ASV_16s_22526 | 0.027333828 | -0.136582561 | 3.551300163 | 0.094212078 | 0.99999812  | NA |
| ASV_16s_22527 | 0.027333828 | -0.136582561 | 3.551300163 | 0.094212078 | 0.99999812  | NA |
| ASV_16s_22528 | 0.028821163 | 0.234554809  | 3.551406463 | 0.085542081 | 0.999998654 | NA |
| ASV_16s_22534 | 0.089018123 | 0.098566918  | 3.55177559  | 0.448249584 | 0.999614777 | NA |
| ASV_16s_22535 | 0.112920267 | -0.393010899 | 3.551534753 | 0.437628253 | 0.999644337 | NA |
| ASV_16s_22536 | 0.088804837 | -0.117962614 | 3.5517093   | 0.370173782 | 0.999796817 | NA |
| ASV_16s_22537 | 0.087459672 | -0.058970246 | 3.551842349 | 0.38743813  | 0.999763254 | NA |
| ASV_16s_22538 | 0.121542625 | -0.404285967 | 3.551444667 | 0.48670389  | 0.999493725 | NA |
| ASV_16s_22539 | 0.103137679 | -0.172770155 | 3.551500229 | 0.467373829 | 0.999557393 | NA |
| ASV_16s_22540 | 0.115467834 | -0.384036017 | 3.551486414 | 0.466091651 | 0.999561412 | NA |
| ASV_16s_22541 | 0.109536823 | -0.376160103 | 3.551529617 | 0.37335076  | 0.999790905 | NA |
| ASV_16s_22542 | 0.10718798  | -0.359484073 | 3.551488153 | 0.448139495 | 0.999615092 | NA |
| ASV_16s_22543 | 0.112025692 | 0.690441209  | 3.55194246  | 0.417510809 | 0.999695999 | NA |
| ASV_16s_22544 | 0.118912247 | -0.029981659 | 3.551353086 | 0.507306984 | 0.999419284 | NA |
| ASV_16s_22545 | 0.114225099 | -0.361614611 | 3.551388883 | 0.487312424 | 0.999491625 | NA |
| ASV_16s_22546 | 0.116326678 | -0.369351114 | 3.551367041 | 0.495301229 | 0.999463505 | NA |
| ASV_16s_22547 | 0.107343292 | -0.326760748 | 3.551451128 | 0.465116625 | 0.999564451 | NA |
| ASV_16s_22548 | 0.116226016 | -0.028945046 | 3.55159601  | 0.616559272 | 0.998897977 | NA |
| ASV_16s_22549 | 0.097078201 | 0.660834069  | 3.551816676 | 0.418218477 | 0.999694276 | NA |
| ASV_16s_22550 | 0.115531053 | 0.656950842  | 3.551765233 | 0.556017996 | 0.99921442  | NA |
| ASV_16s_22551 | 0.136313889 | -0.282400277 | 3.551757658 | 0.48041588  | 0.999515078 | NA |
| ASV_16s_22552 | 0.112842455 | -0.329555424 | 3.551382227 | 0.493951804 | 0.999468327 | NA |
| ASV_16s_22553 | 0.10592374  | 0.082385443  | 3.551414375 | 0.480369998 | 0.999515231 | NA |
| ASV_16s_22554 | 0.126073535 | 0.142293565  | 3.55142414  | 0.612550209 | 0.998921195 | NA |
| ASV_16s_22555 | 0.097359083 | 0.996213917  | 3.551035899 | 0.25001652  | 0.999946108 | NA |
| ASV_16s_22556 | 0.095672773 | 0.805171973  | 3.551827092 | 0.286495815 | 0.999914411 | NA |
| ASV_16s_22557 | 0.113713343 | -0.27904327  | 3.551351871 | 0.509014876 | 0.999412798 | NA |
| ASV_16s_22558 | 0.112492434 | -0.27867329  | 3.551364642 | 0.503772867 | 0.999432549 | NA |
| ASV_16s_22559 | 0.14368287  | -0.22442779  | 3.551811636 | 0.493943245 | 0.999468358 | NA |
| ASV_16s_22560 | 0.107230059 | -0.278603226 | 3.551367082 | 0.485156964 | 0.999499036 | NA |
| ASV_16s_22561 | 0.10344325  | -0.229975249 | 3.551644916 | 0.320369265 | 0.99987509  | NA |
| ASV_16s_22562 | 0.136676965 | -0.556884295 | 3.551260115 | 0.477225886 | 0.999525672 | NA |
| ASV_16s_22563 | 0.11740191  | 0.195811331  | 3.550433354 | 0.462953414 | 0.999571143 | NA |
| ASV_16s_22564 | 0.113794593 | -0.220204905 | 3.551354145 | 0.518207179 | 0.999377045 | NA |

|               |             |              |             |             |             |    |
|---------------|-------------|--------------|-------------|-------------|-------------|----|
| ASV_16s_22565 | 0.102202089 | 0.158204468  | 3.551357305 | 0.45426634  | 0.999597309 | NA |
| ASV_16s_22566 | 0.121458207 | 0.447732177  | 3.551816634 | 0.397061279 | 0.999742982 | NA |
| ASV_16s_22567 | 0.112986611 | -0.163169254 | 3.55134994  | 0.524066178 | 0.999353502 | NA |
| ASV_16s_22568 | 0.100931587 | 0.205811484  | 3.551326624 | 0.457167173 | 0.999588696 | NA |
| ASV_16s_22569 | 0.114123196 | 0.184228866  | 3.550379619 | 0.456321735 | 0.999591219 | NA |
| ASV_16s_22570 | 0.114123196 | 0.184228866  | 3.550379619 | 0.456321735 | 0.999591219 | NA |
| ASV_16s_22571 | 0.1722902   | -0.027976152 | 3.550758216 | 0.545401364 | 0.999262675 | NA |
| ASV_16s_22572 | 0.108375512 | -0.09040124  | 3.551723587 | 0.36670759  | 0.999803135 | NA |
| ASV_16s_22573 | 0.093271755 | -0.485099002 | 3.551384225 | 0.343751889 | 0.9998416   | NA |
| ASV_16s_22574 | 0.093603863 | -0.060763491 | 3.551673208 | 0.520412306 | 0.999368254 | NA |
| ASV_16s_22575 | 0.099749371 | 0.989809672  | 3.551846334 | 0.20042474  | 0.99997466  | NA |
| ASV_16s_22576 | 0.105866795 | 0.321333314  | 3.552024768 | 0.306107829 | 0.999892904 | NA |
| ASV_16s_22577 | 0.101485493 | 0.577603203  | 3.55147453  | 0.295366856 | 0.999905097 | NA |
| ASV_16s_22578 | 0.117165318 | -0.077301684 | 3.551148557 | 0.625709556 | 0.998843734 | NA |
| ASV_16s_22579 | 0.110722338 | -0.590200261 | 3.551292675 | 0.337793258 | 0.99985066  | NA |
| ASV_16s_22580 | 0.115800002 | 0.371286514  | 3.551225484 | 0.555127557 | 0.999218547 | NA |
| ASV_16s_22581 | 0.11663213  | 0.049876297  | 3.551256011 | 0.56174499  | 0.999187524 | NA |
| ASV_16s_22582 | 0.110636547 | 0.049874768  | 3.551249214 | 0.550290908 | 0.999240708 | NA |
| ASV_16s_22583 | 0.110679643 | 0.049876394  | 3.55125644  | 0.548638061 | 0.999248183 | NA |
| ASV_16s_22584 | 0.139618023 | -0.389863554 | 3.551273249 | 0.526651463 | 0.999342925 | NA |
| ASV_16s_22585 | 0.117446045 | 0.425755246  | 3.551202646 | 0.566804935 | 0.999163249 | NA |
| ASV_16s_22586 | 0.118887261 | -0.165815202 | 3.551582872 | 0.521570874 | 0.999363602 | NA |
| ASV_16s_22587 | 0.098582352 | 0.582796294  | 3.551312519 | 0.526474586 | 0.999343652 | NA |
| ASV_16s_22588 | 0.112544791 | 0.958393371  | 3.551614687 | 0.430486606 | 0.999663315 | NA |
| ASV_16s_22589 | 0.112544791 | 0.958393371  | 3.551614687 | 0.430486606 | 0.999663315 | NA |
| ASV_16s_22590 | 0.112544791 | 0.958393371  | 3.551614687 | 0.430486606 | 0.999663315 | NA |
| ASV_16s_22591 | 0.112544791 | 0.958393371  | 3.551614687 | 0.430486606 | 0.999663315 | NA |
| ASV_16s_22592 | 0.112544791 | 0.958393371  | 3.551614687 | 0.430486606 | 0.999663315 | NA |
| ASV_16s_22593 | 0.145248692 | 0.293798423  | 3.551792173 | 0.557289416 | NA          | NA |
| ASV_16s_22594 | 0.145248692 | 0.293798423  | 3.551792173 | 0.557289416 | NA          | NA |
| ASV_16s_22595 | 0.145248692 | 0.293798423  | 3.551792173 | 0.557289416 | NA          | NA |
| ASV_16s_22596 | 0.154396198 | 0.58553512   | 3.551874694 | 0.514671706 | 0.999390966 | NA |
| ASV_16s_22597 | 0.13862115  | 0.316601167  | 3.55200972  | 0.334950184 | 0.999854854 | NA |
| ASV_16s_22598 | 0.094979968 | 0.959026809  | 3.55161141  | 0.3975429   | 0.999741937 | NA |
| ASV_16s_22599 | 0.094979968 | 0.959026809  | 3.55161141  | 0.3975429   | 0.999741937 | NA |
| ASV_16s_22600 | 0.094979968 | 0.959026809  | 3.55161141  | 0.3975429   | 0.999741937 | NA |
| ASV_16s_22601 | 0.094979968 | 0.959026809  | 3.55161141  | 0.3975429   | 0.999741937 | NA |
| ASV_16s_22602 | 0.101776487 | 0.98324262   | 3.551558788 | 0.410757337 | 0.999712116 | NA |
| ASV_16s_22603 | 0.113915556 | 0.589058206  | 3.551884565 | 0.426171636 | 0.999674438 | NA |
| ASV_16s_22604 | 0.106873877 | 1.000375396  | 3.551522332 | 0.421252243 | 0.999686809 | NA |
| ASV_16s_22605 | 0.11668334  | 1.031298027  | 3.551459011 | 0.442773342 | 0.99963022  | NA |
| ASV_16s_22606 | 0.116830486 | 1.243124148  | 3.551454259 | 0.267053083 | 0.999362569 | NA |
| ASV_16s_22607 | 0.136393571 | 1.086136585  | 3.55133929  | 0.490425296 | 0.99948079  | NA |
| ASV_16s_22608 | 0.098056646 | 0.970173756  | 3.55158691  | 0.403397719 | 0.999729001 | NA |
| ASV_16s_22609 | 0.098056646 | 0.970173756  | 3.55158691  | 0.403397719 | 0.999729001 | NA |
| ASV_16s_22610 | 0.098056646 | 0.970173756  | 3.55158691  | 0.403397719 | 0.999729001 | NA |
| ASV_16s_22611 | 0.098056646 | 0.970173756  | 3.55158691  | 0.403397719 | 0.999729001 | NA |
| ASV_16s_22612 | 0.098056646 | 0.970173756  | 3.55158691  | 0.403397719 | 0.999729001 | NA |
| ASV_16s_22613 | 0.098056646 | 0.970173756  | 3.55158691  | 0.403397719 | 0.999729001 | NA |
| ASV_16s_22614 | 0.096770587 | 0.395301379  | 3.551383707 | 0.447450916 | 0.999617057 | NA |
| ASV_16s_22615 | 0.116174348 | 1.029739966  | 3.551462157 | 0.441597383 | 0.99963348  | NA |
| ASV_16s_22616 | 0.092964438 | 0.330538237  | 3.551987647 | 0.417379692 | 0.999696318 | NA |
| ASV_16s_22617 | 0.092964438 | 0.330538237  | 3.551987647 | 0.417379692 | 0.999696318 | NA |
| ASV_16s_22618 | 0.092964438 | 0.330538237  | 3.551987647 | 0.417379692 | 0.999696318 | NA |
| ASV_16s_22619 | 0.092964438 | 0.330538237  | 3.551987647 | 0.417379692 | 0.999696318 | NA |
| ASV_16s_22620 | 0.092964438 | 0.330538237  | 3.551987647 | 0.417379692 | 0.999696318 | NA |
| ASV_16s_22621 | 0.112544791 | 0.337381105  | 3.551939801 | 0.464683312 | 0.999565797 | NA |
| ASV_16s_22622 | 0.112544791 | 0.337381105  | 3.551939801 | 0.464683312 | 0.999565797 | NA |
| ASV_16s_22623 | 0.112544791 | 0.337381105  | 3.551939801 | 0.464683312 | 0.999565797 | NA |
| ASV_16s_22624 | 0.112544791 | 0.337381105  | 3.551939801 | 0.464683312 | 0.999565797 | NA |
| ASV_16s_22625 | 0.112544791 | 0.337381105  | 3.551939801 | 0.464683312 | 0.999565797 | NA |
| ASV_16s_22626 | 0.13613981  | -0.304665988 | 3.551558246 | 0.406370922 | 0.999722264 | NA |
| ASV_16s_22627 | 0.124479365 | 0.341455131  | 3.551901363 | 0.497073233 | 0.999457128 | NA |
| ASV_16s_22628 | 0.175759345 | 8.86E-05     | 3.550939664 | 0.949937516 | 0.995596199 | NA |
| ASV_16s_22629 | 0.124775861 | 0.963407828  | 3.551598352 | 0.347537456 | 0.999835651 | NA |
| ASV_16s_22630 | 0.072041887 | 0.325198227  | 3.552032604 | 0.358259501 | 0.999817964 | NA |
| ASV_16s_22631 | 0.072041887 | 0.325198227  | 3.552032604 | 0.358259501 | 0.999817964 | NA |

|               |             |              |             |             |             |    |
|---------------|-------------|--------------|-------------|-------------|-------------|----|
| ASV_16s_22632 | 0.072041887 | 0.325198227  | 3.552032604 | 0.358259501 | 0.999817964 | NA |
| ASV_16s_22633 | 0.095048795 | 0.331303373  | 3.55198207  | 0.414745327 | 0.999702672 | NA |
| ASV_16s_22634 | 0.097546322 | 0.332227584  | 3.551975412 | 0.427651002 | 0.999670654 | NA |
| ASV_16s_22635 | 0.097546322 | 0.332227584  | 3.551975412 | 0.427651002 | 0.999670654 | NA |
| ASV_16s_22636 | 0.098991427 | 0.327695927  | 3.552044109 | 0.343590149 | 0.999841851 | NA |
| ASV_16s_22637 | 0.104624826 | 0.045565338  | 3.551960622 | 0.321805386 | 0.99987319  | NA |
| ASV_16s_22638 | 0.100918234 | 0.329765961  | 3.552064882 | 0.323369468 | 0.999871097 | NA |
| ASV_16s_22639 | 0.121628742 | 0.346962811  | 3.551921632 | 0.258913113 | 0.999939302 | NA |
| ASV_16s_22640 | 0.115964166 | 0.338525093  | 3.551930321 | 0.473745234 | 0.99953705  | NA |
| ASV_16s_22641 | 0.110373864 | 0.346323748  | 3.551765567 | 0.308402044 | 0.999890166 | NA |
| ASV_16s_22642 | 0.120540382 | -0.440560588 | 3.55136791  | 0.491173316 | NA          | NA |
| ASV_16s_22643 | 0.120540382 | -0.440560588 | 3.55136791  | 0.491173316 | NA          | NA |
| ASV_16s_22644 | 0.170148816 | 0.201695196  | 3.55068851  | 0.903739237 | 0.996235592 | NA |
| ASV_16s_22645 | 0.071949041 | -0.287697969 | 3.551778096 | 0.364963301 | 0.999806263 | NA |
| ASV_16s_22646 | 0.071949041 | -0.287697969 | 3.551778096 | 0.364963301 | 0.999806263 | NA |
| ASV_16s_22647 | 0.071949041 | -0.287697969 | 3.551778096 | 0.364963301 | 0.999806263 | NA |
| ASV_16s_22648 | 0.071949041 | -0.287697969 | 3.551778096 | 0.364963301 | 0.999806263 | NA |
| ASV_16s_22649 | 0.071949041 | -0.287697969 | 3.551778096 | 0.364963301 | 0.999806263 | NA |
| ASV_16s_22650 | 0.071949041 | -0.287697969 | 3.551778096 | 0.364963301 | 0.999806263 | NA |
| ASV_16s_22651 | 0.105843679 | -0.402405758 | 3.551494304 | 0.453303835 | 0.999600139 | NA |
| ASV_16s_22652 | 0.105843679 | -0.402405758 | 3.551494304 | 0.453303835 | 0.999600139 | NA |
| ASV_16s_22653 | 0.105730701 | -0.244872702 | 3.551777601 | 0.321346492 | 0.999873799 | NA |
| ASV_16s_22654 | 0.129762624 | 1.06862255   | 3.551381547 | 0.47381111  | 0.999536837 | NA |
| ASV_16s_22655 | 0.113420275 | 1.248443493  | 3.551478551 | 0.24498316  | 0.999949713 | NA |
| ASV_16s_22656 | 0.110687613 | 1.205501399  | 3.551493784 | 0.259065667 | 0.99993918  | NA |
| ASV_16s_22657 | 0.106673566 | 1.04323724   | 3.551278313 | 0.363702035 | 0.999808503 | NA |
| ASV_16s_22658 | 0.106673566 | 1.04323724   | 3.551278313 | 0.363702035 | 0.999808503 | NA |
| ASV_16s_22659 | 0.068996826 | 0.907092672  | 3.551597602 | 0.263125979 | 0.999935879 | NA |
| ASV_16s_22660 | 0.068996826 | 0.907092672  | 3.551597602 | 0.263125979 | 0.999935879 | NA |
| ASV_16s_22661 | 0.095443692 | 1.006796785  | 3.551370597 | 0.342017408 | 0.999844276 | NA |
| ASV_16s_22662 | 0.095443692 | 1.006796785  | 3.551370597 | 0.342017408 | 0.999844276 | NA |
| ASV_16s_22663 | 0.095443692 | 1.006796785  | 3.551370597 | 0.342017408 | 0.999844276 | NA |
| ASV_16s_22664 | 0.095443692 | 1.006796785  | 3.551370597 | 0.342017408 | 0.999844276 | NA |
| ASV_16s_22665 | 0.095443692 | 1.006796785  | 3.551370597 | 0.342017408 | 0.999844276 | NA |
| ASV_16s_22666 | 0.131547102 | 1.112104177  | 3.551117946 | 0.420040708 | 0.999689806 | NA |
| ASV_16s_22667 | 0.131547102 | 1.112104177  | 3.551117946 | 0.420040708 | 0.999689806 | NA |
| ASV_16s_22668 | 0.11195658  | 0.351960699  | 3.551642504 | 0.401556603 | NA          | NA |
| ASV_16s_22669 | 0.11195658  | 0.351960699  | 3.551642504 | 0.401556603 | NA          | NA |
| ASV_16s_22670 | 0.11195658  | 0.351960699  | 3.551642504 | 0.401556603 | NA          | NA |
| ASV_16s_22671 | 0.140017326 | -0.130646578 | 3.550811907 | 0.71853563  | 0.998189229 | NA |
| ASV_16s_22672 | 0.120643312 | 0.356370924  | 3.551602829 | 0.424113345 | NA          | NA |
| ASV_16s_22673 | 0.120643312 | 0.356370924  | 3.551602829 | 0.424113345 | NA          | NA |
| ASV_16s_22674 | 0.120643312 | 0.356370924  | 3.551602829 | 0.424113345 | NA          | NA |
| ASV_16s_22675 | 0.120643312 | 0.356370924  | 3.551602829 | 0.424113345 | NA          | NA |
| ASV_16s_22676 | 0.120643312 | 0.356370924  | 3.551602829 | 0.424113345 | NA          | NA |
| ASV_16s_22677 | 0.109442147 | 0.35062605   | 3.551654858 | 0.395311754 | NA          | NA |
| ASV_16s_22678 | 0.109442147 | 0.35062605   | 3.551654858 | 0.395311754 | NA          | NA |
| ASV_16s_22679 | 0.109442147 | 0.35062605   | 3.551654858 | 0.395311754 | NA          | NA |
| ASV_16s_22680 | 0.109442147 | 0.35062605   | 3.551654858 | 0.395311754 | NA          | NA |
| ASV_16s_22681 | 0.109442147 | 0.35062605   | 3.551654858 | 0.395311754 | NA          | NA |
| ASV_16s_22682 | 0.109442147 | 0.35062605   | 3.551654858 | 0.395311754 | NA          | NA |
| ASV_16s_22683 | 0.099368984 | 0.346808594  | 3.551696748 | 0.371476943 | 0.999794406 | NA |
| ASV_16s_22684 | 0.099368984 | 0.346808594  | 3.551696748 | 0.371476943 | 0.999794406 | NA |
| ASV_16s_22685 | 0.099368984 | 0.346808594  | 3.551696748 | 0.371476943 | 0.999794406 | NA |
| ASV_16s_22686 | 0.075092907 | 0.24333788   | 3.551334654 | 0.116512071 | 0.999996079 | NA |
| ASV_16s_22687 | 0.082027924 | 0.343785355  | 3.551752759 | 0.33286865  | 0.999857873 | NA |
| ASV_16s_22688 | 0.082027924 | 0.343785355  | 3.551752759 | 0.33286865  | 0.999857873 | NA |
| ASV_16s_22689 | 0.140517584 | 0.365373022  | 3.551507802 | 0.48027305  | NA          | NA |
| ASV_16s_22690 | 0.088751305 | 0.345005815  | 3.551729499 | 0.348835524 | 0.999833575 | NA |
| ASV_16s_22691 | 0.088751305 | 0.345005815  | 3.551729499 | 0.348835524 | 0.999833575 | NA |
| ASV_16s_22692 | 0.088751305 | 0.345005815  | 3.551729499 | 0.348835524 | 0.999833575 | NA |
| ASV_16s_22693 | 0.088751305 | 0.345005815  | 3.551729499 | 0.348835524 | 0.999833575 | NA |
| ASV_16s_22694 | 0.088751305 | 0.345005815  | 3.551729499 | 0.348835524 | 0.999833575 | NA |
| ASV_16s_22695 | 0.171316381 | 0.378912744  | 3.551331808 | 0.57597401  | NA          | NA |
| ASV_16s_22696 | 0.124505908 | 0.358283851  | 3.551586156 | 0.434604904 | NA          | NA |
| ASV_16s_22697 | 0.049864184 | -0.211534645 | 3.551619986 | 0.22271002  | 0.999963666 | NA |
| ASV_16s_22698 | 0.049864184 | -0.211534645 | 3.551619986 | 0.22271002  | 0.999963666 | NA |



|               |             |              |             |             |             |    |
|---------------|-------------|--------------|-------------|-------------|-------------|----|
| ASV_16s_22699 | 0.122321085 | -0.460626557 | 3.551052809 | 0.430140472 | NA          | NA |
| ASV_16s_22700 | 0.122321085 | -0.460626557 | 3.551052809 | 0.430140472 | NA          | NA |
| ASV_16s_22701 | 0.122321085 | -0.460626557 | 3.551052809 | 0.430140472 | NA          | NA |
| ASV_16s_22702 | 0.122321085 | -0.460626557 | 3.551052809 | 0.430140472 | NA          | NA |
| ASV_16s_22703 | 0.157786689 | -0.5158535   | 3.550701733 | 0.533581311 | NA          | NA |
| ASV_16s_22704 | 0.11396338  | -0.390771658 | 3.551015776 | 0.292919809 | 0.999907733 | NA |
| ASV_16s_22705 | 0.150659821 | -0.507173131 | 3.550766644 | 0.511603209 | NA          | NA |
| ASV_16s_22706 | 0.150659821 | -0.507173131 | 3.550766644 | 0.511603209 | NA          | NA |
| ASV_16s_22707 | 0.060558908 | -0.264577283 | 3.551542131 | 0.262884995 | 0.999936078 | NA |
| ASV_16s_22708 | 0.060558908 | -0.264577283 | 3.551542131 | 0.262884995 | 0.999936078 | NA |
| ASV_16s_22709 | 0.055500936 | -0.240224674 | 3.551580641 | 0.244205509 | 0.999950255 | NA |
| ASV_16s_22710 | 0.055500936 | -0.240224674 | 3.551580641 | 0.244205509 | 0.999950255 | NA |
| ASV_16s_22711 | 0.055500936 | -0.240224674 | 3.551580641 | 0.244205509 | 0.999950255 | NA |
| ASV_16s_22712 | 0.099368984 | -0.408456195 | 3.551257483 | 0.373788158 | NA          | NA |
| ASV_16s_22713 | 0.099368984 | -0.408456195 | 3.551257483 | 0.373788158 | NA          | NA |
| ASV_16s_22714 | 0.124790901 | 1.094670791  | 3.551156415 | 0.403726517 | 0.999728261 | NA |
| ASV_16s_22715 | 0.109462846 | 1.051661018  | 3.551257487 | 0.369469679 | 0.999798112 | NA |
| ASV_16s_22716 | 0.108858086 | 1.049853251  | 3.551261936 | 0.368206719 | 0.999800419 | NA |
| ASV_16s_22717 | 0.099368984 | -0.077788703 | 3.551063508 | 0.600031887 | 0.998991572 | NA |
| ASV_16s_22718 | 0.099368984 | -0.077788703 | 3.551063508 | 0.600031887 | 0.998991572 | NA |
| ASV_16s_22719 | 0.099368984 | -0.077788703 | 3.551063508 | 0.600031887 | 0.998991572 | NA |
| ASV_16s_22720 | 0.099368984 | -0.077788703 | 3.551063508 | 0.600031887 | 0.998991572 | NA |
| ASV_16s_22721 | 0.099368984 | -0.077788703 | 3.551063508 | 0.600031887 | 0.998991572 | NA |
| ASV_16s_22722 | 0.099368984 | -0.077788703 | 3.551063508 | 0.600031887 | 0.998991572 | NA |
| ASV_16s_22723 | 0.099368984 | -0.077788703 | 3.551063508 | 0.600031887 | 0.998991572 | NA |
| ASV_16s_22724 | 0.099368984 | -0.077788703 | 3.551063508 | 0.600031887 | 0.998991572 | NA |
| ASV_16s_22725 | 0.099368984 | -0.077788703 | 3.551063508 | 0.600031887 | 0.998991572 | NA |
| ASV_16s_22726 | 0.084733063 | -0.077474428 | 3.551157404 | 0.549545792 | 0.999244084 | NA |
| ASV_16s_22727 | 0.084733063 | -0.077474428 | 3.551157404 | 0.549545792 | 0.999244084 | NA |
| ASV_16s_22728 | 0.084733063 | -0.077474428 | 3.551157404 | 0.549545792 | 0.999244084 | NA |
| ASV_16s_22729 | 0.084733063 | -0.077474428 | 3.551157404 | 0.549545792 | 0.999244084 | NA |
| ASV_16s_22730 | 0.084733063 | -0.077474428 | 3.551157404 | 0.549545792 | 0.999244084 | NA |
| ASV_16s_22731 | 0.084733063 | -0.077474428 | 3.551157404 | 0.549545792 | 0.999244084 | NA |
| ASV_16s_22732 | 0.084733063 | -0.077474428 | 3.551157404 | 0.549545792 | 0.999244084 | NA |
| ASV_16s_22733 | 0.084733063 | -0.077474428 | 3.551157404 | 0.549545792 | 0.999244084 | NA |
| ASV_16s_22734 | 0.084733063 | -0.077474428 | 3.551157404 | 0.549545792 | 0.999244084 | NA |
| ASV_16s_22735 | 0.084733063 | -0.077474428 | 3.551157404 | 0.549545792 | 0.999244084 | NA |
| ASV_16s_22736 | 0.084733063 | -0.077474428 | 3.551157404 | 0.549545792 | 0.999244084 | NA |
| ASV_16s_22737 | 0.084733063 | -0.077474428 | 3.551157404 | 0.549545792 | 0.999244084 | NA |
| ASV_16s_22738 | 0.084733063 | -0.077474428 | 3.551157404 | 0.549545792 | 0.999244084 | NA |
| ASV_16s_22739 | 0.084733063 | -0.077474428 | 3.551157404 | 0.549545792 | 0.999244084 | NA |
| ASV_16s_22740 | 0.084733063 | -0.077474428 | 3.551157404 | 0.549545792 | 0.999244084 | NA |
| ASV_16s_22741 | 0.084733063 | -0.077474428 | 3.551157404 | 0.549545792 | 0.999244084 | NA |
| ASV_16s_22742 | 0.060492676 | 0.220294159  | 3.551054273 | 0.273292452 | 0.999927068 | NA |
| ASV_16s_22743 | 0.060480679 | 0.220294359  | 3.551054369 | 0.273228227 | 0.999927126 | NA |
| ASV_16s_22744 | 0.060522668 | 0.220293943  | 3.551054038 | 0.273452202 | 0.999926923 | NA |
| ASV_16s_22745 | 0.063080836 | 0.220279735  | 3.551034821 | 0.286954498 | 0.999913945 | NA |
| ASV_16s_22746 | 0.063080836 | 0.220279735  | 3.551034821 | 0.286954498 | 0.999913945 | NA |
| ASV_16s_22747 | 0.063080836 | 0.220279735  | 3.551034821 | 0.286954498 | 0.999913945 | NA |
| ASV_16s_22748 | 0.107662057 | 0.310960336  | 3.551194323 | 0.612463533 | 0.998921693 | NA |
| ASV_16s_22749 | 0.107467329 | 0.310960406  | 3.551195412 | 0.611751982 | 0.998925778 | NA |
| ASV_16s_22750 | 0.097815179 | 0.310964222  | 3.551254759 | 0.577119325 | 0.999112258 | NA |
| ASV_16s_22751 | 0.109479407 | 0.310959695  | 3.551184348 | 0.619127215 | 0.998882931 | NA |
| ASV_16s_22752 | 0.093876428 | 0.310966     | 3.55128243  | 0.563402823 | 0.999179624 | NA |
| ASV_16s_22753 | 0.107321282 | 0.310960459  | 3.551196231 | 0.611218651 | 0.998928833 | NA |
| ASV_16s_22754 | 0.107321282 | 0.310960459  | 3.551196231 | 0.611218651 | 0.998928833 | NA |
| ASV_16s_22755 | 0.107321282 | 0.310960459  | 3.551196231 | 0.611218651 | 0.998928833 | NA |
| ASV_16s_22756 | 0.107321282 | 0.310960459  | 3.551196231 | 0.611218651 | 0.998928833 | NA |
| ASV_16s_22757 | 0.107321282 | 0.310960459  | 3.551196231 | 0.611218651 | 0.998928833 | NA |
| ASV_16s_22758 | 0.066450683 | 0.595406912  | 3.550962699 | 0.258004845 | 0.999940023 | NA |
| ASV_16s_22759 | 0.066450683 | 0.595406912  | 3.550962699 | 0.258004845 | 0.999940023 | NA |
| ASV_16s_22760 | 0.066450683 | 0.595406912  | 3.550962699 | 0.258004845 | 0.999940023 | NA |
| ASV_16s_22761 | 0.066450683 | 0.595406912  | 3.550962699 | 0.258004845 | 0.999940023 | NA |
| ASV_16s_22762 | 0.066450683 | 0.595406912  | 3.550962699 | 0.258004845 | 0.999940023 | NA |
| ASV_16s_22763 | 0.096292571 | 0.686739183  | 3.551241137 | 0.527109115 | 0.99934104  | NA |
| ASV_16s_22764 | 0.096292571 | 0.686739183  | 3.551241137 | 0.527109115 | 0.99934104  | NA |
| ASV_16s_22765 | 0.112286399 | 0.687039994  | 3.55114422  | 0.576169239 | 0.99911704  | NA |

|               |             |              |             |             |              |    |
|---------------|-------------|--------------|-------------|-------------|--------------|----|
| ASV_16s_22766 | 0.112286399 | 0.687039994  | 3.55114422  | 0.576169239 | 0.99911704   | NA |
| ASV_16s_22767 | 0.105059945 | -0.079175057 | 3.551215537 | 0.585972239 | 0.999066854  | NA |
| ASV_16s_22768 | 0.11077905  | 1.072868831  | 3.55166031  | 0.375179439 | 0.999787448  | NA |
| ASV_16s_22769 | 0.091184693 | 0.356586132  | 3.551871264 | 0.303071707 | 0.999896455  | NA |
| ASV_16s_22770 | 0.097757542 | -0.064154046 | 3.551281857 | 0.598616324 | 0.99899933   | NA |
| ASV_16s_22771 | 0.175129801 | 0.777894106  | 3.551783884 | 0.569770743 | 0.999148795  | NA |
| ASV_16s_22772 | 0.116174874 | 0.290566516  | 3.551182175 | 0.653080774 | 0.998670844  | NA |
| ASV_16s_22773 | 0.095359183 | -0.04942104  | 3.551453789 | 0.592160024 | 0.999034206  | NA |
| ASV_16s_22774 | 0.112282759 | 1.215136447  | 3.551674475 | 0.207266585 | 0.999971577  | NA |
| ASV_16s_22775 | 0.129429347 | 0.307715904  | 3.551804414 | 0.430313229 | 0.999663767  | NA |
| ASV_16s_22776 | 0.095941406 | 0.344869242  | 3.551919324 | 0.414335178 | 0.999703653  | NA |
| ASV_16s_22777 | 0.083590772 | 0.273327444  | 3.55182124  | 0.443448227 | 0.99962834   | NA |
| ASV_16s_22778 | 0.106543379 | 0.318208126  | 3.551827575 | 0.412244758 | 0.999708618  | NA |
| ASV_16s_22779 | 0.118448777 | 0.318208126  | 3.551827575 | 0.414861753 | 0.999702393  | NA |
| ASV_16s_22780 | 0.106871368 | 0.319799232  | 3.551759639 | 0.456475764 | 0.99959076   | NA |
| ASV_16s_22781 | 0.096146099 | 0.101963335  | 3.551693267 | 0.578436438 | 0.999105599  | NA |
| ASV_16s_22782 | 0.116912425 | 0.418348256  | 3.551172474 | 0.73960502  | 0.99801258   | NA |
| ASV_16s_22783 | 0.106328996 | 0.319958829  | 3.551666666 | 0.464653241 | 0.999565891  | NA |
| ASV_16s_22784 | 0.093263925 | -0.262916816 | 3.551442706 | 0.349547587 | 0.99983243   | NA |
| ASV_16s_22785 | 0.0942482   | 0.022066215  | 3.551555097 | 0.441040692 | 0.999635016  | NA |
| ASV_16s_22786 | 0.070009254 | 0.492990436  | 3.551783039 | 0.426596931 | 0.999673353  | NA |
| ASV_16s_22787 | 0.083151033 | 0.084024069  | 3.551350105 | 0.502875907 | 0.999435883  | NA |
| ASV_16s_22788 | 0.140559705 | -0.067435442 | 3.551089845 | 0.698059334 | 0.998350604  | NA |
| ASV_16s_22789 | 0.158330325 | -0.563755101 | 3.55100752  | 0.616464866 | NA           | NA |
| ASV_16s_22790 | 0.140517584 | 1.026001298  | 3.551422942 | 0.496656993 | 0.99945863   | NA |
| ASV_16s_22791 | 0.108625881 | 0.879825994  | 3.551569189 | 0.405950707 | 0.999723223  | NA |
| ASV_16s_22792 | 0.074719142 | 0.287239699  | 3.551831098 | 0.369475229 | 0.999798101  | NA |
| ASV_16s_22793 | 0.074719142 | 0.287239699  | 3.551831098 | 0.369475229 | 0.999798101  | NA |
| ASV_16s_22794 | 0.168461055 | 0.279393115  | 3.551614007 | 0.645109658 | 0.998722864  | NA |
| ASV_16s_22795 | 0.042420448 | 0.296088241  | 3.551925198 | 0.238691452 | 0.999953978  | NA |
| ASV_16s_22796 | 0.059483602 | 0.290885512  | 3.551884904 | 0.312182995 | 0.999885547  | NA |
| ASV_16s_22797 | 0.140517584 | -0.437385876 | 3.551381049 | 0.548137869 | 0.999250435  | NA |
| ASV_16s_22798 | 0.148615668 | 1.041309505  | 3.551557601 | 0.421008206 | 0.999687415  | NA |
| ASV_16s_22799 | 0.193540942 | -0.540622396 | 3.550704435 | 0.718334852 | NA           | NA |
| ASV_16s_22800 | 0.196739187 | -0.288531543 | 3.550844053 | 0.769814941 | 0.9997739938 | NA |
| ASV_16s_22801 | 0.144515736 | 0.612618927  | 3.550809172 | 0.391667574 | 0.999754485  | NA |
| ASV_16s_22802 | 0.118890576 | 0.321593074  | 3.551546589 | 0.426449947 | 0.999673729  | NA |
| ASV_16s_22803 | 0.107525436 | -0.349968682 | 3.551305075 | 0.41801008  | 0.999694784  | NA |
| ASV_16s_22804 | 0.124790901 | 1.094670791  | 3.551156415 | 0.403726517 | 0.999728261  | NA |
| ASV_16s_22805 | 0.124790901 | 1.094670791  | 3.551156415 | 0.403726517 | 0.999728261  | NA |
| ASV_16s_22806 | 0.124790901 | 1.094670791  | 3.551156415 | 0.403726517 | 0.999728261  | NA |
| ASV_16s_22807 | 0.151484628 | 0.983934663  | 3.550966446 | 0.629467433 | 0.998820948  | NA |
| ASV_16s_22808 | 0.105421822 | 0.575514152  | 3.551422912 | 0.498863211 | 0.999450633  | NA |
| ASV_16s_22809 | 0.071109923 | -0.077068563 | 3.551279111 | 0.485127235 | 0.999499138  | NA |
| ASV_16s_22810 | 0.071109923 | -0.077068563 | 3.551279111 | 0.485127235 | 0.999499138  | NA |
| ASV_16s_22811 | 0.071109923 | -0.077068563 | 3.551279111 | 0.485127235 | 0.999499138  | NA |
| ASV_16s_22812 | 0.071109923 | -0.077068563 | 3.551279111 | 0.485127235 | 0.999499138  | NA |
| ASV_16s_22813 | 0.196780568 | -0.028746003 | 3.550932504 | 1.050223946 | 0.993977162  | NA |
| ASV_16s_22814 | 0.158082765 | -0.028433137 | 3.551032985 | 0.886979322 | 0.9964517    | NA |
| ASV_16s_22815 | 0.169155558 | 0.387519425  | 3.551045628 | 1.202451359 | 0.990870346  | NA |
| ASV_16s_22816 | 0.156115234 | 0.324665451  | 3.551069483 | 1.150995303 | 0.992011802  | NA |
| ASV_16s_22817 | 0.156964634 | -0.028422538 | 3.551036511 | 0.882785744 | 0.99650448   | NA |
| ASV_16s_22818 | 0.156964634 | -0.028422538 | 3.551036511 | 0.882785744 | 0.99650448   | NA |
| ASV_16s_22819 | 0.156964634 | -0.028422538 | 3.551036511 | 0.882785744 | 0.99650448   | NA |
| ASV_16s_22820 | 0.122902945 | -0.028005622 | 3.551178401 | 0.74669695  | 0.997950649  | NA |
| ASV_16s_22821 | 0.093819576 | -0.021636145 | 3.551366516 | 0.638758178 | 0.998763324  | NA |
| ASV_16s_22822 | 0.093819576 | -0.021636145 | 3.551366516 | 0.638758178 | 0.998763324  | NA |
| ASV_16s_22823 | 0.107200805 | -0.07271837  | 3.551074426 | 0.65257781  | 0.998674168  | NA |
| ASV_16s_22824 | 0.107200805 | -0.07271837  | 3.551074426 | 0.65257781  | 0.998674168  | NA |
| ASV_16s_22825 | 0.115284855 | 0.237158537  | 3.551099898 | 0.67706384  | 0.998505827  | NA |
| ASV_16s_22826 | 0.076888305 | -0.070183383 | 3.551289274 | 0.537506956 | 0.999297228  | NA |
| ASV_16s_22827 | 0.076888305 | -0.070183383 | 3.551289274 | 0.537506956 | 0.999297228  | NA |
| ASV_16s_22828 | 0.076888305 | -0.070183383 | 3.551289274 | 0.537506956 | 0.999297228  | NA |
| ASV_16s_22829 | 0.076888305 | -0.070183383 | 3.551289274 | 0.537506956 | 0.999297228  | NA |
| ASV_16s_22830 | 0.076888305 | -0.070183383 | 3.551289274 | 0.537506956 | 0.999297228  | NA |
| ASV_16s_22831 | 0.076888305 | -0.070183383 | 3.551289274 | 0.537506956 | 0.999297228  | NA |
| ASV_16s_22832 | 0.076888305 | -0.070183383 | 3.551289274 | 0.537506956 | 0.999297228  | NA |

|               |             |              |             |             |             |    |
|---------------|-------------|--------------|-------------|-------------|-------------|----|
| ASV_16s_22833 | 0.129762624 | -0.07304933  | 3.550977626 | 0.738507219 | 0.998022054 | NA |
| ASV_16s_22834 | 0.129762624 | -0.07304933  | 3.550977626 | 0.738507219 | 0.998022054 | NA |
| ASV_16s_22835 | 0.129762624 | -0.07304933  | 3.550977626 | 0.738507219 | 0.998022054 | NA |
| ASV_16s_22836 | 0.129762624 | -0.07304933  | 3.550977626 | 0.738507219 | 0.998022054 | NA |
| ASV_16s_22837 | 0.130567544 | 0.286332687  | 3.551005897 | 0.752763772 | 0.997896668 | NA |
| ASV_16s_22838 | 0.130648036 | 0.302648968  | 3.551021198 | 0.748884716 | 0.99793129  | NA |
| ASV_16s_22839 | 0.095399993 | -0.072477051 | 3.551143103 | 0.610091497 | 0.99893527  | NA |
| ASV_16s_22840 | 0.095399993 | -0.072477051 | 3.551143103 | 0.610091497 | 0.99893527  | NA |
| ASV_16s_22841 | 0.107022098 | 0.359214086  | 3.551528207 | 0.671567739 | 0.998544786 | NA |
| ASV_16s_22842 | 0.107022098 | 0.359214086  | 3.551528207 | 0.671567739 | 0.998544786 | NA |
| ASV_16s_22843 | 0.107022098 | 0.359214086  | 3.551528207 | 0.671567739 | 0.998544786 | NA |
| ASV_16s_22844 | 0.107022098 | 0.359214086  | 3.551528207 | 0.671567739 | 0.998544786 | NA |
| ASV_16s_22845 | 0.107022098 | 0.359214086  | 3.551528207 | 0.671567739 | 0.998544786 | NA |
| ASV_16s_22846 | 0.101920022 | 0.331817754  | 3.551788516 | 0.477445382 | 0.999524948 | NA |
| ASV_16s_22847 | 0.175745477 | 0.36029806   | 3.551171634 | 0.943659556 | 0.995686916 | NA |
| ASV_16s_22848 | 0.139502895 | 0.344805784  | 3.551765482 | 0.585801396 | 0.999067744 | NA |
| ASV_16s_22849 | 0.144390071 | 0.320430993  | 3.551181018 | 0.67595269  | 0.998513759 | NA |
| ASV_16s_22850 | 0.176791885 | 0.355400046  | 3.551593481 | 0.719197754 | 0.998183842 | NA |
| ASV_16s_22851 | 0.117773158 | 0.36021253   | 3.551452648 | 0.711238729 | 0.998247885 | NA |
| ASV_16s_22852 | 0.095138948 | 0.356005685  | 3.551609284 | 0.628846629 | 0.998824732 | NA |
| ASV_16s_22853 | 0.095138948 | 0.356005685  | 3.551609284 | 0.628846629 | 0.998824732 | NA |
| ASV_16s_22854 | 0.095138948 | 0.356005685  | 3.551609284 | 0.628846629 | 0.998824732 | NA |
| ASV_16s_22855 | 0.095138948 | 0.356005685  | 3.551609284 | 0.628846629 | 0.998824732 | NA |
| ASV_16s_22856 | 0.095138948 | 0.356005685  | 3.551609284 | 0.628846629 | 0.998824732 | NA |
| ASV_16s_22857 | 0.095138948 | 0.356005685  | 3.551609284 | 0.628846629 | 0.998824732 | NA |
| ASV_16s_22858 | 0.095138948 | 0.356005685  | 3.551609284 | 0.628846629 | 0.998824732 | NA |
| ASV_16s_22859 | 0.095138948 | 0.356005685  | 3.551609284 | 0.628846629 | 0.998824732 | NA |
| ASV_16s_22860 | 0.095138948 | 0.356005685  | 3.551609284 | 0.628846629 | 0.998824732 | NA |
| ASV_16s_22861 | 0.095138948 | 0.356005685  | 3.551609284 | 0.628846629 | 0.998824732 | NA |
| ASV_16s_22862 | 0.095138948 | 0.356005685  | 3.551609284 | 0.628846629 | 0.998824732 | NA |
| ASV_16s_22863 | 0.095138948 | 0.356005685  | 3.551609284 | 0.628846629 | 0.998824732 | NA |
| ASV_16s_22864 | 0.095138948 | 0.356005685  | 3.551609284 | 0.628846629 | 0.998824732 | NA |
| ASV_16s_22865 | 0.095138948 | 0.356005685  | 3.551609284 | 0.628846629 | 0.998824732 | NA |
| ASV_16s_22866 | 0.095138948 | 0.356005685  | 3.551609284 | 0.628846629 | 0.998824732 | NA |
| ASV_16s_22867 | 0.095138948 | 0.356005685  | 3.551609284 | 0.628846629 | 0.998824732 | NA |
| ASV_16s_22868 | 0.095138948 | 0.356005685  | 3.551609284 | 0.628846629 | 0.998824732 | NA |
| ASV_16s_22869 | 0.095138948 | 0.356005685  | 3.551609284 | 0.628846629 | 0.998824732 | NA |
| ASV_16s_22870 | 0.095138948 | 0.356005685  | 3.551609284 | 0.628846629 | 0.998824732 | NA |
| ASV_16s_22871 | 0.095138948 | 0.356005685  | 3.551609284 | 0.628846629 | 0.998824732 | NA |
| ASV_16s_22872 | 0.095138948 | 0.356005685  | 3.551609284 | 0.628846629 | 0.998824732 | NA |
| ASV_16s_22873 | 0.095138948 | 0.356005685  | 3.551609284 | 0.628846629 | 0.998824732 | NA |
| ASV_16s_22874 | 0.095138948 | 0.356005685  | 3.551609284 | 0.628846629 | 0.998824732 | NA |
| ASV_16s_22875 | 0.114160571 | 0.566214435  | 3.551394444 | 0.877776214 | 0.996566856 | NA |
| ASV_16s_22876 | 0.174358685 | 0.360296656  | 3.55117619  | 0.937876866 | 0.9957694   | NA |
| ASV_16s_22877 | 0.123271019 | 0.315940134  | 3.551168032 | 0.693709408 | 0.998383605 | NA |
| ASV_16s_22878 | 0.123271019 | 0.315940134  | 3.551168032 | 0.693709408 | 0.998383605 | NA |
| ASV_16s_22879 | 0.123271019 | 0.315940134  | 3.551168032 | 0.693709408 | 0.998383605 | NA |
| ASV_16s_22880 | 0.106198137 | 0.315940261  | 3.551260434 | 0.629858539 | 0.998818559 | NA |
| ASV_16s_22881 | 0.109277898 | 0.315940121  | 3.551241648 | 0.641129733 | 0.998748319 | NA |
| ASV_16s_22882 | 0.106198137 | 0.315940261  | 3.551260434 | 0.629858539 | 0.998818559 | NA |
| ASV_16s_22883 | 0.106555092 | 0.315940258  | 3.551258178 | 0.63119087  | 0.998810397 | NA |
| ASV_16s_22884 | 0.106555092 | 0.315940258  | 3.551258178 | 0.63119087  | 0.998810397 | NA |
| ASV_16s_22885 | 0.106555092 | 0.315940258  | 3.551258178 | 0.63119087  | 0.998810397 | NA |
| ASV_16s_22886 | 0.106555092 | 0.315940258  | 3.551258178 | 0.63119087  | 0.998810397 | NA |
| ASV_16s_22887 | 0.106555092 | 0.315940258  | 3.551258178 | 0.63119087  | 0.998810397 | NA |
| ASV_16s_22888 | 0.106555092 | 0.315940258  | 3.551258178 | 0.63119087  | 0.998810397 | NA |
| ASV_16s_22889 | 0.114223775 | 0.315940196  | 3.551213677 | 0.659325082 | 0.998629118 | NA |
| ASV_16s_22890 | 0.120572087 | 0.315940151  | 3.551181004 | 0.683230649 | 0.998461293 | NA |
| ASV_16s_22891 | 0.103133136 | 0.31594029   | 3.551280198 | 0.618802091 | 0.998884843 | NA |
| ASV_16s_22892 | 0.102790941 | 0.48977727   | 3.551207062 | 0.784698271 | 0.997596994 | NA |
| ASV_16s_22893 | 0.102448745 | 0.315940296  | 3.551284776 | 0.616344326 | 0.998899231 | NA |
| ASV_16s_22894 | 0.102448745 | 0.315940296  | 3.551284776 | 0.616344326 | 0.998899231 | NA |
| ASV_16s_22895 | 0.102106549 | 0.3159403    | 3.551287088 | 0.615118013 | 0.998906362 | NA |
| ASV_16s_22896 | 0.101764354 | 0.315940303  | 3.551289415 | 0.613893429 | 0.998913453 | NA |
| ASV_16s_22897 | 0.101764354 | 0.315940303  | 3.551289415 | 0.613893429 | 0.998913453 | NA |
| ASV_16s_22898 | 0.165426471 | 0.315939955  | 3.55102104  | 0.86196794  | 0.996758927 | NA |
| ASV_16s_22899 | 0.127679336 | 0.315940108  | 3.551148291 | 0.710367483 | 0.998254804 | NA |

|               |             |             |             |             |             |    |
|---------------|-------------|-------------|-------------|-------------|-------------|----|
| ASV_16s_22900 | 0.118242552 | 0.315940167 | 3.551192636 | 0.674326118 | 0.99852532  | NA |
| ASV_16s_22901 | 0.144332717 | 0.315939918 | 3.551084079 | 0.775776661 | 0.997683373 | NA |
| ASV_16s_22902 | 0.099368984 | 0.3159404   | 3.551306148 | 0.605370722 | 0.998961948 | NA |
| ASV_16s_22903 | 0.099368984 | 0.3159404   | 3.551306148 | 0.605370722 | 0.998961948 | NA |
| ASV_16s_22904 | 0.099368984 | 0.3159404   | 3.551306148 | 0.605370722 | 0.998961948 | NA |
| ASV_16s_22905 | 0.099368984 | 0.3159404   | 3.551306148 | 0.605370722 | 0.998961948 | NA |
| ASV_16s_22906 | 0.099368984 | 0.3159404   | 3.551306148 | 0.605370722 | 0.998961948 | NA |
| ASV_16s_22907 | 0.099368984 | 0.3159404   | 3.551306148 | 0.605370722 | 0.998961948 | NA |
| ASV_16s_22908 | 0.099368984 | 0.3159404   | 3.551306148 | 0.605370722 | 0.998961948 | NA |
| ASV_16s_22909 | 0.099368984 | 0.3159404   | 3.551306148 | 0.605370722 | 0.998961948 | NA |
| ASV_16s_22910 | 0.099368984 | 0.3159404   | 3.551306148 | 0.605370722 | 0.998961948 | NA |
| ASV_16s_22911 | 0.099368984 | 0.3159404   | 3.551306148 | 0.605370722 | 0.998961948 | NA |
| ASV_16s_22912 | 0.099368984 | 0.3159404   | 3.551306148 | 0.605370722 | 0.998961948 | NA |
| ASV_16s_22913 | 0.099368984 | 0.3159404   | 3.551306148 | 0.605370722 | 0.998961948 | NA |
| ASV_16s_22914 | 0.099368984 | 0.3159404   | 3.551306148 | 0.605370722 | 0.998961948 | NA |
| ASV_16s_22915 | 0.116075133 | 0.315940182 | 3.551203885 | 0.66607834  | 0.998583015 | NA |
| ASV_16s_22916 | 0.105894606 | 0.432586936 | 3.551195815 | 0.781132026 | 0.997631773 | NA |
| ASV_16s_22917 | 0.133795478 | 0.595932564 | 3.550755627 | 0.503592531 | 0.99943322  | NA |
| ASV_16s_22918 | 0.133795478 | 0.595932564 | 3.550755627 | 0.503592531 | 0.99943322  | NA |
| ASV_16s_22919 | 0.133795478 | 0.595932564 | 3.550755627 | 0.503592531 | 0.99943322  | NA |
| ASV_16s_22920 | 0.094632764 | 0.686702118 | 3.551253051 | 0.522000667 | 0.99936187  | NA |
| ASV_16s_22921 | 0.094632764 | 0.686702118 | 3.551253051 | 0.522000667 | 0.99936187  | NA |
| ASV_16s_22922 | 0.094632764 | 0.686702118 | 3.551253051 | 0.522000667 | 0.99936187  | NA |
| ASV_16s_22923 | 0.094632764 | 0.686702118 | 3.551253051 | 0.522000667 | 0.99936187  | NA |
| ASV_16s_22924 | 0.094632764 | 0.686702118 | 3.551253051 | 0.522000667 | 0.99936187  | NA |
| ASV_16s_22925 | 0.170960706 | 0.687669585 | 3.550943014 | 0.777244209 | 0.997669307 | NA |
| ASV_16s_22926 | 0.15026617  | 1.049747564 | 3.551213233 | 0.545697563 | 0.999261357 | NA |
| ASV_16s_22927 | 0.210331728 | 0.733844156 | 3.551087082 | 0.988084678 | 0.995018464 | NA |
| ASV_16s_22928 | 0.155343053 | 0.733229484 | 3.551266157 | 0.786548233 | 0.997578821 | NA |
| ASV_16s_22929 | 0.155343053 | 0.733229484 | 3.551266157 | 0.786548233 | 0.997578821 | NA |
| ASV_16s_22930 | 0.142720427 | 1.01053289  | 3.551421705 | 0.562567275 | 0.999183612 | NA |
| ASV_16s_22931 | 0.155343053 | 0.733229484 | 3.551266157 | 0.786548233 | 0.997578821 | NA |
| ASV_16s_22932 | 0.155343053 | 0.733229484 | 3.551266157 | 0.786548233 | 0.997578821 | NA |
| ASV_16s_22933 | 0.155343053 | 0.733229484 | 3.551266157 | 0.786548233 | 0.997578821 | NA |
| ASV_16s_22934 | 0.131452956 | 0.72940351  | 3.551381712 | 0.703590347 | 0.998307998 | NA |
| ASV_16s_22935 | 0.131452956 | 0.72940351  | 3.551381712 | 0.703590347 | 0.998307998 | NA |
| ASV_16s_22936 | 0.128151988 | 0.990277482 | 3.551405392 | 0.508506136 | 0.999414735 | NA |
| ASV_16s_22937 | 0.131452956 | 0.72940351  | 3.551381712 | 0.703590347 | 0.998307998 | NA |
| ASV_16s_22938 | 0.131452956 | 0.72940351  | 3.551381712 | 0.703590347 | 0.998307998 | NA |
| ASV_16s_22939 | 0.131452956 | 0.72940351  | 3.551381712 | 0.703590347 | 0.998307998 | NA |
| ASV_16s_22940 | 0.131452956 | 0.72940351  | 3.551381712 | 0.703590347 | 0.998307998 | NA |
| ASV_16s_22941 | 0.131452956 | 0.72940351  | 3.551381712 | 0.703590347 | 0.998307998 | NA |
| ASV_16s_22942 | 0.131452956 | 0.72940351  | 3.551381712 | 0.703590347 | 0.998307998 | NA |
| ASV_16s_22943 | 0.131452956 | 0.72940351  | 3.551381712 | 0.703590347 | 0.998307998 | NA |
| ASV_16s_22944 | 0.131452956 | 0.72940351  | 3.551381712 | 0.703590347 | 0.998307998 | NA |
| ASV_16s_22945 | 0.131452956 | 0.72940351  | 3.551381712 | 0.703590347 | 0.998307998 | NA |
| ASV_16s_22946 | 0.131452956 | 0.72940351  | 3.551381712 | 0.703590347 | 0.998307998 | NA |
| ASV_16s_22947 | 0.131452956 | 0.72940351  | 3.551381712 | 0.703590347 | 0.998307998 | NA |
| ASV_16s_22948 | 0.131452956 | 0.72940351  | 3.551381712 | 0.703590347 | 0.998307998 | NA |
| ASV_16s_22949 | 0.131452956 | 0.72940351  | 3.551381712 | 0.703590347 | 0.998307998 | NA |
| ASV_16s_22950 | 0.131452956 | 0.72940351  | 3.551381712 | 0.703590347 | 0.998307998 | NA |
| ASV_16s_22951 | 0.131452956 | 0.72940351  | 3.551381712 | 0.703590347 | 0.998307998 | NA |
| ASV_16s_22952 | 0.131452956 | 0.72940351  | 3.551381712 | 0.703590347 | 0.998307998 | NA |
| ASV_16s_22953 | 0.131452956 | 0.72940351  | 3.551381712 | 0.703590347 | 0.998307998 | NA |
| ASV_16s_22954 | 0.131452956 | 0.72940351  | 3.551381712 | 0.703590347 | 0.998307998 | NA |
| ASV_16s_22955 | 0.131452956 | 0.72940351  | 3.551381712 | 0.703590347 | 0.998307998 | NA |
| ASV_16s_22956 | 0.131452956 | 0.72940351  | 3.551381712 | 0.703590347 | 0.998307998 | NA |
| ASV_16s_22957 | 0.065115966 | 0.654631063 | 3.551757068 | 0.451808933 | 0.999604507 | NA |
| ASV_16s_22958 | 0.065115966 | 0.654631063 | 3.551757068 | 0.451808933 | 0.999604507 | NA |
| ASV_16s_22959 | 0.065115966 | 0.654631063 | 3.551757068 | 0.451808933 | 0.999604507 | NA |
| ASV_16s_22960 | 0.065115966 | 0.654631063 | 3.551757068 | 0.451808933 | 0.999604507 | NA |
| ASV_16s_22961 | 0.065115966 | 0.654631063 | 3.551757068 | 0.451808933 | 0.999604507 | NA |
| ASV_16s_22962 | 0.065115966 | 0.654631063 | 3.551757068 | 0.451808933 | 0.999604507 | NA |
| ASV_16s_22963 | 0.065115966 | 0.654631063 | 3.551757068 | 0.451808933 | 0.999604507 | NA |
| ASV_16s_22964 | 0.065115966 | 0.654631063 | 3.551757068 | 0.451808933 | 0.999604507 | NA |
| ASV_16s_22965 | 0.065115966 | 0.654631063 | 3.551757068 | 0.451808933 | 0.999604507 | NA |
| ASV_16s_22966 | 0.065115966 | 0.654631063 | 3.551757068 | 0.451808933 | 0.999604507 | NA |

|               |             |             |             |             |                |
|---------------|-------------|-------------|-------------|-------------|----------------|
| ASV_16s_22967 | 0.065115966 | 0.654631063 | 3.551757068 | 0.451808933 | 0.999604507 NA |
| ASV_16s_22968 | 0.065115966 | 0.654631063 | 3.551757068 | 0.451808933 | 0.999604507 NA |
| ASV_16s_22969 | 0.065115966 | 0.654631063 | 3.551757068 | 0.451808933 | 0.999604507 NA |
| ASV_16s_22970 | 0.12220866  | 0.692118782 | 3.55115706  | 0.632767429 | 0.998800691 NA |
| ASV_16s_22971 | 0.12220866  | 0.692118782 | 3.55115706  | 0.632767429 | 0.998800691 NA |
| ASV_16s_22972 | 0.12220866  | 0.692118782 | 3.55115706  | 0.632767429 | 0.998800691 NA |
| ASV_16s_22973 | 0.12220866  | 0.692118782 | 3.55115706  | 0.632767429 | 0.998800691 NA |
| ASV_16s_22974 | 0.12220866  | 0.692118782 | 3.55115706  | 0.632767429 | 0.998800691 NA |
| ASV_16s_22975 | 0.114595435 | 0.691983148 | 3.551196836 | 0.608067348 | 0.998946764 NA |
| ASV_16s_22976 | 0.133527531 | 0.692290003 | 3.551106272 | 0.670454739 | 0.998552592 NA |
| ASV_16s_22977 | 0.129825603 | 0.692234177 | 3.551121917 | 0.658000964 | 0.998638038 NA |
| ASV_16s_22978 | 0.124685519 | 0.692158218 | 3.551145162 | 0.64092094  | 0.998749645 NA |
| ASV_16s_22979 | 0.12109246  | 0.692095427 | 3.551162589 | 0.629093643 | 0.998823227 NA |
| ASV_16s_22980 | 0.131416252 | 0.692257373 | 3.551115125 | 0.66326546  | 0.998602342 NA |
| ASV_16s_22981 | 0.125676263 | 0.692173904 | 3.551140532 | 0.644199512 | 0.998728715 NA |
| ASV_16s_22982 | 0.125676263 | 0.692173904 | 3.551140532 | 0.644199512 | 0.998728715 NA |
| ASV_16s_22983 | 0.125676263 | 0.692173904 | 3.551140532 | 0.644199512 | 0.998728715 NA |
| ASV_16s_22984 | 0.125676263 | 0.692173904 | 3.551140532 | 0.644199512 | 0.998728715 NA |
| ASV_16s_22985 | 0.125676263 | 0.692173904 | 3.551140532 | 0.644199512 | 0.998728715 NA |
| ASV_16s_22986 | 0.125676263 | 0.692173904 | 3.551140532 | 0.644199512 | 0.998728715 NA |
| ASV_16s_22987 | 0.125676263 | 0.692173904 | 3.551140532 | 0.644199512 | 0.998728715 NA |
| ASV_16s_22988 | 0.125676263 | 0.692173904 | 3.551140532 | 0.644199512 | 0.998728715 NA |
| ASV_16s_22989 | 0.125676263 | 0.692173904 | 3.551140532 | 0.644199512 | 0.998728715 NA |
| ASV_16s_22990 | 0.125676263 | 0.692173904 | 3.551140532 | 0.644199512 | 0.998728715 NA |
| ASV_16s_22991 | 0.125676263 | 0.692173904 | 3.551140532 | 0.644199512 | 0.998728715 NA |
| ASV_16s_22992 | 0.125676263 | 0.692173904 | 3.551140532 | 0.644199512 | 0.998728715 NA |
| ASV_16s_22993 | 0.125676263 | 0.692173904 | 3.551140532 | 0.644199512 | 0.998728715 NA |
| ASV_16s_22994 | 0.125676263 | 0.692173904 | 3.551140532 | 0.644199512 | 0.998728715 NA |
| ASV_16s_22995 | 0.125676263 | 0.692173904 | 3.551140532 | 0.644199512 | 0.998728715 NA |
| ASV_16s_22996 | 0.110643532 | 0.691905977 | 3.551219619 | 0.595499662 | 0.99901627 NA  |
| ASV_16s_22997 | 0.138244184 | 0.692353522 | 3.55108753  | 0.68650369  | 0.998437301 NA |
| ASV_16s_22998 | 0.108138077 | 0.691854203 | 3.551234907 | 0.587640135 | 0.999058128 NA |
| ASV_16s_22999 | 0.099368984 | 0.691011923 | 3.551293073 | 0.560739959 | 0.999192288 NA |
| ASV_16s_23000 | 0.099368984 | 0.691011923 | 3.551293073 | 0.560739959 | 0.999192288 NA |
| ASV_16s_23001 | 0.099368984 | 0.691011923 | 3.551293073 | 0.560739959 | 0.999192288 NA |
| ASV_16s_23002 | 0.099368984 | 0.691011923 | 3.551293073 | 0.560739959 | 0.999192288 NA |
| ASV_16s_23003 | 0.099368984 | 0.691011923 | 3.551293073 | 0.560739959 | 0.999192288 NA |
| ASV_16s_23004 | 0.099368984 | 0.691011923 | 3.551293073 | 0.560739959 | 0.999192288 NA |
| ASV_16s_23005 | 0.099368984 | 0.691011923 | 3.551293073 | 0.560739959 | 0.999192288 NA |
| ASV_16s_23006 | 0.099368984 | 0.691011923 | 3.551293073 | 0.560739959 | 0.999192288 NA |
| ASV_16s_23007 | 0.099368984 | 0.691011923 | 3.551293073 | 0.560739959 | 0.999192288 NA |
| ASV_16s_23008 | 0.099368984 | 0.691011923 | 3.551293073 | 0.560739959 | 0.999192288 NA |
| ASV_16s_23009 | 0.099368984 | 0.691011923 | 3.551293073 | 0.560739959 | 0.999192288 NA |
| ASV_16s_23010 | 0.099368984 | 0.691011923 | 3.551293073 | 0.560739959 | 0.999192288 NA |
| ASV_16s_23011 | 0.099368984 | 0.691011923 | 3.551293073 | 0.560739959 | 0.999192288 NA |
| ASV_16s_23012 | 0.099368984 | 0.691011923 | 3.551293073 | 0.560739959 | 0.999192288 NA |
| ASV_16s_23013 | 0.099368984 | 0.691011923 | 3.551293073 | 0.560739959 | 0.999192288 NA |
| ASV_16s_23014 | 0.099368984 | 0.691011923 | 3.551293073 | 0.560739959 | 0.999192288 NA |
| ASV_16s_23015 | 0.099368984 | 0.691011923 | 3.551293073 | 0.560739959 | 0.999192288 NA |
| ASV_16s_23016 | 0.128058844 | 0.692210418 | 3.551129756 | 0.652003684 | 0.998677955 NA |
| ASV_16s_23017 | 0.14597829  | 0.692448879 | 3.551059397 | 0.713186644 | 0.998232352 NA |
| ASV_16s_23018 | 0.145714142 | 0.692445789 | 3.551060308 | 0.71226914  | 0.99823968 NA  |
| ASV_16s_23019 | 0.133650088 | 1.079166539 | 3.551518209 | 0.377762623 | 0.999782499 NA |
| ASV_16s_23020 | 0.081592431 | 0.302710544 | 3.551951317 | 0.384296326 | 0.999769626 NA |
| ASV_16s_23021 | 0.081592431 | 0.302710544 | 3.551951317 | 0.384296326 | 0.999769626 NA |
| ASV_16s_23022 | 0.081592431 | 0.302710544 | 3.551951317 | 0.384296326 | 0.999769626 NA |
| ASV_16s_23023 | 0.081592431 | 0.302710544 | 3.551951317 | 0.384296326 | 0.999769626 NA |
| ASV_16s_23024 | 0.081592431 | 0.302710544 | 3.551951317 | 0.384296326 | 0.999769626 NA |
| ASV_16s_23025 | 0.081592431 | 0.302710544 | 3.551951317 | 0.384296326 | 0.999769626 NA |
| ASV_16s_23026 | 0.081592431 | 0.302710544 | 3.551951317 | 0.384296326 | 0.999769626 NA |
| ASV_16s_23027 | 0.081592431 | 0.302710544 | 3.551951317 | 0.384296326 | 0.999769626 NA |
| ASV_16s_23028 | 0.081592431 | 0.302710544 | 3.551951317 | 0.384296326 | 0.999769626 NA |
| ASV_16s_23029 | 0.081592431 | 0.302710544 | 3.551951317 | 0.384296326 | 0.999769626 NA |
| ASV_16s_23030 | 0.081592431 | 0.302710544 | 3.551951317 | 0.384296326 | 0.999769626 NA |
| ASV_16s_23031 | 0.081592431 | 0.302710544 | 3.551951317 | 0.384296326 | 0.999769626 NA |
| ASV_16s_23032 | 0.081592431 | 0.302710544 | 3.551951317 | 0.384296326 | 0.999769626 NA |
| ASV_16s_23033 | 0.081592431 | 0.302710544 | 3.551951317 | 0.384296326 | 0.999769626 NA |

|               |             |              |             |             |                |
|---------------|-------------|--------------|-------------|-------------|----------------|
| ASV_16s_23034 | 0.081592431 | 0.302710544  | 3.551951317 | 0.384296326 | 0.999769626 NA |
| ASV_16s_23035 | 0.081592431 | 0.302710544  | 3.551951317 | 0.384296326 | 0.999769626 NA |
| ASV_16s_23036 | 0.081592431 | 0.302710544  | 3.551951317 | 0.384296326 | 0.999769626 NA |
| ASV_16s_23037 | 0.081592431 | 0.302710544  | 3.551951317 | 0.384296326 | 0.999769626 NA |
| ASV_16s_23038 | 0.081592431 | 0.302710544  | 3.551951317 | 0.384296326 | 0.999769626 NA |
| ASV_16s_23039 | 0.081592431 | 0.302710544  | 3.551951317 | 0.384296326 | 0.999769626 NA |
| ASV_16s_23040 | 0.081592431 | 0.302710544  | 3.551951317 | 0.384296326 | 0.999769626 NA |
| ASV_16s_23041 | 0.081592431 | 0.302710544  | 3.551951317 | 0.384296326 | 0.999769626 NA |
| ASV_16s_23042 | 0.081592431 | 0.302710544  | 3.551951317 | 0.384296326 | 0.999769626 NA |
| ASV_16s_23043 | 0.081592431 | 0.302710544  | 3.551951317 | 0.384296326 | 0.999769626 NA |
| ASV_16s_23044 | 0.081592431 | 0.302710544  | 3.551951317 | 0.384296326 | 0.999769626 NA |
| ASV_16s_23045 | 0.081592431 | 0.302710544  | 3.551951317 | 0.384296326 | 0.999769626 NA |
| ASV_16s_23046 | 0.081592431 | 0.302710544  | 3.551951317 | 0.384296326 | 0.999769626 NA |
| ASV_16s_23047 | 0.081592431 | 0.302710544  | 3.551951317 | 0.384296326 | 0.999769626 NA |
| ASV_16s_23048 | 0.081592431 | 0.302710544  | 3.551951317 | 0.384296326 | 0.999769626 NA |
| ASV_16s_23049 | 0.081592431 | 0.302710544  | 3.551951317 | 0.384296326 | 0.999769626 NA |
| ASV_16s_23050 | 0.081592431 | 0.302710544  | 3.551951317 | 0.384296326 | 0.999769626 NA |
| ASV_16s_23051 | 0.081592431 | 0.302710544  | 3.551951317 | 0.384296326 | 0.999769626 NA |
| ASV_16s_23052 | 0.081592431 | 0.302710544  | 3.551951317 | 0.384296326 | 0.999769626 NA |
| ASV_16s_23053 | 0.081592431 | 0.302710544  | 3.551951317 | 0.384296326 | 0.999769626 NA |
| ASV_16s_23054 | 0.081592431 | 0.302710544  | 3.551951317 | 0.384296326 | 0.999769626 NA |
| ASV_16s_23055 | 0.081592431 | 0.302710544  | 3.551951317 | 0.384296326 | 0.999769626 NA |
| ASV_16s_23056 | 0.081592431 | 0.302710544  | 3.551951317 | 0.384296326 | 0.999769626 NA |
| ASV_16s_23057 | 0.081592431 | 0.302710544  | 3.551951317 | 0.384296326 | 0.999769626 NA |
| ASV_16s_23058 | 0.081592431 | 0.302710544  | 3.551951317 | 0.384296326 | 0.999769626 NA |
| ASV_16s_23059 | 0.081592431 | 0.302710544  | 3.551951317 | 0.384296326 | 0.999769626 NA |
| ASV_16s_23060 | 0.081592431 | 0.302710544  | 3.551951317 | 0.384296326 | 0.999769626 NA |
| ASV_16s_23061 | 0.081592431 | 0.302710544  | 3.551951317 | 0.384296326 | 0.999769626 NA |
| ASV_16s_23062 | 0.081592431 | 0.302710544  | 3.551951317 | 0.384296326 | 0.999769626 NA |
| ASV_16s_23063 | 0.081592431 | 0.302710544  | 3.551951317 | 0.384296326 | 0.999769626 NA |
| ASV_16s_23064 | 0.081592431 | 0.302710544  | 3.551951317 | 0.384296326 | 0.999769626 NA |
| ASV_16s_23065 | 0.089345188 | 0.047020984  | 3.55178861  | 0.512492776 | 0.99939944 NA  |
| ASV_16s_23066 | 0.081620952 | 0.095754908  | 3.551845552 | 0.474279584 | 0.999535316 NA |
| ASV_16s_23067 | 0.082887026 | 0.086197826  | 3.551836416 | 0.480179389 | 0.999515869 NA |
| ASV_16s_23068 | 0.081620952 | 0.095754908  | 3.551845552 | 0.474279584 | 0.999535316 NA |
| ASV_16s_23069 | 0.083145945 | 0.051215034  | 3.55181224  | 0.492797342 | 0.99947243 NA  |
| ASV_16s_23070 | 0.081626656 | 0.062148608  | 3.551825194 | 0.485813825 | 0.999496785 NA |
| ASV_16s_23071 | 0.083145945 | 0.051215034  | 3.55181224  | 0.492797342 | 0.99947243 NA  |
| ASV_16s_23072 | 0.083145945 | 0.051215034  | 3.55181224  | 0.492797342 | 0.99947243 NA  |
| ASV_16s_23073 | 0.083404863 | 0.017981133  | 3.551790738 | 0.503009322 | 0.999435388 NA |
| ASV_16s_23074 | 0.090605372 | -0.027567354 | 3.551714432 | 0.537394641 | 0.999297711 NA |
| ASV_16s_23075 | 0.083663782 | -0.013869194 | 3.551770727 | 0.510924063 | 0.999405491 NA |
| ASV_16s_23076 | 0.083663782 | -0.013869194 | 3.551770727 | 0.510924063 | 0.999405491 NA |
| ASV_16s_23077 | 0.083663782 | -0.013869194 | 3.551770727 | 0.510924063 | 0.999405491 NA |
| ASV_16s_23078 | 0.083663782 | -0.013869194 | 3.551770727 | 0.510924063 | 0.999405491 NA |
| ASV_16s_23079 | 0.083922701 | -0.045168859 | 3.551744704 | 0.516236558 | 0.999384831 NA |
| ASV_16s_23080 | 0.083922701 | -0.045168859 | 3.551744704 | 0.516236558 | 0.999384831 NA |
| ASV_16s_23081 | 0.081643768 | -0.031043971 | 3.551768867 | 0.506535551 | 0.999422197 NA |
| ASV_16s_23082 | 0.097324394 | -0.120111116 | 3.551589627 | 0.578307129 | 0.999106254 NA |
| ASV_16s_23083 | 0.083922701 | -0.045168859 | 3.551744704 | 0.516236558 | 0.999384831 NA |
| ASV_16s_23084 | 0.083922701 | -0.045168859 | 3.551744704 | 0.516236558 | 0.999384831 NA |
| ASV_16s_23085 | 0.08418162  | -0.075830127 | 3.551717031 | 0.518767755 | 0.999374818 NA |
| ASV_16s_23086 | 0.08418162  | -0.075830127 | 3.551717031 | 0.518767755 | 0.999374818 NA |
| ASV_16s_23087 | 0.08418162  | -0.075830127 | 3.551717031 | 0.518767755 | 0.999374818 NA |
| ASV_16s_23088 | 0.081655176 | -0.089957111 | 3.551724135 | 0.507807084 | 0.99941739 NA  |
| ASV_16s_23089 | 0.084440539 | -0.105542425 | 3.551692894 | 0.518877741 | 0.999374381 NA |
| ASV_16s_23090 | 0.081655176 | -0.089957111 | 3.551724135 | 0.507807084 | 0.99941739 NA  |
| ASV_16s_23091 | 0.084699458 | -0.134507758 | 3.551671946 | 0.516402214 | 0.999384179 NA |
| ASV_16s_23092 | 0.09115762  | -0.167067352 | 3.551600574 | 0.542281648 | 0.999276464 NA |
| ASV_16s_23093 | 0.08166088  | -0.118435782 | 3.551704156 | 0.504795397 | 0.999428732 NA |
| ASV_16s_23094 | 0.082926954 | -0.125259931 | 3.551690729 | 0.509583107 | 0.99941063 NA  |
| ASV_16s_23095 | 0.084699458 | -0.134507758 | 3.551671946 | 0.516402214 | 0.999384179 NA |
| ASV_16s_23096 | 0.097672251 | 0.127411487  | 3.551466621 | 0.23971699  | 0.999953301 NA |
| ASV_16s_23097 | 0.029168312 | -0.050285514 | 3.551905992 | 0.18773548  | 0.999979746 NA |
| ASV_16s_23098 | 0.029168312 | -0.050285514 | 3.551905992 | 0.18773548  | 0.999979746 NA |
| ASV_16s_23099 | 0.029168312 | -0.050285514 | 3.551905992 | 0.18773548  | 0.999979746 NA |
| ASV_16s_23100 | 0.029168312 | -0.050285514 | 3.551905992 | 0.18773548  | 0.999979746 NA |

|               |             |              |             |             |                |
|---------------|-------------|--------------|-------------|-------------|----------------|
| ASV_16s_23101 | 0.029168312 | -0.050285514 | 3.551905992 | 0.18773548  | 0.999979746 NA |
| ASV_16s_23102 | 0.138415586 | -0.520703086 | 3.551139298 | 0.556250029 | 0.999213342 NA |
| ASV_16s_23103 | 0.138415586 | -0.520703086 | 3.551139298 | 0.556250029 | 0.999213342 NA |
| ASV_16s_23104 | 0.138415586 | -0.520703086 | 3.551139298 | 0.556250029 | 0.999213342 NA |
| ASV_16s_23105 | 0.138415586 | -0.520703086 | 3.551139298 | 0.556250029 | 0.999213342 NA |
| ASV_16s_23106 | 0.11352958  | -0.453056791 | 3.551317764 | 0.478909593 | 0.9995201 NA   |
| ASV_16s_23107 | 0.111317796 | -0.446427045 | 3.5513363   | 0.472607734 | 0.999540728 NA |
| ASV_16s_23108 | 0.111317796 | -0.446427045 | 3.5513363   | 0.472607734 | 0.999540728 NA |
| ASV_16s_23109 | 0.111317796 | -0.446427045 | 3.5513363   | 0.472607734 | 0.999540728 NA |
| ASV_16s_23110 | 0.107608631 | -0.434941249 | 3.551368943 | 0.462126405 | 0.999573683 NA |
| ASV_16s_23111 | 0.107144986 | -0.433480666 | 3.551373144 | 0.460836679 | 0.999577623 NA |
| ASV_16s_23112 | 0.113407337 | -0.452740959 | 3.551318643 | 0.478628308 | 0.999521034 NA |
| ASV_16s_23113 | 0.109001659 | -0.4392936   | 3.551356494 | 0.466024259 | 0.999561623 NA |
| ASV_16s_23114 | 0.114800364 | -0.456891436 | 3.551307145 | 0.482689419 | 0.999507429 NA |
| ASV_16s_23115 | 0.114800364 | -0.456891436 | 3.551307145 | 0.482689419 | 0.999507429 NA |
| ASV_16s_23116 | 0.114800364 | -0.456891436 | 3.551307145 | 0.482689419 | 0.999507429 NA |
| ASV_16s_23117 | 0.114800364 | -0.456891436 | 3.551307145 | 0.482689419 | 0.999507429 NA |
| ASV_16s_23118 | 0.114800364 | -0.456891436 | 3.551307145 | 0.482689419 | 0.999507429 NA |
| ASV_16s_23119 | 0.114800364 | -0.456891436 | 3.551307145 | 0.482689419 | 0.999507429 NA |
| ASV_16s_23120 | 0.114800364 | -0.456891436 | 3.551307145 | 0.482689419 | 0.999507429 NA |
| ASV_16s_23121 | 0.109698172 | -0.44144891  | 3.551350364 | 0.467988318 | 0.999555458 NA |
| ASV_16s_23122 | 0.109060398 | -0.439473336 | 3.551355981 | 0.466187748 | 0.999561112 NA |
| ASV_16s_23123 | 0.102044884 | -0.417027888 | 3.551421237 | 0.446965673 | 0.999618437 NA |
| ASV_16s_23124 | 0.102044884 | -0.417027888 | 3.551421237 | 0.446965673 | 0.999618437 NA |
| ASV_16s_23125 | 0.102044884 | -0.417027888 | 3.551421237 | 0.446965673 | 0.999618437 NA |
| ASV_16s_23126 | 0.102044884 | -0.417027888 | 3.551421237 | 0.446965673 | 0.999618437 NA |
| ASV_16s_23127 | 0.102044884 | -0.417027888 | 3.551421237 | 0.446965673 | 0.999618437 NA |
| ASV_16s_23128 | 0.102044884 | -0.417027888 | 3.551421237 | 0.446965673 | 0.999618437 NA |
| ASV_16s_23129 | 0.102044884 | -0.417027888 | 3.551421237 | 0.446965673 | 0.999618437 NA |
| ASV_16s_23130 | 0.102044884 | -0.417027888 | 3.551421237 | 0.446965673 | 0.999618437 NA |
| ASV_16s_23131 | 0.102044884 | -0.417027888 | 3.551421237 | 0.446965673 | 0.999618437 NA |
| ASV_16s_23132 | 0.112603458 | -0.450324937 | 3.551325375 | 0.476302661 | 0.999528708 NA |
| ASV_16s_23133 | 0.100978765 | -0.41345616  | 3.55143187  | 0.444095324 | 0.999626532 NA |
| ASV_16s_23134 | 0.093228971 | -0.386923681 | 3.551501322 | 0.424310831 | 0.999679157 NA |
| ASV_16s_23135 | 0.086770808 | -0.362628608 | 3.551557691 | 0.408907868 | 0.999716426 NA |
| ASV_16s_23136 | 0.086770808 | -0.362628608 | 3.551557691 | 0.408907868 | 0.999716426 NA |
| ASV_16s_23137 | 0.086770808 | -0.362628608 | 3.551557691 | 0.408907868 | 0.999716426 NA |
| ASV_16s_23138 | 0.086770808 | -0.362628608 | 3.551557691 | 0.408907868 | 0.999716426 NA |
| ASV_16s_23139 | 0.086770808 | -0.362628608 | 3.551557691 | 0.408907868 | 0.999716426 NA |
| ASV_16s_23140 | 0.086770808 | -0.362628608 | 3.551557691 | 0.408907868 | 0.999716426 NA |
| ASV_16s_23141 | 0.086770808 | -0.362628608 | 3.551557691 | 0.408907868 | 0.999716426 NA |
| ASV_16s_23142 | 0.086770808 | -0.362628608 | 3.551557691 | 0.408907868 | 0.999716426 NA |
| ASV_16s_23143 | 0.086770808 | -0.362628608 | 3.551557691 | 0.408907868 | 0.999716426 NA |
| ASV_16s_23144 | 0.086770808 | -0.362628608 | 3.551557691 | 0.408907868 | 0.999716426 NA |
| ASV_16s_23145 | 0.086770808 | -0.362628608 | 3.551557691 | 0.408907868 | 0.999716426 NA |
| ASV_16s_23146 | 0.086770808 | -0.362628608 | 3.551557691 | 0.408907868 | 0.999716426 NA |
| ASV_16s_23147 | 0.085504734 | -0.357685221 | 3.551567392 | 0.405991916 | 0.999723129 NA |
| ASV_16s_23148 | 0.084238661 | -0.352648123 | 3.551577124 | 0.40312166  | 0.999729621 NA |
| ASV_16s_23149 | 0.084238661 | -0.352648123 | 3.551577124 | 0.40312166  | 0.999729621 NA |
| ASV_16s_23150 | 0.083985446 | -0.351604382 | 3.551578942 | 0.402550084 | 0.999730901 NA |
| ASV_16s_23151 | 0.083732231 | -0.350557951 | 3.551580768 | 0.401980539 | 0.999732172 NA |
| ASV_16s_23152 | 0.083225801 | -0.348456977 | 3.551584444 | 0.400847583 | 0.999734689 NA |
| ASV_16s_23153 | 0.083225801 | -0.348456977 | 3.551584444 | 0.400847583 | 0.999734689 NA |
| ASV_16s_23154 | 0.081706513 | -0.342088107 | 3.551595668 | 0.397498598 | 0.999742033 NA |
| ASV_16s_23155 | 0.081706513 | -0.342088107 | 3.551595668 | 0.397498598 | 0.999742033 NA |
| ASV_16s_23156 | 0.081706513 | -0.342088107 | 3.551595668 | 0.397498598 | 0.999742033 NA |
| ASV_16s_23157 | 0.081706513 | -0.342088107 | 3.551595668 | 0.397498598 | 0.999742033 NA |
| ASV_16s_23158 | 0.081706513 | -0.342088107 | 3.551595668 | 0.397498598 | 0.999742033 NA |
| ASV_16s_23159 | 0.081706513 | -0.342088107 | 3.551595668 | 0.397498598 | 0.999742033 NA |
| ASV_16s_23160 | 0.081706513 | -0.342088107 | 3.551595668 | 0.397498598 | 0.999742033 NA |
| ASV_16s_23161 | 0.081706513 | -0.342088107 | 3.551595668 | 0.397498598 | 0.999742033 NA |
| ASV_16s_23162 | 0.081706513 | -0.342088107 | 3.551595668 | 0.397498598 | 0.999742033 NA |
| ASV_16s_23163 | 0.081706513 | -0.342088107 | 3.551595668 | 0.397498598 | 0.999742033 NA |
| ASV_16s_23164 | 0.081706513 | -0.342088107 | 3.551595668 | 0.397498598 | 0.999742033 NA |
| ASV_16s_23165 | 0.081706513 | -0.342088107 | 3.551595668 | 0.397498598 | 0.999742033 NA |
| ASV_16s_23166 | 0.081706513 | -0.342088107 | 3.551595668 | 0.397498598 | 0.999742033 NA |
| ASV_16s_23167 | 0.081706513 | -0.342088107 | 3.551595668 | 0.397498598 | 0.999742033 NA |

|               |             |              |             |             |             |    |
|---------------|-------------|--------------|-------------|-------------|-------------|----|
| ASV_16s_23168 | 0.081706513 | -0.342088107 | 3.551595668 | 0.397498598 | 0.999742033 | NA |
| ASV_16s_23169 | 0.081706513 | -0.342088107 | 3.551595668 | 0.397498598 | 0.999742033 | NA |
| ASV_16s_23170 | 0.081706513 | -0.342088107 | 3.551595668 | 0.397498598 | 0.999742033 | NA |
| ASV_16s_23171 | 0.081706513 | -0.342088107 | 3.551595668 | 0.397498598 | 0.999742033 | NA |
| ASV_16s_23172 | 0.081706513 | -0.342088107 | 3.551595668 | 0.397498598 | 0.999742033 | NA |
| ASV_16s_23173 | 0.081706513 | -0.342088107 | 3.551595668 | 0.397498598 | 0.999742033 | NA |
| ASV_16s_23174 | 0.081706513 | -0.342088107 | 3.551595668 | 0.397498598 | 0.999742033 | NA |
| ASV_16s_23175 | 0.081706513 | -0.342088107 | 3.551595668 | 0.397498598 | 0.999742033 | NA |
| ASV_16s_23176 | 0.081706513 | -0.342088107 | 3.551595668 | 0.397498598 | 0.999742033 | NA |
| ASV_16s_23177 | 0.081706513 | -0.342088107 | 3.551595668 | 0.397498598 | 0.999742033 | NA |
| ASV_16s_23178 | 0.124450129 | -0.484438205 | 3.551232995 | 0.51175793  | 0.999402279 | NA |
| ASV_16s_23179 | 0.026669647 | 0.032495738  | 3.551299451 | 0.130386091 | 0.999994218 | NA |
| ASV_16s_23180 | 0.023090768 | -0.12142543  | 3.55138688  | 0.065216462 | 0.999999475 | NA |
| ASV_16s_23181 | 0.023090768 | -0.12142543  | 3.55138688  | 0.065216462 | 0.999999475 | NA |
| ASV_16s_23182 | 0.023090768 | -0.12142543  | 3.55138688  | 0.065216462 | 0.999999475 | NA |
| ASV_16s_23183 | 0.027448727 | 0.235645384  | 3.551437362 | 0.076754263 | 0.999999076 | NA |
| ASV_16s_23190 | 0.127424265 | 0.595906328  | 3.550765918 | 0.479604117 | 0.999517789 | NA |
| ASV_16s_23191 | 0.114800364 | 0.687070086  | 3.551131525 | 0.57949303  | 0.999100233 | NA |
| ASV_16s_23192 | 0.114800364 | 0.687070086  | 3.551131525 | 0.57949303  | 0.999100233 | NA |
| ASV_16s_23193 | 0.102502751 | -0.371915326 | 3.551574804 | 0.401141484 | 0.999734038 | NA |
| ASV_16s_23194 | 0.089692627 | -0.071544867 | 3.551827067 | 0.394286406 | 0.999748945 | NA |
| ASV_16s_23195 | 0.1080488   | -0.373542272 | 3.551572238 | 0.418502457 | 0.999693582 | NA |
| ASV_16s_23196 | 0.116557645 | 0.356228476  | 3.55183788  | 0.574501311 | 0.999125393 | NA |
| ASV_16s_23197 | 0.102094643 | -0.321366066 | 3.551613899 | 0.418098968 | 0.999694567 | NA |
| ASV_16s_23198 | 0.110507589 | -0.360162659 | 3.551461813 | 0.457681226 | 0.999587157 | NA |
| ASV_16s_23199 | 0.100685445 | -0.580424195 | 3.55151349  | 0.229347116 | 0.999959836 | NA |
| ASV_16s_23200 | 0.102822311 | -0.318483273 | 3.551538599 | 0.43332261  | 0.999655864 | NA |
| ASV_16s_23201 | 0.093829825 | 0.047318908  | 3.551566679 | 0.391472308 | 0.999754895 | NA |
| ASV_16s_23202 | 0.081234721 | -0.038002122 | 3.551819869 | 0.371287467 | 0.999794758 | NA |
| ASV_16s_23203 | 0.102933372 | -0.301195355 | 3.551475868 | 0.444994327 | 0.999624009 | NA |
| ASV_16s_23204 | 0.077827968 | -0.015089087 | 3.55182351  | 0.38987448  | 0.99975823  | NA |
| ASV_16s_23205 | 0.101232031 | -0.269668952 | 3.551533252 | 0.44293643  | 0.999629766 | NA |
| ASV_16s_23206 | 0.110059946 | -0.276696142 | 3.551436195 | 0.480465127 | 0.999514913 | NA |
| ASV_16s_23207 | 0.136376263 | -0.669914994 | 3.551290181 | 0.269375416 | 0.999930556 | NA |
| ASV_16s_23208 | 0.100099085 | 0.107506094  | 3.551467308 | 0.452739414 | 0.999601792 | NA |
| ASV_16s_23209 | 0.08752529  | 0.11003025   | 3.55162991  | 0.407804708 | 0.999718975 | NA |
| ASV_16s_23210 | 0.090079045 | 0.268795803  | 3.551834007 | 0.317285393 | 0.999879104 | NA |
| ASV_16s_23211 | 0.072496439 | 0.093127635  | 3.551117261 | 0.217773415 | 0.999966344 | NA |
| ASV_16s_23212 | 0.111030697 | 0.195716011  | 3.550469537 | 0.428247711 | 0.999669119 | NA |
| ASV_16s_23213 | 0.133797815 | 0.701841631  | 3.551559327 | 0.65096513  | 0.998684787 | NA |
| ASV_16s_23214 | 0.132950238 | -0.116296569 | 3.551889087 | 0.46058304  | 0.999578394 | NA |
| ASV_16s_23215 | 0.13183265  | 0.401034554  | 3.551771018 | 0.428658618 | 0.999668059 | NA |
| ASV_16s_23216 | 0.109605147 | 1.132241678  | 3.551705867 | 0.268583582 | 0.999931247 | NA |
| ASV_16s_23217 | 0.102702422 | -0.105641256 | 3.551557843 | 0.501495047 | 0.999440989 | NA |
| ASV_16s_23218 | 0.108932865 | 0.422140441  | 3.551590378 | 0.405432215 | 0.999724403 | NA |
| ASV_16s_23219 | 0.10388557  | 0.209207258  | 3.551748287 | 0.472925649 | 0.999539702 | NA |
| ASV_16s_23220 | 0.108697566 | -0.038351392 | 3.551718824 | 0.404403629 | 0.999726734 | NA |
| ASV_16s_23221 | 0.10237713  | 0.883077471  | 3.551832031 | 0.345194528 | 0.999839351 | NA |
| ASV_16s_23222 | 0.086558751 | -0.388421756 | 3.551540388 | 0.342300529 | 0.999843841 | NA |
| ASV_16s_23223 | 0.105398213 | -0.055316111 | 3.551365895 | 0.502011599 | 0.999439082 | NA |
| ASV_16s_23224 | 0.088169511 | -0.429316358 | 3.551428086 | 0.336738771 | 0.999852226 | NA |
| ASV_16s_23225 | 0.117210801 | 0.310820923  | 3.551293939 | 0.537142616 | 0.999298795 | NA |
| ASV_16s_23226 | 0.101536012 | 0.61084008   | 3.551949549 | 0.196012541 | 0.99997652  | NA |
| ASV_16s_23227 | 0.100686099 | -0.572307504 | 3.551352368 | 0.230609746 | 0.999959077 | NA |
| ASV_16s_23228 | 0.115599359 | 0.371638402  | 3.551215994 | 0.551412165 | 0.999235609 | NA |
| ASV_16s_23229 | 0.104730918 | 0.049887195  | 3.551304398 | 0.518585859 | 0.999375542 | NA |
| ASV_16s_23230 | 0.102328703 | -0.13884262  | 3.551210736 | 0.556435122 | 0.999212482 | NA |
| ASV_16s_23231 | 0.11785265  | -0.666827369 | 3.551515862 | 0.163233616 | 0.999987467 | NA |
| ASV_16s_23232 | 0.089060306 | 0.729112186  | 3.551499622 | 0.273197475 | 0.999927154 | NA |
| ASV_16s_23233 | 0.112838036 | 0.532711934  | 3.551212988 | 0.560153764 | 0.999195058 | NA |
| ASV_16s_23234 | 0.096583961 | 0.258754432  | 3.551278953 | 0.542694553 | 0.999274649 | NA |
| ASV_16s_23235 | 0.107185516 | 0.943417984  | 3.551652891 | 0.413316423 | 0.99970608  | NA |
| ASV_16s_23236 | 0.107185516 | 0.943417984  | 3.551652891 | 0.413316423 | 0.99970608  | NA |
| ASV_16s_23237 | 0.107185516 | 0.943417984  | 3.551652891 | 0.413316423 | 0.99970608  | NA |
| ASV_16s_23238 | 0.107185516 | 0.943417984  | 3.551652891 | 0.413316423 | 0.99970608  | NA |
| ASV_16s_23239 | 0.107185516 | 0.943417984  | 3.551652891 | 0.413316423 | 0.99970608  | NA |
| ASV_16s_23240 | 0.107185516 | 0.943417984  | 3.551652891 | 0.413316423 | 0.99970608  | NA |



|               |             |              |             |             |             |    |
|---------------|-------------|--------------|-------------|-------------|-------------|----|
| ASV_16s_23241 | 0.139501157 | -0.184416639 | 3.551079134 | 0.432616586 | 0.999657729 | NA |
| ASV_16s_23242 | 0.106737354 | 0.534821063  | 3.551690729 | 0.327121941 | 0.99986598  | NA |
| ASV_16s_23243 | 0.138332088 | 0.294810008  | 3.551813597 | 0.538455086 | 0.999293137 | NA |
| ASV_16s_23244 | 0.129898057 | 0.319722883  | 3.552019849 | 0.239195125 | 0.999953646 | NA |
| ASV_16s_23245 | 0.153967952 | 0.298054799  | 3.551890199 | 0.468807005 | 0.999552872 | NA |
| ASV_16s_23246 | 0.090457112 | 0.941949424  | 3.551649883 | 0.380695296 | 0.999776784 | NA |
| ASV_16s_23247 | 0.090457112 | 0.941949424  | 3.551649883 | 0.380695296 | 0.999776784 | NA |
| ASV_16s_23248 | 0.090457112 | 0.941949424  | 3.551649883 | 0.380695296 | 0.999776784 | NA |
| ASV_16s_23249 | 0.090457112 | 0.941949424  | 3.551649883 | 0.380695296 | 0.999776784 | NA |
| ASV_16s_23250 | 0.090457112 | 0.941949424  | 3.551649883 | 0.380695296 | 0.999776784 | NA |
| ASV_16s_23251 | 0.09353033  | 0.953556475  | 3.551623609 | 0.386708052 | 0.999764745 | NA |
| ASV_16s_23252 | 0.096603548 | 0.964841231  | 3.551598571 | 0.392958736 | 0.999751765 | NA |
| ASV_16s_23253 | 0.101784645 | 0.983168524  | 3.551558945 | 0.403986147 | 0.999727677 | NA |
| ASV_16s_23254 | 0.101784645 | 0.983168524  | 3.551558945 | 0.403986147 | 0.999727677 | NA |
| ASV_16s_23255 | 0.092032159 | 1.048662525  | 3.551626239 | 0.288973296 | 0.999911877 | NA |
| ASV_16s_23256 | 0.125172529 | 1.055967785  | 3.551410373 | 0.459648674 | 0.99958123  | NA |
| ASV_16s_23257 | 0.112915779 | 1.247314781  | 3.551477351 | 0.231151745 | 0.999958748 | NA |
| ASV_16s_23258 | 0.093387282 | 0.953026546  | 3.551624797 | 0.386424738 | 0.999765323 | NA |
| ASV_16s_23259 | 0.093387282 | 0.953026546  | 3.551624797 | 0.386424738 | 0.999765323 | NA |
| ASV_16s_23260 | 0.093387282 | 0.953026546  | 3.551624797 | 0.386424738 | 0.999765323 | NA |
| ASV_16s_23261 | 0.093387282 | 0.953026546  | 3.551624797 | 0.386424738 | 0.999765323 | NA |
| ASV_16s_23262 | 0.109091454 | 1.11959083   | 3.551648147 | 0.238538799 | 0.999954078 | NA |
| ASV_16s_23263 | 0.135310156 | 1.351985746  | 3.551259245 | 0.265502605 | 0.999933889 | NA |
| ASV_16s_23264 | 0.08853756  | 0.329004526  | 3.551999188 | 0.399961035 | 0.999736647 | NA |
| ASV_16s_23265 | 0.08853756  | 0.329004526  | 3.551999188 | 0.399961035 | 0.999736647 | NA |
| ASV_16s_23266 | 0.08853756  | 0.329004526  | 3.551999188 | 0.399961035 | 0.999736647 | NA |
| ASV_16s_23267 | 0.118551776 | 0.339421427  | 3.551921344 | 0.478850385 | 0.999520297 | NA |
| ASV_16s_23268 | 0.118551776 | 0.339421427  | 3.551921344 | 0.478850385 | 0.999520297 | NA |
| ASV_16s_23269 | 0.118551776 | 0.339421427  | 3.551921344 | 0.478850385 | 0.999520297 | NA |
| ASV_16s_23270 | 0.118551776 | 0.339421427  | 3.551921344 | 0.478850385 | 0.999520297 | NA |
| ASV_16s_23271 | 0.101588846 | 0.338062265  | 3.552030539 | 0.246431022 | 0.999948694 | NA |
| ASV_16s_23272 | 0.155293712 | 0.351425102  | 3.551781874 | 0.595182663 | NA          | NA |
| ASV_16s_23273 | 0.068611321 | 0.324984117  | 3.55203633  | 0.346023808 | 0.999838048 | NA |
| ASV_16s_23274 | 0.068611321 | 0.324984117  | 3.55203633  | 0.346023808 | 0.999838048 | NA |
| ASV_16s_23275 | 0.068611321 | 0.324984117  | 3.55203633  | 0.346023808 | 0.999838048 | NA |
| ASV_16s_23276 | 0.068611321 | 0.324984117  | 3.55203633  | 0.346023808 | 0.999838048 | NA |
| ASV_16s_23277 | 0.068611321 | 0.324984117  | 3.55203633  | 0.346023808 | 0.999838048 | NA |
| ASV_16s_23278 | 0.094559442 | 0.046903874  | 3.551963368 | 0.274326114 | 0.999926127 | NA |
| ASV_16s_23279 | 0.092901259 | 0.330503078  | 3.551987904 | 0.410138198 | 0.999713564 | NA |
| ASV_16s_23280 | 0.092901259 | 0.330503078  | 3.551987904 | 0.410138198 | 0.999713564 | NA |
| ASV_16s_23281 | 0.092901259 | 0.330503078  | 3.551987904 | 0.410138198 | 0.999713564 | NA |
| ASV_16s_23282 | 0.101671661 | 0.333676611  | 3.551965143 | 0.43201994  | 0.9996593   | NA |
| ASV_16s_23283 | 0.124704501 | 0.341515379  | 3.551900781 | 0.497109731 | 0.999456996 | NA |
| ASV_16s_23284 | 0.124704501 | 0.341515379  | 3.551900781 | 0.497109731 | 0.999456996 | NA |
| ASV_16s_23285 | 0.148765483 | -0.363901981 | 3.551440749 | 0.430955148 | 0.999662092 | NA |
| ASV_16s_23286 | 0.098640648 | -0.381095676 | 3.551556605 | 0.430171146 | 0.999664137 | NA |
| ASV_16s_23287 | 0.098640648 | -0.381095676 | 3.551556605 | 0.430171146 | 0.999664137 | NA |
| ASV_16s_23288 | 0.098640648 | -0.381095676 | 3.551556605 | 0.430171146 | 0.999664137 | NA |
| ASV_16s_23289 | 0.089692121 | -0.352756633 | 3.551636488 | 0.408703228 | 0.9997169   | NA |
| ASV_16s_23290 | 0.089692121 | -0.352756633 | 3.551636488 | 0.408703228 | 0.9997169   | NA |
| ASV_16s_23291 | 0.123583452 | 1.051480166  | 3.551419059 | 0.455637072 | 0.999593255 | NA |
| ASV_16s_23292 | 0.152877368 | 1.126276473  | 3.551247539 | 0.53529874  | 0.999306692 | NA |
| ASV_16s_23293 | 0.135195908 | 1.082912125  | 3.551346966 | 0.486045746 | 0.999495989 | NA |
| ASV_16s_23294 | 0.135195908 | 1.082912125  | 3.551346966 | 0.486045746 | 0.999495989 | NA |
| ASV_16s_23295 | 0.101593872 | 1.027100743  | 3.551318342 | 0.346713099 | 0.999836959 | NA |
| ASV_16s_23296 | 0.101593872 | 1.027100743  | 3.551318342 | 0.346713099 | 0.999836959 | NA |
| ASV_16s_23297 | 0.053022214 | 0.833595719  | 3.551745615 | 0.209341976 | 0.999970592 | NA |
| ASV_16s_23298 | 0.053022214 | 0.833595719  | 3.551745615 | 0.209341976 | 0.999970592 | NA |
| ASV_16s_23299 | 0.145734523 | 1.145654862  | 3.55104587  | 0.456524119 | 0.999590616 | NA |
| ASV_16s_23300 | 0.065711263 | 0.892923545  | 3.551627178 | 0.252384928 | 0.999944351 | NA |
| ASV_16s_23301 | 0.090898754 | 0.990928083  | 3.551411887 | 0.325535366 | 0.99986816  | NA |
| ASV_16s_23302 | 0.090898754 | 0.990928083  | 3.551411887 | 0.325535366 | 0.99986816  | NA |
| ASV_16s_23303 | 0.090898754 | 0.990928083  | 3.551411887 | 0.325535366 | 0.99986816  | NA |
| ASV_16s_23304 | 0.125282955 | 1.095855438  | 3.551153756 | 0.401945516 | 0.99973225  | NA |
| ASV_16s_23305 | 0.141326686 | 0.365655627  | 3.551503451 | 0.485430855 | NA          | NA |
| ASV_16s_23306 | 0.114898392 | 0.353465982  | 3.551628766 | 0.406439377 | 0.999722108 | NA |
| ASV_16s_23307 | 0.114898392 | 0.353465982  | 3.551628766 | 0.406439377 | 0.999722108 | NA |

|               |             |              |             |             |             |    |
|---------------|-------------|--------------|-------------|-------------|-------------|----|
| ASV_16s_23308 | 0.114898392 | 0.353465982  | 3.551628766 | 0.406439377 | 0.999722108 | NA |
| ASV_16s_23309 | 0.104230617 | 0.348036257  | 3.551680167 | 0.378001458 | 0.999782037 | NA |
| ASV_16s_23310 | 0.104230617 | 0.348036257  | 3.551680167 | 0.378001458 | 0.999782037 | NA |
| ASV_16s_23311 | 0.104230617 | 0.348036257  | 3.551680167 | 0.378001458 | 0.999782037 | NA |
| ASV_16s_23312 | 0.104230617 | 0.348036257  | 3.551680167 | 0.378001458 | 0.999782037 | NA |
| ASV_16s_23313 | 0.108523596 | 0.020437822  | 3.551286901 | 0.538268004 | 0.999293945 | NA |
| ASV_16s_23314 | 0.094637128 | 0.346016286  | 3.551710911 | 0.354255471 | 0.999824715 | NA |
| ASV_16s_23315 | 0.094637128 | 0.346016286  | 3.551710911 | 0.354255471 | 0.999824715 | NA |
| ASV_16s_23316 | 0.094637128 | 0.346016286  | 3.551710911 | 0.354255471 | 0.999824715 | NA |
| ASV_16s_23317 | 0.094637128 | 0.346016286  | 3.551710911 | 0.354255471 | 0.999824715 | NA |
| ASV_16s_23318 | 0.078121832 | 0.343217849  | 3.551766347 | 0.319483774 | 0.999876252 | NA |
| ASV_16s_23319 | 0.078121832 | 0.343217849  | 3.551766347 | 0.319483774 | 0.999876252 | NA |
| ASV_16s_23320 | 0.078121832 | 0.343217849  | 3.551766347 | 0.319483774 | 0.999876252 | NA |
| ASV_16s_23321 | 0.13382627  | 0.362373343  | 3.55154478  | 0.462095652 | NA          | NA |
| ASV_16s_23322 | 0.163158458 | 0.375659924  | 3.551376221 | 0.556823925 | NA          | NA |
| ASV_16s_23323 | 0.029430903 | 0.335948673  | 3.551953923 | 0.136464706 | 0.999993234 | NA |
| ASV_16s_23324 | 0.047489699 | -0.198928657 | 3.551633903 | 0.213332967 | 0.999968631 | NA |
| ASV_16s_23325 | 0.047489699 | -0.198928657 | 3.551633903 | 0.213332967 | 0.999968631 | NA |
| ASV_16s_23326 | 0.116496272 | -0.448152866 | 3.551109616 | 0.412640685 | NA          | NA |
| ASV_16s_23327 | 0.116496272 | -0.448152866 | 3.551109616 | 0.412640685 | NA          | NA |
| ASV_16s_23328 | 0.116496272 | -0.448152866 | 3.551109616 | 0.412640685 | NA          | NA |
| ASV_16s_23329 | 0.116496272 | -0.448152866 | 3.551109616 | 0.412640685 | NA          | NA |
| ASV_16s_23330 | 0.116496272 | -0.448152866 | 3.551109616 | 0.412640685 | NA          | NA |
| ASV_16s_23331 | 0.116496272 | -0.448152866 | 3.551109616 | 0.412640685 | NA          | NA |
| ASV_16s_23332 | 0.150273037 | -0.506617117 | 3.550770883 | 0.515622655 | NA          | NA |
| ASV_16s_23333 | 0.09111192  | -0.383308326 | 3.551316153 | 0.348332887 | 0.999834381 | NA |
| ASV_16s_23334 | 0.057675151 | -0.250824613 | 3.551563685 | 0.252184833 | 0.999944501 | NA |
| ASV_16s_23335 | 0.057675151 | -0.250824613 | 3.551563685 | 0.252184833 | 0.999944501 | NA |
| ASV_16s_23336 | 0.057675151 | -0.250824613 | 3.551563685 | 0.252184833 | 0.999944501 | NA |
| ASV_16s_23337 | 0.052858035 | -0.226879341 | 3.55160021  | 0.234146928 | 0.999956897 | NA |
| ASV_16s_23338 | 0.094637128 | -0.394539498 | 3.551291587 | 0.356446348 | 0.999821043 | NA |
| ASV_16s_23339 | 0.10425033  | 1.035571081  | 3.551297167 | 0.352396326 | 0.99982779  | NA |
| ASV_16s_23340 | 0.10425033  | 1.035571081  | 3.551297167 | 0.352396326 | 0.99982779  | NA |
| ASV_16s_23341 | 0.10425033  | 1.035571081  | 3.551297167 | 0.352396326 | 0.99982779  | NA |
| ASV_16s_23342 | 0.10425033  | 1.035571081  | 3.551297167 | 0.352396326 | 0.99982779  | NA |
| ASV_16s_23343 | 0.041902517 | 0.773835525  | 3.55181526  | 0.168276534 | 0.999986086 | NA |
| ASV_16s_23344 | 0.103674368 | 1.03375134   | 3.551301686 | 0.351150941 | 0.999829829 | NA |
| ASV_16s_23345 | 0.094637128 | -0.077697273 | 3.551090824 | 0.576205512 | 0.999116858 | NA |
| ASV_16s_23346 | 0.094637128 | -0.077697273 | 3.551090824 | 0.576205512 | 0.999116858 | NA |
| ASV_16s_23347 | 0.094637128 | -0.077697273 | 3.551090824 | 0.576205512 | 0.999116858 | NA |
| ASV_16s_23348 | 0.094637128 | -0.077697273 | 3.551090824 | 0.576205512 | 0.999116858 | NA |
| ASV_16s_23349 | 0.094637128 | -0.077697273 | 3.551090824 | 0.576205512 | 0.999116858 | NA |
| ASV_16s_23350 | 0.094637128 | -0.077697273 | 3.551090824 | 0.576205512 | 0.999116858 | NA |
| ASV_16s_23351 | 0.094637128 | -0.077697273 | 3.551090824 | 0.576205512 | 0.999116858 | NA |
| ASV_16s_23352 | 0.094637128 | -0.077697273 | 3.551090824 | 0.576205512 | 0.999116858 | NA |
| ASV_16s_23353 | 0.093022467 | -0.077654601 | 3.551100737 | 0.570219534 | 0.999146593 | NA |
| ASV_16s_23354 | 0.085576796 | -0.077495152 | 3.55115126  | 0.543215531 | 0.999272355 | NA |
| ASV_16s_23355 | 0.080698155 | -0.077367828 | 3.551189339 | 0.526145825 | 0.999345003 | NA |
| ASV_16s_23356 | 0.080698155 | -0.077367828 | 3.551189339 | 0.526145825 | 0.999345003 | NA |
| ASV_16s_23357 | 0.080698155 | -0.077367828 | 3.551189339 | 0.526145825 | 0.999345003 | NA |
| ASV_16s_23358 | 0.080698155 | -0.077367828 | 3.551189339 | 0.526145825 | 0.999345003 | NA |
| ASV_16s_23359 | 0.080698155 | -0.077367828 | 3.551189339 | 0.526145825 | 0.999345003 | NA |
| ASV_16s_23360 | 0.080698155 | -0.077367828 | 3.551189339 | 0.526145825 | 0.999345003 | NA |
| ASV_16s_23361 | 0.080698155 | -0.077367828 | 3.551189339 | 0.526145825 | 0.999345003 | NA |
| ASV_16s_23362 | 0.080698155 | -0.077367828 | 3.551189339 | 0.526145825 | 0.999345003 | NA |
| ASV_16s_23363 | 0.080698155 | -0.077367828 | 3.551189339 | 0.526145825 | 0.999345003 | NA |
| ASV_16s_23364 | 0.080698155 | -0.077367828 | 3.551189339 | 0.526145825 | 0.999345003 | NA |
| ASV_16s_23365 | 0.084320948 | -0.077463778 | 3.551160643 | 0.53877547  | 0.999291751 | NA |
| ASV_16s_23366 | 0.091048993 | -0.077622001 | 3.551113328 | 0.562967365 | 0.999181704 | NA |
| ASV_16s_23367 | 0.091048993 | -0.077622001 | 3.551113328 | 0.562967365 | 0.999181704 | NA |
| ASV_16s_23368 | 0.052887906 | 0.221030907  | 3.551116864 | 0.231622822 | 0.999958461 | NA |
| ASV_16s_23369 | 0.052887906 | 0.221030907  | 3.551116864 | 0.231622822 | 0.999958461 | NA |
| ASV_16s_23370 | 0.05571555  | 0.220325196  | 3.55109498  | 0.247331527 | 0.999948053 | NA |
| ASV_16s_23371 | 0.056122992 | 0.220322378  | 3.55109125  | 0.249560296 | 0.999946442 | NA |
| ASV_16s_23372 | 0.060076987 | 0.220296949  | 3.55105764  | 0.270968394 | 0.999929152 | NA |
| ASV_16s_23373 | 0.060076987 | 0.220296949  | 3.55105764  | 0.270968394 | 0.999929152 | NA |
| ASV_16s_23374 | 0.064290362 | 0.223776147  | 3.551142038 | 0.202972969 | 0.999973541 | NA |

|               |             |              |             |             |             |    |
|---------------|-------------|--------------|-------------|-------------|-------------|----|
| ASV_16s_23375 | 0.059957017 | 0.220297672  | 3.551058595 | 0.270326887 | 0.99992972  | NA |
| ASV_16s_23376 | 0.059957017 | 0.220297672  | 3.551058595 | 0.270326887 | 0.99992972  | NA |
| ASV_16s_23377 | 0.059957017 | 0.220297672  | 3.551058595 | 0.270326887 | 0.99992972  | NA |
| ASV_16s_23378 | 0.102535293 | 0.310962084  | 3.551224462 | 0.588741979 | 0.999052333 | NA |
| ASV_16s_23379 | 0.102535293 | 0.310962084  | 3.551224462 | 0.588741979 | 0.999052333 | NA |
| ASV_16s_23380 | 0.103141076 | 0.310961854  | 3.551220759 | 0.591041137 | 0.999040165 | NA |
| ASV_16s_23381 | 0.102405473 | 0.310962134  | 3.551225261 | 0.588249824 | 0.999054925 | NA |
| ASV_16s_23382 | 0.104266102 | 0.310961434  | 3.551213996 | 0.595325194 | 0.999017212 | NA |
| ASV_16s_23383 | 0.089406122 | 0.310968244  | 3.551316903 | 0.540289046 | 0.999285179 | NA |
| ASV_16s_23384 | 0.089406122 | 0.310968244  | 3.551316903 | 0.540289046 | 0.999285179 | NA |
| ASV_16s_23385 | 0.089406122 | 0.310968244  | 3.551316903 | 0.540289046 | 0.999285179 | NA |
| ASV_16s_23386 | 0.089406122 | 0.310968244  | 3.551316903 | 0.540289046 | 0.999285179 | NA |
| ASV_16s_23387 | 0.089406122 | 0.310968244  | 3.551316903 | 0.540289046 | 0.999285179 | NA |
| ASV_16s_23388 | 0.102210745 | 0.310962209  | 3.551226463 | 0.587512177 | 0.999058799 | NA |
| ASV_16s_23389 | 0.102210745 | 0.310962209  | 3.551226463 | 0.587512177 | 0.999058799 | NA |
| ASV_16s_23390 | 0.063286364 | 0.595355055  | 3.550983268 | 0.243001664 | 0.999951085 | NA |
| ASV_16s_23391 | 0.063286364 | 0.595355055  | 3.550983268 | 0.243001664 | 0.999951085 | NA |
| ASV_16s_23392 | 0.063286364 | 0.595355055  | 3.550983268 | 0.243001664 | 0.999951085 | NA |
| ASV_16s_23393 | 0.106939428 | 0.686948737  | 3.551173541 | 0.553409955 | 0.999226466 | NA |
| ASV_16s_23394 | 0.078701793 | 0.606877221  | 3.551033682 | 0.298020008 | 0.99990218  | NA |
| ASV_16s_23395 | 0.111574767 | 0.640153152  | 3.551568416 | 0.569769042 | 0.999148803 | NA |
| ASV_16s_23396 | 0.084166784 | -0.055164901 | 3.551415465 | 0.526161597 | 0.999344938 | NA |
| ASV_16s_23397 | 0.115762189 | 0.972341696  | 3.551416239 | 0.419790524 | 0.999690422 | NA |
| ASV_16s_23398 | 0.134579571 | 1.261808362  | 3.551477656 | 0.306486331 | 0.999892456 | NA |
| ASV_16s_23399 | 0.167478191 | 1.285199049  | 3.551323114 | 0.312711249 | 0.999884892 | NA |
| ASV_16s_23400 | 0.08515782  | -0.048629685 | 3.551516749 | 0.535608534 | 0.99930537  | NA |
| ASV_16s_23401 | 0.090850781 | -0.054577224 | 3.551414243 | 0.560358186 | 0.999194093 | NA |
| ASV_16s_23402 | 0.086148857 | -0.028414882 | 3.551623741 | 0.540390462 | 0.999284737 | NA |
| ASV_16s_23403 | 0.09078471  | -0.028704505 | 3.551596804 | 0.558187631 | 0.999204303 | NA |
| ASV_16s_23404 | 0.097138759 | 0.998616124  | 3.551631749 | 0.352131875 | 0.999828225 | NA |
| ASV_16s_23405 | 0.11755425  | 0.473484476  | 3.551453325 | 0.550045924 | 0.999241819 | NA |
| ASV_16s_23406 | 0.136877915 | 0.973574439  | 3.551429985 | 0.51837327  | 0.999376386 | NA |
| ASV_16s_23407 | 0.099334252 | -0.333647502 | 3.551248958 | 0.457074264 | 0.999588974 | NA |
| ASV_16s_23408 | 0.133790433 | 0.119080462  | 3.551515815 | 0.550513761 | 0.999239696 | NA |
| ASV_16s_23409 | 0.123583452 | 0.295835699  | 3.551854626 | 0.492767052 | 0.999472537 | NA |
| ASV_16s_23410 | 0.123583452 | 0.295835699  | 3.551854626 | 0.492767052 | 0.999472537 | NA |
| ASV_16s_23411 | 0.150790786 | -0.548443123 | 3.551056556 | 0.597488643 | 0.999005482 | NA |
| ASV_16s_23412 | 0.149513209 | 1.04595823   | 3.551359494 | 0.521179729 | 0.999365175 | NA |
| ASV_16s_23413 | 0.104871754 | 0.936696675  | 3.551669633 | 0.408233699 | 0.999717985 | NA |
| ASV_16s_23414 | 0.10345322  | 0.867888359  | 3.551591749 | 0.38907049  | 0.999759896 | NA |
| ASV_16s_23415 | 0.10345322  | 0.867888359  | 3.551591749 | 0.38907049  | 0.999759896 | NA |
| ASV_16s_23416 | 0.049056011 | 0.294049698  | 3.551908664 | 0.268461341 | 0.999931353 | NA |
| ASV_16s_23417 | 0.049056011 | 0.294049698  | 3.551908664 | 0.268461341 | 0.999931353 | NA |
| ASV_16s_23418 | 0.068033244 | 0.288041849  | 3.551858393 | 0.345209195 | 0.999839328 | NA |
| ASV_16s_23419 | 0.068033244 | 0.288041849  | 3.551858393 | 0.345209195 | 0.999839328 | NA |
| ASV_16s_23420 | 0.040400427 | 0.296759493  | 3.551930828 | 0.229223345 | 0.99995991  | NA |
| ASV_16s_23421 | 0.068756352 | -0.249402575 | 3.55169052  | 0.349264673 | 0.999832885 | NA |
| ASV_16s_23422 | 0.026124355 | -0.021417764 | 3.55189173  | 0.165910598 | 0.999986746 | NA |
| ASV_16s_23423 | 0.080199112 | 0.808958258  | 3.551690301 | 0.336962361 | 0.999851895 | NA |
| ASV_16s_23424 | 0.080199112 | 0.808958258  | 3.551690301 | 0.336962361 | 0.999851895 | NA |
| ASV_16s_23425 | 0.154623208 | -0.505195839 | 3.551077064 | 0.597360565 | NA          | NA |
| ASV_16s_23426 | 0.184324707 | -0.534506198 | 3.550785848 | 0.69977732  | NA          | NA |
| ASV_16s_23427 | 0.184324707 | -0.534506198 | 3.550785848 | 0.69977732  | NA          | NA |
| ASV_16s_23428 | 0.13051216  | -0.090365882 | 3.551612278 | 0.572054597 | 0.99913755  | NA |
| ASV_16s_23429 | 0.132618284 | 0.484989004  | 3.551248102 | 0.584240572 | 0.999075855 | NA |
| ASV_16s_23430 | 0.107185516 | -0.427199136 | 3.551192775 | 0.387444681 | 0.999763241 | NA |
| ASV_16s_23431 | 0.118848477 | 1.078492327  | 3.551193381 | 0.385965273 | 0.999766256 | NA |
| ASV_16s_23432 | 0.118848477 | 1.078492327  | 3.551193381 | 0.385965273 | 0.999766256 | NA |
| ASV_16s_23433 | 0.118848477 | 1.078492327  | 3.551193381 | 0.385965273 | 0.999766256 | NA |
| ASV_16s_23434 | 0.118848477 | 1.078492327  | 3.551193381 | 0.385965273 | 0.999766256 | NA |
| ASV_16s_23435 | 0.118848477 | 1.078492327  | 3.551193381 | 0.385965273 | 0.999766256 | NA |
| ASV_16s_23436 | 0.118848477 | 1.078492327  | 3.551193381 | 0.385965273 | 0.999766256 | NA |
| ASV_16s_23437 | 0.118848477 | 1.078492327  | 3.551193381 | 0.385965273 | 0.999766256 | NA |
| ASV_16s_23438 | 0.118848477 | 1.078492327  | 3.551193381 | 0.385965273 | 0.999766256 | NA |
| ASV_16s_23439 | 0.118848477 | 1.078492327  | 3.551193381 | 0.385965273 | 0.999766256 | NA |
| ASV_16s_23440 | 0.118848477 | 1.078492327  | 3.551193381 | 0.385965273 | 0.999766256 | NA |
| ASV_16s_23441 | 0.118848477 | 1.078492327  | 3.551193381 | 0.385965273 | 0.999766256 | NA |

|               |             |              |             |             |             |    |
|---------------|-------------|--------------|-------------|-------------|-------------|----|
| ASV_16s_23442 | 0.118848477 | 1.078492327  | 3.551193381 | 0.385965273 | 0.999766256 | NA |
| ASV_16s_23443 | 0.118848477 | 1.078492327  | 3.551193381 | 0.385965273 | 0.999766256 | NA |
| ASV_16s_23444 | 0.118848477 | 1.078492327  | 3.551193381 | 0.385965273 | 0.999766256 | NA |
| ASV_16s_23445 | 0.067723736 | -0.076942245 | 3.55131701  | 0.46779101  | 0.99955608  | NA |
| ASV_16s_23446 | 0.067723736 | -0.076942245 | 3.55131701  | 0.46779101  | 0.99955608  | NA |
| ASV_16s_23447 | 0.134666953 | -0.374796061 | 3.551172416 | 0.573269294 | 0.999131529 | NA |
| ASV_16s_23448 | 0.091493288 | -0.205371642 | 3.551416709 | 0.460213396 | 0.999579518 | NA |
| ASV_16s_23449 | 0.187410065 | -0.028684194 | 3.550953113 | 1.023397336 | 0.994442223 | NA |
| ASV_16s_23450 | 0.149490127 | -0.028353799 | 3.55106226  | 0.857208654 | 0.996815347 | NA |
| ASV_16s_23451 | 0.149490127 | -0.028353799 | 3.55106226  | 0.857208654 | 0.996815347 | NA |
| ASV_16s_23452 | 0.149490127 | -0.028353799 | 3.55106226  | 0.857208654 | 0.996815347 | NA |
| ASV_16s_23453 | 0.147347177 | 0.171397991  | 3.551166068 | 0.820174104 | 0.997232578 | NA |
| ASV_16s_23454 | 0.134590903 | 0.331107963  | 3.551035967 | 0.775666364 | 0.997684428 | NA |
| ASV_16s_23455 | 0.127974525 | 0.365421167  | 3.551066918 | 0.717451291 | 0.998198026 | NA |
| ASV_16s_23456 | 0.117050423 | -0.027170496 | 3.55120977  | 0.722083665 | 0.998160242 | NA |
| ASV_16s_23457 | 0.138615289 | 0.778916357  | 3.551174675 | 0.659165492 | 0.998630195 | NA |
| ASV_16s_23458 | 0.089351977 | -0.020401331 | 3.55140567  | 0.614949615 | 0.998907339 | NA |
| ASV_16s_23459 | 0.089351977 | -0.020401331 | 3.55140567  | 0.614949615 | 0.998907339 | NA |
| ASV_16s_23460 | 0.09225881  | 0.36807074   | 3.551474683 | 0.562505435 | 0.999183906 | NA |
| ASV_16s_23461 | 0.102096005 | -0.072620494 | 3.551102314 | 0.628513866 | 0.998826758 | NA |
| ASV_16s_23462 | 0.102096005 | -0.072620494 | 3.551102314 | 0.628513866 | 0.998826758 | NA |
| ASV_16s_23463 | 0.102096005 | -0.072620494 | 3.551102314 | 0.628513866 | 0.998826758 | NA |
| ASV_16s_23464 | 0.102096005 | -0.072620494 | 3.551102314 | 0.628513866 | 0.998826758 | NA |
| ASV_16s_23465 | 0.100947257 | -0.067731847 | 3.551156921 | 0.607426512 | 0.998950386 | NA |
| ASV_16s_23466 | 0.074566798 | -0.069391494 | 3.55131176  | 0.526011411 | 0.999345554 | NA |
| ASV_16s_23467 | 0.074566798 | -0.069391494 | 3.55131176  | 0.526011411 | 0.999345554 | NA |
| ASV_16s_23468 | 0.074566798 | -0.069391494 | 3.55131176  | 0.526011411 | 0.999345554 | NA |
| ASV_16s_23469 | 0.074566798 | -0.069391494 | 3.55131176  | 0.526011411 | 0.999345554 | NA |
| ASV_16s_23470 | 0.074566798 | -0.069391494 | 3.55131176  | 0.526011411 | 0.999345554 | NA |
| ASV_16s_23471 | 0.120756111 | 0.518343252  | 3.551447163 | 0.646886684 | 0.998711387 | NA |
| ASV_16s_23472 | 0.073226957 | -0.068921615 | 3.551325271 | 0.519364985 | 0.99937244  | NA |
| ASV_16s_23473 | 0.073226957 | -0.068921615 | 3.551325271 | 0.519364985 | 0.99937244  | NA |
| ASV_16s_23474 | 0.073226957 | -0.068921615 | 3.551325271 | 0.519364985 | 0.99937244  | NA |
| ASV_16s_23475 | 0.073226957 | -0.068921615 | 3.551325271 | 0.519364985 | 0.99937244  | NA |
| ASV_16s_23476 | 0.073226957 | -0.068921615 | 3.551325271 | 0.519364985 | 0.99937244  | NA |
| ASV_16s_23477 | 0.073226957 | -0.068921615 | 3.551325271 | 0.519364985 | 0.99937244  | NA |
| ASV_16s_23478 | 0.123583452 | -0.072977324 | 3.551000742 | 0.713769466 | 0.998227687 | NA |
| ASV_16s_23479 | 0.123583452 | -0.072977324 | 3.551000742 | 0.713769466 | 0.998227687 | NA |
| ASV_16s_23480 | 0.123583452 | -0.072977324 | 3.551000742 | 0.713769466 | 0.998227687 | NA |
| ASV_16s_23481 | 0.123583452 | -0.072977324 | 3.551000742 | 0.713769466 | 0.998227687 | NA |
| ASV_16s_23482 | 0.123583452 | -0.072977324 | 3.551000742 | 0.713769466 | 0.998227687 | NA |
| ASV_16s_23483 | 0.123583452 | -0.072977324 | 3.551000742 | 0.713769466 | 0.998227687 | NA |
| ASV_16s_23484 | 0.090857136 | -0.072367538 | 3.551174367 | 0.586374083 | 0.999064756 | NA |
| ASV_16s_23485 | 0.090857136 | -0.072367538 | 3.551174367 | 0.586374083 | 0.999064756 | NA |
| ASV_16s_23486 | 0.090857136 | -0.072367538 | 3.551174367 | 0.586374083 | 0.999064756 | NA |
| ASV_16s_23487 | 0.090857136 | -0.072367538 | 3.551174367 | 0.586374083 | 0.999064756 | NA |
| ASV_16s_23488 | 0.090857136 | -0.072367538 | 3.551174367 | 0.586374083 | 0.999064756 | NA |
| ASV_16s_23489 | 0.106308406 | 0.287714951  | 3.551283443 | 0.626662668 | 0.998837983 | NA |
| ASV_16s_23490 | 0.101925808 | 0.358081071  | 3.551563684 | 0.647743539 | 0.998705829 | NA |
| ASV_16s_23491 | 0.101925808 | 0.358081071  | 3.551563684 | 0.647743539 | 0.998705829 | NA |
| ASV_16s_23492 | 0.101925808 | 0.358081071  | 3.551563684 | 0.647743539 | 0.998705829 | NA |
| ASV_16s_23493 | 0.101925808 | 0.358081071  | 3.551563684 | 0.647743539 | 0.998705829 | NA |
| ASV_16s_23494 | 0.190627294 | 0.36421864   | 3.551346122 | 0.850862025 | 0.996889581 | NA |
| ASV_16s_23495 | 0.090608522 | 0.354058598  | 3.551637519 | 0.60544821  | 0.998961513 | NA |
| ASV_16s_23496 | 0.090608522 | 0.354058598  | 3.551637519 | 0.60544821  | 0.998961513 | NA |
| ASV_16s_23497 | 0.090608522 | 0.354058598  | 3.551637519 | 0.60544821  | 0.998961513 | NA |
| ASV_16s_23498 | 0.090608522 | 0.354058598  | 3.551637519 | 0.60544821  | 0.998961513 | NA |
| ASV_16s_23499 | 0.090608522 | 0.354058598  | 3.551637519 | 0.60544821  | 0.998961513 | NA |
| ASV_16s_23500 | 0.090608522 | 0.354058598  | 3.551637519 | 0.60544821  | 0.998961513 | NA |
| ASV_16s_23501 | 0.090608522 | 0.354058598  | 3.551637519 | 0.60544821  | 0.998961513 | NA |
| ASV_16s_23502 | 0.090608522 | 0.354058598  | 3.551637519 | 0.60544821  | 0.998961513 | NA |
| ASV_16s_23503 | 0.090608522 | 0.354058598  | 3.551637519 | 0.60544821  | 0.998961513 | NA |
| ASV_16s_23504 | 0.090608522 | 0.354058598  | 3.551637519 | 0.60544821  | 0.998961513 | NA |
| ASV_16s_23505 | 0.090608522 | 0.354058598  | 3.551637519 | 0.60544821  | 0.998961513 | NA |
| ASV_16s_23506 | 0.090608522 | 0.354058598  | 3.551637519 | 0.60544821  | 0.998961513 | NA |
| ASV_16s_23507 | 0.090608522 | 0.354058598  | 3.551637519 | 0.60544821  | 0.998961513 | NA |
| ASV_16s_23508 | 0.090608522 | 0.354058598  | 3.551637519 | 0.60544821  | 0.998961513 | NA |

|               |             |             |             |             |             |    |
|---------------|-------------|-------------|-------------|-------------|-------------|----|
| ASV_16s_23509 | 0.090608522 | 0.354058598 | 3.551637519 | 0.60544821  | 0.998961513 | NA |
| ASV_16s_23510 | 0.090608522 | 0.354058598 | 3.551637519 | 0.60544821  | 0.998961513 | NA |
| ASV_16s_23511 | 0.090608522 | 0.354058598 | 3.551637519 | 0.60544821  | 0.998961513 | NA |
| ASV_16s_23512 | 0.090608522 | 0.354058598 | 3.551637519 | 0.60544821  | 0.998961513 | NA |
| ASV_16s_23513 | 0.090608522 | 0.354058598 | 3.551637519 | 0.60544821  | 0.998961513 | NA |
| ASV_16s_23514 | 0.090608522 | 0.354058598 | 3.551637519 | 0.60544821  | 0.998961513 | NA |
| ASV_16s_23515 | 0.16605589  | 0.360288016 | 3.551205164 | 0.91114063  | 0.996137501 | NA |
| ASV_16s_23516 | 0.117400971 | 0.315939979 | 3.551196898 | 0.669289402 | 0.998560736 | NA |
| ASV_16s_23517 | 0.117400971 | 0.315939979 | 3.551196898 | 0.669289402 | 0.998560736 | NA |
| ASV_16s_23518 | 0.117400971 | 0.315939979 | 3.551196898 | 0.669289402 | 0.998560736 | NA |
| ASV_16s_23519 | 0.10148104  | 0.315940336 | 3.551291481 | 0.60751312  | 0.998949897 | NA |
| ASV_16s_23520 | 0.10148104  | 0.315940336 | 3.551291481 | 0.60751312  | 0.998949897 | NA |
| ASV_16s_23521 | 0.10148104  | 0.315940336 | 3.551291481 | 0.60751312  | 0.998949897 | NA |
| ASV_16s_23522 | 0.10148104  | 0.315940336 | 3.551291481 | 0.60751312  | 0.998949897 | NA |
| ASV_16s_23523 | 0.096690302 | 0.315940385 | 3.551325969 | 0.589581164 | 0.999047904 | NA |
| ASV_16s_23524 | 0.15754902  | 0.315939941 | 3.551042659 | 0.835648524 | 0.997062899 | NA |
| ASV_16s_23525 | 0.11665629  | 0.315939975 | 3.551200908 | 0.666038163 | 0.998583293 | NA |
| ASV_16s_23526 | 0.094637128 | 0.315940408 | 3.551341802 | 0.582009627 | 0.999087365 | NA |
| ASV_16s_23527 | 0.094637128 | 0.315940408 | 3.551341802 | 0.582009627 | 0.999087365 | NA |
| ASV_16s_23528 | 0.094637128 | 0.315940408 | 3.551341802 | 0.582009627 | 0.999087365 | NA |
| ASV_16s_23529 | 0.094637128 | 0.315940408 | 3.551341802 | 0.582009627 | 0.999087365 | NA |
| ASV_16s_23530 | 0.094637128 | 0.315940408 | 3.551341802 | 0.582009627 | 0.999087365 | NA |
| ASV_16s_23531 | 0.094637128 | 0.315940408 | 3.551341802 | 0.582009627 | 0.999087365 | NA |
| ASV_16s_23532 | 0.094637128 | 0.315940408 | 3.551341802 | 0.582009627 | 0.999087365 | NA |
| ASV_16s_23533 | 0.094637128 | 0.315940408 | 3.551341802 | 0.582009627 | 0.999087365 | NA |
| ASV_16s_23534 | 0.094637128 | 0.315940408 | 3.551341802 | 0.582009627 | 0.999087365 | NA |
| ASV_16s_23535 | 0.094637128 | 0.315940408 | 3.551341802 | 0.582009627 | 0.999087365 | NA |
| ASV_16s_23536 | 0.094637128 | 0.315940408 | 3.551341802 | 0.582009627 | 0.999087365 | NA |
| ASV_16s_23537 | 0.094637128 | 0.315940408 | 3.551341802 | 0.582009627 | 0.999087365 | NA |
| ASV_16s_23538 | 0.094637128 | 0.315940408 | 3.551341802 | 0.582009627 | 0.999087365 | NA |
| ASV_16s_23539 | 0.094637128 | 0.315940408 | 3.551341802 | 0.582009627 | 0.999087365 | NA |
| ASV_16s_23540 | 0.127424265 | 0.595906328 | 3.550765918 | 0.479604117 | 0.999517789 | NA |
| ASV_16s_23541 | 0.090126442 | 0.686594552 | 3.551287717 | 0.500492952 | 0.999444674 | NA |
| ASV_16s_23542 | 0.090126442 | 0.686594552 | 3.551287717 | 0.500492952 | 0.999444674 | NA |
| ASV_16s_23543 | 0.16281972  | 0.687607903 | 3.550962399 | 0.751060045 | 0.997911921 | NA |
| ASV_16s_23544 | 0.16281972  | 0.687607903 | 3.550962399 | 0.751060045 | 0.997911921 | NA |
| ASV_16s_23545 | 0.200315932 | 0.733758813 | 3.551112541 | 0.959561747 | 0.995454753 | NA |
| ASV_16s_23546 | 0.19439897  | 0.733700755 | 3.551128746 | 0.936563183 | 0.995787995 | NA |
| ASV_16s_23547 | 0.191769209 | 0.733674961 | 3.551136264 | 0.926386977 | 0.99593025  | NA |
| ASV_16s_23548 | 0.147910167 | 1.032082519 | 3.551273665 | 0.560861895 | 0.999191711 | NA |
| ASV_16s_23549 | 0.147945765 | 0.732305702 | 3.55129867  | 0.761169188 | 0.997820337 | NA |
| ASV_16s_23550 | 0.147945765 | 0.732305702 | 3.55129867  | 0.761169188 | 0.997820337 | NA |
| ASV_16s_23551 | 0.147945765 | 0.732305702 | 3.55129867  | 0.761169188 | 0.997820337 | NA |
| ASV_16s_23552 | 0.147945765 | 0.732305702 | 3.55129867  | 0.761169188 | 0.997820337 | NA |
| ASV_16s_23553 | 0.147945765 | 0.732305702 | 3.55129867  | 0.761169188 | 0.997820337 | NA |
| ASV_16s_23554 | 0.147945765 | 0.732305702 | 3.55129867  | 0.761169188 | 0.997820337 | NA |
| ASV_16s_23555 | 0.147945765 | 0.732305702 | 3.55129867  | 0.761169188 | 0.997820337 | NA |
| ASV_16s_23556 | 0.139469539 | 0.978369569 | 3.551482567 | 0.567478194 | 0.999159982 | NA |
| ASV_16s_23557 | 0.147945765 | 0.732305702 | 3.55129867  | 0.761169188 | 0.997820337 | NA |
| ASV_16s_23558 | 0.139982399 | 0.73094773  | 3.551336521 | 0.732140047 | 0.998076416 | NA |
| ASV_16s_23559 | 0.125193291 | 0.726894248 | 3.551412962 | 0.679491332 | 0.998488401 | NA |
| ASV_16s_23560 | 0.125193291 | 0.726894248 | 3.551412962 | 0.679491332 | 0.998488401 | NA |
| ASV_16s_23561 | 0.125193291 | 0.726894248 | 3.551412962 | 0.679491332 | 0.998488401 | NA |
| ASV_16s_23562 | 0.125193291 | 0.726894248 | 3.551412962 | 0.679491332 | 0.998488401 | NA |
| ASV_16s_23563 | 0.125193291 | 0.726894248 | 3.551412962 | 0.679491332 | 0.998488401 | NA |
| ASV_16s_23564 | 0.125193291 | 0.726894248 | 3.551412962 | 0.679491332 | 0.998488401 | NA |
| ASV_16s_23565 | 0.125193291 | 0.726894248 | 3.551412962 | 0.679491332 | 0.998488401 | NA |
| ASV_16s_23566 | 0.125193291 | 0.726894248 | 3.551412962 | 0.679491332 | 0.998488401 | NA |
| ASV_16s_23567 | 0.125193291 | 0.726894248 | 3.551412962 | 0.679491332 | 0.998488401 | NA |
| ASV_16s_23568 | 0.125193291 | 0.726894248 | 3.551412962 | 0.679491332 | 0.998488401 | NA |
| ASV_16s_23569 | 0.125193291 | 0.726894248 | 3.551412962 | 0.679491332 | 0.998488401 | NA |
| ASV_16s_23570 | 0.125193291 | 0.726894248 | 3.551412962 | 0.679491332 | 0.998488401 | NA |
| ASV_16s_23571 | 0.125193291 | 0.726894248 | 3.551412962 | 0.679491332 | 0.998488401 | NA |
| ASV_16s_23572 | 0.125193291 | 0.726894248 | 3.551412962 | 0.679491332 | 0.998488401 | NA |
| ASV_16s_23573 | 0.125193291 | 0.726894248 | 3.551412962 | 0.679491332 | 0.998488401 | NA |
| ASV_16s_23574 | 0.125193291 | 0.726894248 | 3.551412962 | 0.679491332 | 0.998488401 | NA |
| ASV_16s_23575 | 0.125193291 | 0.726894248 | 3.551412962 | 0.679491332 | 0.998488401 | NA |



|               |             |              |             |             |             |    |
|---------------|-------------|--------------|-------------|-------------|-------------|----|
| ASV_16s_23643 | 0.139026943 | 0.692353791  | 3.55108463  | 0.688459644 | 0.998422845 | NA |
| ASV_16s_23644 | 0.139026943 | 0.692353791  | 3.55108463  | 0.688459644 | 0.998422845 | NA |
| ASV_16s_23645 | 0.139026943 | 0.692353791  | 3.55108463  | 0.688459644 | 0.998422845 | NA |
| ASV_16s_23646 | 0.138775373 | 0.692350558  | 3.551085587 | 0.687557566 | 0.998429523 | NA |
| ASV_16s_23647 | 0.138775373 | 0.692350558  | 3.551085587 | 0.687557566 | 0.998429523 | NA |
| ASV_16s_23648 | 0.132622501 | 1.140190674  | 3.551573617 | 0.357106833 | 0.999819926 | NA |
| ASV_16s_23649 | 0.130803014 | 0.295330175  | 3.551834114 | 0.516386382 | 0.999384241 | NA |
| ASV_16s_23650 | 0.136044375 | -0.123538491 | 3.55129181  | 0.756147022 | 0.99786616  | NA |
| ASV_16s_23651 | 0.07751281  | 0.303407164  | 3.551953889 | 0.366514042 | 0.999803484 | NA |
| ASV_16s_23652 | 0.07751281  | 0.303407164  | 3.551953889 | 0.366514042 | 0.999803484 | NA |
| ASV_16s_23653 | 0.07751281  | 0.303407164  | 3.551953889 | 0.366514042 | 0.999803484 | NA |
| ASV_16s_23654 | 0.07751281  | 0.303407164  | 3.551953889 | 0.366514042 | 0.999803484 | NA |
| ASV_16s_23655 | 0.07751281  | 0.303407164  | 3.551953889 | 0.366514042 | 0.999803484 | NA |
| ASV_16s_23656 | 0.07751281  | 0.303407164  | 3.551953889 | 0.366514042 | 0.999803484 | NA |
| ASV_16s_23657 | 0.07751281  | 0.303407164  | 3.551953889 | 0.366514042 | 0.999803484 | NA |
| ASV_16s_23658 | 0.07751281  | 0.303407164  | 3.551953889 | 0.366514042 | 0.999803484 | NA |
| ASV_16s_23659 | 0.07751281  | 0.303407164  | 3.551953889 | 0.366514042 | 0.999803484 | NA |
| ASV_16s_23660 | 0.07751281  | 0.303407164  | 3.551953889 | 0.366514042 | 0.999803484 | NA |
| ASV_16s_23661 | 0.07751281  | 0.303407164  | 3.551953889 | 0.366514042 | 0.999803484 | NA |
| ASV_16s_23662 | 0.07751281  | 0.303407164  | 3.551953889 | 0.366514042 | 0.999803484 | NA |
| ASV_16s_23663 | 0.07751281  | 0.303407164  | 3.551953889 | 0.366514042 | 0.999803484 | NA |
| ASV_16s_23664 | 0.07751281  | 0.303407164  | 3.551953889 | 0.366514042 | 0.999803484 | NA |
| ASV_16s_23665 | 0.07751281  | 0.303407164  | 3.551953889 | 0.366514042 | 0.999803484 | NA |
| ASV_16s_23666 | 0.07751281  | 0.303407164  | 3.551953889 | 0.366514042 | 0.999803484 | NA |
| ASV_16s_23667 | 0.07751281  | 0.303407164  | 3.551953889 | 0.366514042 | 0.999803484 | NA |
| ASV_16s_23668 | 0.07751281  | 0.303407164  | 3.551953889 | 0.366514042 | 0.999803484 | NA |
| ASV_16s_23669 | 0.07751281  | 0.303407164  | 3.551953889 | 0.366514042 | 0.999803484 | NA |
| ASV_16s_23670 | 0.07751281  | 0.303407164  | 3.551953889 | 0.366514042 | 0.999803484 | NA |
| ASV_16s_23671 | 0.07751281  | 0.303407164  | 3.551953889 | 0.366514042 | 0.999803484 | NA |
| ASV_16s_23672 | 0.07751281  | 0.303407164  | 3.551953889 | 0.366514042 | 0.999803484 | NA |
| ASV_16s_23673 | 0.07751281  | 0.303407164  | 3.551953889 | 0.366514042 | 0.999803484 | NA |
| ASV_16s_23674 | 0.07751281  | 0.303407164  | 3.551953889 | 0.366514042 | 0.999803484 | NA |
| ASV_16s_23675 | 0.07751281  | 0.303407164  | 3.551953889 | 0.366514042 | 0.999803484 | NA |
| ASV_16s_23676 | 0.07751281  | 0.303407164  | 3.551953889 | 0.366514042 | 0.999803484 | NA |
| ASV_16s_23677 | 0.07751281  | 0.303407164  | 3.551953889 | 0.366514042 | 0.999803484 | NA |
| ASV_16s_23678 | 0.07751281  | 0.303407164  | 3.551953889 | 0.366514042 | 0.999803484 | NA |
| ASV_16s_23679 | 0.07751281  | 0.303407164  | 3.551953889 | 0.366514042 | 0.999803484 | NA |
| ASV_16s_23680 | 0.07751281  | 0.303407164  | 3.551953889 | 0.366514042 | 0.999803484 | NA |
| ASV_16s_23681 | 0.07751281  | 0.303407164  | 3.551953889 | 0.366514042 | 0.999803484 | NA |
| ASV_16s_23682 | 0.07751281  | 0.303407164  | 3.551953889 | 0.366514042 | 0.999803484 | NA |
| ASV_16s_23683 | 0.07751281  | 0.303407164  | 3.551953889 | 0.366514042 | 0.999803484 | NA |
| ASV_16s_23684 | 0.07751281  | 0.303407164  | 3.551953889 | 0.366514042 | 0.999803484 | NA |
| ASV_16s_23685 | 0.07751281  | 0.303407164  | 3.551953889 | 0.366514042 | 0.999803484 | NA |
| ASV_16s_23686 | 0.07751281  | 0.303407164  | 3.551953889 | 0.366514042 | 0.999803484 | NA |
| ASV_16s_23687 | 0.07751281  | 0.303407164  | 3.551953889 | 0.366514042 | 0.999803484 | NA |
| ASV_16s_23688 | 0.07751281  | 0.303407164  | 3.551953889 | 0.366514042 | 0.999803484 | NA |
| ASV_16s_23689 | 0.078807404 | 0.083552598  | 3.551846015 | 0.457015492 | 0.99958915  | NA |
| ASV_16s_23690 | 0.07754133  | 0.093431731  | 3.551854155 | 0.451221973 | 0.999606214 | NA |
| ASV_16s_23691 | 0.078807404 | 0.083552598  | 3.551846015 | 0.457015492 | 0.99958915  | NA |
| ASV_16s_23692 | 0.079066323 | 0.048073184  | 3.551825988 | 0.468624443 | 0.999553449 | NA |
| ASV_16s_23693 | 0.078306679 | 0.05369392   | 3.551831783 | 0.465168661 | 0.99956429  | NA |
| ASV_16s_23694 | 0.077552738 | 0.026400908  | 3.551817876 | 0.469939484 | 0.999549277 | NA |
| ASV_16s_23695 | 0.079325242 | 0.014250147  | 3.551804379 | 0.477806733 | 0.999523755 | NA |
| ASV_16s_23696 | 0.079325242 | 0.014250147  | 3.551804379 | 0.477806733 | 0.999523755 | NA |
| ASV_16s_23697 | 0.079584161 | -0.018042436 | 3.551785196 | 0.484579165 | 0.99950101  | NA |
| ASV_16s_23698 | 0.079843079 | -0.049466205 | 3.551765567 | 0.488559693 | 0.999487302 | NA |
| ASV_16s_23699 | 0.077564146 | -0.035574999 | 3.55178412  | 0.479025686 | 0.999519714 | NA |
| ASV_16s_23700 | 0.079843079 | -0.049466205 | 3.551765567 | 0.488559693 | 0.999487302 | NA |
| ASV_16s_23701 | 0.079843079 | -0.049466205 | 3.551765567 | 0.488559693 | 0.999487302 | NA |
| ASV_16s_23702 | 0.079089139 | -0.074457031 | 3.551752574 | 0.485810062 | 0.999496798 | NA |
| ASV_16s_23703 | 0.077569851 | -0.06534212  | 3.551767497 | 0.479709881 | 0.999517436 | NA |
| ASV_16s_23704 | 0.080101998 | -0.080559041 | 3.551741455 | 0.489945042 | 0.999482472 | NA |
| ASV_16s_23705 | 0.080101998 | -0.080559041 | 3.551741455 | 0.489945042 | 0.999482472 | NA |
| ASV_16s_23706 | 0.080360917 | -0.110978957 | 3.551717825 | 0.48876515  | 0.999486588 | NA |
| ASV_16s_23707 | 0.080360917 | -0.110978957 | 3.551717825 | 0.48876515  | 0.999486588 | NA |
| ASV_16s_23708 | 0.080360917 | -0.110978957 | 3.551717825 | 0.48876515  | 0.999486588 | NA |
| ASV_16s_23709 | 0.080360917 | -0.110978957 | 3.551717825 | 0.48876515  | 0.999486588 | NA |

|               |             |              |             |             |             |    |
|---------------|-------------|--------------|-------------|-------------|-------------|----|
| ASV_16s_23710 | 0.079100547 | -0.132428189 | 3.551712438 | 0.479352395 | 0.999518627 | NA |
| ASV_16s_23711 | 0.080619836 | -0.140644025 | 3.551697255 | 0.485088201 | 0.999499271 | NA |
| ASV_16s_23712 | 0.077581259 | -0.124031012 | 3.551728144 | 0.473728016 | 0.999537106 | NA |
| ASV_16s_23713 | 0.087048491 | -0.253621419 | 3.551586189 | 0.477369613 | 0.999525198 | NA |
| ASV_16s_23714 | 0.080383733 | -0.223008079 | 3.551652596 | 0.455126098 | 0.999594769 | NA |
| ASV_16s_23715 | 0.027709896 | -0.03881604  | 3.551910472 | 0.180088488 | 0.999982437 | NA |
| ASV_16s_23716 | 0.027709896 | -0.03881604  | 3.551910472 | 0.180088488 | 0.999982437 | NA |
| ASV_16s_23717 | 0.131494806 | -0.503096281 | 3.551184363 | 0.536172101 | 0.999302959 | NA |
| ASV_16s_23718 | 0.143251247 | -0.532383854 | 3.551109578 | 0.577143729 | 0.999112134 | NA |
| ASV_16s_23719 | 0.105751906 | -0.428936528 | 3.551386283 | 0.453454438 | 0.999599697 | NA |
| ASV_16s_23720 | 0.105751906 | -0.428936528 | 3.551386283 | 0.453454438 | 0.999599697 | NA |
| ASV_16s_23721 | 0.105751906 | -0.428936528 | 3.551386283 | 0.453454438 | 0.999599697 | NA |
| ASV_16s_23722 | 0.105751906 | -0.428936528 | 3.551386283 | 0.453454438 | 0.999599697 | NA |
| ASV_16s_23723 | 0.105751906 | -0.428936528 | 3.551386283 | 0.453454438 | 0.999599697 | NA |
| ASV_16s_23724 | 0.107144933 | -0.433359058 | 3.551373495 | 0.45761793  | 0.999587347 | NA |
| ASV_16s_23725 | 0.10111545  | -0.413819565 | 3.551430784 | 0.4398956   | 0.999638162 | NA |
| ASV_16s_23726 | 0.100651805 | -0.412296807 | 3.551435074 | 0.438567711 | 0.999641788 | NA |
| ASV_16s_23727 | 0.107667319 | -0.435003903 | 3.551368764 | 0.45919012  | 0.999582616 | NA |
| ASV_16s_23728 | 0.100651805 | -0.412296807 | 3.551435074 | 0.438567711 | 0.999641788 | NA |
| ASV_16s_23729 | 0.109060346 | -0.43935432  | 3.55135632  | 0.463411066 | 0.999569733 | NA |
| ASV_16s_23730 | 0.109060346 | -0.43935432  | 3.55135632  | 0.463411066 | 0.999569733 | NA |
| ASV_16s_23731 | 0.109060346 | -0.43935432  | 3.55135632  | 0.463411066 | 0.999569733 | NA |
| ASV_16s_23732 | 0.109060346 | -0.43935432  | 3.55135632  | 0.463411066 | 0.999569733 | NA |
| ASV_16s_23733 | 0.09694264  | -0.400019979 | 3.551468527 | 0.428134696 | 0.99966941  | NA |
| ASV_16s_23734 | 0.09694264  | -0.400019979 | 3.551468527 | 0.428134696 | 0.99966941  | NA |
| ASV_16s_23735 | 0.09694264  | -0.400019979 | 3.551468527 | 0.428134696 | 0.99966941  | NA |
| ASV_16s_23736 | 0.09694264  | -0.400019979 | 3.551468527 | 0.428134696 | 0.99966941  | NA |
| ASV_16s_23737 | 0.09694264  | -0.400019979 | 3.551468527 | 0.428134696 | 0.99966941  | NA |
| ASV_16s_23738 | 0.09694264  | -0.400019979 | 3.551468527 | 0.428134696 | 0.99966941  | NA |
| ASV_16s_23739 | 0.09694264  | -0.400019979 | 3.551468527 | 0.428134696 | 0.99966941  | NA |
| ASV_16s_23740 | 0.09694264  | -0.400019979 | 3.551468527 | 0.428134696 | 0.99966941  | NA |
| ASV_16s_23741 | 0.09694264  | -0.400019979 | 3.551468527 | 0.428134696 | 0.99966941  | NA |
| ASV_16s_23742 | 0.09694264  | -0.400019979 | 3.551468527 | 0.428134696 | 0.99966941  | NA |
| ASV_16s_23743 | 0.09694264  | -0.400019979 | 3.551468527 | 0.428134696 | 0.99966941  | NA |
| ASV_16s_23744 | 0.083800576 | -0.350674888 | 3.551580563 | 0.393524516 | 0.999750566 | NA |
| ASV_16s_23745 | 0.082432268 | -0.345025507 | 3.551590476 | 0.390204358 | 0.999757544 | NA |
| ASV_16s_23746 | 0.082432268 | -0.345025507 | 3.551590476 | 0.390204358 | 0.999757544 | NA |
| ASV_16s_23747 | 0.082432268 | -0.345025507 | 3.551590476 | 0.390204358 | 0.999757544 | NA |
| ASV_16s_23748 | 0.082432268 | -0.345025507 | 3.551590476 | 0.390204358 | 0.999757544 | NA |
| ASV_16s_23749 | 0.082432268 | -0.345025507 | 3.551590476 | 0.390204358 | 0.999757544 | NA |
| ASV_16s_23750 | 0.082432268 | -0.345025507 | 3.551590476 | 0.390204358 | 0.999757544 | NA |
| ASV_16s_23751 | 0.082432268 | -0.345025507 | 3.551590476 | 0.390204358 | 0.999757544 | NA |
| ASV_16s_23752 | 0.082432268 | -0.345025507 | 3.551590476 | 0.390204358 | 0.999757544 | NA |
| ASV_16s_23753 | 0.082432268 | -0.345025507 | 3.551590476 | 0.390204358 | 0.999757544 | NA |
| ASV_16s_23754 | 0.082432268 | -0.345025507 | 3.551590476 | 0.390204358 | 0.999757544 | NA |
| ASV_16s_23755 | 0.082432268 | -0.345025507 | 3.551590476 | 0.390204358 | 0.999757544 | NA |
| ASV_16s_23756 | 0.082432268 | -0.345025507 | 3.551590476 | 0.390204358 | 0.999757544 | NA |
| ASV_16s_23757 | 0.082432268 | -0.345025507 | 3.551590476 | 0.390204358 | 0.999757544 | NA |
| ASV_16s_23758 | 0.082432268 | -0.345025507 | 3.551590476 | 0.390204358 | 0.999757544 | NA |
| ASV_16s_23759 | 0.082432268 | -0.345025507 | 3.551590476 | 0.390204358 | 0.999757544 | NA |
| ASV_16s_23760 | 0.082432268 | -0.345025507 | 3.551590476 | 0.390204358 | 0.999757544 | NA |
| ASV_16s_23761 | 0.082432268 | -0.345025507 | 3.551590476 | 0.390204358 | 0.999757544 | NA |
| ASV_16s_23762 | 0.082432268 | -0.345025507 | 3.551590476 | 0.390204358 | 0.999757544 | NA |
| ASV_16s_23763 | 0.082432268 | -0.345025507 | 3.551590476 | 0.390204358 | 0.999757544 | NA |
| ASV_16s_23764 | 0.082432268 | -0.345025507 | 3.551590476 | 0.390204358 | 0.999757544 | NA |
| ASV_16s_23765 | 0.082432268 | -0.345025507 | 3.551590476 | 0.390204358 | 0.999757544 | NA |
| ASV_16s_23766 | 0.081419409 | -0.34075301  | 3.551598036 | 0.387754033 | 0.999762607 | NA |
| ASV_16s_23767 | 0.093736064 | -0.38859937  | 3.551497174 | 0.419228181 | 0.999691804 | NA |
| ASV_16s_23768 | 0.097503996 | -0.401827434 | 3.551463554 | 0.429597528 | 0.999665628 | NA |
| ASV_16s_23769 | 0.080153335 | -0.335349358 | 3.551607678 | 0.384739666 | 0.999768734 | NA |
| ASV_16s_23770 | 0.101271928 | -0.414267999 | 3.551429446 | 0.440250814 | 0.999637188 | NA |
| ASV_16s_23771 | 0.07990012  | -0.334260838 | 3.551609631 | 0.384143383 | 0.999769934 | NA |
| ASV_16s_23772 | 0.079393691 | -0.332073114 | 3.551613567 | 0.382957444 | 0.999772306 | NA |
| ASV_16s_23773 | 0.079393691 | -0.332073114 | 3.551613567 | 0.382957444 | 0.999772306 | NA |
| ASV_16s_23774 | 0.077621187 | -0.324321121 | 3.551627635 | 0.378878099 | 0.999780337 | NA |
| ASV_16s_23775 | 0.077621187 | -0.324321121 | 3.551627635 | 0.378878099 | 0.999780337 | NA |
| ASV_16s_23776 | 0.077621187 | -0.324321121 | 3.551627635 | 0.378878099 | 0.999780337 | NA |



|               |             |              |             |             |                |
|---------------|-------------|--------------|-------------|-------------|----------------|
| ASV_16s_23777 | 0.077621187 | -0.324321121 | 3.551627635 | 0.378878099 | 0.999780337 NA |
| ASV_16s_23778 | 0.077621187 | -0.324321121 | 3.551627635 | 0.378878099 | 0.999780337 NA |
| ASV_16s_23779 | 0.077621187 | -0.324321121 | 3.551627635 | 0.378878099 | 0.999780337 NA |
| ASV_16s_23780 | 0.077621187 | -0.324321121 | 3.551627635 | 0.378878099 | 0.999780337 NA |
| ASV_16s_23781 | 0.077621187 | -0.324321121 | 3.551627635 | 0.378878099 | 0.999780337 NA |
| ASV_16s_23782 | 0.077621187 | -0.324321121 | 3.551627635 | 0.378878099 | 0.999780337 NA |
| ASV_16s_23783 | 0.077621187 | -0.324321121 | 3.551627635 | 0.378878099 | 0.999780337 NA |
| ASV_16s_23784 | 0.077621187 | -0.324321121 | 3.551627635 | 0.378878099 | 0.999780337 NA |
| ASV_16s_23785 | 0.077621187 | -0.324321121 | 3.551627635 | 0.378878099 | 0.999780337 NA |
| ASV_16s_23786 | 0.077621187 | -0.324321121 | 3.551627635 | 0.378878099 | 0.999780337 NA |
| ASV_16s_23787 | 0.077621187 | -0.324321121 | 3.551627635 | 0.378878099 | 0.999780337 NA |
| ASV_16s_23788 | 0.077621187 | -0.324321121 | 3.551627635 | 0.378878099 | 0.999780337 NA |
| ASV_16s_23789 | 0.077621187 | -0.324321121 | 3.551627635 | 0.378878099 | 0.999780337 NA |
| ASV_16s_23790 | 0.077621187 | -0.324321121 | 3.551627635 | 0.378878099 | 0.999780337 NA |
| ASV_16s_23791 | 0.077621187 | -0.324321121 | 3.551627635 | 0.378878099 | 0.999780337 NA |
| ASV_16s_23792 | 0.077621187 | -0.324321121 | 3.551627635 | 0.378878099 | 0.999780337 NA |
| ASV_16s_23793 | 0.077621187 | -0.324321121 | 3.551627635 | 0.378878099 | 0.999780337 NA |
| ASV_16s_23794 | 0.077621187 | -0.324321121 | 3.551627635 | 0.378878099 | 0.999780337 NA |
| ASV_16s_23795 | 0.077621187 | -0.324321121 | 3.551627635 | 0.378878099 | 0.999780337 NA |
| ASV_16s_23796 | 0.077621187 | -0.324321121 | 3.551627635 | 0.378878099 | 0.999780337 NA |
| ASV_16s_23797 | 0.077621187 | -0.324321121 | 3.551627635 | 0.378878099 | 0.999780337 NA |
| ASV_16s_23798 | 0.077621187 | -0.324321121 | 3.551627635 | 0.378878099 | 0.999780337 NA |
| ASV_16s_23799 | 0.077621187 | -0.324321121 | 3.551627635 | 0.378878099 | 0.999780337 NA |
| ASV_16s_23800 | 0.077621187 | -0.324321121 | 3.551627635 | 0.378878099 | 0.999780337 NA |
| ASV_16s_23801 | 0.088307091 | -0.368334944 | 3.551546543 | 0.404877579 | 0.999725662 NA |
| ASV_16s_23802 | 0.118227623 | -0.466779752 | 3.551280101 | 0.492123457 | 0.999474814 NA |
| ASV_16s_23803 | 0.118227623 | -0.466779752 | 3.551280101 | 0.492123457 | 0.999474814 NA |
| ASV_16s_23804 | 0.0171898   | -0.081263359 | 3.551499144 | 0.024525123 | 0.999999983 NA |
| ASV_16s_23805 | 0.0171898   | -0.081263359 | 3.551499144 | 0.024525123 | 0.999999983 NA |
| ASV_16s_23806 | 0.03447532  | 0.230572834  | 3.551304392 | 0.121221843 | 0.999995504 NA |
| ASV_16s_23810 | 0.121053052 | 0.595877399  | 3.550777292 | 0.454621205 | 0.999596262 NA |
| ASV_16s_23811 | 0.121053052 | 0.595877399  | 3.550777292 | 0.454621205 | 0.999596262 NA |
| ASV_16s_23812 | 0.054924001 | 0.595189174  | 3.551048798 | 0.202083599 | 0.999973936 NA |
| ASV_16s_23813 | 0.109060346 | 0.686985262  | 3.551161739 | 0.555399379 | 0.999217289 NA |
| ASV_16s_23814 | 0.109060346 | 0.686985262  | 3.551161739 | 0.555399379 | 0.999217289 NA |
| ASV_16s_23815 | 0.0924527   | 0.036033373  | 3.551773607 | 0.443670338 | 0.99962772 NA  |
| ASV_16s_23816 | 0.092187658 | -0.391314502 | 3.551622842 | 0.321012879 | 0.999874241 NA |
| ASV_16s_23817 | 0.097909496 | -0.012970608 | 3.551825947 | 0.464445288 | 0.999566536 NA |
| ASV_16s_23818 | 0.10283491  | -0.347273723 | 3.551610791 | 0.341936331 | 0.9998444 NA   |
| ASV_16s_23819 | 0.104501563 | -0.35835516  | 3.551600779 | 0.402863023 | 0.9997302 NA   |
| ASV_16s_23820 | 0.081217737 | -0.440685937 | 3.551616169 | 0.293740924 | 0.999906854 NA |
| ASV_16s_23821 | 0.080773984 | 0.071117733  | 3.551925578 | 0.336273596 | 0.999852912 NA |
| ASV_16s_23822 | 0.11966889  | -0.631958965 | 3.551254302 | 0.333281097 | 0.999857278 NA |
| ASV_16s_23823 | 0.115683295 | -0.37702424  | 3.551544295 | 0.448575293 | 0.999613845 NA |
| ASV_16s_23824 | 0.113254129 | -0.336057216 | 3.55162094  | 0.339207774 | 0.999848543 NA |
| ASV_16s_23825 | 0.096101177 | -0.3200814   | 3.551653222 | 0.383909666 | 0.999770402 NA |
| ASV_16s_23826 | 0.104681169 | -0.330777368 | 3.551595487 | 0.420573385 | 0.999688491 NA |
| ASV_16s_23827 | 0.097609006 | -0.295705333 | 3.551659534 | 0.397781856 | 0.999741418 NA |
| ASV_16s_23828 | 0.112624045 | -0.486777297 | 3.551467105 | 0.405017604 | 0.999725345 NA |
| ASV_16s_23829 | 0.09808282  | -0.31352449  | 3.551575087 | 0.406184996 | 0.999722689 NA |
| ASV_16s_23830 | 0.103086823 | -0.321380273 | 3.551534214 | 0.426673396 | 0.999673158 NA |
| ASV_16s_23831 | 0.103605229 | -0.322104739 | 3.55153312  | 0.429058227 | 0.999667026 NA |
| ASV_16s_23832 | 0.103254497 | -0.311840909 | 3.551547782 | 0.428102834 | 0.999669492 NA |
| ASV_16s_23833 | 0.090292308 | 0.11219614   | 3.551834208 | 0.321006284 | 0.999874249 NA |
| ASV_16s_23834 | 0.102109086 | -0.270497672 | 3.551524772 | 0.435227418 | 0.999650797 NA |
| ASV_16s_23835 | 0.100835628 | -0.270497674 | 3.551524772 | 0.430762599 | 0.999662595 NA |
| ASV_16s_23836 | 0.097831127 | -0.271596427 | 3.551513678 | 0.421140256 | 0.999687087 NA |
| ASV_16s_23837 | 0.081621466 | 0.115556752  | 3.551658648 | 0.352777199 | 0.999827163 NA |
| ASV_16s_23838 | 0.101653733 | -0.215422429 | 3.551513513 | 0.445070694 | 0.999623794 NA |
| ASV_16s_23839 | 0.091255197 | -0.209132219 | 3.551598934 | 0.403974195 | 0.999727704 NA |
| ASV_16s_23840 | 0.121235211 | 0.317351866  | 3.552011193 | 0.301399117 | 0.999898375 NA |
| ASV_16s_23841 | 0.096562434 | 0.663877182  | 3.551716525 | 0.436804641 | 0.999646562 NA |
| ASV_16s_23842 | 0.107265741 | 0.465387662  | 3.551476735 | 0.50392619  | 0.999431978 NA |
| ASV_16s_23843 | 0.097767255 | 8.07E-04     | 3.551646077 | 0.421940034 | 0.9996851 NA   |
| ASV_16s_23844 | 0.103793215 | -0.159553673 | 3.551469523 | 0.463840815 | 0.999568406 NA |
| ASV_16s_23845 | 0.099169638 | -0.112398031 | 3.551726936 | 0.494873191 | 0.999465038 NA |
| ASV_16s_23846 | 0.107416655 | -0.483687593 | 3.551388472 | 0.349971265 | 0.999831745 NA |

|               |             |              |             |             |                 |
|---------------|-------------|--------------|-------------|-------------|-----------------|
| ASV_16s_23847 | 0.097033863 | -0.106260887 | 3.551447998 | 0.45152926  | 0.999605321 NA  |
| ASV_16s_23848 | 0.104334541 | 0.236604436  | 3.551689157 | 0.385637806 | 0.99976692 NA   |
| ASV_16s_23849 | 0.100801515 | -0.053724132 | 3.551414733 | 0.473163096 | 0.999538935 NA  |
| ASV_16s_23850 | 0.088776545 | -0.424000951 | 3.551451036 | 0.326009011 | 0.999867512 NA  |
| ASV_16s_23851 | 0.101168305 | -0.002138479 | 3.55138336  | 0.485442816 | 0.999498057 NA  |
| ASV_16s_23852 | 0.099358015 | 0.00265697   | 3.551488173 | 0.500376922 | 0.9994451 NA    |
| ASV_16s_23853 | 0.101693833 | -0.001968808 | 3.551388418 | 0.485621616 | 0.999497445 NA  |
| ASV_16s_23854 | 0.100877093 | -0.001699238 | 3.551396518 | 0.481854684 | 0.999510247 NA  |
| ASV_16s_23855 | 0.088727445 | 0.001250838  | 3.551491284 | 0.435326086 | 0.999650533 NA  |
| ASV_16s_23856 | 0.114110281 | 0.619671245  | 3.551702158 | 0.369551336 | 0.999797962 NA  |
| ASV_16s_23857 | 0.090910555 | -0.074203557 | 3.551439009 | 0.450260806 | 0.999608997 NA  |
| ASV_16s_23858 | 0.09937697  | 0.049900208  | 3.55136226  | 0.488216094 | 0.999488496 NA  |
| ASV_16s_23859 | 0.09944188  | 0.04990004   | 3.551361511 | 0.488508156 | 0.999487481 NA  |
| ASV_16s_23860 | 0.098497493 | 0.049896549  | 3.551345969 | 0.489610865 | 0.99948364 NA   |
| ASV_16s_23861 | 0.093126795 | 0.050136896  | 3.551408164 | 0.465633799 | 0.999562841 NA  |
| ASV_16s_23862 | 0.087938692 | 0.410967949  | 3.551470279 | 0.441314817 | 0.99963426 NA   |
| ASV_16s_23863 | 0.08220087  | 0.322849475  | 3.55203059  | 0.249624417 | 0.999946395 NA  |
| ASV_16s_23864 | 0.096756181 | 0.18279121   | 3.551096287 | 0.365705599 | 0.999804936 NA  |
| ASV_16s_23865 | 0.103731947 | 0.519295817  | 3.551644553 | 0.434931542 | 0.999651587 NA  |
| ASV_16s_23866 | 0.093183985 | 0.011875632  | 3.551120102 | 0.361004178 | 0.999813234 NA  |
| ASV_16s_23867 | 0.09304641  | 1.025130472  | 3.551724988 | 0.210967272 | 0.999969804 NA  |
| ASV_16s_23868 | 0.11453125  | 0.496922671  | 3.55170917  | 0.296234342 | 0.99990415 NA   |
| ASV_16s_23869 | 0.105550542 | 0.427243954  | 3.551680769 | 0.285106133 | 0.99991581 NA   |
| ASV_16s_23870 | 0.131415483 | 0.295287592  | 3.551832412 | 0.518412567 | 0.99937623 NA   |
| ASV_16s_23871 | 0.131415483 | 0.295287592  | 3.551832412 | 0.518412567 | 0.99937623 NA   |
| ASV_16s_23872 | 0.107890446 | 1.003468465  | 3.551515867 | 0.412473581 | 0.999708078 NA  |
| ASV_16s_23873 | 0.114323573 | 1.110415517  | 3.551551942 | 0.279568706 | 0.999921227 NA  |
| ASV_16s_23874 | 0.102665561 | 0.484098484  | 3.551455213 | 0.536321786 | 0.999302318 NA  |
| ASV_16s_23875 | 0.09805269  | 1.080924603  | 3.55166931  | 0.292556867 | 0.999908119 NA  |
| ASV_16s_23876 | 0.100705435 | 1.188175185  | 3.551553797 | 0.212890655 | 0.999968853 NA  |
| ASV_16s_23877 | 0.085934257 | 0.924319953  | 3.551688764 | 0.363422989 | 0.999808996 NA  |
| ASV_16s_23878 | 0.085934257 | 0.924319953  | 3.551688764 | 0.363422989 | 0.999808996 NA  |
| ASV_16s_23879 | 0.104153743 | 0.991044906  | 3.551542052 | 0.403354401 | 0.999729098 NA  |
| ASV_16s_23880 | 0.094268533 | 1.160474399  | 3.551621153 | 0.203940032 | 0.999973107 NA  |
| ASV_16s_23881 | 0.110211801 | 0.87222144   | 3.551785914 | 0.349866146 | 0.999831915 NA  |
| ASV_16s_23882 | 0.158258381 | -0.216005714 | 3.550870147 | 0.774619525 | 0.997694424 NA  |
| ASV_16s_23883 | 0.096695413 | 0.965055387  | 3.5515981   | 0.386108871 | 0.999765965 NA  |
| ASV_16s_23884 | 0.096695413 | 0.965055387  | 3.5515981   | 0.386108871 | 0.999765965 NA  |
| ASV_16s_23885 | 0.096695413 | 0.965055387  | 3.5515981   | 0.386108871 | 0.999765965 NA  |
| ASV_16s_23886 | 0.096695413 | 0.965055387  | 3.5515981   | 0.386108871 | 0.999765965 NA  |
| ASV_16s_23887 | 0.094176204 | 0.955836059  | 3.551618511 | 0.380532766 | 0.999777103 NA  |
| ASV_16s_23888 | 0.088717918 | 0.935113107  | 3.551665609 | 0.369002887 | 0.999798967 NA  |
| ASV_16s_23889 | 0.088717918 | 0.935113107  | 3.551665609 | 0.369002887 | 0.999798967 NA  |
| ASV_16s_23890 | 0.088717918 | 0.935113107  | 3.551665609 | 0.369002887 | 0.999798967 NA  |
| ASV_16s_23891 | 0.088717918 | 0.935113107  | 3.551665609 | 0.369002887 | 0.999798967 NA  |
| ASV_16s_23892 | 0.088717918 | 0.935113107  | 3.551665609 | 0.369002887 | 0.999798967 NA  |
| ASV_16s_23893 | 0.117978284 | 0.178458057  | 3.55161158  | 0.321580085 | 0.999873489 NA  |
| ASV_16s_23894 | 0.11602508  | 1.23142251   | 3.551454357 | 0.265451209 | 0.999933933 NA  |
| ASV_16s_23895 | 0.084110682 | 0.327769258  | 3.552009135 | 0.382067908 | 0.999774074 NA  |
| ASV_16s_23896 | 0.084110682 | 0.327769258  | 3.552009135 | 0.382067908 | 0.999774074 NA  |
| ASV_16s_23897 | 0.084110682 | 0.327769258  | 3.552009135 | 0.382067908 | 0.999774074 NA  |
| ASV_16s_23898 | 0.104816746 | 0.188888985  | 3.551620323 | 0.35109368  | 0.999829923 NA  |
| ASV_16s_23899 | 0.114901173 | 0.094139128  | 3.551705719 | 0.60350313  | 0.9998972376 NA |
| ASV_16s_23900 | 0.118733985 | 0.338597947  | 3.552027955 | 0.256743601 | 0.999941014 NA  |
| ASV_16s_23901 | 0.147529026 | 0.348845274  | 3.551821056 | 0.574553015 | 0.999125135 NA  |
| ASV_16s_23902 | 0.147529026 | 0.348845274  | 3.551821056 | 0.574553015 | 0.999125135 NA  |
| ASV_16s_23903 | 0.147529026 | 0.348845274  | 3.551821056 | 0.574553015 | 0.999125135 NA  |
| ASV_16s_23904 | 0.147529026 | 0.348845274  | 3.551821056 | 0.574553015 | 0.999125135 NA  |
| ASV_16s_23905 | 0.065180755 | 0.3248967    | 3.552039367 | 0.333426385 | 0.999857068 NA  |
| ASV_16s_23906 | 0.065180755 | 0.3248967    | 3.552039367 | 0.333426385 | 0.999857068 NA  |
| ASV_16s_23907 | 0.088256196 | 0.328919684  | 3.551999863 | 0.392111202 | 0.999753553 NA  |
| ASV_16s_23908 | 0.106672451 | 0.341533085  | 3.552003923 | 0.229031259 | 0.999960025 NA  |
| ASV_16s_23909 | 0.08248696  | -0.059120829 | 3.551562762 | 0.409244981 | 0.999715643 NA  |
| ASV_16s_23910 | 0.118469276 | 0.339376558  | 3.55192179  | 0.477719125 | 0.999524044 NA  |
| ASV_16s_23911 | 0.124398426 | 0.347562665  | 3.551834222 | 0.282456407 | 0.999918433 NA  |
| ASV_16s_23912 | 0.140152792 | -0.250553544 | 3.551638135 | 0.393436775 | 0.999750752 NA  |
| ASV_16s_23913 | 0.123158656 | -0.219934298 | 3.551409468 | 0.652774472 | 0.998672869 NA  |

|               |             |              |             |             |             |    |
|---------------|-------------|--------------|-------------|-------------|-------------|----|
| ASV_16s_23914 | 0.118099059 | 0.331720789  | 3.552049001 | 0.274873295 | 0.999925626 | NA |
| ASV_16s_23915 | 0.102832212 | 0.688887009  | 3.551514268 | 0.281507028 | 0.999919359 | NA |
| ASV_16s_23916 | 0.109060346 | -0.411123004 | 3.551468684 | 0.454600584 | 0.999596323 | NA |
| ASV_16s_23917 | 0.093708616 | -0.365452649 | 3.551602471 | 0.411813172 | 0.999709636 | NA |
| ASV_16s_23918 | 0.093708616 | -0.365452649 | 3.551602471 | 0.411813172 | 0.999709636 | NA |
| ASV_16s_23919 | 0.116354576 | 0.948757756  | 3.551263962 | 0.343174358 | 0.999842494 | NA |
| ASV_16s_23920 | 0.065096751 | -0.258113613 | 3.551818267 | 0.340068932 | 0.999847244 | NA |
| ASV_16s_23921 | 0.065096751 | -0.258113613 | 3.551818267 | 0.340068932 | 0.999847244 | NA |
| ASV_16s_23922 | 0.095763329 | -0.371996718 | 3.551583348 | 0.417247529 | 0.999696639 | NA |
| ASV_16s_23923 | 0.089652068 | -0.352512322 | 3.551637146 | 0.401382711 | 0.999733502 | NA |
| ASV_16s_23924 | 0.085207515 | -0.337688227 | 3.551676992 | 0.39044478  | 0.999757043 | NA |
| ASV_16s_23925 | 0.08891627  | -0.280045227 | 3.551306103 | 0.401830963 | 0.999732505 | NA |
| ASV_16s_23926 | 0.126479289 | 1.059489446  | 3.551403122 | 0.461049698 | 0.999576974 | NA |
| ASV_16s_23927 | 0.117404279 | 1.033244671  | 3.551455093 | 0.436670143 | 0.999646925 | NA |
| ASV_16s_23928 | 0.179246991 | 1.177859136  | 3.55110552  | 0.620879636 | 0.998872584 | NA |
| ASV_16s_23929 | 0.128436113 | 1.064772104  | 3.551391025 | 0.466443299 | 0.999560312 | NA |
| ASV_16s_23930 | 0.128436113 | 1.064772104  | 3.551391025 | 0.466443299 | 0.999560312 | NA |
| ASV_16s_23931 | 0.128436113 | 1.064772104  | 3.551391025 | 0.466443299 | 0.999560312 | NA |
| ASV_16s_23932 | 0.096514178 | 1.010215141  | 3.551361649 | 0.329229198 | 0.999863045 | NA |
| ASV_16s_23933 | 0.096514178 | 1.010215141  | 3.551361649 | 0.329229198 | 0.999863045 | NA |
| ASV_16s_23934 | 0.096514178 | 1.010215141  | 3.551361649 | 0.329229198 | 0.999863045 | NA |
| ASV_16s_23935 | 0.096514178 | 1.010215141  | 3.551361649 | 0.329229198 | 0.999863045 | NA |
| ASV_16s_23936 | 0.050371104 | 0.820227631  | 3.551766947 | 0.199830377 | 0.999974917 | NA |
| ASV_16s_23937 | 0.050371104 | 0.820227631  | 3.551766947 | 0.199830377 | 0.999974917 | NA |
| ASV_16s_23938 | 0.138447797 | 1.128724364  | 3.55108209  | 0.43649822  | 0.999647388 | NA |
| ASV_16s_23939 | 0.086353816 | 0.974786898  | 3.551447863 | 0.308578972 | 0.999889953 | NA |
| ASV_16s_23940 | 0.086353816 | 0.974786898  | 3.551447863 | 0.308578972 | 0.999889953 | NA |
| ASV_16s_23941 | 0.086353816 | 0.974786898  | 3.551447863 | 0.308578972 | 0.999889953 | NA |
| ASV_16s_23942 | 0.109153473 | 0.350426907  | 3.551656715 | 0.388013853 | 0.999762073 | NA |
| ASV_16s_23943 | 0.109153473 | 0.350426907  | 3.551656715 | 0.388013853 | 0.999762073 | NA |
| ASV_16s_23944 | 0.109952412 | -0.085752765 | 3.551191877 | 0.54964104  | 0.999243653 | NA |
| ASV_16s_23945 | 0.089905272 | 0.345195924  | 3.551725956 | 0.336562613 | 0.999852486 | NA |
| ASV_16s_23946 | 0.07421574  | 0.342990683  | 3.551778264 | 0.302410798 | 0.999897216 | NA |
| ASV_16s_23947 | 0.07421574  | 0.342990683  | 3.551778264 | 0.302410798 | 0.999897216 | NA |
| ASV_16s_23948 | 0.07421574  | 0.342990683  | 3.551778264 | 0.302410798 | 0.999897216 | NA |
| ASV_16s_23949 | 0.07421574  | 0.342990683  | 3.551778264 | 0.302410798 | 0.999897216 | NA |
| ASV_16s_23950 | 0.07421574  | 0.342990683  | 3.551778264 | 0.302410798 | 0.999897216 | NA |
| ASV_16s_23951 | 0.137003017 | -0.187184031 | 3.550831396 | 0.67007283  | 0.998555265 | NA |
| ASV_16s_23952 | 0.0802988   | 0.343446632  | 3.551759375 | 0.314682242 | 0.999882422 | NA |
| ASV_16s_23953 | 0.0802988   | 0.343446632  | 3.551759375 | 0.314682242 | 0.999882422 | NA |
| ASV_16s_23954 | 0.0802988   | 0.343446632  | 3.551759375 | 0.314682242 | 0.999882422 | NA |
| ASV_16s_23955 | 0.0802988   | 0.343446632  | 3.551759375 | 0.314682242 | 0.999882422 | NA |
| ASV_16s_23956 | 0.155000535 | 0.371922953  | 3.551421534 | 0.536150056 | 0.999303054 | NA |
| ASV_16s_23957 | 0.027959358 | 0.335452856  | 3.551958004 | 0.1298344   | 0.999994302 | NA |
| ASV_16s_23958 | 0.112648203 | 0.352278362  | 3.551639588 | 0.398150133 | 0.999740616 | NA |
| ASV_16s_23959 | 0.112648203 | 0.352278362  | 3.551639588 | 0.398150133 | 0.999740616 | NA |
| ASV_16s_23960 | 0.08219725  | 0.055691685  | 3.55154916  | 0.435151547 | 0.999651    | NA |
| ASV_16s_23961 | 0.093681598 | -0.401483651 | 3.551226581 | 0.216858854 | 0.999966824 | NA |
| ASV_16s_23962 | 0.110671458 | -0.435065129 | 3.551162246 | 0.394245415 | 0.999749033 | NA |
| ASV_16s_23963 | 0.110671458 | -0.435065129 | 3.551162246 | 0.394245415 | 0.999749033 | NA |
| ASV_16s_23964 | 0.110671458 | -0.435065129 | 3.551162246 | 0.394245415 | 0.999749033 | NA |
| ASV_16s_23965 | 0.110671458 | -0.435065129 | 3.551162246 | 0.394245415 | 0.999749033 | NA |
| ASV_16s_23966 | 0.107609973 | -0.049405908 | 3.551079108 | 0.483546387 | 0.999504525 | NA |
| ASV_16s_23967 | 0.11876824  | -0.452870609 | 3.551088797 | 0.418400934 | 0.99969383  | NA |
| ASV_16s_23968 | 0.142759385 | -0.496905387 | 3.550846305 | 0.496380815 | NA          | NA |
| ASV_16s_23969 | 0.147349806 | -0.502848132 | 3.550799832 | 0.51202612  | NA          | NA |
| ASV_16s_23970 | 0.147349806 | -0.502848132 | 3.550799832 | 0.51202612  | NA          | NA |
| ASV_16s_23971 | 0.136311267 | -0.487059652 | 3.550912053 | 0.474704845 | 0.999533932 | NA |
| ASV_16s_23972 | 0.136311267 | -0.487059652 | 3.550912053 | 0.474704845 | 0.999533932 | NA |
| ASV_16s_23973 | 0.091012448 | -0.229266151 | 3.55115679  | 0.204857311 | 0.999972691 | NA |
| ASV_16s_23974 | 0.11669366  | 0.246393669  | 3.550991605 | 0.557600169 | 0.999207051 | NA |
| ASV_16s_23975 | 0.054791393 | -0.236498834 | 3.551586673 | 0.241379529 | 0.999952188 | NA |
| ASV_16s_23976 | 0.089905272 | -0.379221455 | 3.551325075 | 0.338463436 | 0.99984966  | NA |
| ASV_16s_23977 | 0.112906054 | 1.061552558  | 3.551233438 | 0.36753763  | 0.999801635 | NA |
| ASV_16s_23978 | 0.099037813 | 1.018643682  | 3.551339848 | 0.334755638 | 0.999855138 | NA |
| ASV_16s_23979 | 0.099037813 | 1.018643682  | 3.551339848 | 0.334755638 | 0.999855138 | NA |
| ASV_16s_23980 | 0.099037813 | 1.018643682  | 3.551339848 | 0.334755638 | 0.999855138 | NA |

|               |             |              |             |             |             |    |
|---------------|-------------|--------------|-------------|-------------|-------------|----|
| ASV_16s_23981 | 0.039807391 | 0.761280211  | 3.551828393 | 0.160148906 | 0.999988262 | NA |
| ASV_16s_23982 | 0.039807391 | 0.761280211  | 3.551828393 | 0.160148906 | 0.999988262 | NA |
| ASV_16s_23983 | 0.039807391 | 0.761280211  | 3.551828393 | 0.160148906 | 0.999988262 | NA |
| ASV_16s_23984 | 0.039807391 | 0.761280211  | 3.551828393 | 0.160148906 | 0.999988262 | NA |
| ASV_16s_23985 | 0.098490649 | 1.01683288   | 3.551344501 | 0.333544356 | 0.999856898 | NA |
| ASV_16s_23986 | 0.098490649 | 1.01683288   | 3.551344501 | 0.333544356 | 0.999856898 | NA |
| ASV_16s_23987 | 0.100286432 | 1.101194987  | 3.551538519 | 0.281001349 | 0.999919849 | NA |
| ASV_16s_23988 | 0.089905272 | -0.077586734 | 3.551120999 | 0.55159752  | 0.999234764 | NA |
| ASV_16s_23989 | 0.089905272 | -0.077586734 | 3.551120999 | 0.55159752  | 0.999234764 | NA |
| ASV_16s_23990 | 0.089905272 | -0.077586734 | 3.551120999 | 0.55159752  | 0.999234764 | NA |
| ASV_16s_23991 | 0.089905272 | -0.077586734 | 3.551120999 | 0.55159752  | 0.999234764 | NA |
| ASV_16s_23992 | 0.089905272 | -0.077586734 | 3.551120999 | 0.55159752  | 0.999234764 | NA |
| ASV_16s_23993 | 0.089905272 | -0.077586734 | 3.551120999 | 0.55159752  | 0.999234764 | NA |
| ASV_16s_23994 | 0.089905272 | -0.077586734 | 3.551120999 | 0.55159752  | 0.999234764 | NA |
| ASV_16s_23995 | 0.076663248 | -0.077250053 | 3.55122461  | 0.502183558 | 0.999438447 | NA |
| ASV_16s_23996 | 0.076663248 | -0.077250053 | 3.55122461  | 0.502183558 | 0.999438447 | NA |
| ASV_16s_23997 | 0.076663248 | -0.077250053 | 3.55122461  | 0.502183558 | 0.999438447 | NA |
| ASV_16s_23998 | 0.076663248 | -0.077250053 | 3.55122461  | 0.502183558 | 0.999438447 | NA |
| ASV_16s_23999 | 0.076663248 | -0.077250053 | 3.55122461  | 0.502183558 | 0.999438447 | NA |
| ASV_16s_24000 | 0.076663248 | -0.077250053 | 3.55122461  | 0.502183558 | 0.999438447 | NA |
| ASV_16s_24001 | 0.076663248 | -0.077250053 | 3.55122461  | 0.502183558 | 0.999438447 | NA |
| ASV_16s_24002 | 0.076663248 | -0.077250053 | 3.55122461  | 0.502183558 | 0.999438447 | NA |
| ASV_16s_24003 | 0.076663248 | -0.077250053 | 3.55122461  | 0.502183558 | 0.999438447 | NA |
| ASV_16s_24004 | 0.076663248 | -0.077250053 | 3.55122461  | 0.502183558 | 0.999438447 | NA |
| ASV_16s_24005 | 0.076663248 | -0.077250053 | 3.55122461  | 0.502183558 | 0.999438447 | NA |
| ASV_16s_24006 | 0.076663248 | -0.077250053 | 3.55122461  | 0.502183558 | 0.999438447 | NA |
| ASV_16s_24007 | 0.076663248 | -0.077250053 | 3.55122461  | 0.502183558 | 0.999438447 | NA |
| ASV_16s_24008 | 0.076663248 | -0.077250053 | 3.55122461  | 0.502183558 | 0.999438447 | NA |
| ASV_16s_24009 | 0.076663248 | -0.077250053 | 3.55122461  | 0.502183558 | 0.999438447 | NA |
| ASV_16s_24010 | 0.076663248 | -0.077250053 | 3.55122461  | 0.502183558 | 0.999438447 | NA |
| ASV_16s_24011 | 0.076663248 | -0.077250053 | 3.55122461  | 0.502183558 | 0.999438447 | NA |
| ASV_16s_24012 | 0.076663248 | -0.077250053 | 3.55122461  | 0.502183558 | 0.999438447 | NA |
| ASV_16s_24013 | 0.076663248 | -0.077250053 | 3.55122461  | 0.502183558 | 0.999438447 | NA |
| ASV_16s_24014 | 0.076663248 | -0.077250053 | 3.55122461  | 0.502183558 | 0.999438447 | NA |
| ASV_16s_24015 | 0.076663248 | -0.077250053 | 3.55122461  | 0.502183558 | 0.999438447 | NA |
| ASV_16s_24016 | 0.076663248 | -0.077250053 | 3.55122461  | 0.502183558 | 0.999438447 | NA |
| ASV_16s_24017 | 0.086496543 | -0.077507605 | 3.551144668 | 0.538526182 | 0.99929283  | NA |
| ASV_16s_24018 | 0.086496543 | -0.077507605 | 3.551144668 | 0.538526182 | 0.99929283  | NA |
| ASV_16s_24019 | 0.05024351  | 0.222179195  | 3.551135812 | 0.216470898 | 0.999967026 | NA |
| ASV_16s_24020 | 0.05024351  | 0.222179195  | 3.551135812 | 0.216470898 | 0.999967026 | NA |
| ASV_16s_24021 | 0.053071155 | 0.220958714  | 3.551115701 | 0.232535689 | 0.9999579   | NA |
| ASV_16s_24022 | 0.054197505 | 0.220490397  | 3.551108243 | 0.238840376 | 0.99995388  | NA |
| ASV_16s_24023 | 0.054484977 | 0.220372395  | 3.551106386 | 0.240441414 | 0.999952818 | NA |
| ASV_16s_24024 | 0.054838433 | 0.220331514  | 3.551103306 | 0.24239646  | 0.999951499 | NA |
| ASV_16s_24025 | 0.057073137 | 0.220316007  | 3.551082849 | 0.254628631 | 0.99994265  | NA |
| ASV_16s_24026 | 0.057073137 | 0.220316007  | 3.551082849 | 0.254628631 | 0.99994265  | NA |
| ASV_16s_24027 | 0.056959166 | 0.220316766  | 3.551083854 | 0.254007727 | 0.999943124 | NA |
| ASV_16s_24028 | 0.091763993 | 0.310966888  | 3.551298514 | 0.542276049 | 0.999276488 | NA |
| ASV_16s_24029 | 0.097408528 | 0.31096435   | 3.55125776  | 0.564175237 | 0.999175925 | NA |
| ASV_16s_24030 | 0.097408528 | 0.31096435   | 3.55125776  | 0.564175237 | 0.999175925 | NA |
| ASV_16s_24031 | 0.097408528 | 0.31096435   | 3.55125776  | 0.564175237 | 0.999175925 | NA |
| ASV_16s_24032 | 0.099830802 | 0.513644763  | 3.551165323 | 0.714107317 | 0.998224979 | NA |
| ASV_16s_24033 | 0.099052797 | 0.310963769  | 3.551246757 | 0.570650684 | 0.999144474 | NA |
| ASV_16s_24034 | 0.099052797 | 0.310963769  | 3.551246757 | 0.570650684 | 0.999144474 | NA |
| ASV_16s_24035 | 0.099052797 | 0.310963769  | 3.551246757 | 0.570650684 | 0.999144474 | NA |
| ASV_16s_24036 | 0.099052797 | 0.310963769  | 3.551246757 | 0.570650684 | 0.999144474 | NA |
| ASV_16s_24037 | 0.097100208 | 0.310964481  | 3.551259865 | 0.562965726 | 0.999181712 | NA |
| ASV_16s_24038 | 0.097100208 | 0.310964481  | 3.551259865 | 0.562965726 | 0.999181712 | NA |
| ASV_16s_24039 | 0.097100208 | 0.310964481  | 3.551259865 | 0.562965726 | 0.999181712 | NA |
| ASV_16s_24040 | 0.097100208 | 0.310964481  | 3.551259865 | 0.562965726 | 0.999181712 | NA |
| ASV_16s_24041 | 0.101592456 | 0.686838549  | 3.551205926 | 0.52988083  | 0.999329548 | NA |
| ASV_16s_24042 | 0.101592456 | 0.686838549  | 3.551205926 | 0.52988083  | 0.999329548 | NA |
| ASV_16s_24043 | 0.128162185 | 1.148713641  | 3.55147633  | 0.347404105 | 0.999835863 | NA |
| ASV_16s_24044 | 0.087440842 | -0.061882758 | 3.551328235 | 0.526817547 | 0.999342241 | NA |
| ASV_16s_24045 | 0.109280246 | 0.083006046  | 3.551585788 | 0.412170428 | 0.999708794 | NA |
| ASV_16s_24046 | 0.088696159 | 0.416241032  | 3.551864294 | 0.289958984 | 0.999910854 | NA |
| ASV_16s_24047 | 0.102432547 | 0.282147663  | 3.551137995 | 0.538794293 | 0.99929167  | NA |

|               |             |              |             |             |             |    |
|---------------|-------------|--------------|-------------|-------------|-------------|----|
| ASV_16s_24048 | 0.078285188 | 0.579977304  | 3.551971523 | 0.40548318  | 0.999724287 | NA |
| ASV_16s_24049 | 0.076888587 | -0.392842361 | 3.551636489 | 0.308558769 | 0.999889977 | NA |
| ASV_16s_24050 | 0.090651142 | 0.700747449  | 3.551722689 | 0.436471403 | 0.99964746  | NA |
| ASV_16s_24051 | 0.083104986 | 0.04804652   | 3.551733206 | 0.511632892 | 0.999402762 | NA |
| ASV_16s_24052 | 0.066868333 | 0.787932069  | 3.551857658 | 0.32332519  | 0.999871157 | NA |
| ASV_16s_24053 | 0.070396989 | 0.423291401  | 3.551828769 | 0.398458824 | 0.999739942 | NA |
| ASV_16s_24054 | 0.091735147 | 0.321594978  | 3.551672676 | 0.411225887 | 0.999711018 | NA |
| ASV_16s_24055 | 0.107156736 | 0.480225107  | 3.551729256 | 0.514315385 | 0.999392358 | NA |
| ASV_16s_24056 | 0.065702789 | 0.715769563  | 3.55182928  | 0.360446208 | 0.999814203 | NA |
| ASV_16s_24057 | 0.086279526 | 0.300758778  | 3.551687982 | 0.551694886 | 0.99923432  | NA |
| ASV_16s_24058 | 0.117404279 | 0.296292066  | 3.55187364  | 0.473538209 | 0.999537721 | NA |
| ASV_16s_24059 | 0.117404279 | 0.296292066  | 3.55187364  | 0.473538209 | 0.999537721 | NA |
| ASV_16s_24060 | 0.143251247 | -0.532383854 | 3.551109578 | 0.577143729 | 0.999112134 | NA |
| ASV_16s_24061 | 0.098280559 | 0.855429034  | 3.551615943 | 0.371647659 | 0.999794089 | NA |
| ASV_16s_24062 | 0.098280559 | 0.855429034  | 3.551615943 | 0.371647659 | 0.999794089 | NA |
| ASV_16s_24063 | 0.098280559 | 0.855429034  | 3.551615943 | 0.371647659 | 0.999794089 | NA |
| ASV_16s_24064 | 0.067603034 | 0.288143718  | 3.551859979 | 0.34348387  | 0.999842016 | NA |
| ASV_16s_24065 | 0.067603034 | 0.288143718  | 3.551859979 | 0.34348387  | 0.999842016 | NA |
| ASV_16s_24066 | 0.152417145 | 0.280409607  | 3.551637572 | 0.602596573 | 0.998977413 | NA |
| ASV_16s_24067 | 0.152417145 | 0.280409607  | 3.551637572 | 0.602596573 | 0.998977413 | NA |
| ASV_16s_24068 | 0.064631582 | 0.288914794  | 3.551870188 | 0.332209377 | 0.999858819 | NA |
| ASV_16s_24069 | 0.038380406 | 0.297455897  | 3.551936768 | 0.219716513 | 0.999965307 | NA |
| ASV_16s_24070 | 0.108253481 | 0.283784739  | 3.55172507  | 0.45245869  | 0.999602613 | NA |
| ASV_16s_24071 | 0.065318534 | -0.237071991 | 3.551706536 | 0.336567743 | 0.999852478 | NA |
| ASV_16s_24072 | 0.024818137 | -0.010715697 | 3.55189675  | 0.158984567 | 0.999988553 | NA |
| ASV_16s_24073 | 0.217334665 | 1.065708858  | 3.551026545 | 0.723775872 | 0.99814631  | NA |
| ASV_16s_24074 | 0.175108472 | -0.527479744 | 3.550873563 | 0.679322148 | NA          | NA |
| ASV_16s_24075 | 0.175108472 | -0.527479744 | 3.550873563 | 0.679322148 | NA          | NA |
| ASV_16s_24076 | 0.175108472 | -0.527479744 | 3.550873563 | 0.679322148 | NA          | NA |
| ASV_16s_24077 | 0.175108472 | -0.527479744 | 3.550873563 | 0.679322148 | NA          | NA |
| ASV_16s_24078 | 0.175108472 | -0.527479744 | 3.550873563 | 0.679322148 | NA          | NA |
| ASV_16s_24079 | 0.157369047 | -0.03809431  | 3.551551289 | 0.636277538 | 0.99877889  | NA |
| ASV_16s_24080 | 0.146616653 | -0.545222198 | 3.551468384 | 0.473110607 | 0.999539105 | NA |
| ASV_16s_24081 | 0.14925526  | 0.088768887  | 3.551572707 | 0.587934449 | 0.999056582 | NA |
| ASV_16s_24082 | 0.148499335 | 0.158544267  | 3.55167014  | 0.623006993 | 0.998859937 | NA |
| ASV_16s_24083 | 0.139629622 | 0.339161622  | 3.551608087 | 0.609642839 | 0.998937825 | NA |
| ASV_16s_24084 | 0.167040766 | 0.364327967  | 3.551766599 | 0.512966986 | 0.999397603 | NA |
| ASV_16s_24085 | 0.168233206 | 0.357645283  | 3.551754777 | 0.518258506 | 0.999376842 | NA |
| ASV_16s_24086 | 0.10182624  | -0.414613468 | 3.551238719 | 0.369401753 | 0.999798236 | NA |
| ASV_16s_24087 | 0.112906054 | 1.061552558  | 3.551233438 | 0.36753763  | 0.999801635 | NA |
| ASV_16s_24088 | 0.112906054 | 1.061552558  | 3.551233438 | 0.36753763  | 0.999801635 | NA |
| ASV_16s_24089 | 0.112906054 | 1.061552558  | 3.551233438 | 0.36753763  | 0.999801635 | NA |
| ASV_16s_24090 | 0.112906054 | 1.061552558  | 3.551233438 | 0.36753763  | 0.999801635 | NA |
| ASV_16s_24091 | 0.112906054 | 1.061552558  | 3.551233438 | 0.36753763  | 0.999801635 | NA |
| ASV_16s_24092 | 0.112906054 | 1.061552558  | 3.551233438 | 0.36753763  | 0.999801635 | NA |
| ASV_16s_24093 | 0.064337549 | -0.076801751 | 3.551358859 | 0.450017709 | 0.999609699 | NA |
| ASV_16s_24094 | 0.064337549 | -0.076801751 | 3.551358859 | 0.450017709 | 0.999609699 | NA |
| ASV_16s_24095 | 0.064337549 | -0.076801751 | 3.551358859 | 0.450017709 | 0.999609699 | NA |
| ASV_16s_24096 | 0.064337549 | -0.076801751 | 3.551358859 | 0.450017709 | 0.999609699 | NA |
| ASV_16s_24097 | 0.064337549 | -0.076801751 | 3.551358859 | 0.450017709 | 0.999609699 | NA |
| ASV_16s_24098 | 0.200132542 | -0.028766891 | 3.550925782 | 1.097970834 | 0.99308963  | NA |
| ASV_16s_24099 | 0.13448782  | 0.415807439  | 3.551181853 | 0.967173097 | 0.995340841 | NA |
| ASV_16s_24100 | 0.142015621 | -0.028268264 | 3.551090704 | 0.829989326 | 0.997125721 | NA |
| ASV_16s_24101 | 0.142015621 | -0.028268264 | 3.551090704 | 0.829989326 | 0.997125721 | NA |
| ASV_16s_24102 | 0.142015621 | -0.028268264 | 3.551090704 | 0.829989326 | 0.997125721 | NA |
| ASV_16s_24103 | 0.142015621 | -0.028268264 | 3.551090704 | 0.829989326 | 0.997125721 | NA |
| ASV_16s_24104 | 0.103618521 | 0.435895151  | 3.551402374 | 0.586535425 | 0.999063913 | NA |
| ASV_16s_24105 | 0.111197902 | -0.025849772 | 3.551243543 | 0.696290618 | 0.998364076 | NA |
| ASV_16s_24106 | 0.109973298 | 0.526092946  | 3.551372264 | 0.781291493 | 0.997630225 | NA |
| ASV_16s_24107 | 0.113557429 | 0.601114047  | 3.55139696  | 0.743279188 | 0.997980652 | NA |
| ASV_16s_24108 | 0.084884378 | -0.019081487 | 3.551448735 | 0.590432375 | 0.999043397 | NA |
| ASV_16s_24109 | 0.084884378 | -0.019081487 | 3.551448735 | 0.590432375 | 0.999043397 | NA |
| ASV_16s_24110 | 0.084884378 | -0.019081487 | 3.551448735 | 0.590432375 | 0.999043397 | NA |
| ASV_16s_24111 | 0.084884378 | -0.019081487 | 3.551448735 | 0.590432375 | 0.999043397 | NA |
| ASV_16s_24112 | 0.084884378 | -0.019081487 | 3.551448735 | 0.590432375 | 0.999043397 | NA |
| ASV_16s_24113 | 0.096991205 | -0.07251237  | 3.551133119 | 0.603551058 | 0.998972109 | NA |
| ASV_16s_24114 | 0.096991205 | -0.07251237  | 3.551133119 | 0.603551058 | 0.998972109 | NA |

|               |             |              |             |             |                |
|---------------|-------------|--------------|-------------|-------------|----------------|
| ASV_16s_24115 | 0.096991205 | -0.07251237  | 3.551133119 | 0.603551058 | 0.998972109 NA |
| ASV_16s_24116 | 0.096991205 | -0.07251237  | 3.551133119 | 0.603551058 | 0.998972109 NA |
| ASV_16s_24117 | 0.096991205 | -0.07251237  | 3.551133119 | 0.603551058 | 0.998972109 NA |
| ASV_16s_24118 | 0.070838458 | -0.067680175 | 3.551349845 | 0.505478971 | 0.999426171 NA |
| ASV_16s_24119 | 0.070838458 | -0.067680175 | 3.551349845 | 0.505478971 | 0.999426171 NA |
| ASV_16s_24120 | 0.070838458 | -0.067680175 | 3.551349845 | 0.505478971 | 0.999426171 NA |
| ASV_16s_24121 | 0.070838458 | -0.067680175 | 3.551349845 | 0.505478971 | 0.999426171 NA |
| ASV_16s_24122 | 0.070838458 | -0.067680175 | 3.551349845 | 0.505478971 | 0.999426171 NA |
| ASV_16s_24123 | 0.070838458 | -0.067680175 | 3.551349845 | 0.505478971 | 0.999426171 NA |
| ASV_16s_24124 | 0.089400428 | -0.051620215 | 3.551512293 | 0.559134028 | 0.999199862 NA |
| ASV_16s_24125 | 0.069565609 | -0.066858845 | 3.551363196 | 0.500668242 | 0.999444031 NA |
| ASV_16s_24126 | 0.069565609 | -0.066858845 | 3.551363196 | 0.500668242 | 0.999444031 NA |
| ASV_16s_24127 | 0.069565609 | -0.066858845 | 3.551363196 | 0.500668242 | 0.999444031 NA |
| ASV_16s_24128 | 0.069565609 | -0.066858845 | 3.551363196 | 0.500668242 | 0.999444031 NA |
| ASV_16s_24129 | 0.069565609 | -0.066858845 | 3.551363196 | 0.500668242 | 0.999444031 NA |
| ASV_16s_24130 | 0.069565609 | -0.066858845 | 3.551363196 | 0.500668242 | 0.999444031 NA |
| ASV_16s_24131 | 0.069565609 | -0.066858845 | 3.551363196 | 0.500668242 | 0.999444031 NA |
| ASV_16s_24132 | 0.069565609 | -0.066858845 | 3.551363196 | 0.500668242 | 0.999444031 NA |
| ASV_16s_24133 | 0.069565609 | -0.066858845 | 3.551363196 | 0.500668242 | 0.999444031 NA |
| ASV_16s_24134 | 0.069565609 | -0.066858845 | 3.551363196 | 0.500668242 | 0.999444031 NA |
| ASV_16s_24135 | 0.114396894 | 0.411674497  | 3.551457116 | 0.638569359 | 0.998764514 NA |
| ASV_16s_24136 | 0.117404279 | -0.072887438 | 3.55102628  | 0.687795658 | 0.998427762 NA |
| ASV_16s_24137 | 0.117404279 | -0.072887438 | 3.55102628  | 0.687795658 | 0.998427762 NA |
| ASV_16s_24138 | 0.086314279 | -0.072246545 | 3.551208898 | 0.561934101 | 0.999186625 NA |
| ASV_16s_24139 | 0.086314279 | -0.072246545 | 3.551208898 | 0.561934101 | 0.999186625 NA |
| ASV_16s_24140 | 0.086314279 | -0.072246545 | 3.551208898 | 0.561934101 | 0.999186625 NA |
| ASV_16s_24141 | 0.086314279 | -0.072246545 | 3.551208898 | 0.561934101 | 0.999186625 NA |
| ASV_16s_24142 | 0.096829518 | 0.356691654  | 3.551599601 | 0.623054925 | 0.998859651 NA |
| ASV_16s_24143 | 0.096829518 | 0.356691654  | 3.551599601 | 0.623054925 | 0.998859651 NA |
| ASV_16s_24144 | 0.096829518 | 0.356691654  | 3.551599601 | 0.623054925 | 0.998859651 NA |
| ASV_16s_24145 | 0.096829518 | 0.356691654  | 3.551599601 | 0.623054925 | 0.998859651 NA |
| ASV_16s_24146 | 0.198732362 | 0.360318399  | 3.551105614 | 1.06941756  | 0.993629684 NA |
| ASV_16s_24147 | 0.117035553 | 0.329412672  | 3.551544067 | 0.524251534 | 0.999352748 NA |
| ASV_16s_24148 | 0.253353618 | 0.360351995  | 3.550995797 | 1.328475361 | 0.987662 NA    |
| ASV_16s_24149 | 0.253353618 | 0.360351995  | 3.550995797 | 1.328475361 | 0.987662 NA    |
| ASV_16s_24150 | 0.086078096 | 0.352014968  | 3.551668365 | 0.581373684 | 0.999090629 NA |
| ASV_16s_24151 | 0.086078096 | 0.352014968  | 3.551668365 | 0.581373684 | 0.999090629 NA |
| ASV_16s_24152 | 0.086078096 | 0.352014968  | 3.551668365 | 0.581373684 | 0.999090629 NA |
| ASV_16s_24153 | 0.086078096 | 0.352014968  | 3.551668365 | 0.581373684 | 0.999090629 NA |
| ASV_16s_24154 | 0.086078096 | 0.352014968  | 3.551668365 | 0.581373684 | 0.999090629 NA |
| ASV_16s_24155 | 0.086078096 | 0.352014968  | 3.551668365 | 0.581373684 | 0.999090629 NA |
| ASV_16s_24156 | 0.086078096 | 0.352014968  | 3.551668365 | 0.581373684 | 0.999090629 NA |
| ASV_16s_24157 | 0.086078096 | 0.352014968  | 3.551668365 | 0.581373684 | 0.999090629 NA |
| ASV_16s_24158 | 0.086078096 | 0.352014968  | 3.551668365 | 0.581373684 | 0.999090629 NA |
| ASV_16s_24159 | 0.086078096 | 0.352014968  | 3.551668365 | 0.581373684 | 0.999090629 NA |
| ASV_16s_24160 | 0.086078096 | 0.352014968  | 3.551668365 | 0.581373684 | 0.999090629 NA |
| ASV_16s_24161 | 0.086078096 | 0.352014968  | 3.551668365 | 0.581373684 | 0.999090629 NA |
| ASV_16s_24162 | 0.086078096 | 0.352014968  | 3.551668365 | 0.581373684 | 0.999090629 NA |
| ASV_16s_24163 | 0.086078096 | 0.352014968  | 3.551668365 | 0.581373684 | 0.999090629 NA |
| ASV_16s_24164 | 0.086078096 | 0.352014968  | 3.551668365 | 0.581373684 | 0.999090629 NA |
| ASV_16s_24165 | 0.086078096 | 0.352014968  | 3.551668365 | 0.581373684 | 0.999090629 NA |
| ASV_16s_24166 | 0.086078096 | 0.352014968  | 3.551668365 | 0.581373684 | 0.999090629 NA |
| ASV_16s_24167 | 0.086078096 | 0.352014968  | 3.551668365 | 0.581373684 | 0.999090629 NA |
| ASV_16s_24168 | 0.086078096 | 0.352014968  | 3.551668365 | 0.581373684 | 0.999090629 NA |
| ASV_16s_24169 | 0.086078096 | 0.352014968  | 3.551668365 | 0.581373684 | 0.999090629 NA |
| ASV_16s_24170 | 0.080359433 | 0.406615994  | 3.551664532 | 0.634304778 | 0.998791175 NA |
| ASV_16s_24171 | 0.157753096 | 0.360278271  | 3.551237163 | 0.882539486 | 0.996507563 NA |
| ASV_16s_24172 | 0.111530922 | 0.31594015   | 3.551228793 | 0.643784927 | 0.998731375 NA |
| ASV_16s_24173 | 0.111530922 | 0.31594015   | 3.551228793 | 0.643784927 | 0.998731375 NA |
| ASV_16s_24174 | 0.111530922 | 0.31594015   | 3.551228793 | 0.643784927 | 0.998731375 NA |
| ASV_16s_24175 | 0.111530922 | 0.31594015   | 3.551228793 | 0.643784927 | 0.998731375 NA |
| ASV_16s_24176 | 0.111530922 | 0.31594015   | 3.551228793 | 0.643784927 | 0.998731375 NA |
| ASV_16s_24177 | 0.111530922 | 0.31594015   | 3.551228793 | 0.643784927 | 0.998731375 NA |
| ASV_16s_24178 | 0.111530922 | 0.31594015   | 3.551228793 | 0.643784927 | 0.998731375 NA |
| ASV_16s_24179 | 0.111530922 | 0.31594015   | 3.551228793 | 0.643784927 | 0.998731375 NA |
| ASV_16s_24180 | 0.111530922 | 0.31594015   | 3.551228793 | 0.643784927 | 0.998731375 NA |
| ASV_16s_24181 | 0.111530922 | 0.31594015   | 3.551228793 | 0.643784927 | 0.998731375 NA |

|               |             |             |             |             |             |    |
|---------------|-------------|-------------|-------------|-------------|-------------|----|
| ASV_16s_24182 | 0.102425385 | 0.315940115 | 3.551285225 | 0.606775324 | 0.998954058 | NA |
| ASV_16s_24183 | 0.097872617 | 0.315940403 | 3.551317328 | 0.588714933 | 0.999052476 | NA |
| ASV_16s_24184 | 0.096734424 | 0.315940415 | 3.551325816 | 0.584250567 | 0.999075803 | NA |
| ASV_16s_24185 | 0.096734424 | 0.315940415 | 3.551325816 | 0.584250567 | 0.999075803 | NA |
| ASV_16s_24186 | 0.096406988 | 0.315940418 | 3.551328263 | 0.583006235 | 0.999082236 | NA |
| ASV_16s_24187 | 0.096406988 | 0.315940418 | 3.551328263 | 0.583006235 | 0.999082236 | NA |
| ASV_16s_24188 | 0.096406988 | 0.315940418 | 3.551328263 | 0.583006235 | 0.999082236 | NA |
| ASV_16s_24189 | 0.096406988 | 0.315940418 | 3.551328263 | 0.583006235 | 0.999082236 | NA |
| ASV_16s_24190 | 0.096406988 | 0.315940418 | 3.551328263 | 0.583006235 | 0.999082236 | NA |
| ASV_16s_24191 | 0.096406988 | 0.315940418 | 3.551328263 | 0.583006235 | 0.999082236 | NA |
| ASV_16s_24192 | 0.096406988 | 0.315940418 | 3.551328263 | 0.583006235 | 0.999082236 | NA |
| ASV_16s_24193 | 0.096406988 | 0.315940418 | 3.551328263 | 0.583006235 | 0.999082236 | NA |
| ASV_16s_24194 | 0.092985032 | 0.315940457 | 3.551355205 | 0.569714408 | 0.999149071 | NA |
| ASV_16s_24195 | 0.092985032 | 0.336093086 | 3.551335881 | 0.598764936 | 0.998998518 | NA |
| ASV_16s_24196 | 0.092300641 | 0.315940465 | 3.55136083  | 0.567080549 | 0.999161912 | NA |
| ASV_16s_24197 | 0.149671569 | 0.315939982 | 3.551066546 | 0.807601263 | 0.997365604 | NA |
| ASV_16s_24198 | 0.149671569 | 0.315939982 | 3.551066546 | 0.807601263 | 0.997365604 | NA |
| ASV_16s_24199 | 0.108778839 | 0.315938934 | 3.551244991 | 0.632211971 | 0.998804117 | NA |
| ASV_16s_24200 | 0.10248765  | 0.315940114 | 3.551284935 | 0.606847607 | 0.99895365  | NA |
| ASV_16s_24201 | 0.089905272 | 0.315940495 | 3.551381178 | 0.557929397 | 0.999205511 | NA |
| ASV_16s_24202 | 0.089905272 | 0.315940495 | 3.551381178 | 0.557929397 | 0.999205511 | NA |
| ASV_16s_24203 | 0.089905272 | 0.315940495 | 3.551381178 | 0.557929397 | 0.999205511 | NA |
| ASV_16s_24204 | 0.089905272 | 0.315940495 | 3.551381178 | 0.557929397 | 0.999205511 | NA |
| ASV_16s_24205 | 0.089905272 | 0.315940495 | 3.551381178 | 0.557929397 | 0.999205511 | NA |
| ASV_16s_24206 | 0.089905272 | 0.315940495 | 3.551381178 | 0.557929397 | 0.999205511 | NA |
| ASV_16s_24207 | 0.089905272 | 0.315940495 | 3.551381178 | 0.557929397 | 0.999205511 | NA |
| ASV_16s_24208 | 0.089905272 | 0.315940495 | 3.551381178 | 0.557929397 | 0.999205511 | NA |
| ASV_16s_24209 | 0.089905272 | 0.315940495 | 3.551381178 | 0.557929397 | 0.999205511 | NA |
| ASV_16s_24210 | 0.089905272 | 0.315940495 | 3.551381178 | 0.557929397 | 0.999205511 | NA |
| ASV_16s_24211 | 0.089905272 | 0.315940495 | 3.551381178 | 0.557929397 | 0.999205511 | NA |
| ASV_16s_24212 | 0.089905272 | 0.315940495 | 3.551381178 | 0.557929397 | 0.999205511 | NA |
| ASV_16s_24213 | 0.089905272 | 0.315940495 | 3.551381178 | 0.557929397 | 0.999205511 | NA |
| ASV_16s_24214 | 0.089905272 | 0.315940495 | 3.551381178 | 0.557929397 | 0.999205511 | NA |
| ASV_16s_24215 | 0.089905272 | 0.315940495 | 3.551381178 | 0.557929397 | 0.999205511 | NA |
| ASV_16s_24216 | 0.089905272 | 0.315940495 | 3.551381178 | 0.557929397 | 0.999205511 | NA |
| ASV_16s_24217 | 0.089905272 | 0.315940495 | 3.551381178 | 0.557929397 | 0.999205511 | NA |
| ASV_16s_24218 | 0.089905272 | 0.315940495 | 3.551381178 | 0.557929397 | 0.999205511 | NA |
| ASV_16s_24219 | 0.089905272 | 0.315940495 | 3.551381178 | 0.557929397 | 0.999205511 | NA |
| ASV_16s_24220 | 0.114964494 | 0.315940253 | 3.551210085 | 0.657476784 | 0.998641559 | NA |
| ASV_16s_24221 | 0.102127737 | 0.644652808 | 3.551610006 | 0.588039938 | 0.999056028 | NA |
| ASV_16s_24222 | 0.103020126 | 0.612151938 | 3.550823802 | 0.392030346 | 0.999753723 | NA |
| ASV_16s_24223 | 0.121053052 | 0.595877399 | 3.550777292 | 0.454621205 | 0.999596262 | NA |
| ASV_16s_24224 | 0.154678734 | 0.687541    | 3.550983817 | 0.723487013 | 0.998148693 | NA |
| ASV_16s_24225 | 0.154678734 | 0.687541    | 3.550983817 | 0.723487013 | 0.998148693 | NA |
| ASV_16s_24226 | 0.190300135 | 0.733662336 | 3.551140666 | 0.929233943 | 0.99589077  | NA |
| ASV_16s_24227 | 0.190300135 | 0.733662336 | 3.551140666 | 0.929233943 | 0.99589077  | NA |
| ASV_16s_24228 | 0.145956796 | 1.034550487 | 3.551324069 | 0.558733108 | 0.999201745 | NA |
| ASV_16s_24229 | 0.150298772 | 1.018635921 | 3.551231555 | 0.572079815 | 0.999137426 | NA |
| ASV_16s_24230 | 0.116324972 | 0.939751872 | 3.551520626 | 0.471313515 | 0.999544888 | NA |
| ASV_16s_24231 | 0.140548476 | 0.731043    | 3.551333824 | 0.734525585 | 0.998056166 | NA |
| ASV_16s_24232 | 0.140548476 | 0.731043    | 3.551333824 | 0.734525585 | 0.998056166 | NA |
| ASV_16s_24233 | 0.140548476 | 0.731043    | 3.551333824 | 0.734525585 | 0.998056166 | NA |
| ASV_16s_24234 | 0.140548476 | 0.731043    | 3.551333824 | 0.734525585 | 0.998056166 | NA |
| ASV_16s_24235 | 0.140548476 | 0.731043    | 3.551333824 | 0.734525585 | 0.998056166 | NA |
| ASV_16s_24236 | 0.140548476 | 0.731043    | 3.551333824 | 0.734525585 | 0.998056166 | NA |
| ASV_16s_24237 | 0.140548476 | 0.731043    | 3.551333824 | 0.734525585 | 0.998056166 | NA |
| ASV_16s_24238 | 0.130309863 | 0.729176119 | 3.551388525 | 0.696129041 | 0.998365303 | NA |
| ASV_16s_24239 | 0.123484121 | 0.725981886 | 3.551421243 | 0.670927916 | 0.998549277 | NA |
| ASV_16s_24240 | 0.122346498 | 0.725380436 | 3.551426781 | 0.666766986 | 0.998578257 | NA |
| ASV_16s_24241 | 0.118933627 | 0.72354732  | 3.551443973 | 0.654361581 | 0.998662356 | NA |
| ASV_16s_24242 | 0.118933627 | 0.72354732  | 3.551443973 | 0.654361581 | 0.998662356 | NA |
| ASV_16s_24243 | 0.118933627 | 0.72354732  | 3.551443973 | 0.654361581 | 0.998662356 | NA |
| ASV_16s_24244 | 0.118933627 | 0.72354732  | 3.551443973 | 0.654361581 | 0.998662356 | NA |
| ASV_16s_24245 | 0.118933627 | 0.72354732  | 3.551443973 | 0.654361581 | 0.998662356 | NA |
| ASV_16s_24246 | 0.118933627 | 0.72354732  | 3.551443973 | 0.654361581 | 0.998662356 | NA |
| ASV_16s_24247 | 0.118933627 | 0.72354732  | 3.551443973 | 0.654361581 | 0.998662356 | NA |
| ASV_16s_24248 | 0.118933627 | 0.72354732  | 3.551443973 | 0.654361581 | 0.998662356 | NA |

|               |             |             |             |             |                |
|---------------|-------------|-------------|-------------|-------------|----------------|
| ASV_16s_24249 | 0.118933627 | 0.72354732  | 3.551443973 | 0.654361581 | 0.998662356 NA |
| ASV_16s_24250 | 0.118933627 | 0.72354732  | 3.551443973 | 0.654361581 | 0.998662356 NA |
| ASV_16s_24251 | 0.118933627 | 0.72354732  | 3.551443973 | 0.654361581 | 0.998662356 NA |
| ASV_16s_24252 | 0.118933627 | 0.72354732  | 3.551443973 | 0.654361581 | 0.998662356 NA |
| ASV_16s_24253 | 0.118933627 | 0.72354732  | 3.551443973 | 0.654361581 | 0.998662356 NA |
| ASV_16s_24254 | 0.118933627 | 0.72354732  | 3.551443973 | 0.654361581 | 0.998662356 NA |
| ASV_16s_24255 | 0.118933627 | 0.72354732  | 3.551443973 | 0.654361581 | 0.998662356 NA |
| ASV_16s_24256 | 0.118933627 | 0.72354732  | 3.551443973 | 0.654361581 | 0.998662356 NA |
| ASV_16s_24257 | 0.118933627 | 0.72354732  | 3.551443973 | 0.654361581 | 0.998662356 NA |
| ASV_16s_24258 | 0.118933627 | 0.72354732  | 3.551443973 | 0.654361581 | 0.998662356 NA |
| ASV_16s_24259 | 0.118933627 | 0.72354732  | 3.551443973 | 0.654361581 | 0.998662356 NA |
| ASV_16s_24260 | 0.118933627 | 0.72354732  | 3.551443973 | 0.654361581 | 0.998662356 NA |
| ASV_16s_24261 | 0.118933627 | 0.72354732  | 3.551443973 | 0.654361581 | 0.998662356 NA |
| ASV_16s_24262 | 0.118933627 | 0.72354732  | 3.551443973 | 0.654361581 | 0.998662356 NA |
| ASV_16s_24263 | 0.118933627 | 0.72354732  | 3.551443973 | 0.654361581 | 0.998662356 NA |
| ASV_16s_24264 | 0.118933627 | 0.72354732  | 3.551443973 | 0.654361581 | 0.998662356 NA |
| ASV_16s_24265 | 0.118933627 | 0.72354732  | 3.551443973 | 0.654361581 | 0.998662356 NA |
| ASV_16s_24266 | 0.118933627 | 0.72354732  | 3.551443973 | 0.654361581 | 0.998662356 NA |
| ASV_16s_24267 | 0.118933627 | 0.72354732  | 3.551443973 | 0.654361581 | 0.998662356 NA |
| ASV_16s_24268 | 0.118108385 | 0.849270425 | 3.55156061  | 0.541252708 | 0.999280973 NA |
| ASV_16s_24269 | 0.17780877  | 0.733527049 | 3.551179983 | 0.879282278 | 0.99654818 NA  |
| ASV_16s_24270 | 0.116836015 | 0.847019998 | 3.551370552 | 0.496511065 | 0.999459156 NA |
| ASV_16s_24271 | 0.058914446 | 0.64126611  | 3.551798071 | 0.419957517 | 0.999690011 NA |
| ASV_16s_24272 | 0.058914446 | 0.64126611  | 3.551798071 | 0.419957517 | 0.999690011 NA |
| ASV_16s_24273 | 0.058914446 | 0.64126611  | 3.551798071 | 0.419957517 | 0.999690011 NA |
| ASV_16s_24274 | 0.058914446 | 0.64126611  | 3.551798071 | 0.419957517 | 0.999690011 NA |
| ASV_16s_24275 | 0.058914446 | 0.64126611  | 3.551798071 | 0.419957517 | 0.999690011 NA |
| ASV_16s_24276 | 0.058914446 | 0.64126611  | 3.551798071 | 0.419957517 | 0.999690011 NA |
| ASV_16s_24277 | 0.058914446 | 0.64126611  | 3.551798071 | 0.419957517 | 0.999690011 NA |
| ASV_16s_24278 | 0.058914446 | 0.64126611  | 3.551798071 | 0.419957517 | 0.999690011 NA |
| ASV_16s_24279 | 0.058914446 | 0.64126611  | 3.551798071 | 0.419957517 | 0.999690011 NA |
| ASV_16s_24280 | 0.058914446 | 0.64126611  | 3.551798071 | 0.419957517 | 0.999690011 NA |
| ASV_16s_24281 | 0.058914446 | 0.64126611  | 3.551798071 | 0.419957517 | 0.999690011 NA |
| ASV_16s_24282 | 0.058914446 | 0.64126611  | 3.551798071 | 0.419957517 | 0.999690011 NA |
| ASV_16s_24283 | 0.11056974  | 0.691903986 | 3.551220285 | 0.585207284 | 0.999070837 NA |
| ASV_16s_24284 | 0.11056974  | 0.691903986 | 3.551220285 | 0.585207284 | 0.999070837 NA |
| ASV_16s_24285 | 0.11056974  | 0.691903986 | 3.551220285 | 0.585207284 | 0.999070837 NA |
| ASV_16s_24286 | 0.11056974  | 0.691903986 | 3.551220285 | 0.585207284 | 0.999070837 NA |
| ASV_16s_24287 | 0.11056974  | 0.691903986 | 3.551220285 | 0.585207284 | 0.999070837 NA |
| ASV_16s_24288 | 0.11056974  | 0.691903986 | 3.551220285 | 0.585207284 | 0.999070837 NA |
| ASV_16s_24289 | 0.11056974  | 0.691903986 | 3.551220285 | 0.585207284 | 0.999070837 NA |
| ASV_16s_24290 | 0.11056974  | 0.691903986 | 3.551220285 | 0.585207284 | 0.999070837 NA |
| ASV_16s_24291 | 0.11056974  | 0.691903986 | 3.551220285 | 0.585207284 | 0.999070837 NA |
| ASV_16s_24292 | 0.11056974  | 0.691903986 | 3.551220285 | 0.585207284 | 0.999070837 NA |
| ASV_16s_24293 | 0.11056974  | 0.691903986 | 3.551220285 | 0.585207284 | 0.999070837 NA |
| ASV_16s_24294 | 0.111560484 | 0.69192383  | 3.551214418 | 0.588665555 | 0.999052736 NA |
| ASV_16s_24295 | 0.11849295  | 0.692044141 | 3.55117609  | 0.613149405 | 0.998917746 NA |
| ASV_16s_24296 | 0.111725608 | 0.691927104 | 3.55121345  | 0.589243141 | 0.99904969 NA  |
| ASV_16s_24297 | 0.112055855 | 0.691933623 | 3.551211522 | 0.590399319 | 0.999043573 NA |
| ASV_16s_24298 | 0.121762827 | 0.692100178 | 3.551159504 | 0.624887929 | 0.998848676 NA |
| ASV_16s_24299 | 0.113707095 | 0.69196566  | 3.55120205  | 0.596200205 | 0.999012479 NA |
| ASV_16s_24300 | 0.113707095 | 0.69196566  | 3.55120205  | 0.596200205 | 0.999012479 NA |
| ASV_16s_24301 | 0.113707095 | 0.69196566  | 3.55120205  | 0.596200205 | 0.999012479 NA |
| ASV_16s_24302 | 0.113707095 | 0.69196566  | 3.55120205  | 0.596200205 | 0.999012479 NA |
| ASV_16s_24303 | 0.113707095 | 0.69196566  | 3.55120205  | 0.596200205 | 0.999012479 NA |
| ASV_16s_24304 | 0.113707095 | 0.69196566  | 3.55120205  | 0.596200205 | 0.999012479 NA |
| ASV_16s_24305 | 0.113707095 | 0.69196566  | 3.55120205  | 0.596200205 | 0.999012479 NA |
| ASV_16s_24306 | 0.113707095 | 0.69196566  | 3.55120205  | 0.596200205 | 0.999012479 NA |
| ASV_16s_24307 | 0.113707095 | 0.69196566  | 3.55120205  | 0.596200205 | 0.999012479 NA |
| ASV_16s_24308 | 0.113707095 | 0.69196566  | 3.55120205  | 0.596200205 | 0.999012479 NA |
| ASV_16s_24309 | 0.113707095 | 0.69196566  | 3.55120205  | 0.596200205 | 0.999012479 NA |
| ASV_16s_24310 | 0.113707095 | 0.69196566  | 3.55120205  | 0.596200205 | 0.999012479 NA |
| ASV_16s_24311 | 0.113707095 | 0.69196566  | 3.55120205  | 0.596200205 | 0.999012479 NA |
| ASV_16s_24312 | 0.098674364 | 0.690827713 | 3.551298207 | 0.544541341 | 0.999266494 NA |
| ASV_16s_24313 | 0.089905272 | 0.688503329 | 3.55136519  | 0.515822123 | 0.99938646 NA  |
| ASV_16s_24314 | 0.089905272 | 0.688503329 | 3.55136519  | 0.515822123 | 0.99938646 NA  |
| ASV_16s_24315 | 0.089905272 | 0.688503329 | 3.55136519  | 0.515822123 | 0.99938646 NA  |





|               |             |              |             |             |             |    |
|---------------|-------------|--------------|-------------|-------------|-------------|----|
| ASV_16s_24383 | 0.073433188 | 0.304133778  | 3.551956633 | 0.348200065 | 0.999834594 | NA |
| ASV_16s_24384 | 0.073433188 | 0.304133778  | 3.551956633 | 0.348200065 | 0.999834594 | NA |
| ASV_16s_24385 | 0.073433188 | 0.304133778  | 3.551956633 | 0.348200065 | 0.999834594 | NA |
| ASV_16s_24386 | 0.073433188 | 0.304133778  | 3.551956633 | 0.348200065 | 0.999834594 | NA |
| ASV_16s_24387 | 0.073433188 | 0.304133778  | 3.551956633 | 0.348200065 | 0.999834594 | NA |
| ASV_16s_24388 | 0.073433188 | 0.304133778  | 3.551956633 | 0.348200065 | 0.999834594 | NA |
| ASV_16s_24389 | 0.073433188 | 0.304133778  | 3.551956633 | 0.348200065 | 0.999834594 | NA |
| ASV_16s_24390 | 0.073433188 | 0.304133778  | 3.551956633 | 0.348200065 | 0.999834594 | NA |
| ASV_16s_24391 | 0.073433188 | 0.304133778  | 3.551956633 | 0.348200065 | 0.999834594 | NA |
| ASV_16s_24392 | 0.073433188 | 0.304133778  | 3.551956633 | 0.348200065 | 0.999834594 | NA |
| ASV_16s_24393 | 0.073433188 | 0.304133778  | 3.551956633 | 0.348200065 | 0.999834594 | NA |
| ASV_16s_24394 | 0.073433188 | 0.304133778  | 3.551956633 | 0.348200065 | 0.999834594 | NA |
| ASV_16s_24395 | 0.073433188 | 0.304133778  | 3.551956633 | 0.348200065 | 0.999834594 | NA |
| ASV_16s_24396 | 0.073433188 | 0.304133778  | 3.551956633 | 0.348200065 | 0.999834594 | NA |
| ASV_16s_24397 | 0.073433188 | 0.304133778  | 3.551956633 | 0.348200065 | 0.999834594 | NA |
| ASV_16s_24398 | 0.073433188 | 0.304133778  | 3.551956633 | 0.348200065 | 0.999834594 | NA |
| ASV_16s_24399 | 0.073433188 | 0.304133778  | 3.551956633 | 0.348200065 | 0.999834594 | NA |
| ASV_16s_24400 | 0.073450301 | 0.167711794  | 3.551899487 | 0.401764192 | 0.999732654 | NA |
| ASV_16s_24401 | 0.078084842 | 0.153514085  | 3.551889181 | 0.425801119 | 0.999675382 | NA |
| ASV_16s_24402 | 0.073461709 | 0.091423251  | 3.551860449 | 0.427488632 | 0.999671071 | NA |
| ASV_16s_24403 | 0.073461709 | 0.091423251  | 3.551860449 | 0.427488632 | 0.999671071 | NA |
| ASV_16s_24404 | 0.073467413 | 0.056572307  | 3.551844314 | 0.437011694 | 0.999646004 | NA |
| ASV_16s_24405 | 0.073467413 | 0.056572307  | 3.551844314 | 0.437011694 | 0.999646004 | NA |
| ASV_16s_24406 | 0.074986701 | 0.045191737  | 3.551836679 | 0.443772902 | 0.999627433 | NA |
| ASV_16s_24407 | 0.088433383 | -0.057520144 | 3.551719324 | 0.515048324 | 0.999389494 | NA |
| ASV_16s_24408 | 0.07524562  | 0.010693209  | 3.551816443 | 0.451827638 | 0.999604453 | NA |
| ASV_16s_24409 | 0.07524562  | 0.010693209  | 3.551816443 | 0.451827638 | 0.999604453 | NA |
| ASV_16s_24410 | 0.084287047 | -0.046857714 | 3.551741208 | 0.494013879 | 0.999468106 | NA |
| ASV_16s_24411 | 0.07524562  | 0.010693209  | 3.551816443 | 0.451827638 | 0.999604453 | NA |
| ASV_16s_24412 | 0.073478821 | -0.009046822 | 3.551811603 | 0.448669771 | 0.999613575 | NA |
| ASV_16s_24413 | 0.074744895 | -0.01743529  | 3.551803042 | 0.453989521 | 0.999598124 | NA |
| ASV_16s_24414 | 0.075504539 | -0.02238117  | 3.551798038 | 0.457234209 | 0.999588496 | NA |
| ASV_16s_24415 | 0.075504539 | -0.02238117  | 3.551798038 | 0.457234209 | 0.999588496 | NA |
| ASV_16s_24416 | 0.073478821 | -0.009046822 | 3.551811603 | 0.448669771 | 0.999613575 | NA |
| ASV_16s_24417 | 0.075504539 | -0.02238117  | 3.551798038 | 0.457234209 | 0.999588496 | NA |
| ASV_16s_24418 | 0.075763458 | -0.05423994  | 3.551781751 | 0.460075238 | 0.999579937 | NA |
| ASV_16s_24419 | 0.075763458 | -0.05423994  | 3.551781751 | 0.460075238 | 0.999579937 | NA |
| ASV_16s_24420 | 0.075763458 | -0.05423994  | 3.551781751 | 0.460075238 | 0.999579937 | NA |
| ASV_16s_24421 | 0.073484525 | -0.040142966 | 3.551795931 | 0.450712617 | 0.99960769  | NA |
| ASV_16s_24422 | 0.082636792 | -0.095156978 | 3.551714049 | 0.489860456 | 0.999482768 | NA |
| ASV_16s_24423 | 0.074756303 | -0.077891048 | 3.551773638 | 0.45512925  | 0.99959476  | NA |
| ASV_16s_24424 | 0.074503088 | -0.076370054 | 3.551775516 | 0.454126464 | 0.999597721 | NA |
| ASV_16s_24425 | 0.073490229 | -0.070335864 | 3.551782063 | 0.450148532 | 0.999609321 | NA |
| ASV_16s_24426 | 0.076022377 | -0.085526279 | 3.551763246 | 0.460194087 | 0.999579576 | NA |
| ASV_16s_24427 | 0.076281296 | -0.116457054 | 3.551742035 | 0.457823492 | 0.99958673  | NA |
| ASV_16s_24428 | 0.076281296 | -0.116457054 | 3.551742035 | 0.457823492 | 0.99958673  | NA |
| ASV_16s_24429 | 0.073495933 | -0.100045642 | 3.551767351 | 0.447194117 | 0.999617787 | NA |
| ASV_16s_24430 | 0.076281296 | -0.116457054 | 3.551742035 | 0.457823492 | 0.99958673  | NA |
| ASV_16s_24431 | 0.087405262 | -0.20142324  | 3.551609925 | 0.495474183 | 0.999462885 | NA |
| ASV_16s_24432 | 0.076799133 | -0.176551925 | 3.551703134 | 0.445295751 | 0.999623161 | NA |
| ASV_16s_24433 | 0.073507341 | -0.158726513 | 3.55173292  | 0.433818398 | 0.99965455  | NA |
| ASV_16s_24434 | 0.026251481 | -0.026931901 | 3.551915182 | 0.172374916 | 0.999984887 | NA |
| ASV_16s_24435 | 0.026251481 | -0.026931901 | 3.551915182 | 0.172374916 | 0.999984887 | NA |
| ASV_16s_24436 | 0.026251481 | -0.026931901 | 3.551915182 | 0.172374916 | 0.999984887 | NA |
| ASV_16s_24437 | 0.026251481 | -0.026931901 | 3.551915182 | 0.172374916 | 0.999984887 | NA |
| ASV_16s_24438 | 0.026251481 | -0.026931901 | 3.551915182 | 0.172374916 | 0.999984887 | NA |
| ASV_16s_24439 | 0.026251481 | -0.026931901 | 3.551915182 | 0.172374916 | 0.999984887 | NA |
| ASV_16s_24440 | 0.124574027 | -0.484496219 | 3.551232842 | 0.51469991  | 0.999390856 | NA |
| ASV_16s_24441 | 0.124574027 | -0.484496219 | 3.551232842 | 0.51469991  | 0.999390856 | NA |
| ASV_16s_24442 | 0.111025132 | -0.445230867 | 3.551339667 | 0.468128062 | 0.99955018  | NA |
| ASV_16s_24443 | 0.109670243 | -0.441070077 | 3.551351439 | 0.463662743 | 0.999568957 | NA |
| ASV_16s_24444 | 0.100186016 | -0.410648419 | 3.551439523 | 0.433522371 | 0.999655335 | NA |
| ASV_16s_24445 | 0.100186016 | -0.410648419 | 3.551439523 | 0.433522371 | 0.999655335 | NA |
| ASV_16s_24446 | 0.100186016 | -0.410648419 | 3.551439523 | 0.433522371 | 0.999655335 | NA |
| ASV_16s_24447 | 0.100186016 | -0.410648419 | 3.551439523 | 0.433522371 | 0.999655335 | NA |
| ASV_16s_24448 | 0.100186016 | -0.410648419 | 3.551439523 | 0.433522371 | 0.999655335 | NA |
| ASV_16s_24449 | 0.100186016 | -0.410648419 | 3.551439523 | 0.433522371 | 0.999655335 | NA |

|               |             |              |             |             |             |    |
|---------------|-------------|--------------|-------------|-------------|-------------|----|
| ASV_16s_24450 | 0.100186016 | -0.410648419 | 3.551439523 | 0.433522371 | 0.999655335 | NA |
| ASV_16s_24451 | 0.100186016 | -0.410648419 | 3.551439523 | 0.433522371 | 0.999655335 | NA |
| ASV_16s_24452 | 0.100186016 | -0.410648419 | 3.551439523 | 0.433522371 | 0.999655335 | NA |
| ASV_16s_24453 | 0.100186016 | -0.410648419 | 3.551439523 | 0.433522371 | 0.999655335 | NA |
| ASV_16s_24454 | 0.097867788 | -0.402987254 | 3.551460373 | 0.426448709 | 0.999673732 | NA |
| ASV_16s_24455 | 0.096940497 | -0.399877332 | 3.55146892  | 0.423655824 | 0.999680806 | NA |
| ASV_16s_24456 | 0.096013206 | -0.396688636 | 3.551477317 | 0.420870974 | 0.999687755 | NA |
| ASV_16s_24457 | 0.095549561 | -0.395042729 | 3.551481335 | 0.41948206  | 0.999691181 | NA |
| ASV_16s_24458 | 0.101289527 | -0.414265227 | 3.551429456 | 0.436929451 | 0.999646226 | NA |
| ASV_16s_24459 | 0.101927301 | -0.416377377 | 3.551423168 | 0.438915096 | 0.999640842 | NA |
| ASV_16s_24460 | 0.095549561 | -0.395042729 | 3.551481335 | 0.41948206  | 0.999691181 | NA |
| ASV_16s_24461 | 0.103320328 | -0.42094971  | 3.551409642 | 0.443281557 | 0.999628805 | NA |
| ASV_16s_24462 | 0.103320328 | -0.42094971  | 3.551409642 | 0.443281557 | 0.999628805 | NA |
| ASV_16s_24463 | 0.103320328 | -0.42094971  | 3.551409642 | 0.443281557 | 0.999628805 | NA |
| ASV_16s_24464 | 0.103320328 | -0.42094971  | 3.551409642 | 0.443281557 | 0.999628805 | NA |
| ASV_16s_24465 | 0.098218136 | -0.404150327 | 3.55145719  | 0.427501915 | 0.999671036 | NA |
| ASV_16s_24466 | 0.091840396 | -0.381617175 | 3.551514538 | 0.408576789 | 0.999717192 | NA |
| ASV_16s_24467 | 0.091840396 | -0.381617175 | 3.551514538 | 0.408576789 | 0.999717192 | NA |
| ASV_16s_24468 | 0.091840396 | -0.381617175 | 3.551514538 | 0.408576789 | 0.999717192 | NA |
| ASV_16s_24469 | 0.091840396 | -0.381617175 | 3.551514538 | 0.408576789 | 0.999717192 | NA |
| ASV_16s_24470 | 0.091840396 | -0.381617175 | 3.551514538 | 0.408576789 | 0.999717192 | NA |
| ASV_16s_24471 | 0.091840396 | -0.381617175 | 3.551514538 | 0.408576789 | 0.999717192 | NA |
| ASV_16s_24472 | 0.091840396 | -0.381617175 | 3.551514538 | 0.408576789 | 0.999717192 | NA |
| ASV_16s_24473 | 0.091840396 | -0.381617175 | 3.551514538 | 0.408576789 | 0.999717192 | NA |
| ASV_16s_24474 | 0.091840396 | -0.381617175 | 3.551514538 | 0.408576789 | 0.999717192 | NA |
| ASV_16s_24475 | 0.091840396 | -0.381617175 | 3.551514538 | 0.408576789 | 0.999717192 | NA |
| ASV_16s_24476 | 0.101343112 | -0.414443774 | 3.551428922 | 0.43709845  | 0.99964577  | NA |
| ASV_16s_24477 | 0.101343112 | -0.414443774 | 3.551428922 | 0.43709845  | 0.99964577  | NA |
| ASV_16s_24478 | 0.080676992 | -0.337445639 | 3.551603927 | 0.377745723 | 0.999782531 | NA |
| ASV_16s_24479 | 0.078093727 | -0.326274865 | 3.551624072 | 0.371138525 | 0.999795034 | NA |
| ASV_16s_24480 | 0.078093727 | -0.326274865 | 3.551624072 | 0.371138525 | 0.999795034 | NA |
| ASV_16s_24481 | 0.078093727 | -0.326274865 | 3.551624072 | 0.371138525 | 0.999795034 | NA |
| ASV_16s_24482 | 0.078093727 | -0.326274865 | 3.551624072 | 0.371138525 | 0.999795034 | NA |
| ASV_16s_24483 | 0.078093727 | -0.326274865 | 3.551624072 | 0.371138525 | 0.999795034 | NA |
| ASV_16s_24484 | 0.078093727 | -0.326274865 | 3.551624072 | 0.371138525 | 0.999795034 | NA |
| ASV_16s_24485 | 0.078093727 | -0.326274865 | 3.551624072 | 0.371138525 | 0.999795034 | NA |
| ASV_16s_24486 | 0.078093727 | -0.326274865 | 3.551624072 | 0.371138525 | 0.999795034 | NA |
| ASV_16s_24487 | 0.078093727 | -0.326274865 | 3.551624072 | 0.371138525 | 0.999795034 | NA |
| ASV_16s_24488 | 0.078093727 | -0.326274865 | 3.551624072 | 0.371138525 | 0.999795034 | NA |
| ASV_16s_24489 | 0.078093727 | -0.326274865 | 3.551624072 | 0.371138525 | 0.999795034 | NA |
| ASV_16s_24490 | 0.078093727 | -0.326274865 | 3.551624072 | 0.371138525 | 0.999795034 | NA |
| ASV_16s_24491 | 0.078093727 | -0.326274865 | 3.551624072 | 0.371138525 | 0.999795034 | NA |
| ASV_16s_24492 | 0.078093727 | -0.326274865 | 3.551624072 | 0.371138525 | 0.999795034 | NA |
| ASV_16s_24493 | 0.078093727 | -0.326274865 | 3.551624072 | 0.371138525 | 0.999795034 | NA |
| ASV_16s_24494 | 0.078093727 | -0.326274865 | 3.551624072 | 0.371138525 | 0.999795034 | NA |
| ASV_16s_24495 | 0.089397524 | -0.372426177 | 3.55153772  | 0.401505909 | 0.999733228 | NA |
| ASV_16s_24496 | 0.076321224 | -0.318408659 | 3.55163849  | 0.366727227 | 0.9998031   | NA |
| ASV_16s_24497 | 0.076321224 | -0.318408659 | 3.55163849  | 0.366727227 | 0.9998031   | NA |
| ASV_16s_24498 | 0.076068009 | -0.317272386 | 3.551640589 | 0.366106558 | 0.999804217 | NA |
| ASV_16s_24499 | 0.07556158  | -0.314990205 | 3.551644817 | 0.364872493 | 0.999806425 | NA |
| ASV_16s_24500 | 0.075308365 | -0.313844251 | 3.551646946 | 0.364259127 | 0.999807516 | NA |
| ASV_16s_24501 | 0.075308365 | -0.313844251 | 3.551646946 | 0.364259127 | 0.999807516 | NA |
| ASV_16s_24502 | 0.073535862 | -0.305914742 | 3.551659923 | 0.360030496 | 0.999814922 | NA |
| ASV_16s_24503 | 0.073535862 | -0.305914742 | 3.551659923 | 0.360030496 | 0.999814922 | NA |
| ASV_16s_24504 | 0.073535862 | -0.305914742 | 3.551659923 | 0.360030496 | 0.999814922 | NA |
| ASV_16s_24505 | 0.073535862 | -0.305914742 | 3.551659923 | 0.360030496 | 0.999814922 | NA |
| ASV_16s_24506 | 0.073535862 | -0.305914742 | 3.551659923 | 0.360030496 | 0.999814922 | NA |
| ASV_16s_24507 | 0.073535862 | -0.305914742 | 3.551659923 | 0.360030496 | 0.999814922 | NA |
| ASV_16s_24508 | 0.073535862 | -0.305914742 | 3.551659923 | 0.360030496 | 0.999814922 | NA |
| ASV_16s_24509 | 0.073535862 | -0.305914742 | 3.551659923 | 0.360030496 | 0.999814922 | NA |
| ASV_16s_24510 | 0.073535862 | -0.305914742 | 3.551659923 | 0.360030496 | 0.999814922 | NA |
| ASV_16s_24511 | 0.073535862 | -0.305914742 | 3.551659923 | 0.360030496 | 0.999814922 | NA |
| ASV_16s_24512 | 0.073535862 | -0.305914742 | 3.551659923 | 0.360030496 | 0.999814922 | NA |
| ASV_16s_24513 | 0.073535862 | -0.305914742 | 3.551659923 | 0.360030496 | 0.999814922 | NA |
| ASV_16s_24514 | 0.073535862 | -0.305914742 | 3.551659923 | 0.360030496 | 0.999814922 | NA |
| ASV_16s_24515 | 0.073535862 | -0.305914742 | 3.551659923 | 0.360030496 | 0.999814922 | NA |
| ASV_16s_24516 | 0.073535862 | -0.305914742 | 3.551659923 | 0.360030496 | 0.999814922 | NA |

|               |             |              |             |             |             |    |
|---------------|-------------|--------------|-------------|-------------|-------------|----|
| ASV_16s_24517 | 0.073535862 | -0.305914742 | 3.551659923 | 0.360030496 | 0.999814922 | NA |
| ASV_16s_24518 | 0.073535862 | -0.305914742 | 3.551659923 | 0.360030496 | 0.999814922 | NA |
| ASV_16s_24519 | 0.073535862 | -0.305914742 | 3.551659923 | 0.360030496 | 0.999814922 | NA |
| ASV_16s_24520 | 0.073535862 | -0.305914742 | 3.551659923 | 0.360030496 | 0.999814922 | NA |
| ASV_16s_24521 | 0.073535862 | -0.305914742 | 3.551659923 | 0.360030496 | 0.999814922 | NA |
| ASV_16s_24522 | 0.073535862 | -0.305914742 | 3.551659923 | 0.360030496 | 0.999814922 | NA |
| ASV_16s_24523 | 0.073535862 | -0.305914742 | 3.551659923 | 0.360030496 | 0.999814922 | NA |
| ASV_16s_24524 | 0.073535862 | -0.305914742 | 3.551659923 | 0.360030496 | 0.999814922 | NA |
| ASV_16s_24525 | 0.073535862 | -0.305914742 | 3.551659923 | 0.360030496 | 0.999814922 | NA |
| ASV_16s_24526 | 0.073535862 | -0.305914742 | 3.551659923 | 0.360030496 | 0.999814922 | NA |
| ASV_16s_24527 | 0.073535862 | -0.305914742 | 3.551659923 | 0.360030496 | 0.999814922 | NA |
| ASV_16s_24528 | 0.073535862 | -0.305914742 | 3.551659923 | 0.360030496 | 0.999814922 | NA |
| ASV_16s_24529 | 0.073535862 | -0.305914742 | 3.551659923 | 0.360030496 | 0.999814922 | NA |
| ASV_16s_24530 | 0.112005116 | -0.448244787 | 3.551331196 | 0.471438002 | 0.999544489 | NA |
| ASV_16s_24531 | 0.112005116 | -0.448244787 | 3.551331196 | 0.471438002 | 0.999544489 | NA |
| ASV_16s_24532 | 0.023428996 | -0.123011665 | 3.551380687 | 0.06746393  | 0.9999994   | NA |
| ASV_16s_24533 | 0.029583552 | 0.122748178  | 3.551288831 | 0.142729395 | 0.999992103 | NA |
| ASV_16s_24534 | 0.020781691 | -0.108144338 | 3.551430714 | 0.049147225 | 0.999999804 | NA |
| ASV_16s_24535 | 0.020781691 | -0.108144338 | 3.551430714 | 0.049147225 | 0.999999804 | NA |
| ASV_16s_24536 | 0.016285074 | -0.073176688 | 3.551517741 | 0.018497631 | 0.999999994 | NA |
| ASV_16s_24537 | 0.03266083  | 0.231778429  | 3.551333682 | 0.109710068 | 0.999996815 | NA |
| ASV_16s_24538 | 0.03266083  | 0.231778429  | 3.551333682 | 0.109710068 | 0.999996815 | NA |
| ASV_16s_24541 | 0.114681839 | 0.595847123  | 3.55078993  | 0.428592778 | 0.999668229 | NA |
| ASV_16s_24542 | 0.114681839 | 0.595847123  | 3.55078993  | 0.428592778 | 0.999668229 | NA |
| ASV_16s_24543 | 0.052033265 | 0.595119615  | 3.551076388 | 0.187375994 | 0.999979878 | NA |
| ASV_16s_24544 | 0.052033265 | 0.595119615  | 3.551076388 | 0.187375994 | 0.999979878 | NA |
| ASV_16s_24545 | 0.103320328 | 0.686880752  | 3.551195287 | 0.530403386 | 0.999327366 | NA |
| ASV_16s_24546 | 0.127141143 | -0.4661595   | 3.551317594 | 0.483820166 | 0.999503595 | NA |
| ASV_16s_24547 | 0.081428217 | 0.295895131  | 3.551921989 | 0.380643919 | 0.999776885 | NA |
| ASV_16s_24548 | 0.08400119  | -0.211956947 | 3.551773459 | 0.355488624 | 0.999822655 | NA |
| ASV_16s_24549 | 0.111459675 | -0.383020311 | 3.551554771 | 0.423382672 | 0.999681492 | NA |
| ASV_16s_24550 | 0.099696756 | -0.303409844 | 3.551687961 | 0.307112898 | 0.99989171  | NA |
| ASV_16s_24551 | 0.087791816 | 0.538361729  | 3.551994505 | 0.36040392  | 0.999814276 | NA |
| ASV_16s_24552 | 0.10025406  | -0.323905601 | 3.55164625  | 0.39045765  | 0.999757016 | NA |
| ASV_16s_24553 | 0.096346279 | -0.305886233 | 3.551678611 | 0.377468457 | 0.999783066 | NA |
| ASV_16s_24554 | 0.0888344   | -0.031509933 | 3.551747749 | 0.346565971 | 0.999837192 | NA |
| ASV_16s_24555 | 0.083135882 | -0.009872356 | 3.551772711 | 0.3307017   | 0.999860968 | NA |
| ASV_16s_24556 | 0.080060307 | -0.014019791 | 3.551746935 | 0.340480951 | 0.999846619 | NA |
| ASV_16s_24557 | 0.074403778 | 0.909321264  | 3.551594634 | 0.220392475 | 0.999964941 | NA |
| ASV_16s_24558 | 0.084862963 | 0.58790716   | 3.551986864 | 0.358572986 | 0.999817428 | NA |
| ASV_16s_24559 | 0.102363794 | -0.286582198 | 3.551689825 | 0.30465796  | 0.99989461  | NA |
| ASV_16s_24560 | 0.095339009 | -0.2686908   | 3.551694475 | 0.384156651 | 0.999769907 | NA |
| ASV_16s_24561 | 0.095716798 | -0.280221974 | 3.551679694 | 0.384940253 | 0.99976833  | NA |
| ASV_16s_24562 | 0.079502069 | 0.0836763    | 3.55174839  | 0.24832967  | 0.999947336 | NA |
| ASV_16s_24563 | 0.096998548 | -0.262326638 | 3.551612845 | 0.400880369 | 0.999734616 | NA |
| ASV_16s_24564 | 0.090198703 | -0.255313164 | 3.551654093 | 0.374130539 | 0.999789435 | NA |
| ASV_16s_24565 | 0.114398833 | 0.0700127    | 3.551577166 | 0.508691783 | 0.999414029 | NA |
| ASV_16s_24566 | 0.086806601 | -0.263997083 | 3.551619891 | 0.183885548 | 0.999981134 | NA |
| ASV_16s_24567 | 0.103443254 | 0.091143368  | 3.551815773 | 0.342687651 | 0.999843245 | NA |
| ASV_16s_24568 | 0.090678016 | 0.317088863  | 3.552008575 | 0.244320689 | 0.999950175 | NA |
| ASV_16s_24569 | 0.096543196 | -0.209961086 | 3.551590224 | 0.410844665 | 0.999711912 | NA |
| ASV_16s_24570 | 0.09828448  | -0.209961086 | 3.551590224 | 0.416641922 | 0.999698107 | NA |
| ASV_16s_24571 | 0.098414299 | -0.210136051 | 3.551588398 | 0.417233188 | 0.999696674 | NA |
| ASV_16s_24572 | 0.101566984 | 0.222325178  | 3.550621662 | 0.361069018 | 0.999813121 | NA |
| ASV_16s_24573 | 0.082714728 | 0.96553514   | 3.551215555 | 0.199855776 | 0.999974906 | NA |
| ASV_16s_24574 | 0.099165512 | 0.667242062  | 3.551682887 | 0.439522025 | 0.999639185 | NA |
| ASV_16s_24575 | 0.099212545 | 0.196756929  | 3.551635485 | 0.476908065 | 0.999526719 | NA |
| ASV_16s_24576 | 0.087822346 | -0.090598839 | 3.551780644 | 0.181885834 | 0.999981829 | NA |
| ASV_16s_24577 | 0.09713911  | -0.104194911 | 3.551521017 | 0.434179189 | 0.999653592 | NA |
| ASV_16s_24578 | 0.077911161 | 0.359705392  | 3.551883794 | 0.273886345 | 0.999926529 | NA |
| ASV_16s_24579 | 0.103632511 | -0.211211895 | 3.551868339 | 0.356519271 | 0.99982092  | NA |
| ASV_16s_24580 | 0.09257457  | -0.065824024 | 3.551623482 | 0.419162592 | 0.999691965 | NA |
| ASV_16s_24581 | 0.094387774 | 0.671645257  | 3.551631426 | 0.435233976 | 0.999650779 | NA |
| ASV_16s_24582 | 0.092230548 | -0.428098598 | 3.551433295 | 0.327081761 | 0.999866035 | NA |
| ASV_16s_24583 | 0.091931619 | -0.051610883 | 3.551484661 | 0.42977644  | 0.999665163 | NA |
| ASV_16s_24584 | 0.11081685  | -0.362454489 | 3.551422826 | 0.475786328 | 0.999530401 | NA |
| ASV_16s_24585 | 0.057759497 | 0.35556516   | 3.55177723  | 0.188954807 | 0.999979291 | NA |

|               |             |              |             |             |                |
|---------------|-------------|--------------|-------------|-------------|----------------|
| ASV_16s_24586 | 0.0806477   | 0.290154355  | 3.551620532 | 0.388042452 | 0.999762015 NA |
| ASV_16s_24587 | 0.097948575 | 0.932580616  | 3.551264121 | 0.147246197 | 0.999991208 NA |
| ASV_16s_24588 | 0.0986278   | 0.882864957  | 3.551824492 | 0.325247155 | 0.999868554 NA |
| ASV_16s_24589 | 0.106563683 | 7.65E-05     | 3.55145219  | 0.477141425 | 0.99952595 NA  |
| ASV_16s_24590 | 0.095815238 | 5.90E-05     | 3.551451622 | 0.450850576 | 0.999607291 NA |
| ASV_16s_24591 | 0.123789693 | 0.033252763  | 3.55194548  | 0.431847014 | 0.999659755 NA |
| ASV_16s_24592 | 0.108755472 | 1.106990335  | 3.551491962 | 0.018914113 | 0.999999993 NA |
| ASV_16s_24593 | 0.093603691 | -0.076390424 | 3.55140627  | 0.45203568  | 0.999603847 NA |
| ASV_16s_24594 | 0.094461162 | 0.050469346  | 3.551418313 | 0.458829816 | 0.999583704 NA |
| ASV_16s_24595 | 0.093370199 | 0.112617569  | 3.55108229  | 0.271619583 | 0.999928572 NA |
| ASV_16s_24596 | 0.091333569 | 0.681340316  | 3.551519948 | 0.453060066 | 0.999600853 NA |
| ASV_16s_24597 | 0.089941145 | 0.102141846  | 3.551416346 | 0.455310916 | 0.999594222 NA |
| ASV_16s_24598 | 0.095790165 | 0.580736245  | 3.551612155 | 0.377243346 | 0.9997835 NA   |
| ASV_16s_24599 | 0.096466964 | 0.911968051  | 3.551720349 | 0.377157315 | 0.999783665 NA |
| ASV_16s_24600 | 0.096466964 | 0.911968051  | 3.551720349 | 0.377157315 | 0.999783665 NA |
| ASV_16s_24601 | 0.096466964 | 0.911968051  | 3.551720349 | 0.377157315 | 0.999783665 NA |
| ASV_16s_24602 | 0.096466964 | 0.911968051  | 3.551720349 | 0.377157315 | 0.999783665 NA |
| ASV_16s_24603 | 0.096466964 | 0.911968051  | 3.551720349 | 0.377157315 | 0.999783665 NA |
| ASV_16s_24604 | 0.102360936 | 0.652467908  | 3.551862247 | 0.320696137 | 0.999874659 NA |
| ASV_16s_24605 | 0.092686355 | 1.030224038  | 3.551728274 | 0.272222117 | 0.999928033 NA |
| ASV_16s_24606 | 0.124498879 | 0.295777724  | 3.551852245 | 0.497231735 | 0.999456555 NA |
| ASV_16s_24607 | 0.124498879 | 0.295777724  | 3.551852245 | 0.497231735 | 0.999456555 NA |
| ASV_16s_24608 | 0.118626769 | 0.754949129  | 3.551856985 | 0.32712363  | 0.999865977 NA |
| ASV_16s_24609 | 0.102212002 | 0.984381113  | 3.551556338 | 0.393336009 | 0.999750966 NA |
| ASV_16s_24610 | 0.102212002 | 0.984381113  | 3.551556338 | 0.393336009 | 0.999750966 NA |
| ASV_16s_24611 | 0.098087516 | 0.969918735  | 3.551587465 | 0.383045496 | 0.99977213 NA  |
| ASV_16s_24612 | 0.081411401 | 0.906141193  | 3.551727391 | 0.345696648 | 0.999838563 NA |
| ASV_16s_24613 | 0.089341754 | 1.117604642  | 3.551621014 | 0.202709502 | 0.999973658 NA |
| ASV_16s_24614 | 0.078980089 | 0.338428035  | 3.551723186 | 0.449137551 | 0.999612233 NA |
| ASV_16s_24615 | 0.086943193 | 0.928116424  | 3.55168085  | 0.357263731 | 0.99981966 NA  |
| ASV_16s_24616 | 0.090051851 | 0.940151242  | 3.551654001 | 0.364138421 | 0.99980773 NA  |
| ASV_16s_24617 | 0.09160618  | 0.946086745  | 3.551640456 | 0.367673327 | 0.999801389 NA |
| ASV_16s_24618 | 0.096046482 | 0.962536831  | 3.551603643 | 0.378069383 | 0.999781906 NA |
| ASV_16s_24619 | 0.124438571 | 0.576734522  | 3.551769388 | 0.50439542  | 0.999430227 NA |
| ASV_16s_24620 | 0.084048554 | 0.916771462  | 3.551704655 | 0.35109863  | 0.999829915 NA |
| ASV_16s_24621 | 0.084048554 | 0.916771462  | 3.551704655 | 0.35109863  | 0.999829915 NA |
| ASV_16s_24622 | 0.084048554 | 0.916771462  | 3.551704655 | 0.35109863  | 0.999829915 NA |
| ASV_16s_24623 | 0.132809063 | 1.076370016  | 3.551362683 | 0.478531393 | 0.999521356 NA |
| ASV_16s_24624 | 0.079683804 | 0.326492724  | 3.552019671 | 0.363602674 | 0.999808679 NA |
| ASV_16s_24625 | 0.079683804 | 0.326492724  | 3.552019671 | 0.363602674 | 0.999808679 NA |
| ASV_16s_24626 | 0.079683804 | 0.326492724  | 3.552019671 | 0.363602674 | 0.999808679 NA |
| ASV_16s_24627 | 0.079683804 | 0.326492724  | 3.552019671 | 0.363602674 | 0.999808679 NA |
| ASV_16s_24628 | 0.079683804 | 0.326492724  | 3.552019671 | 0.363602674 | 0.999808679 NA |
| ASV_16s_24629 | 0.079683804 | 0.326492724  | 3.552019671 | 0.363602674 | 0.999808679 NA |
| ASV_16s_24630 | 0.079683804 | 0.326492724  | 3.552019671 | 0.363602674 | 0.999808679 NA |
| ASV_16s_24631 | 0.079683804 | 0.326492724  | 3.552019671 | 0.363602674 | 0.999808679 NA |
| ASV_16s_24632 | 0.096466964 | 0.331797481  | 3.551978501 | 0.408654651 | 0.999717012 NA |
| ASV_16s_24633 | 0.096466964 | 0.331797481  | 3.551978501 | 0.408654651 | 0.999717012 NA |
| ASV_16s_24634 | 0.096466964 | 0.331797481  | 3.551978501 | 0.408654651 | 0.999717012 NA |
| ASV_16s_24635 | 0.106696598 | 0.335362709  | 3.551953448 | 0.439589169 | 0.999639001 NA |
| ASV_16s_24636 | 0.108542416 | 0.33598843   | 3.551949177 | 0.445411965 | 0.999622833 NA |
| ASV_16s_24637 | 0.139764341 | 0.346627832  | 3.551853144 | 0.55233104  | 0.999231413 NA |
| ASV_16s_24638 | 0.11169048  | 0.874553243  | 3.551798808 | 0.299686967 | 0.999900315 NA |
| ASV_16s_24639 | 0.061750189 | 0.325080664  | 3.552040801 | 0.320475097 | 0.999874951 NA |
| ASV_16s_24640 | 0.061750189 | 0.325080664  | 3.552040801 | 0.320475097 | 0.999874951 NA |
| ASV_16s_24641 | 0.061750189 | 0.325080664  | 3.552040801 | 0.320475097 | 0.999874951 NA |
| ASV_16s_24642 | 0.061750189 | 0.325080664  | 3.552040801 | 0.320475097 | 0.999874951 NA |
| ASV_16s_24643 | 0.079559837 | 0.342942453  | 3.551964423 | 0.192369913 | 0.999977981 NA |
| ASV_16s_24644 | 0.083611133 | 0.327618209  | 3.552010368 | 0.373416316 | 0.999790781 NA |
| ASV_16s_24645 | 0.083611133 | 0.327618209  | 3.552010368 | 0.373416316 | 0.999790781 NA |
| ASV_16s_24646 | 0.083611133 | 0.327618209  | 3.552010368 | 0.373416316 | 0.999790781 NA |
| ASV_16s_24647 | 0.084479068 | -0.056258925 | 3.551608397 | 0.394614632 | 0.999748245 NA |
| ASV_16s_24648 | 0.112234051 | 0.337233062  | 3.55194079  | 0.457273504 | 0.999588378 NA |
| ASV_16s_24649 | 0.118437091 | -0.130633897 | 3.551432351 | 0.650909892 | 0.998685149 NA |
| ASV_16s_24650 | 0.142412793 | 0.347468698  | 3.551842618 | 0.561981248 | 0.999186401 NA |
| ASV_16s_24651 | 0.142412793 | 0.347468698  | 3.551842618 | 0.561981248 | 0.999186401 NA |
| ASV_16s_24652 | 0.099397857 | 0.332851507  | 3.551970965 | 0.417274144 | 0.999696574 NA |

|               |             |              |             |             |             |    |
|---------------|-------------|--------------|-------------|-------------|-------------|----|
| ASV_16s_24653 | 0.117861259 | 0.339146398  | 3.551924087 | 0.475768673 | 0.999530459 | NA |
| ASV_16s_24654 | 0.107485132 | -0.406699157 | 3.551482054 | 0.44793249  | 0.999615683 | NA |
| ASV_16s_24655 | 0.103320328 | -0.394776608 | 3.55151632  | 0.434997613 | 0.999651411 | NA |
| ASV_16s_24656 | 0.103320328 | -0.394776608 | 3.55151632  | 0.434997613 | 0.999651411 | NA |
| ASV_16s_24657 | 0.103320328 | -0.394776608 | 3.55151632  | 0.434997613 | 0.999651411 | NA |
| ASV_16s_24658 | 0.123399524 | -0.447122486 | 3.551345627 | 0.500349187 | 0.999445202 | NA |
| ASV_16s_24659 | 0.088776583 | -0.349556245 | 3.55164513  | 0.392855789 | 0.999751982 | NA |
| ASV_16s_24660 | 0.118850204 | -0.560708265 | 3.551519113 | 0.280798404 | 0.999920046 | NA |
| ASV_16s_24661 | 0.061670606 | -0.242066397 | 3.551837284 | 0.327071343 | 0.99986605  | NA |
| ASV_16s_24662 | 0.061670606 | -0.242066397 | 3.551837284 | 0.327071343 | 0.99986605  | NA |
| ASV_16s_24663 | 0.08640669  | -0.465819102 | 3.551455117 | 0.219291932 | 0.999965535 | NA |
| ASV_16s_24664 | 0.111225107 | 1.014052551  | 3.551494013 | 0.416883484 | 0.999697522 | NA |
| ASV_16s_24665 | 0.111225107 | 1.014052551  | 3.551494013 | 0.416883484 | 0.999697522 | NA |
| ASV_16s_24666 | 0.121676317 | 1.045706255  | 3.551430338 | 0.445903722 | 0.999621445 | NA |
| ASV_16s_24667 | 0.099834994 | 1.113905578  | 3.551601256 | 0.217212945 | 0.999966638 | NA |
| ASV_16s_24668 | 0.098035162 | 1.072667102  | 3.551510241 | 0.242880052 | 0.999951168 | NA |
| ASV_16s_24669 | 0.091434485 | 0.992553883  | 3.551407979 | 0.311229807 | 0.999886724 | NA |
| ASV_16s_24670 | 0.091434485 | 0.992553883  | 3.551407979 | 0.311229807 | 0.999886724 | NA |
| ASV_16s_24671 | 0.047719993 | 0.806285473  | 3.551781045 | 0.190036354 | 0.999978882 | NA |
| ASV_16s_24672 | 0.059140137 | 0.86333187   | 3.55168458  | 0.230287663 | 0.999959272 | NA |
| ASV_16s_24673 | 0.081808879 | 0.958037543  | 3.551484121 | 0.291177849 | 0.999909578 | NA |
| ASV_16s_24674 | 0.081808879 | 0.958037543  | 3.551484121 | 0.291177849 | 0.999909578 | NA |
| ASV_16s_24675 | 0.081808879 | 0.958037543  | 3.551484121 | 0.291177849 | 0.999909578 | NA |
| ASV_16s_24676 | 0.081808879 | 0.958037543  | 3.551484121 | 0.291177849 | 0.999909578 | NA |
| ASV_16s_24677 | 0.087141624 | 0.702906906  | 3.551489537 | 0.409995042 | 0.999713898 | NA |
| ASV_16s_24678 | 0.095962782 | 0.346226823  | 3.551707112 | 0.34703515  | 0.999836449 | NA |
| ASV_16s_24679 | 0.103408553 | 0.3477796    | 3.551683392 | 0.368691797 | 0.999799535 | NA |
| ASV_16s_24680 | 0.103408553 | 0.3477796    | 3.551683392 | 0.368691797 | 0.999799535 | NA |
| ASV_16s_24681 | 0.093807555 | 0.345862197  | 3.551713707 | 0.34102066  | 0.999845799 | NA |
| ASV_16s_24682 | 0.093807555 | 0.345862197  | 3.551713707 | 0.34102066  | 0.999845799 | NA |
| ASV_16s_24683 | 0.093807555 | 0.345862197  | 3.551713707 | 0.34102066  | 0.999845799 | NA |
| ASV_16s_24684 | 0.093807555 | 0.345862197  | 3.551713707 | 0.34102066  | 0.999845799 | NA |
| ASV_16s_24685 | 0.085173415 | 0.34434986   | 3.551741889 | 0.318272884 | 0.999877828 | NA |
| ASV_16s_24686 | 0.085173415 | 0.34434986   | 3.551741889 | 0.318272884 | 0.999877828 | NA |
| ASV_16s_24687 | 0.085173415 | 0.34434986   | 3.551741889 | 0.318272884 | 0.999877828 | NA |
| ASV_16s_24688 | 0.085173415 | 0.34434986   | 3.551741889 | 0.318272884 | 0.999877828 | NA |
| ASV_16s_24689 | 0.085173415 | 0.34434986   | 3.551741889 | 0.318272884 | 0.999877828 | NA |
| ASV_16s_24690 | 0.085173415 | 0.34434986   | 3.551741889 | 0.318272884 | 0.999877828 | NA |
| ASV_16s_24691 | 0.070309649 | 0.342758972  | 3.551790717 | 0.284912542 | 0.999916003 | NA |
| ASV_16s_24692 | 0.070309649 | 0.342758972  | 3.551790717 | 0.284912542 | 0.999916003 | NA |
| ASV_16s_24693 | 0.070309649 | 0.342758972  | 3.551790717 | 0.284912542 | 0.999916003 | NA |
| ASV_16s_24694 | 0.070309649 | 0.342758972  | 3.551790717 | 0.284912542 | 0.999916003 | NA |
| ASV_16s_24695 | 0.070309649 | 0.342758972  | 3.551790717 | 0.284912542 | 0.999916003 | NA |
| ASV_16s_24696 | 0.120443643 | 0.356196527  | 3.551604365 | 0.422140068 | 0.999684601 | NA |
| ASV_16s_24697 | 0.120443643 | 0.356196527  | 3.551604365 | 0.422140068 | 0.999684601 | NA |
| ASV_16s_24698 | 0.076072548 | 0.343096193  | 3.551772693 | 0.296885252 | 0.999903435 | NA |
| ASV_16s_24699 | 0.076072548 | 0.343096193  | 3.551772693 | 0.296885252 | 0.999903435 | NA |
| ASV_16s_24700 | 0.076072548 | 0.343096193  | 3.551772693 | 0.296885252 | 0.999903435 | NA |
| ASV_16s_24701 | 0.076072548 | 0.343096193  | 3.551772693 | 0.296885252 | 0.999903435 | NA |
| ASV_16s_24702 | 0.076072548 | 0.343096193  | 3.551772693 | 0.296885252 | 0.999903435 | NA |
| ASV_16s_24703 | 0.076072548 | 0.343096193  | 3.551772693 | 0.296885252 | 0.999903435 | NA |
| ASV_16s_24704 | 0.076072548 | 0.343096193  | 3.551772693 | 0.296885252 | 0.999903435 | NA |
| ASV_16s_24705 | 0.076072548 | 0.343096193  | 3.551772693 | 0.296885252 | 0.999903435 | NA |
| ASV_16s_24706 | 0.026487813 | 0.334939539  | 3.551962304 | 0.123157153 | 0.999995251 | NA |
| ASV_16s_24707 | 0.09529289  | 0.207106888  | 3.551191221 | 0.448092993 | 0.999615225 | NA |
| ASV_16s_24708 | 0.042740729 | -0.172182041 | 3.551664332 | 0.194073897 | 0.999977305 | NA |
| ASV_16s_24709 | 0.104846645 | -0.421578464 | 3.55121374  | 0.375030293 | 0.999787731 | NA |
| ASV_16s_24710 | 0.099335971 | 0.250817632  | 3.551145972 | 0.466449377 | 0.999560293 | NA |
| ASV_16s_24711 | 0.096886782 | 0.582119095  | 3.551271315 | 0.426996394 | 0.999672332 | NA |
| ASV_16s_24712 | 0.135245733 | -0.485079158 | 3.550923286 | 0.475400384 | 0.999531663 | NA |
| ASV_16s_24713 | 0.12341351  | -0.462502894 | 3.551044211 | 0.434249546 | 0.999653405 | NA |
| ASV_16s_24714 | 0.093518802 | -0.231177375 | 3.551292071 | 0.364452871 | 0.999807171 | NA |
| ASV_16s_24715 | 0.146472125 | -0.501635186 | 3.550809234 | 0.515780527 | 0.999386623 | NA |
| ASV_16s_24716 | 0.139594553 | -0.492340699 | 3.550879949 | 0.490929333 | 0.999479021 | NA |
| ASV_16s_24717 | 0.139594553 | -0.492340699 | 3.550879949 | 0.490929333 | 0.999479021 | NA |
| ASV_16s_24718 | 0.139594553 | -0.492340699 | 3.550879949 | 0.490929333 | 0.999479021 | NA |
| ASV_16s_24719 | 0.139594553 | -0.492340699 | 3.550879949 | 0.490929333 | 0.999479021 | NA |

|               |             |              |             |             |                |
|---------------|-------------|--------------|-------------|-------------|----------------|
| ASV_16s_24720 | 0.10002949  | 0.645635687  | 3.551197245 | 0.427281475 | 0.999671602 NA |
| ASV_16s_24721 | 0.12913699  | -0.474096812 | 3.550986772 | 0.454006281 | 0.999598075 NA |
| ASV_16s_24722 | 0.12913699  | -0.474096812 | 3.550986772 | 0.454006281 | 0.999598075 NA |
| ASV_16s_24723 | 0.12913699  | -0.474096812 | 3.550986772 | 0.454006281 | 0.999598075 NA |
| ASV_16s_24724 | 0.051907636 | -0.221856555 | 3.551607039 | 0.230330811 | 0.999959246 NA |
| ASV_16s_24725 | 0.051907636 | -0.221856555 | 3.551607039 | 0.230330811 | 0.999959246 NA |
| ASV_16s_24726 | 0.047572231 | -0.199212677 | 3.551633586 | 0.213499944 | 0.999968547 NA |
| ASV_16s_24727 | 0.093825297 | 1.000886142  | 3.551386215 | 0.316571394 | 0.99988002 NA  |
| ASV_16s_24728 | 0.037712265 | 0.748332937  | 3.551838102 | 0.151930033 | 0.999990208 NA |
| ASV_16s_24729 | 0.037712265 | 0.748332937  | 3.551838102 | 0.151930033 | 0.999990208 NA |
| ASV_16s_24730 | 0.093306931 | 0.999085     | 3.551391011 | 0.315400385 | 0.999881513 NA |
| ASV_16s_24731 | 0.093306931 | 0.999085     | 3.551391011 | 0.315400385 | 0.999881513 NA |
| ASV_16s_24732 | 0.093306931 | 0.999085     | 3.551391011 | 0.315400385 | 0.999881513 NA |
| ASV_16s_24733 | 0.085173415 | -0.0774842   | 3.551154507 | 0.526302555 | 0.999344359 NA |
| ASV_16s_24734 | 0.085173415 | -0.0774842   | 3.551154507 | 0.526302555 | 0.999344359 NA |
| ASV_16s_24735 | 0.085173415 | -0.0774842   | 3.551154507 | 0.526302555 | 0.999344359 NA |
| ASV_16s_24736 | 0.085173415 | -0.0774842   | 3.551154507 | 0.526302555 | 0.999344359 NA |
| ASV_16s_24737 | 0.085173415 | -0.0774842   | 3.551154507 | 0.526302555 | 0.999344359 NA |
| ASV_16s_24738 | 0.085173415 | -0.0774842   | 3.551154507 | 0.526302555 | 0.999344359 NA |
| ASV_16s_24739 | 0.085173415 | -0.0774842   | 3.551154507 | 0.526302555 | 0.999344359 NA |
| ASV_16s_24740 | 0.085173415 | -0.0774842   | 3.551154507 | 0.526302555 | 0.999344359 NA |
| ASV_16s_24741 | 0.085173415 | -0.0774842   | 3.551154507 | 0.526302555 | 0.999344359 NA |
| ASV_16s_24742 | 0.07262834  | -0.077119297 | 3.55126377  | 0.477833581 | 0.999523666 NA |
| ASV_16s_24743 | 0.07262834  | -0.077119297 | 3.55126377  | 0.477833581 | 0.999523666 NA |
| ASV_16s_24744 | 0.07262834  | -0.077119297 | 3.55126377  | 0.477833581 | 0.999523666 NA |
| ASV_16s_24745 | 0.07262834  | -0.077119297 | 3.55126377  | 0.477833581 | 0.999523666 NA |
| ASV_16s_24746 | 0.07262834  | -0.077119297 | 3.55126377  | 0.477833581 | 0.999523666 NA |
| ASV_16s_24747 | 0.07262834  | -0.077119297 | 3.55126377  | 0.477833581 | 0.999523666 NA |
| ASV_16s_24748 | 0.07262834  | -0.077119297 | 3.55126377  | 0.477833581 | 0.999523666 NA |
| ASV_16s_24749 | 0.07262834  | -0.077119297 | 3.55126377  | 0.477833581 | 0.999523666 NA |
| ASV_16s_24750 | 0.07262834  | -0.077119297 | 3.55126377  | 0.477833581 | 0.999523666 NA |
| ASV_16s_24751 | 0.07262834  | -0.077119297 | 3.55126377  | 0.477833581 | 0.999523666 NA |
| ASV_16s_24752 | 0.07262834  | -0.077119297 | 3.55126377  | 0.477833581 | 0.999523666 NA |
| ASV_16s_24753 | 0.07262834  | -0.077119297 | 3.55126377  | 0.477833581 | 0.999523666 NA |
| ASV_16s_24754 | 0.07262834  | -0.077119297 | 3.55126377  | 0.477833581 | 0.999523666 NA |
| ASV_16s_24755 | 0.07262834  | -0.077119297 | 3.55126377  | 0.477833581 | 0.999523666 NA |
| ASV_16s_24756 | 0.07262834  | -0.077119297 | 3.55126377  | 0.477833581 | 0.999523666 NA |
| ASV_16s_24757 | 0.07262834  | -0.077119297 | 3.55126377  | 0.477833581 | 0.999523666 NA |
| ASV_16s_24758 | 0.07262834  | -0.077119297 | 3.55126377  | 0.477833581 | 0.999523666 NA |
| ASV_16s_24759 | 0.07262834  | -0.077119297 | 3.55126377  | 0.477833581 | 0.999523666 NA |
| ASV_16s_24760 | 0.07262834  | -0.077119297 | 3.55126377  | 0.477833581 | 0.999523666 NA |
| ASV_16s_24761 | 0.07262834  | -0.077119297 | 3.55126377  | 0.477833581 | 0.999523666 NA |
| ASV_16s_24762 | 0.07262834  | -0.077119297 | 3.55126377  | 0.477833581 | 0.999523666 NA |
| ASV_16s_24763 | 0.07262834  | -0.077119297 | 3.55126377  | 0.477833581 | 0.999523666 NA |
| ASV_16s_24764 | 0.07262834  | -0.077119297 | 3.55126377  | 0.477833581 | 0.999523666 NA |
| ASV_16s_24765 | 0.07262834  | -0.077119297 | 3.55126377  | 0.477833581 | 0.999523666 NA |
| ASV_16s_24766 | 0.07262834  | -0.077119297 | 3.55126377  | 0.477833581 | 0.999523666 NA |
| ASV_16s_24767 | 0.077286217 | -0.077258828 | 3.551219118 | 0.495374368 | 0.999463243 NA |
| ASV_16s_24768 | 0.081944093 | -0.077400803 | 3.55117947  | 0.513475175 | 0.99939563 NA  |
| ASV_16s_24769 | 0.047599115 | 0.223389671  | 3.551156759 | 0.201007201 | 0.999974408 NA |
| ASV_16s_24770 | 0.047599115 | 0.223389671  | 3.551156759 | 0.201007201 | 0.999974408 NA |
| ASV_16s_24771 | 0.050073304 | 0.222260292  | 3.551137184 | 0.215368419 | 0.999967596 NA |
| ASV_16s_24772 | 0.05042676  | 0.222103474  | 3.551134536 | 0.217398543 | 0.999966541 NA |
| ASV_16s_24773 | 0.051870574 | 0.221473944  | 3.551124073 | 0.22563527  | 0.999962011 NA |
| ASV_16s_24774 | 0.052571487 | 0.221174579  | 3.551119188 | 0.229602338 | 0.999959684 NA |
| ASV_16s_24775 | 0.054069288 | 0.220547951  | 3.551109153 | 0.238009304 | 0.999954425 NA |
| ASV_16s_24776 | 0.054069288 | 0.220547951  | 3.551109153 | 0.238009304 | 0.999954425 NA |
| ASV_16s_24777 | 0.054069288 | 0.220547951  | 3.551109153 | 0.238009304 | 0.999954425 NA |
| ASV_16s_24778 | 0.054069288 | 0.220547951  | 3.551109153 | 0.238009304 | 0.999954425 NA |
| ASV_16s_24779 | 0.079544272 | 0.283517633  | 3.55164533  | 0.242406613 | 0.999951492 NA |
| ASV_16s_24780 | 0.053961315 | 0.220592526  | 3.551109858 | 0.237406833 | 0.999954817 NA |
| ASV_16s_24781 | 0.086934309 | 0.310969639  | 3.551337715 | 0.517194094 | 0.999381056 NA |
| ASV_16s_24782 | 0.086934309 | 0.310969639  | 3.551337715 | 0.517194094 | 0.999381056 NA |
| ASV_16s_24783 | 0.092281763 | 0.31096688   | 3.551294737 | 0.538640902 | 0.999292333 NA |
| ASV_16s_24784 | 0.092281763 | 0.31096688   | 3.551294737 | 0.538640902 | 0.999292333 NA |
| ASV_16s_24785 | 0.092281763 | 0.31096688   | 3.551294737 | 0.538640902 | 0.999292333 NA |
| ASV_16s_24786 | 0.092281763 | 0.31096688   | 3.551294737 | 0.538640902 | 0.999292333 NA |

|               |             |              |             |             |             |    |
|---------------|-------------|--------------|-------------|-------------|-------------|----|
| ASV_16s_24787 | 0.092887547 | 0.310966587  | 3.551290177 | 0.54110249  | 0.99928163  | NA |
| ASV_16s_24788 | 0.093839492 | 0.310966135  | 3.551283128 | 0.544983893 | 0.999264531 | NA |
| ASV_16s_24789 | 0.093839492 | 0.310966135  | 3.551283128 | 0.544983893 | 0.999264531 | NA |
| ASV_16s_24790 | 0.08046551  | 0.310973237  | 3.551397236 | 0.492004113 | 0.999475236 | NA |
| ASV_16s_24791 | 0.08046551  | 0.310973237  | 3.551397236 | 0.492004113 | 0.999475236 | NA |
| ASV_16s_24792 | 0.09198967  | 0.310967023  | 3.551296957 | 0.537456126 | 0.999297446 | NA |
| ASV_16s_24793 | 0.056957728 | 0.595232568  | 3.551031239 | 0.212092014 | 0.99996925  | NA |
| ASV_16s_24794 | 0.08253649  | 0.686385855  | 3.55135465  | 0.459769284 | 0.999580864 | NA |
| ASV_16s_24795 | 0.08253649  | 0.686385855  | 3.55135465  | 0.459769284 | 0.999580864 | NA |
| ASV_16s_24796 | 0.073107856 | 0.922269073  | 3.551848581 | 0.271089784 | 0.999929044 | NA |
| ASV_16s_24797 | 0.108116053 | 0.328196459  | 3.551926811 | 0.374470588 | 0.999788792 | NA |
| ASV_16s_24798 | 0.131559935 | 1.225181289  | 3.551530707 | 0.267966632 | 0.999931782 | NA |
| ASV_16s_24799 | 0.116127154 | 0.685423584  | 3.551729907 | 0.4680872   | 0.999555147 | NA |
| ASV_16s_24800 | 0.081701834 | -0.00997711  | 3.551705868 | 0.495347004 | 0.999463341 | NA |
| ASV_16s_24801 | 0.112188265 | 0.706173143  | 3.551462582 | 0.554746149 | 0.99922031  | NA |
| ASV_16s_24802 | 0.118780017 | 0.935530735  | 3.551660314 | 0.311278673 | 0.999886664 | NA |
| ASV_16s_24803 | 0.085131091 | 0.495509205  | 3.551899596 | 0.333319238 | 0.999857223 | NA |
| ASV_16s_24804 | 0.05490348  | 0.306949087  | 3.551976524 | 0.201155714 | 0.999974343 | NA |
| ASV_16s_24805 | 0.169764465 | 0.735330295  | 3.55142489  | 0.787769231 | 0.997566778 | NA |
| ASV_16s_24806 | 0.111225107 | 0.296770761  | 3.551894103 | 0.453336704 | 0.999600042 | NA |
| ASV_16s_24807 | 0.120443643 | 0.978177843  | 3.551560706 | 0.438887654 | 0.999640916 | NA |
| ASV_16s_24808 | 0.093107898 | 0.842399461  | 3.551641976 | 0.353655496 | 0.999825712 | NA |
| ASV_16s_24809 | 0.090927792 | 0.836832661  | 3.551652318 | 0.348857524 | 0.99983354  | NA |
| ASV_16s_24810 | 0.061229919 | 0.290185917  | 3.551880088 | 0.318821067 | 0.999877116 | NA |
| ASV_16s_24811 | 0.061229919 | 0.290185917  | 3.551880088 | 0.318821067 | 0.999877116 | NA |
| ASV_16s_24812 | 0.120443643 | -0.393078756 | 3.551477449 | 0.488960175 | 0.999485909 | NA |
| ASV_16s_24813 | 0.071612546 | -0.259057385 | 3.55167823  | 0.346137857 | 0.999837868 | NA |
| ASV_16s_24814 | 0.0721792   | 0.785822325  | 3.551723555 | 0.311808289 | 0.999886011 | NA |
| ASV_16s_24815 | 0.165892236 | -0.518614323 | 3.550964559 | 0.656496379 | 0.998648127 | NA |
| ASV_16s_24816 | 0.165892236 | -0.518614323 | 3.550964559 | 0.656496379 | 0.998648127 | NA |
| ASV_16s_24817 | 0.165892236 | -0.518614323 | 3.550964559 | 0.656496379 | 0.998648127 | NA |
| ASV_16s_24818 | 0.165892236 | -0.518614323 | 3.550964559 | 0.656496379 | 0.998648127 | NA |
| ASV_16s_24819 | 0.165892236 | -0.518614323 | 3.550964559 | 0.656496379 | 0.998648127 | NA |
| ASV_16s_24820 | 0.165892236 | -0.518614323 | 3.550964559 | 0.656496379 | 0.998648127 | NA |
| ASV_16s_24821 | 0.148152812 | 0.013459606  | 3.551659063 | 0.594717191 | 0.999020492 | NA |
| ASV_16s_24822 | 0.104159962 | -0.226700112 | 3.551670938 | 0.389077166 | 0.999759882 | NA |
| ASV_16s_24823 | 0.146842612 | 0.367989841  | 3.551471    | 0.514066166 | 0.999393329 | NA |
| ASV_16s_24824 | 0.10696363  | 1.043771682  | 3.55127701  | 0.348416022 | 0.999834248 | NA |
| ASV_16s_24825 | 0.10696363  | 1.043771682  | 3.55127701  | 0.348416022 | 0.999834248 | NA |
| ASV_16s_24826 | 0.10696363  | 1.043771682  | 3.55127701  | 0.348416022 | 0.999834248 | NA |
| ASV_16s_24827 | 0.10696363  | 1.043771682  | 3.55127701  | 0.348416022 | 0.999834248 | NA |
| ASV_16s_24828 | 0.10696363  | 1.043771682  | 3.55127701  | 0.348416022 | 0.999834248 | NA |
| ASV_16s_24829 | 0.10696363  | 1.043771682  | 3.55127701  | 0.348416022 | 0.999834248 | NA |
| ASV_16s_24830 | 0.10696363  | 1.043771682  | 3.55127701  | 0.348416022 | 0.999834248 | NA |
| ASV_16s_24831 | 0.10696363  | 1.043771682  | 3.55127701  | 0.348416022 | 0.999834248 | NA |
| ASV_16s_24832 | 0.100016655 | 0.844496229  | 3.551652996 | 0.366311034 | 0.999803849 | NA |
| ASV_16s_24833 | 0.126313901 | 0.744754815  | 3.551278114 | 0.538150993 | 0.999294451 | NA |
| ASV_16s_24834 | 0.060951362 | -0.07426977  | 3.551395043 | 0.431687055 | 0.999660175 | NA |
| ASV_16s_24835 | 0.060951362 | -0.07426977  | 3.551395043 | 0.431687055 | 0.999660175 | NA |
| ASV_16s_24836 | 0.18959925  | -0.028699114 | 3.550948321 | 1.064597769 | 0.993718107 | NA |
| ASV_16s_24837 | 0.168669058 | -0.028539952 | 3.551001178 | 0.962604226 | 0.995409437 | NA |
| ASV_16s_24838 | 0.128228155 | 0.403561834  | 3.551207538 | 0.930720365 | 0.995870059 | NA |
| ASV_16s_24839 | 0.124652107 | 0.443024879  | 3.551275917 | 0.672137059 | 0.998540783 | NA |
| ASV_16s_24840 | 0.168669058 | -0.028539952 | 3.551001178 | 0.962604226 | 0.995409437 | NA |
| ASV_16s_24841 | 0.115103646 | 0.5906184    | 3.551379447 | 0.736780532 | 0.998036896 | NA |
| ASV_16s_24842 | 0.134541115 | -0.028175812 | 3.55112229  | 0.800904294 | 0.997434714 | NA |
| ASV_16s_24843 | 0.134541115 | -0.028175812 | 3.55112229  | 0.800904294 | 0.997434714 | NA |
| ASV_16s_24844 | 0.134541115 | -0.028175812 | 3.55112229  | 0.800904294 | 0.997434714 | NA |
| ASV_16s_24845 | 0.105345381 | -0.024530667 | 3.5512809   | 0.669313399 | 0.998560568 | NA |
| ASV_16s_24846 | 0.103839288 | 0.556336436  | 3.551432448 | 0.759523217 | 0.997835426 | NA |
| ASV_16s_24847 | 0.109089831 | 0.633277897  | 3.551444178 | 0.688390475 | 0.998423357 | NA |
| ASV_16s_24848 | 0.080416779 | -0.017706614 | 3.551496349 | 0.565331068 | 0.999170369 | NA |
| ASV_16s_24849 | 0.080416779 | -0.017706614 | 3.551496349 | 0.565331068 | 0.999170369 | NA |
| ASV_16s_24850 | 0.080416779 | -0.017706614 | 3.551496349 | 0.565331068 | 0.999170369 | NA |
| ASV_16s_24851 | 0.080416779 | -0.017706614 | 3.551496349 | 0.565331068 | 0.999170369 | NA |
| ASV_16s_24852 | 0.080416779 | -0.017706614 | 3.551496349 | 0.565331068 | 0.999170369 | NA |
| ASV_16s_24853 | 0.080416779 | -0.017706614 | 3.551496349 | 0.565331068 | 0.999170369 | NA |



|               |             |              |             |             |                |
|---------------|-------------|--------------|-------------|-------------|----------------|
| ASV_16s_24854 | 0.091886404 | -0.072319946 | 3.551167317 | 0.577735601 | 0.999109146 NA |
| ASV_16s_24855 | 0.091886404 | -0.072319946 | 3.551167317 | 0.577735601 | 0.999109146 NA |
| ASV_16s_24856 | 0.091886404 | -0.072319946 | 3.551167317 | 0.577735601 | 0.999109146 NA |
| ASV_16s_24857 | 0.089638631 | -0.0723259   | 3.551183546 | 0.568483644 | 0.999155088 NA |
| ASV_16s_24858 | 0.067110118 | -0.065153847 | 3.551390379 | 0.48131219  | 0.999512072 NA |
| ASV_16s_24859 | 0.065904262 | -0.064346669 | 3.551404258 | 0.476991455 | 0.999526444 NA |
| ASV_16s_24860 | 0.065904262 | -0.064346669 | 3.551404258 | 0.476991455 | 0.999526444 NA |
| ASV_16s_24861 | 0.065904262 | -0.064346669 | 3.551404258 | 0.476991455 | 0.999526444 NA |
| ASV_16s_24862 | 0.065904262 | -0.064346669 | 3.551404258 | 0.476991455 | 0.999526444 NA |
| ASV_16s_24863 | 0.065904262 | -0.064346669 | 3.551404258 | 0.476991455 | 0.999526444 NA |
| ASV_16s_24864 | 0.065904262 | -0.064346669 | 3.551404258 | 0.476991455 | 0.999526444 NA |
| ASV_16s_24865 | 0.065904262 | -0.064346669 | 3.551404258 | 0.476991455 | 0.999526444 NA |
| ASV_16s_24866 | 0.065904262 | -0.064346669 | 3.551404258 | 0.476991455 | 0.999526444 NA |
| ASV_16s_24867 | 0.065904262 | -0.064346669 | 3.551404258 | 0.476991455 | 0.999526444 NA |
| ASV_16s_24868 | 0.111225107 | -0.072787705 | 3.551054642 | 0.66051132  | 0.998621094 NA |
| ASV_16s_24869 | 0.111225107 | -0.072787705 | 3.551054642 | 0.66051132  | 0.998621094 NA |
| ASV_16s_24870 | 0.111225107 | -0.072787705 | 3.551054642 | 0.66051132  | 0.998621094 NA |
| ASV_16s_24871 | 0.111225107 | -0.072787705 | 3.551054642 | 0.66051132  | 0.998621094 NA |
| ASV_16s_24872 | 0.111225107 | -0.072787705 | 3.551054642 | 0.66051132  | 0.998621094 NA |
| ASV_16s_24873 | 0.117315685 | 0.190200196  | 3.551101713 | 0.663685711 | 0.998599466 NA |
| ASV_16s_24874 | 0.081771422 | -0.071788721 | 3.551246628 | 0.536857869 | 0.999300019 NA |
| ASV_16s_24875 | 0.081771422 | -0.071788721 | 3.551246628 | 0.536857869 | 0.999300019 NA |
| ASV_16s_24876 | 0.081771422 | -0.071788721 | 3.551246628 | 0.536857869 | 0.999300019 NA |
| ASV_16s_24877 | 0.081771422 | -0.071788721 | 3.551246628 | 0.536857869 | 0.999300019 NA |
| ASV_16s_24878 | 0.087480285 | 0.035551188  | 3.551280522 | 0.529755634 | 0.99933007 NA  |
| ASV_16s_24879 | 0.097222692 | 0.300424054  | 3.551453729 | 0.562704851 | 0.999182956 NA |
| ASV_16s_24880 | 0.091733227 | 0.354531764  | 3.551630553 | 0.59731593  | 0.999006422 NA |
| ASV_16s_24881 | 0.091733227 | 0.354531764  | 3.551630553 | 0.59731593  | 0.999006422 NA |
| ASV_16s_24882 | 0.091733227 | 0.354531764  | 3.551630553 | 0.59731593  | 0.999006422 NA |
| ASV_16s_24883 | 0.091733227 | 0.354531764  | 3.551630553 | 0.59731593  | 0.999006422 NA |
| ASV_16s_24884 | 0.091733227 | 0.354531764  | 3.551630553 | 0.59731593  | 0.999006422 NA |
| ASV_16s_24885 | 0.108095937 | 0.35942538   | 3.551521773 | 0.665920462 | 0.998584105 NA |
| ASV_16s_24886 | 0.150638981 | 0.36026907   | 3.551267391 | 0.857632952 | 0.996810343 NA |
| ASV_16s_24887 | 0.14089503  | 0.336035661  | 3.551823362 | 0.588841277 | 0.99905181 NA  |
| ASV_16s_24888 | 0.114042709 | 0.719396713  | 3.551352787 | 0.606923298 | 0.998953224 NA |
| ASV_16s_24889 | 0.08154767  | 0.349864661  | 3.551702216 | 0.556468854 | 0.999212325 NA |
| ASV_16s_24890 | 0.08154767  | 0.349864661  | 3.551702216 | 0.556468854 | 0.999212325 NA |
| ASV_16s_24891 | 0.08154767  | 0.349864661  | 3.551702216 | 0.556468854 | 0.999212325 NA |
| ASV_16s_24892 | 0.08154767  | 0.349864661  | 3.551702216 | 0.556468854 | 0.999212325 NA |
| ASV_16s_24893 | 0.08154767  | 0.349864661  | 3.551702216 | 0.556468854 | 0.999212325 NA |
| ASV_16s_24894 | 0.08154767  | 0.349864661  | 3.551702216 | 0.556468854 | 0.999212325 NA |
| ASV_16s_24895 | 0.08154767  | 0.349864661  | 3.551702216 | 0.556468854 | 0.999212325 NA |
| ASV_16s_24896 | 0.08154767  | 0.349864661  | 3.551702216 | 0.556468854 | 0.999212325 NA |
| ASV_16s_24897 | 0.08154767  | 0.349864661  | 3.551702216 | 0.556468854 | 0.999212325 NA |
| ASV_16s_24898 | 0.08154767  | 0.349864661  | 3.551702216 | 0.556468854 | 0.999212325 NA |
| ASV_16s_24899 | 0.08154767  | 0.349864661  | 3.551702216 | 0.556468854 | 0.999212325 NA |
| ASV_16s_24900 | 0.08154767  | 0.349864661  | 3.551702216 | 0.556468854 | 0.999212325 NA |
| ASV_16s_24901 | 0.08154767  | 0.349864661  | 3.551702216 | 0.556468854 | 0.999212325 NA |
| ASV_16s_24902 | 0.08154767  | 0.349864661  | 3.551702216 | 0.556468854 | 0.999212325 NA |
| ASV_16s_24903 | 0.08154767  | 0.349864661  | 3.551702216 | 0.556468854 | 0.999212325 NA |
| ASV_16s_24904 | 0.08154767  | 0.349864661  | 3.551702216 | 0.556468854 | 0.999212325 NA |
| ASV_16s_24905 | 0.08154767  | 0.349864661  | 3.551702216 | 0.556468854 | 0.999212325 NA |
| ASV_16s_24906 | 0.08154767  | 0.349864661  | 3.551702216 | 0.556468854 | 0.999212325 NA |
| ASV_16s_24907 | 0.08154767  | 0.349864661  | 3.551702216 | 0.556468854 | 0.999212325 NA |
| ASV_16s_24908 | 0.08154767  | 0.349864661  | 3.551702216 | 0.556468854 | 0.999212325 NA |
| ASV_16s_24909 | 0.08154767  | 0.349864661  | 3.551702216 | 0.556468854 | 0.999212325 NA |
| ASV_16s_24910 | 0.08154767  | 0.349864661  | 3.551702216 | 0.556468854 | 0.999212325 NA |
| ASV_16s_24911 | 0.08154767  | 0.349864661  | 3.551702216 | 0.556468854 | 0.999212325 NA |
| ASV_16s_24912 | 0.08154767  | 0.349864661  | 3.551702216 | 0.556468854 | 0.999212325 NA |
| ASV_16s_24913 | 0.08154767  | 0.349864661  | 3.551702216 | 0.556468854 | 0.999212325 NA |
| ASV_16s_24914 | 0.08154767  | 0.349864661  | 3.551702216 | 0.556468854 | 0.999212325 NA |
| ASV_16s_24915 | 0.08154767  | 0.349864661  | 3.551702216 | 0.556468854 | 0.999212325 NA |
| ASV_16s_24916 | 0.08154767  | 0.349864661  | 3.551702216 | 0.556468854 | 0.999212325 NA |
| ASV_16s_24917 | 0.08154767  | 0.349864661  | 3.551702216 | 0.556468854 | 0.999212325 NA |
| ASV_16s_24918 | 0.149450301 | 0.360267452  | 3.551272693 | 0.852100427 | 0.996875185 NA |
| ASV_16s_24919 | 0.149450301 | 0.360267452  | 3.551272693 | 0.852100427 | 0.996875185 NA |
| ASV_16s_24920 | 0.105660874 | 0.315940357  | 3.551264212 | 0.617108689 | 0.99889477 NA  |

|               |             |             |             |             |                |
|---------------|-------------|-------------|-------------|-------------|----------------|
| ASV_16s_24921 | 0.105660874 | 0.315940357 | 3.551264212 | 0.617108689 | 0.99889477 NA  |
| ASV_16s_24922 | 0.105660874 | 0.315940357 | 3.551264212 | 0.617108689 | 0.99889477 NA  |
| ASV_16s_24923 | 0.105660874 | 0.315940357 | 3.551264212 | 0.617108689 | 0.99889477 NA  |
| ASV_16s_24924 | 0.105660874 | 0.315940357 | 3.551264212 | 0.617108689 | 0.99889477 NA  |
| ASV_16s_24925 | 0.105660874 | 0.315940357 | 3.551264212 | 0.617108689 | 0.99889477 NA  |
| ASV_16s_24926 | 0.105660874 | 0.315940357 | 3.551264212 | 0.617108689 | 0.99889477 NA  |
| ASV_16s_24927 | 0.105660874 | 0.315940357 | 3.551264212 | 0.617108689 | 0.99889477 NA  |
| ASV_16s_24928 | 0.105660874 | 0.315940357 | 3.551264212 | 0.617108689 | 0.99889477 NA  |
| ASV_16s_24929 | 0.105660874 | 0.315940357 | 3.551264212 | 0.617108689 | 0.99889477 NA  |
| ASV_16s_24930 | 0.098831721 | 0.315940294 | 3.551310479 | 0.588294454 | 0.99905469 NA  |
| ASV_16s_24931 | 0.112148665 | 0.44626054  | 3.551159775 | 0.800611616 | 0.997437707 NA |
| ASV_16s_24932 | 0.099292901 | 0.315940296 | 3.551307144 | 0.590234832 | 0.999044444 NA |
| ASV_16s_24933 | 0.123727496 | 0.315940222 | 3.551166318 | 0.69581006  | 0.998367724 NA |
| ASV_16s_24934 | 0.091332936 | 0.315940276 | 3.55136909  | 0.557544563 | 0.99920731 NA  |
| ASV_16s_24935 | 0.091332936 | 0.315940276 | 3.55136909  | 0.557544563 | 0.99920731 NA  |
| ASV_16s_24936 | 0.091332936 | 0.315940276 | 3.55136909  | 0.557544563 | 0.99920731 NA  |
| ASV_16s_24937 | 0.091332936 | 0.315940276 | 3.55136909  | 0.557544563 | 0.99920731 NA  |
| ASV_16s_24938 | 0.091332936 | 0.315940276 | 3.55136909  | 0.557544563 | 0.99920731 NA  |
| ASV_16s_24939 | 0.091332936 | 0.315940276 | 3.55136909  | 0.557544563 | 0.99920731 NA  |
| ASV_16s_24940 | 0.091332936 | 0.315940276 | 3.55136909  | 0.557544563 | 0.99920731 NA  |
| ASV_16s_24941 | 0.091332936 | 0.315940276 | 3.55136909  | 0.557544563 | 0.99920731 NA  |
| ASV_16s_24942 | 0.091332936 | 0.315940276 | 3.55136909  | 0.557544563 | 0.99920731 NA  |
| ASV_16s_24943 | 0.091332936 | 0.315940276 | 3.55136909  | 0.557544563 | 0.99920731 NA  |
| ASV_16s_24944 | 0.091332936 | 0.315940276 | 3.55136909  | 0.557544563 | 0.99920731 NA  |
| ASV_16s_24945 | 0.091332936 | 0.315940276 | 3.55136909  | 0.557544563 | 0.99920731 NA  |
| ASV_16s_24946 | 0.091332936 | 0.315940276 | 3.55136909  | 0.557544563 | 0.99920731 NA  |
| ASV_16s_24947 | 0.091332936 | 0.315940276 | 3.55136909  | 0.557544563 | 0.99920731 NA  |
| ASV_16s_24948 | 0.08791098  | 0.315940551 | 3.551399145 | 0.543809856 | 0.999269731 NA |
| ASV_16s_24949 | 0.08791098  | 0.315940551 | 3.551399145 | 0.543809856 | 0.999269731 NA |
| ASV_16s_24950 | 0.141794118 | 0.315940028 | 3.551093077 | 0.777833194 | 0.997663646 NA |
| ASV_16s_24951 | 0.141794118 | 0.315940028 | 3.551093077 | 0.777833194 | 0.997663646 NA |
| ASV_16s_24952 | 0.141794118 | 0.315940028 | 3.551093077 | 0.777833194 | 0.997663646 NA |
| ASV_16s_24953 | 0.107192577 | 0.315940344 | 3.55125483  | 0.623323732 | 0.998858046 NA |
| ASV_16s_24954 | 0.097755794 | 0.315939206 | 3.551318459 | 0.58362546  | 0.999079038 NA |
| ASV_16s_24955 | 0.085173415 | 0.315940588 | 3.55142489  | 0.532988515 | 0.999316501 NA |
| ASV_16s_24956 | 0.085173415 | 0.315940588 | 3.55142489  | 0.532988515 | 0.999316501 NA |
| ASV_16s_24957 | 0.085173415 | 0.315940588 | 3.55142489  | 0.532988515 | 0.999316501 NA |
| ASV_16s_24958 | 0.085173415 | 0.315940588 | 3.55142489  | 0.532988515 | 0.999316501 NA |
| ASV_16s_24959 | 0.085173415 | 0.315940588 | 3.55142489  | 0.532988515 | 0.999316501 NA |
| ASV_16s_24960 | 0.085173415 | 0.315940588 | 3.55142489  | 0.532988515 | 0.999316501 NA |
| ASV_16s_24961 | 0.085173415 | 0.315940588 | 3.55142489  | 0.532988515 | 0.999316501 NA |
| ASV_16s_24962 | 0.085173415 | 0.315940588 | 3.55142489  | 0.532988515 | 0.999316501 NA |
| ASV_16s_24963 | 0.085173415 | 0.315940588 | 3.55142489  | 0.532988515 | 0.999316501 NA |
| ASV_16s_24964 | 0.085173415 | 0.315940588 | 3.55142489  | 0.532988515 | 0.999316501 NA |
| ASV_16s_24965 | 0.085173415 | 0.315940588 | 3.55142489  | 0.532988515 | 0.999316501 NA |
| ASV_16s_24966 | 0.085173415 | 0.315940588 | 3.55142489  | 0.532988515 | 0.999316501 NA |
| ASV_16s_24967 | 0.085173415 | 0.315940588 | 3.55142489  | 0.532988515 | 0.999316501 NA |
| ASV_16s_24968 | 0.085173415 | 0.315940588 | 3.55142489  | 0.532988515 | 0.999316501 NA |
| ASV_16s_24969 | 0.085173415 | 0.315940588 | 3.55142489  | 0.532988515 | 0.999316501 NA |
| ASV_16s_24970 | 0.085173415 | 0.315940588 | 3.55142489  | 0.532988515 | 0.999316501 NA |
| ASV_16s_24971 | 0.085173415 | 0.315940588 | 3.55142489  | 0.532988515 | 0.999316501 NA |
| ASV_16s_24972 | 0.085173415 | 0.315940588 | 3.55142489  | 0.532988515 | 0.999316501 NA |
| ASV_16s_24973 | 0.085173415 | 0.315940588 | 3.55142489  | 0.532988515 | 0.999316501 NA |
| ASV_16s_24974 | 0.085173415 | 0.315940588 | 3.55142489  | 0.532988515 | 0.999316501 NA |
| ASV_16s_24975 | 0.085173415 | 0.315940588 | 3.55142489  | 0.532988515 | 0.999316501 NA |
| ASV_16s_24976 | 0.092812456 | 0.579052725 | 3.551584236 | 0.532345166 | 0.999319216 NA |
| ASV_16s_24977 | 0.101166006 | 0.627802238 | 3.551576792 | 0.571586352 | 0.999139864 NA |
| ASV_16s_24978 | 0.081113797 | 0.686342837 | 3.551368507 | 0.455233288 | 0.999594452 NA |
| ASV_16s_24979 | 0.081113797 | 0.686342837 | 3.551368507 | 0.455233288 | 0.999594452 NA |
| ASV_16s_24980 | 0.081113797 | 0.686342837 | 3.551368507 | 0.455233288 | 0.999594452 NA |
| ASV_16s_24981 | 0.146537748 | 0.687466745 | 3.551007609 | 0.694455943 | 0.998377973 NA |
| ASV_16s_24982 | 0.146537748 | 0.687466745 | 3.551007609 | 0.694455943 | 0.998377973 NA |
| ASV_16s_24983 | 0.146537748 | 0.687466745 | 3.551007609 | 0.694455943 | 0.998377973 NA |
| ASV_16s_24984 | 0.146537748 | 0.687466745 | 3.551007609 | 0.694455943 | 0.998377973 NA |
| ASV_16s_24985 | 0.133368498 | 0.976554701 | 3.551246409 | 0.504262842 | 0.999430722 NA |
| ASV_16s_24986 | 0.180284339 | 0.733555193 | 3.551171897 | 0.8970136   | 0.996323313 NA |
| ASV_16s_24987 | 0.180284339 | 0.733555193 | 3.551171897 | 0.8970136   | 0.996323313 NA |





|               |             |              |             |             |             |    |
|---------------|-------------|--------------|-------------|-------------|-------------|----|
| ASV_16s_25122 | 0.069353567 | 0.304877338  | 3.551959507 | 0.329472861 | 0.999862703 | NA |
| ASV_16s_25123 | 0.069353567 | 0.304877338  | 3.551959507 | 0.329472861 | 0.999862703 | NA |
| ASV_16s_25124 | 0.069353567 | 0.304877338  | 3.551959507 | 0.329472861 | 0.999862703 | NA |
| ASV_16s_25125 | 0.069353567 | 0.304877338  | 3.551959507 | 0.329472861 | 0.999862703 | NA |
| ASV_16s_25126 | 0.069353567 | 0.304877338  | 3.551959507 | 0.329472861 | 0.999862703 | NA |
| ASV_16s_25127 | 0.069353567 | 0.304877338  | 3.551959507 | 0.329472861 | 0.999862703 | NA |
| ASV_16s_25128 | 0.069353567 | 0.304877338  | 3.551959507 | 0.329472861 | 0.999862703 | NA |
| ASV_16s_25129 | 0.069353567 | 0.304877338  | 3.551959507 | 0.329472861 | 0.999862703 | NA |
| ASV_16s_25130 | 0.069353567 | 0.304877338  | 3.551959507 | 0.329472861 | 0.999862703 | NA |
| ASV_16s_25131 | 0.069353567 | 0.304877338  | 3.551959507 | 0.329472861 | 0.999862703 | NA |
| ASV_16s_25132 | 0.069353567 | 0.304877338  | 3.551959507 | 0.329472861 | 0.999862703 | NA |
| ASV_16s_25133 | 0.069353567 | 0.304877338  | 3.551959507 | 0.329472861 | 0.999862703 | NA |
| ASV_16s_25134 | 0.069353567 | 0.304877338  | 3.551959507 | 0.329472861 | 0.999862703 | NA |
| ASV_16s_25135 | 0.069353567 | 0.304877338  | 3.551959507 | 0.329472861 | 0.999862703 | NA |
| ASV_16s_25136 | 0.069353567 | 0.304877338  | 3.551959507 | 0.329472861 | 0.999862703 | NA |
| ASV_16s_25137 | 0.069353567 | 0.304877338  | 3.551959507 | 0.329472861 | 0.999862703 | NA |
| ASV_16s_25138 | 0.069353567 | 0.304877338  | 3.551959507 | 0.329472861 | 0.999862703 | NA |
| ASV_16s_25139 | 0.069353567 | 0.304877338  | 3.551959507 | 0.329472861 | 0.999862703 | NA |
| ASV_16s_25140 | 0.069353567 | 0.304877338  | 3.551959507 | 0.329472861 | 0.999862703 | NA |
| ASV_16s_25141 | 0.069353567 | 0.304877338  | 3.551959507 | 0.329472861 | 0.999862703 | NA |
| ASV_16s_25142 | 0.069353567 | 0.304877338  | 3.551959507 | 0.329472861 | 0.999862703 | NA |
| ASV_16s_25143 | 0.069353567 | 0.304877338  | 3.551959507 | 0.329472861 | 0.999862703 | NA |
| ASV_16s_25144 | 0.069353567 | 0.304877338  | 3.551959507 | 0.329472861 | 0.999862703 | NA |
| ASV_16s_25145 | 0.069353567 | 0.304877338  | 3.551959507 | 0.329472861 | 0.999862703 | NA |
| ASV_16s_25146 | 0.069353567 | 0.304877338  | 3.551959507 | 0.329472861 | 0.999862703 | NA |
| ASV_16s_25147 | 0.069353567 | 0.304877338  | 3.551959507 | 0.329472861 | 0.999862703 | NA |
| ASV_16s_25148 | 0.069353567 | 0.304877338  | 3.551959507 | 0.329472861 | 0.999862703 | NA |
| ASV_16s_25149 | 0.069382087 | 0.089304888  | 3.551866875 | 0.403168119 | 0.999729516 | NA |
| ASV_16s_25150 | 0.076784908 | 0.052159281  | 3.551841347 | 0.438631037 | 0.999641615 | NA |
| ASV_16s_25151 | 0.077106323 | 0.052159281  | 3.551841347 | 0.440313354 | 0.999637017 | NA |
| ASV_16s_25152 | 0.070648161 | 0.078948006  | 3.55185963  | 0.408709017 | 0.999716886 | NA |
| ASV_16s_25153 | 0.082210876 | -3.37E-04    | 3.55180523  | 0.473114119 | 0.999539093 | NA |
| ASV_16s_25154 | 0.07090708  | 0.042335235  | 3.551842592 | 0.418145542 | 0.999694454 | NA |
| ASV_16s_25155 | 0.07090708  | 0.042335235  | 3.551842592 | 0.418145542 | 0.999694454 | NA |
| ASV_16s_25156 | 0.07090708  | 0.042335235  | 3.551842592 | 0.418145542 | 0.999694454 | NA |
| ASV_16s_25157 | 0.069393495 | 0.020065508  | 3.551835838 | 0.417409814 | 0.999696245 | NA |
| ASV_16s_25158 | 0.069393495 | 0.020065508  | 3.551835838 | 0.417409814 | 0.999696245 | NA |
| ASV_16s_25159 | 0.069393495 | 0.020065508  | 3.551835838 | 0.417409814 | 0.999696245 | NA |
| ASV_16s_25160 | 0.071165999 | 0.007381811  | 3.551826139 | 0.42494231  | 0.999677561 | NA |
| ASV_16s_25161 | 0.071165999 | 0.007381811  | 3.551826139 | 0.42494231  | 0.999677561 | NA |
| ASV_16s_25162 | 0.071165999 | 0.007381811  | 3.551826139 | 0.42494231  | 0.999677561 | NA |
| ASV_16s_25163 | 0.071165999 | 0.007381811  | 3.551826139 | 0.42494231  | 0.999677561 | NA |
| ASV_16s_25164 | 0.071424917 | -0.026470496 | 3.551808301 | 0.429096622 | 0.999666926 | NA |
| ASV_16s_25165 | 0.071424917 | -0.026470496 | 3.551808301 | 0.429096622 | 0.999666926 | NA |
| ASV_16s_25166 | 0.071424917 | -0.026470496 | 3.551808301 | 0.429096622 | 0.999666926 | NA |
| ASV_16s_25167 | 0.071424917 | -0.026470496 | 3.551808301 | 0.429096622 | 0.999666926 | NA |
| ASV_16s_25168 | 0.069404903 | -0.044458519 | 3.551804958 | 0.421488087 | 0.999686224 | NA |
| ASV_16s_25169 | 0.070924192 | -0.054257716 | 3.551796501 | 0.427565781 | 0.999670872 | NA |
| ASV_16s_25170 | 0.071683836 | -0.059058695 | 3.551792376 | 0.430656216 | 0.999662873 | NA |
| ASV_16s_25171 | 0.069410607 | -0.075268743 | 3.551791025 | 0.419731995 | 0.999690566 | NA |
| ASV_16s_25172 | 0.070929896 | -0.084533718 | 3.551783134 | 0.425597643 | 0.999675899 | NA |
| ASV_16s_25173 | 0.0709356   | -0.114252334 | 3.551770001 | 0.421186339 | 0.999686973 | NA |
| ASV_16s_25174 | 0.072201674 | -0.121737237 | 3.551760933 | 0.425961614 | 0.999674973 | NA |
| ASV_16s_25175 | 0.072460593 | -0.152570955 | 3.5517422   | 0.419711973 | 0.999690616 | NA |
| ASV_16s_25176 | 0.072719512 | -0.18331875  | 3.551722115 | 0.410755319 | 0.999712121 | NA |
| ASV_16s_25177 | 0.06942772  | -0.164848551 | 3.551750756 | 0.399684734 | 0.999737255 | NA |
| ASV_16s_25178 | 0.024793065 | -0.014582799 | 3.551920132 | 0.164522368 | 0.999987123 | NA |
| ASV_16s_25179 | 0.024793065 | -0.014582799 | 3.551920132 | 0.164522368 | 0.999987123 | NA |
| ASV_16s_25180 | 0.024793065 | -0.014582799 | 3.551920132 | 0.164522368 | 0.999987123 | NA |
| ASV_16s_25181 | 0.117653248 | -0.464811794 | 3.551285445 | 0.49181685  | 0.999475897 | NA |
| ASV_16s_25182 | 0.111749442 | -0.447291025 | 3.551333872 | 0.470483359 | 0.999547543 | NA |
| ASV_16s_25183 | 0.103104967 | -0.420030202 | 3.551412353 | 0.440459272 | 0.999636616 | NA |
| ASV_16s_25184 | 0.098897061 | -0.406248564 | 3.551451462 | 0.426548886 | 0.999673476 | NA |
| ASV_16s_25185 | 0.094620127 | -0.391575745 | 3.551489836 | 0.412729191 | 0.999707473 | NA |
| ASV_16s_25186 | 0.094620127 | -0.391575745 | 3.551489836 | 0.412729191 | 0.999707473 | NA |
| ASV_16s_25187 | 0.094620127 | -0.391575745 | 3.551489836 | 0.412729191 | 0.999707473 | NA |
| ASV_16s_25188 | 0.094620127 | -0.391575745 | 3.551489836 | 0.412729191 | 0.999707473 | NA |

|               |             |              |             |             |             |    |
|---------------|-------------|--------------|-------------|-------------|-------------|----|
| ASV_16s_25189 | 0.094620127 | -0.391575745 | 3.551489836 | 0.412729191 | 0.999707473 | NA |
| ASV_16s_25190 | 0.094620127 | -0.391575745 | 3.551489836 | 0.412729191 | 0.999707473 | NA |
| ASV_16s_25191 | 0.091838253 | -0.38145483  | 3.551514944 | 0.403932593 | 0.999727797 | NA |
| ASV_16s_25192 | 0.095839025 | -0.395923822 | 3.551479183 | 0.416643339 | 0.999698103 | NA |
| ASV_16s_25193 | 0.090910962 | -0.378021792 | 3.551523562 | 0.401048066 | 0.999734245 | NA |
| ASV_16s_25194 | 0.090910962 | -0.378021792 | 3.551523562 | 0.401048066 | 0.999734245 | NA |
| ASV_16s_25195 | 0.090447316 | -0.376293759 | 3.551527919 | 0.399614982 | 0.999737409 | NA |
| ASV_16s_25196 | 0.089520025 | -0.372814287 | 3.551536733 | 0.396767456 | 0.999743618 | NA |
| ASV_16s_25197 | 0.088592734 | -0.369249374 | 3.551544719 | 0.39393408  | 0.999749696 | NA |
| ASV_16s_25198 | 0.09758031  | -0.401882156 | 3.551463404 | 0.422277189 | 0.999684259 | NA |
| ASV_16s_25199 | 0.09758031  | -0.401882156 | 3.551463404 | 0.422277189 | 0.999684259 | NA |
| ASV_16s_25200 | 0.09758031  | -0.401882156 | 3.551463404 | 0.422277189 | 0.999684259 | NA |
| ASV_16s_25201 | 0.09758031  | -0.401882156 | 3.551463404 | 0.422277189 | 0.999684259 | NA |
| ASV_16s_25202 | 0.093115892 | -0.386130715 | 3.551503289 | 0.407938573 | 0.999718666 | NA |
| ASV_16s_25203 | 0.086738152 | -0.362107577 | 3.551558709 | 0.388309852 | 0.999761465 | NA |
| ASV_16s_25204 | 0.086738152 | -0.362107577 | 3.551558709 | 0.388309852 | 0.999761465 | NA |
| ASV_16s_25205 | 0.086738152 | -0.362107577 | 3.551558709 | 0.388309852 | 0.999761465 | NA |
| ASV_16s_25206 | 0.086738152 | -0.362107577 | 3.551558709 | 0.388309852 | 0.999761465 | NA |
| ASV_16s_25207 | 0.086738152 | -0.362107577 | 3.551558709 | 0.388309852 | 0.999761465 | NA |
| ASV_16s_25208 | 0.086738152 | -0.362107577 | 3.551558709 | 0.388309852 | 0.999761465 | NA |
| ASV_16s_25209 | 0.086738152 | -0.362107577 | 3.551558709 | 0.388309852 | 0.999761465 | NA |
| ASV_16s_25210 | 0.086738152 | -0.362107577 | 3.551558709 | 0.388309852 | 0.999761465 | NA |
| ASV_16s_25211 | 0.075282595 | -0.313581445 | 3.551647435 | 0.355720603 | 0.999822265 | NA |
| ASV_16s_25212 | 0.095712939 | -0.395476204 | 3.551480276 | 0.416237461 | 0.999699084 | NA |
| ASV_16s_25213 | 0.095712939 | -0.395476204 | 3.551480276 | 0.416237461 | 0.999699084 | NA |
| ASV_16s_25214 | 0.095712939 | -0.395476204 | 3.551480276 | 0.416237461 | 0.999699084 | NA |
| ASV_16s_25215 | 0.095712939 | -0.395476204 | 3.551480276 | 0.416237461 | 0.999699084 | NA |
| ASV_16s_25216 | 0.095712939 | -0.395476204 | 3.551480276 | 0.416237461 | 0.999699084 | NA |
| ASV_16s_25217 | 0.084088247 | -0.351583506 | 3.551578978 | 0.38037677  | 0.99977741  | NA |
| ASV_16s_25218 | 0.081504982 | -0.340797456 | 3.551597957 | 0.372866732 | 0.999791813 | NA |
| ASV_16s_25219 | 0.073755187 | -0.306767111 | 3.551658542 | 0.351720099 | 0.9998289   | NA |
| ASV_16s_25220 | 0.073755187 | -0.306767111 | 3.551658542 | 0.351720099 | 0.9998289   | NA |
| ASV_16s_25221 | 0.073755187 | -0.306767111 | 3.551658542 | 0.351720099 | 0.9998289   | NA |
| ASV_16s_25222 | 0.073755187 | -0.306767111 | 3.551658542 | 0.351720099 | 0.9998289   | NA |
| ASV_16s_25223 | 0.073755187 | -0.306767111 | 3.551658542 | 0.351720099 | 0.9998289   | NA |
| ASV_16s_25224 | 0.073755187 | -0.306767111 | 3.551658542 | 0.351720099 | 0.9998289   | NA |
| ASV_16s_25225 | 0.073755187 | -0.306767111 | 3.551658542 | 0.351720099 | 0.9998289   | NA |
| ASV_16s_25226 | 0.073755187 | -0.306767111 | 3.551658542 | 0.351720099 | 0.9998289   | NA |
| ASV_16s_25227 | 0.073755187 | -0.306767111 | 3.551658542 | 0.351720099 | 0.9998289   | NA |
| ASV_16s_25228 | 0.073755187 | -0.306767111 | 3.551658542 | 0.351720099 | 0.9998289   | NA |
| ASV_16s_25229 | 0.073755187 | -0.306767111 | 3.551658542 | 0.351720099 | 0.9998289   | NA |
| ASV_16s_25230 | 0.073755187 | -0.306767111 | 3.551658542 | 0.351720099 | 0.9998289   | NA |
| ASV_16s_25231 | 0.073755187 | -0.306767111 | 3.551658542 | 0.351720099 | 0.9998289   | NA |
| ASV_16s_25232 | 0.073755187 | -0.306767111 | 3.551658542 | 0.351720099 | 0.9998289   | NA |
| ASV_16s_25233 | 0.073755187 | -0.306767111 | 3.551658542 | 0.351720099 | 0.9998289   | NA |
| ASV_16s_25234 | 0.073755187 | -0.306767111 | 3.551658542 | 0.351720099 | 0.9998289   | NA |
| ASV_16s_25235 | 0.073755187 | -0.306767111 | 3.551658542 | 0.351720099 | 0.9998289   | NA |
| ASV_16s_25236 | 0.073755187 | -0.306767111 | 3.551658542 | 0.351720099 | 0.9998289   | NA |
| ASV_16s_25237 | 0.073755187 | -0.306767111 | 3.551658542 | 0.351720099 | 0.9998289   | NA |
| ASV_16s_25238 | 0.073755187 | -0.306767111 | 3.551658542 | 0.351720099 | 0.9998289   | NA |
| ASV_16s_25239 | 0.073755187 | -0.306767111 | 3.551658542 | 0.351720099 | 0.9998289   | NA |
| ASV_16s_25240 | 0.073755187 | -0.306767111 | 3.551658542 | 0.351720099 | 0.9998289   | NA |
| ASV_16s_25241 | 0.073755187 | -0.306767111 | 3.551658542 | 0.351720099 | 0.9998289   | NA |
| ASV_16s_25242 | 0.073755187 | -0.306767111 | 3.551658542 | 0.351720099 | 0.9998289   | NA |
| ASV_16s_25243 | 0.073755187 | -0.306767111 | 3.551658542 | 0.351720099 | 0.9998289   | NA |
| ASV_16s_25244 | 0.073755187 | -0.306767111 | 3.551658542 | 0.351720099 | 0.9998289   | NA |
| ASV_16s_25245 | 0.073755187 | -0.306767111 | 3.551658542 | 0.351720099 | 0.9998289   | NA |
| ASV_16s_25246 | 0.073755187 | -0.306767111 | 3.551658542 | 0.351720099 | 0.9998289   | NA |
| ASV_16s_25247 | 0.073755187 | -0.306767111 | 3.551658542 | 0.351720099 | 0.9998289   | NA |
| ASV_16s_25248 | 0.073755187 | -0.306767111 | 3.551658542 | 0.351720099 | 0.9998289   | NA |
| ASV_16s_25249 | 0.073755187 | -0.306767111 | 3.551658542 | 0.351720099 | 0.9998289   | NA |
| ASV_16s_25250 | 0.073755187 | -0.306767111 | 3.551658542 | 0.351720099 | 0.9998289   | NA |
| ASV_16s_25251 | 0.073755187 | -0.306767111 | 3.551658542 | 0.351720099 | 0.9998289   | NA |
| ASV_16s_25252 | 0.073755187 | -0.306767111 | 3.551658542 | 0.351720099 | 0.9998289   | NA |
| ASV_16s_25253 | 0.073755187 | -0.306767111 | 3.551658542 | 0.351720099 | 0.9998289   | NA |
| ASV_16s_25254 | 0.073755187 | -0.306767111 | 3.551658542 | 0.351720099 | 0.9998289   | NA |
| ASV_16s_25255 | 0.073755187 | -0.306767111 | 3.551658542 | 0.351720099 | 0.9998289   | NA |

|               |             |              |             |             |                |
|---------------|-------------|--------------|-------------|-------------|----------------|
| ASV_16s_25256 | 0.072489113 | -0.301030364 | 3.551667877 | 0.348465054 | 0.99983417 NA  |
| ASV_16s_25257 | 0.072489113 | -0.301030364 | 3.551667877 | 0.348465054 | 0.99983417 NA  |
| ASV_16s_25258 | 0.072235898 | -0.299872969 | 3.551669772 | 0.347821768 | 0.999835198 NA |
| ASV_16s_25259 | 0.071476254 | -0.296380479 | 3.551675511 | 0.345907638 | 0.999838231 NA |
| ASV_16s_25260 | 0.071223039 | -0.295209482 | 3.551677443 | 0.34527489  | 0.999839225 NA |
| ASV_16s_25261 | 0.070969825 | -0.294035033 | 3.551679384 | 0.344644818 | 0.99984021 NA  |
| ASV_16s_25262 | 0.070969825 | -0.294035033 | 3.551679384 | 0.344644818 | 0.99984021 NA  |
| ASV_16s_25263 | 0.069450536 | -0.286914675 | 3.551691238 | 0.340921482 | 0.99984595 NA  |
| ASV_16s_25264 | 0.069450536 | -0.286914675 | 3.551691238 | 0.340921482 | 0.99984595 NA  |
| ASV_16s_25265 | 0.069450536 | -0.286914675 | 3.551691238 | 0.340921482 | 0.99984595 NA  |
| ASV_16s_25266 | 0.069450536 | -0.286914675 | 3.551691238 | 0.340921482 | 0.99984595 NA  |
| ASV_16s_25267 | 0.069450536 | -0.286914675 | 3.551691238 | 0.340921482 | 0.99984595 NA  |
| ASV_16s_25268 | 0.069450536 | -0.286914675 | 3.551691238 | 0.340921482 | 0.99984595 NA  |
| ASV_16s_25269 | 0.069450536 | -0.286914675 | 3.551691238 | 0.340921482 | 0.99984595 NA  |
| ASV_16s_25270 | 0.069450536 | -0.286914675 | 3.551691238 | 0.340921482 | 0.99984595 NA  |
| ASV_16s_25271 | 0.069450536 | -0.286914675 | 3.551691238 | 0.340921482 | 0.99984595 NA  |
| ASV_16s_25272 | 0.069450536 | -0.286914675 | 3.551691238 | 0.340921482 | 0.99984595 NA  |
| ASV_16s_25273 | 0.069450536 | -0.286914675 | 3.551691238 | 0.340921482 | 0.99984595 NA  |
| ASV_16s_25274 | 0.069450536 | -0.286914675 | 3.551691238 | 0.340921482 | 0.99984595 NA  |
| ASV_16s_25275 | 0.069450536 | -0.286914675 | 3.551691238 | 0.340921482 | 0.99984595 NA  |
| ASV_16s_25276 | 0.069450536 | -0.286914675 | 3.551691238 | 0.340921482 | 0.99984595 NA  |
| ASV_16s_25277 | 0.069450536 | -0.286914675 | 3.551691238 | 0.340921482 | 0.99984595 NA  |
| ASV_16s_25278 | 0.069450536 | -0.286914675 | 3.551691238 | 0.340921482 | 0.99984595 NA  |
| ASV_16s_25279 | 0.069450536 | -0.286914675 | 3.551691238 | 0.340921482 | 0.99984595 NA  |
| ASV_16s_25280 | 0.069450536 | -0.286914675 | 3.551691238 | 0.340921482 | 0.99984595 NA  |
| ASV_16s_25281 | 0.069450536 | -0.286914675 | 3.551691238 | 0.340921482 | 0.99984595 NA  |
| ASV_16s_25282 | 0.069450536 | -0.286914675 | 3.551691238 | 0.340921482 | 0.99984595 NA  |
| ASV_16s_25283 | 0.069450536 | -0.286914675 | 3.551691238 | 0.340921482 | 0.99984595 NA  |
| ASV_16s_25284 | 0.069450536 | -0.286914675 | 3.551691238 | 0.340921482 | 0.99984595 NA  |
| ASV_16s_25285 | 0.069450536 | -0.286914675 | 3.551691238 | 0.340921482 | 0.99984595 NA  |
| ASV_16s_25286 | 0.069450536 | -0.286914675 | 3.551691238 | 0.340921482 | 0.99984595 NA  |
| ASV_16s_25287 | 0.069450536 | -0.286914675 | 3.551691238 | 0.340921482 | 0.99984595 NA  |
| ASV_16s_25288 | 0.069450536 | -0.286914675 | 3.551691238 | 0.340921482 | 0.99984595 NA  |
| ASV_16s_25289 | 0.069450536 | -0.286914675 | 3.551691238 | 0.340921482 | 0.99984595 NA  |
| ASV_16s_25290 | 0.069450536 | -0.286914675 | 3.551691238 | 0.340921482 | 0.99984595 NA  |
| ASV_16s_25291 | 0.069450536 | -0.286914675 | 3.551691238 | 0.340921482 | 0.99984595 NA  |
| ASV_16s_25292 | 0.069450536 | -0.286914675 | 3.551691238 | 0.340921482 | 0.99984595 NA  |
| ASV_16s_25293 | 0.069450536 | -0.286914675 | 3.551691238 | 0.340921482 | 0.99984595 NA  |
| ASV_16s_25294 | 0.10578261  | -0.428738823 | 3.551386857 | 0.449675054 | 0.999610687 NA |
| ASV_16s_25295 | 0.04495472  | 0.224669469  | 3.551180043 | 0.18527344  | 0.999980642 NA |
| ASV_16s_25296 | 0.04495472  | 0.224669469  | 3.551180043 | 0.18527344  | 0.999980642 NA |
| ASV_16s_25297 | 0.023331418 | 0.240611717  | 3.551537128 | 0.050530685 | 0.99999784 NA  |
| ASV_16s_25298 | 0.023331418 | 0.240611717  | 3.551537128 | 0.050530685 | 0.99999784 NA  |
| ASV_16s_25299 | 0.036996123 | 0.46465964   | 3.551209391 | 0.176756066 | 0.999983527 NA |
| ASV_16s_25300 | 0.030846339 | 0.233061476  | 3.551366263 | 0.098180481 | 0.999997831 NA |
| ASV_16s_25301 | 0.030846339 | 0.233061476  | 3.551366263 | 0.098180481 | 0.999997831 NA |
| ASV_16s_25303 | 0.108310625 | 0.595810571  | 3.550804056 | 0.401512477 | 0.999733214 NA |
| ASV_16s_25304 | 0.108310625 | 0.595810571  | 3.550804056 | 0.401512477 | 0.999733214 NA |
| ASV_16s_25305 | 0.09758031  | 0.686766518  | 3.551232757 | 0.504534368 | 0.999429708 NA |
| ASV_16s_25306 | 0.09758031  | 0.686766518  | 3.551232757 | 0.504534368 | 0.999429708 NA |
| ASV_16s_25307 | 0.09758031  | 0.686766518  | 3.551232757 | 0.504534368 | 0.999429708 NA |
| ASV_16s_25308 | 0.09758031  | 0.686766518  | 3.551232757 | 0.504534368 | 0.999429708 NA |
| ASV_16s_25309 | 0.071888266 | 0.398543722  | 3.551974211 | 0.290408412 | 0.999910385 NA |
| ASV_16s_25310 | 0.093073738 | -0.348981632 | 3.551604534 | 0.361641623 | 0.999812124 NA |
| ASV_16s_25311 | 0.079357821 | 0.249628118  | 3.551916941 | 0.360544132 | 0.999814033 NA |
| ASV_16s_25312 | 0.073201249 | 0.106298471  | 3.551855866 | 0.343681904 | 0.999841709 NA |
| ASV_16s_25313 | 0.07678048  | -0.114055706 | 3.551770755 | 0.304225573 | 0.999895115 NA |
| ASV_16s_25314 | 0.093242458 | -0.313189241 | 3.551684587 | 0.357335797 | 0.999819537 NA |
| ASV_16s_25315 | 0.074353927 | 0.547109928  | 3.551957345 | 0.233906456 | 0.999957048 NA |
| ASV_16s_25316 | 0.071882262 | 0.539301179  | 3.551998792 | 0.284501629 | 0.999916413 NA |
| ASV_16s_25317 | 0.101250351 | -0.292162083 | 3.551702397 | 0.390063046 | 0.999757838 NA |
| ASV_16s_25318 | 0.094605341 | -0.263608364 | 3.551738601 | 0.366578427 | 0.999803368 NA |
| ASV_16s_25319 | 0.100178541 | -0.053783492 | 3.551621126 | 0.42459395  | 0.999678442 NA |
| ASV_16s_25320 | 0.099937508 | 0.020349588  | 3.551896478 | 0.38993968  | 0.999758094 NA |
| ASV_16s_25321 | 0.072388001 | 0.585562171  | 3.552002991 | 0.289470201 | 0.999911362 NA |
| ASV_16s_25322 | 0.107818724 | 0.096669498  | 3.55165769  | 0.494311801 | 0.999467044 NA |
| ASV_16s_25323 | 0.100235994 | -0.414414361 | 3.551742043 | 0.250476206 | 0.99994577 NA  |

|               |             |              |             |             |                |
|---------------|-------------|--------------|-------------|-------------|----------------|
| ASV_16s_25324 | 0.086610778 | 1.027360496  | 3.551631546 | 0.102402453 | 0.999997491 NA |
| ASV_16s_25325 | 0.04038795  | -0.244837147 | 3.551451478 | 0.119408283 | 0.999995732 NA |
| ASV_16s_25326 | 0.083723979 | 0.423400257  | 3.551840181 | 0.380666412 | 0.999776841 NA |
| ASV_16s_25327 | 0.092242764 | -0.201768432 | 3.551680923 | 0.379313435 | 0.999779489 NA |
| ASV_16s_25328 | 0.093287535 | -0.20176843  | 3.551680923 | 0.382791129 | 0.999772637 NA |
| ASV_16s_25329 | 0.093173943 | -0.20176843  | 3.551680923 | 0.382294665 | 0.999773624 NA |
| ASV_16s_25330 | 0.10196723  | -0.159154739 | 3.551612996 | 0.51166959  | 0.99940262 NA  |
| ASV_16s_25331 | 0.07955041  | 0.958444128  | 3.55130446  | 0.196187404 | 0.999976448 NA |
| ASV_16s_25332 | 0.113780051 | 0.68743213   | 3.551739769 | 0.444490669 | 0.999625424 NA |
| ASV_16s_25333 | 0.107790604 | 0.188152317  | 3.551796778 | 0.475838434 | 0.99953023 NA  |
| ASV_16s_25334 | 0.088195433 | -0.151127825 | 3.551650689 | 0.377569746 | 0.999782871 NA |
| ASV_16s_25335 | 0.098733974 | 0.066496575  | 3.551908309 | 0.322418817 | 0.999872372 NA |
| ASV_16s_25336 | 0.096778667 | -0.422094254 | 3.551739978 | 0.283600537 | 0.999917308 NA |
| ASV_16s_25337 | 0.093366605 | -0.15222592  | 3.551639001 | 0.394997799 | 0.999747426 NA |
| ASV_16s_25338 | 0.092544462 | -0.151128105 | 3.551650691 | 0.391230132 | 0.999755402 NA |
| ASV_16s_25339 | 0.092141303 | 0.259798218  | 3.551715572 | 0.257756123 | 0.999940219 NA |
| ASV_16s_25340 | 0.11401089  | -0.426570433 | 3.551416019 | 0.450421948 | 0.999608531 NA |
| ASV_16s_25341 | 0.106495927 | 1.020976521  | 3.551383237 | 0.178594717 | 0.999982932 NA |
| ASV_16s_25342 | 0.087304997 | -0.10203059  | 3.551603727 | 0.387309135 | 0.999763518 NA |
| ASV_16s_25343 | 0.088911116 | 0.23475627   | 3.551677246 | 0.36525851  | 0.999805736 NA |
| ASV_16s_25344 | 0.091447774 | -0.049568547 | 3.551558214 | 0.409778585 | 0.999714402 NA |
| ASV_16s_25345 | 0.087848761 | -0.049936577 | 3.551544503 | 0.401654511 | 0.999732898 NA |
| ASV_16s_25346 | 0.09083452  | 0.001935938  | 3.551514971 | 0.419361815 | 0.999691476 NA |
| ASV_16s_25347 | 0.097795097 | 0.356553941  | 3.551475798 | 0.441558503 | 0.999633587 NA |
| ASV_16s_25348 | 0.071024031 | -0.185043144 | 3.551896307 | 0.21919944  | 0.999965585 NA |
| ASV_16s_25349 | 0.058952034 | -0.206737812 | 3.55162525  | 0.196938971 | 0.999976137 NA |
| ASV_16s_25350 | 0.121650148 | 0.502264811  | 3.5518692   | 0.357374391 | 0.999819472 NA |
| ASV_16s_25351 | 0.077180385 | 0.311535572  | 3.55189424  | 0.339408925 | 0.99984824 NA  |
| ASV_16s_25352 | 0.08112427  | 0.054459038  | 3.55155148  | 0.395652129 | 0.999746022 NA |
| ASV_16s_25353 | 0.091526222 | 0.413234974  | 3.551427952 | 0.437435539 | 0.999644859 NA |
| ASV_16s_25354 | 0.123082288 | 1.003901563  | 3.551654682 | 0.348189312 | 0.999834611 NA |
| ASV_16s_25355 | 0.104612563 | 0.339523798  | 3.551800993 | 0.250728217 | 0.999945584 NA |
| ASV_16s_25356 | 0.086998986 | 0.08789282   | 3.551190853 | 0.240325042 | 0.999952896 NA |
| ASV_16s_25357 | 0.091107688 | 0.894753127  | 3.551749777 | 0.358122748 | 0.999818198 NA |
| ASV_16s_25358 | 0.091107688 | 0.894753127  | 3.551749777 | 0.358122748 | 0.999818198 NA |
| ASV_16s_25359 | 0.091107688 | 0.894753127  | 3.551749777 | 0.358122748 | 0.999818198 NA |
| ASV_16s_25360 | 0.091107688 | 0.894753127  | 3.551749777 | 0.358122748 | 0.999818198 NA |
| ASV_16s_25361 | 0.084309549 | 0.809186253  | 3.551861099 | 0.240453292 | 0.99995281 NA  |
| ASV_16s_25362 | 0.117582274 | 0.296286758  | 3.551873416 | 0.47480833  | 0.999533595 NA |
| ASV_16s_25363 | 0.106426265 | 0.31614923   | 3.552006187 | 0.272614685 | 0.99992768 NA  |
| ASV_16s_25364 | 0.10272595  | 0.317756616  | 3.552011503 | 0.263239548 | 0.999935785 NA |
| ASV_16s_25365 | 0.067656966 | -0.117595774 | 3.551849779 | 0.191738447 | 0.999978227 NA |
| ASV_16s_25366 | 0.098286415 | 0.819429019  | 3.551868681 | 0.258796466 | 0.999939395 NA |
| ASV_16s_25367 | 0.086133257 | 0.924807857  | 3.551687744 | 0.347833279 | 0.999835179 NA |
| ASV_16s_25368 | 0.076888545 | 0.887227463  | 3.551768209 | 0.327574909 | 0.999865353 NA |
| ASV_16s_25369 | 0.076888545 | 0.887227463  | 3.551768209 | 0.327574909 | 0.999865353 NA |
| ASV_16s_25370 | 0.076888545 | 0.887227463  | 3.551768209 | 0.327574909 | 0.999865353 NA |
| ASV_16s_25371 | 0.076888545 | 0.887227463  | 3.551768209 | 0.327574909 | 0.999865353 NA |
| ASV_16s_25372 | 0.060042841 | 0.954522975  | 3.551840785 | 0.148513933 | 0.999990945 NA |
| ASV_16s_25373 | 0.110778207 | 0.572041622  | 3.551785665 | 0.571707694 | 0.999139265 NA |
| ASV_16s_25374 | 0.083118688 | 0.912915902  | 3.551712853 | 0.340968257 | 0.999845879 NA |
| ASV_16s_25375 | 0.082113016 | 0.908865881  | 3.551721524 | 0.33873651  | 0.999849251 NA |
| ASV_16s_25376 | 0.084703564 | 0.91923144   | 3.551699453 | 0.344560228 | 0.999840342 NA |
| ASV_16s_25377 | 0.066666873 | 1.003705939  | 3.551813598 | 0.156860696 | 0.999989071 NA |
| ASV_16s_25378 | 0.086516948 | 0.926330892  | 3.551684565 | 0.34875538  | 0.999833704 NA |
| ASV_16s_25379 | 0.086516948 | 0.926330892  | 3.551684565 | 0.34875538  | 0.999833704 NA |
| ASV_16s_25380 | 0.099057528 | 0.973176918  | 3.551580391 | 0.380041009 | 0.999778068 NA |
| ASV_16s_25381 | 0.108345768 | 0.832951714  | 3.551710822 | 0.316106977 | 0.999880614 NA |
| ASV_16s_25382 | 0.07937919  | 0.897651587  | 3.551745697 | 0.332800804 | 0.99985797 NA  |
| ASV_16s_25383 | 0.07937919  | 0.897651587  | 3.551745697 | 0.332800804 | 0.99985797 NA  |
| ASV_16s_25384 | 0.07937919  | 0.897651587  | 3.551745697 | 0.332800804 | 0.99985797 NA  |
| ASV_16s_25385 | 0.07937919  | 0.897651587  | 3.551745697 | 0.332800804 | 0.99985797 NA  |
| ASV_16s_25386 | 0.07937919  | 0.897651587  | 3.551745697 | 0.332800804 | 0.99985797 NA  |
| ASV_16s_25387 | 0.118933487 | 1.128240489  | 3.551448358 | 0.333730335 | 0.999856628 NA |
| ASV_16s_25388 | 0.075256926 | 0.325686647  | 3.552027479 | 0.344592773 | 0.999840292 NA |
| ASV_16s_25389 | 0.091107688 | 0.329779999  | 3.551993232 | 0.388475623 | 0.999761123 NA |
| ASV_16s_25390 | 0.091107688 | 0.329779999  | 3.551993232 | 0.388475623 | 0.999761123 NA |



|               |             |              |             |             |             |    |
|---------------|-------------|--------------|-------------|-------------|-------------|----|
| ASV_16s_25391 | 0.091107688 | 0.329779999  | 3.551993232 | 0.388475623 | 0.999761123 | NA |
| ASV_16s_25392 | 0.094153628 | -0.041319149 | 3.551714273 | 0.523847463 | 0.999354392 | NA |
| ASV_16s_25393 | 0.105380506 | 0.812734348  | 3.551584202 | 0.518030731 | 0.999377745 | NA |
| ASV_16s_25394 | 0.10076901  | 0.333319121  | 3.551967657 | 0.4185307   | 0.999693513 | NA |
| ASV_16s_25395 | 0.122300295 | 0.091537331  | 3.551976513 | 0.370963172 | 0.999795359 | NA |
| ASV_16s_25396 | 0.120360423 | 0.046439499  | 3.551962508 | 0.351863514 | 0.999828665 | NA |
| ASV_16s_25397 | 0.058319623 | 0.325269386  | 3.552042323 | 0.307174064 | 0.999891637 | NA |
| ASV_16s_25398 | 0.058319623 | 0.325269386  | 3.552042323 | 0.307174064 | 0.999891637 | NA |
| ASV_16s_25399 | 0.072567341 | 0.3377684    | 3.552004523 | 0.176779939 | 0.99998352  | NA |
| ASV_16s_25400 | 0.068729946 | 0.3377684    | 3.552004523 | 0.173053674 | 0.999984682 | NA |
| ASV_16s_25401 | 0.07896607  | 0.326330096  | 3.552021138 | 0.354182797 | 0.999824836 | NA |
| ASV_16s_25402 | 0.07896607  | 0.326330096  | 3.552021138 | 0.354182797 | 0.999824836 | NA |
| ASV_16s_25403 | 0.07896607  | 0.326330096  | 3.552021138 | 0.354182797 | 0.999824836 | NA |
| ASV_16s_25404 | 0.07896607  | 0.326330096  | 3.552021138 | 0.354182797 | 0.999824836 | NA |
| ASV_16s_25405 | 0.105998825 | 0.335112672  | 3.551955165 | 0.435709304 | 0.999649507 | NA |
| ASV_16s_25406 | 0.136922538 | 0.345502875  | 3.551863574 | 0.547068272 | 0.999255235 | NA |
| ASV_16s_25407 | 0.136922538 | 0.345502875  | 3.551863574 | 0.547068272 | 0.999255235 | NA |
| ASV_16s_25408 | 0.136922538 | 0.345502875  | 3.551863574 | 0.547068272 | 0.999255235 | NA |
| ASV_16s_25409 | 0.134500971 | 0.344603768  | 3.551871465 | 0.537846337 | 0.999295765 | NA |
| ASV_16s_25410 | 0.134500971 | 0.344603768  | 3.551871465 | 0.537846337 | 0.999295765 | NA |
| ASV_16s_25411 | 0.134500971 | 0.344603768  | 3.551871465 | 0.537846337 | 0.999295765 | NA |
| ASV_16s_25412 | 0.093875753 | 0.330826217  | 3.551985541 | 0.396846086 | 0.999743448 | NA |
| ASV_16s_25413 | 0.093875753 | 0.330826217  | 3.551985541 | 0.396846086 | 0.999743448 | NA |
| ASV_16s_25414 | 0.101513736 | -0.389326047 | 3.551532245 | 0.427106161 | 0.999672051 | NA |
| ASV_16s_25415 | 0.09758031  | -0.377433224 | 3.551567357 | 0.414506101 | 0.999703245 | NA |
| ASV_16s_25416 | 0.09758031  | -0.377433224 | 3.551567357 | 0.414506101 | 0.999703245 | NA |
| ASV_16s_25417 | 0.09758031  | -0.377433224 | 3.551567357 | 0.414506101 | 0.999703245 | NA |
| ASV_16s_25418 | 0.09758031  | -0.377433224 | 3.551567357 | 0.414506101 | 0.999703245 | NA |
| ASV_16s_25419 | 0.09758031  | -0.377433224 | 3.551567357 | 0.414506101 | 0.999703245 | NA |
| ASV_16s_25420 | 0.09758031  | -0.377433224 | 3.551567357 | 0.414506101 | 0.999703245 | NA |
| ASV_16s_25421 | 0.09758031  | -0.377433224 | 3.551567357 | 0.414506101 | 0.999703245 | NA |
| ASV_16s_25422 | 0.09758031  | -0.377433224 | 3.551567357 | 0.414506101 | 0.999703245 | NA |
| ASV_16s_25423 | 0.116543995 | -0.430116599 | 3.551403997 | 0.478218583 | 0.999522392 | NA |
| ASV_16s_25424 | 0.097527586 | 0.011374215  | 3.551548428 | 0.431639727 | 0.999660299 | NA |
| ASV_16s_25425 | 0.148253984 | -0.517517279 | 3.551592773 | 0.289644966 | 0.999911181 | NA |
| ASV_16s_25426 | 0.083844551 | -0.332537802 | 3.55168882  | 0.373216149 | 0.999791157 | NA |
| ASV_16s_25427 | 0.083844551 | -0.332537802 | 3.55168882  | 0.373216149 | 0.999791157 | NA |
| ASV_16s_25428 | 0.058244461 | -0.22480941  | 3.551855164 | 0.31230094  | 0.999885401 | NA |
| ASV_16s_25429 | 0.058244461 | -0.22480941  | 3.551855164 | 0.31230094  | 0.999885401 | NA |
| ASV_16s_25430 | 0.071435757 | -0.375561365 | 3.551773759 | 0.253712819 | 0.999943349 | NA |
| ASV_16s_25431 | 0.105045934 | 0.993800134  | 3.551536194 | 0.396289685 | 0.99974465  | NA |
| ASV_16s_25432 | 0.105045934 | 0.993800134  | 3.551536194 | 0.396289685 | 0.99974465  | NA |
| ASV_16s_25433 | 0.105045934 | 0.993800134  | 3.551536194 | 0.396289685 | 0.99974465  | NA |
| ASV_16s_25434 | 0.105045934 | 0.993800134  | 3.551536194 | 0.396289685 | 0.99974465  | NA |
| ASV_16s_25435 | 0.133636319 | 1.078304865  | 3.551358014 | 0.481611306 | 0.999511066 | NA |
| ASV_16s_25436 | 0.114916522 | 1.025417505  | 3.551470931 | 0.424423471 | 0.999678872 | NA |
| ASV_16s_25437 | 0.086354791 | 0.974545172  | 3.551448378 | 0.292710202 | 0.999907956 | NA |
| ASV_16s_25438 | 0.045068882 | 0.791749064  | 3.551796126 | 0.18008598  | 0.999982438 | NA |
| ASV_16s_25439 | 0.045068882 | 0.791749064  | 3.551796126 | 0.18008598  | 0.999982438 | NA |
| ASV_16s_25440 | 0.045068882 | 0.791749064  | 3.551796126 | 0.18008598  | 0.999982438 | NA |
| ASV_16s_25441 | 0.045068882 | 0.791749064  | 3.551796126 | 0.18008598  | 0.999982438 | NA |
| ASV_16s_25442 | 0.050750363 | 0.821951716  | 3.551764747 | 0.193288797 | 0.999977618 | NA |
| ASV_16s_25443 | 0.077263941 | 0.940458725  | 3.551523466 | 0.27345883  | 0.999926917 | NA |
| ASV_16s_25444 | 0.077263941 | 0.940458725  | 3.551523466 | 0.27345883  | 0.999926917 | NA |
| ASV_16s_25445 | 0.077263941 | 0.940458725  | 3.551523466 | 0.27345883  | 0.999926917 | NA |
| ASV_16s_25446 | 0.077263941 | 0.940458725  | 3.551523466 | 0.27345883  | 0.999926917 | NA |
| ASV_16s_25447 | 0.077263941 | 0.940458725  | 3.551523466 | 0.27345883  | 0.999926917 | NA |
| ASV_16s_25448 | 0.077263941 | 0.940458725  | 3.551523466 | 0.27345883  | 0.999926917 | NA |
| ASV_16s_25449 | 0.120127683 | 0.356011633  | 3.551605998 | 0.422490636 | 0.999683726 | NA |
| ASV_16s_25450 | 0.097663633 | 0.346501812  | 3.55170219  | 0.348342489 | 0.999834366 | NA |
| ASV_16s_25451 | 0.088596024 | 0.34495396   | 3.551730468 | 0.32149156  | 0.999873606 | NA |
| ASV_16s_25452 | 0.088596024 | 0.34495396   | 3.551730468 | 0.32149156  | 0.999873606 | NA |
| ASV_16s_25453 | 0.088596024 | 0.34495396   | 3.551730468 | 0.32149156  | 0.999873606 | NA |
| ASV_16s_25454 | 0.080441559 | 0.343460987  | 3.551759094 | 0.299477485 | 0.999900551 | NA |
| ASV_16s_25455 | 0.080441559 | 0.343460987  | 3.551759094 | 0.299477485 | 0.999900551 | NA |
| ASV_16s_25456 | 0.066403557 | 0.342518476  | 3.551803964 | 0.267148033 | 0.999932487 | NA |
| ASV_16s_25457 | 0.066403557 | 0.342518476  | 3.551803964 | 0.267148033 | 0.999932487 | NA |

|               |             |              |             |             |             |    |
|---------------|-------------|--------------|-------------|-------------|-------------|----|
| ASV_16s_25458 | 0.066403557 | 0.342518476  | 3.551803964 | 0.267148033 | 0.999932487 | NA |
| ASV_16s_25459 | 0.066403557 | 0.342518476  | 3.551803964 | 0.267148033 | 0.999932487 | NA |
| ASV_16s_25460 | 0.066403557 | 0.342518476  | 3.551803964 | 0.267148033 | 0.999932487 | NA |
| ASV_16s_25461 | 0.066403557 | 0.342518476  | 3.551803964 | 0.267148033 | 0.999932487 | NA |
| ASV_16s_25462 | 0.066403557 | 0.342518476  | 3.551803964 | 0.267148033 | 0.999932487 | NA |
| ASV_16s_25463 | 0.066403557 | 0.342518476  | 3.551803964 | 0.267148033 | 0.999932487 | NA |
| ASV_16s_25464 | 0.066403557 | 0.342518476  | 3.551803964 | 0.267148033 | 0.999932487 | NA |
| ASV_16s_25465 | 0.066403557 | 0.342518476  | 3.551803964 | 0.267148033 | 0.999932487 | NA |
| ASV_16s_25466 | 0.066403557 | 0.342518476  | 3.551803964 | 0.267148033 | 0.999932487 | NA |
| ASV_16s_25467 | 0.066403557 | 0.342518476  | 3.551803964 | 0.267148033 | 0.999932487 | NA |
| ASV_16s_25468 | 0.11375233  | 0.352796911  | 3.551634846 | 0.400473879 | 0.999735515 | NA |
| ASV_16s_25469 | 0.11375233  | 0.352796911  | 3.551634846 | 0.400473879 | 0.999735515 | NA |
| ASV_16s_25470 | 0.11375233  | 0.352796911  | 3.551634846 | 0.400473879 | 0.999735515 | NA |
| ASV_16s_25471 | 0.11375233  | 0.352796911  | 3.551634846 | 0.400473879 | 0.999735515 | NA |
| ASV_16s_25472 | 0.071846295 | 0.342848002  | 3.551785896 | 0.278709942 | 0.999922045 | NA |
| ASV_16s_25473 | 0.071846295 | 0.342848002  | 3.551785896 | 0.278709942 | 0.999922045 | NA |
| ASV_16s_25474 | 0.071846295 | 0.342848002  | 3.551785896 | 0.278709942 | 0.999922045 | NA |
| ASV_16s_25475 | 0.13868469  | 0.364588171  | 3.551519973 | 0.490241817 | 0.999481433 | NA |
| ASV_16s_25476 | 0.13868469  | 0.364588171  | 3.551519973 | 0.490241817 | 0.999481433 | NA |
| ASV_16s_25477 | 0.025016267 | 0.334407202  | 3.551966842 | 0.116484889 | 0.999996082 | NA |
| ASV_16s_25478 | 0.100790497 | 0.347016435  | 3.551693092 | 0.358111929 | 0.999818216 | NA |
| ASV_16s_25479 | 0.100790497 | 0.347016435  | 3.551693092 | 0.358111929 | 0.999818216 | NA |
| ASV_16s_25480 | 0.100790497 | 0.347016435  | 3.551693092 | 0.358111929 | 0.999818216 | NA |
| ASV_16s_25481 | 0.040366244 | -0.157948496 | 3.55168104  | 0.184189485 | 0.999981027 | NA |
| ASV_16s_25482 | 0.040366244 | -0.157948496 | 3.55168104  | 0.184189485 | 0.999981027 | NA |
| ASV_16s_25483 | 0.067757668 | -0.283004795 | 3.551432093 | 0.29999852  | 0.999899964 | NA |
| ASV_16s_25484 | 0.099021831 | -0.407006045 | 3.551261153 | 0.354903165 | 0.999823635 | NA |
| ASV_16s_25485 | 0.099021831 | -0.407006045 | 3.551261153 | 0.354903165 | 0.999823635 | NA |
| ASV_16s_25486 | 0.099021831 | -0.407006045 | 3.551261153 | 0.354903165 | 0.999823635 | NA |
| ASV_16s_25487 | 0.099021831 | -0.407006045 | 3.551261153 | 0.354903165 | 0.999823635 | NA |
| ASV_16s_25488 | 0.099021831 | -0.407006045 | 3.551261153 | 0.354903165 | 0.999823635 | NA |
| ASV_16s_25489 | 0.099021831 | -0.407006045 | 3.551261153 | 0.354903165 | 0.999823635 | NA |
| ASV_16s_25490 | 0.127732082 | -0.471338536 | 3.551002645 | 0.452734615 | 0.999601806 | NA |
| ASV_16s_25491 | 0.1318393   | -0.478890321 | 3.550958815 | 0.467892299 | 0.999555761 | NA |
| ASV_16s_25492 | 0.1318393   | -0.478890321 | 3.550958815 | 0.467892299 | 0.999555761 | NA |
| ASV_16s_25493 | 0.1318393   | -0.478890321 | 3.550958815 | 0.467892299 | 0.999555761 | NA |
| ASV_16s_25494 | 0.121962713 | -0.459418498 | 3.551058367 | 0.431828198 | 0.999659804 | NA |
| ASV_16s_25495 | 0.049023878 | -0.206823479 | 3.551625156 | 0.219102804 | 0.999965637 | NA |
| ASV_16s_25496 | 0.049023878 | -0.206823479 | 3.551625156 | 0.219102804 | 0.999965637 | NA |
| ASV_16s_25497 | 0.04492933  | -0.18461293  | 3.551650035 | 0.202873548 | 0.999973585 | NA |
| ASV_16s_25498 | 0.04492933  | -0.18461293  | 3.551650035 | 0.202873548 | 0.999973585 | NA |
| ASV_16s_25499 | 0.04492933  | -0.18461293  | 3.551650035 | 0.202873548 | 0.999973585 | NA |
| ASV_16s_25500 | 0.080441559 | -0.346162051 | 3.551399331 | 0.301081015 | 0.999898738 | NA |
| ASV_16s_25501 | 0.08861278  | 0.982525737  | 3.551431506 | 0.297886407 | 0.999902328 | NA |
| ASV_16s_25502 | 0.08861278  | 0.982525737  | 3.551431506 | 0.297886407 | 0.999902328 | NA |
| ASV_16s_25503 | 0.08861278  | 0.982525737  | 3.551431506 | 0.297886407 | 0.999902328 | NA |
| ASV_16s_25504 | 0.08861278  | 0.982525737  | 3.551431506 | 0.297886407 | 0.999902328 | NA |
| ASV_16s_25505 | 0.035617139 | 0.73456522   | 3.551846818 | 0.143565556 | 0.999991942 | NA |
| ASV_16s_25506 | 0.035617139 | 0.73456522   | 3.551846818 | 0.143565556 | 0.999991942 | NA |
| ASV_16s_25507 | 0.035617139 | 0.73456522   | 3.551846818 | 0.143565556 | 0.999991942 | NA |
| ASV_16s_25508 | 0.088123212 | 0.980810615  | 3.55143511  | 0.296751817 | 0.999903582 | NA |
| ASV_16s_25509 | 0.088123212 | 0.980810615  | 3.55143511  | 0.296751817 | 0.999903582 | NA |
| ASV_16s_25510 | 0.088123212 | 0.980810615  | 3.55143511  | 0.296751817 | 0.999903582 | NA |
| ASV_16s_25511 | 0.080441559 | -0.077359087 | 3.551191932 | 0.500276929 | 0.999445467 | NA |
| ASV_16s_25512 | 0.080441559 | -0.077359087 | 3.551191932 | 0.500276929 | 0.999445467 | NA |
| ASV_16s_25513 | 0.080441559 | -0.077359087 | 3.551191932 | 0.500276929 | 0.999445467 | NA |
| ASV_16s_25514 | 0.080441559 | -0.077359087 | 3.551191932 | 0.500276929 | 0.999445467 | NA |
| ASV_16s_25515 | 0.080441559 | -0.077359087 | 3.551191932 | 0.500276929 | 0.999445467 | NA |
| ASV_16s_25516 | 0.080441559 | -0.077359087 | 3.551191932 | 0.500276929 | 0.999445467 | NA |
| ASV_16s_25517 | 0.080441559 | -0.077359087 | 3.551191932 | 0.500276929 | 0.999445467 | NA |
| ASV_16s_25518 | 0.080441559 | -0.077359087 | 3.551191932 | 0.500276929 | 0.999445467 | NA |
| ASV_16s_25519 | 0.080441559 | -0.077359087 | 3.551191932 | 0.500276929 | 0.999445467 | NA |
| ASV_16s_25520 | 0.084747364 | 0.22801934   | 3.551152456 | 0.629492204 | 0.998820796 | NA |
| ASV_16s_25521 | 0.068593432 | -0.076963786 | 3.551307498 | 0.453058322 | 0.999600859 | NA |
| ASV_16s_25522 | 0.068593432 | -0.076963786 | 3.551307498 | 0.453058322 | 0.999600859 | NA |
| ASV_16s_25523 | 0.068593432 | -0.076963786 | 3.551307498 | 0.453058322 | 0.999600859 | NA |
| ASV_16s_25524 | 0.068593432 | -0.076963786 | 3.551307498 | 0.453058322 | 0.999600859 | NA |

|               |             |              |             |             |             |    |
|---------------|-------------|--------------|-------------|-------------|-------------|----|
| ASV_16s_25525 | 0.068593432 | -0.076963786 | 3.551307498 | 0.453058322 | 0.999600859 | NA |
| ASV_16s_25526 | 0.068593432 | -0.076963786 | 3.551307498 | 0.453058322 | 0.999600859 | NA |
| ASV_16s_25527 | 0.068593432 | -0.076963786 | 3.551307498 | 0.453058322 | 0.999600859 | NA |
| ASV_16s_25528 | 0.068593432 | -0.076963786 | 3.551307498 | 0.453058322 | 0.999600859 | NA |
| ASV_16s_25529 | 0.068593432 | -0.076963786 | 3.551307498 | 0.453058322 | 0.999600859 | NA |
| ASV_16s_25530 | 0.068593432 | -0.076963786 | 3.551307498 | 0.453058322 | 0.999600859 | NA |
| ASV_16s_25531 | 0.068593432 | -0.076963786 | 3.551307498 | 0.453058322 | 0.999600859 | NA |
| ASV_16s_25532 | 0.068593432 | -0.076963786 | 3.551307498 | 0.453058322 | 0.999600859 | NA |
| ASV_16s_25533 | 0.068593432 | -0.076963786 | 3.551307498 | 0.453058322 | 0.999600859 | NA |
| ASV_16s_25534 | 0.068593432 | -0.076963786 | 3.551307498 | 0.453058322 | 0.999600859 | NA |
| ASV_16s_25535 | 0.068593432 | -0.076963786 | 3.551307498 | 0.453058322 | 0.999600859 | NA |
| ASV_16s_25536 | 0.068593432 | -0.076963786 | 3.551307498 | 0.453058322 | 0.999600859 | NA |
| ASV_16s_25537 | 0.068593432 | -0.076963786 | 3.551307498 | 0.453058322 | 0.999600859 | NA |
| ASV_16s_25538 | 0.068593432 | -0.076963786 | 3.551307498 | 0.453058322 | 0.999600859 | NA |
| ASV_16s_25539 | 0.068593432 | -0.076963786 | 3.551307498 | 0.453058322 | 0.999600859 | NA |
| ASV_16s_25540 | 0.068593432 | -0.076963786 | 3.551307498 | 0.453058322 | 0.999600859 | NA |
| ASV_16s_25541 | 0.068593432 | -0.076963786 | 3.551307498 | 0.453058322 | 0.999600859 | NA |
| ASV_16s_25542 | 0.068593432 | -0.076963786 | 3.551307498 | 0.453058322 | 0.999600859 | NA |
| ASV_16s_25543 | 0.068593432 | -0.076963786 | 3.551307498 | 0.453058322 | 0.999600859 | NA |
| ASV_16s_25544 | 0.068593432 | -0.076963786 | 3.551307498 | 0.453058322 | 0.999600859 | NA |
| ASV_16s_25545 | 0.077391644 | -0.077270913 | 3.551218337 | 0.487772109 | 0.999490035 | NA |
| ASV_16s_25546 | 0.077391644 | -0.077270913 | 3.551218337 | 0.487772109 | 0.999490035 | NA |
| ASV_16s_25547 | 0.077391644 | -0.077270913 | 3.551218337 | 0.487772109 | 0.999490035 | NA |
| ASV_16s_25548 | 0.047782364 | 0.223310059  | 3.55115535  | 0.201949601 | 0.999973995 | NA |
| ASV_16s_25549 | 0.04813582  | 0.223145753  | 3.551152456 | 0.204015428 | 0.999973073 | NA |
| ASV_16s_25550 | 0.051065439 | 0.221828141  | 3.551129927 | 0.220930215 | 0.999964648 | NA |
| ASV_16s_25551 | 0.051065439 | 0.221828141  | 3.551129927 | 0.220930215 | 0.999964648 | NA |
| ASV_16s_25552 | 0.051065439 | 0.221828141  | 3.551129927 | 0.220930215 | 0.999964648 | NA |
| ASV_16s_25553 | 0.051065439 | 0.221828141  | 3.551129927 | 0.220930215 | 0.999964648 | NA |
| ASV_16s_25554 | 0.051023449 | 0.221846498  | 3.551130232 | 0.220690772 | 0.999964779 | NA |
| ASV_16s_25555 | 0.050963465 | 0.22187271   | 3.551130669 | 0.220348185 | 0.999964965 | NA |
| ASV_16s_25556 | 0.050963465 | 0.22187271   | 3.551130669 | 0.220348185 | 0.999964965 | NA |
| ASV_16s_25557 | 0.050963465 | 0.22187271   | 3.551130669 | 0.220348185 | 0.999964965 | NA |
| ASV_16s_25558 | 0.050963465 | 0.22187271   | 3.551130669 | 0.220348185 | 0.999964965 | NA |
| ASV_16s_25559 | 0.050963465 | 0.22187271   | 3.551130669 | 0.220348185 | 0.999964965 | NA |
| ASV_16s_25560 | 0.082104625 | 0.310972473  | 3.551381484 | 0.491289827 | 0.999477754 | NA |
| ASV_16s_25561 | 0.082104625 | 0.310972473  | 3.551381484 | 0.491289827 | 0.999477754 | NA |
| ASV_16s_25562 | 0.082104625 | 0.310972473  | 3.551381484 | 0.491289827 | 0.999477754 | NA |
| ASV_16s_25563 | 0.082104625 | 0.310972473  | 3.551381484 | 0.491289827 | 0.999477754 | NA |
| ASV_16s_25564 | 0.085474866 | 0.310970549  | 3.551350563 | 0.505168153 | 0.999427337 | NA |
| ASV_16s_25565 | 0.087154999 | 0.310969557  | 3.551336027 | 0.512176608 | 0.999400663 | NA |
| ASV_16s_25566 | 0.087154999 | 0.310969557  | 3.551336027 | 0.512176608 | 0.999400663 | NA |
| ASV_16s_25567 | 0.087154999 | 0.310969557  | 3.551336027 | 0.512176608 | 0.999400663 | NA |
| ASV_16s_25568 | 0.087154999 | 0.310969557  | 3.551336027 | 0.512176608 | 0.999400663 | NA |
| ASV_16s_25569 | 0.087154999 | 0.310969557  | 3.551336027 | 0.512176608 | 0.999400663 | NA |
| ASV_16s_25570 | 0.088626187 | 0.310968769  | 3.551323749 | 0.518356296 | 0.999376453 | NA |
| ASV_16s_25571 | 0.088626187 | 0.310968769  | 3.551323749 | 0.518356296 | 0.999376453 | NA |
| ASV_16s_25572 | 0.088626187 | 0.310968769  | 3.551323749 | 0.518356296 | 0.999376453 | NA |
| ASV_16s_25573 | 0.088626187 | 0.310968769  | 3.551323749 | 0.518356296 | 0.999376453 | NA |
| ASV_16s_25574 | 0.075995204 | 0.310976367  | 3.551444434 | 0.466775995 | 0.99955927  | NA |
| ASV_16s_25575 | 0.075995204 | 0.310976367  | 3.551444434 | 0.466775995 | 0.99955927  | NA |
| ASV_16s_25576 | 0.086879133 | 0.310969708  | 3.551338375 | 0.511022445 | 0.999405112 | NA |
| ASV_16s_25577 | 0.086879133 | 0.310969708  | 3.551338375 | 0.511022445 | 0.999405112 | NA |
| ASV_16s_25578 | 0.086879133 | 0.310969708  | 3.551338375 | 0.511022445 | 0.999405112 | NA |
| ASV_16s_25579 | 0.086879133 | 0.310969708  | 3.551338375 | 0.511022445 | 0.999405112 | NA |
| ASV_16s_25580 | 0.086879133 | 0.310969708  | 3.551338375 | 0.511022445 | 0.999405112 | NA |
| ASV_16s_25581 | 0.086879133 | 0.310969708  | 3.551338375 | 0.511022445 | 0.999405112 | NA |
| ASV_16s_25582 | 0.05379341  | 0.595161234  | 3.551059439 | 0.196177867 | 0.999976452 | NA |
| ASV_16s_25583 | 0.05379341  | 0.595161234  | 3.551059439 | 0.196177867 | 0.999976452 | NA |
| ASV_16s_25584 | 0.05379341  | 0.595161234  | 3.551059439 | 0.196177867 | 0.999976452 | NA |
| ASV_16s_25585 | 0.077951129 | 0.686240956  | 3.551401313 | 0.436159699 | 0.999648298 | NA |
| ASV_16s_25586 | 0.077951129 | 0.686240956  | 3.551401313 | 0.436159699 | 0.999648298 | NA |
| ASV_16s_25587 | 0.090898514 | 0.686611047  | 3.551282055 | 0.480443816 | 0.999514984 | NA |
| ASV_16s_25588 | 0.090898514 | 0.686611047  | 3.551282055 | 0.480443816 | 0.999514984 | NA |
| ASV_16s_25589 | 0.078485454 | 0.856199994  | 3.551869247 | 0.212928851 | 0.999968834 | NA |
| ASV_16s_25590 | 0.107656946 | 0.022215273  | 3.551920207 | 0.378281481 | 0.999781495 | NA |
| ASV_16s_25591 | 0.074047271 | -0.199681114 | 3.55186226  | 0.220997584 | 0.999964611 | NA |

|               |             |              |             |             |                |
|---------------|-------------|--------------|-------------|-------------|----------------|
| ASV_16s_25592 | 0.077259503 | -0.052902735 | 3.551466258 | 0.461687759 | 0.999575025 NA |
| ASV_16s_25593 | 0.076085311 | 0.33999792   | 3.551991764 | 0.302475533 | 0.999897142 NA |
| ASV_16s_25594 | 0.072787474 | 0.561910117  | 3.551863618 | 0.301806226 | 0.99989791 NA  |
| ASV_16s_25595 | 0.101236347 | 0.678145861  | 3.551794243 | 0.361672092 | 0.99981207 NA  |
| ASV_16s_25596 | 0.076188859 | 0.340769957  | 3.551983318 | 0.312671527 | 0.999884941 NA |
| ASV_16s_25597 | 0.088023696 | 1.076361911  | 3.551625514 | 0.172013404 | 0.999984996 NA |
| ASV_16s_25598 | 0.088616243 | 0.307851658  | 3.551555536 | 0.490510902 | 0.99948049 NA  |
| ASV_16s_25599 | 0.095733192 | 0.687092804  | 3.551656537 | 0.4760629   | 0.999529495 NA |
| ASV_16s_25600 | 0.090712676 | 0.833496429  | 3.551914965 | 0.296963528 | 0.999903349 NA |
| ASV_16s_25601 | 0.113939403 | 0.681995285  | 3.551728591 | 0.5311846   | 0.999324095 NA |
| ASV_16s_25602 | 0.08767814  | 0.892940988  | 3.551727717 | 0.326120045 | 0.99986736 NA  |
| ASV_16s_25603 | 0.077127361 | 0.100423467  | 3.551801123 | 0.462759981 | 0.999571738 NA |
| ASV_16s_25604 | 0.069499982 | 0.539464061  | 3.551787496 | 0.420893221 | 0.999687699 NA |
| ASV_16s_25605 | 0.094233583 | 0.904821342  | 3.551732926 | 0.365761162 | 0.999804836 NA |
| ASV_16s_25606 | 0.170268542 | 1.086395882  | 3.551220414 | 0.600343828 | 0.998989857 NA |
| ASV_16s_25607 | 0.105045934 | 0.297602374  | 3.551913782 | 0.432083242 | 0.999659134 NA |
| ASV_16s_25608 | 0.127086228 | 0.994263803  | 3.551515685 | 0.457324733 | 0.999588225 NA |
| ASV_16s_25609 | 0.127086228 | 0.994263803  | 3.551515685 | 0.457324733 | 0.999588225 NA |
| ASV_16s_25610 | 0.089140991 | 0.888427646  | 3.551758931 | 0.353423743 | 0.999826096 NA |
| ASV_16s_25611 | 0.089140991 | 0.888427646  | 3.551758931 | 0.353423743 | 0.999826096 NA |
| ASV_16s_25612 | 0.087935237 | 0.829217853  | 3.551662476 | 0.335106407 | 0.999854626 NA |
| ASV_16s_25613 | 0.085876248 | 0.823914669  | 3.551669645 | 0.330456021 | 0.999861316 NA |
| ASV_16s_25614 | 0.085876248 | 0.823914669  | 3.551669645 | 0.330456021 | 0.999861316 NA |
| ASV_16s_25615 | 0.136373235 | 0.281527317  | 3.55166494  | 0.553843339 | 0.999224473 NA |
| ASV_16s_25616 | 0.034340363 | 0.298254589  | 3.551945329 | 0.200120507 | 0.999974792 NA |
| ASV_16s_25617 | 0.096858378 | 0.284864088  | 3.551756281 | 0.410642571 | 0.999712385 NA |
| ASV_16s_25618 | 0.153564061 | -0.462479576 | 3.551327815 | 0.619719139 | 0.998879443 NA |
| ASV_16s_25619 | 0.022205701 | 0.011811892  | 3.551907633 | 0.144924996 | 0.999991676 NA |
| ASV_16s_25620 | 0.194457332 | 1.035831858  | 3.551140098 | 0.668252346 | 0.998567956 NA |
| ASV_16s_25621 | 0.194457332 | 1.035831858  | 3.551140098 | 0.668252346 | 0.998567956 NA |
| ASV_16s_25622 | 0.068169245 | 0.773444269  | 3.551741833 | 0.295908467 | 0.999904506 NA |
| ASV_16s_25623 | 0.156676001 | -0.507553037 | 3.551058008 | 0.631244044 | 0.998810071 NA |
| ASV_16s_25624 | 0.156676001 | -0.507553037 | 3.551058008 | 0.631244044 | 0.998810071 NA |
| ASV_16s_25625 | 0.156676001 | -0.507553037 | 3.551058008 | 0.631244044 | 0.998810071 NA |
| ASV_16s_25626 | 0.156676001 | -0.507553037 | 3.551058008 | 0.631244044 | 0.998810071 NA |
| ASV_16s_25627 | 0.156676001 | -0.507553037 | 3.551058008 | 0.631244044 | 0.998810071 NA |
| ASV_16s_25628 | 0.156676001 | -0.507553037 | 3.551058008 | 0.631244044 | 0.998810071 NA |
| ASV_16s_25629 | 0.137286093 | 0.056423288  | 3.551748092 | 0.517166999 | 0.999381163 NA |
| ASV_16s_25630 | 0.138936576 | 0.062578045  | 3.551743281 | 0.553257706 | 0.999227166 NA |
| ASV_16s_25631 | 0.123268311 | -0.367562382 | 3.551403007 | 0.413163773 | 0.999706443 NA |
| ASV_16s_25632 | 0.160378886 | 1.142279241  | 3.551208084 | 0.570996009 | 0.999142775 NA |
| ASV_16s_25633 | 0.13868469  | 0.364588171  | 3.551519973 | 0.490241817 | 0.999481433 NA |
| ASV_16s_25634 | 0.13868469  | 0.364588171  | 3.551519973 | 0.490241817 | 0.999481433 NA |
| ASV_16s_25635 | 0.100997958 | 0.326829858  | 3.551950081 | 0.292828884 | 0.99990783 NA  |
| ASV_16s_25636 | 0.090719758 | 0.317795755  | 3.551773001 | 0.357721164 | 0.999818882 NA |
| ASV_16s_25637 | 0.091107688 | -0.38290869  | 3.551317022 | 0.330841208 | 0.99986077 NA  |
| ASV_16s_25638 | 0.091107688 | -0.38290869  | 3.551317022 | 0.330841208 | 0.99986077 NA  |
| ASV_16s_25639 | 0.101021206 | 1.024857953  | 3.55132401  | 0.328531348 | 0.999864022 NA |
| ASV_16s_25640 | 0.101021206 | 1.024857953  | 3.55132401  | 0.328531348 | 0.999864022 NA |
| ASV_16s_25641 | 0.101021206 | 1.024857953  | 3.55132401  | 0.328531348 | 0.999864022 NA |
| ASV_16s_25642 | 0.101021206 | 1.024857953  | 3.55132401  | 0.328531348 | 0.999864022 NA |
| ASV_16s_25643 | 0.101021206 | 1.024857953  | 3.55132401  | 0.328531348 | 0.999864022 NA |
| ASV_16s_25644 | 0.101021206 | 1.024857953  | 3.55132401  | 0.328531348 | 0.999864022 NA |
| ASV_16s_25645 | 0.101021206 | 1.024857953  | 3.55132401  | 0.328531348 | 0.999864022 NA |
| ASV_16s_25646 | 0.101021206 | 1.024857953  | 3.55132401  | 0.328531348 | 0.999864022 NA |
| ASV_16s_25647 | 0.113277866 | 0.466674832  | 3.551346776 | 0.487986625 | 0.999489291 NA |
| ASV_16s_25648 | 0.057565175 | -0.071515984 | 3.551434946 | 0.412934347 | 0.999706987 NA |
| ASV_16s_25649 | 0.057565175 | -0.071515984 | 3.551434946 | 0.412934347 | 0.999706987 NA |
| ASV_16s_25650 | 0.057565175 | -0.071515984 | 3.551434946 | 0.412934347 | 0.999706987 NA |
| ASV_16s_25651 | 0.124836543 | 0.365535099  | 3.551073026 | 0.669781351 | 0.998557302 NA |
| ASV_16s_25652 | 0.134397884 | 0.402324945  | 3.551006212 | 0.692343339 | 0.998393878 NA |
| ASV_16s_25653 | 0.127066608 | -0.02807017  | 3.551157571 | 0.769891214 | 0.99773922 NA  |
| ASV_16s_25654 | 0.127066608 | -0.02807017  | 3.551157571 | 0.769891214 | 0.99773922 NA  |
| ASV_16s_25655 | 0.127066608 | -0.02807017  | 3.551157571 | 0.769891214 | 0.99773922 NA  |
| ASV_16s_25656 | 0.127066608 | -0.02807017  | 3.551157571 | 0.769891214 | 0.99773922 NA  |
| ASV_16s_25657 | 0.127066608 | -0.02807017  | 3.551157571 | 0.769891214 | 0.99773922 NA  |
| ASV_16s_25658 | 0.127066608 | -0.02807017  | 3.551157571 | 0.769891214 | 0.99773922 NA  |

|               |             |              |             |             |                |
|---------------|-------------|--------------|-------------|-------------|----------------|
| ASV_16s_25659 | 0.127066608 | -0.02807017  | 3.551157571 | 0.769891214 | 0.99773922 NA  |
| ASV_16s_25660 | 0.127066608 | -0.02807017  | 3.551157571 | 0.769891214 | 0.99773922 NA  |
| ASV_16s_25661 | 0.103971437 | 0.422453998  | 3.551359244 | 0.77702386  | 0.997671423 NA |
| ASV_16s_25662 | 0.083493479 | 0.24194773   | 3.551556775 | 0.684475766 | 0.998452195 NA |
| ASV_16s_25663 | 0.07594918  | -0.016271858 | 3.551547731 | 0.539602782 | 0.999288164 NA |
| ASV_16s_25664 | 0.07594918  | -0.016271858 | 3.551547731 | 0.539602782 | 0.999288164 NA |
| ASV_16s_25665 | 0.07594918  | -0.016271858 | 3.551547731 | 0.539602782 | 0.999288164 NA |
| ASV_16s_25666 | 0.07594918  | -0.016271858 | 3.551547731 | 0.539602782 | 0.999288164 NA |
| ASV_16s_25667 | 0.07594918  | -0.016271858 | 3.551547731 | 0.539602782 | 0.999288164 NA |
| ASV_16s_25668 | 0.07594918  | -0.016271858 | 3.551547731 | 0.539602782 | 0.999288164 NA |
| ASV_16s_25669 | 0.086781604 | -0.072258347 | 3.551205527 | 0.551032694 | 0.999237337 NA |
| ASV_16s_25670 | 0.086781604 | -0.072258347 | 3.551205527 | 0.551032694 | 0.999237337 NA |
| ASV_16s_25671 | 0.086781604 | -0.072258347 | 3.551205527 | 0.551032694 | 0.999237337 NA |
| ASV_16s_25672 | 0.086781604 | -0.072258347 | 3.551205527 | 0.551032694 | 0.999237337 NA |
| ASV_16s_25673 | 0.086781604 | -0.072258347 | 3.551205527 | 0.551032694 | 0.999237337 NA |
| ASV_16s_25674 | 0.086781604 | -0.072258347 | 3.551205527 | 0.551032694 | 0.999237337 NA |
| ASV_16s_25675 | 0.063381778 | -0.062666656 | 3.551435065 | 0.456826334 | 0.999589715 NA |
| ASV_16s_25676 | 0.063381778 | -0.062666656 | 3.551435065 | 0.456826334 | 0.999589715 NA |
| ASV_16s_25677 | 0.063381778 | -0.062666656 | 3.551435065 | 0.456826334 | 0.999589715 NA |
| ASV_16s_25678 | 0.063381778 | -0.062666656 | 3.551435065 | 0.456826334 | 0.999589715 NA |
| ASV_16s_25679 | 0.063381778 | -0.062666656 | 3.551435065 | 0.456826334 | 0.999589715 NA |
| ASV_16s_25680 | 0.078057572 | 0.160796135  | 3.551529251 | 0.473566712 | 0.999537629 NA |
| ASV_16s_25681 | 0.062242914 | -0.061857145 | 3.551449622 | 0.452623117 | 0.999602132 NA |
| ASV_16s_25682 | 0.062242914 | -0.061857145 | 3.551449622 | 0.452623117 | 0.999602132 NA |
| ASV_16s_25683 | 0.062242914 | -0.061857145 | 3.551449622 | 0.452623117 | 0.999602132 NA |
| ASV_16s_25684 | 0.062242914 | -0.061857145 | 3.551449622 | 0.452623117 | 0.999602132 NA |
| ASV_16s_25685 | 0.062242914 | -0.061857145 | 3.551449622 | 0.452623117 | 0.999602132 NA |
| ASV_16s_25686 | 0.062242914 | -0.061857145 | 3.551449622 | 0.452623117 | 0.999602132 NA |
| ASV_16s_25687 | 0.062242914 | -0.061857145 | 3.551449622 | 0.452623117 | 0.999602132 NA |
| ASV_16s_25688 | 0.062242914 | -0.061857145 | 3.551449622 | 0.452623117 | 0.999602132 NA |
| ASV_16s_25689 | 0.105045934 | -0.072678792 | 3.551086322 | 0.631863909 | 0.99880626 NA  |
| ASV_16s_25690 | 0.077228565 | -0.07030684  | 3.551286734 | 0.511042599 | 0.999405035 NA |
| ASV_16s_25691 | 0.077228565 | -0.07030684  | 3.551286734 | 0.511042599 | 0.999405035 NA |
| ASV_16s_25692 | 0.077228565 | -0.07030684  | 3.551286734 | 0.511042599 | 0.999405035 NA |
| ASV_16s_25693 | 0.086636937 | 0.352253046  | 3.551664707 | 0.570630626 | 0.999144573 NA |
| ASV_16s_25694 | 0.086636937 | 0.352253046  | 3.551664707 | 0.570630626 | 0.999144573 NA |
| ASV_16s_25695 | 0.086636937 | 0.352253046  | 3.551664707 | 0.570630626 | 0.999144573 NA |
| ASV_16s_25696 | 0.086636937 | 0.352253046  | 3.551664707 | 0.570630626 | 0.999144573 NA |
| ASV_16s_25697 | 0.086636937 | 0.352253046  | 3.551664707 | 0.570630626 | 0.999144573 NA |
| ASV_16s_25698 | 0.086636937 | 0.352253046  | 3.551664707 | 0.570630626 | 0.999144573 NA |
| ASV_16s_25699 | 0.086636937 | 0.352253046  | 3.551664707 | 0.570630626 | 0.999144573 NA |
| ASV_16s_25700 | 0.086636937 | 0.352253046  | 3.551664707 | 0.570630626 | 0.999144573 NA |
| ASV_16s_25701 | 0.086636937 | 0.352253046  | 3.551664707 | 0.570630626 | 0.999144573 NA |
| ASV_16s_25702 | 0.086636937 | 0.352253046  | 3.551664707 | 0.570630626 | 0.999144573 NA |
| ASV_16s_25703 | 0.086636937 | 0.352253046  | 3.551664707 | 0.570630626 | 0.999144573 NA |
| ASV_16s_25704 | 0.086636937 | 0.352253046  | 3.551664707 | 0.570630626 | 0.999144573 NA |
| ASV_16s_25705 | 0.082628163 | 0.67944527   | 3.551743122 | 0.47204552  | 0.999542538 NA |
| ASV_16s_25706 | 0.142270148 | 0.360257018  | 3.551306764 | 0.824991659 | 0.997180461 NA |
| ASV_16s_25707 | 0.142270148 | 0.360257018  | 3.551306764 | 0.824991659 | 0.997180461 NA |
| ASV_16s_25708 | 0.142270148 | 0.360257018  | 3.551306764 | 0.824991659 | 0.997180461 NA |
| ASV_16s_25709 | 0.122279879 | 0.345062131  | 3.551822938 | 0.537102871 | 0.999298966 NA |
| ASV_16s_25710 | 0.226684816 | 0.360337551  | 3.551043019 | 1.247937546 | 0.98978094 NA  |
| ASV_16s_25711 | 0.077017244 | 0.347931013  | 3.551737005 | 0.530797764 | 0.999325716 NA |
| ASV_16s_25712 | 0.100947477 | 0.61119868   | 3.55085068  | 0.363158983 | 0.999809462 NA |
| ASV_16s_25713 | 0.077017244 | 0.347931013  | 3.551737005 | 0.530797764 | 0.999325716 NA |
| ASV_16s_25714 | 0.077017244 | 0.347931013  | 3.551737005 | 0.530797764 | 0.999325716 NA |
| ASV_16s_25715 | 0.077017244 | 0.347931013  | 3.551737005 | 0.530797764 | 0.999325716 NA |
| ASV_16s_25716 | 0.077017244 | 0.347931013  | 3.551737005 | 0.530797764 | 0.999325716 NA |
| ASV_16s_25717 | 0.077017244 | 0.347931013  | 3.551737005 | 0.530797764 | 0.999325716 NA |
| ASV_16s_25718 | 0.077017244 | 0.347931013  | 3.551737005 | 0.530797764 | 0.999325716 NA |
| ASV_16s_25719 | 0.077017244 | 0.347931013  | 3.551737005 | 0.530797764 | 0.999325716 NA |
| ASV_16s_25720 | 0.077017244 | 0.347931013  | 3.551737005 | 0.530797764 | 0.999325716 NA |
| ASV_16s_25721 | 0.077017244 | 0.347931013  | 3.551737005 | 0.530797764 | 0.999325716 NA |
| ASV_16s_25722 | 0.077017244 | 0.347931013  | 3.551737005 | 0.530797764 | 0.999325716 NA |
| ASV_16s_25723 | 0.077017244 | 0.347931013  | 3.551737005 | 0.530797764 | 0.999325716 NA |
| ASV_16s_25724 | 0.077017244 | 0.347931013  | 3.551737005 | 0.530797764 | 0.999325716 NA |
| ASV_16s_25725 | 0.077017244 | 0.347931013  | 3.551737005 | 0.530797764 | 0.999325716 NA |

|               |             |             |             |             |                |
|---------------|-------------|-------------|-------------|-------------|----------------|
| ASV_16s_25726 | 0.077017244 | 0.347931013 | 3.551737005 | 0.530797764 | 0.999325716 NA |
| ASV_16s_25727 | 0.077017244 | 0.347931013 | 3.551737005 | 0.530797764 | 0.999325716 NA |
| ASV_16s_25728 | 0.077017244 | 0.347931013 | 3.551737005 | 0.530797764 | 0.999325716 NA |
| ASV_16s_25729 | 0.077017244 | 0.347931013 | 3.551737005 | 0.530797764 | 0.999325716 NA |
| ASV_16s_25730 | 0.077017244 | 0.347931013 | 3.551737005 | 0.530797764 | 0.999325716 NA |
| ASV_16s_25731 | 0.077017244 | 0.347931013 | 3.551737005 | 0.530797764 | 0.999325716 NA |
| ASV_16s_25732 | 0.077017244 | 0.347931013 | 3.551737005 | 0.530797764 | 0.999325716 NA |
| ASV_16s_25733 | 0.141147507 | 0.360255309 | 3.551312373 | 0.81958522  | 0.997238904 NA |
| ASV_16s_25734 | 0.099790825 | 0.315940441 | 3.551303764 | 0.58923296  | 0.999049744 NA |
| ASV_16s_25735 | 0.099790825 | 0.315940441 | 3.551303764 | 0.58923296  | 0.999049744 NA |
| ASV_16s_25736 | 0.099790825 | 0.315940441 | 3.551303764 | 0.58923296  | 0.999049744 NA |
| ASV_16s_25737 | 0.099790825 | 0.315940441 | 3.551303764 | 0.58923296  | 0.999049744 NA |
| ASV_16s_25738 | 0.099790825 | 0.315940441 | 3.551303764 | 0.58923296  | 0.999049744 NA |
| ASV_16s_25739 | 0.099790825 | 0.315940441 | 3.551303764 | 0.58923296  | 0.999049744 NA |
| ASV_16s_25740 | 0.099790825 | 0.315940441 | 3.551303764 | 0.58923296  | 0.999049744 NA |
| ASV_16s_25741 | 0.098268477 | 0.315940457 | 3.551314872 | 0.58235908  | 0.999085569 NA |
| ASV_16s_25742 | 0.086258884 | 0.315939334 | 3.551414646 | 0.531169142 | 0.99932416 NA  |
| ASV_16s_25743 | 0.086258884 | 0.315939334 | 3.551414646 | 0.531169142 | 0.99932416 NA  |
| ASV_16s_25744 | 0.086258884 | 0.315939334 | 3.551414646 | 0.531169142 | 0.99932416 NA  |
| ASV_16s_25745 | 0.086258884 | 0.315939334 | 3.551414646 | 0.531169142 | 0.99932416 NA  |
| ASV_16s_25746 | 0.086258884 | 0.315939334 | 3.551414646 | 0.531169142 | 0.99932416 NA  |
| ASV_16s_25747 | 0.086258884 | 0.315939334 | 3.551414646 | 0.531169142 | 0.99932416 NA  |
| ASV_16s_25748 | 0.086258884 | 0.315939334 | 3.551414646 | 0.531169142 | 0.99932416 NA  |
| ASV_16s_25749 | 0.083521319 | 0.315940453 | 3.551441448 | 0.519826265 | 0.999370599 NA |
| ASV_16s_25750 | 0.133916667 | 0.315940081 | 3.551122717 | 0.746142848 | 0.997955533 NA |
| ASV_16s_25751 | 0.133916667 | 0.315940081 | 3.551122717 | 0.746142848 | 0.997955533 NA |
| ASV_16s_25752 | 0.133916667 | 0.315940081 | 3.551122717 | 0.746142848 | 0.997955533 NA |
| ASV_16s_25753 | 0.133916667 | 0.315940081 | 3.551122717 | 0.746142848 | 0.997955533 NA |
| ASV_16s_25754 | 0.080441559 | 0.315940689 | 3.551473696 | 0.507260321 | 0.99941946 NA  |
| ASV_16s_25755 | 0.080441559 | 0.315940689 | 3.551473696 | 0.507260321 | 0.99941946 NA  |
| ASV_16s_25756 | 0.080441559 | 0.315940689 | 3.551473696 | 0.507260321 | 0.99941946 NA  |
| ASV_16s_25757 | 0.080441559 | 0.315940689 | 3.551473696 | 0.507260321 | 0.99941946 NA  |
| ASV_16s_25758 | 0.080441559 | 0.315940689 | 3.551473696 | 0.507260321 | 0.99941946 NA  |
| ASV_16s_25759 | 0.080441559 | 0.315940689 | 3.551473696 | 0.507260321 | 0.99941946 NA  |
| ASV_16s_25760 | 0.080441559 | 0.315940689 | 3.551473696 | 0.507260321 | 0.99941946 NA  |
| ASV_16s_25761 | 0.080441559 | 0.315940689 | 3.551473696 | 0.507260321 | 0.99941946 NA  |
| ASV_16s_25762 | 0.080441559 | 0.315940689 | 3.551473696 | 0.507260321 | 0.99941946 NA  |
| ASV_16s_25763 | 0.080441559 | 0.315940689 | 3.551473696 | 0.507260321 | 0.99941946 NA  |
| ASV_16s_25764 | 0.080441559 | 0.315940689 | 3.551473696 | 0.507260321 | 0.99941946 NA  |
| ASV_16s_25765 | 0.080441559 | 0.315940689 | 3.551473696 | 0.507260321 | 0.99941946 NA  |
| ASV_16s_25766 | 0.080441559 | 0.315940689 | 3.551473696 | 0.507260321 | 0.99941946 NA  |
| ASV_16s_25767 | 0.080441559 | 0.315940689 | 3.551473696 | 0.507260321 | 0.99941946 NA  |
| ASV_16s_25768 | 0.080441559 | 0.315940689 | 3.551473696 | 0.507260321 | 0.99941946 NA  |
| ASV_16s_25769 | 0.080441559 | 0.315940689 | 3.551473696 | 0.507260321 | 0.99941946 NA  |
| ASV_16s_25770 | 0.080441559 | 0.315940689 | 3.551473696 | 0.507260321 | 0.99941946 NA  |
| ASV_16s_25771 | 0.080441559 | 0.315940689 | 3.551473696 | 0.507260321 | 0.99941946 NA  |
| ASV_16s_25772 | 0.080441559 | 0.315940689 | 3.551473696 | 0.507260321 | 0.99941946 NA  |
| ASV_16s_25773 | 0.080441559 | 0.315940689 | 3.551473696 | 0.507260321 | 0.99941946 NA  |
| ASV_16s_25774 | 0.15144269  | 0.315939975 | 3.55106121  | 0.830605571 | 0.997118923 NA |
| ASV_16s_25775 | 0.15144269  | 0.315939975 | 3.55106121  | 0.830605571 | 0.997118923 NA |
| ASV_16s_25776 | 0.108310625 | 0.595810571 | 3.550804056 | 0.401512477 | 0.999733214 NA |
| ASV_16s_25777 | 0.108310625 | 0.595810571 | 3.550804056 | 0.401512477 | 0.999733214 NA |
| ASV_16s_25778 | 0.076607475 | 0.686195497 | 3.551415968 | 0.431777975 | 0.999659936 NA |
| ASV_16s_25779 | 0.076607475 | 0.686195497 | 3.551415968 | 0.431777975 | 0.999659936 NA |
| ASV_16s_25780 | 0.076607475 | 0.686195497 | 3.551415968 | 0.431777975 | 0.999659936 NA |
| ASV_16s_25781 | 0.076607475 | 0.686195497 | 3.551415968 | 0.431777975 | 0.999659936 NA |
| ASV_16s_25782 | 0.138396762 | 0.687383849 | 3.551034192 | 0.663862918 | 0.998598252 NA |
| ASV_16s_25783 | 0.138396762 | 0.687383849 | 3.551034192 | 0.663862918 | 0.998598252 NA |
| ASV_16s_25784 | 0.138396762 | 0.687383849 | 3.551034192 | 0.663862918 | 0.998598252 NA |
| ASV_16s_25785 | 0.138396762 | 0.687383849 | 3.551034192 | 0.663862918 | 0.998598252 NA |
| ASV_16s_25786 | 0.138396762 | 0.687383849 | 3.551034192 | 0.663862918 | 0.998598252 NA |
| ASV_16s_25787 | 0.138396762 | 0.687383849 | 3.551034192 | 0.663862918 | 0.998598252 NA |
| ASV_16s_25788 | 0.138396762 | 0.687383849 | 3.551034192 | 0.663862918 | 0.998598252 NA |
| ASV_16s_25789 | 0.119583548 | 1.000764465 | 3.551510917 | 0.456672442 | 0.999590174 NA |
| ASV_16s_25790 | 0.170268542 | 0.733434196 | 3.551206782 | 0.862694231 | 0.99675026 NA  |
| ASV_16s_25791 | 0.136463354 | 0.730301299 | 3.551355227 | 0.720375372 | 0.998174237 NA |
| ASV_16s_25792 | 0.14146495  | 0.731190063 | 3.551329701 | 0.741193312 | 0.997998819 NA |



|               |             |             |             |             |                |
|---------------|-------------|-------------|-------------|-------------|----------------|
| ASV_16s_25860 | 0.09893082  | 0.690884016 | 3.551296711 | 0.533953453 | 0.999312416 NA |
| ASV_16s_25861 | 0.09893082  | 0.690884016 | 3.551296711 | 0.533953453 | 0.999312416 NA |
| ASV_16s_25862 | 0.09893082  | 0.690884016 | 3.551296711 | 0.533953453 | 0.999312416 NA |
| ASV_16s_25863 | 0.09893082  | 0.690884016 | 3.551296711 | 0.533953453 | 0.999312416 NA |
| ASV_16s_25864 | 0.091317595 | 0.6888817   | 3.55135396  | 0.506158607 | 0.999423617 NA |
| ASV_16s_25865 | 0.085879577 | 0.686619075 | 3.551398976 | 0.48685756  | 0.999493195 NA |
| ASV_16s_25866 | 0.101737927 | 0.691580353 | 3.551277673 | 0.544412462 | 0.999267065 NA |
| ASV_16s_25867 | 0.101737927 | 0.691580353 | 3.551277673 | 0.544412462 | 0.999267065 NA |
| ASV_16s_25868 | 0.101737927 | 0.691580353 | 3.551277673 | 0.544412462 | 0.999267065 NA |
| ASV_16s_25869 | 0.101737927 | 0.691580353 | 3.551277673 | 0.544412462 | 0.999267065 NA |
| ASV_16s_25870 | 0.101737927 | 0.691580353 | 3.551277673 | 0.544412462 | 0.999267065 NA |
| ASV_16s_25871 | 0.101737927 | 0.691580353 | 3.551277673 | 0.544412462 | 0.999267065 NA |
| ASV_16s_25872 | 0.101737927 | 0.691580353 | 3.551277673 | 0.544412462 | 0.999267065 NA |
| ASV_16s_25873 | 0.101737927 | 0.691580353 | 3.551277673 | 0.544412462 | 0.999267065 NA |
| ASV_16s_25874 | 0.101737927 | 0.691580353 | 3.551277673 | 0.544412462 | 0.999267065 NA |
| ASV_16s_25875 | 0.101737927 | 0.691580353 | 3.551277673 | 0.544412462 | 0.999267065 NA |
| ASV_16s_25876 | 0.101737927 | 0.691580353 | 3.551277673 | 0.544412462 | 0.999267065 NA |
| ASV_16s_25877 | 0.101737927 | 0.691580353 | 3.551277673 | 0.544412462 | 0.999267065 NA |
| ASV_16s_25878 | 0.101737927 | 0.691580353 | 3.551277673 | 0.544412462 | 0.999267065 NA |
| ASV_16s_25879 | 0.101737927 | 0.691580353 | 3.551277673 | 0.544412462 | 0.999267065 NA |
| ASV_16s_25880 | 0.101737927 | 0.691580353 | 3.551277673 | 0.544412462 | 0.999267065 NA |
| ASV_16s_25881 | 0.101737927 | 0.691580353 | 3.551277673 | 0.544412462 | 0.999267065 NA |
| ASV_16s_25882 | 0.101737927 | 0.691580353 | 3.551277673 | 0.544412462 | 0.999267065 NA |
| ASV_16s_25883 | 0.101737927 | 0.691580353 | 3.551277673 | 0.544412462 | 0.999267065 NA |
| ASV_16s_25884 | 0.101737927 | 0.691580353 | 3.551277673 | 0.544412462 | 0.999267065 NA |
| ASV_16s_25885 | 0.101737927 | 0.691580353 | 3.551277673 | 0.544412462 | 0.999267065 NA |
| ASV_16s_25886 | 0.107463035 | 0.691837943 | 3.551239726 | 0.565937326 | 0.999167445 NA |
| ASV_16s_25887 | 0.10841722  | 0.691858156 | 3.551233744 | 0.569566159 | 0.999149797 NA |
| ASV_16s_25888 | 0.091716107 | 0.68899029  | 3.551350753 | 0.50757744  | 0.99941826 NA  |
| ASV_16s_25889 | 0.087957924 | 0.687662518 | 3.551381556 | 0.494177995 | 0.999467521 NA |
| ASV_16s_25890 | 0.080441559 | 0.683754166 | 3.551448447 | 0.468100725 | 0.999555104 NA |
| ASV_16s_25891 | 0.080441559 | 0.683754166 | 3.551448447 | 0.468100725 | 0.999555104 NA |
| ASV_16s_25892 | 0.080441559 | 0.683754166 | 3.551448447 | 0.468100725 | 0.999555104 NA |
| ASV_16s_25893 | 0.080441559 | 0.683754166 | 3.551448447 | 0.468100725 | 0.999555104 NA |
| ASV_16s_25894 | 0.080441559 | 0.683754166 | 3.551448447 | 0.468100725 | 0.999555104 NA |
| ASV_16s_25895 | 0.080441559 | 0.683754166 | 3.551448447 | 0.468100725 | 0.999555104 NA |
| ASV_16s_25896 | 0.080441559 | 0.683754166 | 3.551448447 | 0.468100725 | 0.999555104 NA |
| ASV_16s_25897 | 0.080441559 | 0.683754166 | 3.551448447 | 0.468100725 | 0.999555104 NA |
| ASV_16s_25898 | 0.080441559 | 0.683754166 | 3.551448447 | 0.468100725 | 0.999555104 NA |
| ASV_16s_25899 | 0.080441559 | 0.683754166 | 3.551448447 | 0.468100725 | 0.999555104 NA |
| ASV_16s_25900 | 0.080441559 | 0.683754166 | 3.551448447 | 0.468100725 | 0.999555104 NA |
| ASV_16s_25901 | 0.080441559 | 0.683754166 | 3.551448447 | 0.468100725 | 0.999555104 NA |
| ASV_16s_25902 | 0.080441559 | 0.683754166 | 3.551448447 | 0.468100725 | 0.999555104 NA |
| ASV_16s_25903 | 0.080441559 | 0.683754166 | 3.551448447 | 0.468100725 | 0.999555104 NA |
| ASV_16s_25904 | 0.118172901 | 0.692048934 | 3.551178044 | 0.607314454 | 0.998951018 NA |
| ASV_16s_25905 | 0.118172901 | 0.692048934 | 3.551178044 | 0.607314454 | 0.998951018 NA |
| ASV_16s_25906 | 0.118172901 | 0.692048934 | 3.551178044 | 0.607314454 | 0.998951018 NA |
| ASV_16s_25907 | 0.117959067 | 0.692045129 | 3.551179167 | 0.606476452 | 0.99895574 NA  |
| ASV_16s_25908 | 0.117959067 | 0.692045129 | 3.551179167 | 0.606476452 | 0.99895574 NA  |
| ASV_16s_25909 | 0.117959067 | 0.692045129 | 3.551179167 | 0.606476452 | 0.99895574 NA  |
| ASV_16s_25910 | 0.12004122  | 0.976872857 | 3.551564203 | 0.435213377 | 0.999650834 NA |
| ASV_16s_25911 | 0.057759489 | 0.588012567 | 3.551969716 | 0.186806554 | 0.999980087 NA |
| ASV_16s_25912 | 0.129539739 | 0.999970097 | 3.551499204 | 0.465682951 | 0.999562688 NA |
| ASV_16s_25913 | 0.098930916 | 0.298839078 | 3.551931114 | 0.409788407 | 0.99971438 NA  |
| ASV_16s_25914 | 0.065273945 | 0.305654285 | 3.551962582 | 0.310491079 | 0.99988763 NA  |
| ASV_16s_25915 | 0.065273945 | 0.305654285 | 3.551962582 | 0.310491079 | 0.99988763 NA  |
| ASV_16s_25916 | 0.065273945 | 0.305654285 | 3.551962582 | 0.310491079 | 0.99988763 NA  |
| ASV_16s_25917 | 0.065273945 | 0.305654285 | 3.551962582 | 0.310491079 | 0.99988763 NA  |
| ASV_16s_25918 | 0.065273945 | 0.305654285 | 3.551962582 | 0.310491079 | 0.99988763 NA  |
| ASV_16s_25919 | 0.065273945 | 0.305654285 | 3.551962582 | 0.310491079 | 0.99988763 NA  |
| ASV_16s_25920 | 0.065273945 | 0.305654285 | 3.551962582 | 0.310491079 | 0.99988763 NA  |
| ASV_16s_25921 | 0.065273945 | 0.305654285 | 3.551962582 | 0.310491079 | 0.99988763 NA  |
| ASV_16s_25922 | 0.065273945 | 0.305654285 | 3.551962582 | 0.310491079 | 0.99988763 NA  |
| ASV_16s_25923 | 0.065273945 | 0.305654285 | 3.551962582 | 0.310491079 | 0.99988763 NA  |
| ASV_16s_25924 | 0.065273945 | 0.305654285 | 3.551962582 | 0.310491079 | 0.99988763 NA  |
| ASV_16s_25925 | 0.065273945 | 0.305654285 | 3.551962582 | 0.310491079 | 0.99988763 NA  |
| ASV_16s_25926 | 0.065273945 | 0.305654285 | 3.551962582 | 0.310491079 | 0.99988763 NA  |





|               |             |              |             |             |             |    |
|---------------|-------------|--------------|-------------|-------------|-------------|----|
| ASV_16s_25994 | 0.067086377 | 0.00375528   | 3.55183353  | 0.397228759 | 0.999742619 | NA |
| ASV_16s_25995 | 0.067086377 | 0.00375528   | 3.55183353  | 0.397228759 | 0.999742619 | NA |
| ASV_16s_25996 | 0.067086377 | 0.00375528   | 3.55183353  | 0.397228759 | 0.999742619 | NA |
| ASV_16s_25997 | 0.065313874 | 0.016450966  | 3.551842166 | 0.389895272 | 0.999758186 | NA |
| ASV_16s_25998 | 0.067345296 | -0.030522337 | 3.551817166 | 0.400078393 | 0.999736388 | NA |
| ASV_16s_25999 | 0.077678356 | -0.094747849 | 3.55174809  | 0.445507866 | 0.999622563 | NA |
| ASV_16s_26000 | 0.069954119 | -0.040743966 | 3.551808189 | 0.411247874 | 0.999710966 | NA |
| ASV_16s_26001 | 0.065319578 | -0.016649754 | 3.551828776 | 0.391906616 | 0.999753983 | NA |
| ASV_16s_26002 | 0.067604215 | -0.063741051 | 3.551800989 | 0.400415611 | 0.999735644 | NA |
| ASV_16s_26003 | 0.065325282 | -0.048979874 | 3.551813988 | 0.391497799 | 0.999754842 | NA |
| ASV_16s_26004 | 0.067604215 | -0.063741051 | 3.551800989 | 0.400415611 | 0.999735644 | NA |
| ASV_16s_26005 | 0.065325282 | -0.048979874 | 3.551813988 | 0.391497799 | 0.999754842 | NA |
| ASV_16s_26006 | 0.065325282 | -0.048979874 | 3.551813988 | 0.391497799 | 0.999754842 | NA |
| ASV_16s_26007 | 0.067604215 | -0.063741051 | 3.551800989 | 0.400415611 | 0.999735644 | NA |
| ASV_16s_26008 | 0.065330986 | -0.080511862 | 3.551800013 | 0.388545877 | 0.999760979 | NA |
| ASV_16s_26009 | 0.065330986 | -0.080511862 | 3.551800013 | 0.388545877 | 0.999760979 | NA |
| ASV_16s_26010 | 0.075871847 | -0.171155448 | 3.551712303 | 0.423156709 | 0.999682059 | NA |
| ASV_16s_26011 | 0.06533669  | -0.111385893 | 3.55178754  | 0.383130161 | 0.999771961 | NA |
| ASV_16s_26012 | 0.068122052 | -0.127467468 | 3.551773635 | 0.393212495 | 0.999751227 | NA |
| ASV_16s_26013 | 0.068380971 | -0.15874382  | 3.551759185 | 0.385733283 | 0.999766727 | NA |
| ASV_16s_26014 | 0.023334649 | -0.001779119 | 3.551925364 | 0.156564776 | 0.999989141 | NA |
| ASV_16s_26015 | 0.023334649 | -0.001779119 | 3.551925364 | 0.156564776 | 0.999989141 | NA |
| ASV_16s_26016 | 0.023334649 | -0.001779119 | 3.551925364 | 0.156564776 | 0.999989141 | NA |
| ASV_16s_26017 | 0.110732468 | -0.444031199 | 3.551343053 | 0.467528098 | 0.999556908 | NA |
| ASV_16s_26018 | 0.089054237 | -0.370862427 | 3.551541456 | 0.391073458 | 0.99975573  | NA |
| ASV_16s_26019 | 0.089054237 | -0.370862427 | 3.551541456 | 0.391073458 | 0.99975573  | NA |
| ASV_16s_26020 | 0.089054237 | -0.370862427 | 3.551541456 | 0.391073458 | 0.99975573  | NA |
| ASV_16s_26021 | 0.089054237 | -0.370862427 | 3.551541456 | 0.391073458 | 0.99975573  | NA |
| ASV_16s_26022 | 0.089054237 | -0.370862427 | 3.551541456 | 0.391073458 | 0.99975573  | NA |
| ASV_16s_26023 | 0.089054237 | -0.370862427 | 3.551541456 | 0.391073458 | 0.99975573  | NA |
| ASV_16s_26024 | 0.089054237 | -0.370862427 | 3.551541456 | 0.391073458 | 0.99975573  | NA |
| ASV_16s_26025 | 0.089054237 | -0.370862427 | 3.551541456 | 0.391073458 | 0.99975573  | NA |
| ASV_16s_26026 | 0.089054237 | -0.370862427 | 3.551541456 | 0.391073458 | 0.99975573  | NA |
| ASV_16s_26027 | 0.086736009 | -0.361930735 | 3.551559055 | 0.383494919 | 0.999771233 | NA |
| ASV_16s_26028 | 0.086272363 | -0.360129034 | 3.551562586 | 0.381995603 | 0.999774217 | NA |
| ASV_16s_26029 | 0.090273136 | -0.375480822 | 3.551529974 | 0.395085498 | 0.999747238 | NA |
| ASV_16s_26030 | 0.083954135 | -0.350904606 | 3.551580162 | 0.374587023 | 0.999788572 | NA |
| ASV_16s_26031 | 0.083954135 | -0.350904606 | 3.551580162 | 0.374587023 | 0.999788572 | NA |
| ASV_16s_26032 | 0.083954135 | -0.350904606 | 3.551580162 | 0.374587023 | 0.999788572 | NA |
| ASV_16s_26033 | 0.091840291 | -0.38129944  | 3.551515334 | 0.400301986 | 0.999735895 | NA |
| ASV_16s_26034 | 0.091840291 | -0.38129944  | 3.551515334 | 0.400301986 | 0.999735895 | NA |
| ASV_16s_26035 | 0.091840291 | -0.38129944  | 3.551515334 | 0.400301986 | 0.999735895 | NA |
| ASV_16s_26036 | 0.091840291 | -0.38129944  | 3.551515334 | 0.400301986 | 0.999735895 | NA |
| ASV_16s_26037 | 0.091840291 | -0.38129944  | 3.551515334 | 0.400301986 | 0.999735895 | NA |
| ASV_16s_26038 | 0.091840291 | -0.38129944  | 3.551515334 | 0.400301986 | 0.999735895 | NA |
| ASV_16s_26039 | 0.091840291 | -0.38129944  | 3.551515334 | 0.400301986 | 0.999735895 | NA |
| ASV_16s_26040 | 0.091840291 | -0.38129944  | 3.551515334 | 0.400301986 | 0.999735895 | NA |
| ASV_16s_26041 | 0.091840291 | -0.38129944  | 3.551515334 | 0.400301986 | 0.999735895 | NA |
| ASV_16s_26042 | 0.086100325 | -0.359453773 | 3.551563912 | 0.381435085 | 0.999775326 | NA |
| ASV_16s_26043 | 0.081635908 | -0.341229758 | 3.55159719  | 0.3673201   | 0.999802029 | NA |
| ASV_16s_26044 | 0.081635908 | -0.341229758 | 3.55159719  | 0.3673201   | 0.999802029 | NA |
| ASV_16s_26045 | 0.081635908 | -0.341229758 | 3.55159719  | 0.3673201   | 0.999802029 | NA |
| ASV_16s_26046 | 0.081635908 | -0.341229758 | 3.55159719  | 0.3673201   | 0.999802029 | NA |
| ASV_16s_26047 | 0.081635908 | -0.341229758 | 3.55159719  | 0.3673201   | 0.999802029 | NA |
| ASV_16s_26048 | 0.081635908 | -0.341229758 | 3.55159719  | 0.3673201   | 0.999802029 | NA |
| ASV_16s_26049 | 0.081635908 | -0.341229758 | 3.55159719  | 0.3673201   | 0.999802029 | NA |
| ASV_16s_26050 | 0.081635908 | -0.341229758 | 3.55159719  | 0.3673201   | 0.999802029 | NA |
| ASV_16s_26051 | 0.081635908 | -0.341229758 | 3.55159719  | 0.3673201   | 0.999802029 | NA |
| ASV_16s_26052 | 0.081635908 | -0.341229758 | 3.55159719  | 0.3673201   | 0.999802029 | NA |
| ASV_16s_26053 | 0.081635908 | -0.341229758 | 3.55159719  | 0.3673201   | 0.999802029 | NA |
| ASV_16s_26054 | 0.081635908 | -0.341229758 | 3.55159719  | 0.3673201   | 0.999802029 | NA |
| ASV_16s_26055 | 0.081635908 | -0.341229758 | 3.55159719  | 0.3673201   | 0.999802029 | NA |
| ASV_16s_26056 | 0.081635908 | -0.341229758 | 3.55159719  | 0.3673201   | 0.999802029 | NA |
| ASV_16s_26057 | 0.081635908 | -0.341229758 | 3.55159719  | 0.3673201   | 0.999802029 | NA |
| ASV_16s_26058 | 0.081635908 | -0.341229758 | 3.55159719  | 0.3673201   | 0.999802029 | NA |
| ASV_16s_26059 | 0.081635908 | -0.341229758 | 3.55159719  | 0.3673201   | 0.999802029 | NA |
| ASV_16s_26060 | 0.090082766 | -0.374768614 | 3.551531776 | 0.394457481 | 0.99974858  | NA |



|               |             |              |             |             |             |    |
|---------------|-------------|--------------|-------------|-------------|-------------|----|
| ASV_16s_26128 | 0.06536521  | -0.266995894 | 3.551724706 | 0.321706005 | 0.999873322 | NA |
| ASV_16s_26129 | 0.06536521  | -0.266995894 | 3.551724706 | 0.321706005 | 0.999873322 | NA |
| ASV_16s_26130 | 0.06536521  | -0.266995894 | 3.551724706 | 0.321706005 | 0.999873322 | NA |
| ASV_16s_26131 | 0.06536521  | -0.266995894 | 3.551724706 | 0.321706005 | 0.999873322 | NA |
| ASV_16s_26132 | 0.06536521  | -0.266995894 | 3.551724706 | 0.321706005 | 0.999873322 | NA |
| ASV_16s_26133 | 0.06536521  | -0.266995894 | 3.551724706 | 0.321706005 | 0.999873322 | NA |
| ASV_16s_26134 | 0.06536521  | -0.266995894 | 3.551724706 | 0.321706005 | 0.999873322 | NA |
| ASV_16s_26135 | 0.06536521  | -0.266995894 | 3.551724706 | 0.321706005 | 0.999873322 | NA |
| ASV_16s_26136 | 0.06536521  | -0.266995894 | 3.551724706 | 0.321706005 | 0.999873322 | NA |
| ASV_16s_26137 | 0.06536521  | -0.266995894 | 3.551724706 | 0.321706005 | 0.999873322 | NA |
| ASV_16s_26138 | 0.06536521  | -0.266995894 | 3.551724706 | 0.321706005 | 0.999873322 | NA |
| ASV_16s_26139 | 0.06536521  | -0.266995894 | 3.551724706 | 0.321706005 | 0.999873322 | NA |
| ASV_16s_26140 | 0.06536521  | -0.266995894 | 3.551724706 | 0.321706005 | 0.999873322 | NA |
| ASV_16s_26141 | 0.06536521  | -0.266995894 | 3.551724706 | 0.321706005 | 0.999873322 | NA |
| ASV_16s_26142 | 0.06536521  | -0.266995894 | 3.551724706 | 0.321706005 | 0.999873322 | NA |
| ASV_16s_26143 | 0.099560103 | -0.408280851 | 3.551445935 | 0.426849553 | 0.999672708 | NA |
| ASV_16s_26144 | 0.099560103 | -0.408280851 | 3.551445935 | 0.426849553 | 0.999672708 | NA |
| ASV_16s_26145 | 0.020825774 | -0.108377034 | 3.551430157 | 0.049366892 | 0.999999801 | NA |
| ASV_16s_26146 | 0.021604854 | 0.119957566  | 3.551468047 | 0.071899805 | 0.999999264 | NA |
| ASV_16s_26147 | 0.042310325 | 0.226027024  | 3.551206087 | 0.169273064 | 0.999985801 | NA |
| ASV_16s_26148 | 0.029031849 | 0.234417841  | 3.551402668 | 0.086596272 | 0.99998596  | NA |
| ASV_16s_26156 | 0.095309268 | -0.419175468 | 3.551563117 | 0.355080806 | 0.999873338 | NA |
| ASV_16s_26157 | 0.073626506 | 0.129852802  | 3.551831953 | 0.368201291 | 0.999800429 | NA |
| ASV_16s_26158 | 0.084842285 | -0.299655123 | 3.551700442 | 0.326513199 | 0.999866819 | NA |
| ASV_16s_26159 | 0.084049731 | -0.347389245 | 3.55174036  | 0.25278985  | 0.999944047 | NA |
| ASV_16s_26160 | 0.0666778   | -0.074136239 | 3.551809689 | 0.272641631 | 0.999927656 | NA |
| ASV_16s_26161 | 0.103105159 | 0.748585501  | 3.550887872 | 0.248856162 | 0.999946955 | NA |
| ASV_16s_26162 | 0.082166637 | 0.322244793  | 3.551949231 | 0.299322829 | 0.999900725 | NA |
| ASV_16s_26163 | 0.071120101 | 0.347459237  | 3.551948702 | 0.300558756 | 0.999899331 | NA |
| ASV_16s_26164 | 0.096691351 | -0.269702093 | 3.55175611  | 0.33078021  | 0.999860857 | NA |
| ASV_16s_26165 | 0.092285673 | -0.252260156 | 3.551773658 | 0.316862744 | 0.999879647 | NA |
| ASV_16s_26166 | 0.069570795 | 0.121525508  | 3.551946481 | 0.292157808 | 0.999908543 | NA |
| ASV_16s_26167 | 0.105225872 | -0.012156936 | 3.551749246 | 0.40980632  | 0.999714338 | NA |
| ASV_16s_26168 | 0.08903265  | -0.232474922 | 3.551774707 | 0.342082725 | 0.999844175 | NA |
| ASV_16s_26169 | 0.084969346 | -0.233203525 | 3.551773843 | 0.329813184 | 0.999862224 | NA |
| ASV_16s_26170 | 0.080273106 | -0.232283471 | 3.551774935 | 0.312226977 | 0.999885493 | NA |
| ASV_16s_26171 | 0.072878044 | 0.586105351  | 3.552002953 | 0.283360794 | 0.999917544 | NA |
| ASV_16s_26172 | 0.085084146 | -0.183328159 | 3.551785365 | 0.338277006 | 0.999849939 | NA |
| ASV_16s_26173 | 0.07138865  | 0.129057292  | 3.551884701 | 0.25169511  | 0.999944867 | NA |
| ASV_16s_26174 | 0.07234122  | 0.63268295   | 3.552005603 | 0.24198344  | 0.999951779 | NA |
| ASV_16s_26175 | 0.074145394 | 0.635007509  | 3.551951099 | 0.294270582 | 0.999906284 | NA |
| ASV_16s_26176 | 0.098060774 | -0.142934369 | 3.551743962 | 0.390054206 | 0.999757856 | NA |
| ASV_16s_26177 | 0.089000254 | -0.142933939 | 3.551743965 | 0.362286839 | 0.999810995 | NA |
| ASV_16s_26178 | 0.086586144 | -0.142934369 | 3.551743962 | 0.355091589 | 0.99982332  | NA |
| ASV_16s_26179 | 0.089777368 | -0.115161139 | 3.551903546 | 0.28318659  | 0.999917716 | NA |
| ASV_16s_26180 | 0.087547516 | -0.142934369 | 3.551743962 | 0.357361825 | 0.999819493 | NA |
| ASV_16s_26181 | 0.087547516 | -0.142934369 | 3.551743962 | 0.357361825 | 0.999819493 | NA |
| ASV_16s_26182 | 0.072325786 | 0.210841347  | 3.551772802 | 0.200209519 | 0.999974753 | NA |
| ASV_16s_26183 | 0.100952714 | 1.016494151  | 3.551853509 | 0.244812195 | 0.999949832 | NA |
| ASV_16s_26184 | 0.057443055 | 0.527541622  | 3.551937295 | 0.298542143 | 0.999901598 | NA |
| ASV_16s_26185 | 0.079942143 | -0.064675879 | 3.55192229  | 0.276893864 | 0.999923755 | NA |
| ASV_16s_26186 | 0.085541235 | -0.09636421  | 3.551689865 | 0.362333017 | 0.999810914 | NA |
| ASV_16s_26187 | 0.080289567 | -0.088991082 | 3.551775282 | 0.339595067 | 0.99984796  | NA |
| ASV_16s_26188 | 0.086804444 | -0.096189671 | 3.551691786 | 0.365850361 | 0.999804677 | NA |
| ASV_16s_26189 | 0.086934263 | -0.09636421  | 3.551689865 | 0.366442058 | 0.999803614 | NA |
| ASV_16s_26190 | 0.081682594 | -0.088991082 | 3.551775282 | 0.343704327 | 0.999841674 | NA |
| ASV_16s_26191 | 0.076232978 | -0.064675879 | 3.55192229  | 0.266375797 | 0.999933148 | NA |
| ASV_16s_26192 | 0.087778342 | -0.098777131 | 3.55168031  | 0.402739883 | 0.999730476 | NA |
| ASV_16s_26193 | 0.081702252 | -0.096189671 | 3.551691786 | 0.350776093 | 0.99983044  | NA |
| ASV_16s_26194 | 0.092918055 | 0.227771383  | 3.551653988 | 0.393399951 | 0.99975083  | NA |
| ASV_16s_26195 | 0.100589786 | 0.463805679  | 3.551854754 | 0.34901718  | 0.999833284 | NA |
| ASV_16s_26196 | 0.086577488 | -0.047602765 | 3.55163503  | 0.378344424 | 0.999781373 | NA |
| ASV_16s_26197 | 0.07295649  | 0.269894763  | 3.551748199 | 0.334945449 | 0.999854861 | NA |
| ASV_16s_26198 | 0.084323569 | 0.663929293  | 3.551701495 | 0.386426241 | 0.999765319 | NA |
| ASV_16s_26199 | 0.081718838 | 0.004117457  | 3.551594959 | 0.376100853 | 0.999785692 | NA |
| ASV_16s_26200 | 0.081881112 | 0.004047777  | 3.551592292 | 0.376859583 | 0.999784238 | NA |
| ASV_16s_26201 | 0.075917726 | 0.042108313  | 3.551800368 | 0.405525793 | 0.999724191 | NA |

|               |             |              |             |             |                |
|---------------|-------------|--------------|-------------|-------------|----------------|
| ASV_16s_26202 | 0.078805831 | -0.062651917 | 3.55163512  | 0.366975189 | 0.999802652 NA |
| ASV_16s_26203 | 0.088104431 | 0.543421359  | 3.551570394 | 0.196651234 | 0.999976257 NA |
| ASV_16s_26204 | 0.083736053 | 0.10448407   | 3.551501247 | 0.408150684 | 0.999718177 NA |
| ASV_16s_26205 | 0.084481248 | 0.104466691  | 3.551500659 | 0.409686734 | 0.999714616 NA |
| ASV_16s_26206 | 0.073123579 | 0.453599929  | 3.551621596 | 0.369057374 | 0.999798867 NA |
| ASV_16s_26207 | 0.097231122 | 0.96215153   | 3.551752597 | 0.22018405  | 0.999965054 NA |
| ASV_16s_26208 | 0.073106909 | -0.069208084 | 3.551498235 | 0.380343458 | 0.999777475 NA |
| ASV_16s_26209 | 0.080181653 | -0.228143043 | 3.551385079 | 0.357910651 | 0.999818559 NA |
| ASV_16s_26210 | 0.051483101 | 0.169389534  | 3.551958164 | 0.23902432  | 0.999953759 NA |
| ASV_16s_26211 | 0.071567441 | 0.059626815  | 3.551390295 | 0.192170773 | 0.999978059 NA |
| ASV_16s_26212 | 0.11006046  | 0.244806979  | 3.551673061 | 0.346844483 | 0.999836751 NA |
| ASV_16s_26213 | 0.083939595 | 0.258765673  | 3.551392435 | 0.46619281  | 0.999561096 NA |
| ASV_16s_26214 | 0.085748412 | 0.877155407  | 3.551775252 | 0.33839575  | 0.999849761 NA |
| ASV_16s_26215 | 0.085748412 | 0.877155407  | 3.551775252 | 0.33839575  | 0.999849761 NA |
| ASV_16s_26216 | 0.085748412 | 0.877155407  | 3.551775252 | 0.33839575  | 0.999849761 NA |
| ASV_16s_26217 | 0.085748412 | 0.877155407  | 3.551775252 | 0.33839575  | 0.999849761 NA |
| ASV_16s_26218 | 0.085748412 | 0.877155407  | 3.551775252 | 0.33839575  | 0.999849761 NA |
| ASV_16s_26219 | 0.085748412 | 0.877155407  | 3.551775252 | 0.33839575  | 0.999849761 NA |
| ASV_16s_26220 | 0.085748412 | 0.877155407  | 3.551775252 | 0.33839575  | 0.999849761 NA |
| ASV_16s_26221 | 0.089007177 | 0.407291011  | 3.551783717 | 0.224636046 | 0.999962582 NA |
| ASV_16s_26222 | 0.09403607  | 0.33796218   | 3.551883056 | 0.219082805 | 0.999956647 NA |
| ASV_16s_26223 | 0.095748695 | 0.295756487  | 3.55190336  | 0.209263276 | 0.99997063 NA  |
| ASV_16s_26224 | 0.052011058 | -0.198676964 | 3.551798328 | 0.292593721 | 0.99990808 NA  |
| ASV_16s_26225 | 0.090855113 | 0.942927956  | 3.551647647 | 0.352944988 | 0.999826887 NA |
| ASV_16s_26226 | 0.07236569  | 0.868081505  | 3.551803947 | 0.308988661 | 0.999889458 NA |
| ASV_16s_26227 | 0.07236569  | 0.868081505  | 3.551803947 | 0.308988661 | 0.999889458 NA |
| ASV_16s_26228 | 0.07236569  | 0.868081505  | 3.551803947 | 0.308988661 | 0.999889458 NA |
| ASV_16s_26229 | 0.081427716 | 0.905929364  | 3.551727849 | 0.329290588 | 0.999862959 NA |
| ASV_16s_26230 | 0.081427716 | 0.905929364  | 3.551727849 | 0.329290588 | 0.999862959 NA |
| ASV_16s_26231 | 0.081427716 | 0.905929364  | 3.551727849 | 0.329290588 | 0.999862959 NA |
| ASV_16s_26232 | 0.103918911 | 0.989852006  | 3.551544596 | 0.389375537 | 0.999759265 NA |
| ASV_16s_26233 | 0.074709826 | 0.87791413   | 3.551786865 | 0.313988127 | 0.999883296 NA |
| ASV_16s_26234 | 0.074709826 | 0.87791413   | 3.551786865 | 0.313988127 | 0.999883296 NA |
| ASV_16s_26235 | 0.1180525   | 1.034705253  | 3.551452162 | 0.432418077 | 0.999658253 NA |
| ASV_16s_26236 | 0.070830048 | 0.325115666  | 3.55203403  | 0.325188974 | 0.999868633 NA |
| ASV_16s_26237 | 0.070830048 | 0.325115666  | 3.55203403  | 0.325188974 | 0.999868633 NA |
| ASV_16s_26238 | 0.070830048 | 0.325115666  | 3.55203403  | 0.325188974 | 0.999868633 NA |
| ASV_16s_26239 | 0.070830048 | 0.325115666  | 3.55203403  | 0.325188974 | 0.999868633 NA |
| ASV_16s_26240 | 0.070830048 | 0.325115666  | 3.55203403  | 0.325188974 | 0.999868633 NA |
| ASV_16s_26241 | 0.070830048 | 0.325115666  | 3.55203403  | 0.325188974 | 0.999868633 NA |
| ASV_16s_26242 | 0.085748412 | 0.328198285  | 3.552005654 | 0.367535316 | 0.999801639 NA |
| ASV_16s_26243 | 0.085748412 | 0.328198285  | 3.552005654 | 0.367535316 | 0.999801639 NA |
| ASV_16s_26244 | 0.085748412 | 0.328198285  | 3.552005654 | 0.367535316 | 0.999801639 NA |
| ASV_16s_26245 | 0.094841421 | 0.331167232  | 3.551983059 | 0.396556549 | 0.999744074 NA |
| ASV_16s_26246 | 0.094841421 | 0.331167232  | 3.551983059 | 0.396556549 | 0.999744074 NA |
| ASV_16s_26247 | 0.094841421 | 0.331167232  | 3.551983059 | 0.396556549 | 0.999744074 NA |
| ASV_16s_26248 | 0.09283206  | 0.345055481  | 3.551914673 | 0.212127276 | 0.999969233 NA |
| ASV_16s_26249 | 0.12423497  | 0.341281508  | 3.551903049 | 0.502729328 | 0.999436426 NA |
| ASV_16s_26250 | 0.104242682 | -0.158974948 | 3.551866696 | 0.404566048 | 0.999726367 NA |
| ASV_16s_26251 | 0.054889057 | 0.325260582  | 3.552042645 | 0.289265516 | 0.999911574 NA |
| ASV_16s_26252 | 0.070926611 | 0.768824283  | 3.551892462 | 0.191251565 | 0.999978416 NA |
| ASV_16s_26253 | 0.074321007 | 0.325517692  | 3.552029166 | 0.334447168 | 0.999855588 NA |
| ASV_16s_26254 | 0.074321007 | 0.325517692  | 3.552029166 | 0.334447168 | 0.999855588 NA |
| ASV_16s_26255 | 0.074321007 | 0.325517692  | 3.552029166 | 0.334447168 | 0.999855588 NA |
| ASV_16s_26256 | 0.074321007 | 0.325517692  | 3.552029166 | 0.334447168 | 0.999855588 NA |
| ASV_16s_26257 | 0.074321007 | 0.325517692  | 3.552029166 | 0.334447168 | 0.999855588 NA |
| ASV_16s_26258 | 0.074321007 | 0.325517692  | 3.552029166 | 0.334447168 | 0.999855588 NA |
| ASV_16s_26259 | 0.0997636   | 0.332946919  | 3.551970289 | 0.413120745 | 0.999706545 NA |
| ASV_16s_26260 | 0.0997636   | 0.332946919  | 3.551970289 | 0.413120745 | 0.999706545 NA |
| ASV_16s_26261 | 0.095484869 | 0.331403323  | 3.551981346 | 0.39867411  | 0.999739472 NA |
| ASV_16s_26262 | 0.128868271 | 0.342800475  | 3.551888438 | 0.520800425 | 0.999366698 NA |
| ASV_16s_26263 | 0.118309056 | 0.56545127   | 3.55200563  | 0.356394321 | 0.999821131 NA |
| ASV_16s_26264 | 0.092321755 | 0.343517279  | 3.551938051 | 0.200703288 | 0.99997454 NA  |
| ASV_16s_26265 | 0.126589149 | 0.342059724  | 3.551895527 | 0.511870465 | 0.999401845 NA |
| ASV_16s_26266 | 0.095418245 | 0.663216852  | 3.551972311 | 0.2682135   | 0.999931568 NA |
| ASV_16s_26267 | 0.098469855 | 0.525035943  | 3.551705641 | 0.249162589 | 0.999946732 NA |
| ASV_16s_26268 | 0.091840291 | -0.359118997 | 3.55161946  | 0.39306282  | 0.999751544 NA |

|               |             |              |             |             |             |    |
|---------------|-------------|--------------|-------------|-------------|-------------|----|
| ASV_16s_26269 | 0.091840291 | -0.359118997 | 3.55161946  | 0.39306282  | 0.999751544 | NA |
| ASV_16s_26270 | 0.109688466 | -0.412339377 | 3.551464699 | 0.454756761 | 0.999595861 | NA |
| ASV_16s_26271 | 0.141304071 | -0.356299672 | 3.551738971 | 0.312599421 | 0.999885031 | NA |
| ASV_16s_26272 | 0.09152321  | 0.16095073   | 3.551533033 | 0.420338766 | 0.999689071 | NA |
| ASV_16s_26273 | 0.078912518 | -0.314385718 | 3.551726976 | 0.353022854 | 0.999826758 | NA |
| ASV_16s_26274 | 0.078912518 | -0.314385718 | 3.551726976 | 0.353022854 | 0.999826758 | NA |
| ASV_16s_26275 | 0.102127777 | -0.390975568 | 3.551527408 | 0.427789701 | 0.999670297 | NA |
| ASV_16s_26276 | 0.054818317 | -0.206815207 | 3.551873528 | 0.294209313 | 0.99990635  | NA |
| ASV_16s_26277 | 0.054818317 | -0.206815207 | 3.551873528 | 0.294209313 | 0.99990635  | NA |
| ASV_16s_26278 | 0.054818317 | -0.206815207 | 3.551873528 | 0.294209313 | 0.99990635  | NA |
| ASV_16s_26279 | 0.080642803 | -0.320807196 | 3.551713342 | 0.358100713 | 0.999818235 | NA |
| ASV_16s_26280 | 0.080642803 | -0.320807196 | 3.551713342 | 0.358100713 | 0.999818235 | NA |
| ASV_16s_26281 | 0.071753697 | -0.286322242 | 3.551780363 | 0.333102057 | 0.999857536 | NA |
| ASV_16s_26282 | 0.071753697 | -0.286322242 | 3.551780363 | 0.333102057 | 0.999857536 | NA |
| ASV_16s_26283 | 0.071753697 | -0.286322242 | 3.551780363 | 0.333102057 | 0.999857536 | NA |
| ASV_16s_26284 | 0.071753697 | -0.286322242 | 3.551780363 | 0.333102057 | 0.999857536 | NA |
| ASV_16s_26285 | 0.071753697 | -0.286322242 | 3.551780363 | 0.333102057 | 0.999857536 | NA |
| ASV_16s_26286 | 0.071753697 | -0.286322242 | 3.551780363 | 0.333102057 | 0.999857536 | NA |
| ASV_16s_26287 | 0.071753697 | -0.286322242 | 3.551780363 | 0.333102057 | 0.999857536 | NA |
| ASV_16s_26288 | 0.106508875 | 0.99847912   | 3.551526313 | 0.396998403 | 0.999743118 | NA |
| ASV_16s_26289 | 0.106508875 | 0.99847912   | 3.551526313 | 0.396998403 | 0.999743118 | NA |
| ASV_16s_26290 | 0.094954569 | 1.129811544  | 3.551683988 | 0.192138732 | 0.999918071 | NA |
| ASV_16s_26291 | 0.098866761 | 0.972382858  | 3.551582111 | 0.374850793 | 0.999788072 | NA |
| ASV_16s_26292 | 0.098866761 | 0.972382858  | 3.551582111 | 0.374850793 | 0.999788072 | NA |
| ASV_16s_26293 | 0.095568324 | 1.041428879  | 3.551638744 | 0.26782756  | 0.999931902 | NA |
| ASV_16s_26294 | 0.108156727 | 1.003871695  | 3.551515027 | 0.401916308 | 0.999732315 | NA |
| ASV_16s_26295 | 0.081275098 | 0.955763383  | 3.551489135 | 0.273658315 | 0.999926736 | NA |
| ASV_16s_26296 | 0.081275098 | 0.955763383  | 3.551489135 | 0.273658315 | 0.999926736 | NA |
| ASV_16s_26297 | 0.081275098 | 0.955763383  | 3.551489135 | 0.273658315 | 0.999926736 | NA |
| ASV_16s_26298 | 0.081275098 | 0.955763383  | 3.551489135 | 0.273658315 | 0.999926736 | NA |
| ASV_16s_26299 | 0.081275098 | 0.955763383  | 3.551489135 | 0.273658315 | 0.999926736 | NA |
| ASV_16s_26300 | 0.081275098 | 0.955763383  | 3.551489135 | 0.273658315 | 0.999926736 | NA |
| ASV_16s_26301 | 0.060383123 | 0.86858041   | 3.551674161 | 0.204316808 | 0.999972937 | NA |
| ASV_16s_26302 | 0.042417772 | 0.776560613  | 3.55181231  | 0.169981351 | 0.999985596 | NA |
| ASV_16s_26303 | 0.042417772 | 0.776560613  | 3.55181231  | 0.169981351 | 0.999985596 | NA |
| ASV_16s_26304 | 0.05256901  | 0.830964343  | 3.551750641 | 0.207404187 | 0.999971512 | NA |
| ASV_16s_26305 | 0.072719003 | 0.921960343  | 3.551566345 | 0.255363705 | 0.999942085 | NA |
| ASV_16s_26306 | 0.072719003 | 0.921960343  | 3.551566345 | 0.255363705 | 0.999942085 | NA |
| ASV_16s_26307 | 0.072719003 | 0.921960343  | 3.551566345 | 0.255363705 | 0.999942085 | NA |
| ASV_16s_26308 | 0.072719003 | 0.921960343  | 3.551566345 | 0.255363705 | 0.999942085 | NA |
| ASV_16s_26309 | 0.072719003 | 0.921960343  | 3.551566345 | 0.255363705 | 0.999942085 | NA |
| ASV_16s_26310 | 0.100226364 | 1.022109952  | 3.551330989 | 0.321968778 | 0.999872972 | NA |
| ASV_16s_26311 | 0.100226364 | 1.022109952  | 3.551330989 | 0.321968778 | 0.999872972 | NA |
| ASV_16s_26312 | 0.085300251 | 0.344357894  | 3.551741734 | 0.306972949 | 0.999891877 | NA |
| ASV_16s_26313 | 0.091918714 | 0.345520436  | 3.551719956 | 0.327164781 | 0.999865921 | NA |
| ASV_16s_26314 | 0.091918714 | 0.345520436  | 3.551719956 | 0.327164781 | 0.999865921 | NA |
| ASV_16s_26315 | 0.07720809  | 0.343156427  | 3.55176954  | 0.284098316 | 0.999916814 | NA |
| ASV_16s_26316 | 0.083384493 | 0.344006775  | 3.551748471 | 0.301384434 | 0.999898392 | NA |
| ASV_16s_26317 | 0.083384493 | 0.344006775  | 3.551748471 | 0.301384434 | 0.999898392 | NA |
| ASV_16s_26318 | 0.083384493 | 0.344006775  | 3.551748471 | 0.301384434 | 0.999898392 | NA |
| ASV_16s_26319 | 0.083384493 | 0.344006775  | 3.551748471 | 0.301384434 | 0.999898392 | NA |
| ASV_16s_26320 | 0.075709702 | 0.343071398  | 3.551773997 | 0.28020776  | 0.999920614 | NA |
| ASV_16s_26321 | 0.075709702 | 0.343071398  | 3.551773997 | 0.28020776  | 0.999920614 | NA |
| ASV_16s_26322 | 0.075709702 | 0.343071398  | 3.551773997 | 0.28020776  | 0.999920614 | NA |
| ASV_16s_26323 | 0.075709702 | 0.343071398  | 3.551773997 | 0.28020776  | 0.999920614 | NA |
| ASV_16s_26324 | 0.062497466 | 0.342268365  | 3.551818099 | 0.249287535 | 0.999946641 | NA |
| ASV_16s_26325 | 0.062497466 | 0.342268365  | 3.551818099 | 0.249287535 | 0.999946641 | NA |
| ASV_16s_26326 | 0.062497466 | 0.342268365  | 3.551818099 | 0.249287535 | 0.999946641 | NA |
| ASV_16s_26327 | 0.107061016 | 0.34920554   | 3.551668188 | 0.377659234 | 0.999782698 | NA |
| ASV_16s_26328 | 0.107061016 | 0.34920554   | 3.551668188 | 0.377659234 | 0.999782698 | NA |
| ASV_16s_26329 | 0.067620042 | 0.342592131  | 3.551799873 | 0.260316994 | 0.999938176 | NA |
| ASV_16s_26330 | 0.067620042 | 0.342592131  | 3.551799873 | 0.260316994 | 0.999938176 | NA |
| ASV_16s_26331 | 0.023544722 | 0.333854424  | 3.551971642 | 0.109825954 | 0.999996803 | NA |
| ASV_16s_26332 | 0.023544722 | 0.333854424  | 3.551971642 | 0.109825954 | 0.999996803 | NA |
| ASV_16s_26333 | 0.023544722 | 0.333854424  | 3.551971642 | 0.109825954 | 0.999996803 | NA |
| ASV_16s_26334 | 0.094861645 | 0.346025372  | 3.551710745 | 0.336553924 | 0.999852499 | NA |
| ASV_16s_26335 | 0.094861645 | 0.346025372  | 3.551710745 | 0.336553924 | 0.999852499 | NA |

|               |             |              |             |             |             |    |
|---------------|-------------|--------------|-------------|-------------|-------------|----|
| ASV_16s_26336 | 0.094861645 | 0.346025372  | 3.551710745 | 0.336553924 | 0.999852499 | NA |
| ASV_16s_26337 | 0.03799176  | -0.14306826  | 3.551698901 | 0.174135979 | 0.99998435  | NA |
| ASV_16s_26338 | 0.03799176  | -0.14306826  | 3.551698901 | 0.174135979 | 0.99998435  | NA |
| ASV_16s_26339 | 0.03799176  | -0.14306826  | 3.551698901 | 0.174135979 | 0.99998435  | NA |
| ASV_16s_26340 | 0.093197017 | -0.389478987 | 3.55130269  | 0.333732093 | 0.999856626 | NA |
| ASV_16s_26341 | 0.093197017 | -0.389478987 | 3.55130269  | 0.333732093 | 0.999856626 | NA |
| ASV_16s_26342 | 0.093197017 | -0.389478987 | 3.55130269  | 0.333732093 | 0.999856626 | NA |
| ASV_16s_26343 | 0.093197017 | -0.389478987 | 3.55130269  | 0.333732093 | 0.999856626 | NA |
| ASV_16s_26344 | 0.093197017 | -0.389478987 | 3.55130269  | 0.333732093 | 0.999856626 | NA |
| ASV_16s_26345 | 0.093197017 | -0.389478987 | 3.55130269  | 0.333732093 | 0.999856626 | NA |
| ASV_16s_26346 | 0.093197017 | -0.389478987 | 3.55130269  | 0.333732093 | 0.999856626 | NA |
| ASV_16s_26347 | 0.093197017 | -0.389478987 | 3.55130269  | 0.333732093 | 0.999856626 | NA |
| ASV_16s_26348 | 0.093197017 | -0.389478987 | 3.55130269  | 0.333732093 | 0.999856626 | NA |
| ASV_16s_26349 | 0.076235241 | -0.246854483 | 3.55133808  | 0.124055942 | 0.99999513  | NA |
| ASV_16s_26350 | 0.12021843  | -0.45558813  | 3.551076103 | 0.428358833 | 0.999668832 | NA |
| ASV_16s_26351 | 0.12021843  | -0.45558813  | 3.551076103 | 0.428358833 | 0.999668832 | NA |
| ASV_16s_26352 | 0.118498149 | -0.101539742 | 3.551138729 | 0.506175318 | 0.999423554 | NA |
| ASV_16s_26353 | 0.124084047 | -0.463675203 | 3.551038856 | 0.443038685 | 0.999629482 | NA |
| ASV_16s_26354 | 0.124084047 | -0.463675203 | 3.551038856 | 0.443038685 | 0.999629482 | NA |
| ASV_16s_26355 | 0.114788435 | -0.44386916  | 3.55112741  | 0.408179509 | 0.99971811  | NA |
| ASV_16s_26356 | 0.046140121 | -0.191234191 | 3.55164253  | 0.207623395 | 0.999971409 | NA |
| ASV_16s_26357 | 0.046140121 | -0.191234191 | 3.55164253  | 0.207623395 | 0.999971409 | NA |
| ASV_16s_26358 | 0.042286428 | -0.169337606 | 3.551667642 | 0.192037598 | 0.999978111 | NA |
| ASV_16s_26359 | 0.042286428 | -0.169337606 | 3.551667642 | 0.192037598 | 0.999978111 | NA |
| ASV_16s_26360 | 0.095078782 | 1.004905022  | 3.551375576 | 0.307954424 | 0.999890704 | NA |
| ASV_16s_26361 | 0.083400264 | 0.963679481  | 3.551471775 | 0.278591576 | 0.999922157 | NA |
| ASV_16s_26362 | 0.083400264 | 0.963679481  | 3.551471775 | 0.278591576 | 0.999922157 | NA |
| ASV_16s_26363 | 0.083400264 | 0.963679481  | 3.551471775 | 0.278591576 | 0.999922157 | NA |
| ASV_16s_26364 | 0.083400264 | 0.963679481  | 3.551471775 | 0.278591576 | 0.999922157 | NA |
| ASV_16s_26365 | 0.083400264 | 0.963679481  | 3.551471775 | 0.278591576 | 0.999922157 | NA |
| ASV_16s_26366 | 0.082939494 | 0.961978144  | 3.551475484 | 0.277509822 | 0.999923178 | NA |
| ASV_16s_26367 | 0.082939494 | 0.961978144  | 3.551475484 | 0.277509822 | 0.999923178 | NA |
| ASV_16s_26368 | 0.075709702 | -0.077218551 | 3.551234003 | 0.473613441 | 0.999537477 | NA |
| ASV_16s_26369 | 0.075709702 | -0.077218551 | 3.551234003 | 0.473613441 | 0.999537477 | NA |
| ASV_16s_26370 | 0.075709702 | -0.077218551 | 3.551234003 | 0.473613441 | 0.999537477 | NA |
| ASV_16s_26371 | 0.075709702 | -0.077218551 | 3.551234003 | 0.473613441 | 0.999537477 | NA |
| ASV_16s_26372 | 0.075709702 | -0.077218551 | 3.551234003 | 0.473613441 | 0.999537477 | NA |
| ASV_16s_26373 | 0.075709702 | -0.077218551 | 3.551234003 | 0.473613441 | 0.999537477 | NA |
| ASV_16s_26374 | 0.075709702 | -0.077218551 | 3.551234003 | 0.473613441 | 0.999537477 | NA |
| ASV_16s_26375 | 0.075709702 | -0.077218551 | 3.551234003 | 0.473613441 | 0.999537477 | NA |
| ASV_16s_26376 | 0.075709702 | -0.077218551 | 3.551234003 | 0.473613441 | 0.999537477 | NA |
| ASV_16s_26377 | 0.075709702 | -0.077218551 | 3.551234003 | 0.473613441 | 0.999537477 | NA |
| ASV_16s_26378 | 0.075709702 | -0.077218551 | 3.551234003 | 0.473613441 | 0.999537477 | NA |
| ASV_16s_26379 | 0.075709702 | -0.077218551 | 3.551234003 | 0.473613441 | 0.999537477 | NA |
| ASV_16s_26380 | 0.075709702 | -0.077218551 | 3.551234003 | 0.473613441 | 0.999537477 | NA |
| ASV_16s_26381 | 0.075709702 | -0.077218551 | 3.551234003 | 0.473613441 | 0.999537477 | NA |
| ASV_16s_26382 | 0.075709702 | -0.077218551 | 3.551234003 | 0.473613441 | 0.999537477 | NA |
| ASV_16s_26383 | 0.075709702 | -0.077218551 | 3.551234003 | 0.473613441 | 0.999537477 | NA |
| ASV_16s_26384 | 0.075709702 | -0.077218551 | 3.551234003 | 0.473613441 | 0.999537477 | NA |
| ASV_16s_26385 | 0.075709702 | -0.077218551 | 3.551234003 | 0.473613441 | 0.999537477 | NA |
| ASV_16s_26386 | 0.075709702 | -0.077218551 | 3.551234003 | 0.473613441 | 0.999537477 | NA |
| ASV_16s_26387 | 0.075709702 | -0.077218551 | 3.551234003 | 0.473613441 | 0.999537477 | NA |
| ASV_16s_26388 | 0.075709702 | -0.077218551 | 3.551234003 | 0.473613441 | 0.999537477 | NA |
| ASV_16s_26389 | 0.064558524 | -0.076809351 | 3.551356648 | 0.428002594 | 0.99966975  | NA |
| ASV_16s_26390 | 0.064558524 | -0.076809351 | 3.551356648 | 0.428002594 | 0.99966975  | NA |
| ASV_16s_26391 | 0.064558524 | -0.076809351 | 3.551356648 | 0.428002594 | 0.99966975  | NA |
| ASV_16s_26392 | 0.064558524 | -0.076809351 | 3.551356648 | 0.428002594 | 0.99966975  | NA |
| ASV_16s_26393 | 0.064558524 | -0.076809351 | 3.551356648 | 0.428002594 | 0.99966975  | NA |
| ASV_16s_26394 | 0.064558524 | -0.076809351 | 3.551356648 | 0.428002594 | 0.99966975  | NA |
| ASV_16s_26395 | 0.064558524 | -0.076809351 | 3.551356648 | 0.428002594 | 0.99966975  | NA |
| ASV_16s_26396 | 0.064558524 | -0.076809351 | 3.551356648 | 0.428002594 | 0.99966975  | NA |
| ASV_16s_26397 | 0.064558524 | -0.076809351 | 3.551356648 | 0.428002594 | 0.99966975  | NA |
| ASV_16s_26398 | 0.064558524 | -0.076809351 | 3.551356648 | 0.428002594 | 0.99966975  | NA |
| ASV_16s_26399 | 0.064558524 | -0.076809351 | 3.551356648 | 0.428002594 | 0.99966975  | NA |
| ASV_16s_26400 | 0.064558524 | -0.076809351 | 3.551356648 | 0.428002594 | 0.99966975  | NA |
| ASV_16s_26401 | 0.064558524 | -0.076809351 | 3.551356648 | 0.428002594 | 0.99966975  | NA |
| ASV_16s_26402 | 0.064558524 | -0.076809351 | 3.551356648 | 0.428002594 | 0.99966975  | NA |

|               |             |              |             |             |                |
|---------------|-------------|--------------|-------------|-------------|----------------|
| ASV_16s_26403 | 0.064558524 | -0.076809351 | 3.551356648 | 0.428002594 | 0.99966975 NA  |
| ASV_16s_26404 | 0.064558524 | -0.076809351 | 3.551356648 | 0.428002594 | 0.99966975 NA  |
| ASV_16s_26405 | 0.064558524 | -0.076809351 | 3.551356648 | 0.428002594 | 0.99966975 NA  |
| ASV_16s_26406 | 0.064558524 | -0.076809351 | 3.551356648 | 0.428002594 | 0.99966975 NA  |
| ASV_16s_26407 | 0.064558524 | -0.076809351 | 3.551356648 | 0.428002594 | 0.99966975 NA  |
| ASV_16s_26408 | 0.064558524 | -0.076809351 | 3.551356648 | 0.428002594 | 0.99966975 NA  |
| ASV_16s_26409 | 0.064558524 | -0.076809351 | 3.551356648 | 0.428002594 | 0.99966975 NA  |
| ASV_16s_26410 | 0.064558524 | -0.076809351 | 3.551356648 | 0.428002594 | 0.99966975 NA  |
| ASV_16s_26411 | 0.064558524 | -0.076809351 | 3.551356648 | 0.428002594 | 0.99966975 NA  |
| ASV_16s_26412 | 0.064558524 | -0.076809351 | 3.551356648 | 0.428002594 | 0.99966975 NA  |
| ASV_16s_26413 | 0.064558524 | -0.076809351 | 3.551356648 | 0.428002594 | 0.99966975 NA  |
| ASV_16s_26414 | 0.068477109 | 0.14185559   | 3.551323406 | 0.547162859 | 0.999254812 NA |
| ASV_16s_26415 | 0.043724147 | 0.225294775  | 3.551191863 | 0.177790694 | 0.999983194 NA |
| ASV_16s_26416 | 0.048061589 | 0.223186114  | 3.551153166 | 0.203451791 | 0.999973327 NA |
| ASV_16s_26417 | 0.048061589 | 0.223186114  | 3.551153166 | 0.203451791 | 0.999973327 NA |
| ASV_16s_26418 | 0.048061589 | 0.223186114  | 3.551153166 | 0.203451791 | 0.999973327 NA |
| ASV_16s_26419 | 0.047965614 | 0.223230675  | 3.55115395  | 0.202891381 | 0.999973577 NA |
| ASV_16s_26420 | 0.047965614 | 0.223230675  | 3.55115395  | 0.202891381 | 0.999973577 NA |
| ASV_16s_26421 | 0.047965614 | 0.223230675  | 3.55115395  | 0.202891381 | 0.999973577 NA |
| ASV_16s_26422 | 0.047965614 | 0.223230675  | 3.55115395  | 0.202891381 | 0.999973577 NA |
| ASV_16s_26423 | 0.077274941 | 0.310975649  | 3.551430679 | 0.464651945 | 0.999565895 NA |
| ASV_16s_26424 | 0.082028234 | 0.310972558  | 3.55138244  | 0.48484785  | 0.999500093 NA |
| ASV_16s_26425 | 0.082028234 | 0.310972558  | 3.55138244  | 0.48484785  | 0.999500093 NA |
| ASV_16s_26426 | 0.082028234 | 0.310972558  | 3.55138244  | 0.48484785  | 0.999500093 NA |
| ASV_16s_26427 | 0.082028234 | 0.310972558  | 3.55138244  | 0.48484785  | 0.999500093 NA |
| ASV_16s_26428 | 0.082028234 | 0.310972558  | 3.55138244  | 0.48484785  | 0.999500093 NA |
| ASV_16s_26429 | 0.082028234 | 0.310972558  | 3.55138244  | 0.48484785  | 0.999500093 NA |
| ASV_16s_26430 | 0.082028234 | 0.310972558  | 3.55138244  | 0.48484785  | 0.999500093 NA |
| ASV_16s_26431 | 0.082028234 | 0.310972558  | 3.55138244  | 0.48484785  | 0.999500093 NA |
| ASV_16s_26432 | 0.082634017 | 0.310972189  | 3.551376686 | 0.487458053 | 0.999491121 NA |
| ASV_16s_26433 | 0.082720558 | 0.310972137  | 3.551375871 | 0.487831616 | 0.999489828 NA |
| ASV_16s_26434 | 0.078349104 | 0.31097492   | 3.551419291 | 0.469154433 | 0.999551771 NA |
| ASV_16s_26435 | 0.083412882 | 0.310971722  | 3.551369409 | 0.490826142 | 0.999479384 NA |
| ASV_16s_26436 | 0.083412882 | 0.310971722  | 3.551369409 | 0.490826142 | 0.999479384 NA |
| ASV_16s_26437 | 0.083412882 | 0.310971722  | 3.551369409 | 0.490826142 | 0.999479384 NA |
| ASV_16s_26438 | 0.083412882 | 0.310971722  | 3.551369409 | 0.490826142 | 0.999479384 NA |
| ASV_16s_26439 | 0.083412882 | 0.310971722  | 3.551369409 | 0.490826142 | 0.999479384 NA |
| ASV_16s_26440 | 0.083412882 | 0.310971722  | 3.551369409 | 0.490826142 | 0.999479384 NA |
| ASV_16s_26441 | 0.071524898 | 0.310979923  | 3.551497481 | 0.440973226 | 0.999635202 NA |
| ASV_16s_26442 | 0.071524898 | 0.310979923  | 3.551497481 | 0.440973226 | 0.999635202 NA |
| ASV_16s_26443 | 0.081768596 | 0.310972718  | 3.551384932 | 0.483731445 | 0.999503897 NA |
| ASV_16s_26444 | 0.081768596 | 0.310972718  | 3.551384932 | 0.483731445 | 0.999503897 NA |
| ASV_16s_26445 | 0.081768596 | 0.310972718  | 3.551384932 | 0.483731445 | 0.999503897 NA |
| ASV_16s_26446 | 0.081768596 | 0.310972718  | 3.551384932 | 0.483731445 | 0.999503897 NA |
| ASV_16s_26447 | 0.050629091 | 0.595081063  | 3.551091148 | 0.179957341 | 0.999982481 NA |
| ASV_16s_26448 | 0.050629091 | 0.595081063  | 3.551091148 | 0.179957341 | 0.999982481 NA |
| ASV_16s_26449 | 0.050629091 | 0.595081063  | 3.551091148 | 0.179957341 | 0.999982481 NA |
| ASV_16s_26450 | 0.050629091 | 0.595081063  | 3.551091148 | 0.179957341 | 0.999982481 NA |
| ASV_16s_26451 | 0.050629091 | 0.595081063  | 3.551091148 | 0.179957341 | 0.999982481 NA |
| ASV_16s_26452 | 0.050629091 | 0.595081063  | 3.551091148 | 0.179957341 | 0.999982481 NA |
| ASV_16s_26453 | 0.050629091 | 0.595081063  | 3.551091148 | 0.179957341 | 0.999982481 NA |
| ASV_16s_26454 | 0.073365769 | 0.686068781  | 3.551453753 | 0.41193434  | 0.999709351 NA |
| ASV_16s_26455 | 0.085551542 | 0.686470707  | 3.551327203 | 0.454519775 | 0.999596561 NA |
| ASV_16s_26456 | 0.085551542 | 0.686470707  | 3.551327203 | 0.454519775 | 0.999596561 NA |
| ASV_16s_26457 | 0.105377243 | 0.489000124  | 3.551768363 | 0.291210842 | 0.999909544 NA |
| ASV_16s_26458 | 0.087056937 | 0.021233821  | 3.551900188 | 0.304091021 | 0.999895272 NA |
| ASV_16s_26459 | 0.08706074  | 0.350732319  | 3.551816262 | 0.256685768 | 0.999941059 NA |
| ASV_16s_26460 | 0.097164575 | 1.03377076   | 3.551752234 | 0.193405341 | 0.999977572 NA |
| ASV_16s_26461 | 0.05286601  | 0.089364676  | 3.551889788 | 0.283857367 | 0.999917053 NA |
| ASV_16s_26462 | 0.09012557  | 0.992369352  | 3.551784779 | 0.280236798 | 0.999920587 NA |
| ASV_16s_26463 | 0.102604062 | 0.814023853  | 3.551822623 | 0.402177357 | 0.999731733 NA |
| ASV_16s_26464 | 0.068522671 | -0.011012169 | 3.551759669 | 0.415139599 | 0.999701727 NA |
| ASV_16s_26465 | 0.069513708 | 0.046114568  | 3.551803296 | 0.420526303 | 0.999688607 NA |
| ASV_16s_26466 | 0.072618959 | 0.046114568  | 3.551803296 | 0.431938438 | 0.999659515 NA |
| ASV_16s_26467 | 0.061186278 | -0.256772562 | 3.551660036 | 0.303062215 | 0.999896465 NA |
| ASV_16s_26468 | 0.085727522 | 0.323280967  | 3.551991037 | 0.243268063 | 0.999950902 NA |
| ASV_16s_26469 | 0.098866761 | 0.298844449  | 3.551931169 | 0.409750222 | 0.999714468 NA |



|               |             |              |             |             |             |    |
|---------------|-------------|--------------|-------------|-------------|-------------|----|
| ASV_16s_26470 | 0.119610567 | 0.975821378  | 3.551567026 | 0.433903959 | 0.999654323 | NA |
| ASV_16s_26471 | 0.119610567 | 0.975821378  | 3.551567026 | 0.433903959 | 0.999654323 | NA |
| ASV_16s_26472 | 0.083897403 | 0.870924628  | 3.551784418 | 0.333883799 | 0.999856406 | NA |
| ASV_16s_26473 | 0.107061016 | 0.942536246  | 3.551655075 | 0.395970633 | 0.999745337 | NA |
| ASV_16s_26474 | 0.107061016 | 0.942536246  | 3.551655075 | 0.395970633 | 0.999745337 | NA |
| ASV_16s_26475 | 0.120495687 | 0.875906954  | 3.551576531 | 0.420313949 | 0.999689132 | NA |
| ASV_16s_26476 | 0.098553256 | 0.83481454   | 3.551654995 | 0.357259593 | 0.999819667 | NA |
| ASV_16s_26477 | 0.082762576 | 0.81560383   | 3.551681043 | 0.315958455 | 0.999880803 | NA |
| ASV_16s_26478 | 0.104838501 | 0.846354859  | 3.551633994 | 0.37451348  | 0.999788711 | NA |
| ASV_16s_26479 | 0.080824704 | 0.81036155   | 3.551688335 | 0.311507728 | 0.999886382 | NA |
| ASV_16s_26480 | 0.080824704 | 0.81036155   | 3.551688335 | 0.311507728 | 0.999886382 | NA |
| ASV_16s_26481 | 0.12835128  | 0.282131732  | 3.551680387 | 0.526804514 | 0.999342295 | NA |
| ASV_16s_26482 | 0.12835128  | 0.282131732  | 3.551680387 | 0.526804514 | 0.999342295 | NA |
| ASV_16s_26483 | 0.12835128  | 0.282131732  | 3.551680387 | 0.526804514 | 0.999342295 | NA |
| ASV_16s_26484 | 0.12835128  | 0.282131732  | 3.551680387 | 0.526804514 | 0.999342295 | NA |
| ASV_16s_26485 | 0.039244809 | 0.297166892  | 3.55193429  | 0.223518395 | 0.999963214 | NA |
| ASV_16s_26486 | 0.032320342 | 0.298593381  | 3.55194945  | 0.190101062 | 0.999978858 | NA |
| ASV_16s_26487 | 0.032320342 | 0.298593381  | 3.55194945  | 0.190101062 | 0.999978858 | NA |
| ASV_16s_26488 | 0.045320839 | 0.29518663   | 3.551917782 | 0.251470761 | 0.999945034 | NA |
| ASV_16s_26489 | 0.055005081 | -0.193606145 | 3.551746124 | 0.289793511 | 0.999911026 | NA |
| ASV_16s_26490 | 0.055005081 | -0.193606145 | 3.551746124 | 0.289793511 | 0.999911026 | NA |
| ASV_16s_26491 | 0.166403972 | 0.99055776   | 3.551298694 | 0.575815717 | 0.999118815 | NA |
| ASV_16s_26492 | 0.147459766 | -0.494929216 | 3.551152969 | 0.603362678 | 0.998973158 | NA |
| ASV_16s_26493 | 0.147459766 | -0.494929216 | 3.551152969 | 0.603362678 | 0.998973158 | NA |
| ASV_16s_26494 | 0.147459766 | -0.494929216 | 3.551152969 | 0.603362678 | 0.998973158 | NA |
| ASV_16s_26495 | 0.130526767 | 0.360918473  | 3.551562114 | 0.464437677 | 0.999566559 | NA |
| ASV_16s_26496 | 0.105360148 | 0.322081192  | 3.551841861 | 0.335131253 | 0.99985459  | NA |
| ASV_16s_26497 | 0.095078782 | 1.004905022  | 3.551375576 | 0.307954424 | 0.999890704 | NA |
| ASV_16s_26498 | 0.095078782 | 1.004905022  | 3.551375576 | 0.307954424 | 0.999890704 | NA |
| ASV_16s_26499 | 0.095078782 | 1.004905022  | 3.551375576 | 0.307954424 | 0.999890704 | NA |
| ASV_16s_26500 | 0.095078782 | 1.004905022  | 3.551375576 | 0.307954424 | 0.999890704 | NA |
| ASV_16s_26501 | 0.095078782 | 1.004905022  | 3.551375576 | 0.307954424 | 0.999890704 | NA |
| ASV_16s_26502 | 0.095078782 | 1.004905022  | 3.551375576 | 0.307954424 | 0.999890704 | NA |
| ASV_16s_26503 | 0.095078782 | 1.004905022  | 3.551375576 | 0.307954424 | 0.999890704 | NA |
| ASV_16s_26504 | 0.095078782 | 1.004905022  | 3.551375576 | 0.307954424 | 0.999890704 | NA |
| ASV_16s_26505 | 0.095078782 | 1.004905022  | 3.551375576 | 0.307954424 | 0.999890704 | NA |
| ASV_16s_26506 | 0.095078782 | 1.004905022  | 3.551375576 | 0.307954424 | 0.999890704 | NA |
| ASV_16s_26507 | 0.095078782 | 1.004905022  | 3.551375576 | 0.307954424 | 0.999890704 | NA |
| ASV_16s_26508 | 0.095078782 | 1.004905022  | 3.551375576 | 0.307954424 | 0.999890704 | NA |
| ASV_16s_26509 | 0.095078782 | 1.004905022  | 3.551375576 | 0.307954424 | 0.999890704 | NA |
| ASV_16s_26510 | 0.095078782 | 1.004905022  | 3.551375576 | 0.307954424 | 0.999890704 | NA |
| ASV_16s_26511 | 0.095078782 | 1.004905022  | 3.551375576 | 0.307954424 | 0.999890704 | NA |
| ASV_16s_26512 | 0.082973107 | 0.622574316  | 3.551771282 | 0.338177626 | 0.999850087 | NA |
| ASV_16s_26513 | 0.054178989 | -0.068583067 | 3.551479443 | 0.389251577 | 0.999759521 | NA |
| ASV_16s_26514 | 0.054178989 | -0.068583067 | 3.551479443 | 0.389251577 | 0.999759521 | NA |
| ASV_16s_26515 | 0.054178989 | -0.068583067 | 3.551479443 | 0.389251577 | 0.999759521 | NA |
| ASV_16s_26516 | 0.054178989 | -0.068583067 | 3.551479443 | 0.389251577 | 0.999759521 | NA |
| ASV_16s_26517 | 0.054178989 | -0.068583067 | 3.551479443 | 0.389251577 | 0.999759521 | NA |
| ASV_16s_26518 | 0.054178989 | -0.068583067 | 3.551479443 | 0.389251577 | 0.999759521 | NA |
| ASV_16s_26519 | 0.054178989 | -0.068583067 | 3.551479443 | 0.389251577 | 0.999759521 | NA |
| ASV_16s_26520 | 0.168532667 | -0.028538134 | 3.551001825 | 0.987782435 | 0.995023222 | NA |
| ASV_16s_26521 | 0.149928052 | -0.028359687 | 3.551061211 | 0.890651674 | 0.996405057 | NA |
| ASV_16s_26522 | 0.149928052 | -0.028359687 | 3.551061211 | 0.890651674 | 0.996405057 | NA |
| ASV_16s_26523 | 0.149928052 | -0.028359687 | 3.551061211 | 0.890651674 | 0.996405057 | NA |
| ASV_16s_26524 | 0.149928052 | -0.028359687 | 3.551061211 | 0.890651674 | 0.996405057 | NA |
| ASV_16s_26525 | 0.121930504 | 0.285637186  | 3.551204    | 0.919381936 | 0.996026345 | NA |
| ASV_16s_26526 | 0.12337016  | 0.340592902  | 3.551211406 | 0.914603261 | 0.996091047 | NA |
| ASV_16s_26527 | 0.126249472 | 0.453812468  | 3.551239094 | 0.879005021 | 0.996551623 | NA |
| ASV_16s_26528 | 0.109487149 | 0.483762579  | 3.551352083 | 0.759259293 | 0.997837839 | NA |
| ASV_16s_26529 | 0.149928052 | -0.028359687 | 3.551061211 | 0.890651674 | 0.996405057 | NA |
| ASV_16s_26530 | 0.119592102 | -0.027681933 | 3.551196752 | 0.736817392 | 0.99803658  | NA |
| ASV_16s_26531 | 0.119592102 | -0.027681933 | 3.551196752 | 0.736817392 | 0.99803658  | NA |
| ASV_16s_26532 | 0.119592102 | -0.027681933 | 3.551196752 | 0.736817392 | 0.99803658  | NA |
| ASV_16s_26533 | 0.119592102 | -0.027681933 | 3.551196752 | 0.736817392 | 0.99803658  | NA |
| ASV_16s_26534 | 0.119592102 | -0.027681933 | 3.551196752 | 0.736817392 | 0.99803658  | NA |
| ASV_16s_26535 | 0.119592102 | -0.027681933 | 3.551196752 | 0.736817392 | 0.99803658  | NA |
| ASV_16s_26536 | 0.104692878 | 0.384087811  | 3.551377813 | 0.576187945 | 0.999116946 | NA |

|               |             |              |             |             |             |    |
|---------------|-------------|--------------|-------------|-------------|-------------|----|
| ASV_16s_26537 | 0.103041638 | 0.382374217  | 3.551402071 | 0.569241175 | 0.999151388 | NA |
| ASV_16s_26538 | 0.071481581 | -0.013857413 | 3.551591258 | 0.513301572 | 0.999396304 | NA |
| ASV_16s_26539 | 0.071481581 | -0.013857413 | 3.551591258 | 0.513301572 | 0.999396304 | NA |
| ASV_16s_26540 | 0.071481581 | -0.013857413 | 3.551591258 | 0.513301572 | 0.999396304 | NA |
| ASV_16s_26541 | 0.071481581 | -0.013857413 | 3.551591258 | 0.513301572 | 0.999396304 | NA |
| ASV_16s_26542 | 0.071481581 | -0.013857413 | 3.551591258 | 0.513301572 | 0.999396304 | NA |
| ASV_16s_26543 | 0.071481581 | -0.013857413 | 3.551591258 | 0.513301572 | 0.999396304 | NA |
| ASV_16s_26544 | 0.071481581 | -0.013857413 | 3.551591258 | 0.513301572 | 0.999396304 | NA |
| ASV_16s_26545 | 0.071481581 | -0.013857413 | 3.551591258 | 0.513301572 | 0.999396304 | NA |
| ASV_16s_26546 | 0.093835316 | 0.408672163  | 3.551409681 | 0.520017073 | 0.999369836 | NA |
| ASV_16s_26547 | 0.081676804 | -0.071746519 | 3.551247784 | 0.523464816 | 0.999355946 | NA |
| ASV_16s_26548 | 0.081676804 | -0.071746519 | 3.551247784 | 0.523464816 | 0.999355946 | NA |
| ASV_16s_26549 | 0.081676804 | -0.071746519 | 3.551247784 | 0.523464816 | 0.999355946 | NA |
| ASV_16s_26550 | 0.081676804 | -0.071746519 | 3.551247784 | 0.523464816 | 0.999355946 | NA |
| ASV_16s_26551 | 0.081676804 | -0.071746519 | 3.551247784 | 0.523464816 | 0.999355946 | NA |
| ASV_16s_26552 | 0.081676804 | -0.071746519 | 3.551247784 | 0.523464816 | 0.999355946 | NA |
| ASV_16s_26553 | 0.081676804 | -0.071746519 | 3.551247784 | 0.523464816 | 0.999355946 | NA |
| ASV_16s_26554 | 0.059653439 | -0.059941888 | 3.55148483  | 0.432190842 | 0.999658851 | NA |
| ASV_16s_26555 | 0.059653439 | -0.059941888 | 3.55148483  | 0.432190842 | 0.999658851 | NA |
| ASV_16s_26556 | 0.059653439 | -0.059941888 | 3.55148483  | 0.432190842 | 0.999658851 | NA |
| ASV_16s_26557 | 0.059653439 | -0.059941888 | 3.55148483  | 0.432190842 | 0.999658851 | NA |
| ASV_16s_26558 | 0.059653439 | -0.059941888 | 3.55148483  | 0.432190842 | 0.999658851 | NA |
| ASV_16s_26559 | 0.059653439 | -0.059941888 | 3.55148483  | 0.432190842 | 0.999658851 | NA |
| ASV_16s_26560 | 0.058581566 | -0.059142809 | 3.551500138 | 0.428138628 | 0.9996694   | NA |
| ASV_16s_26561 | 0.058581566 | -0.059142809 | 3.551500138 | 0.428138628 | 0.9996694   | NA |
| ASV_16s_26562 | 0.058581566 | -0.059142809 | 3.551500138 | 0.428138628 | 0.9996694   | NA |
| ASV_16s_26563 | 0.058581566 | -0.059142809 | 3.551500138 | 0.428138628 | 0.9996694   | NA |
| ASV_16s_26564 | 0.058581566 | -0.059142809 | 3.551500138 | 0.428138628 | 0.9996694   | NA |
| ASV_16s_26565 | 0.058581566 | -0.059142809 | 3.551500138 | 0.428138628 | 0.9996694   | NA |
| ASV_16s_26566 | 0.058581566 | -0.059142809 | 3.551500138 | 0.428138628 | 0.9996694   | NA |
| ASV_16s_26567 | 0.058581566 | -0.059142809 | 3.551500138 | 0.428138628 | 0.9996694   | NA |
| ASV_16s_26568 | 0.058581566 | -0.059142809 | 3.551500138 | 0.428138628 | 0.9996694   | NA |
| ASV_16s_26569 | 0.079368099 | 0.323127329  | 3.551678126 | 0.462775314 | 0.999571691 | NA |
| ASV_16s_26570 | 0.087163049 | 0.429237267  | 3.551675694 | 0.487376028 | 0.999491405 | NA |
| ASV_16s_26571 | 0.098866761 | -0.072553811 | 3.551121944 | 0.601839777 | 0.998981605 | NA |
| ASV_16s_26572 | 0.098866761 | -0.072553811 | 3.551121944 | 0.601839777 | 0.998981605 | NA |
| ASV_16s_26573 | 0.099671681 | 0.360726337  | 3.551631175 | 0.54361547  | 0.99927059  | NA |
| ASV_16s_26574 | 0.072685709 | -0.068728661 | 3.551331601 | 0.484675934 | 0.99950068  | NA |
| ASV_16s_26575 | 0.072685709 | -0.068728661 | 3.551331601 | 0.484675934 | 0.99950068  | NA |
| ASV_16s_26576 | 0.072685709 | -0.068728661 | 3.551331601 | 0.484675934 | 0.99950068  | NA |
| ASV_16s_26577 | 0.072685709 | -0.068728661 | 3.551331601 | 0.484675934 | 0.99950068  | NA |
| ASV_16s_26578 | 0.081540646 | 0.349840667  | 3.551702601 | 0.543062475 | 0.999273029 | NA |
| ASV_16s_26579 | 0.081540646 | 0.349840667  | 3.551702601 | 0.543062475 | 0.999273029 | NA |
| ASV_16s_26580 | 0.081540646 | 0.349840667  | 3.551702601 | 0.543062475 | 0.999273029 | NA |
| ASV_16s_26581 | 0.081540646 | 0.349840667  | 3.551702601 | 0.543062475 | 0.999273029 | NA |
| ASV_16s_26582 | 0.081540646 | 0.349840667  | 3.551702601 | 0.543062475 | 0.999273029 | NA |
| ASV_16s_26583 | 0.081540646 | 0.349840667  | 3.551702601 | 0.543062475 | 0.999273029 | NA |
| ASV_16s_26584 | 0.081540646 | 0.349840667  | 3.551702601 | 0.543062475 | 0.999273029 | NA |
| ASV_16s_26585 | 0.133901316 | 0.360243538  | 3.551351024 | 0.790063913 | 0.997544037 | NA |
| ASV_16s_26586 | 0.133901316 | 0.360243538  | 3.551351024 | 0.790063913 | 0.997544037 | NA |
| ASV_16s_26587 | 0.088049964 | 0.566585     | 3.551565642 | 0.672528502 | 0.998538026 | NA |
| ASV_16s_26588 | 0.072486818 | 0.346675885  | 3.551767769 | 0.504413352 | 0.99943016  | NA |
| ASV_16s_26589 | 0.072486818 | 0.346675885  | 3.551767769 | 0.504413352 | 0.99943016  | NA |
| ASV_16s_26590 | 0.072486818 | 0.346675885  | 3.551767769 | 0.504413352 | 0.99943016  | NA |
| ASV_16s_26591 | 0.072486818 | 0.346675885  | 3.551767769 | 0.504413352 | 0.99943016  | NA |
| ASV_16s_26592 | 0.072486818 | 0.346675885  | 3.551767769 | 0.504413352 | 0.99943016  | NA |
| ASV_16s_26593 | 0.072486818 | 0.346675885  | 3.551767769 | 0.504413352 | 0.99943016  | NA |
| ASV_16s_26594 | 0.072486818 | 0.346675885  | 3.551767769 | 0.504413352 | 0.99943016  | NA |
| ASV_16s_26595 | 0.072486818 | 0.346675885  | 3.551767769 | 0.504413352 | 0.99943016  | NA |
| ASV_16s_26596 | 0.072486818 | 0.346675885  | 3.551767769 | 0.504413352 | 0.99943016  | NA |
| ASV_16s_26597 | 0.072486818 | 0.346675885  | 3.551767769 | 0.504413352 | 0.99943016  | NA |
| ASV_16s_26598 | 0.072486818 | 0.346675885  | 3.551767769 | 0.504413352 | 0.99943016  | NA |
| ASV_16s_26599 | 0.072486818 | 0.346675885  | 3.551767769 | 0.504413352 | 0.99943016  | NA |
| ASV_16s_26600 | 0.072486818 | 0.346675885  | 3.551767769 | 0.504413352 | 0.99943016  | NA |
| ASV_16s_26601 | 0.072486818 | 0.346675885  | 3.551767769 | 0.504413352 | 0.99943016  | NA |
| ASV_16s_26602 | 0.072486818 | 0.346675885  | 3.551767769 | 0.504413352 | 0.99943016  | NA |
| ASV_16s_26603 | 0.072486818 | 0.346675885  | 3.551767769 | 0.504413352 | 0.99943016  | NA |

|               |             |             |             |             |                |
|---------------|-------------|-------------|-------------|-------------|----------------|
| ASV_16s_26604 | 0.072486818 | 0.346675885 | 3.551767769 | 0.504413352 | 0.99943016 NA  |
| ASV_16s_26605 | 0.072486818 | 0.346675885 | 3.551767769 | 0.504413352 | 0.99943016 NA  |
| ASV_16s_26606 | 0.072486818 | 0.346675885 | 3.551767769 | 0.504413352 | 0.99943016 NA  |
| ASV_16s_26607 | 0.072486818 | 0.346675885 | 3.551767769 | 0.504413352 | 0.99943016 NA  |
| ASV_16s_26608 | 0.072486818 | 0.346675885 | 3.551767769 | 0.504413352 | 0.99943016 NA  |
| ASV_16s_26609 | 0.072486818 | 0.346675885 | 3.551767769 | 0.504413352 | 0.99943016 NA  |
| ASV_16s_26610 | 0.072486818 | 0.346675885 | 3.551767769 | 0.504413352 | 0.99943016 NA  |
| ASV_16s_26611 | 0.072486818 | 0.346675885 | 3.551767769 | 0.504413352 | 0.99943016 NA  |
| ASV_16s_26612 | 0.072486818 | 0.346675885 | 3.551767769 | 0.504413352 | 0.99943016 NA  |
| ASV_16s_26613 | 0.072486818 | 0.346675885 | 3.551767769 | 0.504413352 | 0.99943016 NA  |
| ASV_16s_26614 | 0.072486818 | 0.346675885 | 3.551767769 | 0.504413352 | 0.99943016 NA  |
| ASV_16s_26615 | 0.072486818 | 0.346675885 | 3.551767769 | 0.504413352 | 0.99943016 NA  |
| ASV_16s_26616 | 0.072486818 | 0.346675885 | 3.551767769 | 0.504413352 | 0.99943016 NA  |
| ASV_16s_26617 | 0.072486818 | 0.346675885 | 3.551767769 | 0.504413352 | 0.99943016 NA  |
| ASV_16s_26618 | 0.093920777 | 0.31594053  | 3.551348223 | 0.560165086 | 0.999195005 NA |
| ASV_16s_26619 | 0.093920777 | 0.31594053  | 3.551348223 | 0.560165086 | 0.999195005 NA |
| ASV_16s_26620 | 0.093920777 | 0.31594053  | 3.551348223 | 0.560165086 | 0.999195005 NA |
| ASV_16s_26621 | 0.093920777 | 0.31594053  | 3.551348223 | 0.560165086 | 0.999195005 NA |
| ASV_16s_26622 | 0.093920777 | 0.31594053  | 3.551348223 | 0.560165086 | 0.999195005 NA |
| ASV_16s_26623 | 0.093920777 | 0.31594053  | 3.551348223 | 0.560165086 | 0.999195005 NA |
| ASV_16s_26624 | 0.09312478  | 0.31594053  | 3.551354653 | 0.556560558 | 0.999211898 NA |
| ASV_16s_26625 | 0.085953432 | 0.315940634 | 3.551417878 | 0.524593135 | 0.999351356 NA |
| ASV_16s_26626 | 0.082538855 | 0.315940684 | 3.551451772 | 0.509738852 | 0.999410035 NA |
| ASV_16s_26627 | 0.123166034 | 0.315940262 | 3.551169313 | 0.697947619 | 0.998351457 NA |
| ASV_16s_26628 | 0.081184832 | 0.315940705 | 3.551465942 | 0.503957817 | 0.99943186 NA  |
| ASV_16s_26629 | 0.081184832 | 0.315940705 | 3.551465942 | 0.503957817 | 0.99943186 NA  |
| ASV_16s_26630 | 0.081184832 | 0.315940705 | 3.551465942 | 0.503957817 | 0.99943186 NA  |
| ASV_16s_26631 | 0.081184832 | 0.315940705 | 3.551465942 | 0.503957817 | 0.99943186 NA  |
| ASV_16s_26632 | 0.081184832 | 0.315940705 | 3.551465942 | 0.503957817 | 0.99943186 NA  |
| ASV_16s_26633 | 0.081184832 | 0.315940705 | 3.551465942 | 0.503957817 | 0.99943186 NA  |
| ASV_16s_26634 | 0.078789463 | 0.315940631 | 3.551492273 | 0.493751919 | 0.999469039 NA |
| ASV_16s_26635 | 0.078447267 | 0.315940631 | 3.551496164 | 0.492305378 | 0.999474171 NA |
| ASV_16s_26636 | 0.126039216 | 0.315940143 | 3.551156046 | 0.712381899 | 0.998238781 NA |
| ASV_16s_26637 | 0.126039216 | 0.315940143 | 3.551156046 | 0.712381899 | 0.998238781 NA |
| ASV_16s_26638 | 0.075709702 | 0.315939433 | 3.551528481 | 0.480837345 | 0.999513666 NA |
| ASV_16s_26639 | 0.075709702 | 0.315939433 | 3.551528481 | 0.480837345 | 0.999513666 NA |
| ASV_16s_26640 | 0.075709702 | 0.315939433 | 3.551528481 | 0.480837345 | 0.999513666 NA |
| ASV_16s_26641 | 0.075709702 | 0.315939433 | 3.551528481 | 0.480837345 | 0.999513666 NA |
| ASV_16s_26642 | 0.075709702 | 0.315939433 | 3.551528481 | 0.480837345 | 0.999513666 NA |
| ASV_16s_26643 | 0.075709702 | 0.315939433 | 3.551528481 | 0.480837345 | 0.999513666 NA |
| ASV_16s_26644 | 0.075709702 | 0.315939433 | 3.551528481 | 0.480837345 | 0.999513666 NA |
| ASV_16s_26645 | 0.075709702 | 0.315939433 | 3.551528481 | 0.480837345 | 0.999513666 NA |
| ASV_16s_26646 | 0.075709702 | 0.315939433 | 3.551528481 | 0.480837345 | 0.999513666 NA |
| ASV_16s_26647 | 0.075709702 | 0.315939433 | 3.551528481 | 0.480837345 | 0.999513666 NA |
| ASV_16s_26648 | 0.075709702 | 0.315939433 | 3.551528481 | 0.480837345 | 0.999513666 NA |
| ASV_16s_26649 | 0.075709702 | 0.315939433 | 3.551528481 | 0.480837345 | 0.999513666 NA |
| ASV_16s_26650 | 0.075709702 | 0.315939433 | 3.551528481 | 0.480837345 | 0.999513666 NA |
| ASV_16s_26651 | 0.075709702 | 0.315939433 | 3.551528481 | 0.480837345 | 0.999513666 NA |
| ASV_16s_26652 | 0.075709702 | 0.315939433 | 3.551528481 | 0.480837345 | 0.999513666 NA |
| ASV_16s_26653 | 0.075709702 | 0.315939433 | 3.551528481 | 0.480837345 | 0.999513666 NA |
| ASV_16s_26654 | 0.075709702 | 0.315939433 | 3.551528481 | 0.480837345 | 0.999513666 NA |
| ASV_16s_26655 | 0.075709702 | 0.315939433 | 3.551528481 | 0.480837345 | 0.999513666 NA |
| ASV_16s_26656 | 0.075709702 | 0.315939433 | 3.551528481 | 0.480837345 | 0.999513666 NA |
| ASV_16s_26657 | 0.075709702 | 0.315939433 | 3.551528481 | 0.480837345 | 0.999513666 NA |
| ASV_16s_26658 | 0.075709702 | 0.315939433 | 3.551528481 | 0.480837345 | 0.999513666 NA |
| ASV_16s_26659 | 0.075709702 | 0.315939433 | 3.551528481 | 0.480837345 | 0.999513666 NA |
| ASV_16s_26660 | 0.075709702 | 0.315939433 | 3.551528481 | 0.480837345 | 0.999513666 NA |
| ASV_16s_26661 | 0.075709702 | 0.315939433 | 3.551528481 | 0.480837345 | 0.999513666 NA |
| ASV_16s_26662 | 0.142534296 | 0.315940032 | 3.551090742 | 0.794425555 | 0.997500427 NA |
| ASV_16s_26663 | 0.072101153 | 0.686020623 | 3.551469301 | 0.407728695 | 0.99971915 NA  |
| ASV_16s_26664 | 0.130255776 | 0.687290697 | 3.551064086 | 0.631676636 | 0.998807412 NA |
| ASV_16s_26665 | 0.130255776 | 0.687290697 | 3.551064086 | 0.631676636 | 0.998807412 NA |
| ASV_16s_26666 | 0.130255776 | 0.687290697 | 3.551064086 | 0.631676636 | 0.998807412 NA |
| ASV_16s_26667 | 0.130255776 | 0.687290697 | 3.551064086 | 0.631676636 | 0.998807412 NA |
| ASV_16s_26668 | 0.160252745 | 0.733299587 | 3.551245999 | 0.826266771 | 0.99716656 NA  |
| ASV_16s_26669 | 0.118356612 | 0.723182525 | 3.551447437 | 0.646361472 | 0.998714786 NA |
| ASV_16s_26670 | 0.118356612 | 0.723182525 | 3.551447437 | 0.646361472 | 0.998714786 NA |



|               |             |             |             |             |                |
|---------------|-------------|-------------|-------------|-------------|----------------|
| ASV_16s_26738 | 0.09311136  | 0.689364088 | 3.551339853 | 0.506816154 | 0.999421139 NA |
| ASV_16s_26739 | 0.09311136  | 0.689364088 | 3.551339853 | 0.506816154 | 0.999421139 NA |
| ASV_16s_26740 | 0.09311136  | 0.689364088 | 3.551339853 | 0.506816154 | 0.999421139 NA |
| ASV_16s_26741 | 0.09311136  | 0.689364088 | 3.551339853 | 0.506816154 | 0.999421139 NA |
| ASV_16s_26742 | 0.09311136  | 0.689364088 | 3.551339853 | 0.506816154 | 0.999421139 NA |
| ASV_16s_26743 | 0.09311136  | 0.689364088 | 3.551339853 | 0.506816154 | 0.999421139 NA |
| ASV_16s_26744 | 0.09311136  | 0.689364088 | 3.551339853 | 0.506816154 | 0.999421139 NA |
| ASV_16s_26745 | 0.09311136  | 0.689364088 | 3.551339853 | 0.506816154 | 0.999421139 NA |
| ASV_16s_26746 | 0.086585738 | 0.686964668 | 3.551393176 | 0.482308959 | 0.999508715 NA |
| ASV_16s_26747 | 0.089975369 | 0.688501337 | 3.55136527  | 0.494904066 | 0.999464928 NA |
| ASV_16s_26748 | 0.080060117 | 0.683533333 | 3.551452402 | 0.458555539 | 0.99958453 NA  |
| ASV_16s_26749 | 0.095753343 | 0.69006321  | 3.551319741 | 0.516906779 | 0.999382191 NA |
| ASV_16s_26750 | 0.095753343 | 0.69006321  | 3.551319741 | 0.516906779 | 0.999382191 NA |
| ASV_16s_26751 | 0.095753343 | 0.69006321  | 3.551319741 | 0.516906779 | 0.999382191 NA |
| ASV_16s_26752 | 0.095753343 | 0.69006321  | 3.551319741 | 0.516906779 | 0.999382191 NA |
| ASV_16s_26753 | 0.095753343 | 0.69006321  | 3.551319741 | 0.516906779 | 0.999382191 NA |
| ASV_16s_26754 | 0.095753343 | 0.69006321  | 3.551319741 | 0.516906779 | 0.999382191 NA |
| ASV_16s_26755 | 0.095753343 | 0.69006321  | 3.551319741 | 0.516906779 | 0.999382191 NA |
| ASV_16s_26756 | 0.095753343 | 0.69006321  | 3.551319741 | 0.516906779 | 0.999382191 NA |
| ASV_16s_26757 | 0.095753343 | 0.69006321  | 3.551319741 | 0.516906779 | 0.999382191 NA |
| ASV_16s_26758 | 0.095753343 | 0.69006321  | 3.551319741 | 0.516906779 | 0.999382191 NA |
| ASV_16s_26759 | 0.095753343 | 0.69006321  | 3.551319741 | 0.516906779 | 0.999382191 NA |
| ASV_16s_26760 | 0.095753343 | 0.69006321  | 3.551319741 | 0.516906779 | 0.999382191 NA |
| ASV_16s_26761 | 0.095753343 | 0.69006321  | 3.551319741 | 0.516906779 | 0.999382191 NA |
| ASV_16s_26762 | 0.095753343 | 0.69006321  | 3.551319741 | 0.516906779 | 0.999382191 NA |
| ASV_16s_26763 | 0.095753343 | 0.69006321  | 3.551319741 | 0.516906779 | 0.999382191 NA |
| ASV_16s_26764 | 0.095753343 | 0.69006321  | 3.551319741 | 0.516906779 | 0.999382191 NA |
| ASV_16s_26765 | 0.101553922 | 0.691527915 | 3.551279101 | 0.539409924 | 0.999289001 NA |
| ASV_16s_26766 | 0.083226068 | 0.685230194 | 3.551422624 | 0.469958906 | 0.999549215 NA |
| ASV_16s_26767 | 0.075709702 | 0.681086839 | 3.551497012 | 0.44325207  | 0.999628887 NA |
| ASV_16s_26768 | 0.075709702 | 0.681086839 | 3.551497012 | 0.44325207  | 0.999628887 NA |
| ASV_16s_26769 | 0.075709702 | 0.681086839 | 3.551497012 | 0.44325207  | 0.999628887 NA |
| ASV_16s_26770 | 0.075709702 | 0.681086839 | 3.551497012 | 0.44325207  | 0.999628887 NA |
| ASV_16s_26771 | 0.075709702 | 0.681086839 | 3.551497012 | 0.44325207  | 0.999628887 NA |
| ASV_16s_26772 | 0.075709702 | 0.681086839 | 3.551497012 | 0.44325207  | 0.999628887 NA |
| ASV_16s_26773 | 0.075709702 | 0.681086839 | 3.551497012 | 0.44325207  | 0.999628887 NA |
| ASV_16s_26774 | 0.075709702 | 0.681086839 | 3.551497012 | 0.44325207  | 0.999628887 NA |
| ASV_16s_26775 | 0.075709702 | 0.681086839 | 3.551497012 | 0.44325207  | 0.999628887 NA |
| ASV_16s_26776 | 0.075709702 | 0.681086839 | 3.551497012 | 0.44325207  | 0.999628887 NA |
| ASV_16s_26777 | 0.075709702 | 0.681086839 | 3.551497012 | 0.44325207  | 0.999628887 NA |
| ASV_16s_26778 | 0.075709702 | 0.681086839 | 3.551497012 | 0.44325207  | 0.999628887 NA |
| ASV_16s_26779 | 0.075709702 | 0.681086839 | 3.551497012 | 0.44325207  | 0.999628887 NA |
| ASV_16s_26780 | 0.075709702 | 0.681086839 | 3.551497012 | 0.44325207  | 0.999628887 NA |
| ASV_16s_26781 | 0.075709702 | 0.681086839 | 3.551497012 | 0.44325207  | 0.999628887 NA |
| ASV_16s_26782 | 0.075709702 | 0.681086839 | 3.551497012 | 0.44325207  | 0.999628887 NA |
| ASV_16s_26783 | 0.075709702 | 0.681086839 | 3.551497012 | 0.44325207  | 0.999628887 NA |
| ASV_16s_26784 | 0.075709702 | 0.681086839 | 3.551497012 | 0.44325207  | 0.999628887 NA |
| ASV_16s_26785 | 0.075709702 | 0.681086839 | 3.551497012 | 0.44325207  | 0.999628887 NA |
| ASV_16s_26786 | 0.075709702 | 0.681086839 | 3.551497012 | 0.44325207  | 0.999628887 NA |
| ASV_16s_26787 | 0.111221554 | 0.691917507 | 3.551216919 | 0.577788641 | 0.999108878 NA |
| ASV_16s_26788 | 0.111221554 | 0.691917507 | 3.551216919 | 0.577788641 | 0.999108878 NA |
| ASV_16s_26789 | 0.111221554 | 0.691917507 | 3.551216919 | 0.577788641 | 0.999108878 NA |
| ASV_16s_26790 | 0.111221554 | 0.691917507 | 3.551216919 | 0.577788641 | 0.999108878 NA |
| ASV_16s_26791 | 0.111221554 | 0.691917507 | 3.551216919 | 0.577788641 | 0.999108878 NA |
| ASV_16s_26792 | 0.111020298 | 0.691913471 | 3.551218111 | 0.576978829 | 0.999112966 NA |
| ASV_16s_26793 | 0.111020298 | 0.691913471 | 3.551218111 | 0.576978829 | 0.999112966 NA |
| ASV_16s_26794 | 0.111020298 | 0.691913471 | 3.551218111 | 0.576978829 | 0.999112966 NA |
| ASV_16s_26795 | 0.111020298 | 0.691913471 | 3.551218111 | 0.576978829 | 0.999112966 NA |
| ASV_16s_26796 | 0.103265538 | 0.297949109 | 3.551919454 | 0.424249558 | 0.999679311 NA |
| ASV_16s_26797 | 0.103265538 | 0.297949109 | 3.551919454 | 0.424249558 | 0.999679311 NA |
| ASV_16s_26798 | 0.061194324 | 0.306469545 | 3.551965891 | 0.290994741 | 0.999909771 NA |
| ASV_16s_26799 | 0.061194324 | 0.306469545 | 3.551965891 | 0.290994741 | 0.999909771 NA |
| ASV_16s_26800 | 0.061194324 | 0.306469545 | 3.551965891 | 0.290994741 | 0.999909771 NA |
| ASV_16s_26801 | 0.061194324 | 0.306469545 | 3.551965891 | 0.290994741 | 0.999909771 NA |
| ASV_16s_26802 | 0.061194324 | 0.306469545 | 3.551965891 | 0.290994741 | 0.999909771 NA |
| ASV_16s_26803 | 0.061194324 | 0.306469545 | 3.551965891 | 0.290994741 | 0.999909771 NA |
| ASV_16s_26804 | 0.061194324 | 0.306469545 | 3.551965891 | 0.290994741 | 0.999909771 NA |



|               |             |              |             |             |                |
|---------------|-------------|--------------|-------------|-------------|----------------|
| ASV_16s_26872 | 0.061194324 | 0.306469545  | 3.551965891 | 0.290994741 | 0.999909771 NA |
| ASV_16s_26873 | 0.061194324 | 0.306469545  | 3.551965891 | 0.290994741 | 0.999909771 NA |
| ASV_16s_26874 | 0.061194324 | 0.306469545  | 3.551965891 | 0.290994741 | 0.999909771 NA |
| ASV_16s_26875 | 0.061194324 | 0.306469545  | 3.551965891 | 0.290994741 | 0.999909771 NA |
| ASV_16s_26876 | 0.061194324 | 0.306469545  | 3.551965891 | 0.290994741 | 0.999909771 NA |
| ASV_16s_26877 | 0.061194324 | 0.306469545  | 3.551965891 | 0.290994741 | 0.999909771 NA |
| ASV_16s_26878 | 0.061194324 | 0.306469545  | 3.551965891 | 0.290994741 | 0.999909771 NA |
| ASV_16s_26879 | 0.061194324 | 0.306469545  | 3.551965891 | 0.290994741 | 0.999909771 NA |
| ASV_16s_26880 | 0.061194324 | 0.306469545  | 3.551965891 | 0.290994741 | 0.999909771 NA |
| ASV_16s_26881 | 0.061194324 | 0.306469545  | 3.551965891 | 0.290994741 | 0.999909771 NA |
| ASV_16s_26882 | 0.061194324 | 0.306469545  | 3.551965891 | 0.290994741 | 0.999909771 NA |
| ASV_16s_26883 | 0.061194324 | 0.306469545  | 3.551965891 | 0.290994741 | 0.999909771 NA |
| ASV_16s_26884 | 0.061194324 | 0.306469545  | 3.551965891 | 0.290994741 | 0.999909771 NA |
| ASV_16s_26885 | 0.06197108  | 0.15920719   | 3.551915907 | 0.336971734 | 0.999851881 NA |
| ASV_16s_26886 | 0.062488918 | 0.073865803  | 3.551873423 | 0.357693247 | 0.99981893 NA  |
| ASV_16s_26887 | 0.062488918 | 0.073865803  | 3.551873423 | 0.357693247 | 0.99981893 NA  |
| ASV_16s_26888 | 0.062488918 | 0.073865803  | 3.551873423 | 0.357693247 | 0.99981893 NA  |
| ASV_16s_26889 | 0.062488918 | 0.073865803  | 3.551873423 | 0.357693247 | 0.99981893 NA  |
| ASV_16s_26890 | 0.061222844 | 0.084512751  | 3.551881153 | 0.352472707 | 0.999827665 NA |
| ASV_16s_26891 | 0.062747837 | 0.035905627  | 3.55185568  | 0.364581598 | 0.999806943 NA |
| ASV_16s_26892 | 0.062747837 | 0.035905627  | 3.55185568  | 0.364581598 | 0.999806943 NA |
| ASV_16s_26893 | 0.062747837 | 0.035905627  | 3.55185568  | 0.364581598 | 0.999806943 NA |
| ASV_16s_26894 | 0.061228548 | 0.047732984  | 3.551864071 | 0.358391072 | 0.999817739 NA |
| ASV_16s_26895 | 0.062747837 | 0.035905627  | 3.55185568  | 0.364581598 | 0.999806943 NA |
| ASV_16s_26896 | 0.061228548 | 0.047732984  | 3.551864071 | 0.358391072 | 0.999817739 NA |
| ASV_16s_26897 | 0.061234252 | 0.012584121  | 3.551848885 | 0.361559693 | 0.999812267 NA |
| ASV_16s_26898 | 0.063006755 | -2.61E-04    | 3.55183995  | 0.368673749 | 0.999799568 NA |
| ASV_16s_26899 | 0.061234252 | 0.012584121  | 3.551848885 | 0.361559693 | 0.999812267 NA |
| ASV_16s_26900 | 0.063006755 | -2.61E-04    | 3.55183995  | 0.368673749 | 0.999799568 NA |
| ASV_16s_26901 | 0.063265674 | -0.034969881 | 3.551825952 | 0.370333553 | 0.999796522 NA |
| ASV_16s_26902 | 0.063265674 | -0.034969881 | 3.551825952 | 0.370333553 | 0.999796522 NA |
| ASV_16s_26903 | 0.061239956 | -0.021235862 | 3.551835351 | 0.362396323 | 0.999810803 NA |
| ASV_16s_26904 | 0.063524593 | -0.068869144 | 3.551810355 | 0.369450965 | 0.999798146 NA |
| ASV_16s_26905 | 0.06124566  | -0.054024987 | 3.551823243 | 0.360817416 | 0.999813559 NA |
| ASV_16s_26906 | 0.074570738 | -0.134962737 | 3.551741204 | 0.415524852 | 0.999700802 NA |
| ASV_16s_26907 | 0.061251364 | -0.086311669 | 3.551809885 | 0.356636142 | 0.999820723 NA |
| ASV_16s_26908 | 0.063783512 | -0.101914597 | 3.551795884 | 0.365870289 | 0.999804641 NA |
| ASV_16s_26909 | 0.061251364 | -0.086311669 | 3.551809885 | 0.356636142 | 0.999820723 NA |
| ASV_16s_26910 | 0.062776357 | -0.127016763 | 3.551789506 | 0.355295573 | 0.999822979 NA |
| ASV_16s_26911 | 0.07875656  | -0.299493387 | 3.551629885 | 0.371897944 | 0.999793623 NA |
| ASV_16s_26912 | 0.021876234 | 0.011517785  | 3.551930907 | 0.148504311 | 0.999990947 NA |
| ASV_16s_26913 | 0.021876234 | 0.011517785  | 3.551930907 | 0.148504311 | 0.999990947 NA |
| ASV_16s_26914 | 0.021876234 | 0.011517785  | 3.551930907 | 0.148504311 | 0.999990947 NA |
| ASV_16s_26915 | 0.021876234 | 0.011517785  | 3.551930907 | 0.148504311 | 0.999990947 NA |
| ASV_16s_26916 | 0.103811689 | -0.422022732 | 3.551406484 | 0.441908342 | 0.99963262 NA  |
| ASV_16s_26917 | 0.103811689 | -0.422022732 | 3.551406484 | 0.441908342 | 0.99963262 NA  |
| ASV_16s_26918 | 0.103811689 | -0.422022732 | 3.551406484 | 0.441908342 | 0.99963262 NA  |
| ASV_16s_26919 | 0.103811689 | -0.422022732 | 3.551406484 | 0.441908342 | 0.99963262 NA  |
| ASV_16s_26920 | 0.103811689 | -0.422022732 | 3.551406484 | 0.441908342 | 0.99963262 NA  |
| ASV_16s_26921 | 0.094327463 | -0.390124365 | 3.551493409 | 0.406391736 | 0.999722217 NA |
| ASV_16s_26922 | 0.11309309  | -0.450981298 | 3.551323543 | 0.478443849 | 0.999521646 NA |
| ASV_16s_26923 | 0.083488347 | -0.348793778 | 3.551583853 | 0.368361854 | 0.999800137 NA |
| ASV_16s_26924 | 0.083488347 | -0.348793778 | 3.551583853 | 0.368361854 | 0.999800137 NA |
| ASV_16s_26925 | 0.083488347 | -0.348793778 | 3.551583853 | 0.368361854 | 0.999800137 NA |
| ASV_16s_26926 | 0.083488347 | -0.348793778 | 3.551583853 | 0.368361854 | 0.999800137 NA |
| ASV_16s_26927 | 0.083488347 | -0.348793778 | 3.551583853 | 0.368361854 | 0.999800137 NA |
| ASV_16s_26928 | 0.083488347 | -0.348793778 | 3.551583853 | 0.368361854 | 0.999800137 NA |
| ASV_16s_26929 | 0.083488347 | -0.348793778 | 3.551583853 | 0.368361854 | 0.999800137 NA |
| ASV_16s_26930 | 0.083488347 | -0.348793778 | 3.551583853 | 0.368361854 | 0.999800137 NA |
| ASV_16s_26931 | 0.083488347 | -0.348793778 | 3.551583853 | 0.368361854 | 0.999800137 NA |
| ASV_16s_26932 | 0.083488347 | -0.348793778 | 3.551583853 | 0.368361854 | 0.999800137 NA |
| ASV_16s_26933 | 0.083488347 | -0.348793778 | 3.551583853 | 0.368361854 | 0.999800137 NA |
| ASV_16s_26934 | 0.083488347 | -0.348793778 | 3.551583853 | 0.368361854 | 0.999800137 NA |
| ASV_16s_26935 | 0.084184861 | -0.351669876 | 3.551578827 | 0.370729379 | 0.999795791 NA |
| ASV_16s_26936 | 0.076085526 | -0.31681912  | 3.551641427 | 0.34410691  | 0.999841049 NA |
| ASV_16s_26937 | 0.081170119 | -0.339064656 | 3.551601039 | 0.360582625 | 0.999813966 NA |
| ASV_16s_26938 | 0.084533117 | -0.353099191 | 3.551576339 | 0.371918861 | 0.999793584 NA |

|               |             |              |             |             |             |    |
|---------------|-------------|--------------|-------------|-------------|-------------|----|
| ASV_16s_26939 | 0.079779182 | -0.333113709 | 3.551611693 | 0.356001169 | 0.999821794 | NA |
| ASV_16s_26940 | 0.079779182 | -0.333113709 | 3.551611693 | 0.356001169 | 0.999821794 | NA |
| ASV_16s_26941 | 0.084881374 | -0.354494951 | 3.551573698 | 0.373108359 | 0.99979136  | NA |
| ASV_16s_26942 | 0.079315537 | -0.331110572 | 3.551615304 | 0.354488795 | 0.999824327 | NA |
| ASV_16s_26943 | 0.086100273 | -0.35927796  | 3.551564257 | 0.377293592 | 0.999783403 | NA |
| ASV_16s_26944 | 0.086100273 | -0.35927796  | 3.551564257 | 0.377293592 | 0.999783403 | NA |
| ASV_16s_26945 | 0.086100273 | -0.35927796  | 3.551564257 | 0.377293592 | 0.999783403 | NA |
| ASV_16s_26946 | 0.086100273 | -0.35927796  | 3.551564257 | 0.377293592 | 0.999783403 | NA |
| ASV_16s_26947 | 0.086100273 | -0.35927796  | 3.551564257 | 0.377293592 | 0.999783403 | NA |
| ASV_16s_26948 | 0.086100273 | -0.35927796  | 3.551564257 | 0.377293592 | 0.999783403 | NA |
| ASV_16s_26949 | 0.086100273 | -0.35927796  | 3.551564257 | 0.377293592 | 0.999783403 | NA |
| ASV_16s_26950 | 0.086100273 | -0.35927796  | 3.551564257 | 0.377293592 | 0.999783403 | NA |
| ASV_16s_26951 | 0.086100273 | -0.35927796  | 3.551564257 | 0.377293592 | 0.999783403 | NA |
| ASV_16s_26952 | 0.082911403 | -0.346386824 | 3.551588078 | 0.366400336 | 0.999803689 | NA |
| ASV_16s_26953 | 0.081635855 | -0.341032054 | 3.551597541 | 0.362124089 | 0.99981128  | NA |
| ASV_16s_26954 | 0.080998081 | -0.338328067 | 3.551602352 | 0.360006145 | 0.999814964 | NA |
| ASV_16s_26955 | 0.080360307 | -0.335606019 | 3.551607218 | 0.357901901 | 0.999818574 | NA |
| ASV_16s_26956 | 0.080360307 | -0.335606019 | 3.551607218 | 0.357901901 | 0.999818574 | NA |
| ASV_16s_26957 | 0.076533663 | -0.318880719 | 3.551637619 | 0.345575188 | 0.999838753 | NA |
| ASV_16s_26958 | 0.076533663 | -0.318880719 | 3.551637619 | 0.345575188 | 0.999838753 | NA |
| ASV_16s_26959 | 0.076533663 | -0.318880719 | 3.551637619 | 0.345575188 | 0.999838753 | NA |
| ASV_16s_26960 | 0.076533663 | -0.318880719 | 3.551637619 | 0.345575188 | 0.999838753 | NA |
| ASV_16s_26961 | 0.076533663 | -0.318880719 | 3.551637619 | 0.345575188 | 0.999838753 | NA |
| ASV_16s_26962 | 0.076533663 | -0.318880719 | 3.551637619 | 0.345575188 | 0.999838753 | NA |
| ASV_16s_26963 | 0.076533663 | -0.318880719 | 3.551637619 | 0.345575188 | 0.999838753 | NA |
| ASV_16s_26964 | 0.076533663 | -0.318880719 | 3.551637619 | 0.345575188 | 0.999838753 | NA |
| ASV_16s_26965 | 0.076533663 | -0.318880719 | 3.551637619 | 0.345575188 | 0.999838753 | NA |
| ASV_16s_26966 | 0.076533663 | -0.318880719 | 3.551637619 | 0.345575188 | 0.999838753 | NA |
| ASV_16s_26967 | 0.076533663 | -0.318880719 | 3.551637619 | 0.345575188 | 0.999838753 | NA |
| ASV_16s_26968 | 0.076533663 | -0.318880719 | 3.551637619 | 0.345575188 | 0.999838753 | NA |
| ASV_16s_26969 | 0.076533663 | -0.318880719 | 3.551637619 | 0.345575188 | 0.999838753 | NA |
| ASV_16s_26970 | 0.076533663 | -0.318880719 | 3.551637619 | 0.345575188 | 0.999838753 | NA |
| ASV_16s_26971 | 0.076533663 | -0.318880719 | 3.551637619 | 0.345575188 | 0.999838753 | NA |
| ASV_16s_26972 | 0.076533663 | -0.318880719 | 3.551637619 | 0.345575188 | 0.999838753 | NA |
| ASV_16s_26973 | 0.076533663 | -0.318880719 | 3.551637619 | 0.345575188 | 0.999838753 | NA |
| ASV_16s_26974 | 0.071187737 | -0.294711334 | 3.551678266 | 0.329206482 | 0.999863077 | NA |
| ASV_16s_26975 | 0.084452593 | -0.352770379 | 3.551576911 | 0.371644423 | 0.999794095 | NA |
| ASV_16s_26976 | 0.084452593 | -0.352770379 | 3.551576911 | 0.371644423 | 0.999794095 | NA |
| ASV_16s_26977 | 0.084452593 | -0.352770379 | 3.551576911 | 0.371644423 | 0.999794095 | NA |
| ASV_16s_26978 | 0.075411166 | -0.31378748  | 3.551647051 | 0.342005951 | 0.999844293 | NA |
| ASV_16s_26979 | 0.072093815 | -0.298832789 | 3.551671477 | 0.331849856 | 0.999859334 | NA |
| ASV_16s_26980 | 0.070244636 | -0.290297843 | 3.551685588 | 0.326417668 | 0.999866951 | NA |
| ASV_16s_26981 | 0.065078106 | -0.265443926 | 3.551726993 | 0.311964373 | 0.999885818 | NA |
| ASV_16s_26982 | 0.065078106 | -0.265443926 | 3.551726993 | 0.311964373 | 0.999885818 | NA |
| ASV_16s_26983 | 0.065078106 | -0.265443926 | 3.551726993 | 0.311964373 | 0.999885818 | NA |
| ASV_16s_26984 | 0.065078106 | -0.265443926 | 3.551726993 | 0.311964373 | 0.999885818 | NA |
| ASV_16s_26985 | 0.065078106 | -0.265443926 | 3.551726993 | 0.311964373 | 0.999885818 | NA |
| ASV_16s_26986 | 0.065078106 | -0.265443926 | 3.551726993 | 0.311964373 | 0.999885818 | NA |
| ASV_16s_26987 | 0.065078106 | -0.265443926 | 3.551726993 | 0.311964373 | 0.999885818 | NA |
| ASV_16s_26988 | 0.065078106 | -0.265443926 | 3.551726993 | 0.311964373 | 0.999885818 | NA |
| ASV_16s_26989 | 0.065078106 | -0.265443926 | 3.551726993 | 0.311964373 | 0.999885818 | NA |
| ASV_16s_26990 | 0.065078106 | -0.265443926 | 3.551726993 | 0.311964373 | 0.999885818 | NA |
| ASV_16s_26991 | 0.065078106 | -0.265443926 | 3.551726993 | 0.311964373 | 0.999885818 | NA |
| ASV_16s_26992 | 0.065078106 | -0.265443926 | 3.551726993 | 0.311964373 | 0.999885818 | NA |
| ASV_16s_26993 | 0.065078106 | -0.265443926 | 3.551726993 | 0.311964373 | 0.999885818 | NA |
| ASV_16s_26994 | 0.065078106 | -0.265443926 | 3.551726993 | 0.311964373 | 0.999885818 | NA |
| ASV_16s_26995 | 0.065078106 | -0.265443926 | 3.551726993 | 0.311964373 | 0.999885818 | NA |
| ASV_16s_26996 | 0.065078106 | -0.265443926 | 3.551726993 | 0.311964373 | 0.999885818 | NA |
| ASV_16s_26997 | 0.065078106 | -0.265443926 | 3.551726993 | 0.311964373 | 0.999885818 | NA |
| ASV_16s_26998 | 0.065078106 | -0.265443926 | 3.551726993 | 0.311964373 | 0.999885818 | NA |
| ASV_16s_26999 | 0.065078106 | -0.265443926 | 3.551726993 | 0.311964373 | 0.999885818 | NA |
| ASV_16s_27000 | 0.065078106 | -0.265443926 | 3.551726993 | 0.311964373 | 0.999885818 | NA |
| ASV_16s_27001 | 0.065078106 | -0.265443926 | 3.551726993 | 0.311964373 | 0.999885818 | NA |
| ASV_16s_27002 | 0.065078106 | -0.265443926 | 3.551726993 | 0.311964373 | 0.999885818 | NA |
| ASV_16s_27003 | 0.065078106 | -0.265443926 | 3.551726993 | 0.311964373 | 0.999885818 | NA |
| ASV_16s_27004 | 0.065078106 | -0.265443926 | 3.551726993 | 0.311964373 | 0.999885818 | NA |
| ASV_16s_27005 | 0.065078106 | -0.265443926 | 3.551726993 | 0.311964373 | 0.999885818 | NA |





|               |             |              |             |             |                |
|---------------|-------------|--------------|-------------|-------------|----------------|
| ASV_16s_27073 | 0.013570895 | -0.044209194 | 3.551573609 | 0.001088479 | 1 NA           |
| ASV_16s_27074 | 0.013570895 | -0.044209194 | 3.551573609 | 0.001088479 | 1 NA           |
| ASV_16s_27075 | 0.020778659 | -0.108011348 | 3.551431032 | 0.048988557 | 0.999999806 NA |
| ASV_16s_27076 | 0.020778659 | -0.108011348 | 3.551431032 | 0.048988557 | 0.999999806 NA |
| ASV_16s_27077 | 0.039665929 | 0.227472412  | 3.551235421 | 0.153003342 | 0.999989968 NA |
| ASV_16s_27078 | 0.020586545 | 0.246931549  | 3.551596059 | 0.03322894  | 0.99999995 NA  |
| ASV_16s_27079 | 0.027217358 | 0.235861956  | 3.551443652 | 0.074988839 | 0.999999148 NA |
| ASV_16s_27085 | 0.095568199 | 0.595722931  | 3.550837959 | 0.343993989 | 0.999841224 NA |
| ASV_16s_27086 | 0.095568199 | 0.595722931  | 3.550837959 | 0.343993989 | 0.999841224 NA |
| ASV_16s_27087 | 0.043361054 | 0.59486332   | 3.551163683 | 0.141751112 | 0.999992288 NA |
| ASV_16s_27088 | 0.086100273 | 0.686487607  | 3.551322583 | 0.449948251 | 0.999609899 NA |
| ASV_16s_27089 | 0.086100273 | 0.686487607  | 3.551322583 | 0.449948251 | 0.999609899 NA |
| ASV_16s_27090 | 0.086100273 | 0.686487607  | 3.551322583 | 0.449948251 | 0.999609899 NA |
| ASV_16s_27091 | 0.06450578  | 0.254285965  | 3.551936747 | 0.288391888 | 0.999912476 NA |
| ASV_16s_27092 | 0.02680071  | 0.003230412  | 3.551663603 | 0.041757652 | 0.999999889 NA |
| ASV_16s_27093 | 0.069771765 | 0.447230598  | 3.551990038 | 0.272921785 | 0.999927403 NA |
| ASV_16s_27094 | 0.065631052 | -0.068252299 | 3.551814486 | 0.259633178 | 0.999938726 NA |
| ASV_16s_27095 | 0.071215772 | -0.04439716  | 3.551790346 | 0.312955977 | 0.999884587 NA |
| ASV_16s_27096 | 0.065232766 | 0.493873776  | 3.551996601 | 0.23653867  | 0.999955377 NA |
| ASV_16s_27097 | 0.082920199 | -0.208351942 | 3.551816263 | 0.311022797 | 0.999886979 NA |
| ASV_16s_27098 | 0.076631745 | -0.226090157 | 3.551800939 | 0.288031871 | 0.999912846 NA |
| ASV_16s_27099 | 0.063280024 | 0.016590143  | 3.551855159 | 0.249456871 | 0.999609518 NA |
| ASV_16s_27100 | 0.071495892 | 0.395905925  | 3.5519626   | 0.309321643 | 0.999889055 NA |
| ASV_16s_27101 | 0.085395527 | -0.175857316 | 3.551828679 | 0.324253718 | 0.999869904 NA |
| ASV_16s_27102 | 0.079407196 | -0.175857317 | 3.551828679 | 0.303917665 | 0.999895474 NA |
| ASV_16s_27103 | 0.076562843 | -0.175857317 | 3.551828679 | 0.295831221 | 0.99990459 NA  |
| ASV_16s_27104 | 0.075170861 | -0.17585815  | 3.551828678 | 0.290409772 | 0.999910384 NA |
| ASV_16s_27105 | 0.064516667 | -0.155374141 | 3.551836877 | 0.201917371 | 0.999974009 NA |
| ASV_16s_27106 | 0.096051862 | -0.359018317 | 3.551656439 | 0.357135086 | 0.999819878 NA |
| ASV_16s_27107 | 0.073221773 | 0.906477294  | 3.551605466 | 0.192992889 | 0.999977735 NA |
| ASV_16s_27108 | 0.097524855 | 0.314734958  | 3.552000376 | 0.258672504 | 0.999939493 NA |
| ASV_16s_27109 | 0.080756232 | -0.126958463 | 3.551837744 | 0.317810356 | 0.999878427 NA |
| ASV_16s_27110 | 0.096043061 | 0.435352515  | 3.551793976 | 0.407034211 | 0.999720746 NA |
| ASV_16s_27111 | 0.098892605 | 0.600821616  | 3.551878992 | 0.422682088 | 0.999683248 NA |
| ASV_16s_27112 | 0.086942101 | -0.030615423 | 3.551842397 | 0.34433375  | 0.999840695 NA |
| ASV_16s_27113 | 0.085349781 | -0.088005103 | 3.55178739  | 0.342379698 | 0.999843719 NA |
| ASV_16s_27114 | 0.080414471 | -0.088005455 | 3.551787388 | 0.32786982  | 0.999864943 NA |
| ASV_16s_27115 | 0.080414471 | -0.088005455 | 3.551787388 | 0.32786982  | 0.999864943 NA |
| ASV_16s_27116 | 0.081542639 | -0.088005103 | 3.55178739  | 0.332056883 | 0.999859038 NA |
| ASV_16s_27117 | 0.081807498 | -0.088005455 | 3.551787388 | 0.331979117 | 0.999859149 NA |
| ASV_16s_27118 | 0.081807498 | -0.088005455 | 3.551787388 | 0.331979117 | 0.999859149 NA |
| ASV_16s_27119 | 0.081807498 | -0.088005455 | 3.551787388 | 0.331979117 | 0.999859149 NA |
| ASV_16s_27120 | 0.082413282 | -0.088005455 | 3.551787388 | 0.334625204 | 0.999855328 NA |
| ASV_16s_27121 | 0.081032391 | -0.064065636 | 3.551856541 | 0.220058759 | 0.999965122 NA |
| ASV_16s_27122 | 0.076591714 | -0.088005455 | 3.551787388 | 0.316407594 | 0.99988023 NA  |
| ASV_16s_27123 | 0.067831318 | 0.191176669  | 3.551816273 | 0.294293945 | 0.999906259 NA |
| ASV_16s_27124 | 0.080469846 | -0.029757705 | 3.551843305 | 0.331512121 | 0.999859816 NA |
| ASV_16s_27125 | 0.088353402 | -0.009659023 | 3.55166859  | 0.47198262  | 0.999542741 NA |
| ASV_16s_27126 | 0.064916853 | 0.70630132   | 3.55188121  | 0.173249254 | 0.999984622 NA |
| ASV_16s_27127 | 0.089459572 | -0.041739073 | 3.551731442 | 0.364248206 | 0.999807535 NA |
| ASV_16s_27128 | 0.07742215  | -0.042660626 | 3.551721116 | 0.332790802 | 0.999857985 NA |
| ASV_16s_27129 | 0.090165834 | -0.341004678 | 3.551583525 | 0.375890727 | 0.999786093 NA |
| ASV_16s_27130 | 0.066452131 | 0.257803812  | 3.551808299 | 0.300422113 | 0.999899486 NA |
| ASV_16s_27131 | 0.065494673 | 0.910751792  | 3.551356849 | 0.127713459 | 0.999994617 NA |
| ASV_16s_27132 | 0.08208005  | 0.330678906  | 3.55193061  | 0.314397389 | 0.999882781 NA |
| ASV_16s_27133 | 0.067064437 | 0.624160299  | 3.551907394 | 0.30818261  | 0.99989043 NA  |
| ASV_16s_27134 | 0.091748287 | -0.017724288 | 3.551626266 | 0.506074672 | 0.999423933 NA |
| ASV_16s_27135 | 0.087665557 | 0.006511365  | 3.551684437 | 0.370162012 | 0.999796839 NA |
| ASV_16s_27136 | 0.079244233 | 0.035794187  | 3.551965006 | 0.24710097  | 0.999948218 NA |
| ASV_16s_27137 | 0.086877154 | 0.466029185  | 3.551729441 | 0.219346597 | 0.999965506 NA |
| ASV_16s_27138 | 0.080516081 | 0.006567646  | 3.551685469 | 0.352412723 | 0.999827763 NA |
| ASV_16s_27139 | 0.077026817 | -0.343115793 | 3.55157908  | 0.274872571 | 0.999925627 NA |
| ASV_16s_27140 | 0.06823383  | -0.20547167  | 3.551659856 | 0.294136679 | 0.999906428 NA |
| ASV_16s_27141 | 0.06148856  | 0.035139332  | 3.551962696 | 0.226295649 | 0.999961631 NA |
| ASV_16s_27142 | 0.0766083   | 0.006638103  | 3.551686762 | 0.342544878 | 0.999843465 NA |
| ASV_16s_27143 | 0.074153985 | 0.356266714  | 3.551639963 | 0.316067583 | 0.999880664 NA |
| ASV_16s_27144 | 0.07491359  | 0.061684234  | 3.551907924 | 0.281877084 | 0.999918999 NA |

|               |             |              |             |             |                |
|---------------|-------------|--------------|-------------|-------------|----------------|
| ASV_16s_27145 | 0.085871543 | 0.056273689  | 3.551619615 | 0.377242737 | 0.999783501 NA |
| ASV_16s_27146 | 0.080833142 | 0.055906229  | 3.551605406 | 0.368406822 | 0.999800055 NA |
| ASV_16s_27147 | 0.072489638 | 0.56685765   | 3.551685041 | 0.187564438 | 0.999979809 NA |
| ASV_16s_27148 | 0.07917463  | 0.123639469  | 3.551286812 | 0.178280029 | 0.999983035 NA |
| ASV_16s_27149 | 0.117697075 | -0.207582301 | 3.551882446 | 0.41598775  | 0.999699687 NA |
| ASV_16s_27150 | 0.083899027 | 0.106460709  | 3.551570674 | 0.385496322 | 0.999767207 NA |
| ASV_16s_27151 | 0.083899027 | 0.106460709  | 3.551570674 | 0.385496322 | 0.999767207 NA |
| ASV_16s_27152 | 0.080306429 | 0.10602358   | 3.551554832 | 0.381993265 | 0.999774222 NA |
| ASV_16s_27153 | 0.089265287 | 0.467383758  | 3.551671964 | 0.450788264 | 0.999607471 NA |
| ASV_16s_27154 | 0.088501039 | 0.518941371  | 3.551478938 | 0.417708666 | 0.999695518 NA |
| ASV_16s_27155 | 0.099130164 | 0.012473625  | 3.55189447  | 0.33348097  | 0.999856989 NA |
| ASV_16s_27156 | 0.080389137 | 0.858639012  | 3.551802741 | 0.317982568 | 0.999878204 NA |
| ASV_16s_27157 | 0.080389137 | 0.858639012  | 3.551802741 | 0.317982568 | 0.999878204 NA |
| ASV_16s_27158 | 0.080389137 | 0.858639012  | 3.551802741 | 0.317982568 | 0.999878204 NA |
| ASV_16s_27159 | 0.080389137 | 0.858639012  | 3.551802741 | 0.317982568 | 0.999878204 NA |
| ASV_16s_27160 | 0.080389137 | 0.858639012  | 3.551802741 | 0.317982568 | 0.999878204 NA |
| ASV_16s_27161 | 0.080389137 | 0.858639012  | 3.551802741 | 0.317982568 | 0.999878204 NA |
| ASV_16s_27162 | 0.080389137 | 0.858639012  | 3.551802741 | 0.317982568 | 0.999878204 NA |
| ASV_16s_27163 | 0.080389137 | 0.858639012  | 3.551802741 | 0.317982568 | 0.999878204 NA |
| ASV_16s_27164 | 0.080389137 | 0.858639012  | 3.551802741 | 0.317982568 | 0.999878204 NA |
| ASV_16s_27165 | 0.080389137 | 0.858639012  | 3.551802741 | 0.317982568 | 0.999878204 NA |
| ASV_16s_27166 | 0.080389137 | 0.858639012  | 3.551802741 | 0.317982568 | 0.999878204 NA |
| ASV_16s_27167 | 0.080389137 | 0.858639012  | 3.551802741 | 0.317982568 | 0.999878204 NA |
| ASV_16s_27168 | 0.110715588 | 0.316269445  | 3.552005306 | 0.277138513 | 0.999923526 NA |
| ASV_16s_27169 | 0.085176668 | 0.920774972  | 3.551696201 | 0.331698209 | 0.999859551 NA |
| ASV_16s_27170 | 0.085176668 | 0.920774972  | 3.551696201 | 0.331698209 | 0.999859551 NA |
| ASV_16s_27171 | 0.088181036 | 0.932407076  | 3.551671886 | 0.33985162  | 0.999847572 NA |
| ASV_16s_27172 | 0.067842834 | 0.848665799  | 3.551833867 | 0.289892794 | 0.999910923 NA |
| ASV_16s_27173 | 0.067842834 | 0.848665799  | 3.551833867 | 0.289892794 | 0.999910923 NA |
| ASV_16s_27174 | 0.067842834 | 0.848665799  | 3.551833867 | 0.289892794 | 0.999910923 NA |
| ASV_16s_27175 | 0.067842834 | 0.848665799  | 3.551833867 | 0.289892794 | 0.999910923 NA |
| ASV_16s_27176 | 0.084030369 | 0.916169219  | 3.551705932 | 0.328575646 | 0.99986396 NA  |
| ASV_16s_27177 | 0.048482927 | 0.859239109  | 3.551869351 | 0.121668365 | 0.999995446 NA |
| ASV_16s_27178 | 0.076338484 | 0.884588781  | 3.551773942 | 0.309188907 | 0.999889215 NA |
| ASV_16s_27179 | 0.076338484 | 0.884588781  | 3.551773942 | 0.309188907 | 0.999889215 NA |
| ASV_16s_27180 | 0.076338484 | 0.884588781  | 3.551773942 | 0.309188907 | 0.999889215 NA |
| ASV_16s_27181 | 0.070040461 | 0.858094507  | 3.55181984  | 0.294636404 | 0.999905889 NA |
| ASV_16s_27182 | 0.070040461 | 0.858094507  | 3.55181984  | 0.294636404 | 0.999905889 NA |
| ASV_16s_27183 | 0.070040461 | 0.858094507  | 3.55181984  | 0.294636404 | 0.999905889 NA |
| ASV_16s_27184 | 0.110674219 | 1.01177284   | 3.551498685 | 0.407613173 | 0.999719416 NA |
| ASV_16s_27185 | 0.110674219 | 1.01177284   | 3.551498685 | 0.407613173 | 0.999719416 NA |
| ASV_16s_27186 | 0.085174127 | 1.026829407  | 3.551791158 | 0.172648803 | 0.999984804 NA |
| ASV_16s_27187 | 0.06640317  | 0.324839104  | 3.552038928 | 0.305149938 | 0.999894033 NA |
| ASV_16s_27188 | 0.06640317  | 0.324839104  | 3.552038928 | 0.305149938 | 0.999894033 NA |
| ASV_16s_27189 | 0.06640317  | 0.324839104  | 3.552038928 | 0.305149938 | 0.999894033 NA |
| ASV_16s_27190 | 0.06640317  | 0.324839104  | 3.552038928 | 0.305149938 | 0.999894033 NA |
| ASV_16s_27191 | 0.06640317  | 0.324839104  | 3.552038928 | 0.305149938 | 0.999894033 NA |
| ASV_16s_27192 | 0.06640317  | 0.324839104  | 3.552038928 | 0.305149938 | 0.999894033 NA |
| ASV_16s_27193 | 0.06640317  | 0.324839104  | 3.552038928 | 0.305149938 | 0.999894033 NA |
| ASV_16s_27194 | 0.06640317  | 0.324839104  | 3.552038928 | 0.305149938 | 0.999894033 NA |
| ASV_16s_27195 | 0.080389137 | 0.326662919  | 3.552018251 | 0.345763925 | 0.999838457 NA |
| ASV_16s_27196 | 0.080389137 | 0.326662919  | 3.552018251 | 0.345763925 | 0.999838457 NA |
| ASV_16s_27197 | 0.080389137 | 0.326662919  | 3.552018251 | 0.345763925 | 0.999838457 NA |
| ASV_16s_27198 | 0.080389137 | 0.326662919  | 3.552018251 | 0.345763925 | 0.999838457 NA |
| ASV_16s_27199 | 0.080389137 | 0.326662919  | 3.552018251 | 0.345763925 | 0.999838457 NA |
| ASV_16s_27200 | 0.080389137 | 0.326662919  | 3.552018251 | 0.345763925 | 0.999838457 NA |
| ASV_16s_27201 | 0.080389137 | 0.326662919  | 3.552018251 | 0.345763925 | 0.999838457 NA |
| ASV_16s_27202 | 0.088913832 | 0.329052609  | 3.551998805 | 0.37358131  | 0.999790471 NA |
| ASV_16s_27203 | 0.088913832 | 0.329052609  | 3.551998805 | 0.37358131  | 0.999790471 NA |
| ASV_16s_27204 | 0.088913832 | 0.329052609  | 3.551998805 | 0.37358131  | 0.999790471 NA |
| ASV_16s_27205 | 0.088913832 | 0.329052609  | 3.551998805 | 0.37358131  | 0.999790471 NA |
| ASV_16s_27206 | 0.116470284 | 0.338589178  | 3.551929674 | 0.475556571 | 0.999531152 NA |
| ASV_16s_27207 | 0.116470284 | 0.338589178  | 3.551929674 | 0.475556571 | 0.999531152 NA |
| ASV_16s_27208 | 0.101306138 | 0.093276519  | 3.551982006 | 0.305403775 | 0.999893735 NA |
| ASV_16s_27209 | 0.093500762 | 0.768907262  | 3.551882728 | 0.238502637 | 0.999954102 NA |
| ASV_16s_27210 | 0.051458491 | 0.324996194  | 3.552041391 | 0.270669009 | 0.999929417 NA |
| ASV_16s_27211 | 0.051458491 | 0.324996194  | 3.552041391 | 0.270669009 | 0.999929417 NA |

|               |             |              |             |             |                |
|---------------|-------------|--------------|-------------|-------------|----------------|
| ASV_16s_27212 | 0.051458491 | 0.324996194  | 3.552041391 | 0.270669009 | 0.999929417 NA |
| ASV_16s_27213 | 0.051458491 | 0.324996194  | 3.552041391 | 0.270669009 | 0.999929417 NA |
| ASV_16s_27214 | 0.051458491 | 0.324996194  | 3.552041391 | 0.270669009 | 0.999929417 NA |
| ASV_16s_27215 | 0.051458491 | 0.324996194  | 3.552041391 | 0.270669009 | 0.999929417 NA |
| ASV_16s_27216 | 0.051458491 | 0.324996194  | 3.552041391 | 0.270669009 | 0.999929417 NA |
| ASV_16s_27217 | 0.051458491 | 0.324996194  | 3.552041391 | 0.270669009 | 0.999929417 NA |
| ASV_16s_27218 | 0.051458491 | 0.324996194  | 3.552041391 | 0.270669009 | 0.999929417 NA |
| ASV_16s_27219 | 0.051458491 | 0.324996194  | 3.552041391 | 0.270669009 | 0.999929417 NA |
| ASV_16s_27220 | 0.069675945 | 0.325041578  | 3.552035322 | 0.314018154 | 0.999883258 NA |
| ASV_16s_27221 | 0.069675945 | 0.325041578  | 3.552035322 | 0.314018154 | 0.999883258 NA |
| ASV_16s_27222 | 0.069675945 | 0.325041578  | 3.552035322 | 0.314018154 | 0.999883258 NA |
| ASV_16s_27223 | 0.069675945 | 0.325041578  | 3.552035322 | 0.314018154 | 0.999883258 NA |
| ASV_16s_27224 | 0.069675945 | 0.325041578  | 3.552035322 | 0.314018154 | 0.999883258 NA |
| ASV_16s_27225 | 0.120814004 | 0.340100426  | 3.551914614 | 0.492899106 | 0.999472069 NA |
| ASV_16s_27226 | 0.106605252 | 0.562548362  | 3.55201471  | 0.319574168 | 0.999876134 NA |
| ASV_16s_27227 | 0.118677327 | 0.339363381  | 3.551921921 | 0.484327911 | 0.999501867 NA |
| ASV_16s_27228 | 0.082831547 | 0.327360805  | 3.552012479 | 0.353505559 | 0.99982596 NA  |
| ASV_16s_27229 | 0.098336899 | 0.278122312  | 3.551846828 | 0.260435089 | 0.99993808 NA  |
| ASV_16s_27230 | 0.089570944 | -0.351685237 | 3.551639375 | 0.382371729 | 0.999773471 NA |
| ASV_16s_27231 | 0.089570944 | -0.351685237 | 3.551639375 | 0.382371729 | 0.999773471 NA |
| ASV_16s_27232 | 0.086100273 | -0.34016734  | 3.551670314 | 0.37059434  | 0.999796041 NA |
| ASV_16s_27233 | 0.086100273 | -0.34016734  | 3.551670314 | 0.37059434  | 0.999796041 NA |
| ASV_16s_27234 | 0.086100273 | -0.34016734  | 3.551670314 | 0.37059434  | 0.999796041 NA |
| ASV_16s_27235 | 0.086100273 | -0.34016734  | 3.551670314 | 0.37059434  | 0.999796041 NA |
| ASV_16s_27236 | 0.102832937 | -0.392860751 | 3.551521899 | 0.429933769 | 0.999664755 NA |
| ASV_16s_27237 | 0.102832937 | -0.392860751 | 3.551521899 | 0.429933769 | 0.999664755 NA |
| ASV_16s_27238 | 0.121800355 | -0.413384804 | 3.55148858  | 0.286569059 | 0.999914337 NA |
| ASV_16s_27239 | 0.073980486 | -0.295240782 | 3.551765758 | 0.33216357  | 0.999858885 NA |
| ASV_16s_27240 | 0.073980486 | -0.295240782 | 3.551765758 | 0.33216357  | 0.999858885 NA |
| ASV_16s_27241 | 0.073980486 | -0.295240782 | 3.551765758 | 0.33216357  | 0.999858885 NA |
| ASV_16s_27242 | 0.073980486 | -0.295240782 | 3.551765758 | 0.33216357  | 0.999858885 NA |
| ASV_16s_27243 | 0.086801718 | -0.376025656 | 3.551777534 | 0.193451958 | 0.999977554 NA |
| ASV_16s_27244 | 0.051392172 | -0.188516379 | 3.551886454 | 0.275884219 | 0.999924694 NA |
| ASV_16s_27245 | 0.051392172 | -0.188516379 | 3.551886454 | 0.275884219 | 0.999924694 NA |
| ASV_16s_27246 | 0.051392172 | -0.188516379 | 3.551886454 | 0.275884219 | 0.999924694 NA |
| ASV_16s_27247 | 0.051392172 | -0.188516379 | 3.551886454 | 0.275884219 | 0.999924694 NA |
| ASV_16s_27248 | 0.051392172 | -0.188516379 | 3.551886454 | 0.275884219 | 0.999924694 NA |
| ASV_16s_27249 | 0.057742939 | -0.221921616 | 3.551858202 | 0.289144731 | 0.999911699 NA |
| ASV_16s_27250 | 0.075602628 | -0.301602035 | 3.55175457  | 0.337027835 | 0.999851798 NA |
| ASV_16s_27251 | 0.067269091 | -0.267314171 | 3.551807324 | 0.313057262 | 0.999884461 NA |
| ASV_16s_27252 | 0.067269091 | -0.267314171 | 3.551807324 | 0.313057262 | 0.999884461 NA |
| ASV_16s_27253 | 0.099852071 | 0.975669963  | 3.551575005 | 0.373711358 | 0.999790226 NA |
| ASV_16s_27254 | 0.092687589 | 0.94967583   | 3.551632334 | 0.352537231 | 0.999827559 NA |
| ASV_16s_27255 | 0.092687589 | 0.94967583   | 3.551632334 | 0.352537231 | 0.999827559 NA |
| ASV_16s_27256 | 0.092687589 | 0.94967583   | 3.551632334 | 0.352537231 | 0.999827559 NA |
| ASV_16s_27257 | 0.092857539 | 0.993670689  | 3.551675693 | 0.274500141 | 0.999925968 NA |
| ASV_16s_27258 | 0.101396931 | 0.981060296  | 3.551563439 | 0.378426783 | 0.999781213 NA |
| ASV_16s_27259 | 0.076195404 | 0.935933495  | 3.551533813 | 0.25407371  | 0.999943074 NA |
| ASV_16s_27260 | 0.076195404 | 0.935933495  | 3.551533813 | 0.25407371  | 0.999943074 NA |
| ASV_16s_27261 | 0.039766661 | 0.760733572  | 3.551828846 | 0.159717492 | 0.999988371 NA |
| ASV_16s_27262 | 0.039766661 | 0.760733572  | 3.551828846 | 0.159717492 | 0.999988371 NA |
| ASV_16s_27263 | 0.109300893 | 1.05031579   | 3.551260796 | 0.345911715 | 0.999838224 NA |
| ASV_16s_27264 | 0.049283447 | 0.814239138  | 3.551772959 | 0.195501596 | 0.999976729 NA |
| ASV_16s_27265 | 0.106970014 | 1.043286544  | 3.551278192 | 0.338635702 | 0.999849402 NA |
| ASV_16s_27266 | 0.068174066 | 0.902945609  | 3.551606448 | 0.236835145 | 0.999955186 NA |
| ASV_16s_27267 | 0.068174066 | 0.902945609  | 3.551606448 | 0.236835145 | 0.999955186 NA |
| ASV_16s_27268 | 0.068174066 | 0.902945609  | 3.551606448 | 0.236835145 | 0.999955186 NA |
| ASV_16s_27269 | 0.091784199 | 0.508694076  | 3.551619945 | 0.383895257 | 0.999770431 NA |
| ASV_16s_27270 | 0.093962216 | 1.000881985  | 3.551386226 | 0.299963298 | 0.999900004 NA |
| ASV_16s_27271 | 0.093962216 | 1.000881985  | 3.551386226 | 0.299963298 | 0.999900004 NA |
| ASV_16s_27272 | 0.086173794 | 0.344506687  | 3.551738903 | 0.305122365 | 0.999894066 NA |
| ASV_16s_27273 | 0.086173794 | 0.344506687  | 3.551738903 | 0.305122365 | 0.999894066 NA |
| ASV_16s_27274 | 0.086173794 | 0.344506687  | 3.551738903 | 0.305122365 | 0.999894066 NA |
| ASV_16s_27275 | 0.086173794 | 0.344506687  | 3.551738903 | 0.305122365 | 0.999894066 NA |
| ASV_16s_27276 | 0.086173794 | 0.344506687  | 3.551738903 | 0.305122365 | 0.999894066 NA |
| ASV_16s_27277 | 0.086173794 | 0.344506687  | 3.551738903 | 0.305122365 | 0.999894066 NA |
| ASV_16s_27278 | 0.086173794 | 0.344506687  | 3.551738903 | 0.305122365 | 0.999894066 NA |

|               |             |              |             |             |             |    |
|---------------|-------------|--------------|-------------|-------------|-------------|----|
| ASV_16s_27279 | 0.086173794 | 0.344506687  | 3.551738903 | 0.305122365 | 0.999894066 | NA |
| ASV_16s_27280 | 0.078172962 | 0.343210692  | 3.551766717 | 0.280537035 | 0.999920298 | NA |
| ASV_16s_27281 | 0.078172962 | 0.343210692  | 3.551766717 | 0.280537035 | 0.999920298 | NA |
| ASV_16s_27282 | 0.078172962 | 0.343210692  | 3.551766717 | 0.280537035 | 0.999920298 | NA |
| ASV_16s_27283 | 0.078172962 | 0.343210692  | 3.551766717 | 0.280537035 | 0.999920298 | NA |
| ASV_16s_27284 | 0.070977846 | 0.342792587  | 3.551788891 | 0.26032999  | 0.999938165 | NA |
| ASV_16s_27285 | 0.070977846 | 0.342792587  | 3.551788891 | 0.26032999  | 0.999938165 | NA |
| ASV_16s_27286 | 0.070977846 | 0.342792587  | 3.551788891 | 0.26032999  | 0.999938165 | NA |
| ASV_16s_27287 | 0.058591374 | 0.342013539  | 3.55183288  | 0.231030656 | 0.999958822 | NA |
| ASV_16s_27288 | 0.058591374 | 0.342013539  | 3.55183288  | 0.231030656 | 0.999958822 | NA |
| ASV_16s_27289 | 0.058591374 | 0.342013539  | 3.55183288  | 0.231030656 | 0.999958822 | NA |
| ASV_16s_27290 | 0.058591374 | 0.342013539  | 3.55183288  | 0.231030656 | 0.999958822 | NA |
| ASV_16s_27291 | 0.058591374 | 0.342013539  | 3.55183288  | 0.231030656 | 0.999958822 | NA |
| ASV_16s_27292 | 0.058591374 | 0.342013539  | 3.55183288  | 0.231030656 | 0.999958822 | NA |
| ASV_16s_27293 | 0.100369703 | 0.346928213  | 3.551694642 | 0.353499507 | 0.99982597  | NA |
| ASV_16s_27294 | 0.100369703 | 0.346928213  | 3.551694642 | 0.353499507 | 0.99982597  | NA |
| ASV_16s_27295 | 0.06339379  | 0.342323545  | 3.551814948 | 0.241477707 | 0.999952122 | NA |
| ASV_16s_27296 | 0.080389137 | -0.34565469  | 3.551400484 | 0.289239827 | 0.999911601 | NA |
| ASV_16s_27297 | 0.035617275 | -0.127477682 | 3.551718059 | 0.163966949 | 0.999987272 | NA |
| ASV_16s_27298 | 0.035617275 | -0.127477682 | 3.551718059 | 0.163966949 | 0.999987272 | NA |
| ASV_16s_27299 | 0.087372204 | -0.370124969 | 3.551345172 | 0.311515354 | 0.999886373 | NA |
| ASV_16s_27300 | 0.087372204 | -0.370124969 | 3.551345172 | 0.311515354 | 0.999886373 | NA |
| ASV_16s_27301 | 0.087372204 | -0.370124969 | 3.551345172 | 0.311515354 | 0.999886373 | NA |
| ASV_16s_27302 | 0.087372204 | -0.370124969 | 3.551345172 | 0.311515354 | 0.999886373 | NA |
| ASV_16s_27303 | 0.087372204 | -0.370124969 | 3.551345172 | 0.311515354 | 0.999886373 | NA |
| ASV_16s_27304 | 0.087372204 | -0.370124969 | 3.551345172 | 0.311515354 | 0.999886373 | NA |
| ASV_16s_27305 | 0.087372204 | -0.370124969 | 3.551345172 | 0.311515354 | 0.999886373 | NA |
| ASV_16s_27306 | 0.087372204 | -0.370124969 | 3.551345172 | 0.311515354 | 0.999886373 | NA |
| ASV_16s_27307 | 0.112704778 | -0.435168172 | 3.55116185  | 0.402236315 | 0.999731602 | NA |
| ASV_16s_27308 | 0.112704778 | -0.435168172 | 3.55116185  | 0.402236315 | 0.999731602 | NA |
| ASV_16s_27309 | 0.122060104 | -0.435168172 | 3.55116185  | 0.436738973 | 0.999646739 | NA |
| ASV_16s_27310 | 0.116328794 | -0.435168172 | 3.55116185  | 0.415613593 | 0.999700588 | NA |
| ASV_16s_27311 | 0.116328794 | -0.435168172 | 3.55116185  | 0.415613593 | 0.999700588 | NA |
| ASV_16s_27312 | 0.116328794 | -0.435168172 | 3.55116185  | 0.415613593 | 0.999700588 | NA |
| ASV_16s_27313 | 0.116328794 | -0.435168172 | 3.55116185  | 0.415613593 | 0.999700588 | NA |
| ASV_16s_27314 | 0.116328794 | -0.435168172 | 3.55116185  | 0.415613593 | 0.999700588 | NA |
| ASV_16s_27315 | 0.06833394  | -0.298278569 | 3.551490503 | 0.254590567 | 0.999942679 | NA |
| ASV_16s_27316 | 0.107614158 | -0.427551422 | 3.551191397 | 0.383127242 | 0.999771967 | NA |
| ASV_16s_27317 | 0.107614158 | -0.427551422 | 3.551191397 | 0.383127242 | 0.999771967 | NA |
| ASV_16s_27318 | 0.107614158 | -0.427551422 | 3.551191397 | 0.383127242 | 0.999771967 | NA |
| ASV_16s_27319 | 0.043256363 | -0.174876877 | 3.551661209 | 0.195896294 | 0.999976567 | NA |
| ASV_16s_27320 | 0.039643526 | -0.153319706 | 3.551686552 | 0.180991585 | 0.999982133 | NA |
| ASV_16s_27321 | 0.039643526 | -0.153319706 | 3.551686552 | 0.180991585 | 0.999982133 | NA |
| ASV_16s_27322 | 0.078187747 | 0.943779596  | 3.551515929 | 0.258732026 | 0.999939446 | NA |
| ASV_16s_27323 | 0.078187747 | 0.943779596  | 3.551515929 | 0.258732026 | 0.999939446 | NA |
| ASV_16s_27324 | 0.078187747 | 0.943779596  | 3.551515929 | 0.258732026 | 0.999939446 | NA |
| ASV_16s_27325 | 0.031426888 | 0.705257639  | 3.551866109 | 0.126782888 | 0.999994751 | NA |
| ASV_16s_27326 | 0.031426888 | 0.705257639  | 3.551866109 | 0.126782888 | 0.999994751 | NA |
| ASV_16s_27327 | 0.031426888 | 0.705257639  | 3.551866109 | 0.126782888 | 0.999994751 | NA |
| ASV_16s_27328 | 0.077755776 | 0.942093233  | 3.55151975  | 0.257710059 | 0.999940255 | NA |
| ASV_16s_27329 | 0.070977846 | -0.077059543 | 3.551281644 | 0.446105531 | 0.999620875 | NA |
| ASV_16s_27330 | 0.070977846 | -0.077059543 | 3.551281644 | 0.446105531 | 0.999620875 | NA |
| ASV_16s_27331 | 0.070977846 | -0.077059543 | 3.551281644 | 0.446105531 | 0.999620875 | NA |
| ASV_16s_27332 | 0.070977846 | -0.077059543 | 3.551281644 | 0.446105531 | 0.999620875 | NA |
| ASV_16s_27333 | 0.070977846 | -0.077059543 | 3.551281644 | 0.446105531 | 0.999620875 | NA |
| ASV_16s_27334 | 0.070977846 | -0.077059543 | 3.551281644 | 0.446105531 | 0.999620875 | NA |
| ASV_16s_27335 | 0.070977846 | -0.077059543 | 3.551281644 | 0.446105531 | 0.999620875 | NA |
| ASV_16s_27336 | 0.070977846 | -0.077059543 | 3.551281644 | 0.446105531 | 0.999620875 | NA |
| ASV_16s_27337 | 0.070977846 | -0.077059543 | 3.551281644 | 0.446105531 | 0.999620875 | NA |
| ASV_16s_27338 | 0.070977846 | -0.077059543 | 3.551281644 | 0.446105531 | 0.999620875 | NA |
| ASV_16s_27339 | 0.070977846 | -0.077059543 | 3.551281644 | 0.446105531 | 0.999620875 | NA |
| ASV_16s_27340 | 0.070977846 | -0.077059543 | 3.551281644 | 0.446105531 | 0.999620875 | NA |
| ASV_16s_27341 | 0.07453202  | 0.152897053  | 3.551269389 | 0.568370635 | 0.999155639 | NA |
| ASV_16s_27342 | 0.060523617 | -0.073893634 | 3.551400417 | 0.402275451 | 0.999731514 | NA |
| ASV_16s_27343 | 0.060523617 | -0.073893634 | 3.551400417 | 0.402275451 | 0.999731514 | NA |
| ASV_16s_27344 | 0.060523617 | -0.073893634 | 3.551400417 | 0.402275451 | 0.999731514 | NA |
| ASV_16s_27345 | 0.060523617 | -0.073893634 | 3.551400417 | 0.402275451 | 0.999731514 | NA |

|               |             |              |             |             |             |    |
|---------------|-------------|--------------|-------------|-------------|-------------|----|
| ASV_16s_27346 | 0.060523617 | -0.073893634 | 3.551400417 | 0.402275451 | 0.999731514 | NA |
| ASV_16s_27347 | 0.060523617 | -0.073893634 | 3.551400417 | 0.402275451 | 0.999731514 | NA |
| ASV_16s_27348 | 0.060523617 | -0.073893634 | 3.551400417 | 0.402275451 | 0.999731514 | NA |
| ASV_16s_27349 | 0.060523617 | -0.073893634 | 3.551400417 | 0.402275451 | 0.999731514 | NA |
| ASV_16s_27350 | 0.060523617 | -0.073893634 | 3.551400417 | 0.402275451 | 0.999731514 | NA |
| ASV_16s_27351 | 0.060523617 | -0.073893634 | 3.551400417 | 0.402275451 | 0.999731514 | NA |
| ASV_16s_27352 | 0.060523617 | -0.073893634 | 3.551400417 | 0.402275451 | 0.999731514 | NA |
| ASV_16s_27353 | 0.060523617 | -0.073893634 | 3.551400417 | 0.402275451 | 0.999731514 | NA |
| ASV_16s_27354 | 0.060523617 | -0.073893634 | 3.551400417 | 0.402275451 | 0.999731514 | NA |
| ASV_16s_27355 | 0.060523617 | -0.073893634 | 3.551400417 | 0.402275451 | 0.999731514 | NA |
| ASV_16s_27356 | 0.060523617 | -0.073893634 | 3.551400417 | 0.402275451 | 0.999731514 | NA |
| ASV_16s_27357 | 0.060523617 | -0.073893634 | 3.551400417 | 0.402275451 | 0.999731514 | NA |
| ASV_16s_27358 | 0.060523617 | -0.073893634 | 3.551400417 | 0.402275451 | 0.999731514 | NA |
| ASV_16s_27359 | 0.060523617 | -0.073893634 | 3.551400417 | 0.402275451 | 0.999731514 | NA |
| ASV_16s_27360 | 0.060523617 | -0.073893634 | 3.551400417 | 0.402275451 | 0.999731514 | NA |
| ASV_16s_27361 | 0.060523617 | -0.073893634 | 3.551400417 | 0.402275451 | 0.999731514 | NA |
| ASV_16s_27362 | 0.060523617 | -0.073893634 | 3.551400417 | 0.402275451 | 0.999731514 | NA |
| ASV_16s_27363 | 0.060523617 | -0.073893634 | 3.551400417 | 0.402275451 | 0.999731514 | NA |
| ASV_16s_27364 | 0.060523617 | -0.073893634 | 3.551400417 | 0.402275451 | 0.999731514 | NA |
| ASV_16s_27365 | 0.060523617 | -0.073893634 | 3.551400417 | 0.402275451 | 0.999731514 | NA |
| ASV_16s_27366 | 0.068286744 | -0.076959915 | 3.5513115   | 0.434500804 | 0.999652736 | NA |
| ASV_16s_27367 | 0.068286744 | -0.076959915 | 3.5513115   | 0.434500804 | 0.999652736 | NA |
| ASV_16s_27368 | 0.068286744 | -0.076959915 | 3.5513115   | 0.434500804 | 0.999652736 | NA |
| ASV_16s_27369 | 0.039665929 | 0.227472412  | 3.551235421 | 0.153003342 | 0.999989968 | NA |
| ASV_16s_27370 | 0.042493574 | 0.225938297  | 3.551204341 | 0.170238231 | 0.999985521 | NA |
| ASV_16s_27371 | 0.070492847 | 0.315163244  | 3.55169193  | 0.268326956 | 0.99993147  | NA |
| ASV_16s_27372 | 0.04505774  | 0.224631963  | 3.551179344 | 0.185611777 | 0.99998052  | NA |
| ASV_16s_27373 | 0.04505774  | 0.224631963  | 3.551179344 | 0.185611777 | 0.99998052  | NA |
| ASV_16s_27374 | 0.04505774  | 0.224631963  | 3.551179344 | 0.185611777 | 0.99998052  | NA |
| ASV_16s_27375 | 0.04505774  | 0.224631963  | 3.551179344 | 0.185611777 | 0.99998052  | NA |
| ASV_16s_27376 | 0.04505774  | 0.224631963  | 3.551179344 | 0.185611777 | 0.99998052  | NA |
| ASV_16s_27377 | 0.045021749 | 0.224649771  | 3.551179676 | 0.185398105 | 0.999980597 | NA |
| ASV_16s_27378 | 0.045009752 | 0.224655712  | 3.551179786 | 0.185326869 | 0.999980623 | NA |
| ASV_16s_27379 | 0.045003754 | 0.224658682  | 3.551179842 | 0.185291249 | 0.999980635 | NA |
| ASV_16s_27380 | 0.044967763 | 0.224676517  | 3.551180175 | 0.185077496 | 0.999980712 | NA |
| ASV_16s_27381 | 0.044967763 | 0.224676517  | 3.551180175 | 0.185077496 | 0.999980712 | NA |
| ASV_16s_27382 | 0.044967763 | 0.224676517  | 3.551180175 | 0.185077496 | 0.999980712 | NA |
| ASV_16s_27383 | 0.044967763 | 0.224676517  | 3.551180175 | 0.185077496 | 0.999980712 | NA |
| ASV_16s_27384 | 0.044967763 | 0.224676517  | 3.551180175 | 0.185077496 | 0.999980712 | NA |
| ASV_16s_27385 | 0.072445257 | 0.310979235  | 3.551486375 | 0.437087155 | 0.9996458   | NA |
| ASV_16s_27386 | 0.072445257 | 0.310979235  | 3.551486375 | 0.437087155 | 0.9996458   | NA |
| ASV_16s_27387 | 0.072445257 | 0.310979235  | 3.551486375 | 0.437087155 | 0.9996458   | NA |
| ASV_16s_27388 | 0.072445257 | 0.310979235  | 3.551486375 | 0.437087155 | 0.9996458   | NA |
| ASV_16s_27389 | 0.076901469 | 0.310975946  | 3.551434991 | 0.456489098 | 0.999590721 | NA |
| ASV_16s_27390 | 0.076901469 | 0.310975946  | 3.551434991 | 0.456489098 | 0.999590721 | NA |
| ASV_16s_27391 | 0.076901469 | 0.310975946  | 3.551434991 | 0.456489098 | 0.999590721 | NA |
| ASV_16s_27392 | 0.076901469 | 0.310975946  | 3.551434991 | 0.456489098 | 0.999590721 | NA |
| ASV_16s_27393 | 0.076901469 | 0.310975946  | 3.551434991 | 0.456489098 | 0.999590721 | NA |
| ASV_16s_27394 | 0.076901469 | 0.310975946  | 3.551434991 | 0.456489098 | 0.999590721 | NA |
| ASV_16s_27395 | 0.076901469 | 0.310975946  | 3.551434991 | 0.456489098 | 0.999590721 | NA |
| ASV_16s_27396 | 0.076787878 | 0.310976025  | 3.551436227 | 0.455988164 | 0.999592212 | NA |
| ASV_16s_27397 | 0.078199577 | 0.310974999  | 3.551421109 | 0.462236163 | 0.999573346 | NA |
| ASV_16s_27398 | 0.078199577 | 0.310974999  | 3.551421109 | 0.462236163 | 0.999573346 | NA |
| ASV_16s_27399 | 0.078199577 | 0.310974999  | 3.551421109 | 0.462236163 | 0.999573346 | NA |
| ASV_16s_27400 | 0.078199577 | 0.310974999  | 3.551421109 | 0.462236163 | 0.999573346 | NA |
| ASV_16s_27401 | 0.078199577 | 0.310974999  | 3.551421109 | 0.462236163 | 0.999573346 | NA |
| ASV_16s_27402 | 0.078199577 | 0.310974999  | 3.551421109 | 0.462236163 | 0.999573346 | NA |
| ASV_16s_27403 | 0.073741583 | 0.31097824   | 3.55147082  | 0.442658566 | 0.999630539 | NA |
| ASV_16s_27404 | 0.067054591 | 0.311445675  | 3.551553083 | 0.414332582 | 0.999703659 | NA |
| ASV_16s_27405 | 0.072176441 | 0.310979448  | 3.551489695 | 0.435919759 | 0.999648942 | NA |
| ASV_16s_27406 | 0.076658059 | 0.310976116  | 3.551437645 | 0.455416079 | 0.99959391  | NA |
| ASV_16s_27407 | 0.047464773 | 0.59499091   | 3.551125832 | 0.163434774 | 0.999987414 | NA |
| ASV_16s_27408 | 0.047464773 | 0.59499091   | 3.551125832 | 0.163434774 | 0.999987414 | NA |
| ASV_16s_27409 | 0.047464773 | 0.59499091   | 3.551125832 | 0.163434774 | 0.999987414 | NA |
| ASV_16s_27410 | 0.047464773 | 0.59499091   | 3.551125832 | 0.163434774 | 0.999987414 | NA |
| ASV_16s_27411 | 0.068780408 | 0.685894006  | 3.55151312  | 0.387047466 | 0.999764053 | NA |
| ASV_16s_27412 | 0.068780408 | 0.685894006  | 3.55151312  | 0.387047466 | 0.999764053 | NA |

|               |             |              |             |             |                |
|---------------|-------------|--------------|-------------|-------------|----------------|
| ASV_16s_27413 | 0.080204571 | 0.686314375  | 3.551378322 | 0.42772324  | 0.999670468 NA |
| ASV_16s_27414 | 0.066011573 | 0.34253025   | 3.551918179 | 0.191404246 | 0.999978357 NA |
| ASV_16s_27415 | 0.070373555 | -0.062541954 | 3.551421989 | 0.410994596 | 0.99971156 NA  |
| ASV_16s_27416 | 0.1529844   | 0.059716462  | 3.551888691 | 0.465957558 | 0.999561831 NA |
| ASV_16s_27417 | 0.100988442 | -0.410766449 | 3.551755885 | 0.15896511  | 0.999988558 NA |
| ASV_16s_27418 | 0.064606378 | 0.32433739   | 3.552022922 | 0.264645752 | 0.999934611 NA |
| ASV_16s_27419 | 0.091045439 | -0.446964196 | 3.55159649  | 0.193272178 | 0.999977625 NA |
| ASV_16s_27420 | 0.064487763 | 0.011442478  | 3.55180294  | 0.385250165 | 0.999767704 NA |
| ASV_16s_27421 | 0.060062497 | 0.550321506  | 3.55197465  | 0.312389332 | 0.999885292 NA |
| ASV_16s_27422 | 0.095876359 | 0.053426129  | 3.551664147 | 0.532068467 | 0.999320382 NA |
| ASV_16s_27423 | 0.086881738 | 0.319013042  | 3.551976567 | 0.202202402 | 0.999973883 NA |
| ASV_16s_27424 | 0.081877813 | 0.399593224  | 3.551805569 | 0.357831454 | 0.999818694 NA |
| ASV_16s_27425 | 0.087284312 | 0.515192579  | 3.55163142  | 0.434588533 | 0.999652502 NA |
| ASV_16s_27426 | 0.066740055 | 0.581490281  | 3.55190632  | 0.290297252 | 0.999910501 NA |
| ASV_16s_27427 | 0.068762113 | 0.147504707  | 3.551836206 | 0.406177468 | 0.999722706 NA |
| ASV_16s_27428 | 0.100117164 | 0.823326291  | 3.551564178 | 0.3745337   | 0.999788673 NA |
| ASV_16s_27429 | 0.083147279 | 0.868222942  | 3.551788426 | 0.324999396 | 0.999868891 NA |
| ASV_16s_27430 | 0.083147279 | 0.868222942  | 3.551788426 | 0.324999396 | 0.999868891 NA |
| ASV_16s_27431 | 0.150236949 | 1.046712033  | 3.551357064 | 0.541496954 | 0.999279904 NA |
| ASV_16s_27432 | 0.150236949 | 1.046712033  | 3.551357064 | 0.541496954 | 0.999279904 NA |
| ASV_16s_27433 | 0.092687589 | 0.30019749   | 3.551940554 | 0.386163472 | 0.999765854 NA |
| ASV_16s_27434 | 0.11309309  | -0.450981298 | 3.551323543 | 0.478443849 | 0.999521646 NA |
| ASV_16s_27435 | 0.11309309  | -0.450981298 | 3.551323543 | 0.478443849 | 0.999521646 NA |
| ASV_16s_27436 | 0.11309309  | -0.450981298 | 3.551323543 | 0.478443849 | 0.999521646 NA |
| ASV_16s_27437 | 0.100491042 | 0.774449235  | 3.551472887 | 0.401332388 | 0.999733614 NA |
| ASV_16s_27438 | 0.160782409 | 0.980279119  | 3.551336047 | 0.562802162 | 0.999182492 NA |
| ASV_16s_27439 | 0.087107727 | 0.809500488  | 3.551689541 | 0.321728148 | 0.999873292 NA |
| ASV_16s_27440 | 0.119942051 | 0.903557625  | 3.551526086 | 0.418301748 | 0.999694072 NA |
| ASV_16s_27441 | 0.077589915 | 0.801279739  | 3.551701159 | 0.296198952 | 0.999904188 NA |
| ASV_16s_27442 | 0.07577316  | 0.796104276  | 3.551708577 | 0.291975336 | 0.999908737 NA |
| ASV_16s_27443 | 0.120329325 | 0.282771372  | 3.551697245 | 0.498081983 | 0.999453474 NA |
| ASV_16s_27444 | 0.120329325 | 0.282771372  | 3.551697245 | 0.498081983 | 0.999453474 NA |
| ASV_16s_27445 | 0.120329325 | 0.282771372  | 3.551697245 | 0.498081983 | 0.999453474 NA |
| ASV_16s_27446 | 0.03030032  | 0.299176498  | 3.551952274 | 0.179916053 | 0.999982495 NA |
| ASV_16s_27447 | 0.03030032  | 0.299176498  | 3.551952274 | 0.179916053 | 0.999982495 NA |
| ASV_16s_27448 | 0.03030032  | 0.299176498  | 3.551952274 | 0.179916053 | 0.999982495 NA |
| ASV_16s_27449 | 0.108310929 | 0.283796632  | 3.551725405 | 0.449525246 | 0.999611118 NA |
| ASV_16s_27450 | 0.042488287 | 0.296088455  | 3.5519252   | 0.238480026 | 0.999954117 NA |
| ASV_16s_27451 | 0.042488287 | 0.296088455  | 3.5519252   | 0.238480026 | 0.999954117 NA |
| ASV_16s_27452 | 0.042488287 | 0.296088455  | 3.5519252   | 0.238480026 | 0.999954117 NA |
| ASV_16s_27453 | 0.120891621 | -0.393655378 | 3.551476526 | 0.499141744 | 0.999449618 NA |
| ASV_16s_27454 | 0.160374634 | 0.979533563  | 3.551338793 | 0.561270597 | 0.999189775 NA |
| ASV_16s_27455 | 0.115967406 | -0.428304999 | 3.551410335 | 0.480610557 | 0.999514426 NA |
| ASV_16s_27456 | 0.115967406 | -0.428304999 | 3.551410335 | 0.480610557 | 0.999514426 NA |
| ASV_16s_27457 | 0.13824353  | -0.449828308 | 3.551336525 | 0.569898116 | 0.99914817 NA  |
| ASV_16s_27458 | 0.13824353  | -0.449828308 | 3.551336525 | 0.569898116 | 0.99914817 NA  |
| ASV_16s_27459 | 0.120504106 | 0.158322272  | 3.551816007 | 0.472391347 | 0.999541425 NA |
| ASV_16s_27460 | 0.06485783  | 0.44008052   | 3.551883617 | 0.339710258 | 0.999847786 NA |
| ASV_16s_27461 | 0.084682112 | 0.321189311  | 3.551932177 | 0.284401953 | 0.999916513 NA |
| ASV_16s_27462 | 0.080389137 | -0.34565469  | 3.551400484 | 0.289239827 | 0.999911601 NA |
| ASV_16s_27463 | 0.089136358 | 0.984033733  | 3.551428347 | 0.286641928 | 0.999914263 NA |
| ASV_16s_27464 | 0.089136358 | 0.984033733  | 3.551428347 | 0.286641928 | 0.999914263 NA |
| ASV_16s_27465 | 0.089136358 | 0.984033733  | 3.551428347 | 0.286641928 | 0.999914263 NA |
| ASV_16s_27466 | 0.089136358 | 0.984033733  | 3.551428347 | 0.286641928 | 0.999914263 NA |
| ASV_16s_27467 | 0.089136358 | 0.984033733  | 3.551428347 | 0.286641928 | 0.999914263 NA |
| ASV_16s_27468 | 0.089136358 | 0.984033733  | 3.551428347 | 0.286641928 | 0.999914263 NA |
| ASV_16s_27469 | 0.089136358 | 0.984033733  | 3.551428347 | 0.286641928 | 0.999914263 NA |
| ASV_16s_27470 | 0.074609548 | 0.466572683  | 3.551732369 | 0.362976928 | 0.999809783 NA |
| ASV_16s_27471 | 0.050792802 | -0.065525008 | 3.551529513 | 0.365253363 | 0.999805745 NA |
| ASV_16s_27472 | 0.050792802 | -0.065525008 | 3.551529513 | 0.365253363 | 0.999805745 NA |
| ASV_16s_27473 | 0.157999375 | -0.028441587 | 3.551033911 | 0.944450559 | 0.995675553 NA |
| ASV_16s_27474 | 0.157999375 | -0.028441587 | 3.551033911 | 0.944450559 | 0.995675553 NA |
| ASV_16s_27475 | 0.157999375 | -0.028441587 | 3.551033911 | 0.944450559 | 0.995675553 NA |
| ASV_16s_27476 | 0.157999375 | -0.028441587 | 3.551033911 | 0.944450559 | 0.995675553 NA |
| ASV_16s_27477 | 0.140557549 | -0.028251596 | 3.551097206 | 0.85049754  | 0.996893809 NA |
| ASV_16s_27478 | 0.124071786 | 0.155433849  | 3.551230591 | 0.845219142 | 0.996954626 NA |
| ASV_16s_27479 | 0.126745044 | 0.250581282  | 3.55117067  | 0.942987018 | 0.995696561 NA |

|               |             |              |             |             |                |
|---------------|-------------|--------------|-------------|-------------|----------------|
| ASV_16s_27480 | 0.109449162 | 0.35960593   | 3.55129733  | 0.811024483 | 0.99732981 NA  |
| ASV_16s_27481 | 0.106338323 | 0.412432814  | 3.551338748 | 0.76989619  | 0.997739173 NA |
| ASV_16s_27482 | 0.140557549 | -0.028251596 | 3.551097206 | 0.85049754  | 0.996893809 NA |
| ASV_16s_27483 | 0.140557549 | -0.028251596 | 3.551097206 | 0.85049754  | 0.996893809 NA |
| ASV_16s_27484 | 0.140557549 | -0.028251596 | 3.551097206 | 0.85049754  | 0.996893809 NA |
| ASV_16s_27485 | 0.112117596 | -0.026065805 | 3.551238768 | 0.701688307 | 0.998322731 NA |
| ASV_16s_27486 | 0.11149985  | 0.331248016  | 3.551275138 | 0.832476849 | 0.997098217 NA |
| ASV_16s_27487 | 0.112117596 | -0.026065805 | 3.551238768 | 0.701688307 | 0.998322731 NA |
| ASV_16s_27488 | 0.112117596 | -0.026065805 | 3.551238768 | 0.701688307 | 0.998322731 NA |
| ASV_16s_27489 | 0.112117596 | -0.026065805 | 3.551238768 | 0.701688307 | 0.998322731 NA |
| ASV_16s_27490 | 0.112117596 | -0.026065805 | 3.551238768 | 0.701688307 | 0.998322731 NA |
| ASV_16s_27491 | 0.112117596 | -0.026065805 | 3.551238768 | 0.701688307 | 0.998322731 NA |
| ASV_16s_27492 | 0.112117596 | -0.026065805 | 3.551238768 | 0.701688307 | 0.998322731 NA |
| ASV_16s_27493 | 0.112117596 | -0.026065805 | 3.551238768 | 0.701688307 | 0.998322731 NA |
| ASV_16s_27494 | 0.087433746 | 0.351730568  | 3.551623977 | 0.496778975 | 0.99945819 NA  |
| ASV_16s_27495 | 0.087787818 | -0.019926182 | 3.551421276 | 0.580925161 | 0.999092926 NA |
| ASV_16s_27496 | 0.067013983 | -0.008249003 | 3.551629546 | 0.48594787  | 0.999496325 NA |
| ASV_16s_27497 | 0.067013983 | -0.008249003 | 3.551629546 | 0.48594787  | 0.999496325 NA |
| ASV_16s_27498 | 0.067013983 | -0.008249003 | 3.551629546 | 0.48594787  | 0.999496325 NA |
| ASV_16s_27499 | 0.067013983 | -0.008249003 | 3.551629546 | 0.48594787  | 0.999496325 NA |
| ASV_16s_27500 | 0.067013983 | -0.008249003 | 3.551629546 | 0.48594787  | 0.999496325 NA |
| ASV_16s_27501 | 0.076572004 | -0.070072089 | 3.551293315 | 0.494799643 | 0.999465301 NA |
| ASV_16s_27502 | 0.076572004 | -0.070072089 | 3.551293315 | 0.494799643 | 0.999465301 NA |
| ASV_16s_27503 | 0.076572004 | -0.070072089 | 3.551293315 | 0.494799643 | 0.999465301 NA |
| ASV_16s_27504 | 0.076572004 | -0.070072089 | 3.551293315 | 0.494799643 | 0.999465301 NA |
| ASV_16s_27505 | 0.076572004 | -0.070072089 | 3.551293315 | 0.494799643 | 0.999465301 NA |
| ASV_16s_27506 | 0.076572004 | -0.070072089 | 3.551293315 | 0.494799643 | 0.999465301 NA |
| ASV_16s_27507 | 0.076572004 | -0.070072089 | 3.551293315 | 0.494799643 | 0.999465301 NA |
| ASV_16s_27508 | 0.084656054 | 0.266819545  | 3.551545974 | 0.475478327 | 0.999531408 NA |
| ASV_16s_27509 | 0.055925099 | -0.05706252  | 3.551540649 | 0.407068712 | 0.999720667 NA |
| ASV_16s_27510 | 0.055925099 | -0.05706252  | 3.551540649 | 0.407068712 | 0.999720667 NA |
| ASV_16s_27511 | 0.055925099 | -0.05706252  | 3.551540649 | 0.407068712 | 0.999720667 NA |
| ASV_16s_27512 | 0.055925099 | -0.05706252  | 3.551540649 | 0.407068712 | 0.999720667 NA |
| ASV_16s_27513 | 0.055925099 | -0.05706252  | 3.551540649 | 0.407068712 | 0.999720667 NA |
| ASV_16s_27514 | 0.055925099 | -0.05706252  | 3.551540649 | 0.407068712 | 0.999720667 NA |
| ASV_16s_27515 | 0.054920218 | -0.056253019 | 3.551556795 | 0.403189539 | 0.999729468 NA |
| ASV_16s_27516 | 0.054920218 | -0.056253019 | 3.551556795 | 0.403189539 | 0.999729468 NA |
| ASV_16s_27517 | 0.054920218 | -0.056253019 | 3.551556795 | 0.403189539 | 0.999729468 NA |
| ASV_16s_27518 | 0.054920218 | -0.056253019 | 3.551556795 | 0.403189539 | 0.999729468 NA |
| ASV_16s_27519 | 0.054920218 | -0.056253019 | 3.551556795 | 0.403189539 | 0.999729468 NA |
| ASV_16s_27520 | 0.054920218 | -0.056253019 | 3.551556795 | 0.403189539 | 0.999729468 NA |
| ASV_16s_27521 | 0.054920218 | -0.056253019 | 3.551556795 | 0.403189539 | 0.999729468 NA |
| ASV_16s_27522 | 0.054920218 | -0.056253019 | 3.551556795 | 0.403189539 | 0.999729468 NA |
| ASV_16s_27523 | 0.054920218 | -0.056253019 | 3.551556795 | 0.403189539 | 0.999729468 NA |
| ASV_16s_27524 | 0.054920218 | -0.056253019 | 3.551556795 | 0.403189539 | 0.999729468 NA |
| ASV_16s_27525 | 0.054920218 | -0.056253019 | 3.551556795 | 0.403189539 | 0.999729468 NA |
| ASV_16s_27526 | 0.092687589 | -0.072412286 | 3.551162289 | 0.570393954 | 0.999145736 NA |
| ASV_16s_27527 | 0.092687589 | -0.072412286 | 3.551162289 | 0.570393954 | 0.999145736 NA |
| ASV_16s_27528 | 0.092687589 | -0.072412286 | 3.551162289 | 0.570393954 | 0.999145736 NA |
| ASV_16s_27529 | 0.092687589 | -0.072412286 | 3.551162289 | 0.570393954 | 0.999145736 NA |
| ASV_16s_27530 | 0.092687589 | -0.072412286 | 3.551162289 | 0.570393954 | 0.999145736 NA |
| ASV_16s_27531 | 0.068142852 | -0.065876793 | 3.551379469 | 0.457419311 | 0.999587942 NA |
| ASV_16s_27532 | 0.068142852 | -0.065876793 | 3.551379469 | 0.457419311 | 0.999587942 NA |
| ASV_16s_27533 | 0.068142852 | -0.065876793 | 3.551379469 | 0.457419311 | 0.999587942 NA |
| ASV_16s_27534 | 0.068142852 | -0.065876793 | 3.551379469 | 0.457419311 | 0.999587942 NA |
| ASV_16s_27535 | 0.068142852 | -0.065876793 | 3.551379469 | 0.457419311 | 0.999587942 NA |
| ASV_16s_27536 | 0.076444356 | 0.34777747   | 3.551741106 | 0.514402566 | 0.999392017 NA |
| ASV_16s_27537 | 0.076444356 | 0.34777747   | 3.551741106 | 0.514402566 | 0.999392017 NA |
| ASV_16s_27538 | 0.076444356 | 0.34777747   | 3.551741106 | 0.514402566 | 0.999392017 NA |
| ASV_16s_27539 | 0.076444356 | 0.34777747   | 3.551741106 | 0.514402566 | 0.999392017 NA |
| ASV_16s_27540 | 0.076444356 | 0.34777747   | 3.551741106 | 0.514402566 | 0.999392017 NA |
| ASV_16s_27541 | 0.076444356 | 0.34777747   | 3.551741106 | 0.514402566 | 0.999392017 NA |
| ASV_16s_27542 | 0.076444356 | 0.34777747   | 3.551741106 | 0.514402566 | 0.999392017 NA |
| ASV_16s_27543 | 0.076444356 | 0.34777747   | 3.551741106 | 0.514402566 | 0.999392017 NA |
| ASV_16s_27544 | 0.076444356 | 0.34777747   | 3.551741106 | 0.514402566 | 0.999392017 NA |
| ASV_16s_27545 | 0.076444356 | 0.34777747   | 3.551741106 | 0.514402566 | 0.999392017 NA |
| ASV_16s_27546 | 0.125532484 | 0.360228286  | 3.551401139 | 0.752983969 | 0.997894691 NA |



|               |             |             |             |             |                |
|---------------|-------------|-------------|-------------|-------------|----------------|
| ASV_16s_27547 | 0.125532484 | 0.360228286 | 3.551401139 | 0.752983969 | 0.997894691 NA |
| ASV_16s_27548 | 0.125532484 | 0.360228286 | 3.551401139 | 0.752983969 | 0.997894691 NA |
| ASV_16s_27549 | 0.110776168 | 0.338465207 | 3.551906281 | 0.489714358 | 0.999483278 NA |
| ASV_16s_27550 | 0.067956391 | 0.345285779 | 3.551788137 | 0.476995441 | 0.999526431 NA |
| ASV_16s_27551 | 0.067956391 | 0.345285779 | 3.551788137 | 0.476995441 | 0.999526431 NA |
| ASV_16s_27552 | 0.067956391 | 0.345285779 | 3.551788137 | 0.476995441 | 0.999526431 NA |
| ASV_16s_27553 | 0.067956391 | 0.345285779 | 3.551788137 | 0.476995441 | 0.999526431 NA |
| ASV_16s_27554 | 0.067956391 | 0.345285779 | 3.551788137 | 0.476995441 | 0.999526431 NA |
| ASV_16s_27555 | 0.067956391 | 0.345285779 | 3.551788137 | 0.476995441 | 0.999526431 NA |
| ASV_16s_27556 | 0.067956391 | 0.345285779 | 3.551788137 | 0.476995441 | 0.999526431 NA |
| ASV_16s_27557 | 0.067956391 | 0.345285779 | 3.551788137 | 0.476995441 | 0.999526431 NA |
| ASV_16s_27558 | 0.067956391 | 0.345285779 | 3.551788137 | 0.476995441 | 0.999526431 NA |
| ASV_16s_27559 | 0.067956391 | 0.345285779 | 3.551788137 | 0.476995441 | 0.999526431 NA |
| ASV_16s_27560 | 0.067956391 | 0.345285779 | 3.551788137 | 0.476995441 | 0.999526431 NA |
| ASV_16s_27561 | 0.067956391 | 0.345285779 | 3.551788137 | 0.476995441 | 0.999526431 NA |
| ASV_16s_27562 | 0.067956391 | 0.345285779 | 3.551788137 | 0.476995441 | 0.999526431 NA |
| ASV_16s_27563 | 0.067956391 | 0.345285779 | 3.551788137 | 0.476995441 | 0.999526431 NA |
| ASV_16s_27564 | 0.067956391 | 0.345285779 | 3.551788137 | 0.476995441 | 0.999526431 NA |
| ASV_16s_27565 | 0.067956391 | 0.345285779 | 3.551788137 | 0.476995441 | 0.999526431 NA |
| ASV_16s_27566 | 0.067956391 | 0.345285779 | 3.551788137 | 0.476995441 | 0.999526431 NA |
| ASV_16s_27567 | 0.067956391 | 0.345285779 | 3.551788137 | 0.476995441 | 0.999526431 NA |
| ASV_16s_27568 | 0.067956391 | 0.345285779 | 3.551788137 | 0.476995441 | 0.999526431 NA |
| ASV_16s_27569 | 0.067956391 | 0.345285779 | 3.551788137 | 0.476995441 | 0.999526431 NA |
| ASV_16s_27570 | 0.067956391 | 0.345285779 | 3.551788137 | 0.476995441 | 0.999526431 NA |
| ASV_16s_27571 | 0.067956391 | 0.345285779 | 3.551788137 | 0.476995441 | 0.999526431 NA |
| ASV_16s_27572 | 0.067956391 | 0.345285779 | 3.551788137 | 0.476995441 | 0.999526431 NA |
| ASV_16s_27573 | 0.067956391 | 0.345285779 | 3.551788137 | 0.476995441 | 0.999526431 NA |
| ASV_16s_27574 | 0.067956391 | 0.345285779 | 3.551788137 | 0.476995441 | 0.999526431 NA |
| ASV_16s_27575 | 0.067956391 | 0.345285779 | 3.551788137 | 0.476995441 | 0.999526431 NA |
| ASV_16s_27576 | 0.067956391 | 0.345285779 | 3.551788137 | 0.476995441 | 0.999526431 NA |
| ASV_16s_27577 | 0.088050728 | 0.315940569 | 3.551398564 | 0.529808811 | 0.999329848 NA |
| ASV_16s_27578 | 0.088050728 | 0.315940569 | 3.551398564 | 0.529808811 | 0.999329848 NA |
| ASV_16s_27579 | 0.088050728 | 0.315940569 | 3.551398564 | 0.529808811 | 0.999329848 NA |
| ASV_16s_27580 | 0.088050728 | 0.315940569 | 3.551398564 | 0.529808811 | 0.999329848 NA |
| ASV_16s_27581 | 0.088050728 | 0.315940569 | 3.551398564 | 0.529808811 | 0.999329848 NA |
| ASV_16s_27582 | 0.088050728 | 0.315940569 | 3.551398564 | 0.529808811 | 0.999329848 NA |
| ASV_16s_27583 | 0.088050728 | 0.315940569 | 3.551398564 | 0.529808811 | 0.999329848 NA |
| ASV_16s_27584 | 0.088050728 | 0.315940569 | 3.551398564 | 0.529808811 | 0.999329848 NA |
| ASV_16s_27585 | 0.090927341 | 0.315940588 | 3.551373281 | 0.543180578 | 0.999272509 NA |
| ASV_16s_27586 | 0.101833564 | 0.315940459 | 3.551290092 | 0.595290802 | 0.999017398 NA |
| ASV_16s_27587 | 0.076668807 | 0.315940806 | 3.551517289 | 0.478145744 | 0.999526333 NA |
| ASV_16s_27588 | 0.07611078  | 0.315940816 | 3.551523954 | 0.475730308 | 0.999530584 NA |
| ASV_16s_27589 | 0.07611078  | 0.315940816 | 3.551523954 | 0.475730308 | 0.999530584 NA |
| ASV_16s_27590 | 0.07611078  | 0.315940816 | 3.551523954 | 0.475730308 | 0.999530584 NA |
| ASV_16s_27591 | 0.07611078  | 0.315940816 | 3.551523954 | 0.475730308 | 0.999530584 NA |
| ASV_16s_27592 | 0.07611078  | 0.315940816 | 3.551523954 | 0.475730308 | 0.999530584 NA |
| ASV_16s_27593 | 0.07611078  | 0.315940816 | 3.551523954 | 0.475730308 | 0.999530584 NA |
| ASV_16s_27594 | 0.07611078  | 0.315940816 | 3.551523954 | 0.475730308 | 0.999530584 NA |
| ASV_16s_27595 | 0.07611078  | 0.315940816 | 3.551523954 | 0.475730308 | 0.999530584 NA |
| ASV_16s_27596 | 0.07611078  | 0.315940816 | 3.551523954 | 0.475730308 | 0.999530584 NA |
| ASV_16s_27597 | 0.07611078  | 0.315940816 | 3.551523954 | 0.475730308 | 0.999530584 NA |
| ASV_16s_27598 | 0.074057607 | 0.315940855 | 3.551549533 | 0.46675979  | 0.999559321 NA |
| ASV_16s_27599 | 0.073715411 | 0.315940861 | 3.551553932 | 0.465275972 | 0.999563956 NA |
| ASV_16s_27600 | 0.10414477  | 0.315940435 | 3.551274679 | 0.606542402 | 0.998955369 NA |
| ASV_16s_27601 | 0.118161765 | 0.315940213 | 3.551193799 | 0.67663958  | 0.998508859 NA |
| ASV_16s_27602 | 0.086705819 | 0.315940645 | 3.551411262 | 0.523257257 | 0.999356788 NA |
| ASV_16s_27603 | 0.09544736  | 0.577133238 | 3.551262597 | 0.624085961 | 0.998853486 NA |
| ASV_16s_27604 | 0.070977846 | 0.315940916 | 3.551590618 | 0.453526748 | 0.999599485 NA |
| ASV_16s_27605 | 0.070977846 | 0.315940916 | 3.551590618 | 0.453526748 | 0.999599485 NA |
| ASV_16s_27606 | 0.070977846 | 0.315940916 | 3.551590618 | 0.453526748 | 0.999599485 NA |
| ASV_16s_27607 | 0.070977846 | 0.315940916 | 3.551590618 | 0.453526748 | 0.999599485 NA |
| ASV_16s_27608 | 0.070977846 | 0.315940916 | 3.551590618 | 0.453526748 | 0.999599485 NA |
| ASV_16s_27609 | 0.070977846 | 0.315940916 | 3.551590618 | 0.453526748 | 0.999599485 NA |
| ASV_16s_27610 | 0.070977846 | 0.315940916 | 3.551590618 | 0.453526748 | 0.999599485 NA |
| ASV_16s_27611 | 0.070977846 | 0.315940916 | 3.551590618 | 0.453526748 | 0.999599485 NA |
| ASV_16s_27612 | 0.070977846 | 0.315940916 | 3.551590618 | 0.453526748 | 0.999599485 NA |
| ASV_16s_27613 | 0.070977846 | 0.315940916 | 3.551590618 | 0.453526748 | 0.999599485 NA |

|               |             |             |             |             |                |
|---------------|-------------|-------------|-------------|-------------|----------------|
| ASV_16s_27614 | 0.070977846 | 0.315940916 | 3.551590618 | 0.453526748 | 0.999599485 NA |
| ASV_16s_27615 | 0.070977846 | 0.315940916 | 3.551590618 | 0.453526748 | 0.999599485 NA |
| ASV_16s_27616 | 0.070977846 | 0.315940916 | 3.551590618 | 0.453526748 | 0.999599485 NA |
| ASV_16s_27617 | 0.070977846 | 0.315940916 | 3.551590618 | 0.453526748 | 0.999599485 NA |
| ASV_16s_27618 | 0.070977846 | 0.315940916 | 3.551590618 | 0.453526748 | 0.999599485 NA |
| ASV_16s_27619 | 0.070977846 | 0.315940916 | 3.551590618 | 0.453526748 | 0.999599485 NA |
| ASV_16s_27620 | 0.070977846 | 0.315940916 | 3.551590618 | 0.453526748 | 0.999599485 NA |
| ASV_16s_27621 | 0.070977846 | 0.315940916 | 3.551590618 | 0.453526748 | 0.999599485 NA |
| ASV_16s_27622 | 0.070977846 | 0.315940916 | 3.551590618 | 0.453526748 | 0.999599485 NA |
| ASV_16s_27623 | 0.070977846 | 0.315940916 | 3.551590618 | 0.453526748 | 0.999599485 NA |
| ASV_16s_27624 | 0.070977846 | 0.315940916 | 3.551590618 | 0.453526748 | 0.999599485 NA |
| ASV_16s_27625 | 0.070977846 | 0.315940916 | 3.551590618 | 0.453526748 | 0.999599485 NA |
| ASV_16s_27626 | 0.070977846 | 0.315940916 | 3.551590618 | 0.453526748 | 0.999599485 NA |
| ASV_16s_27627 | 0.070977846 | 0.315940916 | 3.551590618 | 0.453526748 | 0.999599485 NA |
| ASV_16s_27628 | 0.070977846 | 0.315940916 | 3.551590618 | 0.453526748 | 0.999599485 NA |
| ASV_16s_27629 | 0.070977846 | 0.315940916 | 3.551590618 | 0.453526748 | 0.999599485 NA |
| ASV_16s_27630 | 0.070977846 | 0.315940916 | 3.551590618 | 0.453526748 | 0.999599485 NA |
| ASV_16s_27631 | 0.070977846 | 0.315940916 | 3.551590618 | 0.453526748 | 0.999599485 NA |
| ASV_16s_27632 | 0.070977846 | 0.315940916 | 3.551590618 | 0.453526748 | 0.999599485 NA |
| ASV_16s_27633 | 0.070977846 | 0.315940916 | 3.551590618 | 0.453526748 | 0.999599485 NA |
| ASV_16s_27634 | 0.070977846 | 0.315940916 | 3.551590618 | 0.453526748 | 0.999599485 NA |
| ASV_16s_27635 | 0.070977846 | 0.315940916 | 3.551590618 | 0.453526748 | 0.999599485 NA |
| ASV_16s_27636 | 0.070977846 | 0.315940916 | 3.551590618 | 0.453526748 | 0.999599485 NA |
| ASV_16s_27637 | 0.100213606 | 0.315940476 | 3.551301564 | 0.587006634 | 0.999061448 NA |
| ASV_16s_27638 | 0.133625903 | 0.315940097 | 3.551124199 | 0.755910091 | 0.997868306 NA |
| ASV_16s_27639 | 0.095568199 | 0.595722931 | 3.550837959 | 0.343993989 | 0.999841224 NA |
| ASV_16s_27640 | 0.095568199 | 0.595722931 | 3.550837959 | 0.343993989 | 0.999841224 NA |
| ASV_16s_27641 | 0.095568199 | 0.595722931 | 3.550837959 | 0.343993989 | 0.999841224 NA |
| ASV_16s_27642 | 0.067594831 | 0.685842694 | 3.551529679 | 0.383039674 | 0.999772142 NA |
| ASV_16s_27643 | 0.067594831 | 0.685842694 | 3.551529679 | 0.383039674 | 0.999772142 NA |
| ASV_16s_27644 | 0.067594831 | 0.685842694 | 3.551529679 | 0.383039674 | 0.999772142 NA |
| ASV_16s_27645 | 0.067594831 | 0.685842694 | 3.551529679 | 0.383039674 | 0.999772142 NA |
| ASV_16s_27646 | 0.067594831 | 0.685842694 | 3.551529679 | 0.383039674 | 0.999772142 NA |
| ASV_16s_27647 | 0.067594831 | 0.685842694 | 3.551529679 | 0.383039674 | 0.999772142 NA |
| ASV_16s_27648 | 0.076464402 | 0.903755198 | 3.551797087 | 0.293682145 | 0.999906917 NA |
| ASV_16s_27649 | 0.12211479  | 0.687186683 | 3.551097953 | 0.597850602 | 0.99900351 NA  |
| ASV_16s_27650 | 0.12211479  | 0.687186683 | 3.551097953 | 0.597850602 | 0.99900351 NA  |
| ASV_16s_27651 | 0.12211479  | 0.687186683 | 3.551097953 | 0.597850602 | 0.99900351 NA  |
| ASV_16s_27652 | 0.10894554  | 0.968247355 | 3.551524902 | 0.420135999 | 0.999689571 NA |
| ASV_16s_27653 | 0.101420254 | 0.844081183 | 3.551735461 | 0.404853792 | 0.999725716 NA |
| ASV_16s_27654 | 0.150236949 | 0.73265045  | 3.551289349 | 0.787628522 | 0.997568168 NA |
| ASV_16s_27655 | 0.150236949 | 0.73265045  | 3.551289349 | 0.787628522 | 0.997568168 NA |
| ASV_16s_27656 | 0.144977427 | 0.731777682 | 3.551313197 | 0.763769548 | 0.997796358 NA |
| ASV_16s_27657 | 0.102681487 | 0.92915965  | 3.551671938 | 0.420751819 | 0.99968805 NA  |
| ASV_16s_27658 | 0.110959324 | 0.718478571 | 3.551486352 | 0.614010093 | 0.998912779 NA |
| ASV_16s_27659 | 0.110959324 | 0.718478571 | 3.551486352 | 0.614010093 | 0.998912779 NA |
| ASV_16s_27660 | 0.110959324 | 0.718478571 | 3.551486352 | 0.614010093 | 0.998912779 NA |
| ASV_16s_27661 | 0.110959324 | 0.718478571 | 3.551486352 | 0.614010093 | 0.998912779 NA |
| ASV_16s_27662 | 0.110959324 | 0.718478571 | 3.551486352 | 0.614010093 | 0.998912779 NA |
| ASV_16s_27663 | 0.110959324 | 0.718478571 | 3.551486352 | 0.614010093 | 0.998912779 NA |
| ASV_16s_27664 | 0.110959324 | 0.718478571 | 3.551486352 | 0.614010093 | 0.998912779 NA |
| ASV_16s_27665 | 0.110959324 | 0.718478571 | 3.551486352 | 0.614010093 | 0.998912779 NA |
| ASV_16s_27666 | 0.110959324 | 0.718478571 | 3.551486352 | 0.614010093 | 0.998912779 NA |
| ASV_16s_27667 | 0.110959324 | 0.718478571 | 3.551486352 | 0.614010093 | 0.998912779 NA |
| ASV_16s_27668 | 0.110959324 | 0.718478571 | 3.551486352 | 0.614010093 | 0.998912779 NA |
| ASV_16s_27669 | 0.110959324 | 0.718478571 | 3.551486352 | 0.614010093 | 0.998912779 NA |
| ASV_16s_27670 | 0.110959324 | 0.718478571 | 3.551486352 | 0.614010093 | 0.998912779 NA |
| ASV_16s_27671 | 0.110959324 | 0.718478571 | 3.551486352 | 0.614010093 | 0.998912779 NA |
| ASV_16s_27672 | 0.110959324 | 0.718478571 | 3.551486352 | 0.614010093 | 0.998912779 NA |
| ASV_16s_27673 | 0.110959324 | 0.718478571 | 3.551486352 | 0.614010093 | 0.998912779 NA |
| ASV_16s_27674 | 0.110959324 | 0.718478571 | 3.551486352 | 0.614010093 | 0.998912779 NA |
| ASV_16s_27675 | 0.110959324 | 0.718478571 | 3.551486352 | 0.614010093 | 0.998912779 NA |
| ASV_16s_27676 | 0.110959324 | 0.718478571 | 3.551486352 | 0.614010093 | 0.998912779 NA |
| ASV_16s_27677 | 0.102995958 | 0.711132646 | 3.551524282 | 0.580267196 | 0.999096288 NA |
| ASV_16s_27678 | 0.099583087 | 0.707813149 | 3.551542167 | 0.566058249 | 0.999166861 NA |
| ASV_16s_27679 | 0.093894968 | 0.702027803 | 3.551574501 | 0.542751429 | 0.999274399 NA |
| ASV_16s_27680 | 0.093894968 | 0.702027803 | 3.551574501 | 0.542751429 | 0.999274399 NA |







|               |             |              |             |             |             |    |
|---------------|-------------|--------------|-------------|-------------|-------------|----|
| ASV_16s_27882 | 0.057114702 | 0.307322688  | 3.551969444 | 0.271050676 | 0.999929079 | NA |
| ASV_16s_27883 | 0.057114702 | 0.307322688  | 3.551969444 | 0.271050676 | 0.999929079 | NA |
| ASV_16s_27884 | 0.057131814 | 0.162820202  | 3.551924159 | 0.309812977 | 0.999888458 | NA |
| ASV_16s_27885 | 0.057137518 | 0.121331366  | 3.551907709 | 0.319086245 | 0.999876771 | NA |
| ASV_16s_27886 | 0.057137518 | 0.121331366  | 3.551907709 | 0.319086245 | 0.999876771 | NA |
| ASV_16s_27887 | 0.058150377 | 0.11206074   | 3.551901674 | 0.323087797 | 0.999871476 | NA |
| ASV_16s_27888 | 0.058150377 | 0.11206074   | 3.551901674 | 0.323087797 | 0.999871476 | NA |
| ASV_16s_27889 | 0.057137518 | 0.121331366  | 3.551907709 | 0.319086245 | 0.999876771 | NA |
| ASV_16s_27890 | 0.058150377 | 0.11206074   | 3.551901674 | 0.323087797 | 0.999871476 | NA |
| ASV_16s_27891 | 0.058409296 | 0.071030941  | 3.551880992 | 0.331171481 | 0.999860301 | NA |
| ASV_16s_27892 | 0.057143222 | 0.081825581  | 3.551889015 | 0.326136833 | 0.999867337 | NA |
| ASV_16s_27893 | 0.058409296 | 0.071030941  | 3.551880992 | 0.331171481 | 0.999860301 | NA |
| ASV_16s_27894 | 0.058409296 | 0.071030941  | 3.551880992 | 0.331171481 | 0.999860301 | NA |
| ASV_16s_27895 | 0.058668215 | 0.032281019  | 3.551862895 | 0.336592631 | 0.999852442 | NA |
| ASV_16s_27896 | 0.057148926 | 0.044260208  | 3.551871603 | 0.330617315 | 0.999861088 | NA |
| ASV_16s_27897 | 0.058668215 | 0.032281019  | 3.551862895 | 0.336592631 | 0.999852442 | NA |
| ASV_16s_27898 | 0.057148926 | 0.044260208  | 3.551871603 | 0.330617315 | 0.999861088 | NA |
| ASV_16s_27899 | 0.058927134 | -0.004657224 | 3.551846938 | 0.339471418 | 0.999848146 | NA |
| ASV_16s_27900 | 0.058927134 | -0.004657224 | 3.551846938 | 0.339471418 | 0.999848146 | NA |
| ASV_16s_27901 | 0.072114896 | -0.043733913 | 3.551818674 | 0.398410101 | 0.999740048 | NA |
| ASV_16s_27902 | 0.072114896 | -0.043733913 | 3.551818674 | 0.398410101 | 0.999740048 | NA |
| ASV_16s_27903 | 0.058927134 | -0.004657224 | 3.551846938 | 0.339471418 | 0.999848146 | NA |
| ASV_16s_27904 | 0.058927134 | -0.004657224 | 3.551846938 | 0.339471418 | 0.999848146 | NA |
| ASV_16s_27905 | 0.067968561 | -0.043733913 | 3.551818674 | 0.378944206 | 0.999780208 | NA |
| ASV_16s_27906 | 0.05715463  | 0.008339555  | 3.551856211 | 0.332603249 | 0.999858254 | NA |
| ASV_16s_27907 | 0.067968561 | -0.043733913 | 3.551818674 | 0.378944206 | 0.999780208 | NA |
| ASV_16s_27908 | 0.05715463  | 0.008339555  | 3.551856211 | 0.332603249 | 0.999858254 | NA |
| ASV_16s_27909 | 0.059186053 | -0.040169102 | 3.551832794 | 0.339912704 | 0.99984748  | NA |
| ASV_16s_27910 | 0.059186053 | -0.040169102 | 3.551832794 | 0.339912704 | 0.99984748  | NA |
| ASV_16s_27911 | 0.074257781 | -0.096506652 | 3.551786085 | 0.405252945 | 0.999724811 | NA |
| ASV_16s_27912 | 0.059186053 | -0.040169102 | 3.551832794 | 0.339912704 | 0.99984748  | NA |
| ASV_16s_27913 | 0.069519112 | -0.096506652 | 3.551786085 | 0.38341688  | 0.999771389 | NA |
| ASV_16s_27914 | 0.059444972 | -0.074597119 | 3.551820208 | 0.337789656 | 0.999850666 | NA |
| ASV_16s_27915 | 0.057166039 | -0.059937095 | 3.551830401 | 0.329460288 | 0.999862721 | NA |
| ASV_16s_27916 | 0.058432113 | -0.068150468 | 3.551824664 | 0.33404182  | 0.999856177 | NA |
| ASV_16s_27917 | 0.057925683 | -0.064886164 | 3.551826936 | 0.332195199 | 0.99985884  | NA |
| ASV_16s_27918 | 0.069176045 | -0.187308735 | 3.551744799 | 0.359306575 | 0.99981617  | NA |
| ASV_16s_27919 | 0.020417818 | 0.025350055  | 3.551936793 | 0.140344601 | 0.999992548 | NA |
| ASV_16s_27920 | 0.020417818 | 0.025350055  | 3.551936793 | 0.140344601 | 0.999992548 | NA |
| ASV_16s_27921 | 0.09689091  | -0.399000329 | 3.55147134  | 0.414968503 | 0.999702137 | NA |
| ASV_16s_27922 | 0.09689091  | -0.399000329 | 3.55147134  | 0.414968503 | 0.999702137 | NA |
| ASV_16s_27923 | 0.089806344 | -0.373298618 | 3.551535503 | 0.387639508 | 0.999762841 | NA |
| ASV_16s_27924 | 0.077922457 | -0.324827424 | 3.55162671  | 0.34461368  | 0.999840259 | NA |
| ASV_16s_27925 | 0.077922457 | -0.324827424 | 3.55162671  | 0.34461368  | 0.999840259 | NA |
| ASV_16s_27926 | 0.077922457 | -0.324827424 | 3.55162671  | 0.34461368  | 0.999840259 | NA |
| ASV_16s_27927 | 0.077922457 | -0.324827424 | 3.55162671  | 0.34461368  | 0.999840259 | NA |
| ASV_16s_27928 | 0.077922457 | -0.324827424 | 3.55162671  | 0.34461368  | 0.999840259 | NA |
| ASV_16s_27929 | 0.077922457 | -0.324827424 | 3.55162671  | 0.34461368  | 0.999840259 | NA |
| ASV_16s_27930 | 0.077922457 | -0.324827424 | 3.55162671  | 0.34461368  | 0.999840259 | NA |
| ASV_16s_27931 | 0.077922457 | -0.324827424 | 3.55162671  | 0.34461368  | 0.999840259 | NA |
| ASV_16s_27932 | 0.077922457 | -0.324827424 | 3.55162671  | 0.34461368  | 0.999840259 | NA |
| ASV_16s_27933 | 0.077922457 | -0.324827424 | 3.55162671  | 0.34461368  | 0.999840259 | NA |
| ASV_16s_27934 | 0.077922457 | -0.324827424 | 3.55162671  | 0.34461368  | 0.999840259 | NA |
| ASV_16s_27935 | 0.077922457 | -0.324827424 | 3.55162671  | 0.34461368  | 0.999840259 | NA |
| ASV_16s_27936 | 0.077922457 | -0.324827424 | 3.55162671  | 0.34461368  | 0.999840259 | NA |
| ASV_16s_27937 | 0.077922457 | -0.324827424 | 3.55162671  | 0.34461368  | 0.999840259 | NA |
| ASV_16s_27938 | 0.079141356 | -0.330150041 | 3.55161704  | 0.348837182 | 0.999833573 | NA |
| ASV_16s_27939 | 0.074213293 | -0.308291721 | 3.551656076 | 0.332073717 | 0.999859014 | NA |
| ASV_16s_27940 | 0.073749647 | -0.306214057 | 3.551659438 | 0.330542166 | 0.999861194 | NA |
| ASV_16s_27941 | 0.080360255 | -0.335404351 | 3.551607579 | 0.353112897 | 0.99982661  | NA |
| ASV_16s_27942 | 0.080360255 | -0.335404351 | 3.551607579 | 0.353112897 | 0.99982661  | NA |
| ASV_16s_27943 | 0.080360255 | -0.335404351 | 3.551607579 | 0.353112897 | 0.99982661  | NA |
| ASV_16s_27944 | 0.080360255 | -0.335404351 | 3.551607579 | 0.353112897 | 0.99982661  | NA |
| ASV_16s_27945 | 0.080360255 | -0.335404351 | 3.551607579 | 0.353112897 | 0.99982661  | NA |
| ASV_16s_27946 | 0.080360255 | -0.335404351 | 3.551607579 | 0.353112897 | 0.99982661  | NA |
| ASV_16s_27947 | 0.080360255 | -0.335404351 | 3.551607579 | 0.353112897 | 0.99982661  | NA |
| ASV_16s_27948 | 0.080360255 | -0.335404351 | 3.551607579 | 0.353112897 | 0.99982661  | NA |



|               |             |              |             |             |             |    |
|---------------|-------------|--------------|-------------|-------------|-------------|----|
| ASV_16s_28016 | 0.058713848 | -0.233853827 | 3.551763245 | 0.285622654 | 0.999915292 | NA |
| ASV_16s_28017 | 0.058207418 | -0.231280736 | 3.551765827 | 0.284285225 | 0.999916629 | NA |
| ASV_16s_28018 | 0.057194559 | -0.226082593 | 3.551771076 | 0.281653088 | 0.999919217 | NA |
| ASV_16s_28019 | 0.057194559 | -0.226082593 | 3.551771076 | 0.281653088 | 0.999919217 | NA |
| ASV_16s_28020 | 0.057194559 | -0.226082593 | 3.551771076 | 0.281653088 | 0.999919217 | NA |
| ASV_16s_28021 | 0.057194559 | -0.226082593 | 3.551771076 | 0.281653088 | 0.999919217 | NA |
| ASV_16s_28022 | 0.057194559 | -0.226082593 | 3.551771076 | 0.281653088 | 0.999919217 | NA |
| ASV_16s_28023 | 0.057194559 | -0.226082593 | 3.551771076 | 0.281653088 | 0.999919217 | NA |
| ASV_16s_28024 | 0.057194559 | -0.226082593 | 3.551771076 | 0.281653088 | 0.999919217 | NA |
| ASV_16s_28025 | 0.057194559 | -0.226082593 | 3.551771076 | 0.281653088 | 0.999919217 | NA |
| ASV_16s_28026 | 0.057194559 | -0.226082593 | 3.551771076 | 0.281653088 | 0.999919217 | NA |
| ASV_16s_28027 | 0.057194559 | -0.226082593 | 3.551771076 | 0.281653088 | 0.999919217 | NA |
| ASV_16s_28028 | 0.057194559 | -0.226082593 | 3.551771076 | 0.281653088 | 0.999919217 | NA |
| ASV_16s_28029 | 0.057194559 | -0.226082593 | 3.551771076 | 0.281653088 | 0.999919217 | NA |
| ASV_16s_28030 | 0.057194559 | -0.226082593 | 3.551771076 | 0.281653088 | 0.999919217 | NA |
| ASV_16s_28031 | 0.057194559 | -0.226082593 | 3.551771076 | 0.281653088 | 0.999919217 | NA |
| ASV_16s_28032 | 0.057194559 | -0.226082593 | 3.551771076 | 0.281653088 | 0.999919217 | NA |
| ASV_16s_28033 | 0.057194559 | -0.226082593 | 3.551771076 | 0.281653088 | 0.999919217 | NA |
| ASV_16s_28034 | 0.057194559 | -0.226082593 | 3.551771076 | 0.281653088 | 0.999919217 | NA |
| ASV_16s_28035 | 0.057194559 | -0.226082593 | 3.551771076 | 0.281653088 | 0.999919217 | NA |
| ASV_16s_28036 | 0.057194559 | -0.226082593 | 3.551771076 | 0.281653088 | 0.999919217 | NA |
| ASV_16s_28037 | 0.057194559 | -0.226082593 | 3.551771076 | 0.281653088 | 0.999919217 | NA |
| ASV_16s_28038 | 0.057194559 | -0.226082593 | 3.551771076 | 0.281653088 | 0.999919217 | NA |
| ASV_16s_28039 | 0.057194559 | -0.226082593 | 3.551771076 | 0.281653088 | 0.999919217 | NA |
| ASV_16s_28040 | 0.057194559 | -0.226082593 | 3.551771076 | 0.281653088 | 0.999919217 | NA |
| ASV_16s_28041 | 0.057194559 | -0.226082593 | 3.551771076 | 0.281653088 | 0.999919217 | NA |
| ASV_16s_28042 | 0.057194559 | -0.226082593 | 3.551771076 | 0.281653088 | 0.999919217 | NA |
| ASV_16s_28043 | 0.057194559 | -0.226082593 | 3.551771076 | 0.281653088 | 0.999919217 | NA |
| ASV_16s_28044 | 0.057194559 | -0.226082593 | 3.551771076 | 0.281653088 | 0.999919217 | NA |
| ASV_16s_28045 | 0.057194559 | -0.226082593 | 3.551771076 | 0.281653088 | 0.999919217 | NA |
| ASV_16s_28046 | 0.057194559 | -0.226082593 | 3.551771076 | 0.281653088 | 0.999919217 | NA |
| ASV_16s_28047 | 0.057194559 | -0.226082593 | 3.551771076 | 0.281653088 | 0.999919217 | NA |
| ASV_16s_28048 | 0.057194559 | -0.226082593 | 3.551771076 | 0.281653088 | 0.999919217 | NA |
| ASV_16s_28049 | 0.057194559 | -0.226082593 | 3.551771076 | 0.281653088 | 0.999919217 | NA |
| ASV_16s_28050 | 0.057194559 | -0.226082593 | 3.551771076 | 0.281653088 | 0.999919217 | NA |
| ASV_16s_28051 | 0.057194559 | -0.226082593 | 3.551771076 | 0.281653088 | 0.999919217 | NA |
| ASV_16s_28052 | 0.057194559 | -0.226082593 | 3.551771076 | 0.281653088 | 0.999919217 | NA |
| ASV_16s_28053 | 0.057194559 | -0.226082593 | 3.551771076 | 0.281653088 | 0.999919217 | NA |
| ASV_16s_28054 | 0.057194559 | -0.226082593 | 3.551771076 | 0.281653088 | 0.999919217 | NA |
| ASV_16s_28055 | 0.057194559 | -0.226082593 | 3.551771076 | 0.281653088 | 0.999919217 | NA |
| ASV_16s_28056 | 0.057194559 | -0.226082593 | 3.551771076 | 0.281653088 | 0.999919217 | NA |
| ASV_16s_28057 | 0.057194559 | -0.226082593 | 3.551771076 | 0.281653088 | 0.999919217 | NA |
| ASV_16s_28058 | 0.057194559 | -0.226082593 | 3.551771076 | 0.281653088 | 0.999919217 | NA |
| ASV_16s_28059 | 0.057194559 | -0.226082593 | 3.551771076 | 0.281653088 | 0.999919217 | NA |
| ASV_16s_28060 | 0.057194559 | -0.226082593 | 3.551771076 | 0.281653088 | 0.999919217 | NA |
| ASV_16s_28061 | 0.057194559 | -0.226082593 | 3.551771076 | 0.281653088 | 0.999919217 | NA |
| ASV_16s_28062 | 0.057194559 | -0.226082593 | 3.551771076 | 0.281653088 | 0.999919217 | NA |
| ASV_16s_28063 | 0.057194559 | -0.226082593 | 3.551771076 | 0.281653088 | 0.999919217 | NA |
| ASV_16s_28064 | 0.08711509  | -0.363003012 | 3.55155696  | 0.377611336 | 0.999782791 | NA |
| ASV_16s_28065 | 0.08711509  | -0.363003012 | 3.55155696  | 0.377611336 | 0.999782791 | NA |
| ASV_16s_28066 | 0.08711509  | -0.363003012 | 3.55155696  | 0.377611336 | 0.999782791 | NA |
| ASV_16s_28067 | 0.018222552 | -0.08931258  | 3.551477775 | 0.031321224 | 0.999999959 | NA |
| ASV_16s_28068 | 0.017253027 | 0.040313663  | 3.551517868 | 0.038859879 | 0.999999913 | NA |
| ASV_16s_28069 | 0.037021534 | 0.229017803  | 3.551268723 | 0.136624753 | 0.999993207 | NA |
| ASV_16s_28070 | 0.019214109 | 0.25033859   | 3.551624645 | 0.024719853 | 0.999999982 | NA |
| ASV_16s_28071 | 0.02142438  | 0.244836881  | 3.551579148 | 0.038380033 | 0.999999917 | NA |
| ASV_16s_28072 | 0.025402867 | 0.23740598   | 3.551490152 | 0.063423649 | 0.999999524 | NA |
| ASV_16s_28073 | 0.025402867 | 0.23740598   | 3.551490152 | 0.063423649 | 0.999999524 | NA |
| ASV_16s_28079 | 0.089196986 | 0.595671529  | 3.550858544 | 0.313485833 | 0.999883925 | NA |
| ASV_16s_28080 | 0.080360255 | 0.68631853   | 3.551377048 | 0.421169752 | 0.999687014 | NA |
| ASV_16s_28081 | 0.080360255 | 0.68631853   | 3.551377048 | 0.421169752 | 0.999687014 | NA |
| ASV_16s_28082 | 0.080360255 | 0.68631853   | 3.551377048 | 0.421169752 | 0.999687014 | NA |
| ASV_16s_28083 | 0.080360255 | 0.68631853   | 3.551377048 | 0.421169752 | 0.999687014 | NA |
| ASV_16s_28084 | 0.080360255 | 0.68631853   | 3.551377048 | 0.421169752 | 0.999687014 | NA |
| ASV_16s_28085 | 0.060970259 | 0.049944984  | 3.551868478 | 0.284006275 | 0.999916906 | NA |
| ASV_16s_28086 | 0.058631919 | 0.448032135  | 3.551993445 | 0.223053129 | 0.999963475 | NA |
| ASV_16s_28087 | 0.066502938 | -0.036610677 | 3.551796705 | 0.286597938 | 0.999914307 | NA |



|               |             |              |             |             |                |
|---------------|-------------|--------------|-------------|-------------|----------------|
| ASV_16s_28088 | 0.0642063   | 0.130890631  | 3.551905861 | 0.294242245 | 0.999906315 NA |
| ASV_16s_28089 | 0.069321553 | 0.49910954   | 3.551971156 | 0.186951416 | 0.999980034 NA |
| ASV_16s_28090 | 0.073540122 | -0.173466633 | 3.551845935 | 0.27619728  | 0.999924403 NA |
| ASV_16s_28091 | 0.071529501 | -0.173466633 | 3.551845935 | 0.266095716 | 0.999933386 NA |
| ASV_16s_28092 | 0.061295405 | -0.137694898 | 3.551875695 | 0.236626297 | 0.999955321 NA |
| ASV_16s_28093 | 0.070442409 | 0.051201601  | 3.551806329 | 0.308538819 | 0.999890001 NA |
| ASV_16s_28094 | 0.063451451 | 0.540540359  | 3.552001617 | 0.233509134 | 0.999957296 NA |
| ASV_16s_28095 | 0.07430531  | 0.204954075  | 3.551920196 | 0.288838768 | 0.999912016 NA |
| ASV_16s_28096 | 0.075726831 | -0.120227145 | 3.551877658 | 0.286047159 | 0.999914864 NA |
| ASV_16s_28097 | 0.07721285  | -0.120227145 | 3.551877658 | 0.290807854 | 0.999909967 NA |
| ASV_16s_28098 | 0.093504325 | -0.111052934 | 3.551804836 | 0.420933523 | 0.9996876 NA   |
| ASV_16s_28099 | 0.071986724 | -0.120227145 | 3.551877658 | 0.273995222 | 0.999926429 NA |
| ASV_16s_28100 | 0.088787111 | 0.612600562  | 3.551858291 | 0.402363745 | 0.999731317 NA |
| ASV_16s_28101 | 0.067553733 | 0.590231332  | 3.55198708  | 0.274743586 | 0.999925745 NA |
| ASV_16s_28102 | 0.071348955 | -0.074234721 | 3.551871048 | 0.279101938 | 0.999921672 NA |
| ASV_16s_28103 | 0.069625083 | 0.193478704  | 3.551811297 | 0.287553535 | 0.999913335 NA |
| ASV_16s_28104 | 0.064764433 | 0.197796428  | 3.551856638 | 0.250918843 | 0.999945443 NA |
| ASV_16s_28105 | 0.084182307 | 0.620063416  | 3.551913902 | 0.317547362 | 0.999878766 NA |
| ASV_16s_28106 | 0.076434939 | -0.007083911 | 3.551880612 | 0.302156105 | 0.999897509 NA |
| ASV_16s_28107 | 0.074848581 | -0.033391109 | 3.551831407 | 0.304021209 | 0.999895353 NA |
| ASV_16s_28108 | 0.07606748  | -0.033391109 | 3.551831407 | 0.307346665 | 0.999891431 NA |
| ASV_16s_28109 | 0.071508734 | 0.26347752   | 3.551845535 | 0.276634257 | 0.999923997 NA |
| ASV_16s_28110 | 0.061720274 | 0.243063648  | 3.551847633 | 0.270678328 | 0.999929409 NA |
| ASV_16s_28111 | 0.077287124 | 0.018605985  | 3.551854611 | 0.313140335 | 0.999884357 NA |
| ASV_16s_28112 | 0.07510178  | 0.010936575  | 3.551758607 | 0.318979697 | 0.99987691 NA  |
| ASV_16s_28113 | 0.073183673 | 0.013525971  | 3.55178874  | 0.310265351 | 0.999887906 NA |
| ASV_16s_28114 | 0.075454226 | 0.011857559  | 3.551769197 | 0.31838744  | 0.99987768 NA  |
| ASV_16s_28115 | 0.072319906 | 0.010936575  | 3.551758607 | 0.312075016 | 0.999885681 NA |
| ASV_16s_28116 | 0.085978643 | 0.761524713  | 3.551839074 | 0.212550057 | 0.999969023 NA |
| ASV_16s_28117 | 0.062984815 | 0.624066472  | 3.551903585 | 0.293530171 | 0.99990708 NA  |
| ASV_16s_28118 | 0.081523642 | 0.058236044  | 3.551699218 | 0.34725099  | 0.999836106 NA |
| ASV_16s_28119 | 0.080598732 | 0.058857436  | 3.551715844 | 0.342947172 | 0.999842845 NA |
| ASV_16s_28120 | 0.074840973 | 0.058730749  | 3.551713469 | 0.330716351 | 0.999860948 NA |
| ASV_16s_28121 | 0.068932846 | 0.065069523  | 3.551812086 | 0.304447033 | 0.999894856 NA |
| ASV_16s_28122 | 0.074694926 | 0.058857436  | 3.551715844 | 0.330038211 | 0.999861907 NA |
| ASV_16s_28123 | 0.076933573 | 0.131378785  | 3.551726906 | 0.217092495 | 0.999966702 NA |
| ASV_16s_28124 | 0.081687798 | 0.617901229  | 3.551698936 | 0.203350856 | 0.999973372 NA |
| ASV_16s_28125 | 0.079587875 | 0.262766653  | 3.551904911 | 0.280233907 | 0.999920589 NA |
| ASV_16s_28126 | 0.072534142 | 0.617901229  | 3.551698936 | 0.182396299 | 0.999981653 NA |
| ASV_16s_28127 | 0.075548762 | 0.455755377  | 3.551604502 | 0.356709711 | 0.999820598 NA |
| ASV_16s_28128 | 0.09192939  | 0.439961376  | 3.551908067 | 0.435479603 | 0.999650122 NA |
| ASV_16s_28129 | 0.075658221 | 0.208813476  | 3.551554042 | 0.382751818 | 0.999772715 NA |
| ASV_16s_28130 | 0.071725664 | 0.208918342  | 3.551557716 | 0.377313116 | 0.999783365 NA |
| ASV_16s_28131 | 0.069524703 | 0.015679357  | 3.55137778  | 0.21873383  | 0.999965834 NA |
| ASV_16s_28132 | 0.075029861 | 0.839047798  | 3.551830991 | 0.29679958  | 0.999903529 NA |
| ASV_16s_28133 | 0.075029861 | 0.839047798  | 3.551830991 | 0.29679958  | 0.999903529 NA |
| ASV_16s_28134 | 0.075029861 | 0.839047798  | 3.551830991 | 0.29679958  | 0.999903529 NA |
| ASV_16s_28135 | 0.075029861 | 0.839047798  | 3.551830991 | 0.29679958  | 0.999903529 NA |
| ASV_16s_28136 | 0.075029861 | 0.839047798  | 3.551830991 | 0.29679958  | 0.999903529 NA |
| ASV_16s_28137 | 0.075029861 | 0.839047798  | 3.551830991 | 0.29679958  | 0.999903529 NA |
| ASV_16s_28138 | 0.075029861 | 0.839047798  | 3.551830991 | 0.29679958  | 0.999903529 NA |
| ASV_16s_28139 | 0.075029861 | 0.839047798  | 3.551830991 | 0.29679958  | 0.999903529 NA |
| ASV_16s_28140 | 0.075029861 | 0.839047798  | 3.551830991 | 0.29679958  | 0.999903529 NA |
| ASV_16s_28141 | 0.075029861 | 0.839047798  | 3.551830991 | 0.29679958  | 0.999903529 NA |
| ASV_16s_28142 | 0.075029861 | 0.839047798  | 3.551830991 | 0.29679958  | 0.999903529 NA |
| ASV_16s_28143 | 0.075029861 | 0.839047798  | 3.551830991 | 0.29679958  | 0.999903529 NA |
| ASV_16s_28144 | 0.096832461 | 0.299216918  | 3.551934965 | 0.399568428 | 0.999737511 NA |
| ASV_16s_28145 | 0.096832461 | 0.299216918  | 3.551934965 | 0.399568428 | 0.999737511 NA |
| ASV_16s_28146 | 0.096832461 | 0.299216918  | 3.551934965 | 0.399568428 | 0.999737511 NA |
| ASV_16s_28147 | 0.128478099 | 0.296646493  | 3.551888737 | 0.526085039 | 0.999345252 NA |
| ASV_16s_28148 | 0.079498224 | 0.897648892  | 3.551745702 | 0.309727413 | 0.999888562 NA |
| ASV_16s_28149 | 0.079498224 | 0.897648892  | 3.551745702 | 0.309727413 | 0.999888562 NA |
| ASV_16s_28150 | 0.079498224 | 0.897648892  | 3.551745702 | 0.309727413 | 0.999888562 NA |
| ASV_16s_28151 | 0.071563676 | 1.011495878  | 3.55180161  | 0.148021723 | 0.999991048 NA |
| ASV_16s_28152 | 0.063319979 | 0.828519588  | 3.551862527 | 0.270299677 | 0.999929744 NA |
| ASV_16s_28153 | 0.063319979 | 0.828519588  | 3.551862527 | 0.270299677 | 0.999929744 NA |
| ASV_16s_28154 | 0.063319979 | 0.828519588  | 3.551862527 | 0.270299677 | 0.999929744 NA |

|               |             |              |             |             |             |    |
|---------------|-------------|--------------|-------------|-------------|-------------|----|
| ASV_16s_28155 | 0.063319979 | 0.828519588  | 3.551862527 | 0.270299677 | 0.999929744 | NA |
| ASV_16s_28156 | 0.063319979 | 0.828519588  | 3.551862527 | 0.270299677 | 0.999929744 | NA |
| ASV_16s_28157 | 0.063319979 | 0.828519588  | 3.551862527 | 0.270299677 | 0.999929744 | NA |
| ASV_16s_28158 | 0.063319979 | 0.828519588  | 3.551862527 | 0.270299677 | 0.999929744 | NA |
| ASV_16s_28159 | 0.063319979 | 0.828519588  | 3.551862527 | 0.270299677 | 0.999929744 | NA |
| ASV_16s_28160 | 0.067622483 | 0.847550263  | 3.551835542 | 0.279839296 | 0.999920968 | NA |
| ASV_16s_28161 | 0.071249251 | 0.863019017  | 3.551812607 | 0.288451503 | 0.999912415 | NA |
| ASV_16s_28162 | 0.071249251 | 0.863019017  | 3.551812607 | 0.288451503 | 0.999912415 | NA |
| ASV_16s_28163 | 0.071249251 | 0.863019017  | 3.551812607 | 0.288451503 | 0.999912415 | NA |
| ASV_16s_28164 | 0.071249251 | 0.863019017  | 3.551812607 | 0.288451503 | 0.999912415 | NA |
| ASV_16s_28165 | 0.071249251 | 0.863019017  | 3.551812607 | 0.288451503 | 0.999912415 | NA |
| ASV_16s_28166 | 0.065371097 | 0.837610764  | 3.551850614 | 0.274756877 | 0.999925733 | NA |
| ASV_16s_28167 | 0.065371097 | 0.837610764  | 3.551850614 | 0.274756877 | 0.999925733 | NA |
| ASV_16s_28168 | 0.065371097 | 0.837610764  | 3.551850614 | 0.274756877 | 0.999925733 | NA |
| ASV_16s_28169 | 0.103295938 | 0.987337926  | 3.551549978 | 0.381627275 | 0.999774946 | NA |
| ASV_16s_28170 | 0.103295938 | 0.987337926  | 3.551549978 | 0.381627275 | 0.999774946 | NA |
| ASV_16s_28171 | 0.083804055 | 1.015337175  | 3.55178162  | 0.165949141 | 0.999986736 | NA |
| ASV_16s_28172 | 0.061976292 | 0.32507456   | 3.552040753 | 0.284502759 | 0.999916412 | NA |
| ASV_16s_28173 | 0.061976292 | 0.32507456   | 3.552040753 | 0.284502759 | 0.999916412 | NA |
| ASV_16s_28174 | 0.061976292 | 0.32507456   | 3.552040753 | 0.284502759 | 0.999916412 | NA |
| ASV_16s_28175 | 0.061976292 | 0.32507456   | 3.552040753 | 0.284502759 | 0.999916412 | NA |
| ASV_16s_28176 | 0.061976292 | 0.32507456   | 3.552040753 | 0.284502759 | 0.999916412 | NA |
| ASV_16s_28177 | 0.061976292 | 0.32507456   | 3.552040753 | 0.284502759 | 0.999916412 | NA |
| ASV_16s_28178 | 0.075029861 | 0.32562657   | 3.552028077 | 0.323121492 | 0.99987143  | NA |
| ASV_16s_28179 | 0.075029861 | 0.32562657   | 3.552028077 | 0.323121492 | 0.99987143  | NA |
| ASV_16s_28180 | 0.075029861 | 0.32562657   | 3.552028077 | 0.323121492 | 0.99987143  | NA |
| ASV_16s_28181 | 0.075029861 | 0.32562657   | 3.552028077 | 0.323121492 | 0.99987143  | NA |
| ASV_16s_28182 | 0.075029861 | 0.32562657   | 3.552028077 | 0.323121492 | 0.99987143  | NA |
| ASV_16s_28183 | 0.075029861 | 0.32562657   | 3.552028077 | 0.323121492 | 0.99987143  | NA |
| ASV_16s_28184 | 0.075029861 | 0.32562657   | 3.552028077 | 0.323121492 | 0.99987143  | NA |
| ASV_16s_28185 | 0.075029861 | 0.32562657   | 3.552028077 | 0.323121492 | 0.99987143  | NA |
| ASV_16s_28186 | 0.075029861 | 0.32562657   | 3.552028077 | 0.323121492 | 0.99987143  | NA |
| ASV_16s_28187 | 0.075029861 | 0.32562657   | 3.552028077 | 0.323121492 | 0.99987143  | NA |
| ASV_16s_28188 | 0.055698551 | -0.036460322 | 3.551935836 | 0.322621655 | 0.9998721   | NA |
| ASV_16s_28189 | 0.082986243 | 0.3273903    | 3.552012236 | 0.349566854 | 0.999832398 | NA |
| ASV_16s_28190 | 0.082986243 | 0.3273903    | 3.552012236 | 0.349566854 | 0.999832398 | NA |
| ASV_16s_28191 | 0.089859766 | 0.33978086   | 3.551976801 | 0.193897507 | 0.999977376 | NA |
| ASV_16s_28192 | 0.108705598 | 0.335959908  | 3.551949371 | 0.446639023 | 0.999619364 | NA |
| ASV_16s_28193 | 0.108705598 | 0.335959908  | 3.551949371 | 0.446639023 | 0.999619364 | NA |
| ASV_16s_28194 | 0.108705598 | 0.335959908  | 3.551949371 | 0.446639023 | 0.999619364 | NA |
| ASV_16s_28195 | 0.048027925 | 0.324715062  | 3.552040064 | 0.251793055 | 0.999944794 | NA |
| ASV_16s_28196 | 0.048027925 | 0.324715062  | 3.552040064 | 0.251793055 | 0.999944794 | NA |
| ASV_16s_28197 | 0.048027925 | 0.324715062  | 3.552040064 | 0.251793055 | 0.999944794 | NA |
| ASV_16s_28198 | 0.065030882 | 0.324912085  | 3.552039485 | 0.292934946 | 0.999907717 | NA |
| ASV_16s_28199 | 0.065030882 | 0.324912085  | 3.552039485 | 0.292934946 | 0.999907717 | NA |
| ASV_16s_28200 | 0.065030882 | 0.324912085  | 3.552039485 | 0.292934946 | 0.999907717 | NA |
| ASV_16s_28201 | 0.065030882 | 0.324912085  | 3.552039485 | 0.292934946 | 0.999907717 | NA |
| ASV_16s_28202 | 0.065030882 | 0.324912085  | 3.552039485 | 0.292934946 | 0.999907717 | NA |
| ASV_16s_28203 | 0.065030882 | 0.324912085  | 3.552039485 | 0.292934946 | 0.999907717 | NA |
| ASV_16s_28204 | 0.08729315  | 0.32859664   | 3.552002446 | 0.36467961  | 0.999806768 | NA |
| ASV_16s_28205 | 0.08729315  | 0.32859664   | 3.552002446 | 0.36467961  | 0.999806768 | NA |
| ASV_16s_28206 | 0.110765506 | 0.336652251  | 3.551944685 | 0.455048445 | 0.999594999 | NA |
| ASV_16s_28207 | 0.077309444 | 0.326023697  | 3.55202414  | 0.330496439 | 0.999861259 | NA |
| ASV_16s_28208 | 0.083599547 | -0.331150351 | 3.551691695 | 0.358256047 | 0.99981797  | NA |
| ASV_16s_28209 | 0.080360255 | -0.319409359 | 3.551716297 | 0.34699561  | 0.999836511 | NA |
| ASV_16s_28210 | 0.080360255 | -0.319409359 | 3.551716297 | 0.34699561  | 0.999836511 | NA |
| ASV_16s_28211 | 0.080360255 | -0.319409359 | 3.551716297 | 0.34699561  | 0.999836511 | NA |
| ASV_16s_28212 | 0.080360255 | -0.319409359 | 3.551716297 | 0.34699561  | 0.999836511 | NA |
| ASV_16s_28213 | 0.06585989  | 0.320314201  | 3.551868515 | 0.203485412 | 0.999973312 | NA |
| ASV_16s_28214 | 0.069048454 | -0.274786717 | 3.551797829 | 0.310458149 | 0.999887671 | NA |
| ASV_16s_28215 | 0.069048454 | -0.274786717 | 3.551797829 | 0.310458149 | 0.999887671 | NA |
| ASV_16s_28216 | 0.069048454 | -0.274786717 | 3.551797829 | 0.310458149 | 0.999887671 | NA |
| ASV_16s_28217 | 0.047966027 | -0.169505463 | 3.551897791 | 0.257144183 | 0.9999407   | NA |
| ASV_16s_28218 | 0.047966027 | -0.169505463 | 3.551897791 | 0.257144183 | 0.9999407   | NA |
| ASV_16s_28219 | 0.047966027 | -0.169505463 | 3.551897791 | 0.257144183 | 0.9999407   | NA |
| ASV_16s_28220 | 0.047966027 | -0.169505463 | 3.551897791 | 0.257144183 | 0.9999407   | NA |
| ASV_16s_28221 | 0.047966027 | -0.169505463 | 3.551897791 | 0.257144183 | 0.9999407   | NA |

|               |             |              |             |             |                |
|---------------|-------------|--------------|-------------|-------------|----------------|
| ASV_16s_28222 | 0.070562453 | -0.281031991 | 3.551789127 | 0.315080152 | 0.999881919 NA |
| ASV_16s_28223 | 0.070562453 | -0.281031991 | 3.551789127 | 0.315080152 | 0.999881919 NA |
| ASV_16s_28224 | 0.070562453 | -0.281031991 | 3.551789127 | 0.315080152 | 0.999881919 NA |
| ASV_16s_28225 | 0.070562453 | -0.281031991 | 3.551789127 | 0.315080152 | 0.999881919 NA |
| ASV_16s_28226 | 0.062784484 | -0.246807742 | 3.551831929 | 0.292287062 | 0.999908406 NA |
| ASV_16s_28227 | 0.062784484 | -0.246807742 | 3.551831929 | 0.292287062 | 0.999908406 NA |
| ASV_16s_28228 | 0.062784484 | -0.246807742 | 3.551831929 | 0.292287062 | 0.999908406 NA |
| ASV_16s_28229 | 0.088876039 | 1.035892326  | 3.551594941 | 0.201340797 | 0.999974262 NA |
| ASV_16s_28230 | 0.086508416 | 0.925775598  | 3.551685723 | 0.329397472 | 0.999862809 NA |
| ASV_16s_28231 | 0.086508416 | 0.925775598  | 3.551685723 | 0.329397472 | 0.999862809 NA |
| ASV_16s_28232 | 0.13207673  | 1.073634349  | 3.551369313 | 0.482931453 | 0.99950661 NA  |
| ASV_16s_28233 | 0.07111571  | 0.915100555  | 3.55158072  | 0.233968379 | 0.999957009 NA |
| ASV_16s_28234 | 0.07111571  | 0.915100555  | 3.55158072  | 0.233968379 | 0.999957009 NA |
| ASV_16s_28235 | 0.07111571  | 0.915100555  | 3.55158072  | 0.233968379 | 0.999957009 NA |
| ASV_16s_28236 | 0.07111571  | 0.915100555  | 3.55158072  | 0.233968379 | 0.999957009 NA |
| ASV_16s_28237 | 0.07111571  | 0.915100555  | 3.55158072  | 0.233968379 | 0.999957009 NA |
| ASV_16s_28238 | 0.03711555  | 0.744148761  | 3.551840728 | 0.149291455 | 0.999990781 NA |
| ASV_16s_28239 | 0.03711555  | 0.744148761  | 3.551840728 | 0.149291455 | 0.999990781 NA |
| ASV_16s_28240 | 0.102014166 | 1.027500903  | 3.551317334 | 0.32056719  | 0.999874829 NA |
| ASV_16s_28241 | 0.063629128 | 0.883187294  | 3.551645709 | 0.217886417 | 0.999966284 NA |
| ASV_16s_28242 | 0.063629128 | 0.883187294  | 3.551645709 | 0.217886417 | 0.999966284 NA |
| ASV_16s_28243 | 0.063629128 | 0.883187294  | 3.551645709 | 0.217886417 | 0.999966284 NA |
| ASV_16s_28244 | 0.063629128 | 0.883187294  | 3.551645709 | 0.217886417 | 0.999966284 NA |
| ASV_16s_28245 | 0.063629128 | 0.883187294  | 3.551645709 | 0.217886417 | 0.999966284 NA |
| ASV_16s_28246 | 0.063629128 | 0.883187294  | 3.551645709 | 0.217886417 | 0.999966284 NA |
| ASV_16s_28247 | 0.063629128 | 0.883187294  | 3.551645709 | 0.217886417 | 0.999966284 NA |
| ASV_16s_28248 | 0.087698068 | 0.978809186  | 3.55143933  | 0.277119322 | 0.999923544 NA |
| ASV_16s_28249 | 0.087698068 | 0.978809186  | 3.55143933  | 0.277119322 | 0.999923544 NA |
| ASV_16s_28250 | 0.07463772  | 0.343004437  | 3.551777535 | 0.263990682 | 0.99993516 NA  |
| ASV_16s_28251 | 0.074162723 | 0.534892006  | 3.551681271 | 0.305463906 | 0.999893664 NA |
| ASV_16s_28252 | 0.09892868  | 0.346529967  | 3.551701687 | 0.347473331 | 0.999835753 NA |
| ASV_16s_28253 | 0.080428875 | 0.343432056  | 3.551759661 | 0.282246932 | 0.999918638 NA |
| ASV_16s_28254 | 0.080428875 | 0.343432056  | 3.551759661 | 0.282246932 | 0.999918638 NA |
| ASV_16s_28255 | 0.080428875 | 0.343432056  | 3.551759661 | 0.282246932 | 0.999918638 NA |
| ASV_16s_28256 | 0.080428875 | 0.343432056  | 3.551759661 | 0.282246932 | 0.999918638 NA |
| ASV_16s_28257 | 0.080428875 | 0.343432056  | 3.551759661 | 0.282246932 | 0.999918638 NA |
| ASV_16s_28258 | 0.075628376 | 0.343061484  | 3.55177452  | 0.267019255 | 0.999932598 NA |
| ASV_16s_28259 | 0.072961432 | 0.342906225  | 3.551782768 | 0.258943983 | 0.999939277 NA |
| ASV_16s_28260 | 0.072961432 | 0.342906225  | 3.551782768 | 0.258943983 | 0.999939277 NA |
| ASV_16s_28261 | 0.072961432 | 0.342906225  | 3.551782768 | 0.258943983 | 0.999939277 NA |
| ASV_16s_28262 | 0.072961432 | 0.342906225  | 3.551782768 | 0.258943983 | 0.999939277 NA |
| ASV_16s_28263 | 0.06624599  | 0.342501957  | 3.551804887 | 0.239927338 | 0.999953161 NA |
| ASV_16s_28264 | 0.06624599  | 0.342501957  | 3.551804887 | 0.239927338 | 0.999953161 NA |
| ASV_16s_28265 | 0.06624599  | 0.342501957  | 3.551804887 | 0.239927338 | 0.999953161 NA |
| ASV_16s_28266 | 0.06624599  | 0.342501957  | 3.551804887 | 0.239927338 | 0.999953161 NA |
| ASV_16s_28267 | 0.06624599  | 0.342501957  | 3.551804887 | 0.239927338 | 0.999953161 NA |
| ASV_16s_28268 | 0.06624599  | 0.342501957  | 3.551804887 | 0.239927338 | 0.999953161 NA |
| ASV_16s_28269 | 0.054685282 | 0.341745627  | 3.551848847 | 0.212493674 | 0.999969051 NA |
| ASV_16s_28270 | 0.093678389 | 0.345803515  | 3.551714774 | 0.32802665  | 0.999864725 NA |
| ASV_16s_28271 | 0.093678389 | 0.345803515  | 3.551714774 | 0.32802665  | 0.999864725 NA |
| ASV_16s_28272 | 0.093678389 | 0.345803515  | 3.551714774 | 0.32802665  | 0.999864725 NA |
| ASV_16s_28273 | 0.093678389 | 0.345803515  | 3.551714774 | 0.32802665  | 0.999864725 NA |
| ASV_16s_28274 | 0.059167537 | 0.342049266  | 3.551830784 | 0.222239051 | 0.999963928 NA |
| ASV_16s_28275 | 0.059167537 | 0.342049266  | 3.551830784 | 0.222239051 | 0.999963928 NA |
| ASV_16s_28276 | 0.114210921 | 0.346529967  | 3.551701687 | 0.403590096 | 0.999728568 NA |
| ASV_16s_28277 | 0.020601632 | 0.332048301  | 3.55197776  | 0.096302346 | 0.999997971 NA |
| ASV_16s_28278 | 0.083003939 | 0.343917158  | 3.551750203 | 0.290706718 | 0.999910073 NA |
| ASV_16s_28279 | 0.083003939 | 0.343917158  | 3.551750203 | 0.290706718 | 0.999910073 NA |
| ASV_16s_28280 | 0.083003939 | 0.343917158  | 3.551750203 | 0.290706718 | 0.999910073 NA |
| ASV_16s_28281 | 0.083003939 | 0.343917158  | 3.551750203 | 0.290706718 | 0.999910073 NA |
| ASV_16s_28282 | 0.083003939 | 0.343917158  | 3.551750203 | 0.290706718 | 0.999910073 NA |
| ASV_16s_28283 | 0.03324279  | -0.111100986 | 3.551738685 | 0.153702573 | 0.999989809 NA |
| ASV_16s_28284 | 0.03324279  | -0.111100986 | 3.551738685 | 0.153702573 | 0.999989809 NA |
| ASV_16s_28285 | 0.03324279  | -0.111100986 | 3.551738685 | 0.153702573 | 0.999989809 NA |
| ASV_16s_28286 | 0.08154739  | -0.349605901 | 3.551391538 | 0.288325312 | 0.999912544 NA |
| ASV_16s_28287 | 0.08154739  | -0.349605901 | 3.551391538 | 0.288325312 | 0.999912544 NA |
| ASV_16s_28288 | 0.08154739  | -0.349605901 | 3.551391538 | 0.288325312 | 0.999912544 NA |

|               |             |              |             |             |             |    |
|---------------|-------------|--------------|-------------|-------------|-------------|----|
| ASV_16s_28289 | 0.08154739  | -0.349605901 | 3.551391538 | 0.288325312 | 0.999912544 | NA |
| ASV_16s_28290 | 0.08154739  | -0.349605901 | 3.551391538 | 0.288325312 | 0.999912544 | NA |
| ASV_16s_28291 | 0.08154739  | -0.349605901 | 3.551391538 | 0.288325312 | 0.999912544 | NA |
| ASV_16s_28292 | 0.105191126 | -0.376131663 | 3.551331865 | 0.370922955 | 0.999795433 | NA |
| ASV_16s_28293 | 0.113922764 | -0.376131663 | 3.551331865 | 0.40137909  | 0.99973351  | NA |
| ASV_16s_28294 | 0.108573541 | -0.376131663 | 3.551331865 | 0.382732097 | 0.999772755 | NA |
| ASV_16s_28295 | 0.108573541 | -0.376131663 | 3.551331865 | 0.382732097 | 0.999772755 | NA |
| ASV_16s_28296 | 0.108573541 | -0.376131663 | 3.551331865 | 0.382732097 | 0.999772755 | NA |
| ASV_16s_28297 | 0.100439881 | -0.376131663 | 3.551331865 | 0.354310772 | 0.999824623 | NA |
| ASV_16s_28298 | 0.100439881 | -0.376131663 | 3.551331865 | 0.354310772 | 0.999824623 | NA |
| ASV_16s_28299 | 0.040372606 | -0.157664777 | 3.551681376 | 0.183919306 | 0.999981123 | NA |
| ASV_16s_28300 | 0.040372606 | -0.157664777 | 3.551681376 | 0.183919306 | 0.999981123 | NA |
| ASV_16s_28301 | 0.037000624 | -0.136478475 | 3.551706943 | 0.169737273 | 0.999985666 | NA |
| ASV_16s_28302 | 0.06624599  | -0.289151425 | 3.551504837 | 0.241018383 | 0.999952431 | NA |
| ASV_16s_28303 | 0.072975231 | 0.922695378  | 3.551564612 | 0.238326578 | 0.999954217 | NA |
| ASV_16s_28304 | 0.072975231 | 0.922695378  | 3.551564612 | 0.238326578 | 0.999954217 | NA |
| ASV_16s_28305 | 0.072975231 | 0.922695378  | 3.551564612 | 0.238326578 | 0.999954217 | NA |
| ASV_16s_28306 | 0.072975231 | 0.922695378  | 3.551564612 | 0.238326578 | 0.999954217 | NA |
| ASV_16s_28307 | 0.072975231 | 0.922695378  | 3.551564612 | 0.238326578 | 0.999954217 | NA |
| ASV_16s_28308 | 0.072975231 | 0.922695378  | 3.551564612 | 0.238326578 | 0.999954217 | NA |
| ASV_16s_28309 | 0.072975231 | 0.922695378  | 3.551564612 | 0.238326578 | 0.999954217 | NA |
| ASV_16s_28310 | 0.029331762 | 0.689604605  | 3.551876837 | 0.118394191 | 0.999995856 | NA |
| ASV_16s_28311 | 0.072572057 | 0.921039367  | 3.551568367 | 0.237371055 | 0.99995484  | NA |
| ASV_16s_28312 | 0.072572057 | 0.921039367  | 3.551568367 | 0.237371055 | 0.99995484  | NA |
| ASV_16s_28313 | 0.06624599  | -0.076878144 | 3.551336038 | 0.417627814 | 0.999695715 | NA |
| ASV_16s_28314 | 0.06624599  | -0.076878144 | 3.551336038 | 0.417627814 | 0.999695715 | NA |
| ASV_16s_28315 | 0.06624599  | -0.076878144 | 3.551336038 | 0.417627814 | 0.999695715 | NA |
| ASV_16s_28316 | 0.06624599  | -0.076878144 | 3.551336038 | 0.417627814 | 0.999695715 | NA |
| ASV_16s_28317 | 0.06624599  | -0.076878144 | 3.551336038 | 0.417627814 | 0.999695715 | NA |
| ASV_16s_28318 | 0.06624599  | -0.076878144 | 3.551336038 | 0.417627814 | 0.999695715 | NA |
| ASV_16s_28319 | 0.06624599  | -0.076878144 | 3.551336038 | 0.417627814 | 0.999695715 | NA |
| ASV_16s_28320 | 0.06624599  | -0.076878144 | 3.551336038 | 0.417627814 | 0.999695715 | NA |
| ASV_16s_28321 | 0.06624599  | -0.076878144 | 3.551336038 | 0.417627814 | 0.999695715 | NA |
| ASV_16s_28322 | 0.06624599  | -0.076878144 | 3.551336038 | 0.417627814 | 0.999695715 | NA |
| ASV_16s_28323 | 0.06624599  | -0.076878144 | 3.551336038 | 0.417627814 | 0.999695715 | NA |
| ASV_16s_28324 | 0.06624599  | -0.076878144 | 3.551336038 | 0.417627814 | 0.999695715 | NA |
| ASV_16s_28325 | 0.06624599  | -0.076878144 | 3.551336038 | 0.417627814 | 0.999695715 | NA |
| ASV_16s_28326 | 0.06624599  | -0.076878144 | 3.551336038 | 0.417627814 | 0.999695715 | NA |
| ASV_16s_28327 | 0.056488709 | -0.070570581 | 3.551449214 | 0.375807922 | 0.999786251 | NA |
| ASV_16s_28328 | 0.056488709 | -0.070570581 | 3.551449214 | 0.375807922 | 0.999786251 | NA |
| ASV_16s_28329 | 0.056488709 | -0.070570581 | 3.551449214 | 0.375807922 | 0.999786251 | NA |
| ASV_16s_28330 | 0.056488709 | -0.070570581 | 3.551449214 | 0.375807922 | 0.999786251 | NA |
| ASV_16s_28331 | 0.056488709 | -0.070570581 | 3.551449214 | 0.375807922 | 0.999786251 | NA |
| ASV_16s_28332 | 0.056488709 | -0.070570581 | 3.551449214 | 0.375807922 | 0.999786251 | NA |
| ASV_16s_28333 | 0.056488709 | -0.070570581 | 3.551449214 | 0.375807922 | 0.999786251 | NA |
| ASV_16s_28334 | 0.056488709 | -0.070570581 | 3.551449214 | 0.375807922 | 0.999786251 | NA |
| ASV_16s_28335 | 0.056488709 | -0.070570581 | 3.551449214 | 0.375807922 | 0.999786251 | NA |
| ASV_16s_28336 | 0.056488709 | -0.070570581 | 3.551449214 | 0.375807922 | 0.999786251 | NA |
| ASV_16s_28337 | 0.056488709 | -0.070570581 | 3.551449214 | 0.375807922 | 0.999786251 | NA |
| ASV_16s_28338 | 0.056488709 | -0.070570581 | 3.551449214 | 0.375807922 | 0.999786251 | NA |
| ASV_16s_28339 | 0.056488709 | -0.070570581 | 3.551449214 | 0.375807922 | 0.999786251 | NA |
| ASV_16s_28340 | 0.056488709 | -0.070570581 | 3.551449214 | 0.375807922 | 0.999786251 | NA |
| ASV_16s_28341 | 0.056488709 | -0.070570581 | 3.551449214 | 0.375807922 | 0.999786251 | NA |
| ASV_16s_28342 | 0.056488709 | -0.070570581 | 3.551449214 | 0.375807922 | 0.999786251 | NA |
| ASV_16s_28343 | 0.056488709 | -0.070570581 | 3.551449214 | 0.375807922 | 0.999786251 | NA |
| ASV_16s_28344 | 0.056488709 | -0.070570581 | 3.551449214 | 0.375807922 | 0.999786251 | NA |
| ASV_16s_28345 | 0.056488709 | -0.070570581 | 3.551449214 | 0.375807922 | 0.999786251 | NA |
| ASV_16s_28346 | 0.056488709 | -0.070570581 | 3.551449214 | 0.375807922 | 0.999786251 | NA |
| ASV_16s_28347 | 0.056488709 | -0.070570581 | 3.551449214 | 0.375807922 | 0.999786251 | NA |
| ASV_16s_28348 | 0.056488709 | -0.070570581 | 3.551449214 | 0.375807922 | 0.999786251 | NA |
| ASV_16s_28349 | 0.056488709 | -0.070570581 | 3.551449214 | 0.375807922 | 0.999786251 | NA |
| ASV_16s_28350 | 0.063734295 | -0.07634938  | 3.551366194 | 0.406556546 | 0.99972184  | NA |
| ASV_16s_28351 | 0.063734295 | -0.07634938  | 3.551366194 | 0.406556546 | 0.99972184  | NA |
| ASV_16s_28352 | 0.063734295 | -0.07634938  | 3.551366194 | 0.406556546 | 0.99972184  | NA |
| ASV_16s_28353 | 0.063734295 | -0.07634938  | 3.551366194 | 0.406556546 | 0.99972184  | NA |
| ASV_16s_28354 | 0.063734295 | -0.07634938  | 3.551366194 | 0.406556546 | 0.99972184  | NA |
| ASV_16s_28355 | 0.037021534 | 0.229017803  | 3.551268723 | 0.136624753 | 0.999993207 | NA |

|               |             |              |             |             |                |
|---------------|-------------|--------------|-------------|-------------|----------------|
| ASV_16s_28356 | 0.037021534 | 0.229017803  | 3.551268723 | 0.136624753 | 0.999993207 NA |
| ASV_16s_28357 | 0.037021534 | 0.229017803  | 3.551268723 | 0.136624753 | 0.999993207 NA |
| ASV_16s_28358 | 0.037021534 | 0.229017803  | 3.551268723 | 0.136624753 | 0.999993207 NA |
| ASV_16s_28359 | 0.039142267 | 0.227777132  | 3.551241827 | 0.149204044 | 0.999990799 NA |
| ASV_16s_28360 | 0.039142267 | 0.227777132  | 3.551241827 | 0.149204044 | 0.999990799 NA |
| ASV_16s_28361 | 0.041334983 | 0.226562306  | 3.551216752 | 0.16305478  | 0.999987514 NA |
| ASV_16s_28362 | 0.042053891 | 0.226177828  | 3.551209068 | 0.167429108 | 0.999986325 NA |
| ASV_16s_28363 | 0.042053891 | 0.226177828  | 3.551209068 | 0.167429108 | 0.999986325 NA |
| ASV_16s_28364 | 0.042053891 | 0.226177828  | 3.551209068 | 0.167429108 | 0.999986325 NA |
| ASV_16s_28365 | 0.042053891 | 0.226177828  | 3.551209068 | 0.167429108 | 0.999986325 NA |
| ASV_16s_28366 | 0.042053891 | 0.226177828  | 3.551209068 | 0.167429108 | 0.999986325 NA |
| ASV_16s_28367 | 0.042053891 | 0.226177828  | 3.551209068 | 0.167429108 | 0.999986325 NA |
| ASV_16s_28368 | 0.042053891 | 0.226177828  | 3.551209068 | 0.167429108 | 0.999986325 NA |
| ASV_16s_28369 | 0.042053891 | 0.226177828  | 3.551209068 | 0.167429108 | 0.999986325 NA |
| ASV_16s_28370 | 0.042053891 | 0.226177828  | 3.551209068 | 0.167429108 | 0.999986325 NA |
| ASV_16s_28371 | 0.042053891 | 0.226177828  | 3.551209068 | 0.167429108 | 0.999986325 NA |
| ASV_16s_28372 | 0.042023898 | 0.226193726  | 3.551209384 | 0.167247094 | 0.999986376 NA |
| ASV_16s_28373 | 0.041969912 | 0.226222375  | 3.551209953 | 0.166919709 | 0.999986467 NA |
| ASV_16s_28374 | 0.041969912 | 0.226222375  | 3.551209953 | 0.166919709 | 0.999986467 NA |
| ASV_16s_28375 | 0.041969912 | 0.226222375  | 3.551209953 | 0.166919709 | 0.999986467 NA |
| ASV_16s_28376 | 0.041969912 | 0.226222375  | 3.551209953 | 0.166919709 | 0.999986467 NA |
| ASV_16s_28377 | 0.041969912 | 0.226222375  | 3.551209953 | 0.166919709 | 0.999986467 NA |
| ASV_16s_28378 | 0.067615573 | 0.311271323  | 3.551547196 | 0.40861709  | 0.999717099 NA |
| ASV_16s_28379 | 0.071774705 | 0.310979746  | 3.551494983 | 0.427131086 | 0.999671987 NA |
| ASV_16s_28380 | 0.071774705 | 0.310979746  | 3.551494983 | 0.427131086 | 0.999671987 NA |
| ASV_16s_28381 | 0.071774705 | 0.310979746  | 3.551494983 | 0.427131086 | 0.999671987 NA |
| ASV_16s_28382 | 0.071774705 | 0.310979746  | 3.551494983 | 0.427131086 | 0.999671987 NA |
| ASV_16s_28383 | 0.071774705 | 0.310979746  | 3.551494983 | 0.427131086 | 0.999671987 NA |
| ASV_16s_28384 | 0.071774705 | 0.310979746  | 3.551494983 | 0.427131086 | 0.999671987 NA |
| ASV_16s_28385 | 0.071774705 | 0.310979746  | 3.551494983 | 0.427131086 | 0.999671987 NA |
| ASV_16s_28386 | 0.071774705 | 0.310979746  | 3.551494983 | 0.427131086 | 0.999671987 NA |
| ASV_16s_28387 | 0.071774705 | 0.310979746  | 3.551494983 | 0.427131086 | 0.999671987 NA |
| ASV_16s_28388 | 0.071774705 | 0.310979746  | 3.551494983 | 0.427131086 | 0.999671987 NA |
| ASV_16s_28389 | 0.072986272 | 0.310978793  | 3.551480133 | 0.432612763 | 0.99965774 NA  |
| ASV_16s_28390 | 0.072986272 | 0.310978793  | 3.551480133 | 0.432612763 | 0.99965774 NA  |
| ASV_16s_28391 | 0.072986272 | 0.310978793  | 3.551480133 | 0.432612763 | 0.99965774 NA  |
| ASV_16s_28392 | 0.062584285 | 0.312963921  | 3.551606187 | 0.386866567 | 0.999764422 NA |
| ASV_16s_28393 | 0.062584285 | 0.312963921  | 3.551606187 | 0.386866567 | 0.999764422 NA |
| ASV_16s_28394 | 0.062584285 | 0.312963921  | 3.551606187 | 0.386866567 | 0.999764422 NA |
| ASV_16s_28395 | 0.062584285 | 0.312963921  | 3.551606187 | 0.386866567 | 0.999764422 NA |
| ASV_16s_28396 | 0.062584285 | 0.312963921  | 3.551606187 | 0.386866567 | 0.999764422 NA |
| ASV_16s_28397 | 0.062584285 | 0.312963921  | 3.551606187 | 0.386866567 | 0.999764422 NA |
| ASV_16s_28398 | 0.067065903 | 0.311450657  | 3.551553252 | 0.406185424 | 0.999722688 NA |
| ASV_16s_28399 | 0.071547521 | 0.310979928  | 3.551497823 | 0.42610779  | 0.999674601 NA |
| ASV_16s_28400 | 0.071547521 | 0.310979928  | 3.551497823 | 0.42610779  | 0.999674601 NA |
| ASV_16s_28401 | 0.071547521 | 0.310979928  | 3.551497823 | 0.42610779  | 0.999674601 NA |
| ASV_16s_28402 | 0.071547521 | 0.310979928  | 3.551497823 | 0.42610779  | 0.999674601 NA |
| ASV_16s_28403 | 0.071547521 | 0.310979928  | 3.551497823 | 0.42610779  | 0.999674601 NA |
| ASV_16s_28404 | 0.044300455 | 0.594893978  | 3.551154583 | 0.146620513 | 0.999991336 NA |
| ASV_16s_28405 | 0.044300455 | 0.594893978  | 3.551154583 | 0.146620513 | 0.999991336 NA |
| ASV_16s_28406 | 0.044300455 | 0.594893978  | 3.551154583 | 0.146620513 | 0.999991336 NA |
| ASV_16s_28407 | 0.064195048 | 0.685683947  | 3.551580875 | 0.361501775 | 0.999812368 NA |
| ASV_16s_28408 | 0.064195048 | 0.685683947  | 3.551580875 | 0.361501775 | 0.999812368 NA |
| ASV_16s_28409 | 0.074857599 | 0.686133322  | 3.551436685 | 0.400046165 | 0.999736459 NA |
| ASV_16s_28410 | 0.08086818  | 0.321172955  | 3.551800356 | 0.284561022 | 0.999916354 NA |
| ASV_16s_28411 | 0.08193361  | 0.326081455  | 3.551763761 | 0.369324101 | 0.999798379 NA |
| ASV_16s_28412 | 0.077459955 | 0.145128069  | 3.551858859 | 0.243274086 | 0.999950898 NA |
| ASV_16s_28413 | 0.107455171 | 0.030420128  | 3.551663376 | 0.275414739 | 0.999925128 NA |
| ASV_16s_28414 | 0.089747455 | 0.340513822  | 3.551994984 | 0.320060023 | 0.999875497 NA |
| ASV_16s_28415 | 0.091050005 | -0.10806785  | 3.551910607 | 0.352918235 | 0.999826931 NA |
| ASV_16s_28416 | 0.0589663   | -0.02636967  | 3.551726544 | 0.345651893 | 0.999838633 NA |
| ASV_16s_28417 | 0.0589663   | -0.02636967  | 3.551726544 | 0.345651893 | 0.999838633 NA |
| ASV_16s_28418 | 0.094246541 | 0.696762517  | 3.552011249 | 0.354514331 | 0.999824284 NA |
| ASV_16s_28419 | 0.087929534 | 0.332919862  | 3.551995663 | 0.247414075 | 0.999947994 NA |
| ASV_16s_28420 | 0.085580749 | 0.305030016  | 3.551773499 | 0.187371026 | 0.99997988 NA  |
| ASV_16s_28421 | 0.064634547 | 0.045670794  | 3.551847657 | 0.371493343 | 0.999794375 NA |
| ASV_16s_28422 | 0.055336731 | -0.093450787 | 3.551828775 | 0.168505009 | 0.999986021 NA |

|               |             |              |             |             |             |    |
|---------------|-------------|--------------|-------------|-------------|-------------|----|
| ASV_16s_28423 | 0.065442291 | -0.214617562 | 3.551749676 | 0.26627171  | 0.999933237 | NA |
| ASV_16s_28424 | 0.093678389 | 0.902554978  | 3.551736849 | 0.349116465 | 0.999833124 | NA |
| ASV_16s_28425 | 0.070721616 | 0.781062565  | 3.551730599 | 0.271865976 | 0.999928352 | NA |
| ASV_16s_28426 | 0.11230737  | 0.283450704  | 3.551715744 | 0.467618769 | 0.999556623 | NA |
| ASV_16s_28427 | 0.11230737  | 0.283450704  | 3.551715744 | 0.467618769 | 0.999556623 | NA |
| ASV_16s_28428 | 0.034339208 | 0.298260145  | 3.551945396 | 0.199848871 | 0.999974909 | NA |
| ASV_16s_28429 | 0.047623271 | 0.294499353  | 3.55191224  | 0.249348012 | 0.999946597 | NA |
| ASV_16s_28430 | 0.047623271 | 0.294499353  | 3.55191224  | 0.249348012 | 0.999946597 | NA |
| ASV_16s_28431 | 0.028280299 | 0.299960737  | 3.551954093 | 0.169529805 | 0.999985727 | NA |
| ASV_16s_28432 | 0.1010902   | 0.284468379  | 3.551744645 | 0.421316286 | 0.999686665 | NA |
| ASV_16s_28433 | 0.039655734 | 0.297035995  | 3.551933173 | 0.225205496 | 0.999962258 | NA |
| ASV_16s_28434 | 0.079765723 | 0.286680312  | 3.551812689 | 0.341161109 | 0.999845585 | NA |
| ASV_16s_28435 | 0.093678389 | -0.326273448 | 3.551581796 | 0.391943606 | 0.999753905 | NA |
| ASV_16s_28436 | 0.093678389 | -0.326273448 | 3.551581796 | 0.391943606 | 0.999753905 | NA |
| ASV_16s_28437 | 0.048129446 | -0.160145339 | 3.551773849 | 0.252446835 | 0.999944305 | NA |
| ASV_16s_28438 | 0.018287048 | 0.048732436  | 3.551925233 | 0.123344059 | 0.999995226 | NA |
| ASV_16s_28439 | 0.160141332 | 0.978903636  | 3.551341117 | 0.568412361 | 0.999155436 | NA |
| ASV_16s_28440 | 0.129027295 | -0.382366639 | 3.551552819 | 0.529777623 | 0.999329978 | NA |
| ASV_16s_28441 | 0.129027295 | -0.382366639 | 3.551552819 | 0.529777623 | 0.999329978 | NA |
| ASV_16s_28442 | 0.129027295 | -0.382366639 | 3.551552819 | 0.529777623 | 0.999329978 | NA |
| ASV_16s_28443 | 0.129027295 | -0.382366639 | 3.551552819 | 0.529777623 | 0.999329978 | NA |
| ASV_16s_28444 | 0.129027295 | -0.382366639 | 3.551552819 | 0.529777623 | 0.999329978 | NA |
| ASV_16s_28445 | 0.129027295 | -0.382366639 | 3.551552819 | 0.529777623 | 0.999329978 | NA |
| ASV_16s_28446 | 0.129027295 | -0.382366639 | 3.551552819 | 0.529777623 | 0.999329978 | NA |
| ASV_16s_28447 | 0.129027295 | -0.382366639 | 3.551552819 | 0.529777623 | 0.999329978 | NA |
| ASV_16s_28448 | 0.095565427 | 0.113422578  | 3.551682654 | 0.425659793 | 0.999675741 | NA |
| ASV_16s_28449 | 0.13207673  | 1.073634349  | 3.551369313 | 0.482931453 | 0.999506661 | NA |
| ASV_16s_28450 | 0.114210921 | 0.346529967  | 3.551701687 | 0.403590096 | 0.999728568 | NA |
| ASV_16s_28451 | 0.114210921 | 0.346529967  | 3.551701687 | 0.403590096 | 0.999728568 | NA |
| ASV_16s_28452 | 0.083193934 | 0.962570285  | 3.551474191 | 0.264506022 | 0.999934729 | NA |
| ASV_16s_28453 | 0.083193934 | 0.962570285  | 3.551474191 | 0.264506022 | 0.999934729 | NA |
| ASV_16s_28454 | 0.083193934 | 0.962570285  | 3.551474191 | 0.264506022 | 0.999934729 | NA |
| ASV_16s_28455 | 0.083193934 | 0.962570285  | 3.551474191 | 0.264506022 | 0.999934729 | NA |
| ASV_16s_28456 | 0.083193934 | 0.962570285  | 3.551474191 | 0.264506022 | 0.999934729 | NA |
| ASV_16s_28457 | 0.083193934 | 0.962570285  | 3.551474191 | 0.264506022 | 0.999934729 | NA |
| ASV_16s_28458 | 0.083193934 | 0.962570285  | 3.551474191 | 0.264506022 | 0.999934729 | NA |
| ASV_16s_28459 | 0.083193934 | 0.962570285  | 3.551474191 | 0.264506022 | 0.999934729 | NA |
| ASV_16s_28460 | 0.083193934 | 0.962570285  | 3.551474191 | 0.264506022 | 0.999934729 | NA |
| ASV_16s_28461 | 0.083193934 | 0.962570285  | 3.551474191 | 0.264506022 | 0.999934729 | NA |
| ASV_16s_28462 | 0.083193934 | 0.962570285  | 3.551474191 | 0.264506022 | 0.999934729 | NA |
| ASV_16s_28463 | 0.083193934 | 0.962570285  | 3.551474191 | 0.264506022 | 0.999934729 | NA |
| ASV_16s_28464 | 0.083193934 | 0.962570285  | 3.551474191 | 0.264506022 | 0.999934729 | NA |
| ASV_16s_28465 | 0.083193934 | 0.962570285  | 3.551474191 | 0.264506022 | 0.999934729 | NA |
| ASV_16s_28466 | 0.083193934 | 0.962570285  | 3.551474191 | 0.264506022 | 0.999934729 | NA |
| ASV_16s_28467 | 0.083193934 | 0.962570285  | 3.551474191 | 0.264506022 | 0.999934729 | NA |
| ASV_16s_28468 | 0.083193934 | 0.962570285  | 3.551474191 | 0.264506022 | 0.999934729 | NA |
| ASV_16s_28469 | 0.083193934 | 0.962570285  | 3.551474191 | 0.264506022 | 0.999934729 | NA |
| ASV_16s_28470 | 0.047406615 | -0.062211872 | 3.551586338 | 0.340749781 | 0.999846211 | NA |
| ASV_16s_28471 | 0.047406615 | -0.062211872 | 3.551586338 | 0.340749781 | 0.999846211 | NA |
| ASV_16s_28472 | 0.047406615 | -0.062211872 | 3.551586338 | 0.340749781 | 0.999846211 | NA |
| ASV_16s_28473 | 0.047406615 | -0.062211872 | 3.551586338 | 0.340749781 | 0.999846211 | NA |
| ASV_16s_28474 | 0.047406615 | -0.062211872 | 3.551586338 | 0.340749781 | 0.999846211 | NA |
| ASV_16s_28475 | 0.131187045 | -0.028128164 | 3.551138319 | 0.807738186 | 0.997364178 | NA |
| ASV_16s_28476 | 0.131187045 | -0.028128164 | 3.551138319 | 0.807738186 | 0.997364178 | NA |
| ASV_16s_28477 | 0.131187045 | -0.028128164 | 3.551138319 | 0.807738186 | 0.997364178 | NA |
| ASV_16s_28478 | 0.131187045 | -0.028128164 | 3.551138319 | 0.807738186 | 0.997364178 | NA |
| ASV_16s_28479 | 0.131187045 | -0.028128164 | 3.551138319 | 0.807738186 | 0.997364178 | NA |
| ASV_16s_28480 | 0.102976229 | -0.240898931 | 3.551439192 | 0.518797126 | 0.999374702 | NA |
| ASV_16s_28481 | 0.118210132 | 0.222931912  | 3.551209704 | 0.878543437 | 0.99655735  | NA |
| ASV_16s_28482 | 0.131187045 | -0.028128164 | 3.551138319 | 0.807738186 | 0.997364178 | NA |
| ASV_16s_28483 | 0.131187045 | -0.028128164 | 3.551138319 | 0.807738186 | 0.997364178 | NA |
| ASV_16s_28484 | 0.131187045 | -0.028128164 | 3.551138319 | 0.807738186 | 0.997364178 | NA |
| ASV_16s_28485 | 0.131187045 | -0.028128164 | 3.551138319 | 0.807738186 | 0.997364178 | NA |
| ASV_16s_28486 | 0.131187045 | -0.028128164 | 3.551138319 | 0.807738186 | 0.997364178 | NA |
| ASV_16s_28487 | 0.104643089 | -0.024333021 | 3.551286501 | 0.664595815 | 0.998593223 | NA |
| ASV_16s_28488 | 0.104643089 | -0.024333021 | 3.551286501 | 0.664595815 | 0.998593223 | NA |
| ASV_16s_28489 | 0.104643089 | -0.024333021 | 3.551286501 | 0.664595815 | 0.998593223 | NA |

|               |             |              |             |             |                |
|---------------|-------------|--------------|-------------|-------------|----------------|
| ASV_16s_28490 | 0.104643089 | -0.024333021 | 3.551286501 | 0.664595815 | 0.998593223 NA |
| ASV_16s_28491 | 0.104643089 | -0.024333021 | 3.551286501 | 0.664595815 | 0.998593223 NA |
| ASV_16s_28492 | 0.104643089 | -0.024333021 | 3.551286501 | 0.664595815 | 0.998593223 NA |
| ASV_16s_28493 | 0.104643089 | -0.024333021 | 3.551286501 | 0.664595815 | 0.998593223 NA |
| ASV_16s_28494 | 0.104643089 | -0.024333021 | 3.551286501 | 0.664595815 | 0.998593223 NA |
| ASV_16s_28495 | 0.104643089 | -0.024333021 | 3.551286501 | 0.664595815 | 0.998593223 NA |
| ASV_16s_28496 | 0.104643089 | -0.024333021 | 3.551286501 | 0.664595815 | 0.998593223 NA |
| ASV_16s_28497 | 0.104643089 | -0.024333021 | 3.551286501 | 0.664595815 | 0.998593223 NA |
| ASV_16s_28498 | 0.104643089 | -0.024333021 | 3.551286501 | 0.664595815 | 0.998593223 NA |
| ASV_16s_28499 | 0.104643089 | -0.024333021 | 3.551286501 | 0.664595815 | 0.998593223 NA |
| ASV_16s_28500 | 0.104643089 | -0.024333021 | 3.551286501 | 0.664595815 | 0.998593223 NA |
| ASV_16s_28501 | 0.100998564 | 0.10710532   | 3.551301998 | 0.728487351 | 0.99810715 NA  |
| ASV_16s_28502 | 0.098022904 | 0.183196261  | 3.551509145 | 0.565655073 | 0.999168808 NA |
| ASV_16s_28503 | 0.08600673  | 0.466626183  | 3.551519996 | 0.623748115 | 0.998855509 NA |
| ASV_16s_28504 | 0.062546384 | -8.18E-04    | 3.551656804 | 0.457548274 | 0.999587556 NA |
| ASV_16s_28505 | 0.062546384 | -8.18E-04    | 3.551656804 | 0.457548274 | 0.999587556 NA |
| ASV_16s_28506 | 0.062546384 | -8.18E-04    | 3.551656804 | 0.457548274 | 0.999587556 NA |
| ASV_16s_28507 | 0.062546384 | -8.18E-04    | 3.551656804 | 0.457548274 | 0.999587556 NA |
| ASV_16s_28508 | 0.062546384 | -8.18E-04    | 3.551656804 | 0.457548274 | 0.999587556 NA |
| ASV_16s_28509 | 0.062546384 | -8.18E-04    | 3.551656804 | 0.457548274 | 0.999587556 NA |
| ASV_16s_28510 | 0.062546384 | -8.18E-04    | 3.551656804 | 0.457548274 | 0.999587556 NA |
| ASV_16s_28511 | 0.062546384 | -8.18E-04    | 3.551656804 | 0.457548274 | 0.999587556 NA |
| ASV_16s_28512 | 0.071467203 | -0.068015105 | 3.551344464 | 0.464995596 | 0.999564828 NA |
| ASV_16s_28513 | 0.071467203 | -0.068015105 | 3.551344464 | 0.464995596 | 0.999564828 NA |
| ASV_16s_28514 | 0.071467203 | -0.068015105 | 3.551344464 | 0.464995596 | 0.999564828 NA |
| ASV_16s_28515 | 0.052196759 | -0.053964215 | 3.551603728 | 0.38129517  | 0.999775602 NA |
| ASV_16s_28516 | 0.052196759 | -0.053964215 | 3.551603728 | 0.38129517  | 0.999775602 NA |
| ASV_16s_28517 | 0.052196759 | -0.053964215 | 3.551603728 | 0.38129517  | 0.999775602 NA |
| ASV_16s_28518 | 0.052196759 | -0.053964215 | 3.551603728 | 0.38129517  | 0.999775602 NA |
| ASV_16s_28519 | 0.052196759 | -0.053964215 | 3.551603728 | 0.38129517  | 0.999775602 NA |
| ASV_16s_28520 | 0.052196759 | -0.053964215 | 3.551603728 | 0.38129517  | 0.999775602 NA |
| ASV_16s_28521 | 0.052196759 | -0.053964215 | 3.551603728 | 0.38129517  | 0.999775602 NA |
| ASV_16s_28522 | 0.05125887  | -0.0529487   | 3.551619812 | 0.377608796 | 0.999782796 NA |
| ASV_16s_28523 | 0.05125887  | -0.0529487   | 3.551619812 | 0.377608796 | 0.999782796 NA |
| ASV_16s_28524 | 0.05125887  | -0.0529487   | 3.551619812 | 0.377608796 | 0.999782796 NA |
| ASV_16s_28525 | 0.05125887  | -0.0529487   | 3.551619812 | 0.377608796 | 0.999782796 NA |
| ASV_16s_28526 | 0.05125887  | -0.0529487   | 3.551619812 | 0.377608796 | 0.999782796 NA |
| ASV_16s_28527 | 0.05125887  | -0.0529487   | 3.551619812 | 0.377608796 | 0.999782796 NA |
| ASV_16s_28528 | 0.05125887  | -0.0529487   | 3.551619812 | 0.377608796 | 0.999782796 NA |
| ASV_16s_28529 | 0.05125887  | -0.0529487   | 3.551619812 | 0.377608796 | 0.999782796 NA |
| ASV_16s_28530 | 0.05125887  | -0.0529487   | 3.551619812 | 0.377608796 | 0.999782796 NA |
| ASV_16s_28531 | 0.05125887  | -0.0529487   | 3.551619812 | 0.377608796 | 0.999782796 NA |
| ASV_16s_28532 | 0.086508416 | -0.072250713 | 3.551208363 | 0.537464885 | 0.999297409 NA |
| ASV_16s_28533 | 0.086508416 | -0.072250713 | 3.551208363 | 0.537464885 | 0.999297409 NA |
| ASV_16s_28534 | 0.086508416 | -0.072250713 | 3.551208363 | 0.537464885 | 0.999297409 NA |
| ASV_16s_28535 | 0.086508416 | -0.072250713 | 3.551208363 | 0.537464885 | 0.999297409 NA |
| ASV_16s_28536 | 0.086508416 | -0.072250713 | 3.551208363 | 0.537464885 | 0.999297409 NA |
| ASV_16s_28537 | 0.086508416 | -0.072250713 | 3.551208363 | 0.537464885 | 0.999297409 NA |
| ASV_16s_28538 | 0.086508416 | -0.072250713 | 3.551208363 | 0.537464885 | 0.999297409 NA |
| ASV_16s_28539 | 0.086508416 | -0.072250713 | 3.551208363 | 0.537464885 | 0.999297409 NA |
| ASV_16s_28540 | 0.086508416 | -0.072250713 | 3.551208363 | 0.537464885 | 0.999297409 NA |
| ASV_16s_28541 | 0.086508416 | -0.072250713 | 3.551208363 | 0.537464885 | 0.999297409 NA |
| ASV_16s_28542 | 0.063599995 | -0.062781781 | 3.551433096 | 0.429207988 | 0.999666638 NA |
| ASV_16s_28543 | 0.063599995 | -0.062781781 | 3.551433096 | 0.429207988 | 0.999666638 NA |
| ASV_16s_28544 | 0.063599995 | -0.062781781 | 3.551433096 | 0.429207988 | 0.999666638 NA |
| ASV_16s_28545 | 0.063599995 | -0.062781781 | 3.551433096 | 0.429207988 | 0.999666638 NA |
| ASV_16s_28546 | 0.063599995 | -0.062781781 | 3.551433096 | 0.429207988 | 0.999666638 NA |
| ASV_16s_28547 | 0.063599995 | -0.062781781 | 3.551433096 | 0.429207988 | 0.999666638 NA |
| ASV_16s_28548 | 0.063599995 | -0.062781781 | 3.551433096 | 0.429207988 | 0.999666638 NA |
| ASV_16s_28549 | 0.063599995 | -0.062781781 | 3.551433096 | 0.429207988 | 0.999666638 NA |
| ASV_16s_28550 | 0.063599995 | -0.062781781 | 3.551433096 | 0.429207988 | 0.999666638 NA |
| ASV_16s_28551 | 0.071348066 | 0.346110641  | 3.551774327 | 0.484603702 | 0.999500926 NA |
| ASV_16s_28552 | 0.071348066 | 0.346110641  | 3.551774327 | 0.484603702 | 0.999500926 NA |
| ASV_16s_28553 | 0.071348066 | 0.346110641  | 3.551774327 | 0.484603702 | 0.999500926 NA |
| ASV_16s_28554 | 0.071348066 | 0.346110641  | 3.551774327 | 0.484603702 | 0.999500926 NA |
| ASV_16s_28555 | 0.071348066 | 0.346110641  | 3.551774327 | 0.484603702 | 0.999500926 NA |
| ASV_16s_28556 | 0.071348066 | 0.346110641  | 3.551774327 | 0.484603702 | 0.999500926 NA |





|               |             |             |             |             |                |
|---------------|-------------|-------------|-------------|-------------|----------------|
| ASV_16s_28624 | 0.071036728 | 0.315940938 | 3.551590167 | 0.446522572 | 0.999619694 NA |
| ASV_16s_28625 | 0.071036728 | 0.315940938 | 3.551590167 | 0.446522572 | 0.999619694 NA |
| ASV_16s_28626 | 0.067956968 | 0.315941006 | 3.551634871 | 0.432836025 | 0.99965715 NA  |
| ASV_16s_28627 | 0.096774373 | 0.384787267 | 3.551273786 | 0.647377589 | 0.998708205 NA |
| ASV_16s_28628 | 0.110284314 | 0.315940295 | 3.55123692  | 0.638827548 | 0.998762887 NA |
| ASV_16s_28629 | 0.110284314 | 0.315940295 | 3.55123692  | 0.638827548 | 0.998762887 NA |
| ASV_16s_28630 | 0.088265152 | 0.315940638 | 3.551397193 | 0.527171088 | 0.999340784 NA |
| ASV_16s_28631 | 0.06624599  | 0.315941068 | 3.551661041 | 0.42536634  | 0.999676486 NA |
| ASV_16s_28632 | 0.06624599  | 0.315941068 | 3.551661041 | 0.42536634  | 0.999676486 NA |
| ASV_16s_28633 | 0.06624599  | 0.315941068 | 3.551661041 | 0.42536634  | 0.999676486 NA |
| ASV_16s_28634 | 0.06624599  | 0.315941068 | 3.551661041 | 0.42536634  | 0.999676486 NA |
| ASV_16s_28635 | 0.06624599  | 0.315941068 | 3.551661041 | 0.42536634  | 0.999676486 NA |
| ASV_16s_28636 | 0.06624599  | 0.315941068 | 3.551661041 | 0.42536634  | 0.999676486 NA |
| ASV_16s_28637 | 0.06624599  | 0.315941068 | 3.551661041 | 0.42536634  | 0.999676486 NA |
| ASV_16s_28638 | 0.06624599  | 0.315941068 | 3.551661041 | 0.42536634  | 0.999676486 NA |
| ASV_16s_28639 | 0.06624599  | 0.315941068 | 3.551661041 | 0.42536634  | 0.999676486 NA |
| ASV_16s_28640 | 0.06624599  | 0.315941068 | 3.551661041 | 0.42536634  | 0.999676486 NA |
| ASV_16s_28641 | 0.06624599  | 0.315941068 | 3.551661041 | 0.42536634  | 0.999676486 NA |
| ASV_16s_28642 | 0.06624599  | 0.315941068 | 3.551661041 | 0.42536634  | 0.999676486 NA |
| ASV_16s_28643 | 0.06624599  | 0.315941068 | 3.551661041 | 0.42536634  | 0.999676486 NA |
| ASV_16s_28644 | 0.06624599  | 0.315941068 | 3.551661041 | 0.42536634  | 0.999676486 NA |
| ASV_16s_28645 | 0.06624599  | 0.315941068 | 3.551661041 | 0.42536634  | 0.999676486 NA |
| ASV_16s_28646 | 0.06624599  | 0.315941068 | 3.551661041 | 0.42536634  | 0.999676486 NA |
| ASV_16s_28647 | 0.06624599  | 0.315941068 | 3.551661041 | 0.42536634  | 0.999676486 NA |
| ASV_16s_28648 | 0.06624599  | 0.315941068 | 3.551661041 | 0.42536634  | 0.999676486 NA |
| ASV_16s_28649 | 0.06624599  | 0.315941068 | 3.551661041 | 0.42536634  | 0.999676486 NA |
| ASV_16s_28650 | 0.06624599  | 0.315941068 | 3.551661041 | 0.42536634  | 0.999676486 NA |
| ASV_16s_28651 | 0.06624599  | 0.315941068 | 3.551661041 | 0.42536634  | 0.999676486 NA |
| ASV_16s_28652 | 0.06624599  | 0.315941068 | 3.551661041 | 0.42536634  | 0.999676486 NA |
| ASV_16s_28653 | 0.06624599  | 0.315941068 | 3.551661041 | 0.42536634  | 0.999676486 NA |
| ASV_16s_28654 | 0.06624599  | 0.315941068 | 3.551661041 | 0.42536634  | 0.999676486 NA |
| ASV_16s_28655 | 0.06624599  | 0.315941068 | 3.551661041 | 0.42536634  | 0.999676486 NA |
| ASV_16s_28656 | 0.06624599  | 0.315941068 | 3.551661041 | 0.42536634  | 0.999676486 NA |
| ASV_16s_28657 | 0.06624599  | 0.315941068 | 3.551661041 | 0.42536634  | 0.999676486 NA |
| ASV_16s_28658 | 0.06624599  | 0.315941068 | 3.551661041 | 0.42536634  | 0.999676486 NA |
| ASV_16s_28659 | 0.06624599  | 0.315941068 | 3.551661041 | 0.42536634  | 0.999676486 NA |
| ASV_16s_28660 | 0.06624599  | 0.315941068 | 3.551661041 | 0.42536634  | 0.999676486 NA |
| ASV_16s_28661 | 0.06624599  | 0.315941068 | 3.551661041 | 0.42536634  | 0.999676486 NA |
| ASV_16s_28662 | 0.124717509 | 0.315940172 | 3.551162418 | 0.714926972 | 0.998218397 NA |
| ASV_16s_28663 | 0.089196986 | 0.595671529 | 3.550858544 | 0.313485833 | 0.999883925 NA |
| ASV_16s_28664 | 0.089196986 | 0.595671529 | 3.550858544 | 0.313485833 | 0.999883925 NA |
| ASV_16s_28665 | 0.089196986 | 0.595671529 | 3.550858544 | 0.313485833 | 0.999883925 NA |
| ASV_16s_28666 | 0.089196986 | 0.595671529 | 3.550858544 | 0.313485833 | 0.999883925 NA |
| ASV_16s_28667 | 0.063088509 | 0.685629094 | 3.551598585 | 0.357714904 | 0.999818893 NA |
| ASV_16s_28668 | 0.063088509 | 0.685629094 | 3.551598585 | 0.357714904 | 0.999818893 NA |
| ASV_16s_28669 | 0.113973804 | 0.687066062 | 3.55113664  | 0.56233136  | 0.999184735 NA |
| ASV_16s_28670 | 0.113973804 | 0.687066062 | 3.55113664  | 0.56233136  | 0.999184735 NA |
| ASV_16s_28671 | 0.113973804 | 0.687066062 | 3.55113664  | 0.56233136  | 0.999184735 NA |
| ASV_16s_28672 | 0.140221152 | 0.730950084 | 3.551336477 | 0.746633371 | 0.99795121 NA  |
| ASV_16s_28673 | 0.140221152 | 0.730950084 | 3.551336477 | 0.746633371 | 0.99795121 NA  |
| ASV_16s_28674 | 0.140221152 | 0.730950084 | 3.551336477 | 0.746633371 | 0.99795121 NA  |
| ASV_16s_28675 | 0.140221152 | 0.730950084 | 3.551336477 | 0.746633371 | 0.99795121 NA  |
| ASV_16s_28676 | 0.140221152 | 0.730950084 | 3.551336477 | 0.746633371 | 0.99795121 NA  |
| ASV_16s_28677 | 0.140221152 | 0.730950084 | 3.551336477 | 0.746633371 | 0.99795121 NA  |
| ASV_16s_28678 | 0.116654577 | 0.722188396 | 3.551456946 | 0.638131254 | 0.998767271 NA |
| ASV_16s_28679 | 0.103562035 | 0.711639319 | 3.551521587 | 0.580025194 | 0.999097522 NA |
| ASV_16s_28680 | 0.103562035 | 0.711639319 | 3.551521587 | 0.580025194 | 0.999097522 NA |
| ASV_16s_28681 | 0.103562035 | 0.711639319 | 3.551521587 | 0.580025194 | 0.999097522 NA |
| ASV_16s_28682 | 0.103562035 | 0.711639319 | 3.551521587 | 0.580025194 | 0.999097522 NA |
| ASV_16s_28683 | 0.103562035 | 0.711639319 | 3.551521587 | 0.580025194 | 0.999097522 NA |
| ASV_16s_28684 | 0.103562035 | 0.711639319 | 3.551521587 | 0.580025194 | 0.999097522 NA |
| ASV_16s_28685 | 0.103562035 | 0.711639319 | 3.551521587 | 0.580025194 | 0.999097522 NA |
| ASV_16s_28686 | 0.096736293 | 0.70492317  | 3.551558133 | 0.550357494 | 0.999240406 NA |
| ASV_16s_28687 | 0.079680303 | 0.811102808 | 3.551675214 | 0.355666108 | 0.999822357 NA |
| ASV_16s_28688 | 0.103562035 | 0.711639319 | 3.551521587 | 0.580025194 | 0.999097522 NA |
| ASV_16s_28689 | 0.103562035 | 0.711639319 | 3.551521587 | 0.580025194 | 0.999097522 NA |
| ASV_16s_28690 | 0.103562035 | 0.711639319 | 3.551521587 | 0.580025194 | 0.999097522 NA |





|               |             |             |             |             |                |
|---------------|-------------|-------------|-------------|-------------|----------------|
| ASV_16s_28825 | 0.083784175 | 0.685496241 | 3.551418051 | 0.458560262 | 0.999584516 NA |
| ASV_16s_28826 | 0.083784175 | 0.685496241 | 3.551418051 | 0.458560262 | 0.999584516 NA |
| ASV_16s_28827 | 0.087600914 | 0.687443798 | 3.551385177 | 0.474080629 | 0.999535962 NA |
| ASV_16s_28828 | 0.078176179 | 0.682458996 | 3.551471773 | 0.436189855 | 0.999648217 NA |
| ASV_16s_28829 | 0.073762355 | 0.679912006 | 3.551519176 | 0.419165829 | 0.999691957 NA |
| ASV_16s_28830 | 0.0712569   | 0.678216822 | 3.551547631 | 0.409702871 | 0.999714579 NA |
| ASV_16s_28831 | 0.06624599  | 0.67236126  | 3.551599175 | 0.39119214  | 0.999755482 NA |
| ASV_16s_28832 | 0.06624599  | 0.67236126  | 3.551599175 | 0.39119214  | 0.999755482 NA |
| ASV_16s_28833 | 0.06624599  | 0.67236126  | 3.551599175 | 0.39119214  | 0.999755482 NA |
| ASV_16s_28834 | 0.06624599  | 0.67236126  | 3.551599175 | 0.39119214  | 0.999755482 NA |
| ASV_16s_28835 | 0.06624599  | 0.67236126  | 3.551599175 | 0.39119214  | 0.999755482 NA |
| ASV_16s_28836 | 0.06624599  | 0.67236126  | 3.551599175 | 0.39119214  | 0.999755482 NA |
| ASV_16s_28837 | 0.06624599  | 0.67236126  | 3.551599175 | 0.39119214  | 0.999755482 NA |
| ASV_16s_28838 | 0.06624599  | 0.67236126  | 3.551599175 | 0.39119214  | 0.999755482 NA |
| ASV_16s_28839 | 0.06624599  | 0.67236126  | 3.551599175 | 0.39119214  | 0.999755482 NA |
| ASV_16s_28840 | 0.06624599  | 0.67236126  | 3.551599175 | 0.39119214  | 0.999755482 NA |
| ASV_16s_28841 | 0.06624599  | 0.67236126  | 3.551599175 | 0.39119214  | 0.999755482 NA |
| ASV_16s_28842 | 0.06624599  | 0.67236126  | 3.551599175 | 0.39119214  | 0.999755482 NA |
| ASV_16s_28843 | 0.06624599  | 0.67236126  | 3.551599175 | 0.39119214  | 0.999755482 NA |
| ASV_16s_28844 | 0.06624599  | 0.67236126  | 3.551599175 | 0.39119214  | 0.999755482 NA |
| ASV_16s_28845 | 0.06624599  | 0.67236126  | 3.551599175 | 0.39119214  | 0.999755482 NA |
| ASV_16s_28846 | 0.06624599  | 0.67236126  | 3.551599175 | 0.39119214  | 0.999755482 NA |
| ASV_16s_28847 | 0.06624599  | 0.67236126  | 3.551599175 | 0.39119214  | 0.999755482 NA |
| ASV_16s_28848 | 0.06624599  | 0.67236126  | 3.551599175 | 0.39119214  | 0.999755482 NA |
| ASV_16s_28849 | 0.06624599  | 0.67236126  | 3.551599175 | 0.39119214  | 0.999755482 NA |
| ASV_16s_28850 | 0.06624599  | 0.67236126  | 3.551599175 | 0.39119214  | 0.999755482 NA |
| ASV_16s_28851 | 0.06624599  | 0.67236126  | 3.551599175 | 0.39119214  | 0.999755482 NA |
| ASV_16s_28852 | 0.06624599  | 0.67236126  | 3.551599175 | 0.39119214  | 0.999755482 NA |
| ASV_16s_28853 | 0.06624599  | 0.67236126  | 3.551599175 | 0.39119214  | 0.999755482 NA |
| ASV_16s_28854 | 0.06624599  | 0.67236126  | 3.551599175 | 0.39119214  | 0.999755482 NA |
| ASV_16s_28855 | 0.06624599  | 0.67236126  | 3.551599175 | 0.39119214  | 0.999755482 NA |
| ASV_16s_28856 | 0.075073639 | 0.680680164 | 3.551504644 | 0.424117728 | 0.999679643 NA |
| ASV_16s_28857 | 0.09731886  | 0.690449196 | 3.551308802 | 0.514636348 | 0.999391105 NA |
| ASV_16s_28858 | 0.09731886  | 0.690449196 | 3.551308802 | 0.514636348 | 0.999391105 NA |
| ASV_16s_28859 | 0.09731886  | 0.690449196 | 3.551308802 | 0.514636348 | 0.999391105 NA |
| ASV_16s_28860 | 0.09731886  | 0.690449196 | 3.551308802 | 0.514636348 | 0.999391105 NA |
| ASV_16s_28861 | 0.09731886  | 0.690449196 | 3.551308802 | 0.514636348 | 0.999391105 NA |
| ASV_16s_28862 | 0.09731886  | 0.690449196 | 3.551308802 | 0.514636348 | 0.999391105 NA |
| ASV_16s_28863 | 0.09731886  | 0.690449196 | 3.551308802 | 0.514636348 | 0.999391105 NA |
| ASV_16s_28864 | 0.097142761 | 0.690404038 | 3.55131007  | 0.513889172 | 0.999394019 NA |
| ASV_16s_28865 | 0.097142761 | 0.690404038 | 3.55131007  | 0.513889172 | 0.999394019 NA |
| ASV_16s_28866 | 0.097142761 | 0.690404038 | 3.55131007  | 0.513889172 | 0.999394019 NA |
| ASV_16s_28867 | 0.105251038 | 0.936689012 | 3.551669652 | 0.383916572 | 0.999770389 NA |
| ASV_16s_28868 | 0.089496799 | 0.30111378  | 3.551944678 | 0.370003284 | 0.999797131 NA |
| ASV_16s_28869 | 0.089496799 | 0.30111378  | 3.551944678 | 0.370003284 | 0.999797131 NA |
| ASV_16s_28870 | 0.05303508  | 0.308196365 | 3.55197318  | 0.250610915 | 0.999945671 NA |
| ASV_16s_28871 | 0.05303508  | 0.308196365 | 3.55197318  | 0.250610915 | 0.999945671 NA |
| ASV_16s_28872 | 0.05303508  | 0.308196365 | 3.55197318  | 0.250610915 | 0.999945671 NA |
| ASV_16s_28873 | 0.05303508  | 0.308196365 | 3.55197318  | 0.250610915 | 0.999945671 NA |
| ASV_16s_28874 | 0.05303508  | 0.308196365 | 3.55197318  | 0.250610915 | 0.999945671 NA |
| ASV_16s_28875 | 0.05303508  | 0.308196365 | 3.55197318  | 0.250610915 | 0.999945671 NA |
| ASV_16s_28876 | 0.05303508  | 0.308196365 | 3.55197318  | 0.250610915 | 0.999945671 NA |
| ASV_16s_28877 | 0.05303508  | 0.308196365 | 3.55197318  | 0.250610915 | 0.999945671 NA |
| ASV_16s_28878 | 0.05303508  | 0.308196365 | 3.55197318  | 0.250610915 | 0.999945671 NA |
| ASV_16s_28879 | 0.05303508  | 0.308196365 | 3.55197318  | 0.250610915 | 0.999945671 NA |
| ASV_16s_28880 | 0.05303508  | 0.308196365 | 3.55197318  | 0.250610915 | 0.999945671 NA |
| ASV_16s_28881 | 0.05303508  | 0.308196365 | 3.55197318  | 0.250610915 | 0.999945671 NA |
| ASV_16s_28882 | 0.05303508  | 0.308196365 | 3.55197318  | 0.250610915 | 0.999945671 NA |
| ASV_16s_28883 | 0.05303508  | 0.308196365 | 3.55197318  | 0.250610915 | 0.999945671 NA |
| ASV_16s_28884 | 0.05303508  | 0.308196365 | 3.55197318  | 0.250610915 | 0.999945671 NA |
| ASV_16s_28885 | 0.05303508  | 0.308196365 | 3.55197318  | 0.250610915 | 0.999945671 NA |
| ASV_16s_28886 | 0.05303508  | 0.308196365 | 3.55197318  | 0.250610915 | 0.999945671 NA |
| ASV_16s_28887 | 0.05303508  | 0.308196365 | 3.55197318  | 0.250610915 | 0.999945671 NA |
| ASV_16s_28888 | 0.05303508  | 0.308196365 | 3.55197318  | 0.250610915 | 0.999945671 NA |
| ASV_16s_28889 | 0.05303508  | 0.308196365 | 3.55197318  | 0.250610915 | 0.999945671 NA |
| ASV_16s_28890 | 0.05303508  | 0.308196365 | 3.55197318  | 0.250610915 | 0.999945671 NA |
| ASV_16s_28891 | 0.05303508  | 0.308196365 | 3.55197318  | 0.250610915 | 0.999945671 NA |



|               |             |              |             |             |                |
|---------------|-------------|--------------|-------------|-------------|----------------|
| ASV_16s_28959 | 0.05303508  | 0.308196365  | 3.55197318  | 0.250610915 | 0.999945671 NA |
| ASV_16s_28960 | 0.05303508  | 0.308196365  | 3.55197318  | 0.250610915 | 0.999945671 NA |
| ASV_16s_28961 | 0.05303508  | 0.308196365  | 3.55197318  | 0.250610915 | 0.999945671 NA |
| ASV_16s_28962 | 0.05303508  | 0.308196365  | 3.55197318  | 0.250610915 | 0.999945671 NA |
| ASV_16s_28963 | 0.05303508  | 0.308196365  | 3.55197318  | 0.250610915 | 0.999945671 NA |
| ASV_16s_28964 | 0.05303508  | 0.308196365  | 3.55197318  | 0.250610915 | 0.999945671 NA |
| ASV_16s_28965 | 0.05303508  | 0.308196365  | 3.55197318  | 0.250610915 | 0.999945671 NA |
| ASV_16s_28966 | 0.05303508  | 0.308196365  | 3.55197318  | 0.250610915 | 0.999945671 NA |
| ASV_16s_28967 | 0.05303508  | 0.308196365  | 3.55197318  | 0.250610915 | 0.999945671 NA |
| ASV_16s_28968 | 0.05303508  | 0.308196365  | 3.55197318  | 0.250610915 | 0.999945671 NA |
| ASV_16s_28969 | 0.05303508  | 0.308196365  | 3.55197318  | 0.250610915 | 0.999945671 NA |
| ASV_16s_28970 | 0.05303508  | 0.308196365  | 3.55197318  | 0.250610915 | 0.999945671 NA |
| ASV_16s_28971 | 0.05303508  | 0.308196365  | 3.55197318  | 0.250610915 | 0.999945671 NA |
| ASV_16s_28972 | 0.05303508  | 0.308196365  | 3.55197318  | 0.250610915 | 0.999945671 NA |
| ASV_16s_28973 | 0.057686734 | 0.162181523  | 3.551929103 | 0.308413346 | 0.999890152 NA |
| ASV_16s_28974 | 0.053063601 | 0.078856657  | 3.551897568 | 0.299110482 | 0.999900963 NA |
| ASV_16s_28975 | 0.060787837 | 0.061821735  | 3.551884629 | 0.334020785 | 0.999856207 NA |
| ASV_16s_28976 | 0.053063601 | 0.078856657  | 3.551897568 | 0.299110482 | 0.999900963 NA |
| ASV_16s_28977 | 0.054329675 | 0.067897915  | 3.55188921  | 0.303900912 | 0.999895493 NA |
| ASV_16s_28978 | 0.054588594 | 0.028291008  | 3.551870774 | 0.308022802 | 0.999890622 NA |
| ASV_16s_28979 | 0.053069305 | 0.040430287  | 3.551879835 | 0.302287778 | 0.999897358 NA |
| ASV_16s_28980 | 0.053069305 | 0.040430287  | 3.551879835 | 0.302287778 | 0.999897358 NA |
| ASV_16s_28981 | 0.054588594 | 0.028291008  | 3.551870774 | 0.308022802 | 0.999890622 NA |
| ASV_16s_28982 | 0.053069305 | 0.040430287  | 3.551879835 | 0.302287778 | 0.999897358 NA |
| ASV_16s_28983 | 0.054588594 | 0.028291008  | 3.551870774 | 0.308022802 | 0.999890622 NA |
| ASV_16s_28984 | 0.054847512 | -0.009508751 | 3.551854604 | 0.309677372 | 0.999888623 NA |
| ASV_16s_28985 | 0.053075009 | 0.003647092  | 3.551864255 | 0.303085964 | 0.999896438 NA |
| ASV_16s_28986 | 0.06388894  | -0.040548459 | 3.551832531 | 0.348368425 | 0.999834324 NA |
| ASV_16s_28987 | 0.054847512 | -0.009508751 | 3.551854604 | 0.309677372 | 0.999888623 NA |
| ASV_16s_28988 | 0.053075009 | 0.003647092  | 3.551864255 | 0.303085964 | 0.999896438 NA |
| ASV_16s_28989 | 0.054847512 | -0.009508751 | 3.551854604 | 0.309677372 | 0.999888623 NA |
| ASV_16s_28990 | 0.065439491 | -0.092361006 | 3.551804419 | 0.351355307 | 0.999829496 NA |
| ASV_16s_28991 | 0.055106431 | -0.045929407 | 3.551840342 | 0.30886809  | 0.999889604 NA |
| ASV_16s_28992 | 0.053080713 | -0.031891121 | 3.551850507 | 0.301530069 | 0.999898226 NA |
| ASV_16s_28993 | 0.055106431 | -0.045929407 | 3.551840342 | 0.30886809  | 0.999889604 NA |
| ASV_16s_28994 | 0.055106431 | -0.045929407 | 3.551840342 | 0.30886809  | 0.999889604 NA |
| ASV_16s_28995 | 0.060804949 | -0.062430948 | 3.551828652 | 0.332039326 | 0.999859063 NA |
| ASV_16s_28996 | 0.053086417 | -0.066537041 | 3.551838359 | 0.297618398 | 0.999902625 NA |
| ASV_16s_28997 | 0.018959403 | 0.039765243  | 3.551943063 | 0.132090454 | 0.999993953 NA |
| ASV_16s_28998 | 0.018959403 | 0.039765243  | 3.551943063 | 0.132090454 | 0.999993953 NA |
| ASV_16s_28999 | 0.089970131 | -0.373690717 | 3.551534508 | 0.386510908 | 0.999765147 NA |
| ASV_16s_29000 | 0.089970131 | -0.373690717 | 3.551534508 | 0.386510908 | 0.999765147 NA |
| ASV_16s_29001 | 0.089970131 | -0.373690717 | 3.551534508 | 0.386510908 | 0.999765147 NA |
| ASV_16s_29002 | 0.080524042 | -0.323225396 | 3.551629638 | 0.349643647 | 0.999832275 NA |
| ASV_16s_29003 | 0.072356567 | -0.299684607 | 3.55167008  | 0.319908089 | 0.999875696 NA |
| ASV_16s_29004 | 0.072356567 | -0.299684607 | 3.55167008  | 0.319908089 | 0.999875696 NA |
| ASV_16s_29005 | 0.072356567 | -0.299684607 | 3.55167008  | 0.319908089 | 0.999875696 NA |
| ASV_16s_29006 | 0.072356567 | -0.299684607 | 3.55167008  | 0.319908089 | 0.999875696 NA |
| ASV_16s_29007 | 0.072356567 | -0.299684607 | 3.55167008  | 0.319908089 | 0.999875696 NA |
| ASV_16s_29008 | 0.072356567 | -0.299684607 | 3.55167008  | 0.319908089 | 0.999875696 NA |
| ASV_16s_29009 | 0.072356567 | -0.299684607 | 3.55167008  | 0.319908089 | 0.999875696 NA |
| ASV_16s_29010 | 0.072356567 | -0.299684607 | 3.55167008  | 0.319908089 | 0.999875696 NA |
| ASV_16s_29011 | 0.072356567 | -0.299684607 | 3.55167008  | 0.319908089 | 0.999875696 NA |
| ASV_16s_29012 | 0.072356567 | -0.299684607 | 3.55167008  | 0.319908089 | 0.999875696 NA |
| ASV_16s_29013 | 0.074620237 | -0.309882998 | 3.55165351  | 0.327901363 | 0.999864899 NA |
| ASV_16s_29014 | 0.074620237 | -0.309882998 | 3.55165351  | 0.327901363 | 0.999864899 NA |
| ASV_16s_29015 | 0.074620237 | -0.309882998 | 3.55165351  | 0.327901363 | 0.999864899 NA |
| ASV_16s_29016 | 0.074620237 | -0.309882998 | 3.55165351  | 0.327901363 | 0.999864899 NA |
| ASV_16s_29017 | 0.074620237 | -0.309882998 | 3.55165351  | 0.327901363 | 0.999864899 NA |
| ASV_16s_29018 | 0.074620237 | -0.309882998 | 3.55165351  | 0.327901363 | 0.999864899 NA |
| ASV_16s_29019 | 0.074620237 | -0.309882998 | 3.55165351  | 0.327901363 | 0.999864899 NA |
| ASV_16s_29020 | 0.074620237 | -0.309882998 | 3.55165351  | 0.327901363 | 0.999864899 NA |
| ASV_16s_29021 | 0.074620237 | -0.309882998 | 3.55165351  | 0.327901363 | 0.999864899 NA |
| ASV_16s_29022 | 0.074620237 | -0.309882998 | 3.55165351  | 0.327901363 | 0.999864899 NA |
| ASV_16s_29023 | 0.074620237 | -0.309882998 | 3.55165351  | 0.327901363 | 0.999864899 NA |
| ASV_16s_29024 | 0.074620237 | -0.309882998 | 3.55165351  | 0.327901363 | 0.999864899 NA |
| ASV_16s_29025 | 0.074620237 | -0.309882998 | 3.55165351  | 0.327901363 | 0.999864899 NA |



|               |             |              |             |             |                |
|---------------|-------------|--------------|-------------|-------------|----------------|
| ASV_16s_29093 | 0.056401025 | -0.221777313 | 3.551775457 | 0.269578979 | 0.999930378 NA |
| ASV_16s_29094 | 0.056401025 | -0.221777313 | 3.551775457 | 0.269578979 | 0.999930378 NA |
| ASV_16s_29095 | 0.056401025 | -0.221777313 | 3.551775457 | 0.269578979 | 0.999930378 NA |
| ASV_16s_29096 | 0.056401025 | -0.221777313 | 3.551775457 | 0.269578979 | 0.999930378 NA |
| ASV_16s_29097 | 0.054881737 | -0.213753699 | 3.551783702 | 0.265423417 | 0.999933956 NA |
| ASV_16s_29098 | 0.053109233 | -0.204177285 | 3.551793683 | 0.260752673 | 0.999937823 NA |
| ASV_16s_29099 | 0.053109233 | -0.204177285 | 3.551793683 | 0.260752673 | 0.999937823 NA |
| ASV_16s_29100 | 0.053109233 | -0.204177285 | 3.551793683 | 0.260752673 | 0.999937823 NA |
| ASV_16s_29101 | 0.053109233 | -0.204177285 | 3.551793683 | 0.260752673 | 0.999937823 NA |
| ASV_16s_29102 | 0.053109233 | -0.204177285 | 3.551793683 | 0.260752673 | 0.999937823 NA |
| ASV_16s_29103 | 0.053109233 | -0.204177285 | 3.551793683 | 0.260752673 | 0.999937823 NA |
| ASV_16s_29104 | 0.053109233 | -0.204177285 | 3.551793683 | 0.260752673 | 0.999937823 NA |
| ASV_16s_29105 | 0.053109233 | -0.204177285 | 3.551793683 | 0.260752673 | 0.999937823 NA |
| ASV_16s_29106 | 0.053109233 | -0.204177285 | 3.551793683 | 0.260752673 | 0.999937823 NA |
| ASV_16s_29107 | 0.053109233 | -0.204177285 | 3.551793683 | 0.260752673 | 0.999937823 NA |
| ASV_16s_29108 | 0.053109233 | -0.204177285 | 3.551793683 | 0.260752673 | 0.999937823 NA |
| ASV_16s_29109 | 0.053109233 | -0.204177285 | 3.551793683 | 0.260752673 | 0.999937823 NA |
| ASV_16s_29110 | 0.053109233 | -0.204177285 | 3.551793683 | 0.260752673 | 0.999937823 NA |
| ASV_16s_29111 | 0.053109233 | -0.204177285 | 3.551793683 | 0.260752673 | 0.999937823 NA |
| ASV_16s_29112 | 0.053109233 | -0.204177285 | 3.551793683 | 0.260752673 | 0.999937823 NA |
| ASV_16s_29113 | 0.053109233 | -0.204177285 | 3.551793683 | 0.260752673 | 0.999937823 NA |
| ASV_16s_29114 | 0.053109233 | -0.204177285 | 3.551793683 | 0.260752673 | 0.999937823 NA |
| ASV_16s_29115 | 0.053109233 | -0.204177285 | 3.551793683 | 0.260752673 | 0.999937823 NA |
| ASV_16s_29116 | 0.053109233 | -0.204177285 | 3.551793683 | 0.260752673 | 0.999937823 NA |
| ASV_16s_29117 | 0.053109233 | -0.204177285 | 3.551793683 | 0.260752673 | 0.999937823 NA |
| ASV_16s_29118 | 0.053109233 | -0.204177285 | 3.551793683 | 0.260752673 | 0.999937823 NA |
| ASV_16s_29119 | 0.053109233 | -0.204177285 | 3.551793683 | 0.260752673 | 0.999937823 NA |
| ASV_16s_29120 | 0.053109233 | -0.204177285 | 3.551793683 | 0.260752673 | 0.999937823 NA |
| ASV_16s_29121 | 0.053109233 | -0.204177285 | 3.551793683 | 0.260752673 | 0.999937823 NA |
| ASV_16s_29122 | 0.053109233 | -0.204177285 | 3.551793683 | 0.260752673 | 0.999937823 NA |
| ASV_16s_29123 | 0.053109233 | -0.204177285 | 3.551793683 | 0.260752673 | 0.999937823 NA |
| ASV_16s_29124 | 0.053109233 | -0.204177285 | 3.551793683 | 0.260752673 | 0.999937823 NA |
| ASV_16s_29125 | 0.053109233 | -0.204177285 | 3.551793683 | 0.260752673 | 0.999937823 NA |
| ASV_16s_29126 | 0.053109233 | -0.204177285 | 3.551793683 | 0.260752673 | 0.999937823 NA |
| ASV_16s_29127 | 0.053109233 | -0.204177285 | 3.551793683 | 0.260752673 | 0.999937823 NA |
| ASV_16s_29128 | 0.053109233 | -0.204177285 | 3.551793683 | 0.260752673 | 0.999937823 NA |
| ASV_16s_29129 | 0.053109233 | -0.204177285 | 3.551793683 | 0.260752673 | 0.999937823 NA |
| ASV_16s_29130 | 0.053109233 | -0.204177285 | 3.551793683 | 0.260752673 | 0.999937823 NA |
| ASV_16s_29131 | 0.053109233 | -0.204177285 | 3.551793683 | 0.260752673 | 0.999937823 NA |
| ASV_16s_29132 | 0.053109233 | -0.204177285 | 3.551793683 | 0.260752673 | 0.999937823 NA |
| ASV_16s_29133 | 0.053109233 | -0.204177285 | 3.551793683 | 0.260752673 | 0.999937823 NA |
| ASV_16s_29134 | 0.053109233 | -0.204177285 | 3.551793683 | 0.260752673 | 0.999937823 NA |
| ASV_16s_29135 | 0.053109233 | -0.204177285 | 3.551793683 | 0.260752673 | 0.999937823 NA |
| ASV_16s_29136 | 0.053109233 | -0.204177285 | 3.551793683 | 0.260752673 | 0.999937823 NA |
| ASV_16s_29137 | 0.053109233 | -0.204177285 | 3.551793683 | 0.260752673 | 0.999937823 NA |
| ASV_16s_29138 | 0.053109233 | -0.204177285 | 3.551793683 | 0.260752673 | 0.999937823 NA |
| ASV_16s_29139 | 0.053109233 | -0.204177285 | 3.551793683 | 0.260752673 | 0.999937823 NA |
| ASV_16s_29140 | 0.053109233 | -0.204177285 | 3.551793683 | 0.260752673 | 0.999937823 NA |
| ASV_16s_29141 | 0.053109233 | -0.204177285 | 3.551793683 | 0.260752673 | 0.999937823 NA |
| ASV_16s_29142 | 0.080892584 | -0.337432688 | 3.55160395  | 0.351000399 | 0.999830075 NA |
| ASV_16s_29143 | 0.080892584 | -0.337432688 | 3.55160395  | 0.351000399 | 0.999830075 NA |
| ASV_16s_29144 | 0.016920941 | -0.078818483 | 3.55150579  | 0.022535823 | 0.999999987 NA |
| ASV_16s_29145 | 0.015597289 | -0.066074223 | 3.551530869 | 0.01382164  | 0.999999998 NA |
| ASV_16s_29146 | 0.015008999 | -0.05997579  | 3.55154243  | 0.010026934 | 0.999999999 NA |
| ASV_16s_29151 | 0.082825772 | 0.595611342  | 3.550882297 | 0.281793583 | 0.99991908 NA  |
| ASV_16s_29152 | 0.082825772 | 0.595611342  | 3.550882297 | 0.281793583 | 0.99991908 NA  |
| ASV_16s_29153 | 0.082825772 | 0.595611342  | 3.550882297 | 0.281793583 | 0.99991908 NA  |
| ASV_16s_29154 | 0.03757958  | 0.5946389    | 3.55123077  | 0.110298085 | 0.999996756 NA |
| ASV_16s_29155 | 0.074620237 | 0.686123703  | 3.551439826 | 0.391395686 | 0.999755056 NA |
| ASV_16s_29156 | 0.074620237 | 0.686123703  | 3.551439826 | 0.391395686 | 0.999755056 NA |
| ASV_16s_29157 | 0.062072499 | -0.257967177 | 3.551796825 | 0.192379816 | 0.999977977 NA |
| ASV_16s_29158 | 0.0827247   | -0.117806147 | 3.551874784 | 0.212527228 | 0.999969034 NA |
| ASV_16s_29159 | 0.087575021 | -0.31806739  | 3.55171797  | 0.312482212 | 0.999885176 NA |
| ASV_16s_29160 | 0.060434749 | 0.061709588  | 3.551889287 | 0.219071069 | 0.999965654 NA |
| ASV_16s_29161 | 0.054248608 | 0.173375698  | 3.551975085 | 0.194715981 | 0.999977047 NA |
| ASV_16s_29162 | 0.0681864   | 0.152988384  | 3.551882126 | 0.265730153 | 0.999933697 NA |
| ASV_16s_29163 | 0.069579428 | -0.327532028 | 3.551748993 | 0.219360627 | 0.999965498 NA |



|               |             |              |             |             |                |
|---------------|-------------|--------------|-------------|-------------|----------------|
| ASV_16s_29164 | 0.064631243 | 0.152988385  | 3.551882126 | 0.257728809 | 0.999940241 NA |
| ASV_16s_29165 | 0.06168997  | 0.316799606  | 3.552005962 | 0.170936689 | 0.999985316 NA |
| ASV_16s_29166 | 0.084707489 | 0.614194319  | 3.551853613 | 0.386167845 | 0.999765845 NA |
| ASV_16s_29167 | 0.064464855 | 0.591493536  | 3.55198612  | 0.262274737 | 0.999936581 NA |
| ASV_16s_29168 | 0.065783065 | -0.022390536 | 3.551900899 | 0.255252129 | 0.999942171 NA |
| ASV_16s_29169 | 0.064106848 | -0.320984327 | 3.551716719 | 0.211518931 | 0.999969533 NA |
| ASV_16s_29170 | 0.057881946 | 0.245236856  | 3.551895413 | 0.223618886 | 0.999963158 NA |
| ASV_16s_29171 | 0.074753512 | 0.26372806   | 3.551772233 | 0.339308759 | 0.999848391 NA |
| ASV_16s_29172 | 0.077694514 | 0.848564505  | 3.551817843 | 0.296577388 | 0.999903773 NA |
| ASV_16s_29173 | 0.062641533 | 0.172029787  | 3.551968588 | 0.18144399  | 0.99998198 NA  |
| ASV_16s_29174 | 0.07021387  | 0.019053289  | 3.551862028 | 0.283458144 | 0.999917448 NA |
| ASV_16s_29175 | 0.070933245 | 0.019053289  | 3.551862028 | 0.286615757 | 0.999914289 NA |
| ASV_16s_29176 | 0.066500818 | 0.019053289  | 3.551862028 | 0.274451103 | 0.999926013 NA |
| ASV_16s_29177 | 0.066500818 | 0.019053289  | 3.551862028 | 0.274451103 | 0.999926013 NA |
| ASV_16s_29178 | 0.056609478 | 0.314954586  | 3.551871116 | 0.229881683 | 0.999959516 NA |
| ASV_16s_29179 | 0.070665255 | 0.331303885  | 3.551939031 | 0.279764911 | 0.999921039 NA |
| ASV_16s_29180 | 0.075488194 | 0.064244365  | 3.551802207 | 0.308758063 | 0.999889736 NA |
| ASV_16s_29181 | 0.068713747 | 0.064244464  | 3.551802209 | 0.293931798 | 0.999906649 NA |
| ASV_16s_29182 | 0.075187956 | 0.218644706  | 3.551973587 | 0.235120426 | 0.999956283 NA |
| ASV_16s_29183 | 0.066281544 | 0.091532309  | 3.551838797 | 0.342910907 | 0.999842901 NA |
| ASV_16s_29184 | 0.059047615 | 0.447608721  | 3.551954758 | 0.193890036 | 0.999977379 NA |
| ASV_16s_29185 | 0.068325115 | 0.110987243  | 3.551744699 | 0.309250212 | 0.999889141 NA |
| ASV_16s_29186 | 0.062496314 | 0.117212923  | 3.551844422 | 0.283244603 | 0.999917659 NA |
| ASV_16s_29187 | 0.062496314 | 0.117212923  | 3.551844422 | 0.283244603 | 0.999917659 NA |
| ASV_16s_29188 | 0.04831582  | 0.351609967  | 3.551893988 | 0.273045971 | 0.999927291 NA |
| ASV_16s_29189 | 0.066403812 | 0.111076361  | 3.551746408 | 0.305362121 | 0.999893784 NA |
| ASV_16s_29190 | 0.063425131 | 0.567557361  | 3.551760245 | 0.15517447  | 0.999989469 NA |
| ASV_16s_29191 | 0.059940869 | 0.423775987  | 3.551815599 | 0.284515277 | 0.9999164 NA   |
| ASV_16s_29192 | 0.10056651  | 0.491268575  | 3.551558886 | 0.505200526 | 0.999427215 NA |
| ASV_16s_29193 | 0.061002185 | -0.052868618 | 3.55171101  | 0.295324078 | 0.999905143 NA |
| ASV_16s_29194 | 0.069670585 | 0.819165475  | 3.551850722 | 0.274897524 | 0.999925604 NA |
| ASV_16s_29195 | 0.069670585 | 0.819165475  | 3.551850722 | 0.274897524 | 0.999925604 NA |
| ASV_16s_29196 | 0.069670585 | 0.819165475  | 3.551850722 | 0.274897524 | 0.999925604 NA |
| ASV_16s_29197 | 0.069670585 | 0.819165475  | 3.551850722 | 0.274897524 | 0.999925604 NA |
| ASV_16s_29198 | 0.069670585 | 0.819165475  | 3.551850722 | 0.274897524 | 0.999925604 NA |
| ASV_16s_29199 | 0.069670585 | 0.819165475  | 3.551850722 | 0.274897524 | 0.999925604 NA |
| ASV_16s_29200 | 0.069670585 | 0.819165475  | 3.551850722 | 0.274897524 | 0.999925604 NA |
| ASV_16s_29201 | 0.073394888 | 0.175045559  | 3.551776049 | 0.178040969 | 0.999983113 NA |
| ASV_16s_29202 | 0.119301092 | 0.300803448  | 3.551943274 | 0.485922911 | 0.999496411 NA |
| ASV_16s_29203 | 0.090619898 | 0.655213274  | 3.551907346 | 0.228667612 | 0.999960241 NA |
| ASV_16s_29204 | 0.073819779 | 0.87367353   | 3.551794417 | 0.286971092 | 0.999913929 NA |
| ASV_16s_29205 | 0.073819779 | 0.87367353   | 3.551794417 | 0.286971092 | 0.999913929 NA |
| ASV_16s_29206 | 0.073819779 | 0.87367353   | 3.551794417 | 0.286971092 | 0.999913929 NA |
| ASV_16s_29207 | 0.073819779 | 0.87367353   | 3.551794417 | 0.286971092 | 0.999913929 NA |
| ASV_16s_29208 | 0.076323419 | 0.884138446  | 3.551774809 | 0.293908206 | 0.999906674 NA |
| ASV_16s_29209 | 0.058797123 | 0.806865164  | 3.551886295 | 0.250102512 | 0.999946045 NA |
| ASV_16s_29210 | 0.058797123 | 0.806865164  | 3.551886295 | 0.250102512 | 0.999946045 NA |
| ASV_16s_29211 | 0.058797123 | 0.806865164  | 3.551886295 | 0.250102512 | 0.999946045 NA |
| ASV_16s_29212 | 0.058797123 | 0.806865164  | 3.551886295 | 0.250102512 | 0.999946045 NA |
| ASV_16s_29213 | 0.058797123 | 0.806865164  | 3.551886295 | 0.250102512 | 0.999946045 NA |
| ASV_16s_29214 | 0.066160019 | 0.840946068  | 3.551845527 | 0.267093614 | 0.999932534 NA |
| ASV_16s_29215 | 0.066160019 | 0.840946068  | 3.551845527 | 0.267093614 | 0.999932534 NA |
| ASV_16s_29216 | 0.066160019 | 0.840946068  | 3.551845527 | 0.267093614 | 0.999932534 NA |
| ASV_16s_29217 | 0.066160019 | 0.840946068  | 3.551845527 | 0.267093614 | 0.999932534 NA |
| ASV_16s_29218 | 0.066160019 | 0.840946068  | 3.551845527 | 0.267093614 | 0.999932534 NA |
| ASV_16s_29219 | 0.084434116 | 0.917427187  | 3.551703267 | 0.317694173 | 0.999878577 NA |
| ASV_16s_29220 | 0.060701733 | 0.816070564  | 3.551876146 | 0.254282824 | 0.999942915 NA |
| ASV_16s_29221 | 0.060701733 | 0.816070564  | 3.551876146 | 0.254282824 | 0.999942915 NA |
| ASV_16s_29222 | 0.060701733 | 0.816070564  | 3.551876146 | 0.254282824 | 0.999942915 NA |
| ASV_16s_29223 | 0.060701733 | 0.816070564  | 3.551876146 | 0.254282824 | 0.999942915 NA |
| ASV_16s_29224 | 0.060701733 | 0.816070564  | 3.551876146 | 0.254282824 | 0.999942915 NA |
| ASV_16s_29225 | 0.060701733 | 0.816070564  | 3.551876146 | 0.254282824 | 0.999942915 NA |
| ASV_16s_29226 | 0.060701733 | 0.816070564  | 3.551876146 | 0.254282824 | 0.999942915 NA |
| ASV_16s_29227 | 0.060701733 | 0.816070564  | 3.551876146 | 0.254282824 | 0.999942915 NA |
| ASV_16s_29228 | 0.060701733 | 0.816070564  | 3.551876146 | 0.254282824 | 0.999942915 NA |
| ASV_16s_29229 | 0.073244321 | 0.865053102  | 3.551809147 | 0.285591351 | 0.999915323 NA |
| ASV_16s_29230 | 0.095917656 | 0.961145706  | 3.551606716 | 0.354417316 | 0.999824446 NA |

|               |             |              |             |             |                |
|---------------|-------------|--------------|-------------|-------------|----------------|
| ASV_16s_29231 | 0.057549414 | 0.325318841  | 3.55204273  | 0.263381617 | 0.999935667 NA |
| ASV_16s_29232 | 0.057549414 | 0.325318841  | 3.55204273  | 0.263381617 | 0.999935667 NA |
| ASV_16s_29233 | 0.057549414 | 0.325318841  | 3.55204273  | 0.263381617 | 0.999935667 NA |
| ASV_16s_29234 | 0.057549414 | 0.325318841  | 3.55204273  | 0.263381617 | 0.999935667 NA |
| ASV_16s_29235 | 0.069670585 | 0.325035772  | 3.552035424 | 0.299655707 | 0.999900351 NA |
| ASV_16s_29236 | 0.069670585 | 0.325035772  | 3.552035424 | 0.299655707 | 0.999900351 NA |
| ASV_16s_29237 | 0.069670585 | 0.325035772  | 3.552035424 | 0.299655707 | 0.999900351 NA |
| ASV_16s_29238 | 0.069670585 | 0.325035772  | 3.552035424 | 0.299655707 | 0.999900351 NA |
| ASV_16s_29239 | 0.064023811 | 0.339305099  | 3.551969598 | 0.147218586 | 0.999991214 NA |
| ASV_16s_29240 | 0.077058654 | 0.325970797  | 3.552024661 | 0.324582819 | 0.999869457 NA |
| ASV_16s_29241 | 0.077058654 | 0.325970797  | 3.552024661 | 0.324582819 | 0.999869457 NA |
| ASV_16s_29242 | 0.077058654 | 0.325970797  | 3.552024661 | 0.324582819 | 0.999869457 NA |
| ASV_16s_29243 | 0.077058654 | 0.325970797  | 3.552024661 | 0.324582819 | 0.999869457 NA |
| ASV_16s_29244 | 0.100940913 | 0.329461077  | 3.551995597 | 0.415014574 | 0.999702027 NA |
| ASV_16s_29245 | 0.100940913 | 0.329461077  | 3.551995597 | 0.415014574 | 0.999702027 NA |
| ASV_16s_29246 | 0.100940913 | 0.329461077  | 3.551995597 | 0.415014574 | 0.999702027 NA |
| ASV_16s_29247 | 0.044597359 | 0.324418876  | 3.552038671 | 0.232752861 | 0.999957766 NA |
| ASV_16s_29248 | 0.044597359 | 0.324418876  | 3.552038671 | 0.232752861 | 0.999957766 NA |
| ASV_16s_29249 | 0.044597359 | 0.324418876  | 3.552038671 | 0.232752861 | 0.999957766 NA |
| ASV_16s_29250 | 0.074547048 | -0.051986177 | 3.551851073 | 0.181833086 | 0.999981847 NA |
| ASV_16s_29251 | 0.060385819 | 0.325162959  | 3.552041458 | 0.271267399 | 0.999928886 NA |
| ASV_16s_29252 | 0.060385819 | 0.325162959  | 3.552041458 | 0.271267399 | 0.999928886 NA |
| ASV_16s_29253 | 0.060385819 | 0.325162959  | 3.552041458 | 0.271267399 | 0.999928886 NA |
| ASV_16s_29254 | 0.081057925 | 0.326823502  | 3.552016916 | 0.338823077 | 0.999849121 NA |
| ASV_16s_29255 | 0.081057925 | 0.326823502  | 3.552016916 | 0.338823077 | 0.999849121 NA |
| ASV_16s_29256 | 0.081057925 | 0.326823502  | 3.552016916 | 0.338823077 | 0.999849121 NA |
| ASV_16s_29257 | 0.071860646 | 0.322501469  | 3.551952723 | 0.269104366 | 0.999930793 NA |
| ASV_16s_29258 | 0.10470547  | 0.329461077  | 3.551995597 | 0.429655748 | 0.999665477 NA |
| ASV_16s_29259 | 0.053587432 | -0.017934886 | 3.551881282 | 0.159845735 | 0.999988339 NA |
| ASV_16s_29260 | 0.102853684 | 0.329461077  | 3.551995597 | 0.422456349 | 0.999683812 NA |
| ASV_16s_29261 | 0.071787341 | 0.32516673   | 3.552033146 | 0.306608869 | 0.99989231 NA  |
| ASV_16s_29262 | 0.089491249 | -0.305725659 | 3.551647815 | 0.198192608 | 0.999975613 NA |
| ASV_16s_29263 | 0.077628151 | -0.308976278 | 3.551738579 | 0.332982807 | 0.999857708 NA |
| ASV_16s_29264 | 0.077628151 | -0.308976278 | 3.551738579 | 0.332982807 | 0.999857708 NA |
| ASV_16s_29265 | 0.074620237 | -0.297406752 | 3.551762243 | 0.322386343 | 0.999872415 NA |
| ASV_16s_29266 | 0.074620237 | -0.297406752 | 3.551762243 | 0.322386343 | 0.999872415 NA |
| ASV_16s_29267 | 0.074620237 | -0.297406752 | 3.551762243 | 0.322386343 | 0.999872415 NA |
| ASV_16s_29268 | 0.074620237 | -0.297406752 | 3.551762243 | 0.322386343 | 0.999872415 NA |
| ASV_16s_29269 | 0.074620237 | -0.297406752 | 3.551762243 | 0.322386343 | 0.999872415 NA |
| ASV_16s_29270 | 0.119056826 | -0.303070171 | 3.55185044  | 0.308323781 | 0.99989026 NA  |
| ASV_16s_29271 | 0.064116421 | -0.252765217 | 3.5518247   | 0.287882317 | 0.999912999 NA |
| ASV_16s_29272 | 0.064116421 | -0.252765217 | 3.5518247   | 0.287882317 | 0.999912999 NA |
| ASV_16s_29273 | 0.064116421 | -0.252765217 | 3.5518247   | 0.287882317 | 0.999912999 NA |
| ASV_16s_29274 | 0.064116421 | -0.252765217 | 3.5518247   | 0.287882317 | 0.999912999 NA |
| ASV_16s_29275 | 0.082978818 | -0.320792589 | 3.551713374 | 0.352526261 | 0.999827577 NA |
| ASV_16s_29276 | 0.044539882 | -0.149470774 | 3.551910064 | 0.238001337 | 0.99995443 NA  |
| ASV_16s_29277 | 0.044539882 | -0.149470774 | 3.551910064 | 0.238001337 | 0.99995443 NA  |
| ASV_16s_29278 | 0.044539882 | -0.149470774 | 3.551910064 | 0.238001337 | 0.99995443 NA  |
| ASV_16s_29279 | 0.065522278 | -0.259150629 | 3.551817026 | 0.292244905 | 0.999908451 NA |
| ASV_16s_29280 | 0.065522278 | -0.259150629 | 3.551817026 | 0.292244905 | 0.999908451 NA |
| ASV_16s_29281 | 0.065522278 | -0.259150629 | 3.551817026 | 0.292244905 | 0.999908451 NA |
| ASV_16s_29282 | 0.061633293 | -0.241098525 | 3.551838274 | 0.280384438 | 0.999920445 NA |
| ASV_16s_29283 | 0.058299878 | -0.224460194 | 3.55185553  | 0.270775535 | 0.999929323 NA |
| ASV_16s_29284 | 0.058299878 | -0.224460194 | 3.55185553  | 0.270775535 | 0.999929323 NA |
| ASV_16s_29285 | 0.058299878 | -0.224460194 | 3.55185553  | 0.270775535 | 0.999929323 NA |
| ASV_16s_29286 | 0.066965359 | -0.001246674 | 3.551944859 | 0.170821195 | 0.99998535 NA  |
| ASV_16s_29287 | 0.070361746 | -0.305365382 | 3.551693981 | 0.155669068 | 0.999989353 NA |
| ASV_16s_29288 | 0.086538461 | 0.925664426  | 3.551685955 | 0.324168429 | 0.999870019 NA |
| ASV_16s_29289 | 0.086538461 | 0.925664426  | 3.551685955 | 0.324168429 | 0.999870019 NA |
| ASV_16s_29290 | 0.080329244 | 0.900843312  | 3.55173888  | 0.305434272 | 0.999893699 NA |
| ASV_16s_29291 | 0.080329244 | 0.900843312  | 3.55173888  | 0.305434272 | 0.999893699 NA |
| ASV_16s_29292 | 0.080329244 | 0.900843312  | 3.55173888  | 0.305434272 | 0.999893699 NA |
| ASV_16s_29293 | 0.080329244 | 0.900843312  | 3.55173888  | 0.305434272 | 0.999893699 NA |
| ASV_16s_29294 | 0.08787734  | 0.930815509  | 3.551675255 | 0.328350839 | 0.999864274 NA |
| ASV_16s_29295 | 0.08787734  | 0.930815509  | 3.551675255 | 0.328350839 | 0.999864274 NA |
| ASV_16s_29296 | 0.08787734  | 0.930815509  | 3.551675255 | 0.328350839 | 0.999864274 NA |
| ASV_16s_29297 | 0.08787734  | 0.930815509  | 3.551675255 | 0.328350839 | 0.999864274 NA |

|               |             |              |             |             |                |
|---------------|-------------|--------------|-------------|-------------|----------------|
| ASV_16s_29298 | 0.066036017 | 0.893431109  | 3.551626222 | 0.213352706 | 0.999968621 NA |
| ASV_16s_29299 | 0.066036017 | 0.893431109  | 3.551626222 | 0.213352706 | 0.999968621 NA |
| ASV_16s_29300 | 0.066036017 | 0.893431109  | 3.551626222 | 0.213352706 | 0.999968621 NA |
| ASV_16s_29301 | 0.066036017 | 0.893431109  | 3.551626222 | 0.213352706 | 0.999968621 NA |
| ASV_16s_29302 | 0.066036017 | 0.893431109  | 3.551626222 | 0.213352706 | 0.999968621 NA |
| ASV_16s_29303 | 0.066036017 | 0.893431109  | 3.551626222 | 0.213352706 | 0.999968621 NA |
| ASV_16s_29304 | 0.066036017 | 0.893431109  | 3.551626222 | 0.213352706 | 0.999968621 NA |
| ASV_16s_29305 | 0.066036017 | 0.893431109  | 3.551626222 | 0.213352706 | 0.999968621 NA |
| ASV_16s_29306 | 0.067639684 | 0.946579235  | 3.551787699 | 0.162641804 | 0.999987622 NA |
| ASV_16s_29307 | 0.034464439 | 0.726427758  | 3.551852072 | 0.138689053 | 0.999992847 NA |
| ASV_16s_29308 | 0.09472744  | 1.003076818  | 3.551380405 | 0.294153895 | 0.99990641 NA  |
| ASV_16s_29309 | 0.042712321 | 0.777933056  | 3.551810829 | 0.170794323 | 0.999985358 NA |
| ASV_16s_29310 | 0.042712321 | 0.777933056  | 3.551810829 | 0.170794323 | 0.999985358 NA |
| ASV_16s_29311 | 0.042712321 | 0.777933056  | 3.551810829 | 0.170794323 | 0.999985358 NA |
| ASV_16s_29312 | 0.05908419  | 0.862414926  | 3.551686411 | 0.198551901 | 0.999975462 NA |
| ASV_16s_29313 | 0.05908419  | 0.862414926  | 3.551686411 | 0.198551901 | 0.999975462 NA |
| ASV_16s_29314 | 0.05908419  | 0.862414926  | 3.551686411 | 0.198551901 | 0.999975462 NA |
| ASV_16s_29315 | 0.05908419  | 0.862414926  | 3.551686411 | 0.198551901 | 0.999975462 NA |
| ASV_16s_29316 | 0.08143392  | 0.955804449  | 3.551489044 | 0.253412812 | 0.999943576 NA |
| ASV_16s_29317 | 0.069306454 | 0.342687209  | 3.551794636 | 0.24144083  | 0.999952147 NA |
| ASV_16s_29318 | 0.074683955 | 0.343003951  | 3.551777561 | 0.258491092 | 0.999939637 NA |
| ASV_16s_29319 | 0.074683955 | 0.343003951  | 3.551777561 | 0.258491092 | 0.999939637 NA |
| ASV_16s_29320 | 0.067749901 | 0.34259242   | 3.551799857 | 0.236739631 | 0.999955248 NA |
| ASV_16s_29321 | 0.067749901 | 0.34259242   | 3.551799857 | 0.236739631 | 0.999955248 NA |
| ASV_16s_29322 | 0.061514133 | 0.342198148  | 3.551822132 | 0.219075822 | 0.999965651 NA |
| ASV_16s_29323 | 0.061514133 | 0.342198148  | 3.551822132 | 0.219075822 | 0.999965651 NA |
| ASV_16s_29324 | 0.061514133 | 0.342198148  | 3.551822132 | 0.219075822 | 0.999965651 NA |
| ASV_16s_29325 | 0.054908015 | 0.096330648  | 3.55191537  | 0.172234147 | 0.999984929 NA |
| ASV_16s_29326 | 0.086987076 | 0.343204137  | 3.551767058 | 0.300635366 | 0.999899244 NA |
| ASV_16s_29327 | 0.086987076 | 0.343204137  | 3.551767058 | 0.300635366 | 0.999899244 NA |
| ASV_16s_29328 | 0.054941284 | 0.341761055  | 3.551847917 | 0.202709626 | 0.999973658 NA |
| ASV_16s_29329 | 0.106052998 | 0.343204137  | 3.551767058 | 0.366173072 | 0.999804097 NA |
| ASV_16s_29330 | 0.106052998 | 0.343204137  | 3.551767058 | 0.366173072 | 0.999804097 NA |
| ASV_16s_29331 | 0.019130087 | 0.331039426  | 3.551980805 | 0.089531105 | 0.999998424 NA |
| ASV_16s_29332 | 0.077075086 | 0.343141458  | 3.551770323 | 0.266445453 | 0.999933088 NA |
| ASV_16s_29333 | 0.077075086 | 0.343141458  | 3.551770323 | 0.266445453 | 0.999933088 NA |
| ASV_16s_29334 | 0.069670585 | -0.303574159 | 3.551481255 | 0.244070481 | 0.999950348 NA |
| ASV_16s_29335 | 0.069670585 | -0.303574159 | 3.551481255 | 0.244070481 | 0.999950348 NA |
| ASV_16s_29336 | 0.075722577 | -0.316206087 | 3.551459534 | 0.263987181 | 0.999935163 NA |
| ASV_16s_29337 | 0.075722577 | -0.316206087 | 3.551459534 | 0.263987181 | 0.999935163 NA |
| ASV_16s_29338 | 0.075722577 | -0.316206087 | 3.551459534 | 0.263987181 | 0.999935163 NA |
| ASV_16s_29339 | 0.075722577 | -0.316206087 | 3.551459534 | 0.263987181 | 0.999935163 NA |
| ASV_16s_29340 | 0.075722577 | -0.316206087 | 3.551459534 | 0.263987181 | 0.999935163 NA |
| ASV_16s_29341 | 0.075722577 | -0.316206087 | 3.551459534 | 0.263987181 | 0.999935163 NA |
| ASV_16s_29342 | 0.075722577 | -0.316206087 | 3.551459534 | 0.263987181 | 0.999935163 NA |
| ASV_16s_29343 | 0.075722577 | -0.316206087 | 3.551459534 | 0.263987181 | 0.999935163 NA |
| ASV_16s_29344 | 0.075722577 | -0.316206087 | 3.551459534 | 0.263987181 | 0.999935163 NA |
| ASV_16s_29345 | 0.072661091 | 0.184447079  | 3.551546205 | 0.298120093 | 0.999902068 NA |
| ASV_16s_29346 | 0.097677474 | -0.316206087 | 3.551459534 | 0.336789781 | 0.99985215 NA  |
| ASV_16s_29347 | 0.100172228 | -0.316206088 | 3.551459534 | 0.345011559 | 0.999839637 NA |
| ASV_16s_29348 | 0.105785424 | -0.316206087 | 3.551459534 | 0.36351056  | 0.999808841 NA |
| ASV_16s_29349 | 0.100818288 | -0.316206087 | 3.551459534 | 0.347151253 | 0.999836265 NA |
| ASV_16s_29350 | 0.100818288 | -0.316206087 | 3.551459534 | 0.347151253 | 0.999836265 NA |
| ASV_16s_29351 | 0.100818288 | -0.316206087 | 3.551459534 | 0.347151253 | 0.999836265 NA |
| ASV_16s_29352 | 0.093265604 | -0.316206087 | 3.551459534 | 0.322212595 | 0.999872647 NA |
| ASV_16s_29353 | 0.093265604 | -0.316206087 | 3.551459534 | 0.322212595 | 0.999872647 NA |
| ASV_16s_29354 | 0.037488848 | -0.13950063  | 3.551703245 | 0.171694097 | 0.999985091 NA |
| ASV_16s_29355 | 0.037488848 | -0.13950063  | 3.551703245 | 0.171694097 | 0.999985091 NA |
| ASV_16s_29356 | 0.037488848 | -0.13950063  | 3.551703245 | 0.171694097 | 0.999985091 NA |
| ASV_16s_29357 | 0.034357723 | -0.118717923 | 3.551729027 | 0.15839232  | 0.999988699 NA |
| ASV_16s_29358 | 0.034357723 | -0.118717923 | 3.551729027 | 0.15839232  | 0.999988699 NA |
| ASV_16s_29359 | 0.034357723 | -0.118717923 | 3.551729027 | 0.15839232  | 0.999988699 NA |
| ASV_16s_29360 | 0.061514133 | -0.267943784 | 3.551536931 | 0.219666631 | 0.999965334 NA |
| ASV_16s_29361 | 0.061514133 | -0.267943784 | 3.551536931 | 0.219666631 | 0.999965334 NA |
| ASV_16s_29362 | 0.07725151  | 0.939729485  | 3.551525127 | 0.241665681 | 0.999951995 NA |
| ASV_16s_29363 | 0.07725151  | 0.939729485  | 3.551525127 | 0.241665681 | 0.999951995 NA |
| ASV_16s_29364 | 0.07725151  | 0.939729485  | 3.551525127 | 0.241665681 | 0.999951995 NA |



|               |             |              |             |             |                |
|---------------|-------------|--------------|-------------|-------------|----------------|
| ASV_16s_29432 | 0.034377139 | 0.230678081  | 3.551306875 | 0.1200026   | 0.999995658 NA |
| ASV_16s_29433 | 0.034377139 | 0.230678081  | 3.551306875 | 0.1200026   | 0.999995658 NA |
| ASV_16s_29434 | 0.036144417 | 0.229561815  | 3.551280947 | 0.129220321 | 0.999994395 NA |
| ASV_16s_29435 | 0.037971679 | 0.228462906  | 3.551256529 | 0.139960009 | 0.999992618 NA |
| ASV_16s_29436 | 0.039050041 | 0.227838623  | 3.551243128 | 0.147182975 | 0.999991221 NA |
| ASV_16s_29437 | 0.039050041 | 0.227838623  | 3.551243128 | 0.147182975 | 0.999991221 NA |
| ASV_16s_29438 | 0.039050041 | 0.227838623  | 3.551243128 | 0.147182975 | 0.999991221 NA |
| ASV_16s_29439 | 0.039050041 | 0.227838623  | 3.551243128 | 0.147182975 | 0.999991221 NA |
| ASV_16s_29440 | 0.039020049 | 0.227855735  | 3.551243491 | 0.147092032 | 0.99999124 NA  |
| ASV_16s_29441 | 0.038972061 | 0.227883162  | 3.551244073 | 0.146946752 | 0.99999127 NA  |
| ASV_16s_29442 | 0.038972061 | 0.227883162  | 3.551244073 | 0.146946752 | 0.99999127 NA  |
| ASV_16s_29443 | 0.038972061 | 0.227883162  | 3.551244073 | 0.146946752 | 0.99999127 NA  |
| ASV_16s_29444 | 0.038972061 | 0.227883162  | 3.551244073 | 0.146946752 | 0.99999127 NA  |
| ASV_16s_29445 | 0.038972061 | 0.227883162  | 3.551244073 | 0.146946752 | 0.99999127 NA  |
| ASV_16s_29446 | 0.038972061 | 0.227883162  | 3.551244073 | 0.146946752 | 0.99999127 NA  |
| ASV_16s_29447 | 0.06278589  | 0.312902905  | 3.551603988 | 0.379218605 | 0.999779674 NA |
| ASV_16s_29448 | 0.06278589  | 0.312902905  | 3.551603988 | 0.379218605 | 0.999779674 NA |
| ASV_16s_29449 | 0.065032717 | 0.31213365   | 3.551576733 | 0.389368179 | 0.99975928 NA  |
| ASV_16s_29450 | 0.06664794  | 0.311596415  | 3.551558207 | 0.396775934 | 0.9997436 NA   |
| ASV_16s_29451 | 0.06664794  | 0.311596415  | 3.551558207 | 0.396775934 | 0.9997436 NA   |
| ASV_16s_29452 | 0.06664794  | 0.311596415  | 3.551558207 | 0.396775934 | 0.9997436 NA   |
| ASV_16s_29453 | 0.06664794  | 0.311596415  | 3.551558207 | 0.396775934 | 0.9997436 NA   |
| ASV_16s_29454 | 0.06664794  | 0.311596415  | 3.551558207 | 0.396775934 | 0.9997436 NA   |
| ASV_16s_29455 | 0.06664794  | 0.311596415  | 3.551558207 | 0.396775934 | 0.9997436 NA   |
| ASV_16s_29456 | 0.06664794  | 0.311596415  | 3.551558207 | 0.396775934 | 0.9997436 NA   |
| ASV_16s_29457 | 0.06664794  | 0.311596415  | 3.551558207 | 0.396775934 | 0.9997436 NA   |
| ASV_16s_29458 | 0.06664794  | 0.311596415  | 3.551558207 | 0.396775934 | 0.9997436 NA   |
| ASV_16s_29459 | 0.06664794  | 0.311596415  | 3.551558207 | 0.396775934 | 0.9997436 NA   |
| ASV_16s_29460 | 0.06664794  | 0.311596415  | 3.551558207 | 0.396775934 | 0.9997436 NA   |
| ASV_16s_29461 | 0.06664794  | 0.311596415  | 3.551558207 | 0.396775934 | 0.9997436 NA   |
| ASV_16s_29462 | 0.06664794  | 0.311596415  | 3.551558207 | 0.396775934 | 0.9997436 NA   |
| ASV_16s_29463 | 0.06664794  | 0.311596415  | 3.551558207 | 0.396775934 | 0.9997436 NA   |
| ASV_16s_29464 | 0.06664794  | 0.311596415  | 3.551558207 | 0.396775934 | 0.9997436 NA   |
| ASV_16s_29465 | 0.066566803 | 0.311623091  | 3.551559118 | 0.396401894 | 0.999744408 NA |
| ASV_16s_29466 | 0.067772967 | 0.311229786  | 3.551545799 | 0.401983857 | 0.999732165 NA |
| ASV_16s_29467 | 0.067772967 | 0.311229786  | 3.551545799 | 0.401983857 | 0.999732165 NA |
| ASV_16s_29468 | 0.067772967 | 0.311229786  | 3.551545799 | 0.401983857 | 0.999732165 NA |
| ASV_16s_29469 | 0.067772967 | 0.311229786  | 3.551545799 | 0.401983857 | 0.999732165 NA |
| ASV_16s_29470 | 0.067772967 | 0.311229786  | 3.551545799 | 0.401983857 | 0.999732165 NA |
| ASV_16s_29471 | 0.067772967 | 0.311229786  | 3.551545799 | 0.401983857 | 0.999732165 NA |
| ASV_16s_29472 | 0.058113979 | 0.314592984  | 3.551667004 | 0.358717884 | 0.99981718 NA  |
| ASV_16s_29473 | 0.066436984 | 0.311665838  | 3.551560578 | 0.395803898 | 0.999745696 NA |
| ASV_16s_29474 | 0.066436984 | 0.311665838  | 3.551560578 | 0.395803898 | 0.999745696 NA |
| ASV_16s_29475 | 0.066436984 | 0.311665838  | 3.551560578 | 0.395803898 | 0.999745696 NA |
| ASV_16s_29476 | 0.066436984 | 0.311665838  | 3.551560578 | 0.395803898 | 0.999745696 NA |
| ASV_16s_29477 | 0.066436984 | 0.311665838  | 3.551560578 | 0.395803898 | 0.999745696 NA |
| ASV_16s_29478 | 0.066436984 | 0.311665838  | 3.551560578 | 0.395803898 | 0.999745696 NA |
| ASV_16s_29479 | 0.066436984 | 0.311665838  | 3.551560578 | 0.395803898 | 0.999745696 NA |
| ASV_16s_29480 | 0.041136137 | 0.594782935  | 3.551187586 | 0.129532422 | 0.999994348 NA |
| ASV_16s_29481 | 0.059609687 | 0.685448898  | 3.551654576 | 0.335317478 | 0.999854317 NA |
| ASV_16s_29482 | 0.069510628 | 0.685924727  | 3.551503945 | 0.371494865 | 0.999794373 NA |
| ASV_16s_29483 | 0.069510628 | 0.685924727  | 3.551503945 | 0.371494865 | 0.999794373 NA |
| ASV_16s_29484 | 0.069510628 | 0.685924727  | 3.551503945 | 0.371494865 | 0.999794373 NA |
| ASV_16s_29485 | 0.053444838 | -0.054618541 | 3.551633826 | 0.322537259 | 0.999872213 NA |
| ASV_16s_29486 | 0.081108704 | 0.341564151  | 3.551933222 | 0.213258419 | 0.999968668 NA |
| ASV_16s_29487 | 0.064624339 | 0.388494223  | 3.551512385 | 0.435305235 | 0.999650589 NA |
| ASV_16s_29488 | 0.071116237 | 0.959652903  | 3.551792801 | 0.18308074  | 0.999981416 NA |
| ASV_16s_29489 | 0.063598582 | 0.071286652  | 3.551828072 | 0.324325453 | 0.999869806 NA |
| ASV_16s_29490 | 0.055922429 | 0.045664318  | 3.551859587 | 0.32279393  | 0.99987187 NA  |
| ASV_16s_29491 | 0.063299293 | 0.610064827  | 3.551785684 | 0.229899736 | 0.999959505 NA |
| ASV_16s_29492 | 0.041395915 | 0.485789167  | 3.551970865 | 0.168563902 | 0.999986004 NA |
| ASV_16s_29493 | 0.046487095 | 0.547635858  | 3.551964029 | 0.267312171 | 0.999932346 NA |
| ASV_16s_29494 | 0.056913466 | 0.147115681  | 3.551879354 | 0.336512623 | 0.99985256 NA  |
| ASV_16s_29495 | 0.060991033 | 0.652344053  | 3.551798295 | 0.311964586 | 0.999885818 NA |
| ASV_16s_29496 | 0.072060975 | 0.828096218  | 3.551841776 | 0.28114358  | 0.999919712 NA |
| ASV_16s_29497 | 0.130205356 | 0.937745779  | 3.551667006 | 0.469942533 | 0.999549267 NA |
| ASV_16s_29498 | 0.080329244 | 0.30296861   | 3.551952263 | 0.335597613 | 0.999853906 NA |

|               |             |              |             |             |                |
|---------------|-------------|--------------|-------------|-------------|----------------|
| ASV_16s_29499 | 0.080329244 | 0.30296861   | 3.551952263 | 0.335597613 | 0.999853906 NA |
| ASV_16s_29500 | 0.097183586 | 0.913300476  | 3.551717684 | 0.356672022 | 0.999820662 NA |
| ASV_16s_29501 | 0.068166664 | 0.813425534  | 3.551856544 | 0.271074572 | 0.999929058 NA |
| ASV_16s_29502 | 0.086987076 | 0.880745175  | 3.551770017 | 0.324095545 | 0.999870118 NA |
| ASV_16s_29503 | 0.139344754 | 0.919105043  | 3.551498601 | 0.494005002 | 0.999468138 NA |
| ASV_16s_29504 | 0.067244593 | 0.769930576  | 3.551745894 | 0.254842366 | 0.999942486 NA |
| ASV_16s_29505 | 0.067244593 | 0.769930576  | 3.551745894 | 0.254842366 | 0.999942486 NA |
| ASV_16s_29506 | 0.052713134 | 0.467582918  | 3.551857079 | 0.277591233 | 0.999923101 NA |
| ASV_16s_29507 | 0.065670072 | 0.764600506  | 3.551752109 | 0.251105282 | 0.999945305 NA |
| ASV_16s_29508 | 0.065670072 | 0.764600506  | 3.551752109 | 0.251105282 | 0.999945305 NA |
| ASV_16s_29509 | 0.046254707 | 0.29491806   | 3.551915606 | 0.234192596 | 0.999956868 NA |
| ASV_16s_29510 | 0.026260278 | 0.30078329   | 3.551956048 | 0.158995125 | 0.999988551 NA |
| ASV_16s_29511 | 0.026260278 | 0.30078329   | 3.551956048 | 0.158995125 | 0.999988551 NA |
| ASV_16s_29512 | 0.093869472 | 0.285184466  | 3.551765868 | 0.391679949 | 0.999754459 NA |
| ASV_16s_29513 | 0.093869472 | 0.285184466  | 3.551765868 | 0.391679949 | 0.999754459 NA |
| ASV_16s_29514 | 0.086987076 | -0.307035177 | 3.551609531 | 0.364302205 | 0.999807439 NA |
| ASV_16s_29515 | 0.104772738 | -0.355167475 | 3.551540603 | 0.437658734 | 0.999644255 NA |
| ASV_16s_29516 | 0.044691629 | -0.142015873 | 3.551789558 | 0.233212266 | 0.999957481 NA |
| ASV_16s_29517 | 0.044691629 | -0.142015873 | 3.551789558 | 0.233212266 | 0.999957481 NA |
| ASV_16s_29518 | 0.01698083  | 0.061685251  | 3.551928495 | 0.116000551 | 0.999996138 NA |
| ASV_16s_29519 | 0.135203228 | 0.919105043  | 3.551498601 | 0.478009201 | 0.999523085 NA |
| ASV_16s_29520 | 0.135203228 | 0.919105043  | 3.551498601 | 0.478009201 | 0.999523085 NA |
| ASV_16s_29521 | 0.052129423 | 0.714115485  | 3.551814391 | 0.223827108 | 0.99996304 NA  |
| ASV_16s_29522 | 0.052129423 | 0.714115485  | 3.551814391 | 0.223827108 | 0.99996304 NA  |
| ASV_16s_29523 | 0.11981106  | -0.320792589 | 3.551713374 | 0.487280526 | 0.999491735 NA |
| ASV_16s_29524 | 0.11981106  | -0.320792589 | 3.551713374 | 0.487280526 | 0.999491735 NA |
| ASV_16s_29525 | 0.11981106  | -0.320792589 | 3.551713374 | 0.487280526 | 0.999491735 NA |
| ASV_16s_29526 | 0.11981106  | -0.320792589 | 3.551713374 | 0.487280526 | 0.999491735 NA |
| ASV_16s_29527 | 0.11981106  | -0.320792589 | 3.551713374 | 0.487280526 | 0.999491735 NA |
| ASV_16s_29528 | 0.102071635 | 0.255410395  | 3.551856644 | 0.394415185 | 0.999748671 NA |
| ASV_16s_29529 | 0.122642678 | 1.015126751  | 3.551491818 | 0.448816166 | 0.999613155 NA |
| ASV_16s_29530 | 0.122642678 | 1.015126751  | 3.551491818 | 0.448816166 | 0.999613155 NA |
| ASV_16s_29531 | 0.131935388 | 0.350756181  | 3.551932884 | 0.402750182 | 0.999730453 NA |
| ASV_16s_29532 | 0.069670585 | -0.303574159 | 3.551481255 | 0.244070481 | 0.999950348 NA |
| ASV_16s_29533 | 0.07725151  | 0.939729485  | 3.551525127 | 0.241665681 | 0.999951995 NA |
| ASV_16s_29534 | 0.07725151  | 0.939729485  | 3.551525127 | 0.241665681 | 0.999951995 NA |
| ASV_16s_29535 | 0.07725151  | 0.939729485  | 3.551525127 | 0.241665681 | 0.999951995 NA |
| ASV_16s_29536 | 0.07725151  | 0.939729485  | 3.551525127 | 0.241665681 | 0.999951995 NA |
| ASV_16s_29537 | 0.07725151  | 0.939729485  | 3.551525127 | 0.241665681 | 0.999951995 NA |
| ASV_16s_29538 | 0.07725151  | 0.939729485  | 3.551525127 | 0.241665681 | 0.999951995 NA |
| ASV_16s_29539 | 0.07725151  | 0.939729485  | 3.551525127 | 0.241665681 | 0.999951995 NA |
| ASV_16s_29540 | 0.07725151  | 0.939729485  | 3.551525127 | 0.241665681 | 0.999951995 NA |
| ASV_16s_29541 | 0.07725151  | 0.939729485  | 3.551525127 | 0.241665681 | 0.999951995 NA |
| ASV_16s_29542 | 0.07725151  | 0.939729485  | 3.551525127 | 0.241665681 | 0.999951995 NA |
| ASV_16s_29543 | 0.07725151  | 0.939729485  | 3.551525127 | 0.241665681 | 0.999951995 NA |
| ASV_16s_29544 | 0.07725151  | 0.939729485  | 3.551525127 | 0.241665681 | 0.999951995 NA |
| ASV_16s_29545 | 0.07725151  | 0.939729485  | 3.551525127 | 0.241665681 | 0.999951995 NA |
| ASV_16s_29546 | 0.07725151  | 0.939729485  | 3.551525127 | 0.241665681 | 0.999951995 NA |
| ASV_16s_29547 | 0.07725151  | 0.939729485  | 3.551525127 | 0.241665681 | 0.999951995 NA |
| ASV_16s_29548 | 0.07725151  | 0.939729485  | 3.551525127 | 0.241665681 | 0.999951995 NA |
| ASV_16s_29549 | 0.07725151  | 0.939729485  | 3.551525127 | 0.241665681 | 0.999951995 NA |
| ASV_16s_29550 | 0.044020428 | -0.056462321 | 3.55164485  | 0.315476084 | 0.999881417 NA |
| ASV_16s_29551 | 0.044020428 | -0.056462321 | 3.55164485  | 0.315476084 | 0.999881417 NA |
| ASV_16s_29552 | 0.044020428 | -0.056462321 | 3.55164485  | 0.315476084 | 0.999881417 NA |
| ASV_16s_29553 | 0.044020428 | -0.056462321 | 3.55164485  | 0.315476084 | 0.999881417 NA |
| ASV_16s_29554 | 0.136932792 | -0.028206523 | 3.551112835 | 0.848639386 | 0.996915308 NA |
| ASV_16s_29555 | 0.136932792 | -0.028206523 | 3.551112835 | 0.848639386 | 0.996915308 NA |
| ASV_16s_29556 | 0.136932792 | -0.028206523 | 3.551112835 | 0.848639386 | 0.996915308 NA |
| ASV_16s_29557 | 0.121816542 | -0.027985883 | 3.551185727 | 0.762276625 | 0.997810146 NA |
| ASV_16s_29558 | 0.121816542 | -0.027985883 | 3.551185727 | 0.762276625 | 0.997810146 NA |
| ASV_16s_29559 | 0.121816542 | -0.027985883 | 3.551185727 | 0.762276625 | 0.997810146 NA |
| ASV_16s_29560 | 0.111980404 | 0.447211372  | 3.551366946 | 0.558464866 | 0.999203003 NA |
| ASV_16s_29561 | 0.121816542 | -0.027985883 | 3.551185727 | 0.762276625 | 0.997810146 NA |
| ASV_16s_29562 | 0.121816542 | -0.027985883 | 3.551185727 | 0.762276625 | 0.997810146 NA |
| ASV_16s_29563 | 0.093818994 | 0.379194869  | 3.551421129 | 0.68622912  | 0.998439323 NA |
| ASV_16s_29564 | 0.097168583 | -0.022465582 | 3.551341226 | 0.625479693 | 0.998845118 NA |
| ASV_16s_29565 | 0.087449848 | 0.359574844  | 3.551468471 | 0.653085921 | 0.99867081 NA  |

|               |             |              |             |             |             |    |
|---------------|-------------|--------------|-------------|-------------|-------------|----|
| ASV_16s_29566 | 0.097168583 | -0.022465582 | 3.551341226 | 0.625479693 | 0.998845118 | NA |
| ASV_16s_29567 | 0.097168583 | -0.022465582 | 3.551341226 | 0.625479693 | 0.998845118 | NA |
| ASV_16s_29568 | 0.097168583 | -0.022465582 | 3.551341226 | 0.625479693 | 0.998845118 | NA |
| ASV_16s_29569 | 0.097168583 | -0.022465582 | 3.551341226 | 0.625479693 | 0.998845118 | NA |
| ASV_16s_29570 | 0.097168583 | -0.022465582 | 3.551341226 | 0.625479693 | 0.998845118 | NA |
| ASV_16s_29571 | 0.097168583 | -0.022465582 | 3.551341226 | 0.625479693 | 0.998845118 | NA |
| ASV_16s_29572 | 0.097168583 | -0.022465582 | 3.551341226 | 0.625479693 | 0.998845118 | NA |
| ASV_16s_29573 | 0.097168583 | -0.022465582 | 3.551341226 | 0.625479693 | 0.998845118 | NA |
| ASV_16s_29574 | 0.097168583 | -0.022465582 | 3.551341226 | 0.625479693 | 0.998845118 | NA |
| ASV_16s_29575 | 0.097168583 | -0.022465582 | 3.551341226 | 0.625479693 | 0.998845118 | NA |
| ASV_16s_29576 | 0.097168583 | -0.022465582 | 3.551341226 | 0.625479693 | 0.998845118 | NA |
| ASV_16s_29577 | 0.093954157 | 0.295850501  | 3.551601818 | 0.508898135 | 0.999413243 | NA |
| ASV_16s_29578 | 0.076082775 | -0.016283575 | 3.551547435 | 0.515254878 | 0.999388685 | NA |
| ASV_16s_29579 | 0.058078785 | 0.007201696  | 3.551684942 | 0.428129592 | 0.999669423 | NA |
| ASV_16s_29580 | 0.058078785 | 0.007201696  | 3.551684942 | 0.428129592 | 0.999669423 | NA |
| ASV_16s_29581 | 0.058078785 | 0.007201696  | 3.551684942 | 0.428129592 | 0.999669423 | NA |
| ASV_16s_29582 | 0.058078785 | 0.007201696  | 3.551684942 | 0.428129592 | 0.999669423 | NA |
| ASV_16s_29583 | 0.058078785 | 0.007201696  | 3.551684942 | 0.428129592 | 0.999669423 | NA |
| ASV_16s_29584 | 0.058078785 | 0.007201696  | 3.551684942 | 0.428129592 | 0.999669423 | NA |
| ASV_16s_29585 | 0.066362403 | -0.06465518  | 3.551400207 | 0.433936581 | 0.999654236 | NA |
| ASV_16s_29586 | 0.066362403 | -0.06465518  | 3.551400207 | 0.433936581 | 0.999654236 | NA |
| ASV_16s_29587 | 0.066362403 | -0.06465518  | 3.551400207 | 0.433936581 | 0.999654236 | NA |
| ASV_16s_29588 | 0.066362403 | -0.06465518  | 3.551400207 | 0.433936581 | 0.999654236 | NA |
| ASV_16s_29589 | 0.066362403 | -0.06465518  | 3.551400207 | 0.433936581 | 0.999654236 | NA |
| ASV_16s_29590 | 0.066362403 | -0.06465518  | 3.551400207 | 0.433936581 | 0.999654236 | NA |
| ASV_16s_29591 | 0.066362403 | -0.06465518  | 3.551400207 | 0.433936581 | 0.999654236 | NA |
| ASV_16s_29592 | 0.048468419 | -0.046302886 | 3.551654696 | 0.354624366 | 0.999824101 | NA |
| ASV_16s_29593 | 0.048468419 | -0.046302886 | 3.551654696 | 0.354624366 | 0.999824101 | NA |
| ASV_16s_29594 | 0.048468419 | -0.046302886 | 3.551654696 | 0.354624366 | 0.999824101 | NA |
| ASV_16s_29595 | 0.048468419 | -0.046302886 | 3.551654696 | 0.354624366 | 0.999824101 | NA |
| ASV_16s_29596 | 0.048468419 | -0.046302886 | 3.551654696 | 0.354624366 | 0.999824101 | NA |
| ASV_16s_29597 | 0.048468419 | -0.046302886 | 3.551654696 | 0.354624366 | 0.999824101 | NA |
| ASV_16s_29598 | 0.048468419 | -0.046302886 | 3.551654696 | 0.354624366 | 0.999824101 | NA |
| ASV_16s_29599 | 0.048468419 | -0.046302886 | 3.551654696 | 0.354624366 | 0.999824101 | NA |
| ASV_16s_29600 | 0.048468419 | -0.046302886 | 3.551654696 | 0.354624366 | 0.999824101 | NA |
| ASV_16s_29601 | 0.047597522 | -0.044122717 | 3.551666055 | 0.351085166 | 0.999829936 | NA |
| ASV_16s_29602 | 0.047597522 | -0.044122717 | 3.551666055 | 0.351085166 | 0.999829936 | NA |
| ASV_16s_29603 | 0.047597522 | -0.044122717 | 3.551666055 | 0.351085166 | 0.999829936 | NA |
| ASV_16s_29604 | 0.047597522 | -0.044122717 | 3.551666055 | 0.351085166 | 0.999829936 | NA |
| ASV_16s_29605 | 0.047597522 | -0.044122717 | 3.551666055 | 0.351085166 | 0.999829936 | NA |
| ASV_16s_29606 | 0.047597522 | -0.044122717 | 3.551666055 | 0.351085166 | 0.999829936 | NA |
| ASV_16s_29607 | 0.047597522 | -0.044122717 | 3.551666055 | 0.351085166 | 0.999829936 | NA |
| ASV_16s_29608 | 0.047597522 | -0.044122717 | 3.551666055 | 0.351085166 | 0.999829936 | NA |
| ASV_16s_29609 | 0.047597522 | -0.044122717 | 3.551666055 | 0.351085166 | 0.999829936 | NA |
| ASV_16s_29610 | 0.047597522 | -0.044122717 | 3.551666055 | 0.351085166 | 0.999829936 | NA |
| ASV_16s_29611 | 0.047597522 | -0.044122717 | 3.551666055 | 0.351085166 | 0.999829936 | NA |
| ASV_16s_29612 | 0.047597522 | -0.044122717 | 3.551666055 | 0.351085166 | 0.999829936 | NA |
| ASV_16s_29613 | 0.047597522 | -0.044122717 | 3.551666055 | 0.351085166 | 0.999829936 | NA |
| ASV_16s_29614 | 0.055150996 | -0.056388238 | 3.55155405  | 0.382602447 | 0.999773013 | NA |
| ASV_16s_29615 | 0.065785739 | 0.348009214  | 3.551793678 | 0.36764384  | 0.999801442 | NA |
| ASV_16s_29616 | 0.080329244 | -0.071289005 | 3.551259989 | 0.502943814 | 0.999435631 | NA |
| ASV_16s_29617 | 0.080329244 | -0.071289005 | 3.551259989 | 0.502943814 | 0.999435631 | NA |
| ASV_16s_29618 | 0.080329244 | -0.071289005 | 3.551259989 | 0.502943814 | 0.999435631 | NA |
| ASV_16s_29619 | 0.080329244 | -0.071289005 | 3.551259989 | 0.502943814 | 0.999435631 | NA |
| ASV_16s_29620 | 0.080329244 | -0.071289005 | 3.551259989 | 0.502943814 | 0.999435631 | NA |
| ASV_16s_29621 | 0.080329244 | -0.071289005 | 3.551259989 | 0.502943814 | 0.999435631 | NA |
| ASV_16s_29622 | 0.080329244 | -0.071289005 | 3.551259989 | 0.502943814 | 0.999435631 | NA |
| ASV_16s_29623 | 0.080329244 | -0.071289005 | 3.551259989 | 0.502943814 | 0.999435631 | NA |
| ASV_16s_29624 | 0.080329244 | -0.071289005 | 3.551259989 | 0.502943814 | 0.999435631 | NA |
| ASV_16s_29625 | 0.059057138 | -0.059458629 | 3.551494207 | 0.400048311 | 0.999736455 | NA |
| ASV_16s_29626 | 0.059057138 | -0.059458629 | 3.551494207 | 0.400048311 | 0.999736455 | NA |
| ASV_16s_29627 | 0.059057138 | -0.059458629 | 3.551494207 | 0.400048311 | 0.999736455 | NA |
| ASV_16s_29628 | 0.059057138 | -0.059458629 | 3.551494207 | 0.400048311 | 0.999736455 | NA |
| ASV_16s_29629 | 0.066251775 | 0.344841651  | 3.551795757 | 0.453614291 | 0.999599227 | NA |
| ASV_16s_29630 | 0.066251775 | 0.344841651  | 3.551795757 | 0.453614291 | 0.999599227 | NA |
| ASV_16s_29631 | 0.066251775 | 0.344841651  | 3.551795757 | 0.453614291 | 0.999599227 | NA |
| ASV_16s_29632 | 0.066251775 | 0.344841651  | 3.551795757 | 0.453614291 | 0.999599227 | NA |





|               |             |             |             |             |                |
|---------------|-------------|-------------|-------------|-------------|----------------|
| ASV_16s_29700 | 0.065962676 | 0.31594104  | 3.551665719 | 0.416385796 | 0.999698726 NA |
| ASV_16s_29701 | 0.065962676 | 0.31594104  | 3.551665719 | 0.416385796 | 0.999698726 NA |
| ASV_16s_29702 | 0.065962676 | 0.31594104  | 3.551665719 | 0.416385796 | 0.999698726 NA |
| ASV_16s_29703 | 0.064251698 | 0.315941132 | 3.551692181 | 0.408619554 | 0.999717093 NA |
| ASV_16s_29704 | 0.063567307 | 0.315941118 | 3.551703141 | 0.405542966 | 0.999724152 NA |
| ASV_16s_29705 | 0.096268051 | 0.706410502 | 3.551772229 | 0.492006725 | 0.999475226 NA |
| ASV_16s_29706 | 0.102406863 | 0.315940389 | 3.551286639 | 0.598903952 | 0.998997757 NA |
| ASV_16s_29707 | 0.102406863 | 0.315940389 | 3.551286639 | 0.598903952 | 0.998997757 NA |
| ASV_16s_29708 | 0.102406863 | 0.315940389 | 3.551286639 | 0.598903952 | 0.998997757 NA |
| ASV_16s_29709 | 0.102406863 | 0.315940389 | 3.551286639 | 0.598903952 | 0.998997757 NA |
| ASV_16s_29710 | 0.102406863 | 0.315940389 | 3.551286639 | 0.598903952 | 0.998997757 NA |
| ASV_16s_29711 | 0.070950917 | 0.315940957 | 3.551592132 | 0.439312672 | 0.999639757 NA |
| ASV_16s_29712 | 0.061514133 | 0.315233961 | 3.551730435 | 0.396351014 | 0.999744518 NA |
| ASV_16s_29713 | 0.061514133 | 0.315233961 | 3.551730435 | 0.396351014 | 0.999744518 NA |
| ASV_16s_29714 | 0.061514133 | 0.315233961 | 3.551730435 | 0.396351014 | 0.999744518 NA |
| ASV_16s_29715 | 0.061514133 | 0.315233961 | 3.551730435 | 0.396351014 | 0.999744518 NA |
| ASV_16s_29716 | 0.061514133 | 0.315233961 | 3.551730435 | 0.396351014 | 0.999744518 NA |
| ASV_16s_29717 | 0.061514133 | 0.315233961 | 3.551730435 | 0.396351014 | 0.999744518 NA |
| ASV_16s_29718 | 0.061514133 | 0.315233961 | 3.551730435 | 0.396351014 | 0.999744518 NA |
| ASV_16s_29719 | 0.061514133 | 0.315233961 | 3.551730435 | 0.396351014 | 0.999744518 NA |
| ASV_16s_29720 | 0.061514133 | 0.315233961 | 3.551730435 | 0.396351014 | 0.999744518 NA |
| ASV_16s_29721 | 0.061514133 | 0.315233961 | 3.551730435 | 0.396351014 | 0.999744518 NA |
| ASV_16s_29722 | 0.061514133 | 0.315233961 | 3.551730435 | 0.396351014 | 0.999744518 NA |
| ASV_16s_29723 | 0.061514133 | 0.315233961 | 3.551730435 | 0.396351014 | 0.999744518 NA |
| ASV_16s_29724 | 0.061514133 | 0.315233961 | 3.551730435 | 0.396351014 | 0.999744518 NA |
| ASV_16s_29725 | 0.061514133 | 0.315233961 | 3.551730435 | 0.396351014 | 0.999744518 NA |
| ASV_16s_29726 | 0.061514133 | 0.315233961 | 3.551730435 | 0.396351014 | 0.999744518 NA |
| ASV_16s_29727 | 0.061514133 | 0.315233961 | 3.551730435 | 0.396351014 | 0.999744518 NA |
| ASV_16s_29728 | 0.061514133 | 0.315233961 | 3.551730435 | 0.396351014 | 0.999744518 NA |
| ASV_16s_29729 | 0.061514133 | 0.315233961 | 3.551730435 | 0.396351014 | 0.999744518 NA |
| ASV_16s_29730 | 0.061514133 | 0.315233961 | 3.551730435 | 0.396351014 | 0.999744518 NA |
| ASV_16s_29731 | 0.061514133 | 0.315233961 | 3.551730435 | 0.396351014 | 0.999744518 NA |
| ASV_16s_29732 | 0.061514133 | 0.315233961 | 3.551730435 | 0.396351014 | 0.999744518 NA |
| ASV_16s_29733 | 0.061514133 | 0.315233961 | 3.551730435 | 0.396351014 | 0.999744518 NA |
| ASV_16s_29734 | 0.061514133 | 0.315233961 | 3.551730435 | 0.396351014 | 0.999744518 NA |
| ASV_16s_29735 | 0.061514133 | 0.315233961 | 3.551730435 | 0.396351014 | 0.999744518 NA |
| ASV_16s_29736 | 0.061514133 | 0.315233961 | 3.551730435 | 0.396351014 | 0.999744518 NA |
| ASV_16s_29737 | 0.061514133 | 0.315233961 | 3.551730435 | 0.396351014 | 0.999744518 NA |
| ASV_16s_29738 | 0.061514133 | 0.315233961 | 3.551730435 | 0.396351014 | 0.999744518 NA |
| ASV_16s_29739 | 0.061514133 | 0.315233961 | 3.551730435 | 0.396351014 | 0.999744518 NA |
| ASV_16s_29740 | 0.061514133 | 0.315233961 | 3.551730435 | 0.396351014 | 0.999744518 NA |
| ASV_16s_29741 | 0.061514133 | 0.315233961 | 3.551730435 | 0.396351014 | 0.999744518 NA |
| ASV_16s_29742 | 0.061514133 | 0.315233961 | 3.551730435 | 0.396351014 | 0.999744518 NA |
| ASV_16s_29743 | 0.061514133 | 0.315233961 | 3.551730435 | 0.396351014 | 0.999744518 NA |
| ASV_16s_29744 | 0.061514133 | 0.315233961 | 3.551730435 | 0.396351014 | 0.999744518 NA |
| ASV_16s_29745 | 0.061514133 | 0.315233961 | 3.551730435 | 0.396351014 | 0.999744518 NA |
| ASV_16s_29746 | 0.061514133 | 0.315233961 | 3.551730435 | 0.396351014 | 0.999744518 NA |
| ASV_16s_29747 | 0.061514133 | 0.315233961 | 3.551730435 | 0.396351014 | 0.999744518 NA |
| ASV_16s_29748 | 0.061514133 | 0.315233961 | 3.551730435 | 0.396351014 | 0.999744518 NA |
| ASV_16s_29749 | 0.061514133 | 0.315233961 | 3.551730435 | 0.396351014 | 0.999744518 NA |
| ASV_16s_29750 | 0.061514133 | 0.315233961 | 3.551730435 | 0.396351014 | 0.999744518 NA |
| ASV_16s_29751 | 0.061514133 | 0.315233961 | 3.551730435 | 0.396351014 | 0.999744518 NA |
| ASV_16s_29752 | 0.061514133 | 0.315233961 | 3.551730435 | 0.396351014 | 0.999744518 NA |
| ASV_16s_29753 | 0.061514133 | 0.315233961 | 3.551730435 | 0.396351014 | 0.999744518 NA |
| ASV_16s_29754 | 0.061514133 | 0.315233961 | 3.551730435 | 0.396351014 | 0.999744518 NA |
| ASV_16s_29755 | 0.064792847 | 0.411137615 | 3.551839291 | 0.196159977 | 0.999976459 NA |
| ASV_16s_29756 | 0.074043744 | 0.315940892 | 3.551551005 | 0.453856862 | 0.999598514 NA |
| ASV_16s_29757 | 0.076962519 | 0.531792364 | 3.551415375 | 0.536996941 | 0.999299421 NA |
| ASV_16s_29758 | 0.115809116 | 0.315940266 | 3.551206494 | 0.671400906 | 0.998545958 NA |
| ASV_16s_29759 | 0.115809116 | 0.315940266 | 3.551206494 | 0.671400906 | 0.998545958 NA |
| ASV_16s_29760 | 0.082825772 | 0.595611342 | 3.550882297 | 0.281793583 | 0.99991908 NA  |
| ASV_16s_29761 | 0.082825772 | 0.595611342 | 3.550882297 | 0.281793583 | 0.99991908 NA  |
| ASV_16s_29762 | 0.082825772 | 0.595611342 | 3.550882297 | 0.281793583 | 0.99991908 NA  |
| ASV_16s_29763 | 0.082825772 | 0.595611342 | 3.550882297 | 0.281793583 | 0.99991908 NA  |
| ASV_16s_29764 | 0.058582187 | 0.685302893 | 3.55166979  | 0.331766369 | 0.999859453 NA |
| ASV_16s_29765 | 0.058582187 | 0.685302893 | 3.55166979  | 0.331766369 | 0.999859453 NA |
| ASV_16s_29766 | 0.058582187 | 0.685302893 | 3.55166979  | 0.331766369 | 0.999859453 NA |











|               |             |              |             |             |                |
|---------------|-------------|--------------|-------------|-------------|----------------|
| ASV_16s_30102 | 0.049991134 | 0.114414255  | 3.551918201 | 0.2716618   | 0.999928535 NA |
| ASV_16s_30103 | 0.049991134 | 0.114414255  | 3.551918201 | 0.2716618   | 0.999928535 NA |
| ASV_16s_30104 | 0.048983979 | 0.075196264  | 3.551904039 | 0.27146116  | 0.999928714 NA |
| ASV_16s_30105 | 0.050250053 | 0.064625931  | 3.551898175 | 0.276082621 | 0.99992451 NA  |
| ASV_16s_30106 | 0.048983979 | 0.075196264  | 3.551904039 | 0.27146116  | 0.999928714 NA |
| ASV_16s_30107 | 0.050250053 | 0.064625931  | 3.551898175 | 0.276082621 | 0.99992451 NA  |
| ASV_16s_30108 | 0.048983979 | 0.075196264  | 3.551904039 | 0.27146116  | 0.999928714 NA |
| ASV_16s_30109 | 0.050250053 | 0.064625931  | 3.551898175 | 0.276082621 | 0.99992451 NA  |
| ASV_16s_30110 | 0.050508972 | 0.023867349  | 3.551879441 | 0.278941604 | 0.999921825 NA |
| ASV_16s_30111 | 0.050508972 | 0.023867349  | 3.551879441 | 0.278941604 | 0.999921825 NA |
| ASV_16s_30112 | 0.050508972 | 0.023867349  | 3.551879441 | 0.278941604 | 0.999921825 NA |
| ASV_16s_30113 | 0.050508972 | 0.023867349  | 3.551879441 | 0.278941604 | 0.999921825 NA |
| ASV_16s_30114 | 0.048989683 | 0.036175609  | 3.551888899 | 0.273477782 | 0.9999269 NA   |
| ASV_16s_30115 | 0.050508972 | 0.023867349  | 3.551879441 | 0.278941604 | 0.999921825 NA |
| ASV_16s_30116 | 0.050767891 | -0.014907102 | 3.551863083 | 0.27934594  | 0.99992144 NA  |
| ASV_16s_30117 | 0.050767891 | -0.014907102 | 3.551863083 | 0.27934594  | 0.99992144 NA  |
| ASV_16s_30118 | 0.050767891 | -0.014907102 | 3.551863083 | 0.27934594  | 0.99992144 NA  |
| ASV_16s_30119 | 0.050767891 | -0.014907102 | 3.551863083 | 0.27934594  | 0.99992144 NA  |
| ASV_16s_30120 | 0.059809318 | -0.037340884 | 3.551846535 | 0.317208699 | 0.999879203 NA |
| ASV_16s_30121 | 0.048995387 | -0.001583825 | 3.551873163 | 0.273070192 | 0.999927269 NA |
| ASV_16s_30122 | 0.049001091 | -0.038173832 | 3.551859376 | 0.270416407 | 0.999929641 NA |
| ASV_16s_30123 | 0.05102681  | -0.052372899 | 3.551848746 | 0.277386463 | 0.999923293 NA |
| ASV_16s_30124 | 0.05102681  | -0.052372899 | 3.551848746 | 0.277386463 | 0.999923293 NA |
| ASV_16s_30125 | 0.055419545 | -0.137480252 | 3.551815156 | 0.279999026 | 0.999920815 NA |
| ASV_16s_30126 | 0.017500987 | 0.054635407  | 3.551948085 | 0.123717612 | 0.999995176 NA |
| ASV_16s_30127 | 0.017500987 | 0.054635407  | 3.551948085 | 0.123717612 | 0.999995176 NA |
| ASV_16s_30128 | 0.017500987 | 0.054635407  | 3.551948085 | 0.123717612 | 0.999995176 NA |
| ASV_16s_30129 | 0.083049351 | -0.304925849 | 3.551661528 | 0.356009233 | 0.99982178 NA  |
| ASV_16s_30130 | 0.083049351 | -0.304925849 | 3.551661528 | 0.356009233 | 0.99982178 NA  |
| ASV_16s_30131 | 0.083049351 | -0.304925849 | 3.551661528 | 0.356009233 | 0.99982178 NA  |
| ASV_16s_30132 | 0.083049351 | -0.304925849 | 3.551661528 | 0.356009233 | 0.99982178 NA  |
| ASV_16s_30133 | 0.066790678 | -0.273163462 | 3.551714542 | 0.294346083 | 0.999906203 NA |
| ASV_16s_30134 | 0.066790678 | -0.273163462 | 3.551714542 | 0.294346083 | 0.999906203 NA |
| ASV_16s_30135 | 0.066790678 | -0.273163462 | 3.551714542 | 0.294346083 | 0.999906203 NA |
| ASV_16s_30136 | 0.066790678 | -0.273163462 | 3.551714542 | 0.294346083 | 0.999906203 NA |
| ASV_16s_30137 | 0.066790678 | -0.273163462 | 3.551714542 | 0.294346083 | 0.999906203 NA |
| ASV_16s_30138 | 0.066790678 | -0.273163462 | 3.551714542 | 0.294346083 | 0.999906203 NA |
| ASV_16s_30139 | 0.066790678 | -0.273163462 | 3.551714542 | 0.294346083 | 0.999906203 NA |
| ASV_16s_30140 | 0.066790678 | -0.273163462 | 3.551714542 | 0.294346083 | 0.999906203 NA |
| ASV_16s_30141 | 0.066790678 | -0.273163462 | 3.551714542 | 0.294346083 | 0.999906203 NA |
| ASV_16s_30142 | 0.066790678 | -0.273163462 | 3.551714542 | 0.294346083 | 0.999906203 NA |
| ASV_16s_30143 | 0.066790678 | -0.273163462 | 3.551714542 | 0.294346083 | 0.999906203 NA |
| ASV_16s_30144 | 0.066790678 | -0.273163462 | 3.551714542 | 0.294346083 | 0.999906203 NA |
| ASV_16s_30145 | 0.066790678 | -0.273163462 | 3.551714542 | 0.294346083 | 0.999906203 NA |
| ASV_16s_30146 | 0.066790678 | -0.273163462 | 3.551714542 | 0.294346083 | 0.999906203 NA |
| ASV_16s_30147 | 0.066790678 | -0.273163462 | 3.551714542 | 0.294346083 | 0.999906203 NA |
| ASV_16s_30148 | 0.066790678 | -0.273163462 | 3.551714542 | 0.294346083 | 0.999906203 NA |
| ASV_16s_30149 | 0.066790678 | -0.273163462 | 3.551714542 | 0.294346083 | 0.999906203 NA |
| ASV_16s_30150 | 0.066790678 | -0.273163462 | 3.551714542 | 0.294346083 | 0.999906203 NA |
| ASV_16s_30151 | 0.066790678 | -0.273163462 | 3.551714542 | 0.294346083 | 0.999906203 NA |
| ASV_16s_30152 | 0.066790678 | -0.273163462 | 3.551714542 | 0.294346083 | 0.999906203 NA |
| ASV_16s_30153 | 0.064936095 | -0.264121215 | 3.551728947 | 0.287913743 | 0.999912967 NA |
| ASV_16s_30154 | 0.064008804 | -0.259556351 | 3.55173566  | 0.284741544 | 0.999916174 NA |
| ASV_16s_30155 | 0.063545159 | -0.257269917 | 3.55173881  | 0.28316611  | 0.999917736 NA |
| ASV_16s_30156 | 0.068183705 | -0.279901654 | 3.551703055 | 0.299270154 | 0.999900784 NA |
| ASV_16s_30157 | 0.068183705 | -0.279901654 | 3.551703055 | 0.299270154 | 0.999900784 NA |
| ASV_16s_30158 | 0.068183705 | -0.279901654 | 3.551703055 | 0.299270154 | 0.999900784 NA |
| ASV_16s_30159 | 0.068880219 | -0.28322977  | 3.551697429 | 0.301764991 | 0.999897957 NA |
| ASV_16s_30160 | 0.068880219 | -0.28322977  | 3.551697429 | 0.301764991 | 0.999897957 NA |
| ASV_16s_30161 | 0.068880219 | -0.28322977  | 3.551697429 | 0.301764991 | 0.999897957 NA |
| ASV_16s_30162 | 0.068880219 | -0.28322977  | 3.551697429 | 0.301764991 | 0.999897957 NA |
| ASV_16s_30163 | 0.068880219 | -0.28322977  | 3.551697429 | 0.301764991 | 0.999897957 NA |
| ASV_16s_30164 | 0.068880219 | -0.28322977  | 3.551697429 | 0.301764991 | 0.999897957 NA |
| ASV_16s_30165 | 0.068880219 | -0.28322977  | 3.551697429 | 0.301764991 | 0.999897957 NA |
| ASV_16s_30166 | 0.068880219 | -0.28322977  | 3.551697429 | 0.301764991 | 0.999897957 NA |
| ASV_16s_30167 | 0.068880219 | -0.28322977  | 3.551697429 | 0.301764991 | 0.999897957 NA |
| ASV_16s_30168 | 0.068880219 | -0.28322977  | 3.551697429 | 0.301764991 | 0.999897957 NA |







|               |             |              |             |              |             |    |
|---------------|-------------|--------------|-------------|--------------|-------------|----|
| ASV_16s_30303 | 0.049023908 | -0.181482018 | 3.551812296 | 0.239414962  | 0.999953501 | NA |
| ASV_16s_30304 | 0.049023908 | -0.181482018 | 3.551812296 | 0.239414962  | 0.999953501 | NA |
| ASV_16s_30305 | 0.049023908 | -0.181482018 | 3.551812296 | 0.239414962  | 0.999953501 | NA |
| ASV_16s_30306 | 0.049023908 | -0.181482018 | 3.551812296 | 0.239414962  | 0.999953501 | NA |
| ASV_16s_30307 | 0.049023908 | -0.181482018 | 3.551812296 | 0.239414962  | 0.999953501 | NA |
| ASV_16s_30308 | 0.049023908 | -0.181482018 | 3.551812296 | 0.239414962  | 0.999953501 | NA |
| ASV_16s_30309 | 0.049023908 | -0.181482018 | 3.551812296 | 0.239414962  | 0.999953501 | NA |
| ASV_16s_30310 | 0.049023908 | -0.181482018 | 3.551812296 | 0.239414962  | 0.999953501 | NA |
| ASV_16s_30311 | 0.049023908 | -0.181482018 | 3.551812296 | 0.239414962  | 0.999953501 | NA |
| ASV_16s_30312 | 0.049023908 | -0.181482018 | 3.551812296 | 0.239414962  | 0.999953501 | NA |
| ASV_16s_30313 | 0.049023908 | -0.181482018 | 3.551812296 | 0.239414962  | 0.999953501 | NA |
| ASV_16s_30314 | 0.049023908 | -0.181482018 | 3.551812296 | 0.239414962  | 0.999953501 | NA |
| ASV_16s_30315 | 0.049023908 | -0.181482018 | 3.551812296 | 0.239414962  | 0.999953501 | NA |
| ASV_16s_30316 | 0.049023908 | -0.181482018 | 3.551812296 | 0.239414962  | 0.999953501 | NA |
| ASV_16s_30317 | 0.049023908 | -0.181482018 | 3.551812296 | 0.239414962  | 0.999953501 | NA |
| ASV_16s_30318 | 0.049023908 | -0.181482018 | 3.551812296 | 0.239414962  | 0.999953501 | NA |
| ASV_16s_30319 | 0.049023908 | -0.181482018 | 3.551812296 | 0.239414962  | 0.999953501 | NA |
| ASV_16s_30320 | 0.049023908 | -0.181482018 | 3.551812296 | 0.239414962  | 0.999953501 | NA |
| ASV_16s_30321 | 0.049023908 | -0.181482018 | 3.551812296 | 0.239414962  | 0.999953501 | NA |
| ASV_16s_30322 | 0.049023908 | -0.181482018 | 3.551812296 | 0.239414962  | 0.999953501 | NA |
| ASV_16s_30323 | 0.049023908 | -0.181482018 | 3.551812296 | 0.239414962  | 0.999953501 | NA |
| ASV_16s_30324 | 0.049023908 | -0.181482018 | 3.551812296 | 0.239414962  | 0.999953501 | NA |
| ASV_16s_30325 | 0.049023908 | -0.181482018 | 3.551812296 | 0.239414962  | 0.999953501 | NA |
| ASV_16s_30326 | 0.049023908 | -0.181482018 | 3.551812296 | 0.239414962  | 0.999953501 | NA |
| ASV_16s_30327 | 0.049023908 | -0.181482018 | 3.551812296 | 0.239414962  | 0.999953501 | NA |
| ASV_16s_30328 | 0.074670077 | -0.304925849 | 3.551661528 | 0.323369173  | 0.999871097 | NA |
| ASV_16s_30329 | 0.074670077 | -0.304925849 | 3.551661528 | 0.323369173  | 0.999871097 | NA |
| ASV_16s_30330 | 0.108241842 | 0.87888586   | 3.551772725 | 0.390773612  | 0.999756357 | NA |
| ASV_16s_30331 | 0.108241842 | 0.87888586   | 3.551772725 | 0.390773612  | 0.999756357 | NA |
| ASV_16s_30332 | 0.072161228 | 0.678839466  | 3.551955164 | 0.246832898  | 0.999948409 | NA |
| ASV_16s_30333 | 0.019209488 | 0.114616778  | 3.551517095 | 0.05183422   | 0.99999764  | NA |
| ASV_16s_30334 | 0.013854461 | -0.047289811 | 3.551567366 | 0.002735845  | 1           | NA |
| ASV_16s_30335 | 0.013854461 | -0.047289811 | 3.551567366 | 0.002735845  | 1           | NA |
| ASV_16s_30336 | 0.022793602 | 0.1162244    | 3.55143768  | 0.070805897  | 0.999999302 | NA |
| ASV_16s_30337 | 0.010856716 | -0.008923292 | 3.551647457 | -0.014503678 | 1           | NA |
| ASV_16s_30338 | 0.016622927 | -0.076166335 | 3.551512321 | 0.020515681  | 0.999999991 | NA |
| ASV_16s_30344 | 0.076454559 | 0.595540796  | 3.55091001  | 0.248941318  | 0.999946893 | NA |
| ASV_16s_30345 | 0.034688843 | 0.594498795  | 3.551272353 | 0.09441819   | 0.999998105 | NA |
| ASV_16s_30346 | 0.068880219 | 0.685896776  | 3.551512977 | 0.360663751  | 0.999813825 | NA |
| ASV_16s_30347 | 0.068880219 | 0.685896776  | 3.551512977 | 0.360663751  | 0.999813825 | NA |
| ASV_16s_30348 | 0.068880219 | 0.685896776  | 3.551512977 | 0.360663751  | 0.999813825 | NA |
| ASV_16s_30349 | 0.054075865 | 0.679977695  | 3.551727578 | 0.304798244  | 0.999894446 | NA |
| ASV_16s_30350 | 0.064188876 | 0.073291233  | 3.551913325 | 0.281392744  | 0.99991947  | NA |
| ASV_16s_30351 | 0.056182938 | 0.02538281   | 3.551876481 | 0.302899446  | 0.999896653 | NA |
| ASV_16s_30352 | 0.079461322 | -0.177282866 | 3.551829075 | 0.289639809  | 0.999911186 | NA |
| ASV_16s_30353 | 0.075550601 | 0.31731478   | 3.551965576 | 0.263487886  | 0.999935578 | NA |
| ASV_16s_30354 | 0.067917339 | 0.439020461  | 3.551955688 | 0.207691358  | 0.999971377 | NA |
| ASV_16s_30355 | 0.053083881 | 0.121945356  | 3.551948499 | 0.200563592  | 0.9999746   | NA |
| ASV_16s_30356 | 0.090398523 | -0.268097616 | 3.551772596 | 0.313129959  | 0.99988437  | NA |
| ASV_16s_30357 | 0.055087778 | 0.015262212  | 3.551883818 | 0.196776445  | 0.999976205 | NA |
| ASV_16s_30358 | 0.051524773 | 0.160894084  | 3.551924616 | 0.195533267  | 0.999976716 | NA |
| ASV_16s_30359 | 0.073035021 | -0.067888708 | 3.551912022 | 0.232248261  | 0.999958077 | NA |
| ASV_16s_30360 | 0.059745379 | 0.112738509  | 3.551913062 | 0.230299967  | 0.999959264 | NA |
| ASV_16s_30361 | 0.064595052 | -0.017070587 | 3.551933919 | 0.237886011  | 0.999954505 | NA |
| ASV_16s_30362 | 0.065813951 | -0.017070587 | 3.551933919 | 0.241313731  | 0.999952233 | NA |
| ASV_16s_30363 | 0.065813951 | -0.017070587 | 3.551933919 | 0.241313731  | 0.999952233 | NA |
| ASV_16s_30364 | 0.062625081 | -0.017070588 | 3.551933919 | 0.232330974  | 0.999958026 | NA |
| ASV_16s_30365 | 0.062025488 | 0.209044696  | 3.551937453 | 0.204996414  | 0.999972628 | NA |
| ASV_16s_30366 | 0.052868868 | 0.569449227  | 3.551995225 | 0.219577806  | 0.999965382 | NA |
| ASV_16s_30367 | 0.072187899 | 0.028324785  | 3.551925627 | 0.267500026  | 0.999932185 | NA |
| ASV_16s_30368 | 0.065200697 | 0.028324786  | 3.551925627 | 0.250089891  | 0.999946054 | NA |
| ASV_16s_30369 | 0.059004604 | 0.037245698  | 3.551920482 | 0.155093837  | 0.999989488 | NA |
| ASV_16s_30370 | 0.053036976 | 0.295530674  | 3.551917408 | 0.204374415  | 0.999972911 | NA |
| ASV_16s_30371 | 0.053521103 | 0.591837559  | 3.551981219 | 0.234582106  | 0.999956623 | NA |
| ASV_16s_30372 | 0.065193227 | 0.06953675   | 3.551880556 | 0.264764489  | 0.999934512 | NA |
| ASV_16s_30373 | 0.064587443 | 0.06953675   | 3.551880556 | 0.262087028  | 0.999936735 | NA |
| ASV_16s_30374 | 0.06315824  | 0.517911004  | 3.551807891 | 0.14984123   | 0.999990663 | NA |

|               |             |              |             |             |                |
|---------------|-------------|--------------|-------------|-------------|----------------|
| ASV_16s_30375 | 0.067681873 | 0.497292235  | 3.551706678 | 0.313168755 | 0.999884322 NA |
| ASV_16s_30376 | 0.070421333 | 0.221291194  | 3.551984974 | 0.234609374 | 0.999956606 NA |
| ASV_16s_30377 | 0.064311309 | 0.798072454  | 3.5518724   | 0.252351867 | 0.999944376 NA |
| ASV_16s_30378 | 0.064311309 | 0.798072454  | 3.5518724   | 0.252351867 | 0.999944376 NA |
| ASV_16s_30379 | 0.064311309 | 0.798072454  | 3.5518724   | 0.252351867 | 0.999944376 NA |
| ASV_16s_30380 | 0.064311309 | 0.798072454  | 3.5518724   | 0.252351867 | 0.999944376 NA |
| ASV_16s_30381 | 0.064311309 | 0.798072454  | 3.5518724   | 0.252351867 | 0.999944376 NA |
| ASV_16s_30382 | 0.064311309 | 0.798072454  | 3.5518724   | 0.252351867 | 0.999944376 NA |
| ASV_16s_30383 | 0.082999253 | 0.303873667  | 3.551955643 | 0.342454034 | 0.999843605 NA |
| ASV_16s_30384 | 0.082999253 | 0.303873667  | 3.551955643 | 0.342454034 | 0.999843605 NA |
| ASV_16s_30385 | 0.077421248 | 0.314244199  | 3.551997083 | 0.219303589 | 0.999965529 NA |
| ASV_16s_30386 | 0.105692759 | 0.303873667  | 3.551955643 | 0.428821034 | 0.999667639 NA |
| ASV_16s_30387 | 0.037839542 | 0.31118915   | 3.551985668 | 0.206926336 | 0.999971736 NA |
| ASV_16s_30388 | 0.039008294 | -0.119774727 | 3.551865625 | 0.217537193 | 0.999966468 NA |
| ASV_16s_30389 | 0.068141335 | 0.849409819  | 3.551832752 | 0.263494697 | 0.999935573 NA |
| ASV_16s_30390 | 0.068141335 | 0.849409819  | 3.551832752 | 0.263494697 | 0.999935573 NA |
| ASV_16s_30391 | 0.068141335 | 0.849409819  | 3.551832752 | 0.263494697 | 0.999935573 NA |
| ASV_16s_30392 | 0.068141335 | 0.849409819  | 3.551832752 | 0.263494697 | 0.999935573 NA |
| ASV_16s_30393 | 0.076182743 | 0.900818566  | 3.551879286 | 0.145244566 | 0.999991613 NA |
| ASV_16s_30394 | 0.054274267 | 0.78401026   | 3.551910866 | 0.229464221 | 0.999959766 NA |
| ASV_16s_30395 | 0.054274267 | 0.78401026   | 3.551910866 | 0.229464221 | 0.999959766 NA |
| ASV_16s_30396 | 0.054274267 | 0.78401026   | 3.551910866 | 0.229464221 | 0.999959766 NA |
| ASV_16s_30397 | 0.054274267 | 0.78401026   | 3.551910866 | 0.229464221 | 0.999959766 NA |
| ASV_16s_30398 | 0.054274267 | 0.78401026   | 3.551910866 | 0.229464221 | 0.999959766 NA |
| ASV_16s_30399 | 0.054274267 | 0.78401026   | 3.551910866 | 0.229464221 | 0.999959766 NA |
| ASV_16s_30400 | 0.054274267 | 0.78401026   | 3.551910866 | 0.229464221 | 0.999959766 NA |
| ASV_16s_30401 | 0.054274267 | 0.78401026   | 3.551910866 | 0.229464221 | 0.999959766 NA |
| ASV_16s_30402 | 0.054274267 | 0.78401026   | 3.551910866 | 0.229464221 | 0.999959766 NA |
| ASV_16s_30403 | 0.06472202  | 0.896489182  | 3.551881944 | 0.125127034 | 0.999994984 NA |
| ASV_16s_30404 | 0.057962129 | 0.802565822  | 3.551891092 | 0.237670298 | 0.999954646 NA |
| ASV_16s_30405 | 0.057962129 | 0.802565822  | 3.551891092 | 0.237670298 | 0.999954646 NA |
| ASV_16s_30406 | 0.061070787 | 0.817630983  | 3.551874442 | 0.245109367 | 0.999949625 NA |
| ASV_16s_30407 | 0.061070787 | 0.817630983  | 3.551874442 | 0.245109367 | 0.999949625 NA |
| ASV_16s_30408 | 0.061070787 | 0.817630983  | 3.551874442 | 0.245109367 | 0.999949625 NA |
| ASV_16s_30409 | 0.056032369 | 0.792901176  | 3.55190201  | 0.23329323  | 0.99995743 NA  |
| ASV_16s_30410 | 0.056032369 | 0.792901176  | 3.55190201  | 0.23329323  | 0.99995743 NA  |
| ASV_16s_30411 | 0.056032369 | 0.792901176  | 3.55190201  | 0.23329323  | 0.99995743 NA  |
| ASV_16s_30412 | 0.056032369 | 0.792901176  | 3.55190201  | 0.23329323  | 0.99995743 NA  |
| ASV_16s_30413 | 0.056032369 | 0.792901176  | 3.55190201  | 0.23329323  | 0.99995743 NA  |
| ASV_16s_30414 | 0.088539375 | 0.933095072  | 3.551670288 | 0.326096929 | 0.999867391 NA |
| ASV_16s_30415 | 0.088539375 | 0.933095072  | 3.551670288 | 0.326096929 | 0.999867391 NA |
| ASV_16s_30416 | 0.088539375 | 0.933095072  | 3.551670288 | 0.326096929 | 0.999867391 NA |
| ASV_16s_30417 | 0.088539375 | 0.933095072  | 3.551670288 | 0.326096929 | 0.999867391 NA |
| ASV_16s_30418 | 0.088539375 | 0.933095072  | 3.551670288 | 0.326096929 | 0.999867391 NA |
| ASV_16s_30419 | 0.053122536 | 0.325119291  | 3.552041974 | 0.241723924 | 0.999951955 NA |
| ASV_16s_30420 | 0.053122536 | 0.325119291  | 3.552041974 | 0.241723924 | 0.999951955 NA |
| ASV_16s_30421 | 0.053122536 | 0.325119291  | 3.552041974 | 0.241723924 | 0.999951955 NA |
| ASV_16s_30422 | 0.053122536 | 0.325119291  | 3.552041974 | 0.241723924 | 0.999951955 NA |
| ASV_16s_30423 | 0.053122536 | 0.325119291  | 3.552041974 | 0.241723924 | 0.999951955 NA |
| ASV_16s_30424 | 0.053122536 | 0.325119291  | 3.552041974 | 0.241723924 | 0.999951955 NA |
| ASV_16s_30425 | 0.053122536 | 0.325119291  | 3.552041974 | 0.241723924 | 0.999951955 NA |
| ASV_16s_30426 | 0.053122536 | 0.325119291  | 3.552041974 | 0.241723924 | 0.999951955 NA |
| ASV_16s_30427 | 0.064311309 | 0.324954566  | 3.552039813 | 0.275412877 | 0.999925129 NA |
| ASV_16s_30428 | 0.064311309 | 0.324954566  | 3.552039813 | 0.275412877 | 0.999925129 NA |
| ASV_16s_30429 | 0.064311309 | 0.324954566  | 3.552039813 | 0.275412877 | 0.999925129 NA |
| ASV_16s_30430 | 0.071131066 | 0.325123019  | 3.552033903 | 0.298636483 | 0.999901493 NA |
| ASV_16s_30431 | 0.071131066 | 0.325123019  | 3.552033903 | 0.298636483 | 0.999901493 NA |
| ASV_16s_30432 | 0.071131066 | 0.325123019  | 3.552033903 | 0.298636483 | 0.999901493 NA |
| ASV_16s_30433 | 0.071131066 | 0.325123019  | 3.552033903 | 0.298636483 | 0.999901493 NA |
| ASV_16s_30434 | 0.071131066 | 0.325123019  | 3.552033903 | 0.298636483 | 0.999901493 NA |
| ASV_16s_30435 | 0.071131066 | 0.325123019  | 3.552033903 | 0.298636483 | 0.999901493 NA |
| ASV_16s_30436 | 0.093176227 | 0.325324617  | 3.552031106 | 0.380856902 | 0.999776466 NA |
| ASV_16s_30437 | 0.093176227 | 0.325324617  | 3.552031106 | 0.380856902 | 0.999776466 NA |
| ASV_16s_30438 | 0.041166793 | 0.324109659  | 3.552037224 | 0.213608263 | 0.999968492 NA |
| ASV_16s_30439 | 0.041166793 | 0.324109659  | 3.552037224 | 0.213608263 | 0.999968492 NA |
| ASV_16s_30440 | 0.041166793 | 0.324109659  | 3.552037224 | 0.213608263 | 0.999968492 NA |
| ASV_16s_30441 | 0.041166793 | 0.324109659  | 3.552037224 | 0.213608263 | 0.999968492 NA |

|               |             |              |             |             |                |
|---------------|-------------|--------------|-------------|-------------|----------------|
| ASV_16s_30442 | 0.060799405 | 0.325123747  | 3.552041994 | 0.265766948 | 0.999933665 NA |
| ASV_16s_30443 | 0.055740756 | 0.325312568  | 3.552042893 | 0.249091372 | 0.999946784 NA |
| ASV_16s_30444 | 0.055740756 | 0.325312568  | 3.552042893 | 0.249091372 | 0.999946784 NA |
| ASV_16s_30445 | 0.0748227   | 0.325324617  | 3.552031106 | 0.312098809 | 0.999885652 NA |
| ASV_16s_30446 | 0.0748227   | 0.325324617  | 3.552031106 | 0.312098809 | 0.999885652 NA |
| ASV_16s_30447 | 0.0748227   | 0.325324617  | 3.552031106 | 0.312098809 | 0.999885652 NA |
| ASV_16s_30448 | 0.076073191 | 0.325324617  | 3.552031106 | 0.31679849  | 0.999879729 NA |
| ASV_16s_30449 | 0.075054082 | 0.717394676  | 3.551897264 | 0.175724823 | 0.999983855 NA |
| ASV_16s_30450 | 0.066265238 | 0.324852985  | 3.552039033 | 0.281891489 | 0.999918985 NA |
| ASV_16s_30451 | 0.066265238 | 0.324852985  | 3.552039033 | 0.281891489 | 0.999918985 NA |
| ASV_16s_30452 | 0.066265238 | 0.324852985  | 3.552039033 | 0.281891489 | 0.999918985 NA |
| ASV_16s_30453 | 0.066265238 | 0.324852985  | 3.552039033 | 0.281891489 | 0.999918985 NA |
| ASV_16s_30454 | 0.066265238 | 0.324852985  | 3.552039033 | 0.281891489 | 0.999918985 NA |
| ASV_16s_30455 | 0.066265238 | 0.324852985  | 3.552039033 | 0.281891489 | 0.999918985 NA |
| ASV_16s_30456 | 0.066265238 | 0.324852985  | 3.552039033 | 0.281891489 | 0.999918985 NA |
| ASV_16s_30457 | 0.054754406 | 0.317813098  | 3.551998881 | 0.092751829 | 0.999998219 NA |
| ASV_16s_30458 | 0.078574173 | 0.325324617  | 3.552031106 | 0.326197853 | 0.999867253 NA |
| ASV_16s_30459 | 0.069765248 | 0.611752466  | 3.551973468 | 0.174687289 | 0.99998418 NA  |
| ASV_16s_30460 | 0.092773925 | -0.264252081 | 3.551810949 | 0.381800121 | 0.999774604 NA |
| ASV_16s_30461 | 0.071656755 | -0.264252081 | 3.551810949 | 0.30685888  | 0.999892013 NA |
| ASV_16s_30462 | 0.065420572 | -0.240263433 | 3.551839129 | 0.285236085 | 0.99991568 NA  |
| ASV_16s_30463 | 0.068880219 | -0.264252081 | 3.551810949 | 0.296951556 | 0.999903362 NA |
| ASV_16s_30464 | 0.068880219 | -0.264252081 | 3.551810949 | 0.296951556 | 0.999903362 NA |
| ASV_16s_30465 | 0.068880219 | -0.264252081 | 3.551810949 | 0.296951556 | 0.999903362 NA |
| ASV_16s_30466 | 0.082266349 | -0.264252081 | 3.551810949 | 0.344600761 | 0.999840279 NA |
| ASV_16s_30467 | 0.11494928  | -0.264252081 | 3.551810949 | 0.45972555  | 0.999580997 NA |
| ASV_16s_30468 | 0.059184389 | -0.22872267  | 3.551851067 | 0.264574016 | 0.999934672 NA |
| ASV_16s_30469 | 0.076595832 | -0.264252081 | 3.551810949 | 0.32445159  | 0.999869636 NA |
| ASV_16s_30470 | 0.041113737 | -0.128667976 | 3.551919163 | 0.218620672 | 0.999965894 NA |
| ASV_16s_30471 | 0.060482102 | -0.235211356 | 3.551844329 | 0.268637797 | 0.9999312 NA   |
| ASV_16s_30472 | 0.060482102 | -0.235211356 | 3.551844329 | 0.268637797 | 0.9999312 NA   |
| ASV_16s_30473 | 0.069368878 | 0.242957752  | 3.551882806 | 0.195556201 | 0.999976706 NA |
| ASV_16s_30474 | 0.053815272 | -0.200853032 | 3.551878463 | 0.248733589 | 0.999947044 NA |
| ASV_16s_30475 | 0.053815272 | -0.200853032 | 3.551878463 | 0.248733589 | 0.999947044 NA |
| ASV_16s_30476 | 0.073158933 | 0.29251331   | 3.551856032 | 0.22564594  | 0.999962005 NA |
| ASV_16s_30477 | 0.079881656 | 0.898758195  | 3.551743331 | 0.298016691 | 0.999902183 NA |
| ASV_16s_30478 | 0.079881656 | 0.898758195  | 3.551743331 | 0.298016691 | 0.999902183 NA |
| ASV_16s_30479 | 0.074150071 | 0.874815585  | 3.551792482 | 0.28059196  | 0.999920245 NA |
| ASV_16s_30480 | 0.074150071 | 0.874815585  | 3.551792482 | 0.28059196  | 0.999920245 NA |
| ASV_16s_30481 | 0.074150071 | 0.874815585  | 3.551792482 | 0.28059196  | 0.999920245 NA |
| ASV_16s_30482 | 0.066453718 | 0.906305373  | 3.551864398 | 0.130632985 | 0.99999418 NA  |
| ASV_16s_30483 | 0.113208626 | 0.934837566  | 3.551666247 | 0.410647908 | 0.999712373 NA |
| ASV_16s_30484 | 0.081117545 | 0.903827174  | 3.551732397 | 0.301898031 | 0.999897805 NA |
| ASV_16s_30485 | 0.081117545 | 0.903827174  | 3.551732397 | 0.301898031 | 0.999897805 NA |
| ASV_16s_30486 | 0.060956323 | 0.870850593  | 3.551669687 | 0.192278699 | 0.999978016 NA |
| ASV_16s_30487 | 0.060956323 | 0.870850593  | 3.551669687 | 0.192278699 | 0.999978016 NA |
| ASV_16s_30488 | 0.060956323 | 0.870850593  | 3.551669687 | 0.192278699 | 0.999978016 NA |
| ASV_16s_30489 | 0.060956323 | 0.870850593  | 3.551669687 | 0.192278699 | 0.999978016 NA |
| ASV_16s_30490 | 0.060956323 | 0.870850593  | 3.551669687 | 0.192278699 | 0.999978016 NA |
| ASV_16s_30491 | 0.060956323 | 0.870850593  | 3.551669687 | 0.192278699 | 0.999978016 NA |
| ASV_16s_30492 | 0.060956323 | 0.870850593  | 3.551669687 | 0.192278699 | 0.999978016 NA |
| ASV_16s_30493 | 0.060956323 | 0.870850593  | 3.551669687 | 0.192278699 | 0.999978016 NA |
| ASV_16s_30494 | 0.060956323 | 0.870850593  | 3.551669687 | 0.192278699 | 0.999978016 NA |
| ASV_16s_30495 | 0.060956323 | 0.870850593  | 3.551669687 | 0.192278699 | 0.999978016 NA |
| ASV_16s_30496 | 0.031813329 | 0.707743698  | 3.551864433 | 0.128083065 | 0.999994563 NA |
| ASV_16s_30497 | 0.079139933 | 0.732778861  | 3.551682208 | 0.294007025 | 0.999906568 NA |
| ASV_16s_30498 | 0.039426758 | 0.758348661  | 3.551830827 | 0.157514296 | 0.999988913 NA |
| ASV_16s_30499 | 0.054539252 | 0.840289811  | 3.551731572 | 0.178923052 | 0.999982824 NA |
| ASV_16s_30500 | 0.054539252 | 0.840289811  | 3.551731572 | 0.178923052 | 0.999982824 NA |
| ASV_16s_30501 | 0.054539252 | 0.840289811  | 3.551731572 | 0.178923052 | 0.999982824 NA |
| ASV_16s_30502 | 0.054539252 | 0.840289811  | 3.551731572 | 0.178923052 | 0.999982824 NA |
| ASV_16s_30503 | 0.054539252 | 0.840289811  | 3.551731572 | 0.178923052 | 0.999982824 NA |
| ASV_16s_30504 | 0.054539252 | 0.840289811  | 3.551731572 | 0.178923052 | 0.999982824 NA |
| ASV_16s_30505 | 0.054539252 | 0.840289811  | 3.551731572 | 0.178923052 | 0.999982824 NA |
| ASV_16s_30506 | 0.054539252 | 0.840289811  | 3.551731572 | 0.178923052 | 0.999982824 NA |
| ASV_16s_30507 | 0.054539252 | 0.840289811  | 3.551731572 | 0.178923052 | 0.999982824 NA |
| ASV_16s_30508 | 0.075169773 | 0.931207205  | 3.551544718 | 0.228978677 | 0.999960056 NA |

|               |             |              |             |             |             |    |
|---------------|-------------|--------------|-------------|-------------|-------------|----|
| ASV_16s_30509 | 0.075169773 | 0.931207205  | 3.551544718 | 0.228978677 | 0.999960056 | NA |
| ASV_16s_30510 | 0.0716551   | 0.135311242  | 3.551610359 | 0.28020878  | 0.999920613 | NA |
| ASV_16s_30511 | 0.063975188 | 0.342315591  | 3.551815402 | 0.218473628 | 0.999965972 | NA |
| ASV_16s_30512 | 0.063025195 | 0.720664385  | 3.551707054 | 0.240620156 | 0.999952699 | NA |
| ASV_16s_30513 | 0.084796011 | 0.342315591  | 3.551815402 | 0.28585493  | 0.999915058 | NA |
| ASV_16s_30514 | 0.068939035 | 0.342315591  | 3.551815402 | 0.234596454 | 0.999956614 | NA |
| ASV_16s_30515 | 0.068939035 | 0.342315591  | 3.551815402 | 0.234596454 | 0.999956614 | NA |
| ASV_16s_30516 | 0.068939035 | 0.342315591  | 3.551815402 | 0.234596454 | 0.999956614 | NA |
| ASV_16s_30517 | 0.068939035 | 0.342315591  | 3.551815402 | 0.234596454 | 0.999956614 | NA |
| ASV_16s_30518 | 0.068939035 | 0.342315591  | 3.551815402 | 0.234596454 | 0.999956614 | NA |
| ASV_16s_30519 | 0.068939035 | 0.342315591  | 3.551815402 | 0.234596454 | 0.999956614 | NA |
| ASV_16s_30520 | 0.068939035 | 0.342315591  | 3.551815402 | 0.234596454 | 0.999956614 | NA |
| ASV_16s_30521 | 0.06253837  | 0.342260602  | 3.551818544 | 0.214028074 | 0.99996828  | NA |
| ASV_16s_30522 | 0.056782277 | 0.341884651  | 3.551840507 | 0.19784163  | 0.999975761 | NA |
| ASV_16s_30523 | 0.046873099 | 0.34116383   | 3.551884708 | 0.17490209  | 0.999984113 | NA |
| ASV_16s_30524 | 0.046873099 | 0.34116383   | 3.551884708 | 0.17490209  | 0.999984113 | NA |
| ASV_16s_30525 | 0.046873099 | 0.34116383   | 3.551884708 | 0.17490209  | 0.999984113 | NA |
| ASV_16s_30526 | 0.046873099 | 0.34116383   | 3.551884708 | 0.17490209  | 0.999984113 | NA |
| ASV_16s_30527 | 0.046873099 | 0.34116383   | 3.551884708 | 0.17490209  | 0.999984113 | NA |
| ASV_16s_30528 | 0.046873099 | 0.34116383   | 3.551884708 | 0.17490209  | 0.999984113 | NA |
| ASV_16s_30529 | 0.046873099 | 0.34116383   | 3.551884708 | 0.17490209  | 0.999984113 | NA |
| ASV_16s_30530 | 0.080295762 | 0.342315591  | 3.551815402 | 0.271345547 | 0.999928817 | NA |
| ASV_16s_30531 | 0.080295762 | 0.342315591  | 3.551815402 | 0.271345547 | 0.999928817 | NA |
| ASV_16s_30532 | 0.080295762 | 0.342315591  | 3.551815402 | 0.271345547 | 0.999928817 | NA |
| ASV_16s_30533 | 0.080295762 | 0.342315591  | 3.551815402 | 0.271345547 | 0.999928817 | NA |
| ASV_16s_30534 | 0.050715032 | 0.341456773  | 3.551866565 | 0.182994053 | 0.999981446 | NA |
| ASV_16s_30535 | 0.050715032 | 0.341456773  | 3.551866565 | 0.182994053 | 0.999981446 | NA |
| ASV_16s_30536 | 0.050715032 | 0.341456773  | 3.551866565 | 0.182994053 | 0.999981446 | NA |
| ASV_16s_30537 | 0.097895075 | 0.342315591  | 3.551815402 | 0.327918199 | 0.999864876 | NA |
| ASV_16s_30538 | 0.097895075 | 0.342315591  | 3.551815402 | 0.327918199 | 0.999864876 | NA |
| ASV_16s_30539 | 0.097895075 | 0.342315591  | 3.551815402 | 0.327918199 | 0.999864876 | NA |
| ASV_16s_30540 | 0.097895075 | 0.342315591  | 3.551815402 | 0.327918199 | 0.999864876 | NA |
| ASV_16s_30541 | 0.097895075 | 0.342315591  | 3.551815402 | 0.327918199 | 0.999864876 | NA |
| ASV_16s_30542 | 0.017658542 | 0.329983989  | 3.551984072 | 0.082859878 | 0.999998795 | NA |
| ASV_16s_30543 | 0.071146233 | 0.342315591  | 3.551815402 | 0.241753723 | 0.999951935 | NA |
| ASV_16s_30544 | 0.071146233 | 0.342315591  | 3.551815402 | 0.241753723 | 0.999951935 | NA |
| ASV_16s_30545 | 0.071146233 | 0.342315591  | 3.551815402 | 0.241753723 | 0.999951935 | NA |
| ASV_16s_30546 | 0.071146233 | 0.342315591  | 3.551815402 | 0.241753723 | 0.999951935 | NA |
| ASV_16s_30547 | 0.071146233 | 0.342315591  | 3.551815402 | 0.241753723 | 0.999951935 | NA |
| ASV_16s_30548 | 0.071146233 | 0.342315591  | 3.551815402 | 0.241753723 | 0.999951935 | NA |
| ASV_16s_30549 | 0.065415543 | 0.720664385  | 3.551707054 | 0.25068388  | 0.999945617 | NA |
| ASV_16s_30550 | 0.064311309 | -0.25985681  | 3.551549473 | 0.220685767 | 0.999964781 | NA |
| ASV_16s_30551 | 0.064311309 | -0.25985681  | 3.551549473 | 0.220685767 | 0.999964781 | NA |
| ASV_16s_30552 | 0.02849382  | -0.075247593 | 3.551783318 | 0.132701772 | 0.999993856 | NA |
| ASV_16s_30553 | 0.069897763 | -0.25985681  | 3.551549473 | 0.238286084 | 0.999954244 | NA |
| ASV_16s_30554 | 0.069897763 | -0.25985681  | 3.551549473 | 0.238286084 | 0.999954244 | NA |
| ASV_16s_30555 | 0.069897763 | -0.25985681  | 3.551549473 | 0.238286084 | 0.999954244 | NA |
| ASV_16s_30556 | 0.069897763 | -0.25985681  | 3.551549473 | 0.238286084 | 0.999954244 | NA |
| ASV_16s_30557 | 0.069897763 | -0.25985681  | 3.551549473 | 0.238286084 | 0.999954244 | NA |
| ASV_16s_30558 | 0.069897763 | -0.25985681  | 3.551549473 | 0.238286084 | 0.999954244 | NA |
| ASV_16s_30559 | 0.069897763 | -0.25985681  | 3.551549473 | 0.238286084 | 0.999954244 | NA |
| ASV_16s_30560 | 0.090163822 | -0.25985681  | 3.551549473 | 0.301744723 | 0.99989798  | NA |
| ASV_16s_30561 | 0.090163822 | -0.25985681  | 3.551549473 | 0.301744723 | 0.99989798  | NA |
| ASV_16s_30562 | 0.090163822 | -0.25985681  | 3.551549473 | 0.301744723 | 0.99989798  | NA |
| ASV_16s_30563 | 0.090163822 | -0.25985681  | 3.551549473 | 0.301744723 | 0.99989798  | NA |
| ASV_16s_30564 | 0.090163822 | -0.25985681  | 3.551549473 | 0.301744723 | 0.99989798  | NA |
| ASV_16s_30565 | 0.090163822 | -0.25985681  | 3.551549473 | 0.301744723 | 0.99989798  | NA |
| ASV_16s_30566 | 0.093063035 | -0.25985681  | 3.551549473 | 0.310773281 | 0.999887285 | NA |
| ASV_16s_30567 | 0.093063035 | -0.25985681  | 3.551549473 | 0.310773281 | 0.999887285 | NA |
| ASV_16s_30568 | 0.054667152 | -0.234855042 | 3.551589347 | 0.192132765 | 0.999978073 | NA |
| ASV_16s_30569 | 0.054667152 | -0.234855042 | 3.551589347 | 0.192132765 | 0.999978073 | NA |
| ASV_16s_30570 | 0.086091327 | -0.25985681  | 3.551549473 | 0.289041478 | 0.999911806 | NA |
| ASV_16s_30571 | 0.086091327 | -0.25985681  | 3.551549473 | 0.289041478 | 0.999911806 | NA |
| ASV_16s_30572 | 0.086091327 | -0.25985681  | 3.551549473 | 0.289041478 | 0.999911806 | NA |
| ASV_16s_30573 | 0.086091327 | -0.25985681  | 3.551549473 | 0.289041478 | 0.999911806 | NA |
| ASV_16s_30574 | 0.086091327 | -0.25985681  | 3.551549473 | 0.289041478 | 0.999911806 | NA |
| ASV_16s_30575 | 0.086091327 | -0.25985681  | 3.551549473 | 0.289041478 | 0.999911806 | NA |

|               |             |              |             |             |                |
|---------------|-------------|--------------|-------------|-------------|----------------|
| ASV_16s_30576 | 0.034605091 | -0.120263429 | 3.551727081 | 0.155829158 | 0.999989316 NA |
| ASV_16s_30577 | 0.031714821 | -0.099926113 | 3.551753062 | 0.14688229  | 0.999991283 NA |
| ASV_16s_30578 | 0.031714821 | -0.099926113 | 3.551753062 | 0.14688229  | 0.999991283 NA |
| ASV_16s_30579 | 0.071309086 | 0.915477025  | 3.551579933 | 0.21818254  | 0.999966127 NA |
| ASV_16s_30580 | 0.062550198 | 0.878030737  | 3.551655663 | 0.195944747 | 0.999976547 NA |
| ASV_16s_30581 | 0.062550198 | 0.878030737  | 3.551655663 | 0.195944747 | 0.999976547 NA |
| ASV_16s_30582 | 0.062550198 | 0.878030737  | 3.551655663 | 0.195944747 | 0.999976547 NA |
| ASV_16s_30583 | 0.062550198 | 0.878030737  | 3.551655663 | 0.195944747 | 0.999976547 NA |
| ASV_16s_30584 | 0.062550198 | 0.878030737  | 3.551655663 | 0.195944747 | 0.999976547 NA |
| ASV_16s_30585 | 0.062550198 | 0.878030737  | 3.551655663 | 0.195944747 | 0.999976547 NA |
| ASV_16s_30586 | 0.02514151  | 0.655718172  | 3.551899734 | 0.101423384 | 0.999997573 NA |
| ASV_16s_30587 | 0.02514151  | 0.655718172  | 3.551899734 | 0.101423384 | 0.999997573 NA |
| ASV_16s_30588 | 0.02514151  | 0.655718172  | 3.551899734 | 0.101423384 | 0.999997573 NA |
| ASV_16s_30589 | 0.056782277 | -0.070773368 | 3.551446138 | 0.357643648 | 0.999819014 NA |
| ASV_16s_30590 | 0.056782277 | -0.070773368 | 3.551446138 | 0.357643648 | 0.999819014 NA |
| ASV_16s_30591 | 0.056782277 | -0.070773368 | 3.551446138 | 0.357643648 | 0.999819014 NA |
| ASV_16s_30592 | 0.056782277 | -0.070773368 | 3.551446138 | 0.357643648 | 0.999819014 NA |
| ASV_16s_30593 | 0.056782277 | -0.070773368 | 3.551446138 | 0.357643648 | 0.999819014 NA |
| ASV_16s_30594 | 0.056782277 | -0.070773368 | 3.551446138 | 0.357643648 | 0.999819014 NA |
| ASV_16s_30595 | 0.056782277 | -0.070773368 | 3.551446138 | 0.357643648 | 0.999819014 NA |
| ASV_16s_30596 | 0.056782277 | -0.070773368 | 3.551446138 | 0.357643648 | 0.999819014 NA |
| ASV_16s_30597 | 0.056782277 | -0.070773368 | 3.551446138 | 0.357643648 | 0.999819014 NA |
| ASV_16s_30598 | 0.056782277 | -0.070773368 | 3.551446138 | 0.357643648 | 0.999819014 NA |
| ASV_16s_30599 | 0.056782277 | -0.070773368 | 3.551446138 | 0.357643648 | 0.999819014 NA |
| ASV_16s_30600 | 0.056782277 | -0.070773368 | 3.551446138 | 0.357643648 | 0.999819014 NA |
| ASV_16s_30601 | 0.056782277 | -0.070773368 | 3.551446138 | 0.357643648 | 0.999819014 NA |
| ASV_16s_30602 | 0.056782277 | -0.070773368 | 3.551446138 | 0.357643648 | 0.999819014 NA |
| ASV_16s_30603 | 0.056782277 | -0.070773368 | 3.551446138 | 0.357643648 | 0.999819014 NA |
| ASV_16s_30604 | 0.052600585 | -0.067128523 | 3.551503181 | 0.338761529 | 0.999849213 NA |
| ASV_16s_30605 | 0.048418893 | -0.063179738 | 3.551569411 | 0.320831083 | 0.999874481 NA |
| ASV_16s_30606 | 0.048418893 | -0.063179738 | 3.551569411 | 0.320831083 | 0.999874481 NA |
| ASV_16s_30607 | 0.048418893 | -0.063179738 | 3.551569411 | 0.320831083 | 0.999874481 NA |
| ASV_16s_30608 | 0.048418893 | -0.063179738 | 3.551569411 | 0.320831083 | 0.999874481 NA |
| ASV_16s_30609 | 0.048418893 | -0.063179738 | 3.551569411 | 0.320831083 | 0.999874481 NA |
| ASV_16s_30610 | 0.048418893 | -0.063179738 | 3.551569411 | 0.320831083 | 0.999874481 NA |
| ASV_16s_30611 | 0.048418893 | -0.063179738 | 3.551569411 | 0.320831083 | 0.999874481 NA |
| ASV_16s_30612 | 0.048418893 | -0.063179738 | 3.551569411 | 0.320831083 | 0.999874481 NA |
| ASV_16s_30613 | 0.048418893 | -0.063179738 | 3.551569411 | 0.320831083 | 0.999874481 NA |
| ASV_16s_30614 | 0.048418893 | -0.063179738 | 3.551569411 | 0.320831083 | 0.999874481 NA |
| ASV_16s_30615 | 0.048418893 | -0.063179738 | 3.551569411 | 0.320831083 | 0.999874481 NA |
| ASV_16s_30616 | 0.048418893 | -0.063179738 | 3.551569411 | 0.320831083 | 0.999874481 NA |
| ASV_16s_30617 | 0.048418893 | -0.063179738 | 3.551569411 | 0.320831083 | 0.999874481 NA |
| ASV_16s_30618 | 0.048418893 | -0.063179738 | 3.551569411 | 0.320831083 | 0.999874481 NA |
| ASV_16s_30619 | 0.048418893 | -0.063179738 | 3.551569411 | 0.320831083 | 0.999874481 NA |
| ASV_16s_30620 | 0.048418893 | -0.063179738 | 3.551569411 | 0.320831083 | 0.999874481 NA |
| ASV_16s_30621 | 0.048418893 | -0.063179738 | 3.551569411 | 0.320831083 | 0.999874481 NA |
| ASV_16s_30622 | 0.048418893 | -0.063179738 | 3.551569411 | 0.320831083 | 0.999874481 NA |
| ASV_16s_30623 | 0.048418893 | -0.063179738 | 3.551569411 | 0.320831083 | 0.999874481 NA |
| ASV_16s_30624 | 0.048418893 | -0.063179738 | 3.551569411 | 0.320831083 | 0.999874481 NA |
| ASV_16s_30625 | 0.048418893 | -0.063179738 | 3.551569411 | 0.320831083 | 0.999874481 NA |
| ASV_16s_30626 | 0.048418893 | -0.063179738 | 3.551569411 | 0.320831083 | 0.999874481 NA |
| ASV_16s_30627 | 0.048418893 | -0.063179738 | 3.551569411 | 0.320831083 | 0.999874481 NA |
| ASV_16s_30628 | 0.052392773 | 0.102147012  | 3.551507368 | 0.397451948 | 0.999742135 NA |
| ASV_16s_30629 | 0.054629396 | -0.068934914 | 3.551474459 | 0.347825386 | 0.999835192 NA |
| ASV_16s_30630 | 0.054629396 | -0.068934914 | 3.551474459 | 0.347825386 | 0.999835192 NA |
| ASV_16s_30631 | 0.054629396 | -0.068934914 | 3.551474459 | 0.347825386 | 0.999835192 NA |
| ASV_16s_30632 | 0.054629396 | -0.068934914 | 3.551474459 | 0.347825386 | 0.999835192 NA |
| ASV_16s_30633 | 0.054629396 | -0.068934914 | 3.551474459 | 0.347825386 | 0.999835192 NA |
| ASV_16s_30634 | 0.054629396 | -0.068934914 | 3.551474459 | 0.347825386 | 0.999835192 NA |
| ASV_16s_30635 | 0.031732743 | 0.232471754  | 3.551351038 | 0.103247006 | 0.999997418 NA |
| ASV_16s_30636 | 0.031732743 | 0.232471754  | 3.551351038 | 0.103247006 | 0.999997418 NA |
| ASV_16s_30637 | 0.031732743 | 0.232471754  | 3.551351038 | 0.103247006 | 0.999997418 NA |
| ASV_16s_30638 | 0.033500021 | 0.231265184  | 3.551320983 | 0.11105066  | 0.999996678 NA |
| ASV_16s_30639 | 0.036046192 | 0.229632909  | 3.551282561 | 0.124273813 | 0.999995101 NA |
| ASV_16s_30640 | 0.036046192 | 0.229632909  | 3.551282561 | 0.124273813 | 0.999995101 NA |
| ASV_16s_30641 | 0.036046192 | 0.229632909  | 3.551282561 | 0.124273813 | 0.999995101 NA |
| ASV_16s_30642 | 0.036046192 | 0.229632909  | 3.551282561 | 0.124273813 | 0.999995101 NA |

|               |             |              |             |             |                |
|---------------|-------------|--------------|-------------|-------------|----------------|
| ASV_16s_30643 | 0.036046192 | 0.229632909  | 3.551282561 | 0.124273813 | 0.999995101 NA |
| ASV_16s_30644 | 0.036046192 | 0.229632909  | 3.551282561 | 0.124273813 | 0.999995101 NA |
| ASV_16s_30645 | 0.03597421  | 0.229677439  | 3.551283577 | 0.124061128 | 0.99999513 NA  |
| ASV_16s_30646 | 0.03597421  | 0.229677439  | 3.551283577 | 0.124061128 | 0.99999513 NA  |
| ASV_16s_30647 | 0.03597421  | 0.229677439  | 3.551283577 | 0.124061128 | 0.99999513 NA  |
| ASV_16s_30648 | 0.03597421  | 0.229677439  | 3.551283577 | 0.124061128 | 0.99999513 NA  |
| ASV_16s_30649 | 0.03597421  | 0.229677439  | 3.551283577 | 0.124061128 | 0.99999513 NA  |
| ASV_16s_30650 | 0.03597421  | 0.229677439  | 3.551283577 | 0.124061128 | 0.99999513 NA  |
| ASV_16s_30651 | 0.03597421  | 0.229677439  | 3.551283577 | 0.124061128 | 0.99999513 NA  |
| ASV_16s_30652 | 0.03597421  | 0.229677439  | 3.551283577 | 0.124061128 | 0.99999513 NA  |
| ASV_16s_30653 | 0.057956206 | 0.314663173  | 3.551669718 | 0.349064118 | 0.999833208 NA |
| ASV_16s_30654 | 0.057956206 | 0.314663173  | 3.551669718 | 0.349064118 | 0.999833208 NA |
| ASV_16s_30655 | 0.057956206 | 0.314663173  | 3.551669718 | 0.349064118 | 0.999833208 NA |
| ASV_16s_30656 | 0.061521176 | 0.313358801  | 3.551620554 | 0.365454508 | 0.999805386 NA |
| ASV_16s_30657 | 0.061521176 | 0.313358801  | 3.551620554 | 0.365454508 | 0.999805386 NA |
| ASV_16s_30658 | 0.061521176 | 0.313358801  | 3.551620554 | 0.365454508 | 0.999805386 NA |
| ASV_16s_30659 | 0.061521176 | 0.313358801  | 3.551620554 | 0.365454508 | 0.999805386 NA |
| ASV_16s_30660 | 0.061521176 | 0.313358801  | 3.551620554 | 0.365454508 | 0.999805386 NA |
| ASV_16s_30661 | 0.061521176 | 0.313358801  | 3.551620554 | 0.365454508 | 0.999805386 NA |
| ASV_16s_30662 | 0.061521176 | 0.313358801  | 3.551620554 | 0.365454508 | 0.999805386 NA |
| ASV_16s_30663 | 0.061521176 | 0.313358801  | 3.551620554 | 0.365454508 | 0.999805386 NA |
| ASV_16s_30664 | 0.061521176 | 0.313358801  | 3.551620554 | 0.365454508 | 0.999805386 NA |
| ASV_16s_30665 | 0.061521176 | 0.313358801  | 3.551620554 | 0.365454508 | 0.999805386 NA |
| ASV_16s_30666 | 0.061521176 | 0.313358801  | 3.551620554 | 0.365454508 | 0.999805386 NA |
| ASV_16s_30667 | 0.061521176 | 0.313358801  | 3.551620554 | 0.365454508 | 0.999805386 NA |
| ASV_16s_30668 | 0.062559661 | 0.312992749  | 3.551607228 | 0.370322406 | 0.999796543 NA |
| ASV_16s_30669 | 0.062559661 | 0.312992749  | 3.551607228 | 0.370322406 | 0.999796543 NA |
| ASV_16s_30670 | 0.062559661 | 0.312992749  | 3.551607228 | 0.370322406 | 0.999796543 NA |
| ASV_16s_30671 | 0.062559661 | 0.312992749  | 3.551607228 | 0.370322406 | 0.999796543 NA |
| ASV_16s_30672 | 0.062559661 | 0.312992749  | 3.551607228 | 0.370322406 | 0.999796543 NA |
| ASV_16s_30673 | 0.062559661 | 0.312992749  | 3.551607228 | 0.370322406 | 0.999796543 NA |
| ASV_16s_30674 | 0.053643673 | 0.316350365  | 3.55173738  | 0.329974218 | 0.999861997 NA |
| ASV_16s_30675 | 0.053643673 | 0.316350365  | 3.55173738  | 0.329974218 | 0.999861997 NA |
| ASV_16s_30676 | 0.053643673 | 0.316350365  | 3.55173738  | 0.329974218 | 0.999861997 NA |
| ASV_16s_30677 | 0.053643673 | 0.316350365  | 3.55173738  | 0.329974218 | 0.999861997 NA |
| ASV_16s_30678 | 0.061326447 | 0.313428114  | 3.551623101 | 0.364546226 | 0.999807006 NA |
| ASV_16s_30679 | 0.061326447 | 0.313428114  | 3.551623101 | 0.364546226 | 0.999807006 NA |
| ASV_16s_30680 | 0.061326447 | 0.313428114  | 3.551623101 | 0.364546226 | 0.999807006 NA |
| ASV_16s_30681 | 0.061326447 | 0.313428114  | 3.551623101 | 0.364546226 | 0.999807006 NA |
| ASV_16s_30682 | 0.061326447 | 0.313428114  | 3.551623101 | 0.364546226 | 0.999807006 NA |
| ASV_16s_30683 | 0.061326447 | 0.313428114  | 3.551623101 | 0.364546226 | 0.999807006 NA |
| ASV_16s_30684 | 0.037971819 | 0.594655131  | 3.551225871 | 0.112277592 | 0.99999655 NA  |
| ASV_16s_30685 | 0.037971819 | 0.594655131  | 3.551225871 | 0.112277592 | 0.99999655 NA  |
| ASV_16s_30686 | 0.037971819 | 0.594655131  | 3.551225871 | 0.112277592 | 0.99999655 NA  |
| ASV_16s_30687 | 0.037971819 | 0.594655131  | 3.551225871 | 0.112277592 | 0.99999655 NA  |
| ASV_16s_30688 | 0.055024326 | 0.681518209  | 3.551716447 | 0.30820287  | 0.999890405 NA |
| ASV_16s_30689 | 0.064163657 | 0.685681806  | 3.551582306 | 0.342116509 | 0.999844123 NA |
| ASV_16s_30690 | 0.064163657 | 0.685681806  | 3.551582306 | 0.342116509 | 0.999844123 NA |
| ASV_16s_30691 | 0.064163657 | 0.685681806  | 3.551582306 | 0.342116509 | 0.999844123 NA |
| ASV_16s_30692 | 0.064163657 | 0.685681806  | 3.551582306 | 0.342116509 | 0.999844123 NA |
| ASV_16s_30693 | 0.064163657 | 0.685681806  | 3.551582306 | 0.342116509 | 0.999844123 NA |
| ASV_16s_30694 | 0.064163657 | 0.685681806  | 3.551582306 | 0.342116509 | 0.999844123 NA |
| ASV_16s_30695 | 0.081839086 | 0.887541634  | 3.55184048  | 0.247069633 | 0.99994824 NA  |
| ASV_16s_30696 | 0.064195529 | 0.818820737  | 3.551775978 | 0.16353001  | 0.999987388 NA |
| ASV_16s_30697 | 0.069692098 | 0.321478628  | 3.551941658 | 0.285365838 | 0.99991555 NA  |
| ASV_16s_30698 | 0.052471134 | -0.017540025 | 3.551776138 | 0.2923637   | 0.999908325 NA |
| ASV_16s_30699 | 0.065237595 | 0.325377905  | 3.552042442 | 0.261959996 | 0.999936839 NA |
| ASV_16s_30700 | 0.067428604 | 0.227846496  | 3.551852917 | 0.209723814 | 0.999970408 NA |
| ASV_16s_30701 | 0.057355444 | 0.35042118   | 3.551889968 | 0.212576534 | 0.999969009 NA |
| ASV_16s_30702 | 0.066517823 | 0.806833322  | 3.551863301 | 0.258118177 | 0.999939933 NA |
| ASV_16s_30703 | 0.066517823 | 0.806833322  | 3.551863301 | 0.258118177 | 0.999939933 NA |
| ASV_16s_30704 | 0.090474472 | -0.304925849 | 3.551661528 | 0.384831716 | 0.999768549 NA |
| ASV_16s_30705 | 0.090474472 | -0.304925849 | 3.551661528 | 0.384831716 | 0.999768549 NA |
| ASV_16s_30706 | 0.090474472 | -0.304925849 | 3.551661528 | 0.384831716 | 0.999768549 NA |
| ASV_16s_30707 | 0.062923053 | 0.792441389  | 3.551878321 | 0.248827396 | 0.999946976 NA |
| ASV_16s_30708 | 0.080295762 | 0.857732739  | 3.551804089 | 0.298068314 | 0.999902126 NA |
| ASV_16s_30709 | 0.080295762 | 0.857732739  | 3.551804089 | 0.298068314 | 0.999902126 NA |

|               |             |              |             |             |             |    |
|---------------|-------------|--------------|-------------|-------------|-------------|----|
| ASV_16s_30710 | 0.080295762 | 0.857732739  | 3.551804089 | 0.298068314 | 0.999902126 | NA |
| ASV_16s_30711 | 0.080295762 | 0.857732739  | 3.551804089 | 0.298068314 | 0.999902126 | NA |
| ASV_16s_30712 | 0.128625927 | 0.866355163  | 3.551594691 | 0.455694166 | 0.999593085 | NA |
| ASV_16s_30713 | 0.095953641 | 0.848788193  | 3.551629119 | 0.333935423 | 0.999856331 | NA |
| ASV_16s_30714 | 0.062071932 | 0.75189285   | 3.551767198 | 0.233177413 | 0.999957502 | NA |
| ASV_16s_30715 | 0.062071932 | 0.75189285   | 3.551767198 | 0.233177413 | 0.999957502 | NA |
| ASV_16s_30716 | 0.060618528 | 0.746658345  | 3.551773526 | 0.229754288 | 0.999959593 | NA |
| ASV_16s_30717 | 0.042696653 | 0.296040609  | 3.551924802 | 0.214261995 | 0.999968162 | NA |
| ASV_16s_30718 | 0.09626346  | 0.284951366  | 3.551758877 | 0.401519751 | 0.999733198 | NA |
| ASV_16s_30719 | 0.083281011 | 0.28630003   | 3.551800457 | 0.346895203 | 0.999836671 | NA |
| ASV_16s_30720 | 0.029433607 | 0.299520135  | 3.551953066 | 0.175225861 | 0.999984012 | NA |
| ASV_16s_30721 | 0.06837062  | 0.288029989  | 3.551857982 | 0.290281851 | 0.999910517 | NA |
| ASV_16s_30722 | 0.06837062  | 0.288029989  | 3.551857982 | 0.290281851 | 0.999910517 | NA |
| ASV_16s_30723 | 0.06837062  | 0.288029989  | 3.551857982 | 0.290281851 | 0.999910517 | NA |
| ASV_16s_30724 | 0.080295762 | -0.286496373 | 3.551640306 | 0.335383326 | 0.999854221 | NA |
| ASV_16s_30725 | 0.080295762 | -0.286496373 | 3.551640306 | 0.335383326 | 0.999854221 | NA |
| ASV_16s_30726 | 0.080295762 | -0.286496373 | 3.551640306 | 0.335383326 | 0.999854221 | NA |
| ASV_16s_30727 | 0.080295762 | -0.286496373 | 3.551640306 | 0.335383326 | 0.999854221 | NA |
| ASV_16s_30728 | 0.080295762 | -0.286496373 | 3.551640306 | 0.335383326 | 0.999854221 | NA |
| ASV_16s_30729 | 0.080295762 | -0.286496373 | 3.551640306 | 0.335383326 | 0.999854221 | NA |
| ASV_16s_30730 | 0.080295762 | -0.286496373 | 3.551640306 | 0.335383326 | 0.999854221 | NA |
| ASV_16s_30731 | 0.080295762 | -0.286496373 | 3.551640306 | 0.335383326 | 0.999854221 | NA |
| ASV_16s_30732 | 0.080295762 | -0.286496373 | 3.551640306 | 0.335383326 | 0.999854221 | NA |
| ASV_16s_30733 | 0.080295762 | -0.286496373 | 3.551640306 | 0.335383326 | 0.999854221 | NA |
| ASV_16s_30734 | 0.047741697 | -0.157884358 | 3.551775781 | 0.227849241 | 0.999960724 | NA |
| ASV_16s_30735 | 0.047741697 | -0.157884358 | 3.551775781 | 0.227849241 | 0.999960724 | NA |
| ASV_16s_30736 | 0.107236611 | -0.305424233 | 3.551611902 | 0.45090722  | 0.999607127 | NA |
| ASV_16s_30737 | 0.048119467 | 0.697136482  | 3.551836797 | 0.205023142 | 0.999972615 | NA |
| ASV_16s_30738 | 0.128299707 | 0.866355163  | 3.551594691 | 0.454464117 | 0.999596725 | NA |
| ASV_16s_30739 | 0.092773925 | -0.264252081 | 3.551810949 | 0.381800121 | 0.999774604 | NA |
| ASV_16s_30740 | 0.110594824 | -0.264252081 | 3.551810949 | 0.444485512 | 0.999625438 | NA |
| ASV_16s_30741 | 0.110594824 | -0.264252081 | 3.551810949 | 0.444485512 | 0.999625438 | NA |
| ASV_16s_30742 | 0.110594824 | -0.264252081 | 3.551810949 | 0.444485512 | 0.999625438 | NA |
| ASV_16s_30743 | 0.110594824 | -0.264252081 | 3.551810949 | 0.444485512 | 0.999625438 | NA |
| ASV_16s_30744 | 0.110594824 | -0.264252081 | 3.551810949 | 0.444485512 | 0.999625438 | NA |
| ASV_16s_30745 | 0.110594824 | -0.264252081 | 3.551810949 | 0.444485512 | 0.999625438 | NA |
| ASV_16s_30746 | 0.110594824 | -0.264252081 | 3.551810949 | 0.444485512 | 0.999625438 | NA |
| ASV_16s_30747 | 0.110594824 | -0.264252081 | 3.551810949 | 0.444485512 | 0.999625438 | NA |
| ASV_16s_30748 | 0.111674699 | -0.239723601 | 3.551619515 | 0.430043727 | 0.999664469 | NA |
| ASV_16s_30749 | 0.068422541 | 0.195055067  | 3.551890572 | 0.33732543  | 0.999851356 | NA |
| ASV_16s_30750 | 0.097895075 | 0.342315591  | 3.551815402 | 0.327918199 | 0.999864876 | NA |
| ASV_16s_30751 | 0.097895075 | 0.342315591  | 3.551815402 | 0.327918199 | 0.999864876 | NA |
| ASV_16s_30752 | 0.071309086 | 0.915477025  | 3.551579933 | 0.21818254  | 0.999966127 | NA |
| ASV_16s_30753 | 0.071309086 | 0.915477025  | 3.551579933 | 0.21818254  | 0.999966127 | NA |
| ASV_16s_30754 | 0.071309086 | 0.915477025  | 3.551579933 | 0.21818254  | 0.999966127 | NA |
| ASV_16s_30755 | 0.071309086 | 0.915477025  | 3.551579933 | 0.21818254  | 0.999966127 | NA |
| ASV_16s_30756 | 0.071309086 | 0.915477025  | 3.551579933 | 0.21818254  | 0.999966127 | NA |
| ASV_16s_30757 | 0.071309086 | 0.915477025  | 3.551579933 | 0.21818254  | 0.999966127 | NA |
| ASV_16s_30758 | 0.071309086 | 0.915477025  | 3.551579933 | 0.21818254  | 0.999966127 | NA |
| ASV_16s_30759 | 0.071309086 | 0.915477025  | 3.551579933 | 0.21818254  | 0.999966127 | NA |
| ASV_16s_30760 | 0.071309086 | 0.915477025  | 3.551579933 | 0.21818254  | 0.999966127 | NA |
| ASV_16s_30761 | 0.071309086 | 0.915477025  | 3.551579933 | 0.21818254  | 0.999966127 | NA |
| ASV_16s_30762 | 0.071309086 | 0.915477025  | 3.551579933 | 0.21818254  | 0.999966127 | NA |
| ASV_16s_30763 | 0.071309086 | 0.915477025  | 3.551579933 | 0.21818254  | 0.999966127 | NA |
| ASV_16s_30764 | 0.071309086 | 0.915477025  | 3.551579933 | 0.21818254  | 0.999966127 | NA |
| ASV_16s_30765 | 0.071309086 | 0.915477025  | 3.551579933 | 0.21818254  | 0.999966127 | NA |
| ASV_16s_30766 | 0.071309086 | 0.915477025  | 3.551579933 | 0.21818254  | 0.999966127 | NA |
| ASV_16s_30767 | 0.071309086 | 0.915477025  | 3.551579933 | 0.21818254  | 0.999966127 | NA |
| ASV_16s_30768 | 0.071309086 | 0.915477025  | 3.551579933 | 0.21818254  | 0.999966127 | NA |
| ASV_16s_30769 | 0.071309086 | 0.915477025  | 3.551579933 | 0.21818254  | 0.999966127 | NA |
| ASV_16s_30770 | 0.078588312 | 0.779422817  | 3.551808842 | 0.251466725 | 0.999945037 | NA |
| ASV_16s_30771 | 0.040634241 | -0.046991083 | 3.551698323 | 0.289602803 | 0.999911225 | NA |
| ASV_16s_30772 | 0.040634241 | -0.046991083 | 3.551698323 | 0.289602803 | 0.999911225 | NA |
| ASV_16s_30773 | 0.040634241 | -0.046991083 | 3.551698323 | 0.289602803 | 0.999911225 | NA |
| ASV_16s_30774 | 0.040634241 | -0.046991083 | 3.551698323 | 0.289602803 | 0.999911225 | NA |
| ASV_16s_30775 | 0.083663229 | 0.504206349  | 3.551580202 | 0.573381406 | 0.999130972 | NA |
| ASV_16s_30776 | 0.1263995   | -0.028059349 | 3.551162126 | 0.795789715 | 0.997486684 | NA |





















|               |             |              |             |             |             |    |
|---------------|-------------|--------------|-------------|-------------|-------------|----|
| ASV_16s_31313 | 0.044875837 | 0.310102156  | 3.551981699 | 0.208820263 | 0.999970842 | NA |
| ASV_16s_31314 | 0.044875837 | 0.310102156  | 3.551981699 | 0.208820263 | 0.999970842 | NA |
| ASV_16s_31315 | 0.044875837 | 0.310102156  | 3.551981699 | 0.208820263 | 0.999970842 | NA |
| ASV_16s_31316 | 0.044875837 | 0.310102156  | 3.551981699 | 0.208820263 | 0.999970842 | NA |
| ASV_16s_31317 | 0.044875837 | 0.310102156  | 3.551981699 | 0.208820263 | 0.999970842 | NA |
| ASV_16s_31318 | 0.044875837 | 0.310102156  | 3.551981699 | 0.208820263 | 0.999970842 | NA |
| ASV_16s_31319 | 0.044875837 | 0.310102156  | 3.551981699 | 0.208820263 | 0.999970842 | NA |
| ASV_16s_31320 | 0.044875837 | 0.310102156  | 3.551981699 | 0.208820263 | 0.999970842 | NA |
| ASV_16s_31321 | 0.044875837 | 0.310102156  | 3.551981699 | 0.208820263 | 0.999970842 | NA |
| ASV_16s_31322 | 0.044875837 | 0.310102156  | 3.551981699 | 0.208820263 | 0.999970842 | NA |
| ASV_16s_31323 | 0.044875837 | 0.310102156  | 3.551981699 | 0.208820263 | 0.999970842 | NA |
| ASV_16s_31324 | 0.044875837 | 0.310102156  | 3.551981699 | 0.208820263 | 0.999970842 | NA |
| ASV_16s_31325 | 0.044875837 | 0.310102156  | 3.551981699 | 0.208820263 | 0.999970842 | NA |
| ASV_16s_31326 | 0.044875837 | 0.310102156  | 3.551981699 | 0.208820263 | 0.999970842 | NA |
| ASV_16s_31327 | 0.044875837 | 0.310102156  | 3.551981699 | 0.208820263 | 0.999970842 | NA |
| ASV_16s_31328 | 0.044875837 | 0.310102156  | 3.551981699 | 0.208820263 | 0.999970842 | NA |
| ASV_16s_31329 | 0.044875837 | 0.310102156  | 3.551981699 | 0.208820263 | 0.999970842 | NA |
| ASV_16s_31330 | 0.044875837 | 0.310102156  | 3.551981699 | 0.208820263 | 0.999970842 | NA |
| ASV_16s_31331 | 0.044875837 | 0.310102156  | 3.551981699 | 0.208820263 | 0.999970842 | NA |
| ASV_16s_31332 | 0.044875837 | 0.310102156  | 3.551981699 | 0.208820263 | 0.999970842 | NA |
| ASV_16s_31333 | 0.044875837 | 0.310102156  | 3.551981699 | 0.208820263 | 0.999970842 | NA |
| ASV_16s_31334 | 0.044875837 | 0.310102156  | 3.551981699 | 0.208820263 | 0.999970842 | NA |
| ASV_16s_31335 | 0.044875837 | 0.310102156  | 3.551981699 | 0.208820263 | 0.999970842 | NA |
| ASV_16s_31336 | 0.044875837 | 0.310102156  | 3.551981699 | 0.208820263 | 0.999970842 | NA |
| ASV_16s_31337 | 0.044875837 | 0.310102156  | 3.551981699 | 0.208820263 | 0.999970842 | NA |
| ASV_16s_31338 | 0.044875837 | 0.310102156  | 3.551981699 | 0.208820263 | 0.999970842 | NA |
| ASV_16s_31339 | 0.044875837 | 0.310102156  | 3.551981699 | 0.208820263 | 0.999970842 | NA |
| ASV_16s_31340 | 0.044875837 | 0.310102156  | 3.551981699 | 0.208820263 | 0.999970842 | NA |
| ASV_16s_31341 | 0.044875837 | 0.310102156  | 3.551981699 | 0.208820263 | 0.999970842 | NA |
| ASV_16s_31342 | 0.044875837 | 0.310102156  | 3.551981699 | 0.208820263 | 0.999970842 | NA |
| ASV_16s_31343 | 0.044875837 | 0.310102156  | 3.551981699 | 0.208820263 | 0.999970842 | NA |
| ASV_16s_31344 | 0.044875837 | 0.310102156  | 3.551981699 | 0.208820263 | 0.999970842 | NA |
| ASV_16s_31345 | 0.044875837 | 0.310102156  | 3.551981699 | 0.208820263 | 0.999970842 | NA |
| ASV_16s_31346 | 0.044875837 | 0.310102156  | 3.551981699 | 0.208820263 | 0.999970842 | NA |
| ASV_16s_31347 | 0.044875837 | 0.310102156  | 3.551981699 | 0.208820263 | 0.999970842 | NA |
| ASV_16s_31348 | 0.044875837 | 0.310102156  | 3.551981699 | 0.208820263 | 0.999970842 | NA |
| ASV_16s_31349 | 0.044875837 | 0.310102156  | 3.551981699 | 0.208820263 | 0.999970842 | NA |
| ASV_16s_31350 | 0.045393675 | 0.212933155  | 3.551951557 | 0.231493553 | 0.99995854  | NA |
| ASV_16s_31351 | 0.051304492 | 0.164384867  | 3.551937529 | 0.265738577 | 0.99993369  | NA |
| ASV_16s_31352 | 0.049527491 | 0.164384867  | 3.551937529 | 0.257546231 | 0.999940384 | NA |
| ASV_16s_31353 | 0.045911513 | 0.115860983  | 3.551924145 | 0.245349628 | 0.999949456 | NA |
| ASV_16s_31354 | 0.044898654 | 0.115860983  | 3.551924145 | 0.240724434 | 0.999952629 | NA |
| ASV_16s_31355 | 0.045911513 | 0.115860983  | 3.551924145 | 0.245349628 | 0.999949456 | NA |
| ASV_16s_31356 | 0.052628594 | 0.066767887  | 3.551907794 | 0.277180349 | 0.999923487 | NA |
| ASV_16s_31357 | 0.044904358 | 0.071011192  | 3.551910225 | 0.243404384 | 0.999950808 | NA |
| ASV_16s_31358 | 0.046170432 | 0.066767887  | 3.551907794 | 0.248526101 | 0.999947194 | NA |
| ASV_16s_31359 | 0.044904358 | 0.071011192  | 3.551910225 | 0.243404384 | 0.999950808 | NA |
| ASV_16s_31360 | 0.046170432 | 0.066767887  | 3.551907794 | 0.248526101 | 0.999947194 | NA |
| ASV_16s_31361 | 0.052628594 | 0.066767887  | 3.551907794 | 0.277180349 | 0.999923487 | NA |
| ASV_16s_31362 | 0.046170432 | 0.066767887  | 3.551907794 | 0.248526101 | 0.999947194 | NA |
| ASV_16s_31363 | 0.052628594 | 0.066767887  | 3.551907794 | 0.277180349 | 0.999923487 | NA |
| ASV_16s_31364 | 0.04642935  | 0.018919002  | 3.551889057 | 0.249423741 | 0.999946542 | NA |
| ASV_16s_31365 | 0.044915766 | -0.007476766 | 3.551883127 | 0.242777863 | 0.999951238 | NA |
| ASV_16s_31366 | 0.046688269 | -0.020974522 | 3.551872552 | 0.248688281 | 0.999947076 | NA |
| ASV_16s_31367 | 0.050563167 | -0.025064229 | 3.551869389 | 0.264446744 | 0.999934778 | NA |
| ASV_16s_31368 | 0.04618184  | -0.017167825 | 3.551875513 | 0.246965972 | 0.999948314 | NA |
| ASV_16s_31369 | 0.046440758 | -0.056125933 | 3.551860942 | 0.244082913 | 0.99995034  | NA |
| ASV_16s_31370 | 0.016042572 | 0.06992835   | 3.551951057 | 0.115309699 | 0.999996217 | NA |
| ASV_16s_31371 | 0.016042572 | 0.06992835   | 3.551951057 | 0.115309699 | 0.999996217 | NA |
| ASV_16s_31372 | 0.016042572 | 0.06992835   | 3.551951057 | 0.115309699 | 0.999996217 | NA |
| ASV_16s_31373 | 0.076128572 | -0.238748721 | 3.551758362 | 0.323989966 | 0.99987026  | NA |
| ASV_16s_31374 | 0.076128572 | -0.238748721 | 3.551758362 | 0.323989966 | 0.99987026  | NA |
| ASV_16s_31375 | 0.076128572 | -0.238748721 | 3.551758362 | 0.323989966 | 0.99987026  | NA |
| ASV_16s_31376 | 0.061224788 | -0.238748721 | 3.551758362 | 0.268157212 | 0.999931617 | NA |
| ASV_16s_31377 | 0.061224788 | -0.238748721 | 3.551758362 | 0.268157212 | 0.999931617 | NA |
| ASV_16s_31378 | 0.061224788 | -0.238748721 | 3.551758362 | 0.268157212 | 0.999931617 | NA |
| ASV_16s_31379 | 0.061224788 | -0.238748721 | 3.551758362 | 0.268157212 | 0.999931617 | NA |







|               |             |              |             |              |                |
|---------------|-------------|--------------|-------------|--------------|----------------|
| ASV_16s_31581 | 0.01431772  | -0.05238782  | 3.551557199 | 0.00556561   | 1 NA           |
| ASV_16s_31582 | 0.01431772  | -0.05238782  | 3.551557199 | 0.00556561   | 1 NA           |
| ASV_16s_31583 | 0.01431772  | -0.05238782  | 3.551557199 | 0.00556561   | 1 NA           |
| ASV_16s_31584 | 0.01431772  | -0.05238782  | 3.551557199 | 0.00556561   | 1 NA           |
| ASV_16s_31585 | 0.01431772  | -0.05238782  | 3.551557199 | 0.00556561   | 1 NA           |
| ASV_16s_31586 | 0.012699922 | -0.033623951 | 3.551595631 | -0.004215447 | 1 NA           |
| ASV_16s_31587 | 0.012699922 | -0.033623951 | 3.551595631 | -0.004215447 | 1 NA           |
| ASV_16s_31588 | 0.029088348 | 0.234422187  | 3.551402785 | 0.086405986  | 0.999998607 NA |
| ASV_16s_31589 | 0.0150968   | 0.263734636  | 3.551709072 | 5.80E-04     | 1 NA           |
| ASV_16s_31590 | 0.019959396 | 0.248539233  | 3.55160938  | 0.029094865  | 0.999999968 NA |
| ASV_16s_31591 | 0.019959396 | 0.248539233  | 3.55160938  | 0.029094865  | 0.999999968 NA |
| ASV_16s_31592 | 0.019959396 | 0.248539233  | 3.55160938  | 0.029094865  | 0.999999968 NA |
| ASV_16s_31595 | 0.070083346 | 0.595498088  | 3.550942766 | 0.215072113  | 0.999967748 NA |
| ASV_16s_31596 | 0.070083346 | 0.595498088  | 3.550942766 | 0.215072113  | 0.999967748 NA |
| ASV_16s_31597 | 0.070083346 | 0.595498088  | 3.550942766 | 0.215072113  | 0.999967748 NA |
| ASV_16s_31598 | 0.070083346 | 0.595498088  | 3.550942766 | 0.215072113  | 0.999967748 NA |
| ASV_16s_31599 | 0.070083346 | 0.595498088  | 3.550942766 | 0.215072113  | 0.999967748 NA |
| ASV_16s_31600 | 0.070083346 | 0.595498088  | 3.550942766 | 0.215072113  | 0.999967748 NA |
| ASV_16s_31601 | 0.070083346 | 0.595498088  | 3.550942766 | 0.215072113  | 0.999967748 NA |
| ASV_16s_31602 | 0.031798106 | 0.593245724  | 3.551319457 | 0.078492645  | 0.999999001 NA |
| ASV_16s_31603 | 0.0631402   | 0.685629144  | 3.551599303 | 0.32914441   | 0.999863164 NA |
| ASV_16s_31604 | 0.0631402   | 0.685629144  | 3.551599303 | 0.32914441   | 0.999863164 NA |
| ASV_16s_31605 | 0.0631402   | 0.685629144  | 3.551599303 | 0.32914441   | 0.999863164 NA |
| ASV_16s_31606 | 0.049569543 | 0.669686902  | 3.551774393 | 0.277090972  | 0.99992357 NA  |
| ASV_16s_31607 | 0.047410537 | 0.403006472  | 3.551992112 | 0.16862528   | 0.999985986 NA |
| ASV_16s_31608 | 0.061062435 | 0.027368041  | 3.551931337 | 0.192026611  | 0.999978115 NA |
| ASV_16s_31609 | 0.060409197 | -0.068872965 | 3.551908405 | 0.212184193  | 0.999969204 NA |
| ASV_16s_31610 | 0.048903893 | 0.066598257  | 3.551909181 | 0.189528739  | 0.999979075 NA |
| ASV_16s_31611 | 0.046438687 | 0.066598257  | 3.551909181 | 0.168295417  | 0.99998608 NA  |
| ASV_16s_31612 | 0.04823376  | 0.069581793  | 3.551892776 | 0.143712967  | 0.999991914 NA |
| ASV_16s_31613 | 0.04891428  | 0.495934497  | 3.55200159  | 0.158880909  | 0.999988579 NA |
| ASV_16s_31614 | 0.049447345 | 0.168199485  | 3.551905393 | 0.132728577  | 0.999993852 NA |
| ASV_16s_31615 | 0.053177821 | 0.080284577  | 3.551962929 | 0.172901459  | 0.999984728 NA |
| ASV_16s_31616 | 0.055663684 | -0.217050292 | 3.551841704 | 0.177822172  | 0.999983184 NA |
| ASV_16s_31617 | 0.060073932 | 0.032985608  | 3.551955226 | 0.217926503  | 0.999966263 NA |
| ASV_16s_31618 | 0.059338063 | 0.036514882  | 3.551932232 | 0.147198256  | 0.999991218 NA |
| ASV_16s_31619 | 0.051665066 | 0.032985608  | 3.551955226 | 0.196166739  | 0.999976456 NA |
| ASV_16s_31620 | 0.060787978 | 0.25543521   | 3.551936216 | 0.238276348  | 0.99995425 NA  |
| ASV_16s_31621 | 0.049690524 | 0.255352043  | 3.551936344 | 0.199007211  | 0.999975269 NA |
| ASV_16s_31622 | 0.047126232 | 0.258699396  | 3.551956323 | 0.157680621  | 0.999988873 NA |
| ASV_16s_31623 | 0.058590037 | 0.077586808  | 3.551942394 | 0.22623158   | 0.999961668 NA |
| ASV_16s_31624 | 0.056220587 | 0.073728925  | 3.55192105  | 0.237352911  | 0.999954852 NA |
| ASV_16s_31625 | 0.057678194 | 0.077586808  | 3.551942394 | 0.221379413  | 0.999964402 NA |
| ASV_16s_31626 | 0.055031365 | 0.172055384  | 3.551968088 | 0.166494166  | 0.999986585 NA |
| ASV_16s_31627 | 0.056271809 | 0.077586808  | 3.551942394 | 0.220978709  | 0.999964621 NA |
| ASV_16s_31628 | 0.052072489 | 0.081756165  | 3.551967583 | 0.173137877  | 0.999984656 NA |
| ASV_16s_31629 | 0.054489324 | 0.077586808  | 3.551942394 | 0.214158909  | 0.999968214 NA |
| ASV_16s_31630 | 0.060232693 | 0.352236379  | 3.5519136   | 0.218135977  | 0.999966152 NA |
| ASV_16s_31631 | 0.048817767 | 0.073728925  | 3.55192105  | 0.220362518  | 0.999964957 NA |
| ASV_16s_31632 | 0.050962022 | 0.353853046  | 3.551961242 | 0.163892154  | 0.999987292 NA |
| ASV_16s_31633 | 0.055781831 | -5.63E-06    | 3.55188683  | 0.226706767  | 0.999961392 NA |
| ASV_16s_31634 | 0.058756695 | 0.119782395  | 3.551898118 | 0.243527277  | 0.999950724 NA |
| ASV_16s_31635 | 0.056296329 | 0.119782395  | 3.551898118 | 0.237290413  | 0.999954892 NA |
| ASV_16s_31636 | 0.064412779 | 0.42154145   | 3.551823516 | 0.268097758  | 0.999931669 NA |
| ASV_16s_31637 | 0.037759905 | 0.008015825  | 3.551816925 | 0.133025006  | 0.999993804 NA |
| ASV_16s_31638 | 0.055329134 | 0.034418487  | 3.551598845 | 0.123011158  | 0.999995271 NA |
| ASV_16s_31639 | 0.058952034 | 0.775599582  | 3.551896373 | 0.229345587  | 0.999959837 NA |
| ASV_16s_31640 | 0.058952034 | 0.775599582  | 3.551896373 | 0.229345587  | 0.999959837 NA |
| ASV_16s_31641 | 0.058952034 | 0.775599582  | 3.551896373 | 0.229345587  | 0.999959837 NA |
| ASV_16s_31642 | 0.058952034 | 0.775599582  | 3.551896373 | 0.229345587  | 0.999959837 NA |
| ASV_16s_31643 | 0.058952034 | 0.775599582  | 3.551896373 | 0.229345587  | 0.999959837 NA |
| ASV_16s_31644 | 0.058952034 | 0.775599582  | 3.551896373 | 0.229345587  | 0.999959837 NA |
| ASV_16s_31645 | 0.076082648 | 0.306256969  | 3.55196502  | 0.312331604  | 0.999885363 NA |
| ASV_16s_31646 | 0.076082648 | 0.306256969  | 3.55196502  | 0.312331604  | 0.999885363 NA |
| ASV_16s_31647 | 0.076082648 | 0.306256969  | 3.55196502  | 0.312331604  | 0.999885363 NA |
| ASV_16s_31648 | 0.076082648 | 0.306256969  | 3.55196502  | 0.312331604  | 0.999885363 NA |
| ASV_16s_31649 | 0.066738677 | 0.318098936  | 3.552010265 | 0.175743477  | 0.999983849 NA |

|               |             |             |             |             |                |
|---------------|-------------|-------------|-------------|-------------|----------------|
| ASV_16s_31650 | 0.06246289  | 0.82394879  | 3.551867591 | 0.239454436 | 0.999953475 NA |
| ASV_16s_31651 | 0.06246289  | 0.82394879  | 3.551867591 | 0.239454436 | 0.999953475 NA |
| ASV_16s_31652 | 0.06246289  | 0.82394879  | 3.551867591 | 0.239454436 | 0.999953475 NA |
| ASV_16s_31653 | 0.06246289  | 0.82394879  | 3.551867591 | 0.239454436 | 0.999953475 NA |
| ASV_16s_31654 | 0.06246289  | 0.82394879  | 3.551867591 | 0.239454436 | 0.999953475 NA |
| ASV_16s_31655 | 0.06246289  | 0.82394879  | 3.551867591 | 0.239454436 | 0.999953475 NA |
| ASV_16s_31656 | 0.049751412 | 0.760156162 | 3.551932799 | 0.208556857 | 0.999970967 NA |
| ASV_16s_31657 | 0.049751412 | 0.760156162 | 3.551932799 | 0.208556857 | 0.999970967 NA |
| ASV_16s_31658 | 0.049751412 | 0.760156162 | 3.551932799 | 0.208556857 | 0.999970967 NA |
| ASV_16s_31659 | 0.049751412 | 0.760156162 | 3.551932799 | 0.208556857 | 0.999970967 NA |
| ASV_16s_31660 | 0.053131951 | 0.777971322 | 3.551916333 | 0.215951944 | 0.999967295 NA |
| ASV_16s_31661 | 0.053131951 | 0.777971322 | 3.551916333 | 0.215951944 | 0.999967295 NA |
| ASV_16s_31662 | 0.055981555 | 0.792422902 | 3.551902556 | 0.22267808  | 0.999963684 NA |
| ASV_16s_31663 | 0.055981555 | 0.792422902 | 3.551902556 | 0.22267808  | 0.999963684 NA |
| ASV_16s_31664 | 0.055981555 | 0.792422902 | 3.551902556 | 0.22267808  | 0.999963684 NA |
| ASV_16s_31665 | 0.055981555 | 0.792422902 | 3.551902556 | 0.22267808  | 0.999963684 NA |
| ASV_16s_31666 | 0.055981555 | 0.792422902 | 3.551902556 | 0.22267808  | 0.999963684 NA |
| ASV_16s_31667 | 0.055981555 | 0.792422902 | 3.551902556 | 0.22267808  | 0.999963684 NA |
| ASV_16s_31668 | 0.051363005 | 0.768759207 | 3.551924787 | 0.211999793 | 0.999969296 NA |
| ASV_16s_31669 | 0.051363005 | 0.768759207 | 3.551924787 | 0.211999793 | 0.999969296 NA |
| ASV_16s_31670 | 0.051363005 | 0.768759207 | 3.551924787 | 0.211999793 | 0.999969296 NA |
| ASV_16s_31671 | 0.051363005 | 0.768759207 | 3.551924787 | 0.211999793 | 0.999969296 NA |
| ASV_16s_31672 | 0.051363005 | 0.768759207 | 3.551924787 | 0.211999793 | 0.999969296 NA |
| ASV_16s_31673 | 0.051363005 | 0.768759207 | 3.551924787 | 0.211999793 | 0.999969296 NA |
| ASV_16s_31674 | 0.051363005 | 0.768759207 | 3.551924787 | 0.211999793 | 0.999969296 NA |
| ASV_16s_31675 | 0.051363005 | 0.768759207 | 3.551924787 | 0.211999793 | 0.999969296 NA |
| ASV_16s_31676 | 0.051363005 | 0.768759207 | 3.551924787 | 0.211999793 | 0.999969296 NA |
| ASV_16s_31677 | 0.051363005 | 0.768759207 | 3.551924787 | 0.211999793 | 0.999969296 NA |
| ASV_16s_31678 | 0.051363005 | 0.768759207 | 3.551924787 | 0.211999793 | 0.999969296 NA |
| ASV_16s_31679 | 0.051363005 | 0.768759207 | 3.551924787 | 0.211999793 | 0.999969296 NA |
| ASV_16s_31680 | 0.051363005 | 0.768759207 | 3.551924787 | 0.211999793 | 0.999969296 NA |
| ASV_16s_31681 | 0.051363005 | 0.768759207 | 3.551924787 | 0.211999793 | 0.999969296 NA |
| ASV_16s_31682 | 0.051363005 | 0.768759207 | 3.551924787 | 0.211999793 | 0.999969296 NA |
| ASV_16s_31683 | 0.051363005 | 0.768759207 | 3.551924787 | 0.211999793 | 0.999969296 NA |
| ASV_16s_31684 | 0.051363005 | 0.768759207 | 3.551924787 | 0.211999793 | 0.999969296 NA |
| ASV_16s_31685 | 0.081161094 | 0.863121479 | 3.551812457 | 0.297340609 | 0.999902932 NA |
| ASV_16s_31686 | 0.081161094 | 0.863121479 | 3.551812457 | 0.297340609 | 0.999902932 NA |
| ASV_16s_31687 | 0.048695658 | 0.324762464 | 3.552040287 | 0.219535741 | 0.999965404 NA |
| ASV_16s_31688 | 0.048695658 | 0.324762464 | 3.552040287 | 0.219535741 | 0.999965404 NA |
| ASV_16s_31689 | 0.048695658 | 0.324762464 | 3.552040287 | 0.219535741 | 0.999965404 NA |
| ASV_16s_31690 | 0.048695658 | 0.324762464 | 3.552040287 | 0.219535741 | 0.999965404 NA |
| ASV_16s_31691 | 0.048695658 | 0.324762464 | 3.552040287 | 0.219535741 | 0.999965404 NA |
| ASV_16s_31692 | 0.048695658 | 0.324762464 | 3.552040287 | 0.219535741 | 0.999965404 NA |
| ASV_16s_31693 | 0.048695658 | 0.324762464 | 3.552040287 | 0.219535741 | 0.999965404 NA |
| ASV_16s_31694 | 0.048695658 | 0.324762464 | 3.552040287 | 0.219535741 | 0.999965404 NA |
| ASV_16s_31695 | 0.048695658 | 0.324762464 | 3.552040287 | 0.219535741 | 0.999965404 NA |
| ASV_16s_31696 | 0.048695658 | 0.324762464 | 3.552040287 | 0.219535741 | 0.999965404 NA |
| ASV_16s_31697 | 0.048695658 | 0.324762464 | 3.552040287 | 0.219535741 | 0.999965404 NA |
| ASV_16s_31698 | 0.058952034 | 0.3252462   | 3.552042133 | 0.250432814 | 0.999945802 NA |
| ASV_16s_31699 | 0.073384492 | 0.325218343 | 3.552041905 | 0.302108046 | 0.999897564 NA |
| ASV_16s_31700 | 0.065203477 | 0.32516959  | 3.552041511 | 0.272697204 | 0.999927606 NA |
| ASV_16s_31701 | 0.065203477 | 0.32516959  | 3.552041511 | 0.272697204 | 0.999927606 NA |
| ASV_16s_31702 | 0.056696796 | 0.329375491 | 3.552021611 | 0.131419619 | 0.999994059 NA |
| ASV_16s_31703 | 0.085411542 | 0.32516959  | 3.552041511 | 0.345770275 | 0.999838447 NA |
| ASV_16s_31704 | 0.085411542 | 0.32516959  | 3.552041511 | 0.345770275 | 0.999838447 NA |
| ASV_16s_31705 | 0.085411542 | 0.32516959  | 3.552041511 | 0.345770275 | 0.999838447 NA |
| ASV_16s_31706 | 0.037736227 | 0.323787745 | 3.552035725 | 0.194274873 | 0.999977225 NA |
| ASV_16s_31707 | 0.037736227 | 0.323787745 | 3.552035725 | 0.194274873 | 0.999977225 NA |
| ASV_16s_31708 | 0.037736227 | 0.323787745 | 3.552035725 | 0.194274873 | 0.999977225 NA |
| ASV_16s_31709 | 0.048954862 | 0.324227738 | 3.552037776 | 0.223122296 | 0.999963436 NA |
| ASV_16s_31710 | 0.051095693 | 0.324956931 | 3.552041205 | 0.226246632 | 0.999961659 NA |
| ASV_16s_31711 | 0.051095693 | 0.324956931 | 3.552041205 | 0.226246632 | 0.999961659 NA |
| ASV_16s_31712 | 0.051095693 | 0.324956931 | 3.552041205 | 0.226246632 | 0.999961659 NA |
| ASV_16s_31713 | 0.051095693 | 0.324956931 | 3.552041205 | 0.226246632 | 0.999961659 NA |
| ASV_16s_31714 | 0.051095693 | 0.324956931 | 3.552041205 | 0.226246632 | 0.999961659 NA |
| ASV_16s_31715 | 0.068587475 | 0.32516959  | 3.552041511 | 0.284985943 | 0.99991593 NA  |
| ASV_16s_31716 | 0.088596936 | 0.32516959  | 3.552041511 | 0.357220959 | 0.999819732 NA |

|               |             |              |             |             |                |
|---------------|-------------|--------------|-------------|-------------|----------------|
| ASV_16s_31717 | 0.088596936 | 0.32516959   | 3.552041511 | 0.357220959 | 0.999819732 NA |
| ASV_16s_31718 | 0.088596936 | 0.32516959   | 3.552041511 | 0.357220959 | 0.999819732 NA |
| ASV_16s_31719 | 0.088596936 | 0.32516959   | 3.552041511 | 0.357220959 | 0.999819732 NA |
| ASV_16s_31720 | 0.08703004  | 0.32516959   | 3.552041511 | 0.35159066  | 0.999829111 NA |
| ASV_16s_31721 | 0.08703004  | 0.32516959   | 3.552041511 | 0.35159066  | 0.999829111 NA |
| ASV_16s_31722 | 0.08703004  | 0.32516959   | 3.552041511 | 0.35159066  | 0.999829111 NA |
| ASV_16s_31723 | 0.08703004  | 0.32516959   | 3.552041511 | 0.35159066  | 0.999829111 NA |
| ASV_16s_31724 | 0.060743135 | 0.32516959   | 3.552041511 | 0.256467587 | 0.999941229 NA |
| ASV_16s_31725 | 0.063819105 | 0.413324081  | 3.55196018  | 0.315858121 | 0.999880931 NA |
| ASV_16s_31726 | 0.072026325 | 0.32516959   | 3.552041511 | 0.297452331 | 0.999902809 NA |
| ASV_16s_31727 | 0.072026325 | 0.32516959   | 3.552041511 | 0.297452331 | 0.999902809 NA |
| ASV_16s_31728 | 0.065685359 | -0.208297594 | 3.551872308 | 0.279684919 | 0.999921116 NA |
| ASV_16s_31729 | 0.0631402   | -0.208297594 | 3.551872308 | 0.270911386 | 0.999929203 NA |
| ASV_16s_31730 | 0.0631402   | -0.208297594 | 3.551872308 | 0.270911386 | 0.999929203 NA |
| ASV_16s_31731 | 0.0631402   | -0.208297594 | 3.551872308 | 0.270911386 | 0.999929203 NA |
| ASV_16s_31732 | 0.0631402   | -0.208297594 | 3.551872308 | 0.270911386 | 0.999929203 NA |
| ASV_16s_31733 | 0.0631402   | -0.208297594 | 3.551872308 | 0.270911386 | 0.999929203 NA |
| ASV_16s_31734 | 0.0631402   | -0.208297594 | 3.551872308 | 0.270911386 | 0.999929203 NA |
| ASV_16s_31735 | 0.0631402   | -0.208297594 | 3.551872308 | 0.270911386 | 0.999929203 NA |
| ASV_16s_31736 | 0.0631402   | -0.208297594 | 3.551872308 | 0.270911386 | 0.999929203 NA |
| ASV_16s_31737 | 0.0631402   | -0.208297594 | 3.551872308 | 0.270911386 | 0.999929203 NA |
| ASV_16s_31738 | 0.054252356 | -0.202917663 | 3.55187675  | 0.240539879 | 0.999952752 NA |
| ASV_16s_31739 | 0.054252356 | -0.202917663 | 3.55187675  | 0.240539879 | 0.999952752 NA |
| ASV_16s_31740 | 0.037687593 | -0.106596768 | 3.551927596 | 0.198823641 | 0.999975347 NA |
| ASV_16s_31741 | 0.037687593 | -0.106596768 | 3.551927596 | 0.198823641 | 0.999975347 NA |
| ASV_16s_31742 | 0.051452732 | 0.304167722  | 3.551953325 | 0.258194933 | 0.999939872 NA |
| ASV_16s_31743 | 0.055441927 | -0.208297593 | 3.551872308 | 0.244302232 | 0.999950187 NA |
| ASV_16s_31744 | 0.055441927 | -0.208297593 | 3.551872308 | 0.244302232 | 0.999950187 NA |
| ASV_16s_31745 | 0.055441927 | -0.208297593 | 3.551872308 | 0.244302232 | 0.999950187 NA |
| ASV_16s_31746 | 0.055441927 | -0.208297593 | 3.551872308 | 0.244302232 | 0.999950187 NA |
| ASV_16s_31747 | 0.049330666 | -0.176561224 | 3.551893549 | 0.226077375 | 0.999961757 NA |
| ASV_16s_31748 | 0.049330666 | -0.176561224 | 3.551893549 | 0.226077375 | 0.999961757 NA |
| ASV_16s_31749 | 0.067970898 | 0.848421481  | 3.551834233 | 0.255053123 | 0.999942324 NA |
| ASV_16s_31750 | 0.067970898 | 0.848421481  | 3.551834233 | 0.255053123 | 0.999942324 NA |
| ASV_16s_31751 | 0.067970898 | 0.848421481  | 3.551834233 | 0.255053123 | 0.999942324 NA |
| ASV_16s_31752 | 0.068310799 | 0.845920757  | 3.551920327 | 0.142315256 | 0.999992181 NA |
| ASV_16s_31753 | 0.103774573 | 0.863121479  | 3.551812457 | 0.370949792 | 0.999795384 NA |
| ASV_16s_31754 | 0.103774573 | 0.863121479  | 3.551812457 | 0.370949792 | 0.999795384 NA |
| ASV_16s_31755 | 0.074357749 | 0.863121479  | 3.551812457 | 0.275052517 | 0.999925461 NA |
| ASV_16s_31756 | 0.074357749 | 0.863121479  | 3.551812457 | 0.275052517 | 0.999925461 NA |
| ASV_16s_31757 | 0.05587663  | 0.846667734  | 3.551718358 | 0.170995133 | 0.999985298 NA |
| ASV_16s_31758 | 0.05587663  | 0.846667734  | 3.551718358 | 0.170995133 | 0.999985298 NA |
| ASV_16s_31759 | 0.05587663  | 0.846667734  | 3.551718358 | 0.170995133 | 0.999985298 NA |
| ASV_16s_31760 | 0.05587663  | 0.846667734  | 3.551718358 | 0.170995133 | 0.999985298 NA |
| ASV_16s_31761 | 0.05587663  | 0.846667734  | 3.551718358 | 0.170995133 | 0.999985298 NA |
| ASV_16s_31762 | 0.05587663  | 0.846667734  | 3.551718358 | 0.170995133 | 0.999985298 NA |
| ASV_16s_31763 | 0.05587663  | 0.846667734  | 3.551718358 | 0.170995133 | 0.999985298 NA |
| ASV_16s_31764 | 0.05587663  | 0.846667734  | 3.551718358 | 0.170995133 | 0.999985298 NA |
| ASV_16s_31765 | 0.05587663  | 0.846667734  | 3.551718358 | 0.170995133 | 0.999985298 NA |
| ASV_16s_31766 | 0.05587663  | 0.846667734  | 3.551718358 | 0.170995133 | 0.999985298 NA |
| ASV_16s_31767 | 0.029162218 | 0.687978808  | 3.551877969 | 0.117483059 | 0.999995965 NA |
| ASV_16s_31768 | 0.029162218 | 0.687978808  | 3.551877969 | 0.117483059 | 0.999995965 NA |
| ASV_16s_31769 | 0.029162218 | 0.687978808  | 3.551877969 | 0.117483059 | 0.999995965 NA |
| ASV_16s_31770 | 0.029162218 | 0.687978808  | 3.551877969 | 0.117483059 | 0.999995965 NA |
| ASV_16s_31771 | 0.080153988 | 0.881846653  | 3.551648287 | 0.237438187 | 0.999954796 NA |
| ASV_16s_31772 | 0.049994315 | 0.817276397  | 3.551769902 | 0.159113465 | 0.999988521 NA |
| ASV_16s_31773 | 0.049994315 | 0.817276397  | 3.551769902 | 0.159113465 | 0.999988521 NA |
| ASV_16s_31774 | 0.049994315 | 0.817276397  | 3.551769902 | 0.159113465 | 0.999988521 NA |
| ASV_16s_31775 | 0.049994315 | 0.817276397  | 3.551769902 | 0.159113465 | 0.999988521 NA |
| ASV_16s_31776 | 0.049994315 | 0.817276397  | 3.551769902 | 0.159113465 | 0.999988521 NA |
| ASV_16s_31777 | 0.049994315 | 0.817276397  | 3.551769902 | 0.159113465 | 0.999988521 NA |
| ASV_16s_31778 | 0.049994315 | 0.817276397  | 3.551769902 | 0.159113465 | 0.999988521 NA |
| ASV_16s_31779 | 0.049994315 | 0.817276397  | 3.551769902 | 0.159113465 | 0.999988521 NA |
| ASV_16s_31780 | 0.049994315 | 0.817276397  | 3.551769902 | 0.159113465 | 0.999988521 NA |
| ASV_16s_31781 | 0.068905625 | 0.881846653  | 3.551648287 | 0.204962767 | 0.999972643 NA |
| ASV_16s_31782 | 0.068905625 | 0.881846653  | 3.551648287 | 0.204962767 | 0.999972643 NA |
| ASV_16s_31783 | 0.068905625 | 0.881846653  | 3.551648287 | 0.204962767 | 0.999972643 NA |

|               |             |              |             |             |             |    |
|---------------|-------------|--------------|-------------|-------------|-------------|----|
| ASV_16s_31784 | 0.068905625 | 0.881846653  | 3.551648287 | 0.204962767 | 0.999972643 | NA |
| ASV_16s_31785 | 0.068905625 | 0.881846653  | 3.551648287 | 0.204962767 | 0.999972643 | NA |
| ASV_16s_31786 | 0.068905625 | 0.881846653  | 3.551648287 | 0.204962767 | 0.999972643 | NA |
| ASV_16s_31787 | 0.068905625 | 0.881846653  | 3.551648287 | 0.204962767 | 0.999972643 | NA |
| ASV_16s_31788 | 0.068905625 | 0.881846653  | 3.551648287 | 0.204962767 | 0.999972643 | NA |
| ASV_16s_31789 | 0.068905625 | 0.881846653  | 3.551648287 | 0.204962767 | 0.999972643 | NA |
| ASV_16s_31790 | 0.058643923 | 0.341540105  | 3.5518614   | 0.1964446   | 0.999976342 | NA |
| ASV_16s_31791 | 0.077729677 | 0.341540105  | 3.5518614   | 0.254222798 | 0.99994296  | NA |
| ASV_16s_31792 | 0.077729677 | 0.341540105  | 3.5518614   | 0.254222798 | 0.99994296  | NA |
| ASV_16s_31793 | 0.063194116 | 0.341540105  | 3.5518614   | 0.210272851 | 0.999970142 | NA |
| ASV_16s_31794 | 0.063194116 | 0.341540105  | 3.5518614   | 0.210272851 | 0.999970142 | NA |
| ASV_16s_31795 | 0.063194116 | 0.341540105  | 3.5518614   | 0.210272851 | 0.999970142 | NA |
| ASV_16s_31796 | 0.063194116 | 0.341540105  | 3.5518614   | 0.210272851 | 0.999970142 | NA |
| ASV_16s_31797 | 0.063194116 | 0.341540105  | 3.5518614   | 0.210272851 | 0.999970142 | NA |
| ASV_16s_31798 | 0.063194116 | 0.341540105  | 3.5518614   | 0.210272851 | 0.999970142 | NA |
| ASV_16s_31799 | 0.063194116 | 0.341540105  | 3.5518614   | 0.210272851 | 0.999970142 | NA |
| ASV_16s_31800 | 0.063194116 | 0.341540105  | 3.5518614   | 0.210272851 | 0.999970142 | NA |
| ASV_16s_31801 | 0.061599272 | 0.336781405  | 3.551979969 | 0.139920818 | 0.999992625 | NA |
| ASV_16s_31802 | 0.057326839 | 0.341540105  | 3.5518614   | 0.192435639 | 0.999977955 | NA |
| ASV_16s_31803 | 0.057326839 | 0.341540105  | 3.5518614   | 0.192435639 | 0.999977955 | NA |
| ASV_16s_31804 | 0.057326839 | 0.341540105  | 3.5518614   | 0.192435639 | 0.999977955 | NA |
| ASV_16s_31805 | 0.05205042  | 0.341540105  | 3.5518614   | 0.17634681  | 0.999983658 | NA |
| ASV_16s_31806 | 0.042967008 | 0.340338486  | 3.551901687 | 0.155782679 | 0.999989327 | NA |
| ASV_16s_31807 | 0.042967008 | 0.340338486  | 3.551901687 | 0.155782679 | 0.999989327 | NA |
| ASV_16s_31808 | 0.042967008 | 0.340338486  | 3.551901687 | 0.155782679 | 0.999989327 | NA |
| ASV_16s_31809 | 0.042967008 | 0.340338486  | 3.551901687 | 0.155782679 | 0.999989327 | NA |
| ASV_16s_31810 | 0.042967008 | 0.340338486  | 3.551901687 | 0.155782679 | 0.999989327 | NA |
| ASV_16s_31811 | 0.042967008 | 0.340338486  | 3.551901687 | 0.155782679 | 0.999989327 | NA |
| ASV_16s_31812 | 0.042967008 | 0.340338486  | 3.551901687 | 0.155782679 | 0.999989327 | NA |
| ASV_16s_31813 | 0.042967008 | 0.340338486  | 3.551901687 | 0.155782679 | 0.999989327 | NA |
| ASV_16s_31814 | 0.073604449 | 0.341540105  | 3.5518614   | 0.241784275 | 0.999951915 | NA |
| ASV_16s_31815 | 0.073604449 | 0.341540105  | 3.5518614   | 0.241784275 | 0.999951915 | NA |
| ASV_16s_31816 | 0.073604449 | 0.341540105  | 3.5518614   | 0.241784275 | 0.999951915 | NA |
| ASV_16s_31817 | 0.073604449 | 0.341540105  | 3.5518614   | 0.241784275 | 0.999951915 | NA |
| ASV_16s_31818 | 0.073604449 | 0.341540105  | 3.5518614   | 0.241784275 | 0.999951915 | NA |
| ASV_16s_31819 | 0.073604449 | 0.341540105  | 3.5518614   | 0.241784275 | 0.999951915 | NA |
| ASV_16s_31820 | 0.073604449 | 0.341540105  | 3.5518614   | 0.241784275 | 0.999951915 | NA |
| ASV_16s_31821 | 0.073604449 | 0.341540105  | 3.5518614   | 0.241784275 | 0.999951915 | NA |
| ASV_16s_31822 | 0.073604449 | 0.341540105  | 3.5518614   | 0.241784275 | 0.999951915 | NA |
| ASV_16s_31823 | 0.073604449 | 0.341540105  | 3.5518614   | 0.241784275 | 0.999951915 | NA |
| ASV_16s_31824 | 0.046488779 | 0.341129588  | 3.55188681  | 0.163021944 | 0.999987523 | NA |
| ASV_16s_31825 | 0.046488779 | 0.341129588  | 3.55188681  | 0.163021944 | 0.999987523 | NA |
| ASV_16s_31826 | 0.046488779 | 0.341129588  | 3.55188681  | 0.163021944 | 0.999987523 | NA |
| ASV_16s_31827 | 0.089737152 | 0.341540105  | 3.5518614   | 0.290273259 | 0.999910526 | NA |
| ASV_16s_31828 | 0.016186997 | 0.32887675   | 3.551987587 | 0.076289693 | 0.99999095  | NA |
| ASV_16s_31829 | 0.065217381 | 0.341540105  | 3.5518614   | 0.216410858 | 0.999967057 | NA |
| ASV_16s_31830 | 0.065217381 | 0.341540105  | 3.5518614   | 0.216410858 | 0.999967057 | NA |
| ASV_16s_31831 | 0.065217381 | 0.341540105  | 3.5518614   | 0.216410858 | 0.999967057 | NA |
| ASV_16s_31832 | 0.065217381 | 0.341540105  | 3.5518614   | 0.216410858 | 0.999967057 | NA |
| ASV_16s_31833 | 0.065217381 | 0.341540105  | 3.5518614   | 0.216410858 | 0.999967057 | NA |
| ASV_16s_31834 | 0.058952034 | -0.206737812 | 3.55162525  | 0.196938971 | 0.999976137 | NA |
| ASV_16s_31835 | 0.058952034 | -0.206737812 | 3.55162525  | 0.196938971 | 0.999976137 | NA |
| ASV_16s_31836 | 0.026119335 | -0.055336937 | 3.551804272 | 0.121902097 | 0.999995416 | NA |
| ASV_16s_31837 | 0.06407295  | -0.206737812 | 3.55162525  | 0.212052338 | 0.99996927  | NA |
| ASV_16s_31838 | 0.06407295  | -0.206737812 | 3.55162525  | 0.212052338 | 0.99996927  | NA |
| ASV_16s_31839 | 0.06407295  | -0.206737812 | 3.55162525  | 0.212052338 | 0.99996927  | NA |
| ASV_16s_31840 | 0.06407295  | -0.206737812 | 3.55162525  | 0.212052338 | 0.99996927  | NA |
| ASV_16s_31841 | 0.06407295  | -0.206737812 | 3.55162525  | 0.212052338 | 0.99996927  | NA |
| ASV_16s_31842 | 0.06407295  | -0.206737812 | 3.55162525  | 0.212052338 | 0.99996927  | NA |
| ASV_16s_31843 | 0.06407295  | -0.206737812 | 3.55162525  | 0.212052338 | 0.99996927  | NA |
| ASV_16s_31844 | 0.06407295  | -0.206737812 | 3.55162525  | 0.212052338 | 0.99996927  | NA |
| ASV_16s_31845 | 0.06407295  | -0.206737812 | 3.55162525  | 0.212052338 | 0.99996927  | NA |
| ASV_16s_31846 | 0.06407295  | -0.206737812 | 3.55162525  | 0.212052338 | 0.99996927  | NA |
| ASV_16s_31847 | 0.06407295  | -0.206737812 | 3.55162525  | 0.212052338 | 0.99996927  | NA |
| ASV_16s_31848 | 0.08265017  | -0.206737812 | 3.55162525  | 0.26652267  | 0.999933023 | NA |
| ASV_16s_31849 | 0.08265017  | -0.206737812 | 3.55162525  | 0.26652267  | 0.999933023 | NA |
| ASV_16s_31850 | 0.08265017  | -0.206737812 | 3.55162525  | 0.26652267  | 0.999933023 | NA |



|               |             |              |             |             |             |    |
|---------------|-------------|--------------|-------------|-------------|-------------|----|
| ASV_16s_31851 | 0.089510743 | -0.206737812 | 3.55162525  | 0.286498407 | 0.999914408 | NA |
| ASV_16s_31852 | 0.0719618   | 0.379282655  | 3.55167919  | 0.270004992 | 0.999930004 | NA |
| ASV_16s_31853 | 0.085307782 | -0.206737812 | 3.55162525  | 0.274269682 | 0.999926179 | NA |
| ASV_16s_31854 | 0.085307782 | -0.206737812 | 3.55162525  | 0.274269682 | 0.999926179 | NA |
| ASV_16s_31855 | 0.085307782 | -0.206737812 | 3.55162525  | 0.274269682 | 0.999926179 | NA |
| ASV_16s_31856 | 0.085307782 | -0.206737812 | 3.55162525  | 0.274269682 | 0.999926179 | NA |
| ASV_16s_31857 | 0.085307782 | -0.206737812 | 3.55162525  | 0.274269682 | 0.999926179 | NA |
| ASV_16s_31858 | 0.050111556 | -0.206737812 | 3.55162525  | 0.17074715  | 0.999985371 | NA |
| ASV_16s_31859 | 0.050111556 | -0.206737812 | 3.55162525  | 0.17074715  | 0.999985371 | NA |
| ASV_16s_31860 | 0.078917049 | -0.206737812 | 3.55162525  | 0.255621414 | 0.999941886 | NA |
| ASV_16s_31861 | 0.078917049 | -0.206737812 | 3.55162525  | 0.255621414 | 0.999941886 | NA |
| ASV_16s_31862 | 0.078917049 | -0.206737812 | 3.55162525  | 0.255621414 | 0.999941886 | NA |
| ASV_16s_31863 | 0.078917049 | -0.206737812 | 3.55162525  | 0.255621414 | 0.999941886 | NA |
| ASV_16s_31864 | 0.031721333 | -0.099812416 | 3.551753209 | 0.138890429 | 0.999992811 | NA |
| ASV_16s_31865 | 0.031721333 | -0.099812416 | 3.551753209 | 0.138890429 | 0.999992811 | NA |
| ASV_16s_31866 | 0.031721333 | -0.099812416 | 3.551753209 | 0.138890429 | 0.999992811 | NA |
| ASV_16s_31867 | 0.029071919 | -0.079776193 | 3.551778382 | 0.13517785  | 0.999993452 | NA |
| ASV_16s_31868 | 0.029071919 | -0.079776193 | 3.551778382 | 0.13517785  | 0.999993452 | NA |
| ASV_16s_31869 | 0.05205042  | -0.206737812 | 3.55162525  | 0.176502431 | 0.999983608 | NA |
| ASV_16s_31870 | 0.065366663 | 0.881846653  | 3.551648287 | 0.194710857 | 0.999977049 | NA |
| ASV_16s_31871 | 0.057337681 | 0.853731908  | 3.551703908 | 0.174252875 | 0.999984314 | NA |
| ASV_16s_31872 | 0.057337681 | 0.853731908  | 3.551703908 | 0.174252875 | 0.999984314 | NA |
| ASV_16s_31873 | 0.057337681 | 0.853731908  | 3.551703908 | 0.174252875 | 0.999984314 | NA |
| ASV_16s_31874 | 0.057337681 | 0.853731908  | 3.551703908 | 0.174252875 | 0.999984314 | NA |
| ASV_16s_31875 | 0.057337681 | 0.853731908  | 3.551703908 | 0.174252875 | 0.999984314 | NA |
| ASV_16s_31876 | 0.057337681 | 0.853731908  | 3.551703908 | 0.174252875 | 0.999984314 | NA |
| ASV_16s_31877 | 0.057337681 | 0.853731908  | 3.551703908 | 0.174252875 | 0.999984314 | NA |
| ASV_16s_31878 | 0.023046384 | 0.636940753  | 3.551910064 | 0.092894654 | 0.999998209 | NA |
| ASV_16s_31879 | 0.023046384 | 0.636940753  | 3.551910064 | 0.092894654 | 0.999998209 | NA |
| ASV_16s_31880 | 0.023046384 | 0.636940753  | 3.551910064 | 0.092894654 | 0.999998209 | NA |
| ASV_16s_31881 | 0.023046384 | 0.636940753  | 3.551910064 | 0.092894654 | 0.999998209 | NA |
| ASV_16s_31882 | 0.057020902 | 0.852212843  | 3.551706999 | 0.173535909 | 0.999984535 | NA |
| ASV_16s_31883 | 0.057020902 | 0.852212843  | 3.551706999 | 0.173535909 | 0.999984535 | NA |
| ASV_16s_31884 | 0.05205042  | -0.066603654 | 3.551511745 | 0.326299362 | 0.999867113 | NA |
| ASV_16s_31885 | 0.05205042  | -0.066603654 | 3.551511745 | 0.326299362 | 0.999867113 | NA |
| ASV_16s_31886 | 0.05205042  | -0.066603654 | 3.551511745 | 0.326299362 | 0.999867113 | NA |
| ASV_16s_31887 | 0.05205042  | -0.066603654 | 3.551511745 | 0.326299362 | 0.999867113 | NA |
| ASV_16s_31888 | 0.05205042  | -0.066603654 | 3.551511745 | 0.326299362 | 0.999867113 | NA |
| ASV_16s_31889 | 0.05205042  | -0.066603654 | 3.551511745 | 0.326299362 | 0.999867113 | NA |
| ASV_16s_31890 | 0.05205042  | -0.066603654 | 3.551511745 | 0.326299362 | 0.999867113 | NA |
| ASV_16s_31891 | 0.05205042  | -0.066603654 | 3.551511745 | 0.326299362 | 0.999867113 | NA |
| ASV_16s_31892 | 0.05205042  | -0.066603654 | 3.551511745 | 0.326299362 | 0.999867113 | NA |
| ASV_16s_31893 | 0.05205042  | -0.066603654 | 3.551511745 | 0.326299362 | 0.999867113 | NA |
| ASV_16s_31894 | 0.05205042  | -0.066603654 | 3.551511745 | 0.326299362 | 0.999867113 | NA |
| ASV_16s_31895 | 0.05205042  | -0.066603654 | 3.551511745 | 0.326299362 | 0.999867113 | NA |
| ASV_16s_31896 | 0.05205042  | -0.066603654 | 3.551511745 | 0.326299362 | 0.999867113 | NA |
| ASV_16s_31897 | 0.05205042  | -0.066603654 | 3.551511745 | 0.326299362 | 0.999867113 | NA |
| ASV_16s_31898 | 0.05205042  | -0.066603654 | 3.551511745 | 0.326299362 | 0.999867113 | NA |
| ASV_16s_31899 | 0.05205042  | -0.066603654 | 3.551511745 | 0.326299362 | 0.999867113 | NA |
| ASV_16s_31900 | 0.044383985 | -0.057131115 | 3.551639424 | 0.292245276 | 0.999908451 | NA |
| ASV_16s_31901 | 0.044383985 | -0.057131115 | 3.551639424 | 0.292245276 | 0.999908451 | NA |
| ASV_16s_31902 | 0.044383985 | -0.057131115 | 3.551639424 | 0.292245276 | 0.999908451 | NA |
| ASV_16s_31903 | 0.044383985 | -0.057131115 | 3.551639424 | 0.292245276 | 0.999908451 | NA |
| ASV_16s_31904 | 0.044383985 | -0.057131115 | 3.551639424 | 0.292245276 | 0.999908451 | NA |
| ASV_16s_31905 | 0.044383985 | -0.057131115 | 3.551639424 | 0.292245276 | 0.999908451 | NA |
| ASV_16s_31906 | 0.044383985 | -0.057131115 | 3.551639424 | 0.292245276 | 0.999908451 | NA |
| ASV_16s_31907 | 0.044383985 | -0.057131115 | 3.551639424 | 0.292245276 | 0.999908451 | NA |
| ASV_16s_31908 | 0.044383985 | -0.057131115 | 3.551639424 | 0.292245276 | 0.999908451 | NA |
| ASV_16s_31909 | 0.044383985 | -0.057131115 | 3.551639424 | 0.292245276 | 0.999908451 | NA |
| ASV_16s_31910 | 0.044383985 | -0.057131115 | 3.551639424 | 0.292245276 | 0.999908451 | NA |
| ASV_16s_31911 | 0.044383985 | -0.057131115 | 3.551639424 | 0.292245276 | 0.999908451 | NA |
| ASV_16s_31912 | 0.044383985 | -0.057131115 | 3.551639424 | 0.292245276 | 0.999908451 | NA |
| ASV_16s_31913 | 0.044383985 | -0.057131115 | 3.551639424 | 0.292245276 | 0.999908451 | NA |
| ASV_16s_31914 | 0.044383985 | -0.057131115 | 3.551639424 | 0.292245276 | 0.999908451 | NA |
| ASV_16s_31915 | 0.044383985 | -0.057131115 | 3.551639424 | 0.292245276 | 0.999908451 | NA |
| ASV_16s_31916 | 0.044383985 | -0.057131115 | 3.551639424 | 0.292245276 | 0.999908451 | NA |
| ASV_16s_31917 | 0.044383985 | -0.057131115 | 3.551639424 | 0.292245276 | 0.999908451 | NA |



|               |             |              |             |             |                |
|---------------|-------------|--------------|-------------|-------------|----------------|
| ASV_16s_31985 | 0.049173367 | 0.318258049  | 3.551819807 | 0.300635732 | 0.999899243 NA |
| ASV_16s_31986 | 0.049173367 | 0.318258049  | 3.551819807 | 0.300635732 | 0.999899243 NA |
| ASV_16s_31987 | 0.049173367 | 0.318258049  | 3.551819807 | 0.300635732 | 0.999899243 NA |
| ASV_16s_31988 | 0.049173367 | 0.318258049  | 3.551819807 | 0.300635732 | 0.999899243 NA |
| ASV_16s_31989 | 0.05621591  | 0.315341498  | 3.551696354 | 0.332417016 | 0.999858522 NA |
| ASV_16s_31990 | 0.05621591  | 0.315341498  | 3.551696354 | 0.332417016 | 0.999858522 NA |
| ASV_16s_31991 | 0.05621591  | 0.315341498  | 3.551696354 | 0.332417016 | 0.999858522 NA |
| ASV_16s_31992 | 0.05621591  | 0.315341498  | 3.551696354 | 0.332417016 | 0.999858522 NA |
| ASV_16s_31993 | 0.05621591  | 0.315341498  | 3.551696354 | 0.332417016 | 0.999858522 NA |
| ASV_16s_31994 | 0.05621591  | 0.315341498  | 3.551696354 | 0.332417016 | 0.999858522 NA |
| ASV_16s_31995 | 0.05621591  | 0.315341498  | 3.551696354 | 0.332417016 | 0.999858522 NA |
| ASV_16s_31996 | 0.05621591  | 0.315341498  | 3.551696354 | 0.332417016 | 0.999858522 NA |
| ASV_16s_31997 | 0.05621591  | 0.315341498  | 3.551696354 | 0.332417016 | 0.999858522 NA |
| ASV_16s_31998 | 0.05621591  | 0.315341498  | 3.551696354 | 0.332417016 | 0.999858522 NA |
| ASV_16s_31999 | 0.0348075   | 0.594502597  | 3.551270839 | 0.094647082 | 0.999998089 NA |
| ASV_16s_32000 | 0.0348075   | 0.594502597  | 3.551270839 | 0.094647082 | 0.999998089 NA |
| ASV_16s_32001 | 0.0348075   | 0.594502597  | 3.551270839 | 0.094647082 | 0.999998089 NA |
| ASV_16s_32002 | 0.0348075   | 0.594502597  | 3.551270839 | 0.094647082 | 0.999998089 NA |
| ASV_16s_32003 | 0.0348075   | 0.594502597  | 3.551270839 | 0.094647082 | 0.999998089 NA |
| ASV_16s_32004 | 0.0348075   | 0.594502597  | 3.551270839 | 0.094647082 | 0.999998089 NA |
| ASV_16s_32005 | 0.0348075   | 0.594502597  | 3.551270839 | 0.094647082 | 0.999998089 NA |
| ASV_16s_32006 | 0.050438966 | 0.671836857  | 3.55176537  | 0.280255219 | 0.999920569 NA |
| ASV_16s_32007 | 0.050438966 | 0.671836857  | 3.55176537  | 0.280255219 | 0.999920569 NA |
| ASV_16s_32008 | 0.058816685 | 0.685373104  | 3.551667351 | 0.312098913 | 0.999885652 NA |
| ASV_16s_32009 | 0.058816685 | 0.685373104  | 3.551667351 | 0.312098913 | 0.999885652 NA |
| ASV_16s_32010 | 0.058816685 | 0.685373104  | 3.551667351 | 0.312098913 | 0.999885652 NA |
| ASV_16s_32011 | 0.058816685 | 0.685373104  | 3.551667351 | 0.312098913 | 0.999885652 NA |
| ASV_16s_32012 | 0.058816685 | 0.685373104  | 3.551667351 | 0.312098913 | 0.999885652 NA |
| ASV_16s_32013 | 0.058816685 | 0.685373104  | 3.551667351 | 0.312098913 | 0.999885652 NA |
| ASV_16s_32014 | 0.067298296 | 0.495934497  | 3.55200159  | 0.213992725 | 0.999968298 NA |
| ASV_16s_32015 | 0.043391187 | 0.461394785  | 3.552000084 | 0.196319385 | 0.999976394 NA |
| ASV_16s_32016 | 0.071288264 | 0.220813003  | 3.551981299 | 0.227678436 | 0.999960825 NA |
| ASV_16s_32017 | 0.058611344 | 0.202132009  | 3.551912276 | 0.147656431 | 0.999991124 NA |
| ASV_16s_32018 | 0.048461543 | 0.26393833   | 3.551933832 | 0.226902882 | 0.999961278 NA |
| ASV_16s_32019 | 0.052358279 | 0.093675175  | 3.551906509 | 0.28025351  | 0.99992057 NA  |
| ASV_16s_32020 | 0.048887697 | 0.145789253  | 3.551909388 | 0.272889122 | 0.999927433 NA |
| ASV_16s_32021 | 0.097909139 | 0.687724787  | 3.551684244 | 0.476786282 | 0.999527119 NA |
| ASV_16s_32022 | 0.060974671 | 0.784173089  | 3.551887118 | 0.234578058 | 0.999956626 NA |
| ASV_16s_32023 | 0.060974671 | 0.784173089  | 3.551887118 | 0.234578058 | 0.999956626 NA |
| ASV_16s_32024 | 0.067970898 | 0.306256969  | 3.55196502  | 0.281959159 | 0.999918919 NA |
| ASV_16s_32025 | 0.082934932 | -0.238748721 | 3.551758362 | 0.349346196 | 0.999832754 NA |
| ASV_16s_32026 | 0.082934932 | -0.238748721 | 3.551758362 | 0.349346196 | 0.999832754 NA |
| ASV_16s_32027 | 0.082934932 | -0.238748721 | 3.551758362 | 0.349346196 | 0.999832754 NA |
| ASV_16s_32028 | 0.082232265 | 0.824649277  | 3.551845213 | 0.299732891 | 0.999900264 NA |
| ASV_16s_32029 | 0.057679465 | 0.770091657  | 3.551902391 | 0.226153175 | 0.999961713 NA |
| ASV_16s_32030 | 0.073604449 | 0.824649277  | 3.551845213 | 0.271541138 | 0.999928642 NA |
| ASV_16s_32031 | 0.073604449 | 0.824649277  | 3.551845213 | 0.271541138 | 0.999928642 NA |
| ASV_16s_32032 | 0.073604449 | 0.824649277  | 3.551845213 | 0.271541138 | 0.999928642 NA |
| ASV_16s_32033 | 0.1179071   | 0.816510064  | 3.551679791 | 0.415191133 | 0.999701603 NA |
| ASV_16s_32034 | 0.056899271 | 0.732649573  | 3.551790791 | 0.211165614 | 0.999969707 NA |
| ASV_16s_32035 | 0.037418284 | 0.297781427  | 3.551939706 | 0.190744594 | 0.999978611 NA |
| ASV_16s_32036 | 0.022220235 | 0.302561401  | 3.551960442 | 0.137759237 | 0.999993011 NA |
| ASV_16s_32037 | 0.079428014 | 0.28673874   | 3.551814588 | 0.328309803 | 0.999864331 NA |
| ASV_16s_32038 | 0.079428014 | 0.28673874   | 3.551814588 | 0.328309803 | 0.999864331 NA |
| ASV_16s_32039 | 0.031158077 | 0.298875818  | 3.551951589 | 0.180665877 | 0.999982243 NA |
| ASV_16s_32040 | 0.073604449 | -0.252245594 | 3.551686878 | 0.306563549 | 0.999892364 NA |
| ASV_16s_32041 | 0.073604449 | -0.252245594 | 3.551686878 | 0.306563549 | 0.999892364 NA |
| ASV_16s_32042 | 0.037815993 | -0.102341814 | 3.551825723 | 0.194220675 | 0.999977247 NA |
| ASV_16s_32043 | 0.12901667  | -0.252245594 | 3.551686878 | 0.54035644  | 0.999284885 NA |
| ASV_16s_32044 | 0.101378589 | -0.208297596 | 3.551872308 | 0.401492606 | 0.999733258 NA |
| ASV_16s_32045 | 0.101378589 | -0.208297596 | 3.551872308 | 0.401492606 | 0.999733258 NA |
| ASV_16s_32046 | 0.101378589 | -0.208297596 | 3.551872308 | 0.401492606 | 0.999733258 NA |
| ASV_16s_32047 | 0.101378589 | -0.208297596 | 3.551872308 | 0.401492606 | 0.999733258 NA |
| ASV_16s_32048 | 0.101378589 | -0.208297596 | 3.551872308 | 0.401492606 | 0.999733258 NA |
| ASV_16s_32049 | 0.101378589 | -0.208297596 | 3.551872308 | 0.401492606 | 0.999733258 NA |
| ASV_16s_32050 | 0.101378589 | -0.208297596 | 3.551872308 | 0.401492606 | 0.999733258 NA |
| ASV_16s_32051 | 0.101378589 | -0.208297596 | 3.551872308 | 0.401492606 | 0.999733258 NA |

|               |             |              |             |             |                |
|---------------|-------------|--------------|-------------|-------------|----------------|
| ASV_16s_32052 | 0.101378589 | -0.208297596 | 3.551872308 | 0.401492606 | 0.999733258 NA |
| ASV_16s_32053 | 0.089737152 | 0.341540105  | 3.5518614   | 0.290273259 | 0.999910526 NA |
| ASV_16s_32054 | 0.089737152 | 0.341540105  | 3.5518614   | 0.290273259 | 0.999910526 NA |
| ASV_16s_32055 | 0.065366663 | 0.881846653  | 3.551648287 | 0.194710857 | 0.999977049 NA |
| ASV_16s_32056 | 0.065366663 | 0.881846653  | 3.551648287 | 0.194710857 | 0.999977049 NA |
| ASV_16s_32057 | 0.065366663 | 0.881846653  | 3.551648287 | 0.194710857 | 0.999977049 NA |
| ASV_16s_32058 | 0.065366663 | 0.881846653  | 3.551648287 | 0.194710857 | 0.999977049 NA |
| ASV_16s_32059 | 0.037248055 | -0.034857153 | 3.551750538 | 0.263176262 | 0.999935837 NA |
| ASV_16s_32060 | 0.037248055 | -0.034857153 | 3.551750538 | 0.263176262 | 0.999935837 NA |
| ASV_16s_32061 | 0.037248055 | -0.034857153 | 3.551750538 | 0.263176262 | 0.999935837 NA |
| ASV_16s_32062 | 0.037248055 | -0.034857153 | 3.551750538 | 0.263176262 | 0.999935837 NA |
| ASV_16s_32063 | 0.037248055 | -0.034857153 | 3.551750538 | 0.263176262 | 0.999935837 NA |
| ASV_16s_32064 | 0.115866208 | -0.026838799 | 3.551218382 | 0.739507834 | 0.99801342 NA  |
| ASV_16s_32065 | 0.115866208 | -0.026838799 | 3.551218382 | 0.739507834 | 0.99801342 NA  |
| ASV_16s_32066 | 0.088226066 | 0.32669909   | 3.551451881 | 0.643069739 | 0.998735954 NA |
| ASV_16s_32067 | 0.115866208 | -0.026838799 | 3.551218382 | 0.739507834 | 0.99801342 NA  |
| ASV_16s_32068 | 0.115866208 | -0.026838799 | 3.551218382 | 0.739507834 | 0.99801342 NA  |
| ASV_16s_32069 | 0.115866208 | -0.026838799 | 3.551218382 | 0.739507834 | 0.99801342 NA  |
| ASV_16s_32070 | 0.103075536 | -0.023920433 | 3.551298375 | 0.662374472 | 0.998608427 NA |
| ASV_16s_32071 | 0.103075536 | -0.023920433 | 3.551298375 | 0.662374472 | 0.998608427 NA |
| ASV_16s_32072 | 0.103075536 | -0.023920433 | 3.551298375 | 0.662374472 | 0.998608427 NA |
| ASV_16s_32073 | 0.103075536 | -0.023920433 | 3.551298375 | 0.662374472 | 0.998608427 NA |
| ASV_16s_32074 | 0.103075536 | -0.023920433 | 3.551298375 | 0.662374472 | 0.998608427 NA |
| ASV_16s_32075 | 0.103075536 | -0.023920433 | 3.551298375 | 0.662374472 | 0.998608427 NA |
| ASV_16s_32076 | 0.103075536 | -0.023920433 | 3.551298375 | 0.662374472 | 0.998608427 NA |
| ASV_16s_32077 | 0.103075536 | -0.023920433 | 3.551298375 | 0.662374472 | 0.998608427 NA |
| ASV_16s_32078 | 0.103075536 | -0.023920433 | 3.551298375 | 0.662374472 | 0.998608427 NA |
| ASV_16s_32079 | 0.103075536 | -0.023920433 | 3.551298375 | 0.662374472 | 0.998608427 NA |
| ASV_16s_32080 | 0.08221957  | -0.01821748  | 3.551479006 | 0.541038182 | 0.999281911 NA |
| ASV_16s_32081 | 0.08221957  | -0.01821748  | 3.551479006 | 0.541038182 | 0.999281911 NA |
| ASV_16s_32082 | 0.08221957  | -0.01821748  | 3.551479006 | 0.541038182 | 0.999281911 NA |
| ASV_16s_32083 | 0.08221957  | -0.01821748  | 3.551479006 | 0.541038182 | 0.999281911 NA |
| ASV_16s_32084 | 0.08221957  | -0.01821748  | 3.551479006 | 0.541038182 | 0.999281911 NA |
| ASV_16s_32085 | 0.08221957  | -0.01821748  | 3.551479006 | 0.541038182 | 0.999281911 NA |
| ASV_16s_32086 | 0.08221957  | -0.01821748  | 3.551479006 | 0.541038182 | 0.999281911 NA |
| ASV_16s_32087 | 0.08221957  | -0.01821748  | 3.551479006 | 0.541038182 | 0.999281911 NA |
| ASV_16s_32088 | 0.08221957  | -0.01821748  | 3.551479006 | 0.541038182 | 0.999281911 NA |
| ASV_16s_32089 | 0.08221957  | -0.01821748  | 3.551479006 | 0.541038182 | 0.999281911 NA |
| ASV_16s_32090 | 0.08221957  | -0.01821748  | 3.551479006 | 0.541038182 | 0.999281911 NA |
| ASV_16s_32091 | 0.08221957  | -0.01821748  | 3.551479006 | 0.541038182 | 0.999281911 NA |
| ASV_16s_32092 | 0.08221957  | -0.01821748  | 3.551479006 | 0.541038182 | 0.999281911 NA |
| ASV_16s_32093 | 0.08221957  | -0.01821748  | 3.551479006 | 0.541038182 | 0.999281911 NA |
| ASV_16s_32094 | 0.08221957  | -0.01821748  | 3.551479006 | 0.541038182 | 0.999281911 NA |
| ASV_16s_32095 | 0.08221957  | -0.01821748  | 3.551479006 | 0.541038182 | 0.999281911 NA |
| ASV_16s_32096 | 0.08221957  | -0.01821748  | 3.551479006 | 0.541038182 | 0.999281911 NA |
| ASV_16s_32097 | 0.08221957  | -0.01821748  | 3.551479006 | 0.541038182 | 0.999281911 NA |
| ASV_16s_32098 | 0.08221957  | -0.01821748  | 3.551479006 | 0.541038182 | 0.999281911 NA |
| ASV_16s_32099 | 0.08221957  | -0.01821748  | 3.551479006 | 0.541038182 | 0.999281911 NA |
| ASV_16s_32100 | 0.08221957  | -0.01821748  | 3.551479006 | 0.541038182 | 0.999281911 NA |
| ASV_16s_32101 | 0.08221957  | -0.01821748  | 3.551479006 | 0.541038182 | 0.999281911 NA |
| ASV_16s_32102 | 0.08221957  | -0.01821748  | 3.551479006 | 0.541038182 | 0.999281911 NA |
| ASV_16s_32103 | 0.08221957  | -0.01821748  | 3.551479006 | 0.541038182 | 0.999281911 NA |
| ASV_16s_32104 | 0.064377733 | -0.003785504 | 3.551646713 | 0.44335821  | 0.999628591 NA |
| ASV_16s_32105 | 0.064377733 | -0.003785504 | 3.551646713 | 0.44335821  | 0.999628591 NA |
| ASV_16s_32106 | 0.049143587 | 0.025059862  | 3.551752417 | 0.36656875  | 0.999803385 NA |
| ASV_16s_32107 | 0.049143587 | 0.025059862  | 3.551752417 | 0.36656875  | 0.999803385 NA |
| ASV_16s_32108 | 0.049143587 | 0.025059862  | 3.551752417 | 0.36656875  | 0.999803385 NA |
| ASV_16s_32109 | 0.056152803 | -0.057162648 | 3.55153867  | 0.368601948 | 0.999799699 NA |
| ASV_16s_32110 | 0.056152803 | -0.057162648 | 3.55153867  | 0.368601948 | 0.999799699 NA |
| ASV_16s_32111 | 0.056152803 | -0.057162648 | 3.55153867  | 0.368601948 | 0.999799699 NA |
| ASV_16s_32112 | 0.056152803 | -0.057162648 | 3.55153867  | 0.368601948 | 0.999799699 NA |
| ASV_16s_32113 | 0.056152803 | -0.057162648 | 3.55153867  | 0.368601948 | 0.999799699 NA |
| ASV_16s_32114 | 0.056152803 | -0.057162648 | 3.55153867  | 0.368601948 | 0.999799699 NA |
| ASV_16s_32115 | 0.041011739 | -0.026191337 | 3.551760944 | 0.299493056 | 0.999900534 NA |
| ASV_16s_32116 | 0.041011739 | -0.026191337 | 3.551760944 | 0.299493056 | 0.999900534 NA |
| ASV_16s_32117 | 0.041011739 | -0.026191337 | 3.551760944 | 0.299493056 | 0.999900534 NA |
| ASV_16s_32118 | 0.041011739 | -0.026191337 | 3.551760944 | 0.299493056 | 0.999900534 NA |

|               |             |              |             |             |             |    |
|---------------|-------------|--------------|-------------|-------------|-------------|----|
| ASV_16s_32119 | 0.041011739 | -0.026191337 | 3.551760944 | 0.299493056 | 0.999900534 | NA |
| ASV_16s_32120 | 0.041011739 | -0.026191337 | 3.551760944 | 0.299493056 | 0.999900534 | NA |
| ASV_16s_32121 | 0.041011739 | -0.026191337 | 3.551760944 | 0.299493056 | 0.999900534 | NA |
| ASV_16s_32122 | 0.041011739 | -0.026191337 | 3.551760944 | 0.299493056 | 0.999900534 | NA |
| ASV_16s_32123 | 0.041011739 | -0.026191337 | 3.551760944 | 0.299493056 | 0.999900534 | NA |
| ASV_16s_32124 | 0.041011739 | -0.026191337 | 3.551760944 | 0.299493056 | 0.999900534 | NA |
| ASV_16s_32125 | 0.041011739 | -0.026191337 | 3.551760944 | 0.299493056 | 0.999900534 | NA |
| ASV_16s_32126 | 0.041011739 | -0.026191337 | 3.551760944 | 0.299493056 | 0.999900534 | NA |
| ASV_16s_32127 | 0.040274827 | -0.023711884 | 3.551768914 | 0.296445429 | 0.999903918 | NA |
| ASV_16s_32128 | 0.040274827 | -0.023711884 | 3.551768914 | 0.296445429 | 0.999903918 | NA |
| ASV_16s_32129 | 0.040274827 | -0.023711884 | 3.551768914 | 0.296445429 | 0.999903918 | NA |
| ASV_16s_32130 | 0.040274827 | -0.023711884 | 3.551768914 | 0.296445429 | 0.999903918 | NA |
| ASV_16s_32131 | 0.040274827 | -0.023711884 | 3.551768914 | 0.296445429 | 0.999903918 | NA |
| ASV_16s_32132 | 0.040274827 | -0.023711884 | 3.551768914 | 0.296445429 | 0.999903918 | NA |
| ASV_16s_32133 | 0.040274827 | -0.023711884 | 3.551768914 | 0.296445429 | 0.999903918 | NA |
| ASV_16s_32134 | 0.040274827 | -0.023711884 | 3.551768914 | 0.296445429 | 0.999903918 | NA |
| ASV_16s_32135 | 0.040274827 | -0.023711884 | 3.551768914 | 0.296445429 | 0.999903918 | NA |
| ASV_16s_32136 | 0.040274827 | -0.023711884 | 3.551768914 | 0.296445429 | 0.999903918 | NA |
| ASV_16s_32137 | 0.040274827 | -0.023711884 | 3.551768914 | 0.296445429 | 0.999903918 | NA |
| ASV_16s_32138 | 0.040274827 | -0.023711884 | 3.551768914 | 0.296445429 | 0.999903918 | NA |
| ASV_16s_32139 | 0.040274827 | -0.023711884 | 3.551768914 | 0.296445429 | 0.999903918 | NA |
| ASV_16s_32140 | 0.067970898 | -0.06567781  | 3.551382791 | 0.429109681 | 0.999666892 | NA |
| ASV_16s_32141 | 0.067970898 | -0.06567781  | 3.551382791 | 0.429109681 | 0.999666892 | NA |
| ASV_16s_32142 | 0.067970898 | -0.06567781  | 3.551382791 | 0.429109681 | 0.999666892 | NA |
| ASV_16s_32143 | 0.067970898 | -0.06567781  | 3.551382791 | 0.429109681 | 0.999666892 | NA |
| ASV_16s_32144 | 0.067970898 | -0.06567781  | 3.551382791 | 0.429109681 | 0.999666892 | NA |
| ASV_16s_32145 | 0.067970898 | -0.06567781  | 3.551382791 | 0.429109681 | 0.999666892 | NA |
| ASV_16s_32146 | 0.067970898 | -0.06567781  | 3.551382791 | 0.429109681 | 0.999666892 | NA |
| ASV_16s_32147 | 0.067970898 | -0.06567781  | 3.551382791 | 0.429109681 | 0.999666892 | NA |
| ASV_16s_32148 | 0.049971425 | -0.049854353 | 3.551636493 | 0.339124001 | 0.999848669 | NA |
| ASV_16s_32149 | 0.049971425 | -0.049854353 | 3.551636493 | 0.339124001 | 0.999848669 | NA |
| ASV_16s_32150 | 0.049971425 | -0.049854353 | 3.551636493 | 0.339124001 | 0.999848669 | NA |
| ASV_16s_32151 | 0.049971425 | -0.049854353 | 3.551636493 | 0.339124001 | 0.999848669 | NA |
| ASV_16s_32152 | 0.049971425 | -0.049854353 | 3.551636493 | 0.339124001 | 0.999848669 | NA |
| ASV_16s_32153 | 0.049971425 | -0.049854353 | 3.551636493 | 0.339124001 | 0.999848669 | NA |
| ASV_16s_32154 | 0.049971425 | -0.049854353 | 3.551636493 | 0.339124001 | 0.999848669 | NA |
| ASV_16s_32155 | 0.060272271 | 0.347087229  | 3.551855697 | 0.317786199 | 0.999878458 | NA |
| ASV_16s_32156 | 0.056059194 | 0.34201184   | 3.551847468 | 0.388629117 | 0.999760807 | NA |
| ASV_16s_32157 | 0.056059194 | 0.34201184   | 3.551847468 | 0.388629117 | 0.999760807 | NA |
| ASV_16s_32158 | 0.056059194 | 0.34201184   | 3.551847468 | 0.388629117 | 0.999760807 | NA |
| ASV_16s_32159 | 0.056059194 | 0.34201184   | 3.551847468 | 0.388629117 | 0.999760807 | NA |
| ASV_16s_32160 | 0.056059194 | 0.34201184   | 3.551847468 | 0.388629117 | 0.999760807 | NA |
| ASV_16s_32161 | 0.056059194 | 0.34201184   | 3.551847468 | 0.388629117 | 0.999760807 | NA |
| ASV_16s_32162 | 0.056059194 | 0.34201184   | 3.551847468 | 0.388629117 | 0.999760807 | NA |
| ASV_16s_32163 | 0.105487858 | 0.358771062  | 3.551541863 | 0.656265178 | 0.998649673 | NA |
| ASV_16s_32164 | 0.062277249 | 0.640456947  | 3.551875254 | 0.31684979  | 0.999879664 | NA |
| ASV_16s_32165 | 0.082239529 | 0.350083605  | 3.5516987   | 0.525830693 | 0.999346295 | NA |
| ASV_16s_32166 | 0.056059194 | 0.34201184   | 3.551847468 | 0.388629117 | 0.999760807 | NA |
| ASV_16s_32167 | 0.056059194 | 0.34201184   | 3.551847468 | 0.388629117 | 0.999760807 | NA |
| ASV_16s_32168 | 0.092057155 | 0.35456443   | 3.551630078 | 0.581178922 | 0.999091627 | NA |
| ASV_16s_32169 | 0.092057155 | 0.35456443   | 3.551630078 | 0.581178922 | 0.999091627 | NA |
| ASV_16s_32170 | 0.092057155 | 0.35456443   | 3.551630078 | 0.581178922 | 0.999091627 | NA |
| ASV_16s_32171 | 0.092057155 | 0.35456443   | 3.551630078 | 0.581178922 | 0.999091627 | NA |
| ASV_16s_32172 | 0.092057155 | 0.35456443   | 3.551630078 | 0.581178922 | 0.999091627 | NA |
| ASV_16s_32173 | 0.092057155 | 0.35456443   | 3.551630078 | 0.581178922 | 0.999091627 | NA |
| ASV_16s_32174 | 0.092057155 | 0.35456443   | 3.551630078 | 0.581178922 | 0.999091627 | NA |
| ASV_16s_32175 | 0.146678411 | 0.360263018  | 3.551287283 | 0.905846647 | 0.996207829 | NA |
| ASV_16s_32176 | 0.049834687 | 0.340184103  | 3.55188394  | 0.358985985 | 0.99981672  | NA |
| ASV_16s_32177 | 0.049834687 | 0.340184103  | 3.55188394  | 0.358985985 | 0.99981672  | NA |
| ASV_16s_32178 | 0.049834687 | 0.340184103  | 3.55188394  | 0.358985985 | 0.99981672  | NA |
| ASV_16s_32179 | 0.049834687 | 0.340184103  | 3.55188394  | 0.358985985 | 0.99981672  | NA |
| ASV_16s_32180 | 0.049834687 | 0.340184103  | 3.55188394  | 0.358985985 | 0.99981672  | NA |
| ASV_16s_32181 | 0.049834687 | 0.340184103  | 3.55188394  | 0.358985985 | 0.99981672  | NA |
| ASV_16s_32182 | 0.049834687 | 0.340184103  | 3.55188394  | 0.358985985 | 0.99981672  | NA |
| ASV_16s_32183 | 0.049834687 | 0.340184103  | 3.55188394  | 0.358985985 | 0.99981672  | NA |
| ASV_16s_32184 | 0.049834687 | 0.340184103  | 3.55188394  | 0.358985985 | 0.99981672  | NA |
| ASV_16s_32185 | 0.049834687 | 0.340184103  | 3.55188394  | 0.358985985 | 0.99981672  | NA |





|               |             |             |             |             |             |    |
|---------------|-------------|-------------|-------------|-------------|-------------|----|
| ASV_16s_32320 | 0.05205042  | 0.314640676 | 3.551849914 | 0.335743425 | 0.999853692 | NA |
| ASV_16s_32321 | 0.05205042  | 0.314640676 | 3.551849914 | 0.335743425 | 0.999853692 | NA |
| ASV_16s_32322 | 0.05205042  | 0.314640676 | 3.551849914 | 0.335743425 | 0.999853692 | NA |
| ASV_16s_32323 | 0.05205042  | 0.314640676 | 3.551849914 | 0.335743425 | 0.999853692 | NA |
| ASV_16s_32324 | 0.05205042  | 0.314640676 | 3.551849914 | 0.335743425 | 0.999853692 | NA |
| ASV_16s_32325 | 0.05205042  | 0.314640676 | 3.551849914 | 0.335743425 | 0.999853692 | NA |
| ASV_16s_32326 | 0.097992329 | 0.315940457 | 3.551318574 | 0.576741181 | 0.999114163 | NA |
| ASV_16s_32327 | 0.070083346 | 0.595498088 | 3.550942766 | 0.215072113 | 0.999967748 | NA |
| ASV_16s_32328 | 0.070083346 | 0.595498088 | 3.550942766 | 0.215072113 | 0.999967748 | NA |
| ASV_16s_32329 | 0.070083346 | 0.595498088 | 3.550942766 | 0.215072113 | 0.999967748 | NA |
| ASV_16s_32330 | 0.070083346 | 0.595498088 | 3.550942766 | 0.215072113 | 0.999967748 | NA |
| ASV_16s_32331 | 0.049569543 | 0.669686902 | 3.551774393 | 0.277090972 | 0.99992357  | NA |
| ASV_16s_32332 | 0.049569543 | 0.669686902 | 3.551774393 | 0.277090972 | 0.99992357  | NA |
| ASV_16s_32333 | 0.049569543 | 0.669686902 | 3.551774393 | 0.277090972 | 0.99992357  | NA |
| ASV_16s_32334 | 0.089550846 | 0.68657471  | 3.551294712 | 0.445354699 | 0.999622995 | NA |
| ASV_16s_32335 | 0.089550846 | 0.68657471  | 3.551294712 | 0.445354699 | 0.999622995 | NA |
| ASV_16s_32336 | 0.089550846 | 0.68657471  | 3.551294712 | 0.445354699 | 0.999622995 | NA |
| ASV_16s_32337 | 0.089550846 | 0.68657471  | 3.551294712 | 0.445354699 | 0.999622995 | NA |
| ASV_16s_32338 | 0.089550846 | 0.68657471  | 3.551294712 | 0.445354699 | 0.999622995 | NA |
| ASV_16s_32339 | 0.089550846 | 0.68657471  | 3.551294712 | 0.445354699 | 0.999622995 | NA |
| ASV_16s_32340 | 0.089550846 | 0.68657471  | 3.551294712 | 0.445354699 | 0.999622995 | NA |
| ASV_16s_32341 | 0.089550846 | 0.68657471  | 3.551294712 | 0.445354699 | 0.999622995 | NA |
| ASV_16s_32342 | 0.089550846 | 0.68657471  | 3.551294712 | 0.445354699 | 0.999622995 | NA |
| ASV_16s_32343 | 0.089550846 | 0.68657471  | 3.551294712 | 0.445354699 | 0.999622995 | NA |
| ASV_16s_32344 | 0.093300467 | 0.795125051 | 3.551461614 | 0.381639139 | 0.999774923 | NA |
| ASV_16s_32345 | 0.08508866  | 0.829547722 | 3.551845994 | 0.316384736 | 0.999880259 | NA |
| ASV_16s_32346 | 0.110173763 | 0.717596464 | 3.551490789 | 0.608971963 | 0.998941638 | NA |
| ASV_16s_32347 | 0.110173763 | 0.717596464 | 3.551490789 | 0.608971963 | 0.998941638 | NA |
| ASV_16s_32348 | 0.110173763 | 0.717596464 | 3.551490789 | 0.608971963 | 0.998941638 | NA |
| ASV_16s_32349 | 0.110173763 | 0.717596464 | 3.551490789 | 0.608971963 | 0.998941638 | NA |
| ASV_16s_32350 | 0.110173763 | 0.717596464 | 3.551490789 | 0.608971963 | 0.998941638 | NA |
| ASV_16s_32351 | 0.110173763 | 0.717596464 | 3.551490789 | 0.608971963 | 0.998941638 | NA |
| ASV_16s_32352 | 0.090017699 | 0.873366381 | 3.551763675 | 0.372779504 | 0.999791976 | NA |
| ASV_16s_32353 | 0.062618301 | 0.71946294  | 3.551854573 | 0.279424108 | 0.999921365 | NA |
| ASV_16s_32354 | 0.081370171 | 0.685692861 | 3.551653275 | 0.468377017 | 0.999554232 | NA |
| ASV_16s_32355 | 0.081370171 | 0.685692861 | 3.551653275 | 0.468377017 | 0.999554232 | NA |
| ASV_16s_32356 | 0.081370171 | 0.685692861 | 3.551653275 | 0.468377017 | 0.999554232 | NA |
| ASV_16s_32357 | 0.081370171 | 0.685692861 | 3.551653275 | 0.468377017 | 0.999554232 | NA |
| ASV_16s_32358 | 0.081370171 | 0.685692861 | 3.551653275 | 0.468377017 | 0.999554232 | NA |
| ASV_16s_32359 | 0.081370171 | 0.685692861 | 3.551653275 | 0.468377017 | 0.999554232 | NA |
| ASV_16s_32360 | 0.081370171 | 0.685692861 | 3.551653275 | 0.468377017 | 0.999554232 | NA |
| ASV_16s_32361 | 0.081370171 | 0.685692861 | 3.551653275 | 0.468377017 | 0.999554232 | NA |
| ASV_16s_32362 | 0.081370171 | 0.685692861 | 3.551653275 | 0.468377017 | 0.999554232 | NA |
| ASV_16s_32363 | 0.081370171 | 0.685692861 | 3.551653275 | 0.468377017 | 0.999554232 | NA |
| ASV_16s_32364 | 0.076819676 | 0.677510129 | 3.55167913  | 0.447078349 | 0.999618117 | NA |
| ASV_16s_32365 | 0.079536092 | 0.80299018  | 3.551829069 | 0.333159948 | 0.999857453 | NA |
| ASV_16s_32366 | 0.081370171 | 0.685692861 | 3.551653275 | 0.468377017 | 0.999554232 | NA |
| ASV_16s_32367 | 0.081370171 | 0.685692861 | 3.551653275 | 0.468377017 | 0.999554232 | NA |
| ASV_16s_32368 | 0.081370171 | 0.685692861 | 3.551653275 | 0.468377017 | 0.999554232 | NA |
| ASV_16s_32369 | 0.081370171 | 0.685692861 | 3.551653275 | 0.468377017 | 0.999554232 | NA |
| ASV_16s_32370 | 0.06885631  | 0.662060478 | 3.551730811 | 0.410883108 | 0.999711822 | NA |
| ASV_16s_32371 | 0.06885631  | 0.662060478 | 3.551730811 | 0.410883108 | 0.999711822 | NA |
| ASV_16s_32372 | 0.06885631  | 0.662060478 | 3.551730811 | 0.410883108 | 0.999711822 | NA |
| ASV_16s_32373 | 0.06885631  | 0.662060478 | 3.551730811 | 0.410883108 | 0.999711822 | NA |
| ASV_16s_32374 | 0.06885631  | 0.662060478 | 3.551730811 | 0.410883108 | 0.999711822 | NA |
| ASV_16s_32375 | 0.06885631  | 0.662060478 | 3.551730811 | 0.410883108 | 0.999711822 | NA |
| ASV_16s_32376 | 0.06885631  | 0.662060478 | 3.551730811 | 0.410883108 | 0.999711822 | NA |
| ASV_16s_32377 | 0.06885631  | 0.662060478 | 3.551730811 | 0.410883108 | 0.999711822 | NA |
| ASV_16s_32378 | 0.06885631  | 0.662060478 | 3.551730811 | 0.410883108 | 0.999711822 | NA |
| ASV_16s_32379 | 0.06885631  | 0.662060478 | 3.551730811 | 0.410883108 | 0.999711822 | NA |
| ASV_16s_32380 | 0.06885631  | 0.662060478 | 3.551730811 | 0.410883108 | 0.999711822 | NA |
| ASV_16s_32381 | 0.06885631  | 0.662060478 | 3.551730811 | 0.410883108 | 0.999711822 | NA |
| ASV_16s_32382 | 0.06885631  | 0.662060478 | 3.551730811 | 0.410883108 | 0.999711822 | NA |
| ASV_16s_32383 | 0.06885631  | 0.662060478 | 3.551730811 | 0.410883108 | 0.999711822 | NA |
| ASV_16s_32384 | 0.06885631  | 0.662060478 | 3.551730811 | 0.410883108 | 0.999711822 | NA |
| ASV_16s_32385 | 0.06885631  | 0.662060478 | 3.551730811 | 0.410883108 | 0.999711822 | NA |
| ASV_16s_32386 | 0.06885631  | 0.662060478 | 3.551730811 | 0.410883108 | 0.999711822 | NA |























|               |             |              |             |              |                |
|---------------|-------------|--------------|-------------|--------------|----------------|
| ASV_16s_32990 | 0.017783487 | 0.200095249  | 3.55151914  | 0.023666407  | 0.999999985 NA |
| ASV_16s_32991 | 0.011545384 | -0.018459306 | 3.55162707  | -0.010849491 | 1 NA           |
| ASV_16s_32992 | 0.014525098 | 0.045054256  | 3.551596949 | 0.004467809  | 1 NA           |
| ASV_16s_32993 | 0.026443953 | 0.23655968   | 3.551464301 | 0.069521364  | 0.999999345 NA |
| ASV_16s_32994 | 0.013724363 | 0.269088817  | 3.551741867 | -0.006752295 | 1 NA           |
| ASV_16s_32995 | 0.018144905 | 0.253240733  | 3.551650011 | 0.018053149  | 0.999999994 NA |
| ASV_16s_33005 | 0.028907369 | 0.589347203  | 3.551370929 | 0.062405564  | 0.999999955 NA |
| ASV_16s_33006 | 0.057400182 | 0.684609462  | 3.551688169 | 0.296959011  | 0.999903353 NA |
| ASV_16s_33007 | 0.057400182 | 0.684609462  | 3.551688169 | 0.296959011  | 0.999903353 NA |
| ASV_16s_33008 | 0.057400182 | 0.684609462  | 3.551688169 | 0.296959011  | 0.999903353 NA |
| ASV_16s_33009 | 0.057400182 | 0.684609462  | 3.551688169 | 0.296959011  | 0.999903353 NA |
| ASV_16s_33010 | 0.057400182 | 0.684609462  | 3.551688169 | 0.296959011  | 0.999903353 NA |
| ASV_16s_33011 | 0.045063221 | 0.657655675  | 3.551825174 | 0.249026243  | 0.999946831 NA |
| ASV_16s_33012 | 0.046677491 | 0.020458121  | 3.551905344 | 0.176061919  | 0.999983748 NA |
| ASV_16s_33013 | 0.047477182 | 0.024598665  | 3.551881946 | 0.195445663  | 0.999976751 NA |
| ASV_16s_33014 | 0.070846635 | -0.165491688 | 3.551856991 | 0.247507067  | 0.999947927 NA |
| ASV_16s_33015 | 0.083463898 | 0.497512975  | 3.551925171 | 0.211999028  | 0.999969296 NA |
| ASV_16s_33016 | 0.042313433 | 0.450047327  | 3.551998291 | 0.143486625  | 0.999991957 NA |
| ASV_16s_33017 | 0.050984332 | 0.445447471  | 3.551982051 | 0.239706597  | 0.999953308 NA |
| ASV_16s_33018 | 0.046511103 | 0.450047327  | 3.551998291 | 0.167206499  | 0.999986387 NA |
| ASV_16s_33019 | 0.05057974  | -0.161143637 | 3.551899974 | 0.158009548  | 0.999988793 NA |
| ASV_16s_33020 | 0.049932201 | 0.032272388  | 3.551952803 | 0.175866755  | 0.99998381 NA  |
| ASV_16s_33021 | 0.051055614 | 0.032272388  | 3.551952803 | 0.178685264  | 0.999982902 NA |
| ASV_16s_33022 | 0.046237832 | 0.034843877  | 3.551938441 | 0.130733734  | 0.999994165 NA |
| ASV_16s_33023 | 0.050972143 | 0.032272386  | 3.551952803 | 0.165172013  | 0.999986948 NA |
| ASV_16s_33024 | 0.063513255 | -0.155223738 | 3.55183181  | 0.249393965  | 0.999946564 NA |
| ASV_16s_33025 | 0.052267028 | 0.212844496  | 3.551953681 | 0.19675362   | 0.999976214 NA |
| ASV_16s_33026 | 0.07521146  | 0.321563922  | 3.55198448  | 0.139963972  | 0.999992618 NA |
| ASV_16s_33027 | 0.053382135 | 0.081039415  | 3.551965019 | 0.193575741  | 0.999977504 NA |
| ASV_16s_33028 | 0.047862752 | 0.081039415  | 3.551965019 | 0.17778923   | 0.999983195 NA |
| ASV_16s_33029 | 0.04383065  | 0.585710051  | 3.551993878 | 0.168549603  | 0.999986008 NA |
| ASV_16s_33030 | 0.05222599  | 0.595151857  | 3.551973263 | 0.217901987  | 0.999966276 NA |
| ASV_16s_33031 | 0.062247159 | 0.129797284  | 3.551978075 | 0.194024986  | 0.999977325 NA |
| ASV_16s_33032 | 0.054239904 | 0.126843971  | 3.551960001 | 0.210187349  | 0.999970184 NA |
| ASV_16s_33033 | 0.051380504 | 0.126843974  | 3.551960001 | 0.20397269   | 0.999973092 NA |
| ASV_16s_33034 | 0.06528884  | 0.13506968   | 3.551943546 | 0.141521752  | 0.999992331 NA |
| ASV_16s_33035 | 0.07065965  | 0.7755461    | 3.551959952 | 0.171808126  | 0.999985057 NA |
| ASV_16s_33036 | 0.064560409 | 0.012168309  | 3.551729394 | 0.366121117  | 0.999804191 NA |
| ASV_16s_33037 | 0.049820664 | 0.441651628  | 3.551918543 | 0.217410631  | 0.999966535 NA |
| ASV_16s_33038 | 0.053107407 | 0.17010656   | 3.551919455 | 0.22480075   | 0.999962489 NA |
| ASV_16s_33039 | 0.070375538 | 0.193397634  | 3.551784258 | 0.389338272  | 0.999759342 NA |
| ASV_16s_33040 | 0.050980787 | 0.114569435  | 3.551753561 | 0.031971534  | 0.999999956 NA |
| ASV_16s_33041 | 0.050012147 | 0.333755687  | 3.551936195 | 0.256721924  | 0.999941031 NA |
| ASV_16s_33042 | 0.04805934  | 0.218503048  | 3.551924357 | 0.251749875  | 0.999944826 NA |
| ASV_16s_33043 | 0.053592758 | 0.751544192  | 3.551923076 | 0.206068895  | 0.999972135 NA |
| ASV_16s_33044 | 0.053592758 | 0.751544192  | 3.551923076 | 0.206068895  | 0.999972135 NA |
| ASV_16s_33045 | 0.053592758 | 0.751544192  | 3.551923076 | 0.206068895  | 0.999972135 NA |
| ASV_16s_33046 | 0.053592758 | 0.751544192  | 3.551923076 | 0.206068895  | 0.999972135 NA |
| ASV_16s_33047 | 0.053592758 | 0.751544192  | 3.551923076 | 0.206068895  | 0.999972135 NA |
| ASV_16s_33048 | 0.053592758 | 0.751544192  | 3.551923076 | 0.206068895  | 0.999972135 NA |
| ASV_16s_33049 | 0.053592758 | 0.751544192  | 3.551923076 | 0.206068895  | 0.999972135 NA |
| ASV_16s_33050 | 0.053592758 | 0.751544192  | 3.551923076 | 0.206068895  | 0.999972135 NA |
| ASV_16s_33051 | 0.053592758 | 0.751544192  | 3.551923076 | 0.206068895  | 0.999972135 NA |
| ASV_16s_33052 | 0.069166044 | 0.308537873  | 3.551974668 | 0.28150445   | 0.999919362 NA |
| ASV_16s_33053 | 0.069126218 | 0.308537873  | 3.551974668 | 0.281359608  | 0.999919502 NA |
| ASV_16s_33054 | 0.069126218 | 0.308537873  | 3.551974668 | 0.281359608  | 0.999919502 NA |
| ASV_16s_33055 | 0.06678894  | 0.308537873  | 3.551974668 | 0.272853449  | 0.999927465 NA |
| ASV_16s_33056 | 0.056784445 | 0.796208532  | 3.551898253 | 0.214927968  | 0.999967822 NA |
| ASV_16s_33057 | 0.056784445 | 0.796208532  | 3.551898253 | 0.214927968  | 0.999967822 NA |
| ASV_16s_33058 | 0.056784445 | 0.796208532  | 3.551898253 | 0.214927968  | 0.999967822 NA |
| ASV_16s_33059 | 0.056784445 | 0.796208532  | 3.551898253 | 0.214927968  | 0.999967822 NA |
| ASV_16s_33060 | 0.061011694 | 0.218618375  | 3.551959366 | 0.282979651  | 0.99991792 NA  |
| ASV_16s_33061 | 0.045228556 | 0.734530899  | 3.551957139 | 0.187479457  | 0.99997984 NA  |
| ASV_16s_33062 | 0.045228556 | 0.734530899  | 3.551957139 | 0.187479457  | 0.99997984 NA  |
| ASV_16s_33063 | 0.045228556 | 0.734530899  | 3.551957139 | 0.187479457  | 0.99997984 NA  |
| ASV_16s_33064 | 0.045228556 | 0.734530899  | 3.551957139 | 0.187479457  | 0.99997984 NA  |
| ASV_16s_33065 | 0.045228556 | 0.734530899  | 3.551957139 | 0.187479457  | 0.99997984 NA  |

|               |             |             |             |             |             |    |
|---------------|-------------|-------------|-------------|-------------|-------------|----|
| ASV_16s_33066 | 0.045228556 | 0.734530899 | 3.551957139 | 0.187479457 | 0.99997984  | NA |
| ASV_16s_33067 | 0.045228556 | 0.734530899 | 3.551957139 | 0.187479457 | 0.99997984  | NA |
| ASV_16s_33068 | 0.050892322 | 0.766029632 | 3.551927318 | 0.200011736 | 0.999974839 | NA |
| ASV_16s_33069 | 0.050892322 | 0.766029632 | 3.551927318 | 0.200011736 | 0.999974839 | NA |
| ASV_16s_33070 | 0.050892322 | 0.766029632 | 3.551927318 | 0.200011736 | 0.999974839 | NA |
| ASV_16s_33071 | 0.050892322 | 0.766029632 | 3.551927318 | 0.200011736 | 0.999974839 | NA |
| ASV_16s_33072 | 0.050892322 | 0.766029632 | 3.551927318 | 0.200011736 | 0.999974839 | NA |
| ASV_16s_33073 | 0.072616422 | 0.778590672 | 3.55191577  | 0.263242595 | 0.999935782 | NA |
| ASV_16s_33074 | 0.046693641 | 0.742947842 | 3.551949024 | 0.190525813 | 0.999978695 | NA |
| ASV_16s_33075 | 0.046693641 | 0.742947842 | 3.551949024 | 0.190525813 | 0.999978695 | NA |
| ASV_16s_33076 | 0.046693641 | 0.742947842 | 3.551949024 | 0.190525813 | 0.999978695 | NA |
| ASV_16s_33077 | 0.046693641 | 0.742947842 | 3.551949024 | 0.190525813 | 0.999978695 | NA |
| ASV_16s_33078 | 0.046693641 | 0.742947842 | 3.551949024 | 0.190525813 | 0.999978695 | NA |
| ASV_16s_33079 | 0.046693641 | 0.742947842 | 3.551949024 | 0.190525813 | 0.999978695 | NA |
| ASV_16s_33080 | 0.046693641 | 0.742947842 | 3.551949024 | 0.190525813 | 0.999978695 | NA |
| ASV_16s_33081 | 0.046693641 | 0.742947842 | 3.551949024 | 0.190525813 | 0.999978695 | NA |
| ASV_16s_33082 | 0.046693641 | 0.742947842 | 3.551949024 | 0.190525813 | 0.999978695 | NA |
| ASV_16s_33083 | 0.046693641 | 0.742947842 | 3.551949024 | 0.190525813 | 0.999978695 | NA |
| ASV_16s_33084 | 0.073782813 | 0.803354574 | 3.551890209 | 0.267711807 | 0.999932002 | NA |
| ASV_16s_33085 | 0.073782813 | 0.803354574 | 3.551890209 | 0.267711807 | 0.999932002 | NA |
| ASV_16s_33086 | 0.073782813 | 0.803354574 | 3.551890209 | 0.267711807 | 0.999932002 | NA |
| ASV_16s_33087 | 0.057692699 | 0.810239334 | 3.551875482 | 0.111977891 | 0.999996582 | NA |
| ASV_16s_33088 | 0.04426878  | 0.32438105  | 3.552038494 | 0.19692668  | 0.999976143 | NA |
| ASV_16s_33089 | 0.04426878  | 0.32438105  | 3.552038494 | 0.19692668  | 0.999976143 | NA |
| ASV_16s_33090 | 0.04426878  | 0.32438105  | 3.552038494 | 0.19692668  | 0.999976143 | NA |
| ASV_16s_33091 | 0.04426878  | 0.32438105  | 3.552038494 | 0.19692668  | 0.999976143 | NA |
| ASV_16s_33092 | 0.04426878  | 0.32438105  | 3.552038494 | 0.19692668  | 0.999976143 | NA |
| ASV_16s_33093 | 0.04426878  | 0.32438105  | 3.552038494 | 0.19692668  | 0.999976143 | NA |
| ASV_16s_33094 | 0.04426878  | 0.32438105  | 3.552038494 | 0.19692668  | 0.999976143 | NA |
| ASV_16s_33095 | 0.04426878  | 0.32438105  | 3.552038494 | 0.19692668  | 0.999976143 | NA |
| ASV_16s_33096 | 0.04426878  | 0.32438105  | 3.552038494 | 0.19692668  | 0.999976143 | NA |
| ASV_16s_33097 | 0.04426878  | 0.32438105  | 3.552038494 | 0.19692668  | 0.999976143 | NA |
| ASV_16s_33098 | 0.04426878  | 0.32438105  | 3.552038494 | 0.19692668  | 0.999976143 | NA |
| ASV_16s_33099 | 0.053592758 | 0.324853165 | 3.552040715 | 0.226055849 | 0.999961769 | NA |
| ASV_16s_33100 | 0.053592758 | 0.324853165 | 3.552040715 | 0.226055849 | 0.999961769 | NA |
| ASV_16s_33101 | 0.053592758 | 0.324853165 | 3.552040715 | 0.226055849 | 0.999961769 | NA |
| ASV_16s_33102 | 0.053592758 | 0.324853165 | 3.552040715 | 0.226055849 | 0.999961769 | NA |
| ASV_16s_33103 | 0.053592758 | 0.324853165 | 3.552040715 | 0.226055849 | 0.999961769 | NA |
| ASV_16s_33104 | 0.053592758 | 0.324853165 | 3.552040715 | 0.226055849 | 0.999961769 | NA |
| ASV_16s_33105 | 0.053592758 | 0.324853165 | 3.552040715 | 0.226055849 | 0.999961769 | NA |
| ASV_16s_33106 | 0.059275888 | 0.324853165 | 3.552040715 | 0.246085769 | 0.999948938 | NA |
| ASV_16s_33107 | 0.059275888 | 0.324853165 | 3.552040715 | 0.246085769 | 0.999948938 | NA |
| ASV_16s_33108 | 0.059275888 | 0.324853165 | 3.552040715 | 0.246085769 | 0.999948938 | NA |
| ASV_16s_33109 | 0.059275888 | 0.324853165 | 3.552040715 | 0.246085769 | 0.999948938 | NA |
| ASV_16s_33110 | 0.059275888 | 0.324853165 | 3.552040715 | 0.246085769 | 0.999948938 | NA |
| ASV_16s_33111 | 0.059275888 | 0.324853165 | 3.552040715 | 0.246085769 | 0.999948938 | NA |
| ASV_16s_33112 | 0.058362542 | 0.328917333 | 3.552016942 | 0.12026464  | 0.999995625 | NA |
| ASV_16s_33113 | 0.077646856 | 0.324853165 | 3.552040715 | 0.310377428 | 0.999887769 | NA |
| ASV_16s_33114 | 0.077646856 | 0.324853165 | 3.552040715 | 0.310377428 | 0.999887769 | NA |
| ASV_16s_33115 | 0.077646856 | 0.324853165 | 3.552040715 | 0.310377428 | 0.999887769 | NA |
| ASV_16s_33116 | 0.077646856 | 0.324853165 | 3.552040715 | 0.310377428 | 0.999887769 | NA |
| ASV_16s_33117 | 0.077646856 | 0.324853165 | 3.552040715 | 0.310377428 | 0.999887769 | NA |
| ASV_16s_33118 | 0.077646856 | 0.324853165 | 3.552040715 | 0.310377428 | 0.999887769 | NA |
| ASV_16s_33119 | 0.077646856 | 0.324853165 | 3.552040715 | 0.310377428 | 0.999887769 | NA |
| ASV_16s_33120 | 0.034305661 | 0.323452031 | 3.552034169 | 0.174679208 | 0.999984182 | NA |
| ASV_16s_33121 | 0.034305661 | 0.323452031 | 3.552034169 | 0.174679208 | 0.999984182 | NA |
| ASV_16s_33122 | 0.04645063  | 0.324570461 | 3.552039383 | 0.202876682 | 0.999973584 | NA |
| ASV_16s_33123 | 0.04645063  | 0.324570461 | 3.552039383 | 0.202876682 | 0.999973584 | NA |
| ASV_16s_33124 | 0.06235225  | 0.324853165 | 3.552040715 | 0.256900329 | 0.999940891 | NA |
| ASV_16s_33125 | 0.06235225  | 0.324853165 | 3.552040715 | 0.256900329 | 0.999940891 | NA |
| ASV_16s_33126 | 0.080542669 | 0.324853165 | 3.552040715 | 0.320448688 | 0.999874985 | NA |
| ASV_16s_33127 | 0.080542669 | 0.324853165 | 3.552040715 | 0.320448688 | 0.999874985 | NA |
| ASV_16s_33128 | 0.080542669 | 0.324853165 | 3.552040715 | 0.320448688 | 0.999874985 | NA |
| ASV_16s_33129 | 0.079118218 | 0.324853165 | 3.552040715 | 0.315496766 | 0.999881391 | NA |
| ASV_16s_33130 | 0.079118218 | 0.324853165 | 3.552040715 | 0.315496766 | 0.999881391 | NA |
| ASV_16s_33131 | 0.079118218 | 0.324853165 | 3.552040715 | 0.315496766 | 0.999881391 | NA |
| ASV_16s_33132 | 0.055221031 | 0.324853165 | 3.552040715 | 0.23180148  | 0.999958351 | NA |

|               |             |              |             |             |             |    |
|---------------|-------------|--------------|-------------|-------------|-------------|----|
| ASV_16s_33133 | 0.065478477 | 0.324853165  | 3.552040715 | 0.267870153 | 0.999931865 | NA |
| ASV_16s_33134 | 0.059713962 | -0.156435634 | 3.551905759 | 0.252095014 | 0.999944568 | NA |
| ASV_16s_33135 | 0.059713962 | -0.156435634 | 3.551905759 | 0.252095014 | 0.999944568 | NA |
| ASV_16s_33136 | 0.059713962 | -0.156435634 | 3.551905759 | 0.252095014 | 0.999944568 | NA |
| ASV_16s_33137 | 0.062691934 | -0.149392675 | 3.551914758 | 0.114107189 | 0.999996352 | NA |
| ASV_16s_33138 | 0.059560464 | -0.156435643 | 3.551905759 | 0.251575253 | 0.999944956 | NA |
| ASV_16s_33139 | 0.057400182 | -0.156435634 | 3.551905759 | 0.244384482 | 0.99995013  | NA |
| ASV_16s_33140 | 0.057400182 | -0.156435634 | 3.551905759 | 0.244384482 | 0.99995013  | NA |
| ASV_16s_33141 | 0.057400182 | -0.156435634 | 3.551905759 | 0.244384482 | 0.99995013  | NA |
| ASV_16s_33142 | 0.052552267 | -0.156435639 | 3.551905759 | 0.228177295 | 0.999960531 | NA |
| ASV_16s_33143 | 0.068555291 | -0.156435635 | 3.551905759 | 0.28145742  | 0.999919407 | NA |
| ASV_16s_33144 | 0.068555291 | -0.156435635 | 3.551905759 | 0.28145742  | 0.999919407 | NA |
| ASV_16s_33145 | 0.068555291 | -0.156435635 | 3.551905759 | 0.28145742  | 0.999919407 | NA |
| ASV_16s_33146 | 0.068555291 | -0.156435635 | 3.551905759 | 0.28145742  | 0.999919407 | NA |
| ASV_16s_33147 | 0.095791067 | -0.156435635 | 3.551905759 | 0.370916416 | 0.999795445 | NA |
| ASV_16s_33148 | 0.095791067 | -0.156435635 | 3.551905759 | 0.370916416 | 0.999795445 | NA |
| ASV_16s_33149 | 0.049320324 | -0.156435634 | 3.551905759 | 0.217372505 | 0.999966555 | NA |
| ASV_16s_33150 | 0.049320324 | -0.156435634 | 3.551905759 | 0.217372505 | 0.999966555 | NA |
| ASV_16s_33151 | 0.049320324 | -0.156435634 | 3.551905759 | 0.217372505 | 0.999966555 | NA |
| ASV_16s_33152 | 0.049320324 | -0.156435634 | 3.551905759 | 0.217372505 | 0.999966555 | NA |
| ASV_16s_33153 | 0.034261448 | -0.083114194 | 3.551936801 | 0.178824111 | 0.999982857 | NA |
| ASV_16s_33154 | 0.034261448 | -0.083114194 | 3.551936801 | 0.178824111 | 0.999982857 | NA |
| ASV_16s_33155 | 0.034261448 | -0.083114194 | 3.551936801 | 0.178824111 | 0.999982857 | NA |
| ASV_16s_33156 | 0.034261448 | -0.083114194 | 3.551936801 | 0.178824111 | 0.999982857 | NA |
| ASV_16s_33157 | 0.034261448 | -0.083114194 | 3.551936801 | 0.178824111 | 0.999982857 | NA |
| ASV_16s_33158 | 0.050401752 | -0.156435634 | 3.551905759 | 0.220995658 | 0.999964612 | NA |
| ASV_16s_33159 | 0.050401752 | -0.156435634 | 3.551905759 | 0.220995658 | 0.999964612 | NA |
| ASV_16s_33160 | 0.04484606  | -0.15066071  | 3.551909326 | 0.202951898 | 0.99997355  | NA |
| ASV_16s_33161 | 0.04484606  | -0.15066071  | 3.551909326 | 0.202951898 | 0.99997355  | NA |
| ASV_16s_33162 | 0.04484606  | -0.15066071  | 3.551909326 | 0.202951898 | 0.99997355  | NA |
| ASV_16s_33163 | 0.04484606  | -0.15066071  | 3.551909326 | 0.202951898 | 0.99997355  | NA |
| ASV_16s_33164 | 0.055528269 | 0.810239334  | 3.551875482 | 0.109449065 | 0.999996841 | NA |
| ASV_16s_33165 | 0.061791726 | 0.803354574  | 3.551890209 | 0.230080746 | 0.999959396 | NA |
| ASV_16s_33166 | 0.061791726 | 0.803354574  | 3.551890209 | 0.230080746 | 0.999959396 | NA |
| ASV_16s_33167 | 0.061791726 | 0.803354574  | 3.551890209 | 0.230080746 | 0.999959396 | NA |
| ASV_16s_33168 | 0.061791726 | 0.803354574  | 3.551890209 | 0.230080746 | 0.999959396 | NA |
| ASV_16s_33169 | 0.061791726 | 0.803354574  | 3.551890209 | 0.230080746 | 0.999959396 | NA |
| ASV_16s_33170 | 0.061791726 | 0.803354574  | 3.551890209 | 0.230080746 | 0.999959396 | NA |
| ASV_16s_33171 | 0.061791726 | 0.803354574  | 3.551890209 | 0.230080746 | 0.999959396 | NA |
| ASV_16s_33172 | 0.061791726 | 0.803354574  | 3.551890209 | 0.230080746 | 0.999959396 | NA |
| ASV_16s_33173 | 0.067597954 | 0.803354574  | 3.551890209 | 0.248330922 | 0.999947335 | NA |
| ASV_16s_33174 | 0.067597954 | 0.803354574  | 3.551890209 | 0.248330922 | 0.999947335 | NA |
| ASV_16s_33175 | 0.067597954 | 0.803354574  | 3.551890209 | 0.248330922 | 0.999947335 | NA |
| ASV_16s_33176 | 0.067597954 | 0.803354574  | 3.551890209 | 0.248330922 | 0.999947335 | NA |
| ASV_16s_33177 | 0.05415714  | 0.814196172  | 3.551849423 | 0.116586301 | 0.99999607  | NA |
| ASV_16s_33178 | 0.050796936 | 0.821156969  | 3.551765761 | 0.149668055 | 0.9999907   | NA |
| ASV_16s_33179 | 0.050796936 | 0.821156969  | 3.551765761 | 0.149668055 | 0.9999907   | NA |
| ASV_16s_33180 | 0.050796936 | 0.821156969  | 3.551765761 | 0.149668055 | 0.9999907   | NA |
| ASV_16s_33181 | 0.050796936 | 0.821156969  | 3.551765761 | 0.149668055 | 0.9999907   | NA |
| ASV_16s_33182 | 0.050796936 | 0.821156969  | 3.551765761 | 0.149668055 | 0.9999907   | NA |
| ASV_16s_33183 | 0.026511107 | 0.666987634  | 3.551892873 | 0.106797288 | 0.999997098 | NA |
| ASV_16s_33184 | 0.026511107 | 0.666987634  | 3.551892873 | 0.106797288 | 0.999997098 | NA |
| ASV_16s_33185 | 0.026511107 | 0.666987634  | 3.551892873 | 0.106797288 | 0.999997098 | NA |
| ASV_16s_33186 | 0.045449377 | 0.792845728  | 3.551794974 | 0.139166029 | 0.999992762 | NA |
| ASV_16s_33187 | 0.045449377 | 0.792845728  | 3.551794974 | 0.139166029 | 0.999992762 | NA |
| ASV_16s_33188 | 0.045449377 | 0.792845728  | 3.551794974 | 0.139166029 | 0.999992762 | NA |
| ASV_16s_33189 | 0.045449377 | 0.792845728  | 3.551794974 | 0.139166029 | 0.999992762 | NA |
| ASV_16s_33190 | 0.045449377 | 0.792845728  | 3.551794974 | 0.139166029 | 0.999992762 | NA |
| ASV_16s_33191 | 0.045449377 | 0.792845728  | 3.551794974 | 0.139166029 | 0.999992762 | NA |
| ASV_16s_33192 | 0.045449377 | 0.792845728  | 3.551794974 | 0.139166029 | 0.999992762 | NA |
| ASV_16s_33193 | 0.045449377 | 0.792845728  | 3.551794974 | 0.139166029 | 0.999992762 | NA |
| ASV_16s_33194 | 0.062641477 | 0.822154672  | 3.551764476 | 0.18106518  | 0.999982108 | NA |
| ASV_16s_33195 | 0.062641477 | 0.822154672  | 3.551764476 | 0.18106518  | 0.999982108 | NA |
| ASV_16s_33196 | 0.062641477 | 0.822154672  | 3.551764476 | 0.18106518  | 0.999982108 | NA |
| ASV_16s_33197 | 0.053312657 | 0.340195649  | 3.55190383  | 0.17384173  | 0.999984441 | NA |
| ASV_16s_33198 | 0.053312657 | 0.340195649  | 3.55190383  | 0.17384173  | 0.999984441 | NA |
| ASV_16s_33199 | 0.053312657 | 0.340195649  | 3.55190383  | 0.17384173  | 0.999984441 | NA |







|               |             |              |             |             |             |    |
|---------------|-------------|--------------|-------------|-------------|-------------|----|
| ASV_16s_33401 | 0.051105372 | 0.317434408  | 3.551783418 | 0.299446345 | 0.999900586 | NA |
| ASV_16s_33402 | 0.051105372 | 0.317434408  | 3.551783418 | 0.299446345 | 0.999900586 | NA |
| ASV_16s_33403 | 0.051105372 | 0.317434408  | 3.551783418 | 0.299446345 | 0.999900586 | NA |
| ASV_16s_33404 | 0.051105372 | 0.317434408  | 3.551783418 | 0.299446345 | 0.999900586 | NA |
| ASV_16s_33405 | 0.051105372 | 0.317434408  | 3.551783418 | 0.299446345 | 0.999900586 | NA |
| ASV_16s_33406 | 0.051105372 | 0.317434408  | 3.551783418 | 0.299446345 | 0.999900586 | NA |
| ASV_16s_33407 | 0.051105372 | 0.317434408  | 3.551783418 | 0.299446345 | 0.999900586 | NA |
| ASV_16s_33408 | 0.051105372 | 0.317434408  | 3.551783418 | 0.299446345 | 0.999900586 | NA |
| ASV_16s_33409 | 0.051105372 | 0.317434408  | 3.551783418 | 0.299446345 | 0.999900586 | NA |
| ASV_16s_33410 | 0.051105372 | 0.317434408  | 3.551783418 | 0.299446345 | 0.999900586 | NA |
| ASV_16s_33411 | 0.031643182 | 0.593020521  | 3.551322343 | 0.073415272 | 0.999999208 | NA |
| ASV_16s_33412 | 0.031643182 | 0.593020521  | 3.551322343 | 0.073415272 | 0.999999208 | NA |
| ASV_16s_33413 | 0.045853605 | 0.659913029  | 3.551816004 | 0.251896022 | 0.999944717 | NA |
| ASV_16s_33414 | 0.045853605 | 0.659913029  | 3.551816004 | 0.251896022 | 0.999944717 | NA |
| ASV_16s_33415 | 0.053469714 | 0.678866972  | 3.551735687 | 0.281069674 | 0.999919783 | NA |
| ASV_16s_33416 | 0.053469714 | 0.678866972  | 3.551735687 | 0.281069674 | 0.999919783 | NA |
| ASV_16s_33417 | 0.069923312 | -0.15591274  | 3.551913566 | 0.213570902 | 0.999968511 | NA |
| ASV_16s_33418 | 0.057390031 | 0.482545063  | 3.551926041 | 0.195145129 | 0.999976874 | NA |
| ASV_16s_33419 | 0.048231419 | 0.175945578  | 3.551939442 | 0.204123547 | 0.999973024 | NA |
| ASV_16s_33420 | 0.066913135 | 0.127467324  | 3.551924953 | 0.151311235 | 0.999990344 | NA |
| ASV_16s_33421 | 0.061955942 | 0.775528981  | 3.551949177 | 0.203798813 | 0.999973171 | NA |
| ASV_16s_33422 | 0.053697618 | 0.394372519  | 3.551875979 | 0.264657201 | 0.999934602 | NA |
| ASV_16s_33423 | 0.045392355 | 0.145469579  | 3.551921444 | 0.241887261 | 0.999951845 | NA |
| ASV_16s_33424 | 0.050442642 | 0.3733039    | 3.551937975 | 0.228282985 | 0.999960469 | NA |
| ASV_16s_33425 | 0.03537211  | 0.377686899  | 3.551913688 | 0.175774647 | 0.999983839 | NA |
| ASV_16s_33426 | 0.058013221 | 0.46123858   | 3.551852502 | 0.285221553 | 0.999915694 | NA |
| ASV_16s_33427 | 0.060729637 | 0.512264279  | 3.551944822 | 0.202606277 | 0.999973704 | NA |
| ASV_16s_33428 | 0.055431519 | 0.759907736  | 3.551913667 | 0.210711525 | 0.999969929 | NA |
| ASV_16s_33429 | 0.100157966 | 0.774134364  | 3.551897969 | 0.349842917 | 0.999831953 | NA |
| ASV_16s_33430 | 0.061791726 | 0.308537873  | 3.551974668 | 0.254628092 | 0.999942651 | NA |
| ASV_16s_33431 | 0.075395393 | -0.181111928 | 3.551812601 | 0.313669342 | 0.999883696 | NA |
| ASV_16s_33432 | 0.075395393 | -0.181111928 | 3.551812601 | 0.313669342 | 0.999883696 | NA |
| ASV_16s_33433 | 0.074756604 | 0.774134364  | 3.551897969 | 0.27025341  | 0.999929785 | NA |
| ASV_16s_33434 | 0.074756604 | 0.774134364  | 3.551897969 | 0.27025341  | 0.999929785 | NA |
| ASV_16s_33435 | 0.074756604 | 0.774134364  | 3.551897969 | 0.27025341  | 0.999929785 | NA |
| ASV_16s_33436 | 0.074756604 | 0.774134364  | 3.551897969 | 0.27025341  | 0.999929785 | NA |
| ASV_16s_33437 | 0.074364743 | 0.793005499  | 3.551874704 | 0.250246342 | 0.999945939 | NA |
| ASV_16s_33438 | 0.052435877 | 0.746174038  | 3.551929189 | 0.203243368 | 0.99997342  | NA |
| ASV_16s_33439 | 0.066913135 | 0.774134364  | 3.551897969 | 0.245469684 | 0.999949372 | NA |
| ASV_16s_33440 | 0.066913135 | 0.774134364  | 3.551897969 | 0.245469684 | 0.999949372 | NA |
| ASV_16s_33441 | 0.066913135 | 0.774134364  | 3.551897969 | 0.245469684 | 0.999949372 | NA |
| ASV_16s_33442 | 0.05172661  | 0.712018886  | 3.551817117 | 0.189012756 | 0.99997927  | NA |
| ASV_16s_33443 | 0.05172661  | 0.712018886  | 3.551817117 | 0.189012756 | 0.99997927  | NA |
| ASV_16s_33444 | 0.05172661  | 0.712018886  | 3.551817117 | 0.189012756 | 0.99997927  | NA |
| ASV_16s_33445 | 0.099783757 | 0.769783117  | 3.551746066 | 0.347086742 | 0.999836367 | NA |
| ASV_16s_33446 | 0.099783757 | 0.769783117  | 3.551746066 | 0.347086742 | 0.999836367 | NA |
| ASV_16s_33447 | 0.05051544  | 0.70700939   | 3.551823675 | 0.186324723 | 0.999980263 | NA |
| ASV_16s_33448 | 0.05051544  | 0.70700939   | 3.551823675 | 0.186324723 | 0.999980263 | NA |
| ASV_16s_33449 | 0.05051544  | 0.70700939   | 3.551823675 | 0.186324723 | 0.999980263 | NA |
| ASV_16s_33450 | 0.08021955  | 0.288843453  | 3.551869236 | 0.333250017 | 0.999857323 | NA |
| ASV_16s_33451 | 0.024528006 | 0.301534349  | 3.551957875 | 0.149697913 | 0.999990694 | NA |
| ASV_16s_33452 | 0.024528006 | 0.301534349  | 3.551957875 | 0.149697913 | 0.999990694 | NA |
| ASV_16s_33453 | 0.034016622 | 0.298325082  | 3.55194618  | 0.170816099 | 0.999985351 | NA |
| ASV_16s_33454 | 0.034016622 | 0.298325082  | 3.55194618  | 0.170816099 | 0.999985351 | NA |
| ASV_16s_33455 | 0.020200214 | 0.303527722  | 3.551962931 | 0.127018233 | 0.999994717 | NA |
| ASV_16s_33456 | 0.072207286 | 0.288843453  | 3.551869236 | 0.297662903 | 0.999902576 | NA |
| ASV_16s_33457 | 0.056975516 | 0.29189698   | 3.551892091 | 0.235555012 | 0.999956007 | NA |
| ASV_16s_33458 | 0.066913135 | -0.199203868 | 3.551741642 | 0.277962333 | 0.999922752 | NA |
| ASV_16s_33459 | 0.066913135 | -0.199203868 | 3.551741642 | 0.277962333 | 0.999922752 | NA |
| ASV_16s_33460 | 0.066913135 | -0.199203868 | 3.551741642 | 0.277962333 | 0.999922752 | NA |
| ASV_16s_33461 | 0.080594414 | -0.199203868 | 3.551741642 | 0.334488294 | 0.999855528 | NA |
| ASV_16s_33462 | 0.117287882 | -0.199203868 | 3.551741642 | 0.483940873 | 0.999503185 | NA |
| ASV_16s_33463 | 0.012346816 | 0.112531794  | 3.551942004 | 0.089992659 | 0.999998396 | NA |
| ASV_16s_33464 | 0.114386666 | 0.769783117  | 3.551746066 | 0.398851928 | 0.999739083 | NA |
| ASV_16s_33465 | 0.104002483 | 0.769783117  | 3.551746066 | 0.362078924 | 0.999811359 | NA |
| ASV_16s_33466 | 0.104002483 | 0.769783117  | 3.551746066 | 0.362078924 | 0.999811359 | NA |
| ASV_16s_33467 | 0.040099556 | 0.658400238  | 3.551881915 | 0.167268874 | 0.99998637  | NA |



|               |             |              |             |             |             |    |
|---------------|-------------|--------------|-------------|-------------|-------------|----|
| ASV_16s_33468 | 0.040099556 | 0.658400238  | 3.551881915 | 0.167268874 | 0.99998637  | NA |
| ASV_16s_33469 | 0.077311604 | -0.156435635 | 3.551905759 | 0.310381002 | 0.999887765 | NA |
| ASV_16s_33470 | 0.092162354 | -0.156435635 | 3.551905759 | 0.359083113 | 0.999816554 | NA |
| ASV_16s_33471 | 0.092162354 | -0.156435635 | 3.551905759 | 0.359083113 | 0.999816554 | NA |
| ASV_16s_33472 | 0.092162354 | -0.156435635 | 3.551905759 | 0.359083113 | 0.999816554 | NA |
| ASV_16s_33473 | 0.092162354 | -0.156435635 | 3.551905759 | 0.359083113 | 0.999816554 | NA |
| ASV_16s_33474 | 0.092162354 | -0.156435635 | 3.551905759 | 0.359083113 | 0.999816554 | NA |
| ASV_16s_33475 | 0.092162354 | -0.156435635 | 3.551905759 | 0.359083113 | 0.999816554 | NA |
| ASV_16s_33476 | 0.092162354 | -0.156435635 | 3.551905759 | 0.359083113 | 0.999816554 | NA |
| ASV_16s_33477 | 0.092162354 | -0.156435635 | 3.551905759 | 0.359083113 | 0.999816554 | NA |
| ASV_16s_33478 | 0.092162354 | -0.156435635 | 3.551905759 | 0.359083113 | 0.999816554 | NA |
| ASV_16s_33479 | 0.092162354 | -0.156435635 | 3.551905759 | 0.359083113 | 0.999816554 | NA |
| ASV_16s_33480 | 0.092162354 | -0.156435635 | 3.551905759 | 0.359083113 | 0.999816554 | NA |
| ASV_16s_33481 | 0.092162354 | -0.156435635 | 3.551905759 | 0.359083113 | 0.999816554 | NA |
| ASV_16s_33482 | 0.092162354 | -0.156435635 | 3.551905759 | 0.359083113 | 0.999816554 | NA |
| ASV_16s_33483 | 0.092162354 | -0.156435635 | 3.551905759 | 0.359083113 | 0.999816554 | NA |
| ASV_16s_33484 | 0.092162354 | -0.156435635 | 3.551905759 | 0.359083113 | 0.999816554 | NA |
| ASV_16s_33485 | 0.092162354 | -0.156435635 | 3.551905759 | 0.359083113 | 0.999816554 | NA |
| ASV_16s_33486 | 0.092162354 | -0.156435635 | 3.551905759 | 0.359083113 | 0.999816554 | NA |
| ASV_16s_33487 | 0.083292641 | 0.137351133  | 3.551932586 | 0.293964985 | 0.999906613 | NA |
| ASV_16s_33488 | 0.084635608 | 0.50971678   | 3.551792737 | 0.304854945 | 0.999894379 | NA |
| ASV_16s_33489 | 0.053592758 | -0.157111656 | 3.551682034 | 0.173061207 | 0.99998468  | NA |
| ASV_16s_33490 | 0.059424239 | 0.822154672  | 3.551764476 | 0.172529373 | 0.999984841 | NA |
| ASV_16s_33491 | 0.059424239 | 0.822154672  | 3.551764476 | 0.172529373 | 0.999984841 | NA |
| ASV_16s_33492 | 0.059424239 | 0.822154672  | 3.551764476 | 0.172529373 | 0.999984841 | NA |
| ASV_16s_33493 | 0.059424239 | 0.822154672  | 3.551764476 | 0.172529373 | 0.999984841 | NA |
| ASV_16s_33494 | 0.059424239 | 0.822154672  | 3.551764476 | 0.172529373 | 0.999984841 | NA |
| ASV_16s_33495 | 0.059424239 | 0.822154672  | 3.551764476 | 0.172529373 | 0.999984841 | NA |
| ASV_16s_33496 | 0.059424239 | 0.822154672  | 3.551764476 | 0.172529373 | 0.999984841 | NA |
| ASV_16s_33497 | 0.059424239 | 0.822154672  | 3.551764476 | 0.172529373 | 0.999984841 | NA |
| ASV_16s_33498 | 0.059424239 | 0.822154672  | 3.551764476 | 0.172529373 | 0.999984841 | NA |
| ASV_16s_33499 | 0.059424239 | 0.822154672  | 3.551764476 | 0.172529373 | 0.999984841 | NA |
| ASV_16s_33500 | 0.033861868 | -0.019905305 | 3.551802464 | 0.236256855 | 0.999955558 | NA |
| ASV_16s_33501 | 0.033861868 | -0.019905305 | 3.551802464 | 0.236256855 | 0.999955558 | NA |
| ASV_16s_33502 | 0.033861868 | -0.019905305 | 3.551802464 | 0.236256855 | 0.999955558 | NA |
| ASV_16s_33503 | 0.033861868 | -0.019905305 | 3.551802464 | 0.236256855 | 0.999955558 | NA |
| ASV_16s_33504 | 0.033861868 | -0.019905305 | 3.551802464 | 0.236256855 | 0.999955558 | NA |
| ASV_16s_33505 | 0.105332917 | -0.024441628 | 3.551283415 | 0.679718274 | 0.998486765 | NA |
| ASV_16s_33506 | 0.105332917 | -0.024441628 | 3.551283415 | 0.679718274 | 0.998486765 | NA |
| ASV_16s_33507 | 0.105332917 | -0.024441628 | 3.551283415 | 0.679718274 | 0.998486765 | NA |
| ASV_16s_33508 | 0.075441681 | 0.243059014  | 3.551762226 | 0.489284038 | 0.999484781 | NA |
| ASV_16s_33509 | 0.093705032 | -0.021507699 | 3.55137063  | 0.608088136 | 0.998946647 | NA |
| ASV_16s_33510 | 0.093705032 | -0.021507699 | 3.55137063  | 0.608088136 | 0.998946647 | NA |
| ASV_16s_33511 | 0.093705032 | -0.021507699 | 3.55137063  | 0.608088136 | 0.998946647 | NA |
| ASV_16s_33512 | 0.093705032 | -0.021507699 | 3.55137063  | 0.608088136 | 0.998946647 | NA |
| ASV_16s_33513 | 0.093705032 | -0.021507699 | 3.55137063  | 0.608088136 | 0.998946647 | NA |
| ASV_16s_33514 | 0.093705032 | -0.021507699 | 3.55137063  | 0.608088136 | 0.998946647 | NA |
| ASV_16s_33515 | 0.093705032 | -0.021507699 | 3.55137063  | 0.608088136 | 0.998946647 | NA |
| ASV_16s_33516 | 0.093705032 | -0.021507699 | 3.55137063  | 0.608088136 | 0.998946647 | NA |
| ASV_16s_33517 | 0.093705032 | -0.021507699 | 3.55137063  | 0.608088136 | 0.998946647 | NA |
| ASV_16s_33518 | 0.074351784 | 0.563885437  | 3.551665893 | 0.36083587  | 0.999813527 | NA |
| ASV_16s_33519 | 0.093705032 | -0.021507699 | 3.55137063  | 0.608088136 | 0.998946647 | NA |
| ASV_16s_33520 | 0.093705032 | -0.021507699 | 3.55137063  | 0.608088136 | 0.998946647 | NA |
| ASV_16s_33521 | 0.093705032 | -0.021507699 | 3.55137063  | 0.608088136 | 0.998946647 | NA |
| ASV_16s_33522 | 0.093705032 | -0.021507699 | 3.55137063  | 0.608088136 | 0.998946647 | NA |
| ASV_16s_33523 | 0.093705032 | -0.021507699 | 3.55137063  | 0.608088136 | 0.998946647 | NA |
| ASV_16s_33524 | 0.074745064 | -0.015814341 | 3.551562415 | 0.495750619 | 0.999461893 | NA |
| ASV_16s_33525 | 0.074745064 | -0.015814341 | 3.551562415 | 0.495750619 | 0.999461893 | NA |
| ASV_16s_33526 | 0.074745064 | -0.015814341 | 3.551562415 | 0.495750619 | 0.999461893 | NA |
| ASV_16s_33527 | 0.074745064 | -0.015814341 | 3.551562415 | 0.495750619 | 0.999461893 | NA |
| ASV_16s_33528 | 0.074745064 | -0.015814341 | 3.551562415 | 0.495750619 | 0.999461893 | NA |
| ASV_16s_33529 | 0.074745064 | -0.015814341 | 3.551562415 | 0.495750619 | 0.999461893 | NA |
| ASV_16s_33530 | 0.074745064 | -0.015814341 | 3.551562415 | 0.495750619 | 0.999461893 | NA |
| ASV_16s_33531 | 0.074745064 | -0.015814341 | 3.551562415 | 0.495750619 | 0.999461893 | NA |
| ASV_16s_33532 | 0.074745064 | -0.015814341 | 3.551562415 | 0.495750619 | 0.999461893 | NA |
| ASV_16s_33533 | 0.074745064 | -0.015814341 | 3.551562415 | 0.495750619 | 0.999461893 | NA |
| ASV_16s_33534 | 0.074745064 | -0.015814341 | 3.551562415 | 0.495750619 | 0.999461893 | NA |





|               |             |             |             |             |                |
|---------------|-------------|-------------|-------------|-------------|----------------|
| ASV_16s_33669 | 0.045304261 | 0.338832469 | 3.551900717 | 0.327192908 | 0.999865882 NA |
| ASV_16s_33670 | 0.045304261 | 0.338832469 | 3.551900717 | 0.327192908 | 0.999865882 NA |
| ASV_16s_33671 | 0.045304261 | 0.338832469 | 3.551900717 | 0.327192908 | 0.999865882 NA |
| ASV_16s_33672 | 0.045304261 | 0.338832469 | 3.551900717 | 0.327192908 | 0.999865882 NA |
| ASV_16s_33673 | 0.045304261 | 0.338832469 | 3.551900717 | 0.327192908 | 0.999865882 NA |
| ASV_16s_33674 | 0.045304261 | 0.338832469 | 3.551900717 | 0.327192908 | 0.999865882 NA |
| ASV_16s_33675 | 0.045304261 | 0.338832469 | 3.551900717 | 0.327192908 | 0.999865882 NA |
| ASV_16s_33676 | 0.045304261 | 0.338832469 | 3.551900717 | 0.327192908 | 0.999865882 NA |
| ASV_16s_33677 | 0.083027945 | 0.350444408 | 3.551692947 | 0.528487433 | 0.999335342 NA |
| ASV_16s_33678 | 0.083027945 | 0.350444408 | 3.551692947 | 0.528487433 | 0.999335342 NA |
| ASV_16s_33679 | 0.083027945 | 0.350444408 | 3.551692947 | 0.528487433 | 0.999335342 NA |
| ASV_16s_33680 | 0.058700485 | 0.314188597 | 3.551772228 | 0.359178458 | 0.99981639 NA  |
| ASV_16s_33681 | 0.058700485 | 0.314188597 | 3.551772228 | 0.359178458 | 0.99981639 NA  |
| ASV_16s_33682 | 0.058700485 | 0.314188597 | 3.551772228 | 0.359178458 | 0.99981639 NA  |
| ASV_16s_33683 | 0.058700485 | 0.314188597 | 3.551772228 | 0.359178458 | 0.99981639 NA  |
| ASV_16s_33684 | 0.058700485 | 0.314188597 | 3.551772228 | 0.359178458 | 0.99981639 NA  |
| ASV_16s_33685 | 0.058700485 | 0.314188597 | 3.551772228 | 0.359178458 | 0.99981639 NA  |
| ASV_16s_33686 | 0.058700485 | 0.314188597 | 3.551772228 | 0.359178458 | 0.99981639 NA  |
| ASV_16s_33687 | 0.058700485 | 0.314188597 | 3.551772228 | 0.359178458 | 0.99981639 NA  |
| ASV_16s_33688 | 0.058700485 | 0.314188597 | 3.551772228 | 0.359178458 | 0.99981639 NA  |
| ASV_16s_33689 | 0.058700485 | 0.314188597 | 3.551772228 | 0.359178458 | 0.99981639 NA  |
| ASV_16s_33690 | 0.058700485 | 0.314188597 | 3.551772228 | 0.359178458 | 0.99981639 NA  |
| ASV_16s_33691 | 0.058700485 | 0.314188597 | 3.551772228 | 0.359178458 | 0.99981639 NA  |
| ASV_16s_33692 | 0.058700485 | 0.314188597 | 3.551772228 | 0.359178458 | 0.99981639 NA  |
| ASV_16s_33693 | 0.058700485 | 0.314188597 | 3.551772228 | 0.359178458 | 0.99981639 NA  |
| ASV_16s_33694 | 0.058700485 | 0.314188597 | 3.551772228 | 0.359178458 | 0.99981639 NA  |
| ASV_16s_33695 | 0.058700485 | 0.314188597 | 3.551772228 | 0.359178458 | 0.99981639 NA  |
| ASV_16s_33696 | 0.058700485 | 0.314188597 | 3.551772228 | 0.359178458 | 0.99981639 NA  |
| ASV_16s_33697 | 0.058700485 | 0.314188597 | 3.551772228 | 0.359178458 | 0.99981639 NA  |
| ASV_16s_33698 | 0.058700485 | 0.314188597 | 3.551772228 | 0.359178458 | 0.99981639 NA  |
| ASV_16s_33699 | 0.058700485 | 0.314188597 | 3.551772228 | 0.359178458 | 0.99981639 NA  |
| ASV_16s_33700 | 0.058700485 | 0.314188597 | 3.551772228 | 0.359178458 | 0.99981639 NA  |
| ASV_16s_33701 | 0.053009525 | 0.314368905 | 3.551840065 | 0.33091811  | 0.999860661 NA |
| ASV_16s_33702 | 0.053924506 | 0.314101977 | 3.551830502 | 0.335398518 | 0.999854198 NA |
| ASV_16s_33703 | 0.05312851  | 0.314333251 | 3.551838782 | 0.331519982 | 0.999859805 NA |
| ASV_16s_33704 | 0.064342106 | 0.315941058 | 3.551692852 | 0.388060738 | 0.999761977 NA |
| ASV_16s_33705 | 0.058346366 | 0.548164945 | 3.551649092 | 0.379423743 | 0.999779274 NA |
| ASV_16s_33706 | 0.05074052  | 0.315046632 | 3.551864853 | 0.320073973 | 0.999875478 NA |
| ASV_16s_33707 | 0.05074052  | 0.315046632 | 3.551864853 | 0.320073973 | 0.999875478 NA |
| ASV_16s_33708 | 0.05074052  | 0.315046632 | 3.551864853 | 0.320073973 | 0.999875478 NA |
| ASV_16s_33709 | 0.05074052  | 0.315046632 | 3.551864853 | 0.320073973 | 0.999875478 NA |
| ASV_16s_33710 | 0.05074052  | 0.315046632 | 3.551864853 | 0.320073973 | 0.999875478 NA |
| ASV_16s_33711 | 0.05074052  | 0.315046632 | 3.551864853 | 0.320073973 | 0.999875478 NA |
| ASV_16s_33712 | 0.05074052  | 0.315046632 | 3.551864853 | 0.320073973 | 0.999875478 NA |
| ASV_16s_33713 | 0.05074052  | 0.315046632 | 3.551864853 | 0.320073973 | 0.999875478 NA |
| ASV_16s_33714 | 0.05074052  | 0.315046632 | 3.551864853 | 0.320073973 | 0.999875478 NA |
| ASV_16s_33715 | 0.05074052  | 0.315046632 | 3.551864853 | 0.320073973 | 0.999875478 NA |
| ASV_16s_33716 | 0.05074052  | 0.315046632 | 3.551864853 | 0.320073973 | 0.999875478 NA |
| ASV_16s_33717 | 0.05074052  | 0.315046632 | 3.551864853 | 0.320073973 | 0.999875478 NA |
| ASV_16s_33718 | 0.05074052  | 0.315046632 | 3.551864853 | 0.320073973 | 0.999875478 NA |
| ASV_16s_33719 | 0.05074052  | 0.315046632 | 3.551864853 | 0.320073973 | 0.999875478 NA |
| ASV_16s_33720 | 0.05074052  | 0.315046632 | 3.551864853 | 0.320073973 | 0.999875478 NA |
| ASV_16s_33721 | 0.05074052  | 0.315046632 | 3.551864853 | 0.320073973 | 0.999875478 NA |
| ASV_16s_33722 | 0.05074052  | 0.315046632 | 3.551864853 | 0.320073973 | 0.999875478 NA |
| ASV_16s_33723 | 0.049713933 | 0.315363233 | 3.551876695 | 0.315230416 | 0.999881728 NA |
| ASV_16s_33724 | 0.064757515 | 0.315941049 | 3.5516864   | 0.390170786 | 0.999757614 NA |
| ASV_16s_33725 | 0.049029542 | 0.315391563 | 3.551883331 | 0.31201681  | 0.999885753 NA |
| ASV_16s_33726 | 0.07877451  | 0.315940797 | 3.551495063 | 0.466733538 | 0.999559403 NA |
| ASV_16s_33727 | 0.07877451  | 0.315940797 | 3.551495063 | 0.466733538 | 0.999559403 NA |
| ASV_16s_33728 | 0.07877451  | 0.315940797 | 3.551495063 | 0.466733538 | 0.999559403 NA |
| ASV_16s_33729 | 0.07877451  | 0.315940797 | 3.551495063 | 0.466733538 | 0.999559403 NA |
| ASV_16s_33730 | 0.056755348 | 0.313518158 | 3.551810001 | 0.349137375 | 0.99983309 NA  |
| ASV_16s_33731 | 0.047318564 | 0.315338257 | 3.551899563 | 0.304086138 | 0.999895277 NA |
| ASV_16s_33732 | 0.047318564 | 0.315338257 | 3.551899563 | 0.304086138 | 0.999895277 NA |
| ASV_16s_33733 | 0.047318564 | 0.315338257 | 3.551899563 | 0.304086138 | 0.999895277 NA |
| ASV_16s_33734 | 0.047318564 | 0.315338257 | 3.551899563 | 0.304086138 | 0.999895277 NA |
| ASV_16s_33735 | 0.047318564 | 0.315338257 | 3.551899563 | 0.304086138 | 0.999895277 NA |

















|               |             |              |             |             |                |
|---------------|-------------|--------------|-------------|-------------|----------------|
| ASV_16s_34205 | 0.036716594 | 0.311315977  | 3.551985958 | 0.165720787 | 0.999986798 NA |
| ASV_16s_34206 | 0.036716594 | 0.311315977  | 3.551985958 | 0.165720787 | 0.999986798 NA |
| ASV_16s_34207 | 0.036716594 | 0.311315977  | 3.551985958 | 0.165720787 | 0.999986798 NA |
| ASV_16s_34208 | 0.036716594 | 0.311315977  | 3.551985958 | 0.165720787 | 0.999986798 NA |
| ASV_16s_34209 | 0.036716594 | 0.311315977  | 3.551985958 | 0.165720787 | 0.999986798 NA |
| ASV_16s_34210 | 0.036716594 | 0.311315977  | 3.551985958 | 0.165720787 | 0.999986798 NA |
| ASV_16s_34211 | 0.036716594 | 0.311315977  | 3.551985958 | 0.165720787 | 0.999986798 NA |
| ASV_16s_34212 | 0.036716594 | 0.311315977  | 3.551985958 | 0.165720787 | 0.999986798 NA |
| ASV_16s_34213 | 0.036716594 | 0.311315977  | 3.551985958 | 0.165720787 | 0.999986798 NA |
| ASV_16s_34214 | 0.036716594 | 0.311315977  | 3.551985958 | 0.165720787 | 0.999986798 NA |
| ASV_16s_34215 | 0.036716594 | 0.311315977  | 3.551985958 | 0.165720787 | 0.999986798 NA |
| ASV_16s_34216 | 0.036716594 | 0.311315977  | 3.551985958 | 0.165720787 | 0.999986798 NA |
| ASV_16s_34217 | 0.036716594 | 0.311315977  | 3.551985958 | 0.165720787 | 0.999986798 NA |
| ASV_16s_34218 | 0.036716594 | 0.311315977  | 3.551985958 | 0.165720787 | 0.999986798 NA |
| ASV_16s_34219 | 0.036716594 | 0.311315977  | 3.551985958 | 0.165720787 | 0.999986798 NA |
| ASV_16s_34220 | 0.036716594 | 0.311315977  | 3.551985958 | 0.165720787 | 0.999986798 NA |
| ASV_16s_34221 | 0.036716594 | 0.311315977  | 3.551985958 | 0.165720787 | 0.999986798 NA |
| ASV_16s_34222 | 0.036716594 | 0.311315977  | 3.551985958 | 0.165720787 | 0.999986798 NA |
| ASV_16s_34223 | 0.036716594 | 0.311315977  | 3.551985958 | 0.165720787 | 0.999986798 NA |
| ASV_16s_34224 | 0.036716594 | 0.311315977  | 3.551985958 | 0.165720787 | 0.999986798 NA |
| ASV_16s_34225 | 0.036716594 | 0.311315977  | 3.551985958 | 0.165720787 | 0.999986798 NA |
| ASV_16s_34226 | 0.036716594 | 0.311315977  | 3.551985958 | 0.165720787 | 0.999986798 NA |
| ASV_16s_34227 | 0.036716594 | 0.311315977  | 3.551985958 | 0.165720787 | 0.999986798 NA |
| ASV_16s_34228 | 0.036733706 | 0.166963088  | 3.551948171 | 0.185735701 | 0.999980476 NA |
| ASV_16s_34229 | 0.037493351 | 0.166963088  | 3.551948171 | 0.188997962 | 0.999979275 NA |
| ASV_16s_34230 | 0.041368248 | 0.166963088  | 3.551948171 | 0.205537279 | 0.99997238 NA  |
| ASV_16s_34231 | 0.03775227  | 0.11859199   | 3.55193492  | 0.192157641 | 0.999978064 NA |
| ASV_16s_34232 | 0.03775227  | 0.11859199   | 3.55193492  | 0.192157641 | 0.999978064 NA |
| ASV_16s_34233 | 0.038011188 | 0.070433164  | 3.551922994 | 0.193794952 | 0.999977417 NA |
| ASV_16s_34234 | 0.036745114 | 0.070433164  | 3.551922994 | 0.18868484  | 0.999979393 NA |
| ASV_16s_34235 | 0.038011188 | 0.070433164  | 3.551922994 | 0.193794952 | 0.999977417 NA |
| ASV_16s_34236 | 0.040594453 | 0.070433162  | 3.551922994 | 0.204162433 | 0.999973007 NA |
| ASV_16s_34237 | 0.038022597 | -0.025238487 | 3.55189973  | 0.188552592 | 0.999979442 NA |
| ASV_16s_34238 | 0.01312574  | 0.102805454  | 3.551957646 | 0.098302851 | 0.999997822 NA |
| ASV_16s_34239 | 0.01312574  | 0.102805454  | 3.551957646 | 0.098302851 | 0.999997822 NA |
| ASV_16s_34240 | 0.01312574  | 0.102805454  | 3.551957646 | 0.098302851 | 0.999997822 NA |
| ASV_16s_34241 | 0.01312574  | 0.102805454  | 3.551957646 | 0.098302851 | 0.999997822 NA |
| ASV_16s_34242 | 0.01312574  | 0.102805454  | 3.551957646 | 0.098302851 | 0.999997822 NA |
| ASV_16s_34243 | 0.01312574  | 0.102805454  | 3.551957646 | 0.098302851 | 0.999997822 NA |
| ASV_16s_34244 | 0.062287014 | -0.125246976 | 3.551860685 | 0.258705869 | 0.999939467 NA |
| ASV_16s_34245 | 0.062287014 | -0.125246976 | 3.551860685 | 0.258705869 | 0.999939467 NA |
| ASV_16s_34246 | 0.062287014 | -0.125246976 | 3.551860685 | 0.258705869 | 0.999939467 NA |
| ASV_16s_34247 | 0.062287014 | -0.125246976 | 3.551860685 | 0.258705869 | 0.999939467 NA |
| ASV_16s_34248 | 0.055512566 | -0.125246981 | 3.551860685 | 0.235260497 | 0.999956194 NA |
| ASV_16s_34249 | 0.052802787 | -0.125246981 | 3.551860685 | 0.225882502 | 0.999961869 NA |
| ASV_16s_34250 | 0.058858248 | -0.125246981 | 3.551860685 | 0.246797186 | 0.999948434 NA |
| ASV_16s_34251 | 0.050093008 | -0.125246976 | 3.551860685 | 0.216504398 | 0.999967009 NA |
| ASV_16s_34252 | 0.050093008 | -0.125246976 | 3.551860685 | 0.216504398 | 0.999967009 NA |
| ASV_16s_34253 | 0.050093008 | -0.125246976 | 3.551860685 | 0.216504398 | 0.999967009 NA |
| ASV_16s_34254 | 0.050093008 | -0.125246976 | 3.551860685 | 0.216504398 | 0.999967009 NA |
| ASV_16s_34255 | 0.050093008 | -0.125246976 | 3.551860685 | 0.216504398 | 0.999967009 NA |
| ASV_16s_34256 | 0.050093008 | -0.125246976 | 3.551860685 | 0.216504398 | 0.999967009 NA |
| ASV_16s_34257 | 0.050093008 | -0.125246976 | 3.551860685 | 0.216504398 | 0.999967009 NA |
| ASV_16s_34258 | 0.050093008 | -0.125246976 | 3.551860685 | 0.216504398 | 0.999967009 NA |
| ASV_16s_34259 | 0.050093008 | -0.125246976 | 3.551860685 | 0.216504398 | 0.999967009 NA |
| ASV_16s_34260 | 0.050093008 | -0.125246976 | 3.551860685 | 0.216504398 | 0.999967009 NA |
| ASV_16s_34261 | 0.050093008 | -0.125246976 | 3.551860685 | 0.216504398 | 0.999967009 NA |
| ASV_16s_34262 | 0.050093008 | -0.125246976 | 3.551860685 | 0.216504398 | 0.999967009 NA |
| ASV_16s_34263 | 0.050093008 | -0.125246976 | 3.551860685 | 0.216504398 | 0.999967009 NA |
| ASV_16s_34264 | 0.050093008 | -0.125246976 | 3.551860685 | 0.216504398 | 0.999967009 NA |
| ASV_16s_34265 | 0.050093008 | -0.125246976 | 3.551860685 | 0.216504398 | 0.999967009 NA |
| ASV_16s_34266 | 0.050093008 | -0.125246976 | 3.551860685 | 0.216504398 | 0.999967009 NA |
| ASV_16s_34267 | 0.050093008 | -0.125246976 | 3.551860685 | 0.216504398 | 0.999967009 NA |
| ASV_16s_34268 | 0.050093008 | -0.125246976 | 3.551860685 | 0.216504398 | 0.999967009 NA |
| ASV_16s_34269 | 0.050093008 | -0.125246976 | 3.551860685 | 0.216504398 | 0.999967009 NA |
| ASV_16s_34270 | 0.050093008 | -0.125246976 | 3.551860685 | 0.216504398 | 0.999967009 NA |
| ASV_16s_34271 | 0.050093008 | -0.125246976 | 3.551860685 | 0.216504398 | 0.999967009 NA |







|               |             |              |             |              |             |    |
|---------------|-------------|--------------|-------------|--------------|-------------|----|
| ASV_16s_34473 | 0.036767931 | -0.104006404 | 3.551877851 | 0.173171098  | 0.999984646 | NA |
| ASV_16s_34474 | 0.036767931 | -0.104006404 | 3.551877851 | 0.173171098  | 0.999984646 | NA |
| ASV_16s_34475 | 0.036767931 | -0.104006404 | 3.551877851 | 0.173171098  | 0.999984646 | NA |
| ASV_16s_34476 | 0.036767931 | -0.104006404 | 3.551877851 | 0.173171098  | 0.999984646 | NA |
| ASV_16s_34477 | 0.036767931 | -0.104006404 | 3.551877851 | 0.173171098  | 0.999984646 | NA |
| ASV_16s_34478 | 0.036767931 | -0.104006404 | 3.551877851 | 0.173171098  | 0.999984646 | NA |
| ASV_16s_34479 | 0.036767931 | -0.104006404 | 3.551877851 | 0.173171098  | 0.999984646 | NA |
| ASV_16s_34480 | 0.036767931 | -0.104006404 | 3.551877851 | 0.173171098  | 0.999984646 | NA |
| ASV_16s_34481 | 0.036767931 | -0.104006404 | 3.551877851 | 0.173171098  | 0.999984646 | NA |
| ASV_16s_34482 | 0.036767931 | -0.104006404 | 3.551877851 | 0.173171098  | 0.999984646 | NA |
| ASV_16s_34483 | 0.036767931 | -0.104006404 | 3.551877851 | 0.173171098  | 0.999984646 | NA |
| ASV_16s_34484 | 0.036767931 | -0.104006404 | 3.551877851 | 0.173171098  | 0.999984646 | NA |
| ASV_16s_34485 | 0.036767931 | -0.104006404 | 3.551877851 | 0.173171098  | 0.999984646 | NA |
| ASV_16s_34486 | 0.036767931 | -0.104006404 | 3.551877851 | 0.173171098  | 0.999984646 | NA |
| ASV_16s_34487 | 0.036767931 | -0.104006404 | 3.551877851 | 0.173171098  | 0.999984646 | NA |
| ASV_16s_34488 | 0.036767931 | -0.104006404 | 3.551877851 | 0.173171098  | 0.999984646 | NA |
| ASV_16s_34489 | 0.036767931 | -0.104006404 | 3.551877851 | 0.173171098  | 0.999984646 | NA |
| ASV_16s_34490 | 0.036767931 | -0.104006404 | 3.551877851 | 0.173171098  | 0.999984646 | NA |
| ASV_16s_34491 | 0.036767931 | -0.104006404 | 3.551877851 | 0.173171098  | 0.999984646 | NA |
| ASV_16s_34492 | 0.036767931 | -0.104006404 | 3.551877851 | 0.173171098  | 0.999984646 | NA |
| ASV_16s_34493 | 0.056002558 | -0.125246976 | 3.551860685 | 0.237001792  | 0.999955079 | NA |
| ASV_16s_34494 | 0.056002558 | -0.125246976 | 3.551860685 | 0.237001792  | 0.999955079 | NA |
| ASV_16s_34495 | 0.056002558 | -0.125246976 | 3.551860685 | 0.237001792  | 0.999955079 | NA |
| ASV_16s_34496 | 0.056002558 | -0.125246976 | 3.551860685 | 0.237001792  | 0.999955079 | NA |
| ASV_16s_34497 | 0.056002558 | -0.125246976 | 3.551860685 | 0.237001792  | 0.999955079 | NA |
| ASV_16s_34498 | 0.056002558 | -0.125246976 | 3.551860685 | 0.237001792  | 0.999955079 | NA |
| ASV_16s_34499 | 0.056002558 | -0.125246976 | 3.551860685 | 0.237001792  | 0.999955079 | NA |
| ASV_16s_34500 | 0.056002558 | -0.125246976 | 3.551860685 | 0.237001792  | 0.999955079 | NA |
| ASV_16s_34501 | 0.081181381 | 0.724576518  | 3.55194609  | 0.282505739  | 0.999918385 | NA |
| ASV_16s_34502 | 0.081181381 | 0.724576518  | 3.55194609  | 0.282505739  | 0.999918385 | NA |
| ASV_16s_34503 | 0.081181381 | 0.724576518  | 3.55194609  | 0.282505739  | 0.999918385 | NA |
| ASV_16s_34504 | 0.011714498 | -0.020657588 | 3.551622468 | -0.009949007 | 1           | NA |
| ASV_16s_34505 | 0.011714498 | -0.020657588 | 3.551622468 | -0.009949007 | 1           | NA |
| ASV_16s_34506 | 0.011714498 | -0.020657588 | 3.551622468 | -0.009949007 | 1           | NA |
| ASV_16s_34507 | 0.011714498 | -0.020657588 | 3.551622468 | -0.009949007 | 1           | NA |
| ASV_16s_34508 | 0.010390846 | -0.001818256 | 3.551663107 | -0.016952278 | 1           | NA |
| ASV_16s_34509 | 0.010390846 | -0.001818256 | 3.551663107 | -0.016952278 | 1           | NA |
| ASV_16s_34510 | 0.012351927 | 0.274933111  | 3.551779887 | -0.013490567 | 1           | NA |
| ASV_16s_34511 | 0.012351927 | 0.274933111  | 3.551779887 | -0.013490567 | 1           | NA |
| ASV_16s_34512 | 0.016330415 | 0.259379799  | 3.551683751 | 0.007368563  | 1           | NA |
| ASV_16s_34513 | 0.016330415 | 0.259379799  | 3.551683751 | 0.007368563  | 1           | NA |
| ASV_16s_34514 | 0.016330415 | 0.259379799  | 3.551683751 | 0.007368563  | 1           | NA |
| ASV_16s_34515 | 0.016330415 | 0.259379799  | 3.551683751 | 0.007368563  | 1           | NA |
| ASV_16s_34516 | 0.016330415 | 0.259379799  | 3.551683751 | 0.007368563  | 1           | NA |
| ASV_16s_34523 | 0.022960073 | 0.502996683  | 3.55201016  | 0.093493945  | 0.999998169 | NA |
| ASV_16s_34524 | 0.057340919 | 0.595238197  | 3.551030117 | 0.144888304  | 0.999991684 | NA |
| ASV_16s_34525 | 0.057340919 | 0.595238197  | 3.551030117 | 0.144888304  | 0.999991684 | NA |
| ASV_16s_34526 | 0.057340919 | 0.595238197  | 3.551030117 | 0.144888304  | 0.999991684 | NA |
| ASV_16s_34527 | 0.057340919 | 0.595238197  | 3.551030117 | 0.144888304  | 0.999991684 | NA |
| ASV_16s_34528 | 0.057340919 | 0.595238197  | 3.551030117 | 0.144888304  | 0.999991684 | NA |
| ASV_16s_34529 | 0.026016632 | 0.584043619  | 3.551430495 | 0.046325983  | 0.99999984  | NA |
| ASV_16s_34530 | 0.051660164 | 0.67461009   | 3.551753875 | 0.263437977  | 0.99993562  | NA |
| ASV_16s_34531 | 0.051660164 | 0.67461009   | 3.551753875 | 0.263437977  | 0.99993562  | NA |
| ASV_16s_34532 | 0.040556899 | 0.642464677  | 3.55187498  | 0.220432118  | 0.999964919 | NA |
| ASV_16s_34533 | 0.040556899 | 0.642464677  | 3.55187498  | 0.220432118  | 0.999964919 | NA |
| ASV_16s_34534 | 0.040556899 | 0.642464677  | 3.55187498  | 0.220432118  | 0.999964919 | NA |
| ASV_16s_34535 | 0.048075114 | 0.079457211  | 3.551932377 | 0.199137736  | 0.999975213 | NA |
| ASV_16s_34536 | 0.019687405 | 0.188519812  | 3.551809426 | -0.009692508 | 1           | NA |
| ASV_16s_34537 | 0.041936109 | 0.450826338  | 3.552000552 | 0.150082165  | 0.999990612 | NA |
| ASV_16s_34538 | 0.04872695  | 0.031558738  | 3.551950404 | 0.161646586  | 0.999987881 | NA |
| ASV_16s_34539 | 0.049820403 | 0.031558738  | 3.551950404 | 0.164561857  | 0.999987113 | NA |
| ASV_16s_34540 | 0.048396232 | 0.031558737  | 3.551950404 | 0.158419142  | 0.999988693 | NA |
| ASV_16s_34541 | 0.052410446 | 0.080318363  | 3.55196247  | 0.162962224  | 0.999987538 | NA |
| ASV_16s_34542 | 0.046581315 | 0.080318364  | 3.55196247  | 0.159704214  | 0.999988374 | NA |
| ASV_16s_34543 | 0.04914224  | 0.080318364  | 3.55196247  | 0.166331823  | 0.99998663  | NA |
| ASV_16s_34544 | 0.04953875  | 0.260895062  | 3.551963386 | 0.161947117  | 0.999987803 | NA |
| ASV_16s_34545 | 0.039573926 | 0.080318364  | 3.55196247  | 0.14279298   | 0.999992091 | NA |



|               |             |             |             |             |             |    |
|---------------|-------------|-------------|-------------|-------------|-------------|----|
| ASV_16s_34546 | 0.041161502 | 0.267008686 | 3.551930272 | 0.100217028 | 0.999997671 | NA |
| ASV_16s_34547 | 0.039354054 | 0.260895062 | 3.551963386 | 0.153308771 | 0.999989899 | NA |
| ASV_16s_34548 | 0.057860054 | 0.273466326 | 3.551903158 | 0.250345221 | 0.999945867 | NA |
| ASV_16s_34549 | 0.053901957 | 0.08977552  | 3.551914247 | 0.252231459 | 0.999944466 | NA |
| ASV_16s_34550 | 0.041952309 | 0.318165457 | 3.55201012  | 0.141396247 | 0.999992354 | NA |
| ASV_16s_34551 | 0.048330085 | 0.129076493 | 3.551975385 | 0.17557414  | 0.999983902 | NA |
| ASV_16s_34552 | 0.061822668 | 0.129076491 | 3.551975385 | 0.184781243 | 0.999980818 | NA |
| ASV_16s_34553 | 0.047816245 | 0.129076493 | 3.551975385 | 0.173877923 | 0.99998443  | NA |
| ASV_16s_34554 | 0.047816245 | 0.129076493 | 3.551975385 | 0.173877923 | 0.99998443  | NA |
| ASV_16s_34555 | 0.0460428   | 0.129076493 | 3.551975385 | 0.170350938 | 0.999985488 | NA |
| ASV_16s_34556 | 0.055909655 | 0.081766287 | 3.551967244 | 0.172267367 | 0.999984919 | NA |
| ASV_16s_34557 | 0.026796379 | 0.542581217 | 3.551977514 | 0.099302212 | 0.999997744 | NA |
| ASV_16s_34558 | 0.047980642 | 0.176098702 | 3.551978477 | 0.190744416 | 0.999978612 | NA |
| ASV_16s_34559 | 0.047883278 | 0.176098702 | 3.551978477 | 0.190364527 | 0.999978757 | NA |
| ASV_16s_34560 | 0.053127558 | 0.449167105 | 3.55190599  | 0.215323637 | 0.999967619 | NA |
| ASV_16s_34561 | 0.042700289 | 0.17170012  | 3.551950184 | 0.201922363 | 0.999974007 | NA |
| ASV_16s_34562 | 0.045865421 | 0.068692548 | 3.551766373 | 0.055376389 | 0.999999703 | NA |
| ASV_16s_34563 | 0.045865421 | 0.068692548 | 3.551766373 | 0.055376389 | 0.999999703 | NA |
| ASV_16s_34564 | 0.044609574 | 0.074831165 | 3.551788996 | 0.049999741 | 0.999999792 | NA |
| ASV_16s_34565 | 0.048233482 | 0.724576517 | 3.55194609  | 0.182605355 | 0.999981581 | NA |
| ASV_16s_34566 | 0.048233482 | 0.724576517 | 3.55194609  | 0.182605355 | 0.999981581 | NA |
| ASV_16s_34567 | 0.048233482 | 0.724576517 | 3.55194609  | 0.182605355 | 0.999981581 | NA |
| ASV_16s_34568 | 0.048233482 | 0.724576517 | 3.55194609  | 0.182605355 | 0.999981581 | NA |
| ASV_16s_34569 | 0.048233482 | 0.724576517 | 3.55194609  | 0.182605355 | 0.999981581 | NA |
| ASV_16s_34570 | 0.048233482 | 0.724576517 | 3.55194609  | 0.182605355 | 0.999981581 | NA |
| ASV_16s_34571 | 0.048233482 | 0.498902056 | 3.552011875 | 0.146488958 | 0.999991363 | NA |
| ASV_16s_34572 | 0.062249439 | 0.310752823 | 3.55198471  | 0.250354785 | 0.99994586  | NA |
| ASV_16s_34573 | 0.062249439 | 0.310752823 | 3.55198471  | 0.250354785 | 0.99994586  | NA |
| ASV_16s_34574 | 0.062249439 | 0.310752823 | 3.55198471  | 0.250354785 | 0.99994586  | NA |
| ASV_16s_34575 | 0.062249439 | 0.310752823 | 3.55198471  | 0.250354785 | 0.99994586  | NA |
| ASV_16s_34576 | 0.049606969 | 0.318360414 | 3.552000112 | 0.198190477 | 0.999975614 | NA |
| ASV_16s_34577 | 0.079269569 | 0.310752823 | 3.55198471  | 0.309842839 | 0.999888421 | NA |
| ASV_16s_34578 | 0.054446866 | 0.318174296 | 3.552010157 | 0.145078564 | 0.999991646 | NA |
| ASV_16s_34579 | 0.028379657 | 0.312265482 | 3.551988307 | 0.150843363 | 0.999990447 | NA |
| ASV_16s_34580 | 0.051106001 | 0.746524548 | 3.551945612 | 0.191933566 | 0.999978151 | NA |
| ASV_16s_34581 | 0.051106001 | 0.746524548 | 3.551945612 | 0.191933566 | 0.999978151 | NA |
| ASV_16s_34582 | 0.051106001 | 0.746524548 | 3.551945612 | 0.191933566 | 0.999978151 | NA |
| ASV_16s_34583 | 0.051106001 | 0.746524548 | 3.551945612 | 0.191933566 | 0.999978151 | NA |
| ASV_16s_34584 | 0.051106001 | 0.746524548 | 3.551945612 | 0.191933566 | 0.999978151 | NA |
| ASV_16s_34585 | 0.051106001 | 0.746524548 | 3.551945612 | 0.191933566 | 0.999978151 | NA |
| ASV_16s_34586 | 0.04807876  | 0.731632966 | 3.55195996  | 0.184316211 | 0.999980983 | NA |
| ASV_16s_34587 | 0.046733665 | 0.737441185 | 3.55199885  | 0.130132621 | 0.999994257 | NA |
| ASV_16s_34588 | 0.0407057   | 0.707545033 | 3.551978934 | 0.166244021 | 0.999986655 | NA |
| ASV_16s_34589 | 0.0407057   | 0.707545033 | 3.551978934 | 0.166244021 | 0.999986655 | NA |
| ASV_16s_34590 | 0.0407057   | 0.707545033 | 3.551978934 | 0.166244021 | 0.999986655 | NA |
| ASV_16s_34591 | 0.0407057   | 0.707545033 | 3.551978934 | 0.166244021 | 0.999986655 | NA |
| ASV_16s_34592 | 0.0407057   | 0.707545033 | 3.551978934 | 0.166244021 | 0.999986655 | NA |
| ASV_16s_34593 | 0.0407057   | 0.707545033 | 3.551978934 | 0.166244021 | 0.999986655 | NA |
| ASV_16s_34594 | 0.04580309  | 0.737584354 | 3.551954181 | 0.177011095 | 0.999983446 | NA |
| ASV_16s_34595 | 0.04580309  | 0.737584354 | 3.551954181 | 0.177011095 | 0.999983446 | NA |
| ASV_16s_34596 | 0.04580309  | 0.737584354 | 3.551954181 | 0.177011095 | 0.999983446 | NA |
| ASV_16s_34597 | 0.04580309  | 0.737584354 | 3.551954181 | 0.177011095 | 0.999983446 | NA |
| ASV_16s_34598 | 0.04580309  | 0.737584354 | 3.551954181 | 0.177011095 | 0.999983446 | NA |
| ASV_16s_34599 | 0.04580309  | 0.737584354 | 3.551954181 | 0.177011095 | 0.999983446 | NA |
| ASV_16s_34600 | 0.042024277 | 0.715484928 | 3.551972956 | 0.168849571 | 0.999985922 | NA |
| ASV_16s_34601 | 0.042024277 | 0.715484928 | 3.551972956 | 0.168849571 | 0.999985922 | NA |
| ASV_16s_34602 | 0.042024277 | 0.715484928 | 3.551972956 | 0.168849571 | 0.999985922 | NA |
| ASV_16s_34603 | 0.042024277 | 0.715484928 | 3.551972956 | 0.168849571 | 0.999985922 | NA |
| ASV_16s_34604 | 0.042024277 | 0.715484928 | 3.551972956 | 0.168849571 | 0.999985922 | NA |
| ASV_16s_34605 | 0.042024277 | 0.715484928 | 3.551972956 | 0.168849571 | 0.999985922 | NA |
| ASV_16s_34606 | 0.042024277 | 0.715484928 | 3.551972956 | 0.168849571 | 0.999985922 | NA |
| ASV_16s_34607 | 0.042024277 | 0.715484928 | 3.551972956 | 0.168849571 | 0.999985922 | NA |
| ASV_16s_34608 | 0.042024277 | 0.715484928 | 3.551972956 | 0.168849571 | 0.999985922 | NA |
| ASV_16s_34609 | 0.042024277 | 0.715484928 | 3.551972956 | 0.168849571 | 0.999985922 | NA |
| ASV_16s_34610 | 0.042024277 | 0.715484928 | 3.551972956 | 0.168849571 | 0.999985922 | NA |
| ASV_16s_34611 | 0.042024277 | 0.715484928 | 3.551972956 | 0.168849571 | 0.999985922 | NA |
| ASV_16s_34612 | 0.042024277 | 0.715484928 | 3.551972956 | 0.168849571 | 0.999985922 | NA |



|               |             |              |             |             |                |
|---------------|-------------|--------------|-------------|-------------|----------------|
| ASV_16s_34680 | 0.050493586 | 0.323968815  | 3.552036567 | 0.157587364 | 0.999988895 NA |
| ASV_16s_34681 | 0.072488402 | 0.324073766  | 3.552037057 | 0.283477843 | 0.999917429 NA |
| ASV_16s_34682 | 0.071206396 | 0.324073766  | 3.552037057 | 0.279194385 | 0.999921584 NA |
| ASV_16s_34683 | 0.071206396 | 0.324073766  | 3.552037057 | 0.279194385 | 0.999921584 NA |
| ASV_16s_34684 | 0.049698928 | 0.324073766  | 3.552037057 | 0.206767101 | 0.99997181 NA  |
| ASV_16s_34685 | 0.049698928 | 0.324073766  | 3.552037057 | 0.206767101 | 0.99997181 NA  |
| ASV_16s_34686 | 0.058930629 | 0.324073766  | 3.552037057 | 0.237986775 | 0.999954439 NA |
| ASV_16s_34687 | 0.058930629 | 0.324073766  | 3.552037057 | 0.237986775 | 0.999954439 NA |
| ASV_16s_34688 | 0.058930629 | 0.324073766  | 3.552037057 | 0.237986775 | 0.999954439 NA |
| ASV_16s_34689 | 0.053742566 | -0.106751449 | 3.551927536 | 0.224378689 | 0.999962728 NA |
| ASV_16s_34690 | 0.053742566 | -0.106751449 | 3.551927536 | 0.224378689 | 0.999962728 NA |
| ASV_16s_34691 | 0.053742566 | -0.106751449 | 3.551927536 | 0.224378689 | 0.999962728 NA |
| ASV_16s_34692 | 0.051660164 | -0.106751449 | 3.551927536 | 0.217695284 | 0.999966385 NA |
| ASV_16s_34693 | 0.051660164 | -0.106751449 | 3.551927536 | 0.217695284 | 0.999966385 NA |
| ASV_16s_34694 | 0.051660164 | -0.106751449 | 3.551927536 | 0.217695284 | 0.999966385 NA |
| ASV_16s_34695 | 0.051660164 | -0.106751449 | 3.551927536 | 0.217695284 | 0.999966385 NA |
| ASV_16s_34696 | 0.051660164 | -0.106751449 | 3.551927536 | 0.217695284 | 0.999966385 NA |
| ASV_16s_34697 | 0.051660164 | -0.106751449 | 3.551927536 | 0.217695284 | 0.999966385 NA |
| ASV_16s_34698 | 0.051660164 | -0.106751449 | 3.551927536 | 0.217695284 | 0.999966385 NA |
| ASV_16s_34699 | 0.051660164 | -0.106751449 | 3.551927536 | 0.217695284 | 0.999966385 NA |
| ASV_16s_34700 | 0.051660164 | -0.106751449 | 3.551927536 | 0.217695284 | 0.999966385 NA |
| ASV_16s_34701 | 0.048860792 | -0.106750881 | 3.551927536 | 0.208683624 | 0.999970907 NA |
| ASV_16s_34702 | 0.052793171 | 0.188571186  | 3.551973475 | 0.118044094 | 0.999995898 NA |
| ASV_16s_34703 | 0.061699762 | -0.106751449 | 3.551927536 | 0.249824833 | 0.999946249 NA |
| ASV_16s_34704 | 0.061699762 | -0.106751449 | 3.551927536 | 0.249824833 | 0.999946249 NA |
| ASV_16s_34705 | 0.061699762 | -0.106751449 | 3.551927536 | 0.249824833 | 0.999946249 NA |
| ASV_16s_34706 | 0.061699762 | -0.106751449 | 3.551927536 | 0.249824833 | 0.999946249 NA |
| ASV_16s_34707 | 0.061699762 | -0.106751449 | 3.551927536 | 0.249824833 | 0.999946249 NA |
| ASV_16s_34708 | 0.061699762 | -0.106751449 | 3.551927536 | 0.249824833 | 0.999946249 NA |
| ASV_16s_34709 | 0.068211731 | 0.139265762  | 3.551974555 | 0.136520538 | 0.999993225 NA |
| ASV_16s_34710 | 0.040644093 | 0.096474428  | 3.551802558 | 0.035498766 | 0.999999937 NA |
| ASV_16s_34711 | 0.08621196  | -0.106751449 | 3.551927536 | 0.327304553 | 0.999865727 NA |
| ASV_16s_34712 | 0.077092692 | -0.101244347 | 3.551909287 | 0.123772745 | 0.999995169 NA |
| ASV_16s_34713 | 0.044388292 | -0.106751449 | 3.551927536 | 0.194277404 | 0.999977224 NA |
| ASV_16s_34714 | 0.044388292 | -0.106751449 | 3.551927536 | 0.194277404 | 0.999977224 NA |
| ASV_16s_34715 | 0.044388292 | -0.106751449 | 3.551927536 | 0.194277404 | 0.999977224 NA |
| ASV_16s_34716 | 0.057446874 | -0.106751449 | 3.551927536 | 0.236242765 | 0.999955567 NA |
| ASV_16s_34717 | 0.057446874 | -0.106751449 | 3.551927536 | 0.236242765 | 0.999955567 NA |
| ASV_16s_34718 | 0.030835303 | -0.058194205 | 3.551945694 | 0.15865421  | 0.999988635 NA |
| ASV_16s_34719 | 0.030835303 | -0.058194205 | 3.551945694 | 0.15865421  | 0.999988635 NA |
| ASV_16s_34720 | 0.045361577 | -0.106751449 | 3.551927536 | 0.197418855 | 0.999975938 NA |
| ASV_16s_34721 | 0.045361577 | -0.106751449 | 3.551927536 | 0.197418855 | 0.999975938 NA |
| ASV_16s_34722 | 0.045361577 | -0.106751449 | 3.551927536 | 0.197418855 | 0.999975938 NA |
| ASV_16s_34723 | 0.045361577 | -0.106751449 | 3.551927536 | 0.197418855 | 0.999975938 NA |
| ASV_16s_34724 | 0.040361454 | -0.106751449 | 3.551927536 | 0.181256505 | 0.999982043 NA |
| ASV_16s_34725 | 0.040361454 | -0.106751449 | 3.551927536 | 0.181256505 | 0.999982043 NA |
| ASV_16s_34726 | 0.040361454 | -0.106751449 | 3.551927536 | 0.181256505 | 0.999982043 NA |
| ASV_16s_34727 | 0.040361454 | -0.106751449 | 3.551927536 | 0.181256505 | 0.999982043 NA |
| ASV_16s_34728 | 0.040361454 | -0.106751449 | 3.551927536 | 0.181256505 | 0.999982043 NA |
| ASV_16s_34729 | 0.040361454 | -0.106751449 | 3.551927536 | 0.181256505 | 0.999982043 NA |
| ASV_16s_34730 | 0.040361454 | -0.106751449 | 3.551927536 | 0.181256505 | 0.999982043 NA |
| ASV_16s_34731 | 0.055612553 | 0.746524548  | 3.551945612 | 0.20548296  | 0.999972405 NA |
| ASV_16s_34732 | 0.055612553 | 0.746524548  | 3.551945612 | 0.20548296  | 0.999972405 NA |
| ASV_16s_34733 | 0.055612553 | 0.746524548  | 3.551945612 | 0.20548296  | 0.999972405 NA |
| ASV_16s_34734 | 0.055612553 | 0.746524548  | 3.551945612 | 0.20548296  | 0.999972405 NA |
| ASV_16s_34735 | 0.055612553 | 0.746524548  | 3.551945612 | 0.20548296  | 0.999972405 NA |
| ASV_16s_34736 | 0.055612553 | 0.746524548  | 3.551945612 | 0.20548296  | 0.999972405 NA |
| ASV_16s_34737 | 0.055612553 | 0.746524548  | 3.551945612 | 0.20548296  | 0.999972405 NA |
| ASV_16s_34738 | 0.055612553 | 0.746524548  | 3.551945612 | 0.20548296  | 0.999972405 NA |
| ASV_16s_34739 | 0.084906469 | 0.746524549  | 3.551945612 | 0.292671042 | 0.999907998 NA |
| ASV_16s_34740 | 0.084906469 | 0.746524549  | 3.551945612 | 0.292671042 | 0.999907998 NA |
| ASV_16s_34741 | 0.084906469 | 0.746524549  | 3.551945612 | 0.292671042 | 0.999907998 NA |
| ASV_16s_34742 | 0.060838159 | 0.746524548  | 3.551945612 | 0.221148363 | 0.999964529 NA |
| ASV_16s_34743 | 0.060838159 | 0.746524548  | 3.551945612 | 0.221148363 | 0.999964529 NA |
| ASV_16s_34744 | 0.060838159 | 0.746524548  | 3.551945612 | 0.221148363 | 0.999964529 NA |
| ASV_16s_34745 | 0.060838159 | 0.746524548  | 3.551945612 | 0.221148363 | 0.999964529 NA |
| ASV_16s_34746 | 0.060838159 | 0.746524548  | 3.551945612 | 0.221148363 | 0.999964529 NA |



|               |             |              |             |             |             |    |
|---------------|-------------|--------------|-------------|-------------|-------------|----|
| ASV_16s_34814 | 0.060221822 | 0.337884664  | 3.551939124 | 0.182870961 | 0.999981489 | NA |
| ASV_16s_34815 | 0.060221822 | 0.337884664  | 3.551939124 | 0.182870961 | 0.999981489 | NA |
| ASV_16s_34816 | 0.060221822 | 0.337884664  | 3.551939124 | 0.182870961 | 0.999981489 | NA |
| ASV_16s_34817 | 0.060221822 | 0.337884664  | 3.551939124 | 0.182870961 | 0.999981489 | NA |
| ASV_16s_34818 | 0.060221822 | 0.337884664  | 3.551939124 | 0.182870961 | 0.999981489 | NA |
| ASV_16s_34819 | 0.038036274 | 0.337884664  | 3.551939124 | 0.125304239 | 0.999994959 | NA |
| ASV_16s_34820 | 0.073421306 | 0.337884664  | 3.551939124 | 0.216678622 | 0.999966918 | NA |
| ASV_16s_34821 | 0.073421306 | 0.337884664  | 3.551939124 | 0.216678622 | 0.999966918 | NA |
| ASV_16s_34822 | 0.073421306 | 0.337884664  | 3.551939124 | 0.216678622 | 0.999966918 | NA |
| ASV_16s_34823 | 0.073421306 | 0.337884664  | 3.551939124 | 0.216678622 | 0.999966918 | NA |
| ASV_16s_34824 | 0.013243906 | 0.326562275  | 3.551995018 | 0.063463584 | 0.999999523 | NA |
| ASV_16s_34825 | 0.013243906 | 0.326562275  | 3.551995018 | 0.063463584 | 0.999999523 | NA |
| ASV_16s_34826 | 0.053359675 | 0.337884664  | 3.551939124 | 0.165165456 | 0.99998695  | NA |
| ASV_16s_34827 | 0.053359675 | 0.337884664  | 3.551939124 | 0.165165456 | 0.99998695  | NA |
| ASV_16s_34828 | 0.053359675 | 0.337884664  | 3.551939124 | 0.165165456 | 0.99998695  | NA |
| ASV_16s_34829 | 0.021370365 | -0.011510138 | 3.551852598 | 0.100271184 | 0.999997667 | NA |
| ASV_16s_34830 | 0.021370365 | -0.011510138 | 3.551852598 | 0.100271184 | 0.999997667 | NA |
| ASV_16s_34831 | 0.052423322 | -0.107488572 | 3.551743305 | 0.159943059 | 0.999988314 | NA |
| ASV_16s_34832 | 0.052423322 | -0.107488572 | 3.551743305 | 0.159943059 | 0.999988314 | NA |
| ASV_16s_34833 | 0.052423322 | -0.107488572 | 3.551743305 | 0.159943059 | 0.999988314 | NA |
| ASV_16s_34834 | 0.052423322 | -0.107488572 | 3.551743305 | 0.159943059 | 0.999988314 | NA |
| ASV_16s_34835 | 0.052423322 | -0.107488572 | 3.551743305 | 0.159943059 | 0.999988314 | NA |
| ASV_16s_34836 | 0.052423322 | -0.107488572 | 3.551743305 | 0.159943059 | 0.999988314 | NA |
| ASV_16s_34837 | 0.052423322 | -0.107488572 | 3.551743305 | 0.159943059 | 0.999988314 | NA |
| ASV_16s_34838 | 0.052423322 | -0.107488572 | 3.551743305 | 0.159943059 | 0.999988314 | NA |
| ASV_16s_34839 | 0.052423322 | -0.107488572 | 3.551743305 | 0.159943059 | 0.999988314 | NA |
| ASV_16s_34840 | 0.052423322 | -0.107488572 | 3.551743305 | 0.159943059 | 0.999988314 | NA |
| ASV_16s_34841 | 0.067622867 | -0.107488572 | 3.551743305 | 0.197544278 | 0.999975885 | NA |
| ASV_16s_34842 | 0.067622867 | -0.107488572 | 3.551743305 | 0.197544278 | 0.999975885 | NA |
| ASV_16s_34843 | 0.067622867 | -0.107488572 | 3.551743305 | 0.197544278 | 0.999975885 | NA |
| ASV_16s_34844 | 0.067622867 | -0.107488572 | 3.551743305 | 0.197544278 | 0.999975885 | NA |
| ASV_16s_34845 | 0.067622867 | -0.107488572 | 3.551743305 | 0.197544278 | 0.999975885 | NA |
| ASV_16s_34846 | 0.073236063 | -0.107488572 | 3.551743305 | 0.211321189 | 0.999969631 | NA |
| ASV_16s_34847 | 0.073236063 | -0.107488572 | 3.551743305 | 0.211321189 | 0.999969631 | NA |
| ASV_16s_34848 | 0.073236063 | -0.107488572 | 3.551743305 | 0.211321189 | 0.999969631 | NA |
| ASV_16s_34849 | 0.069797276 | -0.107488572 | 3.551743305 | 0.202888048 | 0.999973579 | NA |
| ASV_16s_34850 | 0.069797276 | -0.107488572 | 3.551743305 | 0.202888048 | 0.999973579 | NA |
| ASV_16s_34851 | 0.069797276 | -0.107488572 | 3.551743305 | 0.202888048 | 0.999973579 | NA |
| ASV_16s_34852 | 0.064568495 | -0.107488572 | 3.551743305 | 0.190023054 | 0.999978887 | NA |
| ASV_16s_34853 | 0.064568495 | -0.107488572 | 3.551743305 | 0.190023054 | 0.999978887 | NA |
| ASV_16s_34854 | 0.064568495 | -0.107488572 | 3.551743305 | 0.190023054 | 0.999978887 | NA |
| ASV_16s_34855 | 0.025953818 | -0.05354374  | 3.551806183 | 0.105324173 | 0.999997234 | NA |
| ASV_16s_34856 | 0.025953818 | -0.05354374  | 3.551806183 | 0.105324173 | 0.999997234 | NA |
| ASV_16s_34857 | 0.025953818 | -0.05354374  | 3.551806183 | 0.105324173 | 0.999997234 | NA |
| ASV_16s_34858 | 0.023786116 | -0.034348467 | 3.551826992 | 0.105331065 | 0.999997234 | NA |
| ASV_16s_34859 | 0.042586708 | -0.107488572 | 3.551743305 | 0.135375877 | 0.999993419 | NA |
| ASV_16s_34860 | 0.053481815 | 0.769222541  | 3.551820288 | 0.149782446 | 0.999990676 | NA |
| ASV_16s_34861 | 0.053481815 | 0.769222541  | 3.551820288 | 0.149782446 | 0.999990676 | NA |
| ASV_16s_34862 | 0.046912648 | 0.769222541  | 3.551820288 | 0.133687968 | 0.999993697 | NA |
| ASV_16s_34863 | 0.046912648 | 0.769222541  | 3.551820288 | 0.133687968 | 0.999993697 | NA |
| ASV_16s_34864 | 0.046912648 | 0.769222541  | 3.551820288 | 0.133687968 | 0.999993697 | NA |
| ASV_16s_34865 | 0.046912648 | 0.769222541  | 3.551820288 | 0.133687968 | 0.999993697 | NA |
| ASV_16s_34866 | 0.046912648 | 0.769222541  | 3.551820288 | 0.133687968 | 0.999993697 | NA |
| ASV_16s_34867 | 0.046912648 | 0.769222541  | 3.551820288 | 0.133687968 | 0.999993697 | NA |
| ASV_16s_34868 | 0.018856133 | 0.596002598  | 3.551933911 | 0.07616095  | 0.999999101 | NA |
| ASV_16s_34869 | 0.018856133 | 0.596002598  | 3.551933911 | 0.07616095  | 0.999999101 | NA |
| ASV_16s_34870 | 0.042586708 | -0.052731646 | 3.551670255 | 0.260999962 | 0.999937622 | NA |
| ASV_16s_34871 | 0.042586708 | -0.052731646 | 3.551670255 | 0.260999962 | 0.999937622 | NA |
| ASV_16s_34872 | 0.042586708 | -0.052731646 | 3.551670255 | 0.260999962 | 0.999937622 | NA |
| ASV_16s_34873 | 0.042586708 | -0.052731646 | 3.551670255 | 0.260999962 | 0.999937622 | NA |
| ASV_16s_34874 | 0.042586708 | -0.052731646 | 3.551670255 | 0.260999962 | 0.999937622 | NA |
| ASV_16s_34875 | 0.042586708 | -0.052731646 | 3.551670255 | 0.260999962 | 0.999937622 | NA |
| ASV_16s_34876 | 0.042586708 | -0.052731646 | 3.551670255 | 0.260999962 | 0.999937622 | NA |
| ASV_16s_34877 | 0.042586708 | -0.052731646 | 3.551670255 | 0.260999962 | 0.999937622 | NA |
| ASV_16s_34878 | 0.042586708 | -0.052731646 | 3.551670255 | 0.260999962 | 0.999937622 | NA |
| ASV_16s_34879 | 0.042586708 | -0.052731646 | 3.551670255 | 0.260999962 | 0.999937622 | NA |
| ASV_16s_34880 | 0.042586708 | -0.052731646 | 3.551670255 | 0.260999962 | 0.999937622 | NA |





|               |             |              |             |             |             |    |
|---------------|-------------|--------------|-------------|-------------|-------------|----|
| ASV_16s_35015 | 0.049438841 | 0.337884664  | 3.551939124 | 0.154852956 | 0.999989544 | NA |
| ASV_16s_35016 | 0.071670209 | 0.04024302   | 3.551980931 | 0.232428497 | 0.999957966 | NA |
| ASV_16s_35017 | 0.058000098 | 0.466285026  | 3.551959214 | 0.124503595 | 0.99999507  | NA |
| ASV_16s_35018 | 0.065812356 | 0.173455552  | 3.551973793 | 0.189063679 | 0.99997925  | NA |
| ASV_16s_35019 | 0.035115742 | 0.332413122  | 3.551954339 | 0.112789652 | 0.999996495 | NA |
| ASV_16s_35020 | 0.049888368 | 0.724576517  | 3.55194609  | 0.187670165 | 0.99997977  | NA |
| ASV_16s_35021 | 0.090142169 | 0.724576518  | 3.55194609  | 0.309338268 | 0.999889034 | NA |
| ASV_16s_35022 | 0.055612553 | 0.310752823  | 3.55198471  | 0.226970805 | 0.999961238 | NA |
| ASV_16s_35023 | 0.055612553 | 0.310752823  | 3.55198471  | 0.226970805 | 0.999961238 | NA |
| ASV_16s_35024 | 0.055612553 | 0.310752823  | 3.55198471  | 0.226970805 | 0.999961238 | NA |
| ASV_16s_35025 | 0.067855854 | -0.125246976 | 3.551860685 | 0.277858308 | 0.99992285  | NA |
| ASV_16s_35026 | 0.067855854 | -0.125246976 | 3.551860685 | 0.277858308 | 0.99992285  | NA |
| ASV_16s_35027 | 0.067280944 | 0.724576518  | 3.55194609  | 0.240598038 | 0.999952713 | NA |
| ASV_16s_35028 | 0.047192289 | 0.720843056  | 3.55194762  | 0.179920559 | 0.999982493 | NA |
| ASV_16s_35029 | 0.060221822 | 0.724576518  | 3.55194609  | 0.219182562 | 0.999965594 | NA |
| ASV_16s_35030 | 0.060221822 | 0.724576518  | 3.55194609  | 0.219182562 | 0.999965594 | NA |
| ASV_16s_35031 | 0.060221822 | 0.724576518  | 3.55194609  | 0.219182562 | 0.999965594 | NA |
| ASV_16s_35032 | 0.060221822 | 0.724576518  | 3.55194609  | 0.219182562 | 0.999965594 | NA |
| ASV_16s_35033 | 0.060221822 | 0.724576518  | 3.55194609  | 0.219182562 | 0.999965594 | NA |
| ASV_16s_35034 | 0.102111529 | 0.721177202  | 3.551805296 | 0.34970465  | 0.999832176 | NA |
| ASV_16s_35035 | 0.102111529 | 0.721177202  | 3.551805296 | 0.34970465  | 0.999832176 | NA |
| ASV_16s_35036 | 0.096469445 | 0.721177202  | 3.551805296 | 0.330551003 | 0.999861182 | NA |
| ASV_16s_35037 | 0.071965231 | 0.721177202  | 3.551805296 | 0.24664809  | 0.99994854  | NA |
| ASV_16s_35038 | 0.046553949 | 0.68977139   | 3.551846755 | 0.166740022 | 0.999986517 | NA |
| ASV_16s_35039 | 0.045463896 | 0.684822871  | 3.551853053 | 0.16445268  | 0.999987142 | NA |
| ASV_16s_35040 | 0.03202249  | 0.298663841  | 3.551950318 | 0.153464199 | 0.999989863 | NA |
| ASV_16s_35041 | 0.072197595 | 0.293384806  | 3.55190345  | 0.296553209 | 0.9999038   | NA |
| ASV_16s_35042 | 0.072197595 | 0.293384806  | 3.55190345  | 0.296553209 | 0.9999038   | NA |
| ASV_16s_35043 | 0.062460758 | 0.293384806  | 3.55190345  | 0.254884204 | 0.999942454 | NA |
| ASV_16s_35044 | 0.022075205 | 0.302640622  | 3.551960644 | 0.136771058 | 0.999993182 | NA |
| ASV_16s_35045 | 0.03061496  | 0.299094342  | 3.551952087 | 0.150935726 | 0.999990427 | NA |
| ASV_16s_35046 | 0.018180192 | 0.304555136  | 3.551965656 | 0.116267305 | 0.999996107 | NA |
| ASV_16s_35047 | 0.064986557 | 0.293384806  | 3.55190345  | 0.265718209 | 0.999933707 | NA |
| ASV_16s_35048 | 0.025492972 | 0.301128804  | 3.551956883 | 0.144061229 | 0.999991846 | NA |
| ASV_16s_35049 | 0.051277965 | 0.293492309  | 3.551904288 | 0.207010311 | 0.999971697 | NA |
| ASV_16s_35050 | 0.060221822 | -0.144431501 | 3.551787436 | 0.248212924 | 0.99994742  | NA |
| ASV_16s_35051 | 0.060221822 | -0.144431501 | 3.551787436 | 0.248212924 | 0.99994742  | NA |
| ASV_16s_35052 | 0.060221822 | -0.144431501 | 3.551787436 | 0.248212924 | 0.99994742  | NA |
| ASV_16s_35053 | 0.060221822 | -0.144431501 | 3.551787436 | 0.248212924 | 0.99994742  | NA |
| ASV_16s_35054 | 0.060221822 | -0.144431501 | 3.551787436 | 0.248212924 | 0.99994742  | NA |
| ASV_16s_35055 | 0.060221822 | -0.144431501 | 3.551787436 | 0.248212924 | 0.99994742  | NA |
| ASV_16s_35056 | 0.060221822 | -0.144431501 | 3.551787436 | 0.248212924 | 0.99994742  | NA |
| ASV_16s_35057 | 0.060221822 | -0.144431501 | 3.551787436 | 0.248212924 | 0.99994742  | NA |
| ASV_16s_35058 | 0.081298621 | -0.144431501 | 3.551787436 | 0.33171389  | 0.999859528 | NA |
| ASV_16s_35059 | 0.102947999 | 0.721177202  | 3.551805296 | 0.352539079 | 0.999827556 | NA |
| ASV_16s_35060 | 0.102947999 | 0.721177202  | 3.551805296 | 0.352539079 | 0.999827556 | NA |
| ASV_16s_35061 | 0.102947999 | 0.721177202  | 3.551805296 | 0.352539079 | 0.999827556 | NA |
| ASV_16s_35062 | 0.093602234 | 0.721177202  | 3.551805296 | 0.320793934 | 0.99987453  | NA |
| ASV_16s_35063 | 0.0360896   | 0.637215359  | 3.551897352 | 0.14813235  | 0.999991025 | NA |
| ASV_16s_35064 | 0.069580444 | -0.106751449 | 3.551927536 | 0.274883143 | 0.999925617 | NA |
| ASV_16s_35065 | 0.082946118 | -0.106751449 | 3.551927536 | 0.31705993  | 0.999879394 | NA |
| ASV_16s_35066 | 0.082946118 | -0.106751449 | 3.551927536 | 0.31705993  | 0.999879394 | NA |
| ASV_16s_35067 | 0.082946118 | -0.106751449 | 3.551927536 | 0.31705993  | 0.999879394 | NA |
| ASV_16s_35068 | 0.082946118 | -0.106751449 | 3.551927536 | 0.31705993  | 0.999879394 | NA |
| ASV_16s_35069 | 0.082946118 | -0.106751449 | 3.551927536 | 0.31705993  | 0.999879394 | NA |
| ASV_16s_35070 | 0.082946118 | -0.106751449 | 3.551927536 | 0.31705993  | 0.999879394 | NA |
| ASV_16s_35071 | 0.082946118 | -0.106751449 | 3.551927536 | 0.31705993  | 0.999879394 | NA |
| ASV_16s_35072 | 0.082946118 | -0.106751449 | 3.551927536 | 0.31705993  | 0.999879394 | NA |
| ASV_16s_35073 | 0.082946118 | -0.106751449 | 3.551927536 | 0.31705993  | 0.999879394 | NA |
| ASV_16s_35074 | 0.082946118 | -0.106751449 | 3.551927536 | 0.31705993  | 0.999879394 | NA |
| ASV_16s_35075 | 0.082946118 | -0.106751449 | 3.551927536 | 0.31705993  | 0.999879394 | NA |
| ASV_16s_35076 | 0.082946118 | -0.106751449 | 3.551927536 | 0.31705993  | 0.999879394 | NA |
| ASV_16s_35077 | 0.082946118 | -0.106751449 | 3.551927536 | 0.31705993  | 0.999879394 | NA |
| ASV_16s_35078 | 0.082946118 | -0.106751449 | 3.551927536 | 0.31705993  | 0.999879394 | NA |
| ASV_16s_35079 | 0.073251164 | 0.175676103  | 3.551981562 | 0.232693462 | 0.999957802 | NA |
| ASV_16s_35080 | 0.069281318 | 0.453700759  | 3.551924376 | 0.252954042 | 0.999943923 | NA |
| ASV_16s_35081 | 0.073421306 | 0.337884664  | 3.551939124 | 0.216678622 | 0.999966918 | NA |









































|               |             |              |             |              |                |
|---------------|-------------|--------------|-------------|--------------|----------------|
| ASV_16s_36221 | 0.032682605 | -0.071826264 | 3.551897789 | 0.151052814  | 0.999990401 NA |
| ASV_16s_36222 | 0.032682605 | -0.071826264 | 3.551897789 | 0.151052814  | 0.999990401 NA |
| ASV_16s_36223 | 0.032682605 | -0.071826264 | 3.551897789 | 0.151052814  | 0.999990401 NA |
| ASV_16s_36224 | 0.032682605 | -0.071826264 | 3.551897789 | 0.151052814  | 0.999990401 NA |
| ASV_16s_36225 | 0.032682605 | -0.071826264 | 3.551897789 | 0.151052814  | 0.999990401 NA |
| ASV_16s_36226 | 0.032682605 | -0.071826264 | 3.551897789 | 0.151052814  | 0.999990401 NA |
| ASV_16s_36227 | 0.032682605 | -0.071826264 | 3.551897789 | 0.151052814  | 0.999990401 NA |
| ASV_16s_36228 | 0.032682605 | -0.071826264 | 3.551897789 | 0.151052814  | 0.999990401 NA |
| ASV_16s_36229 | 0.032682605 | -0.071826264 | 3.551897789 | 0.151052814  | 0.999990401 NA |
| ASV_16s_36230 | 0.032682605 | -0.071826264 | 3.551897789 | 0.151052814  | 0.999990401 NA |
| ASV_16s_36231 | 0.032682605 | -0.071826264 | 3.551897789 | 0.151052814  | 0.999990401 NA |
| ASV_16s_36232 | 0.032682605 | -0.071826264 | 3.551897789 | 0.151052814  | 0.999990401 NA |
| ASV_16s_36233 | 0.032682605 | -0.071826264 | 3.551897789 | 0.151052814  | 0.999990401 NA |
| ASV_16s_36234 | 0.032682605 | -0.071826264 | 3.551897789 | 0.151052814  | 0.999990401 NA |
| ASV_16s_36235 | 0.032682605 | -0.071826264 | 3.551897789 | 0.151052814  | 0.999990401 NA |
| ASV_16s_36236 | 0.032682605 | -0.071826264 | 3.551897789 | 0.151052814  | 0.999990401 NA |
| ASV_16s_36237 | 0.032682605 | -0.071826264 | 3.551897789 | 0.151052814  | 0.999990401 NA |
| ASV_16s_36238 | 0.032682605 | -0.071826264 | 3.551897789 | 0.151052814  | 0.999990401 NA |
| ASV_16s_36239 | 0.032682605 | -0.071826264 | 3.551897789 | 0.151052814  | 0.999990401 NA |
| ASV_16s_36240 | 0.032682605 | -0.071826264 | 3.551897789 | 0.151052814  | 0.999990401 NA |
| ASV_16s_36241 | 0.032682605 | -0.071826264 | 3.551897789 | 0.151052814  | 0.999990401 NA |
| ASV_16s_36242 | 0.032682605 | -0.071826264 | 3.551897789 | 0.151052814  | 0.999990401 NA |
| ASV_16s_36243 | 0.032682605 | -0.071826264 | 3.551897789 | 0.151052814  | 0.999990401 NA |
| ASV_16s_36244 | 0.032682605 | -0.071826264 | 3.551897789 | 0.151052814  | 0.999990401 NA |
| ASV_16s_36245 | 0.032682605 | -0.071826264 | 3.551897789 | 0.151052814  | 0.999990401 NA |
| ASV_16s_36246 | 0.032682605 | -0.071826264 | 3.551897789 | 0.151052814  | 0.999990401 NA |
| ASV_16s_36247 | 0.032682605 | -0.071826264 | 3.551897789 | 0.151052814  | 0.999990401 NA |
| ASV_16s_36248 | 0.032682605 | -0.071826264 | 3.551897789 | 0.151052814  | 0.999990401 NA |
| ASV_16s_36249 | 0.032682605 | -0.071826264 | 3.551897789 | 0.151052814  | 0.999990401 NA |
| ASV_16s_36250 | 0.032682605 | -0.071826264 | 3.551897789 | 0.151052814  | 0.999990401 NA |
| ASV_16s_36251 | 0.032682605 | -0.071826264 | 3.551897789 | 0.151052814  | 0.999990401 NA |
| ASV_16s_36252 | 0.049780052 | -0.071826264 | 3.551897789 | 0.207792017  | 0.99997133 NA  |
| ASV_16s_36253 | 0.049780052 | -0.071826264 | 3.551897789 | 0.207792017  | 0.99997133 NA  |
| ASV_16s_36254 | 0.049780052 | -0.071826264 | 3.551897789 | 0.207792017  | 0.99997133 NA  |
| ASV_16s_36255 | 0.049780052 | -0.071826264 | 3.551897789 | 0.207792017  | 0.99997133 NA  |
| ASV_16s_36256 | 0.049780052 | -0.071826264 | 3.551897789 | 0.207792017  | 0.99997133 NA  |
| ASV_16s_36257 | 0.049780052 | -0.071826264 | 3.551897789 | 0.207792017  | 0.99997133 NA  |
| ASV_16s_36258 | 0.049780052 | -0.071826264 | 3.551897789 | 0.207792017  | 0.99997133 NA  |
| ASV_16s_36259 | 0.072161228 | 0.678839466  | 3.551955164 | 0.246832898  | 0.999948409 NA |
| ASV_16s_36260 | 0.010412887 | -0.002026102 | 3.551662644 | -0.016876827 | 1 NA           |
| ASV_16s_36261 | 0.010412887 | -0.002026102 | 3.551662644 | -0.016876827 | 1 NA           |
| ASV_16s_36262 | 0.009236307 | 0.017812989  | 3.551697651 | -0.022432488 | 1 NA           |
| ASV_16s_36263 | 0.009236307 | 0.017812989  | 3.551697651 | -0.022432488 | 1 NA           |
| ASV_16s_36264 | 0.009236307 | 0.017812989  | 3.551697651 | -0.022432488 | 1 NA           |
| ASV_16s_36265 | 0.009236307 | 0.017812989  | 3.551697651 | -0.022432488 | 1 NA           |
| ASV_16s_36266 | 0.006273921 | 0.080463138  | 3.551812315 | -0.031392004 | 1 NA           |
| ASV_16s_36267 | 0.010979491 | 0.281620033  | 3.551821908 | -0.019464975 | 1 NA           |
| ASV_16s_36268 | 0.014515924 | 0.266056943  | 3.551723066 | -0.002736724 | 1 NA           |
| ASV_16s_36269 | 0.014515924 | 0.266056943  | 3.551723066 | -0.002736724 | 1 NA           |
| ASV_16s_36279 | 0.050969706 | 0.595084718  | 3.551090179 | 0.108902058  | 0.999996895 NA |
| ASV_16s_36280 | 0.023125895 | 0.577487081  | 3.551501363 | 0.029160728  | 0.999999968 NA |
| ASV_16s_36281 | 0.045920146 | 0.65986383   | 3.551816201 | 0.229110032  | 0.999959978 NA |
| ASV_16s_36282 | 0.045920146 | 0.65986383   | 3.551816201 | 0.229110032  | 0.999959978 NA |
| ASV_16s_36283 | 0.045920146 | 0.65986383   | 3.551816201 | 0.229110032  | 0.999959978 NA |
| ASV_16s_36284 | 0.045920146 | 0.65986383   | 3.551816201 | 0.229110032  | 0.999959978 NA |
| ASV_16s_36285 | 0.045920146 | 0.65986383   | 3.551816201 | 0.229110032  | 0.999959978 NA |
| ASV_16s_36286 | 0.045920146 | 0.65986383   | 3.551816201 | 0.229110032  | 0.999959978 NA |
| ASV_16s_36287 | 0.045920146 | 0.65986383   | 3.551816201 | 0.229110032  | 0.999959978 NA |
| ASV_16s_36288 | 0.045920146 | 0.65986383   | 3.551816201 | 0.229110032  | 0.999959978 NA |
| ASV_16s_36289 | 0.036050577 | 0.625272901  | 3.55192601  | 0.191534041  | 0.999978307 NA |
| ASV_16s_36290 | 0.036050577 | 0.625272901  | 3.55192601  | 0.191534041  | 0.999978307 NA |
| ASV_16s_36291 | 0.036050577 | 0.625272901  | 3.55192601  | 0.191534041  | 0.999978307 NA |
| ASV_16s_36292 | 0.0397289   | 0.023681775  | 3.551906485 | 0.071836004  | 0.999999266 NA |
| ASV_16s_36293 | 0.037736285 | -0.062611292 | 3.551904065 | 0.145896094  | 0.999991483 NA |
| ASV_16s_36294 | 0.034690418 | 0.120833866  | 3.551946637 | 0.124853134  | 0.999995022 NA |
| ASV_16s_36295 | 0.03835186  | 0.451584425  | 3.552002968 | 0.136111312  | 0.999993295 NA |
| ASV_16s_36296 | 0.04128067  | 0.215039587  | 3.551960664 | 0.147429699  | 0.999991171 NA |

|               |             |             |             |              |             |      |
|---------------|-------------|-------------|-------------|--------------|-------------|------|
| ASV_16s_36297 | 0.041357145 | 0.511371477 | 3.551945948 | 0.179184553  | 0.999982738 | NA   |
| ASV_16s_36298 | 0.040916035 | 0.128355643 | 3.551972723 | 0.140366005  | 0.999992544 | NA   |
| ASV_16s_36299 | 0.030103007 | 0.329469508 | 3.551631073 | 0.005167106  |             | 1 NA |
| ASV_16s_36300 | 0.044412279 | 0.295053736 | 3.551891768 | -0.047060467 |             | 1 NA |
| ASV_16s_36301 | 0.061909148 | 0.503397751 | 3.551951879 | 0.09740889   | 0.999997889 | NA   |
| ASV_16s_36302 | 0.037872688 | 0.318944803 | 3.552013242 | 0.134504169  | 0.999993564 | NA   |
| ASV_16s_36303 | 0.042331493 | 0.177112421 | 3.55198641  | 0.156891394  | 0.999989063 | NA   |
| ASV_16s_36304 | 0.042853878 | 0.177112421 | 3.55198641  | 0.157788392  | 0.999988847 | NA   |
| ASV_16s_36305 | 0.040879337 | 0.401012147 | 3.551977636 | 0.159194812  | 0.999988501 | NA   |
| ASV_16s_36306 | 0.030325979 | 0.142415234 | 3.55180825  | 5.73E-04     |             | 1 NA |
| ASV_16s_36307 | 0.033041646 | 0.671384387 | 3.551886598 | 0.002711432  |             | 1 NA |
| ASV_16s_36308 | 0.038603555 | 0.319661854 | 3.552015106 | 0.178922823  | 0.999982824 | NA   |
| ASV_16s_36309 | 0.042240624 | 0.225220055 | 3.551997064 | 0.176531489  | 0.999983599 | NA   |
| ASV_16s_36310 | 0.02607086  | 0.168409669 | 3.551706313 | 0.008952029  | 0.999999999 | NA   |
| ASV_16s_36311 | 0.041133565 | 0.114855259 | 3.551891556 | 0.022616319  | 0.999999987 | NA   |
| ASV_16s_36312 | 0.037144834 | 0.542541555 | 3.551968798 | 0.152337298  | 0.999990117 | NA   |
| ASV_16s_36313 | 0.042874206 | 0.678839465 | 3.551955164 | 0.161228142  | 0.999987988 | NA   |
| ASV_16s_36314 | 0.042874206 | 0.678839465 | 3.551955164 | 0.161228142  | 0.999987988 | NA   |
| ASV_16s_36315 | 0.042874206 | 0.678839465 | 3.551955164 | 0.161228142  | 0.999987988 | NA   |
| ASV_16s_36316 | 0.042874206 | 0.678839465 | 3.551955164 | 0.161228142  | 0.999987988 | NA   |
| ASV_16s_36317 | 0.042874206 | 0.678839465 | 3.551955164 | 0.161228142  | 0.999987988 | NA   |
| ASV_16s_36318 | 0.042874206 | 0.678839465 | 3.551955164 | 0.161228142  | 0.999987988 | NA   |
| ASV_16s_36319 | 0.042874206 | 0.678839465 | 3.551955164 | 0.161228142  | 0.999987988 | NA   |
| ASV_16s_36320 | 0.055332835 | 0.311577062 | 3.551986573 | 0.219094412  | 0.999965641 | NA   |
| ASV_16s_36321 | 0.055332835 | 0.311577062 | 3.551986573 | 0.219094412  | 0.999965641 | NA   |
| ASV_16s_36322 | 0.055332835 | 0.311577062 | 3.551986573 | 0.219094412  | 0.999965641 | NA   |
| ASV_16s_36323 | 0.055332835 | 0.311577062 | 3.551986573 | 0.219094412  | 0.999965641 | NA   |
| ASV_16s_36324 | 0.055332835 | 0.311577062 | 3.551986573 | 0.219094412  | 0.999965641 | NA   |
| ASV_16s_36325 | 0.055332835 | 0.311577062 | 3.551986573 | 0.219094412  | 0.999965641 | NA   |
| ASV_16s_36326 | 0.055332835 | 0.311577062 | 3.551986573 | 0.219094412  | 0.999965641 | NA   |
| ASV_16s_36327 | 0.055332835 | 0.311577062 | 3.551986573 | 0.219094412  | 0.999965641 | NA   |
| ASV_16s_36328 | 0.055332835 | 0.311577062 | 3.551986573 | 0.219094412  | 0.999965641 | NA   |
| ASV_16s_36329 | 0.073416057 | 0.311577062 | 3.551986573 | 0.279652723  | 0.999921147 | NA   |
| ASV_16s_36330 | 0.055300974 | 0.311577062 | 3.551986573 | 0.218986934  | 0.999965699 | NA   |
| ASV_16s_36331 | 0.055074953 | 0.311577062 | 3.551986573 | 0.218224406  | 0.999966105 | NA   |
| ASV_16s_36332 | 0.053431152 | 0.311577062 | 3.551986573 | 0.212674509  | 0.999968961 | NA   |
| ASV_16s_36333 | 0.045427556 | 0.692466968 | 3.551989252 | 0.169323149  | 0.999985786 | NA   |
| ASV_16s_36334 | 0.045427556 | 0.692466968 | 3.551989252 | 0.169323149  | 0.999985786 | NA   |
| ASV_16s_36335 | 0.045427556 | 0.692466968 | 3.551989252 | 0.169323149  | 0.999985786 | NA   |
| ASV_16s_36336 | 0.045427556 | 0.692466968 | 3.551989252 | 0.169323149  | 0.999985786 | NA   |
| ASV_16s_36337 | 0.045427556 | 0.692466968 | 3.551989252 | 0.169323149  | 0.999985786 | NA   |
| ASV_16s_36338 | 0.045427556 | 0.692466968 | 3.551989252 | 0.169323149  | 0.999985786 | NA   |
| ASV_16s_36339 | 0.045427556 | 0.692466968 | 3.551989252 | 0.169323149  | 0.999985786 | NA   |
| ASV_16s_36340 | 0.045427556 | 0.692466968 | 3.551989252 | 0.169323149  | 0.999985786 | NA   |
| ASV_16s_36341 | 0.045427556 | 0.692466968 | 3.551989252 | 0.169323149  | 0.999985786 | NA   |
| ASV_16s_36342 | 0.041391235 | 0.688751725 | 3.551991209 | 0.158207719  | 0.999988744 | NA   |
| ASV_16s_36343 | 0.036182845 | 0.679127351 | 3.551996337 | 0.144934753  | 0.999991674 | NA   |
| ASV_16s_36344 | 0.036182845 | 0.679127351 | 3.551996337 | 0.144934753  | 0.999991674 | NA   |
| ASV_16s_36345 | 0.036182845 | 0.679127351 | 3.551996337 | 0.144934753  | 0.999991674 | NA   |
| ASV_16s_36346 | 0.036182845 | 0.679127351 | 3.551996337 | 0.144934753  | 0.999991674 | NA   |
| ASV_16s_36347 | 0.036182845 | 0.679127351 | 3.551996337 | 0.144934753  | 0.999991674 | NA   |
| ASV_16s_36348 | 0.038967035 | 0.70434392  | 3.551932577 | 0.076057955  | 0.999999105 | NA   |
| ASV_16s_36349 | 0.037061896 | 0.684717907 | 3.551993348 | 0.146532019  | 0.999991354 | NA   |
| ASV_16s_36350 | 0.038641419 | 0.692466968 | 3.551989252 | 0.14987826   | 0.999990655 | NA   |
| ASV_16s_36351 | 0.038641419 | 0.692466968 | 3.551989252 | 0.14987826   | 0.999990655 | NA   |
| ASV_16s_36352 | 0.040713858 | 0.692466968 | 3.551989252 | 0.155826631  | 0.999989316 | NA   |
| ASV_16s_36353 | 0.040713858 | 0.692466968 | 3.551989252 | 0.155826631  | 0.999989316 | NA   |
| ASV_16s_36354 | 0.040713858 | 0.692466968 | 3.551989252 | 0.155826631  | 0.999989316 | NA   |
| ASV_16s_36355 | 0.040713858 | 0.692466968 | 3.551989252 | 0.155826631  | 0.999989316 | NA   |
| ASV_16s_36356 | 0.040713858 | 0.692466968 | 3.551989252 | 0.155826631  | 0.999989316 | NA   |
| ASV_16s_36357 | 0.040713858 | 0.692466968 | 3.551989252 | 0.155826631  | 0.999989316 | NA   |
| ASV_16s_36358 | 0.040713858 | 0.692466968 | 3.551989252 | 0.155826631  | 0.999989316 | NA   |
| ASV_16s_36359 | 0.040713858 | 0.692466968 | 3.551989252 | 0.155826631  | 0.999989316 | NA   |
| ASV_16s_36360 | 0.040713858 | 0.692466968 | 3.551989252 | 0.155826631  | 0.999989316 | NA   |
| ASV_16s_36361 | 0.040713858 | 0.692466968 | 3.551989252 | 0.155826631  | 0.999989316 | NA   |
| ASV_16s_36362 | 0.040713858 | 0.692466968 | 3.551989252 | 0.155826631  | 0.999989316 | NA   |
| ASV_16s_36363 | 0.040713858 | 0.692466968 | 3.551989252 | 0.155826631  | 0.999989316 | NA   |



|               |             |              |             |             |                |
|---------------|-------------|--------------|-------------|-------------|----------------|
| ASV_16s_36431 | 0.064434135 | 0.323343579  | 3.552033668 | 0.247127316 | 0.999948199 NA |
| ASV_16s_36432 | 0.064434135 | 0.323343579  | 3.552033668 | 0.247127316 | 0.999948199 NA |
| ASV_16s_36433 | 0.064434135 | 0.323343579  | 3.552033668 | 0.247127316 | 0.999948199 NA |
| ASV_16s_36434 | 0.063294575 | 0.323343579  | 3.552033668 | 0.243474931 | 0.99995076 NA  |
| ASV_16s_36435 | 0.063294575 | 0.323343579  | 3.552033668 | 0.243474931 | 0.99995076 NA  |
| ASV_16s_36436 | 0.063294575 | 0.323343579  | 3.552033668 | 0.243474931 | 0.99995076 NA  |
| ASV_16s_36437 | 0.063294575 | 0.323343579  | 3.552033668 | 0.243474931 | 0.99995076 NA  |
| ASV_16s_36438 | 0.063294575 | 0.323343579  | 3.552033668 | 0.243474931 | 0.99995076 NA  |
| ASV_16s_36439 | 0.063294575 | 0.323343579  | 3.552033668 | 0.243474931 | 0.99995076 NA  |
| ASV_16s_36440 | 0.044176825 | 0.323343579  | 3.552033668 | 0.18169187  | 0.999981895 NA |
| ASV_16s_36441 | 0.04777117  | -0.057802697 | 3.551945827 | 0.196566051 | 0.999976292 NA |
| ASV_16s_36442 | 0.04777117  | -0.057802697 | 3.551945827 | 0.196566051 | 0.999976292 NA |
| ASV_16s_36443 | 0.04777117  | -0.057802697 | 3.551945827 | 0.196566051 | 0.999976292 NA |
| ASV_16s_36444 | 0.045920146 | -0.057802697 | 3.551945827 | 0.190884134 | 0.999978558 NA |
| ASV_16s_36445 | 0.045920146 | -0.057802697 | 3.551945827 | 0.190884134 | 0.999978558 NA |
| ASV_16s_36446 | 0.045920146 | -0.057802697 | 3.551945827 | 0.190884134 | 0.999978558 NA |
| ASV_16s_36447 | 0.054023155 | 0.186113486  | 3.551979419 | 0.109635279 | 0.999996823 NA |
| ASV_16s_36448 | 0.076632854 | -0.057802697 | 3.551945827 | 0.284008663 | 0.999916903 NA |
| ASV_16s_36449 | 0.076632854 | -0.057802697 | 3.551945827 | 0.284008663 | 0.999916903 NA |
| ASV_16s_36450 | 0.076632854 | -0.057802697 | 3.551945827 | 0.284008663 | 0.999916903 NA |
| ASV_16s_36451 | 0.076632854 | -0.057802697 | 3.551945827 | 0.284008663 | 0.999916903 NA |
| ASV_16s_36452 | 0.039456259 | -0.057802697 | 3.551945827 | 0.170971592 | 0.999985305 NA |
| ASV_16s_36453 | 0.027409158 | -0.031506671 | 3.551954892 | 0.138375764 | 0.999992902 NA |
| ASV_16s_36454 | 0.040321402 | -0.057802696 | 3.551945827 | 0.17364315  | 0.999984502 NA |
| ASV_16s_36455 | 0.040321402 | -0.057802696 | 3.551945827 | 0.17364315  | 0.999984502 NA |
| ASV_16s_36456 | 0.040321402 | -0.057802696 | 3.551945827 | 0.17364315  | 0.999984502 NA |
| ASV_16s_36457 | 0.040321402 | -0.057802696 | 3.551945827 | 0.17364315  | 0.999984502 NA |
| ASV_16s_36458 | 0.040321402 | -0.057802696 | 3.551945827 | 0.17364315  | 0.999984502 NA |
| ASV_16s_36459 | 0.035876848 | -0.057802696 | 3.551945827 | 0.159897215 | 0.999988326 NA |
| ASV_16s_36460 | 0.035876848 | -0.057802696 | 3.551945827 | 0.159897215 | 0.999988326 NA |
| ASV_16s_36461 | 0.035876848 | -0.057802696 | 3.551945827 | 0.159897215 | 0.999988326 NA |
| ASV_16s_36462 | 0.035876848 | -0.057802696 | 3.551945827 | 0.159897215 | 0.999988326 NA |
| ASV_16s_36463 | 0.037662111 | 0.226085699  | 3.55196616  | 0.096539468 | 0.999997954 NA |
| ASV_16s_36464 | 0.049433381 | 0.692466968  | 3.551989252 | 0.180757096 | 0.999982213 NA |
| ASV_16s_36465 | 0.049433381 | 0.692466968  | 3.551989252 | 0.180757096 | 0.999982213 NA |
| ASV_16s_36466 | 0.049433381 | 0.692466968  | 3.551989252 | 0.180757096 | 0.999982213 NA |
| ASV_16s_36467 | 0.049433381 | 0.692466968  | 3.551989252 | 0.180757096 | 0.999982213 NA |
| ASV_16s_36468 | 0.049433381 | 0.692466968  | 3.551989252 | 0.180757096 | 0.999982213 NA |
| ASV_16s_36469 | 0.049433381 | 0.692466968  | 3.551989252 | 0.180757096 | 0.999982213 NA |
| ASV_16s_36470 | 0.075472417 | 0.692466969  | 3.551989252 | 0.254290472 | 0.999942909 NA |
| ASV_16s_36471 | 0.054078363 | 0.692466968  | 3.551989252 | 0.193974486 | 0.999977345 NA |
| ASV_16s_36472 | 0.054078363 | 0.692466968  | 3.551989252 | 0.193974486 | 0.999977345 NA |
| ASV_16s_36473 | 0.054078363 | 0.692466968  | 3.551989252 | 0.193974486 | 0.999977345 NA |
| ASV_16s_36474 | 0.054078363 | 0.692466968  | 3.551989252 | 0.193974486 | 0.999977345 NA |
| ASV_16s_36475 | 0.054078363 | 0.692466968  | 3.551989252 | 0.193974486 | 0.999977345 NA |
| ASV_16s_36476 | 0.054078363 | 0.692466968  | 3.551989252 | 0.193974486 | 0.999977345 NA |
| ASV_16s_36477 | 0.054078363 | 0.692466968  | 3.551989252 | 0.193974486 | 0.999977345 NA |
| ASV_16s_36478 | 0.054078363 | 0.692466968  | 3.551989252 | 0.193974486 | 0.999977345 NA |
| ASV_16s_36479 | 0.05244362  | 0.694370733  | 3.551981132 | 0.126797653 | 0.999994749 NA |
| ASV_16s_36480 | 0.040637549 | 0.717718829  | 3.551857782 | 0.111986137 | 0.999996581 NA |
| ASV_16s_36481 | 0.040637549 | 0.717718829  | 3.551857782 | 0.111986137 | 0.999996581 NA |
| ASV_16s_36482 | 0.040637549 | 0.717718829  | 3.551857782 | 0.111986137 | 0.999996581 NA |
| ASV_16s_36483 | 0.040637549 | 0.717718829  | 3.551857782 | 0.111986137 | 0.999996581 NA |
| ASV_16s_36484 | 0.021208886 | 0.619247974  | 3.551920142 | 0.085319236 | 0.999998666 NA |
| ASV_16s_36485 | 0.058293809 | 0.717718829  | 3.551857782 | 0.15118541  | 0.999990372 NA |
| ASV_16s_36486 | 0.058293809 | 0.717718829  | 3.551857782 | 0.15118541  | 0.999990372 NA |
| ASV_16s_36487 | 0.036359502 | 0.717718829  | 3.551857782 | 0.102409342 | 0.99999749 NA  |
| ASV_16s_36488 | 0.036359502 | 0.717718829  | 3.551857782 | 0.102409342 | 0.99999749 NA  |
| ASV_16s_36489 | 0.050113182 | 0.717718829  | 3.551857782 | 0.133088199 | 0.999993794 NA |
| ASV_16s_36490 | 0.050113182 | 0.717718829  | 3.551857782 | 0.133088199 | 0.999993794 NA |
| ASV_16s_36491 | 0.050113182 | 0.717718829  | 3.551857782 | 0.133088199 | 0.999993794 NA |
| ASV_16s_36492 | 0.050113182 | 0.717718829  | 3.551857782 | 0.133088199 | 0.999993794 NA |
| ASV_16s_36493 | 0.050113182 | 0.717718829  | 3.551857782 | 0.133088199 | 0.999993794 NA |
| ASV_16s_36494 | 0.050113182 | 0.717718829  | 3.551857782 | 0.133088199 | 0.999993794 NA |
| ASV_16s_36495 | 0.042650126 | 0.335458967  | 3.551957954 | 0.128759762 | 0.999994463 NA |
| ASV_16s_36496 | 0.042650126 | 0.335458967  | 3.551957954 | 0.128759762 | 0.999994463 NA |
| ASV_16s_36497 | 0.056530674 | 0.335458967  | 3.551957954 | 0.161461609 | 0.999987928 NA |











|               |             |              |             |             |                |
|---------------|-------------|--------------|-------------|-------------|----------------|
| ASV_16s_36766 | 0.042775771 | 0.650227954  | 3.551851715 | 0.216508789 | 0.999967006 NA |
| ASV_16s_36767 | 0.070857267 | 0.126924397  | 3.551967331 | 0.21335903  | 0.999968618 NA |
| ASV_16s_36768 | 0.037784684 | 0.08683186   | 3.551986715 | 0.162145981 | 0.999987752 NA |
| ASV_16s_36769 | 0.033947268 | -0.05899684  | 3.551938366 | 0.139769411 | 0.999992653 NA |
| ASV_16s_36770 | 0.039829392 | 0.323277309  | 3.552033363 | 0.15147235  | 0.999990309 NA |
| ASV_16s_36771 | 0.038594432 | 0.456713424  | 3.551987435 | 0.163799666 | 0.999987317 NA |
| ASV_16s_36772 | 0.045441753 | 0.524184921  | 3.551934511 | 0.149335013 | 0.999990771 NA |
| ASV_16s_36773 | 0.05844751  | 0.072536358  | 3.551931653 | 0.261895023 | 0.999936892 NA |
| ASV_16s_36774 | 0.034920408 | 0.498731643  | 3.551949438 | 0.146288158 | 0.999991404 NA |
| ASV_16s_36775 | 0.060016578 | 0.394906773  | 3.551956168 | 0.174235907 | 0.99998432 NA  |
| ASV_16s_36776 | 0.036841924 | 0.335359694  | 3.55196873  | 0.188095474 | 0.999979612 NA |
| ASV_16s_36777 | 0.040665387 | 0.32263083   | 3.552029416 | 0.176041374 | 0.999983755 NA |
| ASV_16s_36778 | 0.044345216 | 0.678839465  | 3.551955164 | 0.165570327 | 0.999986839 NA |
| ASV_16s_36779 | 0.044345216 | 0.678839465  | 3.551955164 | 0.165570327 | 0.999986839 NA |
| ASV_16s_36780 | 0.044345216 | 0.678839465  | 3.551955164 | 0.165570327 | 0.999986839 NA |
| ASV_16s_36781 | 0.044345216 | 0.678839465  | 3.551955164 | 0.165570327 | 0.999986839 NA |
| ASV_16s_36782 | 0.080126373 | 0.678839466  | 3.551955164 | 0.269810548 | 0.999930175 NA |
| ASV_16s_36783 | 0.080126373 | 0.678839466  | 3.551955164 | 0.269810548 | 0.999930175 NA |
| ASV_16s_36784 | 0.080126373 | 0.678839466  | 3.551955164 | 0.269810548 | 0.999930175 NA |
| ASV_16s_36785 | 0.049433381 | 0.311577062  | 3.551986573 | 0.199146178 | 0.999975209 NA |
| ASV_16s_36786 | 0.049433381 | 0.311577062  | 3.551986573 | 0.199146178 | 0.999975209 NA |
| ASV_16s_36787 | 0.049433381 | 0.311577062  | 3.551986573 | 0.199146178 | 0.999975209 NA |
| ASV_16s_36788 | 0.049433381 | 0.311577062  | 3.551986573 | 0.199146178 | 0.999975209 NA |
| ASV_16s_36789 | 0.060316314 | -0.071826264 | 3.551897789 | 0.242352589 | 0.999951528 NA |
| ASV_16s_36790 | 0.060316314 | -0.071826264 | 3.551897789 | 0.242352589 | 0.999951528 NA |
| ASV_16s_36791 | 0.059805284 | 0.678839466  | 3.551955164 | 0.210932986 | 0.999969821 NA |
| ASV_16s_36792 | 0.059805284 | 0.678839466  | 3.551955164 | 0.210932986 | 0.999969821 NA |
| ASV_16s_36793 | 0.059805284 | 0.678839466  | 3.551955164 | 0.210932986 | 0.999969821 NA |
| ASV_16s_36794 | 0.041948702 | 0.678839465  | 3.551955164 | 0.158493872 | 0.999988674 NA |
| ASV_16s_36795 | 0.041948702 | 0.678839465  | 3.551955164 | 0.158493872 | 0.999988674 NA |
| ASV_16s_36796 | 0.041948702 | 0.678839465  | 3.551955164 | 0.158493872 | 0.999988674 NA |
| ASV_16s_36797 | 0.041948702 | 0.678839465  | 3.551955164 | 0.158493872 | 0.999988674 NA |
| ASV_16s_36798 | 0.053530508 | 0.678839466  | 3.551955164 | 0.19258153  | 0.999977898 NA |
| ASV_16s_36799 | 0.090765803 | 0.67205541   | 3.551866813 | 0.303696267 | 0.999895731 NA |
| ASV_16s_36800 | 0.090765803 | 0.67205541   | 3.551866813 | 0.303696267 | 0.999895731 NA |
| ASV_16s_36801 | 0.063969094 | 0.67205541   | 3.551866813 | 0.216859141 | 0.999966824 NA |
| ASV_16s_36802 | 0.063969094 | 0.67205541   | 3.551866813 | 0.216859141 | 0.999966824 NA |
| ASV_16s_36803 | 0.041381288 | 0.664557837  | 3.551875055 | 0.144321668 | 0.999991795 NA |
| ASV_16s_36804 | 0.041381288 | 0.664557837  | 3.551875055 | 0.144321668 | 0.999991795 NA |
| ASV_16s_36805 | 0.079827006 | 0.67205541   | 3.551866813 | 0.268438922 | 0.999931373 NA |
| ASV_16s_36806 | 0.040412352 | 0.659601101  | 3.551880571 | 0.142439495 | 0.999992158 NA |
| ASV_16s_36807 | 0.028464435 | 0.299929099  | 3.551954019 | 0.133004878 | 0.999993808 NA |
| ASV_16s_36808 | 0.06417564  | 0.296721178  | 3.551930503 | 0.25906731  | 0.999939179 NA |
| ASV_16s_36809 | 0.06417564  | 0.296721178  | 3.551930503 | 0.25906731  | 0.999939179 NA |
| ASV_16s_36810 | 0.06417564  | 0.296721178  | 3.551930503 | 0.25906731  | 0.999939179 NA |
| ASV_16s_36811 | 0.06417564  | 0.296721178  | 3.551930503 | 0.25906731  | 0.999939179 NA |
| ASV_16s_36812 | 0.06417564  | 0.296721178  | 3.551930503 | 0.25906731  | 0.999939179 NA |
| ASV_16s_36813 | 0.019622404 | 0.303826838  | 3.551963716 | 0.123730116 | 0.999995174 NA |
| ASV_16s_36814 | 0.057765829 | 0.296721178  | 3.551930503 | 0.232799373 | 0.999957737 NA |
| ASV_16s_36815 | 0.057765829 | 0.296721178  | 3.551930503 | 0.232799373 | 0.999957737 NA |
| ASV_16s_36816 | 0.02266042  | 0.302380252  | 3.551959984 | 0.12606698  | 0.999994853 NA |
| ASV_16s_36817 | 0.053530508 | -0.089757465 | 3.551837252 | 0.218178702 | 0.999966129 NA |
| ASV_16s_36818 | 0.053530508 | -0.089757465 | 3.551837252 | 0.218178702 | 0.999966129 NA |
| ASV_16s_36819 | 0.053530508 | -0.089757465 | 3.551837252 | 0.218178702 | 0.999966129 NA |
| ASV_16s_36820 | 0.053530508 | -0.089757465 | 3.551837252 | 0.218178702 | 0.999966129 NA |
| ASV_16s_36821 | 0.072265441 | -0.089757465 | 3.551837252 | 0.288656174 | 0.999912204 NA |
| ASV_16s_36822 | 0.072265441 | -0.089757465 | 3.551837252 | 0.288656174 | 0.999912204 NA |
| ASV_16s_36823 | 0.093830306 | -0.089757465 | 3.551837252 | 0.36847963  | 0.999799922 NA |
| ASV_16s_36824 | 0.091509333 | 0.67205541   | 3.551866813 | 0.306083309 | 0.999892933 NA |
| ASV_16s_36825 | 0.083201986 | 0.67205541   | 3.551866813 | 0.279344868 | 0.999921441 NA |
| ASV_16s_36826 | 0.083201986 | 0.67205541   | 3.551866813 | 0.279344868 | 0.999921441 NA |
| ASV_16s_36827 | 0.073729883 | -0.057802697 | 3.551945827 | 0.275310209 | 0.999925224 NA |
| ASV_16s_36828 | 0.073729883 | -0.057802697 | 3.551945827 | 0.275310209 | 0.999925224 NA |
| ASV_16s_36829 | 0.073729883 | -0.057802697 | 3.551945827 | 0.275310209 | 0.999925224 NA |
| ASV_16s_36830 | 0.073729883 | -0.057802697 | 3.551945827 | 0.275310209 | 0.999925224 NA |
| ASV_16s_36831 | 0.073729883 | -0.057802697 | 3.551945827 | 0.275310209 | 0.999925224 NA |
| ASV_16s_36832 | 0.073729883 | -0.057802697 | 3.551945827 | 0.275310209 | 0.999925224 NA |













































|               |             |              |             |             |             |    |
|---------------|-------------|--------------|-------------|-------------|-------------|----|
| ASV_16s_38181 | 0.040180127 | 0.640757308  | 3.551880192 | 0.19424105  | 0.999977238 | NA |
| ASV_16s_38182 | 0.040180127 | 0.640757308  | 3.551880192 | 0.19424105  | 0.999977238 | NA |
| ASV_16s_38183 | 0.040180127 | 0.640757308  | 3.551880192 | 0.19424105  | 0.999977238 | NA |
| ASV_16s_38184 | 0.040180127 | 0.640757308  | 3.551880192 | 0.19424105  | 0.999977238 | NA |
| ASV_16s_38185 | 0.040180127 | 0.640757308  | 3.551880192 | 0.19424105  | 0.999977238 | NA |
| ASV_16s_38186 | 0.040180127 | 0.640757308  | 3.551880192 | 0.19424105  | 0.999977238 | NA |
| ASV_16s_38187 | 0.040180127 | 0.640757308  | 3.551880192 | 0.19424105  | 0.999977238 | NA |
| ASV_16s_38188 | 0.040180127 | 0.640757308  | 3.551880192 | 0.19424105  | 0.999977238 | NA |
| ASV_16s_38189 | 0.040180127 | 0.640757308  | 3.551880192 | 0.19424105  | 0.999977238 | NA |
| ASV_16s_38190 | 0.035245343 | 0.618646134  | 3.551943656 | 0.175453426 | 0.99998394  | NA |
| ASV_16s_38191 | 0.031544255 | 0.606280108  | 3.551967313 | 0.162602862 | 0.999987632 | NA |
| ASV_16s_38192 | 0.031544255 | 0.606280108  | 3.551967313 | 0.162602862 | 0.999987632 | NA |
| ASV_16s_38193 | 0.031544255 | 0.606280108  | 3.551967313 | 0.162602862 | 0.999987632 | NA |
| ASV_16s_38194 | 0.042491661 | 0.220799102  | 3.55198165  | 0.134867762 | 0.999993503 | NA |
| ASV_16s_38195 | 0.038082978 | 0.078876099  | 3.551957451 | 0.120902359 | 0.999995545 | NA |
| ASV_16s_38196 | 0.03895362  | 0.078876099  | 3.551957451 | 0.123126862 | 0.999995255 | NA |
| ASV_16s_38197 | 0.034272238 | 0.452314223  | 3.552005539 | 0.121688253 | 0.999995444 | NA |
| ASV_16s_38198 | 0.031540642 | 0.316798166  | 3.552004401 | 0.109158917 | 0.99999687  | NA |
| ASV_16s_38199 | 0.038340367 | 0.127634736  | 3.551970089 | 0.120385539 | 0.99999561  | NA |
| ASV_16s_38200 | 0.044882746 | 0.129483216  | 3.55195966  | 0.088922593 | 0.999998461 | NA |
| ASV_16s_38201 | 0.038236249 | 0.267115901  | 3.551948352 | 0.08709626  | 0.999998568 | NA |
| ASV_16s_38202 | 0.032643033 | 0.134316139  | 3.551933988 | 0.145040668 | 0.999991653 | NA |
| ASV_16s_38203 | 0.056647201 | 0.355837763  | 3.551977449 | 0.15054178  | 0.999990512 | NA |
| ASV_16s_38204 | 0.03362675  | 0.499291252  | 3.552009301 | 0.112714148 | 0.999996503 | NA |
| ASV_16s_38205 | 0.037204728 | 0.176391785  | 3.551983628 | 0.126600346 | 0.999994777 | NA |
| ASV_16s_38206 | 0.040180127 | -0.012850111 | 3.551951579 | 0.112662122 | 0.999996509 | NA |
| ASV_16s_38207 | 0.036953957 | 0.357292922  | 3.551982694 | 0.14164919  | 0.999992307 | NA |
| ASV_16s_38208 | 0.032792831 | 0.22514711   | 3.551998148 | 0.097089085 | 0.999997913 | NA |
| ASV_16s_38209 | 0.041542313 | 0.453667322  | 3.551982434 | 0.164745041 | 0.999987064 | NA |
| ASV_16s_38210 | 0.03751493  | 0.633443729  | 3.551962276 | 0.14007731  | 0.999992597 | NA |
| ASV_16s_38211 | 0.03751493  | 0.633443729  | 3.551962276 | 0.14007731  | 0.999992597 | NA |
| ASV_16s_38212 | 0.03751493  | 0.633443729  | 3.551962276 | 0.14007731  | 0.999992597 | NA |
| ASV_16s_38213 | 0.03751493  | 0.633443729  | 3.551962276 | 0.14007731  | 0.999992597 | NA |
| ASV_16s_38214 | 0.03751493  | 0.633443729  | 3.551962276 | 0.14007731  | 0.999992597 | NA |
| ASV_16s_38215 | 0.03751493  | 0.633443729  | 3.551962276 | 0.14007731  | 0.999992597 | NA |
| ASV_16s_38216 | 0.03751493  | 0.633443729  | 3.551962276 | 0.14007731  | 0.999992597 | NA |
| ASV_16s_38217 | 0.048416231 | 0.312385008  | 3.551988626 | 0.188393169 | 0.999979502 | NA |
| ASV_16s_38218 | 0.048416231 | 0.312385008  | 3.551988626 | 0.188393169 | 0.999979502 | NA |
| ASV_16s_38219 | 0.048416231 | 0.312385008  | 3.551988626 | 0.188393169 | 0.999979502 | NA |
| ASV_16s_38220 | 0.048416231 | 0.312385008  | 3.551988626 | 0.188393169 | 0.999979502 | NA |
| ASV_16s_38221 | 0.048416231 | 0.312385008  | 3.551988626 | 0.188393169 | 0.999979502 | NA |
| ASV_16s_38222 | 0.048416231 | 0.312385008  | 3.551988626 | 0.188393169 | 0.999979502 | NA |
| ASV_16s_38223 | 0.038320905 | 0.312385008  | 3.551988626 | 0.155844428 | 0.999989312 | NA |
| ASV_16s_38224 | 0.051392371 | 0.312385008  | 3.551988626 | 0.197927673 | 0.999975725 | NA |
| ASV_16s_38225 | 0.051392371 | 0.312385008  | 3.551988626 | 0.197927673 | 0.999975725 | NA |
| ASV_16s_38226 | 0.064239049 | 0.312385008  | 3.551988626 | 0.238769273 | 0.999953927 | NA |
| ASV_16s_38227 | 0.039749112 | 0.643679874  | 3.5520029   | 0.146709809 | 0.999991318 | NA |
| ASV_16s_38228 | 0.039749112 | 0.643679874  | 3.5520029   | 0.146709809 | 0.999991318 | NA |
| ASV_16s_38229 | 0.039749112 | 0.643679874  | 3.5520029   | 0.146709809 | 0.999991318 | NA |
| ASV_16s_38230 | 0.039749112 | 0.643679874  | 3.5520029   | 0.146709809 | 0.999991318 | NA |
| ASV_16s_38231 | 0.039749112 | 0.643679874  | 3.5520029   | 0.146709809 | 0.999991318 | NA |
| ASV_16s_38232 | 0.039749112 | 0.643679874  | 3.5520029   | 0.146709809 | 0.999991318 | NA |
| ASV_16s_38233 | 0.039749112 | 0.643679874  | 3.5520029   | 0.146709809 | 0.999991318 | NA |
| ASV_16s_38234 | 0.039749112 | 0.643679874  | 3.5520029   | 0.146709809 | 0.999991318 | NA |
| ASV_16s_38235 | 0.031659989 | 0.643679874  | 3.5520029   | 0.124655451 | 0.999995049 | NA |
| ASV_16s_38236 | 0.031659989 | 0.643679874  | 3.5520029   | 0.124655451 | 0.999995049 | NA |
| ASV_16s_38237 | 0.031659989 | 0.643679874  | 3.5520029   | 0.124655451 | 0.999995049 | NA |
| ASV_16s_38238 | 0.031659989 | 0.643679874  | 3.5520029   | 0.124655451 | 0.999995049 | NA |
| ASV_16s_38239 | 0.031659989 | 0.643679874  | 3.5520029   | 0.124655451 | 0.999995049 | NA |
| ASV_16s_38240 | 0.033811242 | 0.643679874  | 3.5520029   | 0.130535726 | 0.999994195 | NA |
| ASV_16s_38241 | 0.033811242 | 0.643679874  | 3.5520029   | 0.130535726 | 0.999994195 | NA |
| ASV_16s_38242 | 0.033811242 | 0.643679874  | 3.5520029   | 0.130535726 | 0.999994195 | NA |
| ASV_16s_38243 | 0.035624626 | 0.643679874  | 3.5520029   | 0.135483977 | 0.999993401 | NA |
| ASV_16s_38244 | 0.035624626 | 0.643679874  | 3.5520029   | 0.135483977 | 0.999993401 | NA |
| ASV_16s_38245 | 0.035624626 | 0.643679874  | 3.5520029   | 0.135483977 | 0.999993401 | NA |
| ASV_16s_38246 | 0.035624626 | 0.643679874  | 3.5520029   | 0.135483977 | 0.999993401 | NA |
| ASV_16s_38247 | 0.035624626 | 0.643679874  | 3.5520029   | 0.135483977 | 0.999993401 | NA |





|               |             |              |             |             |             |    |
|---------------|-------------|--------------|-------------|-------------|-------------|----|
| ASV_16s_38315 | 0.054352799 | 0.322622502  | 3.552030359 | 0.205334523 | 0.999972473 | NA |
| ASV_16s_38316 | 0.024013962 | 0.32229332   | 3.55202886  | 0.116269235 | 0.999996107 | NA |
| ASV_16s_38317 | 0.024013962 | 0.32229332   | 3.55202886  | 0.116269235 | 0.999996107 | NA |
| ASV_16s_38318 | 0.024013962 | 0.32229332   | 3.55202886  | 0.116269235 | 0.999996107 | NA |
| ASV_16s_38319 | 0.024013962 | 0.32229332   | 3.55202886  | 0.116269235 | 0.999996107 | NA |
| ASV_16s_38320 | 0.024013962 | 0.32229332   | 3.55202886  | 0.116269235 | 0.999996107 | NA |
| ASV_16s_38321 | 0.032515441 | 0.322622502  | 3.552030359 | 0.138011296 | 0.999992966 | NA |
| ASV_16s_38322 | 0.032515441 | 0.322622502  | 3.552030359 | 0.138011296 | 0.999992966 | NA |
| ASV_16s_38323 | 0.032515441 | 0.322622502  | 3.552030359 | 0.138011296 | 0.999992966 | NA |
| ASV_16s_38324 | 0.043646575 | 0.322622502  | 3.552030359 | 0.172509088 | 0.999984847 | NA |
| ASV_16s_38325 | 0.056379868 | 0.322622502  | 3.552030359 | 0.211510769 | 0.999969537 | NA |
| ASV_16s_38326 | 0.056379868 | 0.322622502  | 3.552030359 | 0.211510769 | 0.999969537 | NA |
| ASV_16s_38327 | 0.055382753 | 0.322622502  | 3.552030359 | 0.208474207 | 0.999971007 | NA |
| ASV_16s_38328 | 0.055382753 | 0.322622502  | 3.552030359 | 0.208474207 | 0.999971007 | NA |
| ASV_16s_38329 | 0.055382753 | 0.322622502  | 3.552030359 | 0.208474207 | 0.999971007 | NA |
| ASV_16s_38330 | 0.055382753 | 0.322622502  | 3.552030359 | 0.208474207 | 0.999971007 | NA |
| ASV_16s_38331 | 0.055382753 | 0.322622502  | 3.552030359 | 0.208474207 | 0.999971007 | NA |
| ASV_16s_38332 | 0.055382753 | 0.322622502  | 3.552030359 | 0.208474207 | 0.999971007 | NA |
| ASV_16s_38333 | 0.055382753 | 0.322622502  | 3.552030359 | 0.208474207 | 0.999971007 | NA |
| ASV_16s_38334 | 0.038654722 | 0.322622502  | 3.552030359 | 0.157085219 | 0.999989017 | NA |
| ASV_16s_38335 | 0.038654722 | 0.322622502  | 3.552030359 | 0.157085219 | 0.999989017 | NA |
| ASV_16s_38336 | 0.038654722 | 0.322622502  | 3.552030359 | 0.157085219 | 0.999989017 | NA |
| ASV_16s_38337 | 0.038654722 | 0.322622502  | 3.552030359 | 0.157085219 | 0.999989017 | NA |
| ASV_16s_38338 | 0.046375878 | 0.327547384  | 3.552003537 | 0.088651046 | 0.999998477 | NA |
| ASV_16s_38339 | 0.045834934 | 0.322622502  | 3.552030359 | 0.179246778 | 0.999982717 | NA |
| ASV_16s_38340 | 0.045834934 | 0.322622502  | 3.552030359 | 0.179246778 | 0.999982717 | NA |
| ASV_16s_38341 | 0.054118123 | -0.009233616 | 3.55196282  | 0.204619759 | 0.999972799 | NA |
| ASV_16s_38342 | 0.041799774 | -0.009233616 | 3.55196282  | 0.169141852 | 0.999985838 | NA |
| ASV_16s_38343 | 0.041799774 | -0.009233616 | 3.55196282  | 0.169141852 | 0.999985838 | NA |
| ASV_16s_38344 | 0.040180127 | -0.009233616 | 3.55196282  | 0.164443483 | 0.999987145 | NA |
| ASV_16s_38345 | 0.040180127 | -0.009233616 | 3.55196282  | 0.164443483 | 0.999987145 | NA |
| ASV_16s_38346 | 0.040180127 | -0.009233616 | 3.55196282  | 0.164443483 | 0.999987145 | NA |
| ASV_16s_38347 | 0.040180127 | -0.009233616 | 3.55196282  | 0.164443483 | 0.999987145 | NA |
| ASV_16s_38348 | 0.040180127 | -0.009233616 | 3.55196282  | 0.164443483 | 0.999987145 | NA |
| ASV_16s_38349 | 0.040180127 | -0.009233616 | 3.55196282  | 0.164443483 | 0.999987145 | NA |
| ASV_16s_38350 | 0.040180127 | -0.009233616 | 3.55196282  | 0.164443483 | 0.999987145 | NA |
| ASV_16s_38351 | 0.040180127 | -0.009233616 | 3.55196282  | 0.164443483 | 0.999987145 | NA |
| ASV_16s_38352 | 0.040180127 | -0.009233616 | 3.55196282  | 0.164443483 | 0.999987145 | NA |
| ASV_16s_38353 | 0.040180127 | -0.009233616 | 3.55196282  | 0.164443483 | 0.999987145 | NA |
| ASV_16s_38354 | 0.040180127 | -0.009233616 | 3.55196282  | 0.164443483 | 0.999987145 | NA |
| ASV_16s_38355 | 0.047988704 | -0.009233616 | 3.55196282  | 0.187022816 | 0.999980008 | NA |
| ASV_16s_38356 | 0.047988704 | -0.009233616 | 3.55196282  | 0.187022816 | 0.999980008 | NA |
| ASV_16s_38357 | 0.047988704 | -0.009233616 | 3.55196282  | 0.187022816 | 0.999980008 | NA |
| ASV_16s_38358 | 0.067053747 | -0.009233616 | 3.55196282  | 0.241395317 | 0.999952178 | NA |
| ASV_16s_38359 | 0.067053747 | -0.009233616 | 3.55196282  | 0.241395317 | 0.999952178 | NA |
| ASV_16s_38360 | 0.067053747 | -0.009233616 | 3.55196282  | 0.241395317 | 0.999952178 | NA |
| ASV_16s_38361 | 0.067053747 | -0.009233616 | 3.55196282  | 0.241395317 | 0.999952178 | NA |
| ASV_16s_38362 | 0.067053747 | -0.009233616 | 3.55196282  | 0.241395317 | 0.999952178 | NA |
| ASV_16s_38363 | 0.067053747 | -0.009233616 | 3.55196282  | 0.241395317 | 0.999952178 | NA |
| ASV_16s_38364 | 0.067053747 | -0.009233616 | 3.55196282  | 0.241395317 | 0.999952178 | NA |
| ASV_16s_38365 | 0.034524227 | -0.009233616 | 3.55196282  | 0.147974533 | 0.999991058 | NA |
| ASV_16s_38366 | 0.034524227 | -0.009233616 | 3.55196282  | 0.147974533 | 0.999991058 | NA |
| ASV_16s_38367 | 0.034524227 | -0.009233616 | 3.55196282  | 0.147974533 | 0.999991058 | NA |
| ASV_16s_38368 | 0.034524227 | -0.009233616 | 3.55196282  | 0.147974533 | 0.999991058 | NA |
| ASV_16s_38369 | 0.034524227 | -0.009233616 | 3.55196282  | 0.147974533 | 0.999991058 | NA |
| ASV_16s_38370 | 0.034524227 | -0.009233616 | 3.55196282  | 0.147974533 | 0.999991058 | NA |
| ASV_16s_38371 | 0.044680902 | -0.009233616 | 3.55196282  | 0.177480182 | 0.999983295 | NA |
| ASV_16s_38372 | 0.023983014 | -0.002640025 | 3.551965213 | 0.118335352 | 0.999995863 | NA |
| ASV_16s_38373 | 0.023983014 | -0.002640025 | 3.551965213 | 0.118335352 | 0.999995863 | NA |
| ASV_16s_38374 | 0.023983014 | -0.002640025 | 3.551965213 | 0.118335352 | 0.999995863 | NA |
| ASV_16s_38375 | 0.023983014 | -0.002640025 | 3.551965213 | 0.118335352 | 0.999995863 | NA |
| ASV_16s_38376 | 0.023983014 | -0.002640025 | 3.551965213 | 0.118335352 | 0.999995863 | NA |
| ASV_16s_38377 | 0.023983014 | -0.002640025 | 3.551965213 | 0.118335352 | 0.999995863 | NA |
| ASV_16s_38378 | 0.035281226 | -0.009233616 | 3.55196282  | 0.150184382 | 0.99999059  | NA |
| ASV_16s_38379 | 0.035281226 | -0.009233616 | 3.55196282  | 0.150184382 | 0.99999059  | NA |
| ASV_16s_38380 | 0.035281226 | -0.009233616 | 3.55196282  | 0.150184382 | 0.99999059  | NA |
| ASV_16s_38381 | 0.035281226 | -0.009233616 | 3.55196282  | 0.150184382 | 0.99999059  | NA |

|               |             |              |             |             |             |    |
|---------------|-------------|--------------|-------------|-------------|-------------|----|
| ASV_16s_38382 | 0.031392242 | -0.009233616 | 3.55196282  | 0.138813092 | 0.999992825 | NA |
| ASV_16s_38383 | 0.031392242 | -0.009233616 | 3.55196282  | 0.138813092 | 0.999992825 | NA |
| ASV_16s_38384 | 0.031392242 | -0.009233616 | 3.55196282  | 0.138813092 | 0.999992825 | NA |
| ASV_16s_38385 | 0.031392242 | -0.009233616 | 3.55196282  | 0.138813092 | 0.999992825 | NA |
| ASV_16s_38386 | 0.031392242 | -0.009233616 | 3.55196282  | 0.138813092 | 0.999992825 | NA |
| ASV_16s_38387 | 0.031392242 | -0.009233616 | 3.55196282  | 0.138813092 | 0.999992825 | NA |
| ASV_16s_38388 | 0.031392242 | -0.009233616 | 3.55196282  | 0.138813092 | 0.999992825 | NA |
| ASV_16s_38389 | 0.031392242 | -0.009233616 | 3.55196282  | 0.138813092 | 0.999992825 | NA |
| ASV_16s_38390 | 0.033578339 | 0.133420465  | 3.551992629 | 0.108927566 | 0.999996893 | NA |
| ASV_16s_38391 | 0.046597633 | 0.643679874  | 3.5520029   | 0.165261876 | 0.999986924 | NA |
| ASV_16s_38392 | 0.043254208 | 0.643679874  | 3.5520029   | 0.156218483 | 0.999989224 | NA |
| ASV_16s_38393 | 0.043254208 | 0.643679874  | 3.5520029   | 0.156218483 | 0.999989224 | NA |
| ASV_16s_38394 | 0.043254208 | 0.643679874  | 3.5520029   | 0.156218483 | 0.999989224 | NA |
| ASV_16s_38395 | 0.043254208 | 0.643679874  | 3.5520029   | 0.156218483 | 0.999989224 | NA |
| ASV_16s_38396 | 0.043254208 | 0.643679874  | 3.5520029   | 0.156218483 | 0.999989224 | NA |
| ASV_16s_38397 | 0.043254208 | 0.643679874  | 3.5520029   | 0.156218483 | 0.999989224 | NA |
| ASV_16s_38398 | 0.043254208 | 0.643679874  | 3.5520029   | 0.156218483 | 0.999989224 | NA |
| ASV_16s_38399 | 0.047318568 | 0.643679874  | 3.5520029   | 0.167208476 | 0.999986387 | NA |
| ASV_16s_38400 | 0.035557855 | 0.666052476  | 3.55189355  | 0.094011858 | 0.999998134 | NA |
| ASV_16s_38401 | 0.035557855 | 0.666052476  | 3.55189355  | 0.094011858 | 0.999998134 | NA |
| ASV_16s_38402 | 0.035557855 | 0.666052476  | 3.55189355  | 0.094011858 | 0.999998134 | NA |
| ASV_16s_38403 | 0.035557855 | 0.666052476  | 3.55189355  | 0.094011858 | 0.999998134 | NA |
| ASV_16s_38404 | 0.035557855 | 0.666052476  | 3.55189355  | 0.094011858 | 0.999998134 | NA |
| ASV_16s_38405 | 0.035557855 | 0.666052476  | 3.55189355  | 0.094011858 | 0.999998134 | NA |
| ASV_16s_38406 | 0.035557855 | 0.666052476  | 3.55189355  | 0.094011858 | 0.999998134 | NA |
| ASV_16s_38407 | 0.035557855 | 0.666052476  | 3.55189355  | 0.094011858 | 0.999998134 | NA |
| ASV_16s_38408 | 0.035557855 | 0.666052476  | 3.55189355  | 0.094011858 | 0.999998134 | NA |
| ASV_16s_38409 | 0.035557855 | 0.666052476  | 3.55189355  | 0.094011858 | 0.999998134 | NA |
| ASV_16s_38410 | 0.035557855 | 0.666052476  | 3.55189355  | 0.094011858 | 0.999998134 | NA |
| ASV_16s_38411 | 0.035557855 | 0.666052476  | 3.55189355  | 0.094011858 | 0.999998134 | NA |
| ASV_16s_38412 | 0.035557855 | 0.666052476  | 3.55189355  | 0.094011858 | 0.999998134 | NA |
| ASV_16s_38413 | 0.035557855 | 0.666052476  | 3.55189355  | 0.094011858 | 0.999998134 | NA |
| ASV_16s_38414 | 0.018557775 | 0.592554227  | 3.551936005 | 0.074825218 | 0.999999154 | NA |
| ASV_16s_38415 | 0.018557775 | 0.592554227  | 3.551936005 | 0.074825218 | 0.999999154 | NA |
| ASV_16s_38416 | 0.051007083 | 0.666052476  | 3.55189355  | 0.12436552  | 0.999995088 | NA |
| ASV_16s_38417 | 0.051007083 | 0.666052476  | 3.55189355  | 0.12436552  | 0.999995088 | NA |
| ASV_16s_38418 | 0.022998942 | 0.6357754    | 3.551910717 | 0.075548272 | 0.999999125 | NA |
| ASV_16s_38419 | 0.022998942 | 0.6357754    | 3.551910717 | 0.075548272 | 0.999999125 | NA |
| ASV_16s_38420 | 0.031814564 | 0.666052476  | 3.55189355  | 0.086592429 | 0.999998596 | NA |
| ASV_16s_38421 | 0.031814564 | 0.666052476  | 3.55189355  | 0.086592429 | 0.999998596 | NA |
| ASV_16s_38422 | 0.031814564 | 0.666052476  | 3.55189355  | 0.086592429 | 0.999998596 | NA |
| ASV_16s_38423 | 0.031814564 | 0.666052476  | 3.55189355  | 0.086592429 | 0.999998596 | NA |
| ASV_16s_38424 | 0.031814564 | 0.666052476  | 3.55189355  | 0.086592429 | 0.999998596 | NA |
| ASV_16s_38425 | 0.031814564 | 0.666052476  | 3.55189355  | 0.086592429 | 0.999998596 | NA |
| ASV_16s_38426 | 0.043849034 | 0.666052476  | 3.55189355  | 0.110355112 | 0.99999675  | NA |
| ASV_16s_38427 | 0.043849034 | 0.666052476  | 3.55189355  | 0.110355112 | 0.99999675  | NA |
| ASV_16s_38428 | 0.043849034 | 0.666052476  | 3.55189355  | 0.110355112 | 0.99999675  | NA |
| ASV_16s_38429 | 0.043849034 | 0.666052476  | 3.55189355  | 0.110355112 | 0.99999675  | NA |
| ASV_16s_38430 | 0.043849034 | 0.666052476  | 3.55189355  | 0.110355112 | 0.99999675  | NA |
| ASV_16s_38431 | 0.043849034 | 0.666052476  | 3.55189355  | 0.110355112 | 0.99999675  | NA |
| ASV_16s_38432 | 0.043849034 | 0.666052476  | 3.55189355  | 0.110355112 | 0.99999675  | NA |
| ASV_16s_38433 | 0.043849034 | 0.666052476  | 3.55189355  | 0.110355112 | 0.99999675  | NA |
| ASV_16s_38434 | 0.043849034 | 0.666052476  | 3.55189355  | 0.110355112 | 0.99999675  | NA |
| ASV_16s_38435 | 0.03731886  | 0.33321142   | 3.551974339 | 0.107309615 | 0.99999705  | NA |
| ASV_16s_38436 | 0.03731886  | 0.33321142   | 3.551974339 | 0.107309615 | 0.99999705  | NA |
| ASV_16s_38437 | 0.03731886  | 0.33321142   | 3.551974339 | 0.107309615 | 0.99999705  | NA |
| ASV_16s_38438 | 0.03731886  | 0.33321142   | 3.551974339 | 0.107309615 | 0.99999705  | NA |
| ASV_16s_38439 | 0.04946434  | 0.33321142   | 3.551974339 | 0.132750631 | 0.999993848 | NA |
| ASV_16s_38440 | 0.04946434  | 0.33321142   | 3.551974339 | 0.132750631 | 0.999993848 | NA |
| ASV_16s_38441 | 0.04946434  | 0.33321142   | 3.551974339 | 0.132750631 | 0.999993848 | NA |
| ASV_16s_38442 | 0.04946434  | 0.33321142   | 3.551974339 | 0.132750631 | 0.999993848 | NA |
| ASV_16s_38443 | 0.040214437 | 0.33321142   | 3.551974339 | 0.113404655 | 0.999996429 | NA |
| ASV_16s_38444 | 0.040214437 | 0.33321142   | 3.551974339 | 0.113404655 | 0.999996429 | NA |
| ASV_16s_38445 | 0.040214437 | 0.33321142   | 3.551974339 | 0.113404655 | 0.999996429 | NA |
| ASV_16s_38446 | 0.040214437 | 0.33321142   | 3.551974339 | 0.113404655 | 0.999996429 | NA |
| ASV_16s_38447 | 0.040214437 | 0.33321142   | 3.551974339 | 0.113404655 | 0.999996429 | NA |
| ASV_16s_38448 | 0.040214437 | 0.33321142   | 3.551974339 | 0.113404655 | 0.999996429 | NA |









|               |             |              |             |             |             |    |
|---------------|-------------|--------------|-------------|-------------|-------------|----|
| ASV_16s_38717 | 0.031292143 | 0.320387388  | 3.552017032 | 0.176830636 | 0.999983504 | NA |
| ASV_16s_38718 | 0.031292143 | 0.320387388  | 3.552017032 | 0.176830636 | 0.999983504 | NA |
| ASV_16s_38719 | 0.035773761 | 0.319942055  | 3.551984074 | 0.196047238 | 0.999976505 | NA |
| ASV_16s_38720 | 0.035773761 | 0.319942055  | 3.551984074 | 0.196047238 | 0.999976505 | NA |
| ASV_16s_38721 | 0.035773761 | 0.319942055  | 3.551984074 | 0.196047238 | 0.999976505 | NA |
| ASV_16s_38722 | 0.035773761 | 0.319942055  | 3.551984074 | 0.196047238 | 0.999976505 | NA |
| ASV_16s_38723 | 0.035773761 | 0.319942055  | 3.551984074 | 0.196047238 | 0.999976505 | NA |
| ASV_16s_38724 | 0.035773761 | 0.319942055  | 3.551984074 | 0.196047238 | 0.999976505 | NA |
| ASV_16s_38725 | 0.035773761 | 0.319942055  | 3.551984074 | 0.196047238 | 0.999976505 | NA |
| ASV_16s_38726 | 0.035773761 | 0.319942055  | 3.551984074 | 0.196047238 | 0.999976505 | NA |
| ASV_16s_38727 | 0.035773761 | 0.319942055  | 3.551984074 | 0.196047238 | 0.999976505 | NA |
| ASV_16s_38728 | 0.035773761 | 0.319942055  | 3.551984074 | 0.196047238 | 0.999976505 | NA |
| ASV_16s_38729 | 0.035773761 | 0.319942055  | 3.551984074 | 0.196047238 | 0.999976505 | NA |
| ASV_16s_38730 | 0.035773761 | 0.319942055  | 3.551984074 | 0.196047238 | 0.999976505 | NA |
| ASV_16s_38731 | 0.035773761 | 0.319942055  | 3.551984074 | 0.196047238 | 0.999976505 | NA |
| ASV_16s_38732 | 0.035773761 | 0.319942055  | 3.551984074 | 0.196047238 | 0.999976505 | NA |
| ASV_16s_38733 | 0.035773761 | 0.319942055  | 3.551984074 | 0.196047238 | 0.999976505 | NA |
| ASV_16s_38734 | 0.022150228 | 0.575043915  | 3.551529374 | 0.012111486 | 0.999999999 | NA |
| ASV_16s_38735 | 0.022150228 | 0.575043915  | 3.551529374 | 0.012111486 | 0.999999999 | NA |
| ASV_16s_38736 | 0.022150228 | 0.575043915  | 3.551529374 | 0.012111486 | 0.999999999 | NA |
| ASV_16s_38737 | 0.022150228 | 0.575043915  | 3.551529374 | 0.012111486 | 0.999999999 | NA |
| ASV_16s_38738 | 0.032097524 | 0.608803757  | 3.551963744 | 0.164452078 | 0.999987142 | NA |
| ASV_16s_38739 | 0.032097524 | 0.608803757  | 3.551963744 | 0.164452078 | 0.999987142 | NA |
| ASV_16s_38740 | 0.032097524 | 0.608803757  | 3.551963744 | 0.164452078 | 0.999987142 | NA |
| ASV_16s_38741 | 0.032097524 | 0.608803757  | 3.551963744 | 0.164452078 | 0.999987142 | NA |
| ASV_16s_38742 | 0.032097524 | 0.608803757  | 3.551963744 | 0.164452078 | 0.999987142 | NA |
| ASV_16s_38743 | 0.032097524 | 0.608803757  | 3.551963744 | 0.164452078 | 0.999987142 | NA |
| ASV_16s_38744 | 0.032097524 | 0.608803757  | 3.551963744 | 0.164452078 | 0.999987142 | NA |
| ASV_16s_38745 | 0.0374288   | 0.630331298  | 3.551912796 | 0.183523776 | 0.999981261 | NA |
| ASV_16s_38746 | 0.0374288   | 0.630331298  | 3.551912796 | 0.183523776 | 0.999981261 | NA |
| ASV_16s_38747 | 0.0374288   | 0.630331298  | 3.551912796 | 0.183523776 | 0.999981261 | NA |
| ASV_16s_38748 | 0.0374288   | 0.630331298  | 3.551912796 | 0.183523776 | 0.999981261 | NA |
| ASV_16s_38749 | 0.033721014 | 0.089540924  | 3.551964071 | 0.136220123 | 0.999993276 | NA |
| ASV_16s_38750 | 0.041325557 | 0.326050048  | 3.552011086 | 0.096649172 | 0.999997946 | NA |
| ASV_16s_38751 | 0.041950644 | 0.361657131  | 3.552000499 | 0.15518969  | 0.999989466 | NA |
| ASV_16s_38752 | 0.039120109 | 0.322585998  | 3.552030191 | 0.140734273 | 0.999992477 | NA |
| ASV_16s_38753 | 0.038802064 | 0.633443729  | 3.551962276 | 0.143711898 | 0.999991914 | NA |
| ASV_16s_38754 | 0.038802064 | 0.633443729  | 3.551962276 | 0.143711898 | 0.999991914 | NA |
| ASV_16s_38755 | 0.038802064 | 0.633443729  | 3.551962276 | 0.143711898 | 0.999991914 | NA |
| ASV_16s_38756 | 0.070110576 | 0.633443729  | 3.551962276 | 0.230904749 | 0.999958898 | NA |
| ASV_16s_38757 | 0.070110576 | 0.633443729  | 3.551962276 | 0.230904749 | 0.999958898 | NA |
| ASV_16s_38758 | 0.070110576 | 0.633443729  | 3.551962276 | 0.230904749 | 0.999958898 | NA |
| ASV_16s_38759 | 0.043254208 | 0.312385008  | 3.551988626 | 0.171790172 | 0.999985062 | NA |
| ASV_16s_38760 | 0.043254208 | 0.312385008  | 3.551988626 | 0.171790172 | 0.999985062 | NA |
| ASV_16s_38761 | 0.043254208 | 0.312385008  | 3.551988626 | 0.171790172 | 0.999985062 | NA |
| ASV_16s_38762 | 0.043254208 | 0.312385008  | 3.551988626 | 0.171790172 | 0.999985062 | NA |
| ASV_16s_38763 | 0.043254208 | 0.312385008  | 3.551988626 | 0.171790172 | 0.999985062 | NA |
| ASV_16s_38764 | 0.043254208 | 0.312385008  | 3.551988626 | 0.171790172 | 0.999985062 | NA |
| ASV_16s_38765 | 0.052776775 | -0.021612148 | 3.551917303 | 0.207426788 | 0.999971502 | NA |
| ASV_16s_38766 | 0.052776775 | -0.021612148 | 3.551917303 | 0.207426788 | 0.999971502 | NA |
| ASV_16s_38767 | 0.052329623 | 0.633443729  | 3.551962276 | 0.18167026  | 0.999981903 | NA |
| ASV_16s_38768 | 0.036705114 | 0.633443729  | 3.551962276 | 0.137788509 | 0.999993005 | NA |
| ASV_16s_38769 | 0.036705114 | 0.633443729  | 3.551962276 | 0.137788509 | 0.999993005 | NA |
| ASV_16s_38770 | 0.036705114 | 0.633443729  | 3.551962276 | 0.137788509 | 0.999993005 | NA |
| ASV_16s_38771 | 0.046839195 | 0.633443729  | 3.551962276 | 0.166316862 | 0.999986634 | NA |
| ASV_16s_38772 | 0.046839195 | 0.633443729  | 3.551962276 | 0.166316862 | 0.999986634 | NA |
| ASV_16s_38773 | 0.046839195 | 0.633443729  | 3.551962276 | 0.166316862 | 0.999986634 | NA |
| ASV_16s_38774 | 0.046839195 | 0.633443729  | 3.551962276 | 0.166316862 | 0.999986634 | NA |
| ASV_16s_38775 | 0.046839195 | 0.633443729  | 3.551962276 | 0.166316862 | 0.999986634 | NA |
| ASV_16s_38776 | 0.046839195 | 0.633443729  | 3.551962276 | 0.166316862 | 0.999986634 | NA |
| ASV_16s_38777 | 0.079420078 | 0.624463078  | 3.551903875 | 0.258638831 | 0.99993952  | NA |
| ASV_16s_38778 | 0.079420078 | 0.624463078  | 3.551903875 | 0.258638831 | 0.99993952  | NA |
| ASV_16s_38779 | 0.075031791 | 0.624463078  | 3.551903875 | 0.245300974 | 0.999949491 | NA |
| ASV_16s_38780 | 0.075031791 | 0.624463078  | 3.551903875 | 0.245300974 | 0.999949491 | NA |
| ASV_16s_38781 | 0.055972957 | 0.624463078  | 3.551903875 | 0.186812158 | 0.999980085 | NA |
| ASV_16s_38782 | 0.055972957 | 0.624463078  | 3.551903875 | 0.186812158 | 0.999980085 | NA |
| ASV_16s_38783 | 0.036208627 | 0.624463078  | 3.551903875 | 0.1251773   | 0.999994977 | NA |

|               |             |              |             |             |                |
|---------------|-------------|--------------|-------------|-------------|----------------|
| ASV_16s_38784 | 0.036208627 | 0.624463078  | 3.551903875 | 0.1251773   | 0.999994977 NA |
| ASV_16s_38785 | 0.036208627 | 0.624463078  | 3.551903875 | 0.1251773   | 0.999994977 NA |
| ASV_16s_38786 | 0.06984863  | 0.624463078  | 3.551903875 | 0.229485246 | 0.999959754 NA |
| ASV_16s_38787 | 0.035360808 | 0.624463078  | 3.551903875 | 0.122510666 | 0.999995337 NA |
| ASV_16s_38788 | 0.035360808 | 0.624463078  | 3.551903875 | 0.122510666 | 0.999995337 NA |
| ASV_16s_38789 | 0.035360808 | 0.624463078  | 3.551903875 | 0.122510666 | 0.999995337 NA |
| ASV_16s_38790 | 0.024906381 | 0.30139997   | 3.551957545 | 0.112913376 | 0.999996482 NA |
| ASV_16s_38791 | 0.056153685 | 0.298722602  | 3.551951043 | 0.22156532  | 0.9999643 NA   |
| ASV_16s_38792 | 0.056153685 | 0.298722602  | 3.551951043 | 0.22156532  | 0.9999643 NA   |
| ASV_16s_38793 | 0.056153685 | 0.298722602  | 3.551951043 | 0.22156532  | 0.9999643 NA   |
| ASV_16s_38794 | 0.04858059  | 0.298722602  | 3.551951043 | 0.192134505 | 0.999978073 NA |
| ASV_16s_38795 | 0.014140149 | 0.306749402  | 3.55197176  | 0.094625886 | 0.99998091 NA  |
| ASV_16s_38796 | 0.014140149 | 0.306749402  | 3.55197176  | 0.094625886 | 0.99998091 NA  |
| ASV_16s_38797 | 0.0505451   | 0.298722602  | 3.551951043 | 0.19978882  | 0.999974935 NA |
| ASV_16s_38798 | 0.039882861 | 0.298722602  | 3.551951043 | 0.158077889 | 0.999988776 NA |
| ASV_16s_38799 | 0.046839195 | -0.035168918 | 3.551884279 | 0.188069559 | 0.999979622 NA |
| ASV_16s_38800 | 0.046839195 | -0.035168918 | 3.551884279 | 0.188069559 | 0.999979622 NA |
| ASV_16s_38801 | 0.046839195 | -0.035168918 | 3.551884279 | 0.188069559 | 0.999979622 NA |
| ASV_16s_38802 | 0.046839195 | -0.035168918 | 3.551884279 | 0.188069559 | 0.999979622 NA |
| ASV_16s_38803 | 0.05641609  | -0.035168918 | 3.551884279 | 0.221936802 | 0.999964095 NA |
| ASV_16s_38804 | 0.024064723 | -0.003182673 | 3.55190034  | 0.114662608 | 0.99999629 NA  |
| ASV_16s_38805 | 0.082101518 | -0.035168919 | 3.551884279 | 0.311221737 | 0.999886734 NA |
| ASV_16s_38806 | 0.082101518 | -0.035168919 | 3.551884279 | 0.311221737 | 0.999886734 NA |
| ASV_16s_38807 | 0.080070666 | 0.624463078  | 3.551903875 | 0.26061217  | 0.999937937 NA |
| ASV_16s_38808 | 0.080070666 | 0.624463078  | 3.551903875 | 0.26061217  | 0.999937937 NA |
| ASV_16s_38809 | 0.072801738 | 0.624463078  | 3.551903875 | 0.238504505 | 0.999954101 NA |
| ASV_16s_38810 | 0.072801738 | 0.624463078  | 3.551903875 | 0.238504505 | 0.999954101 NA |
| ASV_16s_38811 | 0.074841496 | 0.624463078  | 3.551903875 | 0.244721502 | 0.999949896 NA |
| ASV_16s_38812 | 0.074841496 | 0.624463078  | 3.551903875 | 0.244721502 | 0.999949896 NA |
| ASV_16s_38813 | 0.074841496 | 0.624463078  | 3.551903875 | 0.244721502 | 0.999949896 NA |
| ASV_16s_38814 | 0.054118123 | -0.009233616 | 3.55196282  | 0.204619759 | 0.999972799 NA |
| ASV_16s_38815 | 0.064513647 | -0.009233616 | 3.55196282  | 0.234212252 | 0.999956856 NA |
| ASV_16s_38816 | 0.064513647 | -0.009233616 | 3.55196282  | 0.234212252 | 0.999956856 NA |
| ASV_16s_38817 | 0.064513647 | -0.009233616 | 3.55196282  | 0.234212252 | 0.999956856 NA |
| ASV_16s_38818 | 0.064513647 | -0.009233616 | 3.55196282  | 0.234212252 | 0.999956856 NA |
| ASV_16s_38819 | 0.064513647 | -0.009233616 | 3.55196282  | 0.234212252 | 0.999956856 NA |
| ASV_16s_38820 | 0.064513647 | -0.009233616 | 3.55196282  | 0.234212252 | 0.999956856 NA |
| ASV_16s_38821 | 0.064513647 | -0.009233616 | 3.55196282  | 0.234212252 | 0.999956856 NA |
| ASV_16s_38822 | 0.064513647 | -0.009233616 | 3.55196282  | 0.234212252 | 0.999956856 NA |
| ASV_16s_38823 | 0.064513647 | -0.009233616 | 3.55196282  | 0.234212252 | 0.999956856 NA |
| ASV_16s_38824 | 0.064513647 | -0.009233616 | 3.55196282  | 0.234212252 | 0.999956856 NA |
| ASV_16s_38825 | 0.064513647 | -0.009233616 | 3.55196282  | 0.234212252 | 0.999956856 NA |
| ASV_16s_38826 | 0.064513647 | -0.009233616 | 3.55196282  | 0.234212252 | 0.999956856 NA |
| ASV_16s_38827 | 0.066038365 | 0.643679875  | 3.5520029   | 0.217335158 | 0.999966574 NA |
| ASV_16s_38828 | 0.066038365 | 0.643679875  | 3.5520029   | 0.217335158 | 0.999966574 NA |
| ASV_16s_38829 | 0.066038365 | 0.643679875  | 3.5520029   | 0.217335158 | 0.999966574 NA |
| ASV_16s_38830 | 0.066038365 | 0.643679875  | 3.5520029   | 0.217335158 | 0.999966574 NA |
| ASV_16s_38831 | 0.05710546  | 0.33321142   | 3.551974339 | 0.148590237 | 0.999990929 NA |
| ASV_16s_38832 | 0.05710546  | 0.33321142   | 3.551974339 | 0.148590237 | 0.999990929 NA |
| ASV_16s_38833 | 0.05710546  | 0.33321142   | 3.551974339 | 0.148590237 | 0.999990929 NA |
| ASV_16s_38834 | 0.03751493  | -0.006740527 | 3.551858065 | 0.10420597  | 0.999997334 NA |
| ASV_16s_38835 | 0.03751493  | -0.006740527 | 3.551858065 | 0.10420597  | 0.999997334 NA |
| ASV_16s_38836 | 0.041596967 | 0.666052476  | 3.55189355  | 0.105928185 | 0.999997179 NA |
| ASV_16s_38837 | 0.041596967 | 0.666052476  | 3.55189355  | 0.105928185 | 0.999997179 NA |
| ASV_16s_38838 | 0.041596967 | 0.666052476  | 3.55189355  | 0.105928185 | 0.999997179 NA |
| ASV_16s_38839 | 0.041596967 | 0.666052476  | 3.55189355  | 0.105928185 | 0.999997179 NA |
| ASV_16s_38840 | 0.041596967 | 0.666052476  | 3.55189355  | 0.105928185 | 0.999997179 NA |
| ASV_16s_38841 | 0.041596967 | 0.666052476  | 3.55189355  | 0.105928185 | 0.999997179 NA |
| ASV_16s_38842 | 0.041596967 | 0.666052476  | 3.55189355  | 0.105928185 | 0.999997179 NA |
| ASV_16s_38843 | 0.041596967 | 0.666052476  | 3.55189355  | 0.105928185 | 0.999997179 NA |
| ASV_16s_38844 | 0.041596967 | 0.666052476  | 3.55189355  | 0.105928185 | 0.999997179 NA |
| ASV_16s_38845 | 0.041596967 | 0.666052476  | 3.55189355  | 0.105928185 | 0.999997179 NA |
| ASV_16s_38846 | 0.023703308 | 0.037183947  | 3.551928554 | 0.154178521 | 0.9999897 NA   |
| ASV_16s_38847 | 0.023703308 | 0.037183947  | 3.551928554 | 0.154178521 | 0.9999897 NA   |
| ASV_16s_38848 | 0.073733042 | -0.001685066 | 3.55165384  | 0.479291036 | 0.999518832 NA |
| ASV_16s_38849 | 0.073733042 | -0.001685066 | 3.55165384  | 0.479291036 | 0.999518832 NA |
| ASV_16s_38850 | 0.073733042 | -0.001685066 | 3.55165384  | 0.479291036 | 0.999518832 NA |















































|               |             |             |             |              |                |
|---------------|-------------|-------------|-------------|--------------|----------------|
| ASV_16s_40191 | 0.024511954 | 0.028553451 | 3.551938175 | 0.112869894  | 0.999996487 NA |
| ASV_16s_40192 | 0.024511954 | 0.028553451 | 3.551938175 | 0.112869894  | 0.999996487 NA |
| ASV_16s_40193 | 0.024511954 | 0.028553451 | 3.551938175 | 0.112869894  | 0.999996487 NA |
| ASV_16s_40194 | 0.024511954 | 0.028553451 | 3.551938175 | 0.112869894  | 0.999996487 NA |
| ASV_16s_40195 | 0.024511954 | 0.028553451 | 3.551938175 | 0.112869894  | 0.999996487 NA |
| ASV_16s_40196 | 0.024511954 | 0.028553451 | 3.551938175 | 0.112869894  | 0.999996487 NA |
| ASV_16s_40197 | 0.024511954 | 0.028553451 | 3.551938175 | 0.112869894  | 0.999996487 NA |
| ASV_16s_40198 | 0.024511954 | 0.028553451 | 3.551938175 | 0.112869894  | 0.999996487 NA |
| ASV_16s_40199 | 0.024511954 | 0.028553451 | 3.551938175 | 0.112869894  | 0.999996487 NA |
| ASV_16s_40200 | 0.024511954 | 0.028553451 | 3.551938175 | 0.112869894  | 0.999996487 NA |
| ASV_16s_40201 | 0.024511954 | 0.028553451 | 3.551938175 | 0.112869894  | 0.999996487 NA |
| ASV_16s_40202 | 0.024511954 | 0.028553451 | 3.551938175 | 0.112869894  | 0.999996487 NA |
| ASV_16s_40203 | 0.024511954 | 0.028553451 | 3.551938175 | 0.112869894  | 0.999996487 NA |
| ASV_16s_40204 | 0.024511954 | 0.028553451 | 3.551938175 | 0.112869894  | 0.999996487 NA |
| ASV_16s_40205 | 0.024511954 | 0.028553451 | 3.551938175 | 0.112869894  | 0.999996487 NA |
| ASV_16s_40206 | 0.024511954 | 0.028553451 | 3.551938175 | 0.112869894  | 0.999996487 NA |
| ASV_16s_40207 | 0.037335039 | 0.028553451 | 3.551938175 | 0.150575688  | 0.999990505 NA |
| ASV_16s_40208 | 0.037335039 | 0.028553451 | 3.551938175 | 0.150575688  | 0.999990505 NA |
| ASV_16s_40209 | 0.037335039 | 0.028553451 | 3.551938175 | 0.150575688  | 0.999990505 NA |
| ASV_16s_40210 | 0.037335039 | 0.028553451 | 3.551938175 | 0.150575688  | 0.999990505 NA |
| ASV_16s_40211 | 0.037335039 | 0.028553451 | 3.551938175 | 0.150575688  | 0.999990505 NA |
| ASV_16s_40212 | 0.037335039 | 0.028553451 | 3.551938175 | 0.150575688  | 0.999990505 NA |
| ASV_16s_40213 | 0.037335039 | 0.028553451 | 3.551938175 | 0.150575688  | 0.999990505 NA |
| ASV_16s_40214 | 0.037335039 | 0.028553451 | 3.551938175 | 0.150575688  | 0.999990505 NA |
| ASV_16s_40215 | 0.037335039 | 0.028553451 | 3.551938175 | 0.150575688  | 0.999990505 NA |
| ASV_16s_40216 | 0.037335039 | 0.028553451 | 3.551938175 | 0.150575688  | 0.999990505 NA |
| ASV_16s_40217 | 0.037335039 | 0.028553451 | 3.551938175 | 0.150575688  | 0.999990505 NA |
| ASV_16s_40218 | 0.054120921 | 0.588012567 | 3.551969716 | 0.177302855  | 0.999983352 NA |
| ASV_16s_40219 | 0.054120921 | 0.588012567 | 3.551969716 | 0.177302855  | 0.999983352 NA |
| ASV_16s_40220 | 0.007809665 | 0.045789911 | 3.551746653 | -0.027872548 | 1 NA           |
| ASV_16s_40221 | 0.015866372 | 0.272854602 | 3.55176609  | -0.006494664 | 1 NA           |
| ASV_16s_40222 | 0.015866372 | 0.272854602 | 3.55176609  | -0.006494664 | 1 NA           |
| ASV_16s_40223 | 0.015866372 | 0.272854602 | 3.55176609  | -0.006494664 | 1 NA           |
| ASV_16s_40224 | 0.008234618 | 0.297175283 | 3.551897871 | -0.028569777 | 1 NA           |
| ASV_16s_40225 | 0.010886943 | 0.282302503 | 3.551825079 | -0.019924657 | 1 NA           |
| ASV_16s_40230 | 0.03822728  | 0.553093639 | 3.551733091 | -0.020921229 | 1 NA           |
| ASV_16s_40231 | 0.03822728  | 0.553093639 | 3.551733091 | -0.020921229 | 1 NA           |
| ASV_16s_40232 | 0.03822728  | 0.553093639 | 3.551733091 | -0.020921229 | 1 NA           |
| ASV_16s_40233 | 0.011331031 | 0.539505166 | 3.551825869 | -0.022454162 | 1 NA           |
| ASV_16s_40234 | 0.034440109 | 0.602383806 | 3.551972356 | 0.15920262   | 0.999988499 NA |
| ASV_16s_40235 | 0.034440109 | 0.602383806 | 3.551972356 | 0.15920262   | 0.999988499 NA |
| ASV_16s_40236 | 0.034440109 | 0.602383806 | 3.551972356 | 0.15920262   | 0.999988499 NA |
| ASV_16s_40237 | 0.034440109 | 0.602383806 | 3.551972356 | 0.15920262   | 0.999988499 NA |
| ASV_16s_40238 | 0.034440109 | 0.602383806 | 3.551972356 | 0.15920262   | 0.999988499 NA |
| ASV_16s_40239 | 0.034440109 | 0.602383806 | 3.551972356 | 0.15920262   | 0.999988499 NA |
| ASV_16s_40240 | 0.034440109 | 0.602383806 | 3.551972356 | 0.15920262   | 0.999988499 NA |
| ASV_16s_40241 | 0.034440109 | 0.602383806 | 3.551972356 | 0.15920262   | 0.999988499 NA |
| ASV_16s_40242 | 0.034440109 | 0.602383806 | 3.551972356 | 0.15920262   | 0.999988499 NA |
| ASV_16s_40243 | 0.034440109 | 0.602383806 | 3.551972356 | 0.15920262   | 0.999988499 NA |
| ASV_16s_40244 | 0.034440109 | 0.602383806 | 3.551972356 | 0.15920262   | 0.999988499 NA |
| ASV_16s_40245 | 0.034440109 | 0.602383806 | 3.551972356 | 0.15920262   | 0.999988499 NA |
| ASV_16s_40246 | 0.027037932 | 0.582312689 | 3.551990779 | 0.133563539  | 0.999993718 NA |
| ASV_16s_40247 | 0.027037932 | 0.582312689 | 3.551990779 | 0.133563539  | 0.999993718 NA |
| ASV_16s_40248 | 0.033056151 | 0.31977002  | 3.551980565 | 0.126343333  | 0.999994814 NA |
| ASV_16s_40249 | 0.027957406 | 0.406446491 | 3.552002287 | 0.096990945  | 0.999997921 NA |
| ASV_16s_40250 | 0.031368458 | 0.032291917 | 3.551951963 | 0.093440012  | 0.999998173 NA |
| ASV_16s_40251 | 0.036372896 | 0.222432687 | 3.55193885  | 0.143729046  | 0.999991911 NA |
| ASV_16s_40252 | 0.045516446 | 0.59166423  | 3.551907754 | -0.033409689 | 1 NA           |
| ASV_16s_40253 | 0.04722425  | 0.315419866 | 3.551957779 | 0.080147126  | 0.999998926 NA |
| ASV_16s_40254 | 0.036142632 | 0.175671089 | 3.551980876 | 0.108267405  | 0.999996958 NA |
| ASV_16s_40255 | 0.030108588 | 0.175671089 | 3.551980876 | 0.096722458  | 0.99999794 NA  |
| ASV_16s_40256 | 0.039082383 | 0.320416047 | 3.551934041 | 0.156769875  | 0.999989092 NA |
| ASV_16s_40257 | 0.028237777 | 0.175671089 | 3.551980876 | 0.109893259  | 0.999996797 NA |
| ASV_16s_40258 | 0.034694779 | 0.2244267   | 3.551995238 | 0.116782644  | 0.999996047 NA |
| ASV_16s_40259 | 0.031669852 | 0.218734034 | 3.551965098 | -0.037488814 | 1 NA           |
| ASV_16s_40260 | 0.032155655 | 0.588012567 | 3.551969716 | 0.119158973  | 0.999995763 NA |
| ASV_16s_40261 | 0.032155655 | 0.588012567 | 3.551969716 | 0.119158973  | 0.999995763 NA |



















|               |             |             |             |             |                |
|---------------|-------------|-------------|-------------|-------------|----------------|
| ASV_16s_40798 | 0.031461526 | 0.588012567 | 3.551969716 | 0.117299663 | 0.999995987 NA |
| ASV_16s_40799 | 0.031461526 | 0.588012567 | 3.551969716 | 0.117299663 | 0.999995987 NA |
| ASV_16s_40800 | 0.040147881 | 0.588012567 | 3.551969716 | 0.140469803 | 0.999992525 NA |
| ASV_16s_40801 | 0.040147881 | 0.588012567 | 3.551969716 | 0.140469803 | 0.999992525 NA |
| ASV_16s_40802 | 0.068074352 | 0.578911905 | 3.551927865 | 0.215011555 | 0.999967779 NA |
| ASV_16s_40803 | 0.068074352 | 0.578911905 | 3.551927865 | 0.215011555 | 0.999967779 NA |
| ASV_16s_40804 | 0.068074352 | 0.578911905 | 3.551927865 | 0.215011555 | 0.999967779 NA |
| ASV_16s_40805 | 0.064312963 | 0.578911905 | 3.551927865 | 0.204242731 | 0.99997297 NA  |
| ASV_16s_40806 | 0.064312963 | 0.578911905 | 3.551927865 | 0.204242731 | 0.99997297 NA  |
| ASV_16s_40807 | 0.04797682  | 0.578911905 | 3.551927865 | 0.156993766 | 0.999989039 NA |
| ASV_16s_40808 | 0.031035966 | 0.578911905 | 3.551927865 | 0.107157854 | 0.999997064 NA |
| ASV_16s_40809 | 0.031035966 | 0.578911905 | 3.551927865 | 0.107157854 | 0.999997064 NA |
| ASV_16s_40810 | 0.031035966 | 0.578911905 | 3.551927865 | 0.107157854 | 0.999997064 NA |
| ASV_16s_40811 | 0.031035966 | 0.578911905 | 3.551927865 | 0.107157854 | 0.999997064 NA |
| ASV_16s_40812 | 0.031035966 | 0.578911905 | 3.551927865 | 0.107157854 | 0.999997064 NA |
| ASV_16s_40813 | 0.031035966 | 0.578911905 | 3.551927865 | 0.107157854 | 0.999997064 NA |
| ASV_16s_40814 | 0.059870254 | 0.578911905 | 3.551927865 | 0.191470472 | 0.999978331 NA |
| ASV_16s_40815 | 0.059870254 | 0.578911905 | 3.551927865 | 0.191470472 | 0.999978331 NA |
| ASV_16s_40816 | 0.030309264 | 0.578911905 | 3.551927865 | 0.105000648 | 0.999997263 NA |
| ASV_16s_40817 | 0.04813173  | 0.301671942 | 3.551958214 | 0.18464792  | 0.999980865 NA |
| ASV_16s_40818 | 0.04813173  | 0.301671942 | 3.551958214 | 0.18464792  | 0.999980865 NA |
| ASV_16s_40819 | 0.014716803 | 0.306439581 | 3.551970875 | 0.092731348 | 0.99999822 NA  |
| ASV_16s_40820 | 0.020409973 | 0.303462465 | 3.55196276  | 0.092719428 | 0.999998221 NA |
| ASV_16s_40821 | 0.012120128 | 0.307927093 | 3.551975202 | 0.083663412 | 0.999998754 NA |
| ASV_16s_40822 | 0.012120128 | 0.307927093 | 3.551975202 | 0.083663412 | 0.999998754 NA |
| ASV_16s_40823 | 0.043324371 | 0.301671942 | 3.551958214 | 0.167180036 | 0.999986395 NA |
| ASV_16s_40824 | 0.016995315 | 0.305207204 | 3.551967429 | 0.091769633 | 0.999998283 NA |
| ASV_16s_40825 | 0.03418531  | 0.301671942 | 3.551958214 | 0.133706072 | 0.999993694 NA |
| ASV_16s_40826 | 0.03418531  | 0.301671942 | 3.551958214 | 0.133706072 | 0.999993694 NA |
| ASV_16s_40827 | 0.040147881 | 0.017446039 | 3.551910423 | 0.158001099 | 0.999988795 NA |
| ASV_16s_40828 | 0.040147881 | 0.017446039 | 3.551910423 | 0.158001099 | 0.999988795 NA |
| ASV_16s_40829 | 0.040147881 | 0.017446039 | 3.551910423 | 0.158001099 | 0.999988795 NA |
| ASV_16s_40830 | 0.040147881 | 0.017446039 | 3.551910423 | 0.158001099 | 0.999988795 NA |
| ASV_16s_40831 | 0.040147881 | 0.017446039 | 3.551910423 | 0.158001099 | 0.999988795 NA |
| ASV_16s_40832 | 0.040147881 | 0.017446039 | 3.551910423 | 0.158001099 | 0.999988795 NA |
| ASV_16s_40833 | 0.040147881 | 0.017446039 | 3.551910423 | 0.158001099 | 0.999988795 NA |
| ASV_16s_40834 | 0.040147881 | 0.017446039 | 3.551910423 | 0.158001099 | 0.999988795 NA |
| ASV_16s_40835 | 0.040147881 | 0.017446039 | 3.551910423 | 0.158001099 | 0.999988795 NA |
| ASV_16s_40836 | 0.040147881 | 0.017446039 | 3.551910423 | 0.158001099 | 0.999988795 NA |
| ASV_16s_40837 | 0.040147881 | 0.017446039 | 3.551910423 | 0.158001099 | 0.999988795 NA |
| ASV_16s_40838 | 0.106759454 | 0.017446039 | 3.551910423 | 0.370650512 | 0.999795937 NA |
| ASV_16s_40839 | 0.020626905 | 0.02742449  | 3.551915435 | 0.095136753 | 0.999998055 NA |
| ASV_16s_40840 | 0.020626905 | 0.02742449  | 3.551915435 | 0.095136753 | 0.999998055 NA |
| ASV_16s_40841 | 0.068632    | 0.578911905 | 3.551927865 | 0.21660462  | 0.999966957 NA |
| ASV_16s_40842 | 0.068632    | 0.578911905 | 3.551927865 | 0.21660462  | 0.999966957 NA |
| ASV_16s_40843 | 0.068632    | 0.578911905 | 3.551927865 | 0.21660462  | 0.999966957 NA |
| ASV_16s_40844 | 0.068632    | 0.578911905 | 3.551927865 | 0.21660462  | 0.999966957 NA |
| ASV_16s_40845 | 0.06240149  | 0.578911905 | 3.551927865 | 0.198754504 | 0.999975376 NA |
| ASV_16s_40846 | 0.06240149  | 0.578911905 | 3.551927865 | 0.198754504 | 0.999975376 NA |
| ASV_16s_40847 | 0.06240149  | 0.578911905 | 3.551927865 | 0.198754504 | 0.999975376 NA |
| ASV_16s_40848 | 0.024059733 | 0.56350967  | 3.55193638  | 0.091330479 | 0.999998312 NA |
| ASV_16s_40849 | 0.046386962 | 0.03808058  | 3.551972811 | 0.17108554  | 0.999985272 NA |
| ASV_16s_40850 | 0.055297412 | 0.03808058  | 3.551972811 | 0.194780702 | 0.999977021 NA |
| ASV_16s_40851 | 0.055297412 | 0.03808058  | 3.551972811 | 0.194780702 | 0.999977021 NA |
| ASV_16s_40852 | 0.055297412 | 0.03808058  | 3.551972811 | 0.194780702 | 0.999977021 NA |
| ASV_16s_40853 | 0.055297412 | 0.03808058  | 3.551972811 | 0.194780702 | 0.999977021 NA |
| ASV_16s_40854 | 0.055297412 | 0.03808058  | 3.551972811 | 0.194780702 | 0.999977021 NA |
| ASV_16s_40855 | 0.055297412 | 0.03808058  | 3.551972811 | 0.194780702 | 0.999977021 NA |
| ASV_16s_40856 | 0.055297412 | 0.03808058  | 3.551972811 | 0.194780702 | 0.999977021 NA |
| ASV_16s_40857 | 0.055297412 | 0.03808058  | 3.551972811 | 0.194780702 | 0.999977021 NA |
| ASV_16s_40858 | 0.055297412 | 0.03808058  | 3.551972811 | 0.194780702 | 0.999977021 NA |
| ASV_16s_40859 | 0.055297412 | 0.03808058  | 3.551972811 | 0.194780702 | 0.999977021 NA |
| ASV_16s_40860 | 0.055297412 | 0.03808058  | 3.551972811 | 0.194780702 | 0.999977021 NA |
| ASV_16s_40861 | 0.055297412 | 0.03808058  | 3.551972811 | 0.194780702 | 0.999977021 NA |
| ASV_16s_40862 | 0.055297412 | 0.03808058  | 3.551972811 | 0.194780702 | 0.999977021 NA |
| ASV_16s_40863 | 0.055297412 | 0.03808058  | 3.551972811 | 0.194780702 | 0.999977021 NA |
| ASV_16s_40864 | 0.055297412 | 0.03808058  | 3.551972811 | 0.194780702 | 0.999977021 NA |























































|               |             |             |             |              |             |    |
|---------------|-------------|-------------|-------------|--------------|-------------|----|
| ASV_16s_42473 | 0.020426628 | 0.077433609 | 3.551952537 | 0.094611853  | 0.999998092 | NA |
| ASV_16s_42474 | 0.020426628 | 0.077433609 | 3.551952537 | 0.094611853  | 0.999998092 | NA |
| ASV_16s_42475 | 0.020426628 | 0.077433609 | 3.551952537 | 0.094611853  | 0.999998092 | NA |
| ASV_16s_42476 | 0.020426628 | 0.077433609 | 3.551952537 | 0.094611853  | 0.999998092 | NA |
| ASV_16s_42477 | 0.020426628 | 0.077433609 | 3.551952537 | 0.094611853  | 0.999998092 | NA |
| ASV_16s_42478 | 0.020426628 | 0.077433609 | 3.551952537 | 0.094611853  | 0.999998092 | NA |
| ASV_16s_42479 | 0.020426628 | 0.077433609 | 3.551952537 | 0.094611853  | 0.999998092 | NA |
| ASV_16s_42480 | 0.020426628 | 0.077433609 | 3.551952537 | 0.094611853  | 0.999998092 | NA |
| ASV_16s_42481 | 0.020426628 | 0.077433609 | 3.551952537 | 0.094611853  | 0.999998092 | NA |
| ASV_16s_42482 | 0.020426628 | 0.077433609 | 3.551952537 | 0.094611853  | 0.999998092 | NA |
| ASV_16s_42483 | 0.020426628 | 0.077433609 | 3.551952537 | 0.094611853  | 0.999998092 | NA |
| ASV_16s_42484 | 0.031112532 | 0.077433609 | 3.551952537 | 0.123637218  | 0.999995187 | NA |
| ASV_16s_42485 | 0.031112532 | 0.077433609 | 3.551952537 | 0.123637218  | 0.999995187 | NA |
| ASV_16s_42486 | 0.031112532 | 0.077433609 | 3.551952537 | 0.123637218  | 0.999995187 | NA |
| ASV_16s_42487 | 0.031112532 | 0.077433609 | 3.551952537 | 0.123637218  | 0.999995187 | NA |
| ASV_16s_42488 | 0.031112532 | 0.077433609 | 3.551952537 | 0.123637218  | 0.999995187 | NA |
| ASV_16s_42489 | 0.031112532 | 0.077433609 | 3.551952537 | 0.123637218  | 0.999995187 | NA |
| ASV_16s_42490 | 0.031112532 | 0.077433609 | 3.551952537 | 0.123637218  | 0.999995187 | NA |
| ASV_16s_42491 | 0.031112532 | 0.077433609 | 3.551952537 | 0.123637218  | 0.999995187 | NA |
| ASV_16s_42492 | 0.031112532 | 0.077433609 | 3.551952537 | 0.123637218  | 0.999995187 | NA |
| ASV_16s_42493 | 0.031112532 | 0.077433609 | 3.551952537 | 0.123637218  | 0.999995187 | NA |
| ASV_16s_42494 | 0.031112532 | 0.077433609 | 3.551952537 | 0.123637218  | 0.999995187 | NA |
| ASV_16s_42495 | 0.031112532 | 0.077433609 | 3.551952537 | 0.123637218  | 0.999995187 | NA |
| ASV_16s_42496 | 0.031112532 | 0.077433609 | 3.551952537 | 0.123637218  | 0.999995187 | NA |
| ASV_16s_42497 | 0.031112532 | 0.077433609 | 3.551952537 | 0.123637218  | 0.999995187 | NA |
| ASV_16s_42498 | 0.031112532 | 0.077433609 | 3.551952537 | 0.123637218  | 0.999995187 | NA |
| ASV_16s_42499 | 0.031112532 | 0.077433609 | 3.551952537 | 0.123637218  | 0.999995187 | NA |
| ASV_16s_42500 | 0.045100767 | 0.542581217 | 3.551977514 | 0.144535727  | 0.999991753 | NA |
| ASV_16s_42501 | 0.045100767 | 0.542581217 | 3.551977514 | 0.144535727  | 0.999991753 | NA |
| ASV_16s_42502 | 0.045100767 | 0.542581217 | 3.551977514 | 0.144535727  | 0.999991753 | NA |
| ASV_16s_42503 | 0.006508054 | 0.075227378 | 3.55180216  | -0.031022832 | 1           | NA |
| ASV_16s_42504 | 0.006508054 | 0.075227378 | 3.55180216  | -0.031022832 | 1           | NA |
| ASV_16s_42505 | 0.005772692 | 0.093812225 | 3.551837985 | -0.031845262 | 1           | NA |
| ASV_16s_42506 | 0.00692622  | 0.065309847 | 3.551783374 | -0.030191941 | 1           | NA |
| ASV_16s_42507 | 0.013221976 | 0.297188846 | 3.551897937 | -0.022200012 | 1           | NA |
| ASV_16s_42508 | 0.013221976 | 0.297188846 | 3.551897937 | -0.022200012 | 1           | NA |
| ASV_16s_42509 | 0.006862182 | 0.302589453 | 3.551924365 | -0.031217762 | 1           | NA |
| ASV_16s_42510 | 0.006862182 | 0.302589453 | 3.551924365 | -0.031217762 | 1           | NA |
| ASV_16s_42511 | 0.006862182 | 0.302589453 | 3.551924365 | -0.031217762 | 1           | NA |
| ASV_16s_42512 | 0.009072453 | 0.297188888 | 3.551897937 | -0.024604961 | 1           | NA |
| ASV_16s_42513 | 0.009072453 | 0.297188888 | 3.551897937 | -0.024604961 | 1           | NA |
| ASV_16s_42514 | 0.009072453 | 0.297188888 | 3.551897937 | -0.024604961 | 1           | NA |
| ASV_16s_42519 | 0.031856066 | 0.526742991 | 3.551888786 | -0.070110717 | 1           | NA |
| ASV_16s_42520 | 0.031856066 | 0.526742991 | 3.551888786 | -0.070110717 | 1           | NA |
| ASV_16s_42521 | 0.031856066 | 0.526742991 | 3.551888786 | -0.070110717 | 1           | NA |
| ASV_16s_42522 | 0.031856066 | 0.526742991 | 3.551888786 | -0.070110717 | 1           | NA |
| ASV_16s_42523 | 0.031856066 | 0.526742991 | 3.551888786 | -0.070110717 | 1           | NA |
| ASV_16s_42524 | 0.031856066 | 0.526742991 | 3.551888786 | -0.070110717 | 1           | NA |
| ASV_16s_42525 | 0.031856066 | 0.526742991 | 3.551888786 | -0.070110717 | 1           | NA |
| ASV_16s_42526 | 0.031856066 | 0.526742991 | 3.551888786 | -0.070110717 | 1           | NA |
| ASV_16s_42527 | 0.031856066 | 0.526742991 | 3.551888786 | -0.070110717 | 1           | NA |
| ASV_16s_42528 | 0.031856066 | 0.526742991 | 3.551888786 | -0.070110717 | 1           | NA |
| ASV_16s_42529 | 0.031856066 | 0.526742991 | 3.551888786 | -0.070110717 | 1           | NA |
| ASV_16s_42530 | 0.014453685 | 0.526744336 | 3.551888789 | -0.019504258 | 1           | NA |
| ASV_16s_42531 | 0.014453685 | 0.526744336 | 3.551888789 | -0.019504258 | 1           | NA |
| ASV_16s_42532 | 0.014453685 | 0.526744336 | 3.551888789 | -0.019504258 | 1           | NA |
| ASV_16s_42533 | 0.028700091 | 0.549890972 | 3.552007564 | 0.125003377  | 0.999995001 | NA |
| ASV_16s_42534 | 0.028700091 | 0.549890972 | 3.552007564 | 0.125003377  | 0.999995001 | NA |
| ASV_16s_42535 | 0.028700091 | 0.549890972 | 3.552007564 | 0.125003377  | 0.999995001 | NA |
| ASV_16s_42536 | 0.028700091 | 0.549890972 | 3.552007564 | 0.125003377  | 0.999995001 | NA |
| ASV_16s_42537 | 0.02253161  | 0.549890972 | 3.552007564 | 0.105679797  | 0.999997202 | NA |
| ASV_16s_42538 | 0.02253161  | 0.549890972 | 3.552007564 | 0.105679797  | 0.999997202 | NA |
| ASV_16s_42539 | 0.02253161  | 0.549890972 | 3.552007564 | 0.105679797  | 0.999997202 | NA |
| ASV_16s_42540 | 0.02253161  | 0.549890972 | 3.552007564 | 0.105679797  | 0.999997202 | NA |
| ASV_16s_42541 | 0.032512801 | 0.126192753 | 3.551964904 | 0.102706879  | 0.999997465 | NA |
| ASV_16s_42542 | 0.02783824  | 0.265245243 | 3.551978637 | 0.083438569  | 0.999998766 | NA |
| ASV_16s_42543 | 0.029221852 | 0.223706229 | 3.551992359 | 0.089444727  | 0.999998429 | NA |

|               |             |             |             |              |                |
|---------------|-------------|-------------|-------------|--------------|----------------|
| ASV_16s_42544 | 0.029481474 | 0.223706229 | 3.551992359 | 0.089974629  | 0.999998397 NA |
| ASV_16s_42545 | 0.02917317  | 0.223706229 | 3.551992359 | 0.08934532   | 0.999998435 NA |
| ASV_16s_42546 | 0.026512073 | 0.223706229 | 3.551992359 | 0.085275014  | 0.999998669 NA |
| ASV_16s_42547 | 0.038724471 | 0.368910234 | 3.551943282 | 0.16812659   | 0.999986128 NA |
| ASV_16s_42548 | 0.026937996 | 0.26638713  | 3.551977281 | -0.062151067 | 1 NA           |
| ASV_16s_42549 | 0.026796379 | 0.542581217 | 3.551977514 | 0.099302212  | 0.999997744 NA |
| ASV_16s_42550 | 0.026796379 | 0.542581217 | 3.551977514 | 0.099302212  | 0.999997744 NA |
| ASV_16s_42551 | 0.026796379 | 0.542581217 | 3.551977514 | 0.099302212  | 0.999997744 NA |
| ASV_16s_42552 | 0.026796379 | 0.542581217 | 3.551977514 | 0.099302212  | 0.999997744 NA |
| ASV_16s_42553 | 0.034583022 | 0.313959946 | 3.551993321 | 0.130309809  | 0.99999423 NA  |
| ASV_16s_42554 | 0.034583022 | 0.313959946 | 3.551993321 | 0.130309809  | 0.99999423 NA  |
| ASV_16s_42555 | 0.034583022 | 0.313959946 | 3.551993321 | 0.130309809  | 0.99999423 NA  |
| ASV_16s_42556 | 0.034583022 | 0.313959946 | 3.551993321 | 0.130309809  | 0.99999423 NA  |
| ASV_16s_42557 | 0.034583022 | 0.313959946 | 3.551993321 | 0.130309809  | 0.99999423 NA  |
| ASV_16s_42558 | 0.034583022 | 0.313959946 | 3.551993321 | 0.130309809  | 0.99999423 NA  |
| ASV_16s_42559 | 0.034583022 | 0.313959946 | 3.551993321 | 0.130309809  | 0.99999423 NA  |
| ASV_16s_42560 | 0.027372075 | 0.313959946 | 3.551993321 | 0.10996497   | 0.999996789 NA |
| ASV_16s_42561 | 0.036708837 | 0.313959946 | 3.551993321 | 0.136265108  | 0.999993268 NA |
| ASV_16s_42562 | 0.036708837 | 0.313959946 | 3.551993321 | 0.136265108  | 0.999993268 NA |
| ASV_16s_42563 | 0.045885035 | 0.313959946 | 3.551993321 | 0.161752865  | 0.999987853 NA |
| ASV_16s_42564 | 0.045885035 | 0.313959946 | 3.551993321 | 0.161752865  | 0.999987853 NA |
| ASV_16s_42565 | 0.034563109 | 0.313959946 | 3.551993321 | 0.130253934  | 0.999994238 NA |
| ASV_16s_42566 | 0.034563109 | 0.313959946 | 3.551993321 | 0.130253934  | 0.999994238 NA |
| ASV_16s_42567 | 0.034421846 | 0.313959946 | 3.551993321 | 0.129857504  | 0.999994299 NA |
| ASV_16s_42568 | 0.03339447  | 0.313959946 | 3.551993321 | 0.126971794  | 0.999994724 NA |
| ASV_16s_42569 | 0.028995338 | 0.458387807 | 3.55198603  | 0.060967859  | 0.999999585 NA |
| ASV_16s_42570 | 0.028392223 | 0.549890862 | 3.552007564 | 0.103364763  | 0.999997408 NA |
| ASV_16s_42571 | 0.028392223 | 0.549890862 | 3.552007564 | 0.103364763  | 0.999997408 NA |
| ASV_16s_42572 | 0.028392223 | 0.549890862 | 3.552007564 | 0.103364763  | 0.999997408 NA |
| ASV_16s_42573 | 0.028392223 | 0.549890862 | 3.552007564 | 0.103364763  | 0.999997408 NA |
| ASV_16s_42574 | 0.022614278 | 0.549890862 | 3.552007564 | 0.089512795  | 0.999998425 NA |
| ASV_16s_42575 | 0.022614278 | 0.549890862 | 3.552007564 | 0.089512795  | 0.999998425 NA |
| ASV_16s_42576 | 0.022614278 | 0.549890862 | 3.552007564 | 0.089512795  | 0.999998425 NA |
| ASV_16s_42577 | 0.022614278 | 0.549890862 | 3.552007564 | 0.089512795  | 0.999998425 NA |
| ASV_16s_42578 | 0.024150887 | 0.549890862 | 3.552007564 | 0.093207131  | 0.999998188 NA |
| ASV_16s_42579 | 0.024150887 | 0.549890862 | 3.552007564 | 0.093207131  | 0.999998188 NA |
| ASV_16s_42580 | 0.024150887 | 0.549890862 | 3.552007564 | 0.093207131  | 0.999998188 NA |
| ASV_16s_42581 | 0.025446161 | 0.549890862 | 3.552007564 | 0.096315331  | 0.99999797 NA  |
| ASV_16s_42582 | 0.025446161 | 0.549890862 | 3.552007564 | 0.096315331  | 0.99999797 NA  |
| ASV_16s_42583 | 0.025446161 | 0.549890862 | 3.552007564 | 0.096315331  | 0.99999797 NA  |
| ASV_16s_42584 | 0.025446161 | 0.549890862 | 3.552007564 | 0.096315331  | 0.99999797 NA  |
| ASV_16s_42585 | 0.025446161 | 0.549890862 | 3.552007564 | 0.096315331  | 0.99999797 NA  |
| ASV_16s_42586 | 0.025446161 | 0.549890862 | 3.552007564 | 0.096315331  | 0.99999797 NA  |
| ASV_16s_42587 | 0.025446161 | 0.549890862 | 3.552007564 | 0.096315331  | 0.99999797 NA  |
| ASV_16s_42588 | 0.025446161 | 0.549890862 | 3.552007564 | 0.096315331  | 0.99999797 NA  |
| ASV_16s_42589 | 0.025446161 | 0.549890862 | 3.552007564 | 0.096315331  | 0.99999797 NA  |
| ASV_16s_42590 | 0.025446161 | 0.549890862 | 3.552007564 | 0.096315331  | 0.99999797 NA  |
| ASV_16s_42591 | 0.025446161 | 0.549890862 | 3.552007564 | 0.096315331  | 0.99999797 NA  |
| ASV_16s_42592 | 0.025446161 | 0.549890862 | 3.552007564 | 0.096315331  | 0.99999797 NA  |
| ASV_16s_42593 | 0.025446161 | 0.549890862 | 3.552007564 | 0.096315331  | 0.99999797 NA  |
| ASV_16s_42594 | 0.03247466  | 0.549890862 | 3.552007564 | 0.113087515  | 0.999996463 NA |
| ASV_16s_42595 | 0.03247466  | 0.549890862 | 3.552007564 | 0.113087515  | 0.999996463 NA |
| ASV_16s_42596 | 0.03247466  | 0.549890862 | 3.552007564 | 0.113087515  | 0.999996463 NA |
| ASV_16s_42597 | 0.02334682  | 0.549890862 | 3.552007564 | 0.091274935  | 0.999998315 NA |
| ASV_16s_42598 | 0.02334682  | 0.549890862 | 3.552007564 | 0.091274935  | 0.999998315 NA |
| ASV_16s_42599 | 0.02334682  | 0.549890862 | 3.552007564 | 0.091274935  | 0.999998315 NA |
| ASV_16s_42600 | 0.02334682  | 0.549890862 | 3.552007564 | 0.091274935  | 0.999998315 NA |
| ASV_16s_42601 | 0.02334682  | 0.549890862 | 3.552007564 | 0.091274935  | 0.999998315 NA |
| ASV_16s_42602 | 0.02334682  | 0.549890862 | 3.552007564 | 0.091274935  | 0.999998315 NA |
| ASV_16s_42603 | 0.02334682  | 0.549890862 | 3.552007564 | 0.091274935  | 0.999998315 NA |
| ASV_16s_42604 | 0.036891406 | 0.549890862 | 3.552007564 | 0.123546952  | 0.999995199 NA |
| ASV_16s_42605 | 0.036891406 | 0.549890862 | 3.552007564 | 0.123546952  | 0.999995199 NA |
| ASV_16s_42606 | 0.036891406 | 0.549890862 | 3.552007564 | 0.123546952  | 0.999995199 NA |
| ASV_16s_42607 | 0.036891406 | 0.549890862 | 3.552007564 | 0.123546952  | 0.999995199 NA |
| ASV_16s_42608 | 0.036891406 | 0.549890862 | 3.552007564 | 0.123546952  | 0.999995199 NA |
| ASV_16s_42609 | 0.02213439  | 0.321202348 | 3.552023944 | 0.095664065  | 0.999998017 NA |
| ASV_16s_42610 | 0.02213439  | 0.321202348 | 3.552023944 | 0.095664065  | 0.999998017 NA |

















|               |             |             |             |             |                |
|---------------|-------------|-------------|-------------|-------------|----------------|
| ASV_16s_43080 | 0.026734857 | 0.549890972 | 3.552007564 | 0.118863414 | 0.999995799 NA |
| ASV_16s_43081 | 0.026734857 | 0.549890972 | 3.552007564 | 0.118863414 | 0.999995799 NA |
| ASV_16s_43082 | 0.026734857 | 0.549890972 | 3.552007564 | 0.118863414 | 0.999995799 NA |
| ASV_16s_43083 | 0.026734857 | 0.549890972 | 3.552007564 | 0.118863414 | 0.999995799 NA |
| ASV_16s_43084 | 0.026734857 | 0.549890972 | 3.552007564 | 0.118863414 | 0.999995799 NA |
| ASV_16s_43085 | 0.025613019 | 0.543470176 | 3.551983556 | 0.071722234 | 0.99999927 NA  |
| ASV_16s_43086 | 0.023054991 | 0.233833158 | 3.55196627  | 0.104155459 | 0.999997339 NA |
| ASV_16s_43087 | 0.028036756 | 0.321202563 | 3.552023944 | 0.095774327 | 0.999998009 NA |
| ASV_16s_43088 | 0.02771576  | 0.542581217 | 3.551977514 | 0.101600409 | 0.999997558 NA |
| ASV_16s_43089 | 0.02771576  | 0.542581217 | 3.551977514 | 0.101600409 | 0.999997558 NA |
| ASV_16s_43090 | 0.02771576  | 0.542581217 | 3.551977514 | 0.101600409 | 0.999997558 NA |
| ASV_16s_43091 | 0.02771576  | 0.542581217 | 3.551977514 | 0.101600409 | 0.999997558 NA |
| ASV_16s_43092 | 0.02771576  | 0.542581217 | 3.551977514 | 0.101600409 | 0.999997558 NA |
| ASV_16s_43093 | 0.02771576  | 0.542581217 | 3.551977514 | 0.101600409 | 0.999997558 NA |
| ASV_16s_43094 | 0.050078983 | 0.542581217 | 3.551977514 | 0.156650366 | 0.999989121 NA |
| ASV_16s_43095 | 0.050078983 | 0.542581217 | 3.551977514 | 0.156650366 | 0.999989121 NA |
| ASV_16s_43096 | 0.050078983 | 0.542581217 | 3.551977514 | 0.156650366 | 0.999989121 NA |
| ASV_16s_43097 | 0.050078983 | 0.542581217 | 3.551977514 | 0.156650366 | 0.999989121 NA |
| ASV_16s_43098 | 0.050078983 | 0.542581217 | 3.551977514 | 0.156650366 | 0.999989121 NA |
| ASV_16s_43099 | 0.050078983 | 0.542581217 | 3.551977514 | 0.156650366 | 0.999989121 NA |
| ASV_16s_43100 | 0.050078983 | 0.542581217 | 3.551977514 | 0.156650366 | 0.999989121 NA |
| ASV_16s_43101 | 0.030895863 | 0.313959946 | 3.551993321 | 0.119934828 | 0.999995667 NA |
| ASV_16s_43102 | 0.030895863 | 0.313959946 | 3.551993321 | 0.119934828 | 0.999995667 NA |
| ASV_16s_43103 | 0.030895863 | 0.313959946 | 3.551993321 | 0.119934828 | 0.999995667 NA |
| ASV_16s_43104 | 0.030895863 | 0.313959946 | 3.551993321 | 0.119934828 | 0.999995667 NA |
| ASV_16s_43105 | 0.030895863 | 0.313959946 | 3.551993321 | 0.119934828 | 0.999995667 NA |
| ASV_16s_43106 | 0.037697697 | 0.077433609 | 3.551952537 | 0.141279509 | 0.999992376 NA |
| ASV_16s_43107 | 0.037697697 | 0.077433609 | 3.551952537 | 0.141279509 | 0.999992376 NA |
| ASV_16s_43108 | 0.037697697 | 0.077433609 | 3.551952537 | 0.141279509 | 0.999992376 NA |
| ASV_16s_43109 | 0.037697697 | 0.077433609 | 3.551952537 | 0.141279509 | 0.999992376 NA |
| ASV_16s_43110 | 0.037378302 | 0.542581217 | 3.551977514 | 0.125585374 | 0.99999492 NA  |
| ASV_16s_43111 | 0.037378302 | 0.542581217 | 3.551977514 | 0.125585374 | 0.99999492 NA  |
| ASV_16s_43112 | 0.037378302 | 0.542581217 | 3.551977514 | 0.125585374 | 0.99999492 NA  |
| ASV_16s_43113 | 0.037378302 | 0.542581217 | 3.551977514 | 0.125585374 | 0.99999492 NA  |
| ASV_16s_43114 | 0.037378302 | 0.542581217 | 3.551977514 | 0.125585374 | 0.99999492 NA  |
| ASV_16s_43115 | 0.037378302 | 0.542581217 | 3.551977514 | 0.125585374 | 0.99999492 NA  |
| ASV_16s_43116 | 0.026217939 | 0.542581217 | 3.551977514 | 0.097854831 | 0.999997856 NA |
| ASV_16s_43117 | 0.026217939 | 0.542581217 | 3.551977514 | 0.097854831 | 0.999997856 NA |
| ASV_16s_43118 | 0.033456568 | 0.542581217 | 3.551977514 | 0.115887583 | 0.999996151 NA |
| ASV_16s_43119 | 0.033456568 | 0.542581217 | 3.551977514 | 0.115887583 | 0.999996151 NA |
| ASV_16s_43120 | 0.033456568 | 0.542581217 | 3.551977514 | 0.115887583 | 0.999996151 NA |
| ASV_16s_43121 | 0.033456568 | 0.542581217 | 3.551977514 | 0.115887583 | 0.999996151 NA |
| ASV_16s_43122 | 0.033456568 | 0.542581217 | 3.551977514 | 0.115887583 | 0.999996151 NA |
| ASV_16s_43123 | 0.033456568 | 0.542581217 | 3.551977514 | 0.115887583 | 0.999996151 NA |
| ASV_16s_43124 | 0.033456568 | 0.542581217 | 3.551977514 | 0.115887583 | 0.999996151 NA |
| ASV_16s_43125 | 0.033456568 | 0.542581217 | 3.551977514 | 0.115887583 | 0.999996151 NA |
| ASV_16s_43126 | 0.056728627 | 0.533462991 | 3.551952965 | 0.173572645 | 0.999984524 NA |
| ASV_16s_43127 | 0.053594136 | 0.533462991 | 3.551952965 | 0.165258047 | 0.999986925 NA |
| ASV_16s_43128 | 0.039980684 | 0.533462991 | 3.551952965 | 0.128755931 | 0.999994464 NA |
| ASV_16s_43129 | 0.039980684 | 0.533462991 | 3.551952965 | 0.128755931 | 0.999994464 NA |
| ASV_16s_43130 | 0.025863305 | 0.533462991 | 3.551952965 | 0.090217777 | 0.999998382 NA |
| ASV_16s_43131 | 0.025863305 | 0.533462991 | 3.551952965 | 0.090217777 | 0.999998382 NA |
| ASV_16s_43132 | 0.025863305 | 0.533462991 | 3.551952965 | 0.090217777 | 0.999998382 NA |
| ASV_16s_43133 | 0.02525772  | 0.533462991 | 3.551952965 | 0.088548738 | 0.999998483 NA |
| ASV_16s_43134 | 0.02525772  | 0.533462991 | 3.551952965 | 0.088548738 | 0.999998483 NA |
| ASV_16s_43135 | 0.02525772  | 0.533462991 | 3.551952965 | 0.088548738 | 0.999998483 NA |
| ASV_16s_43136 | 0.017790272 | 0.304802724 | 3.551966325 | 0.075090433 | 0.999999144 NA |
| ASV_16s_43137 | 0.040109775 | 0.304640855 | 3.551965887 | 0.149543096 | 0.999990727 NA |
| ASV_16s_43138 | 0.040109775 | 0.304640855 | 3.551965887 | 0.149543096 | 0.999990727 NA |
| ASV_16s_43139 | 0.040109775 | 0.304640855 | 3.551965887 | 0.149543096 | 0.999990727 NA |
| ASV_16s_43140 | 0.040109775 | 0.304640855 | 3.551965887 | 0.149543096 | 0.999990727 NA |
| ASV_16s_43141 | 0.040109775 | 0.304640855 | 3.551965887 | 0.149543096 | 0.999990727 NA |
| ASV_16s_43142 | 0.040109775 | 0.304640855 | 3.551965887 | 0.149543096 | 0.999990727 NA |
| ASV_16s_43143 | 0.034700421 | 0.304640855 | 3.551965887 | 0.131494337 | 0.999994047 NA |
| ASV_16s_43144 | 0.010100107 | 0.309202487 | 3.551979064 | 0.072893251 | 0.999999228 NA |
| ASV_16s_43145 | 0.014162762 | 0.306756503 | 3.551971781 | 0.075468848 | 0.999999129 NA |
| ASV_16s_43146 | 0.028487758 | 0.304640855 | 3.551965887 | 0.110588177 | 0.999996726 NA |



































































|               |             |             |             |              |                |
|---------------|-------------|-------------|-------------|--------------|----------------|
| ASV_16s_45099 | 0.025484853 | 0.489954174 | 3.551939888 | -0.095413622 | 1 NA           |
| ASV_16s_45100 | 0.025484853 | 0.489954174 | 3.551939888 | -0.095413622 | 1 NA           |
| ASV_16s_45101 | 0.025484853 | 0.489954174 | 3.551939888 | -0.095413622 | 1 NA           |
| ASV_16s_45102 | 0.025484853 | 0.489954174 | 3.551939888 | -0.095413622 | 1 NA           |
| ASV_16s_45103 | 0.025484853 | 0.489954174 | 3.551939888 | -0.095413622 | 1 NA           |
| ASV_16s_45104 | 0.011562948 | 0.489954243 | 3.551939888 | -0.029413365 | 1 NA           |
| ASV_16s_45105 | 0.022960073 | 0.502996683 | 3.55201016  | 0.093493945  | 0.999998169 NA |
| ASV_16s_45106 | 0.022960073 | 0.502996683 | 3.55201016  | 0.093493945  | 0.999998169 NA |
| ASV_16s_45107 | 0.022960073 | 0.502996683 | 3.55201016  | 0.093493945  | 0.999998169 NA |
| ASV_16s_45108 | 0.022960073 | 0.502996683 | 3.55201016  | 0.093493945  | 0.999998169 NA |
| ASV_16s_45109 | 0.022960073 | 0.502996683 | 3.55201016  | 0.093493945  | 0.999998169 NA |
| ASV_16s_45110 | 0.022960073 | 0.502996683 | 3.55201016  | 0.093493945  | 0.999998169 NA |
| ASV_16s_45111 | 0.022960073 | 0.502996683 | 3.55201016  | 0.093493945  | 0.999998169 NA |
| ASV_16s_45112 | 0.022960073 | 0.502996683 | 3.55201016  | 0.093493945  | 0.999998169 NA |
| ASV_16s_45113 | 0.022960073 | 0.502996683 | 3.55201016  | 0.093493945  | 0.999998169 NA |
| ASV_16s_45114 | 0.018025288 | 0.502996683 | 3.55201016  | 0.080655279  | 0.999998903 NA |
| ASV_16s_45115 | 0.018025288 | 0.502996683 | 3.55201016  | 0.080655279  | 0.999998903 NA |
| ASV_16s_45116 | 0.018025288 | 0.502996683 | 3.55201016  | 0.080655279  | 0.999998903 NA |
| ASV_16s_45117 | 0.018025288 | 0.502996683 | 3.55201016  | 0.080655279  | 0.999998903 NA |
| ASV_16s_45118 | 0.018025288 | 0.502996683 | 3.55201016  | 0.080655279  | 0.999998903 NA |
| ASV_16s_45119 | 0.018025288 | 0.502996683 | 3.55201016  | 0.080655279  | 0.999998903 NA |
| ASV_16s_45120 | 0.018025288 | 0.502996683 | 3.55201016  | 0.080655279  | 0.999998903 NA |
| ASV_16s_45121 | 0.032563944 | 0.502996683 | 3.55201016  | 0.118171622  | 0.999995883 NA |
| ASV_16s_45122 | 0.024268169 | 0.222985696 | 3.551989511 | 0.069434916  | 0.999999348 NA |
| ASV_16s_45123 | 0.021385309 | 0.222985696 | 3.551989511 | 0.064809048  | 0.999999487 NA |
| ASV_16s_45124 | 0.021139404 | 0.222985696 | 3.551989511 | 0.064718913  | 0.999999489 NA |
| ASV_16s_45125 | 0.021820106 | 0.222985696 | 3.551989511 | 0.065478384  | 0.999999468 NA |
| ASV_16s_45126 | 0.021701111 | 0.222985696 | 3.551989511 | 0.065345812  | 0.999999472 NA |
| ASV_16s_45127 | 0.020458018 | 0.222985696 | 3.551989511 | 0.063278868  | 0.999999527 NA |
| ASV_16s_45128 | 0.021437103 | 0.497149673 | 3.551985684 | 0.080755306  | 0.999998898 NA |
| ASV_16s_45129 | 0.021437103 | 0.497149673 | 3.551985684 | 0.080755306  | 0.999998898 NA |
| ASV_16s_45130 | 0.021437103 | 0.497149673 | 3.551985684 | 0.080755306  | 0.999998898 NA |
| ASV_16s_45131 | 0.027666418 | 0.314710824 | 3.551995894 | 0.103680675  | 0.999997381 NA |
| ASV_16s_45132 | 0.027666418 | 0.314710824 | 3.551995894 | 0.103680675  | 0.999997381 NA |
| ASV_16s_45133 | 0.027666418 | 0.314710824 | 3.551995894 | 0.103680675  | 0.999997381 NA |
| ASV_16s_45134 | 0.027666418 | 0.314710824 | 3.551995894 | 0.103680675  | 0.999997381 NA |
| ASV_16s_45135 | 0.027666418 | 0.314710824 | 3.551995894 | 0.103680675  | 0.999997381 NA |
| ASV_16s_45136 | 0.027666418 | 0.314710824 | 3.551995894 | 0.103680675  | 0.999997381 NA |
| ASV_16s_45137 | 0.027666418 | 0.314710824 | 3.551995894 | 0.103680675  | 0.999997381 NA |
| ASV_16s_45138 | 0.027666418 | 0.314710824 | 3.551995894 | 0.103680675  | 0.999997381 NA |
| ASV_16s_45139 | 0.027666418 | 0.314710824 | 3.551995894 | 0.103680675  | 0.999997381 NA |
| ASV_16s_45140 | 0.02189766  | 0.314710824 | 3.551995894 | 0.088786162  | 0.999998469 NA |
| ASV_16s_45141 | 0.03523092  | 0.314710824 | 3.551995894 | 0.122952908  | 0.999995278 NA |
| ASV_16s_45142 | 0.036708028 | 0.314710824 | 3.551995894 | 0.126682411  | 0.999994765 NA |
| ASV_16s_45143 | 0.027650487 | 0.314710824 | 3.551995894 | 0.103639781  | 0.999997384 NA |
| ASV_16s_45144 | 0.027650487 | 0.314710824 | 3.551995894 | 0.103639781  | 0.999997384 NA |
| ASV_16s_45145 | 0.027537477 | 0.314710824 | 3.551995894 | 0.103349639  | 0.999997409 NA |
| ASV_16s_45146 | 0.026715576 | 0.314710824 | 3.551995894 | 0.101237526  | 0.999997588 NA |
| ASV_16s_45147 | 0.022713778 | 0.502996595 | 3.55201016  | 0.083691709  | 0.999998753 NA |
| ASV_16s_45148 | 0.022713778 | 0.502996595 | 3.55201016  | 0.083691709  | 0.999998753 NA |
| ASV_16s_45149 | 0.022713778 | 0.502996595 | 3.55201016  | 0.083691709  | 0.999998753 NA |
| ASV_16s_45150 | 0.022713778 | 0.502996595 | 3.55201016  | 0.083691709  | 0.999998753 NA |
| ASV_16s_45151 | 0.022713778 | 0.502996595 | 3.55201016  | 0.083691709  | 0.999998753 NA |
| ASV_16s_45152 | 0.022713778 | 0.502996595 | 3.55201016  | 0.083691709  | 0.999998753 NA |
| ASV_16s_45153 | 0.022713778 | 0.502996595 | 3.55201016  | 0.083691709  | 0.999998753 NA |
| ASV_16s_45154 | 0.018091422 | 0.502996595 | 3.55201016  | 0.073568299  | 0.999999202 NA |
| ASV_16s_45155 | 0.018091422 | 0.502996595 | 3.55201016  | 0.073568299  | 0.999999202 NA |
| ASV_16s_45156 | 0.018091422 | 0.502996595 | 3.55201016  | 0.073568299  | 0.999999202 NA |
| ASV_16s_45157 | 0.018091422 | 0.502996595 | 3.55201016  | 0.073568299  | 0.999999202 NA |
| ASV_16s_45158 | 0.018091422 | 0.502996595 | 3.55201016  | 0.073568299  | 0.999999202 NA |
| ASV_16s_45159 | 0.018091422 | 0.502996595 | 3.55201016  | 0.073568299  | 0.999999202 NA |
| ASV_16s_45160 | 0.018091422 | 0.502996595 | 3.55201016  | 0.073568299  | 0.999999202 NA |
| ASV_16s_45161 | 0.01932071  | 0.502996595 | 3.55201016  | 0.076268638  | 0.999999096 NA |
| ASV_16s_45162 | 0.01932071  | 0.502996595 | 3.55201016  | 0.076268638  | 0.999999096 NA |
| ASV_16s_45163 | 0.01932071  | 0.502996595 | 3.55201016  | 0.076268638  | 0.999999096 NA |
| ASV_16s_45164 | 0.01932071  | 0.502996595 | 3.55201016  | 0.076268638  | 0.999999096 NA |
| ASV_16s_45165 | 0.020356929 | 0.502996595 | 3.55201016  | 0.078540314  | 0.999998999 NA |





















|               |             |             |             |             |                |
|---------------|-------------|-------------|-------------|-------------|----------------|
| ASV_16s_45769 | 0.03208782  | 0.307414917 | 3.551973691 | 0.116909    | 0.999996033 NA |
| ASV_16s_45770 | 0.004881989 | 0.313013041 | 3.551991484 | 0.046876011 | 0.999999834 NA |
| ASV_16s_45771 | 0.004881989 | 0.313013041 | 3.551991484 | 0.046876011 | 0.999999834 NA |
| ASV_16s_45772 | 0.008080085 | 0.31059511  | 3.551983447 | 0.062486028 | 0.999999548 NA |
| ASV_16s_45773 | 0.028882914 | 0.307414917 | 3.551973691 | 0.107230579 | 0.999997057 NA |
| ASV_16s_45774 | 0.028882914 | 0.307414917 | 3.551973691 | 0.107230579 | 0.999997057 NA |
| ASV_16s_45775 | 0.01133021  | 0.308432404 | 3.551976715 | 0.060189948 | 0.999999603 NA |
| ASV_16s_45776 | 0.01133021  | 0.308432404 | 3.551976715 | 0.060189948 | 0.999999603 NA |
| ASV_16s_45777 | 0.01133021  | 0.308432404 | 3.551976715 | 0.060189948 | 0.999999603 NA |
| ASV_16s_45778 | 0.022790207 | 0.307414917 | 3.551973691 | 0.088664303 | 0.999998476 NA |
| ASV_16s_45779 | 0.022790207 | 0.307414917 | 3.551973691 | 0.088664303 | 0.999998476 NA |
| ASV_16s_45780 | 0.026765254 | 0.11851285  | 3.551943657 | 0.102353243 | 0.999997495 NA |
| ASV_16s_45781 | 0.026765254 | 0.11851285  | 3.551943657 | 0.102353243 | 0.999997495 NA |
| ASV_16s_45782 | 0.026765254 | 0.11851285  | 3.551943657 | 0.102353243 | 0.999997495 NA |
| ASV_16s_45783 | 0.026765254 | 0.11851285  | 3.551943657 | 0.102353243 | 0.999997495 NA |
| ASV_16s_45784 | 0.026765254 | 0.11851285  | 3.551943657 | 0.102353243 | 0.999997495 NA |
| ASV_16s_45785 | 0.026765254 | 0.11851285  | 3.551943657 | 0.102353243 | 0.999997495 NA |
| ASV_16s_45786 | 0.032237766 | 0.11851285  | 3.551943657 | 0.117483787 | 0.999995965 NA |
| ASV_16s_45787 | 0.032237766 | 0.11851285  | 3.551943657 | 0.117483787 | 0.999995965 NA |
| ASV_16s_45788 | 0.032237766 | 0.11851285  | 3.551943657 | 0.117483787 | 0.999995965 NA |
| ASV_16s_45789 | 0.032237766 | 0.11851285  | 3.551943657 | 0.117483787 | 0.999995965 NA |
| ASV_16s_45790 | 0.035745537 | 0.118512849 | 3.551943657 | 0.127093516 | 0.999994706 NA |
| ASV_16s_45791 | 0.035745537 | 0.118512849 | 3.551943657 | 0.127093516 | 0.999994706 NA |
| ASV_16s_45792 | 0.035745537 | 0.118512849 | 3.551943657 | 0.127093516 | 0.999994706 NA |
| ASV_16s_45793 | 0.035745537 | 0.118512849 | 3.551943657 | 0.127093516 | 0.999994706 NA |
| ASV_16s_45794 | 0.01375127  | 0.11851285  | 3.551943657 | 0.065679139 | 0.999999462 NA |
| ASV_16s_45795 | 0.01375127  | 0.11851285  | 3.551943657 | 0.065679139 | 0.999999462 NA |
| ASV_16s_45796 | 0.01375127  | 0.11851285  | 3.551943657 | 0.065679139 | 0.999999462 NA |
| ASV_16s_45797 | 0.01375127  | 0.11851285  | 3.551943657 | 0.065679139 | 0.999999462 NA |
| ASV_16s_45798 | 0.01375127  | 0.11851285  | 3.551943657 | 0.065679139 | 0.999999462 NA |
| ASV_16s_45799 | 0.004938727 | 0.217725849 | 3.551973431 | 0.049302904 | 0.999999802 NA |
| ASV_16s_45800 | 0.004938727 | 0.217725849 | 3.551973431 | 0.049302904 | 0.999999802 NA |
| ASV_16s_45801 | 0.045754666 | 0.489951811 | 3.551965674 | 0.136051929 | 0.999993305 NA |
| ASV_16s_45802 | 0.045754666 | 0.489951811 | 3.551965674 | 0.136051929 | 0.999993305 NA |
| ASV_16s_45803 | 0.045754666 | 0.489951811 | 3.551965674 | 0.136051929 | 0.999993305 NA |
| ASV_16s_45804 | 0.041600993 | 0.489951811 | 3.551965674 | 0.125948781 | 0.999994869 NA |
| ASV_16s_45805 | 0.041600993 | 0.489951811 | 3.551965674 | 0.125948781 | 0.999994869 NA |
| ASV_16s_45806 | 0.041600993 | 0.489951811 | 3.551965674 | 0.125948781 | 0.999994869 NA |
| ASV_16s_45807 | 0.041600993 | 0.489951811 | 3.551965674 | 0.125948781 | 0.999994869 NA |
| ASV_16s_45808 | 0.041600993 | 0.489951811 | 3.551965674 | 0.125948781 | 0.999994869 NA |
| ASV_16s_45809 | 0.041600993 | 0.489951811 | 3.551965674 | 0.125948781 | 0.999994869 NA |
| ASV_16s_45810 | 0.030924642 | 0.131258704 | 3.551984143 | 0.10961715  | 0.999996824 NA |
| ASV_16s_45811 | 0.030924642 | 0.131258704 | 3.551984143 | 0.10961715  | 0.999996824 NA |
| ASV_16s_45812 | 0.036864941 | 0.131258704 | 3.551984143 | 0.122742141 | 0.999995306 NA |
| ASV_16s_45813 | 0.036864941 | 0.131258704 | 3.551984143 | 0.122742141 | 0.999995306 NA |
| ASV_16s_45814 | 0.036864941 | 0.131258704 | 3.551984143 | 0.122742141 | 0.999995306 NA |
| ASV_16s_45815 | 0.036864941 | 0.131258704 | 3.551984143 | 0.122742141 | 0.999995306 NA |
| ASV_16s_45816 | 0.036864941 | 0.131258704 | 3.551984143 | 0.122742141 | 0.999995306 NA |
| ASV_16s_45817 | 0.036864941 | 0.131258704 | 3.551984143 | 0.122742141 | 0.999995306 NA |
| ASV_16s_45818 | 0.036864941 | 0.131258704 | 3.551984143 | 0.122742141 | 0.999995306 NA |
| ASV_16s_45819 | 0.036864941 | 0.131258704 | 3.551984143 | 0.122742141 | 0.999995306 NA |
| ASV_16s_45820 | 0.036864941 | 0.131258704 | 3.551984143 | 0.122742141 | 0.999995306 NA |
| ASV_16s_45821 | 0.036864941 | 0.131258704 | 3.551984143 | 0.122742141 | 0.999995306 NA |
| ASV_16s_45822 | 0.036864941 | 0.131258704 | 3.551984143 | 0.122742141 | 0.999995306 NA |
| ASV_16s_45823 | 0.036864941 | 0.131258704 | 3.551984143 | 0.122742141 | 0.999995306 NA |
| ASV_16s_45824 | 0.036864941 | 0.131258704 | 3.551984143 | 0.122742141 | 0.999995306 NA |
| ASV_16s_45825 | 0.036864941 | 0.131258704 | 3.551984143 | 0.122742141 | 0.999995306 NA |
| ASV_16s_45826 | 0.036864941 | 0.131258704 | 3.551984143 | 0.122742141 | 0.999995306 NA |
| ASV_16s_45827 | 0.036864941 | 0.131258704 | 3.551984143 | 0.122742141 | 0.999995306 NA |
| ASV_16s_45828 | 0.036864941 | 0.131258704 | 3.551984143 | 0.122742141 | 0.999995306 NA |
| ASV_16s_45829 | 0.036864941 | 0.131258704 | 3.551984143 | 0.122742141 | 0.999995306 NA |
| ASV_16s_45830 | 0.036864941 | 0.131258704 | 3.551984143 | 0.122742141 | 0.999995306 NA |
| ASV_16s_45831 | 0.036864941 | 0.131258704 | 3.551984143 | 0.122742141 | 0.999995306 NA |
| ASV_16s_45832 | 0.036864941 | 0.131258704 | 3.551984143 | 0.122742141 | 0.999995306 NA |
| ASV_16s_45833 | 0.036864941 | 0.131258704 | 3.551984143 | 0.122742141 | 0.999995306 NA |
| ASV_16s_45834 | 0.036864941 | 0.131258704 | 3.551984143 | 0.122742141 | 0.999995306 NA |
| ASV_16s_45835 | 0.036864941 | 0.131258704 | 3.551984143 | 0.122742141 | 0.999995306 NA |











































































|               |             |             |             |              |                |
|---------------|-------------|-------------|-------------|--------------|----------------|
| ASV_16s_47980 | 0.003904833 | 0.16633953  | 3.551925876 | -0.025319621 | 1 NA           |
| ASV_16s_47981 | 0.003463615 | 0.166339701 | 3.551925876 | -0.026200437 | 1 NA           |
| ASV_16s_47982 | 0.003463615 | 0.166339701 | 3.551925876 | -0.026200437 | 1 NA           |
| ASV_16s_47983 | 0.01015856  | 0.177847425 | 3.551989999 | 0.056834381  | 0.999999675 NA |
| ASV_16s_47984 | 0.007933186 | 0.31363357  | 3.55198174  | -0.0360651   | 1 NA           |
| ASV_16s_47985 | 0.007933186 | 0.31363357  | 3.55198174  | -0.0360651   | 1 NA           |
| ASV_16s_47986 | 0.007933186 | 0.31363357  | 3.55198174  | -0.0360651   | 1 NA           |
| ASV_16s_47987 | 0.005443472 | 0.313633603 | 3.55198174  | -0.02327267  | 1 NA           |
| ASV_16s_47988 | 0.005443472 | 0.313633603 | 3.55198174  | -0.02327267  | 1 NA           |
| ASV_16s_47991 | 0.01911364  | 0.449821894 | 3.551977065 | -0.103271851 | 1 NA           |
| ASV_16s_47992 | 0.01911364  | 0.449821894 | 3.551977065 | -0.103271851 | 1 NA           |
| ASV_16s_47993 | 0.01911364  | 0.449821894 | 3.551977065 | -0.103271851 | 1 NA           |
| ASV_16s_47994 | 0.01911364  | 0.449821894 | 3.551977065 | -0.103271851 | 1 NA           |
| ASV_16s_47995 | 0.01911364  | 0.449821894 | 3.551977065 | -0.103271851 | 1 NA           |
| ASV_16s_47996 | 0.01911364  | 0.449821894 | 3.551977065 | -0.103271851 | 1 NA           |
| ASV_16s_47997 | 0.01911364  | 0.449821894 | 3.551977065 | -0.103271851 | 1 NA           |
| ASV_16s_47998 | 0.01911364  | 0.449821894 | 3.551977065 | -0.103271851 | 1 NA           |
| ASV_16s_47999 | 0.01911364  | 0.449821894 | 3.551977065 | -0.103271851 | 1 NA           |
| ASV_16s_48000 | 0.01911364  | 0.449821894 | 3.551977065 | -0.103271851 | 1 NA           |
| ASV_16s_48001 | 0.01911364  | 0.449821894 | 3.551977065 | -0.103271851 | 1 NA           |
| ASV_16s_48002 | 0.008672211 | 0.4498224   | 3.551977065 | -0.032007936 | 1 NA           |
| ASV_16s_48003 | 0.008672211 | 0.4498224   | 3.551977065 | -0.032007936 | 1 NA           |
| ASV_16s_48004 | 0.008672211 | 0.4498224   | 3.551977065 | -0.032007936 | 1 NA           |
| ASV_16s_48005 | 0.008672211 | 0.4498224   | 3.551977065 | -0.032007936 | 1 NA           |
| ASV_16s_48006 | 0.017220055 | 0.456102559 | 3.552012935 | 0.066186898  | 0.999999448 NA |
| ASV_16s_48007 | 0.017220055 | 0.456102559 | 3.552012935 | 0.066186898  | 0.999999448 NA |
| ASV_16s_48008 | 0.017220055 | 0.456102559 | 3.552012935 | 0.066186898  | 0.999999448 NA |
| ASV_16s_48009 | 0.017220055 | 0.456102559 | 3.552012935 | 0.066186898  | 0.999999448 NA |
| ASV_16s_48010 | 0.017220055 | 0.456102559 | 3.552012935 | 0.066186898  | 0.999999448 NA |
| ASV_16s_48011 | 0.017220055 | 0.456102559 | 3.552012935 | 0.066186898  | 0.999999448 NA |
| ASV_16s_48012 | 0.017220055 | 0.456102559 | 3.552012935 | 0.066186898  | 0.999999448 NA |
| ASV_16s_48013 | 0.017220055 | 0.456102559 | 3.552012935 | 0.066186898  | 0.999999448 NA |
| ASV_16s_48014 | 0.013518966 | 0.456102559 | 3.552012935 | 0.058979809  | 0.99999963 NA  |
| ASV_16s_48015 | 0.013518966 | 0.456102559 | 3.552012935 | 0.058979809  | 0.99999963 NA  |
| ASV_16s_48016 | 0.013518966 | 0.456102559 | 3.552012935 | 0.058979809  | 0.99999963 NA  |
| ASV_16s_48017 | 0.013518966 | 0.456102559 | 3.552012935 | 0.058979809  | 0.99999963 NA  |
| ASV_16s_48018 | 0.013518966 | 0.456102559 | 3.552012935 | 0.058979809  | 0.99999963 NA  |
| ASV_16s_48019 | 0.013518966 | 0.456102559 | 3.552012935 | 0.058979809  | 0.99999963 NA  |
| ASV_16s_48020 | 0.013518966 | 0.456102559 | 3.552012935 | 0.058979809  | 0.99999963 NA  |
| ASV_16s_48021 | 0.013518966 | 0.456102559 | 3.552012935 | 0.058979809  | 0.99999963 NA  |
| ASV_16s_48022 | 0.016077827 | 0.451717919 | 3.551994239 | 0.064107184  | 0.999999506 NA |
| ASV_16s_48023 | 0.020749813 | 0.315436847 | 3.55199862  | 0.079327151  | 0.999998964 NA |
| ASV_16s_48024 | 0.020749813 | 0.315436847 | 3.55199862  | 0.079327151  | 0.999998964 NA |
| ASV_16s_48025 | 0.020749813 | 0.315436847 | 3.55199862  | 0.079327151  | 0.999998964 NA |
| ASV_16s_48026 | 0.020749813 | 0.315436847 | 3.55199862  | 0.079327151  | 0.999998964 NA |
| ASV_16s_48027 | 0.020749813 | 0.315436847 | 3.55199862  | 0.079327151  | 0.999998964 NA |
| ASV_16s_48028 | 0.020749813 | 0.315436847 | 3.55199862  | 0.079327151  | 0.999998964 NA |
| ASV_16s_48029 | 0.016423245 | 0.315436847 | 3.55199862  | 0.069290971  | 0.999999352 NA |
| ASV_16s_48030 | 0.016423245 | 0.315436847 | 3.55199862  | 0.069290971  | 0.999999352 NA |
| ASV_16s_48031 | 0.022025302 | 0.315436847 | 3.55199862  | 0.082262555  | 0.999998825 NA |
| ASV_16s_48032 | 0.022025302 | 0.315436847 | 3.55199862  | 0.082262555  | 0.999998825 NA |
| ASV_16s_48033 | 0.022025302 | 0.315436847 | 3.55199862  | 0.082262555  | 0.999998825 NA |
| ASV_16s_48034 | 0.022025302 | 0.315436847 | 3.55199862  | 0.082262555  | 0.999998825 NA |
| ASV_16s_48035 | 0.02642319  | 0.315436847 | 3.55199862  | 0.092303606  | 0.999998248 NA |
| ASV_16s_48036 | 0.027531021 | 0.315436847 | 3.55199862  | 0.09481353   | 0.999998078 NA |
| ASV_16s_48037 | 0.027531021 | 0.315436847 | 3.55199862  | 0.09481353   | 0.999998078 NA |
| ASV_16s_48038 | 0.020653108 | 0.315436847 | 3.55199862  | 0.079104164  | 0.999998974 NA |
| ASV_16s_48039 | 0.009459886 | 0.315436847 | 3.55199862  | 0.052877311  | 0.999999747 NA |
| ASV_16s_48040 | 0.020036682 | 0.315436847 | 3.55199862  | 0.077681355  | 0.999999037 NA |
| ASV_16s_48041 | 0.009752073 | 0.173508651 | 3.551972792 | 0.056140852  | 0.999999688 NA |
| ASV_16s_48042 | 0.017035334 | 0.456102493 | 3.552012936 | 0.066049001  | 0.999999452 NA |
| ASV_16s_48043 | 0.017035334 | 0.456102493 | 3.552012936 | 0.066049001  | 0.999999452 NA |
| ASV_16s_48044 | 0.017035334 | 0.456102493 | 3.552012936 | 0.066049001  | 0.999999452 NA |
| ASV_16s_48045 | 0.017035334 | 0.456102493 | 3.552012936 | 0.066049001  | 0.999999452 NA |
| ASV_16s_48046 | 0.013568567 | 0.456102493 | 3.552012936 | 0.059292447  | 0.999999623 NA |
| ASV_16s_48047 | 0.013568567 | 0.456102493 | 3.552012936 | 0.059292447  | 0.999999623 NA |
| ASV_16s_48048 | 0.013568567 | 0.456102493 | 3.552012936 | 0.059292447  | 0.999999623 NA |





























































































































|               |             |             |             |              |             |    |
|---------------|-------------|-------------|-------------|--------------|-------------|----|
| ASV_16s_51734 | 0.012445013 | 0.22154445  | 3.551983904 | 0.055873896  | 0.999999693 | NA |
| ASV_16s_51735 | 0.012445013 | 0.22154445  | 3.551983904 | 0.055873896  | 0.999999693 | NA |
| ASV_16s_51736 | 0.012445013 | 0.22154445  | 3.551983904 | 0.055873896  | 0.999999693 | NA |
| ASV_16s_51737 | 0.012445013 | 0.22154445  | 3.551983904 | 0.055873896  | 0.999999693 | NA |
| ASV_16s_51738 | 0.012445013 | 0.22154445  | 3.551983904 | 0.055873896  | 0.999999693 | NA |
| ASV_16s_51739 | 0.012445013 | 0.22154445  | 3.551983904 | 0.055873896  | 0.999999693 | NA |
| ASV_16s_51740 | 0.012445013 | 0.22154445  | 3.551983904 | 0.055873896  | 0.999999693 | NA |
| ASV_16s_51741 | 0.012445013 | 0.22154445  | 3.551983904 | 0.055873896  | 0.999999693 | NA |
| ASV_16s_51742 | 0.012445013 | 0.22154445  | 3.551983904 | 0.055873896  | 0.999999693 | NA |
| ASV_16s_51743 | 0.012445013 | 0.22154445  | 3.551983904 | 0.055873896  | 0.999999693 | NA |
| ASV_16s_51744 | 0.012445013 | 0.22154445  | 3.551983904 | 0.055873896  | 0.999999693 | NA |
| ASV_16s_51745 | 0.018040307 | 0.406565517 | 3.55200144  | 0.062471076  | 0.999999548 | NA |
| ASV_16s_51746 | 0.018040307 | 0.406565517 | 3.55200144  | 0.062471076  | 0.999999548 | NA |
| ASV_16s_51747 | 0.018040307 | 0.406565517 | 3.55200144  | 0.062471076  | 0.999999548 | NA |
| ASV_16s_51748 | 0.002603222 | 0.221252164 | 3.551977116 | -0.013786432 | 1           | NA |
| ASV_16s_51749 | 0.002309077 | 0.22125217  | 3.551977116 | -0.013527502 | 1           | NA |
| ASV_16s_51750 | 0.002309077 | 0.22125217  | 3.551977116 | -0.013527502 | 1           | NA |
| ASV_16s_51751 | 0.001809453 | 0.221252199 | 3.551977116 | -0.013231995 | 1           | NA |
| ASV_16s_51752 | 0.00156848  | 0.231207616 | 3.551982616 | -0.009946547 | 1           | NA |
| ASV_16s_51753 | 0.005288791 | 0.317508046 | 3.552005031 | -0.028842356 | 1           | NA |
| ASV_16s_51754 | 0.005288791 | 0.317508046 | 3.552005031 | -0.028842356 | 1           | NA |
| ASV_16s_51755 | 0.005288791 | 0.317508046 | 3.552005031 | -0.028842356 | 1           | NA |
| ASV_16s_51756 | 0.005288791 | 0.317508046 | 3.552005031 | -0.028842356 | 1           | NA |
| ASV_16s_51757 | 0.005288791 | 0.317508046 | 3.552005031 | -0.028842356 | 1           | NA |
| ASV_16s_51758 | 0.003628981 | 0.317508047 | 3.552005031 | -0.014666162 | 1           | NA |
| ASV_16s_51760 | 0.012742427 | 0.407894305 | 3.55200467  | -0.089110312 | 1           | NA |
| ASV_16s_51761 | 0.012742427 | 0.407894305 | 3.55200467  | -0.089110312 | 1           | NA |
| ASV_16s_51762 | 0.012742427 | 0.407894305 | 3.55200467  | -0.089110312 | 1           | NA |
| ASV_16s_51763 | 0.012742427 | 0.407894305 | 3.55200467  | -0.089110312 | 1           | NA |
| ASV_16s_51764 | 0.012742427 | 0.407894305 | 3.55200467  | -0.089110312 | 1           | NA |
| ASV_16s_51765 | 0.00377701  | 0.407894312 | 3.55200467  | -0.013165277 | 1           | NA |
| ASV_16s_51766 | 0.005781474 | 0.40789431  | 3.55200467  | -0.024960545 | 1           | NA |
| ASV_16s_51767 | 0.005781474 | 0.40789431  | 3.55200467  | -0.024960545 | 1           | NA |
| ASV_16s_51768 | 0.011480036 | 0.40947167  | 3.552014244 | 0.044734324  | 0.999999859 | NA |
| ASV_16s_51769 | 0.011480036 | 0.40947167  | 3.552014244 | 0.044734324  | 0.999999859 | NA |
| ASV_16s_51770 | 0.011480036 | 0.40947167  | 3.552014244 | 0.044734324  | 0.999999859 | NA |
| ASV_16s_51771 | 0.011480036 | 0.40947167  | 3.552014244 | 0.044734324  | 0.999999859 | NA |
| ASV_16s_51772 | 0.011480036 | 0.40947167  | 3.552014244 | 0.044734324  | 0.999999859 | NA |
| ASV_16s_51773 | 0.009012644 | 0.40947167  | 3.552014244 | 0.041889524  | 0.999999888 | NA |
| ASV_16s_51774 | 0.009012644 | 0.40947167  | 3.552014244 | 0.041889524  | 0.999999888 | NA |
| ASV_16s_51775 | 0.010718552 | 0.406565517 | 3.55200144  | 0.049599306  | 0.999999797 | NA |
| ASV_16s_51776 | 0.010718552 | 0.406565517 | 3.55200144  | 0.049599306  | 0.999999797 | NA |
| ASV_16s_51777 | 0.013833209 | 0.316162425 | 3.552001599 | 0.05808051   | 0.999999649 | NA |
| ASV_16s_51778 | 0.013833209 | 0.316162425 | 3.552001599 | 0.05808051   | 0.999999649 | NA |
| ASV_16s_51779 | 0.013833209 | 0.316162425 | 3.552001599 | 0.05808051   | 0.999999649 | NA |
| ASV_16s_51780 | 0.01094883  | 0.316162425 | 3.552001599 | 0.052254492  | 0.999999757 | NA |
| ASV_16s_51781 | 0.01094883  | 0.316162425 | 3.552001599 | 0.052254492  | 0.999999757 | NA |
| ASV_16s_51782 | 0.014683535 | 0.316162425 | 3.552001599 | 0.059783767  | 0.999999612 | NA |
| ASV_16s_51783 | 0.014683535 | 0.316162425 | 3.552001599 | 0.059783767  | 0.999999612 | NA |
| ASV_16s_51784 | 0.014683535 | 0.316162425 | 3.552001599 | 0.059783767  | 0.999999612 | NA |
| ASV_16s_51785 | 0.014683535 | 0.316162425 | 3.552001599 | 0.059783767  | 0.999999612 | NA |
| ASV_16s_51786 | 0.014683535 | 0.316162425 | 3.552001599 | 0.059783767  | 0.999999612 | NA |
| ASV_16s_51787 | 0.01761546  | 0.316162425 | 3.552001599 | 0.065607489  | 0.999999464 | NA |
| ASV_16s_51788 | 0.01761546  | 0.316162425 | 3.552001599 | 0.065607489  | 0.999999464 | NA |
| ASV_16s_51789 | 0.018354014 | 0.316162425 | 3.552001599 | 0.067062604  | 0.999999422 | NA |
| ASV_16s_51790 | 0.018354014 | 0.316162425 | 3.552001599 | 0.067062604  | 0.999999422 | NA |
| ASV_16s_51791 | 0.013825244 | 0.316162425 | 3.552001599 | 0.058064525  | 0.99999965  | NA |
| ASV_16s_51792 | 0.013825244 | 0.316162425 | 3.552001599 | 0.058064525  | 0.99999965  | NA |
| ASV_16s_51793 | 0.013825244 | 0.316162425 | 3.552001599 | 0.058064525  | 0.99999965  | NA |
| ASV_16s_51794 | 0.013768738 | 0.316162425 | 3.552001599 | 0.057951108  | 0.999999652 | NA |
| ASV_16s_51795 | 0.00630659  | 0.316162425 | 3.552001599 | 0.042717793  | 0.99999988  | NA |
| ASV_16s_51796 | 0.00630659  | 0.316162425 | 3.552001599 | 0.042717793  | 0.99999988  | NA |
| ASV_16s_51797 | 0.00630659  | 0.316162425 | 3.552001599 | 0.042717793  | 0.99999988  | NA |
| ASV_16s_51798 | 0.013357788 | 0.316162425 | 3.552001599 | 0.057125394  | 0.999999669 | NA |
| ASV_16s_51799 | 0.013357788 | 0.316162425 | 3.552001599 | 0.057125394  | 0.999999669 | NA |
| ASV_16s_51800 | 0.006501382 | 0.22154445  | 3.551983904 | 0.044857728  | 0.999999857 | NA |
| ASV_16s_51801 | 0.006501382 | 0.22154445  | 3.551983904 | 0.044857728  | 0.999999857 | NA |





|               |             |             |             |             |                |
|---------------|-------------|-------------|-------------|-------------|----------------|
| ASV_16s_51936 | 0.014573452 | 0.412463956 | 3.551997335 | 0.031751816 | 0.999999957 NA |
| ASV_16s_51937 | 0.014262668 | 0.412463956 | 3.551997335 | 0.031691148 | 0.999999957 NA |
| ASV_16s_51938 | 0.014262668 | 0.412463956 | 3.551997335 | 0.031691148 | 0.999999957 NA |
| ASV_16s_51939 | 0.014262668 | 0.412463956 | 3.551997335 | 0.031691148 | 0.999999957 NA |
| ASV_16s_51940 | 0.009089875 | 0.412463956 | 3.551997335 | 0.030669439 | 0.999999962 NA |
| ASV_16s_51941 | 0.009089875 | 0.412463956 | 3.551997335 | 0.030669439 | 0.999999962 NA |
| ASV_16s_51942 | 0.009089875 | 0.412463956 | 3.551997335 | 0.030669439 | 0.999999962 NA |
| ASV_16s_51943 | 0.009089875 | 0.412463956 | 3.551997335 | 0.030669439 | 0.999999962 NA |
| ASV_16s_51944 | 0.009089875 | 0.412463956 | 3.551997335 | 0.030669439 | 0.999999962 NA |
| ASV_16s_51945 | 0.009089875 | 0.412463956 | 3.551997335 | 0.030669439 | 0.999999962 NA |
| ASV_16s_51946 | 0.009089875 | 0.412463956 | 3.551997335 | 0.030669439 | 0.999999962 NA |
| ASV_16s_51947 | 0.012528295 | 0.412463956 | 3.551997335 | 0.031351101 | 0.999999959 NA |
| ASV_16s_51948 | 0.012528295 | 0.412463956 | 3.551997335 | 0.031351101 | 0.999999959 NA |
| ASV_16s_51949 | 0.012528295 | 0.412463956 | 3.551997335 | 0.031351101 | 0.999999959 NA |
| ASV_16s_51950 | 0.012528295 | 0.412463956 | 3.551997335 | 0.031351101 | 0.999999959 NA |
| ASV_16s_51951 | 0.012528295 | 0.412463956 | 3.551997335 | 0.031351101 | 0.999999959 NA |
| ASV_16s_51952 | 0.012528295 | 0.412463956 | 3.551997335 | 0.031351101 | 0.999999959 NA |
| ASV_16s_51953 | 0.014132669 | 0.320709141 | 3.552005029 | 0.031888403 | 0.999999957 NA |
| ASV_16s_51954 | 0.014132669 | 0.320709141 | 3.552005029 | 0.031888403 | 0.999999957 NA |
| ASV_16s_51955 | 0.014132669 | 0.320709141 | 3.552005029 | 0.031888403 | 0.999999957 NA |
| ASV_16s_51956 | 0.011489839 | 0.320709141 | 3.552005029 | 0.031320396 | 0.999999959 NA |
| ASV_16s_51957 | 0.011489839 | 0.320709141 | 3.552005029 | 0.031320396 | 0.999999959 NA |
| ASV_16s_51958 | 0.011489839 | 0.320709141 | 3.552005029 | 0.031320396 | 0.999999959 NA |
| ASV_16s_51959 | 0.009463713 | 0.320709141 | 3.552005029 | 0.03087989  | 0.999999961 NA |
| ASV_16s_51960 | 0.007812183 | 0.320709141 | 3.552005029 | 0.030517537 | 0.999999963 NA |
| ASV_16s_51961 | 0.013382627 | 0.320709141 | 3.552005029 | 0.031727951 | 0.999999957 NA |
| ASV_16s_51962 | 0.013382627 | 0.320709141 | 3.552005029 | 0.031727951 | 0.999999957 NA |
| ASV_16s_51963 | 0.013382627 | 0.320709141 | 3.552005029 | 0.031727951 | 0.999999957 NA |
| ASV_16s_51964 | 0.013382627 | 0.320709141 | 3.552005029 | 0.031727951 | 0.999999957 NA |
| ASV_16s_51965 | 0.013382627 | 0.320709141 | 3.552005029 | 0.031727951 | 0.999999957 NA |
| ASV_16s_51966 | 0.013382627 | 0.320709141 | 3.552005029 | 0.031727951 | 0.999999957 NA |
| ASV_16s_51967 | 0.013382627 | 0.320709141 | 3.552005029 | 0.031727951 | 0.999999957 NA |
| ASV_16s_51968 | 0.013382627 | 0.320709141 | 3.552005029 | 0.031727951 | 0.999999957 NA |
| ASV_16s_51969 | 0.013382627 | 0.320709141 | 3.552005029 | 0.031727951 | 0.999999957 NA |
| ASV_16s_51970 | 0.008452505 | 0.320709141 | 3.552005029 | 0.03065838  | 0.999999962 NA |
| ASV_16s_51971 | 0.016315846 | 0.320709141 | 3.552005029 | 0.032352097 | 0.999999954 NA |
| ASV_16s_51972 | 0.016315846 | 0.320709141 | 3.552005029 | 0.032352097 | 0.999999954 NA |
| ASV_16s_51973 | 0.00294309  | 0.319694356 | 3.552007119 | 0.028567464 | 0.999999997 NA |
| ASV_16s_51974 | 0.011857706 | 0.320709141 | 3.552005029 | 0.031399903 | 0.999999959 NA |
| ASV_16s_51975 | 0.010718552 | 0.226044408 | 3.551986761 | 0.029773599 | 0.999999966 NA |
| ASV_16s_51976 | 0.010718552 | 0.226044408 | 3.551986761 | 0.029773599 | 0.999999966 NA |
| ASV_16s_51977 | 0.00474897  | 0.226044408 | 3.551986761 | 0.030886612 | 0.999999961 NA |
| ASV_16s_51978 | 0.011649627 | 0.226044408 | 3.551986761 | 0.029603127 | 0.999999966 NA |
| ASV_16s_51979 | 0.015027304 | 0.226044408 | 3.551986761 | 0.028991592 | 0.999999969 NA |
| ASV_16s_51980 | 0.015027304 | 0.226044408 | 3.551986761 | 0.028991592 | 0.999999969 NA |
| ASV_16s_51981 | 0.016274681 | 0.226044408 | 3.551986761 | 0.028768444 | 0.999999997 NA |
| ASV_16s_51982 | 0.016274681 | 0.226044408 | 3.551986761 | 0.028768444 | 0.999999997 NA |
| ASV_16s_51983 | 0.014348554 | 0.226044408 | 3.551986761 | 0.029113622 | 0.999999968 NA |
| ASV_16s_51984 | 0.014348554 | 0.226044408 | 3.551986761 | 0.029113622 | 0.999999968 NA |
| ASV_16s_51985 | 0.014348554 | 0.226044408 | 3.551986761 | 0.029113622 | 0.999999968 NA |
| ASV_16s_51986 | 0.014348554 | 0.226044408 | 3.551986761 | 0.029113622 | 0.999999968 NA |
| ASV_16s_51987 | 0.005767515 | 0.226044408 | 3.551986761 | 0.030694216 | 0.999999962 NA |
| ASV_16s_51988 | 0.005285803 | 0.226044408 | 3.551986761 | 0.030785079 | 0.999999962 NA |
| ASV_16s_51989 | 0.005285803 | 0.226044408 | 3.551986761 | 0.030785079 | 0.999999962 NA |
| ASV_16s_51990 | 0.005285803 | 0.226044408 | 3.551986761 | 0.030785079 | 0.999999962 NA |
| ASV_16s_51991 | 0.005285803 | 0.226044408 | 3.551986761 | 0.030785079 | 0.999999962 NA |
| ASV_16s_51992 | 0.009463713 | 0.226044408 | 3.551986761 | 0.030004667 | 0.999999965 NA |
| ASV_16s_51993 | 0.010425033 | 0.412463956 | 3.551997335 | 0.030935328 | 0.999999961 NA |
| ASV_16s_51994 | 0.010425033 | 0.412463956 | 3.551997335 | 0.030935328 | 0.999999961 NA |
| ASV_16s_51995 | 0.010425033 | 0.412463956 | 3.551997335 | 0.030935328 | 0.999999961 NA |
| ASV_16s_51996 | 0.010425033 | 0.412463956 | 3.551997335 | 0.030935328 | 0.999999961 NA |
| ASV_16s_51997 | 0.010425033 | 0.412463956 | 3.551997335 | 0.030935328 | 0.999999961 NA |
| ASV_16s_51998 | 0.009463713 | 0.224435909 | 3.551995987 | 0.043660695 | 0.999999987 NA |
| ASV_16s_51999 | 0.009463713 | 0.224435909 | 3.551995987 | 0.043660695 | 0.999999987 NA |
| ASV_16s_52000 | 0.009463713 | 0.224435909 | 3.551995987 | 0.043660695 | 0.999999987 NA |
| ASV_16s_52001 | 0.009463713 | 0.224435909 | 3.551995987 | 0.043660695 | 0.999999987 NA |
| ASV_16s_52002 | 0.009463713 | 0.224435909 | 3.551995987 | 0.043660695 | 0.999999987 NA |











|               |             |             |             |             |                |
|---------------|-------------|-------------|-------------|-------------|----------------|
| ASV_16s_52271 | 0.013382627 | 0.406565517 | 3.55200144  | 0.054325088 | 0.999999722 NA |
| ASV_16s_52272 | 0.013382627 | 0.406565517 | 3.55200144  | 0.054325088 | 0.999999722 NA |
| ASV_16s_52273 | 0.022691451 | 0.40310643  | 3.551990683 | 0.070511128 | 0.999999312 NA |
| ASV_16s_52274 | 0.022691451 | 0.40310643  | 3.551990683 | 0.070511128 | 0.999999312 NA |
| ASV_16s_52275 | 0.021437654 | 0.40310643  | 3.551990683 | 0.068137925 | 0.999999389 NA |
| ASV_16s_52276 | 0.021437654 | 0.40310643  | 3.551990683 | 0.068137925 | 0.999999389 NA |
| ASV_16s_52277 | 0.015992273 | 0.40310643  | 3.551990683 | 0.0576993   | 0.999999657 NA |
| ASV_16s_52278 | 0.010345322 | 0.40310643  | 3.551990683 | 0.046643019 | 0.999999836 NA |
| ASV_16s_52279 | 0.010345322 | 0.40310643  | 3.551990683 | 0.046643019 | 0.999999836 NA |
| ASV_16s_52280 | 0.010345322 | 0.40310643  | 3.551990683 | 0.046643019 | 0.999999836 NA |
| ASV_16s_52281 | 0.010345322 | 0.40310643  | 3.551990683 | 0.046643019 | 0.999999836 NA |
| ASV_16s_52282 | 0.010345322 | 0.40310643  | 3.551990683 | 0.046643019 | 0.999999836 NA |
| ASV_16s_52283 | 0.010345322 | 0.40310643  | 3.551990683 | 0.046643019 | 0.999999836 NA |
| ASV_16s_52284 | 0.019956751 | 0.40310643  | 3.551990683 | 0.065320359 | 0.999999472 NA |
| ASV_16s_52285 | 0.019956751 | 0.40310643  | 3.551990683 | 0.065320359 | 0.999999472 NA |
| ASV_16s_52286 | 0.019956751 | 0.40310643  | 3.551990683 | 0.065320359 | 0.999999472 NA |
| ASV_16s_52287 | 0.019956751 | 0.40310643  | 3.551990683 | 0.065320359 | 0.999999472 NA |
| ASV_16s_52288 | 0.019956751 | 0.40310643  | 3.551990683 | 0.065320359 | 0.999999472 NA |
| ASV_16s_52289 | 0.010103088 | 0.40310643  | 3.551990683 | 0.046163362 | 0.999999842 NA |
| ASV_16s_52290 | 0.007116109 | 0.312669521 | 3.551990307 | 0.041507017 | 0.999999891 NA |
| ASV_16s_52291 | 0.01604391  | 0.312669521 | 3.551990307 | 0.062409433 | 0.99999955 NA  |
| ASV_16s_52292 | 0.01604391  | 0.312669521 | 3.551990307 | 0.062409433 | 0.99999955 NA  |
| ASV_16s_52293 | 0.004905601 | 0.313013566 | 3.551991484 | 0.039032634 | 0.999999912 NA |
| ASV_16s_52294 | 0.006803324 | 0.312669521 | 3.551990307 | 0.040759644 | 0.999999898 NA |
| ASV_16s_52295 | 0.002440994 | 0.315164295 | 3.55199911  | 0.036659191 | 0.999999929 NA |
| ASV_16s_52296 | 0.002440994 | 0.315164295 | 3.55199911  | 0.036659191 | 0.999999929 NA |
| ASV_16s_52297 | 0.002440994 | 0.315164295 | 3.55199911  | 0.036659191 | 0.999999929 NA |
| ASV_16s_52298 | 0.004040043 | 0.313734151 | 3.551993988 | 0.04297682  | 0.999999877 NA |
| ASV_16s_52299 | 0.004040043 | 0.313734151 | 3.551993988 | 0.04297682  | 0.999999877 NA |
| ASV_16s_52300 | 0.004040043 | 0.313734151 | 3.551993988 | 0.04297682  | 0.999999877 NA |
| ASV_16s_52301 | 0.004040043 | 0.313734151 | 3.551993988 | 0.04297682  | 0.999999877 NA |
| ASV_16s_52302 | 0.014441457 | 0.312669521 | 3.551990307 | 0.058717788 | 0.999999636 NA |
| ASV_16s_52303 | 0.014441457 | 0.312669521 | 3.551990307 | 0.058717788 | 0.999999636 NA |
| ASV_16s_52304 | 0.014441457 | 0.312669521 | 3.551990307 | 0.058717788 | 0.999999636 NA |
| ASV_16s_52305 | 0.014441457 | 0.312669521 | 3.551990307 | 0.058717788 | 0.999999636 NA |
| ASV_16s_52306 | 0.014441457 | 0.312669521 | 3.551990307 | 0.058717788 | 0.999999636 NA |
| ASV_16s_52307 | 0.011395103 | 0.312669521 | 3.551990307 | 0.0516279   | 0.999999767 NA |
| ASV_16s_52308 | 0.013382627 | 0.218132837 | 3.551973563 | 0.056943781 | 0.999999673 NA |
| ASV_16s_52309 | 0.013382627 | 0.218132837 | 3.551973563 | 0.056943781 | 0.999999673 NA |
| ASV_16s_52310 | 0.035586485 | 0.218132837 | 3.551973563 | 0.101151155 | 0.999997595 NA |
| ASV_16s_52311 | 0.035586485 | 0.218132837 | 3.551973563 | 0.101151155 | 0.999997595 NA |
| ASV_16s_52312 | 0.016118883 | 0.218132837 | 3.551973563 | 0.062635234 | 0.999999544 NA |
| ASV_16s_52313 | 0.017872769 | 0.218132837 | 3.551973563 | 0.066245859 | 0.999999446 NA |
| ASV_16s_52314 | 0.006875635 | 0.218132837 | 3.551973563 | 0.043115436 | 0.999999876 NA |
| ASV_16s_52315 | 0.006875635 | 0.218132837 | 3.551973563 | 0.043115436 | 0.999999876 NA |
| ASV_16s_52316 | 0.006875635 | 0.218132837 | 3.551973563 | 0.043115436 | 0.999999876 NA |
| ASV_16s_52317 | 0.006875635 | 0.218132837 | 3.551973563 | 0.043115436 | 0.999999876 NA |
| ASV_16s_52318 | 0.006875635 | 0.218132837 | 3.551973563 | 0.043115436 | 0.999999876 NA |
| ASV_16s_52319 | 0.002612435 | 0.26045297  | 3.551987707 | 0.038243605 | 0.999999918 NA |
| ASV_16s_52320 | 0.023457576 | 0.218132837 | 3.551973563 | 0.077552363 | 0.999999042 NA |
| ASV_16s_52321 | 0.022877333 | 0.40310643  | 3.551990683 | 0.070862016 | 0.9999993 NA   |
| ASV_16s_52322 | 0.022877333 | 0.40310643  | 3.551990683 | 0.070862016 | 0.9999993 NA   |
| ASV_16s_52323 | 0.022877333 | 0.40310643  | 3.551990683 | 0.070862016 | 0.9999993 NA   |
| ASV_16s_52324 | 0.022877333 | 0.40310643  | 3.551990683 | 0.070862016 | 0.9999993 NA   |
| ASV_16s_52325 | 0.022877333 | 0.40310643  | 3.551990683 | 0.070862016 | 0.9999993 NA   |
| ASV_16s_52326 | 0.022877333 | 0.40310643  | 3.551990683 | 0.070862016 | 0.9999993 NA   |
| ASV_16s_52327 | 0.022877333 | 0.40310643  | 3.551990683 | 0.070862016 | 0.9999993 NA   |
| ASV_16s_52328 | 0.022877333 | 0.40310643  | 3.551990683 | 0.070862016 | 0.9999993 NA   |
| ASV_16s_52329 | 0.020800497 | 0.40310643  | 3.551990683 | 0.066927599 | 0.999999426 NA |
| ASV_16s_52330 | 0.020800497 | 0.40310643  | 3.551990683 | 0.066927599 | 0.999999426 NA |
| ASV_16s_52331 | 0.020800497 | 0.40310643  | 3.551990683 | 0.066927599 | 0.999999426 NA |
| ASV_16s_52332 | 0.020800497 | 0.40310643  | 3.551990683 | 0.066927599 | 0.999999426 NA |
| ASV_16s_52333 | 0.020800497 | 0.40310643  | 3.551990683 | 0.066927599 | 0.999999426 NA |
| ASV_16s_52334 | 0.020800497 | 0.40310643  | 3.551990683 | 0.066927599 | 0.999999426 NA |
| ASV_16s_52335 | 0.020800497 | 0.40310643  | 3.551990683 | 0.066927599 | 0.999999426 NA |
| ASV_16s_52336 | 0.020800497 | 0.40310643  | 3.551990683 | 0.066927599 | 0.999999426 NA |
| ASV_16s_52337 | 0.020800497 | 0.40310643  | 3.551990683 | 0.066927599 | 0.999999426 NA |



















































































|               |             |              |             |             |             |    |             |
|---------------|-------------|--------------|-------------|-------------|-------------|----|-------------|
| ASV_16s_54817 | 0.013877537 | 0.40947167   | 3.552014244 | 0.062196525 | 0.999999555 | NA |             |
| ASV_16s_54818 | 0.013877537 | 0.40947167   | 3.552014244 | 0.062196525 | 0.999999555 | NA |             |
| ASV_16s_54819 | 0.013877537 | 0.40947167   | 3.552014244 | 0.062196525 | 0.999999555 | NA |             |
| ASV_16s_54820 | 0.013877537 | 0.40947167   | 3.552014244 | 0.062196525 | 0.999999555 | NA |             |
| ASV_16s_54821 | 0.013877537 | 0.40947167   | 3.552014244 | 0.062196525 | 0.999999555 | NA |             |
| ASV_16s_54822 | 0.013877537 | 0.40947167   | 3.552014244 | 0.062196525 | 0.999999555 | NA |             |
| ASV_16s_54823 | 0.013877537 | 0.40947167   | 3.552014244 | 0.062196525 | 0.999999555 | NA |             |
| ASV_16s_54824 | 0.013877537 | 0.40947167   | 3.552014244 | 0.062196525 | 0.999999555 | NA |             |
| ASV_16s_54825 | 0.013877537 | 0.40947167   | 3.552014244 | 0.062196525 | 0.999999555 | NA |             |
| ASV_16s_54826 | 0.013877537 | 0.40947167   | 3.552014244 | 0.062196525 | 0.999999555 | NA |             |
| ASV_16s_54827 | 0.013877537 | 0.40947167   | 3.552014244 | 0.062196525 | 0.999999555 | NA |             |
| ASV_16s_54828 | 0.013877537 | 0.40947167   | 3.552014244 | 0.062196525 | 0.999999555 | NA |             |
| ASV_16s_54829 | 0.013877537 | 0.40947167   | 3.552014244 | 0.062196525 | 0.999999555 | NA |             |
| ASV_16s_54830 | 0.013877537 | 0.40947167   | 3.552014244 | 0.062196525 | 0.999999555 | NA |             |
| ASV_16s_54831 | 0.013877537 | 0.40947167   | 3.552014244 | 0.062196525 | 0.999999555 | NA |             |
| ASV_16s_54832 | 0.013877537 | 0.40947167   | 3.552014244 | 0.062196525 | 0.999999555 | NA |             |
| ASV_16s_54833 | 0.013877537 | 0.40947167   | 3.552014244 | 0.062196525 | 0.999999555 | NA |             |
| ASV_16s_54834 | 0.013877537 | 0.40947167   | 3.552014244 | 0.062196525 | 0.999999555 | NA |             |
| ASV_its_1     | 607.4498055 | 12.7076137   | 0.967987183 | 79.96915432 | 1.40E-14    |    | 1.17E-12    |
| ASV_its_2     | 207.1210608 | -4.765490767 | 0.887265465 | 50.65805214 | 1.07E-08    |    | 3.58E-07    |
| ASV_its_3     | 88.01274718 | -7.521800702 | 2.999559803 | 3.338809452 | NA          | NA |             |
| ASV_its_4     | 154.1176691 | 0.164773191  | 1.128185127 | 46.80494272 | 6.09E-08    |    | 1.72E-06    |
| ASV_its_5     | 222.4216493 | 1.677966736  | 0.981482586 | 88.55514102 | 2.45E-16    |    | 2.47E-14    |
| ASV_its_6     | 73.1084627  | -8.09776789  | 1.483595623 | 36.53104697 | 5.75E-06    |    | 1.22E-04    |
| ASV_its_7     | 188.6865479 | 0.243850294  | 0.820050405 | 47.62451729 | 4.22E-08    |    | 1.24E-06    |
| ASV_its_8     | 145.0406284 | -12.1683393  | 1.345462218 | 27.70062813 | 2.49E-04    |    | 0.003633212 |
| ASV_its_9     | 133.7241096 | -1.844123411 | 1.229445174 | 18.87341347 | 0.008593271 |    | 0.073254609 |
| ASV_its_10    | 156.7434403 | -2.03536481  | 0.615637871 | 65.93044469 | 9.77E-12    |    | 5.14E-10    |
| ASV_its_11    | 71.84983461 | 20.65150221  | 2.973939193 | 4.89190687  | 0.673152483 |    | 1           |
| ASV_its_12    | 45.94884922 | 0.084142789  | 1.161161243 | 73.23292924 | 3.27E-13    |    | 2.26E-11    |
| ASV_its_13    | 102.3098484 | -0.15979095  | 1.056310708 | 35.51987901 | 8.93E-06    |    | 1.85E-04    |
| ASV_its_14    | 87.06487229 | -5.236606482 | 0.989407861 | 23.26104962 | 0.001534995 |    | 0.017696298 |
| ASV_its_15    | 105.2016    | -11.44053869 | 1.383120035 | 38.67104062 | 2.26E-06    |    | 5.06E-05    |
| ASV_its_16    | 27.57805377 | -30          | 2.752550154 | 7.54453223  | 0.374462015 |    | 1           |
| ASV_its_17    | 89.82731719 | -20.71418573 | 3.551460504 | 5.305098963 | 0.622784479 |    | 1           |
| ASV_its_18    | 54.50713831 | 5.100810024  | 1.392336456 | 27.89896803 | 2.29E-04    |    | 0.003385809 |
| ASV_its_19    | 59.16065594 | 1.90476318   | 1.445074028 | 24.6519769  | 8.74E-04    |    | 0.010745517 |
| ASV_its_20    | 17.68374668 | -27.27983461 | 3.550739623 | 3.09548091  | 0.876031159 |    | 1           |
| ASV_its_21    | 39.84255846 | 7.377221104  | 1.620579793 | 31.13657024 | 5.87E-05    |    | 0.001021859 |
| ASV_its_22    | 78.60285472 | 0.572243558  | 0.871731557 | 99.13695629 | 1.63E-18    |    | 1.97E-16    |
| ASV_its_23    | 56.02087364 | -18.43793786 | 1.610213885 | 19.53430547 | 0.006668486 |    | 0.060016374 |
| ASV_its_24    | 75.30158354 | 12.72533032  | 1.866098338 | 8.064816044 | 0.326913224 |    | 1           |
| ASV_its_25    | 40.64476593 | 19.1158743   | 3.551437888 | 3.776497712 | NA          | NA |             |
| ASV_its_26    | 52.98313514 | 3.887245755  | 1.653208963 | 20.32289343 | 0.004912881 |    | 0.047960016 |
| ASV_its_27    | 23.92984836 | -5.663456164 | 3.546675031 | 5.600897663 | NA          | NA |             |
| ASV_its_28    | 33.84893436 | -3.372629444 | 1.296917438 | 19.3370183  | 0.007194634 |    | 0.063570108 |
| ASV_its_29    | 71.39049591 | -0.200840032 | 1.128412857 | 31.25017167 | 5.59E-05    |    | 9.81E-04    |
| ASV_its_30    | 48.78854351 | 3.279795458  | 1.512421862 | 38.36833968 | 2.58E-06    |    | 5.73E-05    |
| ASV_its_31    | 42.56431718 | -1.672448447 | 1.503691897 | 17.91912659 | 0.012340264 |    | 0.102314313 |
| ASV_its_32    | 25.678332   | 2.798464704  | 1.579425439 | 22.89816572 | 0.001775619 |    | 0.020182033 |
| ASV_its_33    | 21.58053935 | -4.969953482 | 3.544984227 | 4.485260472 | 0.722491428 |    | 1           |
| ASV_its_34    | 49.38258363 | 27.02217411  | 1.881787409 | 6.974366532 | 0.431553686 |    | 1           |
| ASV_its_35    | 33.66189337 | -29.72405447 | 1.361687129 | 29.56847931 | 1.14E-04    |    | 0.001802582 |
| ASV_its_36    | 42.31639567 | 11.53856944  | 1.9804915   | 13.28571898 | 0.06544543  |    | 0.390254648 |
| ASV_its_37    | 49.58792383 | 2.018182714  | 1.308233895 | 39.95005192 | 1.29E-06    |    | 3.05E-05    |
| ASV_its_38    | 22.16059414 | 7.096435227  | 1.984924401 | 15.21027503 | 0.033396489 |    | 0.231008289 |
| ASV_its_39    | 32.41050656 | -7.839158938 | 3.367044621 | 7.644102718 | 0.365019587 |    | 1           |
| ASV_its_40    | 10.17196975 | -0.965732941 | 1.747254026 | 15.99954733 | 0.025120497 |    | 0.186554364 |
| ASV_its_41    | 18.96717549 | -1.542867214 | 1.972812139 | 9.725760304 | NA          | NA |             |
| ASV_its_42    | 35.56290686 | 3.329194586  | 1.836053737 | 25.75506136 | 5.57E-04    |    | 0.00740955  |
| ASV_its_43    | 37.0616544  | -3.367698257 | 1.715105193 | 17.16524486 | 0.016361168 |    | 0.129445714 |
| ASV_its_44    | 31.08972406 | 9.976095609  | 1.566357794 | 26.06022395 | 4.91E-04    |    | 0.006797335 |
| ASV_its_45    | 35.31857496 | 4.17004698   | 1.749027142 | 17.12770614 | 0.01659101  |    | 0.129989756 |
| ASV_its_46    | 18.10072504 | -24.06705169 | 1.442382755 | 15.97664648 | 0.02533058  |    | 0.187440675 |
| ASV_its_47    | 51.9867588  | 19.26789586  | 3.551437806 | 3.927507853 | NA          | NA |             |
| ASV_its_48    | 24.44339156 | -10.38432709 | 3.552157344 | 3.461557607 | 0.83928033  |    | 1           |
| ASV_its_49    | 39.07149082 | -30          | 3.551138007 | 3.187734287 | NA          | NA |             |

|             |             |              |             |             |             |    |             |
|-------------|-------------|--------------|-------------|-------------|-------------|----|-------------|
| ASV_its_50  | 44.05200591 | -12.86319315 | 3.552157344 | 3.928822534 | NA          | NA |             |
| ASV_its_51  | 32.78996465 | -0.083565942 | 2.323195314 | 14.72187862 | NA          | NA |             |
| ASV_its_52  | 25.25134529 | 8.760877544  | 1.740753757 | 16.21049954 | 0.023261268 |    | 0.174351485 |
| ASV_its_53  | 25.08918527 | 1.945066259  | 1.182677869 | 28.41482365 | 1.85E-04    |    | 0.00274631  |
| ASV_its_54  | 6.154022352 | -29.99124354 | 3.550719207 | 3.124372825 | NA          | NA |             |
| ASV_its_55  | 33.85058629 | -22.342464   | 3.551442161 | 5.957752124 | 0.544691024 |    | 1           |
| ASV_its_56  | 9.122890896 | -10.02170548 | 2.236499057 | 8.357127683 | 0.302158208 |    | 1           |
| ASV_its_57  | 22.18004737 | -20.97127033 | 3.551460085 | 4.443214365 | 0.727543995 |    | 1           |
| ASV_its_58  | 22.584366   | 0.777576478  | 1.056995418 | 51.49431308 | 7.34E-09    |    | 2.54E-07    |
| ASV_its_59  | 17.25792781 | 6.893629752  | 3.550494446 | 2.793114873 | 0.903458562 |    | 1           |
| ASV_its_60  | 18.49571433 | 6.548320793  | 3.543562043 | 2.617594827 | 0.917984883 |    | 1           |
| ASV_its_61  | 22.64496613 | 10.77699898  | 2.14954087  | 10.39618132 | 0.167211618 |    | 0.742787756 |
| ASV_its_62  | 22.54963879 | 28.2041127   | 3.488656299 | 2.692952801 | 0.911880813 |    | 1           |
| ASV_its_63  | 10.26355589 | 8.868882227  | 3.549833528 | 3.623667531 | 0.821958475 |    | 1           |
| ASV_its_64  | 14.93288699 | -4.595885454 | 3.547512231 | 3.455589936 | NA          | NA |             |
| ASV_its_65  | 24.35731697 | 8.078291297  | 3.546927273 | 2.97862324  | NA          | NA |             |
| ASV_its_66  | 15.22864116 | -16.79620271 | 3.552157344 | 2.888461083 | 0.89512515  |    | 1           |
| ASV_its_67  | 16.82364694 | 2.794639954  | 3.383120243 | 4.99615682  | 0.660432257 |    | 1           |
| ASV_its_68  | 8.488055785 | 0.599418814  | 2.338741111 | 13.5706863  | 0.05936568  |    | 0.36664365  |
| ASV_its_69  | 16.761623   | -14.18490724 | 3.552157344 | 3.323168211 | 0.853585049 |    | 1           |
| ASV_its_70  | 19.31331987 | -26.22187779 | 3.551438223 | 3.484300923 | NA          | NA |             |
| ASV_its_71  | 20.5961488  | 19.00369936  | 3.550721741 | 3.018448913 | 0.883290324 |    | 1           |
| ASV_its_72  | 14.36513134 | -0.601137987 | 2.14090044  | 15.4192168  | 0.03098578  |    | 0.218071433 |
| ASV_its_73  | 12.33655254 | 3.428958212  | 1.253711702 | 30.2475145  | 8.55E-05    |    | 0.001417389 |
| ASV_its_74  | 19.17726548 | 2.537304818  | 1.533350353 | 24.2376378  | 0.001034772 |    | 0.012340802 |
| ASV_its_75  | 10.70732425 | -29.73844404 | 2.405411454 | 7.430853251 | 0.38543774  |    | 1           |
| ASV_its_76  | 4.921652879 | -30          | 3.550012289 | 2.237223053 | 0.945552834 |    | 1           |
| ASV_its_77  | 16.86068518 | -0.4186902   | 2.012977025 | 20.8461623  | 0.004004636 |    | 0.040229139 |
| ASV_its_78  | 12.27265951 | -25.86374524 | 3.551438111 | 3.175138911 | 0.868341511 |    | 1           |
| ASV_its_79  | 14.60496899 | -5.372893672 | 2.292273508 | 6.255680661 | 0.510232303 |    | 1           |
| ASV_its_80  | 8.017736995 | -29.61770326 | 1.781705195 | 12.9110246  | 0.074306164 |    | 0.425284217 |
| ASV_its_81  | 14.55947481 | -2.667857206 | 1.999780279 | 9.937485131 | 0.192143899 |    | 0.817540212 |
| ASV_its_82  | 27.75377235 | 18.87170523  | 3.55143806  | 3.542307161 | NA          | NA |             |
| ASV_its_83  | 8.45174722  | -4.803845397 | 2.228030669 | 7.718209667 | 0.358096478 |    | 1           |
| ASV_its_84  | 18.17325455 | -1.351944059 | 1.741289612 | 15.00651797 | 0.035915945 |    | 0.247024154 |
| ASV_its_85  | 8.749993763 | -29.77494213 | 1.405097301 | 14.11731326 | 0.049133732 |    | 0.310730118 |
| ASV_its_86  | 9.678537537 | -29.0959458  | 3.548319366 | 1.922820503 | NA          | NA |             |
| ASV_its_87  | 14.28117039 | 1.058216503  | 1.580775509 | 19.62542939 | 0.006438193 |    | 0.058327015 |
| ASV_its_88  | 13.53865387 | 3.756369871  | 1.834031972 | 14.71644779 | 0.039810856 |    | 0.263434898 |
| ASV_its_89  | 12.29673683 | 30           | 3.548447528 | 2.240967451 | 0.945308959 |    | 1           |
| ASV_its_90  | 14.83547784 | 6.725637269  | 3.550538736 | 2.699113748 | NA          | NA |             |
| ASV_its_91  | 11.654259   | -8.82940146  | 3.552157344 | 3.100089081 | 0.875591313 |    | 1           |
| ASV_its_92  | 13.28028043 | -6.362964383 | 3.23833298  | 4.81962986  | 0.681963726 |    | 1           |
| ASV_its_93  | 13.56773097 | 1.177235948  | 3.060994307 | 3.302543817 | 0.855675921 |    | 1           |
| ASV_its_94  | 9.810267175 | -3.910129313 | 1.558957753 | 21.20836915 | 0.003473689 |    | 0.035634747 |
| ASV_its_95  | 9.285039829 | -26.14334468 | 3.551439443 | 3.524222187 | 0.832653276 |    | 1           |
| ASV_its_96  | 9.00753707  | -20.15408184 | 2.32708506  | 2.50127496  | 0.927001029 |    | 1           |
| ASV_its_97  | 11.49745458 | -30          | 3.550553324 | 3.861782571 | 0.795552703 |    | 1           |
| ASV_its_98  | 12.44790149 | 19.24805076  | 1.945764441 | 6.951445938 | 0.433952767 |    | 1           |
| ASV_its_99  | 13.49909612 | 19.72019402  | 2.575858468 | 4.984971363 | 0.661797341 |    | 1           |
| ASV_its_100 | 11.83817172 | -5.840796107 | 1.854928378 | 18.34390586 | 0.010511061 |    | 0.088052868 |
| ASV_its_101 | 7.852579746 | 1.63400605   | 1.970912014 | 13.85972939 | 0.053733191 |    | 0.334416596 |
| ASV_its_102 | 8.1027702   | -0.137734528 | 2.437057895 | 5.9379076   | 0.547018046 |    | 1           |
| ASV_its_103 | 10.46247205 | 6.340066328  | 2.684948796 | 5.820415475 | 0.560868235 |    | 1           |
| ASV_its_104 | 10.70129633 | 25.29344436  | 3.550578505 | 2.540657808 | NA          | NA |             |
| ASV_its_105 | 11.76691863 | -30          | 3.550037475 | 4.707756297 | NA          | NA |             |
| ASV_its_106 | 18.07513043 | -11.39662063 | 3.552157344 | 3.382162461 | NA          | NA |             |
| ASV_its_107 | 11.75399518 | 20.29253765  | 3.551437557 | 2.609941756 | NA          | NA |             |
| ASV_its_108 | 9.721521071 | -2.187622174 | 2.318244605 | 11.56762771 | 0.11570452  |    | 0.574017711 |
| ASV_its_109 | 7.78462696  | 9.213925474  | 2.206547478 | 9.805373737 | 0.199873671 |    | 0.844492421 |
| ASV_its_110 | 10.98214779 | 0.633827129  | 2.693192364 | 8.452888555 | 0.294355797 |    | 1           |
| ASV_its_111 | 10.09349711 | 9.679867369  | 3.10741045  | 4.319566674 | 0.742321231 |    | 1           |
| ASV_its_112 | 7.6475649   | -25.72022496 | 3.549870399 | 2.253390081 | 0.944495833 |    | 1           |
| ASV_its_113 | 9.173277632 | -6.393541586 | 2.838689813 | 2.366607516 | 0.936802375 |    | 1           |
| ASV_its_114 | 10.78914921 | -11.88573658 | 3.552157344 | 3.065397129 | NA          | NA |             |
| ASV_its_115 | 9.037926161 | -14.52359691 | 3.552157344 | 2.943975135 | 0.890136147 |    | 1           |
| ASV_its_116 | 16.36191758 | 9.676517181  | 3.550143256 | 3.63308755  | 0.820934571 |    | 1           |



|             |             |              |             |              |             |             |
|-------------|-------------|--------------|-------------|--------------|-------------|-------------|
| ASV_its_117 | 9.771119945 | 3.692446615  | 2.111325526 | 4.25285091   | 0.750236793 | 1           |
| ASV_its_118 | 8.176706428 | 0.177146225  | 2.921095742 | 8.434629856  | 0.295831807 | 1           |
| ASV_its_119 | 9.149120731 | 0.168272207  | 1.794643057 | 8.915557726  | 0.258775672 | 0.999196018 |
| ASV_its_120 | 7.156205768 | -4.697481252 | 3.548139242 | 3.115447218  | NA          | NA          |
| ASV_its_121 | 7.440773551 | 0.139634316  | 1.97958503  | 25.53354596  | 6.10E-04    | 0.008026324 |
| ASV_its_122 | 6.106324545 | 1.830341804  | 2.258828902 | 6.922153017  | 0.437030082 | 1           |
| ASV_its_123 | 2.004223988 | -23.27745072 | 3.550749649 | 1.979505458  | 0.960965971 | 1           |
| ASV_its_124 | 9.486405414 | 3.863202356  | 2.667169649 | 3.985030075  | 0.781500033 | 1           |
| ASV_its_125 | 6.143229874 | -23.80559811 | 3.551440001 | 3.347169104  | 0.851138148 | 1           |
| ASV_its_126 | 4.16620022  | -8.845389728 | 3.548216813 | 2.363057763  | 0.937051261 | 1           |
| ASV_its_127 | 2.599651641 | 0.109712185  | 1.905157327 | 13.49087596  | 0.06101393  | 0.37396133  |
| ASV_its_128 | 7.02811646  | 0.723124065  | 2.817685188 | 10.02651171  | 0.187076044 | 0.803223968 |
| ASV_its_129 | 7.341307342 | -19.72564281 | 3.551523283 | 3.234573517  | 0.862487637 | 1           |
| ASV_its_130 | 8.040447511 | 8.326186912  | 3.550037798 | 3.622084919  | 0.822130317 | 1           |
| ASV_its_131 | 8.943911324 | -0.175334142 | 0.652935219 | 75.00288879  | 1.43E-13    | 1.05E-11    |
| ASV_its_132 | 5.186120813 | -24.26292325 | 3.55143914  | 2.652531386  | NA          | NA          |
| ASV_its_133 | 11.0708891  | 3.801049863  | 3.54945811  | 3.253800988  | NA          | NA          |
| ASV_its_134 | 7.664639077 | -9.545495271 | 2.610858797 | 4.372484631  | 0.736012839 | 1           |
| ASV_its_135 | 5.000036791 | 1.616396231  | 2.42808769  | 5.894779277  | 0.552087895 | 1           |
| ASV_its_136 | 5.855929403 | -19.36391628 | 3.455115521 | 1.61448818   | 0.978079418 | 1           |
| ASV_its_137 | 3.667061814 | -11.34569318 | 3.552157344 | 2.348868386  | 0.938041208 | 1           |
| ASV_its_138 | 9.961457704 | 9.893478958  | 3.54764831  | 1.669994043  | NA          | NA          |
| ASV_its_139 | 8.358927483 | 0.725218195  | 3.549492234 | 2.924007819  | NA          | NA          |
| ASV_its_140 | 6.622397866 | -0.631192914 | 2.543078359 | 9.436128851  | 0.222841067 | 0.914403767 |
| ASV_its_141 | 6.089008407 | 1.180996009  | 1.687516517 | 19.79158479  | 0.006037892 | 0.056006657 |
| ASV_its_142 | 6.628527899 | -11.24774107 | 3.552157344 | 2.64916824   | 0.915452144 | 1           |
| ASV_its_143 | 6.367332956 | -24.30743337 | 3.549882726 | 2.182308215  | NA          | NA          |
| ASV_its_144 | 7.070618383 | -0.50265068  | 2.566887876 | 8.860681444  | 0.262813971 | 1           |
| ASV_its_145 | 3.848520122 | -0.214393765 | 2.59665715  | 2.564150284  | NA          | NA          |
| ASV_its_146 | 4.649911789 | -24.28163094 | 3.551439331 | 2.585476769  | NA          | NA          |
| ASV_its_147 | 5.561327868 | -29.42361817 | 3.551441596 | 3.067458317  | 0.878692416 | 1           |
| ASV_its_148 | 5.445178481 | -25.04506488 | 3.551438859 | 2.675778978  | 0.913289734 | 1           |
| ASV_its_149 | 7.474820948 | 18.31552856  | 3.55143918  | 2.731192737  | 0.908706382 | 1           |
| ASV_its_150 | 7.734537233 | -30          | 3.550099691 | 2.947331857  | NA          | NA          |
| ASV_its_151 | 5.864574549 | 14.47479762  | 3.550791894 | 2.507461494  | 0.92653416  | 1           |
| ASV_its_152 | 9.873536887 | -29.92618788 | 3.550089772 | 2.600280131  | 0.919358509 | 1           |
| ASV_its_153 | 1.251162788 | -0.230611213 | 3.497260854 | 2.852193247  | 0.898330544 | NA          |
| ASV_its_154 | 5.660939015 | -12.44152904 | 3.552157344 | 2.656705214  | 0.914842249 | 1           |
| ASV_its_155 | 7.429296371 | -0.167954655 | 3.549320343 | 3.875454408  | NA          | NA          |
| ASV_its_156 | 5.880206203 | 6.688628786  | 3.54790012  | 2.742873408  | 0.90772656  | 1           |
| ASV_its_157 | 5.431823299 | 0.581450157  | 1.867160532 | 19.61799608  | 0.006456687 | 0.058327015 |
| ASV_its_158 | 5.721448569 | 0.253546701  | 2.452834943 | 7.696121481  | 0.360150597 | 1           |
| ASV_its_159 | 5.916282826 | -0.339983831 | 3.546629787 | 2.344880242  | 0.938318028 | 1           |
| ASV_its_160 | 9.763599288 | -16.18284221 | 3.552157344 | 3.004012132  | NA          | NA          |
| ASV_its_161 | 5.375272983 | 0.265936617  | 3.406613561 | 3.982874609  | 0.781747799 | 1           |
| ASV_its_162 | 7.656569505 | -2.266509675 | 2.659043423 | 6.004985882  | 0.539167294 | 1           |
| ASV_its_163 | 3.713043191 | -28.2415028  | 3.481443068 | 1.315871549  | 0.988009886 | 1           |
| ASV_its_164 | 3.828569157 | 6.484177025  | 3.549914156 | 2.33017673   | NA          | NA          |
| ASV_its_165 | 7.713928486 | 18.11454672  | 3.550746655 | 2.532918363  | 0.924597948 | 1           |
| ASV_its_166 | 6.622270384 | -5.038575397 | 2.573223795 | 3.303677024  | 0.855561324 | 1           |
| ASV_its_167 | 4.504727289 | -7.984302501 | 3.552157344 | 1.261538344  | NA          | NA          |
| ASV_its_168 | 7.747719461 | -23.50170001 | 3.549069929 | 1.902543788  | NA          | NA          |
| ASV_its_169 | 6.95960443  | 17.975341    | 3.551439593 | 1.434701507  | 0.984484603 | 1           |
| ASV_its_170 | 5.736031838 | 12.1368682   | 3.547664964 | 2.227564958  | NA          | NA          |
| ASV_its_171 | 4.598227936 | -1.339700207 | 3.147316353 | -0.018063029 | 1           | 1           |
| ASV_its_172 | 2.748522137 | -14.54391076 | 3.552157344 | 0.904432903  | NA          | NA          |
| ASV_its_173 | 4.15761308  | 0.104693278  | 3.405253573 | 5.441124327  | 0.606294565 | 1           |
| ASV_its_174 | 1.004768243 | -0.17045389  | 3.550532551 | 1.621911184  | 0.977786604 | NA          |
| ASV_its_175 | 5.831001667 | -1.566637393 | 2.578936361 | 5.679242302  | 0.577661033 | 1           |
| ASV_its_176 | 4.333333304 | 0.18065806   | 3.550264143 | 4.1299111    | 0.764698548 | 1           |
| ASV_its_177 | 4.45281409  | 23.63948801  | 3.55058424  | 0.798441417  | NA          | NA          |
| ASV_its_178 | 3.237802194 | 1.352442217  | 1.621769874 | 19.31799753  | 0.007247427 | 0.06380371  |
| ASV_its_179 | 5.278121357 | -3.332257458 | 2.473800593 | 4.22735068   | 0.753250324 | 1           |
| ASV_its_180 | 4.015795257 | 0.46359976   | 2.657337976 | 5.469187567  | 0.60290299  | 1           |
| ASV_its_181 | 7.25812815  | -6.209965979 | 3.548726018 | 1.690206115  | NA          | NA          |
| ASV_its_182 | 4.22527498  | 2.162435718  | 3.547352583 | 2.019976191  | 0.958726456 | 1           |
| ASV_its_183 | 2.477950176 | -23.23757548 | 3.549950527 | 0.466887634  | NA          | NA          |

|             |             |              |             |             |             |             |
|-------------|-------------|--------------|-------------|-------------|-------------|-------------|
| ASV_its_184 | 3.85477887  | -1.968673676 | 3.549448572 | 2.512768324 | 0.926132532 | 1           |
| ASV_its_185 | 4.045562278 | 20.73744877  | 3.517125802 | 2.636776837 | 0.916450433 | 1           |
| ASV_its_186 | 4.073344683 | 12.25597947  | 3.548053145 | 0.373289486 | 0.99979102  | 1           |
| ASV_its_187 | 3.214303963 | -23.86529951 | 3.551439799 | 1.058041123 | 0.993837137 | 1           |
| ASV_its_188 | 4.094643312 | -7.469339087 | 3.552157344 | 0.964414151 | 0.995382341 | 1           |
| ASV_its_189 | 3.766977091 | 0.330208343  | 3.550564314 | 2.196094562 | 0.948194415 | 1           |
| ASV_its_190 | 5.005315482 | 16.72247711  | 3.550777209 | 2.682538614 | 0.912736427 | 1           |
| ASV_its_191 | 2.773643476 | -22.7866819  | 3.550830154 | 1.109798865 | NA          | NA          |
| ASV_its_192 | 0.629473116 | -0.167820527 | 3.550557354 | 1.390148825 | 0.985871087 | NA          |
| ASV_its_193 | 4.251516656 | 19.04362371  | 2.452965457 | 4.689886578 | 0.697747421 | 1           |
| ASV_its_194 | 5.355638202 | -5.134292862 | 3.550717993 | 0.968563541 | NA          | NA          |
| ASV_its_195 | 4.807546244 | 29.42319045  | 2.810441157 | 0.370654751 | 0.999795929 | 1           |
| ASV_its_196 | 3.365570565 | 1.510900933  | 2.25336696  | 13.2153972  | 0.067030978 | 0.398727269 |
| ASV_its_197 | 4.015194137 | 16.25750436  | 2.820187006 | 2.760863097 | 0.906208286 | 1           |
| ASV_its_198 | 0.848226289 | -21.64400666 | 3.550658374 | 0.037053179 | NA          | NA          |
| ASV_its_199 | 3.859159508 | 5.151541766  | 2.215016996 | 8.193809732 | 0.315814737 | 1           |
| ASV_its_200 | 4.951990065 | 17.72752118  | 3.550832174 | 1.076882242 | NA          | NA          |
| ASV_its_201 | 4.965545467 | -0.730550346 | 3.54638179  | 2.634407075 | NA          | NA          |
| ASV_its_202 | 1.984464205 | -0.825547078 | 3.547379622 | 2.545842579 | NA          | NA          |
| ASV_its_203 | 4.374206524 | -4.511467028 | 3.549578308 | 1.939943779 | 0.963089367 | 1           |
| ASV_its_204 | 1.467177359 | 0.210379804  | 3.550133793 | 1.601146481 | 0.978599999 | NA          |
| ASV_its_205 | 3.45119267  | 10.46061765  | 3.548537749 | 1.886954444 | 0.965831242 | 1           |
| ASV_its_206 | 2.396387266 | 5.102747442  | 3.547878984 | 0.830765068 | 0.997117162 | 1           |
| ASV_its_207 | 6.436052341 | 18.3693293   | 3.550587036 | 1.065531154 | NA          | NA          |
| ASV_its_208 | 3.68848683  | 1.144243418  | 3.049636155 | 2.118301428 | 0.953003298 | 1           |
| ASV_its_209 | 3.156108858 | -1.416742644 | 3.549415712 | 2.042013688 | 0.957478418 | 1           |
| ASV_its_210 | 3.203284119 | -0.578494511 | 2.243513624 | 4.573761113 | 0.711817954 | 1           |
| ASV_its_211 | 2.594218839 | -0.07957828  | 3.55053535  | 2.239465618 | 0.945406842 | 1           |
| ASV_its_212 | 2.013930285 | -0.003809822 | 2.993482377 | 5.418058777 | 0.609085044 | 1           |
| ASV_its_213 | 2.984520322 | 0.352782992  | 3.550110416 | 1.70825762  | 0.974213061 | 1           |
| ASV_its_214 | 0.87763789  | -0.675298783 | 3.549275323 | 1.156954317 | 0.99188448  | NA          |
| ASV_its_215 | 3.752108656 | -10.56892873 | 3.548062315 | 1.799629639 | 0.970093853 | 1           |
| ASV_its_216 | 3.708759761 | 3.94085451   | 2.684101302 | 1.604484803 | 0.978470428 | 1           |
| ASV_its_217 | 1.093284613 | 0.256434851  | 3.550192595 | 1.28281923  | 0.98889336  | NA          |
| ASV_its_218 | 3.652735416 | 11.538682    | 3.278434896 | 3.704551168 | 0.813108721 | 1           |
| ASV_its_219 | 3.463851467 | 17.6237357   | 3.550817187 | 0.844442204 | NA          | NA          |
| ASV_its_220 | 4.843406315 | 17.73456003  | 3.551440467 | 1.211996331 | 0.990648057 | 1           |
| ASV_its_221 | 3.197849137 | 1.830538635  | 3.54697524  | 4.573343978 | NA          | NA          |
| ASV_its_222 | 2.273494346 | -5.897080409 | 3.114088825 | 2.439349178 | 0.93159447  | 1           |
| ASV_its_223 | 2.758267826 | -0.095566535 | 3.550548515 | 2.357620462 | 0.937431536 | 1           |
| ASV_its_224 | 3.168610107 | 1.248189725  | 2.645404189 | 4.850028172 | 0.678259056 | 1           |
| ASV_its_225 | 4.393999421 | 2.541678165  | 3.546434506 | 1.613499369 | NA          | NA          |
| ASV_its_226 | 2.740187064 | 0.321441483  | 3.529225499 | 2.584925603 | 0.920567486 | 1           |
| ASV_its_227 | 1.045428367 | 17.92236737  | 3.551444008 | 0.230089804 | 0.999959391 | NA          |
| ASV_its_228 | 2.645856325 | 0.310922544  | 3.550612565 | 2.231122864 | 0.945948939 | 1           |
| ASV_its_229 | 2.571549933 | 0.665854739  | 2.938566683 | 6.640936958 | 0.467197187 | 1           |
| ASV_its_230 | 3.247509914 | 2.775495888  | 3.157864814 | 2.920801827 | 0.892230737 | 1           |
| ASV_its_231 | 2.808611457 | 1.143911148  | 3.494793677 | 1.63894826  | 0.97710595  | 1           |
| ASV_its_232 | 2.176001754 | -0.132722812 | 2.757588939 | 7.215428778 | 0.406799618 | 1           |
| ASV_its_233 | 2.270065851 | -7.889792064 | 3.552157344 | 0.598359936 | 0.999000731 | 1           |
| ASV_its_234 | 1.65010227  | 0.403711446  | 3.549289731 | 1.358933008 | NA          | NA          |
| ASV_its_235 | 2.862387495 | 1.452687151  | 3.540438811 | 1.437277125 | 0.984402045 | 1           |
| ASV_its_236 | 3.062140239 | -0.5088662   | 3.548034116 | 3.325000306 | 0.853398784 | 1           |
| ASV_its_237 | 3.261993826 | -12.52301099 | 3.547064601 | 0.71395168  | NA          | NA          |
| ASV_its_238 | 2.730982649 | 1.710813133  | 3.548283963 | 1.511392497 | 0.981912629 | 1           |
| ASV_its_239 | 4.717440194 | 17.71603432  | 3.551440543 | 1.195787312 | NA          | NA          |
| ASV_its_240 | 2.704712579 | -0.09050074  | 3.549381492 | 1.864392986 | NA          | NA          |
| ASV_its_241 | 2.676477055 | 1.019355119  | 2.989941474 | 4.918789888 | 0.669873137 | 1           |
| ASV_its_242 | 2.454624883 | 17.64793541  | 3.551442069 | 0.784597753 | 0.997597979 | 1           |
| ASV_its_243 | 2.295918935 | 0.310922539  | 3.550616347 | 2.158751293 | 0.950533597 | 1           |
| ASV_its_244 | 1.778096203 | -0.079539449 | 3.550545054 | 2.046795484 | 0.95720496  | NA          |
| ASV_its_245 | 3.587800495 | 17.52867189  | 3.551441464 | 1.027679198 | 0.994369589 | 1           |
| ASV_its_246 | 2.076914006 | 17.55993421  | 3.55037661  | 0.436341611 | 0.999647809 | 1           |
| ASV_its_247 | 2.094309712 | 6.95197518   | 3.5496823   | 2.095444674 | 0.954369223 | 1           |
| ASV_its_248 | 1.986160699 | -1.367613071 | 3.190959607 | 3.05524163  | 0.879845313 | NA          |
| ASV_its_249 | 1.881231479 | 0.763334684  | 2.497351908 | 7.215403244 | 0.406802193 | NA          |
| ASV_its_250 | 1.722896621 | -0.079532826 | 3.550546043 | 2.030709345 | 0.958121122 | NA          |

|             |             |              |             |              |             |    |   |
|-------------|-------------|--------------|-------------|--------------|-------------|----|---|
| ASV_its_251 | 1.667426182 | 0.276700284  | 3.550247902 | 0.475164343  | 0.999532434 | NA |   |
| ASV_its_252 | 1.243593622 | -13.83527229 | 3.552157344 | 0.417744659  | NA          | NA |   |
| ASV_its_253 | 3.245162546 | 17.48801068  | 3.550871173 | 0.832448987  | 0.997098526 |    | 1 |
| ASV_its_254 | 3.818858916 | 21.99040136  | 3.551444398 | 0.830863397  | NA          | NA |   |
| ASV_its_255 | 4.373281517 | 1.254588845  | 3.549034187 | 1.632509483  | NA          | NA |   |
| ASV_its_256 | 1.657552957 | -23.14639513 | 3.551441947 | 0.651252325  | 0.9986829   | NA |   |
| ASV_its_257 | 1.478632001 | 0.393268883  | 3.192898673 | 5.009782688  | 0.658769337 | NA |   |
| ASV_its_258 | 2.142601902 | 18.93568921  | 3.551421469 | 1.91567506   | 0.964359669 |    | 1 |
| ASV_its_259 | 0.502406771 | -26.5756089  | 3.551446579 | -0.201798925 | NA          | NA |   |
| ASV_its_260 | 1.927772839 | 0.837430028  | 2.069035887 | 12.1438561   | 0.095926229 | NA |   |
| ASV_its_261 | 1.439139205 | -22.79532357 | 3.551443376 | 0.571202735  | NA          | NA |   |
| ASV_its_262 | 1.150474293 | -11.93979146 | 3.552157344 | 0.369983104  | NA          | NA |   |
| ASV_its_263 | 1.992458979 | 1.411115766  | 2.75503173  | 3.747924741  | 0.808310579 | NA |   |
| ASV_its_264 | 1.837491881 | -3.441921771 | 3.54870842  | 2.030399865  | NA          | NA |   |
| ASV_its_265 | 2.167467038 | 1.08330615   | 3.445353592 | 3.068095616  | 0.878632151 |    | 1 |
| ASV_its_266 | 1.620352554 | -23.49535212 | 3.551442071 | 0.637280889  | 0.99877261  | NA |   |
| ASV_its_267 | 1.228227209 | 0.099571427  | 3.549293106 | 1.310025103  | NA          | NA |   |
| ASV_its_268 | 1.233874231 | -22.69593043 | 3.551444354 | 0.476727434  | NA          | NA |   |
| ASV_its_269 | 2.081345594 | 3.736405521  | 3.550472436 | 0.537443135  | NA          | NA |   |
| ASV_its_270 | 1.469206876 | -21.0691099  | 3.551474823 | 1.716901449  | 0.973838286 | NA |   |
| ASV_its_271 | 1.512771312 | -23.24346997 | 3.551443088 | 0.601782326  | NA          | NA |   |
| ASV_its_272 | 1.790266073 | 0.150849491  | 3.545782922 | 1.935360831  | NA          | NA |   |
| ASV_its_273 | 1.475563518 | -0.433320073 | 3.54845264  | 0.707991968  | 0.998273574 | NA |   |
| ASV_its_274 | 1.817012422 | 0.68878172   | 3.55059098  | 1.971869204  | 0.961380906 | NA |   |
| ASV_its_275 | 2.557529634 | -0.673892501 | 3.548976768 | 2.227617449  | NA          | NA |   |
| ASV_its_276 | 2.951156928 | -9.10319949  | 3.550628103 | 0.822268698  | NA          | NA |   |
| ASV_its_277 | 2.294534433 | 0.342901272  | 3.549212961 | 3.530534831  | NA          | NA |   |
| ASV_its_278 | 1.094655245 | 0.858898445  | 3.549359049 | 2.393338736  | 0.934912377 | NA |   |
| ASV_its_279 | 0.668419982 | -0.002674189 | 2.850513095 | 2.903534744  | 0.893780298 | NA |   |
| ASV_its_280 | 1.520501272 | 0.31092356   | 3.550630928 | 1.948554135  | 0.962632772 | NA |   |
| ASV_its_281 | 1.325446113 | -0.184513943 | 3.550288168 | 3.921748391  | 0.788745108 | NA |   |
| ASV_its_282 | 2.973687339 | 16.97051891  | 3.550907544 | 0.784456403  | NA          | NA |   |
| ASV_its_283 | 2.021949441 | 17.53332195  | 3.550819197 | 0.510476457  | 0.999407209 |    | 1 |
| ASV_its_284 | 0.892143251 | -12.40503414 | 3.552157344 | 0.213984027  | NA          | NA |   |
| ASV_its_285 | 2.182200029 | 17.19033838  | 3.551443917 | 0.722311481  | NA          | NA |   |
| ASV_its_286 | 2.182217416 | -1.381318568 | 3.333996899 | 1.881913249  | NA          | NA |   |
| ASV_its_287 | 3.092042471 | 0.973965758  | 3.549079848 | 1.546856291  | NA          | NA |   |
| ASV_its_288 | 1.200676564 | -0.067134798 | 3.55056195  | 2.248861328  | 0.94479298  | NA |   |
| ASV_its_289 | 1.465077671 | -22.87322324 | 3.551443278 | 0.582067278  | NA          | NA |   |
| ASV_its_290 | 1.290171329 | -22.7423341  | 3.551444044 | 0.50404344   | NA          | NA |   |
| ASV_its_291 | 1.527809621 | 0.298851045  | 3.549529233 | 2.575524822  | 0.921303418 | NA |   |
| ASV_its_292 | 2.154596988 | -0.50710533  | 3.549207926 | 1.624213495  | 0.977695324 |    | 1 |
| ASV_its_293 | 1.997267823 | 17.1285984   | 3.551444491 | 0.667923825  | NA          | NA |   |
| ASV_its_294 | 1.091035607 | -23.85958627 | 3.550767594 | 0.196073671  | 0.999976495 | NA |   |
| ASV_its_295 | 1.499121802 | 1.050357694  | 3.549303434 | 2.538909988  | 0.924138715 | NA |   |
| ASV_its_296 | 1.600561813 | -0.691517447 | 3.548935469 | 1.769600257  | 0.971486057 | NA |   |
| ASV_its_297 | 1.195316294 | 0.071527446  | 3.550571664 | 3.171961035  | 0.868651746 | NA |   |
| ASV_its_298 | 1.257302149 | 1.088450561  | 3.549269231 | 2.478704866  | 0.928692055 | NA |   |
| ASV_its_299 | 0.975028253 | -22.51352972 | 3.55093177  | 0.215751788  | NA          | NA |   |
| ASV_its_300 | 0.544057913 | 0.088657797  | 3.549616993 | 1.555260282  | 0.980334651 | NA |   |
| ASV_its_301 | 1.421100317 | 0.258532732  | 3.549433585 | 1.322751971  | 0.987820731 | NA |   |
| ASV_its_302 | 1.261727438 | 0.310924201  | 3.55063978  | 1.853428925  | 0.967505423 | NA |   |
| ASV_its_303 | 1.808361888 | 1.035410608  | 3.549206251 | 1.231499969  | NA          | NA |   |
| ASV_its_304 | 1.100582097 | -0.079472065 | 3.550564036 | 1.802179798  | 0.969973889 | NA |   |
| ASV_its_305 | 1.236399058 | -13.51345751 | 3.552157344 | 0.454940421  | NA          | NA |   |
| ASV_its_306 | 1.722729423 | -2.438339635 | 3.543859195 | 0.945248798  | NA          | NA |   |
| ASV_its_307 | 0.622073919 | -0.551580013 | 3.549395897 | 1.281740255  | 0.988921502 | NA |   |
| ASV_its_308 | 0.880997996 | -1.225644185 | 3.548377538 | 0.835807963  | 0.997061117 | NA |   |
| ASV_its_309 | 1.587185664 | 1.120036604  | 3.549359709 | 1.795081906  | 0.970307112 | NA |   |
| ASV_its_310 | 2.069866849 | -23.35205447 | 3.551444135 | 0.81792377   | 0.997256704 |    | 1 |
| ASV_its_311 | 1.155337059 | 0.598707977  | 3.549304375 | 2.776994895  | 0.904837357 | NA |   |
| ASV_its_312 | 1.266360953 | 2.824200322  | 3.54759428  | 0.67795766   | 0.998499426 | NA |   |
| ASV_its_313 | 1.496059829 | 16.9280693   | 3.551446775 | 0.490548522  | NA          | NA |   |
| ASV_its_314 | 0.907978916 | 0.448525389  | 3.550603894 | 2.904518728  | 0.893692253 | NA |   |
| ASV_its_315 | 2.055485465 | 0.643956978  | 3.550177867 | 3.17065863   | 0.868778809 |    | 1 |
| ASV_its_316 | 1.81631342  | -0.049242738 | 3.548013838 | 3.840131159  | 0.797996137 | NA |   |
| ASV_its_317 | 1.033652825 | -0.95149601  | 3.549780373 | 1.158191171  | NA          | NA |   |

|             |             |              |             |             |             |    |
|-------------|-------------|--------------|-------------|-------------|-------------|----|
| ASV_its_318 | 1.22687648  | 1.592011016  | 3.215518668 | 0.960392702 | 0.995442405 | NA |
| ASV_its_319 | 2.476049094 | 1.254116909  | 3.549163514 | 1.44872116  | NA          | NA |
| ASV_its_320 | 1.614081098 | 0.482202814  | 3.550021826 | 0.710905219 | NA          | NA |
| ASV_its_321 | 1.619849443 | -0.507103077 | 3.549209428 | 1.472415096 | 0.983249311 | NA |
| ASV_its_322 | 1.14633378  | 0.310924582  | 3.550645016 | 1.804514473 | 0.969863823 | NA |
| ASV_its_323 | 1.329277487 | 16.84882621  | 3.551447926 | 0.417988242 | 0.999694837 | NA |
| ASV_its_324 | 1.408851349 | -22.37274607 | 3.55144352  | 0.557949988 | 0.999205415 | NA |
| ASV_its_325 | 1.942815414 | 0.782285678  | 3.548378593 | 3.844419073 | 0.79751286  | NA |
| ASV_its_326 | 1.418631734 | 0.63451964   | 3.550659    | 3.05213325  | NA          | NA |
| ASV_its_327 | 0.376594328 | 0.008916444  | 3.549881827 | 1.531177442 | 0.981210626 | NA |
| ASV_its_328 | 1.22549664  | 0.053319952  | 3.548223153 | 1.830302356 | NA          | NA |
| ASV_its_329 | 0.918278146 | -0.477791187 | 3.550110866 | 1.457439503 | 0.983746635 | NA |
| ASV_its_330 | 1.273800532 | 0.315939405  | 3.550643674 | 1.881074797 | NA          | NA |
| ASV_its_331 | 2.436435984 | 1.254099514  | 3.549168371 | 1.443485499 | NA          | NA |
| ASV_its_332 | 0.613214986 | 0.615597693  | 3.549730495 | 1.858725341 | NA          | NA |
| ASV_its_333 | 1.85294585  | 0.315939401  | 3.550626027 | 2.072059341 | NA          | NA |
| ASV_its_334 | 1.937179763 | 0.735429182  | 3.55063108  | 2.069873201 | NA          | NA |
| ASV_its_335 | 0.893301157 | 0.070436567  | 3.550586301 | 2.827794503 | 0.900462514 | NA |
| ASV_its_336 | 1.447878907 | 0.395169038  | 3.550050835 | 0.707694929 | NA          | NA |
| ASV_its_337 | 1.02606485  | -0.074499784 | 3.550572282 | 1.790612449 | NA          | NA |
| ASV_its_338 | 0.862573616 | -0.079425873 | 3.550577777 | 1.677977816 | 0.975501415 | NA |
| ASV_its_339 | 1.27501263  | -0.118440267 | 3.549300618 | 2.922771835 | NA          | NA |
| ASV_its_340 | 0.972257628 | 1.129074656  | 3.549993104 | 1.328867526 | 0.987651078 | NA |
| ASV_its_341 | 1.619581153 | 0.747927666  | 3.549322559 | 2.662353118 | NA          | NA |
| ASV_its_342 | 1.75352138  | -0.506591648 | 3.549327332 | 1.589262536 | NA          | NA |
| ASV_its_343 | 0.730754622 | -0.074411887 | 3.55059606  | 1.617812996 | NA          | NA |
| ASV_its_344 | 0.844691775 | 0.304327304  | 3.549935041 | 2.11840674  | 0.952996955 | NA |
| ASV_its_345 | 1.535749295 | -0.064337648 | 3.549305808 | 3.16475265  | NA          | NA |
| ASV_its_346 | 0.70297879  | -0.074400838 | 3.550599323 | 1.598084984 | NA          | NA |
| ASV_its_347 | 1.186401136 | -0.074528181 | 3.550564328 | 1.864545464 | NA          | NA |
| ASV_its_348 | 0.778640773 | -0.079399583 | 3.550584624 | 1.625840087 | 0.977630702 | NA |
| ASV_its_349 | 1.293766472 | 0.842387164  | 3.550065088 | 2.19107853  | NA          | NA |
| ASV_its_350 | 0.963592003 | 0.62871269   | 3.549821399 | 3.883012236 | 0.79314928  | NA |
| ASV_its_351 | 1.105256118 | 0.219315089  | 3.550603794 | 1.906368529 | NA          | NA |
| ASV_its_352 | 0.726533037 | 0.419207368  | 3.549607937 | 1.02461892  | NA          | NA |
| ASV_its_353 | 1.702243001 | 0.879391413  | 3.550606586 | 1.900374629 | NA          | NA |
| ASV_its_354 | 0.800772183 | -0.321073957 | 3.549323199 | 2.27010056  | NA          | NA |
| ASV_its_355 | 0.60335015  | -0.318983393 | 3.548162649 | 1.511215866 | NA          | NA |
| ASV_its_356 | 0.925905033 | 0.310583489  | 3.54889252  | 0.630361255 | NA          | NA |
| ASV_its_357 | 0.821756908 | -0.50649465  | 3.549090974 | 1.395347249 | NA          | NA |
| ASV_its_358 | 0.875288042 | 0.310925657  | 3.550662736 | 1.6670203   | 0.975958258 | NA |
| ASV_its_359 | 1.13925895  | 0.735289498  | 3.550670115 | 1.799303152 | NA          | NA |
| ASV_its_360 | 0.658327697 | 0.439555938  | 3.550542986 | 0.849795255 | NA          | NA |
| ASV_its_361 | 0.986350229 | -0.067755666 | 3.549480757 | 2.630150173 | 0.91698203  | NA |
| ASV_its_362 | 0.33391711  | -0.576484589 | 3.549743439 | 1.163848048 | 0.991735607 | NA |
| ASV_its_363 | 0.763278535 | 0.026452932  | 3.550592976 | 2.480434443 | 0.92856315  | NA |
| ASV_its_364 | 1.853859332 | -0.029870993 | 3.550563006 | 2.127021556 | NA          | NA |
| ASV_its_365 | 0.893340044 | -0.07446665  | 3.55058103  | 1.719999468 | NA          | NA |
| ASV_its_366 | 1.015518397 | 0.315939376  | 3.550658034 | 1.76551974  | NA          | NA |
| ASV_its_367 | 0.899083044 | 0.408497521  | 3.550654618 | 2.936387831 | 0.890823832 | NA |
| ASV_its_368 | 0.541098415 | 0.596335885  | 3.550600697 | 1.211511097 | NA          | NA |
| ASV_its_369 | 1.126411853 | 1.441096344  | 3.549700934 | 1.186881374 | 0.991225821 | NA |
| ASV_its_370 | 1.583615047 | -0.029846644 | 3.550570512 | 2.046679563 | NA          | NA |
| ASV_its_371 | 0.216023321 | -0.170058583 | 3.550629499 | 0.842640411 | 0.996984052 | NA |
| ASV_its_372 | 0.714951762 | -0.531359527 | 3.550054148 | 1.293930731 | 0.988600991 | NA |
| ASV_its_373 | 0.737157202 | 0.074315135  | 3.550598947 | 2.625432858 | 0.917359492 | NA |
| ASV_its_374 | 0.710153615 | 0.013855445  | 3.550603441 | 2.697028597 | 0.911544909 | NA |
| ASV_its_375 | 0.567782835 | -0.573351072 | 3.549722967 | 1.555491619 | 0.980326122 | NA |
| ASV_its_376 | 0.890430596 | 0.787836004  | 3.549174849 | 2.614959598 | NA          | NA |
| ASV_its_377 | 0.956817911 | 0.315939394  | 3.550662378 | 1.735161633 | NA          | NA |
| ASV_its_378 | 0.715086574 | 0.48814541   | 3.550168265 | 2.370679777 | NA          | NA |
| ASV_its_379 | 0.638511904 | 0.540386922  | 3.549720312 | 1.438932628 | 0.984348841 | NA |
| ASV_its_380 | 1.180972007 | -0.029791397 | 3.55058806  | 1.897136801 | NA          | NA |
| ASV_its_381 | 0.806765257 | 0.31092607   | 3.550669103 | 1.625434769 | 0.977646815 | NA |
| ASV_its_382 | 0.992172567 | 0.360443971  | 3.550696223 | 1.792601131 | 0.970423081 | NA |
| ASV_its_383 | 0.772008953 | 0.310926223  | 3.550672761 | 1.603018163 | 0.97852741  | NA |
| ASV_its_384 | 0.453956554 | 0.561248263  | 3.550608607 | 1.3706638   | NA          | NA |

|             |             |              |             |             |             |    |
|-------------|-------------|--------------|-------------|-------------|-------------|----|
| ASV_its_385 | 0.826411043 | 0.367511568  | 3.550662484 | 2.545972516 | 0.923595687 | NA |
| ASV_its_386 | 0.566707666 | -0.074326394 | 3.550619967 | 1.488349273 | NA          | NA |
| ASV_its_387 | 0.605236166 | -0.079335572 | 3.550604778 | 1.497542402 | NA          | NA |
| ASV_its_388 | 0.561295358 | -0.079308822 | 3.550611857 | 1.459215563 | 0.983688123 | NA |
| ASV_its_389 | 0.877878176 | -0.029716853 | 3.550611873 | 1.746048938 | NA          | NA |
| ASV_its_390 | 0.713472023 | 0.509567537  | 3.550999259 | 0.621998541 | 0.998865944 | NA |
| ASV_its_391 | 1.336259027 | 0.315939406  | 3.550641044 | 1.905249499 | NA          | NA |
| ASV_its_392 | 0.559250986 | -0.074320049 | 3.550621387 | 1.481606595 | NA          | NA |
| ASV_its_393 | 0.773662789 | 0.807355942  | 3.549703009 | 2.464167142 | 0.929771058 | NA |
| ASV_its_394 | 0.511087583 | -0.222491858 | 3.5495927   | 1.616640486 | NA          | NA |
| ASV_its_395 | 1.391622362 | -0.043552368 | 3.550496801 | 2.102770051 | 0.953933791 | NA |
| ASV_its_396 | 0.694618778 | 0.079739518  | 3.550616605 | 2.879936318 | 0.895882451 | NA |
| ASV_its_397 | 0.745300836 | -0.074418734 | 3.550594459 | 1.627659906 | NA          | NA |
| ASV_its_398 | 0.740811594 | 0.3159394    | 3.550684277 | 1.604840874 | NA          | NA |
| ASV_its_399 | 0.500862643 | 0.403406597  | 3.550158482 | 0.974119915 | NA          | NA |
| ASV_its_400 | 1.129513984 | 1.132640127  | 3.549930134 | 1.393256664 | 0.985776911 | NA |
| ASV_its_401 | 0.601106002 | 0.117813275  | 3.550643264 | 2.756357936 | NA          | NA |
| ASV_its_402 | 0.651000297 | -0.07935754  | 3.550598421 | 1.53457786  | NA          | NA |
| ASV_its_403 | 0.718280792 | 0.696734055  | 3.549177168 | 1.835187378 | 0.968396629 | NA |
| ASV_its_404 | 1.319528244 | 0.735336063  | 3.550657185 | 1.873962477 | NA          | NA |
| ASV_its_405 | 0.964294529 | -1.165577251 | 3.549139202 | 0.958916256 | NA          | NA |
| ASV_its_406 | 1.186557076 | -0.029791356 | 3.550587743 | 1.899391441 | 0.965198229 | NA |
| ASV_its_407 | 0.329071362 | 0.223347462  | 3.550882261 | 0.397439108 | NA          | NA |
| ASV_its_408 | 0.858904989 | -0.07445615  | 3.550583748 | 1.699832251 | NA          | NA |
| ASV_its_409 | 0.658230679 | 0.310927319  | 3.550687441 | 1.521808463 | 0.981545033 | NA |
| ASV_its_410 | 0.50782072  | -0.003328298 | 3.548762594 | 2.129820503 | NA          | NA |
| ASV_its_411 | 0.531526553 | -0.079291833 | 3.550617322 | 1.431450164 | 0.984588443 | NA |
| ASV_its_412 | 0.648809992 | 0.489521543  | 3.550687605 | 2.377935594 | 0.936004833 | NA |
| ASV_its_413 | 1.112218243 | -0.169108959 | 3.549540136 | 2.116918212 | NA          | NA |
| ASV_its_414 | 0.731515844 | 1.512923641  | 3.549654506 | 0.916908358 | 0.996059922 | NA |
| ASV_its_415 | 1.063455887 | 0.315939385  | 3.550654852 | 1.788840642 | NA          | NA |
| ASV_its_416 | 0.466987456 | 0.320479215  | 3.550632256 | 2.03856559  | 0.957675019 | NA |
| ASV_its_417 | 0.745765637 | 1.040467238  | 3.549448077 | 1.025576438 | 0.994405334 | NA |
| ASV_its_418 | 0.596370902 | -0.079331651 | 3.550606129 | 1.489938306 | NA          | NA |
| ASV_its_419 | 0.465836007 | 0.596312361  | 3.550608916 | 1.135222358 | 0.992342728 | NA |
| ASV_its_420 | 0.760827752 | -0.029673358 | 3.550626147 | 1.673098096 | NA          | NA |
| ASV_its_421 | 0.617173072 | 0.31092765   | 3.550694065 | 1.489002163 | 0.982687963 | NA |
| ASV_its_422 | 0.782484567 | 0.801142091  | 3.549773001 | 1.914988638 | 0.964395241 | NA |
| ASV_its_423 | 0.656225873 | 0.310927377  | 3.550687749 | 1.520198327 | NA          | NA |
| ASV_its_424 | 0.706453918 | 0.791216305  | 3.550265292 | 2.401152028 | 0.934354705 | NA |
| ASV_its_425 | 0.356369422 | 0.597074498  | 3.550652454 | 0.998294185 | 0.994856007 | NA |
| ASV_its_426 | 0.510349619 | -0.079276273 | 3.5506216   | 1.41071356  | 0.985240856 | NA |
| ASV_its_427 | 0.92683879  | -0.029732665 | 3.550606984 | 1.773535924 | NA          | NA |
| ASV_its_428 | 0.590640618 | 0.168159895  | 3.550650612 | 2.641604161 | 0.916062185 | NA |
| ASV_its_429 | 0.625146649 | 1.586311231  | 3.548728577 | 0.65945216  | NA          | NA |
| ASV_its_430 | 0.763695695 | 0.408501933  | 3.551086087 | 0.576614662 | NA          | NA |
| ASV_its_431 | 1.285061582 | -0.029808789 | 3.550582481 | 1.93997776  | NA          | NA |
| ASV_its_432 | 0.911889777 | -0.029727144 | 3.550608425 | 1.76524235  | NA          | NA |
| ASV_its_433 | 0.719256869 | -0.361922246 | 3.550530033 | 2.101639975 | NA          | NA |
| ASV_its_434 | 0.246343495 | -0.171674753 | 3.550044098 | 1.230625101 | 0.990204582 | NA |
| ASV_its_435 | 0.953171572 | 0.315939365  | 3.550662678 | 1.732994309 | NA          | NA |
| ASV_its_436 | 0.691555706 | 1.255170405  | 3.549670105 | 0.991428185 | 0.994965629 | NA |
| ASV_its_437 | 0.704405824 | 0.315939358  | 3.550689298 | 1.579045543 | NA          | NA |
| ASV_its_438 | 0.712698317 | 0.423134566  | 3.549894858 | 0.748805701 | NA          | NA |
| ASV_its_439 | 0.527893398 | -0.253881932 | 3.548541144 | 1.183044395 | 0.991312071 | NA |
| ASV_its_440 | 0.549381731 | 0.156563025  | 3.549805861 | 1.239256166 | 0.989994768 | NA |
| ASV_its_441 | 0.599174692 | 0.693756521  | 3.550676193 | 1.431247716 | 0.984594895 | NA |
| ASV_its_442 | 0.598805698 | 1.248231088  | 3.549433671 | 0.722136159 | 0.998159811 | NA |
| ASV_its_443 | 0.686795679 | 0.315939391  | 3.550691914 | 1.566142687 | NA          | NA |
| ASV_its_444 | 0.826761111 | 0.419243728  | 3.549523757 | 1.065998645 | NA          | NA |
| ASV_its_445 | 1.076210979 | 0.735270726  | 3.550675687 | 1.769973977 | NA          | NA |
| ASV_its_446 | 0.710604847 | -0.074402759 | 3.550598425 | 1.60320987  | NA          | NA |
| ASV_its_447 | 0.516468575 | 0.360414874  | 3.550790735 | 1.460207516 | NA          | NA |
| ASV_its_448 | 0.881352286 | -0.567515766 | 3.549141766 | 1.150202169 | NA          | NA |
| ASV_its_449 | 0.5456841   | 0.385165194  | 3.550698976 | 2.250886093 | 0.94466023  | NA |
| ASV_its_450 | 0.584696325 | -0.208101786 | 3.549064957 | 1.819771766 | 0.969138927 | NA |
| ASV_its_451 | 0.517196329 | 0.163559254  | 3.550688776 | 2.398473285 | NA          | NA |

|             |             |              |             |             |             |    |
|-------------|-------------|--------------|-------------|-------------|-------------|----|
| ASV_its_452 | 0.215345132 | 0.220033892  | 3.550711003 | 0.814405151 | 0.99729415  | NA |
| ASV_its_453 | 0.448005196 | 0.036916726  | 3.5494806   | 1.80528351  | NA          | NA |
| ASV_its_454 | 0.593150497 | 1.293901055  | 3.549550002 | 0.810287922 | NA          | NA |
| ASV_its_455 | 0.605930887 | 0.688543271  | 3.550664159 | 1.412130235 | 0.985196827 | NA |
| ASV_its_456 | 0.535110061 | 0.493720914  | 3.550696548 | 2.49117643  | 0.927760022 | NA |
| ASV_its_457 | 1.001344129 | 0.735244254  | 3.550683187 | 1.733190961 | NA          | NA |
| ASV_its_458 | 0.509884123 | 0.310929147  | 3.55071641  | 1.391738971 | 0.985822949 | NA |
| ASV_its_459 | 0.714907089 | 0.337499226  | 3.549512887 | 2.285501761 | NA          | NA |
| ASV_its_460 | 0.283683317 | 0.865054769  | 3.550131579 | 0.697181663 | NA          | NA |
| ASV_its_461 | 0.505873518 | 0.810234557  | 3.550598707 | 2.144065681 | 0.951437965 | NA |
| ASV_its_462 | 0.520689625 | -0.07429185  | 3.550629399 | 1.444966366 | NA          | NA |
| ASV_its_463 | 0.523142653 | 1.035665591  | 3.550151316 | 1.51782286  | 0.981686211 | NA |
| ASV_its_464 | 0.583037026 | 0.011775188  | 3.550645158 | 2.100314785 | NA          | NA |
| ASV_its_465 | 0.138524394 | -0.169781748 | 3.550698426 | 0.62856747  | NA          | NA |
| ASV_its_466 | 0.423171731 | 0.060251258  | 3.550650341 | 1.955766604 | NA          | NA |
| ASV_its_467 | 0.475940872 | 0.4948276    | 3.550672391 | 2.103457267 | 0.953892829 | NA |
| ASV_its_468 | 0.275334115 | -0.243327474 | 3.505693459 | 1.39721205  | 0.985656504 | NA |
| ASV_its_469 | 0.111996809 | -0.169599323 | 3.550743814 | 0.533441484 | 0.999314586 | NA |
| ASV_its_470 | 1.032262583 | -0.02976005  | 3.550598022 | 1.828173682 | NA          | NA |
| ASV_its_471 | 0.623862731 | 1.39918927   | 3.549762225 | 0.768536138 | NA          | NA |
| ASV_its_472 | 0.437538285 | -0.01354503  | 3.550645357 | 1.966907641 | 0.961649204 | NA |
| ASV_its_473 | 0.422658987 | 0.278985559  | 3.550454633 | 1.007896025 | NA          | NA |
| ASV_its_474 | 0.732435743 | 0.358091467  | 3.550283542 | 1.269947085 | NA          | NA |
| ASV_its_475 | 0.289417361 | 0.734218869  | 3.549916953 | 1.169278172 | NA          | NA |
| ASV_its_476 | 0.555989511 | -0.029551482 | 3.550665563 | 1.513251499 | NA          | NA |
| ASV_its_477 | 0.395621285 | -0.643359721 | 3.550318049 | 1.0252368   | NA          | NA |
| ASV_its_478 | 0.990129416 | -0.029750152 | 3.550601383 | 1.806904271 | NA          | NA |
| ASV_its_479 | 0.880827304 | -0.029718307 | 3.550611592 | 1.747340246 | NA          | NA |
| ASV_its_480 | 0.375246423 | -0.079145939 | 3.550660204 | 1.254343896 | NA          | NA |
| ASV_its_481 | 0.467117819 | 0.385600661  | 3.549839302 | 1.904354332 | NA          | NA |
| ASV_its_482 | 0.750957462 | -0.02966699  | 3.550627588 | 1.666017528 | 0.975999817 | NA |
| ASV_its_483 | 0.524460188 | 0.688484786  | 3.550681204 | 1.338572424 | 0.987378896 | NA |
| ASV_its_484 | 0.650102754 | 0.419171964  | 3.549690519 | 0.988369468 | NA          | NA |
| ASV_its_485 | 0.363141699 | -0.079129896 | 3.550665063 | 1.237683764 | NA          | NA |
| ASV_its_486 | 0.526726906 | -0.029527433 | 3.550673692 | 1.485707145 | NA          | NA |
| ASV_its_487 | 0.578921922 | 0.357992789  | 3.549966714 | 1.072298132 | NA          | NA |
| ASV_its_488 | 0.823160087 | 0.937080872  | 3.550725047 | 1.486169418 | NA          | NA |
| ASV_its_489 | 0.60881611  | 0.425667572  | 3.550292364 | 0.754209296 | NA          | NA |
| ASV_its_490 | 0.481995179 | 0.688454308  | 3.550692356 | 1.295714646 | 0.988553616 | NA |
| ASV_its_491 | 0.421135219 | 0.315939471  | 3.55075784  | 1.317287041 | NA          | NA |
| ASV_its_492 | 0.400615568 | -0.07917688  | 3.550650986 | 1.287461045 | NA          | NA |
| ASV_its_493 | 0.515021863 | -0.029515634 | 3.550677202 | 1.474259739 | NA          | NA |
| ASV_its_494 | 0.39366355  | -0.079169101 | 3.550653399 | 1.278552916 | 0.989004375 | NA |
| ASV_its_495 | 0.347002068 | -0.079105323 | 3.550672068 | 1.214592878 | NA          | NA |
| ASV_its_496 | 0.314875916 | -0.074020948 | 3.550705027 | 1.189623593 | NA          | NA |
| ASV_its_497 | 0.116657089 | 0.220120211  | 3.55082448  | 0.524677658 | NA          | NA |
| ASV_its_498 | 0.394662465 | 0.35796002   | 3.550340825 | 0.944066085 | NA          | NA |
| ASV_its_499 | 0.384051315 | 0.332532278  | 3.550689528 | 2.113523195 | 0.953290618 | NA |
| ASV_its_500 | 0.260463865 | 0.734185671  | 3.550988112 | 1.049531243 | NA          | NA |
| ASV_its_501 | 0.960847994 | 1.252429059  | 3.549631853 | 1.142637451 | NA          | NA |
| ASV_its_502 | 0.41314588  | 0.397039248  | 3.550733127 | 2.014128672 | NA          | NA |
| ASV_its_503 | 0.386428188 | 0.764537039  | 3.550108683 | 1.678004362 | 0.975500302 | NA |
| ASV_its_504 | 0.412919094 | 1.039756579  | 3.54960393  | 0.746478035 | 0.99795258  | NA |
| ASV_its_505 | 0.392744081 | -0.549230317 | 3.549532533 | 0.819113883 | NA          | NA |
| ASV_its_506 | 0.330862437 | -0.079079903 | 3.550679755 | 1.19040963  | NA          | NA |
| ASV_its_507 | 0.36951841  | 0.688322604  | 3.55073426  | 1.16082452  | NA          | NA |
| ASV_its_508 | 0.083998716 | -0.169283091 | 3.550822677 | 0.415434039 | 0.99970102  | NA |
| ASV_its_509 | 0.339353961 | -0.079092764 | 3.550675628 | 1.203207555 | 0.990852857 | NA |
| ASV_its_510 | 0.488154634 | -0.074264042 | 3.550637144 | 1.411886442 | NA          | NA |
| ASV_its_511 | 0.394748133 | 0.310931545  | 3.550753882 | 1.261430202 | 0.989443029 | NA |
| ASV_its_512 | 0.652768916 | 0.360427515  | 3.550749667 | 1.578874055 | NA          | NA |
| ASV_its_513 | 0.364352942 | -0.079131179 | 3.550664585 | 1.239176318 | NA          | NA |
| ASV_its_514 | 0.350538622 | -0.079111009 | 3.550670496 | 1.219589048 | NA          | NA |
| ASV_its_515 | 0.639315177 | 0.360426512  | 3.55075295  | 1.568263153 | NA          | NA |
| ASV_its_516 | 0.45483307  | 0.973391093  | 3.550644953 | 1.075281928 | 0.993521035 | NA |
| ASV_its_517 | 0.077047034 | 0.04404661   | 3.550835775 | 0.520743736 | NA          | NA |
| ASV_its_518 | 0.36598627  | 0.80665718   | 3.550196101 | 1.509224409 | 0.981988592 | NA |

|             |             |              |             |             |             |    |
|-------------|-------------|--------------|-------------|-------------|-------------|----|
| ASV_its_519 | 0.306652991 | -0.079035247 | 3.5506928   | 1.151859163 | NA          | NA |
| ASV_its_520 | 0.318581213 | 0.211741502  | 3.550703536 | 1.910008264 | NA          | NA |
| ASV_its_521 | 0.237323866 | 0.596163943  | 3.550665727 | 0.794143898 | NA          | NA |
| ASV_its_522 | 0.587250413 | 0.153282532  | 3.550652168 | 1.500400237 | NA          | NA |
| ASV_its_523 | 0.132457809 | 0.220097853  | 3.550795024 | 0.580873541 | NA          | NA |
| ASV_its_524 | 0.375200575 | 0.310932198  | 3.550762527 | 1.235572606 | 0.99008465  | NA |
| ASV_its_525 | 0.29051336  | -0.079002283 | 3.550702703 | 1.1244529   | NA          | NA |
| ASV_its_526 | 0.326190679 | 0.360379657  | 3.550905438 | 1.226404757 | NA          | NA |
| ASV_its_527 | 0.556305152 | 0.360419155  | 3.550776719 | 1.497397457 | 0.982399623 | NA |
| ASV_its_528 | 0.223254741 | 0.733949785  | 3.551056437 | 0.972390495 | NA          | NA |
| ASV_its_529 | 0.223254741 | 0.733949785  | 3.551056437 | 0.972390495 | NA          | NA |
| ASV_its_530 | 0.59418709  | 0.360422764  | 3.550765056 | 1.530917705 | NA          | NA |
| ASV_its_531 | 0.413561765 | -0.549404692 | 3.549490439 | 0.835536477 | NA          | NA |
| ASV_its_532 | 0.303073766 | 0.426375354  | 3.549752378 | 1.578778062 | 0.97945638  | NA |
| ASV_its_533 | 0.408160772 | 0.290943138  | 3.549900345 | 1.583149637 | NA          | NA |
| ASV_its_534 | 0.282429195 | -0.078978937 | 3.550708088 | 1.110159038 | 0.992850572 | NA |
| ASV_its_535 | 0.374483297 | 0.715341059  | 3.549783862 | 1.490801515 | NA          | NA |
| ASV_its_536 | 0.386808776 | 1.037803115  | 3.550070986 | 1.269595113 | 0.989235234 | NA |
| ASV_its_537 | 0.283269525 | -0.078985118 | 3.550707522 | 1.111610741 | 0.992821755 | NA |
| ASV_its_538 | 0.311257262 | 0.073728749  | 3.550695404 | 1.637856353 | NA          | NA |
| ASV_its_539 | 0.341564588 | 0.252073821  | 3.549972794 | 1.696128816 | NA          | NA |
| ASV_its_540 | 0.646564723 | -0.029614969 | 3.550645111 | 1.589586088 | NA          | NA |
| ASV_its_541 | 0.344227426 | 0.258710873  | 3.550182144 | 0.799389954 | 0.997450174 | NA |
| ASV_its_542 | 0.326498091 | 0.693402626  | 3.550779449 | 1.122563735 | NA          | NA |
| ASV_its_543 | 0.352231217 | -0.074093713 | 3.550684797 | 1.246097192 | NA          | NA |
| ASV_its_544 | 0.309566575 | -0.079040975 | 3.550691146 | 1.156481891 | NA          | NA |
| ASV_its_545 | 0.308068974 | 0.360374004  | 3.550923721 | 1.197356227 | NA          | NA |
| ASV_its_546 | 0.441219983 | 0.688412971  | 3.550705126 | 1.250449523 | 0.989718545 | NA |
| ASV_its_547 | 0.299329122 | -0.029171226 | 3.550790775 | 1.198650923 | NA          | NA |
| ASV_its_548 | 0.308501947 | 0.333673292  | 3.550109852 | 1.528549667 | NA          | NA |
| ASV_its_549 | 0.617651519 | 0.735009816  | 3.55075011  | 1.486747102 | NA          | NA |
| ASV_its_550 | 0.587953972 | 0.315939376  | 3.55070955  | 1.486422204 | NA          | NA |
| ASV_its_551 | 0.313929448 | 0.310934485  | 3.550796556 | 1.145021741 | NA          | NA |
| ASV_its_552 | 0.459311728 | 0.419034478  | 3.550013742 | 0.876178078 | NA          | NA |
| ASV_its_553 | 0.295435355 | 0.258768244  | 3.55079959  | 1.264812456 | 0.989357255 | NA |
| ASV_its_554 | 0.478368408 | -0.029478845 | 3.550689347 | 1.436304023 | NA          | NA |
| ASV_its_555 | 0.577776847 | 0.737861414  | 3.550797077 | 1.507106237 | NA          | NA |
| ASV_its_556 | 0.293463075 | 0.688176149  | 3.550780784 | 1.043851004 | NA          | NA |
| ASV_its_557 | 0.302838809 | 0.693341642  | 3.55079715  | 1.08440112  | NA          | NA |
| ASV_its_558 | 0.082001485 | -0.169253394 | 3.550830422 | 0.405995161 | NA          | NA |
| ASV_its_559 | 0.096630736 | 0.220159066  | 3.550875741 | 0.44543131  | 0.999622779 | NA |
| ASV_its_560 | 0.195347899 | 0.733715352  | 3.551124627 | 0.906642974 | NA          | NA |
| ASV_its_561 | 0.271562537 | 1.109453236  | 3.550636059 | 0.802898243 | 0.997414263 | NA |
| ASV_its_562 | 0.298106953 | 0.315939573  | 3.550828088 | 1.141618102 | NA          | NA |
| ASV_its_563 | 0.319152191 | -0.274080358 | 3.551417578 | 0.541808683 | 0.999278539 | NA |
| ASV_its_564 | 0.298788682 | 1.089499536  | 3.550548013 | 0.824137282 | 0.99718975  | NA |
| ASV_its_565 | 0.338778878 | 1.005522827  | 3.550671085 | 0.913886766 | 0.996100689 | NA |
| ASV_its_566 | 0.291800766 | 1.397934439  | 3.55068545  | 0.708220872 | NA          | NA |
| ASV_its_567 | 0.357003792 | -0.029303593 | 3.550747057 | 1.287715838 | NA          | NA |
| ASV_its_568 | 0.510498768 | 0.360414135  | 3.550793155 | 1.453502106 | NA          | NA |
| ASV_its_569 | 0.294671148 | 0.596221119  | 3.550643249 | 0.902196774 | 0.996255829 | NA |
| ASV_its_570 | 0.368684609 | 0.688318294  | 3.550734738 | 1.159144185 | 0.991837373 | NA |
| ASV_its_571 | 0.485767226 | 0.360410913  | 3.550803301 | 1.428217296 | 0.984691277 | NA |
| ASV_its_572 | 0.416430127 | 0.688384595  | 3.550714104 | 1.220908195 | 0.990437496 | NA |
| ASV_its_573 | 0.375579873 | 0.734619703  | 3.55086229  | 1.23399621  | NA          | NA |
| ASV_its_574 | 0.272003257 | -0.078956115 | 3.550715536 | 1.090935928 | 0.993225278 | NA |
| ASV_its_575 | 0.270536272 | 0.688115494  | 3.550799925 | 1.002753645 | NA          | NA |
| ASV_its_576 | 0.282839776 | 0.990157313  | 3.550153034 | 1.017044109 | NA          | NA |
| ASV_its_577 | 0.369320209 | 0.734603064  | 3.550867138 | 1.22544494  | NA          | NA |
| ASV_its_578 | 0.6032144   | 1.238385589  | 3.550034655 | 0.99072331  | NA          | NA |
| ASV_its_579 | 0.264042079 | -0.078938061 | 3.550721591 | 1.075955282 | NA          | NA |
| ASV_its_580 | 0.297955316 | 0.715831208  | 3.550268771 | 1.384790383 | 0.986032572 | NA |
| ASV_its_581 | 0.338235388 | 0.987396682  | 3.550700109 | 0.921582656 | 0.995996316 | NA |
| ASV_its_582 | 0.179844097 | 0.73355458   | 3.551171577 | 0.866693969 | NA          | NA |
| ASV_its_583 | 0.482904392 | 0.203723041  | 3.550760595 | 1.432345228 | NA          | NA |
| ASV_its_584 | 0.193012647 | -0.078681339 | 3.550797565 | 0.919972248 | NA          | NA |
| ASV_its_585 | 0.121304436 | 0.595878762  | 3.550776208 | 0.480094186 | 0.999516153 | NA |

|             |             |              |             |             |             |    |
|-------------|-------------|--------------|-------------|-------------|-------------|----|
| ASV_its_586 | 0.225954835 | -0.078820468 | 3.550756422 | 0.997817621 | NA          | NA |
| ASV_its_587 | 0.254937179 | -0.078913337 | 3.550728982 | 1.058246663 | NA          | NA |
| ASV_its_588 | 0.266036453 | 1.011851603  | 3.55023677  | 0.681879602 | 0.998471124 | NA |
| ASV_its_589 | 0.264983958 | 0.693222417  | 3.550832027 | 1.016906947 | NA          | NA |
| ASV_its_590 | 0.441137257 | 0.315939425  | 3.550750206 | 1.340155671 | NA          | NA |
| ASV_its_591 | 0.286731782 | 0.310935718  | 3.55081634  | 1.098847189 | NA          | NA |
| ASV_its_592 | 0.245866835 | 0.310938243  | 3.550854176 | 1.021196283 | NA          | NA |
| ASV_its_593 | 0.359591148 | 1.012034997  | 3.550156032 | 0.776343543 | 0.997677946 | NA |
| ASV_its_594 | 0.489961643 | 0.315939426  | 3.550734002 | 1.393439195 | NA          | NA |
| ASV_its_595 | 0.434930414 | 0.403340218  | 3.55034874  | 0.927719926 | NA          | NA |
| ASV_its_596 | 0.23766844  | -0.078859606 | 3.550744543 | 1.022980476 | 0.994449262 | NA |
| ASV_its_597 | 0.270476544 | 0.310779386  | 3.550862578 | 0.88370948  | NA          | NA |
| ASV_its_598 | 0.241396529 | 0.310938499  | 3.550859095 | 1.011932559 | NA          | NA |
| ASV_its_599 | 0.48105325  | 0.315939437  | 3.550736719 | 1.384082046 | NA          | NA |
| ASV_its_600 | 0.185250567 | 0.366833725  | 3.551604721 | 0.645639426 | NA          | NA |
| ASV_its_601 | 0.381582051 | 0.418940232  | 3.550237355 | 0.816304122 | NA          | NA |
| ASV_its_602 | 0.159204014 | 0.220070069  | 3.550758472 | 0.666006273 | NA          | NA |
| ASV_its_603 | 0.264314749 | 0.310936862  | 3.550835665 | 1.05761432  | 0.993844835 | NA |
| ASV_its_604 | 0.272194456 | 0.310936532  | 3.550828516 | 1.072461603 | 0.993573433 | NA |
| ASV_its_605 | 0.256866768 | -0.370032752 | 3.549886985 | 0.971327386 | NA          | NA |
| ASV_its_606 | 0.23231514  | -0.028935106 | 3.550868843 | 1.070692056 | NA          | NA |
| ASV_its_607 | 0.239566771 | 0.310938531  | 3.550861174 | 1.008030851 | 0.994697945 | NA |
| ASV_its_608 | 0.331303089 | 0.596249163  | 3.550632941 | 0.961336963 | NA          | NA |
| ASV_its_609 | 0.48663453  | 0.734846104  | 3.550797078 | 1.365182165 | NA          | NA |
| ASV_its_610 | 0.345793656 | 1.289232123  | 3.550436266 | 0.729372589 | 0.998099732 | NA |
| ASV_its_611 | 0.177478247 | 0.274870335  | 3.550100838 | 0.889804966 | 0.996415846 | NA |
| ASV_its_612 | 0.537197875 | -0.029535327 | 3.550670784 | 1.49482313  | NA          | NA |
| ASV_its_613 | 0.292740929 | 0.688173913  | 3.550781411 | 1.042196698 | NA          | NA |
| ASV_its_614 | 0.199210671 | 0.392844532  | 3.55114109  | 0.603524818 | NA          | NA |
| ASV_its_615 | 0.199210671 | 0.392844532  | 3.55114109  | 0.603524818 | NA          | NA |
| ASV_its_616 | 0.393872551 | 0.31593942   | 3.550769743 | 1.282402877 | NA          | NA |
| ASV_its_617 | 0.261484679 | 0.935592084  | 3.550819832 | 0.79588605  | NA          | NA |
| ASV_its_618 | 0.067876953 | -0.168987    | 3.550897575 | 0.336522977 | NA          | NA |
| ASV_its_619 | 0.165923153 | -0.078526109 | 3.550843654 | 0.846340457 | NA          | NA |
| ASV_its_620 | 0.20328607  | -0.078727288 | 3.550783368 | 0.945162753 | 0.995665305 | NA |
| ASV_its_621 | 0.366250812 | -0.029321579 | 3.55074139  | 1.300260433 | NA          | NA |
| ASV_its_622 | 0.255451951 | 0.310937591  | 3.550844263 | 1.040239206 | NA          | NA |
| ASV_its_623 | 0.151937254 | 0.733011098  | 3.551279629 | 0.787503688 | NA          | NA |
| ASV_its_624 | 0.055417843 | -0.168639592 | 3.550984833 | 0.269460499 | NA          | NA |
| ASV_its_625 | 0.103368419 | 0.220144426  | 3.550856452 | 0.472535966 | 0.999540959 | NA |
| ASV_its_626 | 0.220097306 | 0.687939807  | 3.550856028 | 0.899370765 | NA          | NA |
| ASV_its_627 | 0.449201104 | 0.734782519  | 3.550815517 | 1.324375844 | NA          | NA |
| ASV_its_628 | 0.245030412 | -0.073828596 | 3.550759611 | 1.062247816 | NA          | NA |
| ASV_its_629 | 0.378117649 | 0.315939455  | 3.550777339 | 1.26160406  | NA          | NA |
| ASV_its_630 | 0.065106465 | -0.168920058 | 3.550914138 | 0.322070142 | NA          | NA |
| ASV_its_631 | 0.332117711 | 0.418857926  | 3.550433655 | 0.771479296 | NA          | NA |
| ASV_its_632 | 0.330016752 | -0.548568561 | 3.549693916 | 0.762506986 | NA          | NA |
| ASV_its_633 | 0.155764592 | -0.078454599 | 3.550865054 | 0.816137315 | NA          | NA |
| ASV_its_634 | 0.160850708 | -0.078491726 | 3.550854021 | 0.831372777 | NA          | NA |
| ASV_its_635 | 0.265793758 | 1.125192096  | 3.550355952 | 0.605410325 | NA          | NA |
| ASV_its_636 | 0.132973898 | 0.595929418  | 3.550756476 | 0.519319125 | NA          | NA |
| ASV_its_637 | 0.187633703 | -0.076757621 | 3.550835379 | 0.853539505 | NA          | NA |
| ASV_its_638 | 0.062335977 | -0.16884859  | 3.550932163 | 0.307289394 | NA          | NA |
| ASV_its_639 | 0.134903289 | 0.220094952  | 3.550791217 | 0.588447989 | NA          | NA |
| ASV_its_640 | 0.271347873 | 0.688117336  | 3.55079931  | 1.00362734  | 0.99476981  | NA |
| ASV_its_641 | 0.266019343 | -0.617756528 | 3.549868596 | 0.715778322 | NA          | NA |
| ASV_its_642 | 0.352966021 | 0.290962735  | 3.551084907 | 0.890877814 | NA          | NA |
| ASV_its_643 | 0.200307784 | -0.078715361 | 3.550787401 | 0.937673111 | NA          | NA |
| ASV_its_644 | 0.134385433 | 0.219736422  | 3.55089601  | 0.387399679 | 0.999763333 | NA |
| ASV_its_645 | 0.226269968 | 0.310939713  | 3.550877248 | 0.97902997  | 0.995159756 | NA |
| ASV_its_646 | 0.365322958 | 0.360389806  | 3.550872347 | 1.282932287 | NA          | NA |
| ASV_its_647 | 0.252560801 | 0.688060454  | 3.55081745  | 0.967656218 | NA          | NA |
| ASV_its_648 | 0.235266741 | 0.68799994   | 3.550836704 | 0.9322491   | NA          | NA |
| ASV_its_649 | 0.208201681 | 0.692963798  | 3.550908025 | 0.896483308 | NA          | NA |
| ASV_its_650 | 0.055969267 | -0.168657796 | 3.550980247 | 0.272426809 | NA          | NA |
| ASV_its_651 | 0.203469825 | -0.078729806 | 3.550783185 | 0.945333251 | NA          | NA |
| ASV_its_652 | 0.217506274 | 0.310940478  | 3.55088887  | 0.959221749 | 0.995459799 | NA |



|             |             |              |             |             |             |    |
|-------------|-------------|--------------|-------------|-------------|-------------|----|
| ASV_its_653 | 0.27396217  | 0.596203696  | 3.550650334 | 0.865015005 | NA          | NA |
| ASV_its_654 | 0.32420019  | -0.680775858 | 3.550110143 | 0.84961153  | NA          | NA |
| ASV_its_655 | 0.152142165 | -0.078425878 | 3.550873422 | 0.804847567 | 0.997394167 | NA |
| ASV_its_656 | 0.249345739 | 0.873491995  | 3.550582676 | 1.272369691 | 0.989164051 | NA |
| ASV_its_657 | 0.130231932 | 0.729218277  | 3.55138729  | 0.717926556 | NA          | NA |
| ASV_its_658 | 0.188575759 | 1.005194322  | 3.550888587 | 0.589557179 | NA          | NA |
| ASV_its_659 | 0.118520214 | 0.595865812  | 3.550781622 | 0.469882025 | NA          | NA |
| ASV_its_660 | 0.333780427 | 0.688260766  | 3.550753653 | 1.108022962 | NA          | NA |
| ASV_its_661 | 0.256126469 | 1.138547658  | 3.550451711 | 0.720396091 | NA          | NA |
| ASV_its_662 | 0.328900156 | 1.161326364  | 3.550618965 | 0.785853042 | NA          | NA |
| ASV_its_663 | 0.229600729 | -0.658739721 | 3.550600121 | 0.736680097 | NA          | NA |
| ASV_its_664 | 0.210368992 | 0.319470512  | 3.551294438 | 0.594685678 | NA          | NA |
| ASV_its_665 | 0.188461038 | 0.218664708  | 3.550522458 | 1.014396009 | 0.994592954 | NA |
| ASV_its_666 | 0.33211178  | 0.360381296  | 3.550900166 | 1.234365328 | NA          | NA |
| ASV_its_667 | 0.174236355 | -0.028586787 | 3.550984807 | 0.928473619 | NA          | NA |
| ASV_its_668 | 0.184542399 | 0.692808932  | 3.550953429 | 0.837659117 | NA          | NA |
| ASV_its_669 | 0.267365635 | -0.563304857 | 3.550194534 | 0.765408928 | NA          | NA |
| ASV_its_670 | 0.244126918 | 0.734089589  | 3.551016003 | 1.015667979 | NA          | NA |
| ASV_its_671 | 0.172735876 | 0.057991179  | 3.550828591 | 1.105265917 | 0.992947163 | NA |
| ASV_its_672 | 0.163994686 | -0.07851185  | 3.550847667 | 0.840158907 | 0.997012192 | NA |
| ASV_its_673 | 0.178516955 | 0.221179469  | 3.550889488 | 1.217783596 | 0.990511653 | NA |
| ASV_its_674 | 0.129540483 | 0.2253344    | 3.550993229 | 0.371480331 | 0.9997944   | NA |
| ASV_its_675 | 0.198105594 | 0.310942364  | 3.550918284 | 0.912533959 | NA          | NA |
| ASV_its_676 | 0.174243701 | 0.687692561  | 3.550935105 | 0.785595585 | NA          | NA |
| ASV_its_677 | 0.253422921 | -0.401534737 | 3.550313913 | 0.630654707 | NA          | NA |
| ASV_its_678 | 0.188444743 | 0.681748959  | 3.551276831 | 0.857444202 | 0.99681257  | NA |
| ASV_its_679 | 0.149825345 | -0.071586777 | 3.550889212 | 0.755245358 | NA          | NA |
| ASV_its_680 | 0.174294634 | 0.489763132  | 3.550919906 | 1.257846272 | 0.989533449 | NA |
| ASV_its_681 | 0.175078687 | 0.692735837  | 3.550975011 | 0.812423285 | NA          | NA |
| ASV_its_682 | 0.185497174 | 0.229350114  | 3.550944152 | 0.731875758 | NA          | NA |
| ASV_its_683 | 0.245519992 | 0.872711585  | 3.550601515 | 1.040052223 | 0.994156306 | NA |
| ASV_its_684 | 0.198914335 | -0.067412006 | 3.550655133 | 1.10991251  | NA          | NA |
| ASV_its_685 | 0.14525668  | -0.078368383 | 3.550890456 | 0.782885761 | NA          | NA |
| ASV_its_686 | 0.182352849 | 0.270942455  | 3.550385425 | 0.994336989 | 0.994919372 | NA |
| ASV_its_687 | 0.229363677 | 0.596152668  | 3.550669876 | 0.775733348 | NA          | NA |
| ASV_its_688 | 0.111627371 | 0.719362204  | 3.551481941 | 0.651919529 | NA          | NA |
| ASV_its_689 | 0.156187455 | -0.560478673 | 3.551017886 | 0.605551794 | NA          | NA |
| ASV_its_690 | 0.271423415 | -0.678463739 | 3.550373232 | 0.792142328 | NA          | NA |
| ASV_its_691 | 0.178516993 | 0.057682718  | 3.550945925 | 0.842683371 | NA          | NA |
| ASV_its_692 | 0.063507169 | 0.220276806  | 3.551031095 | 0.290134241 | NA          | NA |
| ASV_its_693 | 0.222992464 | 0.596143919  | 3.550673306 | 0.761690873 | NA          | NA |
| ASV_its_694 | 0.200900637 | 0.687849149  | 3.550884904 | 0.853810273 | NA          | NA |
| ASV_its_695 | 0.200900637 | 0.687849149  | 3.550884904 | 0.853810273 | NA          | NA |
| ASV_its_696 | 0.171171662 | 0.687670452  | 3.55094197  | 0.776972614 | 0.997671915 | NA |
| ASV_its_697 | 0.284934511 | 0.68815432   | 3.550787772 | 1.027646449 | NA          | NA |
| ASV_its_698 | 0.041979176 | -0.128071961 | 3.551801983 | 0.242202327 | 0.999951631 | NA |
| ASV_its_699 | 0.137186864 | -0.078294765 | 3.550912496 | 0.75634734  | NA          | NA |
| ASV_its_700 | 0.168057401 | 0.460443656  | 3.551012547 | 0.820198275 | 0.997232318 | NA |
| ASV_its_701 | 0.173758266 | 0.310945406  | 3.550964417 | 0.84811925  | NA          | NA |
| ASV_its_702 | 0.131449797 | 0.595922703  | 3.550759147 | 0.500945756 | 0.999443011 | NA |
| ASV_its_703 | 0.276793525 | 0.688132912  | 3.550794627 | 1.012968617 | NA          | NA |
| ASV_its_704 | 0.175546307 | 0.312638574  | 3.551024274 | 0.732874085 | NA          | NA |
| ASV_its_705 | 0.2515078   | 0.7341332    | 3.551003287 | 1.030187004 | NA          | NA |
| ASV_its_706 | 0.141539033 | -0.186014397 | 3.550514928 | 0.668546961 | NA          | NA |
| ASV_its_707 | 0.150230838 | -0.078410489 | 3.550878143 | 0.798351089 | NA          | NA |
| ASV_its_708 | 0.24665871  | -0.028996404 | 3.550848892 | 1.099564076 | NA          | NA |
| ASV_its_709 | 0.099127028 | 0.220153644  | 3.550868561 | 0.454765038 | NA          | NA |
| ASV_its_710 | 0.168647729 | 0.310946154  | 3.550975789 | 0.833609082 | NA          | NA |
| ASV_its_711 | 0.184763771 | 0.749059359  | 3.550712356 | 0.54388934  | 0.99926938  | NA |
| ASV_its_712 | 0.263872512 | 1.115138264  | 3.550837995 | 0.70905792  | NA          | NA |
| ASV_its_713 | 0.156151261 | -0.514439549 | 3.550712155 | 0.52432381  | NA          | NA |
| ASV_its_714 | 0.044327806 | -0.159644329 | 3.551068211 | 0.204154044 | NA          | NA |
| ASV_its_715 | 0.183680583 | 0.687752946  | 3.550915792 | 0.810252848 | NA          | NA |
| ASV_its_716 | 0.161202143 | 0.687596282  | 3.550965872 | 0.748669427 | 0.9979332   | NA |
| ASV_its_717 | 0.148642015 | 0.349320709  | 3.551813202 | 0.571399112 | NA          | NA |
| ASV_its_718 | 0.040349937 | -0.155222436 | 3.551105846 | 0.179470478 | NA          | NA |
| ASV_its_719 | 0.041730259 | -0.00808903  | 3.551085233 | 0.278697434 | 0.999922057 | NA |

|             |             |              |             |             |             |    |
|-------------|-------------|--------------|-------------|-------------|-------------|----|
| ASV_its_720 | 0.181428156 | -0.028641504 | 3.550966706 | 0.947444679 | NA          | NA |
| ASV_its_721 | 0.155397198 | 0.310948086  | 3.551008721 | 0.794369966 | 0.997500986 | NA |
| ASV_its_722 | 0.197507611 | 0.596102872  | 3.550689238 | 0.701821894 | NA          | NA |
| ASV_its_723 | 0.139695984 | 0.687399958  | 3.551028783 | 0.683478139 | NA          | NA |
| ASV_its_724 | 0.130902788 | 0.995889474  | 3.551025767 | 0.280395375 | 0.999920434 | NA |
| ASV_its_725 | 0.087428621 | -0.158338259 | 3.550872769 | 0.392029381 | 0.999753725 | NA |
| ASV_its_726 | 0.134027965 | -0.028170359 | 3.551123538 | 0.804379707 | NA          | NA |
| ASV_its_727 | 0.13209514  | 0.225720805  | 3.55097107  | 0.397946484 | 0.999741059 | NA |
| ASV_its_728 | 0.04117309  | 0.226583918  | 3.551217195 | 0.163273418 | NA          | NA |
| ASV_its_729 | 0.04117309  | 0.226583918  | 3.551217195 | 0.163273418 | NA          | NA |
| ASV_its_730 | 0.056655154 | 0.595227558  | 3.551032956 | 0.211445969 | NA          | NA |
| ASV_its_731 | 0.056655154 | 0.595227558  | 3.551032956 | 0.211445969 | NA          | NA |
| ASV_its_732 | 0.185375178 | -0.073547923 | 3.550838741 | 0.922887963 | NA          | NA |
| ASV_its_733 | 0.119157491 | 0.101446936  | 3.550980672 | 0.990915167 | 0.994973759 | NA |
| ASV_its_734 | 0.132021039 | -0.078241926 | 3.550928139 | 0.738361414 | NA          | NA |
| ASV_its_735 | 0.129560366 | -0.028108449 | 3.551144228 | 0.788864707 | NA          | NA |
| ASV_its_736 | 0.087111631 | 0.220184177  | 3.550908742 | 0.403254835 | NA          | NA |
| ASV_its_737 | 0.039800654 | 0.227341532  | 3.551232701 | 0.154786159 | NA          | NA |
| ASV_its_738 | 0.141803269 | 0.31095087   | 3.551048871 | 0.751317091 | 0.997909625 | NA |
| ASV_its_739 | 0.14820558  | 0.310949591  | 3.551029084 | 0.771871434 | NA          | NA |
| ASV_its_740 | 0.170843279 | 0.596038788  | 3.550710979 | 0.628925879 | 0.99882425  | NA |
| ASV_its_741 | 0.231887965 | 1.082700688  | 3.550959018 | 0.663988716 | NA          | NA |
| ASV_its_742 | 0.125817672 | -0.488971597 | 3.551221142 | 0.533684797 | NA          | NA |
| ASV_its_743 | 0.137223835 | -0.489354986 | 3.550899118 | 0.483819729 | NA          | NA |
| ASV_its_744 | 0.217411197 | 0.379127197  | 3.551408445 | 0.708060589 | NA          | NA |
| ASV_its_745 | 0.097909126 | -0.077762477 | 3.551071111 | 0.608735578 | NA          | NA |
| ASV_its_746 | 0.143978338 | 0.614080956  | 3.551128978 | 0.756406411 | 0.997863809 | NA |
| ASV_its_747 | 0.086821288 | 0.694458712  | 3.55161832  | 0.552833627 | NA          | NA |
| ASV_its_748 | 0.173016832 | -0.073466496 | 3.550861912 | 0.887422688 | NA          | NA |
| ASV_its_749 | 0.127556688 | -0.471935293 | 3.550999514 | 0.461205563 | NA          | NA |
| ASV_its_750 | 0.031172537 | -0.143023904 | 3.551226954 | 0.120024135 | NA          | NA |
| ASV_its_751 | 0.091427043 | -0.077631619 | 3.551110276 | 0.580938551 | NA          | NA |
| ASV_its_752 | 0.120625169 | -0.027941997 | 3.551190123 | 0.75669453  | NA          | NA |
| ASV_its_753 | 0.140739951 | 0.701057768  | 3.551011953 | 0.766294493 | 0.997772907 | NA |
| ASV_its_754 | 0.137984506 | 0.310951729  | 3.551061628 | 0.738527276 | NA          | NA |
| ASV_its_755 | 0.133539691 | 0.934699157  | 3.551092951 | 0.494565772 | 0.999466137 | NA |
| ASV_its_756 | 0.123804735 | 0.68721056   | 3.551089365 | 0.630441493 | NA          | NA |
| ASV_its_757 | 0.187346754 | 0.692827925  | 3.550947812 | 0.839734981 | NA          | NA |
| ASV_its_758 | 0.145847715 | 0.410696912  | 3.550735023 | 0.626649135 | 0.998838064 | NA |
| ASV_its_759 | 0.15216555  | -0.028383832 | 3.551052314 | 0.856736693 | NA          | NA |
| ASV_its_760 | 0.149240474 | 0.687493178  | 3.550998868 | 0.711320292 | NA          | NA |
| ASV_its_761 | 0.119219374 | 0.687146999  | 3.551109824 | 0.614440983 | NA          | NA |
| ASV_its_762 | 0.178243757 | -0.530320731 | 3.550839289 | 0.631037364 | NA          | NA |
| ASV_its_763 | 0.080691071 | 0.163510565  | 3.55079319  | 0.395670433 | 0.999745983 | NA |
| ASV_its_764 | 0.093736764 | -0.077680376 | 3.551095873 | 0.590726525 | 0.999041836 | NA |
| ASV_its_765 | 0.034310909 | 0.230658378  | 3.551306411 | 0.120499382 | NA          | NA |
| ASV_its_766 | 0.113260652 | 0.360202548  | 3.55148557  | 0.71224815  | NA          | NA |
| ASV_its_767 | 0.112658052 | 0.687047112  | 3.551141946 | 0.590972574 | NA          | NA |
| ASV_its_768 | 0.114634014 | 0.687078377  | 3.55113191  | 0.598095396 | NA          | NA |
| ASV_its_769 | 0.028484439 | 0.01595611   | 3.551260087 | 0.124315874 | 0.999995095 | NA |
| ASV_its_770 | 0.093208498 | -0.072427    | 3.551157373 | 0.612583757 | NA          | NA |
| ASV_its_771 | 0.154856382 | 0.829660748  | 3.551091257 | 0.521362297 | 0.999364441 | NA |
| ASV_its_772 | 0.113564554 | -0.078018157 | 3.550995157 | 0.668769838 | NA          | NA |
| ASV_its_773 | 0.11303739  | 0.31095839   | 3.551165474 | 0.646542355 | 0.998713616 | NA |
| ASV_its_774 | 0.137760437 | 0.68737846   | 3.55103575  | 0.668925621 | NA          | NA |
| ASV_its_775 | 0.110048653 | 0.687004081  | 3.551155825 | 0.581325136 | NA          | NA |
| ASV_its_776 | 0.195383665 | 0.687809728  | 3.550894533 | 0.846590568 | NA          | NA |
| ASV_its_777 | 0.147154107 | -0.50275918  | 3.550800523 | 0.498688359 | 0.99945127  | NA |
| ASV_its_778 | 0.189058824 | 0.315939798  | 3.55096696  | 0.931121002 | NA          | NA |
| ASV_its_779 | 0.02993705  | -0.141084264 | 3.55124881  | 0.11168695  | NA          | NA |
| ASV_its_780 | 0.031860611 | -0.144034736 | 3.551215864 | 0.124420065 | NA          | NA |
| ASV_its_781 | 0.108832697 | -0.077947704 | 3.551015968 | 0.646158513 | NA          | NA |
| ASV_its_782 | 0.192483142 | 0.360313473  | 3.55112161  | 0.991855163 | NA          | NA |
| ASV_its_783 | 0.103645408 | 0.686889468  | 3.5511927   | 0.55727442  | NA          | NA |
| ASV_its_784 | 0.150511165 | 0.349813579  | 3.551805532 | 0.568503358 | 0.999154992 | NA |
| ASV_its_785 | 0.173772578 | -0.673587153 | 3.550716543 | 0.46181183  | NA          | NA |
| ASV_its_786 | 0.104100841 | -0.077871832 | 3.551038663 | 0.623392521 | NA          | NA |

|             |             |              |             |             |             |    |
|-------------|-------------|--------------|-------------|-------------|-------------|----|
| ASV_its_787 | 0.100153892 | -0.077803185 | 3.551059149 | 0.610020057 | NA          | NA |
| ASV_its_788 | 0.100267428 | 0.310963147  | 3.551238498 | 0.592352618 | 0.999033177 | NA |
| ASV_its_789 | 0.293356821 | 0.360368773  | 3.550941029 | 1.423561357 | NA          | NA |
| ASV_its_790 | 0.105451839 | 0.937706972  | 3.550855187 | 0.239157997 | 0.999953671 | NA |
| ASV_its_791 | 0.138101898 | 0.69235189   | 3.551087991 | 0.687809605 | 0.998427659 | NA |
| ASV_its_792 | 0.170085529 | -0.523538696 | 3.550921995 | 0.632041162 | NA          | NA |
| ASV_its_793 | 0.118833663 | -0.588542514 | 3.551155762 | 0.331851523 | 0.999859332 | NA |
| ASV_its_794 | 0.027333828 | -0.136582561 | 3.551300163 | 0.094212078 | 0.99999812  | NA |
| ASV_its_795 | 0.029090123 | -0.139708036 | 3.551264788 | 0.105963245 | 0.999997176 | NA |
| ASV_its_796 | 0.0888808   | 0.120891108  | 3.551136514 | 0.737811558 | 0.998028043 | NA |
| ASV_its_797 | 0.095601442 | -0.077716904 | 3.551084956 | 0.5866833   | 0.99906314  | NA |
| ASV_its_798 | 0.062954868 | 0.220280423  | 3.551035731 | 0.286296255 | 0.999914613 | NA |
| ASV_its_799 | 0.107662057 | 0.310960336  | 3.551194323 | 0.612463533 | 0.998921693 | NA |
| ASV_its_800 | 0.173323148 | 0.351857149  | 3.551553758 | 0.676784598 | 0.998507823 | NA |
| ASV_its_801 | 0.107321282 | 0.310960459  | 3.551196231 | 0.611218651 | 0.998928833 | NA |
| ASV_its_802 | 0.107321282 | 0.310960459  | 3.551196231 | 0.611218651 | 0.998928833 | NA |
| ASV_its_803 | 0.107321282 | 0.310960459  | 3.551196231 | 0.611218651 | 0.998928833 | NA |
| ASV_its_804 | 0.107022098 | 0.359214086  | 3.551528207 | 0.671567739 | 0.998544786 | NA |
| ASV_its_805 | 0.28002242  | 0.360363708  | 3.55095755  | 1.395282369 | 0.985715323 | NA |
| ASV_its_806 | 0.170960706 | 0.687669585  | 3.550943014 | 0.777244209 | 0.997669307 | NA |
| ASV_its_807 | 0.094637128 | -0.077697273 | 3.551090824 | 0.576205512 | 0.999116858 | NA |
| ASV_its_808 | 0.080698155 | -0.077367828 | 3.551189339 | 0.526145825 | 0.999345003 | NA |
| ASV_its_809 | 0.091048993 | -0.077622001 | 3.551113328 | 0.562967365 | 0.999181704 | NA |
| ASV_its_810 | 0.089351977 | -0.020401331 | 3.55140567  | 0.614949615 | 0.998907339 | NA |
| ASV_its_811 | 0.0568419   | 0.220317504  | 3.551084796 | 0.253477573 | 0.999943527 | NA |
| ASV_its_812 | 0.044093257 | 0.225093792  | 3.551188033 | 0.180271349 | 0.999982376 | NA |
| ASV_its_813 | 0.089406122 | 0.310968244  | 3.551316903 | 0.540289046 | 0.999285179 | NA |
| ASV_its_814 | 0.167376645 | 0.360289477  | 3.551200384 | 0.916859981 | 0.996060577 | NA |
| ASV_its_815 | 0.138775373 | 0.692350558  | 3.551085587 | 0.687557566 | 0.998429523 | NA |
| ASV_its_816 | 0.113568891 | 1.021685164  | 3.551478507 | 0.430936213 | 0.999662141 | NA |
| ASV_its_817 | 0.214376545 | 1.062263035  | 3.551040013 | 0.701184969 | 0.998326616 | NA |
| ASV_its_818 | 0.061763132 | -0.249648275 | 3.551747626 | 0.332028844 | 0.999859078 | NA |
| ASV_its_819 | 0.127134957 | 0.359506766  | 3.551575664 | 0.442698875 | 0.999630427 | NA |
| ASV_its_820 | 0.0802988   | 0.343446632  | 3.551759375 | 0.314682242 | 0.999882422 | NA |
| ASV_its_821 | 0.064337549 | -0.076801751 | 3.551358859 | 0.450017709 | 0.999609699 | NA |
| ASV_its_822 | 0.057073137 | 0.220316007  | 3.551082849 | 0.254628631 | 0.99994265  | NA |
| ASV_its_823 | 0.091763993 | 0.310966888  | 3.551298514 | 0.542276049 | 0.999276488 | NA |
| ASV_its_824 | 0.099052797 | 0.310963769  | 3.551246757 | 0.570650684 | 0.999144474 | NA |
| ASV_its_825 | 0.096829518 | 0.356691654  | 3.551599601 | 0.623054925 | 0.998859651 | NA |
| ASV_its_826 | 0.101592456 | 0.686838549  | 3.551205926 | 0.52988083  | 0.999329548 | NA |
| ASV_its_827 | 0.132075596 | 0.692268593  | 3.551112509 | 0.662607983 | 0.998606834 | NA |
| ASV_its_828 | 0.082432268 | -0.345025507 | 3.551590476 | 0.390204358 | 0.999757544 | NA |
| ASV_its_829 | 0.18959925  | -0.028699114 | 3.550948321 | 1.064597769 | 0.993718107 | NA |
| ASV_its_830 | 0.086934309 | 0.310969639  | 3.551337715 | 0.517194094 | 0.999381056 | NA |
| ASV_its_831 | 0.08046551  | 0.310973237  | 3.551397236 | 0.492004113 | 0.999475236 | NA |
| ASV_its_832 | 0.114681839 | 0.595847123  | 3.55078993  | 0.428592778 | 0.999668229 | NA |
| ASV_its_833 | 0.096245485 | 0.686735987  | 3.551241891 | 0.505542716 | 0.999425932 | NA |
| ASV_its_834 | 0.10475028  | 0.691770013  | 3.551257126 | 0.560068045 | 0.999195463 | NA |
| ASV_its_835 | 0.125124248 | 0.69216359   | 3.551143467 | 0.635572191 | 0.998783292 | NA |
| ASV_its_836 | 0.125124248 | 0.69216359   | 3.551143467 | 0.635572191 | 0.998783292 | NA |
| ASV_its_837 | 0.113428566 | -0.358248812 | 3.551535282 | 0.464880332 | 0.999565186 | NA |
| ASV_its_838 | 0.194457332 | 1.035831858  | 3.551140098 | 0.668252346 | 0.998567956 | NA |
| ASV_its_839 | 0.108510763 | -0.409415307 | 3.551474293 | 0.450373402 | 0.999608672 | NA |
| ASV_its_840 | 0.057565175 | -0.071515984 | 3.551434946 | 0.412934347 | 0.999706987 | NA |
| ASV_its_841 | 0.080441559 | -0.077359087 | 3.551191932 | 0.500276929 | 0.999445467 | NA |
| ASV_its_842 | 0.077391644 | -0.077270913 | 3.551218337 | 0.487772109 | 0.999490035 | NA |
| ASV_its_843 | 0.09949286  | -0.023092166 | 3.551322435 | 0.641100795 | 0.998748503 | NA |
| ASV_its_844 | 0.04495472  | 0.224669469  | 3.551180043 | 0.18527344  | 0.999980642 | NA |
| ASV_its_845 | 0.052028252 | 0.350716611  | 3.5510601   | 0.297730791 | 0.999902501 | NA |
| ASV_its_846 | 0.023331418 | 0.240611717  | 3.551537128 | 0.050530685 | 0.999999784 | NA |
| ASV_its_847 | 0.026425797 | 0.23650762   | 3.551462761 | 0.070072616 | 0.999999326 | NA |
| ASV_its_848 | 0.085057553 | 0.680053857  | 3.551468157 | 0.357449611 | 0.999819344 | NA |
| ASV_its_849 | 0.082104625 | 0.310972473  | 3.551381484 | 0.491289827 | 0.999477754 | NA |
| ASV_its_850 | 0.088626187 | 0.310968769  | 3.551323749 | 0.518356296 | 0.999376453 | NA |
| ASV_its_851 | 0.075995204 | 0.310976367  | 3.551444434 | 0.466775995 | 0.99955927  | NA |
| ASV_its_852 | 0.076607475 | 0.686195497  | 3.551415968 | 0.431777975 | 0.999659936 | NA |
| ASV_its_853 | 0.077951129 | 0.686240956  | 3.551401313 | 0.436159699 | 0.999648298 | NA |

|             |             |              |             |             |             |    |
|-------------|-------------|--------------|-------------|-------------|-------------|----|
| ASV_its_854 | 0.077951129 | 0.686240956  | 3.551401313 | 0.436159699 | 0.999648298 | NA |
| ASV_its_855 | 0.077951129 | 0.686240956  | 3.551401313 | 0.436159699 | 0.999648298 | NA |
| ASV_its_856 | 0.090898514 | 0.686611047  | 3.551282055 | 0.480443816 | 0.999514984 | NA |
| ASV_its_857 | 0.118172901 | 0.692048934  | 3.551178044 | 0.607314454 | 0.998951018 | NA |
| ASV_its_858 | 0.102440098 | 0.934614005  | 3.551773707 | 0.081920682 | 0.999998842 | NA |
| ASV_its_859 | 0.114788435 | -0.44386916  | 3.55112741  | 0.408179509 | 0.99971811  | NA |
| ASV_its_860 | 0.018472614 | -0.091326449 | 3.55147255  | 0.033118585 | 0.99999995  | NA |
| ASV_its_861 | 0.054178989 | -0.068583067 | 3.551479443 | 0.389251577 | 0.999759521 | NA |
| ASV_its_862 | 0.072839194 | -0.077125001 | 3.551262028 | 0.461522878 | 0.999575529 | NA |
| ASV_its_863 | 0.029031849 | 0.234417841  | 3.551402668 | 0.086596272 | 0.999998596 | NA |
| ASV_its_864 | 0.077274941 | 0.310975649  | 3.551430679 | 0.464651945 | 0.999565895 | NA |
| ASV_its_865 | 0.072101153 | 0.686020623  | 3.551469301 | 0.407728695 | 0.99971915  | NA |
| ASV_its_866 | 0.107903659 | 0.686965981  | 3.551168782 | 0.539727014 | 0.999287624 | NA |
| ASV_its_867 | 0.105083565 | 0.863625676  | 3.551818335 | 0.397909182 | 0.999741141 | NA |
| ASV_its_868 | 0.097945024 | -0.263121686 | 3.551562137 | 0.311884936 | 0.999885916 | NA |
| ASV_its_869 | 0.092324855 | -0.301101144 | 3.551618298 | 0.38929516  | 0.999759431 | NA |
| ASV_its_870 | 0.070977846 | -0.077059543 | 3.551281644 | 0.446105531 | 0.999620875 | NA |
| ASV_its_871 | 0.068286744 | -0.076959915 | 3.5513115   | 0.434500804 | 0.999652736 | NA |
| ASV_its_872 | 0.068286744 | -0.076959915 | 3.5513115   | 0.434500804 | 0.999652736 | NA |
| ASV_its_873 | 0.053775514 | 0.308154206  | 3.551902856 | 0.172410882 | 0.999984876 | NA |
| ASV_its_874 | 0.078199577 | 0.310974999  | 3.551421109 | 0.462236163 | 0.999573346 | NA |
| ASV_its_875 | 0.067054591 | 0.311445675  | 3.551553083 | 0.414332582 | 0.999703659 | NA |
| ASV_its_876 | 0.076658059 | 0.310976116  | 3.551437645 | 0.455416079 | 0.99959391  | NA |
| ASV_its_877 | 0.076658059 | 0.310976116  | 3.551437645 | 0.455416079 | 0.99959391  | NA |
| ASV_its_878 | 0.095568199 | 0.595722931  | 3.550837959 | 0.343993989 | 0.999841224 | NA |
| ASV_its_879 | 0.086100273 | 0.686487607  | 3.551322583 | 0.449948251 | 0.999609899 | NA |
| ASV_its_880 | 0.067594831 | 0.685842694  | 3.551529679 | 0.383039674 | 0.999772142 | NA |
| ASV_its_881 | 0.080204571 | 0.686314375  | 3.551378322 | 0.42772324  | 0.999670468 | NA |
| ASV_its_882 | 0.089768759 | 0.688440833  | 3.551367148 | 0.488340257 | 0.999488065 | NA |
| ASV_its_883 | 0.10408153  | 0.691764402  | 3.551262214 | 0.546169531 | 0.999259253 | NA |
| ASV_its_884 | 0.097161179 | 0.284848798  | 3.551755826 | 0.405703674 | 0.999723786 | NA |
| ASV_its_885 | 0.108705598 | 0.335959908  | 3.551949371 | 0.446639023 | 0.999619364 | NA |
| ASV_its_886 | 0.108705598 | 0.335959908  | 3.551949371 | 0.446639023 | 0.999619364 | NA |
| ASV_its_887 | 0.047406615 | -0.062211872 | 3.551586338 | 0.340749781 | 0.999846211 | NA |
| ASV_its_888 | 0.063734295 | -0.07634938  | 3.551366194 | 0.406556546 | 0.99972184  | NA |
| ASV_its_889 | 0.062546384 | -8.18E-04    | 3.551656804 | 0.457548274 | 0.999587556 | NA |
| ASV_its_890 | 0.062546384 | -8.18E-04    | 3.551656804 | 0.457548274 | 0.999587556 | NA |
| ASV_its_891 | 0.067615573 | 0.311271323  | 3.551547196 | 0.40861709  | 0.999717099 | NA |
| ASV_its_892 | 0.071774705 | 0.310979746  | 3.551494983 | 0.427131086 | 0.999671987 | NA |
| ASV_its_893 | 0.071774705 | 0.310979746  | 3.551494983 | 0.427131086 | 0.999671987 | NA |
| ASV_its_894 | 0.062584285 | 0.312963921  | 3.551606187 | 0.386866567 | 0.999764422 | NA |
| ASV_its_895 | 0.089196986 | 0.595671529  | 3.550858544 | 0.313485833 | 0.999883925 | NA |
| ASV_its_896 | 0.064195048 | 0.685683947  | 3.551580875 | 0.361501775 | 0.999812368 | NA |
| ASV_its_897 | 0.064195048 | 0.685683947  | 3.551580875 | 0.361501775 | 0.999812368 | NA |
| ASV_its_898 | 0.101035392 | 0.967711035  | 3.551569149 | 0.366505079 | 0.9998035   | NA |
| ASV_its_899 | 0.09887899  | 0.972455332  | 3.551623977 | 0.353996871 | 0.999825145 | NA |
| ASV_its_900 | 0.074857599 | 0.686133322  | 3.551436685 | 0.400046165 | 0.999736459 | NA |
| ASV_its_901 | 0.074857599 | 0.686133322  | 3.551436685 | 0.400046165 | 0.999736459 | NA |
| ASV_its_902 | 0.08147244  | 0.684271505  | 3.551439342 | 0.449286162 | 0.999611806 | NA |
| ASV_its_903 | 0.083784175 | 0.685496241  | 3.551418051 | 0.458560262 | 0.999584516 | NA |
| ASV_its_904 | 0.06624599  | 0.67236126   | 3.551599175 | 0.39119214  | 0.999755482 | NA |
| ASV_its_905 | 0.05699942  | -0.08716152  | 3.551839614 | 0.241029677 | 0.999952424 | NA |
| ASV_its_906 | 0.148702666 | 0.919105043  | 3.551498601 | 0.53007265  | 0.999328747 | NA |
| ASV_its_907 | 0.100940913 | 0.329461077  | 3.551995597 | 0.415014574 | 0.999702027 | NA |
| ASV_its_908 | 0.034464439 | 0.726427758  | 3.551852072 | 0.138689053 | 0.999992847 | NA |
| ASV_its_909 | 0.080178978 | 0.575527109  | 3.551556851 | 0.347876578 | 0.99983511  | NA |
| ASV_its_910 | 0.018008171 | -0.08758901  | 3.551482287 | 0.029808557 | 0.99999996  | NA |
| ASV_its_911 | 0.059181845 | -0.072781811 | 3.551416419 | 0.377582919 | 0.999782845 | NA |
| ASV_its_912 | 0.059181845 | -0.072781811 | 3.551416419 | 0.377582919 | 0.999782845 | NA |
| ASV_its_913 | 0.017841672 | 0.254160109  | 3.551654923 | 0.01643971  | 0.999999996 | NA |
| ASV_its_914 | 0.06278589  | 0.312902905  | 3.551603988 | 0.379218605 | 0.99979674  | NA |
| ASV_its_915 | 0.06278589  | 0.312902905  | 3.551603988 | 0.379218605 | 0.99979674  | NA |
| ASV_its_916 | 0.082825772 | 0.595611342  | 3.550882297 | 0.281793583 | 0.99991908  | NA |
| ASV_its_917 | 0.041136137 | 0.594782935  | 3.551187586 | 0.129532422 | 0.999994348 | NA |
| ASV_its_918 | 0.03757958  | 0.5946389    | 3.55123077  | 0.110298085 | 0.999996756 | NA |
| ASV_its_919 | 0.074620237 | 0.686123703  | 3.551439826 | 0.391395686 | 0.999755056 | NA |
| ASV_its_920 | 0.07565298  | 0.681005933  | 3.551498521 | 0.418901394 | 0.999692606 | NA |

|             |             |              |             |                |                |
|-------------|-------------|--------------|-------------|----------------|----------------|
| ASV_its_921 | 0.104285415 | 0.869013137  | 3.551589597 | 0.364469185    | 0.999807142 NA |
| ASV_its_922 | 0.088101208 | 0.303873667  | 3.551955643 | 0.361944995    | 0.999811594 NA |
| ASV_its_923 | 0.071131066 | 0.325123019  | 3.552033903 | 0.298636483    | 0.999901493 NA |
| ASV_its_924 | 0.02849382  | -0.075247593 | 3.551783318 | 0.132701772    | 0.999993856 NA |
| ASV_its_925 | 0.058105766 | 0.115621964  | 3.551742812 | 0.298549626    | 0.99990159 NA  |
| ASV_its_926 | 0.031732743 | 0.232471754  | 3.551351038 | 0.103247006    | 0.999997418 NA |
| ASV_its_927 | 0.057956206 | 0.314663173  | 3.551669718 | 0.349064118    | 0.999833208 NA |
| ASV_its_928 | 0.05907962  | 0.314243917  | 3.551653628 | 0.354170876    | 0.999824856 NA |
| ASV_its_929 | 0.060203033 | 0.313832347  | 3.551638097 | 0.359332436    | 0.999816125 NA |
| ASV_its_930 | 0.061521176 | 0.313358801  | 3.551620554 | 0.365454508    | 0.999805386 NA |
| ASV_its_931 | 0.061326447 | 0.313428114  | 3.551623101 | 0.364546226    | 0.999807006 NA |
| ASV_its_932 | 0.061326447 | 0.313428114  | 3.551623101 | 0.364546226    | 0.999807006 NA |
| ASV_its_933 | 0.061155485 | 0.343480672  | 3.551819933 | 0.42162911     | 0.999685873 NA |
| ASV_its_934 | 0.034688843 | 0.594498795  | 3.551272353 | 0.09441819     | 0.999998105 NA |
| ASV_its_935 | 0.055024326 | 0.681518209  | 3.551716447 | 0.30820287     | 0.999890405 NA |
| ASV_its_936 | 0.055024326 | 0.681518209  | 3.551716447 | 0.30820287     | 0.999890405 NA |
| ASV_its_937 | 0.097691832 | 0.686764198  | 3.551233278 | 0.486069552    | 0.999495907 NA |
| ASV_its_938 | 0.097691832 | 0.686764198  | 3.551233278 | 0.486069552    | 0.999495907 NA |
| ASV_its_939 | 0.097691832 | 0.686764198  | 3.551233278 | 0.486069552    | 0.999495907 NA |
| ASV_its_940 | 0.064163657 | 0.685681806  | 3.551582306 | 0.342116509    | 0.999844123 NA |
| ASV_its_941 | 0.06983352  | 0.676526267  | 3.551562203 | 0.387435905    | 0.999763259 NA |
| ASV_its_942 | 0.06983352  | 0.676526267  | 3.551562203 | 0.387435905    | 0.999763259 NA |
| ASV_its_943 | 0.056782277 | 0.658860845  | 3.551715344 | 0.335935058    | 0.999853411 NA |
| ASV_its_944 | 0.083416166 | 0.685263501  | 3.551422059 | 0.445634144    | 0.999622207 NA |
| ASV_its_945 | 0.083416166 | 0.685263501  | 3.551422059 | 0.445634144    | 0.999622207 NA |
| ASV_its_946 | 0.083265224 | 0.68518424   | 3.551423428 | 0.44496554     | 0.99962409 NA  |
| ASV_its_947 | 0.083265224 | 0.68518424   | 3.551423428 | 0.44496554     | 0.99962409 NA  |
| ASV_its_948 | 0.142043971 | 0.286341437  | 3.551801777 | 0.611992685    | 0.998924397 NA |
| ASV_its_949 | 0.142043971 | 0.286341437  | 3.551801777 | 0.611992685    | 0.998924397 NA |
| ASV_its_950 | 0.013581498 | 0.098130658  | 3.55193806  | 0.096929997    | 0.999997925 NA |
| ASV_its_951 | 0.073604449 | 0.341540105  | 3.5518614   | 0.241784275    | 0.999951915 NA |
| ASV_its_952 | 0.05205042  | -0.066603654 | 3.551511745 | 0.326299362    | 0.999867113 NA |
| ASV_its_953 | 0.054611926 | 0.315973126  | 3.55172184  | 0.324954299    | 0.999868953 NA |
| ASV_its_954 | 0.057346356 | 0.314906931  | 3.551679203 | 0.33774501     | 0.999850732 NA |
| ASV_its_955 | 0.049173367 | 0.318258049  | 3.551819807 | 0.300635732    | 0.999899243 NA |
| ASV_its_956 | 0.089550846 | 0.68657471   | 3.551294712 | 0.445354699    | 0.999622995 NA |
| ASV_its_957 | 0.089550846 | 0.68657471   | 3.551294712 | 0.445354699    | 0.999622995 NA |
| ASV_its_958 | 0.089550846 | 0.68657471   | 3.551294712 | 0.445354699    | 0.999622995 NA |
| ASV_its_959 | 0.058816685 | 0.685373104  | 3.551667351 | 0.312098913    | 0.999885652 NA |
| ASV_its_960 | 0.058816685 | 0.685373104  | 3.551667351 | 0.312098913    | 0.999885652 NA |
| ASV_its_961 | 0.065830423 | 0.671738307  | 3.551604825 | 0.362598349    | 0.999810448 NA |
| ASV_its_962 | 0.076464819 | 0.681427348  | 3.551490684 | 0.409050927    | 0.999716094 NA |
| ASV_its_963 | 0.0631402   | -0.208297594 | 3.551872308 | 0.270911386    | 0.999929203 NA |
| ASV_its_964 | 0.048400315 | 0.594964401  | 3.551985026 | 0.183532029    | 0.999981259 NA |
| ASV_its_965 | 0.099783757 | 0.769783117  | 3.551746066 | 0.347086742    | 0.999836367 NA |
| ASV_its_966 | 0.089363843 | -0.199203868 | 3.551741642 | 0.370489288    | 0.999796235 NA |
| ASV_its_967 | 0.033861868 | -0.019905305 | 3.551802464 | 0.236256855    | 0.999955558 NA |
| ASV_its_968 | 0.039907953 | -0.044476855 | 3.551710631 | 0.260775587    | 0.999937805 NA |
| ASV_its_969 | 0.040518196 | 0.207770938  | 3.551714256 | 0.28496627     | 0.99991595 NA  |
| ASV_its_970 | 0.013724363 | 0.269088817  | 3.551741867 | -0.006752295   | 1 NA           |
| ASV_its_971 | 0.048296838 | 0.318664395  | 3.551838221 | 0.286532177    | 0.999914374 NA |
| ASV_its_972 | 0.048296838 | 0.318664395  | 3.551838221 | 0.286532177    | 0.999914374 NA |
| ASV_its_973 | 0.063324532 | 0.487786357  | 3.551497856 | 0.401266909    | 0.999733759 NA |
| ASV_its_974 | 0.0675531   | 0.324521123  | 3.551954777 | 0.28684431     | 0.999914057 NA |
| ASV_its_975 | 0.031643182 | 0.593020521  | 3.551322343 | 0.073415272    | 0.99999208 NA  |
| ASV_its_976 | 0.045853605 | 0.659913029  | 3.551816004 | 0.251896022    | 0.999944717 NA |
| ASV_its_977 | 0.08140986  | 0.686345753  | 3.55136837  | 0.403060587    | 0.999729758 NA |
| ASV_its_978 | 0.0581946   | 0.661016594  | 3.551697399 | 0.321658309    | 0.999873385 NA |
| ASV_its_979 | 0.08021955  | 0.769783117  | 3.551746066 | 0.277160145    | 0.999923505 NA |
| ASV_its_980 | 0.055612553 | 0.310752823  | 3.55198471  | 0.226970805    | 0.999961238 NA |
| ASV_its_981 | 0.096469445 | 0.721177202  | 3.551805296 | 0.330551003    | 0.999861182 NA |
| ASV_its_982 | 0.045463896 | 0.684822871  | 3.551853053 | 0.16445268     | 0.999987142 NA |
| ASV_its_983 | 0.16013918  | -0.144431501 | 3.551787436 | 0.633878996 NA | NA             |
| ASV_its_984 | 0.082946118 | -0.106751449 | 3.551927536 | 0.31705993     | 0.999879394 NA |
| ASV_its_985 | 0.060221822 | 0.337884664  | 3.551939124 | 0.182870961    | 0.999981489 NA |
| ASV_its_986 | 0.030475681 | -0.003657509 | 3.551860755 | 0.209143411    | 0.999970687 NA |
| ASV_its_987 | 0.04020839  | 0.047435352  | 3.551811052 | 0.301302703    | 0.999898485 NA |

|              |             |              |             |              |                |
|--------------|-------------|--------------|-------------|--------------|----------------|
| ASV_its_988  | 0.023799558 | 0.239968564  | 3.551528285 | 0.049730767  | 0.999999796 NA |
| ASV_its_989  | 0.046919746 | 0.318763332  | 3.551863216 | 0.27012916   | 0.999929894 NA |
| ASV_its_990  | 0.046919746 | 0.318763332  | 3.551863216 | 0.27012916   | 0.999929894 NA |
| ASV_its_991  | 0.045994835 | 0.318937884  | 3.551877674 | 0.26577575   | 0.999933658 NA |
| ASV_its_992  | 0.045866614 | 0.338987998  | 3.551899132 | 0.319384121  | 0.999876382 NA |
| ASV_its_993  | 0.028478864 | 0.588707412  | 3.551379749 | 0.052324388  | 0.999999756 NA |
| ASV_its_994  | 0.016996546 | 0.561659496  | 3.551664134 | -7.17E-05    | 1 NA           |
| ASV_its_995  | 0.048122742 | 0.665847714  | 3.551790757 | 0.249077486  | 0.999946794 NA |
| ASV_its_996  | 0.048122742 | 0.665847714  | 3.551790757 | 0.249077486  | 0.999946794 NA |
| ASV_its_997  | 0.062562124 | 0.667531111  | 3.551643934 | 0.332207435  | 0.999858822 NA |
| ASV_its_998  | 0.062562124 | 0.667531111  | 3.551643934 | 0.332207435  | 0.999858822 NA |
| ASV_its_999  | 0.062562124 | 0.667531111  | 3.551643934 | 0.332207435  | 0.999858822 NA |
| ASV_its_1000 | 0.072197595 | 0.721177202  | 3.551805296 | 0.247449229  | 0.999947969 NA |
| ASV_its_1001 | 0.039046864 | -0.119359959 | 3.551866001 | 0.17876129   | 0.999982877 NA |
| ASV_its_1002 | 0.066575594 | 0.657137937  | 3.551748102 | 0.385701925  | 0.99976679 NA  |
| ASV_its_1003 | 0.041889489 | 0.681347977  | 3.551962039 | 0.127017357  | 0.999994717 NA |
| ASV_its_1004 | 0.021208886 | 0.619247974  | 3.551920142 | 0.085319236  | 0.999998666 NA |
| ASV_its_1005 | 0.021208886 | 0.619247974  | 3.551920142 | 0.085319236  | 0.999998666 NA |
| ASV_its_1006 | 0.010412887 | -0.002026102 | 3.551662644 | -0.016876827 | 1 NA           |
| ASV_its_1007 | 0.027089494 | 0.015064964  | 3.551898569 | 0.181688012  | 0.999981896 NA |
| ASV_its_1008 | 0.027974036 | 0.009697059  | 3.551891591 | 0.184925598  | 0.999980766 NA |
| ASV_its_1009 | 0.024030795 | 0.239621157  | 3.551523559 | 0.034362211  | 0.999999944 NA |
| ASV_its_1010 | 0.024030795 | 0.239621157  | 3.551523559 | 0.034362211  | 0.999999944 NA |
| ASV_its_1011 | 0.010979491 | 0.281620033  | 3.551821908 | -0.019464975 | 1 NA           |
| ASV_its_1012 | 0.038637471 | 0.320082015  | 3.551959545 | 0.220877011  | 0.999964677 NA |
| ASV_its_1013 | 0.038637471 | 0.320082015  | 3.551959545 | 0.220877011  | 0.999964677 NA |
| ASV_its_1014 | 0.035762449 | 0.319944028  | 3.551983782 | 0.20831939   | 0.99997108 NA  |
| ASV_its_1015 | 0.040884298 | 0.319294109  | 3.551935991 | 0.231109516  | 0.999958774 NA |
| ASV_its_1016 | 0.040770323 | 0.337418152  | 3.551915576 | 0.283164842  | 0.999917737 NA |
| ASV_its_1017 | 0.050969706 | 0.595084718  | 3.551090179 | 0.108902058  | 0.999996895 NA |
| ASV_its_1018 | 0.045920146 | 0.65986383   | 3.551816201 | 0.229110032  | 0.999959978 NA |
| ASV_its_1019 | 0.045920146 | 0.65986383   | 3.551816201 | 0.229110032  | 0.999959978 NA |
| ASV_its_1020 | 0.036050577 | 0.625272901  | 3.55192601  | 0.191534041  | 0.999978307 NA |
| ASV_its_1021 | 0.045551191 | 0.577632837  | 3.551907202 | 0.279982115  | 0.999920831 NA |
| ASV_its_1022 | 0.04655568  | 0.634629929  | 3.551852016 | 0.252462349  | 0.999944293 NA |
| ASV_its_1023 | 0.04655568  | 0.634629929  | 3.551852016 | 0.252462349  | 0.999944293 NA |
| ASV_its_1024 | 0.04655568  | 0.634629929  | 3.551852016 | 0.252462349  | 0.999944293 NA |
| ASV_its_1025 | 0.037854851 | 0.605998418  | 3.551928648 | 0.217846556  | 0.999966305 NA |
| ASV_its_1026 | 0.055610777 | 0.656543572  | 3.551733367 | 0.292039689  | 0.999908668 NA |
| ASV_its_1027 | 0.040713858 | 0.692466968  | 3.551989252 | 0.155826631  | 0.999989316 NA |
| ASV_its_1028 | 0.045959357 | 0.335458967  | 3.551957954 | 0.136592217  | 0.999993213 NA |
| ASV_its_1029 | 0.006273921 | 0.080463138  | 3.551812315 | -0.031392004 | 1 NA           |
| ASV_its_1030 | 0.043254208 | 0.312385008  | 3.551988626 | 0.171790172  | 0.999985062 NA |
| ASV_its_1031 | 0.080070666 | 0.624463078  | 3.551903875 | 0.26061217   | 0.999937937 NA |
| ASV_its_1032 | 0.080070666 | 0.624463078  | 3.551903875 | 0.26061217   | 0.999937937 NA |
| ASV_its_1033 | 0.045464524 | 0.643679874  | 3.5520029   | 0.162199922  | 0.999987738 NA |
| ASV_its_1034 | 0.043646575 | 0.322622502  | 3.552030359 | 0.172509088  | 0.999984847 NA |
| ASV_its_1035 | 0.018557775 | 0.592554227  | 3.551936005 | 0.074825218  | 0.999999154 NA |
| ASV_its_1036 | 0.05021994  | -0.006740527 | 3.551858065 | 0.127849445  | 0.999994597 NA |
| ASV_its_1037 | 0.009696708 | 0.009813558  | 3.551684445 | -0.020379814 | 1 NA           |
| ASV_its_1038 | 0.033122995 | -0.01602225  | 3.551816424 | 0.191993086  | 0.999978128 NA |
| ASV_its_1039 | 0.024477282 | 0.031961749  | 3.551921292 | 0.156832696  | 0.999989077 NA |
| ASV_its_1040 | 0.024477282 | 0.031961749  | 3.551921292 | 0.156832696  | 0.999989077 NA |
| ASV_its_1041 | 0.031867147 | -0.010057737 | 3.551838286 | 0.186353875  | 0.999980252 NA |
| ASV_its_1042 | 0.009607054 | 0.289887804  | 3.55186163  | -0.024546087 | 1 NA           |
| ASV_its_1043 | 0.012701434 | 0.273511735  | 3.551770419 | -0.011959968 | 1 NA           |
| ASV_its_1044 | 0.035887352 | 0.319948588  | 3.551983116 | 0.196558407  | 0.999976295 NA |
| ASV_its_1045 | 0.035887352 | 0.319948588  | 3.551983116 | 0.196558407  | 0.999976295 NA |
| ASV_its_1046 | 0.035674033 | 0.335680728  | 3.551934973 | 0.24627303   | 0.999948806 NA |
| ASV_its_1047 | 0.056986902 | 0.658971589  | 3.551819818 | 0.26447884   | 0.999934751 NA |
| ASV_its_1048 | 0.0374288   | 0.630331298  | 3.551912796 | 0.183523776  | 0.999981261 NA |
| ASV_its_1049 | 0.0374288   | 0.630331298  | 3.551912796 | 0.183523776  | 0.999981261 NA |
| ASV_its_1050 | 0.04073622  | 0.615874036  | 3.551903006 | 0.216684092  | 0.999966915 NA |
| ASV_its_1051 | 0.04073622  | 0.615874036  | 3.551903006 | 0.216684092  | 0.999966915 NA |
| ASV_its_1052 | 0.04073622  | 0.615874036  | 3.551903006 | 0.216684092  | 0.999966915 NA |
| ASV_its_1053 | 0.04865943  | 0.640164357  | 3.551823157 | 0.250946908  | 0.999945423 NA |
| ASV_its_1054 | 0.041501969 | 0.33321142   | 3.551974339 | 0.116108845  | 0.999996126 NA |

|              |             |              |             |              |             |    |
|--------------|-------------|--------------|-------------|--------------|-------------|----|
| ASV_its_1055 | 0.054118123 | -0.009233616 | 3.55196282  | 0.204619759  | 0.999972799 | NA |
| ASV_its_1056 | 0.055062042 | 0.313172704  | 3.551990856 | 0.199315248  | 0.999975137 | NA |
| ASV_its_1057 | 0.044853963 | 0.588012567  | 3.551969716 | 0.152935097  | 0.999989983 | NA |
| ASV_its_1058 | 0.007322983 | 0.311134445  | 3.551985192 | 0.058886321  | 0.999999632 | NA |
| ASV_its_1059 | 0.00740809  | 0.178394705  | 3.551961038 | 0.062211307  | 0.999999555 | NA |
| ASV_its_1060 | 0.043045663 | 0.042273578  | 3.551907959 | 0.1002208    | 0.999997671 | NA |
| ASV_its_1061 | 0.031275099 | 0.613167817  | 3.551923685 | 0.078231045  | 0.999999013 | NA |
| ASV_its_1062 | 0.008311464 | 0.035641336  | 3.551728357 | -0.02618784  | 1           | NA |
| ASV_its_1063 | 0.028391138 | 0.028330491  | 3.55191631  | 0.1572167    | 0.999988985 | NA |
| ASV_its_1064 | 0.020980527 | 0.056086237  | 3.551947348 | 0.129032606  | 0.999994423 | NA |
| ASV_its_1065 | 0.026805593 | 0.095793663  | 3.55188779  | 0.197784914  | 0.999975785 | NA |
| ASV_its_1066 | 0.030711906 | 0.321894316  | 3.552027052 | 0.161045446  | 0.999988035 | NA |
| ASV_its_1067 | 0.030663223 | 0.321894075  | 3.552027051 | 0.160848269  | 0.999988085 | NA |
| ASV_its_1068 | 0.030577742 | 0.334997331  | 3.551949652 | 0.208819429  | 0.999970842 | NA |
| ASV_its_1069 | 0.03822728  | 0.553093639  | 3.551733091 | -0.020921229 | 1           | NA |
| ASV_its_1070 | 0.018985909 | 0.553093703  | 3.551733091 | -0.006322631 | 1           | NA |
| ASV_its_1071 | 0.011331031 | 0.539505166  | 3.551825869 | -0.022454162 | 1           | NA |
| ASV_its_1072 | 0.011331031 | 0.539505166  | 3.551825869 | -0.022454162 | 1           | NA |
| ASV_its_1073 | 0.017344422 | 0.553093709  | 3.551733091 | -0.005059647 | 1           | NA |
| ASV_its_1074 | 0.027037932 | 0.582312689  | 3.551990779 | 0.133563539  | 0.999993718 | NA |
| ASV_its_1075 | 0.027512163 | 0.584977968  | 3.551988265 | 0.135042125  | 0.999993474 | NA |
| ASV_its_1076 | 0.032081828 | 0.602383806  | 3.551972356 | 0.150652665  | 0.999990488 | NA |
| ASV_its_1077 | 0.032081828 | 0.602383806  | 3.551972356 | 0.150652665  | 0.999990488 | NA |
| ASV_its_1078 | 0.035907504 | 0.59850135   | 3.551948784 | 0.184547933  | 0.9999809   | NA |
| ASV_its_1079 | 0.019713379 | 0.604061446  | 3.551929068 | 0.060675695  | 0.999999592 | NA |
| ASV_its_1080 | 0.004705441 | 0.12178874   | 3.551878081 | -0.031583937 | 1           | NA |
| ASV_its_1081 | 0.048132908 | 0.542581217  | 3.551977514 | 0.15192394   | 0.999990209 | NA |
| ASV_its_1082 | 0.036708837 | 0.313959946  | 3.551993321 | 0.136265108  | 0.999993268 | NA |
| ASV_its_1083 | 0.030895863 | 0.313959946  | 3.551993321 | 0.119934828  | 0.999995667 | NA |
| ASV_its_1084 | 0.0451659   | 0.068622936  | 3.551930271 | 0.164786997  | 0.999987052 | NA |
| ASV_its_1085 | 0.006531089 | 0.19179778   | 3.55196517  | 0.057485568  | 0.999999662 | NA |
| ASV_its_1086 | 0.038823428 | 0.321202348  | 3.552023944 | 0.14054809   | 0.999992511 | NA |
| ASV_its_1087 | 0.031176125 | 0.321202348  | 3.552023944 | 0.120123968  | 0.999995643 | NA |
| ASV_its_1088 | 0.047895533 | 0.084669754  | 3.551978414 | 0.161845342  | 0.999987829 | NA |
| ASV_its_1089 | 0.011872425 | 0.096007007  | 3.551947114 | 0.050974892  | 0.999999777 | NA |
| ASV_its_1090 | 0.014418788 | 0.089018759  | 3.551943516 | 0.05182276   | 0.999999764 | NA |
| ASV_its_1091 | 0.006213909 | 0.082509491  | 3.551816329 | -0.031452405 | 1           | NA |
| ASV_its_1092 | 0.0039212   | 0.14479732   | 3.551906834 | -0.029731738 | 1           | NA |
| ASV_its_1093 | 0.017483773 | 0.084107287  | 3.551974899 | 0.101940256  | 0.99999753  | NA |
| ASV_its_1094 | 0.022762248 | 0.084107287  | 3.551974899 | 0.120239427  | 0.999995628 | NA |
| ASV_its_1095 | 0.022762248 | 0.084107287  | 3.551974899 | 0.120239427  | 0.999995628 | NA |
| ASV_its_1096 | 0.013221976 | 0.297188846  | 3.551897937 | -0.022200012 | 1           | NA |
| ASV_its_1097 | 0.013221976 | 0.297188846  | 3.551897937 | -0.022200012 | 1           | NA |
| ASV_its_1098 | 0.009072453 | 0.297188888  | 3.551897937 | -0.024604961 | 1           | NA |
| ASV_its_1099 | 0.009072453 | 0.297188888  | 3.551897937 | -0.024604961 | 1           | NA |
| ASV_its_1100 | 0.024148419 | 0.32120235   | 3.552023944 | 0.121490529  | 0.999995469 | NA |
| ASV_its_1101 | 0.025633823 | 0.32120235   | 3.552023944 | 0.126779318  | 0.999994751 | NA |
| ASV_its_1102 | 0.025633823 | 0.32120235   | 3.552023944 | 0.126779318  | 0.999994751 | NA |
| ASV_its_1103 | 0.02235153  | 0.32120235   | 3.552023944 | 0.115077355  | 0.999996243 | NA |
| ASV_its_1104 | 0.02235153  | 0.32120235   | 3.552023944 | 0.115077355  | 0.999996243 | NA |
| ASV_its_1105 | 0.025481452 | 0.334151312  | 3.551961327 | 0.171147759  | 0.999985253 | NA |
| ASV_its_1106 | 0.02537026  | 0.32120235   | 3.552023944 | 0.145619072  | 0.999991538 | NA |
| ASV_its_1107 | 0.031856066 | 0.526742991  | 3.551888786 | -0.070110717 | 1           | NA |
| ASV_its_1108 | 0.009442526 | 0.526744012  | 3.551888789 | -0.02691113  | 1           | NA |
| ASV_its_1109 | 0.012412013 | 0.5267444    | 3.551888789 | -0.016430794 | 1           | NA |
| ASV_its_1110 | 0.04070493  | 0.549890972  | 3.552007564 | 0.162181039  | 0.999987742 | NA |
| ASV_its_1111 | 0.04070493  | 0.549890972  | 3.552007564 | 0.162181039  | 0.999987742 | NA |
| ASV_its_1112 | 0.026734857 | 0.549890972  | 3.552007564 | 0.118863414  | 0.999995799 | NA |
| ASV_its_1113 | 0.026734857 | 0.549890972  | 3.552007564 | 0.118863414  | 0.999995799 | NA |
| ASV_its_1114 | 0.02992292  | 0.551378447  | 3.551998601 | 0.148958855  | 0.999990851 | NA |
| ASV_its_1115 | 0.034756736 | 0.551378447  | 3.551998601 | 0.167274009  | 0.999986368 | NA |
| ASV_its_1116 | 0.023225315 | 0.321202348  | 3.552023944 | 0.098633387  | 0.999997796 | NA |
| ASV_its_1117 | 0.039559109 | 0.321202348  | 3.552023944 | 0.142500355  | 0.999992146 | NA |
| ASV_its_1118 | 0.016427816 | 0.561439403  | 3.551948641 | 0.049155878  | 0.999999804 | NA |
| ASV_its_1119 | 0.027666418 | 0.314710824  | 3.551995894 | 0.103680675  | 0.999997381 | NA |
| ASV_its_1120 | 0.027683117 | 0.125471675  | 3.551962352 | 0.105246527  | 0.999997241 | NA |
| ASV_its_1121 | 0.022263559 | 0.125471675  | 3.551962352 | 0.092004609  | 0.999998268 | NA |

|              |             |             |             |              |                |
|--------------|-------------|-------------|-------------|--------------|----------------|
| ASV_its_1122 | 0.020206176 | 0.489951811 | 3.551965674 | 0.072763057  | 0.999999232 NA |
| ASV_its_1123 | 0.051652353 | 0.307414917 | 3.551973691 | 0.17471429   | 0.999984171 NA |
| ASV_its_1124 | 0.008080085 | 0.31059511  | 3.551983447 | 0.062486028  | 0.999999548 NA |
| ASV_its_1125 | 0.045754666 | 0.489951811 | 3.551965674 | 0.136051929  | 0.999993305 NA |
| ASV_its_1126 | 0.028265337 | 0.32467266  | 3.551997913 | 0.060654023  | 0.999999592 NA |
| ASV_its_1127 | 0.005206443 | 0.108872895 | 3.551862033 | -0.031901075 | 1 NA           |
| ASV_its_1128 | 0.005540976 | 0.107464193 | 3.551859736 | -0.030725561 | 1 NA           |
| ASV_its_1129 | 0.013987018 | 0.131258706 | 3.551984143 | 0.078279735  | 0.999999011 NA |
| ASV_its_1130 | 0.017870395 | 0.143060872 | 3.551930087 | 0.127353171  | 0.999994669 NA |
| ASV_its_1131 | 0.025484853 | 0.489954174 | 3.551939888 | -0.095413622 | 1 NA           |
| ASV_its_1132 | 0.032563944 | 0.502996683 | 3.55201016  | 0.118171622  | 0.999995883 NA |
| ASV_its_1133 | 0.037433425 | 0.516285963 | 3.551949417 | 0.198222412  | 0.999975601 NA |
| ASV_its_1134 | 0.02327784  | 0.502996683 | 3.55201016  | 0.112616454  | 0.999996514 NA |
| ASV_its_1135 | 0.02327784  | 0.502996683 | 3.55201016  | 0.112616454  | 0.999996514 NA |
| ASV_its_1136 | 0.02327784  | 0.502996683 | 3.55201016  | 0.112616454  | 0.999996514 NA |
| ASV_its_1137 | 0.023938336 | 0.502996683 | 3.55201016  | 0.114836096  | 0.99999627 NA  |
| ASV_its_1138 | 0.023938336 | 0.502996683 | 3.55201016  | 0.114836096  | 0.99999627 NA  |
| ASV_its_1139 | 0.027755075 | 0.502996683 | 3.55201016  | 0.127616317  | 0.999994631 NA |
| ASV_its_1140 | 0.018091422 | 0.502996595 | 3.55201016  | 0.073568299  | 0.999999202 NA |
| ASV_its_1141 | 0.020419201 | 0.131258706 | 3.551984143 | 0.116246806  | 0.99999611 NA  |
| ASV_its_1142 | 0.028879745 | 0.451717919 | 3.551994239 | 0.090025839  | 0.99998394 NA  |
| ASV_its_1143 | 0.012238865 | 0.315436847 | 3.55199862  | 0.059466851  | 0.999999619 NA |
| ASV_its_1144 | 0.016697669 | 0.173508651 | 3.551972792 | 0.071363557  | 0.999999282 NA |
| ASV_its_1145 | 0.032156482 | 0.446360663 | 3.551978913 | 0.096323606  | 0.99999797 NA  |
| ASV_its_1146 | 0.020820253 | 0.31008252  | 3.551981813 | 0.078867593  | 0.999998985 NA |
| ASV_its_1147 | 0.020073941 | 0.168324008 | 3.551957993 | 0.077853171  | 0.999999029 NA |
| ASV_its_1148 | 0.026809153 | 0.168324008 | 3.551957993 | 0.094272438  | 0.999998116 NA |
| ASV_its_1149 | 0.031200745 | 0.446360663 | 3.551978913 | 0.094233374  | 0.999998118 NA |
| ASV_its_1150 | 0.013568567 | 0.456102493 | 3.552012936 | 0.059292447  | 0.999999623 NA |
| ASV_its_1151 | 0.022134844 | 0.456102493 | 3.552012936 | 0.075882833  | 0.999999112 NA |
| ASV_its_1152 | 0.018705675 | 0.319772484 | 3.552017638 | 0.074092452  | 0.999999183 NA |
| ASV_its_1153 | 0.019148958 | 0.177847424 | 3.551989999 | 0.074993125  | 0.999999148 NA |
| ASV_its_1154 | 0.021860179 | 0.460618927 | 3.551988751 | 0.042190776  | 0.999999885 NA |
| ASV_its_1155 | 0.00235272  | 0.198050369 | 3.55195486  | -0.019907291 | 1 NA           |
| ASV_its_1156 | 0.01015856  | 0.177847425 | 3.551989999 | 0.056834381  | 0.999999675 NA |
| ASV_its_1157 | 0.014195569 | 0.177847425 | 3.551989999 | 0.064952907  | 0.999999483 NA |
| ASV_its_1158 | 0.009011548 | 0.313633559 | 3.55198174  | -0.044750934 | 1 NA           |
| ASV_its_1159 | 0.008993553 | 0.31363356  | 3.55198174  | -0.044606341 | 1 NA           |
| ASV_its_1160 | 0.004117309 | 0.313633626 | 3.55198174  | -0.024822634 | 1 NA           |
| ASV_its_1161 | 0.004117309 | 0.313633626 | 3.55198174  | -0.024822634 | 1 NA           |
| ASV_its_1162 | 0.014489051 | 0.319772485 | 3.552017638 | 0.064578118  | 0.999999493 NA |
| ASV_its_1163 | 0.014489051 | 0.319772485 | 3.552017638 | 0.064578118  | 0.999999493 NA |
| ASV_its_1164 | 0.015639915 | 0.319772485 | 3.552017638 | 0.067125485  | 0.99999942 NA  |
| ASV_its_1165 | 0.013410918 | 0.319772485 | 3.552017638 | 0.062184109  | 0.999999555 NA |
| ASV_its_1166 | 0.01911364  | 0.449821894 | 3.551977065 | -0.103271851 | 1 NA           |
| ASV_its_1167 | 0.009492955 | 0.449822343 | 3.551977065 | -0.037717068 | 1 NA           |
| ASV_its_1168 | 0.009492955 | 0.449822343 | 3.551977065 | -0.037717068 | 1 NA           |
| ASV_its_1169 | 0.005665515 | 0.449822552 | 3.551977066 | -0.022666165 | 1 NA           |
| ASV_its_1170 | 0.008672211 | 0.4498224   | 3.551977065 | -0.032007936 | 1 NA           |
| ASV_its_1171 | 0.013518966 | 0.456102559 | 3.552012935 | 0.058979809  | 0.999999963 NA |
| ASV_its_1172 | 0.013756082 | 0.456102559 | 3.552012935 | 0.059443532  | 0.999999962 NA |
| ASV_its_1173 | 0.024422958 | 0.456102559 | 3.552012935 | 0.080025187  | 0.999998932 NA |
| ASV_its_1174 | 0.016040914 | 0.456102559 | 3.552012935 | 0.063897958  | 0.999999511 NA |
| ASV_its_1175 | 0.016040914 | 0.456102559 | 3.552012935 | 0.063897958  | 0.999999511 NA |
| ASV_its_1176 | 0.01745838  | 0.456102559 | 3.552012935 | 0.082630437  | 0.999998807 NA |
| ASV_its_1177 | 0.01745838  | 0.456102559 | 3.552012935 | 0.082630437  | 0.999998807 NA |
| ASV_its_1178 | 0.017953752 | 0.456102559 | 3.552012935 | 0.084034199  | 0.999998735 NA |
| ASV_its_1179 | 0.023193481 | 0.177847424 | 3.551989999 | 0.082916527  | 0.999998792 NA |
| ASV_its_1180 | 0.015972327 | 0.406565517 | 3.55200144  | 0.058872378  | 0.999999632 NA |
| ASV_its_1181 | 0.002612435 | 0.26045297  | 3.551987707 | 0.038243605  | 0.999999918 NA |
| ASV_its_1182 | 0.005302221 | 0.412463956 | 3.551997335 | 0.029906754  | 0.999999965 NA |
| ASV_its_1183 | 0.013382627 | 0.320709141 | 3.552005029 | 0.031727951  | 0.999999957 NA |
| ASV_its_1184 | 0.002309077 | 0.22125217  | 3.551977116 | -0.013527502 | 1 NA           |
| ASV_its_1185 | 0.002770488 | 0.221252163 | 3.551977116 | -0.013960845 | 1 NA           |
| ASV_its_1186 | 0.002770488 | 0.221252163 | 3.551977116 | -0.013960845 | 1 NA           |
| ASV_its_1187 | 0.005288791 | 0.317508046 | 3.552005031 | -0.028842356 | 1 NA           |
| ASV_its_1188 | 0.002744873 | 0.317508049 | 3.552005031 | -0.013537192 | 1 NA           |



|              |             |             |             |              |                |
|--------------|-------------|-------------|-------------|--------------|----------------|
| ASV_its_1189 | 0.003628981 | 0.317508047 | 3.552005031 | -0.014666162 | 1 NA           |
| ASV_its_1190 | 0.010192581 | 0.32378677  | 3.551987908 | 0.071924104  | 0.999999263 NA |
| ASV_its_1191 | 0.012742427 | 0.407894305 | 3.55200467  | -0.089110312 | 1 NA           |
| ASV_its_1192 | 0.006328636 | 0.407894309 | 3.55200467  | -0.030111831 | 1 NA           |
| ASV_its_1193 | 0.006328636 | 0.407894309 | 3.55200467  | -0.030111831 | 1 NA           |
| ASV_its_1194 | 0.009170721 | 0.40947167  | 3.552014244 | 0.042072637  | 0.999999886 NA |
| ASV_its_1195 | 0.016281972 | 0.40947167  | 3.552014244 | 0.050190045  | 0.999999789 NA |
| ASV_its_1196 | 0.01163892  | 0.40947167  | 3.552014244 | 0.057316957  | 0.999999665 NA |
| ASV_its_1197 | 0.012519329 | 0.415842514 | 3.551979564 | 0.075169512  | 0.999999141 NA |

**Table S8: Taxa enriched/depleted in the clusters defined based on LRT test.** Columns report the number of ASVs found in the group of interest and in the whole community as used in the hypergeometric test. In details: Amplicon, the amplified amplicon used for barcoding (16S stands for 16S rRNA gene V3-V4 regions and ITS stands for the ITS1 region); Level, taxonomic level considered; Taxon, the name of the taxon tested; Cluster, the cluster in which the enrichment/depletion was tested; x, the number of ASVs assigned to the taxon considered in the cluster of interest; k, the number of ASVs in the cluster considered; n, the number of ASVs outside the cluster; m, the number of ASVs assigned to the given taxon in the whole community; p\_obs, the probability of having an ASVs assigned to the taxon of interest in the cluster; p\_exp, the probability of having an ASVs assigned to the taxon of interest in the community; log2.fold.enrichment,  $\log_2$  of the ratio between p\_obs and p\_exp; p.value, the p value; adj.p.value, p value adjusted following the Benjamini–Hochberg method.

| Amplicon | Level  | Taxon                             | Cluster | x  | k   | n     | m     | p_obs       | p_exp       | log2.fold.enrichment |
|----------|--------|-----------------------------------|---------|----|-----|-------|-------|-------------|-------------|----------------------|
| ITS      | domain | Fungi                             | 3       | 8  | 50  | 54622 | 1197  | 0.16        | 0.021444311 | 2.899405032          |
| ITS      | domain | Fungi                             | 4       | 22 | 22  | 54622 | 1197  | 1           | 0.021444311 | 5.543261221          |
| 16S      | phylum | Bacteroidota                      | 1       | 23 | 106 | 50209 | 5610  | 0.216981132 | 0.100503413 | 1.110325104          |
| 16S      | phylum | Firmicutes                        | 1       | 30 | 106 | 52663 | 3156  | 0.283018868 | 0.056539888 | 2.323557309          |
| 16S      | phylum | Actinobacteriota                  | 2       | 11 | 44  | 50245 | 5574  | 0.25        | 0.099858471 | 1.323971371          |
| 16S      | phylum | Bacteroidota                      | 2       | 10 | 44  | 50209 | 5610  | 0.227272727 | 0.100503413 | 1.177180079          |
| 16S      | phylum | Patescibacteria                   | 2       | 8  | 44  | 53423 | 2396  | 0.181818182 | 0.042924452 | 2.082624847          |
| ITS      | phylum | Ascomycota                        | 3       | 7  | 50  | 54977 | 842   | 0.14        | 0.015084469 | 3.214290967          |
| 16S      | phylum | Campilobacterota                  | 3       | 5  | 50  | 55429 | 390   | 0.1         | 0.006986868 | 3.83921025           |
| 16S      | phylum | Proteobacteria                    | 3       | 29 | 50  | 39791 | 16028 | 0.58        | 0.287142371 | 1.014286669          |
| ITS      | phylum | Ascomycota                        | 4       | 21 | 22  | 54977 | 842   | 0.954545455 | 0.015084469 | 5.983678039          |
| 16S      | class  | Bacilli                           | 1       | 27 | 106 | 54432 | 1387  | 0.254716981 | 0.02484817  | 3.357683634          |
| 16S      | class  | Bacteroidia                       | 1       | 23 | 106 | 50797 | 5022  | 0.216981132 | 0.089969365 | 1.270063846          |
| 16S      | class  | Actinobacteria                    | 2       | 8  | 44  | 53042 | 2777  | 0.181818182 | 0.049750085 | 1.869725578          |
| 16S      | class  | Bacteroidia                       | 2       | 10 | 44  | 50797 | 5022  | 0.227272727 | 0.089969365 | 1.336918821          |
| 16S      | class  | Gracilibacteria                   | 2       | 2  | 44  | 55547 | 272   | 0.045454545 | 0.004872893 | 3.221574198          |
| 16S      | class  | Saccharimonadia                   | 2       | 5  | 44  | 54806 | 1013  | 0.113636364 | 0.018147942 | 2.646546676          |
| 16S      | class  | Campylobacteria                   | 3       | 5  | 50  | 55429 | 390   | 0.1         | 0.006986868 | 3.83921025           |
| ITS      | class  | Dothideomycetes                   | 3       | 3  | 50  | 55600 | 219   | 0.06        | 0.003923395 | 3.93478791           |
| 16S      | class  | Gammaproteobacteria               | 3       | 17 | 50  | 46753 | 9066  | 0.34        | 0.162417815 | 1.065824864          |
| ITS      | class  | Sordariomycetes                   | 3       | 4  | 50  | 55370 | 449   | 0.08        | 0.008043856 | 3.314040834          |
| ITS      | class  | Ustilaginomycotina_Incertae sedis | 3       | 1  | 50  | 55791 | 28    | 0.02        | 5.02E-04    | 5.317257546          |
| ITS      | class  | Dothideomycetes                   | 4       | 9  | 22  | 55600 | 219   | 0.409090909 | 0.003923395 | 6.704174981          |
| ITS      | class  | Eurotiomycetes                    | 4       | 2  | 22  | 55711 | 108   | 0.090909091 | 0.001934825 | 5.554149537          |
| ITS      | class  | Pezizomycotina_Incertae sedis     | 4       | 2  | 22  | 55807 | 12    | 0.090909091 | 2.15E-04    | 8.724074539          |
| ITS      | class  | Sordariomycetes                   | 4       | 8  | 22  | 55370 | 449   | 0.363636364 | 0.008043856 | 5.498465405          |
| ITS      | class  | Tremellomycetes                   | 4       | 1  | 22  | 55742 | 77    | 0.045454545 | 0.001379459 | 5.042250499          |
| 16S      | order  | Alteromonadales                   | 1       | 3  | 106 | 55635 | 184   | 0.028301887 | 0.003296369 | 3.101948748          |
| 16S      | order  | Chitinophagales                   | 1       | 8  | 106 | 54547 | 1272  | 0.075471698 | 0.02278794  | 1.727665248          |
| 16S      | order  | Enterobacteriales                 | 1       | 5  | 106 | 55470 | 349   | 0.047169811 | 0.006252351 | 2.915393072          |
| 16S      | order  | Entomoplasmatales                 | 1       | 8  | 106 | 55737 | 82    | 0.075471698 | 0.001469034 | 5.682996199          |
| 16S      | order  | Flavobacteriales                  | 1       | 8  | 106 | 54724 | 1095  | 0.075471698 | 0.019616976 | 1.943833049          |
| 16S      | order  | Lactobacillales                   | 1       | 4  | 106 | 55632 | 187   | 0.037735849 | 0.003350114 | 3.493653744          |
| 16S      | order  | Microtrichales                    | 1       | 4  | 106 | 55302 | 517   | 0.037735849 | 0.009262079 | 2.026527733          |
| 16S      | order  | Mycoplasmatales                   | 1       | 13 | 106 | 55640 | 179   | 0.122641509 | 0.003206793 | 5.257172145          |
| 16S      | order  | Pseudomonadales                   | 1       | 6  | 106 | 55434 | 385   | 0.056603774 | 0.006897293 | 3.036796069          |
| 16S      | order  | Rhodobacterales                   | 1       | 11 | 106 | 54857 | 962   | 0.103773585 | 0.017234275 | 2.590086739          |
| 16S      | order  | Absconditabacteriales (SR1)       | 2       | 2  | 44  | 55723 | 96    | 0.045454545 | 0.001719844 | 4.724074539          |
| 16S      | order  | Flavobacteriales                  | 2       | 7  | 44  | 54724 | 1095  | 0.159090909 | 0.019616976 | 3.019676807          |
| 16S      | order  | Micrococcales                     | 2       | 5  | 44  | 55187 | 632   | 0.113636364 | 0.01132231  | 3.327184386          |
| 16S      | order  | Microtrichales                    | 2       | 3  | 44  | 55302 | 517   | 0.068181818 | 0.009262079 | 2.87997907           |
| 16S      | order  | Propionibacteriales               | 2       | 3  | 44  | 55094 | 725   | 0.068181818 | 0.012988409 | 2.392162355          |
| 16S      | order  | Rhodobacterales                   | 2       | 4  | 44  | 54857 | 962   | 0.090909091 | 0.017234275 | 2.399143956          |
| 16S      | order  | Saccharimonadales                 | 2       | 5  | 44  | 54806 | 1013  | 0.113636364 | 0.018147942 | 2.646546676          |

|     |        |                                  |   |    |    |       |      |             |             |             |
|-----|--------|----------------------------------|---|----|----|-------|------|-------------|-------------|-------------|
| 16S | order  | Burkholderiales                  | 3 | 15 | 50 | 50393 | 5426 | 0.3         | 0.097207044 | 1.625829732 |
| 16S | order  | Campylobacteriales               | 3 | 5  | 50 | 55429 | 390  | 0.1         | 0.006986868 | 3.83921025  |
| ITS | order  | Hypocreales                      | 3 | 3  | 50 | 55576 | 243  | 0.06        | 0.004353356 | 3.784762466 |
| ITS | order  | Pleosporales                     | 3 | 2  | 50 | 55730 | 89   | 0.04        | 0.001594439 | 4.648879037 |
| 16S | order  | Rhizobiales                      | 3 | 7  | 50 | 52980 | 2839 | 0.14        | 0.050860818 | 1.460800257 |
| ITS | order  | Botryosphaeriales                | 4 | 1  | 22 | 55808 | 11   | 0.045454545 | 1.97E-04    | 7.849605421 |
| ITS | order  | Capnodiales                      | 4 | 5  | 22 | 55714 | 105  | 0.227272727 | 0.00188108  | 6.916719617 |
| ITS | order  | Dothideales                      | 4 | 1  | 22 | 55809 | 10   | 0.045454545 | 1.79E-04    | 7.987108945 |
| ITS | order  | Eurotiales                       | 4 | 2  | 22 | 55730 | 89   | 0.090909091 | 0.001594439 | 5.833303609 |
| ITS | order  | Pezizomycotina_Incertae sedis    | 4 | 2  | 22 | 55807 | 12   | 0.090909091 | 2.15E-04    | 8.724074539 |
| ITS | order  | Pleosporales                     | 4 | 2  | 22 | 55730 | 89   | 0.090909091 | 0.001594439 | 5.833303609 |
| ITS | order  | Sordariomycetidae_Incertae sedis | 4 | 6  | 22 | 55768 | 51   | 0.272727273 | 9.14E-04    | 8.221574198 |
| ITS | order  | Tremellales                      | 4 | 1  | 22 | 55758 | 61   | 0.045454545 | 0.001092818 | 5.378299702 |
| ITS | order  | Xylariales                       | 4 | 1  | 22 | 55782 | 37   | 0.045454545 | 6.63E-04    | 6.099583674 |
| 16S | family | Beutenbergiaceae                 | 1 | 1  | 99 | 55814 | 5    | 0.01010101  | 8.96E-05    | 6.817183943 |
| 16S | family | Chitinophagaceae                 | 1 | 7  | 99 | 54710 | 1109 | 0.070707071 | 0.019867787 | 1.83142331  |
| 16S | family | Entomoplasmatales Incertae sedis | 1 | 7  | 99 | 55771 | 48   | 0.070707071 | 8.60E-04    | 6.361504459 |
| 16S | family | Erwiniaceae                      | 1 | 2  | 99 | 55790 | 29   | 0.02020202  | 5.20E-04    | 5.281131043 |
| 16S | family | Flavobacteriaceae                | 1 | 5  | 99 | 55127 | 692  | 0.050505051 | 0.012397212 | 2.026411905 |
| 16S | family | Ilumatobacteraceae               | 1 | 3  | 99 | 55522 | 297  | 0.03030303  | 0.005320769 | 2.509755418 |
| 16S | family | Mitochondria                     | 1 | 2  | 99 | 55741 | 78   | 0.02020202  | 0.001397374 | 3.853709819 |
| 16S | family | Moraxellaceae                    | 1 | 5  | 99 | 55577 | 242  | 0.050505051 | 0.004335441 | 3.542176896 |
| 16S | family | Mycoplasmataceae                 | 1 | 13 | 99 | 55640 | 179  | 0.131313131 | 0.003206793 | 5.355735979 |
| 16S | family | Prolixibacteraceae               | 1 | 3  | 99 | 55673 | 146  | 0.03030303  | 0.002615597 | 3.53424998  |
| 16S | family | Rhodobacteraceae                 | 1 | 11 | 99 | 54857 | 962  | 0.111111111 | 0.017234275 | 2.688650573 |
| 16S | family | Shewanellaceae                   | 1 | 3  | 99 | 55757 | 62   | 0.03030303  | 0.001110733 | 4.769878228 |
| 16S | family | Streptococcaceae                 | 1 | 4  | 99 | 55745 | 74   | 0.04040404  | 0.001325713 | 4.929658673 |
| 16S | family | Weeksellaceae                    | 1 | 3  | 99 | 55592 | 227  | 0.03030303  | 0.004066716 | 2.897526052 |
| 16S | family | Crocinitomicaceae                | 2 | 2  | 36 | 55745 | 74   | 0.055555556 | 0.001325713 | 5.389090291 |
| ITS | family | Didymellaceae                    | 2 | 1  | 36 | 55796 | 23   | 0.027777778 | 4.12E-04    | 6.074981701 |
| 16S | family | Ilumatobacteraceae               | 2 | 3  | 36 | 55522 | 297  | 0.083333333 | 0.005320769 | 3.969187037 |
| 16S | family | Microbacteriaceae                | 2 | 4  | 36 | 55564 | 255  | 0.111111111 | 0.004568337 | 4.60419022  |
| 16S | family | Propionibacteriaceae             | 2 | 2  | 36 | 55726 | 93   | 0.055555556 | 0.001666099 | 5.059384846 |
| 16S | family | Rhodobacteraceae                 | 2 | 4  | 36 | 54857 | 962  | 0.111111111 | 0.017234275 | 2.688650573 |
| 16S | family | Saccharimonadaceae               | 2 | 5  | 36 | 55491 | 328  | 0.138888889 | 0.005876135 | 4.562919747 |
| 16S | family | Weeksellaceae                    | 2 | 3  | 36 | 55592 | 227  | 0.083333333 | 0.004066716 | 4.35695767  |
| 16S | family | Arcobacteraceae                  | 3 | 5  | 47 | 55696 | 123  | 0.106382979 | 0.002203551 | 5.593293396 |
| 16S | family | Comamonadaceae                   | 3 | 10 | 47 | 54486 | 1333 | 0.212765957 | 0.023880757 | 3.155346836 |
| ITS | family | Cordycipitaceae                  | 3 | 1  | 47 | 55814 | 5    | 0.021276596 | 8.96E-05    | 7.891951712 |
| ITS | family | Nectriaceae                      | 3 | 2  | 47 | 55709 | 110  | 0.042553191 | 0.001970655 | 4.432520093 |
| 16S | family | Xanthobacteraceae                | 3 | 3  | 47 | 55347 | 472  | 0.063829787 | 0.008455902 | 2.916199258 |
| ITS | family | Amphisphaeriaceae                | 4 | 1  | 22 | 55802 | 17   | 0.045454545 | 3.05E-04    | 7.221574198 |
| ITS | family | Botryosphaeriaceae               | 4 | 1  | 22 | 55808 | 11   | 0.045454545 | 1.97E-04    | 7.849605421 |
| ITS | family | Didymellaceae                    | 4 | 2  | 22 | 55796 | 23   | 0.090909091 | 4.12E-04    | 7.785475084 |
| ITS | family | Dothioraceae                     | 4 | 1  | 22 | 55809 | 10   | 0.045454545 | 1.79E-04    | 7.987108945 |

|     |        |                               |   |    |    |       |     |             |             |             |
|-----|--------|-------------------------------|---|----|----|-------|-----|-------------|-------------|-------------|
| ITS | family | Glomerellaceae                | 4 | 5  | 22 | 55792 | 27  | 0.227272727 | 4.84E-04    | 8.876077632 |
| ITS | family | Mycosphaerellaceae            | 4 | 5  | 22 | 55719 | 100 | 0.227272727 | 0.001791505 | 6.987108945 |
| ITS | family | Nectriaceae                   | 4 | 1  | 22 | 55709 | 110 | 0.045454545 | 0.001970655 | 4.527677326 |
| ITS | family | Pezizomycotina_Incertae sedis | 4 | 2  | 22 | 55807 | 12  | 0.090909091 | 2.15E-04    | 8.724074539 |
| ITS | family | Plectosphaerellaceae          | 4 | 1  | 22 | 55798 | 21  | 0.045454545 | 3.76E-04    | 6.916719617 |
| ITS | family | Tremellaceae                  | 4 | 1  | 22 | 55778 | 41  | 0.045454545 | 7.35E-04    | 5.951485035 |
| ITS | family | Trichocomaceae                | 4 | 2  | 22 | 55730 | 89  | 0.090909091 | 0.001594439 | 5.833303609 |
| 16S | genus  | Acinetobacter                 | 1 | 5  | 60 | 55670 | 149 | 0.083333333 | 0.002669342 | 4.964337637 |
| 16S | genus  | Candidatus Bacilloplasma      | 1 | 13 | 60 | 55644 | 175 | 0.216666667 | 0.003135133 | 6.110806669 |
| 16S | genus  | Candidatus Hepatoplasma       | 1 | 7  | 60 | 55771 | 48  | 0.116666667 | 8.60E-04    | 7.083970484 |
| 16S | genus  | Lactococcus                   | 1 | 1  | 60 | 55807 | 12  | 0.016666667 | 2.15E-04    | 6.276615562 |
| 16S | genus  | Lactovum                      | 1 | 3  | 60 | 55791 | 28  | 0.05        | 5.02E-04    | 6.639185641 |
| 16S | genus  | Leadbetterella                | 1 | 1  | 60 | 55809 | 10  | 0.016666667 | 1.79E-04    | 6.539649968 |
| 16S | genus  | Luteolibacter                 | 1 | 3  | 60 | 55539 | 280 | 0.05        | 0.005016213 | 3.317257546 |
| 16S | genus  | Niabella                      | 1 | 2  | 60 | 55804 | 15  | 0.033333333 | 2.69E-04    | 6.954687467 |
| 16S | genus  | Paracoccus                    | 1 | 3  | 60 | 55782 | 37  | 0.05        | 6.63E-04    | 6.237087198 |
| 16S | genus  | Roseimarinus                  | 1 | 3  | 60 | 55780 | 39  | 0.05        | 6.99E-04    | 6.161138344 |
| 16S | genus  | Shewanella                    | 1 | 2  | 60 | 55761 | 58  | 0.033333333 | 0.001039073 | 5.003597067 |
| 16S | genus  | Acinetobacter                 | 2 | 1  | 15 | 55670 | 149 | 0.066666667 | 0.002669342 | 4.642409542 |
| 16S | genus  | Albimonas                     | 2 | 1  | 15 | 55809 | 10  | 0.066666667 | 1.79E-04    | 8.539649968 |
| 16S | genus  | CL500-29 marine group         | 2 | 1  | 15 | 55750 | 69  | 0.066666667 | 0.001236138 | 5.753053606 |
| 16S | genus  | Fluviicola                    | 2 | 2  | 15 | 55779 | 40  | 0.133333333 | 7.17E-04    | 7.539649968 |
| 16S | genus  | Ilumatobacter                 | 2 | 2  | 15 | 55674 | 145 | 0.133333333 | 0.002597682 | 5.681668973 |
| 16S | genus  | Leadbetterella                | 2 | 1  | 15 | 55809 | 10  | 0.066666667 | 1.79E-04    | 8.539649968 |
| ITS | genus  | Leptosphaerulina              | 2 | 1  | 15 | 55816 | 3   | 0.066666667 | 5.37E-05    | 10.27661556 |
| 16S | genus  | Methylotenera                 | 2 | 1  | 15 | 55792 | 27  | 0.066666667 | 4.84E-04    | 7.10669056  |
| 16S | genus  | Moheibacter                   | 2 | 1  | 15 | 55794 | 25  | 0.066666667 | 4.48E-04    | 7.217721873 |
| 16S | genus  | TM7a                          | 2 | 3  | 15 | 55700 | 119 | 0.2         | 0.002131891 | 6.5517228   |
| ITS | genus  | Alternaria                    | 3 | 1  | 30 | 55814 | 5   | 0.033333333 | 8.96E-05    | 8.539649968 |
| 16S | genus  | Candidatus Udaeobacter        | 3 | 2  | 30 | 55323 | 496 | 0.066666667 | 0.008885863 | 2.907381752 |
| 16S | genus  | Chromobacterium               | 3 | 1  | 30 | 55812 | 7   | 0.033333333 | 1.25E-04    | 8.054223141 |
| ITS | genus  | Cladosporium                  | 3 | 1  | 30 | 55814 | 5   | 0.033333333 | 8.96E-05    | 8.539649968 |
| 16S | genus  | Devosia                       | 3 | 1  | 30 | 55777 | 42  | 0.033333333 | 7.52E-04    | 5.46926064  |
| ITS | genus  | Engyodontium                  | 3 | 1  | 30 | 55817 | 2   | 0.033333333 | 3.58E-05    | 9.861578063 |
| ITS | genus  | Gibberella                    | 3 | 1  | 30 | 55783 | 36  | 0.033333333 | 6.45E-04    | 5.691653061 |
| ITS | genus  | Gibellulopsis                 | 3 | 1  | 30 | 55809 | 10  | 0.033333333 | 1.79E-04    | 7.539649968 |
| 16S | genus  | Hydrogenophaga                | 3 | 4  | 30 | 55803 | 16  | 0.133333333 | 2.87E-04    | 8.861578063 |
| 16S | genus  | Ignavibacterium               | 3 | 1  | 30 | 55785 | 34  | 0.033333333 | 6.09E-04    | 5.774115221 |
| 16S | genus  | Leptothrix                    | 3 | 1  | 30 | 55810 | 9   | 0.033333333 | 1.61E-04    | 7.691653061 |
| ITS | genus  | Malassezia                    | 3 | 1  | 30 | 55791 | 28  | 0.033333333 | 5.02E-04    | 6.054223141 |
| 16S | genus  | Marinobacterium               | 3 | 1  | 30 | 55799 | 20  | 0.033333333 | 3.58E-04    | 6.539649968 |
| 16S | genus  | Methylophilus                 | 3 | 1  | 30 | 55813 | 6   | 0.033333333 | 1.07E-04    | 8.276615562 |
| ITS | genus  | Nectria                       | 3 | 1  | 30 | 55803 | 16  | 0.033333333 | 2.87E-04    | 6.861578063 |
| 16S | genus  | Novosphingobium               | 3 | 2  | 30 | 55769 | 50  | 0.066666667 | 8.96E-04    | 6.217721873 |
| 16S | genus  | Pseudarcobacter               | 3 | 1  | 30 | 55804 | 15  | 0.033333333 | 2.69E-04    | 6.954687467 |

|     |         |                                             |   |   |    |       |    |             |             |             |
|-----|---------|---------------------------------------------|---|---|----|-------|----|-------------|-------------|-------------|
| 16S | genus   | Ralstonia                                   | 3 | 1 | 30 | 55813 | 6  | 0.033333333 | 1.07E-04    | 8.276615562 |
| 16S | genus   | Rhodoblastus                                | 3 | 1 | 30 | 55804 | 15 | 0.033333333 | 2.69E-04    | 6.954687467 |
| 16S | genus   | Rhodoplanes                                 | 3 | 1 | 30 | 55770 | 49 | 0.033333333 | 8.78E-04    | 5.246868219 |
| 16S | genus   | Sphingomonas                                | 3 | 1 | 30 | 55742 | 77 | 0.033333333 | 0.001379459 | 4.594791522 |
| 16S | genus   | Sva0081 sediment group                      | 3 | 1 | 30 | 55771 | 48 | 0.033333333 | 8.60E-04    | 5.276615562 |
| ITS | genus   | Cryptococcus                                | 4 | 1 | 21 | 55778 | 41 | 0.047619048 | 7.35E-04    | 6.018599231 |
| ITS | genus   | Davidiella                                  | 4 | 2 | 21 | 55805 | 14 | 0.095238095 | 2.51E-04    | 8.568796313 |
| ITS | genus   | Didymella                                   | 4 | 2 | 21 | 55810 | 9  | 0.095238095 | 1.61E-04    | 9.206226234 |
| ITS | genus   | Dokmaia                                     | 4 | 2 | 21 | 55812 | 7  | 0.095238095 | 1.25E-04    | 9.568796313 |
| ITS | genus   | Gibellulopsis                               | 4 | 1 | 21 | 55809 | 10 | 0.047619048 | 1.79E-04    | 8.054223141 |
| ITS | genus   | Glomerella                                  | 4 | 5 | 21 | 55792 | 27 | 0.238095238 | 4.84E-04    | 8.943191828 |
| ITS | genus   | Guignardia                                  | 4 | 1 | 21 | 55816 | 3  | 0.047619048 | 5.37E-05    | 9.791188735 |
| ITS | genus   | Haematonectria                              | 4 | 1 | 21 | 55816 | 3  | 0.047619048 | 5.37E-05    | 9.791188735 |
| ITS | genus   | Kabatiella                                  | 4 | 1 | 21 | 55809 | 10 | 0.047619048 | 1.79E-04    | 8.054223141 |
| ITS | genus   | Penicillium                                 | 4 | 2 | 21 | 55794 | 25 | 0.095238095 | 4.48E-04    | 7.732295046 |
| ITS | genus   | Pestalotiopsis                              | 4 | 1 | 21 | 55804 | 15 | 0.047619048 | 2.69E-04    | 7.46926064  |
| ITS | genus   | Pseudocercospora                            | 4 | 2 | 21 | 55796 | 23 | 0.095238095 | 4.12E-04    | 7.852589279 |
| ITS | species | Leptosphaerulina chartarum                  | 2 | 1 | 1  | 55816 | 3  | 1           | 5.37E-05    | 14.18350616 |
| ITS | species | Cladosporium halotolerans                   | 3 | 1 | 4  | 55817 | 2  | 0.25        | 3.58E-05    | 12.76846866 |
| ITS | species | Engyodontium album                          | 3 | 1 | 4  | 55817 | 2  | 0.25        | 3.58E-05    | 12.76846866 |
| ITS | species | Gibellulopsis nigrescens                    | 3 | 1 | 4  | 55811 | 8  | 0.25        | 1.43E-04    | 10.76846866 |
| ITS | species | Malassezia restricta                        | 3 | 1 | 4  | 55807 | 12 | 0.25        | 2.15E-04    | 10.18350616 |
| ITS | species | Colletotrichum ignotum                      | 4 | 1 | 6  | 55818 | 1  | 0.166666667 | 1.79E-05    | 13.18350616 |
| ITS | species | Cryptococcus sp XVII Cryptococcus sp LCF_06 | 4 | 1 | 6  | 55818 | 1  | 0.166666667 | 1.79E-05    | 13.18350616 |
| ITS | species | Dokmaia monthadangii                        | 4 | 2 | 6  | 55812 | 7  | 0.333333333 | 1.25E-04    | 11.37615124 |
| ITS | species | Gibellulopsis nigrescens                    | 4 | 1 | 6  | 55811 | 8  | 0.166666667 | 1.43E-04    | 10.18350616 |
| ITS | species | Penicillium virgatum                        | 4 | 1 | 6  | 55818 | 1  | 0.166666667 | 1.79E-05    | 13.18350616 |

| <b>p.value</b> | <b>adj.p.value</b> |
|----------------|--------------------|
| 1.06E-05       | 2.11E-05           |
| 1.61E-37       | 1.61E-37           |
| 3.03E-04       | 0.001361493        |
| 1.09E-13       | 9.81E-13           |
| 0.003304615    | 0.009913845        |
| 0.010577948    | 0.021155896        |
| 5.07E-04       | 0.003039575        |
| 9.85E-06       | 6.52E-05           |
| 2.66E-05       | 7.97E-05           |
| 1.45E-05       | 6.52E-05           |
| 9.50E-38       | 1.90E-37           |
| 6.61E-20       | 7.93E-19           |
| 5.81E-05       | 3.49E-04           |
| 0.001322159    | 0.006610794        |
| 0.004926223    | 0.016420744        |
| 0.019562914    | 0.048907285        |
| 0.001177778    | 0.006610794        |
| 2.66E-05       | 2.92E-04           |
| 0.00101909     | 0.003736665        |
| 0.001634969    | 0.004496166        |
| 7.10E-04       | 0.003736665        |
| 0.024786033    | 0.045441061        |
| 8.88E-17       | 4.44E-16           |
| 8.35E-04       | 0.001044203        |
| 9.76E-06       | 1.63E-05           |
| 4.77E-12       | 1.19E-11           |
| 0.029918081    | 0.029918081        |
| 0.005300438    | 0.015901315        |
| 0.003003373    | 0.010011242        |
| 5.61E-04       | 0.002806991        |
| 4.10E-12       | 6.15E-11           |
| 0.001187085    | 0.005087505        |
| 4.64E-04       | 0.002784805        |
| 0.017227386    | 0.046983781        |
| 2.99E-17       | 8.97E-16           |
| 9.89E-05       | 7.41E-04           |
| 2.36E-06       | 2.36E-05           |
| 0.002641758    | 0.010567032        |
| 2.23E-05       | 3.57E-04           |
| 1.38E-04       | 0.001104781        |
| 0.007895403    | 0.021054407        |
| 0.019481243    | 0.044528556        |
| 0.006890272    | 0.021054407        |
| 0.001177778    | 0.006281484        |

|             |             |
|-------------|-------------|
| 5.28E-05    | 4.75E-04    |
| 2.66E-05    | 4.75E-04    |
| 0.00137325  | 0.008239499 |
| 0.00292981  | 0.013184145 |
| 0.012816088 | 0.046137917 |
| 0.004327295 | 0.006181849 |
| 5.49E-10    | 2.75E-09    |
| 0.003934644 | 0.006181849 |
| 5.69E-04    | 0.001137465 |
| 9.76E-06    | 3.25E-05    |
| 5.69E-04    | 0.001137465 |
| 3.16E-14    | 3.16E-13    |
| 0.023772541 | 0.026413935 |
| 0.014484505 | 0.018105631 |
| 0.008836863 | 0.025830831 |
| 0.003670701 | 0.015498514 |
| 3.09E-12    | 5.86E-11    |
| 0.001225353 | 0.006651918 |
| 0.007940993 | 0.025830831 |
| 0.016070328 | 0.043619462 |
| 0.008566216 | 0.025830831 |
| 7.54E-05    | 5.73E-04    |
| 1.19E-17    | 4.50E-16    |
| 0.002288212 | 0.010869006 |
| 1.19E-06    | 1.51E-05    |
| 1.90E-04    | 0.001201321 |
| 9.74E-06    | 9.25E-05    |
| 0.007815253 | 0.025830831 |
| 0.001060853 | 0.00381907  |
| 0.01473178  | 0.033146505 |
| 9.35E-04    | 0.00381907  |
| 2.23E-05    | 2.01E-04    |
| 0.001667362 | 0.005002086 |
| 0.003331645 | 0.008567087 |
| 2.21E-06    | 3.97E-05    |
| 4.29E-04    | 0.002574969 |
| 6.82E-08    | 1.76E-06    |
| 1.35E-07    | 1.76E-06    |
| 0.004203103 | 0.027320167 |
| 0.003925956 | 0.027320167 |
| 0.007394982 | 0.038453906 |
| 0.006680097 | 0.009185134 |
| 0.004327295 | 0.006800034 |
| 3.73E-05    | 1.03E-04    |
| 0.003934644 | 0.006800034 |



|             |             |
|-------------|-------------|
| 4.68E-13    | 5.15E-12    |
| 4.29E-10    | 2.36E-09    |
| 0.042476832 | 0.042476832 |
| 9.76E-06    | 3.58E-05    |
| 0.008245683 | 0.010078057 |
| 0.016038346 | 0.017642181 |
| 5.69E-04    | 0.001251212 |
| 6.15E-07    | 5.53E-06    |
| 8.16E-21    | 2.20E-19    |
| 8.21E-14    | 1.11E-12    |
| 0.012824105 | 0.031477349 |
| 3.79E-06    | 2.56E-05    |
| 0.010698041 | 0.028884712 |
| 0.00345997  | 0.010379909 |
| 1.18E-04    | 4.56E-04    |
| 8.94E-06    | 4.72E-05    |
| 1.05E-05    | 4.72E-05    |
| 0.001806759 | 0.006097812 |
| 0.039305387 | 0.043235926 |
| 0.002684226 | 0.004921081 |
| 0.018384772 | 0.022470276 |
| 5.23E-05    | 2.87E-04    |
| 6.88E-04    | 0.002216431 |
| 0.002684226 | 0.004921081 |
| 8.06E-04    | 0.002216431 |
| 0.007231982 | 0.009943976 |
| 0.006697958 | 0.009943976 |
| 4.22E-06    | 4.64E-05    |
| 0.002684466 | 0.011501867 |
| 0.029092195 | 0.034633566 |
| 0.003756301 | 0.01173844  |
| 0.002684466 | 0.011501867 |
| 0.022334142 | 0.031019642 |
| 0.001074624 | 0.008955197 |
| 0.019173331 | 0.028196076 |
| 0.005361965 | 0.013404914 |
| 1.23E-10    | 3.07E-09    |
| 0.018117535 | 0.028196076 |
| 0.004827022 | 0.013404914 |
| 0.014943548 | 0.024905913 |
| 0.010696134 | 0.019100239 |
| 0.003220523 | 0.011501867 |
| 0.008565793 | 0.016472679 |
| 3.37E-04    | 0.004207664 |
| 0.008032516 | 0.016472679 |

|             |             |
|-------------|-------------|
| 0.003220523 | 0.011501867 |
| 0.008032516 | 0.016472679 |
| 0.02600931  | 0.032511638 |
| 0.040576885 | 0.046110096 |
| 0.025485105 | 0.032511638 |
| 0.015314806 | 0.015314806 |
| 1.22E-05    | 3.67E-05    |
| 4.85E-06    | 1.94E-05    |
| 2.83E-06    | 1.70E-05    |
| 0.003756099 | 0.004507319 |
| 3.62E-13    | 4.34E-12    |
| 0.001128244 | 0.001692365 |
| 0.001128244 | 0.001692365 |
| 0.003756099 | 0.004507319 |
| 4.02E-05    | 8.05E-05    |
| 0.005629107 | 0.006140843 |
| 3.39E-05    | 8.05E-05    |
| 5.37E-05    | 5.37E-05    |
| 1.43E-04    | 2.87E-04    |
| 1.43E-04    | 2.87E-04    |
| 5.73E-04    | 7.64E-04    |
| 8.60E-04    | 8.60E-04    |
| 1.07E-04    | 1.34E-04    |
| 1.07E-04    | 1.34E-04    |
| 2.02E-07    | 1.01E-06    |
| 8.60E-04    | 8.60E-04    |
| 1.07E-04    | 1.34E-04    |

**Table S9: Number of shared GO terms between clusters.** Columns C1, C2, and C3 represent the ASV groups (C1, cluster 1; C2, cluster 2; C3, cluster 3), if an “X” is present then GO terms are included in the group. The number of GO terms enriched/depleted in each group is reported in the last two columns. The total number of terms detected in the inferred genomes of ASVs assigned to each cluster was marked with “Tot” and reported in the last three rows of the table.

| C1  | C2  | C3  | Depleted | Enriched |
|-----|-----|-----|----------|----------|
| X   |     |     | 18       | 200      |
|     | X   |     | 12       | 76       |
|     |     | X   | 19       | 204      |
| X   | X   |     | 1        | 51       |
| X   |     | X   | 2        | 71       |
|     | X   | X   | 1        | 67       |
| X   | X   | X   | 0        | 37       |
| Tot |     |     | 21       | 359      |
|     | Tot |     | 14       | 231      |
|     |     | Tot | 22       | 379      |

**Table S10: Gene ontology terms enriched/depleted in ASV clusters.** Columns report the number of genes found in the inferred genome of ASVs included in the group of interest as well as in the whole community as used in the hypergeometric test. Values were weighted using the inferred copy number as obtained by PICRUSt2 (“genome\_function\_count”). Columns correspond to: GO, gene ontology term; Cluster, the group of ASVs considered; x, the number of genes classified with the GO term reported in the cluster of interest; k, the number of GO terms in the cluster considered; n, the number of GO terms outside the cluster; m, the number of GO term detected in the inferred genome of the ASVs in the whole community; p\_obs, the probability of having a gene assigned to the GO term of interest in the ASV cluster; p\_exp, the probability of having a gene assigned to the GO term of interest in the whole community; log2.fold.enrichment,  $\log_2$  of the ratio between p\_obs and p\_exp; p.value, the p value; adj.p.value, p value adjusted following the Benjamini–Hochberg method.

| GO         | Cluster | x  | k     | m     | n        | p_obs       | p_exp       | log2.fold.enrichment | p.value     | adj.p.value | Term                                                           | Reaction                                                                                                                                                                                                            |
|------------|---------|----|-------|-------|----------|-------------|-------------|----------------------|-------------|-------------|----------------------------------------------------------------|---------------------------------------------------------------------------------------------------------------------------------------------------------------------------------------------------------------------|
| GO:0000210 | 2       | 19 | 22861 | 15239 | 46163338 | 8.31111E+11 | 3.30002E+12 | 1.33257E+16          | 3.22955E+11 | 1.19702E+16 | NAD+ diphosphatase activity                                    | Catalysis of the reaction: NAD+ + H2O = AMP + NMN.                                                                                                                                                                  |
| GO:0000257 | 3       | 18 | 26855 | 9106  | 46169471 | 6.70266E+11 | 1.97191E+12 | 1.76514E+16          | 1.14357E+11 | 75791380398 | nitrilase activity                                             | Catalysis of the reaction: a nitrile + H2O = a carboxylate + NH3. Acts on a wide range of aromatic nitriles including (indole-3-yl)-acetonitrile and some aliphatic nitriles, and on the corresponding acid amides. |
| GO:0000257 | 1       | 3  | 60795 | 9106  | 46169471 | 49346163336 | 1.97191E+12 | -1.99858E+15         | 2.30059E+15 | 6.42215E+15 | nitrilase activity                                             | Catalysis of the reaction: a nitrile + H2O = a carboxylate + NH3. Acts on a wide range of aromatic nitriles including (indole-3-yl)-acetonitrile and some aliphatic nitriles, and on the corresponding acid amides. |
| GO:0000309 | 1       | 11 | 60795 | 2676  | 46175901 | 1.80936E+12 | 5794894892  | 1.64262E+16          | 1.06272E+16 | 3.33178E+16 | nicotinamide-nucleotide adenyltransferase activity             | Catalysis of the reaction: ATP + nicotinamide nucleotide = diphosphate + NAD+.                                                                                                                                      |
| GO:0000309 | 3       | 10 | 26855 | 2676  | 46175901 | 3.7237E+11  | 5794894892  | 2.68388E+16          | 5554923814  | 4132663140  | nicotinamide-nucleotide adenyltransferase activity             | Catalysis of the reaction: ATP + nicotinamide nucleotide = diphosphate + NAD+.                                                                                                                                      |
| GO:0000310 | 1       | 57 | 60795 | 10422 | 46168155 | 9.37577E+11 | 2.25689E+11 | 2.0546E+15           | 0.021648018 | 2.979488881 | xanthine phosphoribosyltransferase activity                    | Catalysis of the reaction: 5-phospho-alpha-D-ribose 1-diphosphate + xanthine = (9-D-ribosylxanthine)-5'-phosphate + diphosphate.                                                                                    |
| GO:0000310 | 3       | 16 | 26855 | 10422 | 46168155 | 5.95792E+11 | 2.25689E+11 | 1.40047E+15          | 5.62385E+11 | 1.90648E+16 | xanthine phosphoribosyltransferase activity                    | Catalysis of the reaction: 5-phospho-alpha-D-ribose 1-diphosphate + xanthine = (9-D-ribosylxanthine)-5'-phosphate + diphosphate.                                                                                    |
| GO:0000334 | 1       | 7  | 60795 | 2149  | 46176428 | 1.15141E+12 | 4.65367E+11 | 1.30696E+14          | 2.55281E+15 | 4.72882E+16 | 3-hydroxyanthranilate 3,4-dioxygenase activity                 | Catalysis of the reaction: 3-hydroxyanthranilate + O(2) = cis,cis-2-amino-3-(3-oxoprop-1-enyl)but-2-enedioate + H(+).                                                                                               |
| GO:0000721 | 1       | 13 | 60795 | 2082  | 46176495 | 2.13833E+11 | 45085841428 | 2.24574E+16          | 6174988745  | 4.51266E+11 | (R,R)-butanediol dehydrogenase activity                        | Catalysis of the reversible reaction: (R,R)-butane-2,3-diol + NAD+ = (R)-acetoin + NADH + H(+).                                                                                                                     |
| GO:0000721 | 2       | 5  | 22861 | 2082  | 46176495 | 2.18713E+12 | 45085841428 | 2.27829E+16          | 4.13914E+15 | 1.05172E+15 | (R,R)-butanediol dehydrogenase activity                        | Catalysis of the reversible reaction: (R,R)-butane-2,3-diol + NAD+ = (R)-acetoin + NADH + H(+).                                                                                                                     |
| GO:0000773 | 3       | 18 | 26855 | 6644  | 46171933 | 6.70266E+11 | 1.43876E+12 | 2.21991E+16          | 1484472251  | 18687152205 | phosphatidyl-N-methylethanolamine N-methyltransferase activity | Catalysis of the reaction: S-adenosyl-L-methionine + phosphatidyl-N-methylethanolamine = S-adenosyl-L-homocysteine + phosphatidyl-N-dimethylethanolamine.                                                           |
| GO:0000810 | 1       | 14 | 60795 | 822   | 46177755 | 2.30282E+12 | 1.78005E+11 | 3.69342E+16          | 114928.4654 | 3982716.404 | diacylglycerol diphosphate phosphatase activity                | Catalysis of the reaction: a 1,2-diacyl-sn-glycerol 3-diphosphate + H2O = a 1,2-diacyl-sn-glycerol 3-phosphate + phosphate.                                                                                         |
| GO:0000908 | 1       | 28 | 60795 | 8726  | 46169851 | 4.60564E+12 | 1.88962E+12 | 1.28531E+16          | 26264941693 | 1.47951E+12 | taurine dioxygenase activity                                   | Catalysis of the reaction: 2-oxoglutarate + O(2) + taurine = aminoacetaldehyde + CO(2) + succinate + sulfite.                                                                                                       |
| GO:0000908 | 2       | 11 | 22861 | 8726  | 46169851 | 4.81169E+11 | 1.88962E+12 | 1.34845E+16          | 4.97148E+15 | 1.2252E+16  | taurine dioxygenase activity                                   | Catalysis of the reaction: 2-oxoglutarate + O(2) + taurine = aminoacetaldehyde + CO(2) + succinate + sulfite.                                                                                                       |
| GO:0000908 | 3       | 11 | 26855 | 8726  | 46169851 | 4.09607E+12 | 1.88962E+12 | 1.11614E+16          | 1.50617E+16 | 3.06656E+16 | taurine dioxygenase activity                                   | Catalysis of the reaction: 2-oxoglutarate + O(2) + taurine = aminoacetaldehyde + CO(2) + succinate + sulfite.                                                                                                       |

|            |   |    |       |       |          |             |             |              |             |             |                                                                                    |                                                                                                                                              |
|------------|---|----|-------|-------|----------|-------------|-------------|--------------|-------------|-------------|------------------------------------------------------------------------------------|----------------------------------------------------------------------------------------------------------------------------------------------|
| GO:0003756 | 3 | 27 | 26855 | 13186 | 46165391 | 1.0054E+15  | 2.85544E+11 | 1.81599E+16  | 44428702.28 | 657512945.2 | protein disulfide isomerase activity                                               | Catalysis of the rearrangement of both intrachain and interchain disulfide bonds in proteins.                                                |
| GO:0003796 | 1 | 19 | 60795 | 3218  | 46175359 | 3.12526E+11 | 69685993139 | 2.16503E+16  | 1189805322  | 15497495822 | lysozyme activity                                                                  | Catalysis of the hydrolysis of the beta-(1->4) linkages between N-acetylmuramic acid and N-acetyl-D-glucosamine residues in a peptidoglycan. |
| GO:0003796 | 3 | 6  | 26855 | 3218  | 46175359 | 2.23422E+12 | 69685993139 | 1.68083E+15  | 1.23275E+16 | 2.60359E+15 | lysozyme activity                                                                  | Catalysis of the hydrolysis of the beta-(1->4) linkages between N-acetylmuramic acid and N-acetyl-D-glucosamine residues in a peptidoglycan. |
| GO:0003796 | 2 | 5  | 22861 | 3218  | 46175359 | 2.18713E+12 | 69685993139 | 1.6501E+16   | 2.32663E+16 | 4.36666E+15 | lysozyme activity                                                                  | Catalysis of the hydrolysis of the beta-(1->4) linkages between N-acetylmuramic acid and N-acetyl-D-glucosamine residues in a peptidoglycan. |
| GO:0003847 | 3 | 1  | 26855 | 14    | 46178563 | 37237013592 | 3031708838  | 6.94046E+15  | 8.11095E+13 | 1.85747E+15 | 1-alkyl-2-acetyl-glycerophosphocholine esterase activity                           | Catalysis of the reaction: 2-acetyl-1-alkyl-sn-glycero-3-phosphocholine + H2O = 1-alkyl-sn-glycero-3-phosphocholine + acetate.               |
| GO:0003857 | 3 | 74 | 26855 | 50269 | 46128308 | 2.75554E+16 | 1.08858E+16 | 1.33989E+16  | 2801.957179 | 1134243.254 | 3-hydroxyacyl-CoA dehydrogenase activity                                           | Catalysis of the reaction: (S)-3-hydroxyacyl-CoA + NAD+ = 3-oxoacyl-CoA + NADH + H(+).                                                       |
| GO:0003858 | 3 | 31 | 26855 | 15876 | 46162701 | 1.15435E+16 | 3.43796E+11 | 1.74745E+16  | 136822179.2 | 2305872563  | 3-hydroxybutyrate dehydrogenase activity                                           | Catalysis of the reaction: (R)-3-hydroxybutanoate + NAD(+) = acetoacetate + H(+) + NADH.                                                     |
| GO:0003859 | 3 | 12 | 26855 | 5947  | 46172630 | 4.46844E+12 | 1.28783E+16 | 1.79483E+16  | 2.58185E+11 | 9.97236E+11 | 3-hydroxybutyryl-CoA dehydratase activity                                          | Catalysis of the reaction: (R)-3-hydroxybutanoyl-CoA = crotonoyl-CoA + H(2)O.                                                                |
| GO:0003868 | 2 | 22 | 22861 | 22067 | 46156510 | 96233760553 | 4.77862E+12 | 1.00995E+16  | 2.06419E+16 | 5.85373E+15 | 4-hydroxyphenylpyruvate dioxygenase activity                                       | Catalysis of the reaction: 4-hydroxyphenylpyruvate + O2 = homogentisate + CO2.                                                               |
| GO:0003868 | 3 | 36 | 26855 | 22067 | 46156510 | 1.34053E+16 | 4.77862E+12 | 1.48814E+16  | 84823827.31 | 11635800099 | 4-hydroxyphenylpyruvate dioxygenase activity                                       | Catalysis of the reaction: 4-hydroxyphenylpyruvate + O2 = homogentisate + CO2.                                                               |
| GO:0003870 | 3 | 14 | 26855 | 7455  | 46171122 | 5.21318E+11 | 1.61438E+11 | 1.69118E+16  | 1.72211E+12 | 7.08228E+11 | 5-aminolevulinate synthase activity                                                | Catalysis of the reaction: glycine + H(+) + succinyl-CoA = 5-aminolevulinate + CO(2) + CoA.                                                  |
| GO:0003871 | 3 | 31 | 26855 | 21825 | 46156752 | 1.15435E+16 | 4.72622E+11 | 1.28832E+16  | 9791509136  | 66168807238 | 5-methyltetrahydropteroyltri-L-glutamate-homocysteine S-methyltransferase activity | Catalysis of the reaction: 5-methyltetrahydropteroyltri-L-glutamate + L-homocysteine = L-methionine + tetrahydropteroyltri-L-glutamate.      |
| GO:0003877 | 1 | 11 | 60795 | 18999 | 46159578 | 1.80936E+12 | 4.11425E+11 | -1.18515E+16 | 1.39565E+16 | 4.21245E+15 | ATP adenyltransferase activity                                                     | Catalysis of the reaction: ADP + ATP = phosphate + P(1),P(4)-bis(5'-adenosyl)tetraphosphate.                                                 |
| GO:0003877 | 3 | 4  | 26855 | 18999 | 46159578 | 1.48948E+12 | 4.11425E+11 | -1.46582E+16 | 1.45804E+16 | 2.99218E+15 | ATP adenyltransferase activity                                                     | Catalysis of the reaction: ADP + ATP = phosphate + P(1),P(4)-bis(5'-adenosyl)tetraphosphate.                                                 |
| GO:0003886 | 3 | 39 | 26855 | 30006 | 46148571 | 1.45224E+16 | 6.49782E+11 | 1.16026E+16  | 5998910605  | 4.41524E+11 | DNA (cytosine-5-)-methyltransferase activity                                       | Catalysis of the reaction: S-adenosyl-L-methionine + DNA containing cytosine = S-adenosyl-L-homocysteine + DNA containing 5-methylcytosine.  |
| GO:0003920 | 1 | 14 | 60795 | 3240  | 46175337 | 2.30282E+12 | 70162404528 | 1.71463E+16  | 1.45182E+12 | 6.14196E+11 | GMP reductase activity                                                             | Catalysis of the reaction: IMP + NADP(+) + NH(4)(+) = GMP + 2 H(+) + NADPH.                                                                  |

|            |   |     |       |        |          |             |             |              |             |             |                                                           |                                                                                                                                                                        |
|------------|---|-----|-------|--------|----------|-------------|-------------|--------------|-------------|-------------|-----------------------------------------------------------|------------------------------------------------------------------------------------------------------------------------------------------------------------------------|
| GO:0003920 | 3 | 11  | 26855 | 3240   | 46175337 | 4.09607E+12 | 70162404528 | 2.54547E+16  | 4724747428  | 36261119205 | GMP reductase activity                                    | Catalysis of the reaction: IMP + NADP(+) + NH(4)(+) = GMP + 2 H(+) + NADPH.                                                                                            |
| GO:0003939 | 1 | 11  | 60795 | 17299  | 46161278 | 1.80936E+12 | 3.74611E+12 | -1.04991E+16 | 4.98578E+15 | 1.22757E+16 | L-iditol 2-dehydrogenase activity                         | Catalysis of the reaction: L-iditol + NAD+ = L-sorbose + NADH + H+.                                                                                                    |
| GO:0003939 | 3 | 1   | 26855 | 17299  | 46161278 | 37237013592 | 3.74611E+12 | -3.33058E+16 | 4.70946E+11 | 1.63819E+16 | L-iditol 2-dehydrogenase activity                         | Catalysis of the reaction: L-iditol + NAD+ = L-sorbose + NADH + H+.                                                                                                    |
| GO:0003941 | 1 | 133 | 60795 | 30510  | 46148067 | 2.18768E+15 | 6.60696E+11 | 1.72734E+14  | 5.7591E-16  | 3.39705E-12 | L-serine ammonia-lyase activity                           | Catalysis of the reaction: L-serine = pyruvate + NH3.                                                                                                                  |
| GO:0003948 | 2 | 10  | 22861 | 7626   | 46170951 | 4.37426E+11 | 1.65142E+12 | 1.40534E+16  | 5.53496E+15 | 1.34434E+16 | N4-(beta-N-acetylglucosaminyl)-L-asparaginase activity    | Catalysis of the reaction: N(4)-(beta-N-acetyl-D-glucosaminyl)-L-asparagine + H(2)O = N-acetyl-beta-D-glucosaminylamine + L-aspartate + H(+).                          |
| GO:0003955 | 2 | 35  | 22861 | 32619  | 46145958 | 1.53099E+16 | 7.06367E+11 | 1.11598E+16  | 3.18393E+11 | 1.7552E+11  | NAD(P)H dehydrogenase (quinone) activity                  | Catalysis of the reaction: NAD(P)H + H+ + a quinone = NAD(P)+ + a hydroquinone.                                                                                        |
| GO:0003959 | 3 | 5   | 26855 | 780    | 46177797 | 1.86185E+11 | 16890949238 | 3.46242E+15  | 1.08705E+12 | 4.8471E+12  | NADPH dehydrogenase activity                              | Catalysis of the reaction: NADPH + H+ + acceptor = NADP+ + reduced acceptor.                                                                                           |
| GO:0003960 | 3 | 67  | 26855 | 53636  | 46124941 | 2.49488E+16 | 1.16149E+16 | 1.10299E+16  | 173461013.5 | 2819765846  | NADPH:quinone reductase activity                          | Catalysis of the reaction: NADPH + H+ + quinone = NADP+ + semiquinone.                                                                                                 |
| GO:0003961 | 3 | 45  | 26855 | 38007  | 46140570 | 1.67567E+16 | 8.23044E+11 | 1.02569E+16  | 1.23974E+11 | 80995227621 | O-acetylhomoserine aminocarboxypropyltransferase activity | Catalysis of the reaction: O-acetyl-L-homoserine + methanethiol = L-methionine + acetate. Also reacts with other thiols and H2S, producing homocysteine or thioethers. |
| GO:0003963 | 3 | 7   | 26855 | 4312   | 46174265 | 2.60659E+12 | 93376632199 | 1.48103E+15  | 1.43677E+16 | 2.95292E+16 | RNA-3'-phosphate cyclase activity                         | Catalysis of the reaction: ATP + RNA 3'-terminal-phosphate = AMP + diphosphate + RNA terminal-2',3'-cyclic-phosphate.                                                  |
| GO:0003974 | 2 | 5   | 22861 | 2363   | 46176214 | 2.18713E+12 | 51170914167 | 2.09564E+16  | 6.96899E+15 | 1.64053E+16 | UDP-N-acetylglucosamine 4-epimerase activity              | Catalysis of the reaction: UDP-N-acetyl-D-glucosamine = UDP-N-acetyl-D-galactosamine.                                                                                  |
| GO:0003985 | 3 | 187 | 26855 | 128443 | 46050134 | 6.96332E+15 | 2.78144E+16 | 1.32394E+16  | 6.38679E-14 | 2.19759E-09 | acetyl-CoA C-acetyltransferase activity                   | Catalysis of the reaction: 2 acetyl-CoA = CoA + acetoacetyl-CoA.                                                                                                       |
| GO:0003997 | 2 | 9   | 22861 | 2475   | 46176102 | 3.93684E+12 | 5.35963E+11 | 2.87683E+15  | 56623180887 | 4.18991E+11 | acyl-CoA oxidase activity                                 | Catalysis of the reaction: acyl-CoA + O2 = trans-2,3-dehydroacyl-CoA + hydrogen peroxide.                                                                              |
| GO:0004000 | 2 | 23  | 22861 | 20711  | 46157866 | 1.00608E+16 | 4.48498E+11 | 1.16557E+15  | 4.11897E+11 | 1.4674E+16  | adenosine deaminase activity                              | Catalysis of the reaction: adenosine + H2O = inosine + NH3.                                                                                                            |
| GO:0004000 | 3 | 27  | 26855 | 20711  | 46157866 | 1.0054E+15  | 4.48498E+11 | 1.1646E+16   | 1.39985E+12 | 5.97104E+11 | adenosine deaminase activity                              | Catalysis of the reaction: adenosine + H2O = inosine + NH3.                                                                                                            |
| GO:0004001 | 2 | 11  | 22861 | 10622  | 46167955 | 4.81169E+11 | 2.3002E+12  | 1.06478E+16  | 1.89795E+16 | 3.72463E+15 | adenosine kinase activity                                 | Catalysis of the reaction: ATP + adenosine = ADP + AMP.                                                                                                                |
| GO:0004001 | 3 | 16  | 26855 | 10622  | 46167955 | 5.95792E+11 | 2.3002E+12  | 1.37305E+15  | 6.85455E+11 | 2.2498E+16  | adenosine kinase activity                                 | Catalysis of the reaction: ATP + adenosine = ADP + AMP.                                                                                                                |
| GO:0004021 | 1 | 26  | 60795 | 8669   | 46169908 | 4.27667E+11 | 1.87728E+12 | 1.18785E+16  | 1.43037E+12 | 6.07614E+11 | L-alanine:2-oxoglutarate aminotransferase activity        | Catalysis of the reaction: 2-oxoglutarate + L-alanine = L-glutamate + pyruvate.                                                                                        |
| GO:0004021 | 3 | 17  | 26855 | 8669   | 46169908 | 6.33029E+11 | 1.87728E+12 | 1.75363E+16  | 2.17742E+11 | 1.28805E+11 | L-alanine:2-oxoglutarate aminotransferase activity        | Catalysis of the reaction: 2-oxoglutarate + L-alanine = L-glutamate + pyruvate.                                                                                        |
| GO:0004037 | 3 | 7   | 26855 | 1996   | 46176581 | 2.60659E+12 | 4.32235E+11 | 2.59228E+16  | 2.04201E+12 | 8.14633E+11 | allantoicase activity                                     | Catalysis of the reaction: allantoate + H(2)O = (S)-ureidoglycolate + urea.                                                                                            |
| GO:0004039 | 1 | 16  | 60795 | 5200   | 46173377 | 2.6318E+11  | 1.12606E+12 | 1.22476E+16  | 1.92329E+16 | 5.51859E+16 | allophanate hydrolase activity                            | Catalysis of the reaction: H(2)O + 3 H(+) + urea-1-carboxylate = 2 CO(2) + 2 NH(4)(+).                                                                                 |

|            |   |     |       |       |          |             |             |              |             |             |                                         |                                                                                                                                     |
|------------|---|-----|-------|-------|----------|-------------|-------------|--------------|-------------|-------------|-----------------------------------------|-------------------------------------------------------------------------------------------------------------------------------------|
| GO:0004039 | 3 | 8   | 26855 | 5200  | 46173377 | 2.97896E+11 | 1.12606E+12 | 1.40352E+16  | 1.24015E+16 | 2.61522E+16 | allophanate hydrolase activity          | Catalysis of the reaction: H(2)O + 3 H(+) + urea-1-carboxylate = 2 CO(2) + 2 NH(4)(+).                                              |
| GO:0004040 | 2 | 42  | 22861 | 41262 | 46137315 | 1.83719E+16 | 8.93531E+11 | 1.03991E+16  | 18854389262 | 1.14149E+12 | amidase activity                        | Catalysis of the reaction: a monocarboxylic acid amide + H2O = a monocarboxylate + NH3.                                             |
| GO:0004053 | 2 | 11  | 22861 | 11088 | 46167489 | 4.81169E+11 | 2.40111E+12 | 1.00284E+16  | 2.48972E+16 | 4.62858E+14 | arginase activity                       | Catalysis of the reaction: L-arginine + H2O = L-ornithine + urea.                                                                   |
| GO:0004053 | 3 | 22  | 26855 | 11088 | 46167489 | 8.19214E+11 | 2.40111E+12 | 1.77054E+16  | 1231284564  | 11540005428 | arginase activity                       | Catalysis of the reaction: L-arginine + H2O = L-ornithine + urea.                                                                   |
| GO:0004057 | 3 | 34  | 26855 | 17578 | 46160999 | 1.26606E+16 | 3.80653E+12 | 1.7338E+16   | 3563874.214 | 68126095.51 | arginyltransferase activity             | Catalysis of the reaction: L-arginyl-tRNA + protein = tRNA + L-arginyl-protein.                                                     |
| GO:0004061 | 3 | 18  | 26855 | 5547  | 46173030 | 6.70266E+11 | 1.20121E+12 | 2.48025E+16  | 104338878.3 | 1802574178  | arylformamidase activity                | Catalysis of the reaction: N-formyl-L-kynurenine + H2O = formate + L-kynurenine.                                                    |
| GO:0004067 | 1 | 91  | 60795 | 24846 | 46153731 | 1.49683E+16 | 5.38042E+11 | 1.47612E+15  | 0.044382934 | 49.52895559 | asparaginase activity                   | Catalysis of the reaction: L-asparagine + H2O = L-aspartate + NH3.                                                                  |
| GO:0004071 | 1 | 38  | 60795 | 3291  | 46175286 | 6.25051E+11 | 7126681275  | 3.13267E+16  | 3.71856E-07 | 8.08101E-07 | aspartate-ammonia ligase activity       | Catalysis of the reaction: ATP + L-aspartate + NH3 = AMP + diphosphate + L-asparagine.                                              |
| GO:0004085 | 3 | 21  | 26855 | 16959 | 46161618 | 7.81977E+11 | 3.67248E+11 | 1.09037E+16  | 1.34081E+16 | 4.06476E+15 | butyryl-CoA dehydrogenase activity      | Catalysis of the reaction: butanoyl-CoA + electron-transfer flavoprotein = 2-butenoyl-CoA + reduced electron-transfer flavoprotein. |
| GO:0004096 | 2 | 28  | 22861 | 24406 | 46154171 | 1.22479E+16 | 5.28513E+11 | 1.21253E+16  | 61905260360 | 3.09491E+12 | catalase activity                       | Catalysis of the reaction: 2 hydrogen peroxide = O2 + 2 H2O.                                                                        |
| GO:0004096 | 3 | 30  | 26855 | 24406 | 46154171 | 1.11711E+16 | 5.28513E+11 | 1.07976E+16  | 1.69032E+11 | 6.9654E+11  | catalase activity                       | Catalysis of the reaction: 2 hydrogen peroxide = O2 + 2 H2O.                                                                        |
| GO:0004097 | 1 | 1   | 60795 | 3     | 46178574 | 16448721112 | 64965189.38 | 7.98409E+15  | 3.94436E+16 | 1.01031E+16 | catechol oxidase activity               | Catalysis of the reaction: 2 catechol + O2 = 2 1,2-benzoquinone + 2 H2O.                                                            |
| GO:0004099 | 1 | 9   | 60795 | 546   | 46178031 | 1.48038E+12 | 1.18237E+11 | 3.64622E+15  | 70022459.68 | 976766000.1 | chitin deacetylase activity             | Catalysis of the reaction: chitin + H2O = chitosan + acetate.                                                                       |
| GO:0004109 | 3 | 30  | 26855 | 22823 | 46155754 | 1.11711E+16 | 4.94234E+11 | 1.17651E+16  | 53943732358 | 2.74641E+12 | coproporphyrinogen oxidase activity     | Catalysis of the reaction: coproporphyrinogen III + 2 H(+) + O(2) = 2 CO(2) + 2 H(2)O + protoporphyrinogen IX.                      |
| GO:0004121 | 1 | 134 | 60795 | 36192 | 46142385 | 2.20413E+16 | 7.8374E+11  | 1.49176E+16  | 9.58948E-10 | 2.47468E-07 | cystathionine beta-lyase activity       | Catalysis of the reaction: cystathionine + H2O = L-homocysteine + NH3 + pyruvate.                                                   |
| GO:0004122 | 2 | 20  | 22861 | 14823 | 46163754 | 8.74852E+11 | 3.20993E+12 | 1.4465E+16   | 82535541599 | 3.86821E+11 | cystathionine beta-synthase activity    | Catalysis of the reaction: L-serine + L-homocysteine = cystathionine + H2O.                                                         |
| GO:0004123 | 2 | 1   | 22861 | 11852 | 46166725 | 4.37426E+11 | 2.56656E+12 | -2.55272E+15 | 1.94058E+15 | 3.77776E+15 | cystathionine gamma-lyase activity      | Catalysis of the reaction: L-cystathionine + H2O = 2-oxobutanoate + L-cysteine + NH4+.                                              |
| GO:0004126 | 1 | 86  | 60795 | 31804 | 46146773 | 1.41459E+15 | 6.88718E+11 | 1.0384E+16   | 15015614.59 | 31312864.97 | cytidine deaminase activity             | Catalysis of the reaction: cytidine + H2O = uridine + NH3.                                                                          |
| GO:0004130 | 2 | 45  | 22861 | 40576 | 46138001 | 1.96842E+16 | 8.78676E+11 | 1.16363E+16  | 11613072256 | 1.09726E+11 | cytochrome-c peroxidase activity        | Catalysis of the reaction: 2 ferrocyclochrome c + hydrogen peroxide = 2 ferricytochrome c + 2 H2O.                                  |
| GO:0004131 | 3 | 16  | 26855 | 10088 | 46168489 | 5.95792E+11 | 2.18456E+12 | 1.44746E+16  | 3.98855E+12 | 1.42463E+16 | cytosine deaminase activity             | Catalysis of the reaction: cytosine + H2O = uracil + NH3.                                                                           |
| GO:0004131 | 2 | 18  | 22861 | 10088 | 46168489 | 7.87367E+11 | 2.18456E+12 | 1.84969E+16  | 5271338638  | 39504867721 | cytosine deaminase activity             | Catalysis of the reaction: cytosine + H2O = uracil + NH3.                                                                           |
| GO:0004132 | 1 | 49  | 60795 | 15079 | 46163498 | 8.05987E+11 | 3.26537E+11 | 1.30351E+15  | 244185064.1 | 3848244770  | dCMP deaminase activity                 | Catalysis of the reaction: dCMP + H2O = dUMP + NH3.                                                                                 |
| GO:0004139 | 3 | 10  | 26855 | 34732 | 46143845 | 3.7237E+11  | 7.52124E+11 | -1.01423E+15 | 9.67819E+15 | 2.13232E+16 | deoxyribose-phosphate aldolase activity | Catalysis of the reaction: 2-deoxy-D-ribose 5-phosphate = D-                                                                        |



|            |   |    |       |       |          |             |             |             |             |             |                                             |                                                                                                                                                                                   |
|------------|---|----|-------|-------|----------|-------------|-------------|-------------|-------------|-------------|---------------------------------------------|-----------------------------------------------------------------------------------------------------------------------------------------------------------------------------------|
| GO:0004143 | 1 | 78 | 60795 | 29428 | 46149149 | 1.283E+16   | 6.37265E+11 | 1.00956E+15 | 18630115.2  | 3004833815  | diacylglycerol kinase activity              | glyceraldehyde 3-phosphate + acetaldehyde.<br>Catalysis of the reaction: NTP + 1,2-diacylglycerol = NDP + 1,2-diacylglycerol-3-phosphate.                                         |
| GO:0004144 | 1 | 11 | 60795 | 3781  | 46174796 | 1.80936E+12 | 81877793679 | 1.14393E+16 | 1.32342E+16 | 2.7626E+15  | diacylglycerol O-acyltransferase activity   | Catalysis of the reaction: acyl-CoA + 1,2-diacylglycerol = CoA + triacylglycerol.                                                                                                 |
| GO:0004145 | 2 | 7  | 22861 | 5127  | 46173450 | 3.06198E+12 | 1.11026E+12 | 1.46358E+16 | 1.52471E+16 | 3.10278E+16 | diamine N-acetyltransferase activity        | Catalysis of the reaction: acetyl-CoA + an alkane-alpha,omega-diamine = CoA + an N-acetyldiamine.                                                                                 |
| GO:0004145 | 1 | 16 | 60795 | 5127  | 46173450 | 2.6318E+11  | 1.11026E+12 | 1.24516E+16 | 1.67386E+16 | 4.8809E+15  | diamine N-acetyltransferase activity        | Catalysis of the reaction: acetyl-CoA + an alkane-alpha,omega-diamine = CoA + an N-acetyldiamine.                                                                                 |
| GO:0004146 | 1 | 99 | 60795 | 36057 | 46142520 | 1.62842E+15 | 7.80817E+11 | 1.06042E+16 | 42679.75578 | 12323406.41 | dihydrofolate reductase activity            | Catalysis of the reaction: 5,6,7,8-tetrahydrofolate + NADP+ = 7,8-dihydrofolate + NADPH + H+.                                                                                     |
| GO:0004150 | 2 | 41 | 22861 | 39670 | 46138907 | 1.79345E+16 | 8.59056E+11 | 1.06191E+16 | 1.67609E+11 | 1.03447E+12 | dihydroneopterin aldolase activity          | Catalysis of the reaction: 2-amino-4-hydroxy-6-(D-erythro-1,2,3-trihydroxypropyl)-7,8-dihydropteridine = 2-amino-4-hydroxy-6-hydroxymethyl-7,8-dihydropteridine + glycolaldehyde. |
| GO:0004150 | 3 | 49 | 26855 | 39670 | 46138907 | 1.82461E+16 | 8.59056E+11 | 1.08677E+16 | 17378277299 | 1.5557E+11  | dihydroneopterin aldolase activity          | Catalysis of the reaction: 2-amino-4-hydroxy-6-(D-erythro-1,2,3-trihydroxypropyl)-7,8-dihydropteridine = 2-amino-4-hydroxy-6-hydroxymethyl-7,8-dihydropteridine + glycolaldehyde. |
| GO:0004152 | 2 | 32 | 22861 | 29920 | 46148657 | 1.39976E+15 | 6.47919E+11 | 1.1113E+16  | 7130131030  | 3.47173E+12 | dihydroorotate dehydrogenase activity       | Catalysis of the reaction: (S)-dihydroorotate + A = AH(2) + orotate.                                                                                                              |
| GO:0004152 | 3 | 43 | 26855 | 29920 | 46148657 | 1.60119E+16 | 6.47919E+11 | 1.30526E+16 | 1623639227  | 20132151250 | dihydroorotate dehydrogenase activity       | Catalysis of the reaction: (S)-dihydroorotate + A = AH(2) + orotate.                                                                                                              |
| GO:0004155 | 1 | 14 | 60795 | 962   | 46177615 | 2.30282E+12 | 2.08322E+11 | 3.46652E+16 | 88998.97782 | 24336210.56 | 6,7-dihydropteridine reductase activity     | Catalysis of the reaction: NADP+ + 5,6,7,8-tetrahydropteridine = NADPH + H+ + 6,7-dihydropteridine.                                                                               |
| GO:0004157 | 3 | 13 | 26855 | 9235  | 46169342 | 4.84081E+11 | 1.99985E+12 | 1.27536E+16 | 3.65276E+16 | 9.44704E+15 | dihydropyrimidinase activity                | Catalysis of the reaction: 5,6-dihydrouracil + H2O = 3-ureidopropionate.                                                                                                          |
| GO:0004157 | 2 | 13 | 22861 | 9235  | 46169342 | 5.68654E+11 | 1.99985E+12 | 1.50766E+16 | 9.2249E+11  | 2.93936E+16 | dihydropyrimidinase activity                | Catalysis of the reaction: 5,6-dihydrouracil + H2O = 3-ureidopropionate.                                                                                                          |
| GO:0004159 | 1 | 15 | 60795 | 3949  | 46174628 | 2.46731E+11 | 85515844284 | 1.52867E+15 | 3.34554E+12 | 1.23007E+16 | dihydrouracil dehydrogenase (NAD+) activity | Catalysis of the reaction: 5,6-dihydrouracil + NAD+ = uracil + NADH + H+.                                                                                                         |
| GO:0004159 | 3 | 11 | 26855 | 3949  | 46174628 | 4.09607E+12 | 85515844284 | 2.25998E+16 | 2.88026E+11 | 1.60278E+12 | dihydrouracil dehydrogenase (NAD+) activity | Catalysis of the reaction: 5,6-dihydrouracil + NAD+ = uracil + NADH + H+.                                                                                                         |
| GO:0004163 | 2 | 7  | 22861 | 4961  | 46173616 | 3.06198E+12 | 1.07431E+11 | 1.51106E+15 | 1.29714E+16 | 2.71571E+15 | diphosphomevalonate decarboxylase activity  | Catalysis of the reaction: (R)-5-diphosphomevalonate + ATP = ADP + CO(2) + H(+)                                                                                                   |
| GO:0004163 | 1 | 16 | 60795 | 4961  | 46173616 | 2.6318E+11  | 1.07431E+11 | 1.29264E+16 | 1.20588E+16 | 3.72407E+16 | diphosphomevalonate decarboxylase activity  | Catalysis of the reaction: (R)-5-diphosphomevalonate + ATP = ADP + CO(2) + H(+)                                                                                                   |
| GO:0004165 | 1 | 17 | 60795 | 4176  | 46174401 | 2.79628E+11 | 90431543614 | 1.62861E+15 | 61913129142 | 3.09491E+12 | dodecenoyl-CoA delta-isomerase activity     | Catalysis of the reaction: 3-cis-dodecenoyl-CoA = 2-trans-dodecenoyl-CoA.                                                                                                         |

|            |   |     |       |        |          |             |             |              |             |             |                                                           |                                                                                                                                                                                                                                                                     |
|------------|---|-----|-------|--------|----------|-------------|-------------|--------------|-------------|-------------|-----------------------------------------------------------|---------------------------------------------------------------------------------------------------------------------------------------------------------------------------------------------------------------------------------------------------------------------|
| GO:0004174 | 3 | 33  | 26855 | 16914  | 46161663 | 1.22882E+16 | 3.66274E+11 | 1.74628E+16  | 4878887.429 | 88744168.27 | electron-transferring-flavoprotein dehydrogenase activity | Catalysis of the reaction: reduced ETF + ubiquinone = ETF + ubiquinol.                                                                                                                                                                                              |
| GO:0004180 | 1 | 8   | 60795 | 12294  | 46166283 | 1.3159E+11  | 2.66227E+11 | -1.01661E+16 | 1.97955E+16 | 3.84458E+15 | carboxypeptidase activity                                 | Catalysis of the hydrolysis of the terminal or penultimate peptide bond at the C-terminal end of a peptide or polypeptide.                                                                                                                                          |
| GO:0004180 | 2 | 18  | 22861 | 12294  | 46166283 | 7.87367E+11 | 2.66227E+11 | 1.56438E+16  | 67358377063 | 3.31098E+12 | carboxypeptidase activity                                 | Catalysis of the hydrolysis of the terminal or penultimate peptide bond at the C-terminal end of a peptide or polypeptide.                                                                                                                                          |
| GO:0004197 | 2 | 6   | 22861 | 4106   | 46174471 | 2.62456E+11 | 88915689195 | 1.56156E+16  | 1.77401E+16 | 3.52959E+15 | cysteine-type endopeptidase activity                      | Catalysis of the hydrolysis of internal, alpha-peptide bonds in a polypeptide chain by a mechanism in which the sulfhydryl group of a cysteine residue at the active center acts as a nucleophile.                                                                  |
| GO:0004197 | 1 | 21  | 60795 | 4106   | 46174471 | 3.45423E+11 | 88915689195 | 1.95785E+16  | 2762032380  | 31503954964 | cysteine-type endopeptidase activity                      | Catalysis of the hydrolysis of internal, alpha-peptide bonds in a polypeptide chain by a mechanism in which the sulfhydryl group of a cysteine residue at the active center acts as a nucleophile.                                                                  |
| GO:0004222 | 3 | 23  | 26855 | 18183  | 46160394 | 8.56451E+11 | 3.93754E+11 | 1.12108E+15  | 6.20749E+11 | 2.05869E+15 | metalloendopeptidase activity                             | Catalysis of the hydrolysis of internal, alpha-peptide bonds in a polypeptide chain by a mechanism in which water acts as a nucleophile, one or two metal ions hold the water molecule in place, and charged amino acid side chains are ligands for the metal ions. |
| GO:0004300 | 3 | 139 | 26855 | 109003 | 46069574 | 5.17594E+15 | 2.36047E+16 | 1.13275E+16  | 0.148015396 | 145.5132313 | enoyl-CoA hydratase activity                              | Catalysis of the reaction: (3S)-3-hydroxyacyl-CoA = trans-2-enoyl-CoA + H2O.                                                                                                                                                                                        |
| GO:0004311 | 3 | 11  | 26855 | 42184  | 46136393 | 4.09607E+12 | 9.13497E+11 | -1.15716E+16 | 1.84867E+16 | 5.34536E+15 | farnesyltransferase activity                              | Catalysis of the reaction: 2-trans,6-trans-farnesyl diphosphate + isopentenyl diphosphate = diphosphate + geranylgeranyl diphosphate.                                                                                                                               |
| GO:0004315 | 1 | 55  | 60795 | 18027  | 46160550 | 9.0468E+11  | 3.90376E+11 | 1.21254E+16  | 284433880.5 | 4398604841  | 3-oxoacyl-[acyl-carrier-protein] synthase activity        | Catalysis of the reaction: acyl-[acyl-carrier protein] + malonyl-[acyl-carrier protein] = 3-oxoacyl-[acyl-carrier protein] + CO2 + [acyl-carrier protein].                                                                                                          |
| GO:0004315 | 3 | 24  | 26855 | 18027  | 46160550 | 8.93688E+11 | 3.90376E+11 | 1.19491E+15  | 2.3519E+12  | 9.196E+11   | 3-oxoacyl-[acyl-carrier-protein] synthase activity        | Catalysis of the reaction: acyl-[acyl-carrier protein] + malonyl-[acyl-carrier protein] = 3-oxoacyl-[acyl-carrier protein] + CO2 + [acyl-carrier protein].                                                                                                          |
| GO:0004322 | 3 | 47  | 26855 | 35559  | 46143018 | 1.75014E+16 | 77003238969 | 1.18448E+16  | 4644093386  | 4861122788  | ferroxidase activity                                      | Catalysis of the reaction: 4 Fe2+ + 4 H+ + O2 = 4 Fe3+ + 2 H2O.                                                                                                                                                                                                     |
| GO:0004325 | 3 | 47  | 26855 | 39928  | 46138649 | 1.75014E+16 | 8.64643E+11 | 1.01729E+16  | 935538665.5 | 63848580991 | ferrochelataase activity                                  | Catalysis of the reaction: protoheme = Fe(2+) + protoporphyrin IX.                                                                                                                                                                                                  |
| GO:0004328 | 2 | 5   | 22861 | 1931   | 46176646 | 2.18713E+12 | 41815926896 | 2.38692E+15  | 3.01728E+16 | 8.05845E+15 | formamidase activity                                      | Catalysis of the reaction: formamide + H(2)O = formate + NH(4)(+).                                                                                                                                                                                                  |
| GO:0004329 | 1 | 59  | 60795 | 16640  | 46161937 | 9.70475E+11 | 3.6034E+11  | 1.42933E+15  | 407962.8184 | 12097933.38 | formate-tetrahydrofolate ligase activity                  | Catalysis of the reaction: ATP + formate + tetrahydrofolate = ADP + phosphate + 10-formyltetrahydrofolate.                                                                                                                                                          |
| GO:0004334 | 2 | 24  | 22861 | 20670  | 46157907 | 1.04982E+16 | 4.4761E+12  | 1.22983E+16  | 1.66348E+12 | 68822567833 | fumarylacetoacetase activity                              | Catalysis of the reaction: 4-fumarylacetoacetate + H(2)O = acetoacetate + fumarate + H(+).                                                                                                                                                                          |

|            |   |     |       |        |          |             |             |              |             |             |                                            |                                                                                                                                                                           |
|------------|---|-----|-------|--------|----------|-------------|-------------|--------------|-------------|-------------|--------------------------------------------|---------------------------------------------------------------------------------------------------------------------------------------------------------------------------|
| GO:0004334 | 3 | 42  | 26855 | 20670  | 46157907 | 1.56395E+16 | 4.4761E+12  | 1.80488E+16  | 129807.7518 | 4322388.767 | fumarylacetoacetase activity               | Catalysis of the reaction: 4-fumarylacetoacetate + H(2)O = acetoacetate + fumarate + H(+).                                                                                |
| GO:0004335 | 3 | 4   | 26855 | 22552  | 46156025 | 1.48948E+12 | 4.88365E+11 | -1.71315E+16 | 3.43066E+16 | 8.98236E+14 | galactokinase activity                     | Catalysis of the reaction: D-galactose + ATP = alpha-D-galactose 1-phosphate + ADP + 2 H(+).                                                                              |
| GO:0004342 | 1 | 80  | 60795 | 23897  | 46154680 | 1.3159E+16  | 5.17491E+11 | 1.34644E+15  | 305.837273  | 14856.4953  | glucosamine-6-phosphate deaminase activity | Catalysis of the reaction: D-glucosamine 6-phosphate + H(2)O = beta-D-fructose 6-phosphate + NH(4)(+).                                                                    |
| GO:0004342 | 3 | 4   | 26855 | 23897  | 46154680 | 1.48948E+12 | 5.17491E+11 | -1.79672E+16 | 1.93941E+15 | 5.55713E+15 | glucosamine-6-phosphate deaminase activity | Catalysis of the reaction: D-glucosamine 6-phosphate + H(2)O = beta-D-fructose 6-phosphate + NH(4)(+).                                                                    |
| GO:0004348 | 1 | 18  | 60795 | 6420   | 46172157 | 2.96077E+12 | 1.39026E+11 | 1.09062E+15  | 2.812E+16   | 7.59367E+15 | glucosylceramidase activity                | Catalysis of the reaction: D-glucosyl-N-acylsphingosine + H2O = D-glucose + N-acylsphingosine.                                                                            |
| GO:0004354 | 1 | 61  | 60795 | 16758  | 46161819 | 1.00337E+16 | 3.62896E+11 | 1.46723E+16  | 69150.84626 | 25722.86885 | glutamate dehydrogenase (NADP+) activity   | Catalysis of the reaction: L-glutamate + H2O + NADP+ = 2-oxoglutarate + NH3 + NADPH + H+.                                                                                 |
| GO:0004356 | 3 | 125 | 26855 | 97856  | 46080721 | 4.65463E+15 | 2.11908E+15 | 1.13523E+16  | 4.148642248 | 285.4957307 | glutamate-ammonia ligase activity          | Catalysis of the reaction: L-glutamate + ATP + NH(3) = L-glutamine + ADP + 2 H(+)+ phosphate.                                                                             |
| GO:0004357 | 3 | 37  | 26855 | 21778  | 46156799 | 1.37777E+16 | 4.71604E+11 | 1.54669E+16  | 209038955.8 | 3358450772  | glutamate-cysteine ligase activity         | Catalysis of the reaction: L-cysteine + L-glutamate + ATP = L-gamma-glutamyl-L-cysteine + ADP + 2 H(+)+ phosphate.                                                        |
| GO:0004359 | 1 | 25  | 60795 | 7607   | 46170970 | 4.11218E+11 | 1.6473E+12  | 1.3198E+16   | 47272015734 | 2.46136E+11 | glutaminase activity                       | Catalysis of the reaction: L-glutamine + H2O = L-glutamate + NH3.                                                                                                         |
| GO:0004359 | 3 | 16  | 26855 | 7607   | 46170970 | 5.95792E+11 | 1.6473E+12  | 1.85471E+16  | 16384637530 | 1.02503E+12 | glutaminase activity                       | Catalysis of the reaction: L-glutamine + H2O = L-glutamate + NH3.                                                                                                         |
| GO:0004361 | 2 | 28  | 22861 | 21742  | 46156835 | 1.22479E+16 | 4.70824E+11 | 1.37928E+15  | 8458011494  | 58497704288 | glutaryl-CoA dehydrogenase activity        | Catalysis of the reaction: glutaryl-CoA + acceptor = crotonoyl-CoA + CO2 + reduced acceptor.                                                                              |
| GO:0004361 | 3 | 26  | 26855 | 21742  | 46156835 | 96816235338 | 4.70824E+11 | 1.04006E+16  | 6.50178E+11 | 2.14767E+16 | glutaryl-CoA dehydrogenase activity        | Catalysis of the reaction: glutaryl-CoA + acceptor = crotonoyl-CoA + CO2 + reduced acceptor.                                                                              |
| GO:0004362 | 3 | 24  | 26855 | 12548  | 46166029 | 8.93688E+11 | 2.71728E+11 | 1.71761E+16  | 784131828.8 | 7820483867  | glutathione-disulfide reductase activity   | Catalysis of the reaction: 2 glutathione + NADP+ = glutathione disulfide + NADPH + H+.                                                                                    |
| GO:0004363 | 3 | 29  | 26855 | 20287  | 46158290 | 1.07987E+16 | 4.39316E+12 | 1.29753E+16  | 1.6529E+11  | 1.03094E+12 | glutathione synthase activity              | Catalysis of the reaction: L-gamma-glutamyl-L-cysteine + ATP + glycine = ADP + glutathione + 2 H(+)+ phosphate.                                                           |
| GO:0004364 | 3 | 208 | 26855 | 103861 | 46074716 | 7.7453E+15  | 2.24912E+15 | 1.78396E+16  | 5.86435E-35 | 1.2107E-30  | glutathione transferase activity           | Catalysis of the reaction: R-X + glutathione = H-X + R-S-glutathione. R may be an aliphatic, aromatic or heterocyclic group; X may be a sulfate, nitrile or halide group. |
| GO:0004369 | 1 | 5   | 60795 | 160    | 46178417 | 82243605560 | 34648101001 | 4.56906E+15  | 2737641172  | 2.26982E+11 | glycerol-3-phosphate oxidase activity      | Catalysis of the reaction: sn-glycerol 3-phosphate + O(2) = glycerone phosphate + H(2)O(2).                                                                               |
| GO:0004371 | 2 | 6   | 22861 | 2202   | 46176375 | 2.62456E+11 | 4.76844E+11 | 2.46048E+15  | 9.19893E+11 | 2.93754E+15 | glycerone kinase activity                  | Catalysis of the reaction: ATP + glycerone = ADP + glycerone phosphate + 2 H(+).                                                                                          |
| GO:0004371 | 1 | 9   | 60795 | 2202   | 46176375 | 1.48038E+12 | 4.76844E+11 | 1.63438E+16  | 3.02718E+16 | 8.07443E+15 | glycerone kinase activity                  | Catalysis of the reaction: ATP + glycerone = ADP + glycerone phosphate + 2 H(+).                                                                                          |
| GO:0004383 | 2 | 1   | 22861 | 36     | 46178541 | 4.37426E+11 | 779582272.5 | 5.81019E+15  | 1.76685E+16 | 3.52091E+15 | guanylate cyclase activity                 | Catalysis of the reaction: GTP = 3',5'-cyclic GMP + diphosphate.                                                                                                          |

|            |   |    |       |       |          |             |             |             |             |             |                                                  |                                                                                                                             |
|------------|---|----|-------|-------|----------|-------------|-------------|-------------|-------------|-------------|--------------------------------------------------|-----------------------------------------------------------------------------------------------------------------------------|
| GO:0004397 | 2 | 26 | 22861 | 24820 | 46153757 | 1.13731E+16 | 5.37479E+11 | 1.08134E+16 | 4.31437E+12 | 1.52519E+16 | histidine ammonia-lyase activity                 | Catalysis of the reaction: L-histidine = urocanate + NH3.                                                                   |
| GO:0004397 | 1 | 66 | 60795 | 24820 | 46153757 | 1.08562E+15 | 5.37479E+11 | 1.01423E+16 | 1921802014  | 2320210678  | histidine ammonia-lyase activity                 | Catalysis of the reaction: L-histidine = urocanate + NH3.                                                                   |
| GO:0004401 | 1 | 81 | 60795 | 24659 | 46153918 | 1.33235E+16 | 5.33992E+11 | 1.31908E+16 | 561.3037403 | 254683.862  | histidinol-phosphatase activity                  | Catalysis of the reaction: L-histidinol phosphate + H(2)O = L-histidinol + phosphate.                                       |
| GO:0004401 | 2 | 28 | 22861 | 24659 | 46153918 | 1.22479E+16 | 5.33992E+11 | 1.19765E+15 | 73424015269 | 3.55414E+12 | histidinol-phosphatase activity                  | Catalysis of the reaction: L-histidinol phosphate + H(2)O = L-histidinol + phosphate.                                       |
| GO:0004410 | 3 | 15 | 26855 | 4077  | 46174500 | 5.58555E+11 | 88287692364 | 2.66142E+15 | 34470786.07 | 523271601.8 | homocitrate synthase activity                    | Catalysis of the reaction: 2-oxoglutarate + acetyl-CoA + H(2)O = CoA + H(+) + homocitrate.                                  |
| GO:0004414 | 3 | 38 | 26855 | 30316 | 46148261 | 1.41501E+16 | 6.56495E+11 | 1.10795E+16 | 1.70182E+11 | 1.04722E+12 | homoserine O-acetyltransferase activity          | Catalysis of the reaction: L-homoserine + acetyl-CoA = O-acetyl-L-homoserine + CoA.                                         |
| GO:0004416 | 3 | 32 | 26855 | 23435 | 46155142 | 1.19158E+16 | 5.07486E+11 | 1.23144E+16 | 1.52515E+11 | 97331713575 | hydroxyacylglutathione hydrolase activity        | Catalysis of the reaction: (S)-(2-hydroxyacyl)glutathione + H2O = glutathione + a 2-hydroxy carboxylate.                    |
| GO:0004417 | 1 | 42 | 60795 | 7007  | 46171570 | 69084628670 | 1.51737E+12 | 2.18679E+16 | 2.76746623  | 197.0149666 | hydroxyethylthiazole kinase activity             | Catalysis of the reaction: 5-(2-hydroxyethyl)-4-methylthiazole + ATP = 4-methyl-5-(2-phosphoethyl)-thiazole + ADP + 2 H(+). |
| GO:0004419 | 2 | 31 | 22861 | 27021 | 46151556 | 1.35602E+16 | 5.85141E+11 | 1.21252E+16 | 2.6071E+11  | 1.47462E+11 | hydroxymethylglutaryl-CoA lyase activity         | Catalysis of the reaction: (S)-3-hydroxy-3-methylglutaryl-CoA = acetoacetate + acetyl-CoA.                                  |
| GO:0004419 | 3 | 34 | 26855 | 27021 | 46151556 | 1.26606E+16 | 5.85141E+11 | 1.11349E+16 | 4.22131E+11 | 2.22319E+12 | hydroxymethylglutaryl-CoA lyase activity         | Catalysis of the reaction: (S)-3-hydroxy-3-methylglutaryl-CoA = acetoacetate + acetyl-CoA.                                  |
| GO:0004451 | 3 | 20 | 26855 | 15002 | 46163575 | 7.4474E+11  | 3.24869E+11 | 1.19688E+16 | 7.26833E+11 | 2.37616E+15 | isocitrate lyase activity                        | Catalysis of the reaction: isocitrate = glyoxylate + succinate.                                                             |
| GO:0004452 | 2 | 20 | 22861 | 13974 | 46164603 | 8.74852E+11 | 3.02608E+12 | 1.53159E+16 | 37506680332 | 2.0191E+11  | isopentenyl-diphosphate delta-isomerase activity | Catalysis of the reaction: isopentenyl diphosphate = dimethylallyl diphosphate.                                             |
| GO:0004452 | 1 | 40 | 60795 | 13974 | 46164603 | 6.57949E+11 | 3.02608E+12 | 1.12053E+15 | 8553556552  | 5905959031  | isopentenyl-diphosphate delta-isomerase activity | Catalysis of the reaction: isopentenyl diphosphate = dimethylallyl diphosphate.                                             |
| GO:0004456 | 1 | 28 | 60795 | 9279  | 46169298 | 4.60564E+12 | 2.00937E+12 | 1.19666E+16 | 73898894747 | 3.57293E+11 | phosphogluconate dehydratase activity            | Catalysis of the reaction: 6-phospho-D-gluconate = 2-dehydro-3-deoxy-6-phospho-D-gluconate + H(2)O.                         |
| GO:0004456 | 3 | 19 | 26855 | 9279  | 46169298 | 7.07503E+11 | 2.00937E+12 | 1.81599E+16 | 4068257544  | 3.17539E+11 | phosphogluconate dehydratase activity            | Catalysis of the reaction: 6-phospho-D-gluconate = 2-dehydro-3-deoxy-6-phospho-D-gluconate + H(2)O.                         |
| GO:0004456 | 2 | 10 | 22861 | 9279  | 46169298 | 4.37426E+11 | 2.00937E+12 | 1.12229E+16 | 1.9326E+15  | 3.77599E+15 | phosphogluconate dehydratase activity            | Catalysis of the reaction: 6-phospho-D-gluconate = 2-dehydro-3-deoxy-6-phospho-D-gluconate + H(2)O.                         |
| GO:0004458 | 3 | 21 | 26855 | 9566  | 46169011 | 7.81977E+11 | 2.07152E+12 | 1.91643E+16 | 441383870.1 | 4673010256  | D-lactate dehydrogenase (cytochrome) activity    | Catalysis of the reaction: (R)-lactate + 2 ferricytochrome c = pyruvate + 2 ferrocyclochrome c.                             |
| GO:0004458 | 2 | 11 | 22861 | 9566  | 46169011 | 4.81169E+11 | 2.07152E+12 | 1.21585E+16 | 9.47733E+14 | 2.09968E+16 | D-lactate dehydrogenase (cytochrome) activity    | Catalysis of the reaction: (R)-lactate + 2 ferricytochrome c = pyruvate + 2 ferrocyclochrome c.                             |
| GO:0004460 | 2 | 23 | 22861 | 13463 | 46165114 | 1.00608E+16 | 2.91542E+11 | 1.78697E+16 | 592369018.5 | 5980175250  | L-lactate dehydrogenase (cytochrome) activity    | Catalysis of the reaction: (S)-lactate + 2 ferricytochrome c = pyruvate + 2 ferrocyclochrome c.                             |
| GO:0004460 | 1 | 37 | 60795 | 13463 | 46165114 | 6.08603E+11 | 2.91542E+11 | 1.0618E+16  | 4.15672E+11 | 2.19758E+12 | L-lactate dehydrogenase (cytochrome) activity    | Catalysis of the reaction: (S)-lactate + 2 ferricytochrome c = pyruvate + 2 ferrocyclochrome c.                             |

|            |   |    |       |       |          |             |             |             |             |             |                                                                |                                                                                                                          |
|------------|---|----|-------|-------|----------|-------------|-------------|-------------|-------------|-------------|----------------------------------------------------------------|--------------------------------------------------------------------------------------------------------------------------|
| GO:0004460 | 3 | 22 | 26855 | 13463 | 46165114 | 8.19214E+11 | 2.91542E+11 | 1.49054E+16 | 24134535763 | 1.38999E+12 | L-lactate dehydrogenase (cytochrome) activity                  | Catalysis of the reaction: (S)-lactate + 2 ferricytochrome c = pyruvate + 2 ferrocytochrome c.                           |
| GO:0004462 | 3 | 58 | 26855 | 40160 | 46138417 | 2.15975E+16 | 8.69667E+11 | 1.31233E+16 | 1126513.429 | 24480915.52 | lactoylglutathione lyase activity                              | Catalysis of the reaction: (R)-S-lactoylglutathione = glutathione + methylglyoxal.                                       |
| GO:0004466 | 1 | 12 | 60795 | 1552  | 46177025 | 1.97385E+12 | 33608657971 | 2.5541E+15  | 16454711724 | 1.48812E+11 | long-chain-acyl-CoA dehydrogenase activity                     | Catalysis of the reaction: acyl-CoA + ETF = 2,3-dehydroacyl-CoA + reduced ETF.                                           |
| GO:0004466 | 2 | 4  | 22861 | 1552  | 46177025 | 1.7497E+12  | 33608657971 | 2.38021E+15 | 7.89707E+15 | 1.81655E+16 | long-chain-acyl-CoA dehydrogenase activity                     | Catalysis of the reaction: acyl-CoA + ETF = 2,3-dehydroacyl-CoA + reduced ETF.                                           |
| GO:0004471 | 1 | 64 | 60795 | 18484 | 46160093 | 1.05272E+16 | 4.00272E+12 | 1.39507E+15 | 167518.7943 | 54895.643   | malate dehydrogenase (decarboxylating) (NAD+) activity         | Catalysis of the reaction: (S)-malate + NAD+ = pyruvate + CO2 + NADH + H+.                                               |
| GO:0004473 | 3 | 48 | 26855 | 32281 | 46146296 | 1.78738E+16 | 6.99047E+11 | 1.35438E+16 | 119344633.6 | 204470536.1 | malate dehydrogenase (decarboxylating) (NADP+) activity        | Catalysis of the reaction: (S)-malate + NADP+ = pyruvate + CO2 + NADPH + H+.                                             |
| GO:0004474 | 2 | 22 | 22861 | 21556 | 46157021 | 96233760553 | 4.66797E+12 | 1.04375E+16 | 1.558E+16   | 4.59827E+16 | malate synthase activity                                       | Catalysis of the reaction: acetyl-CoA + glyoxylate + H(2)O = (S)-malate + CoA + H(+).                                    |
| GO:0004474 | 3 | 28 | 26855 | 21556 | 46157021 | 1.04264E+15 | 4.66797E+12 | 1.15937E+16 | 1.13266E+12 | 5.0126E+11  | malate synthase activity                                       | Catalysis of the reaction: acetyl-CoA + glyoxylate + H(2)O = (S)-malate + CoA + H(+).                                    |
| GO:0004485 | 3 | 61 | 26855 | 29062 | 46149515 | 2.27146E+15 | 62933944457 | 1.85171E+16 | 0.092143095 | 9.511470935 | methylcrotonoyl-CoA carboxylase activity                       | Catalysis of the reaction: 3-methylbut-2-enoyl-CoA + ATP + bicarbonate = trans-3-methylglutaconyl-CoA + ADP + 2 H(+)     |
| GO:0004490 | 3 | 29 | 26855 | 21749 | 46156828 | 1.07987E+16 | 4.70976E+12 | 1.19714E+16 | 5.56654E+11 | 2.82709E+11 | methylglutaconyl-CoA hydratase activity                        | Catalysis of the reaction: (S)-3-hydroxy-3-methylglutaryl-CoA = trans-3-methylglutaconyl-CoA + H(2)O.                    |
| GO:0004491 | 2 | 25 | 22861 | 22323 | 46156254 | 1.09357E+16 | 4.83406E+11 | 1.17773E+14 | 2.10912E+12 | 8.36559E+11 | methylmalonate-semialdehyde dehydrogenase (acylating) activity | Catalysis of the reaction: 2-methyl-3-oxopropanoate + CoA + NAD+ = propanoyl-CoA + CO2 + NADH + H+.                      |
| GO:0004491 | 3 | 37 | 26855 | 22323 | 46156254 | 1.37777E+16 | 4.83406E+11 | 1.51103E+16 | 384978068.8 | 580136659.2 | methylmalonate-semialdehyde dehydrogenase (acylating) activity | Catalysis of the reaction: 2-methyl-3-oxopropanoate + CoA + NAD+ = propanoyl-CoA + CO2 + NADH + H+.                      |
| GO:0004496 | 2 | 7  | 22861 | 5292  | 46173285 | 3.06198E+12 | 1.14599E+11 | 1.41788E+16 | 1.77768E+15 | 3.53397E+15 | mevalonate kinase activity                                     | Catalysis of the reaction: (R)-mevalonate + ATP = (R)-5-phosphomevalonate + ADP + 2 H(+).                                |
| GO:0004496 | 1 | 16 | 60795 | 5292  | 46173285 | 2.6318E+11  | 1.14599E+11 | 1.19946E+16 | 2.28116E+16 | 6.38137E+15 | mevalonate kinase activity                                     | Catalysis of the reaction: (R)-mevalonate + ATP = (R)-5-phosphomevalonate + ADP + 2 H(+).                                |
| GO:0004504 | 2 | 1  | 22861 | 38    | 46178539 | 4.37426E+11 | 822892398.8 | 5.73219E+15 | 1.86409E+16 | 3.67565E+15 | peptidylglycine monooxygenase activity                         | Catalysis of the reaction: peptidylglycine + ascorbate + O2 = peptidyl(2-hydroxyglycine) + dehydroascorbate + H2O.       |
| GO:0004505 | 3 | 19 | 26855 | 9609  | 46168968 | 7.07503E+11 | 2.08084E+12 | 1.76557E+16 | 661011310.8 | 4.77153E+11 | phenylalanine 4-monooxygenase activity                         | Catalysis of the reaction: L-phenylalanine + tetrahydrobiopterin + O2 = L-tyrosine + 4-alpha-hydroxytetrahydrobiopterin. |
| GO:0004530 | 1 | 10 | 60795 | 1145  | 46177432 | 1.64487E+12 | 2.4795E+11  | 2.72985E+16 | 4154137168  | 3.22195E+11 | deoxyribonuclease I activity                                   | Catalysis of the endonucleolytic cleavage of DNA to 5'-phosphodinucleotide and 5'-phosphooligonucleotide end products.   |
| GO:0004530 | 3 | 4  | 26855 | 1145  | 46177432 | 1.48948E+12 | 2.4795E+11  | 2.58669E+16 | 4.82015E+15 | 1.19678E+15 | deoxyribonuclease I activity                                   | Catalysis of the endonucleolytic cleavage of DNA to 5'-phosphodinucleotide and 5'-                                       |

|            |   |     |       |       |          |             |             |              |             |             |                                                        |                                                                                                                                                                   |
|------------|---|-----|-------|-------|----------|-------------|-------------|--------------|-------------|-------------|--------------------------------------------------------|-------------------------------------------------------------------------------------------------------------------------------------------------------------------|
| GO:0004555 | 1 | 18  | 60795 | 3064  | 46175513 | 2.96077E+12 | 66351113418 | 2.15778E+16  | 2710604150  | 3100300425  | alpha,alpha-trehalase activity                         | phosphooligonucleotide end products.                                                                                                                              |
| GO:0004555 | 2 | 5   | 22861 | 3064  | 46175513 | 2.18713E+12 | 66351113418 | 1.72085E+16  | 1.93466E+16 | 3.77599E+15 | alpha,alpha-trehalase activity                         | Catalysis of the reaction: alpha,alpha-trehalose + H2O = 2 D-glucose.                                                                                             |
| GO:0004558 | 1 | 107 | 60795 | 35681 | 46142896 | 1.76001E+16 | 7.72674E+11 | 1.18765E+16  | 40.8196145  | 2247.255844 | alpha-1,4-glucosidase activity                         | Catalysis of the reaction: alpha,alpha-trehalose + H2O = 2 D-glucose.                                                                                             |
| GO:0004560 | 3 | 9   | 26855 | 37214 | 46141363 | 3.35133E+12 | 8.05872E+11 | -1.26582E+16 | 1.86511E+15 | 5.38157E+15 | alpha-L-fucosidase activity                            | Catalysis of the hydrolysis of terminal, non-reducing alpha-(1->4)-linked alpha-D-glucose residues with release of alpha-D-glucose.                               |
| GO:0004560 | 1 | 107 | 60795 | 37214 | 46141363 | 1.76001E+16 | 8.05872E+11 | 1.12696E+16  | 508.7930543 | 233422.9468 | alpha-L-fucosidase activity                            | Catalysis of the reaction: an alpha-L-fucoside + H2O = an alcohol + L-fucose.                                                                                     |
| GO:0004561 | 1 | 5   | 60795 | 623   | 46177954 | 82243605560 | 1.34911E+11 | 2.6079E+16   | 1.55499E+16 | 4.59599E+15 | alpha-N-acetylglucosaminidase activity                 | Catalysis of the reaction: an alpha-L-fucoside + H2O = an alcohol + L-fucose.                                                                                     |
| GO:0004564 | 1 | 13  | 60795 | 3537  | 46175040 | 2.13833E+11 | 76593958276 | 1.48118E+16  | 1.0799E+16  | 3.37796E+16 | beta-fructofuranosidase activity                       | Catalysis of the hydrolysis of terminal non-reducing N-acetyl-D-glucosamine residues in N-acetyl-alpha-D-glucosaminides.                                          |
| GO:0004565 | 1 | 107 | 60795 | 36241 | 46142336 | 1.76001E+16 | 7.84801E+11 | 1.16519E+16  | 1048.728776 | 5481.267233 | beta-galactosidase activity                            | Catalysis of the reaction: a fructofuranosylated fructofuranosyl acceptor + H2O = a non fructofuranosylated fructofuranosyl acceptor + a beta-D-fructofuranoside. |
| GO:0004582 | 3 | 16  | 26855 | 56690 | 46121887 | 5.95792E+11 | 1.22763E+16 | -1.04299E+15 | 82453675204 | 2.66394E+15 | dolichyl-phosphate beta-D-mannosyltransferase activity | Catalysis of the hydrolysis of terminal, non-reducing beta-D-galactose residues in beta-D-galactosides.                                                           |
| GO:0004586 | 1 | 34  | 60795 | 11517 | 46167060 | 5.59257E+11 | 2.49401E+11 | 1.16504E+15  | 21056556361 | 1.25148E+12 | ornithine decarboxylase activity                       | Catalysis of the reaction: GDP-mannose + dolichyl phosphate = GDP + dolichyl D-mannosyl phosphate.                                                                |
| GO:0004586 | 3 | 27  | 26855 | 11517 | 46167060 | 1.0054E+15  | 2.49401E+11 | 2.01123E+16  | 28892988.16 | 57355359.67 | ornithine decarboxylase activity                       | Catalysis of the reaction: L-ornithine + H(+) = CO(2) + putrescine.                                                                                               |
| GO:0004587 | 2 | 17  | 22861 | 10385 | 46168192 | 7436245134  | 2.24888E+11 | 1.72537E+16  | 27725614812 | 1.54902E+11 | ornithine-oxo-acid transaminase activity               | Catalysis of the reaction: L-ornithine + H(+) = CO(2) + putrescine.                                                                                               |
| GO:0004589 | 3 | 5   | 26855 | 22167 | 46156410 | 1.86185E+11 | 4.80028E+12 | -1.36638E+16 | 1.14899E+15 | 2.45431E+16 | orotate reductase (NADH) activity                      | Catalysis of the reaction: L-ornithine + a 2-oxo acid = L-glutamate 5-semialdehyde + an L-amino acid.                                                             |
| GO:0004602 | 1 | 117 | 60795 | 37779 | 46140798 | 1.9245E+15  | 8.18107E+11 | 1.23412E+16  | 3.205203835 | 29.40952586 | glutathione peroxidase activity                        | Catalysis of the reaction: (S)-dihydroorotate + NAD(+) = H(+) + NADH + orotate.                                                                                   |
| GO:0004602 | 2 | 39  | 22861 | 37779 | 46140798 | 1.70596E+16 | 8.18107E+11 | 1.06022E+15  | 27067034285 | 1.52054E+12 | glutathione peroxidase activity                        | Catalysis of the reaction: 2 glutathione + hydrogen peroxide = oxidized glutathione + 2 H2O.                                                                      |
| GO:0004608 | 3 | 18  | 26855 | 6644  | 46171933 | 6.70266E+11 | 1.43876E+12 | 2.21991E+16  | 1484472251  | 18687152205 | phosphatidylethanolamine N-methyltransferase activity  | Catalysis of the reaction: 2 glutathione + hydrogen peroxide = oxidized glutathione + 2 H2O.                                                                      |
| GO:0004612 | 1 | 72  | 60795 | 20851 | 46157726 | 1.18431E+16 | 4.5153E+12  | 1.39115E+16  | 11026.77118 | 469376.6827 | phosphoenolpyruvate carboxykinase (ATP) activity       | Catalysis of the reaction: S-adenosyl-L-methionine + phosphatidylethanolamine = S-adenosyl-L-homocysteine + H(+) + phosphatidyl-N-methylethanolamine.             |
|            |   |     |       |       |          |             |             |              |             |             |                                                        | Catalysis of the reaction: ATP + oxaloacetate = ADP + CO(2) + H(+) + phosphoenolpyruvate.                                                                         |

|            |   |    |       |       |          |             |             |             |             |             |                                                              |                                                                                                                                   |
|------------|---|----|-------|-------|----------|-------------|-------------|-------------|-------------|-------------|--------------------------------------------------------------|-----------------------------------------------------------------------------------------------------------------------------------|
| GO:0004622 | 3 | 40 | 26855 | 30686 | 46147891 | 1.48948E+16 | 6.64507E+11 | 1.16445E+15 | 4309506266  | 33197670467 | lysophospholipase activity                                   | Catalysis of the reaction: 2-lysophosphatidylcholine + H2O = glycerophosphocholine + a carboxylate.                               |
| GO:0004623 | 1 | 17 | 60795 | 2886  | 46175691 | 2.79628E+11 | 62496512181 | 2.16166E+16 | 552827871.8 | 56084183851 | phospholipase A2 activity                                    | Catalysis of the reaction: phosphatidylcholine + H2O = 1-acylglycerophosphocholine + a carboxylate.                               |
| GO:0004623 | 3 | 8  | 26855 | 2886  | 46175691 | 2.97896E+11 | 62496512181 | 2.25296E+15 | 3.54217E+12 | 1.28662E+16 | phospholipase A2 activity                                    | Catalysis of the reaction: phosphatidylcholine + H2O = 1-acylglycerophosphocholine + a carboxylate.                               |
| GO:0004656 | 3 | 13 | 26855 | 3762  | 46174815 | 4.84081E+11 | 81466347480 | 2.57097E+15 | 551272684.5 | 56084183851 | procollagen-proline 4-dioxygenase activity                   | Catalysis of the reaction: procollagen L-proline + 2-oxoglutarate + O2 = procollagen trans-4-hydroxy-L-proline + succinate + CO2. |
| GO:0004656 | 2 | 7  | 22861 | 3762  | 46174815 | 3.06198E+12 | 81466347480 | 1.91019E+15 | 3.08262E+16 | 8.19658E+14 | procollagen-proline 4-dioxygenase activity                   | Catalysis of the reaction: procollagen L-proline + 2-oxoglutarate + O2 = procollagen trans-4-hydroxy-L-proline + succinate + CO2. |
| GO:0004658 | 2 | 61 | 22861 | 45860 | 46132717 | 2.6683E+15  | 9.93101E+11 | 1.42591E+16 | 214374.2688 | 686163.8418 | propionyl-CoA carboxylase activity                           | Catalysis of the reaction: ATP + propanoyl-CoA + HCO3- = ADP + phosphate + (S)-methylmalonyl-CoA.                                 |
| GO:0004754 | 3 | 11 | 26855 | 7240  | 46171337 | 4.09607E+12 | 1.56783E+12 | 1.38547E+16 | 4.12744E+15 | 1.05028E+16 | saccharopine dehydrogenase (NAD+, L-lysine-forming) activity | Catalysis of the reaction: L-saccharopine + H(2)O + NAD(+) = 2-oxoglutarate + L-lysine + H(+) + NADH.                             |
| GO:0004756 | 3 | 28 | 26855 | 23670 | 46154907 | 1.04264E+15 | 5.12575E+11 | 1.0244E+16  | 4.89323E+11 | 1.6879E+16  | selenide, water dikinase activity                            | Catalysis of the reaction: ATP + H(2)O + hydrogen selenide = AMP + 3 H(+) + phosphate + selenophosphate.                          |
| GO:0004767 | 3 | 1  | 26855 | 45    | 46178532 | 37237013592 | 974477840.7 | 5.25596E+15 | 2.58376E+16 | 4.77117E+15 | sphingomyelin phosphodiesterase activity                     | Catalysis of the reaction: H(2)O + sphingomyelin = ceramide + choline phosphate + H(+).                                           |
| GO:0004777 | 1 | 6  | 60795 | 528   | 46178049 | 98692326672 | 11433873330 | 3.10962E+16 | 84768472956 | 3.96237E+12 | succinate-semialdehyde dehydrogenase (NAD+) activity         | Catalysis of the reaction: succinate semialdehyde + NAD+ + H2O = succinate + NADH + H+.                                           |
| GO:0004783 | 3 | 53 | 26855 | 40103 | 46138474 | 1.97356E+15 | 86843299654 | 1.18432E+16 | 91506587.32 | 1242864142  | sulfite reductase (NADPH) activity                           | Catalysis of the reaction: hydrogen sulfide + 3 NADP+ + 3 H2O = sulfite + 3 NADPH + 3 H+.                                         |
| GO:0004788 | 1 | 52 | 60795 | 9497  | 46169080 | 8.55333E+11 | 2.05658E+12 | 2.05624E+16 | 0.060755346 | 6.432277512 | thiamine diphosphokinase activity                            | Catalysis of the reaction: ATP + thiamine = AMP + thiamine diphosphate.                                                           |
| GO:0004792 | 3 | 48 | 26855 | 40127 | 46138450 | 1.78738E+16 | 86895271805 | 1.04049E+16 | 5043578172  | 38165131411 | thiosulfate sulfurtransferase activity                       | Catalysis of the reaction: hydrogen cyanide + thiosulfate = H(+) + sulfite + thiocyanate.                                         |
| GO:0004794 | 3 | 85 | 26855 | 70082 | 46108495 | 3.16515E+15 | 1.51763E+16 | 1.06045E+14 | 932412.7317 | 20923544.4  | L-threonine ammonia-lyase activity                           | Catalysis of the reaction: L-threonine = 2-oxobutanoate + NH3.                                                                    |
| GO:0004797 | 1 | 82 | 60795 | 20612 | 46157965 | 1.3488E+15  | 4.46354E+11 | 1.59541E+15 | 0.164977654 | 2.064220404 | thymidine kinase activity                                    | Catalysis of the reaction: ATP + thymidine = ADP + thymidine 5'-phosphate.                                                        |
| GO:0004797 | 2 | 26 | 22861 | 20612 | 46157965 | 1.13731E+16 | 4.46354E+11 | 1.34936E+16 | 2.43825E+11 | 1.40216E+11 | thymidine kinase activity                                    | Catalysis of the reaction: ATP + thymidine = ADP + thymidine 5'-phosphate.                                                        |
| GO:0004799 | 2 | 36 | 22861 | 35537 | 46143040 | 1.57473E+16 | 76955597831 | 1.03301E+16 | 77231601012 | 3.69941E+12 | thymidylate synthase activity                                | Catalysis of the reaction: 5,10-methylenetetrahydrofolate + dUMP = 7,8-dihydrofolate + thymidylate.                               |
| GO:0004806 | 1 | 20 | 60795 | 6763  | 46171814 | 3.28974E+12 | 1.46453E+12 | 1.16754E+16 | 9.21688E+11 | 2.93936E+16 | triglyceride lipase activity                                 | Catalysis of the reaction: triacylglycerol + H2O = diacylglycerol + a carboxylate.                                                |

|            |   |     |       |       |          |             |             |              |             |             |                                                                       |                                                                                                                                                                                     |
|------------|---|-----|-------|-------|----------|-------------|-------------|--------------|-------------|-------------|-----------------------------------------------------------------------|-------------------------------------------------------------------------------------------------------------------------------------------------------------------------------------|
| GO:0004806 | 3 | 9   | 26855 | 6763  | 46171814 | 3.35133E+12 | 1.46453E+12 | 1.19429E+16  | 1.93938E+16 | 3.77776E+15 | triglyceride lipase activity                                          | Catalysis of the reaction: triacylglycerol + H2O = diacylglycerol + a carboxylate.                                                                                                  |
| GO:0004808 | 3 | 17  | 26855 | 7248  | 46171329 | 6.33029E+11 | 1.56956E+12 | 2.01191E+16  | 22284598449 | 19010972520 | tRNA (5-methylaminomethyl-2-thiouridylate)-methyltransferase activity | Catalysis of the reaction: S-adenosyl-L-methionine + tRNA containing 5-aminomethyl-2-thiouridine = S-adenosyl-L-homocysteine + tRNA containing 5-methylaminomethyl-2-thiouridylate. |
| GO:0004816 | 1 | 69  | 60795 | 25052 | 46153525 | 1.13496E+16 | 5.42503E+11 | 1.06494E+16  | 288379363.6 | 442672427.1 | asparagine-tRNA ligase activity                                       | Catalysis of the reaction: L-asparagine + ATP + tRNA(Asn) = AMP + Asn-tRNA(Asn) + diphosphate + 2 H(+).                                                                             |
| GO:0004816 | 3 | 3   | 26855 | 25052 | 46153525 | 1.11711E+12 | 5.42503E+11 | -2.27986E+15 | 2.98339E+11 | 1.12292E+15 | asparagine-tRNA ligase activity                                       | Catalysis of the reaction: L-asparagine + ATP + tRNA(Asn) = AMP + Asn-tRNA(Asn) + diphosphate + 2 H(+).                                                                             |
| GO:0004847 | 1 | 16  | 60795 | 3353  | 46175224 | 2.6318E+11  | 72609426661 | 1.85782E+15  | 1.58215E+11 | 1.00468E+12 | urea carboxylase activity                                             | Catalysis of the reaction: ATP + bicarbonate + urea = ADP + 2 H(+) + phosphate + urea-1-carboxylate.                                                                                |
| GO:0004849 | 1 | 66  | 60795 | 19958 | 46158619 | 1.08562E+15 | 4.32192E+11 | 1.32877E+15  | 541975.3511 | 15433215.34 | uridine kinase activity                                               | Catalysis of the reaction: ATP + uridine = ADP + UMP.                                                                                                                               |
| GO:0004849 | 3 | 4   | 26855 | 19958 | 46158619 | 1.48948E+12 | 4.32192E+11 | -1.53686E+16 | 9.96049E+15 | 2.18411E+15 | uridine kinase activity                                               | Catalysis of the reaction: ATP + uridine = ADP + UMP.                                                                                                                               |
| GO:0004850 | 2 | 10  | 22861 | 6645  | 46171932 | 4.37426E+11 | 1.43898E+12 | 1.60399E+16  | 2.13771E+16 | 6.01964E+15 | uridine phosphorylase activity                                        | Catalysis of the reaction: uridine + phosphate = uracil + alpha-D-ribose 1-phosphate.                                                                                               |
| GO:0004850 | 1 | 32  | 60795 | 6645  | 46171932 | 5.26359E+11 | 1.43898E+12 | 1.871E+16    | 1084222.985 | 238125356.6 | uridine phosphorylase activity                                        | Catalysis of the reaction: uridine + phosphate = uracil + alpha-D-ribose 1-phosphate.                                                                                               |
| GO:0008106 | 1 | 3   | 60795 | 272   | 46178305 | 49346163336 | 5890177170  | 3.06655E+16  | 5.8163E+15  | 1.40196E+16 | alcohol dehydrogenase (NADP+) activity                                | Catalysis of the reaction: an alcohol + NADP+ = an aldehyde + NADPH + H+.                                                                                                           |
| GO:0008108 | 3 | 2   | 26855 | 18934 | 46159643 | 74474027183 | 4.10017E+12 | -2.46087E+15 | 1.19533E+16 | 3.6998E+15  | UDP-glucose:hexose-1-phosphate uridylyltransferase activity           | Catalysis of the reaction: alpha-D-galactose 1-phosphate + UDP-D-glucose = alpha-D-glucose 1-phosphate + UDP-D-galactose.                                                           |
| GO:0008111 | 2 | 9   | 22861 | 6450  | 46172127 | 3.93684E+12 | 1.39675E+12 | 1.49496E+16  | 5.62122E+15 | 1.36289E+16 | alpha-methylacyl-CoA racemase activity                                | Catalysis of the reaction: (2S)-2-methylacyl-CoA = (2R)-2-methylacyl-CoA.                                                                                                           |
| GO:0008115 | 2 | 39  | 22861 | 38957 | 46139620 | 1.70596E+16 | 8.43616E+11 | 1.01593E+16  | 51388474421 | 2.64238E+11 | sarcosine oxidase activity                                            | Catalysis of the reaction: H(2)O + O(2) + sarcosine = formaldehyde + glycine + H(2)O(2).                                                                                            |
| GO:0008115 | 1 | 108 | 60795 | 38957 | 46139620 | 1.77646E+15 | 8.43616E+11 | 1.07435E+16  | 33816.43059 | 1342577.326 | sarcosine oxidase activity                                            | Catalysis of the reaction: H(2)O + O(2) + sarcosine = formaldehyde + glycine + H(2)O(2).                                                                                            |
| GO:0008115 | 3 | 62  | 26855 | 38957 | 46139620 | 2.30869E+16 | 8.43616E+11 | 1.45242E+16  | 714.748667  | 263499.7541 | sarcosine oxidase activity                                            | Catalysis of the reaction: H(2)O + O(2) + sarcosine = formaldehyde + glycine + H(2)O(2).                                                                                            |
| GO:0008119 | 3 | 5   | 26855 | 2587  | 46175990 | 1.86185E+11 | 56021648307 | 1.73268E+16  | 1.8749E+15  | 3.69517E+15 | thiopurine S-methyltransferase activity                               | Catalysis of the reaction: S-adenosyl-L-methionine + a thiopurine = S-adenosyl-L-homocysteine + a thiopurine S-methylether.                                                         |
| GO:0008121 | 3 | 40  | 26855 | 16094 | 46162483 | 1.48948E+16 | 3.48517E+12 | 2.09551E+16  | 92.34480225 | 4961.356058 | ubiquinol-cytochrome-c reductase activity                             | Enables the transfer of a solute or solutes from one side of a membrane to the other according to the reaction: CoQH2 + 2 ferricytochrome c = CoQ + 2 ferrocytochrome c + 2 H+.     |
| GO:0008195 | 1 | 14  | 60795 | 822   | 46177755 | 2.30282E+12 | 1.78005E+11 | 3.69342E+16  | 114928.4654 | 3982716.404 | phosphatidate phosphatase activity                                    | Catalysis of the reaction: a 1,2-diacylglycerol 3-phosphate + H2O = a 1,2-diacyl-sn-glycerol + phosphate.                                                                           |



|            |   |     |       |       |          |             |             |             |             |             |                                                                             |                                                                                                                                 |
|------------|---|-----|-------|-------|----------|-------------|-------------|-------------|-------------|-------------|-----------------------------------------------------------------------------|---------------------------------------------------------------------------------------------------------------------------------|
| GO:0008239 | 1 | 13  | 60795 | 3285  | 46175292 | 2.13833E+11 | 71136882369 | 1.58782E+16 | 5.56543E+11 | 1.89601E+16 | dipeptidyl-peptidase activity                                               | Catalysis of the hydrolysis of N-terminal dipeptides from a polypeptide chain.                                                  |
| GO:0008254 | 1 | 29  | 60795 | 5694  | 46172883 | 4.77013E+12 | 1.23304E+12 | 1.95181E+16 | 18751950.81 | 383301014.3 | 3'-nucleotidase activity                                                    | Catalysis of the reaction: a 3'-ribonucleotide + H <sub>2</sub> O = a ribonucleoside + phosphate.                               |
| GO:0008260 | 2 | 56  | 22861 | 33884 | 46144693 | 2.44959E+15 | 7.3376E+11  | 1.73916E+14 | 37.10281029 | 21577.11319 | 3-oxoacid CoA-transferase activity                                          | Catalysis of the reaction: succinyl-CoA + a 3-oxo acid = succinate + a 3-oxo-acyl-CoA.                                          |
| GO:0008260 | 1 | 100 | 60795 | 33884 | 46144693 | 1.64487E+16 | 7.3376E+11  | 1.16459E+16 | 658.850286  | 28940.34927 | 3-oxoacid CoA-transferase activity                                          | Catalysis of the reaction: succinyl-CoA + a 3-oxo acid = succinate + a 3-oxo-acyl-CoA.                                          |
| GO:0008260 | 3 | 46  | 26855 | 33884 | 46144693 | 1.7129E+16  | 7.3376E+11  | 1.22306E+16 | 2978496880  | 33786301144 | 3-oxoacid CoA-transferase activity                                          | Catalysis of the reaction: succinyl-CoA + a 3-oxo acid = succinate + a 3-oxo-acyl-CoA.                                          |
| GO:0008422 | 2 | 79  | 22861 | 69158 | 46109419 | 3.45567E+15 | 1.49762E+16 | 1.20629E+16 | 416058.7406 | 12097933.38 | beta-glucosidase activity                                                   | Catalysis of the hydrolysis of terminal, non-reducing beta-D-glucose residues with release of beta-D-glucose.                   |
| GO:0008442 | 3 | 62  | 26855 | 42657 | 46135920 | 2.30869E+16 | 92374002776 | 1.32152E+16 | 2447739.897 | 6277464.617 | 3-hydroxyisobutyrate dehydrogenase activity                                 | Catalysis of the reaction: 3-hydroxy-2-methylpropanoate + NAD <sup>+</sup> = 2-methyl-3-oxopropanoate + NADH + H <sup>+</sup> . |
| GO:0008448 | 1 | 85  | 60795 | 23979 | 46154598 | 1.39814E+16 | 5.19267E+11 | 1.42896E+15 | 27.428193   | 197.0149666 | N-acetylglucosamine-6-phosphate deacetylase activity                        | Catalysis of the reaction: N-acetyl-D-glucosamine 6-phosphate + H <sub>2</sub> O = D-glucosamine 6-phosphate + acetate.         |
| GO:0008465 | 3 | 12  | 26855 | 6362  | 46172215 | 4.46844E+12 | 1.3777E+12  | 1.69752E+15 | 4.67095E+12 | 1.62892E+16 | glycerate dehydrogenase activity                                            | Catalysis of the reaction: (R)-glycerate + NAD <sup>+</sup> = hydroxypyruvate + NADH + H <sup>+</sup> .                         |
| GO:0008470 | 3 | 26  | 26855 | 12299 | 46166278 | 96816235338 | 2.66336E+12 | 1.862E+15   | 423500942.7 | 632395914.8 | isovaleryl-CoA dehydrogenase activity                                       | Catalysis of the reaction: 3-methylbutanoyl-CoA + ETF = 3-methylbut-2-enoyl-CoA + reduced ETF.                                  |
| GO:0008473 | 3 | 43  | 26855 | 15848 | 46162729 | 1.60119E+16 | 3.43189E+12 | 2.22207E+16 | 0.587963986 | 48.55406594 | ornithine cyclodeaminase activity                                           | Catalysis of the reaction: L-ornithine = L-proline + NH <sub>4</sub> (+).                                                       |
| GO:0008473 | 2 | 22  | 22861 | 15848 | 46162729 | 96233760553 | 3.43189E+12 | 1.48754E+16 | 2.48926E+11 | 1.41768E+12 | ornithine cyclodeaminase activity                                           | Catalysis of the reaction: L-ornithine = L-proline + NH <sub>4</sub> (+).                                                       |
| GO:0008478 | 1 | 50  | 60795 | 9674  | 46168903 | 8.22436E+11 | 2.09491E+11 | 1.97301E+16 | 21.17102485 | 158.9366574 | pyridoxal kinase activity                                                   | Catalysis of the reaction: ATP + pyridoxal = ADP + pyridoxal 5'-phosphate.                                                      |
| GO:0008660 | 1 | 19  | 60795 | 3991  | 46174586 | 3.12526E+11 | 86425356936 | 1.85445E+16 | 27680917116 | 2.28133E+11 | 1-aminocyclopropane-1-carboxylate deaminase activity                        | Catalysis of the reaction: 1-aminocyclopropane-1-carboxylate + H <sub>2</sub> O = 2-oxobutanate + NH <sub>4</sub> (+).          |
| GO:0008660 | 2 | 10  | 22861 | 3991  | 46174586 | 4.37426E+11 | 86425356936 | 2.33951E+16 | 4.17062E+11 | 2.1993E+12  | 1-aminocyclopropane-1-carboxylate deaminase activity                        | Catalysis of the reaction: 1-aminocyclopropane-1-carboxylate + H <sub>2</sub> O = 2-oxobutanate + NH <sub>4</sub> (+).          |
| GO:0008660 | 3 | 10  | 26855 | 3991  | 46174586 | 3.7237E+11  | 86425356936 | 2.10721E+15 | 1.53517E+11 | 6.42915E+11 | 1-aminocyclopropane-1-carboxylate deaminase activity                        | Catalysis of the reaction: 1-aminocyclopropane-1-carboxylate + H <sub>2</sub> O = 2-oxobutanate + NH <sub>4</sub> (+).          |
| GO:0008662 | 1 | 48  | 60795 | 10585 | 46167992 | 7.89539E+11 | 2.29219E+12 | 1.78428E+16 | 77.30677524 | 3359.996579 | 1-phosphofructokinase activity                                              | Catalysis of the reaction: ATP + D-fructose 1-phosphate = ADP + D-fructose 1,6-bisphosphate.                                    |
| GO:0008662 | 2 | 11  | 22861 | 10585 | 46167992 | 4.81169E+11 | 2.29219E+12 | 1.06982E+15 | 1.85589E+14 | 3.6665E+16  | 1-phosphofructokinase activity                                              | Catalysis of the reaction: ATP + D-fructose 1-phosphate = ADP + D-fructose 1,6-bisphosphate.                                    |
| GO:0008663 | 1 | 29  | 60795 | 5694  | 46172883 | 4.77013E+12 | 1.23304E+12 | 1.95181E+16 | 18751950.81 | 383301014.3 | 2',3'-cyclic-nucleotide 2'-phosphodiesterase activity                       | Catalysis of the reaction: nucleoside 2',3'-cyclic phosphate + H <sub>2</sub> O = nucleoside 3'-phosphate.                      |
| GO:0008666 | 2 | 34  | 22861 | 29519 | 46149058 | 1.48725E+14 | 6.39236E+11 | 1.21823E+16 | 1018238764  | 68585772534 | 2,3,4,5-tetrahydropyridine-2,6-dicarboxylate N-succinyltransferase activity | Catalysis of the reaction: (S)-2,3,4,5-tetrahydrodipicolinate + H <sub>2</sub> O +                                              |

|            |   |    |       |       |          |             |             |             |             |             |                                                                             |                                                                                                                               |
|------------|---|----|-------|-------|----------|-------------|-------------|-------------|-------------|-------------|-----------------------------------------------------------------------------|-------------------------------------------------------------------------------------------------------------------------------|
|            |   |    |       |       |          |             |             |             |             |             |                                                                             | succinyl-CoA = L-2-succinylamino-6-oxopimelate + CoA.                                                                         |
| GO:0008666 | 3 | 35 | 26855 | 29519 | 46149058 | 1.3033E+16  | 6.39236E+11 | 1.02774E+16 | 1.02882E+12 | 4.66811E+12 | 2,3,4,5-tetrahydropyridine-2,6-dicarboxylate N-succinyltransferase activity | Catalysis of the reaction: (S)-2,3,4,5-tetrahydrodipicolinate + H(2)O + succinyl-CoA = L-2-succinylamino-6-oxopimelate + CoA. |
| GO:0008667 | 1 | 13 | 60795 | 1086  | 46177491 | 2.13833E+11 | 23517398555 | 3.18469E+14 | 4210229.335 | 78306472.64 | 2,3-dihydro-2,3-dihydroxybenzoate dehydrogenase activity                    | Catalysis of the reaction: (2S,3S)-2,3-dihydroxy-2,3-dihydrobenzoate + NAD(+) = 2,3-dihydroxybenzoate + H(+) + NADH.          |
| GO:0008668 | 1 | 13 | 60795 | 1500  | 46177077 | 2.13833E+11 | 3.24826E+11 | 2.71875E+15 | 1731485794  | 2108939482  | (2,3-dihydroxybenzoyl)adenylate synthase activity                           | Catalysis of the reaction: 2,3-dihydroxybenzoate + ATP = 2,3-dihydroxybenzoyl 5'-adenylate + diphosphate.                     |
| GO:0008670 | 1 | 33 | 60795 | 6841  | 46171736 | 54280779669 | 1.48142E+11 | 1.87346E+16 | 578452.2305 | 138059494.8 | 2,4-dienoyl-CoA reductase (NADPH) activity                                  | Catalysis of the reaction: trans-2,3-didehydroacyl-CoA + NADP+ = trans,trans-2,3,4,5-tetradehydroacyl-CoA + NADPH + H+.       |
| GO:0008670 | 2 | 8  | 22861 | 6841  | 46171736 | 3.49941E+16 | 1.48142E+11 | 1.24013E+16 | 2.25741E+16 | 4.25999E+15 | 2,4-dienoyl-CoA reductase (NADPH) activity                                  | Catalysis of the reaction: trans-2,3-didehydroacyl-CoA + NADP+ = trans,trans-2,3,4,5-tetradehydroacyl-CoA + NADPH + H+.       |
| GO:0008671 | 1 | 23 | 60795 | 5494  | 46173083 | 3.78321E+11 | 1.18973E+12 | 1.66898E+15 | 22541449775 | 19190442499 | 2-dehydro-3-deoxygalactonokinase activity                                   | Catalysis of the reaction: 2-dehydro-3-deoxy-D-galactonate + ATP = 6-phospho-2-dehydro-3-deoxy-D-galactonate + ADP + 2 H(+).  |
| GO:0008671 | 3 | 14 | 26855 | 5494  | 46173083 | 5.21318E+11 | 1.18973E+12 | 2.13153E+16 | 6786370150  | 48721366076 | 2-dehydro-3-deoxygalactonokinase activity                                   | Catalysis of the reaction: 2-dehydro-3-deoxy-D-galactonate + ATP = 6-phospho-2-dehydro-3-deoxy-D-galactonate + ADP + 2 H(+).  |
| GO:0008671 | 2 | 7  | 22861 | 5494  | 46173083 | 3.06198E+12 | 1.18973E+12 | 1.36383E+16 | 2.12583E+15 | 4.06557E+16 | 2-dehydro-3-deoxygalactonokinase activity                                   | Catalysis of the reaction: 2-dehydro-3-deoxy-D-galactonate + ATP = 6-phospho-2-dehydro-3-deoxy-D-galactonate + ADP + 2 H(+).  |
| GO:0008674 | 1 | 17 | 60795 | 4608  | 46173969 | 2.79628E+11 | 99786530884 | 1.48659E+16 | 1.9577E+12  | 7.90161E+11 | 2-dehydro-3-deoxy-6-phosphogalactonate aldolase activity                    | Catalysis of the reaction: 6-phospho-2-dehydro-3-deoxy-D-galactonate = D-glyceraldehyde 3-phosphate + pyruvate.               |
| GO:0008674 | 3 | 13 | 26855 | 4608  | 46173969 | 4.84081E+11 | 99786530884 | 2.27833E+15 | 4925936132  | 37388217444 | 2-dehydro-3-deoxy-6-phosphogalactonate aldolase activity                    | Catalysis of the reaction: 6-phospho-2-dehydro-3-deoxy-D-galactonate = D-glyceraldehyde 3-phosphate + pyruvate.               |
| GO:0008675 | 1 | 88 | 60795 | 32119 | 46146458 | 1.44749E+16 | 6.95539E+11 | 1.05735E+16 | 533001.3185 | 128699558.1 | 2-dehydro-3-deoxy-phosphogluconate aldolase activity                        | Catalysis of the reaction: 2-dehydro-3-deoxy-D-gluconate 6-phosphate = pyruvate + D-glyceraldehyde 3-phosphate.               |
| GO:0008677 | 3 | 49 | 26855 | 34770 | 46143807 | 1.82461E+16 | 7.52947E+11 | 1.27697E+16 | 42425204.26 | 632395914.8 | 2-dehydropantoate 2-reductase activity                                      | Catalysis of the reaction: (R)-pantoate + NADP(+) = 2-dehydropantoate + H(+) + NADPH.                                         |
| GO:0008678 | 1 | 27 | 60795 | 9884  | 46168693 | 4.44115E+12 | 2.14039E+11 | 1.05306E+16 | 4.53199E+12 | 1.58716E+16 | 2-deoxy-D-gluconate 3-dehydrogenase activity                                | Catalysis of the reaction: 2-deoxy-D-gluconate + NAD+ = 3-dehydro-2-deoxy-D-gluconate + NADH + H+.                            |
| GO:0008679 | 3 | 31 | 26855 | 15668 | 46162909 | 1.15435E+16 | 3.39292E+11 | 1.76648E+16 | 102026262.8 | 1785027285  | 2-hydroxy-3-oxopropionate reductase activity                                | Catalysis of the reaction: (R)-glycerate + NADP+ = 2-hydroxy-3-oxopropionate + NADPH + H+.                                    |
| GO:0008684 | 3 | 9  | 26855 | 5355  | 46173222 | 3.35133E+12 | 1.15963E+12 | 1.53107E+16 | 4.80331E+15 | 1.19331E+16 | 2-oxopent-4-enoate hydratase activity                                       | Catalysis of the reaction: 4-hydroxy-2-oxopentanoate = 2-oxopent-4-enoate + H2O.                                              |
| GO:0008687 | 3 | 8  | 26855 | 485   | 46178092 | 2.97896E+11 | 1.05027E+11 | 4.82598E+15 | 732013.1716 | 16791568.81 | 3,4-dihydroxyphenylacetate 2,3-dioxygenase activity                         | Catalysis of the reaction: 3,4-dihydroxyphenylacetate + O(2) = 5-                                                             |

|            |   |    |       |       |          |             |             |              |             |             |                                                               |                                                                                                                                                                          |
|------------|---|----|-------|-------|----------|-------------|-------------|--------------|-------------|-------------|---------------------------------------------------------------|--------------------------------------------------------------------------------------------------------------------------------------------------------------------------|
| GO:0008689 | 3 | 38 | 26855 | 20360 | 46158217 | 1.41501E+16 | 4.40897E+11 | 1.68229E+13  | 1174086.043 | 251786590   | 3-demethylubiquinone-9 3-O-methyltransferase activity         | formyl-2-hydroxyhepta-2,4-dienedioate + H(+).<br>Catalysis of the reaction: S-adenosyl-L-methionine + 3-demethylubiquinone-9 = S-adenosyl-L-homocysteine + ubiquinone-9. |
| GO:0008692 | 1 | 50 | 60795 | 18270 | 46160307 | 8.22436E+11 | 3.95638E+11 | 1.05572E+15  | 2453936647  | 2.05941E+11 | 3-hydroxybutyryl-CoA epimerase activity                       | Catalysis of the reaction: (S)-3-hydroxybutanoyl-CoA = (R)-3-hydroxybutanoyl-CoA.                                                                                        |
| GO:0008692 | 3 | 28 | 26855 | 18270 | 46160307 | 1.04264E+15 | 3.95638E+11 | 1.39798E+16  | 6706132552  | 48239758372 | 3-hydroxybutyryl-CoA epimerase activity                       | Catalysis of the reaction: (S)-3-hydroxybutanoyl-CoA = (R)-3-hydroxybutanoyl-CoA.                                                                                        |
| GO:0008694 | 2 | 9  | 22861 | 48191 | 46130386 | 3.93684E+12 | 1.04358E+16 | -1.40643E+16 | 4.63002E+12 | 1.61601E+16 | 3-octaprenyl-4-hydroxybenzoate carboxylase activity           | Catalysis of the reaction: 3-octaprenyl-4-hydroxy benzoate = 2-octaprenylphenol + CO2.                                                                                   |
| GO:0008695 | 3 | 2  | 26855 | 390   | 46178187 | 74474027183 | 844547461.9 | 3.14049E+16  | 2.21013E+15 | 4.19668E+16 | 3-phenylpropionate dioxygenase activity                       | Catalysis of the reaction: 3-phenylpropionate + NADH + H+ + O2 = NAD+ + cis-3-(3-carboxyethyl)-3,5-cyclohexadiene-1,2-diol.                                              |
| GO:0008696 | 2 | 20 | 22861 | 20085 | 46158492 | 8.74852E+11 | 4.34942E+12 | 1.00822E+16  | 3.23282E+16 | 8.54566E+15 | 4-amino-4-deoxychorismate lyase activity                      | Catalysis of the reaction: 4-amino-4-deoxychorismate = 4-aminobenzoate + H(+) + pyruvate.                                                                                |
| GO:0008696 | 3 | 30 | 26855 | 20085 | 46158492 | 1.11711E+16 | 4.34942E+12 | 1.36088E+16  | 527178060.4 | 39504867721 | 4-amino-4-deoxychorismate lyase activity                      | Catalysis of the reaction: 4-amino-4-deoxychorismate = 4-aminobenzoate + H(+) + pyruvate.                                                                                |
| GO:0008697 | 1 | 29 | 60795 | 5655  | 46172922 | 4.77013E+12 | 1.22459E+12 | 1.96173E+16  | 16129220.27 | 334661057.9 | 4-deoxy-L-threo-5-hexosulose-uronate ketol-isomerase activity | Catalysis of the reaction: 5-dehydro-4-deoxy-D-glucuronate = 3-deoxy-D-glycero-2,5-hexodiulosonate.                                                                      |
| GO:0008697 | 2 | 8  | 22861 | 5655  | 46172922 | 3.49941E+16 | 1.22459E+12 | 1.51481E+15  | 8.10223E+14 | 1.8565E+15  | 4-deoxy-L-threo-5-hexosulose-uronate ketol-isomerase activity | Catalysis of the reaction: 5-dehydro-4-deoxy-D-glucuronate = 3-deoxy-D-glycero-2,5-hexodiulosonate.                                                                      |
| GO:0008701 | 3 | 10 | 26855 | 3838  | 46174739 | 3.7237E+11  | 83112132277 | 2.16361E+16  | 1.12362E+12 | 49886400581 | 4-hydroxy-2-oxovalerate aldolase activity                     | Catalysis of the reaction: 4-hydroxy-2-oxopentanoate = acetaldehyde + pyruvate.                                                                                          |
| GO:0008704 | 1 | 12 | 60795 | 2550  | 46176027 | 1.97385E+12 | 55220410971 | 1.83774E+16  | 1.96577E+12 | 7.91099E+11 | 5-carboxymethyl-2-hydroxyumuconate delta-isomerase activity   | Catalysis of the reaction: 5-carboxymethyl-2-hydroxyumuconate = 5-carboxy-2-oxohept-3-enedioate.                                                                         |
| GO:0008704 | 3 | 15 | 26855 | 2550  | 46176027 | 5.58555E+11 | 55220410971 | 3.33843E+14  | 67981.55628 | 19094955.5  | 5-carboxymethyl-2-hydroxyumuconate delta-isomerase activity   | Catalysis of the reaction: 5-carboxymethyl-2-hydroxyumuconate = 5-carboxy-2-oxohept-3-enedioate.                                                                         |
| GO:0008706 | 1 | 85 | 60795 | 9195  | 46169382 | 1.39814E+16 | 1.99118E+12 | 2.81181E+15  | 1.85581E-26 | 1.91566E-23 | 6-phospho-beta-glucosidase activity                           | Catalysis of the reaction: 6-phospho-beta-D-glucoside-(1,4)-D-glucose + H2O = D-glucose 6-phosphate + glucose.                                                           |
| GO:0008709 | 1 | 17 | 60795 | 2296  | 46176281 | 2.79628E+11 | 49720024937 | 2.49161E+15  | 23110024.12 | 365598810.7 | cholate 7-alpha-dehydrogenase activity                        | Catalysis of the reaction: cholate + NAD(+) = 3alpha,12alpha-dihydroxy-7-oxo-5beta-cholanate + H(+) + NADH.                                                              |
| GO:0008709 | 3 | 8  | 26855 | 2296  | 46176281 | 2.97896E+11 | 49720024937 | 2.58291E+16  | 76485269003 | 3.66792E+11 | cholate 7-alpha-dehydrogenase activity                        | Catalysis of the reaction: cholate + NAD(+) = 3alpha,12alpha-dihydroxy-7-oxo-5beta-cholanate + H(+) + NADH.                                                              |
| GO:0008709 | 2 | 7  | 22861 | 2296  | 46176281 | 3.06198E+12 | 49720024937 | 2.62257E+15  | 1.80128E+11 | 7.34202E+11 | cholate 7-alpha-dehydrogenase activity                        | Catalysis of the reaction: cholate + NAD(+) = 3alpha,12alpha-dihydroxy-7-oxo-5beta-cholanate + H(+) + NADH.                                                              |
| GO:0008714 | 1 | 35 | 60795 | 13278 | 46165299 | 5.75705E+11 | 2.87536E+11 | 1.00159E+15  | 1.43565E+12 | 6.08605E+11 | AMP nucleosidase activity                                     | Catalysis of the reaction: AMP + H(2)O = D-ribose 5-phosphate + adenine.                                                                                                 |

|            |   |     |       |       |          |             |             |              |             |             |                                             |                                                                                                                                                   |
|------------|---|-----|-------|-------|----------|-------------|-------------|--------------|-------------|-------------|---------------------------------------------|---------------------------------------------------------------------------------------------------------------------------------------------------|
| GO:0008714 | 2 | 14  | 22861 | 13278 | 46165299 | 6.12397E+11 | 2.87536E+11 | 1.09072E+16  | 7.75533E+15 | 1.78992E+16 | AMP nucleosidase activity                   | Catalysis of the reaction: AMP + H(2)O = D-ribose 5-phosphate + adenine.                                                                          |
| GO:0008714 | 3 | 21  | 26855 | 13278 | 46165299 | 7.81977E+11 | 2.87536E+11 | 1.44338E+16  | 5739012022  | 2.89687E+12 | AMP nucleosidase activity                   | Catalysis of the reaction: AMP + H(2)O = D-ribose 5-phosphate + adenine.                                                                          |
| GO:0008715 | 1 | 5   | 60795 | 725   | 46177852 | 82243605560 | 1.56999E+11 | 2.38915E+15  | 2.98153E+16 | 7.98361E+15 | CDP-diacylglycerol diphosphatase activity   | Catalysis of the reaction: CDP-diacylglycerol + H(2)O = a phosphatidate + CMP + 2 H(+).                                                           |
| GO:0008720 | 1 | 47  | 60795 | 14305 | 46164272 | 7.7309E+11  | 3.09776E+12 | 1.31941E+16  | 336943230.1 | 515273554.5 | D-lactate dehydrogenase activity            | Catalysis of the reaction: (R)-lactate + NAD(+) = H(+) + NADH + pyruvate.                                                                         |
| GO:0008721 | 3 | 12  | 26855 | 2733  | 46175844 | 4.46844E+12 | 5.91833E+11 | 2.91651E+15  | 1234388624  | 16027643484 | D-serine ammonia-lyase activity             | Catalysis of the reaction: D-serine = pyruvate + NH3.                                                                                             |
| GO:0008726 | 1 | 37  | 60795 | 12183 | 46166394 | 6.08603E+11 | 2.63824E+11 | 1.20593E+16  | 5137272693  | 38778425864 | alkanesulfonate monooxygenase activity      | Catalysis of the reaction: an alkanesulfonate + O2 + FMNH2 = an aldehyde + sulfite + H2O + FMN.                                                   |
| GO:0008726 | 3 | 20  | 26855 | 12183 | 46166394 | 7.4474E+11  | 2.63824E+11 | 1.49716E+16  | 51720862614 | 2.65286E+12 | alkanesulfonate monooxygenase activity      | Catalysis of the reaction: an alkanesulfonate + O2 + FMNH2 = an aldehyde + sulfite + H2O + FMN.                                                   |
| GO:0008726 | 2 | 13  | 22861 | 12183 | 46166394 | 5.68654E+11 | 2.63824E+11 | 1.10798E+16  | 9.159E+15   | 2.04308E+15 | alkanesulfonate monooxygenase activity      | Catalysis of the reaction: an alkanesulfonate + O2 + FMNH2 = an aldehyde + sulfite + H2O + FMN.                                                   |
| GO:0008733 | 2 | 10  | 22861 | 6107  | 46172470 | 4.37426E+11 | 1.32247E+11 | 1.7258E+16   | 1.16163E+16 | 3.60628E+15 | L-arabinose isomerase activity              | Catalysis of the reaction: L-arabinose = L-ribose.                                                                                                |
| GO:0008733 | 1 | 26  | 60795 | 6107  | 46172470 | 4.27667E+11 | 1.32247E+11 | 1.69325E+16  | 3784429025  | 4122930724  | L-arabinose isomerase activity              | Catalysis of the reaction: L-arabinose = L-ribose.                                                                                                |
| GO:0008736 | 1 | 8   | 60795 | 1325  | 46177252 | 1.3159E+11  | 2.8693E+11  | 2.19728E+16  | 4.52483E+12 | 1.58671E+15 | L-fucose isomerase activity                 | Catalysis of the reaction: L-fucose = L-fuculose.                                                                                                 |
| GO:0008738 | 2 | 3   | 22861 | 20427 | 46158150 | 1.31228E+11 | 4.42348E+11 | -1.75311E+15 | 9.49409E+15 | 2.09968E+16 | L-fuculose-phosphate aldolase activity      | Catalysis of the reaction: L-fuculose 1-phosphate = (S)-lactaldehyde + glycercane phosphate.                                                      |
| GO:0008742 | 1 | 31  | 60795 | 8639  | 46169938 | 5099103545  | 1.87078E+12 | 1.4466E+16   | 11334745693 | 1.07589E+11 | L-ribose-phosphate 4-epimerase activity     | Catalysis of the reaction: L-ribose 5-phosphate = D-xylulose 5-phosphate.                                                                         |
| GO:0008744 | 3 | 6   | 26855 | 724   | 46177853 | 2.23422E+12 | 15678265703 | 3.83293E+15  | 53026885019 | 39664494247 | L-xylulokinase activity                     | Catalysis of the reaction: ATP + L-xylulose = ADP + L-xylulose 5-phosphate.                                                                       |
| GO:0008745 | 1 | 287 | 60795 | 77917 | 46100660 | 4.72078E+15 | 1.6873E+15  | 1.48431E+15  | 1.5889E-34  | 6.56058E-32 | N-acetylmuramoyl-L-alanine amidase activity | Catalysis of the hydrolysis of the link between N-acetylmuramoyl residues and L-amino acid residues in certain bacterial cell-wall glycopeptides. |
| GO:0008756 | 2 | 19  | 22861 | 13280 | 46165297 | 8.3111E+11  | 2.87579E+12 | 1.53108E+16  | 5.80386E+11 | 2.9118E+12  | o-succinylbenzoate-CoA ligase activity      | Catalysis of the reaction: 2-succinylbenzoate + ATP + CoA = 2-succinylbenzoyl-CoA + AMP + diphosphate.                                            |
| GO:0008756 | 1 | 38  | 60795 | 13280 | 46165297 | 6.25051E+11 | 2.87579E+12 | 1.12002E+16  | 1.4186E+11  | 90812272210 | o-succinylbenzoate-CoA ligase activity      | Catalysis of the reaction: 2-succinylbenzoate + ATP + CoA = 2-succinylbenzoyl-CoA + AMP + diphosphate.                                            |
| GO:0008767 | 1 | 18  | 60795 | 6575  | 46172002 | 2.96077E+12 | 1.42382E+11 | 1.05621E+16  | 3.5862E+15  | 9.33632E+15 | UDP-galactopyranose mutase activity         | Catalysis of the reaction: UDP-D-galactopyranose = UDP-D-galacto-1,4-furanose.                                                                    |
| GO:0008767 | 2 | 8   | 22861 | 6575  | 46172002 | 3.49941E+16 | 1.42382E+11 | 1.29734E+15  | 1.83732E+16 | 3.63329E+15 | UDP-galactopyranose mutase activity         | Catalysis of the reaction: UDP-D-galactopyranose = UDP-D-galacto-1,4-furanose.                                                                    |
| GO:0008768 | 1 | 10  | 60795 | 1138  | 46177439 | 1.64487E+12 | 24643461837 | 2.7387E+14   | 3938563371  | 3.09759E+11 | UDP-sugar diphosphatase activity            | Catalysis of the reaction: UDP-sugar + H2O = UMP + sugar 1-phosphate.                                                                             |
| GO:0008768 | 3 | 6   | 26855 | 1138  | 46177439 | 2.23422E+12 | 24643461837 | 3.18049E+16  | 65686654115 | 32553655299 | UDP-sugar diphosphatase activity            | Catalysis of the reaction: UDP-sugar + H2O = UMP + sugar 1-phosphate.                                                                             |

|            |   |    |       |       |          |             |             |             |             |             |                                                              |                                                                                                                                                |
|------------|---|----|-------|-------|----------|-------------|-------------|-------------|-------------|-------------|--------------------------------------------------------------|------------------------------------------------------------------------------------------------------------------------------------------------|
| GO:0008770 | 1 | 5  | 60795 | 545   | 46178032 | 82243605560 | 1.1802E+11  | 2.80087E+16 | 8644293868  | 2.77329E+15 | [acyl-carrier-protein] phosphodiesterase activity            | Catalysis of the reaction: [acyl-carrier protein] + H <sub>2</sub> O = 4'-phosphopantetheine + apoprotein.                                     |
| GO:0008771 | 1 | 8  | 60795 | 859   | 46177718 | 1.3159E+11  | 1.86017E+11 | 2.82254E+16 | 2.38554E+11 | 1.38147E+12 | [citrate (pro-3S)-lyase] ligase activity                     | Catalysis of the reaction: ATP + acetate + (citrate (pro-3S)-lyase (thiol form)) = AMP + diphosphate + (citrate (pro-3S)-lyase (acetyl form)). |
| GO:0008772 | 3 | 13 | 26855 | 4726  | 46173851 | 4.84081E+11 | 1.02342E+12 | 2.24185E+16 | 6429453681  | 4.67381E+11 | [isocitrate dehydrogenase (NADP+)] kinase activity           | Catalysis of the reaction: ATP + (isocitrate dehydrogenase (NADP)) = ADP + (isocitrate dehydrogenase (NADP)) phosphate.                        |
| GO:0008773 | 3 | 40 | 26855 | 29695 | 46148882 | 1.48948E+16 | 6.43047E+11 | 1.21181E+16 | 2012975494  | 17684203863 | [protein-P1I] uridylyltransferase activity                   | Catalysis of the reaction: UTP + (protein-P1I) = diphosphate + uridylyl-(protein-P1I).                                                         |
| GO:0008774 | 1 | 41 | 60795 | 7641  | 46170936 | 6.74398E+11 | 1.65466E+12 | 2.02706E+16 | 1997.029429 | 9934.619893 | acetaldehyde dehydrogenase (acetylating) activity            | Catalysis of the reaction: acetaldehyde + CoA + NAD <sup>+</sup> = acetyl-CoA + NADH + H <sup>+</sup> .                                        |
| GO:0008775 | 3 | 6  | 26855 | 2411  | 46176166 | 2.23422E+12 | 5221035720  | 2.09736E+15 | 3.21187E+15 | 8.50115E+15 | acetate CoA-transferase activity                             | Catalysis of the reaction: acyl-CoA + acetate = a fatty acid anion + acetyl-CoA.                                                               |
| GO:0008781 | 3 | 8  | 26855 | 3792  | 46174785 | 2.97896E+11 | 82115999373 | 1.85907E+15 | 1.99756E+16 | 5.70003E+15 | N-acylneuramate cytidylyltransferase activity                | Catalysis of the reaction: CTP + N-acylneuramate = diphosphate + CMP-N-acylneuramate.                                                          |
| GO:0008782 | 1 | 71 | 60795 | 16771 | 46161806 | 1.16786E+16 | 3.63177E+12 | 1.68512E+16 | 1.054842402 | 106.2303482 | adenosylhomocysteine nucleosidase activity                   | Catalysis of the reaction: S-adenosyl-L-homocysteine + H <sub>2</sub> O = adenine + S-D-ribosyl-L-homocysteine.                                |
| GO:0008782 | 3 | 22 | 26855 | 16771 | 46161806 | 8.19214E+11 | 3.63177E+12 | 1.17357E+16 | 5.04357E+11 | 1.73396E+15 | adenosylhomocysteine nucleosidase activity                   | Catalysis of the reaction: S-adenosyl-L-homocysteine + H <sub>2</sub> O = adenine + S-D-ribosyl-L-homocysteine.                                |
| GO:0008783 | 1 | 68 | 60795 | 22162 | 46156415 | 1.11851E+16 | 4.7992E+12  | 1.22072E+16 | 591915.9237 | 140460968.3 | agmatinase activity                                          | Catalysis of the reaction: agmatine + H(2)O = putrescine + urea.                                                                               |
| GO:0008788 | 1 | 10 | 60795 | 1403  | 46177174 | 1.64487E+12 | 30382053566 | 2.43668E+16 | 23543989154 | 1.36535E+12 | alpha,alpha-phosphotrehalase activity                        | Catalysis of the reaction: alpha,alpha-trehalose 6-phosphate + H <sub>2</sub> O = D-glucose + D-glucose 6-phosphate.                           |
| GO:0008789 | 1 | 35 | 60795 | 13063 | 46165514 | 5.75705E+11 | 2.8288E+11  | 1.02514E+16 | 1.06045E+12 | 4.7697E+12  | altronate dehydratase activity                               | Catalysis of the reaction: D-altronate = 2-dehydro-3-deoxy-D-gluconate + H(2)O.                                                                |
| GO:0008789 | 2 | 13 | 22861 | 13063 | 46165514 | 5.68654E+11 | 2.8288E+11  | 1.00736E+16 | 1.5407E+16  | 3.13068E+16 | altronate dehydratase activity                               | Catalysis of the reaction: D-altronate = 2-dehydro-3-deoxy-D-gluconate + H(2)O.                                                                |
| GO:0008791 | 1 | 21 | 60795 | 7106  | 46171471 | 3.45423E+11 | 1.53881E+11 | 1.16655E+15 | 7.04685E+11 | 2.30924E+15 | arginine N-succinyltransferase activity                      | Catalysis of the reaction: succinyl-CoA + L-arginine = CoA + N2-succinyl-L-arginine.                                                           |
| GO:0008793 | 1 | 29 | 60795 | 8946  | 46169631 | 4.77013E+12 | 1.93726E+12 | 1.30001E+16 | 15933300633 | 1.00748E+12 | aromatic-amino-acid:2-oxoglutarate aminotransferase activity | Catalysis of the reaction: an aromatic amino acid + 2-oxoglutarate = an aromatic oxo acid + L-glutamate.                                       |
| GO:0008793 | 3 | 21 | 26855 | 8946  | 46169631 | 7.81977E+11 | 1.93726E+12 | 2.01311E+16 | 1515191683  | 18900986278 | aromatic-amino-acid:2-oxoglutarate aminotransferase activity | Catalysis of the reaction: an aromatic amino acid + 2-oxoglutarate = an aromatic oxo acid + L-glutamate.                                       |
| GO:0008793 | 2 | 11 | 22861 | 8946  | 46169631 | 4.81169E+11 | 1.93726E+12 | 1.31252E+16 | 5.93961E+13 | 1.4242E+16  | aromatic-amino-acid:2-oxoglutarate aminotransferase activity | Catalysis of the reaction: an aromatic amino acid + 2-oxoglutarate = an aromatic oxo acid + L-glutamate.                                       |
| GO:0008795 | 2 | 21 | 22861 | 19014 | 46159563 | 9.18595E+11 | 4.11749E+11 | 1.15766E+16 | 7.63226E+11 | 2.4853E+15  | NAD <sup>+</sup> synthase activity                           | Catalysis of the reaction: ATP + deamido-NAD <sup>+</sup> + NH <sub>3</sub> = AMP + diphosphate + NAD <sup>+</sup> .                           |
| GO:0008797 | 2 | 9  | 22861 | 7264  | 46171313 | 3.93684E+12 | 1.57302E+11 | 1.3235E+16  | 1.15695E+16 | 2.46749E+15 | aspartate ammonia-lyase activity                             | Catalysis of the reaction: L-aspartate = fumarate + NH <sub>3</sub> .                                                                          |
| GO:0008797 | 1 | 21 | 60795 | 7264  | 46171313 | 3.45423E+11 | 1.57302E+11 | 1.13482E+16 | 9.226E+11   | 2.93936E+16 | aspartate ammonia-lyase activity                             | Catalysis of the reaction: L-aspartate = fumarate + NH <sub>3</sub> .                                                                          |

|            |   |     |       |       |          |             |             |             |             |             |                                                          |                                                                                                                                                           |
|------------|---|-----|-------|-------|----------|-------------|-------------|-------------|-------------|-------------|----------------------------------------------------------|-----------------------------------------------------------------------------------------------------------------------------------------------------------|
| GO:0008797 | 3 | 12  | 26855 | 7264  | 46171313 | 4.46844E+12 | 1.57302E+11 | 1.50623E+16 | 1.4338E+15  | 4.31184E+15 | aspartate ammonia-lyase activity                         | Catalysis of the reaction: L-aspartate = fumarate + NH <sub>3</sub> .                                                                                     |
| GO:0008800 | 1 | 112 | 60795 | 37829 | 46140748 | 1.84226E+16 | 8.19189E+11 | 1.16921E+16 | 24.09510909 | 14630.69197 | beta-lactamase activity                                  | Catalysis of the reaction: a beta-lactam + H <sub>2</sub> O = a substituted beta-amino acid.                                                              |
| GO:0008800 | 2 | 47  | 22861 | 37829 | 46140748 | 2.0559E+16  | 8.19189E+11 | 1.3275E+16  | 288396422.6 | 442672427.1 | beta-lactamase activity                                  | Catalysis of the reaction: a beta-lactam + H <sub>2</sub> O = a substituted beta-amino acid.                                                              |
| GO:0008801 | 1 | 13  | 60795 | 2650  | 46175927 | 2.13833E+11 | 5.73859E+11 | 1.89772E+16 | 72394765918 | 3.51668E+11 | beta-phosphoglucomutase activity                         | Catalysis of the reaction: beta-D-glucose 1-phosphate = beta-D-glucose 6-phosphate.                                                                       |
| GO:0008802 | 2 | 19  | 22861 | 15981 | 46162596 | 8.3111E+11  | 34606956382 | 1.26398E+14 | 5.67741E+11 | 1.9199E+15  | betaine-aldehyde dehydrogenase activity                  | Catalysis of the reaction: betaine aldehyde + NAD <sup>+</sup> + H <sub>2</sub> O = betaine + NADH + H <sup>+</sup> .                                     |
| GO:0008802 | 1 | 51  | 60795 | 15981 | 46162596 | 8.38885E+11 | 34606956382 | 1.27741E+16 | 225479237.7 | 358078374   | betaine-aldehyde dehydrogenase activity                  | Catalysis of the reaction: betaine aldehyde + NAD <sup>+</sup> + H <sub>2</sub> O = betaine + NADH + H <sup>+</sup> .                                     |
| GO:0008803 | 3 | 18  | 26855 | 9753  | 46168824 | 6.70266E+11 | 2.11202E+11 | 1.66611E+16 | 27761529641 | 1.54902E+11 | bis(5'-nucleosyl)-tetrphosphatase (symmetrical) activity | Catalysis of the reaction: P(1),P(4)-bis(5'-adenosyl) tetrphosphate + H(2)O = 2 ADP + 2 H(+).                                                             |
| GO:0008804 | 1 | 24  | 60795 | 5623  | 46172954 | 3.94769E+11 | 1.21766E+12 | 1.69689E+16 | 991581101.1 | 9588380250  | carbamate kinase activity                                | Catalysis of the reaction: ATP + NH <sub>3</sub> + CO <sub>2</sub> = ADP + carbamoyl phosphate.                                                           |
| GO:0008806 | 3 | 61  | 26855 | 44513 | 46134064 | 2.27146E+15 | 9.63932E+11 | 1.23662E+16 | 2917871.089 | 576454053.9 | carboxymethylenebutenolidase activity                    | Catalysis of the reaction: 4-carboxymethylenebut-2-en-4-olide + H <sub>2</sub> O = 4 oxohex-2-enedioate.                                                  |
| GO:0008811 | 1 | 17  | 60795 | 2766  | 46175811 | 2.79628E+11 | 59897904606 | 2.22293E+16 | 310553527.8 | 3466979051  | chloramphenicol O-acetyltransferase activity             | Catalysis of the reaction: chloramphenicol + acetyl-CoA = chloramphenicol 3-acetate + CoA.                                                                |
| GO:0008812 | 1 | 50  | 60795 | 17974 | 46160603 | 8.22436E+11 | 3.89228E+11 | 1.07929E+16 | 15778958462 | 1.43505E+11 | choline dehydrogenase activity                           | Catalysis of the reaction: A + choline = AH(2) + betaine aldehyde.                                                                                        |
| GO:0008812 | 3 | 36  | 26855 | 17974 | 46160603 | 1.34053E+16 | 3.89228E+11 | 1.78412E+16 | 514995.3207 | 12508327.52 | choline dehydrogenase activity                           | Catalysis of the reaction: A + choline = AH(2) + betaine aldehyde.                                                                                        |
| GO:0008812 | 2 | 22  | 22861 | 17974 | 46160603 | 96233760553 | 3.89228E+11 | 1.30593E+16 | 1.4856E+12  | 6.2555E+11  | choline dehydrogenase activity                           | Catalysis of the reaction: A + choline = AH(2) + betaine aldehyde.                                                                                        |
| GO:0008816 | 2 | 29  | 22861 | 25269 | 46153308 | 1.26854E+16 | 5.47202E+11 | 1.21302E+16 | 4610698404  | 2.40982E+12 | citryl-CoA lyase activity                                | Catalysis of the reaction: (3S)-citryl-CoA = acetyl-CoA + oxaloacetate.                                                                                   |
| GO:0008816 | 3 | 50  | 26855 | 25269 | 46153308 | 1.86185E+15 | 5.47202E+11 | 1.76659E+16 | 416.2821125 | 197566.5336 | citryl-CoA lyase activity                                | Catalysis of the reaction: (3S)-citryl-CoA = acetyl-CoA + oxaloacetate.                                                                                   |
| GO:0008820 | 1 | 58  | 60795 | 21146 | 46157431 | 9.54026E+11 | 4.57918E+11 | 1.05894E+16 | 387130032   | 418445000.5 | cobinamide phosphate guanylyltransferase activity        | Catalysis of the reaction: adenosylcobinamide phosphate + GTP + 2 H(+) = adenosylcobinamide-GDP + diphosphate.                                            |
| GO:0008820 | 3 | 33  | 26855 | 21146 | 46157431 | 1.22882E+16 | 4.57918E+11 | 1.42411E+16 | 73797358.43 | 73779489825 | cobinamide phosphate guanylyltransferase activity        | Catalysis of the reaction: adenosylcobinamide phosphate + GTP + 2 H(+) = adenosylcobinamide-GDP + diphosphate.                                            |
| GO:0008824 | 3 | 12  | 26855 | 2954  | 46175623 | 4.46844E+12 | 63969056474 | 2.80433E+15 | 279566807.7 | 31799761675 | cyanate hydratase activity                               | Catalysis of the reaction: cyanate + H <sub>2</sub> O = carbamate.                                                                                        |
| GO:0008825 | 3 | 66  | 26855 | 40590 | 46137987 | 2.45764E+16 | 8.78979E+11 | 1.48337E+16 | 621.9603077 | 276137.0011 | cyclopropane-fatty-acyl-phospholipid synthase activity   | Catalysis of the reaction: S-adenosyl-L-methionine + phospholipid olefinic fatty acid = S-adenosyl-L-homocysteine + phospholipid cyclopropane fatty acid. |
| GO:0008851 | 3 | 36  | 26855 | 12233 | 46166344 | 1.34053E+16 | 2.64906E+11 | 2.33925E+16 | 122.2353935 | 788.609281  | ethanolamine ammonia-lyase activity                      | Catalysis of the reaction: ethanolamine = acetaldehyde + NH <sub>3</sub> .                                                                                |
| GO:0008852 | 1 | 13  | 60795 | 3495  | 46175082 | 2.13833E+11 | 75684445625 | 1.49842E+16 | 97161247453 | 3.08125E+15 | exodeoxyribonuclease I activity                          | Catalysis of the degradation of single-stranded DNA. It acts progressively in a 3' to 5' direction, releasing 5'-phosphomononucleotides.                  |

|            |   |     |       |       |          |             |             |             |             |             |                                             |                                                                                                                                                 |
|------------|---|-----|-------|-------|----------|-------------|-------------|-------------|-------------|-------------|---------------------------------------------|-------------------------------------------------------------------------------------------------------------------------------------------------|
| GO:0008852 | 3 | 7   | 26855 | 3495  | 46175082 | 2.60659E+12 | 75684445625 | 1.7841E+16  | 4.92102E+15 | 1.21816E+16 | exodeoxyribonuclease I activity             | Catalysis of the degradation of single-stranded DNA. It acts progressively in a 3' to 5' direction, releasing 5'-phosphomononucleotides.        |
| GO:0008853 | 2 | 63  | 22861 | 62721 | 46115856 | 2.75578E+16 | 1.35823E+16 | 1.02074E+16 | 307367814.2 | 34487002847 | exodeoxyribonuclease III activity           | Catalysis of the degradation of double-stranded DNA. It acts progressively in a 3' to 5' direction, releasing 5'-phosphomononucleotides.        |
| GO:0008853 | 3 | 73  | 26855 | 62721 | 46115856 | 2.7183E+15  | 1.35823E+16 | 1.00098E+16 | 64413076.99 | 907718754   | exodeoxyribonuclease III activity           | Catalysis of the degradation of double-stranded DNA. It acts progressively in a 3' to 5' direction, releasing 5'-phosphomononucleotides.        |
| GO:0008854 | 1 | 115 | 60795 | 41237 | 46137340 | 1.8916E+15  | 8.9299E+11  | 1.08289E+16 | 486.6917277 | 22579.2151  | exodeoxyribonuclease V activity             | Catalysis of the exonucleolytic cleavage (in the presence of ATP) in either 5' to 3' or 3' to 5' direction to yield 5'-phosphooligonucleotides. |
| GO:0008859 | 3 | 16  | 26855 | 7915  | 46170662 | 5.95792E+11 | 1.714E+11   | 1.79744E+16 | 2.62213E+11 | 1.47951E+12 | exoribonuclease II activity                 | Catalysis of the reaction: RNA + H <sub>2</sub> O = 5'-phosphomononucleotides.                                                                  |
| GO:0008860 | 3 | 22  | 26855 | 12282 | 46166295 | 8.19214E+11 | 2.65967E+12 | 1.62299E+16 | 6091118055  | 44751292618 | ferredoxin-NAD+ reductase activity          | Cleaves RNA in the 3' to 5' direction. Catalysis of the reaction: reduced ferredoxin + NAD+ = oxidized ferredoxin + NADH + H+.                  |
| GO:0008860 | 2 | 16  | 22861 | 12282 | 46166295 | 6.99882E+11 | 2.65967E+12 | 1.39586E+16 | 5.81702E+11 | 1.95114E+15 | ferredoxin-NAD+ reductase activity          | Catalysis of the reaction: reduced ferredoxin + NAD+ = oxidized ferredoxin + NADH + H+.                                                         |
| GO:0008861 | 1 | 58  | 60795 | 8777  | 46169800 | 9.54026E+11 | 1.90066E+12 | 2.32752E+16 | 1.92918E-06 | 3.98278E-05 | formate C-acetyltransferase activity        | Catalysis of the reaction: acetyl-CoA + formate = CoA + pyruvate.                                                                               |
| GO:0008864 | 3 | 40  | 26855 | 26662 | 46151915 | 1.48948E+16 | 5.77367E+11 | 1.36725E+16 | 1468332012  | 18654593469 | formyltetrahydrofolate deformylase activity | Catalysis of the reaction: 10-formyltetrahydrofolate + H(2)O = (6S)-5,6,7,8-tetrahydrofolate + formate + H(+).                                  |
| GO:0008865 | 1 | 101 | 60795 | 38263 | 46140314 | 1.66132E+16 | 8.28588E+11 | 1.0036E+16  | 2185724.904 | 5640536.33  | fructokinase activity                       | Catalysis of the reaction: ATP + D-fructose = ADP + D-fructose 6-phosphate.                                                                     |
| GO:0008866 | 1 | 19  | 60795 | 4134  | 46174443 | 3.12526E+11 | 89522030963 | 1.80366E+16 | 4537953774  | 3.48924E+11 | fructuronate reductase activity             | Catalysis of the reaction: D-mannonate + NAD(+) = D-fructuronate + H(+) + NADH.                                                                 |
| GO:0008866 | 3 | 10  | 26855 | 4134  | 46174443 | 3.7237E+11  | 89522030963 | 2.05642E+16 | 2.02799E+12 | 8.10608E+11 | fructuronate reductase activity             | Catalysis of the reaction: D-mannonate + NAD(+) = D-fructuronate + H(+) + NADH.                                                                 |
| GO:0008867 | 3 | 9   | 26855 | 2416  | 46176161 | 3.35133E+12 | 52318632512 | 2.67934E+16 | 1.65547E+11 | 1.03099E+12 | galactarate dehydratase activity            | Catalysis of the reaction: galactarate = 5-dehydro-4-deoxy-D-gluconate + H(2)O.                                                                 |
| GO:0008872 | 3 | 16  | 26855 | 3166  | 46175411 | 5.95792E+11 | 68559929857 | 3.11937E+15 | 1433175.842 | 3793322.47  | glucarate dehydratase activity              | Catalysis of the reaction: D-gluconate = 5-dehydro-4-deoxy-D-gluconate + H <sub>2</sub> O.                                                      |
| GO:0008873 | 1 | 15  | 60795 | 3306  | 46175271 | 2.46731E+11 | 71591638694 | 1.78507E+16 | 5.02907E+11 | 2.59563E+12 | gluconate 2-dehydrogenase activity          | Catalysis of the reaction: D-gluconate + NADP+ = 2-dehydro-D-gluconate + NADPH + H+.                                                            |
| GO:0008873 | 3 | 11  | 26855 | 3306  | 46175271 | 4.09607E+12 | 71591638694 | 2.51638E+15 | 56989179518 | 4209451203  | gluconate 2-dehydrogenase activity          | Catalysis of the reaction: D-gluconate + NADP+ = 2-dehydro-D-gluconate + NADPH + H+.                                                            |
| GO:0008873 | 2 | 7   | 22861 | 3306  | 46175271 | 3.06198E+12 | 71591638694 | 2.0966E+16  | 1.51069E+16 | 4.48107E+15 | gluconate 2-dehydrogenase activity          | Catalysis of the reaction: D-gluconate + NADP+ = 2-dehydro-D-gluconate + NADPH + H+.                                                            |
| GO:0008874 | 3 | 33  | 26855 | 20510 | 46158067 | 1.22882E+16 | 4.44145E+12 | 1.46817E+16 | 383333128   | 4165217067  | gluconate 5-dehydrogenase activity          | Catalysis of the reaction: D-gluconate + NADP+ = 5-dehydro-D-gluconate + NADPH + H+.                                                            |

|            |   |     |       |       |          |             |             |              |             |             |                                                              |                                                                                                                                                                                                     |
|------------|---|-----|-------|-------|----------|-------------|-------------|--------------|-------------|-------------|--------------------------------------------------------------|-----------------------------------------------------------------------------------------------------------------------------------------------------------------------------------------------------|
| GO:0008878 | 1 | 107 | 60795 | 39286 | 46139291 | 1.76001E+16 | 8.50741E+11 | 1.04879E+16  | 11574.85998 | 3982716.404 | glucose-1-phosphate adenyltransferase activity               | Catalysis of the reaction: alpha-D-glucose 1-phosphate + ATP = ADP-glucose + diphosphate.                                                                                                           |
| GO:0008878 | 3 | 10  | 26855 | 39286 | 46139291 | 3.7237E+11  | 8.50741E+11 | -1.19198E+15 | 2.15345E+15 | 6.05694E+15 | glucose-1-phosphate adenyltransferase activity               | Catalysis of the reaction: alpha-D-glucose 1-phosphate + ATP = ADP-glucose + diphosphate.                                                                                                           |
| GO:0008880 | 1 | 43  | 60795 | 14075 | 46164502 | 7.07295E+11 | 30479501350 | 1.21447E+16  | 815661398.8 | 8068427016  | glucuronate isomerase activity                               | Catalysis of the reaction: D-glucuronate = D-fructuronate.                                                                                                                                          |
| GO:0008882 | 3 | 31  | 26855 | 25837 | 46152740 | 1.15435E+16 | 55950186598 | 1.04486E+16  | 2.01076E+12 | 8.04501E+11 | [glutamate-ammonia-ligase] adenyltransferase activity        | Catalysis of the reaction: ATP + [L-glutamate:ammonia ligase (ADP-forming)] = diphosphate + adenyl-[L-glutamate:ammonia ligase (ADP-forming)].                                                      |
| GO:0008887 | 1 | 68  | 60795 | 19863 | 46158714 | 1.11851E+16 | 4.30135E+12 | 1.37872E+16  | 6551.304173 | 2459121.357 | glycerate kinase activity                                    | Catalysis of the reaction: D-glycerate + ATP = 3-phospho-D-glycerate + ADP + 2 H(+).                                                                                                                |
| GO:0008892 | 3 | 17  | 26855 | 8519  | 46170058 | 6.33029E+11 | 1.84479E+12 | 1.77881E+16  | 1.75414E+11 | 1.07302E+12 | guanine deaminase activity                                   | Catalysis of the reaction: guanine + H2O = xanthine + NH3.                                                                                                                                          |
| GO:0008893 | 1 | 18  | 60795 | 5935  | 46172642 | 2.96077E+12 | 1.28523E+12 | 1.20395E+16  | 1.22623E+16 | 3.76608E+16 | guanosine-3',5'-bis(diphosphate) 3'-diphosphatase activity   | Catalysis of the reaction: guanosine 3',5'-bis(diphosphate) + H2O = guanosine 5'-diphosphate + diphosphate.                                                                                         |
| GO:0008893 | 3 | 9   | 26855 | 5935  | 46172642 | 3.35133E+12 | 1.28523E+12 | 1.38271E+16  | 9.055E+14   | 2.02317E+16 | guanosine-3',5'-bis(diphosphate) 3'-diphosphatase activity   | Catalysis of the reaction: guanosine 3',5'-bis(diphosphate) + H2O = guanosine 5'-diphosphate + diphosphate.                                                                                         |
| GO:0008899 | 1 | 50  | 60795 | 6771  | 46171806 | 8.22436E+11 | 1.46626E+12 | 2.48776E+16  | 1.49088E-05 | 0.000256494 | homoserine O-succinyltransferase activity                    | Catalysis of the reaction: L-homoserine + succinyl-CoA = O-succinyl-L-homoserine + CoA.                                                                                                             |
| GO:0008901 | 3 | 9   | 26855 | 1541  | 46177036 | 3.35133E+12 | 3.33705E+11 | 3.32809E+16  | 4510561232  | 4763198805  | ferredoxin hydrogenase activity                              | Catalysis of the reaction: 2 reduced ferredoxin + 2 H+ = 2 oxidized ferredoxin + H2.                                                                                                                |
| GO:0008906 | 1 | 9   | 60795 | 870   | 46177707 | 1.48038E+12 | 1.88399E+11 | 2.97411E+15  | 3248024101  | 26142478586 | inosine kinase activity                                      | Catalysis of the reaction: ATP + inosine = ADP + IMP.                                                                                                                                               |
| GO:0008908 | 1 | 13  | 60795 | 1342  | 46177235 | 2.13833E+11 | 2.90611E+11 | 2.87933E+16  | 49027445.11 | 707812310.7 | isochorismatase activity                                     | Catalysis of the reaction: H(2)O + isochorismate = 2,3-dihydroxy-2,3-dihydrobenzoate + pyruvate.                                                                                                    |
| GO:0008909 | 2 | 19  | 22861 | 15564 | 46163013 | 8.3111E+11  | 3.37039E+12 | 1.30212E+14  | 4.15649E+11 | 1.47933E+16 | isochorismate synthase activity                              | Catalysis of the reaction: chorismate = isochorismate.                                                                                                                                              |
| GO:0008909 | 1 | 52  | 60795 | 15564 | 46163013 | 8.55333E+11 | 3.37039E+12 | 1.34357E+16  | 3864510.761 | 72529840.6  | isochorismate synthase activity                              | Catalysis of the reaction: chorismate = isochorismate.                                                                                                                                              |
| GO:0008911 | 1 | 10  | 60795 | 595   | 46177982 | 1.64487E+12 | 1.28848E+11 | 3.67424E+16  | 110420280.3 | 1899688906  | lactaldehyde dehydrogenase activity                          | Catalysis of the reaction: (S)-lactaldehyde + NAD+ + H2O = (S)-lactate + NADH + H+.                                                                                                                 |
| GO:0008914 | 3 | 43  | 26855 | 31129 | 46147448 | 1.60119E+16 | 6.741E+11   | 1.24811E+16  | 4536377664  | 4778240657  | leucyltransferase activity                                   | Catalysis of the reaction: L-leucyl-tRNA + protein = tRNA + L-leucyl-protein.                                                                                                                       |
| GO:0008922 | 2 | 2   | 22861 | 16320 | 46162257 | 87485236866 | 3.53411E+12 | -2.01423E+16 | 1.29013E+16 | 2.7054E+15  | long-chain fatty acid [acyl-carrier-protein] ligase activity | Catalysis of the reaction: ATP + an acid + [acyl-carrier protein] = AMP + diphosphate + acyl-[acyl-carrier protein]. A long-chain fatty acid is fatty acid with a chain length between C13 and C22. |
| GO:0008923 | 3 | 8   | 26855 | 3138  | 46175439 | 2.97896E+11 | 67953588089 | 2.13219E+16  | 6.09724E+11 | 2.02865E+15 | lysine decarboxylase activity                                | Catalysis of the reaction: L-lysine + H(+) = cadaverine + CO(2).                                                                                                                                    |
| GO:0008924 | 2 | 11  | 22861 | 5973  | 46172604 | 4.81169E+11 | 1.29346E+11 | 1.89531E+16  | 2.57576E+12 | 9.95815E+11 | malate dehydrogenase (quinone) activity                      | Catalysis of the reaction: (S)-malate + a quinone = oxaloacetate + a quinol.                                                                                                                        |
| GO:0008924 | 1 | 26  | 60795 | 5973  | 46172604 | 4.27667E+11 | 1.29346E+11 | 1.72526E+16  | 2510350180  | 2927419073  | malate dehydrogenase (quinone) activity                      | Catalysis of the reaction: (S)-malate + a quinone = oxaloacetate + a quinol.                                                                                                                        |
| GO:0008924 | 3 | 10  | 26855 | 5973  | 46172604 | 3.7237E+11  | 1.29346E+11 | 1.52551E+16  | 3.13287E+16 | 8.30805E+15 | malate dehydrogenase (quinone) activity                      | Catalysis of the reaction: (S)-malate + a quinone = oxaloacetate + a quinol.                                                                                                                        |



|            |   |     |       |       |          |             |             |             |             |             |                                                                                  |                                                                                                                                                                                        |
|------------|---|-----|-------|-------|----------|-------------|-------------|-------------|-------------|-------------|----------------------------------------------------------------------------------|----------------------------------------------------------------------------------------------------------------------------------------------------------------------------------------|
| GO:0008925 | 1 | 37  | 60795 | 10420 | 46168157 | 6.08603E+11 | 2.25646E+12 | 1.43144E+16 | 1451022571  | 18527861224 | maltose O-acetyltransferase activity                                             | Catalysis of the reaction: acetyl-CoA + maltose = CoA + acetyl-maltose.                                                                                                                |
| GO:0008926 | 2 | 4   | 22861 | 1767  | 46176810 | 1.7497E+12  | 38264496543 | 2.19303E+15 | 1.22222E+16 | 2.58931E+16 | mannitol-1-phosphate 5-dehydrogenase activity                                    | Catalysis of the reaction: D-mannitol 1-phosphate + NAD+ = D-fructose 6-phosphate + NADH + H+.                                                                                         |
| GO:0008926 | 1 | 11  | 60795 | 1767  | 46176810 | 1.80936E+12 | 38264496543 | 2.2414E+16  | 31987398871 | 1.75732E+11 | mannitol-1-phosphate 5-dehydrogenase activity                                    | Catalysis of the reaction: D-mannitol 1-phosphate + NAD+ = D-fructose 6-phosphate + NADH + H+.                                                                                         |
| GO:0008927 | 2 | 13  | 22861 | 13007 | 46165570 | 5.68654E+11 | 2.81667E+11 | 1.01356E+16 | 1.49322E+16 | 3.05142E+15 | mannonate dehydratase activity                                                   | Catalysis of the reaction: D-mannonate = 2-dehydro-3-deoxy-D-gluconate + H(2)O.                                                                                                        |
| GO:0008927 | 1 | 44  | 60795 | 13007 | 46165570 | 7.23744E+11 | 2.81667E+11 | 1.36149E+16 | 40491933.41 | 607967974.7 | mannonate dehydratase activity                                                   | Catalysis of the reaction: D-mannonate = 2-dehydro-3-deoxy-D-gluconate + H(2)O.                                                                                                        |
| GO:0008927 | 3 | 19  | 26855 | 13007 | 46165570 | 7.07503E+11 | 2.81667E+11 | 1.32874E+16 | 3.33302E+11 | 1.22692E+16 | mannonate dehydratase activity                                                   | Catalysis of the reaction: D-mannonate = 2-dehydro-3-deoxy-D-gluconate + H(2)O.                                                                                                        |
| GO:0008929 | 1 | 47  | 60795 | 9190  | 46169387 | 7.7309E+11  | 1.9901E+12  | 1.9578E+16  | 20.6246177  | 12710.30544 | methylglyoxal synthase activity                                                  | Catalysis of the reaction: glycerone phosphate = methylglyoxal + phosphate.                                                                                                            |
| GO:0008935 | 2 | 19  | 22861 | 14497 | 46164080 | 8.3111E+11  | 3.13933E+11 | 1.40458E+16 | 1.75705E+12 | 7.19015E+11 | 1,4-dihydroxy-2-naphthoyl-CoA synthase activity                                  | Catalysis of the reaction: 4-(2-carboxyphenyl)-4-oxobutanoyl-CoA = 1,4-dihydroxy-2-naphthoyl-CoA + H2O.                                                                                |
| GO:0008936 | 2 | 20  | 22861 | 13377 | 46165200 | 8.74852E+11 | 2.8968E+12  | 1.59458E+16 | 2.06251E+11 | 1.23616E+12 | nicotinamidase activity                                                          | Catalysis of the reaction: nicotinamide + H2O = nicotinate + NH3.                                                                                                                      |
| GO:0008939 | 3 | 35  | 26855 | 24003 | 46154574 | 1.3033E+16  | 5.19786E+11 | 1.32617E+13 | 15651824962 | 14266310214 | nicotinate-nucleotide-dimethylbenzimidazole phosphoribosyltransferase activity   | Catalysis of the reaction: 5,6-dimethylbenzimidazole + nicotinate D-ribonucleotide = alpha-ribazole 5'-phosphate + H(+) + nicotinate.                                                  |
| GO:0008940 | 3 | 67  | 26855 | 43211 | 46135366 | 2.49488E+16 | 9.35737E+11 | 1.4148E+16  | 32512.99926 | 130336.0912 | nitrate reductase activity                                                       | Catalysis of the reaction: nitrite + acceptor = nitrate + reduced acceptor.                                                                                                            |
| GO:0008941 | 1 | 22  | 60795 | 6052  | 46172525 | 3.61872E+12 | 1.31056E+11 | 1.46529E+16 | 3.09564E+11 | 17110988686 | nitric oxide dioxygenase activity                                                | Catalysis of the reaction: 2 NO + 2 O2 + NADPH + H+ = 2 nitrate + NADP+.                                                                                                               |
| GO:0008941 | 3 | 9   | 26855 | 6052  | 46172525 | 3.35133E+12 | 1.31056E+11 | 1.35455E+16 | 1.01794E+16 | 2.22504E+16 | nitric oxide dioxygenase activity                                                | Catalysis of the reaction: 2 NO + 2 O2 + NADPH + H+ = 2 nitrate + NADP+.                                                                                                               |
| GO:0008948 | 1 | 138 | 60795 | 50765 | 46127812 | 2.26992E+16 | 1.09932E+16 | 1.04603E+16 | 1.682566036 | 10688.17718 | oxaloacetate decarboxylase activity                                              | Catalysis of the reaction: oxaloacetate = pyruvate + CO2.                                                                                                                              |
| GO:0008957 | 1 | 9   | 60795 | 3111  | 46175466 | 1.48038E+12 | 67368901385 | 1.13582E+16 | 2.42624E+16 | 4.53095E+14 | phenylacetaldehyde dehydrogenase activity                                        | Catalysis of the reaction: phenylacetaldehyde + NAD+ + H2O = phenylacetate + NADH + H+.                                                                                                |
| GO:0008959 | 1 | 69  | 60795 | 23621 | 46154956 | 1.13496E+16 | 5.11514E+11 | 1.1498E+14  | 3107977.071 | 60819134.24 | phosphate acetyltransferase activity                                             | Catalysis of the reaction: acetyl-CoA + phosphate = CoA + acetyl phosphate.                                                                                                            |
| GO:0008960 | 1 | 11  | 60795 | 1439  | 46177138 | 1.80936E+12 | 3.11616E+11 | 2.53764E+16 | 49011881433 | 37268887373 | phosphatidylglycerol-membrane-oligosaccharide glycerophosphotransferase activity | Catalysis of the reaction: phosphatidylglycerol + membrane-derived-oligosaccharide D-glucose = 1,2-diacyl-sn-glycerol + membrane-derived-oligosaccharide 6-(glycerophospho)-D-glucose. |
| GO:0008962 | 1 | 59  | 60795 | 22261 | 46156316 | 9.70475E+11 | 4.82063E+11 | 1.00947E+16 | 901335487.6 | 8777392048  | phosphatidylglycerophosphatase activity                                          | Catalysis of the reaction: phosphatidylglycerophosphate + H2O = phosphatidylglycerol + phosphate.                                                                                      |
| GO:0008962 | 3 | 26  | 26855 | 22261 | 46156316 | 96816235338 | 4.82063E+11 | 1.00603E+16 | 90543540265 | 2.89585E+16 | phosphatidylglycerophosphatase activity                                          | Catalysis of the reaction: phosphatidylglycerophosphate + H2O = phosphatidylglycerol + phosphate.                                                                                      |

|            |   |     |       |        |          |             |             |              |             |             |                                                                  |                                                                                                                                                                                                                                                                                                                                                        |
|------------|---|-----|-------|--------|----------|-------------|-------------|--------------|-------------|-------------|------------------------------------------------------------------|--------------------------------------------------------------------------------------------------------------------------------------------------------------------------------------------------------------------------------------------------------------------------------------------------------------------------------------------------------|
| GO:0008967 | 3 | 109 | 26855 | 77047  | 46101530 | 4.05883E+15 | 1.66846E+16 | 1.28255E+15  | 3.613925171 | 31.74871708 | phosphoglycolate phosphatase activity                            | Catalysis of the reaction: 2-phosphoglycolate + H(2)O = glycolate + phosphate.                                                                                                                                                                                                                                                                         |
| GO:0008970 | 1 | 17  | 60795 | 2886   | 46175691 | 2.79628E+11 | 62496512181 | 2.16166E+16  | 552827871.8 | 56084183851 | phospholipase A1 activity                                        | Catalysis of the reaction: phosphatidylcholine + H2O = 2-acylglycerophosphocholine + a carboxylate.                                                                                                                                                                                                                                                    |
| GO:0008970 | 3 | 8   | 26855 | 2886   | 46175691 | 2.97896E+11 | 62496512181 | 2.25296E+15  | 3.54217E+12 | 1.28662E+16 | phospholipase A1 activity                                        | Catalysis of the reaction: phosphatidylcholine + H2O = 2-acylglycerophosphocholine + a carboxylate.                                                                                                                                                                                                                                                    |
| GO:0008973 | 1 | 54  | 60795 | 10510  | 46168067 | 8.88231E+11 | 2.27595E+12 | 1.96447E+15  | 2.136044548 | 205.1099521 | phosphopentomutase activity                                      | Catalysis of the reaction: D-ribose 1-phosphate = D-ribose 5-phosphate.                                                                                                                                                                                                                                                                                |
| GO:0008974 | 1 | 19  | 60795 | 7150   | 46171427 | 3.12526E+11 | 1.54834E+12 | 1.01326E+16  | 3.8692E+16  | 9.92911E+14 | phosphoribulokinase activity                                     | Catalysis of the reaction: D-ribulose 5-phosphate + ATP = D-ribulose 1,5-bisphosphate + ADP + 2 H(+).                                                                                                                                                                                                                                                  |
| GO:0008974 | 3 | 14  | 26855 | 7150   | 46171427 | 5.21318E+11 | 1.54834E+12 | 1.75144E+16  | 1.12755E+12 | 5.00072E+11 | phosphoribulokinase activity                                     | Catalysis of the reaction: D-ribulose 5-phosphate + ATP = D-ribulose 1,5-bisphosphate + ADP + 2 H(+).                                                                                                                                                                                                                                                  |
| GO:0008980 | 1 | 3   | 60795 | 283    | 46178294 | 49346163336 | 6128382865  | 3.00936E+16  | 6.48419E+16 | 1.53958E+16 | propionate kinase activity                                       | Catalysis of the reaction: ATP + propanoate = ADP + propanoyl phosphate.                                                                                                                                                                                                                                                                               |
| GO:0008982 | 1 | 208 | 60795 | 76557  | 46102020 | 3.42133E+15 | 1.65785E+16 | 1.04525E+15  | 5.83232E-06 | 0.000891913 | protein-N(Pi)-phosphohistidine-sugar phosphotransferase activity | Catalysis of the PEP-dependent, phosphoryl transfer-driven transport of substances across a membrane. The transport happens by catalysis of the reaction: protein N-phosphohistidine + sugar(out) = protein histidine + sugar phosphate(in). This differs from primary and secondary active transport in that the solute is modified during transport. |
| GO:0008984 | 2 | 17  | 22861 | 73937  | 46104640 | 7436245134  | 1.60111E+15 | -1.10643E+16 | 2.41158E+11 | 9.38494E+11 | protein-glutamate methylesterase activity                        | Catalysis of the reaction: protein L-glutamate O(5)-methyl ester + H2O = protein L-glutamate + methanol.                                                                                                                                                                                                                                               |
| GO:0008994 | 1 | 5   | 60795 | 816    | 46177761 | 82243605560 | 17670531511 | 2.21856E+15  | 4.89355E+15 | 1.21281E+16 | rhamnulose-1-phosphate aldolase activity                         | Catalysis of the reaction: L-rhamnulose 1-phosphate = glycerone phosphate + (S)-lactaldehyde.                                                                                                                                                                                                                                                          |
| GO:0008998 | 1 | 43  | 60795 | 9142   | 46169435 | 7.07295E+11 | 1.97971E+11 | 1.83703E+16  | 36622.88978 | 14401.51542 | ribonucleoside-triphosphate reductase activity                   | Catalysis of the reaction: 2'-deoxyribonucleoside triphosphate + thioredoxin disulfide + H2O = ribonucleoside triphosphate + thioredoxin.                                                                                                                                                                                                              |
| GO:0008998 | 3 | 15  | 26855 | 9142   | 46169435 | 5.58555E+11 | 1.97971E+11 | 1.49641E+16  | 4.2265E+12  | 1.49925E+16 | ribonucleoside-triphosphate reductase activity                   | Catalysis of the reaction: 2'-deoxyribonucleoside triphosphate + thioredoxin disulfide + H2O = ribonucleoside triphosphate + thioredoxin.                                                                                                                                                                                                              |
| GO:0008999 | 1 | 192 | 60795 | 66892  | 46111685 | 3.15815E+15 | 1.44855E+16 | 1.12447E+16  | 6.23828E-06 | 0.001119906 | ribosomal-protein-alanine N-acetyltransferase activity           | Catalysis of the reaction: acetyl-CoA + ribosomal-protein L-alanine = CoA + ribosomal-protein N-acetyl-L-alanine.                                                                                                                                                                                                                                      |
| GO:0009001 | 3 | 65  | 26855 | 54115  | 46124462 | 2.42041E+16 | 1.17186E+16 | 1.04644E+16  | 1103316681  | 14601264666 | serine O-acetyltransferase activity                              | Catalysis of the reaction: L-serine + acetyl-CoA = O-acetyl-L-serine + CoA.                                                                                                                                                                                                                                                                            |
| GO:0009002 | 1 | 270 | 60795 | 100713 | 46077864 | 4.44115E+16 | 2.18095E+16 | 1.02598E+16  | 7.13489E-11 | 1.964E-08   | serine-type D-Ala-D-Ala carboxypeptidase activity                | Catalysis of the reaction: (Ac)2-L-Lys-D-alanyl-D-alanine + H2O = (Ac)2-L-Lys-D-alanine + D-alanine.                                                                                                                                                                                                                                                   |
| GO:0009012 | 1 | 3   | 60795 | 379    | 46178198 | 49346163336 | 8207268925  | 2.58796E+16  | 1.42338E+16 | 2.93539E+15 | aminoglycoside 3''-adenyltransferase activity                    | Catalysis of the reaction: ATP + streptomycin = 3''-                                                                                                                                                                                                                                                                                                   |

|            |   |    |       |       |          |             |             |             |             |             |                                                         |                                                                                                                                                                                                                                                                                   |
|------------|---|----|-------|-------|----------|-------------|-------------|-------------|-------------|-------------|---------------------------------------------------------|-----------------------------------------------------------------------------------------------------------------------------------------------------------------------------------------------------------------------------------------------------------------------------------|
| GO:0009012 | 2 | 3  | 22861 | 379   | 46178198 | 1.31228E+11 | 8207268925  | 3.99903E+16 | 9.5034E+11  | 3.01843E+15 | aminoglycoside 3''-adenylyltransferase activity         | adenylylstreptomycin + diphosphate + H(+).<br>Catalysis of the reaction: ATP + streptomycin = 3''-adenylylstreptomycin + diphosphate + H(+).                                                                                                                                      |
| GO:0009013 | 2 | 58 | 22861 | 51416 | 46127161 | 2.53707E+16 | 1.11342E+16 | 1.18817E+16 | 21623870.77 | 34606574.58 | succinate-semialdehyde dehydrogenase [NAD(P)+] activity | Catalysis of the reaction: succinate semialdehyde + NAD(P)+ + H2O = succinate + NAD(P)H + H+.                                                                                                                                                                                     |
| GO:0009013 | 3 | 81 | 26855 | 51416 | 46127161 | 3.0162E+15  | 1.11342E+16 | 1.43774E+16 | 8.805407898 | 577.1036382 | succinate-semialdehyde dehydrogenase [NAD(P)+] activity | Catalysis of the reaction: succinate semialdehyde + NAD(P)+ + H2O = succinate + NAD(P)H + H+.                                                                                                                                                                                     |
| GO:0009014 | 3 | 37 | 26855 | 31405 | 46147172 | 1.37777E+16 | 6.80077E+11 | 1.01856E+16 | 75684602970 | 3.63395E+12 | succinyl-diaminopimelate desuccinylase activity         | Catalysis of the reaction: N-succinyl-L-2,6-diaminopimelate + H(2)O = LL-2,6-diaminopimelate + succinate.                                                                                                                                                                         |
| GO:0009015 | 1 | 15 | 60795 | 4063  | 46174514 | 2.46731E+11 | 8798452148  | 1.48762E+16 | 4.4732E+11  | 1.57593E+16 | N-succinylarginine dihydrilase activity                 | Catalysis of the reaction: N(2)-succinyl-L-arginine + 2 H(2)O + 2 H(+)= N(2)-succinyl-L-ornithine + CO(2) + 2 NH(4)(+).                                                                                                                                                           |
| GO:0009017 | 1 | 16 | 60795 | 1784  | 46176793 | 2.6318E+11  | 3.86326E+11 | 2.76816E+16 | 43104.76011 | 7945515.825 | succinylglutamate desuccinylase activity                | Catalysis of the reaction: N-succinyl-L-glutamate + H(2)O = L-glutamate + succinate.                                                                                                                                                                                              |
| GO:0009018 | 1 | 11 | 60795 | 1343  | 46177234 | 1.80936E+12 | 2.90827E+11 | 2.63724E+15 | 25642301112 | 2.13032E+11 | sucrose phosphorylase activity                          | Catalysis of the reaction: sucrose + phosphate = D-fructose + alpha-D-glucose 1-phosphate.                                                                                                                                                                                        |
| GO:0009020 | 1 | 26 | 60795 | 7731  | 46170846 | 4.27667E+11 | 1.67415E+12 | 1.35306E+16 | 2.32283E+11 | 1.35591E+11 | tRNA (guanosine-2'-O-)-methyltransferase activity       | Catalysis of the reaction: S-adenosyl-L-methionine + tRNA = S-adenosyl-L-homocysteine + tRNA containing 2'-O-methylguanosine.                                                                                                                                                     |
| GO:0009026 | 1 | 20 | 60795 | 3728  | 46174849 | 3.28974E+12 | 80730075333 | 2.0268E+16  | 251691395.3 | 2927419073  | tagaturonate reductase activity                         | Catalysis of the reaction: D-altronate + NAD(+) = D-tagaturonate + H(+) + NADH.                                                                                                                                                                                                   |
| GO:0009027 | 3 | 25 | 26855 | 7826  | 46170751 | 93092533979 | 1.69473E+12 | 2.45761E+16 | 226133.8022 | 707353.386  | tartrate dehydrogenase activity                         | Catalysis of the reaction: tartrate + NAD+ = oxalloglycolate + NADH + H+.                                                                                                                                                                                                         |
| GO:0009027 | 2 | 11 | 22861 | 7826  | 46170751 | 4.81169E+11 | 1.69473E+12 | 1.50549E+16 | 2.22561E+16 | 6.23865E+16 | tartrate dehydrogenase activity                         | Catalysis of the reaction: tartrate + NAD+ = oxalloglycolate + NADH + H+.                                                                                                                                                                                                         |
| GO:0009032 | 2 | 13 | 22861 | 11204 | 46167373 | 5.68654E+11 | 2.42623E+12 | 1.22883E+16 | 4.74768E+15 | 1.18091E+16 | thymidine phosphorylase activity                        | Catalysis of the reaction: thymidine + phosphate = thymine + 2-deoxy-D-ribose 1-phosphate.                                                                                                                                                                                        |
| GO:0009032 | 3 | 17 | 26855 | 11204 | 46167373 | 6.33029E+11 | 2.42623E+12 | 1.38355E+15 | 4.38885E+11 | 1.54885E+16 | thymidine phosphorylase activity                        | Catalysis of the reaction: thymidine + phosphate = thymine + 2-deoxy-D-ribose 1-phosphate.                                                                                                                                                                                        |
| GO:0009034 | 1 | 11 | 60795 | 2426  | 46176151 | 1.80936E+12 | 52535183143 | 1.78412E+16 | 4.83679E+12 | 1.67402E+16 | tryptophanase activity                                  | Catalysis of the reaction: L-tryptophan + H(2)O = indole + NH(4)(+) + pyruvate.                                                                                                                                                                                                   |
| GO:0009036 | 2 | 3  | 22861 | 714   | 46177863 | 1.31228E+11 | 1.54617E+11 | 3.0853E+16  | 5.64151E+15 | 1.36701E+15 | type II site-specific deoxyribonuclease activity        | Catalysis of the endonucleolytic cleavage of DNA to give specific double-stranded fragments with terminal 5'-phosphates and 3' hydroxyls. Cleavage is dependent on the presence in the DNA of a specific recognition site; cleavage occurs at or very near this recognition site. |
| GO:0009038 | 1 | 8  | 60795 | 2296  | 46176281 | 1.3159E+11  | 49720024937 | 1.40415E+16 | 1.23426E+15 | 2.60411E+16 | undecaprenol kinase activity                            | Catalysis of the reaction: ATP + undecaprenol = ADP + undecaprenyl phosphate.                                                                                                                                                                                                     |
| GO:0009039 | 3 | 68 | 26855 | 36614 | 46141963 | 2.53212E+15 | 7928784813  | 1.67517E+15 | 0.640906527 | 518.8829514 | urease activity                                         | Catalysis of the reaction: urea + H2O = CO2 + 2 NH3.                                                                                                                                                                                                                              |
| GO:0009042 | 1 | 36 | 60795 | 10432 | 46168145 | 5.92154E+11 | 2.25906E+11 | 1.39025E+15 | 4087272315  | 4372110722  | valine-pyruvate transaminase activity                   | Catalysis of the reaction: L-valine + pyruvate = 3-methyl-2-oxobutanoate + L-alanine.                                                                                                                                                                                             |

|            |   |     |       |       |          |             |             |              |             |             |                                                                  |                                                                                                                                                                                                                                                                  |
|------------|---|-----|-------|-------|----------|-------------|-------------|--------------|-------------|-------------|------------------------------------------------------------------|------------------------------------------------------------------------------------------------------------------------------------------------------------------------------------------------------------------------------------------------------------------|
| GO:0009042 | 3 | 17  | 26855 | 10432 | 46168145 | 6.33029E+11 | 2.25906E+11 | 1.48655E+16  | 1.96954E+12 | 7.91099E+11 | valine-pyruvate transaminase activity                            | Catalysis of the reaction: L-valine + pyruvate = 3-methyl-2-oxobutanoate + L-alanine.                                                                                                                                                                            |
| GO:0009323 | 1 | 192 | 60795 | 66892 | 46111685 | 3.15815E+15 | 1.44855E+16 | 1.12447E+16  | 6.23828E-06 | 0.001119906 | ribosomal-protein-alanine N-acetyltransferase complex            | An enzyme complex that catalyzes the transfer of an acetyl group to ribosomal-protein alanine, forming ribosomal-protein acetylalanine.                                                                                                                          |
| GO:0009385 | 1 | 12  | 60795 | 2391  | 46176186 | 1.97385E+12 | 51777255934 | 1.93062E+16  | 1.09495E+12 | 4.87183E+12 | N-acylmannosamine-6-phosphate 2-epimerase activity               | Catalysis of the reaction: N-acetyl-D-mannosamine-6-phosphate = N-acetyl-D-glucosamine-6-phosphate.                                                                                                                                                              |
| GO:0010285 | 3 | 5   | 26855 | 20827 | 46157750 | 1.86185E+11 | 4.5101E+12  | -1.27642E+16 | 1.89175E+16 | 3.716E+15   | L,L-diaminopimelate aminotransferase activity                    | Catalysis of the reaction: 2-oxoglutarate + LL-2,6-diaminopimelate = (S)-2,3,4,5-tetrahydrodipicolinate + L-glutamate + H(2)O + H(+).                                                                                                                            |
| GO:0010285 | 2 | 1   | 22861 | 20827 | 46157750 | 4.37426E+11 | 4.5101E+12  | -3.36605E+16 | 3.74911E+12 | 1.34961E+16 | L,L-diaminopimelate aminotransferase activity                    | Catalysis of the reaction: 2-oxoglutarate + LL-2,6-diaminopimelate = (S)-2,3,4,5-tetrahydrodipicolinate + L-glutamate + H(2)O + H(+).                                                                                                                            |
| GO:0015044 | 1 | 8   | 60795 | 1324  | 46177253 | 1.3159E+11  | 2.86713E+11 | 2.19837E+16  | 4.50266E+12 | 1.58091E+16 | rubredoxin-NAD+ reductase activity                               | Catalysis of the reaction: reduced rubredoxin + NAD+ = oxidized rubredoxin + NADH + H+.                                                                                                                                                                          |
| GO:0015044 | 3 | 7   | 26855 | 1324  | 46177253 | 2.60659E+12 | 2.86713E+11 | 3.18448E+16  | 16076761699 | 1.01322E+12 | rubredoxin-NAD+ reductase activity                               | Catalysis of the reaction: reduced rubredoxin + NAD+ = oxidized rubredoxin + NADH + H+.                                                                                                                                                                          |
| GO:0015407 | 1 | 246 | 60795 | 87690 | 46090887 | 4.04639E+15 | 1.89893E+16 | 1.09145E+16  | 2.80629E-10 | 8.27655E-09 | ATPase-coupled monosaccharide transmembrane transporter activity | Enables the transfer of a solute or solutes from one side of a membrane to the other according to the reaction: ATP + H2O + monosaccharide(out) = ADP + phosphate + monosaccharide(in). Ribose, xylose, arabinose, galactose and methylgalactoside are imported. |
| GO:0015407 | 2 | 99  | 22861 | 87690 | 46090887 | 4.33052E+15 | 1.89893E+16 | 1.18935E+16  | 3216.729027 | 154440.3971 | ATPase-coupled monosaccharide transmembrane transporter activity | Enables the transfer of a solute or solutes from one side of a membrane to the other according to the reaction: ATP + H2O + monosaccharide(out) = ADP + phosphate + monosaccharide(in). Ribose, xylose, arabinose, galactose and methylgalactoside are imported. |
| GO:0015407 | 3 | 107 | 26855 | 87690 | 46090887 | 3.98436E+16 | 1.89893E+16 | 1.06916E+16  | 5148.467652 | 1986731.115 | ATPase-coupled monosaccharide transmembrane transporter activity | Enables the transfer of a solute or solutes from one side of a membrane to the other according to the reaction: ATP + H2O + monosaccharide(out) = ADP + phosphate + monosaccharide(in). Ribose, xylose, arabinose, galactose and methylgalactoside are imported. |
| GO:0015419 | 3 | 40  | 26855 | 20534 | 46158043 | 1.48948E+16 | 4.44665E+11 | 1.74402E+15  | 1312253.498 | 3495673.995 | ATPase-coupled sulfate transmembrane transporter activity        | Enables the transfer of a solute or solutes from one side of a membrane to the other according to the reaction: ATP + H2O + sulfate(out) = ADP + phosphate + sulfate(in).                                                                                        |
| GO:0015668 | 3 | 10  | 26855 | 2984  | 46175593 | 3.7237E+11  | 64618708368 | 2.52671E+16  | 1.40872E+11 | 9031991064  | type III site-specific deoxyribonuclease activity                | Catalysis of the endonucleolytic cleavage of DNA to give double-stranded fragments with terminal 5'-phosphates. ATP hydrolysis is required. Cleavage is dependent on the presence of two copies of a                                                             |

|            |   |    |       |       |          |             |             |              |             |             |                                                               |                                                                                                                                                                                                                        |
|------------|---|----|-------|-------|----------|-------------|-------------|--------------|-------------|-------------|---------------------------------------------------------------|------------------------------------------------------------------------------------------------------------------------------------------------------------------------------------------------------------------------|
| GO:0016034 | 1 | 15 | 60795 | 4572  | 46174005 | 2.46731E+11 | 99006948612 | 1.31734E+16  | 1.43064E+15 | 4.30549E+15 | maleylacetoacetate isomerase activity                         | specific recognition sequence in an inverse orientation in the DNA. Cleavage occurs at a specific distance from one of the recognition sites. Catalysis of the reaction: 4-maleylacetoacetate = 4-fumarylacetoacetate. |
| GO:0016034 | 3 | 14 | 26855 | 4572  | 46174005 | 5.21318E+11 | 99006948612 | 2.39656E+15  | 846138958.8 | 8278928344  | maleylacetoacetate isomerase activity                         | Catalysis of the reaction: 4-maleylacetoacetate = 4-fumarylacetoacetate.                                                                                                                                               |
| GO:0016153 | 2 | 25 | 22861 | 21986 | 46156591 | 1.09357E+16 | 4.76108E+12 | 1.19968E+16  | 1.6859E+12  | 69610700547 | urocanate hydratase activity                                  | Catalysis of the reaction: 4-imidazolone-5-propanoate + H(+) = trans-urocanate + H(2)O.                                                                                                                                |
| GO:0016154 | 3 | 2  | 26855 | 12972 | 46165605 | 74474027183 | 2.80909E+12 | -1.9153E+16  | 1.95499E+15 | 3.80223E+16 | pyrimidine-nucleoside phosphorylase activity                  | Catalysis of the reaction: pyrimidine nucleoside + phosphate = pyrimidine + alpha-D-ribose 1-phosphate.                                                                                                                |
| GO:0016159 | 1 | 7  | 60795 | 1497  | 46177080 | 1.15141E+12 | 32417629499 | 1.82855E+16  | 4.16223E+15 | 1.05629E+16 | muconolactone delta-isomerase activity                        | Catalysis of the reaction: 2,5-dihydro-5-oxofuran-2-acetate = 3,4-dihydro-5-oxofuran-2-acetate.                                                                                                                        |
| GO:0016163 | 3 | 45 | 26855 | 11050 | 46167527 | 1.67567E+16 | 2.39288E+12 | 2.80791E+16  | 3.2633E-08  | 7.48564E-06 | nitrogenase activity                                          | Catalysis of the reaction: 8 reduced ferredoxin + 8 H+ + nitrogen + 16 ATP = 8 oxidized ferredoxin + 2 NH3 + 16 ADP + 16 phosphate.                                                                                    |
| GO:0016213 | 2 | 11 | 22861 | 8411  | 46170166 | 4.81169E+11 | 1.82141E+12 | 1.40149E+16  | 3.80716E+16 | 9.79424E+15 | linoleoyl-CoA desaturase activity                             | Catalysis of the reaction: linoleoyl-CoA + reduced acceptor + O2 = gamma-linolenoyl-CoA + acceptor + 2 H2O.                                                                                                            |
| GO:0016213 | 1 | 28 | 60795 | 8411  | 46170166 | 4.60564E+12 | 1.82141E+12 | 1.33835E+16  | 1.38735E+11 | 89088445574 | linoleoyl-CoA desaturase activity                             | Catalysis of the reaction: linoleoyl-CoA + reduced acceptor + O2 = gamma-linolenoyl-CoA + acceptor + 2 H2O.                                                                                                            |
| GO:0016223 | 3 | 22 | 26855 | 8560  | 46170017 | 8.19214E+11 | 1.85367E+12 | 2.14385E+14  | 165163919.3 | 2706197709  | beta-alanine-pyruvate transaminase activity                   | Catalysis of the reaction: L-alanine + 2-oxopropanoate = pyruvate + beta-alanine.                                                                                                                                      |
| GO:0016403 | 2 | 6  | 22861 | 766   | 46177811 | 2.62456E+11 | 1.65878E+11 | 3.98388E+16  | 293485522.5 | 23880423809 | dimethylargininase activity                                   | Catalysis of the reaction: N(G),N(G)-dimethyl-L-arginine + H2O = dimethylamine + L-citrulline.                                                                                                                         |
| GO:0016412 | 3 | 65 | 26855 | 54115 | 46124462 | 2.42041E+16 | 1.17186E+16 | 1.04644E+16  | 1103316681  | 14601264666 | serine O-acyltransferase activity                             | Catalysis of the transfer of an acyl group to an oxygen atom on the serine molecule.                                                                                                                                   |
| GO:0016618 | 3 | 53 | 26855 | 28217 | 46150360 | 1.97356E+15 | 6.11041E+11 | 1.69146E+16  | 59.92737103 | 268956.6467 | hydroxypyruvate reductase activity                            | Catalysis of the reaction: D-glycerate + NADP+ = hydroxypyruvate + NADPH + H+.                                                                                                                                         |
| GO:0016760 | 2 | 7  | 22861 | 3868  | 46174709 | 3.06198E+12 | 83761784171 | 1.8701E+16   | 3.58197E+16 | 9.33121E+15 | cellulose synthase (UDP-forming) activity                     | Catalysis of the reaction: UDP-glucose + ((1,4)-beta-D-glucosyl)(n) = UDP + ((1,4)-beta-D-glucosyl)(n+1).                                                                                                              |
| GO:0016767 | 3 | 40 | 26855 | 31449 | 46147128 | 1.48948E+16 | 6.8103E+11  | 1.12902E+16  | 7527837893  | 52771549508 | geranylgeranyl-diphosphate geranylgeranyltransferase activity | Catalysis of the reaction: 2 geranylgeranyl diphosphate = diphosphate + prephytoene diphosphate.                                                                                                                       |
| GO:0016767 | 1 | 20 | 60795 | 31449 | 46147128 | 3.28974E+12 | 6.8103E+11  | -1.04974E+15 | 1.73329E+11 | 7.11407E+11 | geranylgeranyl-diphosphate geranylgeranyltransferase activity | Catalysis of the reaction: 2 geranylgeranyl diphosphate = diphosphate + prephytoene diphosphate.                                                                                                                       |
| GO:0016805 | 2 | 11 | 22861 | 4829  | 46173748 | 4.81169E+11 | 1.04572E+12 | 2.20204E+15  | 4122277594  | 2.18216E+12 | dipeptidase activity                                          | Catalysis of the hydrolysis of a dipeptide.                                                                                                                                                                            |
| GO:0016805 | 1 | 23 | 60795 | 4829  | 46173748 | 3.78321E+11 | 1.04572E+12 | 1.85511E+16  | 263412591.1 | 30380742704 | dipeptidase activity                                          | Catalysis of the hydrolysis of a dipeptide.                                                                                                                                                                            |
| GO:0016852 | 3 | 28 | 26855 | 12771 | 46165806 | 1.04264E+15 | 2.76557E+12 | 1.91459E+16  | 6160651.152 | 111080037.6 | sirohdrochlorin cobaltochelatase activity                     | Catalysis of the reaction: sirohdrochlorin + Co2+ = cobalt-sirohdrochlorin + 2 H+.                                                                                                                                     |

|            |   |    |       |       |          |             |             |              |             |             |                                                 |                                                                                                                                            |
|------------|---|----|-------|-------|----------|-------------|-------------|--------------|-------------|-------------|-------------------------------------------------|--------------------------------------------------------------------------------------------------------------------------------------------|
| GO:0016966 | 3 | 19 | 26855 | 4410  | 46174167 | 7.07503E+11 | 95498828385 | 2.88918E+15  | 41401.29726 | 12097933.38 | nitric oxide reductase activity                 | Catalysis of the reaction: H(2)O + 2 ferricytochrome c + nitrous oxide = 2 H(+) + 2 ferrocycytochrome c + 2 nitric oxide.                  |
| GO:0016966 | 2 | 6  | 22861 | 4410  | 46174167 | 2.62456E+11 | 95498828385 | 1.45852E+16  | 2.408E+16   | 4.49893E+15 | nitric oxide reductase activity                 | Catalysis of the reaction: H(2)O + 2 ferricytochrome c + nitrous oxide = 2 H(+) + 2 ferrocycytochrome c + 2 nitric oxide.                  |
| GO:0016980 | 1 | 7  | 60795 | 987   | 46177590 | 1.15141E+12 | 2.13735E+11 | 2.4295E+16   | 3.96783E+12 | 1.41975E+16 | creatinase activity                             | Catalysis of the reaction: creatine + H(2)O = sarcosine + urea.                                                                            |
| GO:0016980 | 3 | 3  | 26855 | 987   | 46177590 | 1.11711E+12 | 2.13735E+11 | 2.38587E+16  | 2.05836E+16 | 3.96223E+15 | creatinase activity                             | Catalysis of the reaction: creatine + H(2)O = sarcosine + urea.                                                                            |
| GO:0016980 | 2 | 5  | 22861 | 987   | 46177590 | 2.18713E+12 | 2.13735E+11 | 3.35514E+16  | 1.53527E+12 | 6.42915E+11 | creatinase activity                             | Catalysis of the reaction: creatine + H(2)O = sarcosine + urea.                                                                            |
| GO:0016984 | 2 | 12 | 22861 | 9205  | 46169372 | 5.24911E+11 | 1.99335E+11 | 1.39688E+16  | 2.6472E+15  | 7.18626E+15 | ribulose-bisphosphate carboxylase activity      | Catalysis of the reaction: D-ribulose 1,5-bisphosphate + CO2 + H2O = 2 3-phospho-D-glycerate.                                              |
| GO:0016984 | 3 | 18 | 26855 | 9205  | 46169372 | 6.70266E+11 | 1.99335E+11 | 1.74954E+16  | 1.31709E+11 | 85033055553 | ribulose-bisphosphate carboxylase activity      | Catalysis of the reaction: D-ribulose 1,5-bisphosphate + CO2 + H2O = 2 3-phospho-D-glycerate.                                              |
| GO:0016985 | 1 | 17 | 60795 | 4349  | 46174228 | 2.79628E+11 | 94177869535 | 1.57005E+16  | 1.00136E+11 | 4.56865E+12 | mannan endo-1,4-beta-mannosidase activity       | Catalysis of the random hydrolysis of (1->4)-beta-D-mannosidic linkages in mannans, galactomannans, glucomannans, and galactoglucomannans. |
| GO:0016990 | 1 | 34 | 60795 | 6369  | 46172208 | 5.59257E+11 | 1.37921E+12 | 2.01967E+15  | 24041.31175 | 740795.3448 | arginine deiminase activity                     | Catalysis of the reaction: L-arginine + H2O = L-citrulline + NH3.                                                                          |
| GO:0016990 | 2 | 10 | 22861 | 6369  | 46172208 | 4.37426E+11 | 1.37921E+12 | 1.6652E+16   | 1.57723E+16 | 4.64839E+15 | arginine deiminase activity                     | Catalysis of the reaction: L-arginine + H2O = L-citrulline + NH3.                                                                          |
| GO:0016993 | 1 | 44 | 60795 | 11906 | 46166671 | 7.23744E+11 | 2.57825E+11 | 1.48909E+15  | 3332378.028 | 64156938.52 | precorrin-8X methylmutase activity              | Catalysis of the reaction: precorrin-8X = hydrogenobyrrinate.                                                                              |
| GO:0016993 | 3 | 20 | 26855 | 11906 | 46166671 | 7.4474E+11  | 2.57825E+11 | 1.53034E+16  | 3.79298E+11 | 2.03393E+12 | precorrin-8X methylmutase activity              | Catalysis of the reaction: precorrin-8X = hydrogenobyrrinate.                                                                              |
| GO:0016994 | 1 | 42 | 60795 | 8618  | 46169959 | 69084628670 | 1.86623E+11 | 1.88824E+16  | 2153.969964 | 88056.8513  | precorrin-6A reductase activity                 | Catalysis of the reaction: precorrin-6B + NADP+ = precorrin-6A + NADPH + H+.                                                               |
| GO:0016994 | 3 | 11 | 26855 | 8618  | 46169959 | 4.09607E+12 | 1.86623E+11 | 1.13411E+16  | 1.38748E+16 | 2.87856E+15 | precorrin-6A reductase activity                 | Catalysis of the reaction: precorrin-6B + NADP+ = precorrin-6A + NADPH + H+.                                                               |
| GO:0016995 | 1 | 3  | 60795 | 6907  | 46171670 | 49346163336 | 1.49572E+11 | -1.59983E+15 | 1.98087E+15 | 3.84533E+16 | cholesterol oxidase activity                    | Catalysis of the reaction: cholesterol + O2 = cholest-5-en-3-one + H2O2.                                                                   |
| GO:0017040 | 1 | 4  | 60795 | 416   | 46178161 | 6579488445  | 9008506260  | 2.86862E+16  | 2.40306E+16 | 6.62808E+15 | N-acylsphingosine amidohydrolase activity       | Catalysis of the reaction: N-acylsphingosine + H2O = a fatty acid + sphingosine.                                                           |
| GO:0017061 | 1 | 14 | 60795 | 25104 | 46153473 | 2.30282E+12 | 5436287047  | -1.23922E+15 | 1.56702E+11 | 6.54881E+11 | S-methyl-5-thioadenosine phosphorylase activity | Catalysis of the reaction: 5'-methylthioadenosine + phosphate = adenine + 5-methylthio-D-ribose 1-phosphate.                               |
| GO:0017168 | 3 | 11 | 26855 | 8367  | 46170210 | 4.09607E+12 | 1.81188E+12 | 1.17675E+15  | 1.13898E+16 | 2.43997E+16 | 5-oxoprolinase (ATP-hydrolyzing) activity       | Catalysis of the reaction: 5-oxo-L-proline + ATP + 2 H(2)O = L-glutamate + ADP + 2 H(+) + phosphate.                                       |
| GO:0017168 | 1 | 4  | 60795 | 8367  | 46170210 | 6579488445  | 1.81188E+12 | -1.46144E+16 | 1.48963E+16 | 3.0464E+16  | 5-oxoprolinase (ATP-hydrolyzing) activity       | Catalysis of the reaction: 5-oxo-L-proline + ATP + 2 H(2)O = L-glutamate + ADP + 2 H(+) + phosphate.                                       |
| GO:0018454 | 2 | 15 | 22861 | 14076 | 46164501 | 6.56139E+11 | 3.04817E+12 | 1.10606E+15  | 5.47733E+15 | 1.3327E+16  | acetoacetyl-CoA reductase activity              | Catalysis of the reaction: (R)-3-hydroxyacyl-CoA + NADP+ = 3-oxoacyl-CoA + NADPH + H+.                                                     |

|            |   |    |       |       |          |             |             |             |             |             |                                                                       |                                                                                                                                           |
|------------|---|----|-------|-------|----------|-------------|-------------|-------------|-------------|-------------|-----------------------------------------------------------------------|-------------------------------------------------------------------------------------------------------------------------------------------|
| GO:0018454 | 3 | 28 | 26855 | 14076 | 46164501 | 1.04264E+15 | 3.04817E+12 | 1.77422E+16 | 45662845.04 | 666225749.7 | acetoacetyl-CoA reductase activity                                    | Catalysis of the reaction: (R)-3-hydroxyacetyl-CoA + NADP+ = 3-oxoacetyl-CoA + NADPH + H+.                                                |
| GO:0018456 | 2 | 4  | 22861 | 1247  | 46177330 | 1.7497E+12  | 27003863718 | 2.69587E+14 | 3.69943E+16 | 9.54683E+15 | aryl-alcohol dehydrogenase (NAD+) activity                            | Catalysis of the reaction: an aromatic alcohol + NAD+ = an aromatic aldehyde + NADH + H+.                                                 |
| GO:0018467 | 3 | 8  | 26855 | 2142  | 46176435 | 2.97896E+11 | 46385145216 | 2.68307E+15 | 4.7425E+11  | 24649038973 | formaldehyde dehydrogenase activity                                   | Catalysis of the reaction: formaldehyde + H(2)O + NAD(+) = formate + 2 H(+) + NADH.                                                       |
| GO:0018478 | 2 | 25 | 22861 | 22323 | 46156254 | 1.09357E+16 | 4.83406E+11 | 1.17773E+14 | 2.10912E+12 | 8.36559E+11 | malonate-semialdehyde dehydrogenase (acetylating) activity            | Catalysis of the reaction: 3-oxopropanoate + CoA + NADP+ = acetyl-CoA + CO2 + NADPH + H+.                                                 |
| GO:0018478 | 3 | 37 | 26855 | 22323 | 46156254 | 1.37777E+16 | 4.83406E+11 | 1.51103E+16 | 384978068.8 | 580136659.2 | malonate-semialdehyde dehydrogenase (acetylating) activity            | Catalysis of the reaction: 3-oxopropanoate + CoA + NADP+ = acetyl-CoA + CO2 + NADPH + H+.                                                 |
| GO:0018479 | 3 | 25 | 26855 | 1730  | 46176847 | 93092533979 | 3746325921  | 4.63512E+14 | 2.40495E-10 | 7.6385E-09  | benzaldehyde dehydrogenase (NAD+) activity                            | Catalysis of the reaction: benzaldehyde + NAD+ + H2O = benzoate + NADH + H+.                                                              |
| GO:0018479 | 2 | 5  | 22861 | 1730  | 46176847 | 2.18713E+12 | 3746325921  | 2.54549E+16 | 1.88734E+16 | 5.43813E+14 | benzaldehyde dehydrogenase (NAD+) activity                            | Catalysis of the reaction: benzaldehyde + NAD+ + H2O = benzoate + NADH + H+.                                                              |
| GO:0018480 | 3 | 9  | 26855 | 1344  | 46177233 | 3.35133E+12 | 2910440484  | 3.52542E+16 | 145386946.9 | 18527861224 | 5-carboxymethyl-2-hydroxy-muconic-semialdehyde dehydrogenase activity | Catalysis of the reaction: 5-carboxymethyl-2-hydroxy-muconate semialdehyde + H2O + NAD+ = 5-carboxymethyl-2-hydroxy-muconate + NADH + H+. |
| GO:0018489 | 1 | 20 | 60795 | 6317  | 46172260 | 3.28974E+12 | 1.36795E+12 | 1.26596E+16 | 4.04984E+12 | 1.44517E+16 | vanillate monooxygenase activity                                      | Catalysis of the reaction: H(+) + NADH + O(2) + vanillate = 3,4-dihydroxybenzoate + formaldehyde + H(2)O + NAD(+).                        |
| GO:0018489 | 3 | 30 | 26855 | 6317  | 46172260 | 1.11711E+16 | 1.36795E+12 | 3.02968E+15 | 0.009115936 | 11.76240607 | vanillate monooxygenase activity                                      | Catalysis of the reaction: H(+) + NADH + O(2) + vanillate = 3,4-dihydroxybenzoate + formaldehyde + H(2)O + NAD(+).                        |
| GO:0018489 | 2 | 19 | 22861 | 6317  | 46172260 | 8.3111E+11  | 1.36795E+12 | 2.60302E+16 | 10655289.51 | 236467747.7 | vanillate monooxygenase activity                                      | Catalysis of the reaction: H(+) + NADH + O(2) + vanillate = 3,4-dihydroxybenzoate + formaldehyde + H(2)O + NAD(+).                        |
| GO:0018517 | 3 | 1  | 26855 | 36    | 46178541 | 37237013592 | 779582272.5 | 5.57789E+14 | 2.0724E+16  | 3.97371E+15 | phthalate 4,5-cis-dihydrodiol dehydrogenase activity                  | Catalysis of the reaction: cis-4,5-dihydroxycyclohexa-2,6-diene-1,2-dicarboxylate + NAD(+) = 4,5-dihydroxyphthalate + H(+) + NADH.        |
| GO:0018548 | 3 | 5  | 26855 | 780   | 46177797 | 1.86185E+11 | 16890949238 | 3.46242E+15 | 1.08705E+12 | 4.8471E+12  | pentaerythritol trinitrate reductase activity                         | Catalysis of the reaction: pentaerythritol trinitrate + NADPH = NADP+ + nitrate + pentaerythritol dinitrate.                              |
| GO:0018576 | 1 | 15 | 60795 | 2094  | 46176483 | 2.46731E+11 | 4.53457E+11 | 2.4439E+15  | 2282006747  | 26947106558 | catechol 1,2-dioxygenase activity                                     | Catalysis of the reaction: catechol + O2 = cis,cis-muconate.                                                                              |
| GO:0018576 | 2 | 4  | 22861 | 2094  | 46176483 | 1.7497E+12  | 4.53457E+11 | 1.94807E+16 | 2.12831E+14 | 4.06842E+16 | catechol 1,2-dioxygenase activity                                     | Catalysis of the reaction: catechol + O2 = cis,cis-muconate.                                                                              |
| GO:0018577 | 2 | 16 | 22861 | 11812 | 46166765 | 6.99882E+11 | 2.5579E+12  | 1.45215E+15 | 3.8545E+12  | 1.38273E+14 | catechol 2,3-dioxygenase activity                                     | Catalysis of the reaction: catechol + O2 = 2-hydroxy-muconate semialdehyde.                                                               |
| GO:0018577 | 3 | 14 | 26855 | 11812 | 46166765 | 5.21318E+11 | 2.5579E+12  | 1.02721E+16 | 1.1025E+16  | 2.37715E+16 | catechol 2,3-dioxygenase activity                                     | Catalysis of the reaction: catechol + O2 = 2-hydroxy-muconate semialdehyde.                                                               |
| GO:0018578 | 3 | 16 | 26855 | 13755 | 46164822 | 5.95792E+11 | 2.97865E+12 | 1.00015E+15 | 8.19583E+15 | 1.87171E+16 | protocatechuate 3,4-dioxygenase activity                              | Catalysis of the reaction: 3,4-dihydroxybenzoate + O2 = 3-carboxy-cis,cis-muconate.                                                       |

|            |   |    |       |       |          |             |             |             |             |             |                                                                      |                                                                                                                                                |
|------------|---|----|-------|-------|----------|-------------|-------------|-------------|-------------|-------------|----------------------------------------------------------------------|------------------------------------------------------------------------------------------------------------------------------------------------|
| GO:0018579 | 3 | 33 | 26855 | 2975  | 46175602 | 1.22882E+16 | 64423812800 | 4.25354E+15 | 1.29356E-14 | 6.67641E-13 | protocatechuate 4,5-dioxygenase activity                             | Catalysis of the reaction: protocatechuate + O2 = 4-carboxy-2-hydroxymuconate semialdehyde.                                                    |
| GO:0018580 | 2 | 32 | 22861 | 31885 | 46146692 | 1.39976E+15 | 6.90472E+11 | 1.01953E+15 | 2.17414E+11 | 8.60692E+11 | nitronate monooxygenase activity                                     | Catalysis of the reaction: ethylnitronate + O(2) = acetaldehyde + nitrite.                                                                     |
| GO:0018580 | 3 | 55 | 26855 | 31885 | 46146692 | 2.04804E+16 | 6.90472E+11 | 1.56859E+16 | 55730.51221 | 2111112.706 | nitronate monooxygenase activity                                     | Catalysis of the reaction: ethylnitronate + O(2) = acetaldehyde + nitrite.                                                                     |
| GO:0018581 | 2 | 3  | 22861 | 750   | 46177827 | 1.31228E+11 | 1.62413E+11 | 3.01434E+16 | 6.45468E+14 | 1.53345E+16 | hydroxyquinol 1,2-dioxygenase activity                               | Catalysis of the reaction: benzene-1,2,4-triol + O2 = 3-hydroxy-cis,cis-muconate.                                                              |
| GO:0018597 | 3 | 3  | 26855 | 624   | 46177953 | 1.11711E+12 | 1.35128E+11 | 3.04738E+16 | 6.05976E+15 | 1.4488E+16  | ammonia monooxygenase activity                                       | Catalysis of the oxidation of alkanes (up to C8) to alcohols and alkenes (up to C5) to epoxides and alcohols in the presence of ammonium ions. |
| GO:0018618 | 1 | 5  | 60795 | 931   | 46177646 | 82243605560 | 2.01609E+11 | 2.02835E+15 | 8.38312E+15 | 1.90815E+15 | anthranilate 1,2-dioxygenase (deaminating, decarboxylating) activity | Catalysis of the reaction: anthranilate + NADPH + H+ + O2 = catechol + CO2 + NADP+ + NH3.                                                      |
| GO:0018618 | 2 | 4  | 22861 | 931   | 46177646 | 1.7497E+12  | 2.01609E+11 | 3.11748E+16 | 1.29745E+16 | 3.94491E+15 | anthranilate 1,2-dioxygenase (deaminating, decarboxylating) activity | Catalysis of the reaction: anthranilate + NADPH + H+ + O2 = catechol + CO2 + NADP+ + NH3.                                                      |
| GO:0018623 | 1 | 10 | 60795 | 1471  | 46177106 | 1.64487E+12 | 3.18546E+11 | 2.3684E+16  | 3.4937E+11  | 1.89559E+12 | benzoate 1,2-dioxygenase activity                                    | Catalysis of the reaction: benzoate + NADH + H+ + O2 = catechol + CO2 + NAD+.                                                                  |
| GO:0018623 | 3 | 6  | 26855 | 1471  | 46177106 | 2.23422E+12 | 3.18546E+11 | 2.8102E+16  | 2.6094E+11  | 1.00693E+16 | benzoate 1,2-dioxygenase activity                                    | Catalysis of the reaction: benzoate + NADH + H+ + O2 = catechol + CO2 + NAD+.                                                                  |
| GO:0018635 | 2 | 3  | 22861 | 1132  | 46177445 | 1.31228E+11 | 2.45135E+11 | 2.42042E+15 | 1.93509E+16 | 3.77599E+15 | (R)-limonene 1,2-monooxygenase activity                              | Catalysis of the reaction: (4R)-limonene + NAD(P)H + H+ + O2 = NAD(P)+ + H2O + (4R)-limonene-1,2-epoxide.                                      |
| GO:0018658 | 1 | 18 | 60795 | 5991  | 46172586 | 2.96077E+12 | 1.29735E+11 | 1.1904E+16  | 1.35726E+16 | 4.10859E+15 | salicylate 1-monooxygenase activity                                  | Catalysis of the reaction: salicylate + NADH + H+ + O2 = catechol + NAD+ + H2O + CO2.                                                          |
| GO:0018658 | 3 | 23 | 26855 | 5991  | 46172586 | 8.56451E+11 | 1.29735E+11 | 2.7228E+15  | 392.450713  | 1528706.598 | salicylate 1-monooxygenase activity                                  | Catalysis of the reaction: salicylate + NADH + H+ + O2 = catechol + NAD+ + H2O + CO2.                                                          |
| GO:0018658 | 2 | 12 | 22861 | 5991  | 46172586 | 5.24911E+11 | 1.29735E+11 | 2.0165E+16  | 63678434651 | 3.1793E+11  | salicylate 1-monooxygenase activity                                  | Catalysis of the reaction: salicylate + NADH + H+ + O2 = catechol + NAD+ + H2O + CO2.                                                          |
| GO:0018659 | 3 | 15 | 26855 | 5124  | 46173453 | 5.58555E+11 | 1.10961E+12 | 2.33165E+15 | 607709874.8 | 6120083105  | 4-hydroxybenzoate 3-monooxygenase activity                           | Catalysis of the reaction: 4-hydroxybenzoate + NADPH + H+ + O2 = protocatechuate + NADP+ + H2O.                                                |
| GO:0018673 | 3 | 11 | 26855 | 3624  | 46174953 | 4.09607E+12 | 78477948768 | 2.38388E+15 | 1.32624E+11 | 85430001605 | anthraniloyl-CoA monooxygenase activity                              | Catalysis of the reaction: 2-aminobenzoyl-CoA + 2 NADPH + 2 H+ + O2 = 2-amino-5-oxocyclohex-1-enecarboxyl-CoA + H2O + 2 NADP+.                 |
| GO:0018685 | 1 | 25 | 60795 | 3711  | 46174866 | 4.11218E+11 | 80361939260 | 2.35532E+16 | 94596.02271 | 25528560.64 | alkane 1-monooxygenase activity                                      | Catalysis of the reaction: octane + reduced rubredoxin + O2 = 1-octanol + oxidized rubredoxin + H2O.                                           |
| GO:0018685 | 2 | 9  | 22861 | 3711  | 46174866 | 3.93684E+12 | 80361939260 | 2.29245E+16 | 1.26735E+12 | 5.47372E+11 | alkane 1-monooxygenase activity                                      | Catalysis of the reaction: octane + reduced rubredoxin + O2 = 1-octanol + oxidized rubredoxin + H2O.                                           |
| GO:0018697 | 3 | 45 | 26855 | 11050 | 46167527 | 1.67567E+16 | 2.39288E+12 | 2.80791E+16 | 3.2633E-08  | 7.48564E-06 | carbonyl sulfide nitrogenase activity                                | Catalysis of the reaction: carbonyl sulfide + 2 H+ + 2 e- = hydrogen sulfide + carbon monoxide.                                                |
| GO:0018729 | 3 | 10 | 26855 | 1718  | 46176859 | 3.7237E+11  | 3.72034E+11 | 3.32323E+15 | 1080449743  | 14484340874 | propionate CoA-transferase activity                                  | Catalysis of the reaction: acetyl-CoA + propanoate = acetate + propanoyl-CoA.                                                                  |



|            |   |    |       |       |          |             |             |              |             |             |                                                             |                                                                                                                                                                                                                         |
|------------|---|----|-------|-------|----------|-------------|-------------|--------------|-------------|-------------|-------------------------------------------------------------|-------------------------------------------------------------------------------------------------------------------------------------------------------------------------------------------------------------------------|
| GO:0018730 | 3 | 14 | 26855 | 11360 | 46167217 | 5.21318E+11 | 2.46002E+12 | 1.0835E+15   | 8.07525E+15 | 1.85134E+16 | glutaconate CoA-transferase activity                        | Catalysis of the reaction: acetyl-CoA + (E)-glutaconate = acetate + glutaconyl-1-CoA.                                                                                                                                   |
| GO:0018738 | 1 | 30 | 60795 | 10720 | 46167857 | 4.93462E+11 | 2.32142E+12 | 1.08793E+16  | 1.53232E+12 | 6.42915E+11 | S-formylglutathione hydrolase activity                      | Catalysis of the reaction: S-formylglutathione + H(2)O = formate + glutathione + H(+).                                                                                                                                  |
| GO:0018738 | 3 | 23 | 26855 | 10720 | 46167857 | 8.56451E+11 | 2.32142E+12 | 1.88336E+16  | 1909520609  | 2312143869  | S-formylglutathione hydrolase activity                      | Catalysis of the reaction: S-formylglutathione + H(2)O = formate + glutathione + H(+).                                                                                                                                  |
| GO:0018739 | 3 | 12 | 26855 | 6530  | 46172047 | 4.46844E+12 | 1.41408E+12 | 1.65991E+16  | 5.85061E+11 | 1.95922E+15 | 4-hydroxybenzoyl-CoA thioesterase activity                  | Catalysis of the reaction: 4-hydroxybenzoyl-CoA + H(2)O = 4-hydroxybenzoate + CoA + H(+).                                                                                                                               |
| GO:0018740 | 1 | 4  | 60795 | 151   | 46178426 | 6579488445  | 3269914532  | 4.33065E+15  | 53569779834 | 2.73074E+11 | 2'-hydroxybiphenyl-2-sulfinate desulfinase activity         | Catalysis of the reaction: 2'-hydroxybiphenyl-2-sulfinate + H(2)O = biphenyl-2-ol + sulfite.                                                                                                                            |
| GO:0018740 | 2 | 2  | 22861 | 151   | 46178426 | 87485236866 | 3269914532  | 4.74171E+15  | 2.64263E+15 | 7.17855E+15 | 2'-hydroxybiphenyl-2-sulfinate desulfinase activity         | Catalysis of the reaction: 2'-hydroxybiphenyl-2-sulfinate + H(2)O = biphenyl-2-ol + sulfite.                                                                                                                            |
| GO:0018744 | 2 | 4  | 22861 | 1093  | 46177484 | 1.7497E+12  | 2.3669E+11  | 2.88604E+16  | 2.31637E+16 | 6.43486E+15 | limonene-1,2-epoxide hydrolase activity                     | Catalysis of the reaction: limonene-1,2-epoxide + H2O = limonene-1,2-diol. Other substrates include alicyclic and 1-methyl-substituted epoxides, such as 1-methylcyclohexene oxide, indene oxide and cyclohexene oxide. |
| GO:0018759 | 1 | 1  | 60795 | 4728  | 46173849 | 16448721112 | 1.02385E+12 | -2.63796E+15 | 1.42611E+15 | 2.93539E+15 | methenyltetrahydromethanopterin cyclohydrolase activity     | Catalysis of the reaction: 5,10-methenyl-5,6,7,8-tetrahydromethanopterin + H(2)O = N(5)-formyl-5,6,7,8-tetrahydromethanopterin + H(+).                                                                                  |
| GO:0018762 | 2 | 4  | 22861 | 1027  | 46177550 | 1.7497E+12  | 22239749830 | 2.9759E+15   | 1.85183E+16 | 5.35074E+15 | aliphatic nitrilase activity                                | Catalysis of the reaction: R-CN + H2O = R-COOH + NH3.                                                                                                                                                                   |
| GO:0018774 | 1 | 1  | 60795 | 21    | 46178556 | 16448721112 | 4547563256  | 5.17674E+15  | 2.7286E+16  | 4.97851E+16 | 2,6-dioxo-6-phenylhexa-3-enoate hydrolase activity          | Catalysis of the reaction: 2,6-dioxo-6-phenylhexa-3-enoate + H2O = benzoate + 2-oxopent-4-enoate.                                                                                                                       |
| GO:0018784 | 3 | 42 | 26855 | 17648 | 46160929 | 1.56395E+16 | 38216855405 | 2.03292E+14  | 92.5222612  | 4961.356058 | (S)-2-haloacid dehalogenase activity                        | Catalysis of the reaction: (S)-2-haloacid + H2O = (R)-2-hydroxyacid + halide.                                                                                                                                           |
| GO:0018784 | 2 | 18 | 22861 | 17648 | 46160929 | 7.87367E+11 | 38216855405 | 1.04283E+16  | 3.94813E+15 | 1.01065E+16 | (S)-2-haloacid dehalogenase activity                        | Catalysis of the reaction: (S)-2-haloacid + H2O = (R)-2-hydroxyacid + halide.                                                                                                                                           |
| GO:0018785 | 3 | 19 | 26855 | 4181  | 46174396 | 7.07503E+11 | 90539818929 | 2.96611E+14  | 170076.1408 | 552948.3349 | haloacetate dehalogenase activity                           | Catalysis of the reaction: haloacetate + H2O = glycolate + halide.                                                                                                                                                      |
| GO:0018785 | 2 | 6  | 22861 | 4181  | 46174396 | 2.62456E+11 | 90539818929 | 1.53545E+16  | 1.91835E+16 | 3.76288E+15 | haloacetate dehalogenase activity                           | Catalysis of the reaction: haloacetate + H2O = glycolate + halide.                                                                                                                                                      |
| GO:0018800 | 3 | 16 | 26855 | 1528  | 46177049 | 5.95792E+11 | 33088936456 | 4.17039E+15  | 2.909205848 | 2035.951008 | 5-oxopent-3-ene-1,2,5-tricarboxylate decarboxylase activity | Catalysis of the reaction: 5-oxopent-3-ene-1,2,5-tricarboxylate = 2-oxohept-3-enedioate + CO2.                                                                                                                          |
| GO:0018800 | 2 | 4  | 22861 | 1528  | 46177049 | 1.7497E+12  | 33088936456 | 2.40269E+16  | 7.48829E+15 | 1.74498E+16 | 5-oxopent-3-ene-1,2,5-tricarboxylate decarboxylase activity | Catalysis of the reaction: 5-oxopent-3-ene-1,2,5-tricarboxylate = 2-oxohept-3-enedioate + CO2.                                                                                                                          |
| GO:0018822 | 3 | 8  | 26855 | 5188  | 46173389 | 2.97896E+11 | 1.12346E+12 | 1.40685E+16  | 1.22469E+16 | 2.59054E+16 | nitrile hydratase activity                                  | Catalysis of the reaction: an aliphatic amide = a nitrile + H2O.                                                                                                                                                        |
| GO:0018822 | 2 | 8  | 22861 | 5188  | 46173389 | 3.49941E+16 | 1.12346E+12 | 1.63916E+16  | 4.95401E+15 | 1.22193E+16 | nitrile hydratase activity                                  | Catalysis of the reaction: an aliphatic amide = a nitrile + H2O.                                                                                                                                                        |
| GO:0018842 | 1 | 15 | 60795 | 3883  | 46174694 | 2.46731E+11 | 84086610118 | 1.55299E+16  | 2.81181E+12 | 1.07103E+16 | 3-carboxymuconate cycloisomerase type II activity           | Catalysis of the reaction: 3-sulfomuconate = 4-sulfolactone.                                                                                                                                                            |
| GO:0018842 | 3 | 11 | 26855 | 3883  | 46174694 | 4.09607E+12 | 84086610118 | 2.28429E+16  | 2.47648E+11 | 1.41537E+12 | 3-carboxymuconate cycloisomerase type II activity           | Catalysis of the reaction: 3-sulfomuconate = 4-sulfolactone.                                                                                                                                                            |
| GO:0018842 | 2 | 6  | 22861 | 3883  | 46174694 | 2.62456E+11 | 84086610118 | 1.64213E+16  | 1.38916E+14 | 2.87856E+15 | 3-carboxymuconate cycloisomerase type II activity           | Catalysis of the reaction: 3-sulfomuconate = 4-sulfolactone.                                                                                                                                                            |

|            |   |    |       |      |          |             |             |             |             |             |                                                         |                                                                                                                                      |
|------------|---|----|-------|------|----------|-------------|-------------|-------------|-------------|-------------|---------------------------------------------------------|--------------------------------------------------------------------------------------------------------------------------------------|
| GO:0018858 | 3 | 7  | 26855 | 1782 | 46176795 | 2.60659E+12 | 38589322490 | 2.75589E+16 | 1.02624E+12 | 4.66155E+12 | benzoate-CoA ligase activity                            | Catalysis of the reaction: ATP + benzoate + CoA = AMP + benzoyl-CoA + diphosphate + H(+).                                            |
| GO:0018860 | 3 | 9  | 26855 | 2015 | 46176562 | 3.35133E+12 | 43634952199 | 2.94118E+15 | 3964778240  | 31122755421 | anthranilate-CoA ligase activity                        | Catalysis of the reaction: ATP + anthranilate + CoA = AMP + diphosphate + anthranilyl-CoA.                                           |
| GO:0018860 | 2 | 4  | 22861 | 2015 | 46176562 | 1.7497E+12  | 43634952199 | 2.00356E+16 | 1.88047E+15 | 3.69913E+15 | anthranilate-CoA ligase activity                        | Catalysis of the reaction: ATP + anthranilate + CoA = AMP + diphosphate + anthranilyl-CoA.                                           |
| GO:0019133 | 1 | 8  | 60795 | 1399 | 46177178 | 1.3159E+11  | 30295433313 | 2.11888E+15 | 6.42875E+11 | 2.12865E+16 | choline monoxygenase activity                           | Catalysis of the reaction: choline + 2 reduced ferredoxin + O2 + 2 H+ = betaine aldehyde hydrate + 2 oxidized ferredoxin + H2O.      |
| GO:0019133 | 3 | 8  | 26855 | 1399 | 46177178 | 2.97896E+11 | 30295433313 | 3.29764E+15 | 22788964392 | 1.93215E+11 | choline monoxygenase activity                           | Catalysis of the reaction: choline + 2 reduced ferredoxin + O2 + 2 H+ = betaine aldehyde hydrate + 2 oxidized ferredoxin + H2O.      |
| GO:0019145 | 1 | 11 | 60795 | 1124 | 46177453 | 1.80936E+12 | 2.43403E+11 | 2.89406E+16 | 466215699.7 | 4861122788  | aminobutyraldehyde dehydrogenase activity               | Catalysis of the reaction: 4-aminobutanal + NAD+ + H2O = 4-aminobutanoate + NADH + 2 H+.                                             |
| GO:0019150 | 1 | 7  | 60795 | 292  | 46178285 | 1.15141E+12 | 63232784328 | 4.18659E+15 | 1649502010  | 20330727754 | D-ribulokinase activity                                 | Catalysis of the reaction: ATP + D-ribulose = ADP + D-ribulose 5-phosphate.                                                          |
| GO:0019151 | 1 | 8  | 60795 | 1774 | 46176803 | 1.3159E+11  | 3.84161E+11 | 1.77627E+16 | 2.81524E+16 | 7.59747E+15 | galactose 1-dehydrogenase activity                      | Catalysis of the reaction: D-galactose + NAD+ = D-galactono-1,4-lactone + NADH + H+.                                                 |
| GO:0019151 | 3 | 4  | 26855 | 1774 | 46176803 | 1.48948E+12 | 3.84161E+11 | 1.95503E+15 | 2.09516E+16 | 4.01062E+16 | galactose 1-dehydrogenase activity                      | Catalysis of the reaction: D-galactose + NAD+ = D-galactono-1,4-lactone + NADH + H+.                                                 |
| GO:0019152 | 1 | 33 | 60795 | 4582 | 46173995 | 54280779669 | 99223499243 | 2.45169E+16 | 17.60433196 | 11013.37677 | acetoin dehydrogenase activity                          | Catalysis of the reaction: acetoin + NAD+ = diacetyl + NADH + H+.                                                                    |
| GO:0019165 | 1 | 6  | 60795 | 475  | 46178102 | 98692326672 | 10286154985 | 3.26223E+16 | 47519627302 | 24649038973 | thiamine kinase activity                                | Catalysis of the reaction: ATP + thiamine = ADP + 2 H(+) + thiamine phosphate.                                                       |
| GO:0019172 | 1 | 5  | 60795 | 323  | 46178254 | 82243605560 | 6994585390  | 3.55559E+15 | 7935481424  | 3.75322E+12 | glyoxalase III activity                                 | Catalysis of the reaction: methylglyoxal + H2O = D-lactate.                                                                          |
| GO:0019180 | 1 | 7  | 60795 | 1632 | 46176945 | 1.15141E+12 | 35341063021 | 1.70398E+16 | 6.56153E+15 | 1.55526E+16 | dTDP-4-amino-4,6-dideoxygalactose transaminase activity | Catalysis of the reaction: 2-oxoglutarate + dTDP-4-amino-4,6-dideoxy-D-galactose = L-glutamate + dTDP-4-dehydro-6-deoxy-D-galactose. |
| GO:0019180 | 3 | 6  | 26855 | 1632 | 46176945 | 2.23422E+12 | 35341063021 | 2.66035E+16 | 4.50162E+11 | 1.58091E+16 | dTDP-4-amino-4,6-dideoxygalactose transaminase activity | Catalysis of the reaction: 2-oxoglutarate + dTDP-4-amino-4,6-dideoxy-D-galactose = L-glutamate + dTDP-4-dehydro-6-deoxy-D-galactose. |
| GO:0019875 | 2 | 8  | 22861 | 1824 | 46176753 | 3.49941E+16 | 39498835142 | 3.14723E+15 | 4869647570  | 37097370510 | 6-aminohexanoate-dimer hydrolase activity               | Catalysis of the reaction: N-(6-aminohexanoyl)-6-aminohexanoate + H2O = 2 6-aminohexanoate.                                          |
| GO:0019875 | 3 | 5  | 26855 | 1824 | 46176753 | 1.86185E+11 | 39498835142 | 2.23686E+15 | 4.66193E+15 | 1.16591E+16 | 6-aminohexanoate-dimer hydrolase activity               | Catalysis of the reaction: N-(6-aminohexanoyl)-6-aminohexanoate + H2O = 2 6-aminohexanoate.                                          |
| GO:0030058 | 3 | 14 | 26855 | 1852 | 46176725 | 5.21318E+11 | 4.01052E+11 | 3.7003E+14  | 113690.8637 | 3982716.404 | amine dehydrogenase activity                            | Catalysis of the reaction: R-CH2-NH2 + H2O + acceptor = R-CHO + NH3 + reduced acceptor.                                              |
| GO:0030267 | 1 | 27 | 60795 | 8199 | 46170378 | 4.44115E+12 | 1.7755E+12  | 1.32271E+16 | 2.34281E+11 | 1.36246E+12 | glyoxylate reductase (NADP) activity                    | Catalysis of the reaction: glycolate + NADP+ = glyoxylate + NADPH + H+.                                                              |
| GO:0030267 | 3 | 27 | 26855 | 8199 | 46170378 | 1.0054E+15  | 1.7755E+12  | 2.50147E+16 | 18687.78334 | 7794.12701  | glyoxylate reductase (NADP) activity                    | Catalysis of the reaction: glycolate + NADP+ = glyoxylate + NADPH + H+.                                                              |
| GO:0030267 | 2 | 13 | 22861 | 8199 | 46170378 | 5.68654E+11 | 1.7755E+12  | 1.67933E+16 | 3.11927E+12 | 1.16768E+16 | glyoxylate reductase (NADP) activity                    | Catalysis of the reaction: glycolate + NADP+ = glyoxylate + NADPH + H+.                                                              |

|            |   |    |       |       |          |             |             |              |             |             |                                                                         |                                                                                                                                                                                                                             |
|------------|---|----|-------|-------|----------|-------------|-------------|--------------|-------------|-------------|-------------------------------------------------------------------------|-----------------------------------------------------------------------------------------------------------------------------------------------------------------------------------------------------------------------------|
| GO:0030270 | 1 | 1  | 60795 | 4744  | 46173833 | 16448721112 | 1.02732E+12 | -2.64283E+16 | 1.40043E+16 | 2.89844E+16 | formylmethanofuran-tetrahydromethanopterin N-formyltransferase activity | Catalysis of the reaction: 5,6,7,8-tetrahydromethanopterin + N-formylmethanofuran + H(+) = N(5)-formyl-5,6,7,8-tetrahydromethanopterin + methanofuran.                                                                      |
| GO:0030283 | 1 | 3  | 60795 | 469   | 46178108 | 49346163336 | 1.01562E+11 | 2.28057E+16  | 2.47796E+16 | 4.60878E+15 | testosterone dehydrogenase [NAD(P)] activity                            | Catalysis of the reaction: testosterone + NAD(P)+ = androst-4-ene-3,17-dione + NAD(P)H + H+.                                                                                                                                |
| GO:0030340 | 1 | 3  | 60795 | 206   | 46178371 | 49346163336 | 4460943004  | 3.46752E+15  | 2.68448E+16 | 7.27311E+16 | hyaluronate lyase activity                                              | Catalysis of the reaction: hyaluronate = n 3-(4-deoxy-beta-D-gluc-4-enuronosyl)-N-acetyl-D-glucosamine.                                                                                                                     |
| GO:0030341 | 1 | 3  | 60795 | 284   | 46178293 | 49346163336 | 6150037928  | 3.00427E+15  | 6.54707E+15 | 1.55272E+16 | chondroitin AC lyase activity                                           | Catalysis of the eliminative degradation of polysaccharides containing 1,4-beta-D-hexosaminy and 1,3-beta-D-glucuronosyl linkages to disaccharides containing 4-deoxy-beta-D-gluc-4-enuronosyl groups.                      |
| GO:0030429 | 2 | 23 | 22861 | 14108 | 46164469 | 1.00608E+16 | 3.0551E+11  | 1.71946E+16  | 12869024003 | 1.19676E+11 | kynureninase activity                                                   | Catalysis of the reaction: L-kynurenine + H2O = anthranilate + L-alanine.                                                                                                                                                   |
| GO:0030429 | 1 | 39 | 60795 | 14108 | 46164469 | 6.415E+11   | 3.0551E+11  | 1.07023E+16  | 2.32827E+11 | 1.35591E+11 | kynureninase activity                                                   | Catalysis of the reaction: L-kynurenine + H2O = anthranilate + L-alanine.                                                                                                                                                   |
| GO:0030599 | 1 | 19 | 60795 | 3767  | 46174810 | 3.12526E+11 | 8157462280  | 1.93778E+15  | 12142329548 | 1.14204E+11 | pectinesterase activity                                                 | Catalysis of the reaction: pectin + n H2O = n methanol + pectate.                                                                                                                                                           |
| GO:0030600 | 3 | 14 | 26855 | 2433  | 46176144 | 5.21318E+11 | 5.26868E+11 | 3.30665E+15  | 383428.9421 | 9653525.013 | feruloyl esterase activity                                              | Catalysis of the reaction: feruloyl-polysaccharide + H2O = ferulate + polysaccharide.                                                                                                                                       |
| GO:0030600 | 2 | 8  | 22861 | 2433  | 46176144 | 3.49941E+16 | 5.26868E+11 | 2.7316E+15   | 37600786108 | 2.02153E+11 | feruloyl esterase activity                                              | Catalysis of the reaction: feruloyl-polysaccharide + H2O = ferulate + polysaccharide.                                                                                                                                       |
| GO:0030697 | 1 | 20 | 60795 | 3681  | 46174896 | 3.28974E+12 | 79712287366 | 2.0451E+14   | 2068495257  | 24755991061 | S-adenosylmethionine-dependent tRNA (m5U54) methyltransferase activity  | Catalysis of the reaction: S-adenosyl-L-methionine + tRNA = S-adenosyl-L-homocysteine + tRNA containing thymine at position U54 of a transfer RNA. This occurs in most Gram-negative bacteria, some archae, and eukaryotes. |
| GO:0030697 | 3 | 8  | 26855 | 3681  | 46174896 | 2.97896E+11 | 79712287366 | 1.90194E+16  | 1.66495E+16 | 4.85835E+15 | S-adenosylmethionine-dependent tRNA (m5U54) methyltransferase activity  | Catalysis of the reaction: S-adenosyl-L-methionine + tRNA = S-adenosyl-L-homocysteine + tRNA containing thymine at position U54 of a transfer RNA. This occurs in most Gram-negative bacteria, some archae, and eukaryotes. |
| GO:0030701 | 3 | 9  | 26855 | 1398  | 46177179 | 3.35133E+12 | 3.02738E+11 | 3.46859E+16  | 20172839.38 | 24280187508 | NAD+-dinitrogen-reductase ADP-D-ribosyltransferase activity             | Catalysis of the reaction: NAD+ + [dinitrogen reductase] = nicotinamide + ADP-D-ribosyl-[dinitrogen reductase].                                                                                                             |
| GO:0030729 | 3 | 18 | 26855 | 10011 | 46168566 | 6.70266E+11 | 21678883695 | 1.62844E+15  | 38656844458 | 2.06768E+12 | acetoacetate-CoA ligase activity                                        | Catalysis of the reaction: acetoacetate + ATP + CoA = acetoacetyl-CoA + AMP + diphosphate + H(+).                                                                                                                           |
| GO:0030788 | 1 | 44 | 60795 | 11479 | 46167098 | 7.23744E+11 | 2.48578E+12 | 1.54178E+16  | 11474912.64 | 248062378.5 | precorrin-2 C20-methyltransferase activity                              | Catalysis of the reaction: S-adenosyl-L-methionine + precorrin-2 = S-adenosyl-L-homocysteine + H(+)+ precorrin-3A.                                                                                                          |
| GO:0030788 | 3 | 20 | 26855 | 11479 | 46167098 | 7.4474E+11  | 2.48578E+12 | 1.58304E+16  | 2.30217E+11 | 1.34832E+12 | precorrin-2 C20-methyltransferase activity                              | Catalysis of the reaction: S-adenosyl-L-methionine + precorrin-2 = S-                                                                                                                                                       |

|            |   |     |       |       |          |             |             |              |             |             |                                                             |                                                                                                                                                                                     |
|------------|---|-----|-------|-------|----------|-------------|-------------|--------------|-------------|-------------|-------------------------------------------------------------|-------------------------------------------------------------------------------------------------------------------------------------------------------------------------------------|
| GO:0030789 | 1 | 44  | 60795 | 11238 | 46167339 | 7.23744E+11 | 2.4336E+12  | 1.57239E+16  | 612194.2694 | 144442865   | precorrin-3B C17-methyltransferase activity                 | adenosyl-L-homocysteine + H(+) + precorrin-3A.<br>Catalysis of the reaction: S-adenosyl-L-methionine + precorrin-3B = S-adenosyl-L-homocysteine + precorrin 4.                      |
| GO:0030789 | 3 | 20  | 26855 | 11238 | 46167339 | 7.4474E+11  | 2.4336E+12  | 1.61365E+16  | 1.71606E+11 | 1.05441E+12 | precorrin-3B C17-methyltransferase activity                 | Catalysis of the reaction: S-adenosyl-L-methionine + precorrin-3B = S-adenosyl-L-homocysteine + precorrin 4.                                                                        |
| GO:0031218 | 1 | 12  | 60795 | 1430  | 46177147 | 1.97385E+12 | 3.09667E+11 | 2.67222E+16  | 710692775   | 7122452593  | arabinogalactan endo-1,4-beta-galactosidase activity        | Catalysis of the endohydrolysis of (1->4)-beta-D-galactosidic linkages in arabinogalactans.                                                                                         |
| GO:0031299 | 1 | 11  | 60795 | 836   | 46177741 | 1.80936E+12 | 18103632773 | 3.32113E+15  | 249301705.6 | 3913941986  | taurine-pyruvate aminotransferase activity                  | Catalysis of the reaction: pyruvate + taurine = L-alanine + sulfoacetaldehyde.                                                                                                      |
| GO:0032450 | 1 | 107 | 60795 | 35681 | 46142896 | 1.76001E+16 | 7.72674E+11 | 1.18765E+16  | 40.8196145  | 2247.255844 | maltose alpha-glucosidase activity                          | Catalysis of the reaction: alpha-maltose + H2O = 2 alpha-D-glucose.                                                                                                                 |
| GO:0033094 | 1 | 5   | 60795 | 732   | 46177845 | 82243605560 | 1.58515E+11 | 2.37528E+15  | 3.10532E+16 | 8.24558E+15 | butane-1,4-diamine:2-oxoglutarate aminotransferase activity | Catalysis of the reaction: putrescine + 2-oxoglutarate = L-glutamate + 1-pyrroline + H2O.                                                                                           |
| GO:0033608 | 3 | 16  | 26855 | 12502 | 46166075 | 5.95792E+11 | 2.70732E+11 | 1.13795E+15  | 3.43715E+16 | 8.99365E+15 | formyl-CoA transferase activity                             | Catalysis of the reaction: formyl-CoA + oxalate = formate + oxalyl-CoA.                                                                                                             |
| GO:0033608 | 2 | 21  | 22861 | 12502 | 46166075 | 9.18595E+11 | 2.70732E+11 | 1.76257E+16  | 23077216646 | 19525784330 | formyl-CoA transferase activity                             | Catalysis of the reaction: formyl-CoA + oxalate = formate + oxalyl-CoA.                                                                                                             |
| GO:0033711 | 1 | 20  | 60795 | 3475  | 46175102 | 3.28974E+12 | 75251344363 | 2.12819E+15  | 84125021.4  | 11578407112 | 4-phosphoerythronate dehydrogenase activity                 | Catalysis of the reaction: 4-phospho-D-erythronate + NAD(+) = (R)-3-hydroxy-2-oxo-4-phosphonoxybutanoate + H(+) + NADH.                                                             |
| GO:0033721 | 2 | 13  | 22861 | 11291 | 46167286 | 5.68654E+11 | 2.44507E+11 | 1.21767E+16  | 5.05183E+15 | 1.23939E+16 | aldehyde dehydrogenase (NADP+) activity                     | Catalysis of the reaction: an aldehyde + NADP+ + H2O = an acid + NADPH + H+.                                                                                                        |
| GO:0033721 | 1 | 32  | 60795 | 11291 | 46167286 | 5.26359E+11 | 2.44507E+11 | 1.10617E+16  | 75688956518 | 3.63395E+12 | aldehyde dehydrogenase (NADP+) activity                     | Catalysis of the reaction: an aldehyde + NADP+ + H2O = an acid + NADPH + H+.                                                                                                        |
| GO:0033726 | 3 | 14  | 26855 | 10584 | 46167993 | 5.21318E+11 | 2.29197E+11 | 1.18557E+16  | 4.49385E+15 | 1.13141E+16 | aldehyde ferredoxin oxidoreductase activity                 | Catalysis of the reaction: an aldehyde + H2O + 2 oxidized ferredoxin = an acid + 2 H+ + 2 reduced ferredoxin.                                                                       |
| GO:0033726 | 1 | 3   | 60795 | 10584 | 46167993 | 49346163336 | 2.29197E+11 | -2.21558E+16 | 4.96616E+11 | 1.70877E+15 | aldehyde ferredoxin oxidoreductase activity                 | Catalysis of the reaction: an aldehyde + H2O + 2 oxidized ferredoxin = an acid + 2 H+ + 2 reduced ferredoxin.                                                                       |
| GO:0033732 | 3 | 17  | 26855 | 5663  | 46172914 | 6.33029E+11 | 1.22633E+12 | 2.36793E+16  | 78856815.67 | 10926167514 | pyrroloquinoline-quinone synthase activity                  | Catalysis of the reaction: 6-(2-amino-2-carboxyethyl)-7,8-dioxo-1,2,3,4,7,8-hexahydroquinoline-2,4-dicarboxylate + 3 O(2) = 2 H(2)O + 2 H(2)O(2) + H(+) + pyrroloquinoline quinone. |
| GO:0033735 | 2 | 4   | 22861 | 1527  | 46177050 | 1.7497E+12  | 3.30673E+11 | 2.40364E+15  | 7.47156E+15 | 1.74294E+16 | aspartate dehydrogenase activity                            | Catalysis of the reaction: L-aspartate + H2O + NAD(P)+ = oxaloacetate + NH3 + NAD(P)H + H+.                                                                                         |
| GO:0033737 | 1 | 11  | 60795 | 1124  | 46177453 | 1.80936E+12 | 2.43403E+11 | 2.89406E+16  | 466215699.7 | 4861122788  | 1-pyrroline dehydrogenase activity                          | Catalysis of the reaction: 1-pyrroline + NAD+ + 2 H2O = 4-aminobutanoate + NADH + 2 H+.                                                                                             |
| GO:0033748 | 3 | 44  | 26855 | 15462 | 46163115 | 1.63843E+16 | 3.34831E+12 | 2.29081E+16  | 0.512106911 | 55.64445881 | hydrogenase (acceptor) activity                             | Catalysis of the reaction: H2 + A = AH2.                                                                                                                                            |
| GO:0033797 | 1 | 4   | 60795 | 748   | 46177829 | 6579488445  | 1.6198E+11  | 2.02216E+16  | 1.79879E+16 | 3.56734E+15 | selenate reductase activity                                 | Catalysis of the reaction: 2 e(-) + 2 H(+) + selenate = H(2)O + selenite.                                                                                                           |
| GO:0033816 | 1 | 6   | 60795 | 1626  | 46176951 | 98692326672 | 35211132643 | 1.48691E+16  | 2.21065E+16 | 4.19668E+16 | diaminobutyrate acetyltransferase activity                  | Catalysis of the reaction: L-2,4-diaminobutyrate + acetyl-CoA = N(4)-                                                                                                               |

|            |   |    |       |       |          |             |             |             |             |             |                                                            |                                                                                                                                                                       |
|------------|---|----|-------|-------|----------|-------------|-------------|-------------|-------------|-------------|------------------------------------------------------------|-----------------------------------------------------------------------------------------------------------------------------------------------------------------------|
| GO:0033816 | 3 | 6  | 26855 | 1626  | 46176951 | 2.23422E+12 | 35211132643 | 2.66567E+16 | 4.41603E+12 | 1.55711E+16 | diaminobutyrate acetyltransferase activity                 | acetyl-L-2,4-diaminobutyrate + CoA + H(+).<br>Catalysis of the reaction: L-2,4-diaminobutyrate + acetyl-CoA = N(4)-acetyl-L-2,4-diaminobutyrate + CoA + H(+).         |
| GO:0033850 | 2 | 8  | 22861 | 2927  | 46175650 | 3.49941E+16 | 63384369770 | 2.46491E+16 | 1.33479E+11 | 5.72905E+11 | Z-farnesyl diphosphate synthase activity                   | Catalysis of the reaction: geranyl diphosphate + isopentenyl diphosphate = 2-cis,6-trans-farnesyl diphosphate + diphosphate.                                          |
| GO:0033863 | 3 | 16 | 26855 | 3686  | 46174891 | 5.95792E+11 | 79820562682 | 2.89998E+15 | 12377841.73 | 26209286.4  | ribose 1,5-bisphosphate phosphokinase activity             | Catalysis of the reaction: D-ribose 1,5-diphosphate + ATP = 5-phospho-alpha-D-ribose 1-diphosphate + ADP + H(+).                                                      |
| GO:0033969 | 1 | 4  | 60795 | 318   | 46178259 | 6579488445  | 6886310074  | 3.25617E+16 | 9.04189E+11 | 2.8941E+15  | gamma-glutamyl-gamma-aminobutyrate hydrolase activity      | Catalysis of the reaction: 4-(L-gamma-glutamylamino)butanoate + H(2)O = 4-aminobutanoate + L-glutamate.                                                               |
| GO:0033971 | 1 | 30 | 60795 | 9240  | 46169337 | 4.93462E+11 | 2.00093E+11 | 1.30227E+16 | 1.11973E+11 | 74691093129 | hydroxyisourate hydrolase activity                         | Catalysis of the reaction: 5-hydroxyisourate + H(2)O = 5-hydroxy-2-oxo-4-ureido-2,5-dihydro-1H-imidazole-5-carboxylate + H(+).                                        |
| GO:0033971 | 3 | 20 | 26855 | 9240  | 46169337 | 7.4474E+11  | 2.00093E+11 | 1.89607E+16 | 10117179518 | 973749049.6 | hydroxyisourate hydrolase activity                         | Catalysis of the reaction: 5-hydroxyisourate + H(2)O = 5-hydroxy-2-oxo-4-ureido-2,5-dihydro-1H-imidazole-5-carboxylate + H(+).                                        |
| GO:0033971 | 2 | 10 | 22861 | 9240  | 46169337 | 4.37426E+11 | 2.00093E+11 | 1.12837E+16 | 1.88409E+16 | 3.70271E+15 | hydroxyisourate hydrolase activity                         | Catalysis of the reaction: 5-hydroxyisourate + H(2)O = 5-hydroxy-2-oxo-4-ureido-2,5-dihydro-1H-imidazole-5-carboxylate + H(+).                                        |
| GO:0033982 | 1 | 6  | 60795 | 546   | 46178031 | 98692326672 | 1.18237E+11 | 3.06126E+15 | 1.01692E+12 | 4.6243E+11  | 3-dehydro-L-gulonate-6-phosphate decarboxylase activity    | Catalysis of the reaction: 3-dehydro-L-gulonate 6-phosphate + H(+) = L-xylulose 5-phosphate + CO(2).                                                                  |
| GO:0033983 | 1 | 7  | 60795 | 1706  | 46176871 | 1.15141E+12 | 3.69435E+11 | 1.64001E+16 | 8.24813E+15 | 1.88158E+16 | diaminobutyrate decarboxylase activity                     | Catalysis of the reaction: L-2,4-diaminobutyrate + H(+) = 1,3-diaminopropane + CO(2).                                                                                 |
| GO:0033990 | 3 | 6  | 26855 | 1723  | 46176854 | 2.23422E+12 | 3.73117E+11 | 2.58207E+14 | 5.9654E+11  | 1.98959E+15 | ectoine synthase activity                                  | Catalysis of the reaction: N(4)-acetyl-L-2,4-diaminobutyrate = ectoine + H(2)O.                                                                                       |
| GO:0034013 | 2 | 2  | 22861 | 181   | 46178396 | 87485236866 | 3919566426  | 4.48027E+15 | 3.76398E+16 | 9.7013E+15  | aliphatic aldoxime dehydratase activity                    | Catalysis of the reaction: an aliphatic aldoxime = an aliphatic nitrile + H2O.                                                                                        |
| GO:0034017 | 1 | 29 | 60795 | 8003  | 46170574 | 4.77013E+12 | 1.73305E+11 | 1.46071E+15 | 20385672207 | 1.7871E+11  | trans-2-decenoyl-acyl-carrier-protein isomerase activity   | Catalysis of the reaction: trans-dec-2-enoyl-[acyl-carrier protein] = cis-dec-3-enoyl-[acyl-carrier protein].                                                         |
| GO:0034017 | 3 | 14 | 26855 | 8003  | 46170574 | 5.21318E+11 | 1.73305E+11 | 1.58885E+15 | 3.48041E+11 | 1.27512E+16 | trans-2-decenoyl-acyl-carrier-protein isomerase activity   | Catalysis of the reaction: trans-dec-2-enoyl-[acyl-carrier protein] = cis-dec-3-enoyl-[acyl-carrier protein].                                                         |
| GO:0034024 | 1 | 11 | 60795 | 575   | 46178002 | 1.80936E+12 | 12451661297 | 3.86107E+15 | 539140.6084 | 129425091.4 | glutamate-putrescine ligase activity                       | Catalysis of the reaction: L-glutamate + ATP + putrescine = gamma-L-glutamylputrescine + ADP + 2 H(+) + phosphate.                                                    |
| GO:0034028 | 2 | 40 | 22861 | 35441 | 46143136 | 1.7497E+16  | 7.67477E+11 | 1.18892E+16 | 29137710043 | 2.38039E+11 | 5-(carboxyamino)imidazole ribonucleotide synthase activity | Catalysis of the reaction: 5-amino-1-(5-phospho-D-ribosyl)imidazole + ATP + bicarbonate = 5-carboxyamino-1-(5-phospho-D-ribosyl)imidazole + ADP + 3 H(+) + phosphate. |
| GO:0034386 | 2 | 23 | 22861 | 21271 | 46157306 | 1.00608E+16 | 4.60625E+11 | 1.12708E+16 | 5.87693E+11 | 1.96644E+15 | 4-aminobutyrate:2-oxoglutarate transaminase activity       | Catalysis of the reaction: 4-aminobutanoate + 2-oxoglutarate = succinate semialdehyde + L-glutamate.                                                                  |

|            |   |    |       |       |          |             |             |              |             |             |                                                                                               |                                                                                                                                                                                                                                                                                                                                                                                                                                                         |
|------------|---|----|-------|-------|----------|-------------|-------------|--------------|-------------|-------------|-----------------------------------------------------------------------------------------------|---------------------------------------------------------------------------------------------------------------------------------------------------------------------------------------------------------------------------------------------------------------------------------------------------------------------------------------------------------------------------------------------------------------------------------------------------------|
| GO:0034386 | 3 | 38 | 26855 | 21271 | 46157306 | 1.41501E+16 | 4.60625E+11 | 1.61914E+16  | 37246866.13 | 70872032.37 | 4-aminobutyrate:2-oxoglutarate transaminase activity                                          | Catalysis of the reaction: 4-aminobutanoate + 2-oxoglutarate = succinate semialdehyde + L-glutamate.                                                                                                                                                                                                                                                                                                                                                    |
| GO:0034545 | 3 | 27 | 26855 | 9315  | 46169262 | 1.0054E+15  | 2.01717E+12 | 2.31736E+16  | 31662.69713 | 968409.4551 | fumarylpyruvate hydrolase activity                                                            | Catalysis of the reaction: fumarylpyruvate + H <sub>2</sub> O = fumarate + pyruvate + H <sup>+</sup> .                                                                                                                                                                                                                                                                                                                                                  |
| GO:0034545 | 2 | 12 | 22861 | 9315  | 46169262 | 5.24911E+11 | 2.01717E+12 | 1.37974E+16  | 2.90825E+16 | 7.81273E+15 | fumarylpyruvate hydrolase activity                                                            | Catalysis of the reaction: fumarylpyruvate + H <sub>2</sub> O = fumarate + pyruvate + H <sup>+</sup> .                                                                                                                                                                                                                                                                                                                                                  |
| GO:0034856 | 3 | 5  | 26855 | 874   | 46177703 | 1.86185E+11 | 1.89265E+11 | 3.29826E+15  | 1.83815E+12 | 74442777464 | 2-hydroxyhexa-2,4-dienoate hydratase activity                                                 | Catalysis of the reaction: (2E,4E)-2-hydroxyhexa-2,4-dienoate + H <sub>2</sub> O = 4-hydroxy-2-oxohexanoate.                                                                                                                                                                                                                                                                                                                                            |
| GO:0035410 | 1 | 3  | 60795 | 469   | 46178108 | 49346163336 | 1.01562E+11 | 2.28057E+16  | 2.47796E+16 | 4.60878E+15 | dihydrotestosterone 17-beta-dehydrogenase activity                                            | Catalysis of the reaction: 5alpha-dihydrotestosterone + NAD <sup>+</sup> = 5alpha-androstane-3,17-dione + NADH.                                                                                                                                                                                                                                                                                                                                         |
| GO:0035446 | 2 | 11 | 22861 | 4243  | 46174334 | 4.81169E+11 | 91882432843 | 2.38868E+15  | 12882281431 | 84029921056 | cysteine-glucosaminylinositol ligase activity                                                 | Catalysis of the reaction: 1-(2-amino-2-deoxy-alpha-D-glucopyranoside)-1D-myo-inositol + L-cysteine + ATP = 1-D-myo-inosityl-2-L-cysteinylamido-2-deoxy-alpha-D-glucopyranoside + AMP + diphosphate + 2 H <sup>+</sup> . 1-(2-amino-2-deoxy-alpha-D-glucopyranoside)-1D-myo-inositol is also known as glucosaminyl-inositol or GlcN-Ins, and 1-D-myo-inosityl-2-L-cysteinylamido-2-deoxy-alpha-D-glucopyranoside as desacetylmycothiol or Cys-GlcN-Ins. |
| GO:0035595 | 2 | 6  | 22861 | 3641  | 46174936 | 2.62456E+11 | 7884608484  | 1.73496E+16  | 1.04193E+15 | 2.26905E+16 | N-acetylglucosaminylinositol deacetylase activity                                             | Catalysis of the reaction: 1D-myo-inositol 2-acetamido-2-deoxy-alpha-D-glucopyranoside + H <sub>2</sub> O = 1D-myo-inositol 2-amino-2-deoxy-alpha-D-glucopyranoside + acetate. This reaction is the hydrolysis of an acetyl group from N-acetylglucosaminylinositol.                                                                                                                                                                                    |
| GO:0036243 | 2 | 58 | 22861 | 50815 | 46127762 | 2.53707E+16 | 1.1004E+16  | 1.20513E+15  | 145875509.2 | 241895573.3 | succinate-semialdehyde dehydrogenase (NADP <sup>+</sup> ) activity                            | Catalysis of the reaction: succinate semialdehyde + NADP <sup>+</sup> + H <sub>2</sub> O = succinate + NADPH + 2 H <sup>+</sup> .                                                                                                                                                                                                                                                                                                                       |
| GO:0036243 | 3 | 81 | 26855 | 50815 | 46127762 | 3.0162E+15  | 1.1004E+16  | 1.4547E+16   | 47.80958135 | 318.3963893 | succinate-semialdehyde dehydrogenase (NADP <sup>+</sup> ) activity                            | Catalysis of the reaction: succinate semialdehyde + NADP <sup>+</sup> + H <sub>2</sub> O = succinate + NADPH + 2 H <sup>+</sup> .                                                                                                                                                                                                                                                                                                                       |
| GO:0036355 | 1 | 48 | 60795 | 10876 | 46167701 | 7.89539E+11 | 2.3552E+12  | 1.74516E+16  | 1963.759318 | 81083.62225 | 2-iminoacetate synthase activity                                                              | Catalysis of the reaction: L-tyrosine + S-adenosyl-L-methionine + reduced acceptor = 2-iminoacetate + 4-methylphenol + 5'-deoxyadenosine + L-methionine + acceptor + 2 H <sup>+</sup> .                                                                                                                                                                                                                                                                 |
| GO:0036373 | 3 | 7  | 26855 | 2732  | 46175845 | 2.60659E+12 | 5.91616E+11 | 2.13943E+16  | 1.27737E+16 | 3.90398E+16 | L-fucose mutarotase activity                                                                  | Catalysis of the reaction: alpha-L-fucose = beta-L-fucose.                                                                                                                                                                                                                                                                                                                                                                                              |
| GO:0036380 | 3 | 4  | 26855 | 23435 | 46155142 | 1.48948E+12 | 5.07486E+11 | -1.76856E+16 | 2.36209E+14 | 6.53252E+15 | UDP-N-acetylglucosamine-undecaprenyl-phosphate N-acetylglucosaminephosphotransferase activity | Catalysis of the reaction: UDP-N-acetyl-alpha-D-glucosamine + ditrans,octakis-undecaprenyl phosphate = UMP + N-acetyl-alpha-D-glucosaminyldiphospho-ditrans,octakis-undecaprenol.                                                                                                                                                                                                                                                                       |

|            |   |     |       |       |          |             |             |              |             |             |                                                                  |                                                                                                                                                                                                                                                                                                                                                            |
|------------|---|-----|-------|-------|----------|-------------|-------------|--------------|-------------|-------------|------------------------------------------------------------------|------------------------------------------------------------------------------------------------------------------------------------------------------------------------------------------------------------------------------------------------------------------------------------------------------------------------------------------------------------|
| GO:0036381 | 2 | 32  | 22861 | 25547 | 46153030 | 1.39976E+15 | 5.53222E+11 | 1.33925E+16  | 3546709112  | 2.80543E+11 | pyridoxal 5'-phosphate synthase (glutamine hydrolysing) activity | Catalysis of the reaction: D-ribose 5-phosphate + D-glyceraldehyde 3-phosphate + L-glutamine = pyridoxal 5'-phosphate + L-glutamate + 3 H2O + phosphate. The reaction occurs in two steps: L-glutamine + H2O = L-glutamate + NH3, and subsequently D-ribose 5-phosphate + D-glyceraldehyde 3-phosphate + NH3 = pyridoxal 5'-phosphate + 4 H2O + phosphate. |
| GO:0036381 | 3 | 6   | 26855 | 25547 | 46153030 | 2.23422E+12 | 5.53222E+11 | -1.30809E+15 | 8.32915E+15 | 1.89796E+16 | pyridoxal 5'-phosphate synthase (glutamine hydrolysing) activity | Catalysis of the reaction: D-ribose 5-phosphate + D-glyceraldehyde 3-phosphate + L-glutamine = pyridoxal 5'-phosphate + L-glutamate + 3 H2O + phosphate. The reaction occurs in two steps: L-glutamine + H2O = L-glutamate + NH3, and subsequently D-ribose 5-phosphate + D-glyceraldehyde 3-phosphate + NH3 = pyridoxal 5'-phosphate + 4 H2O + phosphate. |
| GO:0036397 | 1 | 4   | 60795 | 407   | 46178170 | 6579488445  | 8813610692  | 2.90017E+16  | 2.22163E+15 | 6.23865E+16 | formate dehydrogenase (quinone) activity                         | Catalysis of the reaction: formate + a quinone = CO2 + a quinol.                                                                                                                                                                                                                                                                                           |
| GO:0036422 | 1 | 46  | 60795 | 12834 | 46165743 | 7.56641E+11 | 2.77921E+11 | 1.44493E+16  | 37453143.89 | 7093762.896 | heptaprenyl diphosphate synthase activity                        | Catalysis of the reaction: (2E,6E)-farnesyl diphosphate + 4 isopentenyl diphosphate = 4 diphosphate + all-trans-heptaprenyl diphosphate.                                                                                                                                                                                                                   |
| GO:0042242 | 3 | 27  | 26855 | 19981 | 46158596 | 1.0054E+15  | 4.3269E+11  | 1.21636E+16  | 79211270326 | 3.75322E+12 | cobyrinic acid a,c-diamide synthase activity                     | Catalysis of the conversion of cobyrinic acid to cobyrinic acid a,c-diamide via the intermediate formation of cobyrinic acid c-monoamide.                                                                                                                                                                                                                  |
| GO:0042282 | 2 | 7   | 22861 | 5344  | 46173233 | 3.06198E+12 | 1.15725E+12 | 1.40377E+15  | 1.86317E+15 | 3.67561E+15 | hydroxymethylglutaryl-CoA reductase activity                     | Catalysis of the reaction: (R)-mevalonate + CoA + 2 NAD(+) = (S)-3-hydroxy-3-methylglutaryl-CoA + 2 H(+) + 2 NADH.                                                                                                                                                                                                                                         |
| GO:0042282 | 1 | 16  | 60795 | 5344  | 46173233 | 2.6318E+11  | 1.15725E+12 | 1.18535E+15  | 2.50683E+16 | 6.8727E+15  | hydroxymethylglutaryl-CoA reductase activity                     | Catalysis of the reaction: (R)-mevalonate + CoA + 2 NAD(+) = (S)-3-hydroxy-3-methylglutaryl-CoA + 2 H(+) + 2 NADH.                                                                                                                                                                                                                                         |
| GO:0042602 | 1 | 9   | 60795 | 734   | 46177843 | 1.48038E+12 | 15894816334 | 3.21934E+16  | 81876263.5  | 8068427016  | riboflavin reductase (NADPH) activity                            | Catalysis of the reaction: reduced riboflavin + NADP+ = riboflavin + NADPH + 2 H+.                                                                                                                                                                                                                                                                         |
| GO:0043365 | 1 | 130 | 60795 | 46933 | 46131644 | 2.13833E+15 | 1.01634E+16 | 1.07311E+15  | 25.65548574 | 15352.39139 | [formate-C-acetyltransferase]-activating enzyme activity         | Catalysis of the reaction: S-adenosyl-L-methionine + dihydroflavodoxin + [formate C-acetyltransferase]-glycine = 5'-deoxyadenosine + L-methionine + flavodoxin semiquinone + [formate C-acetyltransferase]-glycin-2-yl radical.                                                                                                                            |
| GO:0043365 | 2 | 6   | 22861 | 46933 | 46131644 | 2.62456E+11 | 1.01634E+16 | -1.95323E+16 | 2.32653E+11 | 1.35591E+11 | [formate-C-acetyltransferase]-activating enzyme activity         | Catalysis of the reaction: S-adenosyl-L-methionine + dihydroflavodoxin + [formate C-acetyltransferase]-glycine = 5'-deoxyadenosine + L-methionine + flavodoxin semiquinone + [formate C-acetyltransferase]-glycin-2-yl radical.                                                                                                                            |
| GO:0043714 | 1 | 7   | 60795 | 1870  | 46176707 | 1.15141E+12 | 40494968045 | 1.50759E+16  | 1.30914E+16 | 2.73693E+15 | (R)-citramalate synthase activity                                | Catalysis of the reaction: pyruvate + acetyl-CoA + H2O = (R)-citramalate + CoA.                                                                                                                                                                                                                                                                            |

|                   |   |    |       |       |          |             |             |             |             |             |                                                 |                                                                                                                                                                                                                                                                                                                                                                                                                  |
|-------------------|---|----|-------|-------|----------|-------------|-------------|-------------|-------------|-------------|-------------------------------------------------|------------------------------------------------------------------------------------------------------------------------------------------------------------------------------------------------------------------------------------------------------------------------------------------------------------------------------------------------------------------------------------------------------------------|
| <b>GO:0043748</b> | 2 | 13 | 22861 | 11280 | 46167297 | 5.68654E+11 | 2.44269E+11 | 1.21908E+16 | 5.01254E+15 | 1.23168E+16 | O-succinylbenzoate synthase activity            | Catalysis of the reaction: 2-succinylbenzoate + H2O = 2-succinyl-6-hydroxy-2,4-cyclohexadiene-1-carboxylate.                                                                                                                                                                                                                                                                                                     |
| <b>GO:0043752</b> | 1 | 58 | 60795 | 20740 | 46157837 | 9.54026E+11 | 4.49126E+11 | 1.08691E+16 | 210864277.5 | 25163543410 | adenosylcobinamide kinase activity              | Catalysis of the reaction: RTP + adenosylcobinamide = adenosylcobinamide phosphate + RDP (where RTP is either ATP or GTP).                                                                                                                                                                                                                                                                                       |
| <b>GO:0043752</b> | 3 | 33 | 26855 | 20740 | 46157837 | 1.22882E+16 | 4.49126E+11 | 1.45208E+16 | 48751372.56 | 5070388345  | adenosylcobinamide kinase activity              | Catalysis of the reaction: RTP + adenosylcobinamide = adenosylcobinamide phosphate + RDP (where RTP is either ATP or GTP).                                                                                                                                                                                                                                                                                       |
| <b>GO:0043755</b> | 1 | 56 | 60795 | 14077 | 46164500 | 9.21128E+11 | 3.04838E+12 | 1.59536E+16 | 17651.28831 | 74369.56062 | alpha-ribazole phosphatase activity             | Catalysis of the reaction: alpha-ribazole 5'-phosphate + H(2)O = alpha-ribazole + phosphate.                                                                                                                                                                                                                                                                                                                     |
| <b>GO:0043755</b> | 3 | 18 | 26855 | 14077 | 46164500 | 6.70266E+11 | 3.04838E+12 | 1.13669E+16 | 2.02391E+16 | 5.75929E+15 | alpha-ribazole phosphatase activity             | Catalysis of the reaction: alpha-ribazole 5'-phosphate + H(2)O = alpha-ribazole + phosphate.                                                                                                                                                                                                                                                                                                                     |
| <b>GO:0043757</b> | 3 | 45 | 26855 | 23732 | 46154845 | 1.67567E+16 | 5.13918E+11 | 1.70512E+16 | 229902.137  | 713733.7773 | adenosylcobinamide-phosphate synthase activity  | Catalysis of the reactions: ATP + adenosylcobyric acid + (R)-1-aminopropan-2-yl phosphate = ADP + phosphate + adenosylcobinamide phosphate, and ATP + adenosylcobyric acid + (R)-1-aminopropan-2-ol = ADP + phosphate + adenosylcobinamide.                                                                                                                                                                      |
| <b>GO:0043768</b> | 1 | 19 | 60795 | 3448  | 46175129 | 3.12526E+11 | 74666657658 | 2.06544E+16 | 33362858.82 | 3673473175  | S-ribosylhomocysteine lyase activity            | Catalysis of the reaction: S-(5-deoxy-D-ribose-5-yl)-L-homocysteine = (S)-4,5-dihydroxypentane-2,3-dione + L-homocysteine.                                                                                                                                                                                                                                                                                       |
| <b>GO:0043768</b> | 3 | 6  | 26855 | 3448  | 46175129 | 2.23422E+12 | 74666657658 | 1.58124E+14 | 1.67153E+16 | 3.36506E+16 | S-ribosylhomocysteine lyase activity            | Catalysis of the reaction: S-(5-deoxy-D-ribose-5-yl)-L-homocysteine = (S)-4,5-dihydroxypentane-2,3-dione + L-homocysteine.                                                                                                                                                                                                                                                                                       |
| <b>GO:0043773</b> | 2 | 10 | 22861 | 7997  | 46170580 | 4.37426E+11 | 1.73176E+12 | 1.3368E+16  | 7.58194E+15 | 1.75974E+16 | coenzyme F420-0 gamma-glutamyl ligase activity  | Catalysis of the reactions: (1) GTP + F420-0 + L-glutamate = GDP + phosphate + F420-1, and (2) GTP + F420-1 + L-glutamate = GDP + phosphate + gamma-F420-2. This is the GTP-dependent successive addition of two L-glutamates to the L-lactyl phosphodiester of 7,8-didemethyl-8-hydroxy-5-deazariboflavin (F420-0) to form F420-0-glutamyl-glutamate (F420-2), with a gamma-linkage between the two glutamates. |
| <b>GO:0043774</b> | 1 | 3  | 60795 | 189   | 46178388 | 49346163336 | 4092806931  | 3.59178E+16 | 2.10508E+15 | 5.93706E+15 | coenzyme F420-2 alpha-glutamyl ligase activity  | Catalysis of the reaction: coenzyme F420-2 + L-glutamate + GTP = coenzyme F420-3 + GDP + orthophosphate.                                                                                                                                                                                                                                                                                                         |
| <b>GO:0043778</b> | 1 | 44 | 60795 | 11906 | 46166671 | 7.23744E+11 | 2.57825E+11 | 1.48909E+15 | 3332378.028 | 64156938.52 | cobalt-precorrin-8 methylmutase activity        | Catalysis of the reaction: cobalt-precorrin 8 = cobyrinate.                                                                                                                                                                                                                                                                                                                                                      |
| <b>GO:0043778</b> | 3 | 20 | 26855 | 11906 | 46166671 | 7.4474E+11  | 2.57825E+11 | 1.53034E+16 | 3.79298E+11 | 2.03393E+12 | cobalt-precorrin-8 methylmutase activity        | Catalysis of the reaction: cobalt-precorrin 8 = cobyrinate.                                                                                                                                                                                                                                                                                                                                                      |
| <b>GO:0043781</b> | 1 | 43 | 60795 | 9583  | 46168994 | 7.07295E+11 | 2.0752E+12  | 1.76906E+16 | 158898.1747 | 524872.4508 | cobalt-factor II C20-methyltransferase activity | Catalysis of the reaction: S-adenosyl-L-methionine + cobalt-factor II = S-adenosyl-L-homocysteine + cobalt-factor III.                                                                                                                                                                                                                                                                                           |



|            |   |    |       |       |          |             |             |             |             |             |                                                                           |                                                                                                                                                                |
|------------|---|----|-------|-------|----------|-------------|-------------|-------------|-------------|-------------|---------------------------------------------------------------------------|----------------------------------------------------------------------------------------------------------------------------------------------------------------|
| GO:0043781 | 3 | 20 | 26855 | 9583  | 46168994 | 7.4474E+11  | 2.0752E+12  | 1.84348E+16 | 17406941334 | 1.5557E+11  | cobalt-factor II C20-methyltransferase activity                           | Catalysis of the reaction: S-adenosyl-L-methionine + cobalt-factor II = S-adenosyl-L-homocysteine + cobalt-factor III.                                         |
| GO:0043792 | 3 | 3  | 26855 | 1048  | 46177529 | 1.11711E+12 | 2.26945E+11 | 2.29936E+16 | 2.40178E+15 | 4.48934E+15 | enamidase activity                                                        | Catalysis of the reaction: 1,4,5,6-tetrahydro-6-oxonicotinate + 2 H(2)O = 2-formylglutarate + NH(4)(+).                                                        |
| GO:0043802 | 3 | 27 | 26855 | 19981 | 46158596 | 1.0054E+15  | 4.3269E+11  | 1.21636E+16 | 79211270326 | 3.75322E+12 | hydrogenobyric acid a,c-diamide synthase (glutamine-hydrolysing) activity | Catalysis of the reaction: 2 L-glutamine + 2 ATP + 2 H(2)O + hydrogenobyryrate = 2 L-glutamate + 2 ADP + 4 H(+) + hydrogenobyryrate a,c-diamide + 2 phosphate. |
| GO:0043805 | 3 | 30 | 26855 | 23271 | 46155306 | 1.11711E+16 | 50393497400 | 1.14846E+16 | 75550969707 | 3.63395E+12 | indolepyruvate ferredoxin oxidoreductase activity                         | Catalysis of the reaction: (indol-3-yl)pyruvate + CoA + oxidized ferredoxin = S-2-(indol-3-yl)acetyl-CoA + CO2 + reduced ferredoxin.                           |
| GO:0043817 | 1 | 14 | 60795 | 3503  | 46175074 | 2.30282E+12 | 75857686130 | 1.60203E+16 | 3.16416E+11 | 1.17807E+16 | phosphosulfolactate synthase activity                                     | Catalysis of the reaction: (2R)-O-phospho-3-sulfolactate = phosphoenolpyruvate + sulfite.                                                                      |
| GO:0043818 | 3 | 9  | 26855 | 4938  | 46173639 | 3.35133E+12 | 1.06933E+12 | 1.64803E+16 | 2.85779E+16 | 7.70727E+15 | precorrin-3B synthase activity                                            | Catalysis of the reaction: H(+) + NADH + O(2) + precorrin-3A = H(2)O + NAD(+) + precorrin-3B.                                                                  |
| GO:0043819 | 1 | 10 | 60795 | 3017  | 46175560 | 1.64487E+12 | 65333325451 | 1.33208E+16 | 7.72311E+15 | 1.78949E+16 | precorrin-6A synthase (deacetylating) activity                            | Catalysis of the reaction: S-adenosyl-L-methionine + H(2)O + precorrin-5 = S-adenosyl-L-homocysteine + acetate + 2 H(+) + precorrin-6X.                        |
| GO:0043819 | 2 | 8  | 22861 | 3017  | 46175560 | 3.49941E+16 | 65333325451 | 2.42122E+15 | 1.63633E+12 | 6.79036E+11 | precorrin-6A synthase (deacetylating) activity                            | Catalysis of the reaction: S-adenosyl-L-methionine + H(2)O + precorrin-5 = S-adenosyl-L-homocysteine + acetate + 2 H(+) + precorrin-6X.                        |
| GO:0043822 | 1 | 29 | 60795 | 2539  | 46176038 | 4.77013E+12 | 54982205277 | 3.11699E+16 | 0.006231225 | 0.082995895 | ribonuclease M5 activity                                                  | Catalysis of the endonucleolytic cleavage of RNA, removing 21 and 42 nucleotides, respectively, from the 5'- and 3'-termini of a 5S-rRNA precursor.            |
| GO:0043824 | 1 | 16 | 60795 | 4540  | 46174037 | 2.6318E+11  | 98313986592 | 1.42058E+16 | 48347360276 | 1.67402E+16 | succinylglutamate-semialdehyde dehydrogenase activity                     | Catalysis of the reaction: N-succinyl-L-glutamate 5-semialdehyde + H(2)O + NAD(+) = N-succinyl-L-glutamate + 2 H(+) + NADH.                                    |
| GO:0043825 | 1 | 11 | 60795 | 686   | 46177891 | 1.80936E+12 | 1.48554E+11 | 3.60642E+15 | 33406979.37 | 64156938.52 | succinylornithine transaminase activity                                   | Catalysis of the reaction: 2-oxoglutarate + N(2)-succinyl-L-ornithine = N-succinyl-L-glutamate 5-semialdehyde + L-glutamate.                                   |
| GO:0043834 | 3 | 6  | 26855 | 3292  | 46175285 | 2.23422E+12 | 71288467811 | 1.64803E+16 | 1.36387E+16 | 2.83555E+15 | trimethylamine methyltransferase activity                                 | Catalysis of the reaction: trimethylamine + a trimethylamine corrinoid protein = a methylated trimethylamine corrinoid protein + dimethylamine.                |
| GO:0043834 | 2 | 10 | 22861 | 3292  | 46175285 | 4.37426E+11 | 71288467811 | 2.6173E+15  | 8268971223  | 5.7576E+11  | trimethylamine methyltransferase activity                                 | Catalysis of the reaction: trimethylamine + a trimethylamine corrinoid protein = a methylated trimethylamine corrinoid protein + dimethylamine.                |
| GO:0043864 | 2 | 42 | 22861 | 41262 | 46137315 | 1.83719E+16 | 8.93531E+11 | 1.03991E+16 | 18854389262 | 1.14149E+12 | indoleacetamide hydrolase activity                                        | Catalysis of the reaction: indole-3-acetamide + H2O = indole-3-acetate + NH3. Indole-3-acetamide is known as IAM and indole-3-acetate as IAA.                  |
| GO:0043896 | 1 | 5  | 60795 | 196   | 46178381 | 82243605560 | 4244392373  | 4.27627E+15 | 7346203665  | 5.21177E+11 | glucan 1,6-alpha-glucosidase activity                                     | Catalysis of the hydrolysis of (1->6)-alpha-D-glucosidic linkages in (1->6)-alpha-D-glucans and derived oligosaccharides.                                      |

|            |   |    |       |       |          |             |             |              |             |             |                                                                 |                                                                                                                                                                      |
|------------|---|----|-------|-------|----------|-------------|-------------|--------------|-------------|-------------|-----------------------------------------------------------------|----------------------------------------------------------------------------------------------------------------------------------------------------------------------|
| GO:0043904 | 1 | 16 | 60795 | 4626  | 46173951 | 2.6318E+11  | 1.00176E+12 | 1.39351E+16  | 5.88745E+11 | 1.96677E+15 | isochorismate pyruvate lyase activity                           | Catalysis of the reaction: isochorismate = salicylate + pyruvate.                                                                                                    |
| GO:0043904 | 3 | 10 | 26855 | 4626  | 46173951 | 3.7237E+11  | 1.00176E+12 | 1.8942E+15   | 4.84767E+12 | 1.67638E+16 | isochorismate pyruvate lyase activity                           | Catalysis of the reaction: isochorismate = salicylate + pyruvate.                                                                                                    |
| GO:0043959 | 1 | 19 | 60795 | 6006  | 46172571 | 3.12526E+11 | 1.3006E+12  | 1.26479E+15  | 5.61438E+11 | 1.90483E+16 | L-erythro-3-methylmalyl-CoA lyase activity                      | Catalysis of the reaction: propionyl-CoA + glyoxylate = L-erythro-3-methylmalyl-CoA.                                                                                 |
| GO:0043959 | 3 | 9  | 26855 | 6006  | 46172571 | 3.35133E+12 | 1.3006E+12  | 1.36555E+16  | 9.7255E+15  | 2.1394E+16  | L-erythro-3-methylmalyl-CoA lyase activity                      | Catalysis of the reaction: propionyl-CoA + glyoxylate = L-erythro-3-methylmalyl-CoA.                                                                                 |
| GO:0043959 | 2 | 9  | 22861 | 6006  | 46172571 | 3.93684E+12 | 1.3006E+12  | 1.59786E+16  | 3.57935E+16 | 9.33027E+15 | L-erythro-3-methylmalyl-CoA lyase activity                      | Catalysis of the reaction: propionyl-CoA + glyoxylate = L-erythro-3-methylmalyl-CoA.                                                                                 |
| GO:0044540 | 2 | 1  | 22861 | 11852 | 46166725 | 4.37426E+11 | 2.56656E+12 | -2.55272E+15 | 1.94058E+15 | 3.77776E+15 | L-cystine L-cysteine-lyase (deaminating)                        | Catalysis of the reaction: L-cystine + H2O <=> pyruvate + NH3 + thiocysteine. Thiocysteine is also known as cysteine persulfide.                                     |
| GO:0045127 | 1 | 11 | 60795 | 1358  | 46177219 | 1.80936E+12 | 29407575725 | 2.62122E+16  | 28474088939 | 23394458985 | N-acetylglucosamine kinase activity                             | Catalysis of the reaction: N-acetyl-D-glucosamine + ATP = N-acetyl-D-glucosamine 6-phosphate + ADP + 2 H(+).                                                         |
| GO:0045133 | 2 | 2  | 22861 | 131   | 46178446 | 87485236866 | 28368132695 | 4.9467E+14   | 2.00001E+15 | 5.70307E+15 | 2,3-dihydroxybenzoate 3,4-dioxygenase activity                  | Catalysis of the reaction: 2,3-dihydroxybenzoate + O(2) = 2-hydroxy-3-(3-oxoprop-1-enyl)but-2-enedioate + H(+).                                                      |
| GO:0045148 | 1 | 65 | 60795 | 15316 | 46163261 | 1.06917E+16 | 3.31669E+11 | 1.68867E+15  | 17.60684596 | 1346.271611 | tripeptide aminopeptidase activity                              | Catalysis of the release of the N-terminal residue from a tripeptide.                                                                                                |
| GO:0045148 | 3 | 3  | 26855 | 15316 | 46163261 | 1.11711E+12 | 3.31669E+11 | -1.56997E+16 | 2.26225E+16 | 4.26651E+15 | tripeptide aminopeptidase activity                              | Catalysis of the release of the N-terminal residue from a tripeptide.                                                                                                |
| GO:0045300 | 1 | 17 | 60795 | 4661  | 46173916 | 2.79628E+11 | 1.00934E+12 | 1.47009E+16  | 2.23039E+11 | 8.8043E+11  | acyl-[acyl-carrier-protein] desaturase activity                 | Catalysis of the reaction: stearoyl-[acyl-carrier protein] + reduced acceptor + O2 = oleoyl-[acyl-carrier protein] + acceptor + H2O. The enzyme requires ferredoxin. |
| GO:0045300 | 2 | 7  | 22861 | 4661  | 46173916 | 3.06198E+12 | 1.00934E+12 | 1.60105E+14  | 9.49365E+15 | 2.09968E+16 | acyl-[acyl-carrier-protein] desaturase activity                 | Catalysis of the reaction: stearoyl-[acyl-carrier protein] + reduced acceptor + O2 = oleoyl-[acyl-carrier protein] + acceptor + H2O. The enzyme requires ferredoxin. |
| GO:0045303 | 1 | 15 | 60795 | 3239  | 46175338 | 2.46731E+11 | 70140749465 | 1.81461E+16  | 40090481969 | 2.13316E+12 | diaminobutyrate-2-oxoglutarate transaminase activity            | Catalysis of the reaction: 2-oxoglutarate + L-2,4-diaminobutyrate = L-aspartate 4-semialdehyde + L-glutamate.                                                        |
| GO:0045303 | 3 | 8  | 26855 | 3239  | 46175338 | 2.97896E+11 | 70140749465 | 2.08648E+16  | 7.46753E+11 | 2.43358E+16 | diaminobutyrate-2-oxoglutarate transaminase activity            | Catalysis of the reaction: 2-oxoglutarate + L-2,4-diaminobutyrate = L-aspartate 4-semialdehyde + L-glutamate.                                                        |
| GO:0045484 | 2 | 6  | 22861 | 1381  | 46177196 | 2.62456E+11 | 2.99056E+11 | 3.13358E+16  | 78516684877 | 3.7436E+12  | L-lysine 6-transaminase activity                                | Catalysis of the reaction: 2-oxoglutarate + L-lysine = L-glutamate + allysine.                                                                                       |
| GO:0046025 | 3 | 20 | 26855 | 11159 | 46167418 | 7.4474E+11  | 2.41649E+12 | 1.62383E+16  | 1.55542E+11 | 99110084008 | precorrin-6Y C5,15-methyltransferase (decarboxylating) activity | Catalysis of the reaction: 2 S-adenosyl-L-methionine + precorrin-6Y = 2 S-adenosyl-L-homocysteine + precorrin-8X + CO2.                                              |
| GO:0046026 | 1 | 44 | 60795 | 11564 | 46167013 | 7.23744E+11 | 2.50419E+12 | 1.53113E+15  | 14254786.11 | 29877163.37 | precorrin-4 C11-methyltransferase activity                      | Catalysis of the reaction: S-adenosyl-L-methionine + precorrin-4 = S-adenosyl-L-homocysteine + precorrin 5.                                                          |

|            |   |    |       |       |          |             |             |              |             |             |                                                      |                                                                                                                                                                         |
|------------|---|----|-------|-------|----------|-------------|-------------|--------------|-------------|-------------|------------------------------------------------------|-------------------------------------------------------------------------------------------------------------------------------------------------------------------------|
| GO:0046026 | 3 | 20 | 26855 | 11564 | 46167013 | 7.4474E+11  | 2.50419E+12 | 1.57239E+15  | 25481603911 | 1.44723E+12 | precorrin-4 C11-methyltransferase activity           | Catalysis of the reaction: S-adenosyl-L-methionine + precorrin-4 = S-adenosyl-L-homocysteine + precorrin 5.                                                             |
| GO:0046316 | 2 | 17 | 22861 | 14826 | 46163751 | 7436245134  | 3.21058E+11 | 1.21174E+15  | 1.56323E+16 | 4.61043E+15 | gluconokinase activity                               | Catalysis of the reaction: D-gluconate + ATP = 6-phospho-D-gluconate + ADP + 2 H(+).                                                                                    |
| GO:0046353 | 3 | 7  | 26855 | 1340  | 46177237 | 2.60659E+12 | 2.90178E+11 | 3.16715E+16  | 1.73501E+11 | 1.06289E+12 | aminoglycoside 3-N-acetyltransferase activity        | Catalysis of the reaction: acetyl-CoA + aminoglycoside = CoA + 3-N-acetylaminoglycoside. This is acetylation of the 3-amino group of the central deoxystreptamine ring. |
| GO:0046421 | 3 | 15 | 26855 | 12205 | 46166372 | 5.58555E+11 | 26430004545 | 1.07952E+16  | 6.42278E+16 | 1.52763E+16 | methylisocitrate lyase activity                      | Catalysis of the reaction: (2S,3R)-3-hydroxybutane-1,2,3-tricarboxylate = pyruvate + succinate.                                                                         |
| GO:0046507 | 1 | 6  | 60795 | 1100  | 46177477 | 98692326672 | 23820569439 | 2.05073E+16  | 3.73771E+16 | 9.63961E+15 | UDPSulfoquinovose synthase activity                  | Catalysis of the reaction: sulfite + UDP-D-glucose = H(2)O + UDP-6-sulfoquinovose.                                                                                      |
| GO:0046523 | 2 | 2  | 22861 | 27654 | 46150923 | 87485236866 | 5.98849E+11 | -2.77508E+15 | 1.22185E+12 | 5.3365E+11  | S-methyl-5-thioribose-1-phosphate isomerase activity | Catalysis of the reaction: S-methyl-5-thio-alpha-D-ribose 1-phosphate = S-methyl-5-thio-D-ribulose 1-phosphate.                                                         |
| GO:0046526 | 1 | 7  | 60795 | 621   | 46177956 | 1.15141E+12 | 1.34478E+11 | 3.09796E+15  | 2.31628E+11 | 1.35466E+11 | D-xylulose reductase activity                        | Catalysis of the reaction: NAD(+) + xylitol = D-xylulose + H(+) + NADH.                                                                                                 |
| GO:0046553 | 3 | 25 | 26855 | 7826  | 46170751 | 93092533979 | 1.69473E+12 | 2.45761E+16  | 226133.8022 | 707353.386  | D-malate dehydrogenase (decarboxylating) activity    | Catalysis of the reaction: (R)-malate + NAD(+) = CO(2) + NADH + pyruvate.                                                                                               |
| GO:0046553 | 2 | 11 | 22861 | 7826  | 46170751 | 4.81169E+11 | 1.69473E+12 | 1.50549E+16  | 2.22561E+16 | 6.23865E+16 | D-malate dehydrogenase (decarboxylating) activity    | Catalysis of the reaction: (R)-malate + NAD(+) = CO(2) + NADH + pyruvate.                                                                                               |
| GO:0046556 | 2 | 13 | 22861 | 11012 | 46167565 | 5.68654E+11 | 2.38466E+11 | 1.25377E+16  | 4.12836E+14 | 1.05028E+16 | alpha-L-arabinofuranosidase activity                 | Catalysis of the hydrolysis of terminal non-reducing alpha-L-arabinofuranoside residues in alpha-L-arabinosides.                                                        |
| GO:0046556 | 1 | 30 | 60795 | 11012 | 46167565 | 4.93462E+11 | 2.38466E+11 | 1.04916E+16  | 2.38859E+11 | 9.31303E+11 | alpha-L-arabinofuranosidase activity                 | Catalysis of the hydrolysis of terminal non-reducing alpha-L-arabinofuranoside residues in alpha-L-arabinosides.                                                        |
| GO:0046558 | 1 | 15 | 60795 | 3075  | 46175502 | 2.46731E+11 | 66589319112 | 1.88958E+15  | 2.23915E+11 | 1.31949E+12 | arabinan endo-1,5-alpha-L-arabinosidase activity     | Catalysis of the endohydrolysis of (1->5)-alpha-arabinofuranosidic linkages in (1->5) arabinans.                                                                        |
| GO:0046559 | 1 | 12 | 60795 | 2470  | 46176107 | 1.97385E+12 | 53488005921 | 1.88372E+16  | 1.47353E+12 | 6.22107E+11 | alpha-glucuronidase activity                         | Catalysis of the reaction: an alpha-D-glucuronoside + H2O = an alcohol + D-glucuronate.                                                                                 |
| GO:0046565 | 1 | 4  | 60795 | 178   | 46178399 | 6579488445  | 3854601236  | 4.09332E+15  | 1.01177E+11 | 4.60594E+11 | 3-dehydroshikimate dehydratase activity              | Catalysis of the reaction: 3-dehydroshikimate = 3,4-dihydroxybenzoate + H2O. 3,4-dihydroxybenzoate is also known as protocatechuate.                                    |
| GO:0046589 | 3 | 13 | 26855 | 2866  | 46175711 | 4.84081E+11 | 62063410919 | 2.96343E+16  | 25742610.42 | 401099013   | ribonuclease T1 activity                             | Catalysis of the endonucleolytic cleavage to nucleoside 3'-phosphates and 3'-phosphooligonucleotides ending in Gp with 2',3'-cyclic phosphate intermediates.            |
| GO:0046589 | 2 | 5  | 22861 | 2866  | 46175711 | 2.18713E+12 | 62063410919 | 1.81722E+15  | 1.49803E+16 | 3.05601E+15 | ribonuclease T1 activity                             | Catalysis of the endonucleolytic cleavage to nucleoside 3'-phosphates and 3'-phosphooligonucleotides ending in Gp with 2',3'-cyclic phosphate intermediates.            |
| GO:0046990 | 1 | 11 | 60795 | 4026  | 46174551 | 1.80936E+12 | 8718328414  | 1.05336E+16  | 1.99277E+16 | 3.86304E+15 | N-hydroxyarylamine O-acetyltransferase activity      | Catalysis of the reaction: acetyl-CoA + an N-hydroxyarylamine = CoA + an N-acetoxyarylamine.                                                                            |

|            |   |    |       |       |          |             |             |              |             |             |                                                                       |                                                                                                                                                |
|------------|---|----|-------|-------|----------|-------------|-------------|--------------|-------------|-------------|-----------------------------------------------------------------------|------------------------------------------------------------------------------------------------------------------------------------------------|
| GO:0047004 | 1 | 5  | 60795 | 13025 | 46165552 | 82243605560 | 2.82057E+11 | -1.77801E+16 | 6.0158E+11  | 2.00316E+16 | UDP-N-acetylglucosamine 6-dehydrogenase activity                      | Catalysis of the reaction: H(2)O + 2 NAD(+) + UDP-N-acetyl-alpha-D-glucosamine = 3 H(+) + 2 NADH + UDP-N-acetyl-2-amino-2-deoxy-D-glucuronate. |
| GO:0047040 | 1 | 2  | 60795 | 11922 | 46166655 | 3289744222  | 2.58172E+11 | -2.97228E+15 | 21140206167 | 1.25414E+11 | pteridine reductase activity                                          | Catalysis of the reaction: 5,6,7,8-tetrahydrobiopterin + 2 NADP(+) = biopterin + 2 H(+) + 2 NADPH.                                             |
| GO:0047044 | 2 | 6  | 22861 | 2593  | 46175984 | 2.62456E+11 | 5.61516E+11 | 2.22468E+16  | 2.08793E+15 | 5.90167E+15 | androstan-3-alpha,17-beta-diol dehydrogenase activity                 | Catalysis of the reaction: NAD+ + androstan-3-alpha,17-beta-diol = 17-beta-hydroxyandrostan-3-one + NADH + H+.                                 |
| GO:0047067 | 3 | 10 | 26855 | 948   | 46177629 | 3.7237E+11  | 2.0529E+11  | 4.181E+15    | 414824.0553 | 102563384.7 | hydrogen:quinone oxidoreductase activity                              | Catalysis of the reaction: H(2) + menaquinone = reduced menaquinone.                                                                           |
| GO:0047067 | 1 | 8  | 60795 | 948   | 46177629 | 1.3159E+11  | 2.0529E+11  | 2.68031E+14  | 47515658962 | 24649038973 | hydrogen:quinone oxidoreductase activity                              | Catalysis of the reaction: H(2) + menaquinone = reduced menaquinone.                                                                           |
| GO:0047075 | 3 | 6  | 26855 | 463   | 46178114 | 2.23422E+12 | 1.00263E+11 | 4.47791E+15  | 407938742.2 | 4372110722  | 2,5-dihydroxypyridine 5,6-dioxygenase activity                        | Catalysis of the reaction: H2O + O2 + 2,5-dihydroxypyridine = formate + maleamate.                                                             |
| GO:0047075 | 2 | 2  | 22861 | 463   | 46178114 | 87485236866 | 1.00263E+11 | 3.12525E+16  | 2.25442E+16 | 4.25629E+15 | 2,5-dihydroxypyridine 5,6-dioxygenase activity                        | Catalysis of the reaction: H2O + O2 + 2,5-dihydroxypyridine = formate + maleamate.                                                             |
| GO:0047091 | 1 | 6  | 60795 | 1050  | 46177527 | 98692326672 | 22737816282 | 2.11784E+16  | 2.98489E+16 | 7.98439E+15 | L-lysine 6-monooxygenase (NADPH) activity                             | Catalysis of the reaction: L-lysine + NADPH + O(2) = N(6)-hydroxy-L-lysine + H(2)O + NADP(+).                                                  |
| GO:0047099 | 3 | 19 | 26855 | 7246  | 46171331 | 7.07503E+11 | 1.56913E+12 | 2.17278E+14  | 1114984292  | 14708530807 | CDP-4-dehydro-6-deoxyglucose reductase activity                       | Catalysis of the reaction: H2O + NAD(P)+ + CDP-4-dehydro-3,6-dideoxy-D-glucose = NAD(P)H + CDP-4-dehydro-6-deoxy-D-glucose.                    |
| GO:0047102 | 3 | 5  | 26855 | 2527  | 46176050 | 1.86185E+11 | 54722344519 | 1.76654E+16  | 1.71438E+15 | 3.43291E+15 | aminomuconate-semialdehyde dehydrogenase activity                     | Catalysis of the reaction: H2O + NAD+ + 2-aminomuconate semialdehyde = NADH + 2-aminomuconate.                                                 |
| GO:0047107 | 1 | 4  | 60795 | 725   | 46177852 | 6579488445  | 1.56999E+11 | 2.06722E+16  | 1.6247E+16  | 3.28199E+15 | gamma-guanidinobutyraldehyde dehydrogenase activity                   | Catalysis of the reaction: 4-guanidinobutanal + H(2)O + NAD(+) = 4-guanidinobutanoate + 2 H(+) + NADH.                                         |
| GO:0047107 | 3 | 8  | 26855 | 725   | 46177852 | 2.97896E+11 | 1.56999E+11 | 4.24598E+15  | 16443549.79 | 270499669.6 | gamma-guanidinobutyraldehyde dehydrogenase activity                   | Catalysis of the reaction: 4-guanidinobutanal + H(2)O + NAD(+) = 4-guanidinobutanoate + 2 H(+) + NADH.                                         |
| GO:0047116 | 1 | 5  | 60795 | 666   | 46177911 | 82243605560 | 14422272042 | 2.51161E+16  | 2.07517E+15 | 5.87278E+15 | 1,6-dihydroxycyclohexa-2,4-diene-1-carboxylate dehydrogenase activity | Catalysis of the reaction: NAD+ + 1,6-dihydroxycyclohexa-2,4-diene-1-carboxylate = NADH + CO2 + catechol.                                      |
| GO:0047116 | 3 | 3  | 26855 | 666   | 46177911 | 1.11711E+12 | 14422272042 | 2.9534E+15   | 7.23857E+15 | 1.69529E+16 | 1,6-dihydroxycyclohexa-2,4-diene-1-carboxylate dehydrogenase activity | Catalysis of the reaction: NAD+ + 1,6-dihydroxycyclohexa-2,4-diene-1-carboxylate = NADH + CO2 + catechol.                                      |
| GO:0047121 | 3 | 64 | 26855 | 41481 | 46137096 | 2.38317E+16 | 8.98274E+11 | 1.40765E+16  | 11859.52654 | 404694.0917 | isoquinoline 1-oxidoreductase activity                                | Catalysis of the reaction: A + H(2)O + isoquinoline = AH(2) + isoquinolin-1(2H)-one.                                                           |
| GO:0047126 | 1 | 1  | 60795 | 20    | 46178557 | 16448721112 | 433101262.5 | 5.24713E+15  | 2.60037E+16 | 4.79755E+14 | N5-(carboxyethyl)ornithine synthase activity                          | Catalysis of the reaction: N(5)-[1(S)-1-carboxyethyl]-L-ornithine + H(2)O + NADP(+) = L-ornithine + H(+) + NADPH + pyruvate.                   |
| GO:0047129 | 2 | 5  | 22861 | 1137  | 46177440 | 2.18713E+12 | 2.46218E+11 | 3.15103E+16  | 2.93399E+11 | 1.10837E+16 | opine dehydrogenase activity                                          | Catalysis of the reaction: (2S)-2-[(R)-1-carboxyethylamino]pentanoate + H(2)O + NAD(+) = L-2-                                                  |

|            |   |    |       |       |          |             |             |              |             |             |                                                                                           |                                                                                                                                                                                                            |                                           |
|------------|---|----|-------|-------|----------|-------------|-------------|--------------|-------------|-------------|-------------------------------------------------------------------------------------------|------------------------------------------------------------------------------------------------------------------------------------------------------------------------------------------------------------|-------------------------------------------|
|            |   |    |       |       |          |             |             |              |             |             |                                                                                           |                                                                                                                                                                                                            | aminopentanoate + H(+) + NADH + pyruvate. |
| GO:0047134 | 3 | 59 | 26855 | 49029 | 46129548 | 2.19698E+16 | 1.06173E+16 | 1.04911E+16  | 3849136454  | 4171413233  | protein-disulfide reductase activity                                                      | Catalysis of the reaction: protein-dithiol + NAD(P)+ = protein-disulfide + NAD(P)H + H+.                                                                                                                   |                                           |
| GO:0047138 | 1 | 9  | 60795 | 734   | 46177843 | 1.48038E+12 | 15894816334 | 3.21934E+16  | 81876263.5  | 8068427016  | aquacobalamin reductase activity                                                          | Catalysis of the reaction: 2 cob(II)alamin + NAD+ = 2 aquacob(III)alamin + NADH + H+.                                                                                                                      |                                           |
| GO:0047154 | 2 | 4  | 22861 | 751   | 46177826 | 1.7497E+12  | 16262952408 | 3.42745E+15  | 5.88435E+11 | 1.96677E+15 | methylmalonyl-CoA carboxytransferase activity                                             | Catalysis of the reaction: pyruvate + D-methylmalonyl-CoA = oxaloacetic acid + propionyl-CoA.                                                                                                              |                                           |
| GO:0047206 | 1 | 6  | 60795 | 108   | 46178469 | 98692326672 | 23387468176 | 5.39913E+15  | 887863.6616 | 1566661991  | UDP-N-acetylmuramoylpentapeptide-lysine N6-alanyltransferase activity                     | Catalysis of the reaction: UDP-N-acetylmuramoyl-L-alanyl-D-glutamyl-L-lysyl-D-alanyl-D-alanine + L-alanyl-tRNA = UDP-N-acetylmuramoyl-L-alanyl-D-glutamyl-N6-(L-alanyl)-L-lysyl-D-alanyl-D-alanine + tRNA. |                                           |
| GO:0047241 | 1 | 5  | 60795 | 494   | 46178083 | 82243605560 | 1.06976E+11 | 2.94262E+16  | 5.57764E+11 | 1.89704E+16 | lipopolysaccharide N-acetylmannosaminouronosyltransferase activity                        | Catalysis of the reaction: lipopolysaccharide + UDP-N-acetylmannosaminouronate = N-acetyl-beta-D-mannosaminouronosyl-1,4-lipopolysaccharide + UDP.                                                         |                                           |
| GO:0047244 | 3 | 2  | 26855 | 14260 | 46164317 | 74474027183 | 3.08801E+11 | -2.05187E+15 | 1.09086E+16 | 2.35696E+15 | N-acetylglucosaminyldiphosphoundecaprenol N-acetyl-beta-D-mannosaminytransferase activity | Catalysis of the reaction: N-acetyl-D-glucosaminyldiphosphoundecaprenol + UDP-N-acetyl-D-mannosamine = N-acetyl-beta-D-mannosaminyl-1,4-N-acetyl-D-glucosaminyldiphosphoundecaprenol + UDP.                |                                           |
| GO:0047257 | 1 | 4  | 60795 | 187   | 46178390 | 6579488445  | 4049496805  | 4.02216E+15  | 1.22291E+12 | 5.3365E+11  | diglucosyl diacylglycerol synthase activity                                               | Catalysis of the reaction: 1,2-diacyl-3-O-(alpha-D-glucopyranosyl)-sn-glycerol + UDP-D-glucose = UDP + 1,2-diacyl-3-O-(alpha-D-glucopyranosyl(1,2)-O-alpha-D-glucopyranosyl)-sn-glycerol.                  |                                           |
| GO:0047280 | 1 | 11 | 60795 | 1632  | 46176945 | 1.80936E+12 | 35341063021 | 2.35606E+15  | 1.56244E+11 | 99403931670 | nicotinamide phosphoribosyltransferase activity                                           | Catalysis of the reaction: diphosphate + nicotinamide mononucleotide = 5-phospho-alpha-D-ribose 1-diphosphate + H(+) + nicotinamide.                                                                       |                                           |
| GO:0047280 | 2 | 4  | 22861 | 1632  | 46176945 | 1.7497E+12  | 35341063021 | 2.30769E+16  | 9.36455E+15 | 2.07883E+16 | nicotinamide phosphoribosyltransferase activity                                           | Catalysis of the reaction: diphosphate + nicotinamide mononucleotide = 5-phospho-alpha-D-ribose 1-diphosphate + H(+) + nicotinamide.                                                                       |                                           |
| GO:0047298 | 3 | 18 | 26855 | 8232  | 46170345 | 6.70266E+11 | 1.78264E+12 | 1.91072E+15  | 29803254189 | 2.41289E+11 | (S)-3-amino-2-methylpropionate transaminase activity                                      | Catalysis of the reaction: (S)-3-amino-2-methylpropanoate + 2-oxoglutarate = 2-methyl-3-oxopropanoate + L-glutamate.                                                                                       |                                           |
| GO:0047330 | 2 | 13 | 22861 | 5559  | 46173018 | 5.68654E+11 | 1.2038E+12  | 2.23995E+16  | 6527067850  | 47281163424 | polyphosphate-glucose phosphotransferase activity                                         | Catalysis of the reaction: beta-D-glucose + long chain polyphosphate = glucose-6-phosphate + long chain polyphosphate.                                                                                     |                                           |
| GO:0047343 | 3 | 13 | 26855 | 9618  | 46168959 | 4.84081E+11 | 2.08278E+12 | 1.21674E+14  | 5.07703E+14 | 1.24384E+16 | glucose-1-phosphate cytidylyltransferase activity                                         | Catalysis of the reaction: alpha-D-glucose 1-phosphate + CTP = CDP-D-glucose + diphosphate.                                                                                                                |                                           |
| GO:0047343 | 1 | 3  | 60795 | 9618  | 46168959 | 49346163336 | 2.08278E+12 | -2.0775E+15  | 1.36148E+16 | 4.11818E+15 | glucose-1-phosphate cytidylyltransferase activity                                         | Catalysis of the reaction: alpha-D-glucose 1-phosphate + CTP = CDP-D-glucose + diphosphate.                                                                                                                |                                           |

|            |   |    |       |       |          |             |             |              |             |             |                                                              |                                                                                                                                           |
|------------|---|----|-------|-------|----------|-------------|-------------|--------------|-------------|-------------|--------------------------------------------------------------|-------------------------------------------------------------------------------------------------------------------------------------------|
| GO:0047348 | 1 | 9  | 60795 | 1902  | 46176675 | 1.48038E+12 | 4.11879E+11 | 1.84568E+16  | 1.14114E+16 | 3.55336E+15 | glycerol-3-phosphate cytidylyltransferase activity           | Catalysis of the reaction: sn-glycerol 3-phosphate + CTP = CDP-glycerol + diphosphate.                                                    |
| GO:0047348 | 2 | 7  | 22861 | 1902  | 46176675 | 3.06198E+12 | 4.11879E+11 | 2.89417E+16  | 56936345870 | 2.88097E+11 | glycerol-3-phosphate cytidylyltransferase activity           | Catalysis of the reaction: sn-glycerol 3-phosphate + CTP = CDP-glycerol + diphosphate.                                                    |
| GO:0047356 | 1 | 3  | 60795 | 262   | 46178315 | 49346163336 | 56736265390 | 3.12059E+16  | 5.24655E+14 | 1.27956E+15 | CDP-ribitol ribitolphosphotransferase activity               | Catalysis of the reaction: ribitol phosphate(n) + CDP-ribitol = ribitol phosphate(n+1) + CMP.                                             |
| GO:0047360 | 3 | 6  | 26855 | 1496  | 46177081 | 2.23422E+12 | 3.2396E+11  | 2.78589E+16  | 2.85236E+11 | 1.08348E+16 | undecaprenyl-phosphate galactose phosphotransferase activity | Catalysis of the reaction: all-trans-undecaprenyl phosphate + UDP-D-galactose = alpha-D-galactosyl-diphosphoundecaprenol + UMP.           |
| GO:0047371 | 3 | 6  | 26855 | 2284  | 46176293 | 2.23422E+12 | 4.94602E+11 | 2.17543E+16  | 2.46802E+16 | 6.78912E+14 | butyrate-acetoacetate CoA-transferase activity               | Catalysis of the reaction: acetoacetate + butanoyl-CoA = acetoacetyl-CoA + butanoate.                                                     |
| GO:0047407 | 3 | 9  | 26855 | 1975  | 46176602 | 3.35133E+12 | 4.27687E+11 | 2.97011E+15  | 3378145868  | 26875461055 | ADP-ribosyl-[dinitrogen reductase] hydrolase activity        | Catalysis of the reaction: ADP-ribosyl-[dinitrogen reductase] = adenosine diphosphate ribose + [dinitrogen reductase].                    |
| GO:0047417 | 2 | 4  | 22861 | 549   | 46178028 | 1.7497E+12  | 1.18886E+11 | 3.87946E+16  | 1.81347E+11 | 7.37717E+11 | N-carbamoyl-D-amino acid hydrolase activity                  | Catalysis of the reaction: H2O + N-carbamoyl-D-amino acid = CO2 + NH3 + D-amino acid.                                                     |
| GO:0047419 | 1 | 85 | 60795 | 23979 | 46154598 | 1.39814E+16 | 5.19267E+11 | 1.42896E+15  | 27.428193   | 197.0149666 | N-acetylgalactosamine-6-phosphate deacetylase activity       | Catalysis of the reaction: H2O + N-acetyl-D-galactosamine 6-phosphate = acetate + D-galactosamine 6-phosphate.                            |
| GO:0047420 | 3 | 1  | 26855 | 11366 | 46167211 | 37237013592 | 2.46131E+12 | -2.72462E+16 | 1.023E+16   | 2.23372E+16 | N-acyl-D-amino-acid deacylase activity                       | Catalysis of the reaction: H2O + N-acyl-D-amino acid = D-amino acid + an acid.                                                            |
| GO:0047436 | 2 | 2  | 22861 | 63    | 46178514 | 87485236866 | 13642689769 | 6.00284E+16  | 4.69094E+12 | 1.6345E+14  | arylmalonate decarboxylase activity                          | Catalysis of the reaction: 2-aryl-2-methylmalonate + H(+) = 2-arylpropionate + CO(2).                                                     |
| GO:0047437 | 3 | 5  | 26855 | 1273  | 46177304 | 1.86185E+11 | 27566895359 | 2.75573E+16  | 99966563470 | 3.16293E+16 | 4-oxalocrotonate decarboxylase activity                      | Catalysis of the reaction: 4-oxalocrotonate = CO2 + 2-oxopent-4-enoate.                                                                   |
| GO:0047437 | 2 | 3  | 22861 | 1273  | 46177304 | 1.31228E+11 | 27566895359 | 2.25107E+15  | 2.61665E+15 | 4.81898E+15 | 4-oxalocrotonate decarboxylase activity                      | Catalysis of the reaction: 4-oxalocrotonate = CO2 + 2-oxopent-4-enoate.                                                                   |
| GO:0047443 | 3 | 11 | 26855 | 2755  | 46175822 | 4.09607E+12 | 59659698912 | 2.77941E+15  | 1021655006  | 981026400.2 | 4-hydroxy-4-methyl-2-oxoglutarate aldolase activity          | Catalysis of the reaction: 4-hydroxy-4-methyl-2-oxoglutarate = 2 pyruvate.                                                                |
| GO:0047448 | 3 | 12 | 26855 | 2784  | 46175793 | 4.46844E+12 | 60287695743 | 2.88984E+12  | 1500465011  | 18831063928 | 5-dehydro-4-deoxyglucarate dehydratase activity              | Catalysis of the reaction: 5-dehydro-4-deoxy-D-glucarate + H(+) = 2,5-dioxopentanoate + CO(2) + H(2)O.                                    |
| GO:0047449 | 3 | 6  | 26855 | 329   | 46178248 | 2.23422E+12 | 7124515768  | 4.97084E+15  | 553845399.9 | 788561260.8 | 2-dehydro-3-deoxy-L-arabinonate dehydratase activity         | Catalysis of the reaction: 2-dehydro-3-deoxy-L-arabinonate = 2,5-dioxopentanoate + H(2)O.                                                 |
| GO:0047449 | 2 | 2  | 22861 | 329   | 46178248 | 87485236866 | 7124515768  | 3.61818E+16  | 1.18788E+14 | 2.52303E+15 | 2-dehydro-3-deoxy-L-arabinonate dehydratase activity         | Catalysis of the reaction: 2-dehydro-3-deoxy-L-arabinonate = 2,5-dioxopentanoate + H(2)O.                                                 |
| GO:0047456 | 3 | 22 | 26855 | 8805  | 46169772 | 8.19214E+11 | 1.90673E+11 | 2.10314E+16  | 26875567.93 | 417177518.8 | 2-methylisocitrate dehydratase activity                      | Catalysis of the reaction: (2S,3R)-3-hydroxybutane-1,2,3-tricarboxylate = cis-2-methylaconitate + H(2)O.                                  |
| GO:0047465 | 1 | 12 | 60795 | 2391  | 46176186 | 1.97385E+12 | 51777255934 | 1.93062E+16  | 1.09495E+12 | 4.87183E+12 | N-acylglucosamine-6-phosphate 2-epimerase activity           | Catalysis of the reaction: N-acyl-D-glucosamine 6-phosphate = N-acyl-D-mannosamine 6-phosphate.                                           |
| GO:0047470 | 2 | 11 | 22861 | 8915  | 46169662 | 4.81169E+11 | 1.93055E+12 | 1.31753E+13  | 5.79488E+15 | 1.39761E+14 | (1,4)-alpha-D-glucan 1-alpha-D-glucosylmutase activity       | Catalysis of the reaction: 4-[(1->4)-alpha-D-glucosyl](n-1)-D-glucose = 1-alpha-D-[(1->4)-alpha-D-glucosyl](n-1)-alpha-D-glucopyranoside. |

|            |   |    |       |       |          |             |             |             |             |             |                                                                    |                                                                                                                                                                                                                                                                                                                                  |
|------------|---|----|-------|-------|----------|-------------|-------------|-------------|-------------|-------------|--------------------------------------------------------------------|----------------------------------------------------------------------------------------------------------------------------------------------------------------------------------------------------------------------------------------------------------------------------------------------------------------------------------|
| GO:0047471 | 2 | 12 | 22861 | 11415 | 46167162 | 5.24911E+11 | 2.47193E+11 | 1.08644E+15 | 1.32781E+16 | 2.77034E+16 | maltose alpha-D-glucosyltransferase activity                       | Catalysis of the reaction: maltose = trehalose.                                                                                                                                                                                                                                                                                  |
| GO:0047472 | 1 | 15 | 60795 | 3883  | 46174694 | 2.46731E+11 | 84086610118 | 1.55299E+16 | 2.81181E+12 | 1.07103E+16 | 3-carboxy-cis,cis-muconate cycloisomerase activity                 | Catalysis of the reaction: 2-(carboxymethyl)-5-oxo-2,5-dihydro-2-furoate = 3-carboxy-cis,cis-muconate + H(+).                                                                                                                                                                                                                    |
| GO:0047472 | 3 | 11 | 26855 | 3883  | 46174694 | 4.09607E+12 | 84086610118 | 2.28429E+16 | 2.47648E+11 | 1.41537E+12 | 3-carboxy-cis,cis-muconate cycloisomerase activity                 | Catalysis of the reaction: 2-(carboxymethyl)-5-oxo-2,5-dihydro-2-furoate = 3-carboxy-cis,cis-muconate + H(+).                                                                                                                                                                                                                    |
| GO:0047472 | 2 | 6  | 22861 | 3883  | 46174694 | 2.62456E+11 | 84086610118 | 1.64213E+16 | 1.38916E+14 | 2.87856E+15 | 3-carboxy-cis,cis-muconate cycloisomerase activity                 | Catalysis of the reaction: 2-(carboxymethyl)-5-oxo-2,5-dihydro-2-furoate = 3-carboxy-cis,cis-muconate + H(+).                                                                                                                                                                                                                    |
| GO:0047482 | 1 | 4  | 60795 | 232   | 46178345 | 6579488445  | 5023974645  | 3.71107E+15 | 2.78171E+11 | 1.06152E+15 | UDP-N-acetylmuramoyl-L-alanyl-D-glutamate-L-lysine ligase activity | Catalysis of the reaction: L-lysine + ATP + UDP-N-acetylmuramoyl-L-alanyl-D-glutamate = ADP + 2 H(+) + phosphate + UDP-N-acetylmuramoyl-L-alanyl-D-glutamyl-L-lysine.                                                                                                                                                            |
| GO:0047490 | 1 | 2  | 60795 | 142   | 46178435 | 3289744222  | 3075018964  | 3.41931E+15 | 1.53585E+16 | 3.12237E+15 | pectin lyase activity                                              | Catalysis of the reaction: a pectin = an oligosaccharide with 4-deoxy-6-O-methyl-alpha-D-galact-4-enuronate end + a pectin. This reaction is the eliminative cleavage of (1->4)-alpha-D-galacturonan methyl ester to give oligosaccharides with 4-deoxy-6-O-methyl-alpha-D-galact-4-enuronosyl groups at their nonreducing ends. |
| GO:0047512 | 1 | 20 | 60795 | 2500  | 46176077 | 3.28974E+12 | 5.41377E+11 | 2.60327E+16 | 3811773.868 | 9653525.013 | (S,S)-butanediol dehydrogenase activity                            | Catalysis of the reaction: (S,S)-butane-2,3-diol + NAD(+) = acetoin + H(+) + NADH.                                                                                                                                                                                                                                               |
| GO:0047519 | 1 | 9  | 60795 | 563   | 46178014 | 1.48038E+12 | 12191800540 | 3.60199E+15 | 9062767.901 | 12349890648 | quinate dehydrogenase (quinone) activity                           | Catalysis of the reaction: (-)-quinate + pyrroloquinoline-quinone = (-)-3-dehydroquinate + pyrroloquinoline-quinol.                                                                                                                                                                                                              |
| GO:0047554 | 3 | 8  | 26855 | 828   | 46177749 | 2.97896E+11 | 1.79304E+11 | 4.05433E+15 | 45355489.49 | 666156696.6 | 2-pyrone-4,6-dicarboxylate lactonase activity                      | Catalysis of the reaction: 2-oxo-2H-pyran-4,6-dicarboxylate + H(2)O = 4-carboxy-2-hydroxyhexa-2,4-dienedioate + H(+).                                                                                                                                                                                                            |
| GO:0047569 | 1 | 39 | 60795 | 6997  | 46171580 | 6.415E+11   | 1.5152E+11  | 2.08194E+15 | 240.8616402 | 118394.9658 | 3-oxoadipate CoA-transferase activity                              | Catalysis of the reaction: succinyl-CoA + 3-oxoadipate = succinate + 3-oxoadipyl-CoA.                                                                                                                                                                                                                                            |
| GO:0047569 | 2 | 10 | 22861 | 6997  | 46171580 | 4.37426E+11 | 1.5152E+11  | 1.52953E+15 | 3.07379E+15 | 8.18817E+15 | 3-oxoadipate CoA-transferase activity                              | Catalysis of the reaction: succinyl-CoA + 3-oxoadipate = succinate + 3-oxoadipyl-CoA.                                                                                                                                                                                                                                            |
| GO:0047570 | 3 | 18 | 26855 | 12191 | 46166386 | 6.70266E+11 | 2.63997E+11 | 1.34421E+15 | 4.1596E+12  | 1.47933E+16 | 3-oxoadipate enol-lactonase activity                               | Catalysis of the reaction: 3-oxoadipate enol-lactone + H2O = 3-oxoadipate.                                                                                                                                                                                                                                                       |
| GO:0047570 | 2 | 13 | 22861 | 12191 | 46166386 | 5.68654E+11 | 2.63997E+11 | 1.10703E+16 | 9.20502E+15 | 2.04892E+16 | 3-oxoadipate enol-lactonase activity                               | Catalysis of the reaction: 3-oxoadipate enol-lactone + H2O = 3-oxoadipate.                                                                                                                                                                                                                                                       |
| GO:0047575 | 2 | 26 | 22861 | 23099 | 46155478 | 1.13731E+16 | 5.0021E+11  | 1.18502E+15 | 1.48072E+12 | 6.24506E+11 | 4-carboxymuconolactone decarboxylase activity                      | Catalysis of the reaction: (R)-2-(carboxymethyl)-5-oxo-2,5-dihydro-2-furoate + H(+) = 5-oxo-4,5-dihydro-2-furylacetate + CO(2).                                                                                                                                                                                                  |
| GO:0047575 | 3 | 34 | 26855 | 23099 | 46155478 | 1.26606E+16 | 5.0021E+11  | 1.33974E+16 | 1789251863  | 1.59564E+11 | 4-carboxymuconolactone decarboxylase activity                      | Catalysis of the reaction: (R)-2-(carboxymethyl)-5-oxo-2,5-dihydro-2-furoate + H(+) = 5-oxo-4,5-dihydro-2-furylacetate + CO(2).                                                                                                                                                                                                  |

|            |   |    |       |      |          |             |             |              |             |             |                                          |                                                                                                                           |
|------------|---|----|-------|------|----------|-------------|-------------|--------------|-------------|-------------|------------------------------------------|---------------------------------------------------------------------------------------------------------------------------|
| GO:0047577 | 1 | 4  | 60795 | 611  | 46177966 | 6579488445  | 1.32312E+11 | 2.31403E+16  | 9.1927E+15  | 2.04729E+16 | 4-hydroxybutyrate dehydrogenase activity | Catalysis of the reaction: 4-hydroxybutanoate + NAD(+) = H(+) + NADH + succinate semialdehyde.                            |
| GO:0047584 | 3 | 10 | 26855 | 2425 | 46176152 | 3.7237E+11  | 52513528080 | 2.82598E+16  | 23609868327 | 1.98544E+11 | 4-oxalmesaconate hydratase activity      | Catalysis of the reaction: 2-hydroxy-4-oxobutane-1,2,4-tricarboxylate = (1E)-4-oxobut-1-ene-1,2,4-tricarboxylate + H(2)O. |
| GO:0047589 | 1 | 2  | 60795 | 173  | 46178404 | 3289744222  | 37463259208 | 3.13443E+16  | 2.22229E+16 | 4.21296E+15 | 5-aminovalerate transaminase activity    | Catalysis of the reaction: 2-oxoglutarate + 5-aminopentanoate = 5-oxopentanoate + L-glutamate.                            |
| GO:0047590 | 1 | 17 | 60795 | 4334 | 46174243 | 2.79628E+11 | 9385304359  | 1.57503E+16  | 96152602505 | 4.43096E+11 | 5-dehydro-2-deoxygluconokinase activity  | Catalysis of the reaction: ATP + 5-dehydro-2-deoxy-D-gluconate = ADP + 6-phospho-5-dehydro-2-deoxy-D-gluconate.           |
| GO:0047590 | 3 | 8  | 26855 | 4334 | 46174243 | 2.97896E+11 | 9385304359  | 1.66633E+16  | 4.4379E+15  | 1.12174E+16 | 5-dehydro-2-deoxygluconokinase activity  | Catalysis of the reaction: ATP + 5-dehydro-2-deoxy-D-gluconate = ADP + 6-phospho-5-dehydro-2-deoxy-D-gluconate.           |
| GO:0047602 | 3 | 7  | 26855 | 1693 | 46176884 | 2.60659E+12 | 36662021872 | 2.82981E+16  | 74919786842 | 3.61383E+11 | acetoacetate decarboxylase activity      | Catalysis of the reaction: acetoacetate + H(+) = acetone + CO(2).                                                         |
| GO:0047605 | 1 | 7  | 60795 | 1854 | 46176723 | 1.15141E+12 | 40148487035 | 1.51998E+16  | 1.25458E+16 | 2.63891E+16 | acetolactate decarboxylase activity      | Catalysis of the reaction: (S)-2-hydroxy-2-methyl-3-oxobutanoate = (R)-2-acetoin + CO2.                                   |
| GO:0047653 | 1 | 16 | 60795 | 2750 | 46175827 | 2.6318E+11  | 59551423596 | 2.14384E+15  | 13729373584 | 1.27104E+11 | allantoin racemase activity              | Catalysis of the reaction: (S)-(-)-allantoin = (R)-(-)-allantoin.                                                         |
| GO:0047653 | 3 | 6  | 26855 | 2750 | 46175827 | 2.23422E+12 | 59551423596 | 1.90756E+15  | 6.00794E+14 | 1.43891E+15 | allantoin racemase activity              | Catalysis of the reaction: (S)-(-)-allantoin = (R)-(-)-allantoin.                                                         |
| GO:0047653 | 2 | 7  | 22861 | 2750 | 46175827 | 3.06198E+12 | 59551423596 | 2.36226E+16  | 5.25997E+11 | 1.79788E+16 | allantoin racemase activity              | Catalysis of the reaction: (S)-(-)-allantoin = (R)-(-)-allantoin.                                                         |
| GO:0047689 | 3 | 23 | 26855 | 8652 | 46169925 | 8.56451E+11 | 1.8736E+12  | 2.19256E+15  | 4287417.934 | 79384523.09 | aspartate racemase activity              | Catalysis of the reaction: L-aspartate = D-aspartate.                                                                     |
| GO:0047689 | 2 | 11 | 22861 | 8652 | 46169925 | 4.81169E+11 | 1.8736E+12  | 1.36073E+16  | 4.67552E+15 | 1.16718E+13 | aspartate racemase activity              | Catalysis of the reaction: L-aspartate = D-aspartate.                                                                     |
| GO:0047705 | 3 | 7  | 26855 | 327  | 46178250 | 2.60659E+12 | 7081205642  | 5.20203E+15  | 14205422.6  | 29877163.37 | bilirubin oxidase activity               | Catalysis of the reaction: 2 bilirubin + O(2) = 2 biliverdin + 2 H(2)O.                                                   |
| GO:0047728 | 1 | 10 | 60795 | 1410 | 46177167 | 1.64487E+12 | 3053363901  | 2.4295E+16   | 24546016374 | 1.40765E+11 | carnitine 3-dehydrogenase activity       | Catalysis of the reaction: carnitine + NAD(+) = 3-dehydrocarnitine + H(+) + NADH.                                         |
| GO:0047728 | 2 | 4  | 22861 | 1410 | 46177167 | 1.7497E+12  | 3053363901  | 2.51864E+15  | 5.68064E+15 | 1.37407E+16 | carnitine 3-dehydrogenase activity       | Catalysis of the reaction: carnitine + NAD(+) = 3-dehydrocarnitine + H(+) + NADH.                                         |
| GO:0047733 | 1 | 2  | 60795 | 6518 | 46172059 | 3289744222  | 1.41148E+12 | -2.10116E+15 | 8.67233E+15 | 1.96101E+16 | CDP-glucose 4,6-dehydratase activity     | Catalysis of the reaction: CDP-D-glucose = CDP-4-dehydro-6-deoxy-D-glucose + H(2)O.                                       |
| GO:0047739 | 2 | 5  | 22861 | 1939 | 46176638 | 2.18713E+12 | 41989167401 | 2.38095E+16  | 3.07047E+16 | 8.18462E+15 | cephalosporin-C deacetylase activity     | Catalysis of the reaction: cephalosporin C + H(2)O = acetate + deacetylcephalosporin C + H(+).                            |
| GO:0047753 | 1 | 17 | 60795 | 4776 | 46173801 | 2.79628E+11 | 1.03425E+12 | 1.43493E+16  | 2.93792E+12 | 1.10884E+16 | choline-sulfatase activity               | Catalysis of the reaction: choline sulfate + H(2)O = choline + H(+) + sulfate.                                            |
| GO:0047777 | 1 | 19 | 60795 | 6490 | 46172087 | 3.12526E+11 | 1.40541E+12 | 1.15298E+15  | 1.36242E+16 | 4.11818E+15 | (S)-citramalyl-CoA lyase activity        | Catalysis of the reaction: (3S)-citramalyl-CoA = acetyl-CoA + pyruvate.                                                   |
| GO:0047777 | 3 | 10 | 26855 | 6490 | 46172087 | 3.7237E+11  | 1.40541E+12 | 1.40574E+16  | 5.52294E+15 | 1.34222E+16 | (S)-citramalyl-CoA lyase activity        | Catalysis of the reaction: (3S)-citramalyl-CoA = acetyl-CoA + pyruvate.                                                   |
| GO:0047777 | 2 | 9  | 22861 | 6490 | 46172087 | 3.93684E+12 | 1.40541E+12 | 1.48604E+16  | 5.84188E+16 | 1.40648E+16 | (S)-citramalyl-CoA lyase activity        | Catalysis of the reaction: (3S)-citramalyl-CoA = acetyl-CoA + pyruvate.                                                   |



|            |   |    |       |       |          |             |             |             |             |             |                                                    |                                                                                                                                                            |
|------------|---|----|-------|-------|----------|-------------|-------------|-------------|-------------|-------------|----------------------------------------------------|------------------------------------------------------------------------------------------------------------------------------------------------------------|
| GO:0047794 | 3 | 11 | 26855 | 6775  | 46171802 | 4.09607E+12 | 1.46713E+11 | 1.48124E+16 | 2.52545E+15 | 6.90569E+16 | cyclohexadienyl dehydrogenase activity             | Catalysis of the reaction: L-arogenate + NAD+ = L-tyrosine + NADH + CO2.                                                                                   |
| GO:0047810 | 3 | 21 | 26855 | 15361 | 46163216 | 7.81977E+11 | 3.32643E+12 | 1.23315E+16 | 3.968E+12   | 1.41975E+16 | D-alanine:2-oxoglutarate aminotransferase activity | Catalysis of the reaction: D-alanine + 2-oxoglutarate = pyruvate + D-glutamate.                                                                            |
| GO:0047813 | 3 | 6  | 26855 | 538   | 46178039 | 2.23422E+12 | 1.16504E+11 | 4.26132E+15 | 971912568.5 | 9420251163  | D-arabinitol 4-dehydrogenase activity              | Catalysis of the reaction: D-arabinitol + NAD+ = D-xylulose + NADH.                                                                                        |
| GO:0047833 | 3 | 6  | 26855 | 750   | 46177827 | 2.23422E+12 | 1.62413E+11 | 3.78203E+15 | 6473828920  | 46977925503 | D-sorbitol dehydrogenase (acceptor) activity       | Catalysis of the reaction: D-sorbitol + acceptor = L-sorbose + reduced acceptor.                                                                           |
| GO:0047834 | 2 | 6  | 22861 | 3674  | 46174903 | 2.62456E+11 | 79560701925 | 1.72195E+16 | 1.0852E+16  | 2.34597E+15 | D-threo-aldose 1-dehydrogenase activity            | Catalysis of the reaction: a D-threo-aldose + NAD+ = a D-threo-aldono-1,5-lactone + NADH.                                                                  |
| GO:0047841 | 3 | 6  | 26855 | 164   | 46178413 | 2.23422E+12 | 3551430353  | 5.97523E+15 | 880329.1414 | 19862726.91 | dehydrogluconokinase activity                      | Catalysis of the reaction: 2-dehydro-D-gluconate + ATP = 6-phospho-2-dehydro-D-gluconate + ADP + 2 H(+).                                                   |
| GO:0047865 | 1 | 13 | 60795 | 2622  | 46175955 | 2.13833E+11 | 5677957552  | 1.91304E+16 | 65188774966 | 3.23904E+12 | dimethylglycine dehydrogenase activity             | Catalysis of the reaction: N,N-dimethylglycine + electron-transfer flavoprotein + H2O = sarcosine + formaldehyde + reduced electron-transfer flavoprotein. |
| GO:0047865 | 3 | 5  | 26855 | 2622  | 46175955 | 1.86185E+11 | 5677957552  | 1.71329E+14 | 1.97295E+16 | 3.83355E+15 | dimethylglycine dehydrogenase activity             | Catalysis of the reaction: N,N-dimethylglycine + electron-transfer flavoprotein + H2O = sarcosine + formaldehyde + reduced electron-transfer flavoprotein. |
| GO:0047865 | 2 | 10 | 22861 | 2622  | 46175955 | 4.37426E+11 | 5677957552  | 2.9456E+15  | 11402579192 | 1.07985E+11 | dimethylglycine dehydrogenase activity             | Catalysis of the reaction: N,N-dimethylglycine + electron-transfer flavoprotein + H2O = sarcosine + formaldehyde + reduced electron-transfer flavoprotein. |
| GO:0047878 | 1 | 6  | 60795 | 442   | 46178135 | 98692326672 | 9571537902  | 3.36612E+16 | 31930992682 | 1.75732E+11 | erythritol kinase activity                         | Catalysis of the reaction: ATP + erythritol = D-erythritol 4-phosphate + ADP + 2 H(+).                                                                     |
| GO:0047889 | 3 | 4  | 26855 | 1764  | 46176813 | 1.48948E+12 | 3.81995E+11 | 1.96318E+16 | 2.05747E+15 | 3.96223E+15 | ferredoxin-nitrate reductase activity              | Catalysis of the reaction: nitrite + H2O + 2 oxidized ferredoxin = nitrate + 2 reduced ferredoxin.                                                         |
| GO:0047905 | 2 | 16 | 22861 | 8666  | 46169911 | 6.99882E+11 | 1.87663E+12 | 1.89897E+16 | 1.1352E+11  | 75478967277 | fructose-6-phosphate phosphoketolase activity      | Catalysis of the reaction: D-fructose 6-phosphate + phosphate = acetyl phosphate + D-erythrose 4-phosphate + H2O.                                          |
| GO:0047922 | 3 | 8  | 26855 | 1882  | 46176695 | 2.97896E+11 | 4.07548E+11 | 2.86977E+15 | 1.91942E+11 | 1.1571E+12  | gentisate 1,2-dioxygenase activity                 | Catalysis of the reaction: 2,5-dihydroxybenzoate + O(2) = 3-maleylpyruvate + H(+).                                                                         |
| GO:0047925 | 1 | 13 | 60795 | 1884  | 46176693 | 2.13833E+11 | 40798138929 | 2.38991E+16 | 21300201654 | 1.85938E+11 | geranoyl-CoA carboxylase activity                  | Catalysis of the reaction: ATP + bicarbonate + geranoyl-CoA = 3-(4-methylpent-3-en-1-yl)pent-2-enedioyl-CoA + ADP + 2 H(+)                                 |
| GO:0047925 | 3 | 18 | 26855 | 1884  | 46176693 | 6.70266E+11 | 40798138929 | 4.03816E+15 | 0.265542148 | 249.1871658 | geranoyl-CoA carboxylase activity                  | Catalysis of the reaction: ATP + bicarbonate + geranoyl-CoA = 3-(4-methylpent-3-en-1-yl)pent-2-enedioyl-CoA + ADP + 2 H(+)                                 |
| GO:0047925 | 2 | 8  | 22861 | 1884  | 46176693 | 3.49941E+16 | 40798138929 | 3.10054E+15 | 61491864894 | 4509767498  | geranoyl-CoA carboxylase activity                  | Catalysis of the reaction: ATP + bicarbonate + geranoyl-CoA = 3-(4-methylpent-3-en-1-yl)pent-2-enedioyl-CoA + ADP + 2 H(+)                                 |

|            |   |    |       |       |          |             |             |              |             |             |                                                      |                                                                                                                                      |
|------------|---|----|-------|-------|----------|-------------|-------------|--------------|-------------|-------------|------------------------------------------------------|--------------------------------------------------------------------------------------------------------------------------------------|
| GO:0047931 | 1 | 14 | 60795 | 2224  | 46176353 | 2.30282E+12 | 4816086039  | 2.25747E+15  | 2518391088  | 20964590331 | glucosamine kinase activity                          | Catalysis of the reaction: ATP + D-glucosamine = ADP + D-glucosamine phosphate.                                                      |
| GO:0047938 | 1 | 15 | 60795 | 4845  | 46173732 | 2.46731E+11 | 1.04919E+12 | 1.23366E+16  | 2.467E+16   | 6.78912E+14 | glucose-6-phosphate 1-epimerase activity             | Catalysis of the reaction: alpha-D-glucose 6-phosphate = beta-D-glucose 6-phosphate.                                                 |
| GO:0047938 | 3 | 13 | 26855 | 4845  | 46173732 | 4.84081E+11 | 1.04919E+12 | 2.20598E+16  | 8342147472  | 57987755745 | glucose-6-phosphate 1-epimerase activity             | Catalysis of the reaction: alpha-D-glucose 6-phosphate = beta-D-glucose 6-phosphate.                                                 |
| GO:0047949 | 2 | 58 | 22861 | 50815 | 46127762 | 2.53707E+16 | 1.1004E+16  | 1.20513E+15  | 145875509.2 | 241895573.3 | glutarate-semialdehyde dehydrogenase (NAD+) activity | Catalysis of the reaction: glutarate semialdehyde + NAD+ + H2O = glutarate + NADH.                                                   |
| GO:0047949 | 3 | 81 | 26855 | 50815 | 46127762 | 3.0162E+15  | 1.1004E+16  | 1.4547E+16   | 47.80958135 | 318.3963893 | glutarate-semialdehyde dehydrogenase (NAD+) activity | Catalysis of the reaction: glutarate semialdehyde + NAD+ + H2O = glutarate + NADH.                                                   |
| GO:0047971 | 1 | 4  | 60795 | 832   | 46177745 | 6579488445  | 1.8017E+11  | 1.86862E+15  | 2.53063E+16 | 4.69828E+15 | guanidinobutyrase activity                           | Catalysis of the reaction: 4-guanidinobutanoate + H(2)O = 4-aminobutanoate + urea.                                                   |
| GO:0047971 | 3 | 7  | 26855 | 832   | 46177745 | 2.60659E+12 | 1.8017E+11  | 3.85473E+15  | 789765389.5 | 7857689863  | guanidinobutyrase activity                           | Catalysis of the reaction: 4-guanidinobutanoate + H(2)O = 4-aminobutanoate + urea.                                                   |
| GO:0047972 | 2 | 3  | 22861 | 1104  | 46177473 | 1.31228E+11 | 2.39072E+11 | 2.45656E+15  | 1.81312E+16 | 3.5923E+16  | guanidinopropionase activity                         | Catalysis of the reaction: 3-guanidinopropanoate + H(2)O = beta-alanine + urea.                                                      |
| GO:0047980 | 3 | 59 | 26855 | 26794 | 46151783 | 2.19698E+16 | 5.80226E+11 | 1.92084E+16  | 0.035905864 | 4.118203138 | hippurate hydrolase activity                         | Catalysis of the reaction: N-benzoylglycine + H(2)O = benzoate + glycine.                                                            |
| GO:0047980 | 2 | 40 | 22861 | 26794 | 46151783 | 1.7497E+16  | 5.80226E+11 | 1.59243E+16  | 2457533.135 | 490200691.6 | hippurate hydrolase activity                         | Catalysis of the reaction: N-benzoylglycine + H(2)O = benzoate + glycine.                                                            |
| GO:0047985 | 3 | 30 | 26855 | 7243  | 46171334 | 1.11711E+16 | 1.56848E+12 | 2.83234E+16  | 3.316642745 | 29.77047368 | hydrogen dehydrogenase activity                      | Catalysis of the reaction: H2 + NAD+ = H+ + NADH.                                                                                    |
| GO:0048001 | 1 | 8  | 60795 | 1724  | 46176853 | 1.3159E+11  | 3.73333E+11 | 1.81751E+15  | 2.36942E+16 | 6.54842E+16 | erythrose-4-phosphate dehydrogenase activity         | Catalysis of the reaction: D-erythrose 4-phosphate + H(2)O + NAD(+) = 4-phospho-D-erythronate + 2 H(+) + NADH.                       |
| GO:0048040 | 3 | 13 | 26855 | 10161 | 46168416 | 4.84081E+11 | 2.20037E+11 | 1.1375E+16   | 7.82405E+15 | 1.80276E+16 | UDP-glucuronate decarboxylase activity               | Catalysis of the reaction: H(+) + UDP-alpha-D-glucuronate = CO(2) + UDP-alpha-D-xylose.                                              |
| GO:0048040 | 1 | 5  | 60795 | 10161 | 46168416 | 82243605560 | 2.20037E+11 | -1.41977E+16 | 8.34587E+15 | 1.90072E+16 | UDP-glucuronate decarboxylase activity               | Catalysis of the reaction: H(+) + UDP-alpha-D-glucuronate = CO(2) + UDP-alpha-D-xylose.                                              |
| GO:0048244 | 3 | 5  | 26855 | 1139  | 46177438 | 1.86185E+11 | 2.46651E+11 | 2.91619E+16  | 6.10431E+11 | 2.02936E+16 | phytanoyl-CoA dioxygenase activity                   | Catalysis of the reaction: 2-oxoglutarate + O(2) + phytanoyl-CoA = 2-hydroxyphytanoyl-CoA + CO(2) + succinate.                       |
| GO:0048472 | 1 | 29 | 60795 | 5014  | 46173563 | 4.77013E+12 | 1.08578E+11 | 2.13529E+15  | 1095099.532 | 29361467.32 | threonine-phosphate decarboxylase activity           | Catalysis of the reaction: O-phospho-L-threonine + H(+) = (R)-1-aminopropan-2-yl phosphate + CO(2).                                  |
| GO:0050005 | 1 | 6  | 60795 | 936   | 46177641 | 98692326672 | 2.02691E+11 | 2.28365E+16  | 1.6949E+16  | 4.93876E+15 | isohexenylglutaconyl-CoA hydratase activity          | Catalysis of the reaction: 3-hydroxy-3-(4-methylpent-3-en-1-yl)glutaryl-CoA = 3-(4-methylpent-3-en-1-yl)pent-2-enedioyl-CoA + H(2)O. |
| GO:0050005 | 3 | 6  | 26855 | 936   | 46177641 | 2.23422E+12 | 2.02691E+11 | 3.46242E+15  | 2.24016E+11 | 1.31949E+12 | isohexenylglutaconyl-CoA hydratase activity          | Catalysis of the reaction: 3-hydroxy-3-(4-methylpent-3-en-1-yl)glutaryl-CoA = 3-(4-methylpent-3-en-1-yl)pent-2-enedioyl-CoA + H(2)O. |
| GO:0050020 | 3 | 6  | 26855 | 462   | 46178115 | 2.23422E+12 | 1.00046E+11 | 4.48103E+15  | 40285207.38 | 4331708887  | L-arabinonate dehydratase activity                   | Catalysis of the reaction: L-arabinonate = 2-dehydro-3-deoxy-L-arabinonate + H(2)O.                                                  |

|            |   |    |       |       |          |             |             |             |             |             |                                              |                                                                                                                    |
|------------|---|----|-------|-------|----------|-------------|-------------|-------------|-------------|-------------|----------------------------------------------|--------------------------------------------------------------------------------------------------------------------|
| GO:0050020 | 2 | 2  | 22861 | 462   | 46178115 | 87485236866 | 1.00046E+11 | 3.12837E+16 | 2.24541E+16 | 4.2454E+16  | L-arabinonate dehydratase activity           | Catalysis of the reaction: L-arabinonate = 2-dehydro-3-deoxy-L-arabinonate + H(2)O.                                |
| GO:0050023 | 2 | 7  | 22861 | 2955  | 46175622 | 3.06198E+12 | 63990711537 | 2.25853E+16 | 7.98111E+11 | 2.58869E+15 | L-fuconate dehydratase activity              | Catalysis of the reaction: L-fuconate = 2-dehydro-3-deoxy-L-fuconate + H(2)O.                                      |
| GO:0050023 | 3 | 7  | 26855 | 2955  | 46175622 | 2.60659E+12 | 63990711537 | 2.02623E+16 | 1.98201E+16 | 5.66348E+15 | L-fuconate dehydratase activity              | Catalysis of the reaction: L-fuconate = 2-dehydro-3-deoxy-L-fuconate + H(2)O.                                      |
| GO:0050044 | 1 | 6  | 60795 | 294   | 46178283 | 98692326672 | 6366588559  | 3.95435E+15 | 3207667305  | 25868082621 | galactose-6-phosphate isomerase activity     | Catalysis of the reaction: D-galactose 6-phosphate = D-tagatose 6-phosphate.                                       |
| GO:0050074 | 3 | 6  | 26855 | 2048  | 46176529 | 2.23422E+12 | 44349569282 | 2.33278E+16 | 1.43763E+16 | 4.32022E+15 | malate-CoA ligase activity                   | Catalysis of the reaction: ATP + malate + CoA = ADP + phosphate + malyl-CoA.                                       |
| GO:0050076 | 1 | 10 | 60795 | 3479  | 46175098 | 1.64487E+12 | 75337964615 | 1.12653E+16 | 1.89484E+16 | 3.72029E+14 | maleate isomerase activity                   | Catalysis of the reaction: maleate = fumarate.                                                                     |
| GO:0050077 | 3 | 22 | 26855 | 11525 | 46167052 | 8.19214E+11 | 2.49575E+12 | 1.71477E+16 | 22705452585 | 19290290889 | maleylpyruvate isomerase activity            | Catalysis of the reaction: 3-maleylpyruvate = 3-fumarylpyruvate.                                                   |
| GO:0050080 | 3 | 14 | 26855 | 3962  | 46174615 | 5.21318E+11 | 85797360105 | 2.60316E+16 | 157579846.6 | 19597806826 | malonyl-CoA decarboxylase activity           | Catalysis of the reaction: malonyl-CoA = acetyl-CoA + CO2.                                                         |
| GO:0050081 | 1 | 8  | 60795 | 834   | 46177743 | 1.3159E+11  | 1.80603E+11 | 2.86515E+16 | 1.9368E+11  | 1.16575E+12 | maltose-6'-phosphate glucosidase activity    | Catalysis of the reaction: H2O + maltose 6'-phosphate = D-glucose + D-glucose 6-phosphate.                         |
| GO:0050082 | 1 | 10 | 60795 | 2009  | 46176568 | 1.64487E+12 | 43505021820 | 1.91872E+16 | 4.23037E+11 | 1.49933E+16 | maltose phosphorylase activity               | Catalysis of the reaction: maltose + phosphate = D-glucose + beta-D-glucose 1-phosphate.                           |
| GO:0050083 | 1 | 19 | 60795 | 6006  | 46172571 | 3.12526E+11 | 1.3006E+12  | 1.26479E+15 | 5.61438E+11 | 1.90483E+16 | malyl-CoA lyase activity                     | Catalysis of the reaction: (3S)-3-carboxy-3-hydroxypropanoyl-CoA = acetyl-CoA + glyoxylate.                        |
| GO:0050083 | 3 | 9  | 26855 | 6006  | 46172571 | 3.35133E+12 | 1.3006E+12  | 1.36555E+16 | 9.7255E+15  | 2.1394E+16  | malyl-CoA lyase activity                     | Catalysis of the reaction: (3S)-3-carboxy-3-hydroxypropanoyl-CoA = acetyl-CoA + glyoxylate.                        |
| GO:0050083 | 2 | 9  | 22861 | 6006  | 46172571 | 3.93684E+12 | 1.3006E+12  | 1.59786E+16 | 3.57935E+16 | 9.33027E+15 | malyl-CoA lyase activity                     | Catalysis of the reaction: (3S)-3-carboxy-3-hydroxypropanoyl-CoA = acetyl-CoA + glyoxylate.                        |
| GO:0050086 | 1 | 14 | 60795 | 2750  | 46175827 | 2.30282E+12 | 59551423596 | 1.95119E+16 | 2624478853  | 1.47951E+12 | mannitol 2-dehydrogenase activity            | Catalysis of the reaction: D-mannitol + NAD+ = D-fructose + NADH.                                                  |
| GO:0050097 | 3 | 8  | 26855 | 752   | 46177825 | 2.97896E+11 | 1.62846E+11 | 4.19323E+15 | 21757485.72 | 3468596854  | methyiaspartate mutase activity              | Catalysis of the reaction: threo-3-methyl-L-aspartate = L-glutamate.                                               |
| GO:0050112 | 1 | 24 | 60795 | 6579  | 46171998 | 3.94769E+11 | 1.42469E+12 | 1.47037E+16 | 1.31802E+11 | 85033055553 | inositol 2-dehydrogenase activity            | Catalysis of the reaction: myo-inositol + NAD(+) = 2,4,6/3,5-pentahydroxycyclohexanone + H(+) + NADH.              |
| GO:0050112 | 3 | 14 | 26855 | 6579  | 46171998 | 5.21318E+11 | 1.42469E+12 | 1.87152E+16 | 47578794046 | 24649038973 | inositol 2-dehydrogenase activity            | Catalysis of the reaction: myo-inositol + NAD(+) = 2,4,6/3,5-pentahydroxycyclohexanone + H(+) + NADH.              |
| GO:0050114 | 1 | 23 | 60795 | 6043  | 46172534 | 3.78321E+11 | 1.30862E+12 | 1.53157E+16 | 1.02418E+11 | 68873699601 | myo-inosose-2 dehydratase activity           | Catalysis of the reaction: 2,4,6/3,5-pentahydroxycyclohexanone = 3D-3,5/4-trihydroxycyclohexane-1,2-dione + H(2)O. |
| GO:0050114 | 3 | 9  | 26855 | 6043  | 46172534 | 3.35133E+12 | 1.30862E+12 | 1.35669E+16 | 1.00894E+16 | 2.20764E+16 | myo-inosose-2 dehydratase activity           | Catalysis of the reaction: 2,4,6/3,5-pentahydroxycyclohexanone = 3D-3,5/4-trihydroxycyclohexane-1,2-dione + H(2)O. |
| GO:0050118 | 1 | 5  | 60795 | 804   | 46177773 | 82243605560 | 17410670753 | 2.23993E+15 | 4.60189E+15 | 1.15299E+16 | N-acetyldiaminopimelate deacetylase activity | Catalysis of the reaction: N-acetyl-LL-2,6-diaminopimelate + H(2)O = LL-2,6-diaminopimelate + acetate.             |

|            |   |    |       |       |          |             |             |              |             |             |                                           |                                                                                                                        |
|------------|---|----|-------|-------|----------|-------------|-------------|--------------|-------------|-------------|-------------------------------------------|------------------------------------------------------------------------------------------------------------------------|
| GO:0050129 | 2 | 6  | 22861 | 3650  | 46174927 | 2.62456E+11 | 79040980410 | 1.7314E+16   | 1.05361E+16 | 2.28845E+15 | N-formylglutamate deformylase activity    | Catalysis of the reaction: N-formyl-L-glutamate + H(2)O = L-glutamate + formate.                                       |
| GO:0050150 | 2 | 4  | 22861 | 633   | 46177944 | 1.7497E+12  | 1.37077E+11 | 3.67406E+16  | 3.10573E+12 | 1.16366E+16 | o-pyrocatechuate decarboxylase activity   | Catalysis of the reaction: 2,3-dihydroxybenzoate + H(+) = catechol + CO(2).                                            |
| GO:0050151 | 1 | 8  | 60795 | 1120  | 46177457 | 1.3159E+11  | 24253670701 | 2.43977E+15  | 1.48623E+12 | 6.2555E+11  | oleate hydratase activity                 | Catalysis of the reaction: (R)-10-hydroxystearate = H(2)O + oleate.                                                    |
| GO:0050155 | 2 | 17 | 22861 | 10385 | 46168192 | 7436245134  | 2.24888E+11 | 1.72537E+16  | 27725614812 | 1.54902E+11 | ornithine(lysine) transaminase activity   | Catalysis of the reaction: 2-oxoglutarate + L-ornithine = H2O + L-glutamate + 3,4-dihydro-2H-pyrrole-2-carboxylate.    |
| GO:0050193 | 2 | 16 | 22861 | 8666  | 46169911 | 6.99882E+11 | 1.87663E+12 | 1.89897E+16  | 1.1352E+11  | 75478967277 | phosphoketolase activity                  | Catalysis of the reaction: D-xylulose 5-phosphate + phosphate = acetyl phosphate + D-glyceraldehyde 3-phosphate + H2O. |
| GO:0050218 | 3 | 21 | 26855 | 9953  | 46168624 | 7.81977E+11 | 2.15533E+12 | 1.85922E+16  | 822117700.7 | 8082199968  | propionate-CoA ligase activity            | Catalysis of the reaction: ATP + propanoate + CoA = AMP + diphosphate + propanoyl-CoA.                                 |
| GO:0050225 | 1 | 6  | 60795 | 1348  | 46177229 | 98692326672 | 2.9191E+11  | 1.75741E+16  | 9.67948E+14 | 2.13232E+16 | pseudouridine kinase activity             | Catalysis of the reaction: ATP + pseudouridine = ADP + 2 H(+) + pseudouridine 5'-phosphate.                            |
| GO:0050232 | 2 | 5  | 22861 | 390   | 46178187 | 2.18713E+12 | 844547461.9 | 4.69472E+15  | 18587699336 | 1.63993E+11 | putrescine oxidase activity               | Catalysis of the reaction: putrescine + O2 + H2O = 4-aminobutanal + NH3 + H2O2.                                        |
| GO:0050255 | 1 | 8  | 60795 | 583   | 46177994 | 1.3159E+11  | 1.26249E+11 | 3.3817E+15   | 1455483798  | 1.33846E+11 | ribitol 2-dehydrogenase activity          | Catalysis of the reaction: D-ribitol + NAD(+) = D-ribulose + H(+) + NADH.                                              |
| GO:0050262 | 1 | 5  | 60795 | 583   | 46177994 | 82243605560 | 1.26249E+11 | 2.70363E+15  | 1.16368E+16 | 3.60996E+16 | ribosylnicotinamide kinase activity       | Catalysis of the reaction: N-ribosylnicotinamide + ATP = ADP + 2 H(+) + nicotinamide mononucleotide.                   |
| GO:0050269 | 1 | 19 | 60795 | 5579  | 46172998 | 3.12526E+11 | 1.20814E+12 | 1.37119E+16  | 2.3219E+12  | 9.10351E+11 | coniferyl-aldehyde dehydrogenase activity | Catalysis of the reaction: coniferyl aldehyde + H2O + NAD(P)+ = ferulate + NAD(P)H + H+.                               |
| GO:0050269 | 3 | 19 | 26855 | 5579  | 46172998 | 7.07503E+11 | 1.20814E+12 | 2.54995E+15  | 19168440.85 | 389884198.4 | coniferyl-aldehyde dehydrogenase activity | Catalysis of the reaction: coniferyl aldehyde + H2O + NAD(P)+ = ferulate + NAD(P)H + H+.                               |
| GO:0050270 | 1 | 6  | 60795 | 12330 | 46166247 | 98692326672 | 2.67007E+12 | -1.43587E+16 | 3.41996E+16 | 8.96004E+15 | S-adenosylhomocysteine deaminase activity | Catalysis of the reaction: S-adenosyl-L-homocysteine + H(2)O + H(+) = S-inosyl-L-homocysteine + NH(4)(+).              |
| GO:0050278 | 3 | 18 | 26855 | 7882  | 46170695 | 6.70266E+11 | 1.70685E+12 | 1.9734E+15   | 16470643535 | 1.48812E+11 | sedoheptulose-bisphosphatase activity     | Catalysis of the reaction: sedoheptulose 1,7-bisphosphate + H2O = sedoheptulose 7-phosphate + phosphate.               |
| GO:0050289 | 1 | 4  | 60795 | 232   | 46178345 | 6579488445  | 5023974645  | 3.71107E+15  | 2.78171E+11 | 1.06152E+15 | spermidine dehydrogenase activity         | Catalysis of the reaction: spermidine + acceptor + H2O = 1,3-diaminopropane + 4-aminobutanal + reduced acceptor.       |
| GO:0050304 | 3 | 10 | 26855 | 3486  | 46175091 | 3.7237E+11  | 75489550057 | 2.30239E+16  | 51481530315 | 2.64387E+11 | nitrous-oxide reductase activity          | Catalysis of the reaction: H(2)O + 2 cytochrome c + nitrogen = 2 reduced cytochrome c + nitrous oxide.                 |
| GO:0050304 | 2 | 6  | 22861 | 3486  | 46175091 | 2.62456E+11 | 75489550057 | 1.79773E+16  | 8.54924E+15 | 1.93955E+15 | nitrous-oxide reductase activity          | Catalysis of the reaction: H(2)O + 2 cytochrome c + nitrogen = 2 reduced cytochrome c + nitrous oxide.                 |
| GO:0050308 | 2 | 10 | 22861 | 5841  | 46172736 | 4.37426E+11 | 1.26487E+11 | 1.79005E+16  | 83576432847 | 2.69179E+15 | sugar-phosphatase activity                | Catalysis of the reaction: sugar phosphate + H2O = sugar + phosphate.                                                  |
| GO:0050308 | 1 | 29 | 60795 | 5841  | 46172736 | 4.77013E+12 | 1.26487E+11 | 1.91504E+16  | 32690784.42 | 63669928.7  | sugar-phosphatase activity                | Catalysis of the reaction: sugar phosphate + H2O = sugar + phosphate.                                                  |

|            |   |    |       |       |          |             |             |             |             |             |                                              |                                                                                                                                                                 |
|------------|---|----|-------|-------|----------|-------------|-------------|-------------|-------------|-------------|----------------------------------------------|-----------------------------------------------------------------------------------------------------------------------------------------------------------------|
| GO:0050311 | 2 | 11 | 22861 | 10965 | 46167612 | 4.81169E+11 | 2.37448E+12 | 1.01893E+16 | 2.32201E+15 | 4.35998E+16 | sulfite reductase (ferredoxin) activity      | Catalysis of the reaction: hydrogen sulfide + 3 oxidized ferredoxin + 3 H <sub>2</sub> O = sulfite + 3 reduced ferredoxin.                                      |
| GO:0050319 | 3 | 25 | 26855 | 7826  | 46170751 | 93092533979 | 1.69473E+12 | 2.45761E+16 | 226133.8022 | 707353.386  | tartrate decarboxylase activity              | Catalysis of the reaction: L-tartrate + H(+) = D-glycerate + CO(2).                                                                                             |
| GO:0050319 | 2 | 11 | 22861 | 7826  | 46170751 | 4.81169E+11 | 1.69473E+12 | 1.50549E+16 | 2.22561E+16 | 6.23865E+16 | tartrate decarboxylase activity              | Catalysis of the reaction: L-tartrate + H(+) = D-glycerate + CO(2).                                                                                             |
| GO:0050322 | 2 | 6  | 22861 | 3679  | 46174898 | 2.62456E+11 | 79668977240 | 1.71998E+16 | 1.09187E+16 | 2.35791E+16 | taurine-2-oxoglutarate transaminase activity | Catalysis of the reaction: taurine + 2-oxoglutarate = sulfoacetaldehyde + L-glutamate.                                                                          |
| GO:0050338 | 3 | 12 | 26855 | 4237  | 46174340 | 4.46844E+12 | 9175250246  | 2.28395E+15 | 1.08144E+11 | 72370694426 | thiosulfate dehydrogenase activity           | Catalysis of the reaction: 2 thiosulfate + 2 ferricytochrome c = tetrathionate + 2 ferrocyclochrome c.                                                          |
| GO:0050343 | 1 | 9  | 60795 | 2926  | 46175651 | 1.48038E+12 | 63362714706 | 1.22427E+16 | 1.72057E+15 | 3.43865E+13 | trans-2-enoyl-CoA reductase (NAD+) activity  | Catalysis of the reaction: acyl-CoA + NAD+ = trans-didehydroacyl-CoA + NADH.                                                                                    |
| GO:0050355 | 1 | 6  | 60795 | 690   | 46177887 | 98692326672 | 1.4942E+11  | 2.72357E+16 | 3.54986E+11 | 1.28686E+16 | triphosphatase activity                      | Catalysis of the reaction: H(2)O + triphosphate = diphosphate + phosphate.                                                                                      |
| GO:0050361 | 3 | 6  | 26855 | 332   | 46178245 | 2.23422E+12 | 7189480958  | 4.95774E+16 | 58421856.15 | 828947917.7 | tryptophan 2-monooxygenase activity          | Catalysis of the reaction: L-tryptophan + O(2) = CO(2) + H(2)O + indole-3-acetamide.                                                                            |
| GO:0050385 | 1 | 23 | 60795 | 5231  | 46173346 | 3.78321E+11 | 1.13278E+12 | 1.73975E+16 | 10090480107 | 9734484196  | ureidoglycolate lyase activity               | Catalysis of the reaction: (S)-ureidoglycolate = glyoxylate + urea.                                                                                             |
| GO:0050385 | 3 | 13 | 26855 | 5231  | 46173346 | 4.84081E+11 | 1.13278E+12 | 2.09539E+15 | 1.8431E+11  | 1.12244E+12 | ureidoglycolate lyase activity               | Catalysis of the reaction: (S)-ureidoglycolate = glyoxylate + urea.                                                                                             |
| GO:0050385 | 2 | 7  | 22861 | 5231  | 46173346 | 3.06198E+12 | 1.13278E+12 | 1.4346E+16  | 1.68096E+16 | 3.37915E+15 | ureidoglycolate lyase activity               | Catalysis of the reaction: (S)-ureidoglycolate = glyoxylate + urea.                                                                                             |
| GO:0050388 | 3 | 10 | 26855 | 3616  | 46174961 | 3.7237E+11  | 7830470826  | 2.24957E+16 | 69430376110 | 3.38593E+11 | uronate dehydrogenase activity               | Catalysis of the reaction: D-galacturonate + H(2)O + NAD(+) = galactarate + 2 H(+) + NADH.                                                                      |
| GO:0050415 | 1 | 38 | 60795 | 8116  | 46170461 | 6.25051E+11 | 1.75752E+12 | 1.83043E+15 | 70754.65367 | 19607111.75 | formimidoylglutamase activity                | Catalysis of the reaction: N-formimidoyl-L-glutamate + H(2)O = L-glutamate + formamide.                                                                         |
| GO:0050415 | 2 | 14 | 22861 | 8116  | 46170461 | 6.12397E+11 | 1.75752E+12 | 1.80092E+16 | 79311929777 | 3.75322E+12 | formimidoylglutamase activity                | Catalysis of the reaction: N-formimidoyl-L-glutamate + H(2)O = L-glutamate + formamide.                                                                         |
| GO:0050415 | 3 | 11 | 26855 | 8116  | 46170461 | 4.09607E+12 | 1.75752E+12 | 1.2207E+16  | 9.25982E+15 | 2.05779E+15 | formimidoylglutamase activity                | Catalysis of the reaction: N-formimidoyl-L-glutamate + H(2)O = L-glutamate + formamide.                                                                         |
| GO:0050417 | 3 | 3  | 26855 | 1008  | 46177569 | 1.11711E+12 | 2.18283E+11 | 2.3555E+16  | 2.17331E+15 | 4.13912E+16 | glutamin-(asparagin-)ase activity            | Catalysis of the reaction: H <sub>2</sub> O + L-glutamine = NH <sub>3</sub> + L-glutamate; and H <sub>2</sub> O + L-asparagine = NH <sub>3</sub> + L-aspartate. |
| GO:0050418 | 1 | 38 | 60795 | 9331  | 46169246 | 6.25051E+11 | 2.02063E+11 | 1.62917E+16 | 30665829.64 | 60294862.19 | hydroxylamine reductase activity             | Catalysis of the reaction: NH <sub>3</sub> + H <sub>2</sub> O + acceptor = hydroxylamine + reduced acceptor.                                                    |
| GO:0050418 | 3 | 14 | 26855 | 9331  | 46169246 | 5.21318E+11 | 2.02063E+11 | 1.36736E+16 | 1.48414E+15 | 4.42457E+15 | hydroxylamine reductase activity             | Catalysis of the reaction: NH <sub>3</sub> + H <sub>2</sub> O + acceptor = hydroxylamine + reduced acceptor.                                                    |
| GO:0050421 | 3 | 14 | 26855 | 3667  | 46174910 | 5.21318E+11 | 79409116483 | 2.71479E+16 | 62381108.8  | 882094514.4 | nitrite reductase (NO-forming) activity      | Catalysis of the reaction: nitric oxide + H <sub>2</sub> O + ferricytochrome c = nitrite + ferrocyclochrome c + 2 H+.                                           |
| GO:0050440 | 2 | 10 | 22861 | 8086  | 46170491 | 4.37426E+11 | 1.75103E+12 | 1.32084E+15 | 8.15013E+15 | 1.86349E+16 | 2-methylcitrate synthase activity            | Catalysis of the reaction: H(2)O + oxaloacetate + propanoyl-CoA = (2R,3S)-2-methylcitrate + CoA + H(+).                                                         |
| GO:0050440 | 3 | 15 | 26855 | 8086  | 46170491 | 5.58555E+11 | 1.75103E+12 | 1.6735E+16  | 1.17415E+12 | 5.1575E+11  | 2-methylcitrate synthase activity            | Catalysis of the reaction: H(2)O + oxaloacetate + propanoyl-CoA = (2R,3S)-2-methylcitrate + CoA + H(+).                                                         |

|            |   |    |       |       |          |             |             |             |             |             |                                               |                                                                                                                                                                                           |
|------------|---|----|-------|-------|----------|-------------|-------------|-------------|-------------|-------------|-----------------------------------------------|-------------------------------------------------------------------------------------------------------------------------------------------------------------------------------------------|
| GO:0050462 | 3 | 10 | 26855 | 7039  | 46171538 | 3.7237E+11  | 1.5243E+11  | 1.28859E+16 | 9.41687E+15 | 2.08932E+15 | N-acetylneuraminase activity                  | Catalysis of the reaction: phosphoenolpyruvate + N-acetyl-D-mannosamine + H <sub>2</sub> O = phosphate + N-acetylneuraminase.                                                             |
| GO:0050480 | 2 | 25 | 22861 | 21909 | 46156668 | 1.09357E+16 | 4.74441E+11 | 1.20474E+14 | 1.6005E+12  | 6.66848E+11 | imidazolonepropionase activity                | Catalysis of the reaction: (S)-3-(4-oxo-4,5-dihydro-1H-imidazol-5-yl)propanoic acid + H(2)O = N-formimidoyl-L-glutamate + H(+).                                                           |
| GO:0050487 | 2 | 3  | 22861 | 653   | 46177924 | 1.31228E+11 | 1.41408E+11 | 3.21414E+16 | 4.41099E+15 | 1.1162E+16  | sulfoacetaldehyde acetyltransferase activity  | Catalysis of the reaction: acetyl phosphate + sulfite = phosphate + sulfoacetaldehyde.                                                                                                    |
| GO:0050503 | 1 | 1  | 60795 | 9     | 46178568 | 16448721112 | 1948955681  | 6.39913E+15 | 1.17865E+16 | 2.50599E+16 | trehalose 6-phosphate phosphorylase activity  | Catalysis of the reaction: trehalose 6-phosphate + phosphate = glucose 6-phosphate + beta-D-glucose 1-phosphate.                                                                          |
| GO:0050519 | 1 | 5  | 60795 | 884   | 46177693 | 82243605560 | 1.91431E+11 | 2.10308E+14 | 6.79788E+15 | 1.60667E+16 | holo-citrate lyase synthase activity          | Catalysis of the reaction: apo-citrate lyase + 2'-(5''-triphosphoribosyl)-3'-dephospho-CoA = diphosphate + holo-citrate lyase.                                                            |
| GO:0050520 | 1 | 14 | 60795 | 3850  | 46174727 | 2.30282E+12 | 83371993035 | 1.46577E+16 | 7.85574E+11 | 2.55203E+14 | phosphatidylcholine synthase activity         | Catalysis of the reaction: CDP-diacylglycerol + choline = 1,2-diacyl-sn-glycero-3-phosphocholine + CMP + H(+).                                                                            |
| GO:0050520 | 3 | 6  | 26855 | 3850  | 46174727 | 2.23422E+12 | 83371993035 | 1.42214E+16 | 2.67638E+16 | 4.91583E+16 | phosphatidylcholine synthase activity         | Catalysis of the reaction: CDP-diacylglycerol + choline = 1,2-diacyl-sn-glycero-3-phosphocholine + CMP + H(+).                                                                            |
| GO:0050526 | 3 | 26 | 26855 | 10173 | 46168404 | 96816235338 | 2.20297E+12 | 2.1358E+15  | 983405.3128 | 21948543.44 | poly(3-hydroxybutyrate) depolymerase activity | Catalysis of the reaction: H <sub>2</sub> O + poly[(R)-3-hydroxybutanoate](n) = poly[(R)-3-hydroxybutanoate](x) + poly[(R)-3-hydroxybutanoate](n-x); x is 1-5.                            |
| GO:0050526 | 2 | 11 | 22861 | 10173 | 46168404 | 4.81169E+11 | 2.20297E+12 | 1.12709E+16 | 1.43305E+16 | 2.9482E+16  | poly(3-hydroxybutyrate) depolymerase activity | Catalysis of the reaction: H <sub>2</sub> O + poly[(R)-3-hydroxybutanoate](n) = poly[(R)-3-hydroxybutanoate](x) + poly[(R)-3-hydroxybutanoate](n-x); x is 1-5.                            |
| GO:0050537 | 2 | 4  | 22861 | 335   | 46178242 | 1.7497E+12  | 7254446147  | 4.5921E+15  | 27157519966 | 1.52355E+12 | mandelamide amidase activity                  | Catalysis of the reaction: (R)-mandelamide + H(2)O = (R)-mandelate + NH(4)(+).                                                                                                            |
| GO:0050538 | 3 | 34 | 26855 | 16550 | 46162027 | 1.26606E+16 | 3.58391E+12 | 1.82074E+15 | 814057.6523 | 18468373.88 | N-carbamoyl-L-amino-acid hydrolase activity   | Catalysis of the reaction: N-carbamoyl-L-2-amino acid + H <sub>2</sub> O = L-2-amino acid + NH <sub>3</sub> + CO <sub>2</sub> . The N-carbamoyl-L-2-amino acid is a 2-ureido carboxylate. |
| GO:0050538 | 2 | 19 | 22861 | 16550 | 46162027 | 8.3111E+11  | 3.58391E+12 | 1.2135E+16  | 8.51243E+11 | 2.73737E+15 | N-carbamoyl-L-amino-acid hydrolase activity   | Catalysis of the reaction: N-carbamoyl-L-2-amino acid + H <sub>2</sub> O = L-2-amino acid + NH <sub>3</sub> + CO <sub>2</sub> . The N-carbamoyl-L-2-amino acid is a 2-ureido carboxylate. |
| GO:0050547 | 3 | 2  | 26855 | 353   | 46178224 | 74474027183 | 7644237283  | 3.28429E+15 | 1.83586E+15 | 3.63214E+15 | vanillin synthase activity                    | Catalysis of the reaction: 3-hydroxy-3-(4-hydroxy-3-methoxyphenyl)propanoyl-CoA = acetyl-CoA + vanillin.                                                                                  |
| GO:0050548 | 3 | 2  | 26855 | 353   | 46178224 | 74474027183 | 7644237283  | 3.28429E+15 | 1.83586E+15 | 3.63214E+15 | trans-feruloyl-CoA hydratase activity         | Catalysis of the reaction: trans-feruloyl-CoA + H <sub>2</sub> O = 4-hydroxy-3-methoxyphenyl-beta-hydroxypropionyl-CoA.                                                                   |
| GO:0050549 | 3 | 5  | 26855 | 2108  | 46176469 | 1.86185E+11 | 4.56489E+11 | 2.02809E+14 | 8.41635E+15 | 1.91466E+16 | cyclohexyl-isocyanide hydratase activity      | Catalysis of the reaction: N-cyclohexylformamide + H(+) = cyclohexyl isocyanide + H(2)O.                                                                                                  |

|            |   |    |       |       |          |             |             |              |             |             |                                                                            |                                                                                                                                                                                                                                       |
|------------|---|----|-------|-------|----------|-------------|-------------|--------------|-------------|-------------|----------------------------------------------------------------------------|---------------------------------------------------------------------------------------------------------------------------------------------------------------------------------------------------------------------------------------|
| GO:0050563 | 3 | 11 | 26855 | 2766  | 46175811 | 4.09607E+12 | 59897904606 | 2.77366E+15  | 10613472127 | 1.01208E+11 | trans-feruloyl-CoA synthase activity                                       | Catalysis of the reaction: ferulic acid + CoASH + ATP = trans-feruloyl-CoA + products of ATP breakdown.                                                                                                                               |
| GO:0050568 | 3 | 28 | 26855 | 15687 | 46162890 | 1.04264E+15 | 3.39703E+12 | 1.61789E+16  | 389955116.3 | 4203980875  | protein-glutamine glutaminase activity                                     | Catalysis of the reaction: protein L-glutamine + H <sub>2</sub> O = protein L-glutamate + NH <sub>3</sub> .                                                                                                                           |
| GO:0050569 | 1 | 10 | 60795 | 563   | 46178014 | 1.64487E+12 | 12191800540 | 3.75399E+15  | 6570777.562 | 1179597415  | glycolaldehyde dehydrogenase activity                                      | Catalysis of the reaction: glycolaldehyde + H(2)O + NAD(+) = glycolate + 2 H(+) + NADH.                                                                                                                                               |
| GO:0050572 | 1 | 7  | 60795 | 1461  | 46177116 | 1.15141E+12 | 31638047227 | 1.86367E+15  | 3.65283E+15 | 9.44704E+15 | L-idonate 5-dehydrogenase activity                                         | Catalysis of the reaction: L-idonate + NAD(P) <sup>+</sup> = 5-dehydrogluconate + NAD(P)H + H <sup>+</sup> .                                                                                                                          |
| GO:0050572 | 3 | 13 | 26855 | 1461  | 46177116 | 4.84081E+11 | 31638047227 | 3.93552E+15  | 8364.497831 | 305637.2703 | L-idonate 5-dehydrogenase activity                                         | Catalysis of the reaction: L-idonate + NAD(P) <sup>+</sup> = 5-dehydrogluconate + NAD(P)H + H <sup>+</sup> .                                                                                                                          |
| GO:0050572 | 2 | 4  | 22861 | 1461  | 46177116 | 1.7497E+12  | 31638047227 | 2.46738E+15  | 6.42147E+15 | 1.52763E+16 | L-idonate 5-dehydrogenase activity                                         | Catalysis of the reaction: L-idonate + NAD(P) <sup>+</sup> = 5-dehydrogluconate + NAD(P)H + H <sup>+</sup> .                                                                                                                          |
| GO:0050582 | 2 | 5  | 22861 | 1443  | 46177134 | 2.18713E+12 | 31248256091 | 2.80719E+16  | 8.54772E+11 | 2.74658E+15 | xylitol oxidase activity                                                   | Catalysis of the reaction: xylitol + O <sub>2</sub> = xylose + H <sub>2</sub> O <sub>2</sub> .                                                                                                                                        |
| GO:0050583 | 1 | 27 | 60795 | 9926  | 46168651 | 4.44115E+12 | 2.14948E+11 | 1.04695E+16  | 4.8252E+11  | 1.67282E+16 | hydrogen dehydrogenase (NADP <sup>+</sup> ) activity                       | Catalysis of the reaction: NADP <sup>+</sup> + H <sub>2</sub> = NADPH + H <sup>+</sup> .                                                                                                                                              |
| GO:0050605 | 1 | 26 | 60795 | 4517  | 46174060 | 4.27667E+11 | 97815920140 | 2.12835E+16  | 10709486.27 | 236467747.7 | superoxide reductase activity                                              | Catalysis of the reaction: superoxide + reduced rubredoxin + 2 H <sup>+</sup> = H <sub>2</sub> O <sub>2</sub> + rubredoxin.                                                                                                           |
| GO:0050606 | 3 | 8  | 26855 | 700   | 46177877 | 2.97896E+11 | 1.51585E+11 | 4.29661E+15  | 125619956.6 | 214332562.2 | 4-carboxy-2-hydroxymuconate semialdehyde hemiacetal dehydrogenase activity | Catalysis of the reaction: 4-carboxy-2-hydroxymuconate semialdehyde hemiacetal + NADP(+) = 2-oxo-2H-pyran-4,6-dicarboxylate + H(+) + NADPH.                                                                                           |
| GO:0050622 | 3 | 3  | 26855 | 60    | 46178517 | 1.11711E+12 | 12993037876 | 6.42589E+15  | 6564413922  | 47468415211 | glycine dehydrogenase (cyanide-forming) activity                           | Catalysis of the reaction: glycine + 2 A = HCN + CO <sub>2</sub> + 2 AH <sub>2</sub> .                                                                                                                                                |
| GO:0050626 | 1 | 6  | 60795 | 794   | 46177783 | 98692326672 | 1.71941E+11 | 2.52102E+16  | 7.36621E+11 | 2.40435E+16 | trimethylamine-N-oxide reductase (cytochrome c) activity                   | Catalysis of the reaction: trimethylamine + 2 (ferricytochrome c)-subunit + H <sub>2</sub> O = trimethylamine-N-oxide + 2 (ferrocyclochrome c)-subunit + 2 H <sup>+</sup> .                                                           |
| GO:0050626 | 3 | 4  | 26855 | 794   | 46177783 | 1.48948E+12 | 1.71941E+11 | 3.11482E+16  | 1.3051E+16  | 3.96525E+16 | trimethylamine-N-oxide reductase (cytochrome c) activity                   | Catalysis of the reaction: trimethylamine + 2 (ferricytochrome c)-subunit + H <sub>2</sub> O = trimethylamine-N-oxide + 2 (ferrocyclochrome c)-subunit + 2 H <sup>+</sup> .                                                           |
| GO:0050627 | 2 | 3  | 22861 | 1020  | 46177557 | 1.31228E+11 | 22088164388 | 2.57073E+16  | 1.47366E+16 | 3.01972E+16 | mycothione reductase activity                                              | Catalysis of the reaction: NAD(P) <sup>+</sup> + mycothiol = NAD(P)H + H <sup>+</sup> + mycothione.                                                                                                                                   |
| GO:0050695 | 3 | 12 | 26855 | 2934  | 46175643 | 4.46844E+12 | 63535955211 | 2.81413E+16  | 260392576   | 30116553119 | benzoylformate decarboxylase activity                                      | Catalysis of the reaction: benzoylformate = benzaldehyde + CO <sub>2</sub> .                                                                                                                                                          |
| GO:0051007 | 1 | 11 | 60795 | 18833 | 46159744 | 1.80936E+12 | 4.0783E+12  | -1.17249E+16 | 1.58602E+16 | 4.66806E+16 | squalene-hopene cyclase activity                                           | Catalysis of the reaction: squalene = hop-22(29)-ene.                                                                                                                                                                                 |
| GO:0051007 | 2 | 1  | 22861 | 18833 | 46159744 | 4.37426E+11 | 4.0783E+12  | -3.22086E+15 | 9.18857E+11 | 2.9365E+15  | squalene-hopene cyclase activity                                           | Catalysis of the reaction: squalene = hop-22(29)-ene.                                                                                                                                                                                 |
| GO:0051060 | 1 | 12 | 60795 | 1819  | 46176758 | 1.97385E+12 | 39390559826 | 2.32509E+15  | 8077419672  | 56528247163 | pullulanase activity                                                       | Catalysis of the hydrolysis of (1,6)-alpha-D-glucosidic linkages in pullulan (a linear polymer of alpha-(1,6)-linked maltotriose units) and in amylopectin and glycogen, and the a- and b-limit dextrans of amylopectin and glycogen. |
| GO:0051073 | 3 | 33 | 26855 | 23864 | 46154713 | 1.22882E+16 | 5.16776E+11 | 1.24966E+15  | 8856700904  | 61018831094 | adenosylcobinamide-GDP ribazoletransferase activity                        | Catalysis of the reaction: adenosylcobinamide-GDP + alpha-                                                                                                                                                                            |

|            |   |    |       |       |          |             |             |             |             |             |                                                                |                                                                                                                                                                                  |
|------------|---|----|-------|-------|----------|-------------|-------------|-------------|-------------|-------------|----------------------------------------------------------------|----------------------------------------------------------------------------------------------------------------------------------------------------------------------------------|
| GO:0051116 | 3 | 49 | 26855 | 24893 | 46153684 | 1.82461E+16 | 5.39059E+11 | 1.75907E+16 | 848.5439219 | 3649.622764 | cobaltochelatase activity                                      | ribazole = GMP + adenosylcobalamin.<br>Catalysis of the reaction: ATP + Co(2+) + H(2)O + hydrogenobyrrinate a,c-diamide = ADP + cob(II)yrinate a,c diamide + 4 H(+) + phosphate. |
| GO:0051116 | 2 | 29 | 22861 | 24893 | 46153684 | 1.26854E+16 | 5.39059E+11 | 1.23465E+16 | 35592059458 | 1.92608E+12 | cobaltochelatase activity                                      | Catalysis of the reaction: ATP + Co(2+) + H(2)O + hydrogenobyrrinate a,c-diamide = ADP + cob(II)yrinate a,c diamide + 4 H(+) + phosphate.                                        |
| GO:0051669 | 1 | 22 | 60795 | 5810  | 46172767 | 3.61872E+12 | 1.25816E+12 | 1.52416E+16 | 1.69817E+11 | 1.04653E+11 | fructan beta-fructosidase activity                             | Catalysis of the hydrolysis of terminal, non-reducing 2,1- and 2,6-linked beta-D-fructofuranose residues in fructans.                                                            |
| GO:0051903 | 3 | 34 | 26855 | 24739 | 46153838 | 1.26606E+16 | 5.35725E+11 | 1.24078E+16 | 7426421305  | 52149138722 | S-(hydroxymethyl)glutathione dehydrogenase activity            | Catalysis of the reaction: S-(hydroxymethyl)glutathione + NAD(P)+ = S-formylglutathione + NAD(P)H + H+.                                                                          |
| GO:0051907 | 1 | 7  | 60795 | 395   | 46178182 | 1.15141E+12 | 8553749935  | 3.7507E+15  | 12384486917 | 1.1543E+11  | S-(hydroxymethyl)glutathione synthase activity                 | Catalysis of the reaction: S-(hydroxymethyl)glutathione = formaldehyde + glutathione.                                                                                            |
| GO:0051907 | 3 | 2  | 26855 | 395   | 46178182 | 74474027183 | 8553749935  | 3.12211E+16 | 2.26293E+16 | 4.26651E+15 | S-(hydroxymethyl)glutathione synthase activity                 | Catalysis of the reaction: S-(hydroxymethyl)glutathione = formaldehyde + glutathione.                                                                                            |
| GO:0051921 | 1 | 52 | 60795 | 19031 | 46159546 | 8.55333E+11 | 4.12118E+12 | 1.05343E+16 | 16432625289 | 1.48812E+11 | adenosylcobyric acid synthase (glutamine-hydrolyzing) activity | Catalysis of the reaction: 4 L-glutamine + adenosylcob(III)yrinate a,c-diamide + 4 ATP + 4 H(2)O = 4 L-glutamate + adenosylcobyrate + 4 ADP + 8 H(+) + 4 phosphate.              |
| GO:0051921 | 3 | 31 | 26855 | 19031 | 46159546 | 1.15435E+16 | 4.12118E+12 | 1.48595E+16 | 656535129.2 | 6595702064  | adenosylcobyric acid synthase (glutamine-hydrolyzing) activity | Catalysis of the reaction: 4 L-glutamine + adenosylcob(III)yrinate a,c-diamide + 4 ATP + 4 H(2)O = 4 L-glutamate + adenosylcobyrate + 4 ADP + 8 H(+) + 4 phosphate.              |
| GO:0052587 | 1 | 13 | 60795 | 2082  | 46176495 | 2.13833E+11 | 45085841428 | 2.24574E+16 | 6174988745  | 4.51266E+11 | diacetyl reductase ((R)-acetoin forming) activity              | Catalysis of the reaction: (R)-acetoin + NAD(+) = diacetyl + H(+) + NADH.                                                                                                        |
| GO:0052587 | 2 | 5  | 22861 | 2082  | 46176495 | 2.18713E+12 | 45085841428 | 2.27829E+16 | 4.13914E+15 | 1.05172E+15 | diacetyl reductase ((R)-acetoin forming) activity              | Catalysis of the reaction: (R)-acetoin + NAD(+) = diacetyl + H(+) + NADH.                                                                                                        |
| GO:0052588 | 1 | 20 | 60795 | 2500  | 46176077 | 3.28974E+12 | 5.41377E+11 | 2.60327E+16 | 3811773.868 | 9653525.013 | diacetyl reductase ((S)-acetoin forming) activity              | Catalysis of the reaction: (S)-acetoin + NAD(+) = diacetyl + H(+) + NADH.                                                                                                        |
| GO:0052589 | 2 | 11 | 22861 | 5973  | 46172604 | 4.81169E+11 | 1.29346E+11 | 1.89531E+16 | 2.57576E+12 | 9.95815E+11 | malate dehydrogenase (menaquinone) activity                    | Catalysis of the reaction: (S)-malate + a menaquinone = oxaloacetate + a menaquinol.                                                                                             |
| GO:0052589 | 1 | 26 | 60795 | 5973  | 46172604 | 4.27667E+11 | 1.29346E+11 | 1.72526E+16 | 2510350180  | 2927419073  | malate dehydrogenase (menaquinone) activity                    | Catalysis of the reaction: (S)-malate + a menaquinone = oxaloacetate + a menaquinol.                                                                                             |
| GO:0052589 | 3 | 10 | 26855 | 5973  | 46172604 | 3.7237E+11  | 1.29346E+11 | 1.52551E+16 | 3.13287E+16 | 8.30805E+15 | malate dehydrogenase (menaquinone) activity                    | Catalysis of the reaction: (S)-malate + a menaquinone = oxaloacetate + a menaquinol.                                                                                             |
| GO:0052601 | 2 | 3  | 22861 | 1132  | 46177445 | 1.31228E+11 | 2.45135E+11 | 2.42042E+15 | 1.93509E+16 | 3.77599E+15 | (S)-limonene 1,2-monooxygenase activity                        | Catalysis of the reaction: (4S)-limonene + NAD(P)H + H+ + O2 = NAD(P)+ + H2O + (4S)-limonene-1,2-epoxide.                                                                        |
| GO:0052618 | 2 | 10 | 22861 | 7997  | 46170580 | 4.37426E+11 | 1.73176E+12 | 1.3368E+16  | 7.58194E+15 | 1.75974E+16 | coenzyme F420-0:L-glutamate ligase activity                    | Catalysis of the reaction: GTP + L-glutamate + factor F420-0 = GDP + H+ + factor gamma-F420-1 + phosphate.                                                                       |
| GO:0052619 | 2 | 10 | 22861 | 7997  | 46170580 | 4.37426E+11 | 1.73176E+12 | 1.3368E+16  | 7.58194E+15 | 1.75974E+16 | coenzyme F420-1:gamma-L-glutamate ligase activity              | Catalysis of the reaction: GTP + L-glutamate + factor gamma-F420-1 = GDP + H+ + factor gamma-F420-2 + phosphate.                                                                 |



|            |   |    |       |       |          |             |             |              |             |             |                                                        |                                                                                                                                                                                                                                                        |
|------------|---|----|-------|-------|----------|-------------|-------------|--------------|-------------|-------------|--------------------------------------------------------|--------------------------------------------------------------------------------------------------------------------------------------------------------------------------------------------------------------------------------------------------------|
| GO:0052621 | 3 | 17 | 26855 | 11028 | 46167549 | 6.33029E+11 | 2.38812E+12 | 1.4064E+16   | 3.68343E+12 | 1.32829E+16 | diguanylate cyclase activity                           | Catalysis of the reaction: 2 GTP = cyclic di-3',5'-guanylate + 2 diphosphate + 2 H(+).                                                                                                                                                                 |
| GO:0052630 | 1 | 1  | 60795 | 6099  | 46172478 | 16448721112 | 1.32074E+12 | -3.0053E+16  | 2.92783E+16 | 7.86022E+15 | UDP-N-acetylgalactosamine diphosphorylase activity     | Catalysis of the reaction: UTP + N-acetyl-alpha-D-galactosamine 1-phosphate = diphosphate + UDP-N-acetyl-D-galactosamine.                                                                                                                              |
| GO:0052737 | 2 | 12 | 22861 | 8743  | 46169834 | 5.24911E+11 | 1.8933E+12  | 1.47117E+16  | 1.74988E+16 | 5.08104E+15 | pyruvate dehydrogenase (quinone) activity              | Catalysis of the reaction: a ubiquinone + H2O + pyruvate = a ubiquinol + acetate + CO2.                                                                                                                                                                |
| GO:0052739 | 1 | 17 | 60795 | 2886  | 46175691 | 2.79628E+11 | 62496512181 | 2.16166E+16  | 552827871.8 | 56084183851 | phosphatidylserine 1-acylhydrolase activity            | Catalysis of the reaction: phosphatidylserine + H2O = 2-acyl-sn-glycero-3-phosphoserine + fatty acid.                                                                                                                                                  |
| GO:0052739 | 3 | 8  | 26855 | 2886  | 46175691 | 2.97896E+11 | 62496512181 | 2.25296E+15  | 3.54217E+12 | 1.28662E+16 | phosphatidylserine 1-acylhydrolase activity            | Catalysis of the reaction: phosphatidylserine + H2O = 2-acyl-sn-glycero-3-phosphoserine + fatty acid.                                                                                                                                                  |
| GO:0052740 | 1 | 17 | 60795 | 2886  | 46175691 | 2.79628E+11 | 62496512181 | 2.16166E+16  | 552827871.8 | 56084183851 | 1-acyl-2-lysophosphatidylserine acylhydrolase activity | Catalysis of the reaction: 1-acyl-2-lysophosphatidylserine + H2O = sn-glycerol-phosphoserine + a carboxylate.                                                                                                                                          |
| GO:0052740 | 3 | 8  | 26855 | 2886  | 46175691 | 2.97896E+11 | 62496512181 | 2.25296E+15  | 3.54217E+12 | 1.28662E+16 | 1-acyl-2-lysophosphatidylserine acylhydrolase activity | Catalysis of the reaction: 1-acyl-2-lysophosphatidylserine + H2O = sn-glycerol-phosphoserine + a carboxylate.                                                                                                                                          |
| GO:0052851 | 1 | 5  | 60795 | 344   | 46178233 | 82243605560 | 7449341715  | 3.46472E+16  | 1.06482E+12 | 4.78417E+12 | ferric-chelate reductase (NADPH) activity              | Catalysis of the reaction: 2 Fe3+ + NADPH = 2 Fe2+ + H+ + NADP+.                                                                                                                                                                                       |
| GO:0052856 | 3 | 12 | 26855 | 42236 | 46136341 | 4.46844E+12 | 9.14623E+11 | -1.03341E+16 | 3.97286E+15 | 1.01509E+16 | NADHX epimerase activity                               | Catalysis of the reaction: (R)-NADHX = (S)-NADHX.                                                                                                                                                                                                      |
| GO:0052857 | 3 | 12 | 26855 | 42236 | 46136341 | 4.46844E+12 | 9.14623E+11 | -1.03341E+16 | 3.97286E+15 | 1.01509E+16 | NADPHX epimerase activity                              | Catalysis of the reaction: (R)-NADPHX = (S)-NADPHX.                                                                                                                                                                                                    |
| GO:0052869 | 1 | 25 | 60795 | 3711  | 46174866 | 4.11218E+11 | 80361939260 | 2.35532E+16  | 94596.02271 | 25528560.64 | arachidonic acid omega-hydroxylase activity            | Catalysis of the reaction: arachidonic acid + O2 + NADPH + H+ = 20-HETE + NADP+ + H2O. Arachidonic acid is also known as (5Z,8Z,11Z,14Z)-icosatetraenoic acid, and 20-HETE is also known as (5Z,8Z,11Z,14Z)-20-hydroxyicosa-5,8,11,14-tetraenoic acid. |
| GO:0052869 | 2 | 9  | 22861 | 3711  | 46174866 | 3.93684E+12 | 80361939260 | 2.29245E+16  | 1.26735E+12 | 5.47372E+11 | arachidonic acid omega-hydroxylase activity            | Catalysis of the reaction: arachidonic acid + O2 + NADPH + H+ = 20-HETE + NADP+ + H2O. Arachidonic acid is also known as (5Z,8Z,11Z,14Z)-icosatetraenoic acid, and 20-HETE is also known as (5Z,8Z,11Z,14Z)-20-hydroxyicosa-5,8,11,14-tetraenoic acid. |
| GO:0052873 | 2 | 16 | 22861 | 11543 | 46167034 | 6.99882E+11 | 2.49964E+11 | 1.48539E+16  | 3.01181E+11 | 1.13155E+15 | FMN reductase (NADPH) activity                         | Catalysis of the reaction: FMNH2 + NADP+ = FMN + NADPH + 2 H+.                                                                                                                                                                                         |
| GO:0052874 | 3 | 5  | 26855 | 639   | 46177938 | 1.86185E+11 | 1.38376E+11 | 3.75007E+16  | 42798025311 | 2.24826E+12 | FMN reductase (NADH) activity                          | Catalysis of the reaction: FMNH2 + NAD+ = FMN + NADH + 2 H+.                                                                                                                                                                                           |
| GO:0052875 | 1 | 9  | 60795 | 734   | 46177843 | 1.48038E+12 | 15894816334 | 3.21934E+16  | 81876263.5  | 8068427016  | riboflavin reductase (NADH) activity                   | Catalysis of the reaction: reduced riboflavin + NAD+ = riboflavin + NADH + 2 H+.                                                                                                                                                                       |
| GO:0052876 | 3 | 14 | 26855 | 1852  | 46176725 | 5.21318E+11 | 4.01052E+11 | 3.7003E+14   | 113690.8637 | 3982716.404 | methylamine dehydrogenase (amicyanin) activity         | Catalysis of the reaction: methylamine + H2O + amicyanin = formaldehyde + ammonia + reduced amicyanin.                                                                                                                                                 |

|            |   |    |       |       |          |             |             |              |             |             |                                                            |                                                                                                                                                                    |
|------------|---|----|-------|-------|----------|-------------|-------------|--------------|-------------|-------------|------------------------------------------------------------|--------------------------------------------------------------------------------------------------------------------------------------------------------------------|
| GO:0052907 | 1 | 22 | 60795 | 2704  | 46175873 | 3.61872E+12 | 58555290692 | 2.62761E+16  | 380066.0893 | 11538918.25 | 23S rRNA (adenine(1618)-N(6))-methyltransferase activity   | Catalysis of the reaction: S-adenosyl-L-methionine + adenine(1618) in 23S rRNA = S-adenosyl-L-homocysteine + rRNA containing N(6)-methyladenine(1618) in 23S rRNA. |
| GO:0052907 | 3 | 7  | 26855 | 2704  | 46175873 | 2.60659E+12 | 58555290692 | 2.15429E+15  | 1.20504E+16 | 3.72407E+16 | 23S rRNA (adenine(1618)-N(6))-methyltransferase activity   | Catalysis of the reaction: S-adenosyl-L-methionine + adenine(1618) in 23S rRNA = S-adenosyl-L-homocysteine + rRNA containing N(6)-methyladenine(1618) in 23S rRNA. |
| GO:0052911 | 2 | 7  | 22861 | 4921  | 46173656 | 3.06198E+12 | 1.06565E+12 | 1.52274E+15  | 1.24617E+16 | 2.62656E+16 | 23S rRNA (guanine(745)-N(1))-methyltransferase activity    | Catalysis of the reaction: S-adenosyl-L-methionine + guanine(745) in 23S rRNA = N(1)-methylguanine(745) in 23S rRNA + S-adenosyl-L-homocysteine.                   |
| GO:0052911 | 1 | 24 | 60795 | 4921  | 46173656 | 3.94769E+11 | 1.06565E+12 | 1.88928E+15  | 9625987.576 | 12988791732 | 23S rRNA (guanine(745)-N(1))-methyltransferase activity    | Catalysis of the reaction: S-adenosyl-L-methionine + guanine(745) in 23S rRNA = N(1)-methylguanine(745) in 23S rRNA + S-adenosyl-L-homocysteine.                   |
| GO:0052914 | 1 | 64 | 60795 | 8364  | 46170213 | 1.05272E+16 | 1.81123E+12 | 2.53908E+14  | 6.17532E-12 | 2.19759E-09 | 16S rRNA (guanine(1207)-N(2))-methyltransferase activity   | Catalysis of the reaction: S-adenosyl-L-methionine + guanosine(1207) in 16S rRNA = N(2)-methylguanosine(1207) in 16S rRNA + S-adenosyl-L-homocysteine.             |
| GO:0052914 | 2 | 11 | 22861 | 8364  | 46170213 | 4.81169E+11 | 1.81123E+12 | 1.40957E+16  | 3.65389E+16 | 9.44704E+15 | 16S rRNA (guanine(1207)-N(2))-methyltransferase activity   | Catalysis of the reaction: S-adenosyl-L-methionine + guanosine(1207) in 16S rRNA = N(2)-methylguanosine(1207) in 16S rRNA + S-adenosyl-L-homocysteine.             |
| GO:0052915 | 1 | 17 | 60795 | 4804  | 46173773 | 2.79628E+11 | 1.04031E+12 | 1.4265E+16   | 3.13707E+12 | 1.16904E+16 | 23S rRNA (guanine(2445)-N(2))-methyltransferase activity   | Catalysis of the reaction: S-adenosyl-L-methionine + guanosine(2445) in 23S rRNA = N(2)-methylguanosine(2445) in 23S rRNA + S-adenosyl-L-homocysteine.             |
| GO:0052916 | 1 | 7  | 60795 | 578   | 46177999 | 1.15141E+12 | 12516626487 | 3.20148E+16  | 1.46832E+11 | 93849424935 | 23S rRNA (guanine(1835)-N(2))-methyltransferase activity   | Catalysis of the reaction: S-adenosyl-L-methionine + guanosine(1835) in 23S rRNA = N(2)-methylguanosine(1835) in 23S rRNA + S-adenosyl-L-homocysteine.             |
| GO:0052927 | 2 | 6  | 22861 | 27142 | 46151435 | 2.62456E+11 | 5.87762E+11 | -1.16316E+16 | 1.99467E+16 | 3.86304E+15 | CTP:tRNA cytidyltransferase activity                       | Catalysis of the reaction: a tRNA precursor + CTP = a tRNA with a 3' cytidine end + diphosphate.                                                                   |
| GO:0052928 | 2 | 6  | 22861 | 27142 | 46151435 | 2.62456E+11 | 5.87762E+11 | -1.16316E+16 | 1.99467E+16 | 3.86304E+15 | CTP:3'-cytidine-tRNA cytidyltransferase activity           | Catalysis of the reaction: a tRNA with a 3' cytidine + CTP = a tRNA with a 3' CC end + diphosphate.                                                                |
| GO:0052929 | 2 | 6  | 22861 | 27142 | 46151435 | 2.62456E+11 | 5.87762E+11 | -1.16316E+16 | 1.99467E+16 | 3.86304E+15 | ATP:3'-cytidine-cytidine-tRNA adenylyltransferase activity | Catalysis of the reaction: a tRNA with a 3' CC end + ATP = a tRNA with a 3' CCA end + diphosphate.                                                                 |
| GO:0052930 | 3 | 8  | 26855 | 1907  | 46176670 | 2.97896E+11 | 41296205381 | 2.85073E+16  | 21065190556 | 1.25148E+12 | methanol ferricytochrome-c oxidoreductase activity         | Catalysis of the reaction: methanol + 2 ferricytochrome c = formaldehyde + 2 ferrocyclochrome c + 2 H+.                                                            |
| GO:0052931 | 3 | 8  | 26855 | 1907  | 46176670 | 2.97896E+11 | 41296205381 | 2.85073E+16  | 21065190556 | 1.25148E+12 | ethanol cytochrome-c oxidoreductase activity               | Catalysis of the reaction: ethanol + 2 cytochrome c(L) = acetaldehyde + 2 reduced cytochrome c(L) + 2 H+.                                                          |
| GO:0052932 | 3 | 8  | 26855 | 1907  | 46176670 | 2.97896E+11 | 41296205381 | 2.85073E+16  | 21065190556 | 1.25148E+12 | 2-chloroethanol cytochrome-c oxidoreductase activity       | Catalysis of the reaction: 2-chloroethanol + 2 cytochrome c(L) = chloroacetaldehyde + 2 reduced cytochrome c(L).                                                   |
| GO:0052933 | 3 | 8  | 26855 | 1907  | 46176670 | 2.97896E+11 | 41296205381 | 2.85073E+16  | 21065190556 | 1.25148E+12 | alcohol dehydrogenase (cytochrome c(L)) activity           | Catalysis of the reaction: primary alcohol + 2 cytochrome c(L) = 2                                                                                                 |

|            |   |    |       |       |          |             |             |             |             |             |                                                                                      |                                                                                                                                                                         |
|------------|---|----|-------|-------|----------|-------------|-------------|-------------|-------------|-------------|--------------------------------------------------------------------------------------|-------------------------------------------------------------------------------------------------------------------------------------------------------------------------|
| GO:0052934 | 3 | 19 | 26855 | 7236  | 46171341 | 7.07503E+11 | 1.56696E+12 | 2.17477E+15 | 1092015295  | 14544939205 | alcohol dehydrogenase (cytochrome c) activity                                        | reduced cytochrome c(L) + an aldehyde + 2 H+.                                                                                                                           |
| GO:0052935 | 3 | 19 | 26855 | 7236  | 46171341 | 7.07503E+11 | 1.56696E+12 | 2.17477E+15 | 1092015295  | 14544939205 | ethanol:cytochrome c oxidoreductase activity                                         | Catalysis of the reaction: primary alcohol + 2 cytochrome c = 2 reduced cytochrome c + an aldehyde + 2 H+.                                                              |
| GO:0061596 | 1 | 4  | 60795 | 277   | 46178300 | 6579488445  | 59984524859 | 3.45531E+15 | 5.41701E+11 | 1.8485E+16  | 3-sulfolactaldehyde reductase activity                                               | Catalysis of the reaction: 2,3-dihydroxypropane-1-sulfonate + NAD+ = 3-sulfolactaldehyde + NADH + H+.                                                                   |
| GO:0061598 | 3 | 25 | 26855 | 12617 | 46165960 | 93092533979 | 2.73222E+12 | 1.76859E+16 | 2485127606  | 29150829225 | molybdopterin adenylyltransferase activity                                           | Catalysis of the reaction ATP + molybdopterin = diphosphate + adenylyl-molybdopterin.                                                                                   |
| GO:0061634 | 1 | 22 | 60795 | 7894  | 46170683 | 3.61872E+12 | 1.70945E+12 | 1.08195E+16 | 1.12284E+15 | 3.50166E+16 | alpha-D-xyloside xylohydrolase                                                       | Catalysis of the hydrolysis of terminal, non-reducing alpha-D-xylose residues with release of alpha-D-xylose.                                                           |
| GO:0061693 | 3 | 62 | 26855 | 17010 | 46161567 | 2.30869E+16 | 3.68353E+11 | 2.64792E+16 | 8.55186E-14 | 3.53106E-11 | alpha-D-ribose 1-methylphosphonate 5-triphosphate synthase activity                  | Catalysis of the reaction: ATP + methylphosphonate = alpha-D-ribose 1-methylphosphonate 5-triphosphate + adenine.                                                       |
| GO:0062192 | 2 | 17 | 22861 | 10602 | 46167975 | 7436245134  | 2.29587E+11 | 1.69553E+16 | 3.56853E+11 | 1.9286E+12  | L-rhamnose mutarotase activity                                                       | Catalysis of the reaction: alpha-L-rhamnose = beta-L-rhamnose.                                                                                                          |
| GO:0062192 | 3 | 17 | 26855 | 10602 | 46167975 | 6.33029E+11 | 2.29587E+11 | 1.46323E+16 | 2.3672E+12  | 9.2471E+11  | L-rhamnose mutarotase activity                                                       | Catalysis of the reaction: alpha-L-rhamnose = beta-L-rhamnose.                                                                                                          |
| GO:0062192 | 1 | 35 | 60795 | 10602 | 46167975 | 5.75705E+11 | 2.29587E+11 | 1.32629E+16 | 15516445272 | 1.41742E+11 | L-rhamnose mutarotase activity                                                       | Catalysis of the reaction: alpha-L-rhamnose = beta-L-rhamnose.                                                                                                          |
| GO:0062193 | 1 | 18 | 60795 | 2700  | 46175877 | 2.96077E+12 | 5.84687E+11 | 2.34024E+16 | 43290807.9  | 642977503   | D-ribose pyranase activity                                                           | Catalysis of the reaction: beta-D-ribose = beta-D-ribofuranose.                                                                                                         |
| GO:0070204 | 2 | 19 | 22861 | 14029 | 46164548 | 8.3111E+11  | 3.03799E+12 | 1.45192E+16 | 1.16728E+12 | 5.1376E+11  | 2-succinyl-5-enolpyruvyl-6-hydroxy-3-cyclohexene-1-carboxylic-acid synthase activity | Catalysis of the reaction: 2-oxoglutarate + H(+) + isochorismate = 5-enolpyruvoyl-6-hydroxy-2-succinyl-cyclohex-3-ene-1-carboxylate + CO(2).                            |
| GO:0070204 | 1 | 38 | 60795 | 14029 | 46164548 | 6.25051E+11 | 3.03799E+12 | 1.04086E+16 | 44587323281 | 2.33335E+12 | 2-succinyl-5-enolpyruvyl-6-hydroxy-3-cyclohexene-1-carboxylic-acid synthase activity | Catalysis of the reaction: 2-oxoglutarate + H(+) + isochorismate = 5-enolpyruvoyl-6-hydroxy-2-succinyl-cyclohex-3-ene-1-carboxylate + CO(2).                            |
| GO:0070205 | 1 | 19 | 60795 | 5805  | 46172772 | 3.12526E+11 | 1.25708E+11 | 1.3139E+15  | 3.75249E+12 | 1.34965E+16 | 2-succinyl-6-hydroxy-2,4-cyclohexadiene-1-carboxylate synthase activity              | Catalysis of the reaction: 5-enolpyruvoyl-6-hydroxy-2-succinyl-cyclohex-3-ene-1-carboxylate = (1R,6R)-2-succinyl-6-hydroxycyclohexa-2,4-diene-1-carboxylate + pyruvate. |
| GO:0070330 | 3 | 4  | 26855 | 1815  | 46176762 | 1.48948E+12 | 3.93039E+11 | 1.92206E+15 | 2.25409E+15 | 4.25629E+15 | aromatase activity                                                                   | Catalysis of the reduction of an aliphatic ring to yield an aromatic ring.                                                                                              |
| GO:0071111 | 1 | 5  | 60795 | 746   | 46177831 | 82243605560 | 1.61547E+11 | 2.34795E+16 | 3.36395E+16 | 8.83573E+15 | cyclic-guanylate-specific phosphodiesterase activity                                 | Catalysis of the reaction: cyclic di-3',5'-guanylate + H(2)O = 5'-phosphoguanlyl(3'->5')guanosine + H(+).                                                               |
| GO:0071160 | 3 | 12 | 26855 | 8907  | 46169670 | 4.46844E+12 | 1.92882E+12 | 1.21206E+16 | 7.0805E+14  | 1.66394E+16 | cyanophycin synthetase activity (L-aspartate-adding)                                 | Catalysis of the reaction: ATP + [L-Asp(4-L-Arg)]n + L-Asp = ADP + phosphate + [L-Asp(4-L-Arg)]n-L-Asp.                                                                 |
| GO:0071161 | 3 | 12 | 26855 | 8907  | 46169670 | 4.46844E+12 | 1.92882E+12 | 1.21206E+16 | 7.0805E+14  | 1.66394E+16 | cyanophycin synthetase activity (L-arginine-adding)                                  | Catalysis of the reaction: ATP + [L-Asp(4-L-Arg)]n-L-Asp + L-arginine = ADP + phosphate + [L-Asp(4-L-Arg)]n+1.                                                          |

|            |   |     |       |       |          |             |             |              |             |             |                                                                   |                                                                                                                                                                                                  |
|------------|---|-----|-------|-------|----------|-------------|-------------|--------------|-------------|-------------|-------------------------------------------------------------------|--------------------------------------------------------------------------------------------------------------------------------------------------------------------------------------------------|
| GO:0071522 | 1 | 13  | 60795 | 2573  | 46176004 | 2.13833E+11 | 55718477423 | 1.94026E+16  | 5.4067E+11  | 2.74929E+11 | ureidoglycine aminohydrolase activity                             | Catalysis of the reaction: ureidoglycine + H2O = S-ureidoglycolate + NH3.                                                                                                                        |
| GO:0080061 | 3 | 18  | 26855 | 9106  | 46169471 | 6.70266E+11 | 1.97191E+12 | 1.76514E+16  | 1.14357E+11 | 75791380398 | indole-3-acetonitrile nitrilase activity                          | Catalysis of the reaction: indole-3-acetonitrile + 2 H2O = indole-3-acetic acid + NH3.                                                                                                           |
| GO:0080061 | 1 | 3   | 60795 | 9106  | 46169471 | 49346163336 | 1.97191E+12 | -1.99858E+15 | 2.30059E+15 | 6.42215E+15 | indole-3-acetonitrile nitrilase activity                          | Catalysis of the reaction: indole-3-acetonitrile + 2 H2O = indole-3-acetic acid + NH3.                                                                                                           |
| GO:0080101 | 3 | 18  | 26855 | 6644  | 46171933 | 6.70266E+11 | 1.43876E+12 | 2.21991E+16  | 1484472251  | 18687152205 | phosphatidyl-N-dimethylethanolamine N-methyltransferase activity  | Catalysis of the reaction: S-adenosyl-L-methionine + phosphatidyl-N-dimethylethanolamine = S-adenosyl-L-homocysteine + phosphatidylcholine.                                                      |
| GO:0080109 | 3 | 8   | 26855 | 5188  | 46173389 | 2.97896E+11 | 1.12346E+12 | 1.40685E+16  | 1.22469E+16 | 2.59054E+16 | indole-3-acetonitrile nitrile hydratase activity                  | Catalysis of the reaction: indole-3-acetonitrile + H2O = indole-3-acetamide.                                                                                                                     |
| GO:0080109 | 2 | 8   | 22861 | 5188  | 46173389 | 3.49941E+16 | 1.12346E+12 | 1.63916E+16  | 4.95401E+15 | 1.22193E+16 | indole-3-acetonitrile nitrile hydratase activity                  | Catalysis of the reaction: indole-3-acetonitrile + H2O = indole-3-acetamide.                                                                                                                     |
| GO:0080130 | 1 | 29  | 60795 | 8946  | 46169631 | 4.77013E+12 | 1.93726E+12 | 1.30001E+16  | 15933300633 | 1.00748E+12 | L-phenylalanine:2-oxoglutarate aminotransferase activity          | Catalysis of the reaction: L-phenylalanine + 2-oxoglutarate = phenylpyruvate + L-glutamate.                                                                                                      |
| GO:0080130 | 3 | 21  | 26855 | 8946  | 46169631 | 7.81977E+11 | 1.93726E+12 | 2.01311E+16  | 1515191683  | 18900986278 | L-phenylalanine:2-oxoglutarate aminotransferase activity          | Catalysis of the reaction: L-phenylalanine + 2-oxoglutarate = phenylpyruvate + L-glutamate.                                                                                                      |
| GO:0080130 | 2 | 11  | 22861 | 8946  | 46169631 | 4.81169E+11 | 1.93726E+12 | 1.31252E+16  | 5.93961E+13 | 1.4242E+16  | L-phenylalanine:2-oxoglutarate aminotransferase activity          | Catalysis of the reaction: L-phenylalanine + 2-oxoglutarate = phenylpyruvate + L-glutamate.                                                                                                      |
| GO:0080146 | 2 | 1   | 22861 | 11852 | 46166725 | 4.37426E+11 | 2.56656E+12 | -2.55272E+15 | 1.94058E+15 | 3.77776E+15 | L-cysteine desulfhydrase activity                                 | Catalysis of the reaction: L-cysteine + H2O = ammonia + pyruvate + hydrogen sulfide + H+.                                                                                                        |
| GO:0090599 | 1 | 107 | 60795 | 35681 | 46142896 | 1.76001E+16 | 7.72674E+11 | 1.18765E+16  | 40.8196145  | 2247.255844 | alpha-glucosidase activity                                        | Catalysis of the hydrolysis of terminal, non-reducing alpha-linked alpha-D-glucose residue with release of alpha-D-glucose.                                                                      |
| GO:0090614 | 1 | 6   | 60795 | 12330 | 46166247 | 98692326672 | 2.67007E+12 | -1.43587E+16 | 3.41996E+16 | 8.96004E+15 | 5'-methylthioadenosine deaminase activity                         | Catalysis of the reaction: 5'methyl thioadenosine + H2O = 5'methyl thioinosine + NH3.                                                                                                            |
| GO:0097266 | 2 | 22  | 22861 | 13905 | 46164672 | 96233760553 | 3.01114E+11 | 1.67623E+16  | 3449246479  | 2.73883E+11 | phenylacetyl-CoA 1,2-epoxidase activity                           | Catalysis of the reaction: phenylacetyl-CoA + H(+) + NADPH + O2 = 2-(1,2-epoxy-1,2-dihydrophenyl)acetyl-CoA + H2O + NADP(+).                                                                     |
| GO:0097266 | 3 | 25  | 26855 | 13905 | 46164672 | 93092533979 | 3.01114E+11 | 1.62836E+16  | 1391762529  | 1.28559E+11 | phenylacetyl-CoA 1,2-epoxidase activity                           | Catalysis of the reaction: phenylacetyl-CoA + H(+) + NADPH + O2 = 2-(1,2-epoxy-1,2-dihydrophenyl)acetyl-CoA + H2O + NADP(+).                                                                     |
| GO:0098848 | 3 | 14  | 26855 | 4223  | 46174354 | 5.21318E+11 | 91449331581 | 2.51112E+16  | 335109795.7 | 36799690069 | alpha-D-ribose 1-methylphosphonate 5-phosphate C-P-lyase activity | Catalysis of the reaction: alpha-D-ribose 1-methylphosphonate 5-phosphate = alpha-D-ribose 1,2-cyclic phosphate 5-phosphate + methane.                                                           |
| GO:0102031 | 1 | 5   | 60795 | 438   | 46178139 | 82243605560 | 9484917649  | 3.1162E+15   | 3.2385E+12  | 1.19926E+16 | 4-acetamido-4,6-dideoxy-D-galactose transferase activity          | Catalysis of the reaction: dTDP-4-acetamido-4,6-dideoxy-alpha-D-galactose + beta-D-ManNAcA-(1->4)-alpha-D-GlcNAc-1-diphosphoditrans,polycis-undecaprenol <=> H+ + alpha-D-FucNAc4-(1->4)-beta-D- |

|            |   |    |       |       |          |             |             |             |             |             |                                                                                                            |                                                                                                                                                                                                                                                      |
|------------|---|----|-------|-------|----------|-------------|-------------|-------------|-------------|-------------|------------------------------------------------------------------------------------------------------------|------------------------------------------------------------------------------------------------------------------------------------------------------------------------------------------------------------------------------------------------------|
|            |   |    |       |       |          |             |             |             |             |             |                                                                                                            | ManNAcA-(1->4)-D-GlcNAc-undecaprenyl diphosphate + dTDP.                                                                                                                                                                                             |
| GO:0102041 | 1 | 30 | 60795 | 5456  | 46173121 | 4.93462E+11 | 1.1815E+12  | 2.06232E+16 | 172681.8272 | 4484297.262 | 7,8-dihydropterin-6-yl-methyl-4-(beta-D-ribofuranosyl)aminobenzene 5'-phosphate synthase                   | Catalysis of the reaction: 4-(beta-D-ribofuranosyl)aminobenzene 5'-phosphate + (2-amino-4-hydroxy-7,8-dihydropteridin-6-yl)methyl diphosphate = N-[(7,8-dihydropterin-6-yl)methyl]-4-(beta-D-ribofuranosyl)aniline 5'-phosphate + diphosphoric acid. |
| GO:0102096 | 2 | 4  | 22861 | 864   | 46177713 | 1.7497E+12  | 1.871E+11   | 3.22523E+16 | 9.87366E+11 | 3.12881E+16 | decaprenyl-N-acetyl-alpha-D-glucosaminyl-pyrophosphate:dTDP-alpha-L-rhamnose rhamnosyltransferase activity | Catalysis of the reaction: dTDP-6-deoxy-beta-L-mannose + N-acetyl-alpha-D-glucosaminyl-diphospho-trans,octacis-decaprenol <=> dTDP(3-) + alpha-L-Rhap-(1->3)-alpha-D-GlcpNAc-1-diphospho-trans,octacis-decaprenol + H+.                              |
| GO:0102099 | 1 | 5  | 60795 | 471   | 46178106 | 82243605560 | 1.01995E+11 | 3.0114E+15  | 4.50069E+12 | 1.58091E+16 | FAD-dependent urate hydroxylase activity                                                                   | Catalysis of the reaction: 7,9-dihydro-1H-purine-2,6,8(3H)-trione + NADH + H+ + O2 <=> 5-hydroxyisouric acid + NAD + H2O.                                                                                                                            |
| GO:0102121 | 1 | 4  | 60795 | 416   | 46178161 | 6579488445  | 9008506260  | 2.86862E+16 | 2.40306E+16 | 6.62808E+15 | ceramidase activity                                                                                        | Catalysis of the reaction: H2O + a ceramide = a sphingoid base + a fatty acid.                                                                                                                                                                       |
| GO:0102130 | 3 | 25 | 26855 | 12341 | 46166236 | 93092533979 | 2.67245E+12 | 1.8005E+15  | 166368815.5 | 20444548780 | malonyl-CoA methyltransferase activity                                                                     | Catalysis of the reaction: S-adenosyl-L-methionine + a malonyl-[acp] = S-adenosyl-L-homocysteine + a malonyl-[acp] methyl ester.                                                                                                                     |
| GO:0102210 | 1 | 7  | 60795 | 1291  | 46177286 | 1.15141E+12 | 2.79567E+11 | 2.04214E+16 | 1.85514E+16 | 5.35657E+15 | rhamnogalacturonan endolyase activity                                                                      | Catalysis of the reaction: H2O + a rhamnogalacturonan type I <=> [rhamnogalacturonan I oligosaccharide]-alpha-L-rhamnose + 4-deoxy-4,5-unsaturated D-galactopyranosyluronate-[rhamnogalacturonan I oligosaccharide].                                 |
| GO:0102211 | 1 | 25 | 60795 | 4193  | 46174384 | 4.11218E+11 | 90799679687 | 2.17914E+15 | 11042193.16 | 24123394.48 | unsaturated rhamnogalacturonyl hydrolase activity                                                          | Catalysis of the reaction: 2-O-(4-deoxy-beta-L-threo-hex-4-enopyranuronosyl)-alpha-L-rhamnopyranose(1-) + H2O <=> (4S,5S)-4,5-dihydroxy-2,6-dioxohexanoate + alpha-L-rhamnopyranose.                                                                 |
| GO:0102212 | 1 | 12 | 60795 | 1483  | 46177094 | 1.97385E+12 | 3211445862  | 2.61971E+15 | 10337278608 | 9903160875  | unsaturated chondroitin disaccharide hydrolase activity                                                    | Catalysis of the reaction: beta-D-4-deoxy-Delta(4)-GlcP-A-(1->3)-beta-D-GalpNAc6S + H2O = 5-dehydro-4-deoxy-D-glucuronate + N-acetyl-beta-D-galactosamine 6-sulfate.                                                                                 |
| GO:0102220 | 1 | 3  | 60795 | 38    | 46178539 | 49346163336 | 822892398.8 | 5.90609E+15 | 1.85951E+11 | 1.13077E+12 | hydrogenase activity (NAD+, ferredoxin)                                                                    | Catalysis of the reaction: 2 dihydrogen + NAD + 2 an oxidized ferredoxin = NADH + 3 H+ + 2 a reduced ferredoxin.                                                                                                                                     |
| GO:0102246 | 3 | 5  | 26855 | 422   | 46178155 | 1.86185E+11 | 9138436639  | 4.34865E+15 | 5919702843  | 4.36472E+11 | 6-amino-6-deoxyfutasine hydrolase activity                                                                 | Catalysis of the reaction: aminodeoxyfutasinate + H2O <=> dehypoxanthine futasine + adenine.                                                                                                                                                         |
| GO:0102317 | 1 | 8  | 60795 | 1168  | 46177409 | 1.3159E+11  | 2.52931E+11 | 2.37923E+15 | 1.9696E+12  | 7.91099E+11 | 4-methylaminobutyrate oxidase (demethylating) activity                                                     | Catalysis of the reaction: 4-(methylamino)butyric acid + O2 + H2O <=> gamma-aminobutyric acid                                                                                                                                                        |

|            |   |    |       |       |          |             |             |             |             |             |                                                                           |                                                                                                                                                                                               |
|------------|---|----|-------|-------|----------|-------------|-------------|-------------|-------------|-------------|---------------------------------------------------------------------------|-----------------------------------------------------------------------------------------------------------------------------------------------------------------------------------------------|
| GO:0102317 | 2 | 5  | 22861 | 1168  | 46177409 | 2.18713E+12 | 2.52931E+11 | 3.11222E+16 | 3.3151E+12  | 1.22324E+16 | 4-methylaminobutyrate oxidase (demethylating) activity                    | + formaldehyde + hydrogen peroxide.<br>Catalysis of the reaction: 4-(methylamino)butyric acid + O2 + H2O <=> gamma-aminobutyric acid + formaldehyde + hydrogen peroxide.                      |
| GO:0102334 | 3 | 1  | 26855 | 31    | 46178546 | 37237013592 | 671306956.9 | 5.79362E+15 | 1.78716E+15 | 3.54939E+14 | N,N'-diacetylbacillosaminyl-1-phosphate transferase activity              | Catalysis of the reaction: ditrans,polycis-undecaprenyl phosphate + UDP-N,N'-diacetylbacillosamine <=> N,N'-diacetyl-alpha-D-bacillosaminyl-diphospho-tri-trans,hepta-cis-undecaprenol + UMP. |
| GO:0102480 | 3 | 16 | 26855 | 10088 | 46168489 | 5.95792E+11 | 2.18456E+12 | 1.44746E+16 | 3.98855E+12 | 1.42463E+16 | 5-fluorocytosine deaminase activity                                       | Catalysis of the reaction: H+ + flucytosine + H2O <=> 5-fluorouracil + ammonium.                                                                                                              |
| GO:0102480 | 2 | 18 | 22861 | 10088 | 46168489 | 7.87367E+11 | 2.18456E+12 | 1.84969E+16 | 5271338638  | 39504867721 | 5-fluorocytosine deaminase activity                                       | Catalysis of the reaction: H+ + flucytosine + H2O <=> 5-fluorouracil + ammonium.                                                                                                              |
| GO:0102481 | 1 | 17 | 60795 | 4188  | 46174389 | 2.79628E+11 | 90691404371 | 1.62447E+14 | 64071069263 | 3.19504E+12 | 3D-(3,5/4)-trihydroxycyclohexane-1,2-dione hydrolase activity             | Catalysis of the reaction: 3D-3,5/4-trihydroxycyclohexane-1,2-dione + H2O <=> 5-deoxy-D-glucuronate + H+.                                                                                     |
| GO:0102481 | 3 | 8  | 26855 | 4188  | 46174389 | 2.97896E+11 | 90691404371 | 1.71577E+16 | 3.62843E+16 | 9.41658E+15 | 3D-(3,5/4)-trihydroxycyclohexane-1,2-dione hydrolase activity             | Catalysis of the reaction: 3D-3,5/4-trihydroxycyclohexane-1,2-dione + H2O <=> 5-deoxy-D-glucuronate + H+.                                                                                     |
| GO:0102482 | 1 | 17 | 60795 | 4364  | 46174213 | 2.79628E+11 | 9450269.548 | 1.56508E+16 | 1.04264E+12 | 4.72048E+12 | 5-deoxy-D-glucuronate isomerase activity                                  | Catalysis of the reaction: 5-deoxy-D-glucuronate = 5-dehydro-2-deoxy-D-gluconate.                                                                                                             |
| GO:0102482 | 3 | 8  | 26855 | 4364  | 46174213 | 2.97896E+11 | 9450269.548 | 1.65638E+15 | 4.62014E+16 | 1.15686E+15 | 5-deoxy-D-glucuronate isomerase activity                                  | Catalysis of the reaction: 5-deoxy-D-glucuronate = 5-dehydro-2-deoxy-D-gluconate.                                                                                                             |
| GO:0102483 | 2 | 79 | 22861 | 69158 | 46109419 | 3.45567E+15 | 1.49762E+16 | 1.20629E+16 | 416058.7406 | 12097933.38 | scopolin beta-glucosidase activity                                        | Catalysis of the reaction: H2O + scopolin <=> beta-D-glucose + scopoletin.                                                                                                                    |
| GO:0102545 | 3 | 40 | 26855 | 30686 | 46147891 | 1.48948E+16 | 6.64507E+11 | 1.16445E+15 | 4309506266  | 33197670467 | phosphatidyl phospholipase B activity                                     | Catalysis of the reaction: 2 H2O + a phosphatidylcholine = sn-glycero-3-phosphocholine + 2 H+ + 2 a carboxylate.                                                                              |
| GO:0102567 | 1 | 17 | 60795 | 2886  | 46175691 | 2.79628E+11 | 62496512181 | 2.16166E+16 | 552827871.8 | 56084183851 | phospholipase A2 activity (consuming 1,2-dipalmitoylphosphatidylcholine)  | Catalysis of the reaction: 1,2-dihexadecanoyl-sn-glycero-3-phosphocholine + H2O = 1-hexadecanoyl-sn-glycero-3-phosphocholine + hexadecanoate + H+.                                            |
| GO:0102567 | 3 | 8  | 26855 | 2886  | 46175691 | 2.97896E+11 | 62496512181 | 2.25296E+15 | 3.54217E+12 | 1.28662E+16 | phospholipase A2 activity (consuming 1,2-dipalmitoylphosphatidylcholine)  | Catalysis of the reaction: 1,2-dihexadecanoyl-sn-glycero-3-phosphocholine + H2O = 1-hexadecanoyl-sn-glycero-3-phosphocholine + hexadecanoate + H+.                                            |
| GO:0102568 | 1 | 17 | 60795 | 2886  | 46175691 | 2.79628E+11 | 62496512181 | 2.16166E+16 | 552827871.8 | 56084183851 | phospholipase A2 activity consuming 1,2-dioleoylphosphatidylethanolamine) | Catalysis of the reaction: 1-18:1-2-18:1-phosphatidylethanolamine + H2O = 1-oleoyl-sn-glycero-3-phosphoethanolamine + oleate + H+.                                                            |

|            |   |    |       |       |          |             |             |             |             |             |                                                                                                                                    |                                                                                                                                                                                                                                                                                                   |
|------------|---|----|-------|-------|----------|-------------|-------------|-------------|-------------|-------------|------------------------------------------------------------------------------------------------------------------------------------|---------------------------------------------------------------------------------------------------------------------------------------------------------------------------------------------------------------------------------------------------------------------------------------------------|
| GO:0102568 | 3 | 8  | 26855 | 2886  | 46175691 | 2.97896E+11 | 62496512181 | 2.25296E+15 | 3.54217E+12 | 1.28662E+16 | phospholipase A2 activity consuming 1,2-dioleoylphosphatidylethanolamine)                                                          | Catalysis of the reaction: 1-18:1-2-18:1-phosphatidylethanolamine + H2O = 1-oleoyl-sn-glycero-3-phosphoethanolamine + oleate + H+.                                                                                                                                                                |
| GO:0102638 | 1 | 30 | 60795 | 5456  | 46173121 | 4.93462E+11 | 1.1815E+12  | 2.06232E+16 | 172681.8272 | 4484297.262 | [1-(2-amino-7-methyl-4-oxo-7,8-dihydro-3H-pteridin-6-yl)]ethyl-4-(beta-D-ribofuranosyl)aminobenzene 5'-phosphate synthase activity | Catalysis of the reaction: 4-(beta-D-ribofuranosyl)aminobenzene 5'-phosphate + [1-(2-amino-7-methyl-4-oxo-7,8-dihydro-3H-pteridin-6-yl)]ethyl diphosphate = [1-(2-amino-7-methyl-4-oxo-7,8-dihydro-3H-pteridin-6-yl)]ethyl-4-(beta-D-ribofuranosyl)aminobenzene 5'-phosphate + diphosphoric acid. |
| GO:0102710 | 2 | 11 | 22861 | 5786  | 46172791 | 4.81169E+11 | 1.25296E+11 | 1.9412E+16  | 1.97172E+12 | 7.91181E+11 | D-inositol-3-phosphate glycosyltransferase activity                                                                                | Catalysis of the reaction: UDP-N-acetyl-alpha-D-glucosamine + 1D-myo-inositol 3-phosphate = 1D-myo-inositol 2-acetamido-2-deoxy-alpha-D-glucopyranoside 3-phosphate + UDP + H+.                                                                                                                   |
| GO:0102786 | 1 | 17 | 60795 | 4661  | 46173916 | 2.79628E+11 | 1.00934E+12 | 1.47009E+16 | 2.23039E+11 | 8.8043E+11  | stearoyl-[acp] desaturase activity                                                                                                 | Catalysis of the reaction: O2 + a stearoyl-[acp] + a reduced ferredoxin = 2 H2O + an oleoyl-[acp] + an oxidized ferredoxin.                                                                                                                                                                       |
| GO:0102786 | 2 | 7  | 22861 | 4661  | 46173916 | 3.06198E+12 | 1.00934E+12 | 1.60105E+14 | 9.49365E+15 | 2.09968E+16 | stearoyl-[acp] desaturase activity                                                                                                 | Catalysis of the reaction: O2 + a stearoyl-[acp] + a reduced ferredoxin = 2 H2O + an oleoyl-[acp] + an oxidized ferredoxin.                                                                                                                                                                       |
| GO:0102919 | 3 | 27 | 26855 | 6830  | 46171747 | 1.0054E+15  | 1.47904E+12 | 2.76503E+16 | 28.62825281 | 16886.57941 | 5,6-dimethylbenzimidazole synthase activity                                                                                        | Catalysis of the reaction: FMNH2 + O2 <=> 5,6-dimethylbenzimidazole + D-erythrose 4-phosphate + dialuric acid.                                                                                                                                                                                    |
| GO:0102919 | 2 | 9  | 22861 | 6830  | 46171747 | 3.93684E+12 | 1.47904E+12 | 1.41237E+16 | 7.99749E+14 | 1.83454E+16 | 5,6-dimethylbenzimidazole synthase activity                                                                                        | Catalysis of the reaction: FMNH2 + O2 <=> 5,6-dimethylbenzimidazole + D-erythrose 4-phosphate + dialuric acid.                                                                                                                                                                                    |
| GO:0102933 | 3 | 10 | 26855 | 5230  | 46173347 | 3.7237E+11  | 1.13256E+12 | 1.71715E+16 | 1.21322E+16 | 3.74092E+15 | GDP-4-dehydro-6-deoxy-D-mannose-4-aminotransferase activity                                                                        | Catalysis of the reaction: GDP-4-amino-4,6-dideoxy-alpha-D-mannose + 2-oxoglutarate = GDP-4-dehydro-6-deoxy-alpha-D-mannose + L-glutamate.                                                                                                                                                        |
| GO:0102943 | 3 | 7  | 26855 | 4721  | 46173856 | 2.60659E+12 | 1.02234E+12 | 1.3503E+16  | 2.22178E+16 | 4.21296E+15 | trans-2,3-dihydro-3-hydroxy-anthranilate isomerase activity                                                                        | Catalysis of the reaction: (2S,3S)-2,3-dihydro-3-hydroxyanthranilic acid = (1R,6S)-6-ammonio-5-oxocyclohex-2-ene-1-carboxylate.                                                                                                                                                                   |
| GO:0102971 | 2 | 32 | 22861 | 25310 | 46153267 | 1.39976E+15 | 54808964772 | 1.3527E+16  | 29428974913 | 23880423809 | phosphinothricin N-acetyltransferase activity                                                                                      | Catalysis of the reaction: acetyl-CoA + phosphinothricin <=> H+ + coenzyme A(4-) + N-acetylphosphinatothricinate.                                                                                                                                                                                 |
| GO:0102971 | 3 | 33 | 26855 | 25310 | 46153267 | 1.22882E+16 | 54808964772 | 1.16479E+16 | 27751279993 | 1.54902E+11 | phosphinothricin N-acetyltransferase activity                                                                                      | Catalysis of the reaction: acetyl-CoA + phosphinothricin <=> H+ + coenzyme A(4-) + N-acetylphosphinatothricinate.                                                                                                                                                                                 |
| GO:0103047 | 1 | 85 | 60795 | 9195  | 46169382 | 1.39814E+16 | 1.99118E+12 | 2.81181E+15 | 1.85581E-26 | 1.91566E-23 | methyl beta-D-glucoside 6-phosphate glucohydrolase activity                                                                        | Catalysis of the reaction: methyl beta-D-glucoside 6-phosphate + H2O = beta-D-glucose 6-phosphate + methanol.                                                                                                                                                                                     |
| GO:0103053 | 3 | 14 | 26855 | 6187  | 46172390 | 5.21318E+11 | 1.3398E+12  | 1.96015E+15 | 2.47835E+11 | 1.41537E+12 | 1-ethyladenine demethylase activity                                                                                                | Catalysis of the reaction: 1-ethyladenine + O2 + 2-oxoglutarate(2-) <=> adenine +                                                                                                                                                                                                                 |

|                   |   |     |       |       |          |             |             |             |             |             |                                                 |                                                                                                                                                                                                                                       |
|-------------------|---|-----|-------|-------|----------|-------------|-------------|-------------|-------------|-------------|-------------------------------------------------|---------------------------------------------------------------------------------------------------------------------------------------------------------------------------------------------------------------------------------------|
| <b>GO:0103111</b> | 1 | 208 | 60795 | 76557 | 46102020 | 3.42133E+15 | 1.65785E+16 | 1.04525E+15 | 5.83232E-06 | 0.000891913 | D-glucosamine PTS permease activity             | carbon dioxide + acetaldehyde + succinate.                                                                                                                                                                                            |
| <b>GO:0106009</b> | 1 | 86  | 60795 | 31908 | 46146669 | 1.41459E+15 | 6.9097E+11  | 1.03369E+16 | 17396088.11 | 35914223.91 | (4S)-4-hydroxy-2-oxoglutarate aldolase activity | Catalysis of the reaction: a [PTS enzyme I]-Npi-phospho-L-histidine + D-glucosamine <=> D-glucosamine 6-phosphate + a [PTS enzyme I]-L-histidine.<br>Catalysis of the reaction:(4S)-4-hydroxy-2-oxoglutarate = pyruvate + glyoxylate. |
| <b>GO:0106287</b> | 3 | 11  | 26855 | 2766  | 46175811 | 4.09607E+12 | 59897904606 | 2.77366E+15 | 10613472127 | 1.01208E+11 | NA                                              | NA                                                                                                                                                                                                                                    |
| <b>GO:0106319</b> | 2 | 3   | 22861 | 1132  | 46177445 | 1.31228E+11 | 2.45135E+11 | 2.42042E+15 | 1.93509E+16 | 3.77599E+15 | NA                                              | NA                                                                                                                                                                                                                                    |
| <b>GO:0106320</b> | 2 | 3   | 22861 | 1132  | 46177445 | 1.31228E+11 | 2.45135E+11 | 2.42042E+15 | 1.93509E+16 | 3.77599E+15 | NA                                              | NA                                                                                                                                                                                                                                    |
| <b>GO:0106321</b> | 3 | 34  | 26855 | 24739 | 46153838 | 1.26606E+16 | 5.35725E+11 | 1.24078E+16 | 7426421305  | 52149138722 | NA                                              | NA                                                                                                                                                                                                                                    |
| <b>GO:0106322</b> | 3 | 34  | 26855 | 24739 | 46153838 | 1.26606E+16 | 5.35725E+11 | 1.24078E+16 | 7426421305  | 52149138722 | NA                                              | NA                                                                                                                                                                                                                                    |
